# Supplementary material for: Comparative genome-wide analysis of extracellular small RNAs from the mucormycosis pathogen Rhizopus delemar
Source: PubMed Central journal article supplement (PMC5869740; doi:10.1038/s41598-018-23611-z), 2018-03-27
Supplement: 41598_2018_23611_MOESM1_ESM.pdf [file 41598_2018_23611_MOESM1_ESM.pdf]

Supplemental information for

"*Comparative genome-wide analysis of extracellular small RNAs from the mucormycosis pathogen *Rhizopus delemar**" by MX Liu, GO Bruni, CM Taylor, ZG Zhang, and P Wang

Supplemental Table 1: FGSC-9543 miRNA

miR419 28551 TGAGGAATGATGACGTGAG  
miR9552b-3p 31309 TGGCGAGAGACCGATAGC  
miR6478 17010 CCGGCCTTAGCTCAGTTGGTAG  
miR2867-3p 10352 TCAGGACTTTGGGATGGCCA  
miR6202 5732 TGAGGATTTAAGCTTTGAAG  
miR398 2397 TGTGTTCTCAGGTCACCCCT  
miR3949 5724 TGAGGTATGAGCAAAAAGTG TAG  
miR1870-5p 4321 TTGCTGAATGGACCAGTGGCAT  
miR167d 1479 TGAAGCTGCCAGCATGATCT  
miR5163b-3p 11881 TAGATACTTTGGTTGTGGGA  
miR5632-3p 4262 TTGGATTTAAGTCTGGATACT  
miR5506 7838 TAGATCGCTTCGTTGAGG  
miR1216 9034 TGATGGGTTAGCGCTTGTAC  
miR166h-3p 929 TCGGACCAGGCTTCATTCCC  
miR1167 22718 TGGGCTGTGGATGACTTGAAAC  
miR847-3p 2321 TGACTCCTCTTCTTCTGGTCG  
miR168 937 TCGCTTGGTGCAGGTCGGGA  
miR1222a 3731 TATGAAGAAGTTCATTGTTGATA  
miR408-5p 646 ACAGGGAACAAGCAGAGCAT  
miR3476-5p 3139 TGAAGTGGGTGCTGCTGCTGC  
miR9674b-3p 3274 TGAATATGCCAGAGCATCAG  
miR5185l-3p 44848 TTGGACGTTGACTTAGAAC  
miR2111 1146 TAAACTGTGTTTGGGTTTGG  
miR3703 10101 TAGATTCATCAGCCATTGCC  
miR159a 480 TTTGGATTGAAGGGAGCTCT  
miR7697-3p 10380 TCCAATAACAATGATCGGATA  
miR1513a-5p 14033 TGAACAAAGCCATGGACTTGC  
miR5177 631 TGAGGTTGGAAAACGAGCAG  
miR161.1 1229 TGAAAGTGGCTCATCAAGGGGT  
miR7541 552 TGCAATGTCTCTTTTGCTGGCAC  
miR2609a 421 TGGAAGTAATGGCTCGTCACTT  
miR1431 2700 TTTGGAGTTGGCCACCGCTTGAC  
miR4413b 577 TAAGAGCAAGTATAAGTCACCT  
miR171n-5p 3394 TATTGGTGGGTTCAAGTACGG  
miR8044-5p 514 TTGTCAAATGGTTGGAGATTT  
miR8123-3p 8419 TTGTCGCCATTGGTCCAAGTC  
miR832-3p 8023 TTGATCGAATCCAAGCCAAG  
miR8179 2349 TTGATCTGCATTCACTTGATCG  
miR2275a 1746 TTTGGTTTCCTCCGTTCTCAT  
miR5718 715 TCAGAACCAAGACCAGAGCCAAG  
miR5821 1391 TGGACGGAGACGATGGTAGAG  
miR6023 2605 TTGATGACAGTTTTTTGGAT  
miR169d 393 TTAGCAAGGATGAGATTACCGG  
miR171a-3p 387 TGATTGAGCCGCGCCAATAT

miR5562-3p 22759 ATGGGACGCAAGGCTGAAAC  
miR1146 4395 TTGGGTCCGACGGGAAGTCTT  
miR7536a 7919 TGAAGCATGCTCGAGACTG  
miR5679 1709 TTGGTGCAGAAGAAGTTAGA  
miR3440b-3p 2585 TGGATCCGGTCAAGGGAAAGCT  
miR6221-5p 571 TCTGTCTTCTGGCCCCGTGTCT  
miR7761-3p 6731 TCTCGAATCAAGGACGCTCTGG  
miR408-3p 193 ATGCACTGCCTCTTCCCTGG  
miR826b 731 TGGTCTTGACATCGATGAAAAT  
miR403a 754 TTGACGATTCACGCCAATCTTG  
miR1098 601 TATGCGTTTTTGTCTGAAAT  
miR3435-5p 179 TGCATCAACTCTGTCAATTTCC  
miR7763-5p 3196 AACTTCATCGTGCTGGGGATAG  
miR9491 2539 TGCTATCTTCCTCTGACTCAG  
miR1435a 258 TTTCTTAAAGTGCAAGTTTTTC  
miR160b 394 TGCCTGGCTCCCTGTATGCC  
miR168a-3p 161 CCCGCCTTGCATCAACTGAA  
miR7803b-3p 2047 TGACACGTCGTCAATCATGTACT  
miR5293 691 TGATGAAGAAGTGGCGCAGAAGA  
miR156i 394 TGGAACAGAAGAAGACAGCAG  
miR5741a 3771 TAGGAGCAAATTGATGTGTTT  
miR165a-3p 105 TCGGACCAGGCTTCATCCCC  
miR394a-3p 195 TGTTGTCATCTCTTTTGTA  
miR2111-3p 511 GAAGTCAGGTGGGATTACC  
miR397a 158 TCATTGAGTGCAGCGTTGATG  
miR774b-5p 339 TGAAGATGCATATTTGGAGTGAC  
miR8034 2833 TATGACAAGCCTGCACAAACT  
miR8748 688 TGATGGTGATGATAATAATGAAT  
miR5678 2543 TTCCATGCATAAGACTTTCC  
miR951 231 TGCTCTTGACGATCTGGCTACG  
miR482e 589 TTGCCTATTCCTCTGCCAAG  
miR5144-3p 787 TACTCACTGCACAGCACAAGAAAG  
miR9558-3p 1616 TTGCAAGGCCAGCTTTTCCTCT  
miR5252 1152 TTGTAAAGCTACTGAAGTCTGC  
miR4401b 4514 TCAAAGACGGTTGTGAGCAA  
miR403-3p 87 TTAGATTCACGCACAAACTC  
miR164b 84 TGGAGAAGCAGGGCACGTGC  
miR9559-5p 3549 TTTGATTTTGGTTCATTTTG  
miR6279 38067 TAGACAAGACTTCCAGCCAGACG  
miR6118-5p 139 TGAATGGGTGCTTGGGAAA  
miR9409 499 TTTTGT CATAGTTCATTTTC  
miR7512 88 TACTACTTGTAGCTTATGCCAT  
miR166b 651 TCGGCCAGGCATTCCTTCCAA  
miR6214 8518 TGACGACGAGAGCGACGATCA  
miR9657a-3p 455 TGGTGCTTCCTGTCTGACAGGT

miR825-3p 725 TGGTCTCGATAAGGTGCATTAAC  
miR529a 989 TTGTCGCTGCTCTCTTCTTC  
miR833a-5p 181673 TGGCTTTGTTTGTACCCGGTCTGT  
miR8141 1274 TGCATACTAGTTGGTGGT  
miR7539 130 TGAGAGAGAAGAGCTATGAGG  
miR3627-3p 346 TGCTCGCTGTCCTCGTGACAAG  
miR167c-3p 178 TGTATGACTTGGTAGTTTCACC  
miR5219 220 TCTGGACTCTCAGCTGCTGCGT  
miR6255 1033 TGGGAAAGAATGGACGATGAGT  
miR391 5270 TACGCAGAGGGAGACGTCG  
miR7817a 8659 TTTGGTTGAACTTGTCTCGAGAC  
miR162-3p 54 TCGATAAACCTCTGCATCCA  
miR6117 2282 GGGGCTGATCCGGGTTGAAGAC  
miR164b-3p 664 GCGCCAGCTTCTCCACC  
miR7719-5p 146 TCCTCCATAAGCATGTTTCTTC  
miR7502b 3000 TTGTTAATAAGTTCATGCAT  
miR477 2210 TTGGAGTATCTTTGGAGGAGC  
miR396b 101 TTCCACAGCTTTCTTGAAC  
miR156f-3p 368 TGCTTCACTGCTCTTTTCAGAT  
miR6282 941 TTGATCATGTGGGGATGTATAA  
miR6277 427 TGTGTGTGAAAGAGACGGAG  
miR158-5p 126 CTTTGCCTATCGTTTGGAAAA  
miR7716-5p 330 TAGTTGATAAGTAAGAACGAGAC  
miR6194 101 TAGTAGGGATCTTGACACACGAG  
miR6209 404 TGAGCATCAGAAGCTGTGCG  
miR2905 127 TACTGTAGCCGACAAAGGCA  
miR7695-5p 196 TTGCCATTGAGCACGCCAGTGAA  
miR1425-5p 10962 TACTGATCATCCTTGCTGCT  
miR775 3502 TTGCGATGTCTTGCAAGTCAA  
miR4374b 977 TCTTCAAAGACGGTTGTGAG  
miR399f 1564 TGCCAACGCGATTTGTCCTG  
miR2611 774 TATTTTCAGTGTTGTGGTAGAA  
miR854 213 TGATGAGGATATTGAGAAGGG  
miR5565e 423 TATGGTCTAGATGTTGTCGGA  
miR319c 734 TTGGATGAAAGGGGCATGCT  
miR3712 3414 TGCTGATCAAGATCAAGACCA  
miR9727 53 TGTGTAACTCTGAGAACTGAG  
miR1061-3p 1620 TGTTAGCATGGAATAATG  
miR1857-5p 10996 TGGATTCTTTTGGAGATGCGG  
miR6114-5p 179 TCGAAAGCACCATGAACGTGA  
miR1152 714 TAAAAGGAGCGCGTCTTGAA  
miR7725a-3p 189 TGCAAACAACCTCATTTCGTCAAG  
miR835-3p 535 TGAAGAGATACGCCAGGAG  
miR416 1269 TGTTAGTCGTACCACTGTTTCAAG  
miR536f 4260 TTCCGTCCAAGCTGTGTTGA

miR5512a 9697 TAGGATCATTGTCATGCTAAAAT  
miR773a 993 TTTGCTGCCACTTTTGTACAG  
miR1120c-5p 563 TAATATAAAATGCTTTGTTGAC  
miR5788 122 TGGATAGTTATCAGACTCTAGTA  
miR5561-5p 15108 CATTTGGTGAGAGACATGGACAA  
miR1068 371 TAGCCAGTTTTGCTTGCAGGTC  
miR8554 80 TGCTTATGACTTTGATTTGGGA  
miR5373 793 TCTCTTGTATGCTGATGATGTT  
miR475a-3p 917 TTAATGCCCATGACTTCAG  
miR2644 129 TCTCTTCAGTTGATGGTTGT  
miR5632-5p 154 TGTCATTCTTTATCCAAGT  
miR6248 502 TATTGAGGTGGAGGTTAGTG  
miR398b-3p 2330 ATGTGTTCTCAGGTCACCCCT  
miR169f-3p 2005 TGATGTCTTCCTTTGGTTACT  
miR9760 54 TGATGATGTAGTCTTGATTGGT  
miR7120a 192 TGTTATTTGTCAGATTGATTCT  
miR1023e-3p 1630 TGGGAAACGGGTTGGAGTGCAT  
miR5766 1300 TTAGGCAGAGGAATAGGCAAG  
miR1160.1 368 TTCCCTCTTTTAAAGCATGGCC  
miR6269 4205 TGCTGCAAGTGATTAGCCATGG  
miR4227 1933 TCTGGTACCAATCTTTCA  
miR4412-5p 652 TGTTGCGGATATTCTTTGCACT  
miR5241a 2663 TGATGATGGAAGAGGGAAT  
miR6182 2789 TGGTCTGTGATGGATGCGTT  
miR158-3p 74 TTTCCAAATGTAGACAAAGC  
miR6266a 192 TATATGCAGGCGGCAAATAT  
miR5176-5p 767 TATTCCATGTGTCACATCTC  
miR1886.2 2242 TGGATGATATTGTGATTGG  
miR6232a-3p 35 TGGATGCTAGCAAAAAGAAAGT  
miR902h-3p 563 TAGAAGGGTCTCCACACAAAC  
miR6185 775 TCTGGCAGCACGGGTAACAGTA  
miR5526 16789 GAGTTGAGTCAGGTATGAG  
miR8581 25 TAGAGAATTTTGTAGACAACTG  
miR845a 61 CGGCTCTGATACCAATTGAT  
miR5239 1139 TGGGAGAAAACATAGGTG  
miR6025e 1670 TGCCATTATAGATCTGACATGC  
miR4397-3p 37 TTCAAAGATGTGGAGAAAGACT  
miR9752 1252 TGCTTCTTGCTGTTCCATGATTT  
miR6485 650 TGGATGTACCAGAGCATCAA  
miR869.1 8028 TGGGTTCAAGTCTGGTGATTG  
miR6464 138 TTGATTGTTTGTGGTATTATT  
miR5387a 3592 TAACACGCCGGTCTACAGTATC  
miR415 189 AAAGGAACAGAAGCAGAAGCAG  
miR7807a-3p 368 TGAGGATTTGCATACATAC  
miR7542 93 TGTTGCGTTCATAGATGGTA

miR1076-5p 32 TATCACAAGCGCGACTAATTGT  
miR7814 106 TAATATGTCTTTGATGCTTTGA  
miR2105 59 TTGTGATTTGTGAATGGTTGAT  
miR414 126 TACCATCTTCTTCATATCGTCA  
miR172k 1138 TGAAGTGGATGCTGCTGCT  
miR447a-3p 10180 TTGCGGACGAGAATTTTGTG  
miR482d-3p 139 TTGGCCGACCCTACCTATGCCA  
miR1535a 154 TTCTGTTTGTGCGTGATGTCTT  
miR5261 383 TCATGTCAGATGCTTTGGTCT  
miR2595 873 TACATTTCTACTTCTCTGTCT  
miR8043 171 TGATCATACTATGGATTTGGCC  
miR5658 310 TGATGATGATGATGTTGCAGAA  
miR2082 108 TGTTGTTCCCTTCTTCTTCTCT  
miR535d 54 TGAACGACGATAGAGAGCAC  
miR7495a 664 TTCTTGAGTGCCTCCTTCA  
miR6108d 75 TAAGGAGATTAAGCTGAAAAAGT  
miR8741 1342 TGGCCTGAATGAATGATGATGG  
miR1072 42 TATTGTTGTTATTTGAGCTTGG  
miR9742 284 TGTATTGTTTGTCTGTGA  
miR5751 60 TTGATTTGCAGATGCCTTTT  
miR1428b 31 TATAAGAAATGCCATGAATTCT  
miR5743a 124 TGAGAAGTTTTCCCACCATT  
miR6462e 474 TTTTTGCCTTTTTGTCTACT  
miR827 22 TTAGATGACCATCAACAAAT  
miR5654a 25 ATAAATCCCAAGCATCATCC  
miR7508 237 TAAAAACAAGTCGGGAGG  
miR6443 13985 GTAAGGTCAAGATGATGAG  
miR863-5p 823 TTATGGCTTGTGTATATCAT  
miR6473 138 TCCACAATGCCAAAGAGTT  
miR5144-5p 2073 TTCTTGTGCTGTGCAGTGA  
miR7837 70 TGGGTGTAGGAGTGGTAGCTG  
miR8148 682 TGATTGGGTCTGCATGCCGTGGT  
miR894 87 TGTTTCACTCCGGTTCACAC  
miR4244 396 TAGTTGTTCCCTGGAGATGTG  
miR3623-3p 74 TGGTGCTGTGCAAGAATTTGCT  
miR5065 3371 TAGGCTTACTTATACATT  
miR444b 542 TGCCGTTGCTGTTTCCAAGTT  
miR855 26 TAGACAAGCTAAGGACAAAGGAA  
miR5015 565 TTGGTGATGTAGTAGTCTAC  
miR8571 624 TTCATCGTCAAGATCCTGTTCT  
miR9667-5p 599 AAATTGGCAAACATGGTTG  
miR1097 114 TGCCATTGTTTGTGTTGGAAG  
miR857 1867 TTTGAATGAGTGTATGGTGGTAT  
miR827-3p 424 TAATATGATCCATCCAACAAACG  
miR4348c 464 TGTAAACCTTGGAAGAGACCA

miR157a-5p 27 TTGACAGAAGATAGAGAGCA  
miR8773 38 TTGGATGCAATCGGTGGTTTAT  
miR4221 66 TAAGAGGTTCAAAAGGTAGGAAA  
miR8602 1063 TCAGGAGAGTATGCTGGCCA  
miR902a-5p 336 TACTGCATGCACGCTTCTTCA  
miR6270 2366 TTCGCTATTGGAATCTTCATCT  
miR3510 539 TTAACCATCTTTCGGGACTGAA  
miR1515 207 TATTTTAGCATGACAATGATCC  
miR913-5p 422 TGACATCTTGCGAGACCGAGG  
miR6116-3p 1325 TCATTTGTCATCCAAGCATTAG  
miR7709-3p 65 TGACCTAGTCATATTTGAT  
miR163 854 TTGAAGAGCAGCATGGAATTCGT  
miR6030 158 TTCAACCATAACCAAGACCC  
miR2100-5p 169 TGCTCTCAAGTCTGCCAAACGA  
miR8183 52 TTGTAGTTGACGGACAATTGGC  
miR9653a-3p 2508 TTGGGACTTTGGGCTGGCC  
miR478a 21 TGGGTCGTCTATTTTTAGGAGA  
miR3440 843 TGGATTCGATCAAGGGAAAGC  
miR9560b-3p 66 TCACTCTTAGTTCTACTCGTGCT  
miR7800 4712 TATTTTTGTCTCGTCTGGTC  
miR157a-3p 25 GCTCTCTAGTCTTCTGTCAT  
miR847-5p 754 TATTGATGAGGAGGATGGA  
miR8175 64 CGATCCCCGGCAACGGCGCC  
miR5021 123 TGACGATAGAAGAAGGAAAA  
miR5499 140 TACAGGAAGATCGTTTGGAA  
miR1108 464 TAAGCTGGAAACATAACGCC  
miR5557-3p 1610 TGCTTGCATTATCTTGTTGA  
miR8016 2557 TTTTTGAATGAAGGCCTGTGG  
miR9672-5p 228 CCTAAGGCAGTCAGTGGTGTC  
miR8775 143 TTGCAGATTGAACCGATGG  
miR5648-5p 6143 TTTAAAAATTTGGCCTTGACT  
miR3946 26 TGTAGAGAAAAGAGAGAGCATG  
miR2868 301 TTGATTTTGTGTAGTAGCA  
miR5246 3951 TTGAGACAGCTTTGACTT  
miR5532 108 TGGAATATATCACACAAGTTGG  
miR9554-3p 244 TCATAGCTCAAGTCATCATTAT  
miR5554a-5p 515 TGTTGCAGATCTTGAACAATGTT  
miR8011a-5p 91 TTGGGTTGAGCTTTCTTTTTTTC  
miR5281b 560 TTTTAATAAAAGGAACGGAG  
miR1857-3p 1199 TCATGGCTCCAACAAAACAAG  
miR7753-3p 659 TTGAGCAATGGAGAAGAAGG  
miR8762d 2137 TTGTAACTTTGATCGATGTCT  
miR2633 403 TCGACATTTGCACCAGATTCT  
miR822-5p 324 TGCGAAAGCATTGCGCAAG  
miR5786 27 TTCGCAGGATAGAGGTCAAGCT

miR1047-3p 141 TGATCAGCATACTTCAGTTG  
miR530 298 TGATTATGCACCTGGCTCTC  
miR4240 722 TCGACTGACTCGTAACATTTTC  
miR8658 2180 TTGACAAAGTACAGAGACCAT  
miR5208d 161 TTTAGTCATAGTTTGTAGGCAA  
miR8632 848 AGAGCTCAAAGTTGGAACC  
miR7734-3p 65 TGGAACCAGTCCACATTCAACG  
miR5641 31 TGGAGGAAGATAGTAAAGAATTA  
miR5534a 2639 TACGTAGCATCAGCTAGAATGG  
miR8610.2 206 TTCTTGAACAAATTGAAGGGC  
miR1850.1 70 TTGAAAGTTTGGGAGTTGGG  
miR9722 131 TAAAGATGGGAAGATGAAGAA  
miR170-3p 454 TATTGGCCGTGTAATATT  
miR9662a-3p 556 TTAACATCCACAGAGCCAAG  
miR1169-3p 365 TGTGGATGTTGCTTTCTGTGACC  
miR7711-5p.1 5545 TACTTAGCTGTTTGACTTCTTG  
miR159g-3p 221 TTTGGAGTGAAGCGATTTGA  
miR6148b 6040 TCTGTTATGTTTGTTC  
miR5038a 801 TGGAATCTTGGCCTTTTCCA  
miR7716-3p 117 TTCTTCATCCTCCAGTAATGCC  
miR840-3p 120 TGGTTTATGTCCTTAGTTTC  
miR5244 158 TTCTCTTGAAGTAGTTGTTGGT  
miR5369 107 TCAAGAAAAGGAGGATGTCCAT  
miR823-5p 44 TTTGTATTGATCACTGACCATT  
miR842 273 TATGGTCCCAGATCCGTC AACC  
miR1044-3p 94 TGTGGTGACATATTTGTTTG  
miR6155 173 TGAGTTGCCTGTGCCTTGCA  
miR3631a-3p 3482 TAATTGGATTATGTCTTAACAA  
miR2612 967 TGATAGTGGCAGTAGTATCAG  
miR2602a 3971 TTCCAGTGATTGCCAGCAT  
miR4414b 143 TGTGAATATGCGAGAGCCAAG  
miR6459a-3p 1094 TTGATTTGGGCTTGAATTGA  
miR5758 762 TAAGTGAAGAATGTCCTTG  
miR9486a 56 TCTTTCAAGAGTTAGAGGTTC  
miR5568e-3p 183 TATCTAGAAATGGTCAAAACG  
miR5020c 99 TGGCATGCAAGAGGTCGAC  
miR5566 268 TACATCACCTCCCTGTCTGT  
miR6451 179 ATGTAGATCATGTTGATT  
miR2927 625925 TGTCTGTCGTGATCAGCCCATG  
miR2091-5p 274 TCTACGAGCCAGCAGGAGGAGG  
miR8126-3p 100 TTCAGTATATTTGTCATCAGAG  
miR867 1458 TTGAACAGGATTATTAGAGAG  
miR5037c 777 AGTTGAACTTTGGGCCCG  
miR8137 249 TATCGCAACCAGTTCACAAAAT  
miR2275b-3p 342 TTCAAGTTTCCATCGTAAATCTA



miR5298d 51 TAGAGATGAAGAAGCTGAAAGAA  
miR7492n 2574 TAAGATCAGGGCTTTGAGCTGG  
miR9759 12 TAGTAAGCAAGTACGAGTTTAT  
miR6147 20 TGACATGCATCAAAACCCCACTG  
miR5169a 78 TTTGTCCGATGTGTTGTAGAACA  
miR8048-3p 39 TAGATGGAATGCATAATGGACA  
miR2654 300 TATTCAGGGACCGAAGTGTGC  
miR1885b 13 TACATCTTCTCCGCGGAAGCT  
miR476 1845 TGGATCCTTCTTTCAAGGTC  
miR396a-3p 15 GTTCAATAAAGCTGTGGGAA  
miR3434-3p 4324 TCAGGATCAGCCAAGTTGA  
miR5228 574 TAGTGGTGATAGCAACTTGATGGA  
miR2651 1721 TGTTGATTGATATGCTGATT  
miR3449-5p 782 TCCAATCGCTTTCGTCTGT  
miR8135 44 AGGATTTATGCTTGGTGAT  
miR824-5p 400 TAGACCATTCTTGAGAAGA  
miR6156 2303 TTGAAGAAGTTCTTTGTTCTGT  
miR9476-5p 123 TCTAGTCTTGCCACTTTTTTTTT  
miR1048-3p 4501 TGTCTACGCTTATGTTCCCTAG  
miR6476a 185 TCGGTAGGTGATGAACATGA  
miR1214 219 TACTTAGAGTCTCGCGGCAC  
miR1917 1307 ATTGATCAAGGTCTAAAGT  
miR1849 4999 TAGCGTATCATAGGTTGGT  
miR2678 515 TGAATTGTTGGGATTGTACTT  
miR7729a-5p 491 TGTTTTCAAGTAGGACAGTGAGC  
miR1512a-3p 580 TGCTTTAAGAATGTCAGTTTTG  
miR1115-5p 50 TGAGGTAAGTGGCCTTTGGTGG  
miR3711 61 TAGCCAAGAAGGAGGTGCCT  
miR528-5p 31 TGAATGGGGATGAGAGGAGG  
miR1052 14 TTCCTATTTTATTGACTGTGTTA  
miR858b 619 TTCGTTCTGTTCGTCGCTTG  
miR5243 185 TGGGCCAGAATCGTGGGC  
miR9492 665 TACTTCTCTGTCTTGGTAT  
miR4387a 29 AACCAAGCCGGTGTGGGTGACACT  
miR5818 169 TCCAACAGAAGGGCCACTT  
miR7543 37 TTCATATACATGTTTGACAA  
miR4385 13 TAATGTTGTAAAAAGGATTGGT  
miR5022 284 TAATGGGGTATGTCGAAG  
miR9677-5p 429 TTTCTCTCCAACAGCCAAG  
miR8603 143 TGAGCTTGTGGTGAGCATTGT  
miR6029 35 TGTGGTTGATGATGTTTCAGGCT  
miR1320-5p 15 TGGAAGGAGTGTAAAGTTTATAG  
miR8578.2 325 TATGAGTGTATTAGCAATG  
miR6477 1266 TGAACAGTAGAGGATGAT  
miR5639-5p 163 TTGTTCCACGTGTCTAAGGC

miR6267a 30 TGAGAGAGGTGGTAGAGTGTG  
miR1522 91 TTTATTGTTAAGCATGAAAG  
miR5227 165 TGAAGAAGAAGAAGTTGAGGAT  
miR5645a 454 TTTGCAGTCACGGCGTTAAG  
miR9553-3p 45 TAATCATCCCAGCTATGAACAT  
miR6253 89 GAGGAAAGTCGGGGAGGTGGGT  
miR1428e-3p 80 TAAGAAATGCCATGAACTCTTT  
miR8048-5p 1124 CATCATTACATTCCATCTG  
miR1211-3p 1626 TCACACCGTCTCTTCATGC  
miR5287a 647 TTGCAATATTATGACGGAGGAT  
miR9663-5p 8859 AACGTAGTCGACCGATTCT  
miR6274b-3p 785 TTGTGGTAGACCGAAAATAG  
miR915 42 TGGCAATAAGGACAACGTCGTC  
miR2108b 920 TTAATGTATGTGTTTGTAGT  
miR5260 1135 TGTTGTATTGATGACTGGCTAT  
miR5256 81 TAATGGCTTGTAAGAATTAA  
miR5726 136 TAAAGAGTTGCTTGAATCAGG  
miR9738 174 TGAAACATATTGGGCTCGTC  
miR856-3p 1583 TGAATGTGATTGTGGTTAAA  
miR5042-3p 4880 TGGGCTTGAGTACAAGAAGG  
miR5080 423 AAAAGGATCATGACGGTACATG  
miR950 11 TCTGGTCAGCTGGTTTGTAT  
miR2656a 4528 TAAGTTGCATATTGGACGTTGG  
miR3441-5p.2 11 TCAAGAAAATGAAGTCGCTTTT  
miR2622 3447 TTTGAGGCCATCGTGAAACATTA  
miR1148.2 25788 TGGAGATCCGCCTGTGCCGGG  
miR6264 218 ATTCTTGGACCGTGTCAA  
miR8743a 42 TATCGCAAAAGTATAAAATGGTC  
miR5809 4005 TCGGCTGGCGACCAAAGC  
miR5059 58 CGGCCTGGGCAGTACTACCAA  
miR1514a 50 TATCAATTTGAACTAGGCATG  
miR1172.1 7037 AGGATTTGCAGCAGCAAAGGAG  
miR5081 251 TGAATTTGTAAAATTGATACT  
miR5570 30 TAAAAAACAAATTAGCATGTGCA  
CDC-8219 miRNA  
miR398 40402 TGTGTTCTCAGGTCACCCCT  
miR167d 17966 TGAAGCTGCCAGCATGATCT  
miR166h-3p 12554 TCGGACCAGGCTTCATTCCC  
miR168 13383 TCGCTTGGTGCAGGTCGGGA  
miR408-5p 10814 ACAGGGAACAAGCAGAGCAT  
miR159a 7576 TTTGGATTGAAGGGAGCTCT  
miR171a-3p 5290 TGATTGAGCCGCGCCAATAT  
miR160b 2733 TGCCTGGCTCCCTGTATGCC  
miR2867-3p 12873 TCAGGACTTTGGGATGGCCA  
miR6478 14384 CCGGCCTTAGCTCAGTTGGTAG

miR1216 23238 TGATGGGTTAGCGCTTGTAC  
miR408-3p 2025 ATGCACTGCCTCTTCCCTGG  
miR164b 1616 TGGAGAAGCAGGGCACGTGC  
miR171b 1283 TGATTGAGCCGCGTCAATAT  
miR6202 3214 TGAGGATTTAAGCTTTGAAG  
miR1167 21590 TGGGCTGTGGATGACTTGAAAC  
miR9552b-3p 11157 TGGCGAGAGACCGATAGC  
miR168a-3p 1821 CCCGCCTTGCATCAACTGAA  
miR7541 1507 TGCAATGTCTCTTTTGCTGGCAC  
miR397a 1056 TCATTGAGTGCAGCGTTGATG  
miR403-3p 893 TTAGATTCACGCACAAACTC  
miR158-5p 1167 CTTTGCCTATCGTTTGGAAAA  
miR1870-5p 2076 TTGCTGAATGGACCAGTGGCAT  
miR165a-3p 736 TCGGACCAGGCTTCATCCCC  
miR396b 690 TTCCACAGCTTTCTTGAAC  
miR162-3p 622 TCGATAAACCTCTGCATCCA  
miR5163b-3p 10861 TAGATACTTTGGTTGTGGGA  
miR5506 7191 TAGATCGCTTCGTTGAGG  
miR8141 1860 TGCATACTAGTTGGTGGTGT  
miR419 3817 TGCGTGAAGCTGAAGATGTTG  
miR8179 3178 TGATCTGCATTCACTTGATCGT  
miR951 661 TGCTCTTGACGATCTGGCTACG  
miR8044-5p 698 TTGTCAAATGGTTGGAGATTT  
miR398b-3p 39848 ATGTGTTCTCAGGTCACCCCT  
miR847-3p 1575 TGACTCCTCTTCTTCTGGTCG  
miR4413b 652 TAAGAGCAAGTATAAGTCACCT  
miR161.1 1043 TGAAAGTGGCTCATCAAGGGT  
miR3703 4410 TAGATTCATCAGCCATTGCC  
miR167a-3p 451 GATCATGTTTCGCAGTTTCAC  
miR1513a-5p 4045 TGAGAGAGATAGCATGACTAC  
miR2111 643 TAAACTGTGTTTGGGTTTGG  
miR6214 9325 TGACGACGAGAGCCACGATCA  
miR157a-5p 509 TTGACAGAAGATAGAGAGCA  
miR5185l-3p 36102 TTGGACGGTTGACTTAGAAC  
miR158-3p 398 TTTCCAAATGTAGACAAAGC  
miR5654a 252 ATAAATCCCAAGCATCATCC  
miR9674b-3p 1737 TGAATATGCCAGAGCATCAG  
miR845a 287 CGGCTCTGATACCAATTGAT  
miR5177 408 TGAGGTTGGAAAACGAGCAG  
miR1068 824 TAGCCAGTTTTGCTTGCAGGTC  
miR2609a 324 TGAAGTAATGGCTCGTCACTT  
miR156c 275 TTGACAGAAGAGACCGAGCA  
miR826b 783 TGGTCTTGACATCGATGAAAAT  
miR3435-5p 230 TGCATCAACTCTGTCAATTTCC  
miR1146 4822 TTGGGTCCGACGGGAAGTCTT

miR4401b 6013 TCAAAGACGGTTGTGAGCAA  
miR5821 1343 TGGACGGAGACGATGGTAGAG  
miR894 425 GTTTCACGTCGGGTTCCACC  
miR9409 954 TTTTGTTCATAGTTCATTTTC  
miR6221-5p 690 TCTGTCTTCTGGCCCGCTGTCT  
miR3476-5p 1781 TGAAGTGGGTGCTGCTGCTGC  
miR7803b-3p 8932 TGACACGTCGTCATCATGACT  
miR8123-3p 3600 TTGTCGCCATTGGTCCAAGTC  
miR399f 2630 TGCCAACGCGATTTGTCCTG  
miR9558-3p 2087 TTGCAAGGCCAGCTTTTCCTCT  
miR774b-5p 415 TGAAGATGCATATTTGGAGTGAC  
miR1885b 178 TACATCTTCTCCGCGGAAGCT  
miR7536a 5802 TGAAGCATGCTCGAGACTG  
miR391-5p 153 TTCGCAGGAGAGATAGCGCC  
miR529a 1022 TTGTCGCTGCTCTCTTCTTC  
miR2275a 773 TTTGGTTTCCTCCGGTTCTCAT  
miR827 101 TTAGATGACCATCAACAAAT  
miR172b-5p 240 GCAGCACCATTAAGATTCAC  
miR157a-3p 190 GCTCTCTAGCCTTCTGTTCAT  
miR4374b 576 TCTTCAAAGACGGTTGTGAG  
miR5679 1203 TTGGTGCAGAAGAAGTTAGA  
miR166d-5p 237 GGAATGTTGTCTGGCTCGAG  
miR5293 535 TGATGAAGAAGTGCGCAGAAGA  
miR169d 176 TTAGCAAGGATGAGATTACCGG  
miR403-5p 100 TGTTTTGTGCGTGAATCTAAT  
miR858a 162 TTCGTTGTCTGTTTCGACCTT  
miR6269 4731 TGCTGCAAGTGATTAGCCATGG  
miR5252 1548 TTGTAAAGCTACTGAAGTCTGC  
miR8175 546 CGATCCCCGGCAACGGCGCC  
miR5562-3p 7003 ATGGGACGCAAGGCTGAAAC  
miR156f-3p 158 TGCTCACGGCTCTTTCTGTGTCAG  
miR163 1843 TTGAAGAGCAGCATGGAATTCGT  
miR6117 3550 GGGGCTGATCCGGGTTGAAGAC  
miR400 84 TATGAGAGTATTATAAGTCA  
miR394a-3p 161 TGTTGTCATCTCTTTTGTA  
miR396a-3p 140 GTTCAATAAAGCTGTGGGAA  
miR7823 39095 TTGCATGCTGATCTTAGAT  
miR7761-3p 7399 TCTCGAATCAAGGACGCTCTGG  
miR6255 690 TGGGAAAGAATGGACGATGAGT  
miR5711 94 TGTTCTGTGGGTTTTTACCG  
miR6030 63 TCCACCCATACCATACAGACC  
miR1023e-3p 2150 TGGGAAACGGGTTGGAGTGCAT  
miR6118-5p 187 TGGAATGGGTGCTTGGGAAA  
miR8748 279 TGATGGTGATGATAATAATGAAT  
miR1511-3p 90 AGCCTGGCTCTGATACCATGAAG

miR7763-5p 2699 AACTTCATCGTGCTGGGGATAG  
miR6209 257 TGAGCATCAGAAGCTGTGCG  
miR394a 80 TTGGCATTCTGTCCACCTC  
miR5678 3106 TTCCATGCATAAGACTTTCC  
miR164b-3p 756 GCGCCCAGCTTCTCCACC  
miR6182 2384 TGGTCTGTGATGGATGCGTT  
miR8554 172 TGCTTATGACTTTGATTTGGGA  
miR9491 1144 TGCTATCTTCCTCTGACTCAG  
miR7817a 11605 TTTGGTTGAACTTGTCTCGAGAA  
miR5373 812 TCTCTTGTATGCTGATGATGTT  
miR825-3p 948 TGGTCTCGAGAAGGTGCATTATC  
miR416 1167 TGTTAGTCGTACCACTGTTCCAG  
miR390a-5p 48 AAGCTCAGGAGGGATAGCGC  
miR6282 914 TTGATCATGTGGGGATGTATAA  
miR395b 83 CTGAAGTGTGGGGGGACT  
miR1857-5p 11899 TGGATTCTTTTGGAGATGCGG  
miR857 178 TTTTGTATGTTGAAGGTGTG  
miR869.1 6716 TGGGTTCAAGTCTGGTGATTG  
miR5719 86 TTGTGATGATAATCCGACTT  
miR3946 67 TGTAGAGAAAAGAGAGAGCATG  
miR1098 364 TATGCGTTTTTGTCTGAAAT  
miR2111-3p 330 GAAGTCAGGTGGGATTACC  
miR5219 190 TCTGGACTCTCAGCTGCTGC  
miR169f-3p 1898 TGATGTCTTCCTTTGGTTACT  
miR1435a 56 TTTCTTAGGGTGCAAACCTTTC  
miR775 3724 TTGCGATGTCTTGCAAGTCAA  
miR7539 150 TGAGAGAGAAGAGCTATGAGG  
miR414 178 TACCATCTTCTTCATATCGTCA  
miR8034 793 TATGACAAGCCTGCACAAAC  
miR170-5p 43 TATTGGCCTGGTTCACTCAG  
miR1535a 165 TTCTGTTTGTGCGTGATGTCTT  
miR393a 64 TCCAAAGGGATCGCATTGATC  
miR7719-5p 85 TCCTCCATAAGCATGTTTCTTC  
miR159a-3p 7469 TTGGATTGAAGGGAGCTCT  
miR8571 2341 TTCATCGTCAAGATCCTGTTCT  
miR7725a-3p 116 TGCAAACAACCTATTTTCGTCAA  
miR2611 575 TATTTTCAGTGTTGTGGTAGAA  
miR6025e 3089 TGCCATTATAGATCTGACATGC  
miR7716-5p 192 TAGTTGATAAGTAAGAACGAGAC  
miR9657a-3p 152 TGGTGCTTCCTGTCTGACAGGT  
miR7502b 866 TTGTTAATAAGTTCATGCAT  
miR6028 30 TGGAGAGTAAATGACATTGAG  
miR5632-5p 100 TGTCATTCTTTATCCAACCTG  
miR319f 500 TTGGATGAAAGGGGCATGCTT  
miR4227 1308 TCTGGTACCAATCTTTCA

miR1140 86 ACAGCCTAAACCAATCGGAG  
miR447a-3p 18239 TTGCGGACGAGAATTTTGTG  
miR7512 32 TACTACTTGTAGCTTATGCCAT  
miR1520g 1217 CAACTCAGAACTGGTACGGACAA  
miR7837 126 TGGGTGTAGGAGTGGTAGCTG  
miR6270 3936 TTCGCTATTGGAATCTTCATCT  
miR5512a 17250 TAGGATCATTGTCATGCTAAAAT  
miR415 246 AAAGGAACAGAAGCAGAAGCAG  
miR773a 1082 TTTGCTGCCACTTTTGTACG  
miR477 1867 TTGGAGTATCTTTGGAGGAGC  
miR6114-5p 124 TCGAAAGCACCATGAACGTGA  
miR6185 741 TCTGGCAGCACGGGTAACAGTA  
miR482d-3p 150 TTGGCCGACCCTACCTATGCCA  
miR6464 20325 TGTTTGCTTGTTGATGTTGAT  
miR5387a 2357 TAACACGCCGGTCTACAGTATC  
miR6147 43 TGACATGCATCAAAACCCCACT  
miR390-3p 29 CGCTGTCCATCCTGAGTTTC  
miR1152 870 TAAAAGGAGCGCGTCTTGAA  
miR5246 4345 TTGAGACAGCTTTGACTT  
miR5788 57 TGGATAGTTATCAGACTCTAGTA  
miR9408-3p 20 TTTTCATCTTAGAGAATGTTGT  
miR902h-3p 794 TAGAAGGGTCTCCACACAAAC  
miR6462e 235 TTTTTGCCTTTTTGTCTACT  
miR2105 57 TTGTGATTTGTGAATGGTTGAT  
miR475a-3p 691 TTAATGCCCATTGACTTCAG  
miR6194 78 TAGTAGGGATCTTGACACACGAG  
miR1160.1 327 TTCCCTCTTTTTAAGCATGGCC  
miR902a-5p 482 TACTGCATGCACGCTTCTTCA  
miR842 278 TATGGTCCCAGATCCGTC AACC  
miR3712 2295 TGCTGATCAAGATCAAGACCA  
miR6279 14466 TAGACAAGACTTCCAGCCAGACG  
miR1120c-5p 261 TAATATAAAATGCTTTGTTGAC  
miR6029 28 TGGGGTTGTGAATGTT CAGCTA  
miR827-3p 318 TAATATGATCCATCCAACAAACG  
miR1428e-3p 95 TAAGAAATGCCATGAACTCTTT  
miR835-3p 429 TGAAGAGATACGCCAGGAG  
miR8598 2152 TTTAGTGCACGATGCGGAGGTGA  
miR854 150 TGATGAGGATATTGAGAAGGG  
miR7800 839 TATTTTTGTCTCGTCTGGTC  
miR7695-5p 92 TTGCCATTGAGCACGCCAGTGAA  
miR1072 32 TATTGTTGTTATTTGAGCTTGG  
miR9565-5p 638 TCCGTTCTGCTCGTTTCTCT  
miR5565e 240 TATGGTCTAGATGTTGTCGGA  
miR2863b 144 TGTTTATTTGGAGCTAGATGT  
miR5207 68748 TTAAGGAGGTTTTGGATGGCGA

miR5813 517 AACAGCCTCTGGTCGATGGA  
miR1446 177 TTCTGAAATCTCTGCGCATCAT  
miR6248 305 TATTGAGGTGGAGGTTAGTG  
miR5786 35 TTCGCAGGATAGAGGTCAAGCT  
miR4348c 266 TGTAAACCTTGAAGAGACCA  
miR7716-3p 57 TTCTTCATCCTCCAGTAATGCC  
miR5658 121 TGATGATGATGATGTTGCAGAA  
miR2082 102 TGTTGTTCTTCTTCTTCTTCTT  
miR5632-3p 223 TGGATTATATAGTTGATGAG  
miR2100-5p 135 TGCTCTCAAGTCTGCCAAACGA  
miR2592bp-3p 154 TGGCCGAACCTCCATGCATTGCGA  
miR3623-3p 45 TGGTGCTGTGCAAGAATTTGCT  
miR1061-3p 658 TGTGTTAGCATGGAATAATG  
miR9742 172 TGTATTGTTTGTCTGTGAGTA  
miR7807a-3p 503 TGAGGATTTGCATACATAC  
miR8773 46 TTGGATGCAATCGGTGGTTTAT  
miR4244 169 TAGTTGTTCTGGAGATGTG  
miR5648-5p 2487 TTTAAAAATTTGGCCTTGACT  
miR9760 33 TGATGATGTAGTCTTGATTGGT  
miR393b-3p 35 ATCATGCGATCTCATTGGAT  
miR1169-3p 262 TGTGGATGTTGCTTTCTGTGACC  
miR5015 432 TTGGTGATGTAGTAGTCTAC  
miR5641 42 TGGAGGAAGATAGTAAAGAATTA  
miR1428b 45 TAAGAAATGCCATGAACTCT  
miR6266a 133 TATATGCAGGCGCAAATAT  
miR2595 535 TACATTTCTACTTCTCTGTCT  
miR6116-3p 829 TCATTTGTCATCCAAGCATTAG  
miR7767-5p 61 CCCCAAGATGAGTGCTCTCC  
miR824-5p 81 TAGACCATTTGTGAGAAGGG  
miR478a 15 TGGGTCGTCTATTTTTAGGAGA  
miR5291a 323 TGTTTGTAGATGGATGGATGAT  
miR6232a-3p 22 TGGATGCTAGCAAAAAGAAAGT  
miR847-5p 652 TATTGATGAGGAGGATGGA  
miR9557-3p 14 GCTGAGTTGGAACGAAAAT  
miR1515 212 TATTTTAGCATGACAATGATCC  
miR5239 819 TGGGAGAAAACATAGGTG  
miR5499 237 TACAGGAAGATCGTTTGGAA  
miR2644 151 TCTTCAGTTGATGGTTGTGT  
miR824-3p 27 CCTTCTCATCGATGGTCTAG  
miR8762d 13170 TTGTAACTTTGATCGATGTCT  
miR5038a 569 TGGGAATCTTGGCCTTTTCCA  
miR1222e 78 TTAAAGGAAGCTTCAGTGGACA  
miR5554a-5p 805 TGTTGCAGATCTTGAACAATGTT  
miR5225a 134 TCTTGTTGAAGGTAAATGGTGC  
miR8632 1027 AGAGCTCAAAGTTGGAACC

miR9752 528 TGCTTCTTGCTGTTCCATGATTT  
miR1850.1 78 TTGAAAGTTTGGGAGTTGGGA  
miR7814 58 TAATATGTCTTTGATGCTTTGA  
miR9560b-3p 33 TCACTCTTAGTTCTACTCGTGCT  
miR5176-5p 506 TATTCCATGTGTCACATCTCT  
miR6155 192 TGAGTTGCCTGTGCCTTGCA  
miR7532a 353 GAACAGCCTCTGGTCGATGG  
miR5785 120 TAGTGTTGTCCGTGCGAATCAGA  
miR5080 611 AAAAGGATCATGACGGTACATG  
miR2612 1139 TGATAGTGGCAGTAGTATCAG  
miR4385 13 TAATGTTGTAAAAAGGATTGGT  
miR4412-5p 465 TGTTGCGGATATTCTTTGCACT  
miR5534a 1679 TACGTAGCATCAGCTAGAATGG  
miR4995 73 TAGGCATGGCTTGGTCAAGGA  
miR5766 1270 TTAGGCAGAGGAATAGGCAAG  
miR6169 606 TCGATATCGTCTTTTCTCTCT  
miR1512a-3p 844 TGCTTTAAGAATGTCAGTTTTG  
miR5261 199 TCATGTCAGATGCTTTGGTCT  
miR8741 153 TGGCCTGAATGAATGATGATGG  
miR9726 428 TACAGCGTTATTTTTCTTC  
miR6138 20 TACTTTGAGCATTGAAGAATAAA  
miR5244 38 TTCTCTTGAAGTAGTTGTTGGT  
miR823 68 TGTGGTGATCAAATGAAGAT  
miR528-5p 42 TGAATGGGGATGAGAGGAGG  
miR5021 131 TGAGAAGATGAAGAAGATACAG  
miR482e 298 TTGCCTATTCCTCTGCCTAA  
miR8048-3p 24 TAGATGGAATGCATAATGGACA  
miR1108 224 TAAGCTGGAAACATAACGCC  
miR4397-3p 12 TTCAAAGATGTGGAGAAAGACT  
miR7122-5p 2363 TTATCAGAGAATACTACGCGTCG  
miR833a-5p 42691 TGGCTTTGTTTGTACCCGGTCTGT  
miR9761 4000 TGAAGGATCAGGATATGCTTGT  
miR5208d 217 TTTAGTCATAGTTTGTAGGCAA  
miR5228 379 TAGTGGTGATAGCAACTTGATGGA  
miR5144-5p 1517 TTCTATCTGCTGCTGATGAGC  
miR2602a 2981 TTCCAGTGATTGCCAGCAT  
miR3440b-3p 1127 TGGATTCGATCAAGGGAAAGCCT  
miR3695 379 TCGTCGTCTTGGTCGTTTGGG  
miR5072 644 CGTTCCCCAGCAGAGTCGCC  
miR7699-3p 25 TGAAATACCATCATTAAATGC  
miR8603 165 TGAGCTTGTGGTGAGCATTGT  
miR6477 976 TGAACAGTAGAGGATGAT  
miR6108d 33 TAAGGAGATTAAGCTGAAAAAGT  
miR6274b-3p 673 TTGTGGTAGACCGAAAATAG  
miR6148a 158 TGCGGTCGATCGCTTGTCTT



miR5498 63 TGAGCGCAACCTTGAAGAA  
miR530 276 TGATTATGCACCTGGCTCTC  
miR160b-3p 12 CGTACAGAGTAGTCAAGCAT  
miR3510 541 TTAACCATCTTTCGGGACTGAA  
miR3711 73 TAGCCAAGAAGGAGGTGCCT  
miR838-3p 389 TTTATACATCTTTTCTTGCACA  
miR5369 54 TCAAGAAAAGGAGGATGTCCAT  
miR2199 83 TGATAACCAGAACGGATCGAC  
miR2654 144 TATTCAGGGACCGAAGTGTGCT  
miR9557-5p 9 TTTTGCCTTCAACTCGGTC  
miR8011a-5p 10 TGTGTGATGGTTTTATTGTTTC  
miR5232 1501 TGCATGTCCTCTACCTGAA  
miR2905 51 TACTGTAGCCGACAAAGGCA  
miR7734-3p 59 TGGAACCAGTCCACATTCAACG  
miR5650 291 TCGTTTTGGCCTTAGATACA  
miR535a 418 TGGCAACGAAGAAGAGAGCAGC  
miR6144 438 TGCGCCACTTCTTCATCATC  
miR7729a-3p 97 TAGCAATGGGGTTGTTGGAGGA  
miR8602 420 TCAGGAGAGTATGCTGGC  
miR2873b 224 TTGGATTGGATTTGGTTATT  
miR1214 287 TACTTAGAGTCTCGCGGCAC  
miR7495a 718 TTCTTGTAGTGCCTCCTTCA  
miR472-3p 18 TTTTGCCTACTCCTCCCATAC  
miR7120a 25 TGTTTGTGTCATGATTGTCAT  
miR9484 2970 TAGGCAAGGGAAGTCGGC  
miR1028a-3p 733 TGACATTGTAGATGTAGTT  
miR5054 307 GTTCCCCACAGTCGGCGCC  
miR863-5p 858 TTATGGCTTGTGTATATCAT  
miR9759 12 TAGTAAGCAAGTACGAGTTTAT  
miR1043-3p 979 TTGCGCGTTGAGATTTGAAGGA  
miR917 184 TCGTTCAGTCTATGTTTGAAG  
miR3627-3p 140 TGCTCGCTGTCCTCGTGACAAG  
miR5050 481 TGAGGTCGATTACCCAGCAT  
miR9411 107 TAGGACGACTTACACGTAA  
miR6284 108 TATGACCAGGATGAAGCTT  
miR1059 14 TGAAAGCTATCTTCACAACAAC  
miR1090 17 TGAAAGCCATACTACAATCAAAC  
miR7542 222 TAGCTTCAGCTTAAGATGGTG  
miR844-3p 39 CCATCTTACTCGTCTGTTTATT  
miR8183 48 TTGTAGTTGACGGACAATTGGC  
miR5544 256 AAAACACGCATAGGAAGTTGGT  
miR1122 167 TGATATCATCGGCATTTGGA  
miR1093 566 TGGATGTTCTTGCCAACGA  
miR6300 5277 GGTGGCTGTAGTATAGTGG  
miR5059 20 CGATCCTGGGCAGCACCACC

miR8126-3p 36 TTCAGTATATTTGTCATCAGAG  
miR444b 222 TGCCGTTGCTGTTTCCAAGTT  
miR7711-5p.1 5991 TACTTAGCTGTTTGACTTCTTG  
miR1147.2 48 GCTCGGCAAGTCTGGAAAGA  
miR1849 4514 TAGCGTATCATAGGTTGGT  
miR2678 576 TGAATTGTTGGGATTGTACTT  
miR2868 37 TTGGTTTCTGTGTGTAATAAT  
miR6422 487 TGTAGATAATGAATGGATAAAGT  
miR2108a 22 TTAATTGTTCTTTTTGTCGGG  
miR172c-3p 977 AGATATCTTTGACAATGCTGC  
miR3707 21 TTGATCTGCCATTGATTCTTGAA  
miR1130 13 TCTGTAAGTTATATCAAGAG  
miR912 26 TGGATTGATCACCATCCCTGGC  
miR8658 1510 TTGACAAAGTACAGAGACCAT  
miR1051-3p 464 TTCCCGTACTTGAACCCAC  
miR6473 61 TCCACAATGCCAAAGAGTT  
miR2645 52 TTTCTTGAGATGAGCATTTT  
miR5144-3p 203 TACTCACTGCACAGCACAAGAAAG  
miR5557-3p 1395 TGCTTGCATTATCTTGTTGA  
miR6156 2541 TTGAAGAAGTTCTTTGTTTCGT  
miR5798 13 TCTGGACTCAAGAACCCTGGAT  
miR6476a 117 TCGGTAGGTGATGAACATGA  
miR6031 51 AAGAGGTTCCGGAGCGGTTTGAAG  
miR8138 147 TAAAGAGGCAACAAAGGAAG  
miR4221 22 TAAGAGGTTCAAAAGGTAGGAAA  
miR165a-5p 16 GGAATGTTGTCTGGATCGAG  
miR9722 72 TAAAGATGGGAAGATGAAGAA  
miR1057 292 TTCTAGGTTTCTAGCTGGGTGGT  
miR9653a-3p 1645 TTGGGACTTTGGGCTGGCC  
miR5769 134 TGGGGAAGTGGGAAGACGCGA  
miR2091-5p 127 TCTACGAGCCAGCAGGAGGAGG  
miR5227 51 TGAAGAAGAAGAAGTTGAGGAT  
miR400-3p 9 GACTTATAATGATCTCATGA  
miR8581 9 TAGAGAATTTTGTAGACAAGT  
miR9553-3p 27 TAATCATCCCAGCTATGAACAT  
miR5774a 61 CTGGCGTCCGAAGTCTGAGCAT  
miR2916 622 TAGGGGATCGAAGATGATCAGAT

Supplemental Table 2: FGSC-9543 Novel miRNA

>novel\_mir\_128 14333  
TGAGCACCGCACACTTCAGAGG  
>novel\_mir\_39 4333  
TCTTCGGTAGTATAGTGGTGAG  
>novel\_mir\_33 3401  
GGAGGGATGGCCGAGTTGGT  
>novel\_mir\_79 1617  
TGACAATATGGGAGAACTGGCT  
>novel\_mir\_101 2370  
TACCACAATGTCGAGACCATAAG  
>novel\_mir\_22 1144  
TAGCGCCTATTTTCTTTCTCA  
>novel\_mir\_53 1111  
TGCATCGGCTACGTTCTTTTCG  
>novel\_mir\_31 970  
TGTTCTGGGTTTCATGCATAAAG  
>novel\_mir\_119 983  
GGTCTTGTGGTGAATGGTTAAA  
>novel\_mir\_112 597  
TAGTGCTCAGGCCAAAAAGGGA  
>novel\_mir\_37 606  
TGGGAACTCGGGCTTTGGTAGG  
>novel\_mir\_71 391  
TAAAAGAGGACAAGAGAGGGTG  
>novel\_mir\_70 382  
TGGTGGGTTGAAAAGGCTTTGG  
>novel\_mir\_41 231  
TACTTGATAATTGACTGATGTT  
>novel\_mir\_24 259  
TGCGGGTAGCTCTACAGTGGCC  
>novel\_mir\_116 102  
TTGTCCGACGGTCTCAGGTAATT  
>novel\_mir\_108 159  
TATTGCCCGGGTCAGATCAA  
>novel\_mir\_58 43  
TCTACTTTACAAGGTCTGGTGG  
>novel\_mir\_80 79  
TGTAGCTTTTCCTTTGCCTTTG  
>novel\_mir\_78 99  
TAGCGTAAAAGATCGAAAGA  
>novel\_mir\_103 71  
TGTATCGAAGAGGAGGTCGG  
>novel\_mir\_64 60  
TACAAGCAGTCTTAGCAGAAAAG

>novel\_mir\_113 41  
TTAGGGTGGTGTATAAGTCAA  
>novel\_mir\_16 54  
TAGGCACGGTAGTATAACAGTAC  
>novel\_mir\_127 18  
TGCTTGATAAGTAGTGACCACC  
>novel\_mir\_102 46  
TAATACGTTGTATCTTAGCAGG  
>novel\_mir\_117 27  
TAATGGCAGGGATGATAGAAG  
>novel\_mir\_43 17  
TCTTTTCGTTTCTATTTGCTTT  
>novel\_mir\_97 14  
TGCCAAAGTTTGCTGCATTGCG  
>novel\_mir\_121 15  
TGGAGCGGAGAAATTAATGTAT  
>novel\_mir\_42 20  
TTGGTTGCTCTTTGTAAGTC  
>novel\_mir\_18 11  
TGGAGCCAACTGAGATTGAT  
>novel\_mir\_95 18  
TGATGAAGGATAGTGGCATGAT  
>novel\_mir\_13 14  
TACGTTTCAGGTAAGAGAGGA  
>novel\_mir\_19 18  
TGGTCTGTAGGATCGAGTACTA  
>novel\_mir\_28 11  
TAGTGATTGCCTTGTAAGTTGT  
>novel\_mir\_124 8  
TGCTCTTGTTGCTGTTGTTG  
>novel\_mir\_93 9  
TATACAGTGCCTCACAAAACCT  
>novel\_mir\_69 13  
TGATCCTAAACATCGATGAAAGT  
>novel\_mir\_90 15  
TAGTAGCCGCTCTATTTAAGG  
>novel\_mir\_88 13  
TATCACGCGCTCATTGACAAAGT  
>novel\_mir\_52 7  
TGGGGAAGGAGAAGGGGAGGA  
>novel\_mir\_15 10  
TCTCCTTTTTCTTTTTCTTTTC  
>novel\_mir\_67 9  
TACAGCGGCTTCTTTCAGACTT  
>novel\_mir\_122 9

TGCATCTGCTGCTGCTGTTG  
>novel\_mir\_27 9  
TTGCCGAATTCGGATGAGATTG  
>novel\_mir\_5 7  
TACCACTGTTT CAGAAGCATCGCT  
>novel\_mir\_114 5  
TCGTCTGACAGTTGGATTGCTC  
>novel\_mir\_104 6  
CAGGGGGGAAAGGGGGAA  
>novel\_mir\_208 362492  
TCTCCATGTGGTCATCCGCCAT  
>novel\_mir\_141 5715  
TAGACCGAGGCAAGGTGTTGGC  
>novel\_mir\_160 751  
TTTCAAGATCCATTCTATC  
>novel\_mir\_171 345  
TCATTTGGAAAAAAGAGGCG  
>novel\_mir\_199 309  
TATTGGTGCGCATGTTTCGATG  
>novel\_mir\_155 239  
TCAAGGGCCAGACATCTATCGAA  
>novel\_mir\_152 222  
TGAGGAAGTCTAAGGCTGCA  
>novel\_mir\_166 158  
TTCCAAAGTTTCTTCTTGATCAG  
>novel\_mir\_140 116  
TATGCTTGCTAAATTCACGATG  
>novel\_mir\_192 89  
TATGGTATTGCTTGAGGTTATTC  
>novel\_mir\_168 76  
TAGTGACCTTTCATGTGCGG  
>novel\_mir\_183 76  
TACTACAGAACTAGGCCATTGT  
>novel\_mir\_151 69  
ATGCCGTCAAAACTGGTCGCATG  
>novel\_mir\_144 59  
TTACGGTCAACAGTGTCATAAG  
>novel\_mir\_175 58  
TAATAGAAGACTGTAGGAGA  
>novel\_mir\_200 50  
TATGACAACCGTGCTGCCAACG  
>novel\_mir\_203 48  
TGATGCTACGTATGCACTTTTGT  
>novel\_mir\_153 47  
TGTTGCGTTTCACTTTACTTTTG

>novel\_mir\_159 39  
TTAAACGGTTTGTGGCAGAGAC  
>novel\_mir\_193 36  
TGTATGATTTGAAGTCAAGT  
>novel\_mir\_150 28  
TTTGACGGCCACTGTATATTAG  
>novel\_mir\_142 28  
TTCTGCGGTTTATGCTTTCTCA  
>novel\_mir\_167 23  
TAATTGTAAGGCCATATTCTAG  
>novel\_mir\_154 22  
TAGGTTTCATCTGTTGTAGAGAT  
>novel\_mir\_164 21  
TCCAAGTGCAGACGAGCTTTAC  
>novel\_mir\_178 20  
TAATGATATAAAGAAGAGCAAG  
>novel\_mir\_188 19  
TACGCCATTTCTATAGTAG  
>novel\_mir\_185 19  
TTAAAGCTCAATAAAAAAATCCC  
>novel\_mir\_205 17  
TTGAGCTGCAACTTCAATGGAT  
>novel\_mir\_176 15  
TTTCCGGAAATAGATTGCACAA  
>novel\_mir\_202 13  
TAGGCTTCGCCGGGCGAAGGAA  
>novel\_mir\_179 13  
TTCATACGTTAGACTAGCTGTT  
>novel\_mir\_129 13  
TTCGAGCCACGCTTTATTTTCA  
>novel\_mir\_195 12  
TAGACATCATTCGCTCAAAGTG  
>novel\_mir\_161 12  
TATCGTTCCTGTTGTATCCACA  
>novel\_mir\_207 12  
TACTGTGACGCAGTTGGTGTA  
>novel\_mir\_206 12  
TCGTTGTTATACTCTAGATCAA  
>novel\_mir\_177 12  
TTTAATAAGGAAAATACGACATA  
>novel\_mir\_148 12  
TTTTTTTTTTGTGTGTGTGTG  
>novel\_mir\_157 11  
TTATGTGCTAATGAAAGGTGT  
>novel\_mir\_131 11

TCATAACGTTGGCCTTTGTTTCAT  
>novel\_mir\_209 11  
AGAATCTGGGCCTAAAGGTC  
>novel\_mir\_173 11  
TGATCTTGATCGTCCAAATCAAC  
>novel\_mir\_135 10  
TGGTAGATGAAGAATGTTTTTC  
>novel\_mir\_143 10  
TTTAAGTGAACATCCGACAG  
>novel\_mir\_156 9  
TAAAAACAGTAGGAAGTCAATAG  
>novel\_mir\_137 9  
TTGTGAAGGACTGGTCAGGGT  
>novel\_mir\_197 9  
TTGTCCTCTGGTCTAAATAGTAA  
>novel\_mir\_186 8  
TAAAAAAAAAATAAAGGGATCAG  
>novel\_mir\_172 8  
TTTCCAGTATCAGGATGTCT  
>novel\_mir\_165 8  
TGGTGTAGATGTACGTGGTACA  
>novel\_mir\_182 8  
TTAAGGAGAGGTACGACTGGGTG  
>novel\_mir\_190 8  
TGATTTGACATGTATAAGGAA  
>novel\_mir\_184 8  
TTTGACTTTTCTTTAGGGTG  
>novel\_mir\_149 7  
TCGATGCTTTGCTGGTTGCT  
>novel\_mir\_133 7  
TAAACTGATAGAGCTATACTGG  
>novel\_mir\_163 7  
TTGAAAACGGGAGACAGCATGG  
>novel\_mir\_180 7  
CTACAAGGCTGGTTAAATTAT  
>novel\_mir\_198 7  
TGGGAGAGGGGAGGAGGGGG  
>novel\_mir\_130 7  
TTATTTGACTGGCCAATGACAA  
>novel\_mir\_196 7  
TTGATAGACCCTTAGCAACAAGA  
>novel\_mir\_194 7  
TTGTGAGGCACTGTATTGTAGAT  
>novel\_mir\_139 7  
TATATTAACGATTGGCCACCTAA

>novel\_mir\_191 7  
TGGGTGCTTGGGAGAGCAAGGT  
>novel\_mir\_146 6  
TGACACAATAGGCCTCGATCAA  
>novel\_mir\_136 6  
TTGATATGTGCTATGTTGGTCA  
>novel\_mir\_169 6  
TGCTTAAACGGCTGTCAGAGGA  
>novel\_mir\_158 6  
TACACAGGATTTAGTGAACCAG  
>novel\_mir\_145 6  
TTCGTGCGCTGTCCCAGGAAAT  
>novel\_mir\_132 6  
TGGATAGAATGGGACTTTGTAAG  
>novel\_mir\_170 6  
TGACAGTACAAGCTAGGAACAG  
>novel\_mir\_174 5  
TGAAGTGGACTTGATGTTGAAAA  
>novel\_mir\_204 5  
TAGGCTTCACTGGGCGAAGGAA  
>novel\_mir\_189 5  
TCGGATAGCTGAGAAACAGTGG  
>novel\_mir\_201 5  
TAACCGATAAGCTTAGTGAAGAG  
>novel\_mir\_138 5  
TACCACATTTTCAGCCTTCGC  
>novel\_mir\_181 5  
TGGCGCTTTTCTTTTGCAATT  
>novel\_mir\_147 5  
TGAGCTAGATCCAAGGTAGGAC  
>novel\_mir\_162 5  
TAAACATAGTTGGGGAAAACAC  
>novel\_mir\_187 5  
TGACGTAGTTTGGAGGCTGAGG  
>novel\_mir\_134 5  
TAGAGCACTTGGTTTAATTGAC  
CDC-8219 novel miRNA  
>novel\_mir\_128 10596  
TGAGCACCGCACACTTCAGAGG  
>novel\_mir\_39 5349  
TCTTCGGTAGTATAGTGGTGAG  
>novel\_mir\_33 1687  
GGAGGGATGGCCGAGTTGGT  
>novel\_mir\_79 2039  
TGACAATATGGGAGAACTGGCT



>novel\_mir\_101 1264  
TACCACAATGTCGAGACCATAAG  
>novel\_mir\_22 1227  
TAGCGCCTATTTTCTTTCCTCA  
>novel\_mir\_53 748  
TGCATCGGCTACGTTCTTTTCG  
>novel\_mir\_31 517  
TGTTCTGGGTTTCATGCATAAAG  
>novel\_mir\_119 276  
GGTCTTGTGGTGAATGGTTAAA  
>novel\_mir\_112 591  
TAGTGCTCAGGCCAAAAAGGGA  
>novel\_mir\_37 387  
TGGGAACTCGGGCTTTGGTAGG  
>novel\_mir\_71 471  
TAAAAGAGGACAAGAGAGGGTG  
>novel\_mir\_70 317  
TGGTGGGTTGAAAAGGCTTTGG  
>novel\_mir\_41 290  
TACTTGATAATTGACTGATGTT  
>novel\_mir\_24 148  
TGCGGGTAGCTCTACAGTGGCC  
>novel\_mir\_116 104  
TTGTCCGACGGTCTCAGGTAATT  
>novel\_mir\_108 32  
TATTGCCCGGGTCAGATCAA  
>novel\_mir\_58 116  
TCTACTTTACAAGGTCTGGTGG  
>novel\_mir\_80 65  
TG TAGCTTTTCCTTTGCCTTTG  
>novel\_mir\_78 35  
TAGCGTAAAAGATCGAAAGA  
>novel\_mir\_103 49  
TGTATCGAAGAGGAGGTCGG  
>novel\_mir\_64 48  
TACAAGCAGTCTTAGCAGAAAAG  
>novel\_mir\_113 63  
TTAGGGTGGTGTATAAGTCAA  
>novel\_mir\_16 40  
TAGGCACGGTAGTATAACAGTAC  
>novel\_mir\_127 62  
TGCTTGATAAGTAGTGACCACC  
>novel\_mir\_102 24  
TAATACGTTGTATCTTAGCAGG  
>novel\_mir\_117 21

TAATGGCAGGGATGATAGAAG  
>novel\_mir\_43 29  
TCTTTTCGTTTCTATTTGCTTT  
>novel\_mir\_97 27  
TGCCAAAGTTTGCTGCATTGCG  
>novel\_mir\_121 20  
TGGAGCGGAGAAATTAATGTAT  
>novel\_mir\_42 13  
TTGGTTGCTCTTTGTAAGTC  
>novel\_mir\_18 19  
TGGAGCCAACTGAGATTGAT  
>novel\_mir\_95 11  
TGATGAAGGATAGTGGCATGAT  
>novel\_mir\_13 14  
TACGTTTCAGGTAAGAGAGGA  
>novel\_mir\_19 9  
TGGTCTGTAGGATCGAGACTA  
>novel\_mir\_28 15  
TAGTGATTGCCTTGTAAGTTGT  
>novel\_mir\_124 15  
TGCTCTTGTTGCTGTTGTTG  
>novel\_mir\_93 12  
TATACAGTGCCTCACAAAACCT  
>novel\_mir\_69 7  
TGATCCTAAACATCGATGAAAGT  
>novel\_mir\_90 5  
TAGTAGCCGCTCTATTTAAGG  
>novel\_mir\_88 6  
TATCACGCGCTCATTGACAAAGT  
>novel\_mir\_52 11  
TGGGGAAGGAGAAGGGGAGGA  
>novel\_mir\_15 6  
TCTCCTTTTTCTTTTTCTTTTC  
>novel\_mir\_67 7  
TACAGCGGCTTCTTTCAGACTT  
>novel\_mir\_122 6  
TGCATCTGCTGCTGCTGTTG  
>novel\_mir\_27 5  
TTGCCGAATTCGGATGAGATTG  
>novel\_mir\_5 6  
TACCACTGTTTACAAGCATCGCT  
>novel\_mir\_114 6  
TCGTCTGACAGTTGGATTGCTC  
>novel\_mir\_104 5  
CAGGGGGGAAAGGGGGAA

>novel\_mir\_85 3409  
TGGATCCGATGTGGTTTGAGGC  
>novel\_mir\_40 829  
TCATTTGTCGGGTATCGCTGAT  
>novel\_mir\_107 462  
TGGACCTGAGTATGCTTGTGGA  
>novel\_mir\_62 370  
TGATGTAGCCTAATGATTGA  
>novel\_mir\_68 344  
TAGAAGGAGCTGACCATGTGGA  
>novel\_mir\_12 269  
TGCACCGCTTGTGTTTTGATTCCC  
>novel\_mir\_3 196  
TGAAGTCCCCTGCTATGAAGAGA  
>novel\_mir\_47 195  
TCAAGGGCCAGACATCTATCGA  
>novel\_mir\_110 141  
TGATAGGGTACTTGGATGATGT  
>novel\_mir\_46 99  
TTGTGCTGAGTGCTGATTGGAG  
>novel\_mir\_54 88  
TGTGAATGAATGTAAACCGA  
>novel\_mir\_38 87  
TGTTATTGATGTCCAGTCTACG  
>novel\_mir\_21 65  
TGGTCTAAATTGCGTCTTCCGC  
>novel\_mir\_51 61  
TAAACGGTTTGTGGCAGAGACA  
>novel\_mir\_73 60  
TAGTGACCTTTCATGTGCGGAT  
>novel\_mir\_105 55  
TGGGCAAGACTGGATGATGAGT  
>novel\_mir\_56 51  
TTGGAGGCCGGAGTGAAGTCAA  
>novel\_mir\_17 44  
TACGGTCAACAGTGCATAAGC  
>novel\_mir\_32 39  
TGACGACGATTTGCTTGATGAT  
>novel\_mir\_2 30  
TTTCAGACTCTTCTTCGCCAAC  
>novel\_mir\_118 29  
TAGAAATGAGTTGAGGCCGTGA  
>novel\_mir\_9 27  
TATAGGGTCAGCTATTGCTTCA  
>novel\_mir\_96 26

TGGTTGTTCTATATTCTTGAAG  
>novel\_mir\_125 26  
TCTCTCTTGGGAGCAAGTCCGC  
>novel\_mir\_25 25  
TAATACGTTACTCATTTC AATTC  
>novel\_mir\_14 19  
TAATAAAAAAGAACACGTG TACT  
>novel\_mir\_123 18  
TGAGCTGCAACTTCAATGG AT  
>novel\_mir\_83 18  
TGAAGAAGAAGATAGCGCG TATA  
>novel\_mir\_8 18  
TTTATAACGCGACATTACT TTC  
>novel\_mir\_72 17  
TAGCTAGAAGATGATTGTGA AG  
>novel\_mir\_111 17  
TATTGAGTGAGTGGTTTGAT AT  
>novel\_mir\_44 16  
TGAGCCAATGTTTGTTTACGCC  
>novel\_mir\_84 15  
TCACTTTCTGCGGTTTATGCT T  
>novel\_mir\_77 14  
TTAAGTGA ACTCATCCGACAGG  
>novel\_mir\_23 14  
TAGAGGACCATTGTTCGTAGTAA  
>novel\_mir\_30 14  
TAAGTGA ACTCATCCGACAGGTG  
>novel\_mir\_98 12  
TGACAAAGGATAGTTACGACCG  
>novel\_mir\_74 12  
TAGTGGACGAGTGTAGACGATA  
>novel\_mir\_87 12  
TGGTTCGTATATAACAAGGTGCA  
>novel\_mir\_29 11  
TATCCCAGATCAGTTAAAG  
>novel\_mir\_7 11  
TGAGGATGTTTTTGGGGAGGAG  
>novel\_mir\_86 11  
TTTATTGTGGCACAGACAGTCAA  
>novel\_mir\_36 10  
TGTTTAAAGTATGTTGGAAT  
>novel\_mir\_10 10  
TACCACATTTTCAGCCTTCG  
>novel\_mir\_100 10  
TTGAACGAGGAAGTTTTGTTG

>novel\_mir\_65 10  
TATTGTTGAGTCTTCCGCTGAAA  
>novel\_mir\_126 10  
TACTGTGACGCAGTTGGTGTA  
>novel\_mir\_49 10  
TAGTCGTTGGTGCATGTGTAGG  
>novel\_mir\_120 10  
TATATGGAAGACTACAGCATTG  
>novel\_mir\_106 9  
TGAATTAGGTTCAACATTATGTT  
>novel\_mir\_99 9  
TTCGTCGATTATTGGATATGGG  
>novel\_mir\_115 9  
TACAACACTCGCGACATGTACA  
>novel\_mir\_94 9  
TGAAGGAACTTGCTAAATTT  
>novel\_mir\_66 8  
TATTGGAATATTCTGGAGTGGA  
>novel\_mir\_55 8  
TAGAGAGAGCAGCACAGAAG  
>novel\_mir\_81 8  
TATCGCTTTGGTCATTTAATACA  
>novel\_mir\_82 8  
TATATACAGTAGGTCACAAAAC  
>novel\_mir\_61 8  
TAGTGGCCTTTCATATTCGG  
>novel\_mir\_4 8  
TAATAAAAAAGTTAAGAGCAAG  
>novel\_mir\_63 7  
TAGTGGAGAAAAGTGTATTCG  
>novel\_mir\_45 7  
TGGCTGATTGTATTTTTTAAATT  
>novel\_mir\_91 7  
TGCGCCTTTGGACAAATTATGTT  
>novel\_mir\_48 7  
TGAAGAAGATAATTAGAGAGGAT  
>novel\_mir\_1 7  
TGCGGCCGATAAATATTGTCAT  
>novel\_mir\_109 7  
TATAGTCAACACCATACCATGCT  
>novel\_mir\_75 6  
TGGCTTATGAATGTATTGGATT  
>novel\_mir\_20 6  
TCCTGGCCTTCTTAGATATCAAA  
>novel\_mir\_92 6

TGCTTGGAAAATTGCATCGACA  
>novel\_mir\_34 6  
TATACAGTGACCCACAAAATTGT  
>novel\_mir\_11 6  
TGTTGTTCTTTAACTGATCTGGG  
>novel\_mir\_6 6  
TAGAAACAAAGATCGAGAAACA  
>novel\_mir\_60 6  
TGTCTGGTGCAGATGTTGACGA  
>novel\_mir\_89 6  
TGATGTGGGGGTGCATGACGTT  
>novel\_mir\_35 6  
TGAAAACTAGTGAATGAGTCT  
>novel\_mir\_26 6  
TGCGAGCTGTGAACATGAGTTT  
>novel\_mir\_50 5  
TTGCCATGTAGGAAGATCATT  
>novel\_mir\_57 5  
TTATCTATTTGTCATCAGCTAG  
>novel\_mir\_59 5  
TCGTTCCCTAAATCAATCTCA  
>novel\_mir\_76 5  
TTGCTCAATTGGATTCAGTT

Supplemental Table 3: FGSC-9543 known miRNA Target (TargetFinder)

| #miRNA           | mRNA               | Score    | Match_pos      | Strand | Pairing | target and miRNA |
|------------------|--------------------|----------|----------------|--------|---------|------------------|
| query=miR1160.1, | target=R03G_17276, | score=0, | range=918-939, | stran  |         |                  |
| target 5'        | GGCCAUGC           | UUAAAA   | AAGAGGGAA      | 3'     |         |                  |
| query 3'         | CCGGUACG           | AUUUUU   | UCUCCCUU       | 5'     |         |                  |
| query=miR1160.1, | target=R03G_13270, | score=0, | range=828-849, | stran  |         |                  |
| target 5'        | GGCCAUGC           | UUAAAA   | AAGAGGGAA      | 3'     |         |                  |
| query 3'         | CCGGUACG           | AUUUUU   | UCUCCCUU       | 5'     |         |                  |
| query=miR1160.1, | target=R03G_10774, | score=0, | range=795-816, | stran  |         |                  |
| target 5'        | GGCCAUGC           | UUAAAA   | AAGAGGGAA      | 3'     |         |                  |
| query 3'         | CCGGUACG           | AUUUUU   | UCUCCCUU       | 5'     |         |                  |
| query=miR1160.1, | target=R03G_13863, | score=0, | range=528-549, | stran  |         |                  |
| target 5'        | GGCCAUGC           | UUAAAA   | AAGAGGGAA      | 3'     |         |                  |
| query 3'         | CCGGUACG           | AUUUUU   | UCUCCCUU       | 5'     |         |                  |
| query=miR1160.1, | target=R03G_05935, | score=0, | range=234-255, | stran  |         |                  |
| target 5'        | GGCCAUGC           | UUAAAA   | AAGAGGGAA      | 3'     |         |                  |
| query 3'         | CCGGUACG           | AUUUUU   | UCUCCCUU       | 5'     |         |                  |
| query=miR1160.1, | target=R03G_03626, | score=0, | range=234-255, | stran  |         |                  |
| target 5'        | GGCCAUGC           | UUAAAA   | AAGAGGGAA      | 3'     |         |                  |
| query 3'         | CCGGUACG           | AUUUUU   | UCUCCCUU       | 5'     |         |                  |
| query=miR1160.1, | target=R03G_03593, | score=0, | range=234-255, | stran  |         |                  |
| target 5'        | GGCCAUGC           | UUAAAA   | AAGAGGGAA      | 3'     |         |                  |
| query 3'         | CCGGUACG           | AUUUUU   | UCUCCCUU       | 5'     |         |                  |
| query=miR1160.1, | target=R03G_04790, | score=0, | range=234-255, | stran  |         |                  |
| target 5'        | GGCCAUGC           | UUAAAA   | AAGAGGGAA      | 3'     |         |                  |
| query 3'         | CCGGUACG           | AUUUUU   | UCUCCCUU       | 5'     |         |                  |
| query=miR1160.1, | target=R03G_00678, | score=0, | range=198-219, | stran  |         |                  |
| target 5'        | GGCCAUGC           | UUAAAA   | AAGAGGGAA      | 3'     |         |                  |
| query 3'         | CCGGUACG           | AUUUUU   | UCUCCCUU       | 5'     |         |                  |
| query=miR1160.1, | target=R03G_11527, | score=0, | range=234-255, | stran  |         |                  |
| target 5'        | GGCCAUGC           | UUAAAA   | AAGAGGGAA      | 3'     |         |                  |
| query 3'         | CCGGUACG           | AUUUUU   | UCUCCCUU       | 5'     |         |                  |
| query=miR1160.1, | target=R03G_10869, | score=0, | range=234-255, | stran  |         |                  |
| target 5'        | GGCCAUGC           | UUAAAA   | AAGAGGGAA      | 3'     |         |                  |

query 3' CCGGUACGAAUUUUUCUCCCUU 5'  
query=miR1160.1, target=R03G\_01589, score=0.5, range=234-255, str  
target 5' GGUCAUGCUUAAAAAGAGGGAA 3'  
query 3' CCGGUACGAAUUUUUCUCCCUU 5'  
query=miR1160.1, target=R03G\_17249, score=1, range=753-774, stran  
target 5' GGCCAUGCUUAAAAAGAGGGGA 3'  
query 3' CCGGUACGAAUUUUUCUCCCUU 5'  
query=miR1160.1, target=R03G\_14363, score=1, range=786-807, stran  
target 5' GACCAUGCUUAAAAAGAGGGAA 3'  
query 3' CCGGUACGAAUUUUUCUCCCUU 5'  
query=miR1160.1, target=R03G\_14547, score=1, range=234-255, stran  
target 5' GACCAUGCUUAAAAAGAGGGAA 3'  
query 3' CCGGUACGAAUUUUUCUCCCUU 5'  
query=miR1160.1, target=R03G\_10734, score=2, range=234-255, stran  
target 5' GGCCAUGCUUAAAAAGAUGGAA 3'  
query 3' CCGGUACGAAUUUUUCUCCCUU 5'  
query=miR1160.1, target=R03G\_17459, score=2, range=234-255, stran  
target 5' GGCCAUGCUUAAAAAGAUGGAA 3'  
query 3' CCGGUACGAAUUUUUCUCCCUU 5'  
query=miR1160.1, target=R03G\_05134, score=3.5, range=1120-1141,  
strand=-1  
target 5' UGCCAUCCUAAAAGAGAGGGAG 3'  
query 3' CCGGUACGAAUUUUUCUCCCUU 5'  
query=miR1160.1, target=R03G\_05127, score=3.5, range=1120-1141,  
strand=-1  
target 5' UGCCAUCCUAAAAGAGAGGGAG 3'  
query 3' CCGGUACGAAUUUUUCUCCCUU 5'  
query=miR5281b, target=R03G\_17117, score=2.5, range=665-684, stra  
target 5' CUUCAGUCCUUUUUAUUAAAA 3'  
query 3' GAGGCAAGGAAAAUAAUUUU 5'  
query=miR5281b, target=R03G\_08187, score=3, range=1247-1267, stra  
target 5' CUCCCGAUCCUUUUUAUUGAAA 3'  
query 3' GA-GGCAAGGAAAAUAAUUUU 5'  
query=miR5281b, target=R03G\_08154, score=3, range=18-37, strand=-



target 5' AUCCUUUUCUUUUUAUUAAAA 3'  
::: ::::::::::::::::::::  
query 3' GAGGCAAGGAAAAUAAUUUU 5'  
query=miR5281b, target=R03G\_04365, score=3, range=431-450, strand  
target 5' AUCCAUUUCUUUUUAUUAAAA 3'  
::: ::::::::::::::::::::  
query 3' GAGGCAAGGAAAAUAAUUUU 5'  
query=miR5281b, target=R03G\_08298, score=3, range=999-1017, stran  
target 5' CUCC-UUCUUUUUAUUAAAC 3'  
:::: ::::::::::::::::::::  
query 3' GAGGCAAGGAAAAUAAUUUU 5'  
query=miR5281b, target=R03G\_00916, score=4, range=858-876, strand  
target 5' CUUU-UUUCUUUUUAUUGAAA 3'  
:..: ::::::::::::::::::::  
query 3' GAGGCAAGGAAAAUAAUUUU 5'  
query=miR5281b, target=R03G\_10068, score=4, range=246-265, strand  
target 5' CUUAGUCCUUUUUAUUAAUG 3'  
::: ::::::::::::::::::::  
query 3' GAGGCAAGGAAAAUAAUUUU 5'  
query=miR5281b, target=R03G\_05529, score=4, range=160-180, strand  
target 5' AUCCGAUCCUUUUACUAAAA 3'  
:::: ::::::::::::::::::::  
query 3' GAGGC-AAGGAAAAUAAUUUU 5'  
query=miR5281b, target=R03G\_13391, score=4, range=444-463, strand  
target 5' GUCCUUUCUUUUUAUUGAAA 3'  
::: ::::::::::::::::::::  
query 3' GAGGCAAGGAAAAUAAUUUU 5'  
query=miR5281b, target=R03G\_05662, score=4, range=78-97, strand=-  
target 5' UUGUGUUUCUUUUUAUUAAA 3'  
.: ::::::::::::::::::::  
query 3' GAGGCAAGGAAAAUAAUUUU 5'  
query=miR5281b, target=R03G\_14434, score=4, range=365-384, strand  
target 5' UUCAGUCCUUCUAUUAAAG 3'  
.:: ::::::::::::::::::::  
query 3' GAGGCAAGGAAAAUAAUUUU 5'  
query=miR5281b, target=R03G\_12911, score=4, range=1322-1342, stra  
target 5' AUCCGAUCCUUUUACUAAAA 3'  
:::: ::::::::::::::::::::  
query 3' GAGGC-AAGGAAAAUAAUUUU 5'  
query=miR5281b, target=R03G\_12128, score=4, range=998-1017, stran  
target 5' CUCCUCUUCUUUUUAUUAAA 3'  
:::: ::::::::::::::::::::  
query 3' GAGGCAAGGAAAAUAAUUUU 5'  
query=miR5042-3p, target=R03G\_16914, score=2, range=3215-3234,  
strand=-1

```
target 5' CCUUCUUGUACUCAAGUCCU 3'
::::::::::::::::::::::::::::
query 3' GGAAGAACAUGAGUUCGGGU 5'
query=miR5042-3p, target=R03G_15166, score=3, range=484-503, stra
target 5' CCUUCUUGUACCCAAGUCCA 3'
:::::::::::: ::::::::::
query 3' GGAAGAACAUGAGUUCGGGU 5'
query=miR5042-3p, target=R03G_02218, score=4, range=377-395, stra
target 5' CCAUC-UGUACUCAAGCCUU 3'
:: :: ::::::::::::::.
query 3' GGAAGAACAUGAGUUCGGGU 5'
query=miR8632, target=R03G_19000, score=0, range=450-468, strand=
target 5' GGUUCCAACUUUGAGCUCU 3'
:::::::::::::::::::::
query 3' CCAAGGUUGAAACUCGAGA 5'
query=miR8632, target=R03G_19002, score=0, range=450-468, strand=
target 5' GGUUCCAACUUUGAGCUCU 3'
:::::::::::::::::::::
query 3' CCAAGGUUGAAACUCGAGA 5'
query=miR8632, target=R03G_15016, score=3, range=2706-2723, stran
target 5' GGUUCCAA-UUUGAGUUCU 3'
::::::: ::::::::::::::
query 3' CCAAGGUUGAAACUCGAGA 5'
query=miR8632, target=R03G_04352, score=3, range=1925-1943, stran
target 5' GAUUCAACUUUGAGCUCG 3'
: ::: ::::::::::::::
query 3' CCAAGGUUGAAACUCGAGA 5'
query=miR8632, target=R03G_15392, score=3.5, range=2639-2657,
strand=-1
target 5' GGUUCUAACUUUAAGCUCA 3'
::::::::::: ::::::
query 3' CCAAGGUUGAAACUCGAGA 5'
query=miR8632, target=R03G_03452, score=4, range=757-774, strand=
target 5' GAUUCCAACUUUGA-CUUU 3'
: :::::::::::::: :::
query 3' CCAAGGUUGAAACUCGAGA 5'
query=miR8632, target=R03G_12046, score=4, range=775-792, strand=
target 5' GGUUCCAG-UUUGAGUUCU 3'
::::::::::: ::::::::::::::
query 3' CCAAGGUUGAAACUCGAGA 5'
query=miR8632, target=R03G_00895, score=4, range=1416-1433, stran
target 5' AGUUCCAACUUUGAGCUUU 3'
::::::::::: :::::::::::::::
query 3' CCAAGGUUGAAACUCGAGA 5'
query=miR8632, target=R03G_06934, score=4, range=1429-1448, stran
```

target 5' UGUACACGACUUUGAGCUCU 3'  
:: : :::::::::::::::  
query 3' CCAAG-GUUGAAACUCGAGA 5'  
query=miR5565e, target=R03G\_16107, score=0, range=527-547, strand  
target 5' UCCGACAACAUCUAGACCAUA 3'  
:::::::::::::::::::  
query 3' AGGCUGUUGUAGAUCUGGUUAU 5'  
query=miR5565e, target=R03G\_09773, score=4, range=571-590, strand  
target 5' UCCGAUAAC-UCUGGACCAUG 3'  
:::::::::: : ::::::::::.  
query 3' AGGCUGUUGUAGAUCUGGUUAU 5'  
query=miR5565e, target=R03G\_14812, score=4, range=115-134, strand  
target 5' UCC-ACAACAUCUAAAUCAUA 3'  
::: ::::::::::: : ::::::  
query 3' AGGCUGUUGUAGAUCUGGUUAU 5'  
query=miR3711, target=R03G\_09910, score=3, range=704-724, strand=  
target 5' GGCAGCUUCCUUCUUGGCUU 3'  
.:::: : :::::::::::::::  
query 3' UCCGU-GGAGGAAGAACCGAU 5'  
query=miR3711, target=R03G\_01286, score=3.5, range=121-140, stran  
target 5' AUGCGCAUCCUUCUUGGCUU 3'  
: :::: : :::::::::::::::  
query 3' UCCGUGGAGGAAGAACCGAU 5'  
query=miR3711, target=R03G\_13432, score=4, range=548-567, strand=  
target 5' AGGCAUCAUCUUCUUGGCUG 3'  
:::::::::: : ::::::::::::::.  
query 3' UCCGUGGAGGAAGAACCGAU 5'  
query=miR3711, target=R03G\_11375, score=4, range=1394-1413, stran  
target 5' GGCCAUCUGCUUCUUGGUUA 3'  
.:::::::::: : :::::::::::::::  
query 3' UCCGUGGAGGAAGAACCGAU 5'  
query=miR3711, target=R03G\_11895, score=4, range=983-1003, strand  
target 5' AUGCAACUCCUUCUUGGCUG 3'  
: :: : ::::::::::::::::::::.  
query 3' UCCG-UGGAGGAAGAACCGAU 5'  
query=miR3711, target=R03G\_03385, score=4, range=1172-1192, stran  
target 5' AGGCGUCUUCUUCUUGAGCUA 3'  
::::::::::: : ::::::  
query 3' UCCGUGGAGGAAGAAC-CGAU 5'  
query=miR3711, target=R03G\_11900, score=4, range=1400-1420, stran  
target 5' AGGCGGCUUCCUUCUUGGCAA 3'  
:::: : ::::::::::::::: :  
query 3' UCCG-UGGAGGAAGAACCGAU 5'  
query=miR3711, target=R03G\_15319, score=4, range=1145-1165, stran  
target 5' AGUUAUCUCCUUCUUGGCUA 3'

```
:: ..... : : : : :
query 3' UCCGUGGAGGAAG-AACCGAU 5'
query=miR3711, target=R03G_04341, score=4, range=643-661, strand=
target 5' AUGU-CCUCCUUCUUGGUUG 3'
: . : : : : : : : :
query 3' UCCGUGGAGGAAGAACCGAU 5'
query=miR170-3p, target=R03G_11045, score=3.5, range=302-319, str
target 5' AAUUUUUAUAUGGCCAAUG 3'
::: : : : : : : : :
query 3' UUAUAAUGUGCCGGUUAU 5'
query=miR170-3p, target=R03G_10275, score=3.5, range=207-224, str
target 5' AGCAUUAUACGGCCAAUC 3'
:. : : : : : : : :
query 3' UUAUAAUGUGCCGGUUAU 5'
query=miR170-3p, target=R03G_10916, score=3.5, range=355-371, str
target 5' GAUAUU-CACGGUCAUA 3'
. : : : : : : : :
query 3' UUAUAAUGUGCCGGUUAU 5'
query=miR170-3p, target=R03G_16278, score=3.5, range=151-167, str
target 5' GAUAUU-CACGGCCAAUU 3'
. : : : : : : : :
query 3' UUAUAAUGUGCCGGUUAU 5'
query=miR170-3p, target=R03G_13560, score=3.5, range=81-98, stran
target 5' AAUGUUGUACGGCCAGUA 3'
: : : : : : : : :
query 3' UUAUAAUGUGCCGGUUAU 5'
query=miR170-3p, target=R03G_08726, score=3.5, range=148-164,
strand=-1
target 5' AAUG-UAUAUGGCCAAUA 3'
: : : . : : : : : : : :
query 3' UUAUAAUGUGCCGGUUAU 5'
query=miR170-3p, target=R03G_05589, score=3.5, range=3347-3364,
strand=-1
target 5' AGCGAUACACGGCCAAUG 3'
: . . : : : : : : :
query 3' UUAUAAUGUGCCGGUUAU 5'
query=miR170-3p, target=R03G_02520, score=4, range=710-726, stran
target 5' AAUAUUACAUGG-CAGUA 3'
: : : : : : : : : : : : :
query 3' UUAUAAUGUGCCGGUUAU 5'
query=miR170-3p, target=R03G_11165, score=4, range=4930-4946, str
target 5' AAU-UUACCUGGCCAAUA 3'
: : : : : : : : : :
query 3' UUAUAAUGUGCCGGUUAU 5'
query=miR170-3p, target=R03G_12187, score=4, range=148-164, stran
```

target 5' CAU-UUACACGGCCAACA 3'  
 :: : : : : : : : : : : : : : : : :  
 query 3' UUAUAAUGUGCCGGUUAU 5'  
 query=miR170-3p, target=R03G\_14986, score=4, range=148-164, stran  
 target 5' CAU-UUACACGGCCAACA 3'  
 :: : : : : : : : : : : : : : : : :  
 query 3' UUAUAAUGUGCCGGUUAU 5'  
 query=miR170-3p, target=R03G\_13154, score=4, range=148-164, stran  
 target 5' CAU-UUACACGGCCAACA 3'  
 :: : : : : : : : : : : : : : : : :  
 query 3' UUAUAAUGUGCCGGUUAU 5'  
 query=miR170-3p, target=R03G\_04209, score=4, range=148-164, stran  
 target 5' CAU-UUACACGGCCAACA 3'  
 :: : : : : : : : : : : : : : : : :  
 query 3' UUAUAAUGUGCCGGUUAU 5'  
 query=miR170-3p, target=R03G\_02823, score=4, range=148-164, stran  
 target 5' CAU-UUACACGGCCAACA 3'  
 :: : : : : : : : : : : : : : : : :  
 query 3' UUAUAAUGUGCCGGUUAU 5'  
 query=miR170-3p, target=R03G\_04693, score=4, range=148-164, stran  
 target 5' CAU-UUACACGGCCAACA 3'  
 :: : : : : : : : : : : : : : : : :  
 query 3' UUAUAAUGUGCCGGUUAU 5'  
 query=miR170-3p, target=R03G\_03610, score=4, range=148-164, stran  
 target 5' CAU-UUACACGGCCAACA 3'  
 :: : : : : : : : : : : : : : : : :  
 query 3' UUAUAAUGUGCCGGUUAU 5'  
 query=miR170-3p, target=R03G\_14766, score=4, range=148-164, stran  
 target 5' CAU-UUACACGGCCAACA 3'  
 :: : : : : : : : : : : : : : : : :  
 query 3' UUAUAAUGUGCCGGUUAU 5'  
 query=miR170-3p, target=R03G\_13188, score=4, range=33-50, strand=  
 target 5' AAUACAAUACGGCCAUA 3'  
 : : : : : : : : : : : : : : : : :  
 query 3' UUAUAAUGUGCCGGUUAU 5'  
 query=miR170-3p, target=R03G\_10288, score=4, range=4156-4172,  
 strand=-1  
 target 5' ACUAAUACACGGUC-AUA 3'  
 : : : : : : : : : : : : : : : : :  
 query 3' UUAUAAUGUGCCGGUUAU 5'  
 query=miR170-3p, target=R03G\_01343, score=4, range=723-741, stran  
 target 5' AAUCUUACCACGGUCAUA 3'  
 : : : : : : : : : : : : : : : : :  
 query 3' UUAUAAU-GUGCCGGUUAU 5'  
 query=miR2275b-3p, target=R03G\_06738, score=0, range=92-114, stra

target 5' UAGAUUUACGAUGGAAACUUGAA 3'  
:: ::::::::::::::::::::::::::::  
query 3' AUCUAAAUGCUACCUUUGAACUU 5'  
query=miR2275b-3p, target=R03G\_08840, score=1, range=248-270,  
strand=-1  
target 5' UAAAUUUACGAUGGAAACUUGAA 3'  
:: ::::::::::::::::::::::::::::  
query 3' AUCUAAAUGCUACCUUUGAACUU 5'  
query=miR2275b-3p, target=R03G\_17208, score=1, range=242-264,  
strand=-1  
target 5' UAAAUUUACGAUGGAAACUUGAA 3'  
:: ::::::::::::::::::::::::::::  
query 3' AUCUAAAUGCUACCUUUGAACUU 5'  
query=miR2275b-3p, target=R03G\_00297, score=1, range=92-114, stra  
target 5' UAAAUUUACGAUGGAAACUUGAA 3'  
:: ::::::::::::::::::::::::::::  
query 3' AUCUAAAUGCUACCUUUGAACUU 5'  
query=miR2275b-3p, target=R03G\_05518, score=1, range=11-33, stran  
target 5' UAAAUUUACGAUGGAAACUUGAA 3'  
:: ::::::::::::::::::::::::::::  
query 3' AUCUAAAUGCUACCUUUGAACUU 5'  
query=miR2275b-3p, target=R03G\_16695, score=1, range=20-42, stran  
target 5' UAAAUUUACGAUGGAAACUUGAA 3'  
:: ::::::::::::::::::::::::::::  
query 3' AUCUAAAUGCUACCUUUGAACUU 5'  
query=miR2275b-3p, target=R03G\_09543, score=1, range=149-171,  
strand=-1  
target 5' UAAAUUUACGAUGGAAACUUGAA 3'  
:: ::::::::::::::::::::::::::::  
query 3' AUCUAAAUGCUACCUUUGAACUU 5'  
query=miR2275b-3p, target=R03G\_16701, score=1.5, range=284-306,  
strand=-1  
target 5' UAAGUUUACGAUGGAAACUUGAA 3'  
:: .::::::::::::::::::::::::::  
query 3' AUCUAAAUGCUACCUUUGAACUU 5'  
query=miR2275b-3p, target=R03G\_07703, score=1.5, range=248-270,  
strand=-1  
target 5' UAAGUUUACGAUGGAAACUUGAA 3'  
:: .::::::::::::::::::::::::::  
query 3' AUCUAAAUGCUACCUUUGAACUU 5'  
query=miR2275b-3p, target=R03G\_11277, score=2, range=92-114, stra  
target 5' UAAAUUUACGAUGGAAAGCUUGAA 3'  
:: ::::::::::::::::::::::::::::  
query 3' AUCUAAAUGCUACCUUUGAACUU 5'  
query=miR2275b-3p, target=R03G\_13759, score=2, range=92-114, stra

target 5' UAAAUUUACGAUGGAAAGCUUGAA 3'  
:: :::::::::::::::::::::  
query 3' AUCUAAAUGCUACCUUUGAACUU 5'  
query=miR2275b-3p, target=R03G\_17364, score=3.5, range=248-270,  
strand=-1  
target 5' UACAUUUGCGAUGGAAACUUGUA 3'  
:: :::::::::::::::::::::  
query 3' AUCUAAAUGCUACCUUUGAACUU 5'  
query=miR2275b-3p, target=R03G\_10037, score=4, range=233-255,  
strand=-1  
target 5' UAGAUUUACGAUGGAAAGUUGUA 3'  
:::::::::::::::::: :  
query 3' AUCUAAAUGCUACCUUUGAACUU 5'  
query=miR2275b-3p, target=R03G\_14999, score=4, range=92-114, stra  
target 5' UAGAUUUACGAUGGAAAGUUGUA 3'  
:::::::::::::::::: :  
query 3' AUCUAAAUGCUACCUUUGAACUU 5'  
query=miR2275b-3p, target=R03G\_14360, score=4, range=92-114, stra  
target 5' UAGAUUUACGAUGGAAAGUUGUA 3'  
:::::::::::::::::: :  
query 3' AUCUAAAUGCUACCUUUGAACUU 5'  
query=miR2275b-3p, target=R03G\_07680, score=4, range=92-114, stra  
target 5' UAGAUUUACGAUGGAAAGUUGUA 3'  
:::::::::::::::::: :  
query 3' AUCUAAAUGCUACCUUUGAACUU 5'  
query=miR2275b-3p, target=R03G\_15156, score=4, range=92-114, stra  
target 5' UAGAUUUACGAUGGAAAGUUGUA 3'  
:::::::::::::::::: :  
query 3' AUCUAAAUGCUACCUUUGAACUU 5'  
query=miR2275b-3p, target=R03G\_01202, score=4, range=92-114, stra  
target 5' UAGAUUUACGAUGGAAAGUUGUA 3'  
:::::::::::::::::: :  
query 3' AUCUAAAUGCUACCUUUGAACUU 5'  
query=miR2275b-3p, target=R03G\_14973, score=4, range=92-114, stra  
target 5' UAGAUUUACGAUGGAAAGUUGUA 3'  
:::::::::::::::::: :  
query 3' AUCUAAAUGCUACCUUUGAACUU 5'  
query=miR2275b-3p, target=R03G\_04687, score=4, range=92-114, stra  
target 5' UAGAUUUACGAUGGAAAGUUGUA 3'  
:::::::::::::::::: :  
query 3' AUCUAAAUGCUACCUUUGAACUU 5'  
query=miR2275b-3p, target=R03G\_14985, score=4, range=92-114, stra  
target 5' UAGAUUUACGAUGGAAAGUUGUA 3'  
:::::::::::::::::: :  
query 3' AUCUAAAUGCUACCUUUGAACUU 5'

query=miR2275b-3p, target=R03G\_17237, score=4, range=92-114, stra  
target 5' UAGAUUUACGAUGGAAAGUUGUA 3'  
::: :  
query 3' AUCUAAAUGCUACCUUUGAACUU 5'  
query=miR5743a, target=R03G\_08617, score=0, range=281-300, strand  
target 5' AAUGGUGGGAAAACUUCUCA 3'  
::: :  
query 3' UUACCACCCUUUUGAAGAGU 5'  
query=miR5743a, target=R03G\_03516, score=1, range=1616-1635, stra  
target 5' AAUGGUGGGAAAACUUCUCA 3'  
::: :  
query 3' UUACCACCCUUUUGAAGAGU 5'  
query=miR159g-3p, target=R03G\_10142, score=1, range=579-598, stra  
target 5' UCAAAUCGCUUCACUUCAAA 3'  
::: :  
query 3' AGUUUAGCGAAGUGAGGUUU 5'  
query=miR159g-3p, target=R03G\_03107, score=1, range=579-598, stra  
target 5' UCAAAUCGCUUCACUUCAAA 3'  
::: :  
query 3' AGUUUAGCGAAGUGAGGUUU 5'  
query=miR159g-3p, target=R03G\_06108, score=3, range=731-751, stra  
target 5' UCAAAACGCUUCACAUCCAAA 3'  
:::: :  
query 3' AGUUUAGCGAAGUG-AGGUUU 5'  
query=miR159g-3p, target=R03G\_03964, score=3, range=7600-7620,  
strand=-1  
target 5' UCCAAUCAGCUUCACUUCAAA 3'  
:: :  
query 3' AGUUUAG-CGAAGUGAGGUUU 5'  
query=miR159g-3p, target=R03G\_01135, score=3.5, range=1733-1753,  
strand=1  
target 5' CCAAGUCUGCUUCACUUCAAA 3'  
:::: :  
query 3' AGUUUAG-CGAAGUGAGGUUU 5'  
query=miR159g-3p, target=R03G\_04971, score=3.5, range=605-625,  
strand=1  
target 5' UCAAGUCGCUUCACUCCAAU 3'  
:::: :  
query 3' AGUUUAGCG-AAGUGAGGUUU 5'  
query=miR159g-3p, target=R03G\_08468, score=3.5, range=493-512,  
strand=-1  
target 5' ACAGGUUGCUUCAUUCCTAAA 3'  
:::: :  
query 3' AGUUUAGCGAAGUGAGGUUU 5'  
query=miR159g-3p, target=R03G\_02881, score=4, range=3815-3834,



```

strand=1
target 5' UCAAUUCUCUUUUAUCCAAA 3'
::::: : : : : : : : : :
query 3' AGUUUAGCGAAGUGAGGUUU 5'
query=miR159g-3p, target=R03G_02867, score=4, range=507-526, stra
target 5' UCAAUUCGCUUCCUUUCAA 3'
::::: : : : : : : : : :
query 3' AGUUUAGCGAAGUGAGGUUU 5'
query=miR159g-3p, target=R03G_15320, score=4, range=218-238, stra
target 5' UUGAAUCUGCUUCCCUCCAAA 3'
..... : : : : : : : : : :
query 3' AGUUUAG-CGAAGUGAGGUUU 5'
query=miR159g-3p, target=R03G_15485, score=4, range=3574-3592,
strand=1
target 5' UC-GAUUGCUUCACUUCAAU 3'
:: : : : : : : : : : : :
query 3' AGUUUAGCGAAGUGAGGUUU 5'
query=miR159g-3p, target=R03G_08165, score=4, range=556-575, stra
target 5' UCAGAUUGCUUCAUACCAA 3'
::::: : : : : : : : : :
query 3' AGUUUAGCGAAGUGAGGUUU 5'
query=miR159g-3p, target=R03G_07951, score=4, range=376-395, stra
target 5' UCCAAUCGCUUCUCUCUAAA 3'
:: : : : : : : : : : : :
query 3' AGUUUAGCGAAGUGAGGUUU 5'
query=miR159g-3p, target=R03G_15766, score=4, range=788-806, stra
target 5' UCAAU-GCUUCAUUCAGC 3'
::::: : : : : : : : : :
query 3' AGUUUAGCGAAGUGAGGUUU 5'
query=miR159g-3p, target=R03G_08004, score=4, range=2147-2165,
strand=-1
target 5' CUAAGU-GCUUCACUCCAAU 3'
..... : : : : : : : : : :
query 3' AGUUUAGCGAAGUGAGGUUU 5'
query=miR397a, target=R03G_06442, score=4, range=5174-5194, stran
target 5' CAUCAUCCUGUAUUCAAUGA 3'
::::: : : : : : : : : :
query 3' GUAGUUGCGACGUGAGUUACU 5'
query=miR397a, target=R03G_02691, score=4, range=8006-8026, stran
target 5' CAUCAUCCUGUAUUCAAUGA 3'
::::: : : : : : : : : :
query 3' GUAGUUGCGACGUGAGUUACU 5'
query=miR397a, target=R03G_09965, score=4, range=4517-4537, stran
target 5' CAUCAUCCUGUAUUCAAUGA 3'
::::: : : : : : : : : :

```

```

query 3' GUAGUUGCGACGUGAGUUACU 5'
query=miR397a, target=R03G_13920, score=4, range=4517-4537, stran
target 5' CAUCAUCCCUGUAUUCAAUGA 3'
: : : : : : : : : : : :
query 3' GUAGUUGCGACGUGAGUUACU 5'
query=miR397a, target=R03G_03547, score=4, range=4517-4537, stran
target 5' CAUCAUCCCUGUAUUCAAUGA 3'
: : : : : : : : : : : :
query 3' GUAGUUGCGACGUGAGUUACU 5'
query=miR397a, target=R03G_13867, score=4, range=4433-4453, stran
target 5' CAUCAUCCCUGUAUUCAAUGA 3'
: : : : : : : : : : : :
query 3' GUAGUUGCGACGUGAGUUACU 5'
query=miR397a, target=R03G_02959, score=4, range=4517-4537, stran
target 5' CAUCAUCCCUGUAUUCAAUGA 3'
: : : : : : : : : : : :
query 3' GUAGUUGCGACGUGAGUUACU 5'
query=miR397a, target=R03G_15250, score=4, range=4472-4492, stran
target 5' CAUCAUCCCUGUAUUCAAUGA 3'
: : : : : : : : : : ~
query 3' GUAGUUGCGACGUGAGUUACU 5'
query=miR397a, target=R03G_17371, score=4, range=4472-4492, stran
target 5' CAUCAUCCCUGUAUUCAAUGA 3'
: : ~ : : : : : : : : : :
query 3' GUAGUUGCGACGUGAGUUACU 5'
query=miR397a, target=R03G_06427, score=4, range=4109-4129, stran
target 5' CAUCAUCCCUGUAUUCAAUGA 3'
: : ~ : : : : ~ : : : : : :
query 3' GUAGUUGCGACGUGAGUUACU 5'
query=miR397a, target=R03G_17326, score=4, range=4349-4369, stran
target 5' CAUCAUCCCUGUAUUCAAUGA 3'
: : ~ : : : : ~ : : : : ~
query 3' GUAGUUGCGACGUGAGUUACU 5'
query=miR397a, target=R03G_06428, score=4, range=3611-3631, stran
target 5' CAUCAUCCCUGUAUUCAAUGA 3'
: : ~ : : : : ~ : : : : ~
query 3' GUAGUUGCGACGUGAGUUACU 5'
query=miR397a, target=R03G_13749, score=4, range=3026-3046, stran
target 5' CAUCAUCCCUGUAUUCAAUGA 3'
: : ~ : : : : ~ : : : : ~
query 3' GUAGUUGCGACGUGAGUUACU 5'
query=miR397a, target=R03G_05619, score=4, range=2660-2680, stran
target 5' CAUCAUCCCUGUAUUCAAUGA 3'
: : ~ : : : : ~ : : : : ~
query 3' GUAGUUGCGACGUGAGUUACU 5'

```

```

query=miR397a, target=R03G_14355, score=4, range=2723-2743, stran
target 5' CAUCAUCCCUGUAUUCAAUGA 3'
:::::: : ::::::::::::::
query 3' GUAGUUGCGACGUGAGUUACU 5'
query=miR397a, target=R03G_01330, score=4, range=1751-1771, stran
target 5' CAUCAUCCCUGUAUUCAAUGA 3'
:::::: : ::::::::::::::
query 3' GUAGUUGCGACGUGAGUUACU 5'
query=miR397a, target=R03G_11776, score=4, range=1607-1627, stran
target 5' CAUCAUCCCUGUAUUCAAUGA 3'
:::::: : ::::::::::::::
query 3' GUAGUUGCGACGUGAGUUACU 5'
query=miR397a, target=R03G_02222, score=4, range=1571-1591, stran
target 5' CAUCAUCCCUGUAUUCAAUGA 3'
:::::: : ::::::::::::::
query 3' GUAGUUGCGACGUGAGUUACU 5'
query=miR397a, target=R03G_04115, score=4, range=1460-1480, stran
target 5' CAUCAUCCCUGUAUUCAAUGA 3'
:::::: : ::::::::::::::
query 3' GUAGUUGCGACGUGAGUUACU 5'
query=miR397a, target=R03G_17404, score=4, range=1145-1165, stran
target 5' CAUCAUCCCUGUAUUCAAUGA 3'
:::::: : ::::::::::::::
query 3' GUAGUUGCGACGUGAGUUACU 5'
query=miR397a, target=R03G_07668, score=4, range=920-940, strand=
target 5' CAUCAUCCCUGUAUUCAAUGA 3'
:::::: : ::::::::::::::
query 3' GUAGUUGCGACGUGAGUUACU 5'
query=miR397a, target=R03G_05265, score=4, range=329-349, strand=
target 5' CAUCAUCCCUGUAUUCAAUGA 3'
:::::: : ::::::::::::::
query 3' GUAGUUGCGACGUGAGUUACU 5'
query=miR397a, target=R03G_05903, score=4, range=329-349, strand=
target 5' CAUCAUCCCUGUAUUCAAUGA 3'
:::::: : ::::::::::::::
query 3' GUAGUUGCGACGUGAGUUACU 5'
query=miR5786, target=R03G_05613, score=4, range=678-698, strand=
target 5' AGCUUUACGU-UAUCCUGCGAA 3'
:::::: : : ::::::::::::::
query 3' UCGAACUGGAGAUAGGACGCUU 5'
query=miR8775, target=R03G_09964, score=0, range=343-361, strand=
target 5' CCAUCGGUUCAAUCUGCAA 3'
::::::::::::::::::::::::::
query 3' GGUAGCCAAGUUAGACGUU 5'
query=miR8775, target=R03G_01558, score=4, range=1532-1549, stran

```

target 5' CUGU-GGUUCGAUUUGCAA 3'  
...: :::::::::::::::  
query 3' GGUAGCCAAGUUAGACGUU 5'  
query=miR8775, target=R03G\_14802, score=4, range=3105-3123, stran  
target 5' CUACUGGUUCAAUUCUGAAA 3'  
:..: .::::::::::::: ::  
query 3' GGUAGCCAAGUUAGACGUU 5'  
query=miR8775, target=R03G\_14706, score=4, range=3243-3261, stran  
target 5' CUACUGGUUCAAUUCUGAAA 3'  
:..: .::::::::::::: ::  
query 3' GGUAGCCAAGUUAGACGUU 5'  
query=miR8775, target=R03G\_06905, score=4, range=12-31, strand=1  
target 5' UUAUGGUGUCAAUUUGCAA 3'  
....: : :::::::::::::::  
query 3' GGUAGC-CAAGUUAGACGUU 5'  
query=miR8775, target=R03G\_06335, score=4, range=484-501, strand=  
target 5' UCAUUUGUCAAUCU-CAA 3'  
.....: ::::::::::::::: :::  
query 3' GGUAGCCAAGUUAGACGUU 5'  
query=miR8775, target=R03G\_13976, score=4, range=287-305, strand=  
target 5' CCUUCUGUUUGAUCUGCAA 3'  
::: ::: :::::::::::::::  
query 3' GGUAGCCAAGUUAGACGUU 5'  
query=miR3946, target=R03G\_17023, score=1, range=1225-1246, stran  
target 5' CAUGCUCUUCUUUCUUCUACA 3'  
:.....: :::::::::::::::  
query 3' GUACGAGAGAGAAAAGAGAUGU 5'  
query=miR3946, target=R03G\_10379, score=3, range=319-340, strand=  
target 5' CUUGUUCUUUCUUUCUUUACA 3'  
: :.....: :::::::::::::::  
query 3' GUACGAGAGAGAAAAGAGAUGU 5'  
query=miR3946, target=R03G\_02013, score=4, range=1467-1489, stran  
target 5' CAUCUUCUUUCUUUCUUCUACA 3'  
:..: .::::::::::: :.....: :::::::::::::::  
query 3' GUACGAGAGAGAAAAG-AGAUGU 5'  
query=miR8748, target=R03G\_04592, score=0, range=1361-1383, stran  
target 5' AUUCAUUAUUAUCAUCACCAUCA 3'  
:.....: :::::::::::::::  
query 3' UAAGUAAUAAUAGUAGUGGUAGU 5'  
query=miR8748, target=R03G\_10217, score=1, range=2189-2211, stran  
target 5' AUUCAUUAUCAUCAUCACCAUCA 3'  
:.....: :::::::::::::::  
query 3' UAAGUAAUAAUAGUAGUGGUAGU 5'  
query=miR8748, target=R03G\_16749, score=1, range=2189-2211, stran  
target 5' AUUCAUUAUCAUCAUCACCAUCA 3'

query 3' UAAGUAAUAAUAGUAGUGGUAGU 5'  
query=miR8748, target=R03G\_13273, score=1, range=2189-2211, stran  
target 5' AUUCAUUAUCAUCAUCAUCA 3'

query 3' UAAGUAAUAAUAGUAGUGGUAGU 5'  
query=miR8748, target=R03G\_13145, score=1, range=2189-2211, stran  
target 5' AUUCAUUAUCAUCAUCAUCA 3'

query 3' UAAGUAAUAAUAGUAGUGGUAGU 5'  
query=miR8748, target=R03G\_05424, score=1, range=2105-2127, stran  
target 5' AUUCAUUAUCAUCAUCAUCA 3'

query 3' UAAGUAAUAAUAGUAGUGGUAGU 5'  
query=miR8748, target=R03G\_17257, score=1, range=2105-2127, stran  
target 5' AUUCAUUAUCAUCAUCAUCA 3'

query 3' UAAGUAAUAAUAGUAGUGGUAGU 5'  
query=miR8748, target=R03G\_16136, score=1, range=2105-2127, stran  
target 5' AUUCAUUAUCAUCAUCAUCA 3'

query 3' UAAGUAAUAAUAGUAGUGGUAGU 5'  
query=miR8748, target=R03G\_15889, score=1, range=2105-2127, stran  
target 5' AUUCAUUAUCAUCAUCAUCA 3'

query 3' UAAGUAAUAAUAGUAGUGGUAGU 5'  
query=miR8748, target=R03G\_10735, score=1, range=1634-1656, stran  
target 5' AUUCAUUAUCAUCAUCAUCA 3'

query 3' UAAGUAAUAAUAGUAGUGGUAGU 5'  
query=miR8748, target=R03G\_09183, score=1, range=1322-1344, stran  
target 5' AUUCAUUAUCAUCAUCAUCA 3'

query 3' UAAGUAAUAAUAGUAGUGGUAGU 5'  
query=miR8748, target=R03G\_17351, score=1, range=917-939, strand=  
target 5' AUUCAUUAUCAUCAUCAUCA 3'

query 3' UAAGUAAUAAUAGUAGUGGUAGU 5'  
query=miR8748, target=R03G\_04681, score=1, range=779-801, strand=  
target 5' AUUCAUUAUCAUCAUCAUCA 3'

query 3' UAAGUAAUAAUAGUAGUGGUAGU 5'  
query=miR8748, target=R03G\_07697, score=1, range=515-537, strand=  
target 5' AUUCAUUAUCAUCAUCAUCA 3'

```

query 3' UAAGUAAUAAUAGUAGUGGUAGU 5'
query=miR8748, target=R03G_10040, score=1, range=779-801, strand=
target 5' AUUCAUUAUCAUCAUCAUCA 3'
.:.:.:.:.:.:.:.:.:.:.:
query 3' UAAGUAAUAAUAGUAGUGGUAGU 5'
query=miR8748, target=R03G_00422, score=2.5, range=36-57, strand=
target 5' AUUC-UUGUUAUCAUCAUCA 3'
.:.:.:.:.:.:.:.:.:.:.:
query 3' UAAGUAAUAAUAGUAGUGGUAGU 5'
query=miR8748, target=R03G_00289, score=3, range=917-939, strand=
target 5' AUUCAUUAUCAUUAUCAUCAUCA 3'
.:.:.:.:.:.:.:.:.:.:.:
query 3' UAAGUAAUAAUAGUAGUGGUAGU 5'
query=miR8748, target=R03G_13923, score=3, range=228-250, strand=
target 5' GCUUAUUUAUCAUCAUCAUCA 3'
.:.:.:.:.:.:.:.:.:.:.:
query 3' UAAGUAAUAAUAGUAGUGGUAGU 5'
query=miR8748, target=R03G_01836, score=3, range=258-280, strand=
target 5' AUUCAUCAUAAUCAUCAUCAUCA 3'
.:.:.:.:.:.:.:.:.:.:.:
query 3' UAAGUAAUAAUAGUAGUGGUAGU 5'
query=miR8748, target=R03G_09516, score=3.5, range=240-262, stran
target 5' UAUUAUUUAUCAUCAUCAUCA 3'
.:.:.:.:.:.:.:.:.:.:.:
query 3' UAAGUAAUAAUAGUAGUGGUAGU 5'
query=miR8748, target=R03G_03951, score=3.5, range=672-694, stran
target 5' CUUCAUUAUCAUCAUCAUCAUCG 3'
.:.:.:.:.:.:.:.:.:.:
query 3' UAAGUAAUAAUAGUAGUGGUAGU 5'
query=miR8748, target=R03G_10591, score=3.5, range=999-1021, stra
target 5' AAUCGUCAUUAUCAUCAUCAUCA 3'
.:.:.:.:.:.:.:.:.:.:
query 3' UAAGUAAUAAUAGUAGUGGUAGU 5'
query=miR8748, target=R03G_14401, score=4, range=776-799, strand=
target 5' AAUUGUUAUUAUCAUCAUCAUCA 3'
.:.:.:.:.:.:.:.:.:.:
query 3' UAAGUAAUAAUAGUAGU-GGUAGU 5'
query=miR8748, target=R03G_03827, score=4, range=1063-1085, stran
target 5' AAUCAUCAUCAUCAUCAUCAUCA 3'
.:.:.:.:.:.:.:.:.:.:
query 3' UAAGUAAUAAUAGUAGUGGUAGU 5'
query=miR8748, target=R03G_00729, score=4, range=1048-1070, stran
target 5' AAUCAUCAUCAUCAUCAUCAUCA 3'
.:.:.:.:.:.:.:.:.:.:
query 3' UAAGUAAUAAUAGUAGUGGUAGU 5'

```

query=miR8748, target=R03G\_07191, score=4, range=281-303, strand=  
target 5' AUAGAGCAUUAUCAUCACCAUCA 3'  
:: : :::::::::::::::::::::  
query 3' UAAGUAAUAAUAGUAGUGGUAGU 5'  
query=miR8748, target=R03G\_10973, score=4, range=576-598, strand=  
target 5' GGUCGUUAAUUAUCAUCGUCAUCA 3'  
. :::::::::::::::::::::  
query 3' UAAGUAAUAAUAGUAGUGGUAGU 5'  
query=miR8748, target=R03G\_14835, score=4, range=450-473, strand=  
target 5' GUUCUGUAAUUAUCAUCAUCGUCA 3'  
.:::: :::::::::::::::::::::  
query 3' UAAG-UAAUAAUAGUAGUGGUAGU 5'  
query=miR8748, target=R03G\_09517, score=4, range=507-529, strand=  
target 5' GUUCAUUGUUAUCAUCAACAUC 3'  
.::::: :::::::::::::::::::::  
query 3' UAAGUAAUAAUAGUAGUGGUAGU 5'  
query=miR8748, target=R03G\_13781, score=4, range=210-232, strand=  
target 5' AUUUGUCAUCAUCAUCAUCAUCA 3'  
:.....: :: :::::::::::::::::::::  
query 3' UAAGUAAUAAUAGUAGUGGUAGU 5'  
query=miR8748, target=R03G\_11361, score=4, range=192-214, strand=  
target 5' AUUCAUCGAUAUCAUCGCCAUCG 3'  
:.....: . :::::::::::::::::::::  
query 3' UAAGUAAUAAUAGUAGUGGUAGU 5'  
query=miR8748, target=R03G\_00068, score=4, range=933-955, strand=  
target 5' CUUCAUCAUCAUCAUCAUCAUCA 3'  
:.....: :: :::::::::::::::::::::  
query 3' UAAGUAAUAAUAGUAGUGGUAGU 5'  
query=miR8748, target=R03G\_15427, score=4, range=630-652, strand=  
target 5' CUUCAUCAUCAUCAUCAUCAUCA 3'  
:.....: :: :::::::::::::::::::::  
query 3' UAAGUAAUAAUAGUAGUGGUAGU 5'  
query=miR8748, target=R03G\_10691, score=4, range=522-544, strand=  
target 5' AGUCAUCAUCAUCAUCAUCAUCA 3'  
: :.....: :: :::::::::::::::::::::  
query 3' UAAGUAAUAAUAGUAGUGGUAGU 5'  
query=miR8748, target=R03G\_15993, score=4, range=723-746, strand=  
target 5' AUGUCAUCAUCAUCAUCAUCAUCA 3'  
:: :.....: :: :::::::::::::::::::::  
query 3' UA-AGUAAUAAUAGUAGUGGUAGU 5'  
query=miR8748, target=R03G\_15201, score=4, range=492-514, strand=  
target 5' AAUCAUCAUCAUCAUCAUCAUCA 3'  
: :.....: :: :::::::::::::::::::::  
query 3' UAAGUAAUAAUAGUAGUGGUAGU 5'  
query=miR8748, target=R03G\_04948, score=4, range=402-424, strand=

target 5' CAUCAUCAUCAUCAACCAUCA 3'  
:::: :: ::::::::::::::  
query 3' UAAGUAAUAAUAGUAGUGGUAGU 5'  
query=miR8748, target=R03G\_06092, score=4, range=4407-4428, stran  
target 5' CUUCA-ACUUAUCAUCAACCAUCA 3'  
:::: ::::::::::::::  
query 3' UAAGUAAUAAUAGUAGUGGUAGU 5'  
query=miR408-3p, target=R03G\_11207, score=4, range=2798-2816, str  
target 5' CGAUGGAAGAGGCAG-GCAU 3'  
: : :::::::::::::: ::::  
query 3' GGUCCCUUCUCCGUCACGUA 5'  
query=miR408-3p, target=R03G\_04583, score=4, range=378-396, stran  
target 5' CCAAGGAAGAGG-AGUGUAU 3'  
::: :::::::::::::: :::::  
query 3' GGUCCCUUCUCCGUCACGUA 5'  
query=miR9663-5p, target=R03G\_12194, score=0, range=927-945, stra  
target 5' AGAAUCGGUCGACUACGUU 3'  
::::::::::::::::::  
query 3' UCUUAGCCAGCUGAUGCAA 5'  
query=miR9663-5p, target=R03G\_05630, score=0, range=927-945, stra  
target 5' AGAAUCGGUCGACUACGUU 3'  
::::::::::::::::::  
query 3' UCUUAGCCAGCUGAUGCAA 5'  
query=miR9663-5p, target=R03G\_12951, score=0, range=927-945, stra  
target 5' AGAAUCGGUCGACUACGUU 3'  
::::::::::::::::::  
query 3' UCUUAGCCAGCUGAUGCAA 5'  
query=miR9663-5p, target=R03G\_03988, score=0, range=927-945, stra  
target 5' AGAAUCGGUCGACUACGUU 3'  
::::::::::::::::::  
query 3' UCUUAGCCAGCUGAUGCAA 5'  
query=miR9663-5p, target=R03G\_09376, score=0, range=927-945, stra  
target 5' AGAAUCGGUCGACUACGUU 3'  
::::::::::::::::::  
query 3' UCUUAGCCAGCUGAUGCAA 5'  
query=miR9663-5p, target=R03G\_13152, score=0, range=927-945, stra  
target 5' AGAAUCGGUCGACUACGUU 3'  
::::::::::::::::::  
query 3' UCUUAGCCAGCUGAUGCAA 5'  
query=miR9663-5p, target=R03G\_02235, score=0, range=270-288, stra  
target 5' AGAAUCGGUCGACUACGUU 3'  
::::::::::::::::::  
query 3' UCUUAGCCAGCUGAUGCAA 5'  
query=miR9663-5p, target=R03G\_11970, score=0, range=927-945, stra  
target 5' AGAAUCGGUCGACUACGUU 3'



query 3' UCUUAGCCAGCUGAUGCAA 5'  
query=miR9663-5p, target=R03G\_12979, score=0, range=927-945, str  
target 5' AGAAUCGGUCGACUACGUU 3'

query 3' UCUUAGCCAGCUGAUGCAA 5'  
query=miR9663-5p, target=R03G\_12087, score=0, range=927-945, str  
target 5' AGAAUCGGUCGACUACGUU 3'

query 3' UCUUAGCCAGCUGAUGCAA 5'  
query=miR9663-5p, target=R03G\_10555, score=0, range=927-945, str  
target 5' AGAAUCGGUCGACUACGUU 3'

query 3' UCUUAGCCAGCUGAUGCAA 5'  
query=miR9663-5p, target=R03G\_03103, score=0, range=927-945, str  
target 5' AGAAUCGGUCGACUACGUU 3'

query 3' UCUUAGCCAGCUGAUGCAA 5'  
query=miR9663-5p, target=R03G\_08612, score=0, range=927-945, str  
target 5' AGAAUCGGUCGACUACGUU 3'

query 3' UCUUAGCCAGCUGAUGCAA 5'  
query=miR9663-5p, target=R03G\_07305, score=0, range=927-945, str  
target 5' AGAAUCGGUCGACUACGUU 3'

query 3' UCUUAGCCAGCUGAUGCAA 5'  
query=miR9663-5p, target=R03G\_05280, score=0, range=927-945, str  
target 5' AGAAUCGGUCGACUACGUU 3'

query 3' UCUUAGCCAGCUGAUGCAA 5'  
query=miR9663-5p, target=R03G\_16686, score=0, range=927-945, str  
target 5' AGAAUCGGUCGACUACGUU 3'

query 3' UCUUAGCCAGCUGAUGCAA 5'  
query=miR9663-5p, target=R03G\_14704, score=0, range=927-945, str  
target 5' AGAAUCGGUCGACUACGUU 3'

query 3' UCUUAGCCAGCUGAUGCAA 5'  
query=miR9663-5p, target=R03G\_13859, score=0, range=552-570, str  
target 5' AGAAUCGGUCGACUACGUU 3'

query 3' UCUUAGCCAGCUGAUGCAA 5'  
query=miR9663-5p, target=R03G\_01203, score=0, range=927-945, str  
target 5' AGAAUCGGUCGACUACGUU 3'

```

query 3' UCUUAGCCAGCUGAUGCAA 5'
query=miR9663-5p, target=R03G_01718, score=0, range=927-945, stra
target 5' AGAAUCGGUCGACUACGUU 3'
.....
query 3' UCUUAGCCAGCUGAUGCAA 5'
query=miR9663-5p, target=R03G_15869, score=0, range=927-945, stra
target 5' AGAAUCGGUCGACUACGUU 3'
.....
query 3' UCUUAGCCAGCUGAUGCAA 5'
query=miR9663-5p, target=R03G_11403, score=0, range=927-945, stra
target 5' AGAAUCGGUCGACUACGUU 3'
.....
query 3' UCUUAGCCAGCUGAUGCAA 5'
query=miR9663-5p, target=R03G_06416, score=0, range=927-945, stra
target 5' AGAAUCGGUCGACUACGUU 3'
.....
query 3' UCUUAGCCAGCUGAUGCAA 5'
query=miR9663-5p, target=R03G_11275, score=0, range=927-945, stra
target 5' AGAAUCGGUCGACUACGUU 3'
.....
query 3' UCUUAGCCAGCUGAUGCAA 5'
query=miR9663-5p, target=R03G_16744, score=0, range=927-945, stra
target 5' AGAAUCGGUCGACUACGUU 3'
.....
query 3' UCUUAGCCAGCUGAUGCAA 5'
query=miR9663-5p, target=R03G_10560, score=0, range=927-945, stra
target 5' AGAAUCGGUCGACUACGUU 3'
.....
query 3' UCUUAGCCAGCUGAUGCAA 5'
query=miR9663-5p, target=R03G_07104, score=0, range=927-945, stra
target 5' AGAAUCGGUCGACUACGUU 3'
.....
query 3' UCUUAGCCAGCUGAUGCAA 5'
query=miR9663-5p, target=R03G_04610, score=3.5, range=319-337,
strand=-1
target 5' CGGAUCGGUCAACUACGUU 3'
.....
query 3' UCUUAGCCAGCUGAUGCAA 5'
query=miR9663-5p, target=R03G_00313, score=4, range=2798-2817,
strand=1
target 5' AGAGUUGCGUCGACUGCGUU 3'
.....
query 3' UCUUAGC-CAGCUGAUGCAA 5'
query=miR9663-5p, target=R03G_13398, score=4, range=326-344, stra
target 5' AGAAUAGGUCGAUUGUGUU 3'

```

```
::::: :::::::::::::::
query 3' UCUUAGCCAGCUGAUGCAA 5'
query=miR9663-5p, target=R03G_13700, score=4, range=14-32, strand
target 5' CGUAUCAGUCGACUACGUU 3'
: ::: :::::::::::::::
query 3' UCUUAGCCAGCUGAUGCAA 5'
query=miR9663-5p, target=R03G_06018, score=4, range=17-35, strand
target 5' UGAACGGGUCGACUGCGUU 3'
::: :::::::::::::::
query 3' UCUUAGCCAGCUGAUGCAA 5'
query=miR9554-3p, target=R03G_12520, score=0, range=1561-1583,
strand=1
target 5' AUGAAUGAUGACUUGAGCUAUGA 3'
:::::::::::::::::::::
query 3' UACUUACUACUGAACUCGAUACU 5'
query=miR9554-3p, target=R03G_00797, score=0, range=1561-1583,
strand=1
target 5' AUGAAUGAUGACUUGAGCUAUGA 3'
:::::::::::::::::::::
query 3' UACUUACUACUGAACUCGAUACU 5'
query=miR9554-3p, target=R03G_02103, score=2, range=88-110, stran
target 5' AUGAACGACGACUUGAGCUAUGA 3'
::::: :: :::::::::::::::
query 3' UACUUACUACUGAACUCGAUACU 5'
query=miR9554-3p, target=R03G_01994, score=4, range=422-443, stra
target 5' AUG-AUGAUGACUUGAGUUUAUA 3'
::: ::::::::::::::: :
query 3' UACUUACUACUGAACUCGAUACU 5'
query=miR9554-3p, target=R03G_05597, score=4, range=54-77, strand
target 5' AUUAAUCGAAGACUUGGGCUAUGA 3'
:: :: :: :::::::::::::::
query 3' UACUUA-CUACUGAACUCGAUACU 5'
query=miR858b, target=R03G_16744, score=0, range=1773-1792, stran
target 5' CAAGCGACGAACAGAACGAA 3'
:::::::::::::::::::::
query 3' GUUCGCUGCUUGUCUUGCUU 5'
query=miR858b, target=R03G_01203, score=0, range=1773-1792, stran
target 5' CAAGCGACGAACAGAACGAA 3'
:::::::::::::::::::::
query 3' GUUCGCUGCUUGUCUUGCUU 5'
query=miR858b, target=R03G_11403, score=0, range=1773-1792, stran
target 5' CAAGCGACGAACAGAACGAA 3'
:::::::::::::::::::::
query 3' GUUCGCUGCUUGUCUUGCUU 5'
query=miR858b, target=R03G_06416, score=0, range=1773-1792, stran
```

target 5' CAAGCGACGAACAGAACGAA 3'  
.....  
query 3' GUUCGUCGCUUGUCUUGCUU 5'  
query=miR858b, target=R03G\_01718, score=0, range=1773-1792, stran  
target 5' CAAGCGACGAACAGAACGAA 3'  
.....  
query 3' GUUCGUCGCUUGUCUUGCUU 5'  
query=miR858b, target=R03G\_15869, score=0, range=1773-1792, stran  
target 5' CAAGCGACGAACAGAACGAA 3'  
.....  
query 3' GUUCGUCGCUUGUCUUGCUU 5'  
query=miR858b, target=R03G\_10560, score=0, range=1773-1792, stran  
target 5' CAAGCGACGAACAGAACGAA 3'  
.....  
query 3' GUUCGUCGCUUGUCUUGCUU 5'  
query=miR858b, target=R03G\_11275, score=0, range=1773-1792, stran  
target 5' CAAGCGACGAACAGAACGAA 3'  
.....  
query 3' GUUCGUCGCUUGUCUUGCUU 5'  
query=miR858b, target=R03G\_13859, score=0, range=1398-1417, stran  
target 5' CAAGCGACGAACAGAACGAA 3'  
.....  
query 3' GUUCGUCGCUUGUCUUGCUU 5'  
query=miR858b, target=R03G\_12194, score=0, range=1773-1792, stran  
target 5' CAAGCGACGAACAGAACGAA 3'  
.....  
query 3' GUUCGUCGCUUGUCUUGCUU 5'  
query=miR858b, target=R03G\_09376, score=0, range=1773-1792, stran  
target 5' CAAGCGACGAACAGAACGAA 3'  
.....  
query 3' GUUCGUCGCUUGUCUUGCUU 5'  
query=miR858b, target=R03G\_07735, score=3, range=2831-2850, stran  
target 5' AGAGCGACGAGCAGAACGAG 3'  
.....  
query 3' GUUCGUCGCUUGUCUUGCUU 5'  
query=miR858b, target=R03G\_10543, score=3, range=2384-2403, stran  
target 5' AGAGCGACGAGCAGAACGAG 3'  
.....  
query 3' GUUCGUCGCUUGUCUUGCUU 5'  
query=miR858b, target=R03G\_10744, score=3, range=2930-2949, stran  
target 5' AGAGCGACGAGCAGAACGAG 3'  
.....  
query 3' GUUCGUCGCUUGUCUUGCUU 5'  
query=miR858b, target=R03G\_14563, score=3, range=494-513, strand=  
target 5' AGAGCGACGAGCAGAACGAG 3'

```
. : : : : : : : : : : : : .
query 3' GUUCGCUGCUUGUCUUGCUU 5'
query=miR858b, target=R03G_10745, score=3, range=1898-1917, stran
target 5' AGAGCGACGAGCAGAACGAG 3'
. : : : : : : : : : : .
query 3' GUUCGCUGCUUGUCUUGCUU 5'
query=miR858b, target=R03G_07862, score=3, range=3041-3060, stran
target 5' AGAGCGACGAGCAGAACGAG 3'
. : : : : : : : : : .
query 3' GUUCGCUGCUUGUCUUGCUU 5'
query=miR858b, target=R03G_17255, score=3, range=2882-2901, stran
target 5' AGAGCGACGAGCAGAACGAG 3'
. : : : : : : : : .
query 3' GUUCGCUGCUUGUCUUGCUU 5'
query=miR858b, target=R03G_17156, score=3, range=1184-1203, stran
target 5' AGAGCGACGAGCAGAACGAG 3'
. : : : : : : : : .
query 3' GUUCGCUGCUUGUCUUGCUU 5'
query=miR858b, target=R03G_16919, score=3, range=506-525, strand=
target 5' AGAGCGACGAGCAGAACGAG 3'
. : : : : : : : .
query 3' GUUCGCUGCUUGUCUUGCUU 5'
query=miR858b, target=R03G_13224, score=3.5, range=1649-1669,
strand=-1
target 5' CUGGUAGGCGAACAGAACGAA 3'
: . : . : : : : : : : : : :
query 3' GUUCG-CUGCUUGUCUUGCUU 5'
query=miR858b, target=R03G_13221, score=3.5, range=1649-1669,
strand=-1
target 5' CUGGUAGGCGAACAGAACGAA 3'
: . : . : : : : : : : : :
query 3' GUUCG-CUGCUUGUCUUGCUU 5'
query=miR858b, target=R03G_04120, score=3.5, range=1649-1669,
strand=-1
target 5' CUGGUAGGCGAACAGAACGAA 3'
: . : . : : : : : : : : :
query 3' GUUCG-CUGCUUGUCUUGCUU 5'
query=miR858b, target=R03G_04203, score=3.5, range=593-613, stran
target 5' CUGGCAAACGAACAGAACGAA 3'
: . : . : : : : : : : : :
query 3' GUUCG-CUGCUUGUCUUGCUU 5'
query=miR858b, target=R03G_16122, score=3.5, range=62-82, strand=
target 5' CUGGCAAACGAACAGAACGAA 3'
: . : . : : : : : : : : :
query 3' GUUCG-CUGCUUGUCUUGCUU 5'
```

query=miR858b, target=R03G\_11693, score=4, range=134-153, strand=  
target 5' CAAACGACGAAAAGAAUGAA 3'  
::: ::::: ::::: :::::  
query 3' GUUCGCUGCUUGUCUUGCUU 5'  
query=miR858b, target=R03G\_17150, score=4, range=2048-2068, stran  
target 5' UAAGCUGACGAGCGGAACGAG 3'  
.::::: ::::: ::::: :::::  
query 3' GUUCG-CUGCUUGUCUUGCUU 5'  
query=miR858b, target=R03G\_11767, score=4, range=1202-1222, stran  
target 5' UAAGCUGACGAGCGGAACGAG 3'  
.::::: ::::: ::::: :::::  
query 3' GUUCG-CUGCUUGUCUUGCUU 5'  
query=miR858b, target=R03G\_12316, score=4, range=53-72, strand=-1  
target 5' CAAGUUACGAACAGCACGAG 3'  
::::. ::::: ::::: :::::  
query 3' GUUCGCUGCUUGUCUUGCUU 5'  
query=miR858b, target=R03G\_16290, score=4, range=821-839, strand=  
target 5' CAAGC-ACGAAUAGAAUGAU 3'  
::::: ::::: ::::: :::::  
query 3' GUUCGCUGCUUGUCUUGCUU 5'  
query=miR858b, target=R03G\_00335, score=4, range=11-30, strand=-1  
target 5' CUUGCGACCAACAGAACGAA 3'  
: ::::: ::::: ::::: :::::  
query 3' GUUCGCUGCUUGUCUUGCUU 5'  
query=miR827, target=R03G\_16161, score=3, range=675-694, strand=1  
target 5' AUUUAAUGAUGGUCAUUUAA 3'  
::::: ::::: ::::: :::::  
query 3' UAAACAACUACCAGUAGAUU 5'  
query=miR827, target=R03G\_15356, score=4, range=687-706, strand=1  
target 5' AUUUGGUGGUUGUCAUCUAA 3'  
::::: ::.: ::::: ::::: :::::  
query 3' UAAACAACUACCAGUAGAUU 5'  
query=miR827, target=R03G\_00714, score=4, range=616-635, strand=-  
target 5' AUUUGUUGAUGGUUUUUUAA 3'  
::::: ::::: ::::: ::::: :::::  
query 3' UAAACAACUACCAGUAGAUU 5'  
query=miR827, target=R03G\_16787, score=4, range=2140-2160, strand  
target 5' CCUUGUUGAUGGUUCAUCUAA 3'  
::::: ::::: ::::: ::::: :::::  
query 3' UAAACAACUACC-AGUAGAUU 5'  
query=miR171a-3p, target=R03G\_16852, score=4, range=398-416, stra  
target 5' AUUUUUUCG-GGCUCAAUCA 3'  
::::: ::: ::::: ::::: :::::  
query 3' UAUAACCGCGCCGAGUUAGU 5'  
query=miR2656a, target=R03G\_02845, score=0, range=214-235, strand

target 5' CCAACGUCCAUAUGCAACUUA 3'  
:::  
query 3' GGUUGCAGGUUAUACGUUGAAU 5'  
query=miR2656a, target=R03G\_13919, score=2, range=181-202, strand  
target 5' CCAACGUCCAUAUGCAACCUA 3'  
:::  
query 3' GGUUGCAGGUUAUACGUUGAAU 5'  
query=miR2656a, target=R03G\_00679, score=2, range=181-202, strand  
target 5' CCAACGUCCAUAUGCAACCUA 3'  
:::  
query 3' GGUUGCAGGUUAUACGUUGAAU 5'  
query=miR2656a, target=R03G\_13286, score=2, range=181-202, strand  
target 5' CCAACGUCCAUAUGCAACCUA 3'  
:::  
query 3' GGUUGCAGGUUAUACGUUGAAU 5'  
query=miR2656a, target=R03G\_00284, score=2, range=181-202, strand  
target 5' CCAACGUCCAUAUGCAACCUA 3'  
:::  
query 3' GGUUGCAGGUUAUACGUUGAAU 5'  
query=miR2656a, target=R03G\_12678, score=2, range=181-202, strand  
target 5' CCAACGUCCAUAUGCAACCUA 3'  
:::  
query 3' GGUUGCAGGUUAUACGUUGAAU 5'  
query=miR2656a, target=R03G\_03602, score=2, range=181-202, strand  
target 5' CCAACGUCCAUAUGCAACCUA 3'  
:::  
query 3' GGUUGCAGGUUAUACGUUGAAU 5'  
query=miR2656a, target=R03G\_02706, score=2, range=181-202, strand  
target 5' CCAACGUCCAUAUGCAACCUA 3'  
:::  
query 3' GGUUGCAGGUUAUACGUUGAAU 5'  
query=miR2656a, target=R03G\_01960, score=2, range=181-202, strand  
target 5' CCAACGUCCAUAUGCAACCUA 3'  
:::  
query 3' GGUUGCAGGUUAUACGUUGAAU 5'  
query=miR2656a, target=R03G\_13454, score=2, range=181-202, strand  
target 5' CCAACGUCCAUAUGCAACCUA 3'  
:::  
query 3' GGUUGCAGGUUAUACGUUGAAU 5'  
query=miR2656a, target=R03G\_17222, score=3, range=181-202, strand  
target 5' CCAUCGUCCAUAUGCAACCUA 3'  
:::  
query 3' GGUUGCAGGUUAUACGUUGAAU 5'  
query=miR2656a, target=R03G\_07707, score=4, range=181-202, strand  
target 5' CCAACGUCCAUAUGCAACCUA 3'

query 3' GGUUGCAGGUUAUACGUUGAAU 5'  
query=miR8123-3p, target=R03G\_16904, score=0, range=483-503, stra  
target 5' GACUUGGACCAAUGGCGACAA 3'

query 3' CUGAACCUGGUUACCGCUGUU 5'  
query=miR8123-3p, target=R03G\_16829, score=0, range=483-503, stra  
target 5' GACUUGGACCAAUGGCGACAA 3'

query 3' CUGAACCUGGUUACCGCUGUU 5'  
query=miR8123-3p, target=R03G\_16428, score=0, range=120-140, stra  
target 5' GACUUGGACCAAUGGCGACAA 3'

query 3' CUGAACCUGGUUACCGCUGUU 5'  
query=miR8123-3p, target=R03G\_16721, score=1, range=441-461, stra  
target 5' GACUUGGACCAAUGGCGAUAA 3'

query 3' CUGAACCUGGUUACCGCUGUU 5'  
query=miR8123-3p, target=R03G\_11411, score=1, range=120-140, stra  
target 5' GACUUGGACCAAUGGCGAUAA 3'

query 3' CUGAACCUGGUUACCGCUGUU 5'  
query=miR8123-3p, target=R03G\_05945, score=1, range=120-140, stra  
target 5' GACUUGGACCAAUGGCGAUAA 3'

query 3' CUGAACCUGGUUACCGCUGUU 5'  
query=miR8123-3p, target=R03G\_16703, score=1.5, range=483-503,  
strand=1  
target 5' GGCUUGGACCAAUGGCGAUAA 3'

query 3' CUGAACCUGGUUACCGCUGUU 5'  
query=miR8123-3p, target=R03G\_13734, score=2, range=483-503, stra  
target 5' GACUUGGACUAAUGGCGAUAA 3'

query 3' CUGAACCUGGUUACCGCUGUU 5'  
query=miR8123-3p, target=R03G\_17154, score=2, range=120-140, stra  
target 5' GACUUGGACUAAUGGCGAUAA 3'

query 3' CUGAACCUGGUUACCGCUGUU 5'  
query=miR8123-3p, target=R03G\_02224, score=2, range=120-140, stra  
target 5' GACUUGGACUAAUGGCGAUAA 3'

query 3' CUGAACCUGGUUACCGCUGUU 5'  
query=miR8123-3p, target=R03G\_12060, score=2, range=120-140, stra  
target 5' GACUUGGACUAAUGGCGAUAA 3'



query 3' CUGAACCUGGUUACCGCUGUU 5'  
query=miR8123-3p, target=R03G\_17202, score=3, range=483-503, strand=1  
target 5' GACUUGGACCAAUGGCAAUAA 3'

query 3' CUGAACCUGGUUACCGCUGUU 5'  
query=miR8123-3p, target=R03G\_00676, score=3, range=483-503, strand=1  
target 5' GACUUGGAGCAAUGGCGAUAA 3'

query 3' CUGAACCUGGUUACCGCUGUU 5'  
query=miR8123-3p, target=R03G\_03594, score=3, range=120-140, strand=1  
target 5' GACUUGGACCAAUGGCAAUAA 3'

query 3' CUGAACCUGGUUACCGCUGUU 5'  
query=miR8123-3p, target=R03G\_14688, score=3, range=1604-1624, strand=-1  
target 5' UAUUUUGGCCAAUGGCGACAA 3'

query 3' CUGAACCUGGUUACCGCUGUU 5'  
query=miR2622, target=R03G\_06442, score=0, range=1126-1148, strand=1  
target 5' UAAUGUUUCACGAUGGCCUCAAA 3'

query 3' AUUACAAAGUGCUACCGGAGUUU 5'  
query=miR2622, target=R03G\_02691, score=0, range=4318-4340, strand=1  
target 5' UAAUGUUUCACGAUGGCCUCAAA 3'

query 3' AUUACAAAGUGCUACCGGAGUUU 5'  
query=miR2622, target=R03G\_09965, score=0, range=829-851, strand=1  
target 5' UAAUGUUUCACGAUGGCCUCAAA 3'

query 3' AUUACAAAGUGCUACCGGAGUUU 5'  
query=miR2622, target=R03G\_13920, score=0, range=829-851, strand=1  
target 5' UAAUGUUUCACGAUGGCCUCAAA 3'

query 3' AUUACAAAGUGCUACCGGAGUUU 5'  
query=miR2622, target=R03G\_03547, score=0, range=829-851, strand=1  
target 5' UAAUGUUUCACGAUGGCCUCAAA 3'

query 3' AUUACAAAGUGCUACCGGAGUUU 5'  
query=miR2622, target=R03G\_02959, score=0, range=829-851, strand=1  
target 5' UAAUGUUUCACGAUGGCCUCAAA 3'

query 3' AUUACAAAGUGCUACCGGAGUUU 5'  
query=miR2622, target=R03G\_15250, score=0, range=829-851, strand=1  
target 5' UAAUGUUUCACGAUGGCCUCAAA 3'

query 3' AUUACAAAGUGCUACCGGAGUUU 5'  
query=miR2622, target=R03G\_17371, score=0, range=829-851, strand=  
target 5' UAAUGUUUCACGAUGGCCUCAAA 3'

query 3' AUUACAAAGUGCUACCGGAGUUU 5'  
query=miR2622, target=R03G\_17326, score=0, range=499-521, strand=  
target 5' UAAUGUUUCACGAUGGCCUCAAA 3'

query 3' AUUACAAAGUGCUACCGGAGUUU 5'  
query=miR2622, target=R03G\_15585, score=0, range=829-851, strand=  
target 5' UAAUGUUUCACGAUGGCCUCAAA 3'

query 3' AUUACAAAGUGCUACCGGAGUUU 5'  
query=miR2622, target=R03G\_04114, score=0, range=829-851, strand=  
target 5' UAAUGUUUCACGAUGGCCUCAAA 3'

query 3' AUUACAAAGUGCUACCGGAGUUU 5'  
query=miR2622, target=R03G\_05272, score=0, range=829-851, strand=  
target 5' UAAUGUUUCACGAUGGCCUCAAA 3'

query 3' AUUACAAAGUGCUACCGGAGUUU 5'  
query=miR2622, target=R03G\_08608, score=0, range=1345-1367, stran  
target 5' UAAUGUUUCACGAUGGCCUCAAA 3'

query 3' AUUACAAAGUGCUACCGGAGUUU 5'  
query=miR2622, target=R03G\_05617, score=0, range=829-851, strand=  
target 5' UAAUGUUUCACGAUGGCCUCAAA 3'

query 3' AUUACAAAGUGCUACCGGAGUUU 5'  
query=miR2622, target=R03G\_00307, score=0, range=1261-1283, stran  
target 5' UAAUGUUUCACGAUGGCCUCAAA 3'

query 3' AUUACAAAGUGCUACCGGAGUUU 5'  
query=miR2622, target=R03G\_14356, score=0, range=829-851, strand=  
target 5' UAAUGUUUCACGAUGGCCUCAAA 3'

query 3' AUUACAAAGUGCUACCGGAGUUU 5'  
query=miR2622, target=R03G\_16696, score=0, range=820-842, strand=  
target 5' UAAUGUUUCACGAUGGCCUCAAA 3'

query 3' AUUACAAAGUGCUACCGGAGUUU 5'  
query=miR2622, target=R03G\_11783, score=0, range=829-851, strand=  
target 5' UAAUGUUUCACGAUGGCCUCAAA 3'









query 3' AUGAGUGUCUUUGUUUGUUAUGU 5'  
query=miR9742, target=R03G\_17371, score=0, range=2652-2674, stran  
target 5' UACUCACAGAAACAAACAAUACA 3'

query 3' AUGAGUGUCUUUGUUUGUUAUGU 5'  
query=miR9742, target=R03G\_06427, score=0, range=2289-2311, stran  
target 5' UACUCACAGAAACAAACAAUACA 3'

query 3' AUGAGUGUCUUUGUUUGUUAUGU 5'  
query=miR9742, target=R03G\_17326, score=0, range=2529-2551, stran  
target 5' UACUCACAGAAACAAACAAUACA 3'

query 3' AUGAGUGUCUUUGUUUGUUAUGU 5'  
query=miR9742, target=R03G\_06428, score=0, range=1791-1813, stran  
target 5' UACUCACAGAAACAAACAAUACA 3'

query 3' AUGAGUGUCUUUGUUUGUUAUGU 5'  
query=miR9742, target=R03G\_13749, score=0, range=1260-1282, stran  
target 5' UACUCACAGAAACAAACAAUACA 3'

query 3' AUGAGUGUCUUUGUUUGUUAUGU 5'  
query=miR9742, target=R03G\_05619, score=0, range=840-862, strand=  
target 5' UACUCACAGAAACAAACAAUACA 3'

query 3' AUGAGUGUCUUUGUUUGUUAUGU 5'  
query=miR9742, target=R03G\_14355, score=0, range=903-925, strand=  
target 5' UACUCACAGAAACAAACAAUACA 3'

query 3' AUGAGUGUCUUUGUUUGUUAUGU 5'  
query=miR9742, target=R03G\_15585, score=0, range=2652-2674, stran  
target 5' UACUCACAGAAACAAACAAUACA 3'

query 3' AUGAGUGUCUUUGUUUGUUAUGU 5'  
query=miR9742, target=R03G\_04114, score=0, range=2697-2719, stran  
target 5' UACUCACAGAAACAAACAAUACA 3'

query 3' AUGAGUGUCUUUGUUUGUUAUGU 5'  
query=miR9742, target=R03G\_02221, score=0, range=2619-2641, stran  
target 5' UACUCACAGAAACAAACAAUACA 3'

query 3' AUGAGUGUCUUUGUUUGUUAUGU 5'  
query=miR9742, target=R03G\_05272, score=0, range=2697-2719, stran  
target 5' UACUCACAGAAACAAACAAUACA 3'

query 3' AUGAGUGUCUUUGUUUGUUAUGU 5'  
query=miR9742, target=R03G\_01613, score=0, range=948-970, strand=  
target 5' UACUCACAGAAACAAACAAUACA 3'  
.....  
query 3' AUGAGUGUCUUUGUUUGUUAUGU 5'  
query=miR9742, target=R03G\_00306, score=0, range=1146-1168, stran  
target 5' UACUCACAGAAACAAACAAUACA 3'  
.....  
query 3' AUGAGUGUCUUUGUUUGUUAUGU 5'  
query=miR9742, target=R03G\_10558, score=0, range=450-472, strand=  
target 5' UACUCACAGAAACAAACAAUACA 3'  
.....  
query 3' AUGAGUGUCUUUGUUUGUUAUGU 5'  
query=miR9742, target=R03G\_05368, score=3, range=1917-1939, stran  
target 5' UAAUAACAUAACAAACAAUACA 3'  
:: : :: : .....

query 3' AUGAGUGUCUUUGUUUGUUAUGU 5'  
query=miR9742, target=R03G\_02099, score=4, range=1832-1855, stran  
target 5' UACCUAGACAGAAUAAGCAAUACA 3'  
:: :: .....

query 3' AU-GAGUGUCUUUGUUUGUUAUGU 5'  
query=miR3434-3p, target=R03G\_09174, score=0, range=665-683, stra  
target 5' UCAACUUGGCUGAUCCUGA 3'  
.....

query 3' AGUUGAACCGACUAGGACU 5'  
query=miR3434-3p, target=R03G\_06414, score=0, range=665-683, stra  
target 5' UCAACUUGGCUGAUCCUGA 3'  
.....

query 3' AGUUGAACCGACUAGGACU 5'  
query=miR3434-3p, target=R03G\_10730, score=0, range=668-686, stra  
target 5' UCAACUUGGCUGAUCCUGA 3'  
.....

query 3' AGUUGAACCGACUAGGACU 5'  
query=miR3434-3p, target=R03G\_17201, score=0, range=665-683, stra  
target 5' UCAACUUGGCUGAUCCUGA 3'  
.....

query 3' AGUUGAACCGACUAGGACU 5'  
query=miR3434-3p, target=R03G\_07736, score=0, range=668-686, stra  
target 5' UCAACUUGGCUGAUCCUGA 3'  
.....

query 3' AGUUGAACCGACUAGGACU 5'  
query=miR3434-3p, target=R03G\_12967, score=0, range=668-686, stra  
target 5' UCAACUUGGCUGAUCCUGA 3'  
.....

query 3' AGUUGAACCGACUAGGACU 5'



query=miR3434-3p, target=R03G\_13449, score=0, range=668-686, strand=1  
target 5' UCAACUUGGCUGAUCCUGA 3'  
:~::~  
query 3' AGUUGAACCGACUAGGACU 5'  
query=miR3434-3p, target=R03G\_10533, score=0, range=668-686, strand=1  
target 5' UCAACUUGGCUGAUCCUGA 3'  
:~::~  
query 3' AGUUGAACCGACUAGGACU 5'  
query=miR3434-3p, target=R03G\_10748, score=0, range=668-686, strand=1  
target 5' UCAACUUGGCUGAUCCUGA 3'  
:~::~  
query 3' AGUUGAACCGACUAGGACU 5'  
query=miR3434-3p, target=R03G\_17254, score=0, range=668-686, strand=1  
target 5' UCAACUUGGCUGAUCCUGA 3'  
:~::~  
query 3' AGUUGAACCGACUAGGACU 5'  
query=miR3434-3p, target=R03G\_07861, score=0, range=668-686, strand=1  
target 5' UCAACUUGGCUGAUCCUGA 3'  
:~::~  
query 3' AGUUGAACCGACUAGGACU 5'  
query=miR3434-3p, target=R03G\_07863, score=0, range=668-686, strand=1  
target 5' UCAACUUGGCUGAUCCUGA 3'  
:~::~  
query 3' AGUUGAACCGACUAGGACU 5'  
query=miR3434-3p, target=R03G\_11978, score=0, range=521-539, strand=1  
target 5' UCAACUUGGCUGAUCCUGA 3'  
:~::~  
query 3' AGUUGAACCGACUAGGACU 5'  
query=miR3434-3p, target=R03G\_11821, score=2, range=2204-2222, strand=1  
target 5' UCAACUUGGCUGGUCUUGA 3'  
:~::~  
query 3' AGUUGAACCGACUAGGACU 5'  
query=miR3434-3p, target=R03G\_14562, score=2, range=605-623, strand=1  
target 5' UCAACUUGGCGGAUCCUGA 3'  
:~::~  
query 3' AGUUGAACCGACUAGGACU 5'  
query=miR3434-3p, target=R03G\_17220, score=2, range=674-692, strand=1  
target 5' UCAACUUGGCGGAUCCUGA 3'  
:~::~  
query 3' AGUUGAACCGACUAGGACU 5'  
query=miR3434-3p, target=R03G\_16903, score=2, range=602-620, strand=1  
target 5' UCAACUUGGCGGAUCCUGA 3'  
:~::~  
query 3' AGUUGAACCGACUAGGACU 5'

query=miR3434-3p, target=R03G\_17250, score=2, range=668-686, strand=1  
target 5' UCAACUUGGCGGAUCCUGA 3'  
.....  
query 3' AGUUGAACCGACUAGGACU 5'  
query=miR3434-3p, target=R03G\_16365, score=2, range=668-686, strand=1  
target 5' UCAACUUGGCGGAUCCUGA 3'  
.....  
query 3' AGUUGAACCGACUAGGACU 5'  
query=miR3434-3p, target=R03G\_10538, score=2, range=626-644, strand=1  
target 5' UCAACUUGGCGGAUCCUGA 3'  
.....  
query 3' AGUUGAACCGACUAGGACU 5'  
query=miR3434-3p, target=R03G\_16358, score=2, range=497-515, strand=1  
target 5' UCAACUUGGCGGACCCUGA 3'  
.....  
query 3' AGUUGAACCGACUAGGACU 5'  
query=miR3434-3p, target=R03G\_04192, score=2.5, range=611-629, strand=1  
target 5' UCGACUUGGCUGGUUCUGA 3'  
.....  
query 3' AGUUGAACCGACUAGGACU 5'  
query=miR3434-3p, target=R03G\_15938, score=3, range=590-608, strand=1  
target 5' UCGAUUUGGCUGGUUCUGA 3'  
.....  
query 3' AGUUGAACCGACUAGGACU 5'  
query=miR3434-3p, target=R03G\_03248, score=3, range=173-191, strand=1  
target 5' UCGGCUUGGUUGAUCCUGC 3'  
.....  
query 3' AGUUGAACCGACUAGGACU 5'  
query=miR3434-3p, target=R03G\_17108, score=3, range=884-902, strand=1  
target 5' GGAACUUGGCUGAUUCUGA 3'  
.....  
query 3' AGUUGAACCGACUAGGACU 5'  
query=miR3434-3p, target=R03G\_11790, score=3, range=1238-1256, strand=1  
target 5' UCAACUUGACUGAUCCUGU 3'  
.....  
query 3' AGUUGAACCGACUAGGACU 5'  
query=miR3434-3p, target=R03G\_12418, score=3, range=1178-1195, strand=1  
target 5' UCAACUUGGCUGAUUC-GA 3'  
.....  
query 3' AGUUGAACCGACUAGGACU 5'  
query=miR3434-3p, target=R03G\_16276, score=3, range=121-139, strand=1  
target 5' UCAAGUUGGCUGCUCCUGA 3'

```
:::: :::::::::: ::::::
query 3' AGUUGAACCGACUAGGACU 5'
query=miR3434-3p, target=R03G_06992, score=3.5, range=443-461,
strand=1
target 5' UCAACUUUGUUGAUCCUGG 3'
::::: :.::::::::::.
query 3' AGUUGAACCGACUAGGACU 5'
query=miR3434-3p, target=R03G_05895, score=3.5, range=293-311,
strand=1
target 5' UCAAAUUGGCUGAUUUUUGG 3'
:::: ::::::::::::::.
query 3' AGUUGAACCGACUAGGACU 5'
query=miR3434-3p, target=R03G_06674, score=3.5, range=245-263,
strand=1
target 5' UUGCCUUGGUUGAUCCUGG 3'
... ::::::::::::::.
query 3' AGUUGAACCGACUAGGACU 5'
query=miR3434-3p, target=R03G_14694, score=3.5, range=962-980,
strand=1
target 5' UCGUCUGGGCUGAUCCUGA 3'
::: :: ::::::::::::::
query 3' AGUUGAACCGACUAGGACU 5'
query=miR3434-3p, target=R03G_11190, score=3.5, range=1274-1292,
strand=-1
target 5' UCCGCUUGGCUGAUUCUUGC 3'
:: .:::::::::::
query 3' AGUUGAACCGACUAGGACU 5'
query=miR3434-3p, target=R03G_13248, score=3.5, range=443-460,
strand=-1
target 5' UCGACUUGGCUGAU-UUGA 3'
::::::::::: ::::
query 3' AGUUGAACCGACUAGGACU 5'
query=miR3434-3p, target=R03G_04594, score=3.5, range=778-796,
strand=-1
target 5' UAGACUUGCCUGAUCCUGA 3'
: .::::: ::::::::::
query 3' AGUUGAACCGACUAGGACU 5'
query=miR3434-3p, target=R03G_13067, score=4, range=665-683, stra
target 5' AUGACUUGGCUGGUCUUGA 3'
.:::::::::::
query 3' AGUUGAACCGACUAGGACU 5'
query=miR3434-3p, target=R03G_06633, score=4, range=206-224, stra
target 5' UUCAUUUGGUUGAUUCUGA 3'
.. ::::::::::::::
query 3' AGUUGAACCGACUAGGACU 5'
```

query=miR3434-3p, target=R03G\_05448, score=4, range=262-281, strand=1  
target 5' UUGACUGUGGCUGAUUUUGA 3'  
.....  
query 3' AGUUGA-ACCGACUAGGACU 5'  
query=miR3434-3p, target=R03G\_05324, score=4, range=260-278, strand=1  
target 5' UUCAUUUGGUUGAUCCUGU 3'  
.. ..  
query 3' AGUUGAACCGACUAGGACU 5'  
query=miR3434-3p, target=R03G\_16217, score=4, range=683-701, strand=1  
target 5' UGAACUUGGCUGUUUCUGA 3'  
: ..  
query 3' AGUUGAACCGACUAGGACU 5'  
query=miR3434-3p, target=R03G\_02336, score=4, range=1985-2002, strand=1  
target 5' UCAACUUGGCUCAU-CUGA 3'  
.....  
query 3' AGUUGAACCGACUAGGACU 5'  
query=miR3434-3p, target=R03G\_09123, score=4, range=1149-1166, strand=1  
target 5' UAAAC-UGGUUGAUCUUGA 3'  
: ::: ..  
query 3' AGUUGAACCGACUAGGACU 5'  
query=miR3434-3p, target=R03G\_14740, score=4, range=603-620, strand=1  
target 5' UCAG-UUGGCUGAUCGUGG 3'  
.... ..  
query 3' AGUUGAACCGACUAGGACU 5'  
query=miR3434-3p, target=R03G\_03676, score=4, range=156-173, strand=1  
target 5' UGGAUUU-GCUGAUCCUGA 3'  
: ..: ..  
query 3' AGUUGAACCGACUAGGACU 5'  
query=miR3434-3p, target=R03G\_07431, score=4, range=14-31, strand=1  
target 5' UUAACUUGGCU-AUCUUGG 3'  
.....  
query 3' AGUUGAACCGACUAGGACU 5'  
query=miR3434-3p, target=R03G\_00826, score=4, range=422-440, strand=1  
target 5' UCACCGUGACUGAUCCUGA 3'  
::: : :: ..  
query 3' AGUUGAACCGACUAGGACU 5'  
query=miR3434-3p, target=R03G\_15224, score=4, range=423-440, strand=1  
target 5' GCAA-UUGGAUGAUCCUGA 3'  
::: ::: ..  
query 3' AGUUGAACCGACUAGGACU 5'  
query=miR3434-3p, target=R03G\_12160, score=4, range=77-94, strand=1  
target 5' UCGGC-UGGCUGAUCCUUA 3'  
..... :

query 3' AGUUGAACCGACUAGGACU 5'  
query=miR3434-3p, target=R03G\_09400, score=4, range=432-449, strand=1  
target 5' UCAGC-UGGCUGAUCGUGG 3'  
.....::

query 3' AGUUGAACCGACUAGGACU 5'  
query=miR3434-3p, target=R03G\_09422, score=4, range=1690-1708, strand=-1  
target 5' UCAAAUUGGCUGAUUUUGU 3'  
:::: ::::::::::::::

query 3' AGUUGAACCGACUAGGACU 5'  
query=miR3434-3p, target=R03G\_10613, score=4, range=1568-1586, strand=-1  
target 5' UUGACUUGGCUGAUCAUGU 3'  
.....::

query 3' AGUUGAACCGACUAGGACU 5'  
query=miR3434-3p, target=R03G\_10979, score=4, range=1133-1151, strand=-1  
target 5' UCGCUUUGGUUGAUCCUGU 3'  
:: .::::::::::::

query 3' AGUUGAACCGACUAGGACU 5'  
query=miR3434-3p, target=R03G\_10566, score=4, range=93-112, strand=1  
target 5' UUGACAUUGGCUGAUCUUGC 3'  
:::: ::::::::::::::

query 3' AGUUG-AACCGACUAGGACU 5'  
query=miR3434-3p, target=R03G\_08260, score=4, range=345-362, strand=1  
target 5' UCAAC-UGGCUUAUCCUGU 3'  
:::: ::::::::::::::

query 3' AGUUGAACCGACUAGGACU 5'  
query=miR1115-5p, target=R03G\_13445, score=4, range=524-545, strand=1  
target 5' AUACAAAUAGGCCAGUACCUCG 3'  
.:: :: ::::::::::::::

query 3' GGUGGUU-UCCGGUCAUGGAGU 5'  
query=miR1115-5p, target=R03G\_00733, score=4, range=242-261, strand=1  
target 5' UAACCGAAGGCCA-UACCUCA 3'  
. :::::::::::::: ::::::::::

query 3' GGUGGUU-UCCGGUCAUGGAGU 5'  
query=miR4348c, target=R03G\_16361, score=0, range=869-890, strand=1  
target 5' UGGUCUCUCCAAGGUUUAACA 3'  
:::: ::::::::::::::

query 3' ACCAGAGAAGGUUCCAAAUUGU 5'  
query=miR4348c, target=R03G\_04126, score=0, range=869-890, strand=1  
target 5' UGGUCUCUCCAAGGUUUAACA 3'  
:::: ::::::::::::::

query 3' ACCAGAGAAGGUUCCAAAUUGU 5'  
query=miR4348c, target=R03G\_17422, score=0, range=170-191, strand=1



```
:: :::: :::::::::::::::
query 3' ACCAGAGAAGGUUCCAAAUUGU 5'
query=miR1870-5p, target=R03G_15268, score=0, range=1663-1684,
strand=1
target 5' AUGCCACUGGUCCAUUCAGCAA 3'
::::::::::::::::::
query 3' UACGGUGACCAGGUAAGUCGUU 5'
query=miR1870-5p, target=R03G_04121, score=0, range=1663-1684,
strand=1
target 5' AUGCCACUGGUCCAUUCAGCAA 3'
::::::::::::::::::
query 3' UACGGUGACCAGGUAAGUCGUU 5'
query=miR1870-5p, target=R03G_13217, score=0, range=1663-1684,
strand=1
target 5' AUGCCACUGGUCCAUUCAGCAA 3'
::::::::::::::::::
query 3' UACGGUGACCAGGUAAGUCGUU 5'
query=miR1870-5p, target=R03G_15265, score=0, range=1663-1684,
strand=1
target 5' AUGCCACUGGUCCAUUCAGCAA 3'
::::::::::::::::::
query 3' UACGGUGACCAGGUAAGUCGUU 5'
query=miR1870-5p, target=R03G_14352, score=0, range=1663-1684,
strand=1
target 5' AUGCCACUGGUCCAUUCAGCAA 3'
::::::::::::::::::
query 3' UACGGUGACCAGGUAAGUCGUU 5'
query=miR1870-5p, target=R03G_13222, score=0, range=1657-1678,
strand=1
target 5' AUGCCACUGGUCCAUUCAGCAA 3'
::::::::::::::::::
query 3' UACGGUGACCAGGUAAGUCGUU 5'
query=miR1870-5p, target=R03G_13219, score=0, range=1663-1684,
strand=1
target 5' AUGCCACUGGUCCAUUCAGCAA 3'
::::::::::::::::::
query 3' UACGGUGACCAGGUAAGUCGUU 5'
query=miR1870-5p, target=R03G_16818, score=0, range=1405-1426,
strand=1
target 5' AUGCCACUGGUCCAUUCAGCAA 3'
::::::::::::::::::
query 3' UACGGUGACCAGGUAAGUCGUU 5'
query=miR1870-5p, target=R03G_05640, score=0, range=1411-1432,
strand=1
target 5' AUGCCACUGGUCCAUUCAGCAA 3'
```

query 3' UACGGUGACCAGGUAAGUCGUU 5'  
query=miR1870-5p, target=R03G\_15266, score=0, range=1663-1684,  
strand=1  
target 5' AUGCCACUGGUCCAUCAGCAA 3'

query 3' UACGGUGACCAGGUAAGUCGUU 5'  
query=miR1870-5p, target=R03G\_03992, score=0, range=394-415, str  
target 5' AUGCCACUGGUCCAUCAGCAA 3'

query 3' UACGGUGACCAGGUAAGUCGUU 5'  
query=miR1870-5p, target=R03G\_16797, score=0, range=664-685, stra  
target 5' AUGCCACUGGUCCAUCAGCAA 3'

query 3' UACGGUGACCAGGUAAGUCGUU 5'  
query=miR1870-5p, target=R03G\_11967, score=2, range=1675-1696,  
strand=1  
target 5' AUGCCACUGGUUCGUUCAGCAA 3'

query 3' UACGGUGACCAGGUAAGUCGUU 5'  
query=miR1870-5p, target=R03G\_13225, score=2, range=1675-1696,  
strand=1  
target 5' AUGCCACUGGUUCGUUCAGCAA 3'

query 3' UACGGUGACCAGGUAAGUCGUU 5'  
query=miR1870-5p, target=R03G\_16800, score=4, range=1663-1684,  
strand=1  
target 5' AUGCCACUGGUUCGCUCAGCAA 3'

query 3' UACGGUGACCAGGUAAGUCGUU 5'  
query=miR1870-5p, target=R03G\_08855, score=4, range=914-935, stra  
target 5' ACGCCACAGGUCCAUCAGUGA 3'

query 3' UACGGUGACCAGGUAAGUCGUU 5'  
query=miR2905, target=R03G\_15711, score=0, range=2375-2394, stran  
target 5' UGCCUUUGUCGGCUACAGUA 3'

query 3' ACGGAAACAGCCGAUGUCAU 5'  
query=miR2905, target=R03G\_13796, score=0, range=2375-2394, stran  
target 5' UGCCUUUGUCGGCUACAGUA 3'

query 3' ACGGAAACAGCCGAUGUCAU 5'  
query=miR2905, target=R03G\_09539, score=0, range=2375-2394, stran  
target 5' UGCCUUUGUCGGCUACAGUA 3'



query 3' ACGGAAACAGCCGAUGUCAU 5'  
query=miR2905, target=R03G\_11521, score=0, range=1337-1356, stran  
target 5' UGCCUUUGUCGGCUACAGUA 3'  
.....  
query 3' ACGGAAACAGCCGAUGUCAU 5'  
query=miR2905, target=R03G\_03627, score=2.5, range=392-411, stran  
target 5' UUCAUUGUCGGCUACAGUG 3'  
: :: .....  
query 3' ACGGAAACAGCCGAUGUCAU 5'  
query=miR2905, target=R03G\_01708, score=2.5, range=392-411, stran  
target 5' UUCAUUGUCGGCUACAGUG 3'  
: :: .....  
query 3' ACGGAAACAGCCGAUGUCAU 5'  
query=miR2905, target=R03G\_11026, score=3.5, range=657-676, stran  
target 5' UGCUUUUGUUGGCUAUGGUA 3'  
.....  
query 3' ACGGAAACAGCCGAUGUCAU 5'  
query=miR5557-3p, target=R03G\_14978, score=0, range=111-130, stra  
target 5' UCAACAAGAUAAUGCAAGCA 3'  
.....  
query 3' AGUUGUUCUAUUACGUUCGU 5'  
query=miR5557-3p, target=R03G\_17249, score=0, range=630-649, stra  
target 5' UCAACAAGAUAAUGCAAGCA 3'  
.....  
query 3' AGUUGUUCUAUUACGUUCGU 5'  
query=miR5557-3p, target=R03G\_11527, score=0, range=111-130, stra  
target 5' UCAACAAGAUAAUGCAAGCA 3'  
.....  
query 3' AGUUGUUCUAUUACGUUCGU 5'  
query=miR5557-3p, target=R03G\_10774, score=0, range=672-691, stra  
target 5' UCAACAAGAUAAUGCAAGCA 3'  
.....  
query 3' AGUUGUUCUAUUACGUUCGU 5'  
query=miR5557-3p, target=R03G\_13270, score=0, range=705-724, stra  
target 5' UCAACAAGAUAAUGCAAGCA 3'  
.....  
query 3' AGUUGUUCUAUUACGUUCGU 5'  
query=miR5557-3p, target=R03G\_17276, score=0, range=795-814, stra  
target 5' UCAACAAGAUAAUGCAAGCA 3'  
.....  
query 3' AGUUGUUCUAUUACGUUCGU 5'  
query=miR5557-3p, target=R03G\_03626, score=0, range=111-130, stra  
target 5' UCAACAAGAUAAUGCAAGCA 3'  
.....  
query 3' AGUUGUUCUAUUACGUUCGU 5'

query=miR5557-3p, target=R03G\_05935, score=0, range=111-130, stra  
target 5' UCAACAAGAUAAUGCAAGCA 3'  
:::::::::::::::::::::  
query 3' AGUUGUUCUAUUACGUUCGU 5'  
query=miR5557-3p, target=R03G\_01589, score=0, range=111-130, stra  
target 5' UCAACAAGAUAAUGCAAGCA 3'  
:::::::::::::::::::::  
query 3' AGUUGUUCUAUUACGUUCGU 5'  
query=miR5557-3p, target=R03G\_14547, score=0, range=111-130, stra  
target 5' UCAACAAGAUAAUGCAAGCA 3'  
:::::::::::::::::::::  
query 3' AGUUGUUCUAUUACGUUCGU 5'  
query=miR5557-3p, target=R03G\_00678, score=0, range=75-94, strand  
target 5' UCAACAAGAUAAUGCAAGCA 3'  
:::::::::::::::::::::  
query 3' AGUUGUUCUAUUACGUUCGU 5'  
query=miR5557-3p, target=R03G\_04790, score=0, range=111-130, stra  
target 5' UCAACAAGAUAAUGCAAGCA 3'  
:::::::::::::::::::::  
query 3' AGUUGUUCUAUUACGUUCGU 5'  
query=miR5557-3p, target=R03G\_13863, score=0, range=405-424, stra  
target 5' UCAACAAGAUAAUGCAAGCA 3'  
:::::::::::::::::::::  
query 3' AGUUGUUCUAUUACGUUCGU 5'  
query=miR5557-3p, target=R03G\_14363, score=0, range=663-682, stra  
target 5' UCAACAAGAUAAUGCAAGCA 3'  
:::::::::::::::::::::  
query 3' AGUUGUUCUAUUACGUUCGU 5'  
query=miR5557-3p, target=R03G\_10869, score=1, range=111-130, stra  
target 5' UCAACAUGAUAAUGCAAGCA 3'  
::::::: :::::::::::::::  
query 3' AGUUGUUCUAUUACGUUCGU 5'  
query=miR5557-3p, target=R03G\_03593, score=2, range=111-130, stra  
target 5' UCAACAAGAUAGUGCAGGCA 3'  
:::::::::::::::::::::  
query 3' AGUUGUUCUAUUACGUUCGU 5'  
query=miR5557-3p, target=R03G\_17259, score=2, range=111-130, stra  
target 5' UCAACAAGAUAAUGAAAGCA 3'  
::::::::::::::::::::: :::::  
query 3' AGUUGUUCUAUUACGUUCGU 5'  
query=miR5557-3p, target=R03G\_13921, score=2, range=111-130, stra  
target 5' UCAACAAGAUAAUGGAAGCA 3'  
::::::::::::::::::::: :::::  
query 3' AGUUGUUCUAUUACGUUCGU 5'  
query=miR5557-3p, target=R03G\_10734, score=2, range=111-130, stra



```
::::: ::::: :::
query 3' AGUUGUUCUAUUACGUUCGU 5'
query=miR5557-3p, target=R03G_03883, score=4, range=586-604, stra
target 5' UCAGC-AGAUA AUGCAAGAG 3'
::::: ::::: :::
query 3' AGUUGUUCUAUUACGUUCGU 5'
query=miR5557-3p, target=R03G_04024, score=4, range=209-227, stra
target 5' UGAACAAGAUGAU-CAAGCA 3'
: ::::: :::
query 3' AGUUGUUCUAUUACGUUCGU 5'
query=miR5557-3p, target=R03G_12622, score=4, range=1143-1162,
strand=-1
target 5' UGAACAAGAUGAUGUAAGUA 3'
: ::::: :::
query 3' AGUUGUUCUAUUACGUUCGU 5'
query=miR5557-3p, target=R03G_02506, score=4, range=2209-2228,
strand=-1
target 5' UCAACAAGAGAAUGCAAGUU 3'
::::: :::::
query 3' AGUUGUUCUAUUACGUUCGU 5'
query=miR5557-3p, target=R03G_01224, score=4, range=369-388, stra
target 5' UCUGCUGGAUAAUGCAGGCA 3'
:: .: :::::
query 3' AGUUGUUCUAUUACGUUCGU 5'
query=miR5557-3p, target=R03G_01221, score=4, range=369-388, stra
target 5' UCUGCUGGAUAAUGCAGGCA 3'
:: .: :::::
query 3' AGUUGUUCUAUUACGUUCGU 5'
query=miR5557-3p, target=R03G_02795, score=4, range=491-509, stra
target 5' CGAACAAGAUAAUG-AAGCA 3'
::::: :::::
query 3' AGUUGUUCUAUUACGUUCGU 5'
query=miR5557-3p, target=R03G_02641, score=4, range=1145-1163,
strand=-1
target 5' UCUGC-AGAUAGUGCAAGCG 3'
:: .: :::::
query 3' AGUUGUUCUAUUACGUUCGU 5'
query=miR8135, target=R03G_12402, score=0, range=438-456, strand=
target 5' AUCACCAAGCAUAAAUCCU 3'
::::: :::::
query 3' UAGUGGUUCGUUUUAGGA 5'
query=miR8135, target=R03G_15434, score=2, range=3444-3462, stran
target 5' AUUUCUAAGCAUAAAUCCU 3'
:: .: :::::
query 3' UAGUGGUUCGUUUUAGGA 5'
```

query=miR8135, target=R03G\_13681, score=2.5, range=262-280, stran  
target 5' AUCGGCAAGCAUAAAUCGG 3'  
:::: :::::::::::::::  
query 3' UAGUGGUUCGUAUUUAGGA 5'  
query=miR8135, target=R03G\_05681, score=3.5, range=1158-1176,  
strand=-1  
target 5' AUUACCACGCAUAAAUUCU 3'  
::::: :::::::::::::::  
query 3' UAGUGGUUCGUAUUUAGGA 5'  
query=miR8135, target=R03G\_11062, score=3.5, range=308-327, stran  
target 5' AUGCAUCAAGUAUAAAUCCA 3'  
:: :::::::::::::::  
query 3' UA-GUGGUUCGUAUUUAGGA 5'  
query=miR8135, target=R03G\_10706, score=3.5, range=219-236, stran  
target 5' AUCAAUAAGCAU-AAUCCU 3'  
:::: :::::::::::::::  
query 3' UAGUGGUUCGUAUUUAGGA 5'  
query=miR8135, target=R03G\_11749, score=4, range=1572-1590, stran  
target 5' AUUAUCAGGCAUAAAUUCA 3'  
::::: :::::::::::::::  
query 3' UAGUGGUUCGUAUUUAGGA 5'  
query=miR8135, target=R03G\_05601, score=4, range=1113-1131, stran  
target 5' UUCACCAGGCAUAAACCCU 3'  
::::: :::::::::::::::  
query 3' UAGUGGUUCGUAUUUAGGA 5'  
query=miR8135, target=R03G\_15222, score=4, range=2086-2103, stran  
target 5' AUC-CCAAGCGUAAAUUUU 3'  
::: :::::::::::::::  
query 3' UAGUGGUUCGUAUUUAGGA 5'  
query=miR8135, target=R03G\_05297, score=4, range=2603-2621, stran  
target 5' AACACCAAGCAGAAAUCUU 3'  
: :::::::::::::::  
query 3' UAGUGGUUCGUAUUUAGGA 5'  
query=miR8135, target=R03G\_00647, score=4, range=4399-4416, stran  
target 5' AUC-UUAAGCAUGGAUCCU 3'  
::: :::::::::::::::  
query 3' UAGUGGUUCGUAUUUAGGA 5'  
query=miR8135, target=R03G\_10979, score=4, range=298-315, strand=  
target 5' AUU-UCAAGCAUGAAUUCU 3'  
::: :::::::::::::::  
query 3' UAGUGGUUCGUAUUUAGGA 5'  
query=miR8135, target=R03G\_15836, score=4, range=75-94, strand=1  
target 5' ACCAUCGAGCAUAAAUACCU 3'  
: :::::::::::::::  
query 3' UAGUGGUUCGUAUUUA-GGA 5'

query=miR8135, target=R03G\_07416, score=4, range=10-27, strand=1  
target 5' AUUAUCAAGCAU-AAUCCA 3'  
.....: :  
query 3' UAGUGGUUCGUAUUUAGGA 5'  
query=miR8135, target=R03G\_03230, score=4, range=197-216, strand=  
target 5' CUCAAGCAAGCAUAAAUCCA 3'  
: : : : : : : : : : : : : : : : : :  
query 3' UAG-UGGUUCGUAUUUAGGA 5'  
query=miR8135, target=R03G\_16550, score=4, range=848-865, strand=  
target 5' AUC-CGAAGCAUAAGUCCA 3'  
: : : : : : : : : : : : : : : : : :  
query 3' UAGUGGUUCGUAUUUAGGA 5'  
query=miR8135, target=R03G\_12166, score=4, range=737-754, strand=  
target 5' AUC-CGAAGCAUAAGUCCA 3'  
: : : : : : : : : : : : : : : : : :  
query 3' UAGUGGUUCGUAUUUAGGA 5'  
query=miR8135, target=R03G\_08847, score=4, range=737-754, strand=  
target 5' AUC-CGAAGCAUAAGUCCA 3'  
: : : : : : : : : : : : : : : : : :  
query 3' UAGUGGUUCGUAUUUAGGA 5'  
query=miR8135, target=R03G\_16751, score=4, range=326-343, strand=  
target 5' AUC-CGAAGCAUAAGUCCA 3'  
: : : : : : : : : : : : : : : : : :  
query 3' UAGUGGUUCGUAUUUAGGA 5'  
query=miR8135, target=R03G\_03603, score=4, range=176-193, strand=  
target 5' AUC-CGAAGCAUAAGUCCA 3'  
: : : : : : : : : : : : : : : : : :  
query 3' UAGUGGUUCGUAUUUAGGA 5'  
query=miR8135, target=R03G\_12240, score=4, range=573-591, strand=  
target 5' AUCACCAGGUAAAAAUCCU 3'  
: : : : : : : : : : : : : : : : : :  
query 3' UAGUGGUUCGUAUUUAGGA 5'  
query=miR8135, target=R03G\_13465, score=4, range=1551-1569, stran  
target 5' UUCACCAAGCAUGAAUUCA 3'  
: : : : : : : : : : : : : : : : : :  
query 3' UAGUGGUUCGUAUUUAGGA 5'  
query=miR8135, target=R03G\_11318, score=4, range=128-147, strand=  
target 5' UUUAUCAGAGCAUAAAUCCU 3'  
: : : : : : : : : : : : : : : : : :  
query 3' UAGUGGU-UCGUAUUUAGGA 5'  
query=miR8135, target=R03G\_14614, score=4, range=343-361, strand=  
target 5' UUUGCAAAGCAUAAAUCUU 3'  
: : : : : : : : : : : : : : : : : :  
query 3' UAGUGGUUCGUAUUUAGGA 5'  
query=miR8135, target=R03G\_11170, score=4, range=158-175, strand=

target 5' AUUGCCAAGCAU-GAUCCU 3'  
:.....: .:..:  
query 3' UAGUGGUUCGUAUUUAGGA 5'  
query=miR8135, target=R03G\_11114, score=4, range=3850-3869, stran  
target 5' AACACCAAAGCAUAAUCCU 3'  
: :..: :.....: :..:  
query 3' UAGUGG-UUCGUAUUUAGGA 5'  
query=miR8135, target=R03G\_12314, score=4, range=1227-1245, stran  
target 5' AGCAACAAGCAUCAUCCU 3'  
: :. :.....: :.....:  
query 3' UAGUGGUUCGUAUUUAGGA 5'  
query=miR8135, target=R03G\_03692, score=4, range=622-639, strand=  
target 5' CUCCCCAAGCAUAAA-CCU 3'  
: :. :.....: :..:  
query 3' UAGUGGUUCGUAUUUAGGA 5'  
query=miR8135, target=R03G\_09208, score=4, range=831-850, strand=  
target 5' ACCUCCAAGCAUCAAUCCU 3'  
: :. :.....: :.....:  
query 3' UAGUGGUUCGUA-UUUAGGA 5'  
query=miR5241a, target=R03G\_11557, score=2, range=519-537, strand  
target 5' AUUCACUCUCCAUCAUCC 3'  
: :..: :.....: :.....:  
query 3' UAAGGGAGAAGGUAGUAGU 5'  
query=miR5241a, target=R03G\_17296, score=2.5, range=34-52, strand  
target 5' GAACCCUCUCCAUCAUCA 3'  
: :. :.....: :.....:  
query 3' UAAGGGAGAAGGUAGUAGU 5'  
query=miR5241a, target=R03G\_07498, score=2.5, range=750-767, stra  
target 5' AUUCCUUCU-CAUCAUCA 3'  
: :..: :.....: :.....:  
query 3' UAAGGGAGAAGGUAGUAGU 5'  
query=miR5241a, target=R03G\_05858, score=3, range=676-694, strand  
target 5' GUUAUCUCUCCAUUAUCA 3'  
: :..: :.....: :.....:  
query 3' UAAGGGAGAAGGUAGUAGU 5'  
query=miR5241a, target=R03G\_16310, score=3, range=1230-1248, stra  
target 5' AAGUUCUCUCCAUCAUCA 3'  
: :. :.....: :.....:  
query 3' UAAGGGAGAAGGUAGUAGU 5'  
query=miR5241a, target=R03G\_13602, score=3, range=128-146, strand  
target 5' AUGCUUCUCCAUUCGUCA 3'  
: :. :.....: :.....:  
query 3' UAAGGGAGAAGGUAGUAGU 5'  
query=miR5241a, target=R03G\_04050, score=3.5, range=1258-1276,  
strand=1

target 5' UUUCCUUCUUCUAUCGUCA 3'  
:~::~:  
query 3' UAAGGGAGAAGGUAGUAGU 5'  
query=miR5241a, target=R03G\_00301, score=3.5, range=2542-2560,  
strand=1  
target 5' UUUCCUUCUUCUAUCGUCA 3'  
:~::~:  
query 3' UAAGGGAGAAGGUAGUAGU 5'  
query=miR5241a, target=R03G\_12949, score=3.5, range=703-721, stra  
target 5' UUUCCUUCUUCUAUCGUCA 3'  
:~::~:  
query 3' UAAGGGAGAAGGUAGUAGU 5'  
query=miR5241a, target=R03G\_15056, score=3.5, range=427-445, stra  
target 5' GUUCCUCUUUCAUCGUCC 3'  
.~::~:  
query 3' UAAGGGAGAAGGUAGUAGU 5'  
query=miR5241a, target=R03G\_09951, score=3.5, range=108-126, stra  
target 5' AUUCUCUCCUUCAUCAUCA 3'  
:~::~:  
query 3' UAAGGGAGAAGGUAGUAGU 5'  
query=miR5241a, target=R03G\_01868, score=3.5, range=196-214, stra  
target 5' UCUCCUUUUCCAUCAUCG 3'  
:~::~:  
query 3' UAAGGGAGAAGGUAGUAGU 5'  
query=miR5241a, target=R03G\_17322, score=3.5, range=839-857, stra  
target 5' UUUCCUUGUCCAUCAUCA 3'  
:~::~:  
query 3' UAAGGGAGAAGGUAGUAGU 5'  
query=miR5241a, target=R03G\_07919, score=3.5, range=839-857, stra  
target 5' UUUCCUUGUCCAUCAUCA 3'  
:~::~:  
query 3' UAAGGGAGAAGGUAGUAGU 5'  
query=miR5241a, target=R03G\_05129, score=3.5, range=839-857, stra  
target 5' UUUCCUUGUCCAUCAUCA 3'  
:~::~:  
query 3' UAAGGGAGAAGGUAGUAGU 5'  
query=miR5241a, target=R03G\_11990, score=3.5, range=839-857, stra  
target 5' UUUCCUUGUCCAUCAUCA 3'  
:~::~:  
query 3' UAAGGGAGAAGGUAGUAGU 5'  
query=miR5241a, target=R03G\_00002, score=3.5, range=839-857, stra  
target 5' UUUCCUUGUCCAUCAUCA 3'  
:~::~:  
query 3' UAAGGGAGAAGGUAGUAGU 5'  
query=miR5241a, target=R03G\_12352, score=3.5, range=839-857, stra



```

target 5' UUUCCUUGUCCAUCAUCA 3'
:~::~: ~::~:
query 3' UAAGGGAGAAGGUAGUAGU 5'
query=miR5241a, target=R03G_10082, score=3.5, range=839-857, str
target 5' UUUCCUUGUCCAUCAUCA 3'
:~::~: ~::~:
query 3' UAAGGGAGAAGGUAGUAGU 5'
query=miR5241a, target=R03G_13707, score=3.5, range=839-857, str
target 5' UUUCCUUGUCCAUCAUCA 3'
:~::~: ~::~:
query 3' UAAGGGAGAAGGUAGUAGU 5'
query=miR5241a, target=R03G_01112, score=3.5, range=839-857, str
target 5' UUUCCUUGUCCAUCAUCA 3'
:~::~: ~::~:
query 3' UAAGGGAGAAGGUAGUAGU 5'
query=miR5241a, target=R03G_07318, score=3.5, range=839-857, str
target 5' UUUCCUUGUCCAUCAUCA 3'
:~::~: ~::~:
query 3' UAAGGGAGAAGGUAGUAGU 5'
query=miR5241a, target=R03G_16076, score=3.5, range=839-857, str
target 5' UUUCCUUGUCCAUCAUCA 3'
:~::~: ~::~:
query 3' UAAGGGAGAAGGUAGUAGU 5'
query=miR5241a, target=R03G_05128, score=3.5, range=839-857, str
target 5' UUUCCUUGUCCAUCAUCA 3'
:~::~: ~::~:
query 3' UAAGGGAGAAGGUAGUAGU 5'
query=miR5241a, target=R03G_05091, score=3.5, range=839-857, str
target 5' UUUCCUUGUCCAUCAUCA 3'
:~::~: ~::~:
query 3' UAAGGGAGAAGGUAGUAGU 5'
query=miR5241a, target=R03G_05692, score=3.5, range=839-857, str
target 5' UUUCCUUGUCCAUCAUCA 3'
:~::~: ~::~:
query 3' UAAGGGAGAAGGUAGUAGU 5'
query=miR5241a, target=R03G_17348, score=3.5, range=839-857, str
target 5' UUUCCUUGUCCAUCAUCA 3'
:~::~: ~::~:
query 3' UAAGGGAGAAGGUAGUAGU 5'
query=miR5241a, target=R03G_02948, score=3.5, range=839-857, str
target 5' UUUCCUUGUCCAUCAUCA 3'
:~::~: ~::~:
query 3' UAAGGGAGAAGGUAGUAGU 5'
query=miR5241a, target=R03G_08729, score=3.5, range=839-857, str
target 5' UUUCCUUGUCCAUCAUCA 3'

```

::::: :  
query 3' UAAGGGAGAAGGUAGUAGU 5'  
query=miR5241a, target=R03G\_03722, score=3.5, range=839-857, str  
target 5' UUUCCUUGUCCAUCAUCA 3'  
::::: :  
query 3' UAAGGGAGAAGGUAGUAGU 5'  
query=miR5241a, target=R03G\_14908, score=3.5, range=839-857, str  
target 5' UUUCCUUGUCCAUCAUCA 3'  
::::: :  
query 3' UAAGGGAGAAGGUAGUAGU 5'  
query=miR5241a, target=R03G\_17221, score=3.5, range=839-857, str  
target 5' UUUCCUUGUCCAUCAUCA 3'  
::::: :  
query 3' UAAGGGAGAAGGUAGUAGU 5'  
query=miR5241a, target=R03G\_17389, score=3.5, range=839-857, str  
target 5' UUUCCUUGUCCAUCAUCA 3'  
::::: :  
query 3' UAAGGGAGAAGGUAGUAGU 5'  
query=miR5241a, target=R03G\_04035, score=3.5, range=839-857, str  
target 5' UUUCCUUGUCCAUCAUCA 3'  
::::: :  
query 3' UAAGGGAGAAGGUAGUAGU 5'  
query=miR5241a, target=R03G\_03986, score=3.5, range=839-857, str  
target 5' UUUCCUUGUCCAUCAUCA 3'  
::::: :  
query 3' UAAGGGAGAAGGUAGUAGU 5'  
query=miR5241a, target=R03G\_04027, score=3.5, range=839-857, str  
target 5' UUUCCUUGUCCAUCAUCA 3'  
::::: :  
query 3' UAAGGGAGAAGGUAGUAGU 5'  
query=miR5241a, target=R03G\_14748, score=3.5, range=839-857, str  
target 5' UUUCCUUGUCCAUCAUCA 3'  
::::: :  
query 3' UAAGGGAGAAGGUAGUAGU 5'  
query=miR5241a, target=R03G\_00400, score=3.5, range=839-857, str  
target 5' UUUCCUUGUCCAUCAUCA 3'  
::::: :  
query 3' UAAGGGAGAAGGUAGUAGU 5'  
query=miR5241a, target=R03G\_13483, score=3.5, range=839-857, str  
target 5' UUUCCUUGUCCAUCAUCA 3'  
::::: :  
query 3' UAAGGGAGAAGGUAGUAGU 5'  
query=miR5241a, target=R03G\_06439, score=3.5, range=836-854, str  
target 5' UUUCCUUGUCCAUCAUCA 3'  
::::: :

```

query 3' UAAGGGAGAAGGUAGUAGU 5'
query=miR5241a, target=R03G_05090, score=3.5, range=839-857, stra
target 5' UUUCCUUGUCCAUCAUCA 3'
.....:
query 3' UAAGGGAGAAGGUAGUAGU 5'
query=miR5241a, target=R03G_13265, score=3.5, range=839-857, stra
target 5' UUUCCUUGUCCAUCAUCA 3'
.....:
query 3' UAAGGGAGAAGGUAGUAGU 5'
query=miR5241a, target=R03G_14037, score=3.5, range=195-213, stra
target 5' UUUCUCUCGUCCAUCAUCA 3'
.....:
query 3' UAAGGGAGAAGGUAGUAGU 5'
query=miR5241a, target=R03G_02172, score=3.5, range=992-1009, str
target 5' GUUUUC-CUCCAUCAUCA 3'
.....:
query 3' UAAGGGAGAAGGUAGUAGU 5'
query=miR5241a, target=R03G_01269, score=3.5, range=184-202, stra
target 5' UAUCAUUCUCCAUCAUCA 3'
:: .....:
query 3' UAAGGGAGAAGGUAGUAGU 5'
query=miR5241a, target=R03G_14004, score=3.5, range=815-832, stra
target 5' AUUUAC-CUCCAUCAUCA 3'
.... : .....:
query 3' UAAGGGAGAAGGUAGUAGU 5'
query=miR5241a, target=R03G_13481, score=3.5, range=750-768, stra
target 5' UUUCUCUUUUCCAUAUCA 3'
.....:
query 3' UAAGGGAGAAGGUAGUAGU 5'
query=miR5241a, target=R03G_09440, score=3.5, range=768-786, stra
target 5' AUUCCUUUUCCAUCGUCU 3'
.....:
query 3' UAAGGGAGAAGGUAGUAGU 5'
query=miR5241a, target=R03G_06881, score=3.5, range=30-48, strand
target 5' CUUCCUCUCCGUCAUCC 3'
.....:
query 3' UAAGGGAGAAGGUAGUAGU 5'
query=miR5241a, target=R03G_02114, score=3.5, range=480-498, stra
target 5' UGUCUCUCUUUCAUCAUCA 3'
.....:
query 3' UAAGGGAGAAGGUAGUAGU 5'
query=miR5241a, target=R03G_09478, score=3.5, range=2519-2537,
strand=-1
target 5' UUUCCGUCUCCAUCAUUG 3'
....:

```

query 3' UAAGGGAGAAGGUAGUAGU 5'  
query=miR5241a, target=R03G\_05842, score=3.5, range=1616-1634,  
strand=-1  
target 5' UCUUCCUCUCCAUCAUCU 3'  
:.....  
query 3' UAAGGGAGAAGGUAGUAGU 5'  
query=miR5241a, target=R03G\_02881, score=3.5, range=7667-7685,  
strand=-1  
target 5' AUUUGCUCUCCUUCAUCA 3'  
:.. :..... :.....  
query 3' UAAGGGAGAAGGUAGUAGU 5'  
query=miR5241a, target=R03G\_12763, score=3.5, range=1478-1497,  
strand=-1  
target 5' AUCUCCUCUCCAUCACCA 3'  
: :..... : :  
query 3' UAAGGGAGAAGGUAGUAGU 5'  
query=miR5241a, target=R03G\_01141, score=3.5, range=81-98, strand  
target 5' AUUCCUUCUCC-UCAUCC 3'  
:..... : :  
query 3' UAAGGGAGAAGGUAGUAGU 5'  
query=miR5241a, target=R03G\_01137, score=3.5, range=1046-1064,  
strand=-1  
target 5' ACUUGCUCUCCAUCAUCU 3'  
: :. :..... : :  
query 3' UAAGGGAGAAGGUAGUAGU 5'  
query=miR5241a, target=R03G\_01422, score=3.5, range=564-581, stra  
target 5' ACUCCUUCUU-CAUCAUCA 3'  
: :..... : :  
query 3' UAAGGGAGAAGGUAGUAGU 5'  
query=miR5241a, target=R03G\_07756, score=3.5, range=1227-1244,  
strand=-1  
target 5' AUAUCCUCUU-CAUCAUCA 3'  
: :. :..... : :  
query 3' UAAGGGAGAAGGUAGUAGU 5'  
query=miR5241a, target=R03G\_01230, score=4, range=424-442, strand  
target 5' UUUUUUUUUCCAUCAUCA 3'  
:.. :..... : :  
query 3' UAAGGGAGAAGGUAGUAGU 5'  
query=miR5241a, target=R03G\_00344, score=4, range=1373-1392, stra  
target 5' CUUCUUCUCUCCAUCAUUG 3'  
:.. :..... : :  
query 3' UAAG-GGAGAAGGUAGUAGU 5'  
query=miR5241a, target=R03G\_07775, score=4, range=1405-1423, stra  
target 5' UCUUCUUCUCCAUCAUCU 3'  
:..... : :  
:.....

query 3' UAAGGGAGAAGGUAGUAGU 5'  
query=miR5241a, target=R03G\_06122, score=4, range=964-982, strand  
target 5' AUUCACUCAUCAUCAUCA 3'  
:::: :::: ::::: :::::  
query 3' UAAGGGAGAAGGUAGUAGU 5'  
query=miR5241a, target=R03G\_16590, score=4, range=1572-1591, stra  
target 5' AUCUCCUUCUCCAUCCUCG 3'  
:: ::::: ::::: :::  
query 3' UA-AGGGAGAAGGUAGUAGU 5'  
query=miR5241a, target=R03G\_06182, score=4, range=403-421, strand  
target 5' CCUACCUCUUCUAUCAUCA 3'  
: ::::: ::::: :::  
query 3' UAAGGGAGAAGGUAGUAGU 5'  
query=miR5241a, target=R03G\_12564, score=4, range=265-282, strand  
target 5' GUUCCUCUUCUCC-UCAUCU 3'  
..... :::::  
query 3' UAAGGGAGAAGGUAGUAGU 5'  
query=miR5241a, target=R03G\_14159, score=4, range=431-448, strand  
target 5' AUUUUAUUCUU-CAUCAUCA 3'  
:::: .:::: ::::: :::  
query 3' UAAGGGAGAAGGUAGUAGU 5'  
query=miR5241a, target=R03G\_17338, score=4, range=597-615, strand  
target 5' AUUUUCUUUUUCAUCAUCU 3'  
..... :::::  
query 3' UAAGGGAGAAGGUAGUAGU 5'  
query=miR5241a, target=R03G\_03732, score=4, range=356-374, strand  
target 5' CUUCUCUCUCCAUCCUCG 3'  
::::: ::::: :::  
query 3' UAAGGGAGAAGGUAGUAGU 5'  
query=miR5241a, target=R03G\_00543, score=4, range=681-700, strand  
target 5' CUUCCUCUUUUUCAUCAUCA 3'  
::::: ::::: :::::  
query 3' UAAGG-GAGAAGGUAGUAGU 5'  
query=miR5241a, target=R03G\_06842, score=4, range=3092-3111, stra  
target 5' AUCUCCUCUCCAUCAUGG 3'  
:: ::::: ::::: .  
query 3' UA-AGGGAGAAGGUAGUAGU 5'  
query=miR5241a, target=R03G\_07550, score=4, range=1409-1427, stra  
target 5' AUUUGUCCUCCAUCAUCA 3'  
:::: . ::::: :::::  
query 3' UAAGGGAGAAGGUAGUAGU 5'  
query=miR5241a, target=R03G\_06592, score=4, range=1403-1421, stra  
target 5' AUUUGUCCUCCAUCAUCA 3'  
:::: . ::::: :::::  
query 3' UAAGGGAGAAGGUAGUAGU 5'

```
query=miR5241a, target=R03G_12732, score=4, range=1217-1235, strand=+
target 5' AAUCCUCUUCUCCAUCAUGG 3'
: :::::::::::::::::::: .
query 3' UAAGGGAGAAGGUAGUAGU 5'
query=miR5241a, target=R03G_06133, score=4, range=11-29, strand=-
target 5' AUAUCUUCUCCAUGAUGA 3'
:: .:::::::::::::::::: ::::
query 3' UAAGGGAGAAGGUAGUAGU 5'
query=miR5241a, target=R03G_10705, score=4, range=692-710, strand=+
target 5' AUAUCUUCUCCAACAUGA 3'
:: .:::::::::::::::::: ::::
query 3' UAAGGGAGAAGGUAGUAGU 5'
query=miR5241a, target=R03G_03189, score=4, range=365-384, strand=+
target 5' AUUCACAUCUUCUAUCGUCA 3'
:::: : ::::::::::::::::::::
query 3' UAAG-GGAGAAGGUAGUAGU 5'
query=miR5241a, target=R03G_15176, score=4, range=453-471, strand=+
target 5' AUUAGUUCUCCAUAUAUCG 3'
::: .::::::::::::::::::.
query 3' UAAGGGAGAAGGUAGUAGU 5'
query=miR5241a, target=R03G_09067, score=4, range=1872-1889, strand=+
target 5' AUUCUUUCUU-CAUCAUCU 3'
::::.::::: :::::::
query 3' UAAGGGAGAAGGUAGUAGU 5'
query=miR5241a, target=R03G_10851, score=4, range=969-986, strand=+
target 5' GUUCCUUCUU-CAUCAUCU 3'
.::::.::::: :::::::
query 3' UAAGGGAGAAGGUAGUAGU 5'
query=miR5241a, target=R03G_13254, score=4, range=192-209, strand=+
target 5' CUUCCUUCUCCAUC-UCG 3'
::::.::::.::::: ::.
query 3' UAAGGGAGAAGGUAGUAGU 5'
query=miR5241a, target=R03G_16011, score=4, range=549-567, strand=+
target 5' AUAGCCUUUUCCAUCAUCU 3'
:: ::.::::.::::.:::::
query 3' UAAGGGAGAAGGUAGUAGU 5'
query=miR5241a, target=R03G_11592, score=4, range=539-556, strand=+
target 5' CAUCCU-UCCAUCAUCA 3'
::::: ::.::::.::::.:::::
query 3' UAAGGGAGAAGGUAGUAGU 5'
query=miR5241a, target=R03G_03088, score=4, range=807-824, strand=+
target 5' ACUUCUUCUU-CAUCAUCA 3'
: .::::.::::: ::.::::.:::::
query 3' UAAGGGAGAAGGUAGUAGU 5'
query=miR5241a, target=R03G_02482, score=4, range=102-120, strand=+
```

```

target 5' AUGACGUCUUUCAUCAUCA 3'
:: : :::::::::::::::
query 3' UAAGGGAGAAGGUAGUAGU 5'
query=miR5241a, target=R03G_08714, score=4, range=347-366, strand
target 5' GUACGCGUCUCCAUCAUCG 3'
.: : : ::::::::::::::.
query 3' UAAG-GGAGAAGGUAGUAGU 5'
query=miR5241a, target=R03G_13397, score=4, range=261-278, strand
target 5' AUAUCCUCUU-CAUCAUCG 3'
:: .::::::::: ::::::::::.
query 3' UAAGGGAGAAGGUAGUAGU 5'
query=miR5241a, target=R03G_07178, score=4, range=975-992, strand
target 5' AUUUCUUCUU-CAUCGUCA 3'
::::.::::: ::::::::::
query 3' UAAGGGAGAAGGUAGUAGU 5'
query=miR1068, target=R03G_06442, score=0, range=6121-6142, stran
target 5' GACCUGCAAGCAAAACUGGCUA 3'
::::::::::::::::::::::::::
query 3' CUGGACGUUCGUUUUUGACCGAU 5'
query=miR1068, target=R03G_16557, score=0, range=397-418, strand=
target 5' GACCUGCAAGCAAAACUGGCUA 3'
::::::::::::::::::::::::::
query 3' CUGGACGUUCGUUUUUGACCGAU 5'
query=miR1068, target=R03G_07098, score=0, range=397-418, strand=
target 5' GACCUGCAAGCAAAACUGGCUA 3'
::::::::::::::::::::::::::
query 3' CUGGACGUUCGUUUUUGACCGAU 5'
query=miR1068, target=R03G_01745, score=0, range=397-418, strand=
target 5' GACCUGCAAGCAAAACUGGCUA 3'
::::::::::::::::::::::::::
query 3' CUGGACGUUCGUUUUUGACCGAU 5'
query=miR1068, target=R03G_05271, score=0, range=397-418, strand=
target 5' GACCUGCAAGCAAAACUGGCUA 3'
::::::::::::::::::::::::::
query 3' CUGGACGUUCGUUUUUGACCGAU 5'
query=miR1068, target=R03G_00290, score=0, range=397-418, strand=
target 5' GACCUGCAAGCAAAACUGGCUA 3'
::::::::::::::::::::::::::
query 3' CUGGACGUUCGUUUUUGACCGAU 5'
query=miR1068, target=R03G_15134, score=0, range=439-460, strand=
target 5' GACCUGCAAGCAAAACUGGCUA 3'
::::::::::::::::::::::::::
query 3' CUGGACGUUCGUUUUUGACCGAU 5'
query=miR1068, target=R03G_12470, score=0, range=397-418, strand=
target 5' GACCUGCAAGCAAAACUGGCUA 3'

```

query 3' CUGGACGUUCGUUUUGACCGAU 5'  
query=miR1068, target=R03G\_16132, score=0, range=397-418, strand=  
target 5' GACCUGCAAGCAAAAACUGGCUA 3'  
query 3' CUGGACGUUCGUUUUGACCGAU 5'  
query=miR1068, target=R03G\_01928, score=0, range=397-418, strand=  
target 5' GACCUGCAAGCAAAAACUGGCUA 3'  
query 3' CUGGACGUUCGUUUUGACCGAU 5'  
query=miR1068, target=R03G\_11525, score=0, range=397-418, strand=  
target 5' GACCUGCAAGCAAAAACUGGCUA 3'  
query 3' CUGGACGUUCGUUUUGACCGAU 5'  
query=miR1068, target=R03G\_00485, score=0, range=397-418, strand=  
target 5' GACCUGCAAGCAAAAACUGGCUA 3'  
query 3' CUGGACGUUCGUUUUGACCGAU 5'  
query=miR1068, target=R03G\_09479, score=0, range=397-418, strand=  
target 5' GACCUGCAAGCAAAAACUGGCUA 3'  
query 3' CUGGACGUUCGUUUUGACCGAU 5'  
query=miR1068, target=R03G\_09541, score=0, range=397-418, strand=  
target 5' GACCUGCAAGCAAAAACUGGCUA 3'  
query 3' CUGGACGUUCGUUUUGACCGAU 5'  
query=miR1068, target=R03G\_14995, score=0.5, range=397-418, stran  
target 5' GGCCUGCAAGCAAAAACUGGCUA 3'  
query 3' CUGGACGUUCGUUUUGACCGAU 5'  
query=miR1068, target=R03G\_02714, score=3.5, range=397-418, stran  
target 5' GACUUACAAGCAAAAACUAGCUA 3'  
query 3' CUGGACGUUCGUUUUGACCGAU 5'  
query=miR1068, target=R03G\_02962, score=3.5, range=182-202, stran  
target 5' AACUU-CAAGCAAAAACUGGCUU 3'  
query 3' CUGGACGUUCGUUUUGACCGAU 5'  
query=miR1068, target=R03G\_06842, score=4, range=5290-5311, stran  
target 5' GACUUGCAAGCAAAAACUGAUUG 3'  
query 3' CUGGACGUUCGUUUUGACCGAU 5'  
query=miR1068, target=R03G\_04655, score=4, range=1790-1811, stran  
target 5' GACAUGAAAGUAAAACUGGCUU 3'



query 3' CUGGACGUUCGUUUUGACCGAU 5'  
query=miR1068, target=R03G\_14692, score=4, range=524-546, strand=  
target 5' GACCUGCUGGGCAAACUCGCUA 3'  
.....  
query 3' CUGGACG-UUCGUUUUGACCGAU 5'  
query=miR9491, target=R03G\_16744, score=0, range=278-298, strand=  
target 5' CUGAGUCAGAGGAAGAUAGCA 3'  
.....  
query 3' GACUCAGUCUCCUUCUAUCGU 5'  
query=miR9491, target=R03G\_01203, score=0, range=278-298, strand=  
target 5' CUGAGUCAGAGGAAGAUAGCA 3'  
.....  
query 3' GACUCAGUCUCCUUCUAUCGU 5'  
query=miR9491, target=R03G\_11403, score=0, range=278-298, strand=  
target 5' CUGAGUCAGAGGAAGAUAGCA 3'  
.....  
query 3' GACUCAGUCUCCUUCUAUCGU 5'  
query=miR9491, target=R03G\_06416, score=0, range=278-298, strand=  
target 5' CUGAGUCAGAGGAAGAUAGCA 3'  
.....  
query 3' GACUCAGUCUCCUUCUAUCGU 5'  
query=miR9491, target=R03G\_01718, score=0, range=278-298, strand=  
target 5' CUGAGUCAGAGGAAGAUAGCA 3'  
.....  
query 3' GACUCAGUCUCCUUCUAUCGU 5'  
query=miR9491, target=R03G\_15869, score=0, range=278-298, strand=  
target 5' CUGAGUCAGAGGAAGAUAGCA 3'  
.....  
query 3' GACUCAGUCUCCUUCUAUCGU 5'  
query=miR9491, target=R03G\_10560, score=0, range=278-298, strand=  
target 5' CUGAGUCAGAGGAAGAUAGCA 3'  
.....  
query 3' GACUCAGUCUCCUUCUAUCGU 5'  
query=miR9491, target=R03G\_11275, score=0, range=278-298, strand=  
target 5' CUGAGUCAGAGGAAGAUAGCA 3'  
.....  
query 3' GACUCAGUCUCCUUCUAUCGU 5'  
query=miR9491, target=R03G\_14704, score=0, range=278-298, strand=  
target 5' CUGAGUCAGAGGAAGAUAGCA 3'  
.....  
query 3' GACUCAGUCUCCUUCUAUCGU 5'  
query=miR9491, target=R03G\_12979, score=0, range=278-298, strand=  
target 5' CUGAGUCAGAGGAAGAUAGCA 3'  
.....  
query 3' GACUCAGUCUCCUUCUAUCGU 5'

query=miR9491, target=R03G\_10555, score=0, range=278-298, strand=  
target 5' CUGAGUCAGAGGAAGAUAGCA 3'  
::::::::::::::::::::::::::  
query 3' GACUCAGUCUCCUUCUAUCGU 5'  
query=miR9491, target=R03G\_05280, score=0, range=278-298, strand=  
target 5' CUGAGUCAGAGGAAGAUAGCA 3'  
::::::::::::::::::::::::::  
query 3' GACUCAGUCUCCUUCUAUCGU 5'  
query=miR9491, target=R03G\_16686, score=0, range=278-298, strand=  
target 5' CUGAGUCAGAGGAAGAUAGCA 3'  
::::::::::::::::::::::::::  
query 3' GACUCAGUCUCCUUCUAUCGU 5'  
query=miR9491, target=R03G\_07305, score=0, range=278-298, strand=  
target 5' CUGAGUCAGAGGAAGAUAGCA 3'  
::::::::::::::::::::::::::  
query 3' GACUCAGUCUCCUUCUAUCGU 5'  
query=miR9491, target=R03G\_03103, score=0, range=278-298, strand=  
target 5' CUGAGUCAGAGGAAGAUAGCA 3'  
::::::::::::::::::::::::::  
query 3' GACUCAGUCUCCUUCUAUCGU 5'  
query=miR9491, target=R03G\_12087, score=0, range=278-298, strand=  
target 5' CUGAGUCAGAGGAAGAUAGCA 3'  
::::::::::::::::::::::::::  
query 3' GACUCAGUCUCCUUCUAUCGU 5'  
query=miR9491, target=R03G\_08612, score=0, range=278-298, strand=  
target 5' CUGAGUCAGAGGAAGAUAGCA 3'  
::::::::::::::::::::::::::  
query 3' GACUCAGUCUCCUUCUAUCGU 5'  
query=miR9491, target=R03G\_05630, score=0, range=278-298, strand=  
target 5' CUGAGUCAGAGGAAGAUAGCA 3'  
::::::::::::::::::::::::::  
query 3' GACUCAGUCUCCUUCUAUCGU 5'  
query=miR9491, target=R03G\_13450, score=0, range=278-298, strand=  
target 5' CUGAGUCAGAGGAAGAUAGCA 3'  
::::::::::::::::::::::::::  
query 3' GACUCAGUCUCCUUCUAUCGU 5'  
query=miR9491, target=R03G\_11970, score=0, range=278-298, strand=  
target 5' CUGAGUCAGAGGAAGAUAGCA 3'  
::::::::::::::::::::::::::  
query 3' GACUCAGUCUCCUUCUAUCGU 5'  
query=miR9491, target=R03G\_13152, score=0, range=278-298, strand=  
target 5' CUGAGUCAGAGGAAGAUAGCA 3'  
::::::::::::::::::::::::::  
query 3' GACUCAGUCUCCUUCUAUCGU 5'  
query=miR9491, target=R03G\_03988, score=0, range=278-298, strand=

target 5' CUGAGUCAGAGGAAGAUAGCA 3'  
 ::::::::::::::::::::

query 3' GACUCAGUCUCCUUCUAUCGU 5'  
 query=miR9491, target=R03G\_12951, score=0, range=278-298, strand=  
 target 5' CUGAGUCAGAGGAAGAUAGCA 3'  
 ::::::::::::::::::::

query 3' GACUCAGUCUCCUUCUAUCGU 5'  
 query=miR9491, target=R03G\_09376, score=0, range=278-298, strand=  
 target 5' CUGAGUCAGAGGAAGAUAGCA 3'  
 ::::::::::::::::::::

query 3' GACUCAGUCUCCUUCUAUCGU 5'  
 query=miR9491, target=R03G\_12194, score=0, range=278-298, strand=  
 target 5' CUGAGUCAGAGGAAGAUAGCA 3'  
 ::::::::::::::::::::

query 3' GACUCAGUCUCCUUCUAUCGU 5'  
 query=miR9491, target=R03G\_07104, score=0, range=278-298, strand=  
 target 5' CUGAGUCAGAGGAAGAUAGCA 3'  
 ::::::::::::::::::::

query 3' GACUCAGUCUCCUUCUAUCGU 5'  
 query=miR9491, target=R03G\_13861, score=0, range=278-298, strand=  
 target 5' CUGAGUCAGAGGAAGAUAGCA 3'  
 ::::::::::::::::::::

query 3' GACUCAGUCUCCUUCUAUCGU 5'  
 query=miR9491, target=R03G\_08632, score=3, range=503-523, strand=  
 target 5' GUGAAUCAGAGGAAGAUAGCU 3'  
 ::: ::::::::::::::::::::

query 3' GACUCAGUCUCCUUCUAUCGU 5'  
 query=miR9491, target=R03G\_12301, score=3.5, range=3578-3598, str  
 target 5' UUGACUUGGAGGAAGAUAGUA 3'  
 .::: :.::.:

query 3' GACUCAGUCUCCUUCUAUCGU 5'  
 query=miR2602a, target=R03G\_13914, score=0, range=737-755, strand  
 target 5' AUGCUGGCAAUCACUGGAA 3'  
 ::::::::::::::::::::

query 3' UACGACCGUAGUGACCUU 5'  
 query=miR2602a, target=R03G\_12058, score=0, range=737-755, strand  
 target 5' AUGCUGGCAAUCACUGGAA 3'  
 ::::::::::::::::::::

query 3' UACGACCGUAGUGACCUU 5'  
 query=miR2602a, target=R03G\_10801, score=0, range=542-560, strand  
 target 5' AUGCUGGCAAUCACUGGAA 3'  
 ::::::::::::::::::::

query 3' UACGACCGUAGUGACCUU 5'  
 query=miR2602a, target=R03G\_09614, score=0, range=68-86, strand=1  
 target 5' AUGCUGGCAAUCACUGGAA 3'

query 3' UACGACCGUUAGUGACCUU 5'  
query=miR2602a, target=R03G\_17462, score=0, range=869-887, strand  
target 5' AUGCUGGCAAUCACUGGAA 3'

query 3' UACGACCGUUAGUGACCUU 5'  
query=miR2602a, target=R03G\_02233, score=0, range=266-284, strand  
target 5' AUGCUGGCAAUCACUGGAA 3'

query 3' UACGACCGUUAGUGACCUU 5'  
query=miR2602a, target=R03G\_14983, score=1, range=542-560, strand  
target 5' AUGCUGGCAAUACUGGAA 3'

query 3' UACGACCGUUAGUGACCUU 5'  
query=miR2602a, target=R03G\_03583, score=1, range=542-560, strand  
target 5' ACGCUGGCAAUCACUGGAA 3'

query 3' UACGACCGUUAGUGACCUU 5'  
query=miR2602a, target=R03G\_03556, score=2, range=542-560, strand  
target 5' AUGCUGACAAUCACUGGAA 3'

query 3' UACGACCGUUAGUGACCUU 5'  
query=miR2602a, target=R03G\_13096, score=3, range=269-287, strand  
target 5' AUGGUGGCAGUCGCUGGAA 3'

query 3' UACGACCGUUAGUGACCUU 5'  
query=miR2602a, target=R03G\_12495, score=3, range=320-339, strand  
target 5' AUGCUUAGCAAUCACUGGAU 3'

query 3' UACG-ACCGUUAGUGACCUU 5'  
query=miR2602a, target=R03G\_06752, score=3.5, range=179-197, stra  
target 5' AUGAUGGUAUUACUGGAG 3'

query 3' UACGACCGUUAGUGACCUU 5'  
query=miR2602a, target=R03G\_10535, score=4, range=2123-2141, stra  
target 5' GUGUUGGCAAUGACUGGGA 3'

query 3' UACGACCGUUAGUGACCUU 5'  
query=miR2602a, target=R03G\_12181, score=4, range=1292-1310, stra  
target 5' GUGUUGGCAAUGACUGGGA 3'

query 3' UACGACCGUUAGUGACCUU 5'  
query=miR2602a, target=R03G\_15136, score=4, range=185-203, strand  
target 5' GUGUUGGCAAUGACUGGGA 3'

query 3' UACGACCGUUAGUGACCUU 5'  
query=miR2602a, target=R03G\_16143, score=4, range=4475-4493, strand  
target 5' GUGUUGGCAAUGACUGGGA 3'  
.....: :.....:  
query 3' UACGACCGUUAGUGACCUU 5'  
query=miR2602a, target=R03G\_02691, score=4, range=2924-2942, strand  
target 5' GUGUUGGCAAUGACUGGGA 3'  
.....: :.....:  
query 3' UACGACCGUUAGUGACCUU 5'  
query=miR2602a, target=R03G\_17318, score=4, range=4478-4496, strand  
target 5' GUGUUGGCAAUGACUGGGA 3'  
.....: :.....:  
query 3' UACGACCGUUAGUGACCUU 5'  
query=miR2602a, target=R03G\_05918, score=4, range=998-1016, strand  
target 5' GUGUUGGCAAUGACUGGGA 3'  
.....: :.....:  
query 3' UACGACCGUUAGUGACCUU 5'  
query=miR2602a, target=R03G\_12533, score=4, range=3818-3836, strand  
target 5' GUGUUGGCAAUGACUGGGA 3'  
.....: :.....:  
query 3' UACGACCGUUAGUGACCUU 5'  
query=miR2602a, target=R03G\_07028, score=4, range=3461-3479, strand  
target 5' GUGUUGGCAAUGACUGGGA 3'  
.....: :.....:  
query 3' UACGACCGUUAGUGACCUU 5'  
query=miR2602a, target=R03G\_05520, score=4, range=1145-1163, strand  
target 5' GUGUUGGCAAUGACUGGGA 3'  
.....: :.....:  
query 3' UACGACCGUUAGUGACCUU 5'  
query=miR2602a, target=R03G\_17383, score=4, range=977-995, strand  
target 5' GUGUUGGCAAUGACUGGGA 3'  
.....: :.....:  
query 3' UACGACCGUUAGUGACCUU 5'  
query=miR2602a, target=R03G\_17329, score=4, range=3815-3833, strand  
target 5' GUGUUGGCAAUGACUGGGA 3'  
.....: :.....:  
query 3' UACGACCGUUAGUGACCUU 5'  
query=miR2602a, target=R03G\_17274, score=4, range=4301-4319, strand  
target 5' GUGUUGGCAAUGACUGGGA 3'  
.....: :.....:  
query 3' UACGACCGUUAGUGACCUU 5'  
query=miR2602a, target=R03G\_17076, score=4, range=796-814, strand  
target 5' ACGUUGGCAAUUACUGGGG 3'  
: :.....:.....  
query 3' UACGACCGUUAGUGACCUU 5'



```
target 5' AGUGGGGUUUUGAUGCAUGUCA 3'
: : : : : : : : : : : : : : : : : :
query 3' UCACCCCAAACUACGUACAGU 5'
query=miR6147, target=R03G_17163, score=0, range=387-408, strand=
target 5' AGUGGGGUUUUGAUGCAUGUCA 3'
: : : : : : : : : : : : : : : : : :
query 3' UCACCCCAAACUACGUACAGU 5'
query=miR6147, target=R03G_15896, score=0, range=387-408, strand=
target 5' AGUGGGGUUUUGAUGCAUGUCA 3'
: : : : : : : : : : : : : : : : : :
query 3' UCACCCCAAACUACGUACAGU 5'
query=miR6147, target=R03G_14346, score=0, range=387-408, strand=
target 5' AGUGGGGUUUUGAUGCAUGUCA 3'
: : : : : : : : : : : : : : : : : :
query 3' UCACCCCAAACUACGUACAGU 5'
query=miR6147, target=R03G_02711, score=0, range=387-408, strand=
target 5' AGUGGGGUUUUGAUGCAUGUCA 3'
: : : : : : : : : : : : : : : : : :
query 3' UCACCCCAAACUACGUACAGU 5'
query=miR396b, target=R03G_03508, score=2, range=780-800, strand=
target 5' UGUUCAAGAAAGCUGUGGAA 3'
: : : : : : : : : : : : : : : : : :
query 3' UCAAG-UUCUUUCGACACCUU 5'
query=miR396b, target=R03G_02790, score=4, range=740-759, strand=
target 5' CGCUCAAGAAAGCUAUGGAA 3'
: : : : : : : : : : : : : : : : : :
query 3' UCAAGUUCUUUCGACACCUU 5'
query=miR396b, target=R03G_16340, score=4, range=605-624, strand=
target 5' AGUUGAUGGAAGCUGUGGAU 3'
: : : : : : : : : : : : : : : : : :
query 3' UCAAGUUCUUUCGACACCUU 5'
query=miR396b, target=R03G_07651, score=4, range=4206-4225, stran
target 5' AAUUAAGAAAGCUGUGAAA 3'
: : : : : : : : : : : : : : : : : :
query 3' UCAAGUUCUUUCGACACCUU 5'
query=miR396b, target=R03G_08307, score=4, range=804-822, strand=
target 5' AGUUGAAGAAAGCU-UGGAU 3'
: : : : : : : : : : : : : : : : : :
query 3' UCAAGUUCUUUCGACACCUU 5'
query=miR396b, target=R03G_06158, score=4, range=1190-1209, stran
target 5' UGCGCAUGAAAGCUGUGGAA 3'
: : : : : : : : : : : : : : : : : :
query 3' UCAAGUUCUUUCGACACCUU 5'
query=miR7711-5p.1, target=R03G_12954, score=2, range=54-75, stra
target 5' CAAGAAGUCAACAGCAAAGUA 3'
```

query 3' GUUCUUCAGUUUGUCGAUUCAU 5'  
query=miR7711-5p.1, target=R03G\_10762, score=2, range=54-75, str  
target 5' CAAGAAGUCAAACAGCAAAGUA 3'

query 3' GUUCUUCAGUUUGUCGAUUCAU 5'  
query=miR7711-5p.1, target=R03G\_10770, score=2, range=54-75, str  
target 5' CAAGAAGUCAAACAGCAAAGUA 3'

query 3' GUUCUUCAGUUUGUCGAUUCAU 5'  
query=miR7711-5p.1, target=R03G\_00304, score=2, range=54-75, str  
target 5' CAAGAAGUCAAACAGCAAAGUA 3'

query 3' GUUCUUCAGUUUGUCGAUUCAU 5'  
query=miR7711-5p.1, target=R03G\_04690, score=4, range=54-75, str  
target 5' CAAGAAGUCAAACAGCGAAAUA 3'

query 3' GUUCUUCAGUUUGUCGAUUCAU 5'  
query=miR7711-5p.1, target=R03G\_05431, score=4, range=54-75, str  
target 5' CAAGAAGUCAAACAGCAAAAUA 3'

query 3' GUUCUUCAGUUUGUCGAUUCAU 5'  
query=miR7711-5p.1, target=R03G\_02822, score=4, range=54-75, str  
target 5' CAAGAAGUCAAACAGCGAAAUA 3'

query 3' GUUCUUCAGUUUGUCGAUUCAU 5'  
query=miR7711-5p.1, target=R03G\_09168, score=4, range=54-75, str  
target 5' CAAGAAGUCAAACAGCAAAAUA 3'

query 3' GUUCUUCAGUUUGUCGAUUCAU 5'  
query=miR7711-5p.1, target=R03G\_15141, score=4, range=54-75, str  
target 5' CAAGAAGUCAAACAGCAAAAUA 3'

query 3' GUUCUUCAGUUUGUCGAUUCAU 5'  
query=miR7711-5p.1, target=R03G\_04787, score=4, range=54-75, str  
target 5' CAAGAAGUCAAACAGCAAAAUA 3'

query 3' UUGUAGUAGUCGUAUGUUCUCU 5'  
query=miR5373, target=R03G\_13221, score=0, range=1731-1752, stran  
target 5' AACAUCAUCAGCAUACAAGAGA 3'

query 3' UUGUAGUAGUCGUAUGUUCUCU 5'  
query=miR5373, target=R03G\_13224, score=0, range=1731-1752, stran  
target 5' AACAUCAUCAGCAUACAAGAGA 3'



query 3' UUGUAGUAGUCGUAUGUUCUCU 5'  
query=miR5373, target=R03G\_04123, score=0, range=1731-1752, stran  
target 5' AACAUCAUCAGCAUACAAGAGA 3'  
.....  
query 3' UUGUAGUAGUCGUAUGUUCUCU 5'  
query=miR5373, target=R03G\_04120, score=0, range=1731-1752, stran  
target 5' AACAUCAUCAGCAUACAAGAGA 3'  
.....  
query 3' UUGUAGUAGUCGUAUGUUCUCU 5'  
query=miR5373, target=R03G\_04203, score=0, range=675-696, strand=  
target 5' AACAUCAUCAGCAUACAAGAGA 3'  
.....  
query 3' UUGUAGUAGUCGUAUGUUCUCU 5'  
query=miR5373, target=R03G\_13218, score=0, range=144-165, strand=  
target 5' AACAUCAUCAGCAUACAAGAGA 3'  
.....  
query 3' UUGUAGUAGUCGUAUGUUCUCU 5'  
query=miR5373, target=R03G\_16122, score=0, range=144-165, strand=  
target 5' AACAUCAUCAGCAUACAAGAGA 3'  
.....  
query 3' UUGUAGUAGUCGUAUGUUCUCU 5'  
query=miR5373, target=R03G\_14836, score=1, range=1482-1503, stran  
target 5' AACGUCAUCAGCAUACAAGAGG 3'  
.....  
query 3' UUGUAGUAGUCGUAUGUUCUCU 5'  
query=miR5373, target=R03G\_06780, score=1, range=759-780, strand=  
target 5' CACAUCaucagCAUACAAGAGA 3'  
.....  
query 3' UUGUAGUAGUCGUAUGUUCUCU 5'  
query=miR5373, target=R03G\_00484, score=1.5, range=32-53, strand=  
target 5' AAUGUCAUCAGCAUACAAGAGG 3'  
.....  
query 3' UUGUAGUAGUCGUAUGUUCUCU 5'  
query=miR5373, target=R03G\_16800, score=2, range=3363-3384, stran  
target 5' CACAUCaucagCAUACAGGAGA 3'  
.....  
query 3' UUGUAGUAGUCGUAUGUUCUCU 5'  
query=miR5373, target=R03G\_15267, score=2, range=1125-1146, stran  
target 5' CACAUCaucagCAUACAGGAGA 3'  
.....  
query 3' UUGUAGUAGUCGUAUGUUCUCU 5'  
query=miR5373, target=R03G\_17246, score=2, range=564-585, strand=  
target 5' CACAUCaucagCAUACAGGAGA 3'  
.....  
query 3' UUGUAGUAGUCGUAUGUUCUCU 5'

query=miR5373, target=R03G\_16819, score=2, range=135-156, strand=  
target 5' CACAUCAUCAGCAUACAGGAGA 3'  
.....  
query 3' UUGUAGUAGUCGUAUGUUCUCU 5'  
query=miR5373, target=R03G\_12339, score=3.5, range=1656-1677,  
strand=-1  
target 5' GACUUCAUCAGCAUUCAAGAGA 3'  
.:: .....  
query 3' UUGUAGUAGUCGUAUGUUCUCU 5'  
query=miR5373, target=R03G\_14120, score=4, range=145-166, strand=  
target 5' UACAUCAUCGGCAUACAAAAGA 3'  
.....: :  
query 3' UUGUAGUAGUCGUAUGUUCUCU 5'  
query=miR5373, target=R03G\_15307, score=4, range=1483-1504, stran  
target 5' CACAUCAACAGCAUACAAGACA 3'  
.....: :  
query 3' UUGUAGUAGUCGUAUGUUCUCU 5'  
query=miR5373, target=R03G\_14105, score=4, range=162-183, strand=  
target 5' UACAUCAUCGGCAUACAAAAGA 3'  
.....: :  
query 3' UUGUAGUAGUCGUAUGUUCUCU 5'  
query=miR5373, target=R03G\_13384, score=4, range=1656-1677, stran  
target 5' GACUUCGUCAGCAUUCAAGAGA 3'  
.:: .....  
query 3' UUGUAGUAGUCGUAUGUUCUCU 5'  
query=miR832-3p, target=R03G\_15146, score=1.5, range=363-382, str  
target 5' CUGGGCUUGGAUUCGAUCAG 3'  
:: .....  
query 3' GAACCGAACCUAAGCUAGUU 5'  
query=miR832-3p, target=R03G\_12664, score=2.5, range=210-229, str  
target 5' CUGGGCUUGGAUUCGAUCGG 3'  
:: .....  
query 3' GAACCGAACCUAAGCUAGUU 5'  
query=miR832-3p, target=R03G\_07112, score=2.5, range=306-325, str  
target 5' CUGGGCUUGGAUUCGAUCGG 3'  
:: .....  
query 3' GAACCGAACCUAAGCUAGUU 5'  
query=miR832-3p, target=R03G\_08663, score=2.5, range=483-502, str  
target 5' CUGGGCUUGGAUUCGAUCGG 3'  
:: .....  
query 3' GAACCGAACCUAAGCUAGUU 5'  
query=miR832-3p, target=R03G\_07120, score=2.5, range=306-325, str  
target 5' CUGGGCUUGGAUUCGAUCGG 3'  
:: .....  
query 3' GAACCGAACCUAAGCUAGUU 5'

query=miR832-3p, target=R03G\_15001, score=2.5, range=306-325, str  
target 5' CUGGGCUUGGAUUCGAUCGG 3'  
:: ::::::::::::::::::::

query 3' GAACCGAACCUAAGCUAGUU 5'  
query=miR832-3p, target=R03G\_15575, score=2.5, range=306-325, str  
target 5' CUGGGCUUGGAUUCGAUCGG 3'  
:: ::::::::::::::::::::

query 3' GAACCGAACCUAAGCUAGUU 5'  
query=miR832-3p, target=R03G\_11240, score=2.5, range=306-325, str  
target 5' CUGGGCUUGGAUUCGAUCGG 3'  
:: ::::::::::::::::::::

query 3' GAACCGAACCUAAGCUAGUU 5'  
query=miR832-3p, target=R03G\_08794, score=3, range=138-158, stran  
target 5' CUUGCCUAUGGAUUUGAUCAA 3'  
:::: :: ::::::::::::::::::::

query 3' GAACCGA-ACCUAAGCUAGUU 5'  
query=miR832-3p, target=R03G\_12847, score=3, range=293-312, stran  
target 5' CCUCGAUUGGAUUCGAUCAA 3'  
: : : ::::::::::::::::::::

query 3' GAACCGAACCUAAGCUAGUU 5'  
query=miR832-3p, target=R03G\_16594, score=3, range=515-534, stran  
target 5' CUUGGAUUGGAUUCGAUUGA 3'  
::::: ::::::::::::::::::::

query 3' GAACCGAACCUAAGCUAGUU 5'  
query=miR832-3p, target=R03G\_03727, score=3.5, range=1611-1630,  
strand=1  
target 5' CUUGAUUUGGAUUCAAUCAA 3'  
:::: .:::::::::: ::::::

query 3' GAACCGAACCUAAGCUAGUU 5'  
query=miR832-3p, target=R03G\_13277, score=3.5, range=483-502, str  
target 5' CUGGGCUUGGAUUCGAUCCG 3'  
:: :::::::::::::::::::: .

query 3' GAACCGAACCUAAGCUAGUU 5'  
query=miR832-3p, target=R03G\_14621, score=3.5, range=141-160, str  
target 5' CUGGGCUUGGAUCCGAUCAG 3'  
:: :::::::::::::: ::::::.

query 3' GAACCGAACCUAAGCUAGUU 5'  
query=miR832-3p, target=R03G\_10800, score=3.5, range=141-160, str  
target 5' CUGGGCUUGGAUCCGAUCAG 3'  
:: :::::::::::::: ::::::.

query 3' GAACCGAACCUAAGCUAGUU 5'  
query=miR832-3p, target=R03G\_16545, score=3.5, range=483-502, str  
target 5' CUGGGCUUGGAUCCGAUCAG 3'  
:: :::::::::::::: ::::::.

query 3' GAACCGAACCUAAGCUAGUU 5'

query=miR832-3p, target=R03G\_07031, score=3.5, range=483-502, str  
target 5' CUGGGCUUGGAUUCGAUCCG 3'  
:: :::::::::::::::::::: .  
query 3' GAACCGAACCUAAGCUAGUU 5'  
query=miR832-3p, target=R03G\_00255, score=3.5, range=483-502, str  
target 5' CUGGGCUUGGAUCCGAUCAG 3'  
:: :::::::::::::::::::: .  
query 3' GAACCGAACCUAAGCUAGUU 5'  
query=miR832-3p, target=R03G\_16359, score=3.5, range=483-502, str  
target 5' CUGGGCUUGGAUCCGAUCAG 3'  
:: :::::::::::::::::::: .  
query 3' GAACCGAACCUAAGCUAGUU 5'  
query=miR832-3p, target=R03G\_09612, score=3.5, range=483-502, str  
target 5' CUGGGCUUGGAUCCGAUCAG 3'  
:: :::::::::::::::::::: .  
query 3' GAACCGAACCUAAGCUAGUU 5'  
query=miR832-3p, target=R03G\_16554, score=3.5, range=483-502, str  
target 5' CUGGGCUUGGAUUCGAUCCG 3'  
:: :::::::::::::::::::: .  
query 3' GAACCGAACCUAAGCUAGUU 5'  
query=miR832-3p, target=R03G\_13271, score=3.5, range=483-502, str  
target 5' CUGGGCUUGGAUCCGAUCAG 3'  
:: :::::::::::::::::::: .  
query 3' GAACCGAACCUAAGCUAGUU 5'  
query=miR832-3p, target=R03G\_03684, score=3.5, range=408-428, str  
target 5' CUUGGUUUUGGAUUGGAUCAA 3'  
::::: .::::::::::: :::::::  
query 3' GAACC-GAACCUAAGCUAGUU 5'  
query=miR832-3p, target=R03G\_03803, score=3.5, range=306-325, str  
target 5' CUGGACUUGGAUUCGAUCGG 3'  
:: : :::::::::::::::::::: .  
query 3' GAACCGAACCUAAGCUAGUU 5'  
query=miR832-3p, target=R03G\_04019, score=3.5, range=415-434, str  
target 5' UUUUCUUUGGAUUCGAUCAG 3'  
.::: .::::::::::: .  
query 3' GAACCGAACCUAAGCUAGUU 5'  
query=miR832-3p, target=R03G\_05301, score=4, range=435-454, stran  
target 5' UUUGGAUUGGAUUUGGUCAG 3'  
.::::: :::::::::::::::::::: .  
query 3' GAACCGAACCUAAGCUAGUU 5'  
query=miR832-3p, target=R03G\_11266, score=4, range=306-325, stran  
target 5' CUGGGCUUGGAUCCGGUCAA 3'  
:: :::::::::::::::::::: .  
query 3' GAACCGAACCUAAGCUAGUU 5'  
query=miR832-3p, target=R03G\_01902, score=4, range=3924-3944, str

target 5' CUAUGGCUUGGAUUUCAUCA 3'  
 :: ::::::::::::::. :::::  
 query 3' GA-ACCGAACCUAAGCUAGUU 5'  
 query=miR832-3p, target=R03G\_15416, score=4, range=343-363, stran  
 target 5' CCUGGCUUUGGAUUGGAUCA 3'  
 : :::: :::::::::: :::::  
 query 3' GAACCG-AACCUAAGCUAGUU 5'  
 query=miR832-3p, target=R03G\_03634, score=4, range=2610-2630, str  
 target 5' CUUGCCAAUGGAUUUGAUCAA 3'  
 :::: : :::::::::::::::  
 query 3' GAACCG-AACCUAAGCUAGUU 5'  
 query=miR832-3p, target=R03G\_10693, score=4, range=571-590, stran  
 target 5' CGUGUGAUGGAUUCGAUCA 3'  
 : :: :::::::::::::::  
 query 3' GAACCGAACCUAAGCUAGUU 5'  
 query=miR832-3p, target=R03G\_01659, score=4, range=1171-1189, str  
 target 5' CUUGGC-UCGAUUCGAUUAA 3'  
 :::::: : :::::::::::::::  
 query 3' GAACCGAACCUAAGCUAGUU 5'  
 query=miR832-3p, target=R03G\_12122, score=4, range=263-282, stran  
 target 5' CUUGCCUUGGAUUUCAUCA 3'  
 :::: ::::::::::. :::::  
 query 3' GAACCGAACCUAAGCUAGUU 5'  
 query=miR832-3p, target=R03G\_03345, score=4, range=263-282, stran  
 target 5' CUUGCCUUGGAUUUCAUCA 3'  
 :::: ::::::::::. :::::  
 query 3' GAACCGAACCUAAGCUAGUU 5'  
 query=miR832-3p, target=R03G\_15816, score=4, range=710-729, stran  
 target 5' GAUGGCCUGGAUUUGAUCAA 3'  
 :::: :::::::::::::::  
 query 3' GAACCGAACCUAAGCUAGUU 5'  
 query=miR172k, target=R03G\_17256, score=0, range=356-374, strand=  
 target 5' AGCAGCAGCAUCCAGUUCA 3'  
 :::::::::::::::::::::  
 query 3' UCGUCGUCGUAGGUCAAGU 5'  
 query=miR172k, target=R03G\_15890, score=0, range=359-377, strand=  
 target 5' AGCAGCAGCAUCCAGUUCA 3'  
 :::::::::::::::::::::  
 query 3' UCGUCGUCGUAGGUCAAGU 5'  
 query=miR172k, target=R03G\_15147, score=0, range=323-341, strand=  
 target 5' AGCAGCAGCAUCCAGUUCA 3'  
 :::::::::::::::::::::  
 query 3' UCGUCGUCGUAGGUCAAGU 5'  
 query=miR172k, target=R03G\_13146, score=0, range=359-377, strand=  
 target 5' AGCAGCAGCAUCCAGUUCA 3'

query 3' UCGUCGUCGUAGGUCAAGU 5'  
query=miR172k, target=R03G\_09182, score=0, range=335-353, strand=  
target 5' AGCAGCAGCAUCCAGUUCA 3'  
query 3' UCGUCGUCGUAGGUCAAGU 5'  
query=miR172k, target=R03G\_10041, score=0, range=359-377, strand=  
target 5' AGCAGCAGCAUCCAGUUCA 3'  
query 3' UCGUCGUCGUAGGUCAAGU 5'  
query=miR172k, target=R03G\_00288, score=0, range=350-368, strand=  
target 5' AGCAGCAGCAUCCAGUUCA 3'  
query 3' UCGUCGUCGUAGGUCAAGU 5'  
query=miR172k, target=R03G\_17248, score=0, range=359-377, strand=  
target 5' AGCAGCAGCAUCCAGUUCA 3'  
query 3' UCGUCGUCGUAGGUCAAGU 5'  
query=miR172k, target=R03G\_17350, score=0, range=353-371, strand=  
target 5' AGCAGCAGCAUCCAGUUCA 3'  
query 3' UCGUCGUCGUAGGUCAAGU 5'  
query=miR172k, target=R03G\_16137, score=0, range=353-371, strand=  
target 5' AGCAGCAGCAUCCAGUUCA 3'  
query 3' UCGUCGUCGUAGGUCAAGU 5'  
query=miR172k, target=R03G\_03584, score=0, range=287-305, strand=  
target 5' AGCAGCAGCAUCCAGUUCA 3'  
query 3' UCGUCGUCGUAGGUCAAGU 5'  
query=miR172k, target=R03G\_05425, score=1, range=356-374, strand=  
target 5' AGCAGAAGCAUCCAGUUCA 3'  
query 3' UCGUCGUCGUAGGUCAAGU 5'  
query=miR172k, target=R03G\_09497, score=1, range=68-86, strand=1  
target 5' AACAGCAGCAUCCAGUUCA 3'  
query 3' UCGUCGUCGUAGGUCAAGU 5'  
query=miR172k, target=R03G\_09603, score=2, range=371-389, strand=  
target 5' AGCAGCAGCACCCAGUUCA 3'  
query 3' UCGUCGUCGUAGGUCAAGU 5'  
query=miR172k, target=R03G\_10218, score=2, range=350-368, strand=  
target 5' AGCAGCAGCACCCAGUUCA 3'

```
query 3' UCGUCGUCGUAGGUCAAGU 5'  
query=miR172k, target=R03G_11537, score=2, range=371-389, strand=  
target 5' AGCAGCAGCACCCAGUUCA 3'  
:::::::::: ::::::::::  
query 3' UCGUCGUCGUAGGUCAAGU 5'  
query=miR172k, target=R03G_11236, score=2, range=371-389, strand=  
target 5' AGCAGCAGCACCCAGUUCA 3'  
:::::::::: ::::::::::  
query 3' UCGUCGUCGUAGGUCAAGU 5'  
query=miR172k, target=R03G_07738, score=2, range=380-398, strand=  
target 5' AGCAGCAGCACCCAGUUCA 3'  
:::::::::: ::::::::::  
query 3' UCGUCGUCGUAGGUCAAGU 5'  
query=miR172k, target=R03G_02228, score=2, range=329-347, strand=  
target 5' AGCAGCAGCACCCAGUUCA 3'  
:::::::::: ::::::::::  
query 3' UCGUCGUCGUAGGUCAAGU 5'  
query=miR172k, target=R03G_07981, score=2, range=329-347, strand=  
target 5' AGCAGCAGCACCCAGUUCA 3'  
:::::::::: ::::::::::  
query 3' UCGUCGUCGUAGGUCAAGU 5'  
query=miR172k, target=R03G_07720, score=2, range=329-347, strand=  
target 5' AGCAGCAGCACCCAGUUCA 3'  
:::::::::: ::::::::::  
query 3' UCGUCGUCGUAGGUCAAGU 5'  
query=miR172k, target=R03G_15897, score=2, range=329-347, strand=  
target 5' AGCAGCAGCACCCAGUUCA 3'  
:::::::::: ::::::::::  
query 3' UCGUCGUCGUAGGUCAAGU 5'  
query=miR172k, target=R03G_09602, score=2, range=329-347, strand=  
target 5' AGCAGCAGCACCCAGUUCA 3'  
:::::::::: ::::::::::  
query 3' UCGUCGUCGUAGGUCAAGU 5'  
query=miR172k, target=R03G_04211, score=2, range=329-347, strand=  
target 5' AGCAGCAGCACCCAGUUCA 3'  
:::::::::: ::::::::::  
query 3' UCGUCGUCGUAGGUCAAGU 5'  
query=miR172k, target=R03G_07696, score=2, range=329-347, strand=  
target 5' AGCAGCAGCACCCAGUUCA 3'  
:::::::::: ::::::::::  
query 3' UCGUCGUCGUAGGUCAAGU 5'  
query=miR172k, target=R03G_07306, score=2, range=329-347, strand=  
target 5' AGCAGCAGCACCCAGUUCA 3'  
:::::::::: ::::::::::  
query 3' UCGUCGUCGUAGGUCAAGU 5'
```





target 5' AGCAGCAGCAUCUCGUUCG 3'  
 ::::::::::::::. ::::.

query 3' UCGUCGUCGUAGGUCAAGU 5'  
 query=miR172k, target=R03G\_08846, score=3.5, range=185-203, stran

target 5' AGCAGCAGCAUCUCGUUCG 3'  
 ::::::::::::::. ::::.

query 3' UCGUCGUCGUAGGUCAAGU 5'  
 query=miR172k, target=R03G\_09483, score=3.5, range=185-203, stran

target 5' AGCAGCAGCAUCUCGUUCG 3'  
 ::::::::::::::. ::::.

query 3' UCGUCGUCGUAGGUCAAGU 5'  
 query=miR172k, target=R03G\_11773, score=3.5, range=185-203, stran

target 5' AGCAGCAGCAUCUCGUUCG 3'  
 ::::::::::::::. ::::.

query 3' UCGUCGUCGUAGGUCAAGU 5'  
 query=miR172k, target=R03G\_07704, score=3.5, range=185-203, stran

target 5' AGCAGCAGCAUCUCGUUCG 3'  
 ::::::::::::::. ::::.

query 3' UCGUCGUCGUAGGUCAAGU 5'  
 query=miR172k, target=R03G\_13726, score=3.5, range=185-203, stran

target 5' AGCAGCAGCAUCUCGUUCG 3'  
 ::::::::::::::. ::::.

query 3' UCGUCGUCGUAGGUCAAGU 5'  
 query=miR172k, target=R03G\_03615, score=3.5, range=185-203, stran

target 5' AGCAGCAGCAUCUCGUUCG 3'  
 ::::::::::::::. ::::.

query 3' UCGUCGUCGUAGGUCAAGU 5'  
 query=miR172k, target=R03G\_09607, score=3.5, range=185-203, stran

target 5' AGCAGCAGCAUCUCGUUCG 3'  
 ::::::::::::::. ::::.

query 3' UCGUCGUCGUAGGUCAAGU 5'  
 query=miR172k, target=R03G\_13742, score=3.5, range=185-203, stran

target 5' AGCAGCAGCAUCUCGUUCG 3'  
 ::::::::::::::. ::::.

query 3' UCGUCGUCGUAGGUCAAGU 5'  
 query=miR172k, target=R03G\_17440, score=3.5, range=1027-1045, str

target 5' AAUAGCAGCAUCCAGUUUC 3'  
 : ::::::::::::::.

query 3' UCGUCGUCGUAGGUCAAGU 5'  
 query=miR172k, target=R03G\_13150, score=3.5, range=748-766, stran

target 5' AAUAGCAGCAUCCAGUUUC 3'  
 : ::::::::::::::.

query 3' UCGUCGUCGUAGGUCAAGU 5'  
 query=miR172k, target=R03G\_01737, score=3.5, range=541-559, stran

target 5' AAUAGCAGCAUCCAGUUUC 3'



query=miR172k, target=R03G\_01016, score=4, range=15-33, strand=1  
target 5' AACAGGAGCAUCCGGUUUA 3'  
: ::: :  
query 3' UCGUCGUCGUAGGUCAAGU 5'  
query=miR172k, target=R03G\_06536, score=4, range=431-448, strand=  
target 5' AGCAGCAGCAGCCA-UUCA 3'  
: : : : :  
query 3' UCGUCGUCGUAGGUCAAGU 5'  
query=miR172k, target=R03G\_03482, score=4, range=101-118, strand=  
target 5' AGCAGCAGCAACCA-UUCA 3'  
: : : : :  
query 3' UCGUCGUCGUAGGUCAAGU 5'  
query=miR172k, target=R03G\_05735, score=4, range=1565-1582, stran  
target 5' AGGAG-AGCAUUCAGUUUA 3'  
: : : : :  
query 3' UCGUCGUCGUAGGUCAAGU 5'  
query=miR172k, target=R03G\_09470, score=4, range=1278-1296, stran  
target 5' AGCAGCAGCAUCCGCUUCU 3'  
: : : : :  
query 3' UCGUCGUCGUAGGUCAAGU 5'  
query=miR172k, target=R03G\_01272, score=4, range=4977-4995, stran  
target 5' AGCAGCAGCAUCCUUUUA 3'  
: : : : :  
query 3' UCGUCGUCGUAGGUCAAGU 5'  
query=miR172k, target=R03G\_11148, score=4, range=234-252, strand=  
target 5' AGCAGCAGCAUCCUGUACA 3'  
: : : : :  
query 3' UCGUCGUCGUAGGUCAAGU 5'  
query=miR172k, target=R03G\_16173, score=4, range=147-166, strand=  
target 5' AGUCAGCAGCAUUCAGUACA 3'  
: : : : :  
query 3' UC-GUCGUCGUAGGUCAAGU 5'  
query=miR172k, target=R03G\_06092, score=4, range=3708-3726, stran  
target 5' GGCAACAGCAUCCAUUUCG 3'  
. : : : :  
query 3' UCGUCGUCGUAGGUCAAGU 5'  
query=miR172k, target=R03G\_12555, score=4, range=1934-1953, stran  
target 5' AGUACGUUGCAUCCAGUUA 3'  
: : : : :  
query 3' UCGU-CGUCGUAGGUCAAGU 5'  
query=miR172k, target=R03G\_09685, score=4, range=630-648, strand=  
target 5' ACCGAUAGCAUUCAGUUA 3'  
: : : : :  
query 3' UCGUCGUCGUAGGUCAAGU 5'  
query=miR172k, target=R03G\_06770, score=4, range=102-119, strand=

target 5' UGCAG-AGCAUCUGGUUCA 3'  
:::: ::::::::::::::  
query 3' UCGUCGUCGUAGGUCAAGU 5'  
query=miR172k, target=R03G\_03308, score=4, range=9-27, strand=-1  
target 5' AUCAGAAGCAUUCAGUUC 3'  
: ::: ::::::::::::::  
query 3' UCGUCGUCGUAGGUCAAGU 5'  
query=miR172k, target=R03G\_06887, score=4, range=768-785, strand=  
target 5' AG-AGCAGUAUCCAAUUCA 3'  
:: :::::::::::::: ::::  
query 3' UCGUCGUCGUAGGUCAAGU 5'  
query=miR172k, target=R03G\_16320, score=4, range=441-459, strand=  
target 5' AUUUGUAGCAUCCAGUUCU 3'  
: . ::::::::::::::  
query 3' UCGUCGUCGUAGGUCAAGU 5'  
query=miR7837, target=R03G\_11243, score=0, range=158-178, strand=  
target 5' CAGCUACCACUCCUACACCCA 3'  
::::::::::::::::::  
query 3' GUCGAUGGUGAGGAUGUGGGU 5'  
query=miR7837, target=R03G\_00539, score=3, range=299-319, strand=  
target 5' CAGCUCCACUCCUUCACCCA 3'  
::::: :::::::::: ::::::  
query 3' GUCGAUGGUGAGGAUGUGGGU 5'  
query=miR7837, target=R03G\_01660, score=4, range=834-853, strand=  
target 5' UA-CUACCACUCCUGCACCU 3'  
.:: ::::::::::::::  
query 3' GUCGAUGGUGAGGAUGUGGGU 5'  
query=miR7837, target=R03G\_14336, score=4, range=1193-1213, stran  
target 5' CAGUAUCUACUCCUACAUCCA 3'  
:::. ::::::::::::::  
query 3' GUCGAUGGUGAGGAUGUGGGU 5'  
query=miR8016, target=R03G\_13451, score=1, range=1741-1762, stran  
target 5' CCACAAGCCCUUCAUUCAAAA 3'  
::::: ::::::::::::::  
query 3' GGUGUCCGGGAAGUAAGUUUUU 5'  
query=miR8016, target=R03G\_01193, score=1, range=1495-1516, stran  
target 5' CCACAAGCCCUUCAUUCAAAA 3'  
::::: ::::::::::::::  
query 3' GGUGUCCGGGAAGUAAGUUUUU 5'  
query=miR8016, target=R03G\_05342, score=2, range=1906-1927, stran  
target 5' CCACAAGCCCUUCAUUCAGAAA 3'  
::::: ::::::::::::::  
query 3' GGUGUCCGGGAAGUAAGUUUUU 5'  
query=miR8016, target=R03G\_14552, score=2, range=1906-1927, stran  
target 5' CCACAAGCCCUUCAUUCAGAAA 3'

::::: ::::::::::::::::::::  
query 3' GGUGUCCGGGAAGUAAGUUUUU 5'  
query=miR8016, target=R03G\_16368, score=2, range=1906-1927, stran  
target 5' CCACAAGCCCUUCAUUCAGAAA 3'  
::::: ::::::::::::::::::::  
query 3' GGUGUCCGGGAAGUAAGUUUUU 5'  
query=miR8016, target=R03G\_11542, score=2, range=1741-1762, stran  
target 5' CCACAAGCCCUUCAUUCAGAAA 3'  
::::: ::::::::::::::::::::  
query 3' GGUGUCCGGGAAGUAAGUUUUU 5'  
query=miR8016, target=R03G\_13708, score=2, range=1741-1762, stran  
target 5' CCACAAGCCCUUCAUUCAGAAA 3'  
::::: ::::::::::::::::::::  
query 3' GGUGUCCGGGAAGUAAGUUUUU 5'  
query=miR8016, target=R03G\_12646, score=2, range=1741-1762, stran  
target 5' CCACAAGCCCUUCAUUCAGAAA 3'  
::::: ::::::::::::::::::::  
query 3' GGUGUCCGGGAAGUAAGUUUUU 5'  
query=miR8016, target=R03G\_15886, score=2, range=1741-1762, stran  
target 5' CCACAAGCCCUUCAUUCAGAAA 3'  
::::: ::::::::::::::::::::  
query 3' GGUGUCCGGGAAGUAAGUUUUU 5'  
query=miR8016, target=R03G\_05908, score=2, range=1741-1762, stran  
target 5' CCACAAGCCCUUCAUUCAGAAA 3'  
::::: ::::::::::::::::::::  
query 3' GGUGUCCGGGAAGUAAGUUUUU 5'  
query=miR8016, target=R03G\_01324, score=2, range=592-613, strand=  
target 5' CCACAAGCCCUUCAUUCAGAAA 3'  
::::: ::::::::::::::::::::  
query 3' GGUGUCCGGGAAGUAAGUUUUU 5'  
query=miR8016, target=R03G\_02818, score=2.5, range=241-262, stran  
target 5' CCGCAAGCCCUUCAUUCAGAAA 3'  
::::: ::::::::::::::::::::  
query 3' GGUGUCCGGGAAGUAAGUUUUU 5'  
query=miR8016, target=R03G\_12968, score=3, range=1822-1843, stran  
target 5' CCACAAGCCCUUCCUUCAAAAA 3'  
::::: ::::::::::::::::::::  
query 3' GGUGUCCGGGAAGUAAGUUUUU 5'  
query=miR8016, target=R03G\_05954, score=3, range=1822-1843, stran  
target 5' CCACAAGCCCUUCCUUCAAAAA 3'  
::::: ::::::::::::::::::::  
query 3' GGUGUCCGGGAAGUAAGUUUUU 5'  
query=miR8016, target=R03G\_05911, score=3, range=1675-1696, stran  
target 5' CCACAAGCCCUUCCUUCAAAAA 3'  
::::: ::::::::::::::::::::

query 3' GGUGUCCGGGAAGUAAGUUUUU 5'  
query=miR8016, target=R03G\_05427, score=3, range=1102-1123, stran  
target 5' CCACAAGCCCUUCCUUCAAAAA 3'  
.....  
query 3' GGUGUCCGGGAAGUAAGUUUUU 5'  
query=miR8016, target=R03G\_15258, score=3, range=592-613, strand=  
target 5' CCACAAGCCCUUCCUUCAAAAA 3'  
.....  
query 3' GGUGUCCGGGAAGUAAGUUUUU 5'  
query=miR8016, target=R03G\_05785, score=3.5, range=166-188, stran  
target 5' UCACAGGCGCUUUUUAUUCAAAAA 3'  
.....  
query 3' GGUGUCCG-GGAAGUAAGUUUUU 5'  
query=miR1515, target=R03G\_17349, score=0.5, range=15-36, strand=  
target 5' GGUCAUUGUCAUGC UAAAAUA 3'  
.....  
query 3' CCUAGUAACAGUACGAUUUUUAU 5'  
query=miR1515, target=R03G\_16894, score=0.5, range=15-36, strand=  
target 5' GGUCAUUGUCAUGC UAAAAUA 3'  
.....  
query 3' CCUAGUAACAGUACGAUUUUUAU 5'  
query=miR1515, target=R03G\_13852, score=1, range=461-482, strand=  
target 5' GGAUCAUUGUCAUGCUGAAAUA 3'  
.....  
query 3' CCUAGUAACAGUACGAUUUUUAU 5'  
query=miR1515, target=R03G\_15271, score=2, range=710-731, strand=  
target 5' GGAUCAUUGUCGUGCUGAAAUA 3'  
.....  
query 3' CCUAGUAACAGUACGAUUUUUAU 5'  
query=miR1515, target=R03G\_10771, score=2, range=461-482, strand=  
target 5' GGAUCAUUGUCAUGUUGAAAUA 3'  
.....  
query 3' CCUAGUAACAGUACGAUUUUUAU 5'  
query=miR1515, target=R03G\_16725, score=2, range=452-473, strand=  
target 5' GGAUCAUUGUCGUGCUGAAAUA 3'  
.....  
query 3' CCUAGUAACAGUACGAUUUUUAU 5'  
query=miR1515, target=R03G\_07739, score=2, range=461-482, strand=  
target 5' GGAUCAUUCUCAUGCUGAAAUA 3'  
.....  
query 3' CCUAGUAACAGUACGAUUUUUAU 5'  
query=miR1515, target=R03G\_13731, score=2.5, range=203-225, stran  
target 5' GGUCAUUGUCAUGC UAAAAGUA 3'  
.....  
query 3' CCUAGUAACAGUACGAUUUU-AU 5'







:::::::::: ::::::::::::::  
query 3' CCUAGUAACAGUACGAUUUUUAU 5'  
query=miR1515, target=R03G\_01328, score=3, range=710-731, strand=  
target 5' GGAUCAUUAUCGUGCUGAAAUA 3'  
:::::::::: ::::::::::::::  
query 3' CCUAGUAACAGUACGAUUUUUAU 5'  
query=miR1515, target=R03G\_07137, score=3, range=710-731, strand=  
target 5' GGAUCAUUAUCGUGCUGAAAUA 3'  
:::::::::: ::::::::::::::  
query 3' CCUAGUAACAGUACGAUUUUUAU 5'  
query=miR1515, target=R03G\_05268, score=3, range=710-731, strand=  
target 5' GGAUCAUUAUCGUGCUGAAAUA 3'  
:::::::::: ::::::::::::::  
query 3' CCUAGUAACAGUACGAUUUUUAU 5'  
query=miR1515, target=R03G\_16911, score=3, range=305-326, strand=  
target 5' GGAUCAUUGUCAUGCUGAAAAA 3'  
:::::::::: ::::::::::::::  
query 3' CCUAGUAACAGUACGAUUUUUAU 5'  
query=miR1515, target=R03G\_12663, score=3, range=545-566, strand=  
target 5' GGAUCAUUAUCGUGCUGAAAUA 3'  
:::::::::: ::::::::::::::  
query 3' CCUAGUAACAGUACGAUUUUUAU 5'  
query=miR1515, target=R03G\_17355, score=3, range=545-566, strand=  
target 5' GGAUCAUUAUCGUGCUGAAAUA 3'  
:::::::::: ::::::::::::::  
query 3' CCUAGUAACAGUACGAUUUUUAU 5'  
query=miR1515, target=R03G\_04674, score=3, range=461-482, strand=  
target 5' GGAUCAUUAUCGUGCUGAAAUA 3'  
:::::::::: ::::::::::::::  
query 3' CCUAGUAACAGUACGAUUUUUAU 5'  
query=miR1515, target=R03G\_01962, score=3, range=461-482, strand=  
target 5' GGAUCAUUAUCGUGCUGAAAUA 3'  
:::::::::: ::::::::::::::  
query 3' CCUAGUAACAGUACGAUUUUUAU 5'  
query=miR1515, target=R03G\_16706, score=3, range=434-455, strand=  
target 5' GGAUCAUUAUCGUGCUGAAAUA 3'  
:::::::::: ::::::::::::::  
query 3' CCUAGUAACAGUACGAUUUUUAU 5'  
query=miR1515, target=R03G\_17223, score=3, range=434-455, strand=  
target 5' GGAUCAUUAUCGUGCUGAAAUA 3'  
:::::::::: ::::::::::::::  
query 3' CCUAGUAACAGUACGAUUUUUAU 5'  
query=miR1515, target=R03G\_09193, score=3, range=434-455, strand=  
target 5' GGAUCAUUAUCGUGCUGAAAUA 3'  
:::::::::: ::::::::::::::







query 3' CCUAGUAACAGUACGAUUUUUAU 5'  
query=miR1515, target=R03G\_10780, score=4, range=710-731, strand=  
target 5' GGGUCGUUGUCAUGCUGAAAAA 3'

query 3' CCUAGUAACAGUACGAUUUUUAU 5'  
query=miR1515, target=R03G\_00256, score=4, range=710-731, strand=  
target 5' GGGUCGUUGUCAUGCUGAAAAA 3'

query 3' CCUAGUAACAGUACGAUUUUUAU 5'  
query=miR1515, target=R03G\_14361, score=4, range=710-731, strand=  
target 5' GGGUCGUUGUCAUGCUGAAAAA 3'

query 3' CCUAGUAACAGUACGAUUUUUAU 5'  
query=miR1515, target=R03G\_05267, score=4, range=710-731, strand=  
target 5' GGGUCGUUGUCAUGCUGAAAAA 3'

query 3' CCUAGUAACAGUACGAUUUUUAU 5'  
query=miR1515, target=R03G\_09967, score=4, range=710-731, strand=  
target 5' GGGUCGUUGUCAUGCUGAAAAA 3'

query 3' CCUAGUAACAGUACGAUUUUUAU 5'  
query=miR1515, target=R03G\_04207, score=4, range=710-731, strand=  
target 5' GGGUCGUUGUCAUGCUGAAAAA 3'

query 3' CCUAGUAACAGUACGAUUUUUAU 5'  
query=miR1515, target=R03G\_04210, score=4, range=710-731, strand=  
target 5' GGGUCGUUGUCAUGCUGAAAAA 3'

query 3' CCUAGUAACAGUACGAUUUUUAU 5'  
query=miR1515, target=R03G\_07860, score=4, range=710-731, strand=  
target 5' GGGUCGUUGUCAUGCUGAAAAA 3'

query 3' CCUAGUAACAGUACGAUUUUUAU 5'  
query=miR1515, target=R03G\_09542, score=4, range=710-731, strand=  
target 5' GGGUCGUUGUCAUGCUGAAAAA 3'

query 3' CCUAGUAACAGUACGAUUUUUAU 5'  
query=miR1515, target=R03G\_10773, score=4, range=710-731, strand=  
target 5' GGGUCGUUGUCAUGCUGAAAAA 3'

query 3' CCUAGUAACAGUACGAUUUUUAU 5'  
query=miR1515, target=R03G\_04127, score=4, range=671-692, strand=  
target 5' GGAUCAUUGUCAUGCUGGAAGA 3'

query 3' CCUAGUAACAGUACGAUUUUUUAU 5'  
query=miR1515, target=R03G\_00244, score=4, range=671-692, strand=  
target 5' GGAUCAUUGUCAUGCUGGAAGA 3'  
..... :  
query 3' CCUAGUAACAGUACGAUUUUUUAU 5'  
query=miR1515, target=R03G\_05959, score=4, range=710-731, strand=  
target 5' GGGUCGUUGUCAUGCUGAAAAA 3'  
..... :  
query 3' CCUAGUAACAGUACGAUUUUUUAU 5'  
query=miR1515, target=R03G\_13147, score=4, range=497-518, strand=  
target 5' GGAUCAUUGUCAUGCUGGAAGA 3'  
..... :  
query 3' CCUAGUAACAGUACGAUUUUUUAU 5'  
query=miR1515, target=R03G\_09194, score=4, range=710-731, strand=  
target 5' GGGUCGUUGUCAUGCUGAAAAA 3'  
..... :  
query 3' CCUAGUAACAGUACGAUUUUUUAU 5'  
query=miR1515, target=R03G\_11966, score=4, range=710-731, strand=  
target 5' GGGUCGUUGUCAUGCUGAAAAA 3'  
..... :  
query 3' CCUAGUAACAGUACGAUUUUUUAU 5'  
query=miR1515, target=R03G\_07124, score=4, range=710-731, strand=  
target 5' GGGUCGUUGUCAUGCUGAAAAA 3'  
..... :  
query 3' CCUAGUAACAGUACGAUUUUUUAU 5'  
query=miR1515, target=R03G\_04205, score=4, range=419-440, strand=  
target 5' GGAUCAUUGUCAUGCUGGAAGA 3'  
..... :  
query 3' CCUAGUAACAGUACGAUUUUUUAU 5'  
query=miR1515, target=R03G\_09945, score=4, range=434-455, strand=  
target 5' GGGUCGUUGUCAUGCUGAAAAA 3'  
..... :  
query 3' CCUAGUAACAGUACGAUUUUUUAU 5'  
query=miR1515, target=R03G\_00287, score=4, range=599-620, strand=  
target 5' GGAUUGUUAUCAUGUUGAAAUA 3'  
..... :  
query 3' CCUAGUAACAGUACGAUUUUUUAU 5'  
query=miR1515, target=R03G\_16378, score=4, range=188-209, strand=  
target 5' GGAUCAUUGUCAUGUUGAAAAA 3'  
..... :  
query 3' CCUAGUAACAGUACGAUUUUUUAU 5'  
query=miR1515, target=R03G\_12649, score=4, range=98-119, strand=  
target 5' GGAUCAUUGUCAUGCUGGAAGA 3'  
..... :  
query 3' CCUAGUAACAGUACGAUUUUUUAU 5'



```
target 5' GGAUUGUUAUCAUGUUGAAAUA 3'
:::
query 3' CCUAGUAACAGUACGAUUUUUAU 5'
query=miR1515, target=R03G_07681, score=4, range=59-80, strand=-1
target 5' GGAUUGUUAUCAUGUUGAAAUA 3'
:::
query 3' CCUAGUAACAGUACGAUUUUUAU 5'
query=miR1515, target=R03G_06723, score=4, range=59-80, strand=-1
target 5' GGAUUGUUAUCAUGUUGAAAUA 3'
:::
query 3' CCUAGUAACAGUACGAUUUUUAU 5'
query=miR1515, target=R03G_02720, score=4, range=59-80, strand=-1
target 5' GGAUUGUUAUCAUGUUGAAAUA 3'
:::
query 3' CCUAGUAACAGUACGAUUUUUAU 5'
query=miR1515, target=R03G_12676, score=4, range=20-41, strand=-1
target 5' GGAUUGUUAUCAUGUUGAAAUA 3'
:::
query 3' CCUAGUAACAGUACGAUUUUUAU 5'
query=miR1515, target=R03G_03112, score=4, range=709-731, strand=
target 5' GGAUCAUUUAUCAUGCUGAAAGUA 3'
:::
query 3' CCUAGUAACAGUACGA-UUUUUUAU 5'
query=miR1515, target=R03G_05522, score=4, range=709-731, strand=
target 5' GGAUCAUUUAUCAUGCUGAAAGUA 3'
:::
query 3' CCUAGUAACAGUACGA-UUUUUUAU 5'
query=miR1515, target=R03G_00240, score=4, range=652-674, strand=
target 5' GGAUCAUUUAUCAUGCUGAAAGUA 3'
:::
query 3' CCUAGUAACAGUACGA-UUUUUUAU 5'
query=miR1515, target=R03G_02227, score=4, range=709-731, strand=
target 5' GGAUCAUUUAUCAUGCUGAAAGUA 3'
:::
query 3' CCUAGUAACAGUACGA-UUUUUUAU 5'
query=miR1515, target=R03G_10797, score=4, range=343-365, strand=
target 5' GGAUCAUUUAUCAUGCUGAAAGUA 3'
:::
query 3' CCUAGUAACAGUACGA-UUUUUUAU 5'
query=miR1515, target=R03G_17423, score=4, range=343-365, strand=
target 5' GGAUCAUUUAUCAUGCUGAAAGUA 3'
:::
query 3' CCUAGUAACAGUACGA-UUUUUUAU 5'
query=miR1515, target=R03G_14784, score=4, range=343-365, strand=
target 5' GGAUCAUUUAUCAUGCUGAAAGUA 3'
```



:::::::::: :::::::::: :::::::  
query 3' CCUAGUAACAGUACGA-UUUUUAU 5'  
query=miR1515, target=R03G\_16737, score=4, range=343-365, strand=  
target 5' GGAUCAUUAUCAUGCUGAAAGUA 3'  
:::::::::: :::::::::: :::::::  
query 3' CCUAGUAACAGUACGA-UUUUUAU 5'  
query=miR1515, target=R03G\_01725, score=4, range=343-365, strand=  
target 5' GGAUCAUUAUCAUGCUGAAAGUA 3'  
:::::::::: :::::::::: :::::::  
query 3' CCUAGUAACAGUACGA-UUUUUAU 5'  
query=miR1515, target=R03G\_07723, score=4, range=343-365, strand=  
target 5' GGAUCAUUAUCAUGCUGAAAGUA 3'  
:::::::::: :::::::::: :::::::  
query 3' CCUAGUAACAGUACGA-UUUUUAU 5'  
query=miR1515, target=R03G\_17092, score=4, range=343-365, strand=  
target 5' GGAUCAUUAUCAUGCUGAAAGUA 3'  
:::::::::: :::::::::: :::::::  
query 3' CCUAGUAACAGUACGA-UUUUUAU 5'  
query=miR1515, target=R03G\_10050, score=4, range=343-365, strand=  
target 5' GGAUCAUUAUCAUGCUGAAAGUA 3'  
:::::::::: :::::::::: :::::::  
query 3' CCUAGUAACAGUACGA-UUUUUAU 5'  
query=miR1515, target=R03G\_14981, score=4, range=343-365, strand=  
target 5' GGAUCAUUAUCAUGCUGAAAGUA 3'  
:::::::::: :::::::::: :::::::  
query 3' CCUAGUAACAGUACGA-UUUUUAU 5'  
query=miR1515, target=R03G\_12950, score=4, range=343-365, strand=  
target 5' GGAUCAUUAUCAUGCUGAAAGUA 3'  
:::::::::: :::::::::: :::::::  
query 3' CCUAGUAACAGUACGA-UUUUUAU 5'  
query=miR1515, target=R03G\_15145, score=4, range=343-365, strand=  
target 5' GGAUCAUUAUCAUGCUGAAAGUA 3'  
:::::::::: :::::::::: :::::::  
query 3' CCUAGUAACAGUACGA-UUUUUAU 5'  
query=miR1515, target=R03G\_03791, score=4, range=343-365, strand=  
target 5' GGAUCAUUAUCAUGCUGAAAGUA 3'  
:::::::::: :::::::::: :::::::  
query 3' CCUAGUAACAGUACGA-UUUUUAU 5'  
query=miR1515, target=R03G\_09926, score=4, range=343-365, strand=  
target 5' GGAUCAUUAUCAUGCUGAAAGUA 3'  
:::::::::: :::::::::: :::::::  
query 3' CCUAGUAACAGUACGA-UUUUUAU 5'  
query=miR1515, target=R03G\_11536, score=4, range=343-365, strand=  
target 5' GGAUCAUUAUCAUGCUGAAAGUA 3'  
:::::::::: :::::::::: :::::::

```

query 3' CCUAGUAACAGUACGA-UUUUUAU 5'
query=miR1515, target=R03G_05516, score=4, range=343-365, strand=
target 5' GGAUCAUUAUCAUGCUGAAAGUA 3'
:::::::::: :::::::::: :::::::
query 3' CCUAGUAACAGUACGA-UUUUUAU 5'
query=miR1515, target=R03G_17328, score=4, range=343-365, strand=
target 5' GGAUCAUUAUCAUGCUGAAAGUA 3'
:::::::::: :::::::::: :::::::
query 3' CCUAGUAACAGUACGA-UUUUUAU 5'
query=miR1515, target=R03G_15170, score=4, range=343-365, strand=
target 5' GGAUCAUUAUCAUGCUGAAAGUA 3'
:::::::::: :::::::::: :::::::
query 3' CCUAGUAACAGUACGA-UUUUUAU 5'
query=miR1515, target=R03G_16541, score=4, range=343-365, strand=
target 5' GGAUCAUUAUCAUGCUGAAAGUA 3'
:::::::::: :::::::::: :::::::
query 3' CCUAGUAACAGUACGA-UUUUUAU 5'
query=miR1515, target=R03G_16124, score=4, range=343-365, strand=
target 5' GGAUCAUUAUCAUGCUGAAAGUA 3'
:::::::::: :::::::::: :::::::
query 3' CCUAGUAACAGUACGA-UUUUUAU 5'
query=miR1515, target=R03G_15286, score=4, range=343-365, strand=
target 5' GGAUCAUUAUCAUGCUGAAAGUA 3'
:::::::::: :::::::::: :::::::
query 3' CCUAGUAACAGUACGA-UUUUUAU 5'
query=miR1515, target=R03G_13752, score=4, range=343-365, strand=
target 5' GGAUCAUUAUCAUGCUGAAAGUA 3'
:::::::::: :::::::::: :::::::
query 3' CCUAGUAACAGUACGA-UUUUUAU 5'
query=miR1515, target=R03G_03560, score=4, range=343-365, strand=
target 5' GGAUCAUUAUCAUGCUGAAAGUA 3'
:::::::::: :::::::::: :::::::
query 3' CCUAGUAACAGUACGA-UUUUUAU 5'
query=miR1515, target=R03G_16141, score=4, range=343-365, strand=
target 5' GGAUCAUUAUCAUGCUGAAAGUA 3'
:::::::::: :::::::::: :::::::
query 3' CCUAGUAACAGUACGA-UUUUUAU 5'
query=miR1515, target=R03G_07136, score=4, range=34-56, strand=-1
target 5' GGAUCAUUAUCAUGCUGAAAGUA 3'
:::::::::: :::::::::: :::::::
query 3' CCUAGUAACAGUACGA-UUUUUAU 5'
query=miR1515, target=R03G_11533, score=4, range=343-365, strand=
target 5' GGAUCAUUAUCAUGCUGAAAGUA 3'
:::::::::: :::::::::: :::::::
query 3' CCUAGUAACAGUACGA-UUUUUAU 5'

```

query=miR1515, target=R03G\_10785, score=4, range=343-365, strand=  
target 5' GGAUCAUUAUCAUGCUGAAAAGUA 3'  
:::::::::: :::::::::: :::::::  
query 3' CCUAGUAACAGUACGA-UUUUUAU 5'  
query=miR1515, target=R03G\_00250, score=4, range=343-365, strand=  
target 5' GGAUCAUUAUCAUGCUGAAAAGUA 3'  
:::::::::: :::::::::: :::::::  
query 3' CCUAGUAACAGUACGA-UUUUUAU 5'  
query=miR1515, target=R03G\_13267, score=4, range=343-365, strand=  
target 5' GGAUCAUUAUCAUGCUGAAAAGUA 3'  
:::::::::: :::::::::: :::::::  
query 3' CCUAGUAACAGUACGA-UUUUUAU 5'  
query=miR1515, target=R03G\_12084, score=4, range=343-365, strand=  
target 5' GGAUCAUUAUCAUGCUGAAAAGUA 3'  
:::::::::: :::::::::: :::::::  
query 3' CCUAGUAACAGUACGA-UUUUUAU 5'  
query=miR1515, target=R03G\_03797, score=4, range=208-230, strand=  
target 5' GGAUCACUGUCGUGCUGAAAAUA 3'  
:::::::::: :::::::::: :::::::  
query 3' CCUAGUAACAGUACGA-UUUUUAU 5'  
query=miR5561-5p, target=R03G\_13288, score=0, range=1229-1251,  
strand=-1  
target 5' UUGUCCAUGUCUCUCACCAAUG 3'  
:::::::::: :::::::::: :::::::  
query 3' AACAGGUACAGAGAGUGGUUUAC 5'  
query=miR5561-5p, target=R03G\_14787, score=0, range=1229-1251,  
strand=-1  
target 5' UUGUCCAUGUCUCUCACCAAUG 3'  
:::::::::: :::::::::: :::::::  
query 3' AACAGGUACAGAGAGUGGUUUAC 5'  
query=miR5561-5p, target=R03G\_14800, score=0, range=1229-1251,  
strand=-1  
target 5' UUGUCCAUGUCUCUCACCAAUG 3'  
:::::::::: :::::::::: :::::::  
query 3' AACAGGUACAGAGAGUGGUUUAC 5'  
query=miR5561-5p, target=R03G\_15875, score=0, range=1229-1251,  
strand=-1  
target 5' UUGUCCAUGUCUCUCACCAAUG 3'  
:::::::::: :::::::::: :::::::  
query 3' AACAGGUACAGAGAGUGGUUUAC 5'  
query=miR5561-5p, target=R03G\_14793, score=0, range=1229-1251,  
strand=-1  
target 5' UUGUCCAUGUCUCUCACCAAUG 3'  
:::::::::: :::::::::: :::::::  
query 3' AACAGGUACAGAGAGUGGUUUAC 5'

query=miR5561-5p, target=R03G\_17411, score=0, range=671-693, strand  
target 5' UUGUCCAUGUCUCACACAAAUG 3'  
:::::::::::::::::::  
query 3' AACAGGUACAGAGAGUGGUUUAC 5'  
query=miR5561-5p, target=R03G\_02440, score=4, range=449-471, strand  
target 5' UUGAUUAUGGCUCUCACCAGAUG 3'  
::: ..::: :::::::::::::::  
query 3' AACAGGUACAGAGAGUGGUUUAC 5'  
query=miR7502b, target=R03G\_05880, score=3, range=272-290, strand  
target 5' AUG-AUAAACUUAUUGACAA 3'  
::: :: :::::::::::::::  
query 3' UACGUACUUGAAUAAUUGUU 5'  
query=miR7502b, target=R03G\_10183, score=3.5, range=260-278, strand  
target 5' UUGC-UGAACUUAUUGACAG 3'  
::: :::::::::::::::  
query 3' UACGUACUUGAAUAAUUGUU 5'  
query=miR7502b, target=R03G\_16944, score=3.5, range=191-210, strand  
target 5' AUCUGUCAACUUUAUAACAG 3'  
:: ..: :::::::::::::::  
query 3' UACGUACUUGAAUAAUUGUU 5'  
query=miR7502b, target=R03G\_12923, score=4, range=583-602, strand  
target 5' UUGCAUGAAUUUAUUAUAUGA 3'  
:::::::::::::::::::  
query 3' UACGUACUUGAAUAAUUGUU 5'  
query=miR7502b, target=R03G\_16530, score=4, range=1012-1031, strand  
target 5' UUGAAUGAAUUUAUUAUAUA 3'  
:: :::::::::::::::  
query 3' UACGUACUUGAAUAAUUGUU 5'  
query=miR7502b, target=R03G\_02695, score=4, range=3805-3825, strand  
target 5' AUGAAUGAAUUUAUUGAACAA 3'  
::: ::::::::::: :::::  
query 3' UACGUACUUGAAUAA-UUGUU 5'  
query=miR7502b, target=R03G\_03550, score=4, range=3805-3825, strand  
target 5' AUGAAUGAAUUUAUUGAACAA 3'  
::: ::::::::::: :::::  
query 3' UACGUACUUGAAUAA-UUGUU 5'  
query=miR7502b, target=R03G\_09175, score=4, range=3805-3825, strand  
target 5' AUGAAUGAAUUUAUUGAACAA 3'  
::: ::::::::::: :::::  
query 3' UACGUACUUGAAUAA-UUGUU 5'  
query=miR7502b, target=R03G\_11541, score=4, range=1195-1215, strand  
target 5' AUGAAUGAAUUUAUUGAACAA 3'  
::: ::::::::::: :::::  
query 3' UACGUACUUGAAUAA-UUGUU 5'  
query=miR7502b, target=R03G\_08532, score=4, range=1304-1322, strand

target 5' AUGCA-GAACUUAUUAAGA 3'  
 ::::: ::::: :::  
 query 3' UACGUACUUGAAUAAUUGUU 5'  
 query=miR7502b, target=R03G\_11910, score=4, range=24-43, strand=1  
 target 5' AUCCUAAAUUUUAUUAACAA 3'  
 :: : : ::::: ::::: :::  
 query 3' UACGUACUUGAAUAAUUGUU 5'  
 query=miR7502b, target=R03G\_08587, score=4, range=2021-2039, strand=1  
 target 5' AU-CAAGAACUUAUUGACAU 3'  
 :: :: ::::: ::::: :::  
 query 3' UACGUACUUGAAUAAUUGUU 5'  
 query=miR7502b, target=R03G\_02564, score=4, range=443-461, strand=1  
 target 5' UUACA-GAAUUUUAUUAACAA 3'  
 : :: ::::: ::::: :::  
 query 3' UACGUACUUGAAUAAUUGUU 5'  
 query=miR7502b, target=R03G\_09426, score=4, range=1132-1151, strand=1  
 target 5' AAGCACAAACUUAUUAACAU 3'  
 : ::::: ::::: :::  
 query 3' UACGUACUUGAAUAAUUGUU 5'  
 query=miR7502b, target=R03G\_08891, score=4, range=109-127, strand=1  
 target 5' AUGCUCGAA-UUAUUAACAA 3'  
 ::::: ::::: ::::: :::  
 query 3' UACGUACUUGAAUAAUUGUU 5'  
 query=miR7502b, target=R03G\_06589, score=4, range=316-335, strand=1  
 target 5' GUGCUUGAGCUUAUUAUAG 3'  
 .::::: ::::: ::::: :::  
 query 3' UACGUACUUGAAUAAUUGUU 5'  
 query=miR7502b, target=R03G\_09234, score=4, range=83-101, strand=1  
 target 5' AU-CAUGGGCUUAUUAAGCAA 3'  
 :: ::::: ::::: :::  
 query 3' UACGUACUUGAAUAAUUGUU 5'  
 query=miR7502b, target=R03G\_02236, score=4, range=308-327, strand=1  
 target 5' AUUCUUGAACUUAUUAACAA 3'  
 :: : ::::: ::::: :::  
 query 3' UACGUACUUGAAUAAUUGUU 5'  
 query=miR7502b, target=R03G\_08139, score=4, range=407-427, strand=1  
 target 5' AUGACAUUAACUUAUUAUCAA 3'  
 ::::: ::::: ::::: :::  
 query 3' UAC-GUACUUGAAUAAUUGUU 5'  
 query=miR7502b, target=R03G\_08587, score=4, range=620-639, strand=1  
 target 5' UUGCUIUAACUUAUUAACAU 3'  
 ::::: : ::::: ::::: :::  
 query 3' UACGUACUUGAAUAAUUGUU 5'  
 query=miR6451, target=R03G\_15326, score=0, range=476-493, strand=1  
 target 5' AAUCAACAUGAUCUACAU 3'

```
.....:
query 3' UUAGUUGUACUAGAUGUA 5'
query=miR6451, target=R03G_15197, score=3, range=118-134, strand=
target 5' GAUU-ACAUGGUCUACAU 3'
.... :.....:
query 3' UUAGUUGUACUAGAUGUA 5'
query=miR6451, target=R03G_10684, score=3, range=987-1004, strand
target 5' UAACAACAUGAUCUACAA 3'
: :.....:
query 3' UUAGUUGUACUAGAUGUA 5'
query=miR6451, target=R03G_10673, score=3, range=987-1004, strand
target 5' UAACAACAUGAUCUACAA 3'
: :.....:
query 3' UUAGUUGUACUAGAUGUA 5'
query=miR6451, target=R03G_10669, score=3, range=987-1004, strand
target 5' UAACAACAUGAUCUACAA 3'
: :.....:
query 3' UUAGUUGUACUAGAUGUA 5'
query=miR6451, target=R03G_10667, score=3, range=114-131, strand=
target 5' UAACAACAUGAUCUACAA 3'
: :.....:
query 3' UUAGUUGUACUAGAUGUA 5'
query=miR6451, target=R03G_10128, score=3, range=524-541, strand=
target 5' AAUCAACAUGGUCUAUGU 3'
.....:
query 3' UUAGUUGUACUAGAUGUA 5'
query=miR6451, target=R03G_05236, score=3, range=734-751, strand=
target 5' UAUCAAUAUGAUCUACAA 3'
.....:
query 3' UUAGUUGUACUAGAUGUA 5'
query=miR6451, target=R03G_10142, score=3, range=806-823, strand=
target 5' CAUCAACAUGAUCAACAU 3'
.....: :
query 3' UUAGUUGUACUAGAUGUA 5'
query=miR6451, target=R03G_03107, score=3, range=806-823, strand=
target 5' CAUCAACAUGAUCAACAU 3'
.....: :
query 3' UUAGUUGUACUAGAUGUA 5'
query=miR6451, target=R03G_14682, score=3, range=527-544, strand=
target 5' AAUCAACAUGAUCUUCAG 3'
.....: :
query 3' UUAGUUGUACUAGAUGUA 5'
query=miR6451, target=R03G_14381, score=3, range=278-296, strand=
target 5' AAUCCAAUAUGAUCUACAA 3'
:: :.....:
```

query 3' UUA-GUUGUACUAGAUGUA 5'  
query=miR6451, target=R03G\_06628, score=3, range=562-580, strand=  
target 5' ACUCAACAUGAUCUACCAU 3'  
: ::::::::::::::: :::  
query 3' UUAGUUGUACUAGAU-GUA 5'  
query=miR6451, target=R03G\_00012, score=3, range=485-502, strand=  
target 5' AAGGAACAUGAUCUACAA 3'  
:: :::::::::::::::  
query 3' UUAGUUGUACUAGAUGUA 5'  
query=miR6451, target=R03G\_15271, score=3.5, range=771-788, stran  
target 5' UAUUAGCAUGAUUUACAU 3'  
: :::::::::::::::  
query 3' UUAGUUGUACUAGAUGUA 5'  
query=miR6451, target=R03G\_16725, score=3.5, range=513-530, stran  
target 5' UAUUAGCAUGAUUUACAU 3'  
: :::::::::::::::  
query 3' UUAGUUGUACUAGAUGUA 5'  
query=miR6451, target=R03G\_04929, score=3.5, range=262-279, stran  
target 5' AAUUUAUAUGAUUUACAU 3'  
: :::::::::::::::  
query 3' UUAGUUGUACUAGAUGUA 5'  
query=miR6451, target=R03G\_06872, score=3.5, range=901-918, stran  
target 5' AAUCGACCUGAUCUACAA 3'  
: :::::::::::::::  
query 3' UUAGUUGUACUAGAUGUA 5'  
query=miR6451, target=R03G\_02555, score=3.5, range=80-97, strand=  
target 5' AAUCGACAUGCUCUACAC 3'  
: :::::::::::::::  
query 3' UUAGUUGUACUAGAUGUA 5'  
query=miR6451, target=R03G\_13970, score=3.5, range=345-362, stran  
target 5' AAUGGGCAUGAUCUACAG 3'  
: :::::::::::::::  
query 3' UUAGUUGUACUAGAUGUA 5'  
query=miR6451, target=R03G\_08163, score=3.5, range=109-126, stran  
target 5' GAACAACAUUAUCUACAU 3'  
.: :::::::::::::::  
query 3' UUAGUUGUACUAGAUGUA 5'  
query=miR6451, target=R03G\_05137, score=3.5, range=781-799, stran  
target 5' GAUCAACAUGAUCUACAA 3'  
: :::::::::::::::  
query 3' UUAGUUGUACUAG-AUGUA 5'  
query=miR6451, target=R03G\_01516, score=3.5, range=2393-2410,  
strand=-1  
target 5' AAGUAACUUGAUCUACAU 3'  
: :::::::::::::::

query 3' UUAGUUGUACUAGAUGUA 5'  
query=miR6451, target=R03G\_11852, score=3.5, range=542-559, stran  
target 5' AGUCCACAUGAUCAACAU 3'  
.:.: :.:.:.: :.:.:  
query 3' UUAGUUGUACUAGAUGUA 5'  
query=miR6451, target=R03G\_07782, score=3.5, range=362-379, stran  
target 5' AGACAACAUGAUCAACAU 3'  
.: :.:.:.:.: :.:.:  
query 3' UUAGUUGUACUAGAUGUA 5'  
query=miR6451, target=R03G\_10993, score=3.5, range=1-19, strand=-  
target 5' ACUCAGCAUGAUCUAUCAU 3'  
: :.:.:.:.:.: :.:  
query 3' UUAGUUGUACUAGAU-GUA 5'  
query=miR6451, target=R03G\_00841, score=3.5, range=1016-1032,  
strand=-1  
target 5' GAU-AACAUGAUCUAAAU 3'  
.:.: :.:.:.:.:.: :.:  
query 3' UUAGUUGUACUAGAUGUA 5'  
query=miR6451, target=R03G\_14199, score=4, range=3412-3429, stran  
target 5' AAUCAACAUGGUUUGCAG 3'  
:.:.:.:.:.:.:.:.:  
query 3' UUAGUUGUACUAGAUGUA 5'  
query=miR6451, target=R03G\_02771, score=4, range=1093-1110, stran  
target 5' GAUCGGCAUGAUUUACAA 3'  
.:.:.:.:.:.:.:.:  
query 3' UUAGUUGUACUAGAUGUA 5'  
query=miR6451, target=R03G\_08859, score=4, range=100-118, strand=  
target 5' AAUCAACAUGAUCUCGUAU 3'  
:.:.:.:.:.:.: :.:.:  
query 3' UUAGUUGUACUAGA-UGUA 5'  
query=miR6451, target=R03G\_01352, score=4, range=1393-1410, stran  
target 5' GAUUUACAUGGUUUACAU 3'  
.:.: :.:.:.:.:.: :.:  
query 3' UUAGUUGUACUAGAUGUA 5'  
query=miR6451, target=R03G\_15840, score=4, range=7813-7830, stran  
target 5' AAUCAACAUGGUGUACAA 3'  
:.:.:.:.:.:.: :.:.:  
query 3' UUAGUUGUACUAGAUGUA 5'  
query=miR6451, target=R03G\_00403, score=4, range=7825-7842, stran  
target 5' AAUCAACCUGAUUUACAC 3'  
:.:.:.: :.:.:.: :.:.:  
query 3' UUAGUUGUACUAGAUGUA 5'  
query=miR6451, target=R03G\_05460, score=4, range=273-290, strand=  
target 5' CAUCAACGUGAUCUUCAU 3'  
:.:.:.:.:.:.: :.:.



query 3' UUAGUUGUACUAGAUGUA 5'  
query=miR6451, target=R03G\_07629, score=4, range=252-270, strand=  
target 5' CAUCAACAUGAUUUUAUCAU 3'  
..... ::  
query 3' UUAGUUGUACUAGAU-GUA 5'  
query=miR6451, target=R03G\_00880, score=4, range=1080-1097, stran  
target 5' UAUUGUCAUGAUCUACAU 3'  
.... ::  
query 3' UUAGUUGUACUAGAUGUA 5'  
query=miR6451, target=R03G\_00324, score=4, range=817-834, strand=  
target 5' AAUCAACAUCAACAUCAU 3'  
..... ::  
query 3' UUAGUUGUACUAGAUGUA 5'  
query=miR6451, target=R03G\_05836, score=4, range=118-134, strand=  
target 5' GAUU-ACAUGGUUUACAU 3'  
.... ::  
query 3' UUAGUUGUACUAGAUGUA 5'  
query=miR6451, target=R03G\_15359, score=4, range=106-123, strand=  
target 5' CUUCAACAUGAUCUAGAU 3'  
..... ::  
query 3' UUAGUUGUACUAGAUGUA 5'  
query=miR6451, target=R03G\_15507, score=4, range=5107-5124, stran  
target 5' AUUCAACAUGAUCCACAA 3'  
: ..... ::  
query 3' UUAGUUGUACUAGAUGUA 5'  
query=miR6451, target=R03G\_11284, score=4, range=1720-1736, stran  
target 5' AAUAAACAUGGUCU-CAU 3'  
:: ..... ::  
query 3' UUAGUUGUACUAGAUGUA 5'  
query=miR6451, target=R03G\_13853, score=4, range=766-782, strand=  
target 5' AAUAAACAUGGUCU-CAU 3'  
:: ..... ::  
query 3' UUAGUUGUACUAGAUGUA 5'  
query=miR6451, target=R03G\_00705, score=4, range=1720-1736, stran  
target 5' AAUAAACAUGGUCU-CAU 3'  
:: ..... ::  
query 3' UUAGUUGUACUAGAUGUA 5'  
query=miR6451, target=R03G\_03562, score=4, range=1450-1466, stran  
target 5' AAUAAACAUGGUCU-CAU 3'  
:: ..... ::  
query 3' UUAGUUGUACUAGAUGUA 5'  
query=miR6451, target=R03G\_10802, score=4, range=838-854, strand=  
target 5' AAUAAACAUGGUCU-CAU 3'  
:: ..... ::  
query 3' UUAGUUGUACUAGAUGUA 5'

query=miR6451, target=R03G\_06473, score=4, range=283-299, strand=  
target 5' AAU-AAUGAUGAUAACAC 3'  
::: ::::::::::: :::  
query 3' UUAGUUGUACUAGAUGUA 5'  
query=miR6451, target=R03G\_04493, score=4, range=258-274, strand=  
target 5' AAUACACAUGAUCU-CAU 3'  
::: ::::::::::: :::  
query 3' UUAGUUGUACUAGAUGUA 5'  
query=miR6451, target=R03G\_01109, score=4, range=26-43, strand=-1  
target 5' AAUUGACAUGGUCUGCAG 3'  
:.....:.....:  
query 3' UUAGUUGUACUAGAUGUA 5'  
query=miR6451, target=R03G\_08530, score=4, range=1979-1996, stran  
target 5' AAUCAGCAUGAUUUUCAU 3'  
:.....:.....: :::  
query 3' UUAGUUGUACUAGAUGUA 5'  
query=miR6451, target=R03G\_12313, score=4, range=647-664, strand=  
target 5' AAUCAACAUCUCUGUAU 3'  
:.....:.....: :::  
query 3' UUAGUUGUACUAGAUGUA 5'  
query=miR6451, target=R03G\_06338, score=4, range=176-193, strand=  
target 5' AAUCAACAUGACUUGCAU 3'  
:.....:.....: .:.....:  
query 3' UUAGUUGUACUAGAUGUA 5'  
query=miR6451, target=R03G\_11327, score=4, range=322-339, strand=  
target 5' GGUCAACAUGAUAACGU 3'  
.:.....:.....: ::::  
query 3' UUAGUUGUACUAGAUGUA 5'  
query=miR6451, target=R03G\_15840, score=4, range=5083-5100, stran  
target 5' AAUCAAAAUGAUCUGCAG 3'  
:.....:.....: :::  
query 3' UUAGUUGUACUAGAUGUA 5'  
query=miR6451, target=R03G\_12170, score=4, range=668-685, strand=  
target 5' UAUCAAUAAGAUCUACAU 3'  
:.....:.....: :::  
query 3' UUAGUUGUACUAGAUGUA 5'  
query=miR6451, target=R03G\_01715, score=4, range=668-685, strand=  
target 5' UAUCAAUAAGAUCUACAU 3'  
:.....:.....: :::  
query 3' UUAGUUGUACUAGAUGUA 5'  
query=miR6451, target=R03G\_03739, score=4, range=626-644, strand=  
target 5' AAUGCAACAUGGUCUGCAG 3'  
::: ::::::::::: .....:  
query 3' UUA-GUUGUACUAGAUGUA 5'  
query=miR6451, target=R03G\_13376, score=4, range=72-88, strand=-1

```
target 5' AAUCAACAUGGUCUA-GU 3'
: : : : : : : : : : : : : : : :
query 3' UUAGUUGUACUAGAUGUA 5'
query=miR6451, target=R03G_14681, score=4, range=1223-1241, stran
target 5' UGUUGAACAUUGGUCUACAU 3'
. . . : : : : : : : : : :
query 3' UUAG-UUGUACUAGAUGUA 5'
query=miR6451, target=R03G_15110, score=4, range=1079-1096, stran
target 5' AAUCACCAUGAUCUUCAU 3'
: : : : : : : : : : : :
query 3' UUAGUUGUACUAGAUGUA 5'
query=miR6451, target=R03G_04172, score=4, range=1502-1519, stran
target 5' AAUGAACAUGAUUUUCAU 3'
: : : : : : : : : : : :
query 3' UUAGUUGUACUAGAUGUA 5'
query=miR6451, target=R03G_14952, score=4, range=437-454, strand=
target 5' AAACAACAAGGUCUACAU 3'
: : : : : : : : : : : :
query 3' UUAGUUGUACUAGAUGUA 5'
query=miR6451, target=R03G_06602, score=4, range=200-217, strand=
target 5' AUUCAACAUCAUCUGCAU 3'
: : : : : : : : : : : :
query 3' UUAGUUGUACUAGAUGUA 5'
query=miR6451, target=R03G_00014, score=4, range=745-762, strand=
target 5' GAGUAACAUGAUGUACAU 3'
. . . : : : : : : : : : :
query 3' UUAGUUGUACUAGAUGUA 5'
query=miR6451, target=R03G_14511, score=4, range=203-220, strand=
target 5' AAGCUGCGUGAUCUACAU 3'
: : : : . . . : : : : : : :
query 3' UUAGUUGUACUAGAUGUA 5'
query=miR6451, target=R03G_16094, score=4, range=185-201, strand=
target 5' AAUCAACAUGAUC-AUAG 3'
: : : : : : : : : : : :
query 3' UUAGUUGUACUAGAUGUA 5'
query=miR6451, target=R03G_06402, score=4, range=728-745, strand=
target 5' AAUCUACAAGAUCUACAC 3'
: : : : : : : : : : : :
query 3' UUAGUUGUACUAGAUGUA 5'
query=miR6451, target=R03G_08950, score=4, range=170-187, strand=
target 5' AAUAAACAGGAUCUACAG 3'
: : : : : : : : : : : :
query 3' UUAGUUGUACUAGAUGUA 5'
query=miR6451, target=R03G_12257, score=4, range=462-478, strand=
target 5' GAUU-AUAUGAUCUACAA 3'
```

... ..  
query 3' UUAGUUGUACUAGAUGUA 5'  
query=miR6451, target=R03G\_09820, score=4, range=149-166, strand=  
target 5' AAGCAACAUUAUCUACAC 3'  
:: .....

query 3' UUAGUUGUACUAGAUGUA 5'  
query=miR6451, target=R03G\_00155, score=4, range=341-359, strand=  
target 5' UAUCCAACAUGAUCAACAU 3'  
:: .....

query 3' UUA-GUUGUACUAGAUGUA 5'  
query=miR6451, target=R03G\_06617, score=4, range=431-447, strand=  
target 5' AAUCAACAUGA-AUACAU 3'  
: .....

query 3' UUAGUUGUACUAGAUGUA 5'  
query=miR6451, target=R03G\_02490, score=4, range=926-943, strand=  
target 5' CACCUACAUGAUCUGCAU 3'  
: : .....

query 3' UUAGUUGUACUAGAUGUA 5'  
query=miR6451, target=R03G\_02518, score=4, range=452-468, strand=  
target 5' AAU-AGCAUGAUCUAAAU 3'  
:: .....

query 3' UUAGUUGUACUAGAUGUA 5'  
query=miR6451, target=R03G\_05989, score=4, range=261-277, strand=  
target 5' AUUCAGCAUGAU-UACAU 3'  
: .....

query 3' UUAGUUGUACUAGAUGUA 5'  
query=miR6451, target=R03G\_06636, score=4, range=1004-1021, stran  
target 5' CCUCUACAUGAUCUACAG 3'  
:: .....

query 3' UUAGUUGUACUAGAUGUA 5'  
query=miR6451, target=R03G\_02449, score=4, range=416-433, strand=  
target 5' AAAGAACAUUAUCUACAU 3'  
:: .....

query 3' UUAGUUGUACUAGAUGUA 5'  
query=miR6451, target=R03G\_15432, score=4, range=731-747, strand=  
target 5' AAUCAA-ACGAUCUACAU 3'  
: : .....

query 3' UUAGUUGUACUAGAUGUA 5'  
query=miR951, target=R03G\_04122, score=0, range=196-217, strand=1  
target 5' CGUAGCCAGAUCGUCAAGAGCA 3'  
: .....

query 3' GCAUCGGUCUAGCAGUUCUCGU 5'  
query=miR951, target=R03G\_13220, score=0, range=196-217, strand=1  
target 5' CGUAGCCAGAUCGUCAAGAGCA 3'  
: .....

query 3' GCAUCGGUCUAGCAGUUCUCGU 5'  
query=miR951, target=R03G\_04124, score=0, range=196-217, strand=1  
target 5' CGUAGCCAGAUCGUCAAGAGCA 3'  
.....  
query 3' GCAUCGGUCUAGCAGUUCUCGU 5'  
query=miR951, target=R03G\_13223, score=0.5, range=196-217, strand  
target 5' CGUAGUCAGAUCGUCAAGAGCA 3'  
.....  
query 3' GCAUCGGUCUAGCAGUUCUCGU 5'  
query=miR951, target=R03G\_04119, score=2, range=196-217, strand=1  
target 5' CGUAGCCAGAUGGUCAAGAGCA 3'  
..... : ..  
query 3' GCAUCGGUCUAGCAGUUCUCGU 5'  
query=miR7716-3p, target=R03G\_17338, score=0, range=3-24, strand=  
target 5' GGCAUUACUGGAGGAUGAAGAA 3'  
.....  
query 3' CCGUAAUGACCUCUACUUCUU 5'  
query=miR7716-3p, target=R03G\_07958, score=3.5, range=3070-3090,  
strand=1  
target 5' GACG-UGUUGGAGGAUGAAGAA 3'  
: .. : ..  
query 3' CCGUAAUGACCUCUACUUCUU 5'  
query=miR7716-3p, target=R03G\_12741, score=4, range=1170-1191,  
strand=1  
target 5' GAUGGUGCUGGAGGAUGAAGAG 3'  
: .. : ..  
query 3' CCGUAAUGACCUCUACUUCUU 5'  
query=miR7716-3p, target=R03G\_14666, score=4, range=840-860, stra  
target 5' AGCAUUAUGGA-GAUGAAGAA 3'  
: .. : .. : ..  
query 3' CCGUAAUGACCUCUACUUCUU 5'  
query=miR8741, target=R03G\_13273, score=0, range=2206-2227, stran  
target 5' CCAUCAUCAUUCUUCAGGCCA 3'  
: .. : .. : ..  
query 3' GGUAGUAGUAAGUAAGUCCGGU 5'  
query=miR8741, target=R03G\_10217, score=0, range=2206-2227, stran  
target 5' CCAUCAUCAUUCUUCAGGCCA 3'  
: .. : .. : ..  
query 3' GGUAGUAGUAAGUAAGUCCGGU 5'  
query=miR8741, target=R03G\_16749, score=0, range=2206-2227, stran  
target 5' CCAUCAUCAUUCUUCAGGCCA 3'  
: .. : .. : ..  
query 3' GGUAGUAGUAAGUAAGUCCGGU 5'  
query=miR8741, target=R03G\_13145, score=0, range=2206-2227, stran  
target 5' CCAUCAUCAUUCUUCAGGCCA 3'

query 3' GGUAGUAGUAAGUAAGUCCGGU 5'  
query=miR8741, target=R03G\_17257, score=0, range=2122-2143, stran  
target 5' CCAUCAUCAUUCAUUCAGGCCA 3'

query 3' GGUAGUAGUAAGUAAGUCCGGU 5'  
query=miR8741, target=R03G\_05424, score=0, range=2122-2143, stran  
target 5' CCAUCAUCAUUCAUUCAGGCCA 3'

query 3' GGUAGUAGUAAGUAAGUCCGGU 5'  
query=miR8741, target=R03G\_15889, score=0, range=2122-2143, stran  
target 5' CCAUCAUCAUUCAUUCAGGCCA 3'

query 3' GGUAGUAGUAAGUAAGUCCGGU 5'  
query=miR8741, target=R03G\_16136, score=0, range=2122-2143, stran  
target 5' CCAUCAUCAUUCAUUCAGGCCA 3'

query 3' GGUAGUAGUAAGUAAGUCCGGU 5'  
query=miR8741, target=R03G\_04592, score=0, range=1378-1399, stran  
target 5' CCAUCAUCAUUCAUUCAGGCCA 3'

query 3' GGUAGUAGUAAGUAAGUCCGGU 5'  
query=miR8741, target=R03G\_09183, score=0, range=1339-1360, stran  
target 5' CCAUCAUCAUUCAUUCAGGCCA 3'

query 3' GGUAGUAGUAAGUAAGUCCGGU 5'  
query=miR8741, target=R03G\_00289, score=0, range=940-961, strand=  
target 5' CCAUCAUCAUUCAUUCAGGCCA 3'

query 3' GGUAGUAGUAAGUAAGUCCGGU 5'  
query=miR8741, target=R03G\_17351, score=0, range=934-955, strand=  
target 5' CCAUCAUCAUUCAUUCAGGCCA 3'

query 3' GGUAGUAGUAAGUAAGUCCGGU 5'  
query=miR8741, target=R03G\_04681, score=0, range=796-817, strand=  
target 5' CCAUCAUCAUUCAUUCAGGCCA 3'

query 3' GGUAGUAGUAAGUAAGUCCGGU 5'  
query=miR8741, target=R03G\_07697, score=0, range=532-553, strand=  
target 5' CCAUCAUCAUUCAUUCAGGCCA 3'

query 3' GGUAGUAGUAAGUAAGUCCGGU 5'  
query=miR8741, target=R03G\_10040, score=0, range=796-817, strand=  
target 5' CCAUCAUCAUUCAUUCAGGCCA 3'

query 3' GGUAGUAGUAAGUAAGUCCGGU 5'  
query=miR8741, target=R03G\_10735, score=2.5, range=1651-1672, str  
target 5' CCAUCAUCAUUCUUCAGGCGG 3'  
.:.:

query 3' GGUAGUAGUAAGUAAGUCCGGU 5'  
query=miR913-5p, target=R03G\_15268, score=0, range=472-492, stran  
target 5' CCUCGGUCUCGCAAGAUGUCA 3'  
.:.:

query 3' GGAGCCAGAGCGUUCUACAGU 5'  
query=miR913-5p, target=R03G\_04121, score=0, range=472-492, stran  
target 5' CCUCGGUCUCGCAAGAUGUCA 3'  
.:.:

query 3' GGAGCCAGAGCGUUCUACAGU 5'  
query=miR913-5p, target=R03G\_16800, score=0, range=472-492, stran  
target 5' CCUCGGUCUCGCAAGAUGUCA 3'  
.:.:

query 3' GGAGCCAGAGCGUUCUACAGU 5'  
query=miR913-5p, target=R03G\_15265, score=0, range=472-492, stran  
target 5' CCUCGGUCUCGCAAGAUGUCA 3'  
.:.:

query 3' GGAGCCAGAGCGUUCUACAGU 5'  
query=miR913-5p, target=R03G\_13219, score=0, range=472-492, stran  
target 5' CCUCGGUCUCGCAAGAUGUCA 3'  
.:.:

query 3' GGAGCCAGAGCGUUCUACAGU 5'  
query=miR913-5p, target=R03G\_13217, score=4, range=472-492, stran  
target 5' CCUCGGUCCCGUAAGAUGUCU 3'  
.:.:

query 3' GGAGCCAGAGCGUUCUACAGU 5'  
query=miR913-5p, target=R03G\_14352, score=4, range=472-492, stran  
target 5' CCUCGGUCCCGUAAGAUGUCU 3'  
.:.:

query 3' GGAGCCAGAGCGUUCUACAGU 5'  
query=miR913-5p, target=R03G\_15266, score=4, range=472-492, stran  
target 5' CCUCGGUCCCGUAAGAUGUCU 3'  
.:.:

query 3' GGAGCCAGAGCGUUCUACAGU 5'  
query=miR8603, target=R03G\_05069, score=3.5, range=1125-1145,  
strand=-1  
target 5' ACUAUAUUCAUCAACAAGCUCA 3'  
.:.:

query 3' UGUUACGAGUGGUGUUCGAGU 5'  
query=miR8603, target=R03G\_05236, score=4, range=15-36, strand=1  
target 5' ACAAUUGCUCUCAACAAGUUUA 3'  
.:.:

query 3' UGUU-ACGAGUGGUGUUCGAGU 5'  
query=miR5641, target=R03G\_17273, score=2.5, range=1754-1776,  
strand=-1  
target 5' UAGUUCUUUACUGUCUUCUCCA 3'  
.....  
query 3' AUUAAGAAAUGAUAGAAGGAGGU 5'  
query=miR5641, target=R03G\_15160, score=2.5, range=1652-1674,  
strand=-1  
target 5' UAGUUCUUUACUGUCUUCUCCA 3'  
.....  
query 3' AUUAAGAAAUGAUAGAAGGAGGU 5'  
query=miR5641, target=R03G\_03100, score=4, range=3206-3228, stran  
target 5' UAGUUCUUUGCUAUCCUCUCCA 3'  
.....  
query 3' AUUAAGAAAUGAUAGAAGGAGGU 5'  
query=miR5641, target=R03G\_05340, score=4, range=1589-1611, stran  
target 5' UAGUUCUUUGCUAUCCUCUCCA 3'  
.....  
query 3' AUUAAGAAAUGAUAGAAGGAGGU 5'  
query=miR4401b, target=R03G\_17451, score=0, range=70-89, strand=1  
target 5' UUGCUCACAACCGUCUUUGA 3'  
.....  
query 3' AACGAGUGUUGGCAGAAACU 5'  
query=miR4401b, target=R03G\_13914, score=0, range=829-848, strand  
target 5' UUGCUCACAACCGUCUUUGA 3'  
.....  
query 3' AACGAGUGUUGGCAGAAACU 5'  
query=miR4401b, target=R03G\_12058, score=0, range=829-848, strand  
target 5' UUGCUCACAACCGUCUUUGA 3'  
.....  
query 3' AACGAGUGUUGGCAGAAACU 5'  
query=miR4401b, target=R03G\_14983, score=0, range=634-653, strand  
target 5' UUGCUCACAACCGUCUUUGA 3'  
.....  
query 3' AACGAGUGUUGGCAGAAACU 5'  
query=miR4401b, target=R03G\_10801, score=0, range=634-653, strand  
target 5' UUGCUCACAACCGUCUUUGA 3'  
.....  
query 3' AACGAGUGUUGGCAGAAACU 5'  
query=miR4401b, target=R03G\_09614, score=0, range=160-179, strand  
target 5' UUGCUCACAACCGUCUUUGA 3'  
.....  
query 3' AACGAGUGUUGGCAGAAACU 5'  
query=miR4401b, target=R03G\_17462, score=0, range=961-980, strand  
target 5' UUGCUCACAACCGUCUUUGA 3'



query 3' AACGAGUGUUGGCAGAAACU 5'  
query=miR4401b, target=R03G\_02233, score=0, range=358-377, strand  
target 5' UUGCUCACAACCGUCUUUGA 3'

query 3' AACGAGUGUUGGCAGAAACU 5'  
query=miR4401b, target=R03G\_12667, score=2, range=199-218, strand  
target 5' UUGCUCACAACCGUCUUGGA 3'

query 3' AACGAGUGUUGGCAGAAACU 5'  
query=miR4401b, target=R03G\_03583, score=2, range=634-653, strand  
target 5' UUGCUCACAACAGUCUUUGA 3'

query 3' AACGAGUGUUGGCAGAAACU 5'  
query=miR4401b, target=R03G\_16714, score=3.5, range=187-206, strand  
target 5' UUGUUGACAACCGUCUUAGA 3'

query 3' AACGAGUGUUGGCAGAAACU 5'  
query=miR4401b, target=R03G\_04116, score=3.5, range=194-213, strand  
target 5' UUGUUGACAACCGUCUUAGA 3'

query 3' AACGAGUGUUGGCAGAAACU 5'  
query=miR4401b, target=R03G\_01079, score=3.5, range=466-486, strand  
target 5' UGGCUCACCAACCGUUUUUGG 3'

query 3' AACGAGU-GUUGGCAGAAACU 5'  
query=miR4401b, target=R03G\_01425, score=3.5, range=1419-1437,  
strand=-1  
target 5' UUUCUU-CAACCGUUUUUGA 3'

query 3' AACGAGUGUUGGCAGAAACU 5'  
query=miR4401b, target=R03G\_03120, score=3.5, range=1419-1437,  
strand=-1  
target 5' UUUCUU-CAACCGUUUUUGA 3'

query 3' AACGAGUGUUGGCAGAAACU 5'  
query=miR4401b, target=R03G\_16566, score=3.5, range=1419-1437,  
strand=-1  
target 5' UUUCUU-CAACCGUUUUUGA 3'

query 3' AACGAGUGUUGGCAGAAACU 5'  
query=miR4401b, target=R03G\_13806, score=3.5, range=1419-1437,  
strand=-1  
target 5' UUUCUU-CAACCGUUUUUGA 3'

query 3' AACGAGUGUUGGCAGAAACU 5'  
query=miR4401b, target=R03G\_14533, score=3.5, range=1224-1242,  
strand=-1  
target 5' UUUCUU-CAACCGUUUUUGA 3'  
:: ::. :::::::::::::::  
query 3' AACGAGUGUUGGCAGAAACU 5'  
query=miR4401b, target=R03G\_08383, score=4, range=281-300, strand  
target 5' UUGCUCGCAGCCGUCUUGG 3'  
:::::::::::::::::: :.  
query 3' AACGAGUGUUGGCAGAAACU 5'  
query=miR4401b, target=R03G\_12286, score=4, range=242-260, strand  
target 5' UUUCUGA-AACCGUCUUUGA 3'  
:: :: : :::::::::::::::  
query 3' AACGAGUGUUGGCAGAAACU 5'  
query=miR4401b, target=R03G\_07324, score=4, range=567-586, strand  
target 5' UGGCUGCCAAUCGUCUUUGA 3'  
: ::: :::::::::::::::  
query 3' AACGAGUGUUGGCAGAAACU 5'  
query=miR4401b, target=R03G\_08428, score=4, range=401-419, strand  
target 5' CUUCUCAC-ACCGUCUUUGA 3'  
: ::::: :::::::::::::::  
query 3' AACGAGUGUUGGCAGAAACU 5'  
query=miR4401b, target=R03G\_11133, score=4, range=95-113, strand=  
target 5' UUGCUC-CAAUAGUCUUUGA 3'  
:::::: :::. :::::::::::  
query 3' AACGAGUGUUGGCAGAAACU 5'  
query=miR171n-5p, target=R03G\_09180, score=0, range=1134-1154,  
strand=-1  
target 5' CCGUACUUGAACCCACCAAUA 3'  
:::::::::::::::::::  
query 3' GGCAUGAACUUGGGUGGUUUAU 5'  
query=miR171n-5p, target=R03G\_16812, score=0, range=1134-1154,  
strand=-1  
target 5' CCGUACUUGAACCCACCAAUA 3'  
:::::::::::::::::::  
query 3' GGCAUGAACUUGGGUGGUUUAU 5'  
query=miR171n-5p, target=R03G\_09189, score=0, range=1134-1154,  
strand=-1  
target 5' CCGUACUUGAACCCACCAAUA 3'  
:::::::::::::::::::  
query 3' GGCAUGAACUUGGGUGGUUUAU 5'  
query=miR171n-5p, target=R03G\_14798, score=0, range=1134-1154,  
strand=-1  
target 5' CCGUACUUGAACCCACCAAUA 3'  
:::::::::::::::::::

query 3' GGCAUGAACUUGGGUGGUUUAU 5'  
query=miR171n-5p, target=R03G\_14791, score=0, range=1134-1154,  
strand=-1  
target 5' CCGUACUUGAACCCACCAAUA 3'  
::::::::::::::::::::::::::  
query 3' GGCAUGAACUUGGGUGGUUUAU 5'  
query=miR171n-5p, target=R03G\_16733, score=0, range=1134-1154,  
strand=-1  
target 5' CCGUACUUGAACCCACCAAUA 3'  
::::::::::::::::::::::::::  
query 3' GGCAUGAACUUGGGUGGUUUAU 5'  
query=miR171n-5p, target=R03G\_15270, score=0, range=183-203, stra  
target 5' CCGUACUUGAACCCACCAAUA 3'  
::::::::::::::::::::::::::  
query 3' GGCAUGAACUUGGGUGGUUUAU 5'  
query=miR171n-5p, target=R03G\_06734, score=0, range=438-458, stra  
target 5' CCGUACUUGAACCCACCAAUA 3'  
::::::::::::::::::::::::::  
query 3' GGCAUGAACUUGGGUGGUUUAU 5'  
query=miR171n-5p, target=R03G\_17260, score=1, range=1013-1033,  
strand=-1  
target 5' CCAUACUUGAACCCACCAAUA 3'  
:: ::::::::::::::::::::::  
query 3' GGCAUGAACUUGGGUGGUUUAU 5'  
query=miR171n-5p, target=R03G\_01819, score=4, range=1809-1828,  
strand=1  
target 5' UUUUA-UUGAACCUACCAAUA 3'  
.. :: ::::::::::::::::::::::  
query 3' GGCAUGAACUUGGGUGGUUUAU 5'  
query=miR1431, target=R03G\_11979, score=4, range=619-641, strand=  
target 5' GUCAAGCUGUGGCCAAUGCCAAA 3'  
:::::::::: ::::::::::. ::::::  
query 3' CAGUUCGCCACCGGUUGAGGUUU 5'  
query=miR1431, target=R03G\_17253, score=4, range=635-657, strand=  
target 5' GUCAAGCUGUGGCCAAUGCCAAA 3'  
:::::::::: ::::::::::. ::::::  
query 3' CAGUUCGCCACCGGUUGAGGUUU 5'  
query=miR158-3p, target=R03G\_02126, score=2, range=520-540, stran  
target 5' GCAUUUGUCUACGUUUGGAAA 3'  
:: ::::::::::::::::::::::  
query 3' CG-AAACAGAUGUAAACCUUU 5'  
query=miR158-3p, target=R03G\_05865, score=4, range=2734-2753, str  
target 5' GCUUUGUCUACAUCUGAAAA 3'  
:::::::::: :: ::::  
query 3' CGAAACAGAUGUAAACCUUU 5'

query=miR158-3p, target=R03G\_02707, score=4, range=631-650, stran  
target 5' GCUUUGUCUACAUCUGAAAA 3'  
:::::::::: :: ::  
query 3' CGAAACAGAUGUAAACCUUU 5'  
query=miR158-3p, target=R03G\_17446, score=4, range=3082-3101, str  
target 5' GCUUUGUCUACAUCUGAAAA 3'  
:::::::::: :: ::  
query 3' CGAAACAGAUGUAAACCUUU 5'  
query=miR158-3p, target=R03G\_15863, score=4, range=10-29, strand=  
target 5' GCUUUGUCUACAUCUGAAAA 3'  
:::::::::: :: ::  
query 3' CGAAACAGAUGUAAACCUUU 5'  
query=miR158-3p, target=R03G\_01733, score=4, range=2884-2903, str  
target 5' GCUUUGUCUACAUCUGAAAA 3'  
:::::::::: :: ::  
query 3' CGAAACAGAUGUAAACCUUU 5'  
query=miR158-3p, target=R03G\_11945, score=4, range=10-29, strand=  
target 5' GCUUUGUCUACAUCUGAAAA 3'  
:::::::::: :: ::  
query 3' CGAAACAGAUGUAAACCUUU 5'  
query=miR158-3p, target=R03G\_10420, score=4, range=3082-3101, str  
target 5' GCUUUGUCUACAUCUGAAAA 3'  
:::::::::: :: ::  
query 3' CGAAACAGAUGUAAACCUUU 5'  
query=miR158-3p, target=R03G\_02966, score=4, range=2353-2372, str  
target 5' GCUUUGUCUACAUCUGAAAA 3'  
:::::::::: :: ::  
query 3' CGAAACAGAUGUAAACCUUU 5'  
query=miR158-3p, target=R03G\_10991, score=4, range=3082-3101, str  
target 5' GCUUUGUCUACAUCUGAAAA 3'  
:::::::::: :: ::  
query 3' CGAAACAGAUGUAAACCUUU 5'  
query=miR158-3p, target=R03G\_01944, score=4, range=3082-3101, str  
target 5' GCUUUGUCUACAUCUGAAAA 3'  
:::::::::: :: ::  
query 3' CGAAACAGAUGUAAACCUUU 5'  
query=miR158-3p, target=R03G\_13849, score=4, range=3082-3101, str  
target 5' GCUUUGUCUACAUCUGAAAA 3'  
:::::::::: :: ::  
query 3' CGAAACAGAUGUAAACCUUU 5'  
query=miR158-3p, target=R03G\_06502, score=4, range=2959-2978, str  
target 5' GCUUUGUCUACAUCUGAAAA 3'  
:::::::::: :: ::  
query 3' CGAAACAGAUGUAAACCUUU 5'  
query=miR158-3p, target=R03G\_17287, score=4, range=3082-3101, str

```

target 5' GCUUUGUCUACAUCUGAAAA 3'
:::::::::: :: :::
query 3' CGAAACAGAUGUAAACCUUU 5'
query=miR158-3p, target=R03G_03749, score=4, range=3082-3101, str
target 5' GCUUUGUCUACAUCUGAAAA 3'
:::::::::: :: :::
query 3' CGAAACAGAUGUAAACCUUU 5'
query=miR158-3p, target=R03G_15573, score=4, range=3082-3101, str
target 5' GCUUUGUCUACAUCUGAAAA 3'
:::::::::: :: :::
query 3' CGAAACAGAUGUAAACCUUU 5'
query=miR158-3p, target=R03G_07325, score=4, range=1306-1325, str
target 5' GCUUUGGUUACAUUUGAAAA 3'
:::::: .:::::::::: :::
query 3' CGAAACAGAUGUAAACCUUU 5'
query=miR158-3p, target=R03G_09758, score=4, range=3112-3131, str
target 5' GCUUUUGCUACAUUAGGAAA 3'
:::::: :::::::::: ::::::
query 3' CGAAACAGAUGUAAACCUUU 5'
query=miR158-3p, target=R03G_06983, score=4, range=895-914, stran
target 5' GCUUGGUCUACAUCUGGAAU 3'
:::: :::::::::: ::::::
query 3' CGAAACAGAUGUAAACCUUU 5'
query=miR158-3p, target=R03G_08644, score=4, range=829-847, stran
target 5' GUGUUG-CUAUAAUUUGGAAG 3'
.. ::: ::::::::::::::.
query 3' CGAAACAGAUGUAAACCUUU 5'
query=miR158-3p, target=R03G_17196, score=4, range=215-233, stran
target 5' GCAUUG-CUACAUUUGAAAA 3'
:: ::: :::::::::: ::
query 3' CGAAACAGAUGUAAACCUUU 5'
query=miR1146, target=R03G_06423, score=0, range=518-538, strand=
target 5' AAGACUUCCCGUCGGACCCAA 3'
::::::::::
query 3' UUCUGAAGGGCAGCCUGGGUU 5'
query=miR1146, target=R03G_10235, score=0, range=464-484, strand=
target 5' AAGACUUCCCGUCGGACCCAA 3'
::::::::::
query 3' UUCUGAAGGGCAGCCUGGGUU 5'
query=miR1146, target=R03G_09483, score=0, range=464-484, strand=
target 5' AAGACUUCCCGUCGGACCCAA 3'
::::::::::
query 3' UUCUGAAGGGCAGCCUGGGUU 5'
query=miR1146, target=R03G_06441, score=0, range=464-484, strand=
target 5' AAGACUUCCCGUCGGACCCAA 3'

```

query 3' UUCUGAAGGGCAGCCUGGGUU 5'  
query=miR1146, target=R03G\_09499, score=0, range=464-484, strand=  
target 5' AAGACUUCCCGUCGGACCCAA 3'

query 3' UUCUGAAGGGCAGCCUGGGUU 5'  
query=miR1146, target=R03G\_15675, score=0, range=464-484, strand=  
target 5' AAGACUUCCCGUCGGACCCAA 3'

query 3' UUCUGAAGGGCAGCCUGGGUU 5'  
query=miR1146, target=R03G\_11401, score=0, range=464-484, strand=  
target 5' AAGACUUCCCGUCGGACCCAA 3'

query 3' UUCUGAAGGGCAGCCUGGGUU 5'  
query=miR1146, target=R03G\_07875, score=0, range=464-484, strand=  
target 5' AAGACUUCCCGUCGGACCCAA 3'

query 3' UUCUGAAGGGCAGCCUGGGUU 5'  
query=miR1146, target=R03G\_07303, score=0, range=464-484, strand=  
target 5' AAGACUUCCCGUCGGACCCAA 3'

query 3' UUCUGAAGGGCAGCCUGGGUU 5'  
query=miR1146, target=R03G\_14359, score=0, range=464-484, strand=  
target 5' AAGACUUCCCGUCGGACCCAA 3'

query 3' UUCUGAAGGGCAGCCUGGGUU 5'  
query=miR1146, target=R03G\_00681, score=0, range=464-484, strand=  
target 5' AAGACUUCCCGUCGGACCCAA 3'

query 3' UUCUGAAGGGCAGCCUGGGUU 5'  
query=miR1146, target=R03G\_05336, score=0, range=464-484, strand=  
target 5' AAGACUUCCCGUCGGACCCAA 3'

query 3' UUCUGAAGGGCAGCCUGGGUU 5'  
query=miR1146, target=R03G\_09544, score=0, range=464-484, strand=  
target 5' AAGACUUCCCGUCGGACCCAA 3'

query 3' UUCUGAAGGGCAGCCUGGGUU 5'  
query=miR1146, target=R03G\_10732, score=0, range=464-484, strand=  
target 5' AAGACUUCCCGUCGGACCCAA 3'

query 3' UUCUGAAGGGCAGCCUGGGUU 5'  
query=miR1146, target=R03G\_16807, score=0, range=464-484, strand=  
target 5' AAGACUUCCCGUCGGACCCAA 3'

query 3' UUCUGAAGGGCAGCCUGGGUU 5'  
query=miR1146, target=R03G\_17382, score=0, range=464-484, strand=  
target 5' AAGACUUCCCGUCGGACCCAA 3'  
.....  
query 3' UUCUGAAGGGCAGCCUGGGUU 5'  
query=miR1146, target=R03G\_02689, score=0, range=464-484, strand=  
target 5' AAGACUUCCCGUCGGACCCAA 3'  
.....  
query 3' UUCUGAAGGGCAGCCUGGGUU 5'  
query=miR1146, target=R03G\_01322, score=0, range=350-370, strand=  
target 5' AAGACUUCCCGUCGGACCCAA 3'  
.....  
query 3' UUCUGAAGGGCAGCCUGGGUU 5'  
query=miR1146, target=R03G\_17400, score=0, range=338-358, strand=  
target 5' AAGACUUCCCGUCGGACCCAA 3'  
.....  
query 3' UUCUGAAGGGCAGCCUGGGUU 5'  
query=miR1146, target=R03G\_05915, score=0, range=464-484, strand=  
target 5' AAGACUUCCCGUCGGACCCAA 3'  
.....  
query 3' UUCUGAAGGGCAGCCUGGGUU 5'  
query=miR1146, target=R03G\_01730, score=0, range=464-484, strand=  
target 5' AAGACUUCCCGUCGGACCCAA 3'  
.....  
query 3' UUCUGAAGGGCAGCCUGGGUU 5'  
query=miR1146, target=R03G\_13720, score=0, range=341-361, strand=  
target 5' AAGACUUCCCGUCGGACCCAA 3'  
.....  
query 3' UUCUGAAGGGCAGCCUGGGUU 5'  
query=miR1146, target=R03G\_16897, score=0, range=464-484, strand=  
target 5' AAGACUUCCCGUCGGACCCAA 3'  
.....  
query 3' UUCUGAAGGGCAGCCUGGGUU 5'  
query=miR1146, target=R03G\_17285, score=0.5, range=464-484, stran  
target 5' AAGGCUUCCCGUCGGACCCAA 3'  
.....  
query 3' UUCUGAAGGGCAGCCUGGGUU 5'  
query=miR1146, target=R03G\_01652, score=0.5, range=464-484, stran  
target 5' AAGACUUUCCGUCGGACCCAA 3'  
.....  
query 3' UUCUGAAGGGCAGCCUGGGUU 5'  
query=miR1146, target=R03G\_01956, score=0.5, range=464-484, stran  
target 5' AAGGCUUCCCGUCGGACCCAA 3'  
.....  
query 3' UUCUGAAGGGCAGCCUGGGUU 5'

query=miR1146, target=R03G\_08846, score=0.5, range=464-484, stran  
target 5' AAGACUUUCCGUCGGACCCAA 3'  
:::::::::::  
query 3' UUCUGAAGGGCAGCCUGGGUU 5'  
query=miR1146, target=R03G\_03571, score=0.5, range=464-484, stran  
target 5' AAGACUUUCCGUCGGACCCAA 3'  
:::::::::::  
query 3' UUCUGAAGGGCAGCCUGGGUU 5'  
query=miR1146, target=R03G\_05635, score=0.5, range=464-484, stran  
target 5' AAGACUUUCCGUCGGACCCAA 3'  
:::::::::::  
query 3' UUCUGAAGGGCAGCCUGGGUU 5'  
query=miR1146, target=R03G\_13848, score=0.5, range=464-484, stran  
target 5' AAGACUUUCCGUCGGACCCAA 3'  
:::::::::::  
query 3' UUCUGAAGGGCAGCCUGGGUU 5'  
query=miR1146, target=R03G\_09607, score=0.5, range=464-484, stran  
target 5' AAGACUUUCCGUCGGACCCAA 3'  
:::::::::::  
query 3' UUCUGAAGGGCAGCCUGGGUU 5'  
query=miR1146, target=R03G\_05622, score=0.5, range=464-484, stran  
target 5' AAGACUUUCCGUCGGACCCAA 3'  
:::::::::::  
query 3' UUCUGAAGGGCAGCCUGGGUU 5'  
query=miR1146, target=R03G\_13742, score=0.5, range=464-484, stran  
target 5' AAGACUUUCCGUCGGACCCAA 3'  
:::::::::::  
query 3' UUCUGAAGGGCAGCCUGGGUU 5'  
query=miR1146, target=R03G\_07704, score=0.5, range=464-484, stran  
target 5' AAGACUUUCCGUCGGACCCAA 3'  
:::::::::::  
query 3' UUCUGAAGGGCAGCCUGGGUU 5'  
query=miR1146, target=R03G\_13151, score=1, range=464-484, strand=  
target 5' AAGACUUCUGUCGGACCCAA 3'  
:::::::::::  
query 3' UUCUGAAGGGCAGCCUGGGUU 5'  
query=miR1146, target=R03G\_11773, score=1, range=464-484, strand=  
target 5' AAGAUUUCCGUCGGACCCAA 3'  
:::::::::::  
query 3' UUCUGAAGGGCAGCCUGGGUU 5'  
query=miR1146, target=R03G\_16551, score=1, range=464-484, strand=  
target 5' AAGAUUUCCGUCGGACCCAA 3'  
:::::::::::  
query 3' UUCUGAAGGGCAGCCUGGGUU 5'  
query=miR1146, target=R03G\_16555, score=1, range=464-484, strand=



target 5' AAGAUUUUCCGUCGGACCCAA 3'  
.....  
query 3' UUCUGAAGGGCAGCCUGGGUU 5'  
query=miR1146, target=R03G\_03615, score=1, range=464-484, strand=  
target 5' AAGUCUUCCCGUCGGACCCAA 3'  
::: .....  
query 3' UUCUGAAGGGCAGCCUGGGUU 5'  
query=miR1146, target=R03G\_13726, score=1.5, range=464-484, stran  
target 5' UAGACUUUCCGUCGGACCCAA 3'  
.....  
query 3' UUCUGAAGGGCAGCCUGGGUU 5'  
query=miR1146, target=R03G\_08661, score=2, range=464-484, strand=  
target 5' AAGGCUUUUCGUCGGACCCAA 3'  
.....  
query 3' UUCUGAAGGGCAGCCUGGGUU 5'  
query=miR1146, target=R03G\_05699, score=4, range=81-101, strand=1  
target 5' AAGACUUGUUGUUGGACCCAA 3'  
.....  
query 3' UUCUGAAGGGCAGCCUGGGUU 5'  
query=miR4414b, target=R03G\_17150, score=2, range=1385-1405, stra  
target 5' ACUGGCUCUCGCAUAUUCACA 3'  
.....  
query 3' GAACCGAGAGCGUAUAAGUGU 5'  
query=miR4414b, target=R03G\_11767, score=2, range=539-559, strand  
target 5' ACUGGCUCUCGCAUAUUCACA 3'  
.....  
query 3' GAACCGAGAGCGUAUAAGUGU 5'  
query=miR5219, target=R03G\_04102, score=0, range=292-313, strand=  
target 5' ACGCAGCAGCUGAGAGUCCAGA 3'  
.....  
query 3' UGCGUCGUCGACUCUCAGGUCU 5'  
query=miR5219, target=R03G\_17126, score=0, range=320-341, strand=  
target 5' ACGCAGCAGCUGAGAGUCCAGA 3'  
.....  
query 3' UGCGUCGUCGACUCUCAGGUCU 5'  
query=miR5219, target=R03G\_09090, score=0, range=290-311, strand=  
target 5' ACGCAGCAGCUGAGAGUCCAGA 3'  
.....  
query 3' UGCGUCGUCGACUCUCAGGUCU 5'  
query=miR5219, target=R03G\_07568, score=0, range=193-214, strand=  
target 5' ACGCAGCAGCUGAGAGUCCAGA 3'  
.....  
query 3' UGCGUCGUCGACUCUCAGGUCU 5'  
query=miR5219, target=R03G\_02387, score=0.5, range=235-256, stran  
target 5' AUGCAGCAGCUGAGAGUCCAGA 3'

.....  
query 3' UGCGUCGUCGACUCUCAGGUCU 5'  
query=miR5219, target=R03G\_15231, score=1, range=533-554, strand=  
target 5' ACACAGCAGCUGAGAGUCCAGA 3'  
:: .....

query 3' UGCGUCGUCGACUCUCAGGUCU 5'  
query=miR5219, target=R03G\_10585, score=1, range=134-155, strand=  
target 5' ACACAGCAGCUGAGAGUCCAGA 3'  
:: .....

query 3' UGCGUCGUCGACUCUCAGGUCU 5'  
query=miR5219, target=R03G\_08723, score=1, range=197-218, strand=  
target 5' ACGCAGCAGCUGAGAGUCCGGA 3'  
.....

query 3' UGCGUCGUCGACUCUCAGGUCU 5'  
query=miR5219, target=R03G\_08544, score=1.5, range=139-160, stran  
target 5' ACGUAUCAGCUGAGAGUCCAGA 3'  
.....

query 3' UGCGUCGUCGACUCUCAGGUCU 5'  
query=miR5219, target=R03G\_10900, score=2, range=89-110, strand=1  
target 5' ACGCAGCAGCUGAGAAUCCAGA 3'  
.....

query 3' UGCGUCGUCGACUCUCAGGUCU 5'  
query=miR5219, target=R03G\_12762, score=2, range=290-311, strand=  
target 5' ACGCAGCAGCUGAGAGUCGAGA 3'  
.....

query 3' UGCGUCGUCGACUCUCAGGUCU 5'  
query=miR5219, target=R03G\_10892, score=2, range=131-152, strand=  
target 5' ACGCAGCAGCUGAGAAUCCAGA 3'  
.....

query 3' UGCGUCGUCGACUCUCAGGUCU 5'  
query=miR5219, target=R03G\_09875, score=2, range=193-214, strand=  
target 5' ACACAGCAGUUGAGAGUCCAGA 3'  
:: .....

query 3' UGCGUCGUCGACUCUCAGGUCU 5'  
query=miR5219, target=R03G\_03449, score=2, range=116-137, strand=  
target 5' GCACAGCAGCUGAGAGUCCAGG 3'  
.: .....

query 3' UGCGUCGUCGACUCUCAGGUCU 5'  
query=miR5219, target=R03G\_06453, score=2.5, range=136-157, stran  
target 5' ACAUAGCAGCUGAGGGUCCAGA 3'  
:: .....

query 3' UGCGUCGUCGACUCUCAGGUCU 5'  
query=miR5219, target=R03G\_01907, score=3.5, range=103-124, stran  
target 5' GCAUAGUAGCUGAGAGUUCAGA 3'  
.: .....

query 3' UGCGUCGUCGACUCUCAGGUCU 5'  
query=miR8762d, target=R03G\_10771, score=3, range=484-505, strand  
target 5' AAACAUCGAUCAAAGUUCACAA 3'  
: :::::::::::::::::::: ::::

query 3' UCUGUAGCUAGUUUCAA AUGUU 5'  
query=miR8762d, target=R03G\_07739, score=3, range=484-505, strand  
target 5' AAACAUCGAUCAAAGUUCACAA 3'  
: :::::::::::::::::::: ::::

query 3' UCUGUAGCUAGUUUCAA AUGUU 5'  
query=miR8762d, target=R03G\_13852, score=3, range=484-505, strand  
target 5' AAACAUCGAUCAAAGUUCACAA 3'  
: :::::::::::::::::::: ::::

query 3' UCUGUAGCUAGUUUCAA AUGUU 5'  
query=miR8762d, target=R03G\_05953, score=4, range=733-754, strand  
target 5' AACACCGAUCAAAGUCUACAA 3'  
: ::: :::::::::::::::::::: ::::

query 3' UCUGUAGCUAGUUUCAA AUGUU 5'  
query=miR8762d, target=R03G\_17449, score=4, range=733-754, strand  
target 5' AACACCGAUCAAAGUCUACAA 3'  
: ::: :::::::::::::::::::: ::::

query 3' UCUGUAGCUAGUUUCAA AUGUU 5'  
query=miR8762d, target=R03G\_05921, score=4, range=733-754, strand  
target 5' AACACCGAUCAAAGUCUACAA 3'  
: ::: :::::::::::::::::::: ::::

query 3' UCUGUAGCUAGUUUCAA AUGUU 5'  
query=miR8762d, target=R03G\_10729, score=4, range=733-754, strand  
target 5' AACACCGAUCAAAGUCUACAA 3'  
: ::: :::::::::::::::::::: ::::

query 3' UCUGUAGCUAGUUUCAA AUGUU 5'  
query=miR8762d, target=R03G\_11966, score=4, range=733-754, strand  
target 5' AACACCGAUCAAAGUCUACAA 3'  
: ::: :::::::::::::::::::: ::::

query 3' UCUGUAGCUAGUUUCAA AUGUU 5'  
query=miR8762d, target=R03G\_05939, score=4, range=733-754, strand  
target 5' AACACCGAUCAAAGUCUACAA 3'  
: ::: :::::::::::::::::::: ::::

query 3' UCUGUAGCUAGUUUCAA AUGUU 5'  
query=miR1216, target=R03G\_14801, score=0, range=97-116, strand=1  
target 5' GUACAAGCGCUAACCCAUCA 3'  
: :::::::::::::::::::: ::::

query 3' CAUGUUCGCGAUUGGGUAGU 5'  
query=miR1216, target=R03G\_14788, score=0, range=97-116, strand=1  
target 5' GUACAAGCGCUAACCCAUCA 3'  
: :::::::::::::::::::: ::::

query 3' CAUGUUCGCGAUUGGGUAGU 5'

query=miR1216, target=R03G\_17261, score=0, range=164-183, strand=  
target 5' GUACAAGCGCUAACCCAUCA 3'  
::: :::  
query 3' CAUGUUCGCGAUUGGGUAGU 5'  
query=miR1216, target=R03G\_09190, score=0, range=164-183, strand=  
target 5' GUACAAGCGCUAACCCAUCA 3'  
::: :::  
query 3' CAUGUUCGCGAUUGGGUAGU 5'  
query=miR1216, target=R03G\_09181, score=0, range=164-183, strand=  
target 5' GUACAAGCGCUAACCCAUCA 3'  
::: :::  
query 3' CAUGUUCGCGAUUGGGUAGU 5'  
query=miR1216, target=R03G\_16732, score=0, range=164-183, strand=  
target 5' GUACAAGCGCUAACCCAUCA 3'  
::: :::  
query 3' CAUGUUCGCGAUUGGGUAGU 5'  
query=miR1216, target=R03G\_14792, score=0, range=164-183, strand=  
target 5' GUACAAGCGCUAACCCAUCA 3'  
::: :::  
query 3' CAUGUUCGCGAUUGGGUAGU 5'  
query=miR1216, target=R03G\_14799, score=0, range=164-183, strand=  
target 5' GUACAAGCGCUAACCCAUCA 3'  
::: :::  
query 3' CAUGUUCGCGAUUGGGUAGU 5'  
query=miR1216, target=R03G\_16813, score=0, range=164-183, strand=  
target 5' GUACAAGCGCUAACCCAUCA 3'  
::: :::  
query 3' CAUGUUCGCGAUUGGGUAGU 5'  
query=miR1216, target=R03G\_09818, score=4, range=432-452, strand=  
target 5' GUACGAGUGGCUAACCUAUCA 3'  
::: :::  
query 3' CAUGUUCG-CGAUUGGGUAGU 5'  
query=miR1216, target=R03G\_13574, score=4, range=219-237, strand=  
target 5' GUAAAAGCGC-AACUCAUCA 3'  
::: :::  
query 3' CAUGUUCGCGAUUGGGUAGU 5'  
query=miR2612, target=R03G\_13221, score=0, range=767-787, strand=  
target 5' CUGAUACUACUGCCACUAUCA 3'  
::: :::  
query 3' GACUAUGAUGACGGUGAUAGU 5'  
query=miR2612, target=R03G\_04123, score=1, range=767-787, strand=  
target 5' CUGAUACCACUGCCACUAUCA 3'  
::: :::  
query 3' GACUAUGAUGACGGUGAUAGU 5'  
query=miR2612, target=R03G\_04120, score=1, range=767-787, strand=

```

target 5' CUGAUACCACUGCCACUAUCA 3'
:~::~: ~::~:
query 3' GACUAUGAUGACGGUGAUAGU 5'
query=miR2612, target=R03G_13224, score=1, range=767-787, strand=
target 5' CUGAUACCACUGCCACUAUCA 3'
:~::~: ~::~:
query 3' GACUAUGAUGACGGUGAUAGU 5'
query=miR2612, target=R03G_17093, score=1, range=527-547, strand=
target 5' CUGAUACCACUGCCACUAUCA 3'
:~::~: ~::~:
query 3' GACUAUGAUGACGGUGAUAGU 5'
query=miR2612, target=R03G_11597, score=2.5, range=895-916, stran
target 5' UUGAUCACUACUGCCAUAUCA 3'
.:~::~: ~::~:
query 3' GACUA-UGAUGACGGUGAUAGU 5'
query=miR2612, target=R03G_01516, score=3, range=2025-2045, stran
target 5' UUGAUGCUGCUGCUACUAUCA 3'
.:~::~: ~::~:
query 3' GACUAUGAUGACGGUGAUAGU 5'
query=miR2612, target=R03G_02911, score=3.5, range=113-133, stran
target 5' CUGAUGAUACUGCUGCUAUCA 3'
.:~::~: ~::~:
query 3' GACUAUGAUGACGGUGAUAGU 5'
query=miR2612, target=R03G_03005, score=3.5, range=107-127, stran
target 5' UUGUUAUUACUGCCACUAUUG 3'
.:~::~: ~::~:
query 3' GACUAUGAUGACGGUGAUAGU 5'
query=miR2612, target=R03G_08542, score=3.5, range=237-256, stran
target 5' CUG-UGC UACUCCACUAUCA 3'
.:~::~: ~::~:
query 3' GACUAUGAUGACGGUGAUAGU 5'
query=miR2612, target=R03G_02624, score=3.5, range=315-334, stran
target 5' UUGAUAC-ACUGCCGUUAUCA 3'
.:~::~: ~::~:
query 3' GACUAUGAUGACGGUGAUAGU 5'
query=miR2612, target=R03G_08172, score=4, range=605-625, strand=
target 5' AUGAUACUAUUGCUGCUAUCA 3'
.:~::~: ~::~:
query 3' GACUAUGAUGACGGUGAUAGU 5'
query=miR2612, target=R03G_02915, score=4, range=901-922, strand=
target 5' GUGAUAACUACUGCCAUAUGUCA 3'
.:~::~: ~::~:
query 3' GACUA-UGAUGACGGUGAUAGU 5'
query=miR2612, target=R03G_01852, score=4, range=164-183, strand=
target 5' CUGCUACUACUGCUACU-UCA 3'

```

```

::: ::::::::::::::: :::
query 3' GACUAUGAUGACGGUGAUAGU 5'
query=miR2612, target=R03G_04617, score=4, range=675-694, strand=
target 5' CUUUUACUACUGCCAC-AUCA 3'
:: ::::::::::::::: :::
query 3' GACUAUGAUGACGGUGAUAGU 5'
query=miR1148.2, target=R03G_17296, score=2, range=120-140, stran
target 5' CCCGGCACCGGCGGAUCUCCA 3'
::::::::: :::::::::::::::
query 3' GGGCCGUGUCCGCCUAGAGGU 5'
query=miR6476a, target=R03G_03666, score=4, range=110-128, strand
target 5' UCAU-UUCAUUACUUGCCGA 3'
::::: :::::::::::::::
query 3' AGUACAAGUAGUGGAUGGCU 5'
query=miR6476a, target=R03G_04527, score=4, range=780-799, strand
target 5' UGAUGAUCAUCAUCUACUGA 3'
: ::: :::::::::::::::
query 3' AGUACAAGUAGUGGAUGGCU 5'
query=miR6476a, target=R03G_05448, score=4, range=1076-1094, stra
target 5' UCAUGGUCAUCACCU-CUGA 3'
::::: ::::::::::::::: :::
query 3' AGUACAAGUAGUGGAUGGCU 5'
query=miR6476a, target=R03G_10979, score=4, range=962-980, strand
target 5' UCAAG-GCAUCACCUACUGA 3'
::: : :::::::::::::::
query 3' AGUACAAGUAGUGGAUGGCU 5'
query=miR6476a, target=R03G_00932, score=4, range=124-142, strand
target 5' UCGUG-UCAUCAUCUACUGG 3'
::::: :::::::::::::::
query 3' AGUACAAGUAGUGGAUGGCU 5'
query=miR3949, target=R03G_16083, score=4, range=660-682, strand=
target 5' UGACAUUUUUUGCUUGUACCUCA 3'
. :::::::::::::::
query 3' GAUGUGAAAAACGAGUAUGGAGU 5'
query=miR5021, target=R03G_00301, score=0, range=2541-2560, stran
target 5' UUUUCCUUCUUCUAUCGUCA 3'
::::::::: :::::::::::::::
query 3' AAAAGGAAGAAGAUAGCAGU 5'
query=miR5021, target=R03G_04050, score=0, range=1257-1276, stran
target 5' UUUUCCUUCUUCUAUCGUCA 3'
::::::::: :::::::::::::::
query 3' AAAAGGAAGAAGAUAGCAGU 5'
query=miR5021, target=R03G_12949, score=0, range=702-721, strand=
target 5' UUUUCCUUCUUCUAUCGUCA 3'
::::::::: :::::::::::::::

```



query 3' AAAAGGAAGAAGAUAGCAGU 5'  
query=miR5021, target=R03G\_13112, score=3.5, range=1851-1869,  
strand=-1  
target 5' UUCUUCUUCUUCUA-CGUCA 3'  
:: :.:.:.:.:.:.:.:.:.:.: :.:.:.:.:.:.:.:.:.:.:  
query 3' AAAAGGAAGAAGAUAGCAGU 5'  
query=miR5021, target=R03G\_10608, score=3.5, range=9639-9659,  
strand=-1  
target 5' AUUUCUUCUUCUUCUAUCGUCA 3'  
:.:.:.:.:.:.:.:.:.:.: :.:.:.:.:.:.:.:.:.:.:  
query 3' AAAAGGAAGAAG-AUAGCAGU 5'  
query=miR5021, target=R03G\_06189, score=3.5, range=87-105, strand  
target 5' UUGUUCUUCUUC-AUCGUCA 3'  
:: :.:.:.:.:.:.:.:.:.:.: :.:.:.:.:.:.:.:.:.:.:  
query 3' AAAAGGAAGAAGAUAGCAGU 5'  
query=miR5021, target=R03G\_10250, score=4, range=237-256, strand=  
target 5' UUUUCCUUCUUCCAUAGUCA 3'  
:.:.:.:.:.:.:.:.:.:.: :.:.:.:.:.:.:.:.:.:.:  
query 3' AAAAGGAAGAAGAUAGCAGU 5'  
query=miR5021, target=R03G\_03019, score=4, range=209-228, strand=  
target 5' AUUUUUUUCUUCUGUUGUCA 3'  
:.:.:.:.:.:.:.:.:.:.: :.:.:.:.:.:.:.:.:.:.:  
query 3' AAAAGGAAGAAGAUAGCAGU 5'  
query=miR5021, target=R03G\_12821, score=4, range=812-831, strand=  
target 5' UCUUACUUUUUCUGUCGUCA 3'  
: :.:.:.:.:.:.:.:.:.: :.:.:.:.:.:.:.:.:.:.:  
query 3' AAAAGGAAGAAGAUAGCAGU 5'  
query=miR5021, target=R03G\_09002, score=4, range=881-900, strand=  
target 5' AUUACCUUCUUCAAUCGUCA 3'  
:: :.:.:.:.:.:.:.:.:.:.: :.:.:.:.:.:.:.:.:.:.:  
query 3' AAAAGGAAGAAGAUAGCAGU 5'  
query=miR5021, target=R03G\_13930, score=4, range=338-356, strand=  
target 5' UCUUCUUCUUCU-UAUCGUCG 3'  
: :.:.:.:.:.:.:.:.:.: :.:.:.:.:.:.:.:.:.:.:  
query 3' AAAAGGAAGAAGAUAGCAGU 5'  
query=miR5021, target=R03G\_07645, score=4, range=494-513, strand=  
target 5' CUUGACUUCUUCUAUCGUCU 3'  
:: :.:.:.:.:.:.:.:.:.:.: :.:.:.:.:.:.:.:.:.:.:  
query 3' AAAAGGAAGAAGAUAGCAGU 5'  
query=miR5021, target=R03G\_03189, score=4, range=365-385, strand=  
target 5' AAUUCACAUCUUCUAUCGUCA 3'  
:.:.:.:.:.:.:.:.:.:.: :.:.:.:.:.:.:.:.:.:.:  
query 3' AAAAG-GAAGAAGAUAGCAGU 5'  
query=miR5021, target=R03G\_09319, score=4, range=558-576, strand=  
target 5' UUCUACUUCUUCUAU-GUCA 3'



```
:: : ::::::::::: ::::
query 3' AAAAGGAAGAAGAUAGCAGU 5'
query=miR6025e, target=R03G_16742, score=0, range=601-622, strand
target 5' GCAUGUCAGAUCUAUAAUGGCA 3'
::::::::::::::::::::::::::
query 3' CGUACAGUCUAGAUUUUACCGU 5'
query=miR6025e, target=R03G_02824, score=0, range=601-622, strand
target 5' GCAUGUCAGAUCUAUAAUGGCA 3'
::::::::::::::::::::::::::
query 3' CGUACAGUCUAGAUUUUACCGU 5'
query=miR6025e, target=R03G_17416, score=0, range=601-622, strand
target 5' GCAUGUCAGAUCUAUAAUGGCA 3'
::::::::::::::::::::::::::
query 3' CGUACAGUCUAGAUUUUACCGU 5'
query=miR6025e, target=R03G_17291, score=0, range=601-622, strand
target 5' GCAUGUCAGAUCUAUAAUGGCA 3'
::::::::::::::::::::::::::
query 3' CGUACAGUCUAGAUUUUACCGU 5'
query=miR6025e, target=R03G_13714, score=0, range=601-622, strand
target 5' GCAUGUCAGAUCUAUAAUGGCA 3'
::::::::::::::::::::::::::
query 3' CGUACAGUCUAGAUUUUACCGU 5'
query=miR6025e, target=R03G_16372, score=0, range=601-622, strand
target 5' GCAUGUCAGAUCUAUAAUGGCA 3'
::::::::::::::::::::::::::
query 3' CGUACAGUCUAGAUUUUACCGU 5'
query=miR6025e, target=R03G_17355, score=0, range=436-457, strand
target 5' GCAUGUCAGAUCUAUAAUGGCA 3'
::::::::::::::::::::::::::
query 3' CGUACAGUCUAGAUUUUACCGU 5'
query=miR6025e, target=R03G_01962, score=0, range=352-373, strand
target 5' GCAUGUCAGAUCUAUAAUGGCA 3'
::::::::::::::::::::::::::
query 3' CGUACAGUCUAGAUUUUACCGU 5'
query=miR6025e, target=R03G_16706, score=0, range=325-346, strand
target 5' GCAUGUCAGAUCUAUAAUGGCA 3'
::::::::::::::::::::::::::
query 3' CGUACAGUCUAGAUUUUACCGU 5'
query=miR6025e, target=R03G_09193, score=0, range=325-346, strand
target 5' GCAUGUCAGAUCUAUAAUGGCA 3'
::::::::::::::::::::::::::
query 3' CGUACAGUCUAGAUUUUACCGU 5'
query=miR6025e, target=R03G_17223, score=0, range=325-346, strand
target 5' GCAUGUCAGAUCUAUAAUGGCA 3'
::::::::::::::::::::::::::
```

query 3' CGUACAGUCUAGAUUUACCGU 5'  
query=miR6025e, target=R03G\_04682, score=0, range=601-622, strand  
target 5' GCAUGUCAGAUCUAUAAUGGCA 3'  
.....  
query 3' CGUACAGUCUAGAUUUACCGU 5'  
query=miR6025e, target=R03G\_05640, score=1, range=496-517, strand  
target 5' GCAUGUCAGAUCUAUGAUGGCA 3'  
.....  
query 3' CGUACAGUCUAGAUUUACCGU 5'  
query=miR6025e, target=R03G\_07705, score=1, range=601-622, strand  
target 5' GCAUGUCAGAUCUAUAAUGGUA 3'  
.....  
query 3' CGUACAGUCUAGAUUUACCGU 5'  
query=miR6025e, target=R03G\_17387, score=1, range=601-622, strand  
target 5' GCAUGUCAGAUCUAUGAUGGCA 3'  
.....  
query 3' CGUACAGUCUAGAUUUACCGU 5'  
query=miR6025e, target=R03G\_16123, score=1, range=601-622, strand  
target 5' GCAUGUCAGAUCUAUGAUGGCA 3'  
.....  
query 3' CGUACAGUCUAGAUUUACCGU 5'  
query=miR6025e, target=R03G\_06717, score=1, range=601-622, strand  
target 5' GCAUGUCAGAUCUAUGAUGGCA 3'  
.....  
query 3' CGUACAGUCUAGAUUUACCGU 5'  
query=miR6025e, target=R03G\_07137, score=1, range=601-622, strand  
target 5' GCAUGUCAGAUCUAUGAUGGCA 3'  
.....  
query 3' CGUACAGUCUAGAUUUACCGU 5'  
query=miR6025e, target=R03G\_01328, score=1, range=601-622, strand  
target 5' GCAUGUCAGAUCUAUGAUGGCA 3'  
.....  
query 3' CGUACAGUCUAGAUUUACCGU 5'  
query=miR6025e, target=R03G\_05268, score=1, range=601-622, strand  
target 5' GCAUGUCAGAUCUAUGAUGGCA 3'  
.....  
query 3' CGUACAGUCUAGAUUUACCGU 5'  
query=miR6025e, target=R03G\_04674, score=1, range=352-373, strand  
target 5' GCAUGUCAGAUCUAUGAUGGCA 3'  
.....  
query 3' CGUACAGUCUAGAUUUACCGU 5'  
query=miR6025e, target=R03G\_14770, score=1, range=601-622, strand  
target 5' GCAUGUCAGAUCUAUAAUGGUA 3'  
.....  
query 3' CGUACAGUCUAGAUUUACCGU 5'

query=miR6025e, target=R03G\_11781, score=1, range=496-517, strand  
target 5' GCAUGUCAGAUCUAUAAUGGUA 3'  
:~::~  
query 3' CGUACAGUCUAGAUUUACCGU 5'  
query=miR6025e, target=R03G\_07702, score=1, range=352-373, strand  
target 5' GCAUGUCAGAUCUAUAAUGGUA 3'  
:~::~  
query 3' CGUACAGUCUAGAUUUACCGU 5'  
query=miR6025e, target=R03G\_16420, score=1, range=352-373, strand  
target 5' GCAUGUCAGAUCUAUAAUGGUA 3'  
:~::~  
query 3' CGUACAGUCUAGAUUUACCGU 5'  
query=miR6025e, target=R03G\_15282, score=1, range=325-346, strand  
target 5' GCAUGUCAGAUCUAUAAUGGUA 3'  
:~::~  
query 3' CGUACAGUCUAGAUUUACCGU 5'  
query=miR6025e, target=R03G\_15261, score=1, range=601-622, strand  
target 5' GCAUGUCAGAUCUAUGAUGGCA 3'  
:~::~  
query 3' CGUACAGUCUAGAUUUACCGU 5'  
query=miR6025e, target=R03G\_10795, score=1, range=601-622, strand  
target 5' GCAUGUCAGAUCUAUAAUGGUA 3'  
:~::~  
query 3' CGUACAGUCUAGAUUUACCGU 5'  
query=miR6025e, target=R03G\_17017, score=1, range=601-622, strand  
target 5' GCAUGUCAGAUCUAUAAUGGUA 3'  
:~::~  
query 3' CGUACAGUCUAGAUUUACCGU 5'  
query=miR6025e, target=R03G\_04695, score=1, range=391-412, strand  
target 5' GCAUGUCAGAUCUAUGAUGGCA 3'  
:~::~  
query 3' CGUACAGUCUAGAUUUACCGU 5'  
query=miR6025e, target=R03G\_07867, score=1, range=352-373, strand  
target 5' GCAUGUCAGAUCUAUGAUGGCA 3'  
:~::~  
query 3' CGUACAGUCUAGAUUUACCGU 5'  
query=miR6025e, target=R03G\_11235, score=1, range=496-517, strand  
target 5' GCAUGUCAGAUCUAUAAUGGUA 3'  
:~::~  
query 3' CGUACAGUCUAGAUUUACCGU 5'  
query=miR6025e, target=R03G\_06735, score=1, range=325-346, strand  
target 5' GCAUGUCAGAUCUAUAAUGGUA 3'  
:~::~  
query 3' CGUACAGUCUAGAUUUACCGU 5'  
query=miR6025e, target=R03G\_14555, score=1, range=229-250, strand

```
target 5' GCAUGUCAGAUCUAUAAUGGUA 3'
:
query 3' CGUACAGUCUAGAUUUUACCGU 5'
query=miR6025e, target=R03G_06417, score=1, range=229-250, strand
target 5' GCAUGUCAGAUCUAUAAUGGUA 3'
:
query 3' CGUACAGUCUAGAUUUUACCGU 5'
query=miR6025e, target=R03G_14786, score=1, range=229-250, strand
target 5' GCAUGUCAGAUCUAUAAUGGUA 3'
:
query 3' CGUACAGUCUAGAUUUUACCGU 5'
query=miR6025e, target=R03G_15271, score=2, range=601-622, strand
target 5' GCAUGUCAGAUCUAUGAUGGUA 3'
:
query 3' CGUACAGUCUAGAUUUUACCGU 5'
query=miR6025e, target=R03G_07739, score=2, range=352-373, strand
target 5' GCAUGUCAGAUCUAUGAUGGUA 3'
:
query 3' CGUACAGUCUAGAUUUUACCGU 5'
query=miR6025e, target=R03G_16725, score=2, range=343-364, strand
target 5' GCAUGUCAGAUCUAUGAUGGUA 3'
:
query 3' CGUACAGUCUAGAUUUUACCGU 5'
query=miR6025e, target=R03G_06433, score=2, range=325-346, strand
target 5' GCAUGUCAGAUUUUAUAAUGGUA 3'
:
query 3' CGUACAGUCUAGAUUUUACCGU 5'
query=miR6025e, target=R03G_10779, score=2, range=217-238, strand
target 5' GCAUGUCAGAUUUUAUAAUGGUA 3'
:
query 3' CGUACAGUCUAGAUUUUACCGU 5'
query=miR6025e, target=R03G_17277, score=2, range=85-106, strand=
target 5' GCAUGUCAGAUUUUAUAAUGGUA 3'
:
query 3' CGUACAGUCUAGAUUUUACCGU 5'
query=miR6025e, target=R03G_05632, score=2, range=286-307, strand
target 5' GCAUGUCAGAUCUAUAAUGGGA 3'
:
query 3' CGUACAGUCUAGAUUUUACCGU 5'
query=miR6025e, target=R03G_03591, score=2.5, range=217-238, stra
target 5' GCAUGUCGGAUUUAUAAUGGUA 3'
:
query 3' CGUACAGUCUAGAUUUUACCGU 5'
query=miR6025e, target=R03G_10771, score=3, range=352-373, strand
target 5' ACAUGUCAGAUCUAUGAUGGUA 3'
```

query 3' CGUACAGUCUAGAUUUUACCGU 5'  
query=miR6025e, target=R03G\_13852, score=3, range=352-373, strand  
target 5' ACAUGUCAGAUCUAUGAUGGUA 3'

query 3' CGUACAGUCUAGAUUUUACCGU 5'  
query=miR6025e, target=R03G\_04207, score=3, range=601-622, strand  
target 5' GCAUGUCAGAUUAUGAUGGCA 3'

query 3' CGUACAGUCUAGAUUUUACCGU 5'  
query=miR6025e, target=R03G\_17449, score=3, range=601-622, strand  
target 5' GCAUGUCAGAUUAUGAUGGCA 3'

query 3' CGUACAGUCUAGAUUUUACCGU 5'  
query=miR6025e, target=R03G\_05921, score=3, range=601-622, strand  
target 5' GCAUGUCAGAUUAUGAUGGCA 3'

query 3' CGUACAGUCUAGAUUUUACCGU 5'  
query=miR6025e, target=R03G\_14361, score=3, range=601-622, strand  
target 5' GCAUGUCAGAUUAUGAUGGCA 3'

query 3' CGUACAGUCUAGAUUUUACCGU 5'  
query=miR6025e, target=R03G\_01942, score=3, range=598-619, strand  
target 5' GCAUGUCAGAUUAUGAUGGCA 3'

query 3' CGUACAGUCUAGAUUUUACCGU 5'  
query=miR6025e, target=R03G\_17399, score=3, range=601-622, strand  
target 5' GCAUGUCAGAUCUAUGAUGACA 3'

query 3' CGUACAGUCUAGAUUUUACCGU 5'  
query=miR6025e, target=R03G\_05939, score=3, range=601-622, strand  
target 5' GCAUGUCAGAUGUAUGAUGGCA 3'

query 3' CGUACAGUCUAGAUUUUACCGU 5'  
query=miR6025e, target=R03G\_07124, score=3, range=601-622, strand  
target 5' GCAUGUCAGAUGUAUGAUGGCA 3'

query 3' CGUACAGUCUAGAUUUUACCGU 5'  
query=miR6025e, target=R03G\_09945, score=3, range=325-346, strand  
target 5' GCAUGUCAGAUUAUGAUGGCA 3'

query 3' CGUACAGUCUAGAUUUUACCGU 5'  
query=miR6025e, target=R03G\_11264, score=3, range=601-622, strand  
target 5' GCAUGUCAGAUUAUGAUGGCA 3'

query 3' CGUACAGUCUAGAUUUACCGU 5'  
query=miR6025e, target=R03G\_16689, score=3, range=601-622, strand  
target 5' GCAUGUCAGAUUAUGAUGGCA 3'  
.....: .....

query 3' CGUACAGUCUAGAUUUACCGU 5'  
query=miR6025e, target=R03G\_11962, score=3, range=325-346, strand  
target 5' GCAUGUCAGAUUCUCUAAUGGUA 3'  
.....: .....

query 3' CGUACAGUCUAGAUUUACCGU 5'  
query=miR6025e, target=R03G\_09542, score=4, range=601-622, strand  
target 5' GCAUGUCAGGUAUAUGAUGGCA 3'  
.....: .....

query 3' CGUACAGUCUAGAUUUACCGU 5'  
query=miR6025e, target=R03G\_04210, score=4, range=601-622, strand  
target 5' GCAUGUCAGGUGUAUGAUGGCA 3'  
.....: .....

query 3' CGUACAGUCUAGAUUUACCGU 5'  
query=miR6025e, target=R03G\_10773, score=4, range=601-622, strand  
target 5' GCAUGUCAGGUGUAUGAUGGCA 3'  
.....: .....

query 3' CGUACAGUCUAGAUUUACCGU 5'  
query=miR6025e, target=R03G\_10780, score=4, range=601-622, strand  
target 5' GCAUGUCAGGUGUAUGAUGGCA 3'  
.....: .....

query 3' CGUACAGUCUAGAUUUACCGU 5'  
query=miR6025e, target=R03G\_14568, score=4, range=601-622, strand  
target 5' GCAUGUCAGGUAUAUGAUGGCA 3'  
.....: .....

query 3' CGUACAGUCUAGAUUUACCGU 5'  
query=miR6025e, target=R03G\_10729, score=4, range=601-622, strand  
target 5' GCAUGUCAGGUAUAUGAUGGCA 3'  
.....: .....

query 3' CGUACAGUCUAGAUUUACCGU 5'  
query=miR6025e, target=R03G\_12663, score=4, range=436-457, strand  
target 5' GCAUGUCAGACUUAUGAUGGCA 3'  
.....: .....

query 3' CGUACAGUCUAGAUUUACCGU 5'  
query=miR6025e, target=R03G\_10798, score=4, range=601-622, strand  
target 5' GCAUGUCAGGUAUAUGAUGGCA 3'  
.....: .....

query 3' CGUACAGUCUAGAUUUACCGU 5'  
query=miR6025e, target=R03G\_17214, score=4, range=601-622, strand  
target 5' GCAUGUCAGGUGUAUGAUGGCA 3'  
.....: .....

query 3' CGUACAGUCUAGAUUUACCGU 5'

```

query=miR6025e, target=R03G_04117, score=4, range=496-517, strand
target 5' GCAUGUCAGACCUAUGAUGGUA 3'
: : : : : : : : : : : : : : : : : : : : : : :
query 3' CGUACAGUCUAGAUUUACCGU 5'
query=miR6025e, target=R03G_15866, score=4, range=325-346, strand
target 5' GCAUGUCAGGUGUAUGAUGGCA 3'
: : : : : : : : : : : : : : : : : : : : : : :
query 3' CGUACAGUCUAGAUUUACCGU 5'
query=miR6025e, target=R03G_05267, score=4, range=601-622, strand
target 5' GCCUGUCAGAUUAUGAUGGCA 3'
: : : : : : : : : : : : : : : : : : : : : : :
query 3' CGUACAGUCUAGAUUUACCGU 5'
query=miR6025e, target=R03G_09967, score=4, range=601-622, strand
target 5' GCCUGUCAGAUUAUGAUGGCA 3'
: : : : : : : : : : : : : : : : : : : : : : :
query 3' CGUACAGUCUAGAUUUACCGU 5'
query=miR6025e, target=R03G_07860, score=4, range=601-622, strand
target 5' GCCUGUCAGAUUAUGAUGGCA 3'
: : : : : : : : : : : : : : : : : : : : : : :
query 3' CGUACAGUCUAGAUUUACCGU 5'
query=miR6025e, target=R03G_00256, score=4, range=601-622, strand
target 5' GCCUGUCAGAUUAUGAUGGCA 3'
: : : : : : : : : : : : : : : : : : : : : : :
query 3' CGUACAGUCUAGAUUUACCGU 5'
query=miR6025e, target=R03G_05959, score=4, range=601-622, strand
target 5' GCCUGUCAGAUUAUGAUGGCA 3'
: : : : : : : : : : : : : : : : : : : : : : :
query 3' CGUACAGUCUAGAUUUACCGU 5'
query=miR6025e, target=R03G_09194, score=4, range=601-622, strand
target 5' GCCUGUCAGAUUAUGAUGGCA 3'
: : : : : : : : : : : : : : : : : : : : : : :
query 3' CGUACAGUCUAGAUUUACCGU 5'
query=miR6025e, target=R03G_11966, score=4, range=601-622, strand
target 5' GCCUGUCAGAUUAUGAUGGCA 3'
: : : : : : : : : : : : : : : : : : : : : : :
query 3' CGUACAGUCUAGAUUUACCGU 5'
query=miR6277, target=R03G_05710, score=3, range=1338-1356, stran
target 5' CUCUGUUUC-UUCACACACA 3'
: : : : : : : : : : : : : : : : : : : : : : :
query 3' GAGGCAGAGAAAGUGUGUGU 5'
query=miR6277, target=R03G_09135, score=4, range=2937-2956, stran
target 5' CAUUGGCUCUUUCACAUACA 3'
: : : : : : : : : : : : : : : : : : : : : : :
query 3' GAGGCAGAGAAAGUGUGUGU 5'
query=miR9553-3p, target=R03G_02695, score=0, range=3665-3686,

```

strand=1  
target 5' AUGUUCAUAGCUGGGAUGAUUA 3'  
::::::::::::::::::::::::::  
query 3' UACAAGUAUCGACCCUACUAAU 5'  
query=miR9553-3p, target=R03G\_09175, score=0, range=3665-3686,  
strand=1  
target 5' AUGUUCAUAGCUGGGAUGAUUA 3'  
::::::::::::::::::::::::::  
query 3' UACAAGUAUCGACCCUACUAAU 5'  
query=miR9553-3p, target=R03G\_03550, score=0, range=3665-3686,  
strand=1  
target 5' AUGUUCAUAGCUGGGAUGAUUA 3'  
::::::::::::::::::::::::::  
query 3' UACAAGUAUCGACCCUACUAAU 5'  
query=miR9553-3p, target=R03G\_11541, score=0, range=1055-1076,  
strand=1  
target 5' AUGUUCAUAGCUGGGAUGAUUA 3'  
::::::::::::::::::::::::::  
query 3' UACAAGUAUCGACCCUACUAAU 5'  
query=miR9553-3p, target=R03G\_00959, score=3.5, range=36-56, str  
target 5' GUGUUUGU-GUUGGGAUGAUUA 3'  
.:::::..: ::::::::::::::::::::  
query 3' UACAAGUAUCGACCCUACUAAU 5'  
query=miR2868, target=R03G\_14217, score=0, range=599-618, strand=  
target 5' UGCUACUACAACAAAUCAA 3'  
::::::::::::::::::::::::::  
query 3' ACGAUGAUGUUGUUUUUAGUU 5'  
query=miR2868, target=R03G\_13590, score=0, range=599-618, strand=  
target 5' UGCUACUACAACAAAUCAA 3'  
::::::::::::::::::::::::::  
query 3' ACGAUGAUGUUGUUUUUAGUU 5'  
query=miR2868, target=R03G\_04048, score=0.5, range=1508-1527, str  
target 5' UGCUACUACAACAAAUCAA 3'  
::::::::::::::::::::::::::  
query 3' ACGAUGAUGUUGUUUUUAGUU 5'  
query=miR2868, target=R03G\_03617, score=0.5, range=1568-1587, str  
target 5' UGCUACUACAACAAAUCAA 3'  
::::::::::::::::::::::::::  
query 3' ACGAUGAUGUUGUUUUUAGUU 5'  
query=miR2868, target=R03G\_11515, score=0.5, range=332-351, stran  
target 5' UGCUACUACAACAAAUCAG 3'  
::::::::::::::::::::::::::  
query 3' ACGAUGAUGUUGUUUUUAGUU 5'  
query=miR2868, target=R03G\_03026, score=2.5, range=19-37, strand=  
target 5' UCUUA-UACAACAAAUCAA 3'



```

: .:: :::::::::::::::
query 3' ACGAUGAUGUUGUUUUAGUU 5'
query=miR2868, target=R03G_01909, score=3, range=795-814, strand=
target 5' AGCUGCUACAGCAAAAUCAG 3'
::::::::::::::::::.
query 3' ACGAUGAUGUUGUUUUAGUU 5'
query=miR2868, target=R03G_03130, score=3, range=909-928, strand=
target 5' UGCUUCUACAAUGAAAUCAA 3'
:::: :::::::::::::::
query 3' ACGAUGAUGUUGUUUUAGUU 5'
query=miR2868, target=R03G_11701, score=3, range=1224-1242, stran
target 5' UGCUACUGCAACAAAA-CAA 3'
:::::::::::::::::: :::
query 3' ACGAUGAUGUUGUUUUAGUU 5'
query=miR2868, target=R03G_15707, score=3, range=2952-2970, stran
target 5' UGC-AGAACAACAAAUCAA 3'
::: : :::::::::::::::
query 3' ACGAUGAUGUUGUUUUAGUU 5'
query=miR2868, target=R03G_10856, score=3.5, range=641-660, stran
target 5' UGCUAUUACAGCAAAAUGAA 3'
:::::::::::::::::: ::
query 3' ACGAUGAUGUUGUUUUAGUU 5'
query=miR2868, target=R03G_00028, score=3.5, range=771-791, stran
target 5' UGCUUGC UACAACAAA AUCCA 3'
::: .: ::::::::::::::: :
query 3' ACG-AUGAUGUUGUUUUAGUU 5'
query=miR2868, target=R03G_01651, score=3.5, range=239-258, stran
target 5' AACUCUUACAACAAA AUCAA 3'
:: .: :::::::::::::::
query 3' ACGAUGAUGUUGUUUUAGUU 5'
query=miR2868, target=R03G_16465, score=3.5, range=2071-2090, str
target 5' AGUCUCUACAACAAA AUCAA 3'
:. :::::::::::::::
query 3' ACGAUGAUGUUGUUUUAGUU 5'
query=miR2868, target=R03G_08992, score=3.5, range=668-686, stran
target 5' UGC-AUUACAACAAA ACAA 3'
::: .: ::::::::::::::: :::
query 3' ACGAUGAUGUUGUUUUAGUU 5'
query=miR2868, target=R03G_08603, score=3.5, range=438-456, stran
target 5' UGC-AGUACAACGAAA UCAG 3'
::: : ::::::::::::::: .
query 3' ACGAUGAUGUUGUUUUAGUU 5'
query=miR2868, target=R03G_12444, score=3.5, range=498-518, stran
target 5' UGCAGCAGACAACAAA AUCAA 3'
::: .: :::::::::::::::

```

```

query 3' ACGAUG-AUGUUGUUUUAGUU 5'
query=miR2868, target=R03G_03905, score=3.5, range=1874-1892,
strand=-1
target 5' UG-UGCUACAACAAGAUCGA 3'
:: :::::::::::::::::::::
query 3' ACGAUGAUGUUGUUUUAGUU 5'
query=miR2868, target=R03G_11177, score=3.5, range=1073-1091,
strand=-1
target 5' UGC-AUUUAAUAAAAUCA 3'
::: :::::::::::::::::::::
query 3' ACGAUGAUGUUGUUUUAGUU 5'
query=miR2868, target=R03G_04878, score=3.5, range=1004-1023,
strand=-1
target 5' UUCUUUUACAGCAAAAUCA 3'
: :: :::::::::::::::::::::
query 3' ACGAUGAUGUUGUUUUAGUU 5'
query=miR2868, target=R03G_07279, score=4, range=3150-3169, stran
target 5' UGCUACUAUAACAGAAACA 3'
::::::::::::::::::: :::
query 3' ACGAUGAUGUUGUUUUAGUU 5'
query=miR2868, target=R03G_04479, score=4, range=530-549, strand=
target 5' UGUUUAUUACACCAGAAUCA 3'
::::::::::::: :::::::::::
query 3' ACGAUGAUGUUGUUUUAGUU 5'
query=miR2868, target=R03G_00451, score=4, range=279-298, strand=
target 5' AGCUACAACAAUAAGAUCA 3'
::::: :::::::::::::::::::::
query 3' ACGAUGAUGUUGUUUUAGUU 5'
query=miR2868, target=R03G_11324, score=4, range=132-151, strand=
target 5' UGCUGUUACAACAAAACCAC 3'
::::::::::::::::::: ::
query 3' ACGAUGAUGUUGUUUUAGUU 5'
query=miR2868, target=R03G_04175, score=4, range=3378-3397, stran
target 5' UGUUGCCACAACAGAAUCAU 3'
::::: :::::::::::::::::::::
query 3' ACGAUGAUGUUGUUUUAGUU 5'
query=miR2868, target=R03G_01836, score=4, range=803-822, strand=
target 5' UGUUGCAACAACAAGAUCAU 3'
::::: :::::::::::::::::::::
query 3' ACGAUGAUGUUGUUUUAGUU 5'
query=miR2868, target=R03G_08583, score=4, range=1788-1806, stran
target 5' UGUUUAUUACAG-AAAAUCA 3'
::::::::::::. :::::::::::
query 3' ACGAUGAUGUUGUUUUAGUU 5'
query=miR2868, target=R03G_00460, score=4, range=291-310, strand=

```

target 5' UCCUACUAAAACAAAGUCA 3'  
: : ::::: : : ::::: :  
query 3' ACGAUGAUGUUGUUUUAGUU 5'  
query=miR2868, target=R03G\_06532, score=4, range=650-669, strand=  
target 5' AGCAACUACAGCAAAAUCAU 3'  
: : : : ::::: : : : ::::: :  
query 3' ACGAUGAUGUUGUUUUAGUU 5'  
query=miR2868, target=R03G\_09230, score=4, range=195-214, strand=  
target 5' UACUACUACAACAAAAGCAC 3'  
: : : : ::::: : : : : : : : : : : :  
query 3' ACGAUGAUGUUGUUUUAGUU 5'  
query=miR2868, target=R03G\_00896, score=4, range=359-378, strand=  
target 5' AGAUAUGCAACAAAUCA 3'  
: : : : : : : : : : : : : : : : : : : : : : :  
query 3' ACGAUGAUGUUGUUUUAGUU 5'  
query=miR2868, target=R03G\_13441, score=4, range=375-394, strand=  
target 5' AGCUUAACAACAAAUCAG 3'  
: : : : : : : : : : : : : : : : : : : : : : :  
query 3' ACGAUGAUGUUGUUUUAGUU 5'  
query=miR2868, target=R03G\_14147, score=4, range=1136-1154, stran  
target 5' UG-UACAAUAAUAAAUCA 3'  
: : : : : : : : : : : : : : : : : : : : : : :  
query 3' ACGAUGAUGUUGUUUUAGUU 5'  
query=miR2868, target=R03G\_13385, score=4, range=92-111, strand=1  
target 5' AUCAACAACAACAAAUCA 3'  
: : : : : : : : : : : : : : : : : : : : : : :  
query 3' ACGAUGAUGUUGUUUUAGUU 5'  
query=miR2868, target=R03G\_04779, score=4, range=461-479, strand=  
target 5' CGC-AAUACAACAAAGUCA 3'  
: : : : : : : : : : : : : : : : : : : : : : :  
query 3' ACGAUGAUGUUGUUUUAGUU 5'  
query=miR2868, target=R03G\_08932, score=4, range=432-450, strand=  
target 5' CGUU-CAACAACAAAUCAG 3'  
: : : : : : : : : : : : : : : : : : : : : : :  
query 3' ACGAUGAUGUUGUUUUAGUU 5'  
query=miR2868, target=R03G\_03029, score=4, range=1583-1602, stran  
target 5' UUCAACAACAACAAAUCAC 3'  
: : : : : : : : : : : : : : : : : : : : : : :  
query 3' ACGAUGAUGUUGUUUUAGUU 5'  
query=miR2868, target=R03G\_03922, score=4, range=3036-3054, stran  
target 5' UGC-AGAGCAACAAAUCA 3'  
: : : : : : : : : : : : : : : : : : : : : : :  
query 3' ACGAUGAUGUUGUUUUAGUU 5'  
query=miR2868, target=R03G\_15451, score=4, range=1122-1140, stran  
target 5' UACUAC-ACAACGAAUCAC 3'

```

: ::: :~::~:~::~:
query 3' ACGAUGAUGUUGUUUUAGUU 5'
query=miR2868, target=R03G_02573, score=4, range=295-315, strand=
target 5' GGUUAUUUAUCAACAAAUCAA 3'
:~::~:~::~:~::~:
query 3' ACGAUGAU-GUUGUUUUAGUU 5'
query=miR2868, target=R03G_03208, score=4, range=18-36, strand=1
target 5' UGCAAC-ACAACAAAUUAU 3'
::: :: :~::~:~::~:
query 3' ACGAUGAUGUUGUUUUAGUU 5'
query=miR2868, target=R03G_07160, score=4, range=996-1014, strand
target 5' UGCUGUUA-GACAAAUCAA 3'
:~::~:~::~:~::~:
query 3' ACGAUGAUGUUGUUUUAGUU 5'
query=miR2868, target=R03G_08051, score=4, range=599-618, strand=
target 5' UGUUUUUACAACAAAUAAA 3'
:~::~:~::~:~::~:
query 3' ACGAUGAUGUUGUUUUAGUU 5'
query=miR2868, target=R03G_17116, score=4, range=230-249, strand=
target 5' AACUGGUACAACAAAUCAG 3'
:~::~:~::~:~::~:
query 3' ACGAUGAUGUUGUUUUAGUU 5'
query=miR2868, target=R03G_16533, score=4, range=284-304, strand=
target 5' GGUUGCAAACAACAAAUCAA 3'
:~::~:~::~:~::~:
query 3' ACGAUG-AUGUUGUUUUAGUU 5'
query=miR2868, target=R03G_03727, score=4, range=1259-1278, stran
target 5' UGCCUUGACAACAAAUCAG 3'
:~::~:~::~:~::~:
query 3' ACGAUGAUGUUGUUUUAGUU 5'
query=miR5639-5p, target=R03G_16544, score=0, range=563-582, stra
target 5' GCCUUAGACACGUGGAACAA 3'
:~::~:~::~:~::~:
query 3' CGGAAUCUGUGCACCUUGUU 5'
query=miR5639-5p, target=R03G_15468, score=4, range=1555-1574,
strand=1
target 5' GCCUUGGGCACAUGGAACAG 3'
:~::~:~::~:~::~:
query 3' CGGAAUCUGUGCACCUUGUU 5'
query=miR5639-5p, target=R03G_02557, score=4, range=368-388, stra
target 5' UCCUUAACAUCUGGAACAA 3'
:~::~:~::~:~::~:
query 3' CGGAA-UCUGUGCACCUUGUU 5'
query=miR2651, target=R03G_16804, score=0, range=159-178, strand=
target 5' AAUCAGCAUAUCAACA 3'

```

query 3' UUAGUCGUAUAGUUAGUUGU 5'  
query=miR2651, target=R03G\_13293, score=0, range=159-178, strand=  
target 5' AAUCAGCAUAUCAAUCAACA 3'

query 3' UUAGUCGUAUAGUUAGUUGU 5'  
query=miR2651, target=R03G\_03867, score=1, range=159-178, strand=  
target 5' AAUCAGCAUGUCAAUCAACA 3'

query 3' UUAGUCGUAUAGUUAGUUGU 5'  
query=miR2651, target=R03G\_01004, score=1, range=159-178, strand=  
target 5' AAUCAGCAUGUCAAUCAACA 3'

query 3' UUAGUCGUAUAGUUAGUUGU 5'  
query=miR2651, target=R03G\_15131, score=1, range=159-178, strand=  
target 5' AAUCAGCAUGUCAAUCAACA 3'

query 3' UUAGUCGUAUAGUUAGUUGU 5'  
query=miR2651, target=R03G\_01475, score=1, range=159-178, strand=  
target 5' AAUCAGCAUGUCAAUCAACA 3'

query 3' UUAGUCGUAUAGUUAGUUGU 5'  
query=miR2651, target=R03G\_13439, score=1, range=159-178, strand=  
target 5' AAUCAGCAUGUCAAUCAACA 3'

query 3' UUAGUCGUAUAGUUAGUUGU 5'  
query=miR2651, target=R03G\_15002, score=1, range=159-178, strand=  
target 5' AAUCAGCAUGUCAAUCAACA 3'

query 3' UUAGUCGUAUAGUUAGUUGU 5'  
query=miR2651, target=R03G\_09044, score=1, range=21-40, strand=1  
target 5' AAUCAGCAUGUCAAUCAACA 3'

query 3' UUAGUCGUAUAGUUAGUUGU 5'  
query=miR2651, target=R03G\_12536, score=1, range=159-178, strand=  
target 5' AAUCAGCAUGUCAAUCAACA 3'

query 3' UUAGUCGUAUAGUUAGUUGU 5'  
query=miR2651, target=R03G\_10715, score=1, range=159-178, strand=  
target 5' AAUCAGCAUGUCAAUCAACA 3'

query 3' UUAGUCGUAUAGUUAGUUGU 5'  
query=miR2651, target=R03G\_04309, score=1, range=159-178, strand=  
target 5' AAUCAGCAUGUCAAUCAACA 3'

```

query 3' UUAGUCGUAUAGUUAGUUGU 5'
query=miR2651, target=R03G_09718, score=1, range=159-178, strand=
target 5' AAUCAGCAUGUCAAUCAACA 3'
.....
query 3' UUAGUCGUAUAGUUAGUUGU 5'
query=miR2651, target=R03G_12007, score=1, range=159-178, strand=
target 5' AAUCAGCAUGUCAAUCAACA 3'
.....
query 3' UUAGUCGUAUAGUUAGUUGU 5'
query=miR2651, target=R03G_10177, score=1, range=159-178, strand=
target 5' AAUCAGCAUGUCAAUCAACA 3'
.....
query 3' UUAGUCGUAUAGUUAGUUGU 5'
query=miR2651, target=R03G_03524, score=2.5, range=1112-1131,
strand=-1
target 5' GAUCAGCGUGUCAAUCAACA 3'
.....
query 3' UUAGUCGUAUAGUUAGUUGU 5'
query=miR2651, target=R03G_11598, score=3, range=1072-1091, stran
target 5' CAUCAGCAUUUCAAUCAACA 3'
.....
query 3' UUAGUCGUAUAGUUAGUUGU 5'
query=miR2651, target=R03G_13050, score=3, range=2507-2526, stran
target 5' ACUCAGCAUCUCAAUCAACA 3'
: .....
query 3' UUAGUCGUAUAGUUAGUUGU 5'
query=miR2651, target=R03G_13112, score=4, range=1618-1637, stran
target 5' CGUCAGCGUAUCAAUCAAGCG 3'
.....
query 3' UUAGUCGUAUAGUUAGUUGU 5'
query=miR2651, target=R03G_12637, score=4, range=499-518, strand=
target 5' AAUUGGCGUAACAAUCAACA 3'
.....
query 3' UUAGUCGUAUAGUUAGUUGU 5'
query=miR2651, target=R03G_15178, score=4, range=1729-1748, stran
target 5' CGUCAACGUAUCAAUCAACG 3'
.::: .....
query 3' UUAGUCGUAUAGUUAGUUGU 5'
query=miR2651, target=R03G_07853, score=4, range=959-978, strand=
target 5' AAUCAUCAUAUAAAUCAUA 3'
:::: .....
query 3' UUAGUCGUAUAGUUAGUUGU 5'
query=miR2651, target=R03G_17129, score=4, range=2074-2093, stran
target 5' AAGCAGAAUGUCGAUCAACA 3'
:: :: .....

```

```
query 3' UUAGUCGUAUAGUUAGUUGU 5'
query=miR2651, target=R03G_08603, score=4, range=284-302, strand=
target 5' AAUUGG-AUAUCAAUCAAC 3'
.....: ..:
query 3' UUAGUCGUAUAGUUAGUUGU 5'
query=miR2651, target=R03G_10000, score=4, range=47-65, strand=1
target 5' GAUCA-UUAUCAAUUCGACU 3'
.....: ..:
query 3' UUAGUCGUAUAGUUAGUUGU 5'
query=miR2651, target=R03G_12971, score=4, range=1111-1130, stran
target 5' AACCAACAUAACAAUCAACA 3'
:: :: ::: ..:
query 3' UUAGUCGUAUAGUUAGUUGU 5'
query=miR2651, target=R03G_03799, score=4, range=1069-1088, stran
target 5' AACCAACAUAACAAUCAACA 3'
:: :: ::: ..:
query 3' UUAGUCGUAUAGUUAGUUGU 5'
query=miR2651, target=R03G_09489, score=4, range=1069-1088, stran
target 5' AACCAACAUAACAAUCAACA 3'
:: :: ::: ..:
query 3' UUAGUCGUAUAGUUAGUUGU 5'
query=miR2651, target=R03G_10225, score=4, range=1069-1088, stran
target 5' AACCAACAUAACAAUCAACA 3'
:: :: ::: ..:
query 3' UUAGUCGUAUAGUUAGUUGU 5'
query=miR2651, target=R03G_02696, score=4, range=553-572, strand=
target 5' AACCAACAUAACAAUCAACA 3'
:: :: ::: ..:
query 3' UUAGUCGUAUAGUUAGUUGU 5'
query=miR2651, target=R03G_03095, score=4, range=247-267, strand=
target 5' AAUCAACCAUAUCAACAACA 3'
:::: : ..:
query 3' UUAG-UCGUAUAGUUAGUUGU 5'
query=miR2651, target=R03G_07453, score=4, range=551-570, strand=
target 5' AAAAAGAAUAUCAAUUCGACA 3'
:: :: ..:
query 3' UUAGUCGUAUAGUUAGUUGU 5'
query=miR2651, target=R03G_16091, score=4, range=629-649, strand=
target 5' UAUUAGUGAUGUCAAUCAACA 3'
.....: ..:
query 3' UUAGUCG-UAUAGUUAGUUGU 5'
query=miR2651, target=R03G_00059, score=4, range=630-649, strand=
target 5' UUUCAGCAUAUAAAUCAACA 3'
.....: ..:
query 3' UUAGUCGUAUAGUUAGUUGU 5'
```





query=miR8011a-5p, target=R03G\_03547, score=0, range=5239-5261,  
strand=1  
target 5' GAAAAAAGAAAGCUCAACCCAA 3'  
:~::~  
query 3' CUUUUUUUCUUUCGAGUUGGGUU 5'  
query=miR8011a-5p, target=R03G\_02959, score=0, range=5079-5101,  
strand=1  
target 5' GAAAAAAGAAAGCUCAACCCAA 3'  
:~::~  
query 3' CUUUUUUUCUUUCGAGUUGGGUU 5'  
query=miR8011a-5p, target=R03G\_06427, score=0, range=4831-4853,  
strand=1  
target 5' GAAAAAAGAAAGCUCAACCCAA 3'  
:~::~  
query 3' CUUUUUUUCUUUCGAGUUGGGUU 5'  
query=miR8011a-5p, target=R03G\_06428, score=0, range=4333-4355,  
strand=1  
target 5' GAAAAAAGAAAGCUCAACCCAA 3'  
:~::~  
query 3' CUUUUUUUCUUUCGAGUUGGGUU 5'  
query=miR8011a-5p, target=R03G\_05619, score=0, range=3382-3404,  
strand=1  
target 5' GAAAAAAGAAAGCUCAACCCAA 3'  
:~::~  
query 3' CUUUUUUUCUUUCGAGUUGGGUU 5'  
query=miR8011a-5p, target=R03G\_17404, score=1, range=1716-1738,  
strand=1  
target 5' AAAAAAAGAAAGCUCAACCCAA 3'  
:~::~  
query 3' CUUUUUUUCUUUCGAGUUGGGUU 5'  
query=miR8011a-5p, target=R03G\_04115, score=2, range=2031-2053,  
strand=1  
target 5' AAAAAAAGAAAGCUCAAUCCAA 3'  
:~::~  
query 3' CUUUUUUUCUUUCGAGUUGGGUU 5'  
query=miR8011a-5p, target=R03G\_08253, score=3, range=345-367, str  
target 5' UAAAAAAGAAAGCUCAAUCCAC 3'  
:~::~  
query 3' CUUUUUUUCUUUCGAGUUGGGUU 5'  
query=miR8011a-5p, target=R03G\_16065, score=4, range=407-429,  
strand=-1  
target 5' GGAAAUAGAAAACUCAACCCAG 3'  
:~::~  
query 3' CUUUUUUUCUUUCGAGUUGGGUU 5'  
query=miR1152, target=R03G\_13297, score=0, range=719-738, strand=



```

::: :::::::::::::::
query 3' AAGUUCUGCGCGAGGAAAAU 5'
query=miR854, target=R03G_06418, score=0, range=381-401, strand=-
target 5' CCCUUCUCAAUUCCUCAUCA 3'
::::::::::::::::::
query 3' GGGAAGAGUUUAUAGGAGUAGU 5'
query=miR854, target=R03G_11879, score=2.5, range=2138-2158, stra
target 5' CACUUCUUAUAUCCUUAUCA 3'
: :::::::::::::::
query 3' GGGAAGAGUUUAUAGGAGUAGU 5'
query=miR854, target=R03G_10853, score=3, range=141-161, strand=-
target 5' CUCUUUUGAAUAUCUUCAUCA 3'
: :::::::::::::::
query 3' GGGAAGAGUUUAUAGGAGUAGU 5'
query=miR854, target=R03G_09011, score=3.5, range=3740-3760, stra
target 5' AUCUCGUCAAUAUCCUCAUCA 3'
.::: :::::::::::::::
query 3' GGGAAGAGUUUAUAGGAGUAGU 5'
query=miR854, target=R03G_12902, score=3.5, range=189-209, strand
target 5' CUCUUUUCACUAUCCUCAUCG 3'
: :::::::::::::::
query 3' GGGAAGAGUUUAUAGGAGUAGU 5'
query=miR854, target=R03G_06151, score=3.5, range=1314-1335, stra
target 5' CUCUUCUCCAUAUCCUCAUCA 3'
: :::::::::::::::
query 3' GGGAAG-AGUUUAUAGGAGUAGU 5'
query=miR854, target=R03G_04712, score=3.5, range=2535-2555, stra
target 5' UACUCUCAAUAUCCUCAUCG 3'
. ::: :::::::::::::::
query 3' GGGAAGAGUUUAUAGGAGUAGU 5'
query=miR854, target=R03G_05685, score=3.5, range=678-698, strand
target 5' UCCUCCUCAAUUCCUCCUCA 3'
.::: :::::::::::::::
query 3' GGGAAGAGUUUAUAGGAGUAGU 5'
query=miR854, target=R03G_06208, score=3.5, range=213-232, strand
target 5' UCUUUUCAAU-UCCUCAUCA 3'
.::: :::::::::::::::
query 3' GGGAAGAGUUUAUAGGAGUAGU 5'
query=miR854, target=R03G_10188, score=3.5, range=174-195, strand
target 5' CCCUUCUUUAUAUCCUUCAUCA 3'
: :::::::::::::::
query 3' GGGAAGAGUUUAUAGG-AGUAGU 5'
query=miR854, target=R03G_15519, score=3.5, range=453-473, strand
target 5' UCUUUAUAUAUCCUCAUCA 3'
.::: :::::::::::::::

```



query=miR3449-5p, target=R03G\_07690, score=0, range=365-383, str  
target 5' ACAGACGAAAGCGAUUGGA 3'  
::::::::::::::::::::  
query 3' UGUCUGCUUUCGCUAACCU 5'  
query=miR3449-5p, target=R03G\_03624, score=0, range=365-383, str  
target 5' ACAGACGAAAGCGAUUGGA 3'  
::::::::::::::::::::  
query 3' UGUCUGCUUUCGCUAACCU 5'  
query=miR3449-5p, target=R03G\_08847, score=0, range=365-383, str  
target 5' ACAGACGAAAGCGAUUGGA 3'  
::::::::::::::::::::  
query 3' UGUCUGCUUUCGCUAACCU 5'  
query=miR3449-5p, target=R03G\_02706, score=0, range=557-575, str  
target 5' ACAGACGAAAGCGAUUGGA 3'  
::::::::::::::::::::  
query 3' UGUCUGCUUUCGCUAACCU 5'  
query=miR3449-5p, target=R03G\_16550, score=0, range=476-494, str  
target 5' ACAGACGAAAGCGAUUGGA 3'  
::::::::::::::::::::  
query 3' UGUCUGCUUUCGCUAACCU 5'  
query=miR3449-5p, target=R03G\_13286, score=0, range=557-575, str  
target 5' ACAGACGAAAGCGAUUGGA 3'  
::::::::::::::::::::  
query 3' UGUCUGCUUUCGCUAACCU 5'  
query=miR3449-5p, target=R03G\_07707, score=0, range=557-575, str  
target 5' ACAGACGAAAGCGAUUGGA 3'  
::::::::::::::::::::  
query 3' UGUCUGCUUUCGCUAACCU 5'  
query=miR3449-5p, target=R03G\_00679, score=0, range=557-575, str  
target 5' ACAGACGAAAGCGAUUGGA 3'  
::::::::::::::::::::  
query 3' UGUCUGCUUUCGCUAACCU 5'  
query=miR3449-5p, target=R03G\_13919, score=0, range=557-575, str  
target 5' ACAGACGAAAGCGAUUGGA 3'  
::::::::::::::::::::  
query 3' UGUCUGCUUUCGCUAACCU 5'  
query=miR3449-5p, target=R03G\_13743, score=0, range=365-383, str  
target 5' ACAGACGAAAGCGAUUGGA 3'  
::::::::::::::::::::  
query 3' UGUCUGCUUUCGCUAACCU 5'  
query=miR3449-5p, target=R03G\_00284, score=0, range=374-392, str  
target 5' ACAGACGAAAGCGAUUGGA 3'  
::::::::::::::::::::  
query 3' UGUCUGCUUUCGCUAACCU 5'  
query=miR3449-5p, target=R03G\_10741, score=0, range=365-383, str

```
target 5' ACAGACGAAAGCGAUUGGA 3'
::::::::::::::::::
query 3' UGUCUGCUUUCGCUAACCU 5'
query=miR3449-5p, target=R03G_10763, score=0, range=365-383, str
target 5' ACAGACGAAAGCGAUUGGA 3'
::::::::::::::::::
query 3' UGUCUGCUUUCGCUAACCU 5'
query=miR3449-5p, target=R03G_17222, score=0, range=557-575, str
target 5' ACAGACGAAAGCGAUUGGA 3'
::::::::::::::::::
query 3' UGUCUGCUUUCGCUAACCU 5'
query=miR3449-5p, target=R03G_12678, score=0, range=557-575, str
target 5' ACAGACGAAAGCGAUUGGA 3'
::::::::::::::::::
query 3' UGUCUGCUUUCGCUAACCU 5'
query=miR3449-5p, target=R03G_00688, score=0, range=365-383, str
target 5' ACAGACGAAAGCGAUUGGA 3'
::::::::::::::::::
query 3' UGUCUGCUUUCGCUAACCU 5'
query=miR3449-5p, target=R03G_10787, score=0.5, range=365-383,
strand=1
target 5' ACAGACGAAAGCGAUUGGG 3'
::::::::::::::::::
query 3' UGUCUGCUUUCGCUAACCU 5'
query=miR3449-5p, target=R03G_12166, score=0.5, range=365-383,
strand=1
target 5' ACAGACGAAAGCGAUUGGG 3'
::::::::::::::::::
query 3' UGUCUGCUUUCGCUAACCU 5'
query=miR3449-5p, target=R03G_12658, score=0.5, range=365-383,
strand=1
target 5' ACAGACGAAAGCGAUUGGG 3'
::::::::::::::::::
query 3' UGUCUGCUUUCGCUAACCU 5'
query=miR3449-5p, target=R03G_03602, score=1, range=506-524, str
target 5' ACAUACGAAAGCGAUUGGA 3'
::: ::::::::::::::::::::
query 3' UGUCUGCUUUCGCUAACCU 5'
query=miR3449-5p, target=R03G_03588, score=1, range=242-260, str
target 5' ACAUACGAAAGCGAUUGGA 3'
::: ::::::::::::::::::::
query 3' UGUCUGCUUUCGCUAACCU 5'
query=miR3449-5p, target=R03G_01960, score=1, range=557-575, str
target 5' ACAUACGAAAGCGAUUGGA 3'
::: ::::::::::::::::::::
```



strand=1  
target 5' ACA-ACCAAAGCGAUUGGG 3'  
::: :: :::::::::::::::  
query 3' UGUCUGCUUUUCGCUAACCU 5'  
query=miR3449-5p, target=R03G\_16413, score=3.5, range=944-962,  
strand=1  
target 5' AGGAAAGAAAGCGAUUGGA 3'  
: . : :::::::::::::::  
query 3' UGUCUGCUUUUCGCUAACCU 5'  
query=miR3449-5p, target=R03G\_01501, score=3.5, range=1054-1071,  
strand=1  
target 5' UCAGAUGAAAGC-AUUGGA 3'  
::::: :::::::::::::::  
query 3' UGUCUGCUUUUCGCUAACCU 5'  
query=miR3449-5p, target=R03G\_00586, score=3.5, range=423-441,  
strand=-1  
target 5' ACUGAUGAUAGCGAUUGGA 3'  
:: ::::: :::::::::::::::  
query 3' UGUCUGCUUUUCGCUAACCU 5'  
query=miR3449-5p, target=R03G\_15766, score=3.5, range=815-833,  
strand=-1  
target 5' GAAGAAGAAAGCGAUUGGU 3'  
. ::: :::::::::::::::  
query 3' UGUCUGCUUUUCGCUAACCU 5'  
query=miR3449-5p, target=R03G\_08529, score=4, range=775-793, stra  
target 5' ACGGAUGAGAGAGAUUGGA 3'  
::::: :::::::::::::::  
query 3' UGUCUGCUUUUCGCUAACCU 5'  
query=miR3449-5p, target=R03G\_04768, score=4, range=144-163, stra  
target 5' GCAGGAUGAGAGCGAUUGGC 3'  
.::: :::::::::::::::  
query 3' UGU-CUGCUUUUCGCUAACCU 5'  
query=miR3449-5p, target=R03G\_00079, score=4, range=1117-1135,  
strand=1  
target 5' ACAGAGGAUAGUGAUUGGA 3'  
::::: :: :::::::::::::::  
query 3' UGUCUGCUUUUCGCUAACCU 5'  
query=miR3449-5p, target=R03G\_00099, score=4, range=877-895, stra  
target 5' ACAGAGAAAAGCGGUUGGA 3'  
::::: :::::::::::::::  
query 3' UGUCUGCUUUUCGCUAACCU 5'  
query=miR3449-5p, target=R03G\_07526, score=4, range=565-583, stra  
target 5' GCAGCUGAAAGCUAUUGGA 3'  
.::: .::::: :::::::::::::::  
query 3' UGUCUGCUUUUCGCUAACCU 5'



```
query=miR3449-5p, target=R03G_02792, score=4, range=2022-2040,
strand=1
target 5' GCACUUGAAAGUGAUUGGA 3'
... ::::::::::::::
query 3' UGUCUGCUUUCGCUAACCU 5'
query=miR3449-5p, target=R03G_03414, score=4, range=601-618, str
target 5' ACAG-CAAAGUGAUUGGA 3'
:::: : ::::::::::::::
query 3' UGUCUGCUUUCGCUAACCU 5'
query=miR3449-5p, target=R03G_09135, score=4, range=4368-4386,
strand=1
target 5' GUUGAAGAAAGCGAUUGGU 3'
.. :: ::::::::::::::
query 3' UGUCUGCUUUCGCUAACCU 5'
query=miR3449-5p, target=R03G_06541, score=4, range=1555-1573,
strand=1
target 5' GCAUUUGAAAGCGAUUGGC 3'
... ::::::::::::::
query 3' UGUCUGCUUUCGCUAACCU 5'
query=miR3449-5p, target=R03G_13413, score=4, range=377-395, str
target 5' ACAGCGGAAAGCCAUUGGA 3'
:::: :::::: ::::::
query 3' UGUCUGCUUUCGCUAACCU 5'
query=miR3449-5p, target=R03G_10607, score=4, range=6827-6844,
strand=1
target 5' ACA-CCGAAAACGAUUGGA 3'
... :::::: ::::::
query 3' UGUCUGCUUUCGCUAACCU 5'
query=miR3449-5p, target=R03G_14286, score=4, range=155-174, str
target 5' ACGGGCGAGAGCGAUUAGGA 3'
:::::::::: ::::
query 3' UGUCUGCUUUCGCUAA-CCU 5'
query=miR3449-5p, target=R03G_08856, score=4, range=2948-2967,
strand=-1
target 5' AUGGAACGAAAGCGAGUGGA 3'
...: :::::::::::::: ::::
query 3' UGUC-UGCUUUCGCUAACCU 5'
query=miR3449-5p, target=R03G_01473, score=4, range=1213-1230,
strand=-1
target 5' AC-GACGAGAGCGUUUGGA 3'
:: :::::::::::::: ::::::
query 3' UGUCUGCUUUCGCUAACCU 5'
query=miR3449-5p, target=R03G_12930, score=4, range=1885-1902,
strand=-1
target 5' AC-GACGAGAGCGUUUGGA 3'
```

```
:: ::::::::::: :::::
query 3' UGUCUGCUUUCGCUAACCU 5'
query=miR3449-5p, target=R03G_13428, score=4, range=61-78, strand
target 5' AC-GACGAGAGCGUUUGGA 3'
:: ::::::::::: :::::
query 3' UGUCUGCUUUCGCUAACCU 5'
query=miR3449-5p, target=R03G_12221, score=4, range=49-66, strand
target 5' CCA-AGGAAAGCGAUUGGU 3'
:: : :::::::::::
query 3' UGUCUGCUUUCGCUAACCU 5'
query=miR3449-5p, target=R03G_10153, score=4, range=219-236, stra
target 5' ACAGA-GAAAGUGAUUCGA 3'
::::: ::::::::::: ::
query 3' UGUCUGCUUUCGCUAACCU 5'
query=miR3449-5p, target=R03G_01032, score=4, range=67-84, strand
target 5' ACGCAUGAAA-CGAUUGGA 3'
::: .::::: :::::::::::
query 3' UGUCUGCUUUCGCUAACCU 5'
query=miR1435a, target=R03G_11285, score=0, range=200-221, strand
target 5' GAAAAACUUGCACUUUAAGAAA 3'
::::: :::::::::::
query 3' CUUUUUGAACGUGAAAUCUUU 5'
query=miR1435a, target=R03G_13710, score=0, range=200-221, strand
target 5' GAAAAACUUGCACUUUAAGAAA 3'
::::: :::::::::::
query 3' CUUUUUGAACGUGAAAUCUUU 5'
query=miR1435a, target=R03G_17245, score=1, range=200-221, strand
target 5' GAAGAAUUUGCACUUUAAGAAA 3'
::::: :::::::::::
query 3' CUUUUUGAACGUGAAAUCUUU 5'
query=miR1435a, target=R03G_12006, score=1, range=200-221, strand
target 5' GAAGAAUUUGCACUUUAAGAAA 3'
::::: :::::::::::
query 3' CUUUUUGAACGUGAAAUCUUU 5'
query=miR1435a, target=R03G_14707, score=1, range=200-221, strand
target 5' GAAGAAUUUGCACUUUAAGAAA 3'
::::: :::::::::::
query 3' CUUUUUGAACGUGAAAUCUUU 5'
query=miR1435a, target=R03G_16910, score=1, range=200-221, strand
target 5' GAAGAAUUUGCACUUUAAGAAA 3'
::::: :::::::::::
query 3' CUUUUUGAACGUGAAAUCUUU 5'
query=miR1435a, target=R03G_17365, score=1, range=200-221, strand
target 5' GAAGAAUUUGCACUUUAAGAAA 3'
::::: :::::::::::
```

query 3' CUUUUUGAACGUGAAAUUCUUU 5'  
query=miR1435a, target=R03G\_01196, score=1, range=200-221, strand  
target 5' GAAGAAUUUGCACUUUAAGAAA 3'  
.....  
query 3' CUUUUUGAACGUGAAAUUCUUU 5'  
query=miR1435a, target=R03G\_13738, score=1, range=200-221, strand  
target 5' GAAGAAUUUGCACUUUAAGAAA 3'  
.....  
query 3' CUUUUUGAACGUGAAAUUCUUU 5'  
query=miR6023, target=R03G\_10323, score=2.5, range=92-111, strand  
target 5' AUCUAAGGAACUGUCAUCAG 3'  
.....  
query 3' UAGGUUUUUUGACAGUAGUU 5'  
query=miR6023, target=R03G\_05182, score=3, range=224-243, strand=  
target 5' GUUCAAGAACUGUUAUCAA 3'  
.....  
query 3' UAGGUUUUUUGACAGUAGUU 5'  
query=miR6023, target=R03G\_04478, score=3.5, range=1665-1684, str  
target 5' GAUGAAGAAACUGUCAUCAA 3'  
. . . . .  
query 3' UAGGUUUUUUGACAGUAGUU 5'  
query=miR6023, target=R03G\_03634, score=4, range=49-68, strand=1  
target 5' AUCCAAAAGACUGUCAACAU 3'  
.....  
query 3' UAGGUUUUUUGACAGUAGUU 5'  
query=miR6023, target=R03G\_04306, score=4, range=821-839, strand=  
target 5' AUCC-AAGAAUUGUCAUCAU 3'  
.... : ..  
query 3' UAGGUUUUUUGACAGUAGUU 5'  
query=miR6023, target=R03G\_04006, score=4, range=202-220, strand=  
target 5' AUCAAAAAGACUGU-AUCAA 3'  
... : .. : ..  
query 3' UAGGUUUUUUGACAGUAGUU 5'  
query=miR6023, target=R03G\_13613, score=4, range=344-362, strand=  
target 5' AUCC-ACAAGCUGUCAUUA 3'  
.... : .. : .. : ..  
query 3' UAGGUUUUUUGACAGUAGUU 5'  
query=miR6023, target=R03G\_05723, score=4, range=1057-1075, stran  
target 5' AUCCAAAAGCU-UUAUCAA 3'  
..... : .. : ..  
query 3' UAGGUUUUUUGACAGUAGUU 5'  
query=miR6023, target=R03G\_13387, score=4, range=583-601, strand=  
target 5' AUCCAAAAGCU-UUAUCAA 3'  
..... : .. : ..  
query 3' UAGGUUUUUUGACAGUAGUU 5'

```

query=miR6023, target=R03G_08960, score=4, range=151-169, strand=
target 5' AUCCAAAGAG-UGUCAUCAA 3'
..... :
query 3' UAGGUUUUUUGACAGUAGUU 5'
query=miR6023, target=R03G_08422, score=4, range=218-236, strand=
target 5' AUUUGAGAAACUGUC-UCAA 3'
..... :
query 3' UAGGUUUUUUGACAGUAGUU 5'
query=miR6023, target=R03G_16998, score=4, range=808-828, strand=
target 5' AUCCAAAUAAAGUGUCAUUA 3'
..... :
query 3' UAGGUUU-UUUGACAGUAGUU 5'
query=miR6023, target=R03G_09746, score=4, range=215-234, strand=
target 5' AGUCAAGAAACUUUCAUCAA 3'
: . . . . . :
query 3' UAGGUUUUUUGACAGUAGUU 5'
query=miR6023, target=R03G_09283, score=4, range=335-355, strand=
target 5' GUUGAAUAAAAUUGUCAUCAA 3'
. . . . :
query 3' UAGGUU-UUUUGACAGUAGUU 5'
query=miR9722, target=R03G_11557, score=3, range=261-280, strand=
target 5' UUCUCCUC-UCCAUCUUUA 3'
..... :
query 3' AAGAAGUAGAAGGGUAGAAAU 5'
query=miR9722, target=R03G_06617, score=3.5, range=798-818, stran
target 5' UUCUUUAUCUUCCAUCUUUA 3'
..... :
query 3' AAGAAGUAGAAGGGUAGAAAU 5'
query=miR9722, target=R03G_09632, score=3.5, range=156-177, stran
target 5' UUCUUUCUCCUUCCAUCUUUA 3'
..... :
query 3' AAGAAGUA-GAAGGGUAGAAAU 5'
query=miR9722, target=R03G_03357, score=4, range=63-84, strand=1
target 5' UUCUUCUUGUCCUCAUCUUUA 3'
..... :
query 3' AAGAAGUAGAAGG-GUAGAAAU 5'
query=miR9722, target=R03G_01662, score=4, range=3-24, strand=-1
target 5' UUCUUCAUCUUCUCCGUCUUUC 3'
..... :
query 3' AAGAAGUAGAAG-GGUAGAAAU 5'
query=miR9722, target=R03G_03488, score=4, range=1626-1646, stran
target 5' UUCUUCUUCUUCUCAUCUUA 3'
..... :
query 3' AAGAAGUAGAAGGGUAGAAAU 5'
query=miR9722, target=R03G_16288, score=4, range=175-195, strand=

```

target 5' UUCUUCUUCUUUCCCAUCUUA 3'  
 ::::::::::: :  
 query 3' AAGAAGUAGAAGGGUAGAAAU 5'  
 query=miR9722, target=R03G\_02442, score=4, range=1080-1099, stran  
 target 5' UUC-UCAUCUUUCAUGUUUA 3'  
 ::: ::::::::::: :  
 query 3' AAGAAGUAGAAGGGUAGAAAU 5'  
 query=miR9722, target=R03G\_00181, score=4, range=122-141, strand=  
 target 5' GUCUUCA-CUCCUAUUUUUA 3'  
 ::::::::::: :  
 query 3' AAGAAGUAGAAGGGUAGAAAU 5'  
 query=miR9722, target=R03G\_15026, score=4, range=320-339, strand=  
 target 5' UUCAUCAUCUU-CCAUUUUUA 3'  
 ::: ::::::::::: :  
 query 3' AAGAAGUAGAAGGGUAGAAAU 5'  
 query=miR9722, target=R03G\_03004, score=4, range=378-399, strand=  
 target 5' UUCUUCUUCUUCAUCAUCUUUA 3'  
 ::::::::::: :  
 query 3' AAGAAGUAGAAG-GGUAGAAAU 5'  
 query=miR2654, target=R03G\_15134, score=0, range=179-200, strand=  
 target 5' AGCACACUUCGGUCCCCUGAAUA 3'  
 ::::::::::: :  
 query 3' UCGUGUGAAGCCAGGGACUUAU 5'  
 query=miR2654, target=R03G\_03099, score=0, range=179-200, strand=  
 target 5' AGCACACUUCGGUCCCCUGAAUA 3'  
 ::::::::::: :  
 query 3' UCGUGUGAAGCCAGGGACUUAU 5'  
 query=miR2654, target=R03G\_03546, score=2, range=659-680, strand=  
 target 5' AACUCACUUCGGUCCCCUGAAUA 3'  
 : : ::::::::::: :  
 query 3' UCGUGUGAAGCCAGGGACUUAU 5'  
 query=miR2654, target=R03G\_08065, score=2, range=245-266, strand=  
 target 5' AACUCACUUCGGUCCCCUGAAUA 3'  
 : : ::::::::::: :  
 query 3' UCGUGUGAAGCCAGGGACUUAU 5'  
 query=miR2654, target=R03G\_15293, score=3, range=771-791, strand=  
 target 5' AGUAC-UUUCGGUCCUUGAAUA 3'  
 ::::::: . ::::::::::: :  
 query 3' UCGUGUGAAGCCAGGGACUUAU 5'  
 query=miR2654, target=R03G\_02968, score=4, range=1235-1256, stran  
 target 5' AGCAUGCUGCGGUCCAUGAAUA 3'  
 ::::::: :  
 query 3' UCGUGUGAAGCCAGGGACUUAU 5'  
 query=miR7492n, target=R03G\_11534, score=0, range=799-820, strand  
 target 5' CCAGCUCAAAGCCCUGAUCUUA 3'

query 3' GGUCGAGUUUCGGGACUAGAAU 5'  
query=miR7492n, target=R03G\_08848, score=0, range=109-130, strand  
target 5' CCAGCUCAAAGCCCUGAUCUUA 3'

query 3' GGUCGAGUUUCGGGACUAGAAU 5'  
query=miR7492n, target=R03G\_10720, score=1, range=799-820, strand  
target 5' CCAGCUCAAAGUCCUGAUCUUA 3'

query 3' GGUCGAGUUUCGGGACUAGAAU 5'  
query=miR7492n, target=R03G\_01951, score=1, range=799-820, strand  
target 5' CCAGCUCAAAGUCCUGAUCUUA 3'

query 3' GGUCGAGUUUCGGGACUAGAAU 5'  
query=miR7492n, target=R03G\_15154, score=1, range=799-820, strand  
target 5' CCAGCUCAAAGUCCUGAUCUUA 3'

query 3' GGUCGAGUUUCGGGACUAGAAU 5'  
query=miR7492n, target=R03G\_03987, score=1, range=799-820, strand  
target 5' CCAGCUCAAAGUCCUGAUCUUA 3'

query 3' GGUCGAGUUUCGGGACUAGAAU 5'  
query=miR7492n, target=R03G\_17409, score=1, range=799-820, strand  
target 5' CCAGCUCAAAGUCCUGAUCUUA 3'

query 3' GGUCGAGUUUCGGGACUAGAAU 5'  
query=miR7492n, target=R03G\_10044, score=1, range=799-820, strand  
target 5' CCAGCUCAAAGUCCUGAUCUUA 3'

query 3' GGUCGAGUUUCGGGACUAGAAU 5'  
query=miR7492n, target=R03G\_11244, score=1, range=799-820, strand  
target 5' CCAGCUCAAAGUCCUGAUCUUA 3'

query 3' GGUCGAGUUUCGGGACUAGAAU 5'  
query=miR7492n, target=R03G\_01313, score=1, range=799-820, strand  
target 5' CCAGCUCAAAGUCCUGAUCUUA 3'

query 3' GGUCGAGUUUCGGGACUAGAAU 5'  
query=miR7492n, target=R03G\_15873, score=1, range=799-820, strand  
target 5' CCAGCUCAAAGUCCUGAUCUUA 3'

query 3' GGUCGAGUUUCGGGACUAGAAU 5'  
query=miR7492n, target=R03G\_03558, score=1, range=799-820, strand  
target 5' CCAGCUCAAAGUCCUGAUCUUA 3'

query 3' GGUCGAGUUUCGGGACUAGAAU 5'  
query=miR7492n, target=R03G\_07994, score=1, range=799-820, strand  
target 5' CCAGCUCAAAGUCCUGAUCUUA 3'  
.....  
query 3' GGUCGAGUUUCGGGACUAGAAU 5'  
query=miR7492n, target=R03G\_01194, score=1, range=799-820, strand  
target 5' CCAGCUCAAAGUCCUGAUCUUA 3'  
.....  
query 3' GGUCGAGUUUCGGGACUAGAAU 5'  
query=miR7492n, target=R03G\_07683, score=1, range=799-820, strand  
target 5' CCAGCUCAAAGUCCUGAUCUUA 3'  
.....  
query 3' GGUCGAGUUUCGGGACUAGAAU 5'  
query=miR7492n, target=R03G\_13447, score=1, range=799-820, strand  
target 5' CCAGCUCAAAGUCCUGAUCUUA 3'  
.....  
query 3' GGUCGAGUUUCGGGACUAGAAU 5'  
query=miR7492n, target=R03G\_12526, score=1, range=799-820, strand  
target 5' CCAGCUCAAAGUCCUGAUCUUA 3'  
.....  
query 3' GGUCGAGUUUCGGGACUAGAAU 5'  
query=miR7492n, target=R03G\_13706, score=1, range=757-778, strand  
target 5' CCAGCUCAAAGUCCUGAUCUUA 3'  
.....  
query 3' GGUCGAGUUUCGGGACUAGAAU 5'  
query=miR7492n, target=R03G\_01735, score=1, range=799-820, strand  
target 5' CCAGCUCAAAGUCCUGAUCUUA 3'  
.....  
query 3' GGUCGAGUUUCGGGACUAGAAU 5'  
query=miR7492n, target=R03G\_17211, score=1, range=799-820, strand  
target 5' CCAGCUCAAAGUCCUGAUCUUA 3'  
.....  
query 3' GGUCGAGUUUCGGGACUAGAAU 5'  
query=miR7492n, target=R03G\_07119, score=1, range=124-145, strand  
target 5' CCAGCUCAAAGUCCUGAUCUUA 3'  
.....  
query 3' GGUCGAGUUUCGGGACUAGAAU 5'  
query=miR7492n, target=R03G\_12013, score=1, range=124-145, strand  
target 5' CCAGCUCAAAGUCCUGAUCUUA 3'  
.....  
query 3' GGUCGAGUUUCGGGACUAGAAU 5'  
query=miR7492n, target=R03G\_10742, score=1, range=124-145, strand  
target 5' CCAGCUCAAAGUCCUGAUCUUA 3'  
.....  
query 3' GGUCGAGUUUCGGGACUAGAAU 5'

query=miR7492n, target=R03G\_10528, score=1, range=124-145, strand  
target 5' CCAGCUCAAAGUCCUGAUCUUA 3'  
::::::::::::::::::::::::::  
query 3' GGUCGAGUUUCGGGACUAGAAU 5'  
query=miR7492n, target=R03G\_11263, score=1, range=124-145, strand  
target 5' CCAGCUCAAAGUCCUGAUCUUA 3'  
::::::::::::::::::::::::::  
query 3' GGUCGAGUUUCGGGACUAGAAU 5'  
query=miR7492n, target=R03G\_16118, score=1, range=67-88, strand=1  
target 5' CCAGCUCAAAGUCCUGAUCUUA 3'  
::::::::::::::::::::::::::  
query 3' GGUCGAGUUUCGGGACUAGAAU 5'  
query=miR7492n, target=R03G\_17213, score=1, range=124-145, strand  
target 5' CCAGCUCAAAGUCCUGAUCUUA 3'  
::::::::::::::::::::::::::  
query 3' GGUCGAGUUUCGGGACUAGAAU 5'  
query=miR7492n, target=R03G\_12174, score=1, range=124-145, strand  
target 5' CCAGCUCAAAGUCCUGAUCUUA 3'  
::::::::::::::::::::::::::  
query 3' GGUCGAGUUUCGGGACUAGAAU 5'  
query=miR7492n, target=R03G\_03617, score=3, range=799-820, strand  
target 5' CCAGCUCAAAGUCCUGACCUUA 3'  
:::::::::::::::::::::::::: :  
query 3' GGUCGAGUUUCGGGACUAGAAU 5'  
query=miR7492n, target=R03G\_11948, score=3, range=799-820, strand  
target 5' CCAGCUCAAAGUCCUGACCUUA 3'  
:::::::::::::::::::::::::: :  
query 3' GGUCGAGUUUCGGGACUAGAAU 5'  
query=miR7492n, target=R03G\_09924, score=3, range=799-820, strand  
target 5' CCAGCUCAAAGUCCUGACCUUA 3'  
:::::::::::::::::::::::::: :  
query 3' GGUCGAGUUUCGGGACUAGAAU 5'  
query=miR7492n, target=R03G\_01950, score=3, range=799-820, strand  
target 5' CCAGCUCAAAGUCCUGACCUUA 3'  
:::::::::::::::::::::::::: :  
query 3' GGUCGAGUUUCGGGACUAGAAU 5'  
query=miR7492n, target=R03G\_09199, score=3, range=799-820, strand  
target 5' CCAGCUCAAAGUCCUGACCUUA 3'  
:::::::::::::::::::::::::: :  
query 3' GGUCGAGUUUCGGGACUAGAAU 5'  
query=miR7492n, target=R03G\_05916, score=3, range=799-820, strand  
target 5' CCAGCUCAAAGUCCUGACCUUA 3'  
:::::::::::::::::::::::::: :  
query 3' GGUCGAGUUUCGGGACUAGAAU 5'  
query=miR7492n, target=R03G\_07295, score=3, range=631-652, strand





:: :::::::::::::::::::: :  
query 3' GGUCGAGUUUCGGGACUAGAAU 5'  
query=miR7492n, target=R03G\_13903, score=4, range=856-877, strand  
target 5' CCUGCUCAAAGCCCUGAUUUGA 3'  
:: :::::::::::::::::::: :  
query 3' GGUCGAGUUUCGGGACUAGAAU 5'  
query=miR7492n, target=R03G\_08906, score=4, range=856-877, strand  
target 5' CCUGCUCAAAGCCCUGAUUUGA 3'  
:: :::::::::::::::::::: :  
query 3' GGUCGAGUUUCGGGACUAGAAU 5'  
query=miR7492n, target=R03G\_05194, score=4, range=856-877, strand  
target 5' CCUGCUCAAAGCCCUGAUUUGA 3'  
:: :::::::::::::::::::: :  
query 3' GGUCGAGUUUCGGGACUAGAAU 5'  
query=miR7492n, target=R03G\_02354, score=4, range=856-877, strand  
target 5' CCUGCUCAAAGCCCUGAUUUGA 3'  
:: :::::::::::::::::::: :  
query 3' GGUCGAGUUUCGGGACUAGAAU 5'  
query=miR7492n, target=R03G\_05181, score=4, range=856-877, strand  
target 5' CCUGCUCAAAGCCCUGAUUUGA 3'  
:: :::::::::::::::::::: :  
query 3' GGUCGAGUUUCGGGACUAGAAU 5'  
query=miR7492n, target=R03G\_13664, score=4, range=856-877, strand  
target 5' CCUGCUCAAAGCCCUGAUUUGA 3'  
:: :::::::::::::::::::: :  
query 3' GGUCGAGUUUCGGGACUAGAAU 5'  
query=miR7492n, target=R03G\_13672, score=4, range=856-877, strand  
target 5' CCUGCUCAAAGCCCUGAUUUGA 3'  
:: :::::::::::::::::::: :  
query 3' GGUCGAGUUUCGGGACUAGAAU 5'  
query=miR7492n, target=R03G\_14722, score=4, range=856-877, strand  
target 5' CCUGCUCAAAGCCCUGAUUUGA 3'  
:: :::::::::::::::::::: :  
query 3' GGUCGAGUUUCGGGACUAGAAU 5'  
query=miR7492n, target=R03G\_01923, score=4, range=805-826, strand  
target 5' CCUGCUCAAAGCCCUGAUUUGA 3'  
:: :::::::::::::::::::: :  
query 3' GGUCGAGUUUCGGGACUAGAAU 5'  
query=miR7492n, target=R03G\_11486, score=4, range=565-586, strand  
target 5' CCUGCUCAAAGCCCUGAUUUGA 3'  
:: :::::::::::::::::::: :  
query 3' GGUCGAGUUUCGGGACUAGAAU 5'  
query=miR7492n, target=R03G\_04110, score=4, range=553-574, strand  
target 5' CCUGCUCAAAGCCCUGAUUUGA 3'  
:: :::::::::::::::::::: :

query 3' GGUCGAGUUUCGGGACUAGAAU 5'  
query=miR7492n, target=R03G\_01528, score=4, range=424-445, strand  
target 5' CCUGCUCAAAGCCCUGAUUUUA 3'  
:: .....: :  
query 3' GGUCGAGUUUCGGGACUAGAAU 5'  
query=miR7492n, target=R03G\_15496, score=4, range=498-519, strand  
target 5' CCUGCUCAAAGCCCUGAUUUUGA 3'  
:: .....: :  
query 3' GGUCGAGUUUCGGGACUAGAAU 5'  
query=miR7492n, target=R03G\_05535, score=4, range=241-262, strand  
target 5' CCUGCUCAAAGCCCUGAUUUUGA 3'  
:: .....: :  
query 3' GGUCGAGUUUCGGGACUAGAAU 5'  
query=miR7492n, target=R03G\_10644, score=4, range=241-262, strand  
target 5' CCUGCUCAAAGCCCUGAUUUUGA 3'  
:: .....: :  
query 3' GGUCGAGUUUCGGGACUAGAAU 5'  
query=miR7492n, target=R03G\_12139, score=4, range=229-250, strand  
target 5' CCUGCUCAAAGCCCUGAUUUUGA 3'  
:: .....: :  
query 3' GGUCGAGUUUCGGGACUAGAAU 5'  
query=miR7492n, target=R03G\_01518, score=4, range=229-250, strand  
target 5' CCUGCUCAAAGCCCUGAUUUUA 3'  
:: .....: :  
query 3' GGUCGAGUUUCGGGACUAGAAU 5'  
query=miR7492n, target=R03G\_05616, score=4, range=145-166, strand  
target 5' CCUGCUCAAAGCCCUGAUUUUGA 3'  
:: .....: :  
query 3' GGUCGAGUUUCGGGACUAGAAU 5'  
query=miR7492n, target=R03G\_16893, score=4, range=241-262, strand  
target 5' CCUGCUCAAAGCCCUGAUUUUGA 3'  
:: .....: :  
query 3' GGUCGAGUUUCGGGACUAGAAU 5'  
query=miR7492n, target=R03G\_05603, score=4, range=115-136, strand  
target 5' CCUGCUCAAAGCCCUGAUUUUGA 3'  
:: .....: :  
query 3' GGUCGAGUUUCGGGACUAGAAU 5'  
query=miR319c, target=R03G\_04030, score=1, range=1107-1126, stran  
target 5' AGCAUGCCCUUUUCAUCCAA 3'  
.....: :  
query 3' UCGUACGGGGAAAGUAGGUU 5'  
query=miR319c, target=R03G\_12114, score=2, range=169-189, strand=  
target 5' AGCAUGUCCUCUUUCAUCCAA 3'  
.....: :  
query 3' UCGUAC-GGGGAAAGUAGGUU 5'

```
query=miR319c, target=R03G_12923, score=3.5, range=822-842, stran
target 5' AGUAUGGCCCUUGUCAUCCAA 3'
::: : : : : : : : : : : :
query 3' UCGUACGGGGAA-AGUAGGUU 5'
query=miR319c, target=R03G_11333, score=3.5, range=1003-1022,
strand=-1
target 5' GCCUUGCCCUUUUCAUCCAA 3'
. : : : : : : : : : : :
query 3' UCGUACGGGGAAAGUAGGUU 5'
query=miR319c, target=R03G_13957, score=3.5, range=394-414, stran
target 5' AGCAAUCUCUCUUUCAUCCAA 3'
::: : : : : : : : : : : :
query 3' UCG-UACGGGGAAAGUAGGUU 5'
query=miR319c, target=R03G_01412, score=4, range=80-98, strand=1
target 5' AGGAU-CCCUUUUCAUCCGA 3'
:: : : : : : : : : : : :
query 3' UCGUACGGGGAAAGUAGGUU 5'
query=miR319c, target=R03G_09067, score=4, range=784-802, strand=
target 5' AACAU-CCCUUGCAUCCAA 3'
: : : : : : : : : : : :
query 3' UCGUACGGGGAAAGUAGGUU 5'
query=miR319c, target=R03G_12773, score=4, range=259-278, strand=
target 5' GGCCUGUCCUUUCAUCCAC 3'
.: : : : : : : : : : : :
query 3' UCGUACGGGGAAAGUAGGUU 5'
query=miR319c, target=R03G_15690, score=4, range=745-765, strand=
target 5' AGCAUUUCUCUUUCAUCCAA 3'
: : : : : : : : : : : :
query 3' UCGU-ACGGGGAAAGUAGGUU 5'
query=miR2609a, target=R03G_07862, score=0, range=905-926, strand
target 5' AAGUGACGAGCCAUUACUCCA 3'
: : : : : : : : : : : :
query 3' UUCACUGCUCGGUAAUGAAGGU 5'
query=miR2609a, target=R03G_10744, score=0, range=791-812, strand
target 5' AAGUGACGAGCCAUUACUCCA 3'
: : : : : : : : : : : :
query 3' UUCACUGCUCGGUAAUGAAGGU 5'
query=miR2609a, target=R03G_16366, score=0, range=791-812, strand
target 5' AAGUGACGAGCCAUUACUCCA 3'
: : : : : : : : : : : :
query 3' UUCACUGCUCGGUAAUGAAGGU 5'
query=miR2609a, target=R03G_07735, score=0, range=710-731, strand
target 5' AAGUGACGAGCCAUUACUCCA 3'
: : : : : : : : : : : :
query 3' UUCACUGCUCGGUAAUGAAGGU 5'
```



query 3' CCAGUGUCUUUCGUUGUAGGUGU 5'  
query=miR1169-3p, target=R03G\_08215, score=4, range=231-252, strand=1  
target 5' GGUCA-AGAAAGCAGCGUCUACA 3'

query 3' CCAGUGUCUUUCGUUGUAGGUGU 5'  
query=miR157a-5p, target=R03G\_04595, score=3, range=974-992, strand=1  
target 5' UGCUCU-UGUCUUCUGUCAU 3'

query 3' ACGAGAGAUAGAAGACAGUU 5'  
query=miR157a-5p, target=R03G\_16965, score=3, range=1504-1523, strand=-1  
target 5' UGCUCUCCAUCUUCUGUCAU 3'

query 3' ACGAGAGAUAGAAGACAGUU 5'  
query=miR157a-5p, target=R03G\_11173, score=3.5, range=2754-2774, strand=1  
target 5' UGCUUUCUAUCUUCUCGUUAA 3'

query 3' ACGAGAGAUAGAAGA-CAGUU 5'  
query=miR157a-5p, target=R03G\_12125, score=3.5, range=41-59, strand=1  
target 5' AGUUC-CUAUCUUCUGUAA 3'

query 3' ACGAGAGAUAGAAGACAGUU 5'  
query=miR157a-5p, target=R03G\_02069, score=3.5, range=974-992, strand=1  
target 5' UGCU-UUUGUCUUCUGUCAU 3'

query 3' ACGAGAGAUAGAAGACAGUU 5'  
query=miR157a-5p, target=R03G\_07431, score=3.5, range=135-153, strand=1  
target 5' UGCUC-CUAUCUUCUGUGAG 3'

query 3' ACGAGAGAUAGAAGACAGUU 5'  
query=miR157a-5p, target=R03G\_12149, score=3.5, range=1069-1089, strand=-1  
target 5' AGCUCUAUUAUCUUCUGUCGA 3'

query 3' ACGAGA-GAUAGAAGACAGUU 5'  
query=miR157a-5p, target=R03G\_00816, score=3.5, range=335-354, strand=-1  
target 5' UGCUUUGUAUCUUCUGUCUA 3'

query 3' ACGAGAGAUAGAAGACAGUU 5'  
query=miR157a-5p, target=R03G\_14433, score=3.5, range=5263-5281, strand=1

```
strand=-1
target 5' UGAUCUUU-UCUUCUGUCAA 3'
:: ::::: :::::::::::
query 3' ACGAGAGAUAGAAGACAGUU 5'
query=miR157a-5p, target=R03G_03674, score=4, range=356-375, stra
target 5' UGAUCUCUGUCUUGUGUCAA 3'
:: ::::: :::::::::::
query 3' ACGAGAGAUAGAAGACAGUU 5'
query=miR157a-5p, target=R03G_02944, score=4, range=2526-2544,
strand=1
target 5' UGCUCACUAAUUUUCU-UCAA 3'
::::: ::::::::::: ::::
query 3' ACGAGAGAUAGAAGACAGUU 5'
query=miR157a-5p, target=R03G_12366, score=4, range=4974-4992,
strand=1
target 5' AGCACU-UAUCUUUUGUCAA 3'
:: :: :::::::::::
query 3' ACGAGAGAUAGAAGACAGUU 5'
query=miR157a-5p, target=R03G_04854, score=4, range=614-632, stra
target 5' UGCUUUUAUCUUCU-UUAA 3'
::::: ::::::::::: ::::
query 3' ACGAGAGAUAGAAGACAGUU 5'
query=miR157a-5p, target=R03G_11943, score=4, range=892-910, stra
target 5' UGUCUUCU-UCUUCUGUCAA 3'
:: .::: :::::::::::
query 3' ACGAGAGAUAGAAGACAGUU 5'
query=miR157a-5p, target=R03G_13979, score=4, range=842-861, stra
target 5' UUAUCUGUAUCUUCUGUCAU 3'
: ::: :::::::::::
query 3' ACGAGAGAUAGAAGACAGUU 5'
query=miR157a-5p, target=R03G_08269, score=4, range=235-253, stra
target 5' UCUUUUCU-UCUUCUGUCAA 3'
: .::: :::::::::::
query 3' ACGAGAGAUAGAAGACAGUU 5'
query=miR1514a, target=R03G_15904, score=0, range=657-678, strand
target 5' CAUGCCUAGUUCAAUUGAUA 3'
::::: :::::::::::
query 3' GUACGGAUCAAAGUUUAACUUAU 5'
query=miR1514a, target=R03G_16782, score=1, range=723-744, strand
target 5' CAUGCCUCGUUUCAAUUGAUA 3'
::::: :::::::::::
query 3' GUACGGAUCAAAGUUUAACUUAU 5'
query=miR1514a, target=R03G_16780, score=1, range=723-744, strand
target 5' CAUGCCUCGUUUCAAUUGAUA 3'
::::: :::::::::::
```

query 3' GUACGGAUCAAAGUUUAACUAU 5'  
query=miR1514a, target=R03G\_16853, score=1, range=723-744, strand  
target 5' CAUGCCUCGUUUCAAUUGAUA 3'  
.....  
query 3' GUACGGAUCAAAGUUUAACUAU 5'  
query=miR1514a, target=R03G\_16855, score=1, range=723-744, strand  
target 5' CAUGCCUCGUUUCAAUUGAUA 3'  
.....  
query 3' GUACGGAUCAAAGUUUAACUAU 5'  
query=miR1514a, target=R03G\_07244, score=2, range=747-768, strand  
target 5' CAUACCUCGUUUCAAUUGAUA 3'  
... ..  
query 3' GUACGGAUCAAAGUUUAACUAU 5'  
query=miR1514a, target=R03G\_06815, score=2, range=654-675, strand  
target 5' CAUACCUCGUUUCAAUUGAUA 3'  
... ..  
query 3' GUACGGAUCAAAGUUUAACUAU 5'  
query=miR1514a, target=R03G\_07241, score=2, range=654-675, strand  
target 5' CAUACCUCGUUUCAAUUGAUA 3'  
... ..  
query 3' GUACGGAUCAAAGUUUAACUAU 5'  
query=miR1514a, target=R03G\_09518, score=3, range=510-531, strand  
target 5' CAUGGUUGGUUUCAGAUUGAUA 3'  
.... ..  
query 3' GUACGGAUCAAAGUUUAACUAU 5'  
query=miR1514a, target=R03G\_06812, score=3, range=720-742, strand  
target 5' UAUGAUCUCGUUUCAAUUGAUA 3'  
.... ..  
query 3' GUAC-GGAUCAAAGUUUAACUAU 5'  
query=miR1514a, target=R03G\_11033, score=4, range=1146-1167, str  
target 5' CAUGUCUUGUUCAAUAGAUG 3'  
.....  
query 3' GUACGGAUCAAAGUUUAACUAU 5'  
query=miR5228, target=R03G\_16693, score=0, range=1470-1493, stran  
target 5' UCCAUCAAGUUGCUAUCACCACUA 3'  
.....  
query 3' AGGUAGUUAACGAUAGUGGUGAU 5'  
query=miR5228, target=R03G\_12527, score=0, range=1470-1493, stran  
target 5' UCCAUCAAGUUGCUAUCACCACUA 3'  
.....  
query 3' AGGUAGUUAACGAUAGUGGUGAU 5'  
query=miR5228, target=R03G\_14347, score=0, range=1464-1487, stran  
target 5' UCCAUCAAGUUGCUAUCACCACUA 3'  
.....  
query 3' AGGUAGUUAACGAUAGUGGUGAU 5'



query=miR5228, target=R03G\_16539, score=0, range=1362-1385, stran  
target 5' UCCAUCAAGUUGCUAUCACCACUA 3'  
::::::::::::::::::::::::::::  
query 3' AGGUAGUUCAACGAUAGUGGUGAU 5'  
query=miR5228, target=R03G\_12538, score=0, range=1362-1385, stran  
target 5' UCCAUCAAGUUGCUAUCACCACUA 3'  
::::::::::::::::::::::::::::  
query 3' AGGUAGUUCAACGAUAGUGGUGAU 5'  
query=miR5228, target=R03G\_06425, score=0, range=1464-1487, stran  
target 5' UCCAUCAAGUUGCUAUCACCACUA 3'  
::::::::::::::::::::::::::::  
query 3' AGGUAGUUCAACGAUAGUGGUGAU 5'  
query=miR5228, target=R03G\_09547, score=0, range=1464-1487, stran  
target 5' UCCAUCAAGUUGCUAUCACCACUA 3'  
::::::::::::::::::::::::::::  
query 3' AGGUAGUUCAACGAUAGUGGUGAU 5'  
query=miR5228, target=R03G\_16361, score=0, range=1464-1487, stran  
target 5' UCCAUCAAGUUGCUAUCACCACUA 3'  
::::::::::::::::::::::::::::  
query 3' AGGUAGUUCAACGAUAGUGGUGAU 5'  
query=miR5228, target=R03G\_05330, score=0, range=1464-1487, stran  
target 5' UCCAUCAAGUUGCUAUCACCACUA 3'  
::::::::::::::::::::::::::::  
query 3' AGGUAGUUCAACGAUAGUGGUGAU 5'  
query=miR5228, target=R03G\_17021, score=0, range=1464-1487, stran  
target 5' UCCAUCAAGUUGCUAUCACCACUA 3'  
::::::::::::::::::::::::::::  
query 3' AGGUAGUUCAACGAUAGUGGUGAU 5'  
query=miR5228, target=R03G\_12677, score=0, range=1464-1487, stran  
target 5' UCCAUCAAGUUGCUAUCACCACUA 3'  
::::::::::::::::::::::::::::  
query 3' AGGUAGUUCAACGAUAGUGGUGAU 5'  
query=miR5228, target=R03G\_04933, score=0, range=1464-1487, stran  
target 5' UCCAUCAAGUUGCUAUCACCACUA 3'  
::::::::::::::::::::::::::::  
query 3' AGGUAGUUCAACGAUAGUGGUGAU 5'  
query=miR5228, target=R03G\_02704, score=0, range=1464-1487, stran  
target 5' UCCAUCAAGUUGCUAUCACCACUA 3'  
::::::::::::::::::::::::::::  
query 3' AGGUAGUUCAACGAUAGUGGUGAU 5'  
query=miR5228, target=R03G\_05344, score=0, range=1464-1487, stran  
target 5' UCCAUCAAGUUGCUAUCACCACUA 3'  
::::::::::::::::::::::::::::  
query 3' AGGUAGUUCAACGAUAGUGGUGAU 5'  
query=miR5228, target=R03G\_03778, score=0, range=1422-1445, stran

target 5' UCCAUCAAGUUGCUAUCACCACUA 3'  
:~::~  
query 3' AGGUAGUUCAACGAUAGUGGUGAU 5'  
query=miR5228, target=R03G\_17422, score=0, range=765-788, strand=  
target 5' UCCAUCAAGUUGCUAUCACCACUA 3'  
:~::~  
query 3' AGGUAGUUCAACGAUAGUGGUGAU 5'  
query=miR5228, target=R03G\_12532, score=0, range=1470-1493, stran  
target 5' UCCAUCAAGUUGCUAUCACCACUA 3'  
:~::~  
query 3' AGGUAGUUCAACGAUAGUGGUGAU 5'  
query=miR5228, target=R03G\_01936, score=0, range=1470-1493, stran  
target 5' UCCAUCAAGUUGCUAUCACCACUA 3'  
:~::~  
query 3' AGGUAGUUCAACGAUAGUGGUGAU 5'  
query=miR5228, target=R03G\_09493, score=0, range=255-278, strand=  
target 5' UCCAUCAAGUUGCUAUCACCACUA 3'  
:~::~  
query 3' AGGUAGUUCAACGAUAGUGGUGAU 5'  
query=miR5228, target=R03G\_00242, score=0, range=1470-1493, stran  
target 5' UCCAUCAAGUUGCUAUCACCACUA 3'  
:~::~  
query 3' AGGUAGUUCAACGAUAGUGGUGAU 5'  
query=miR5228, target=R03G\_11414, score=0, range=1362-1385, stran  
target 5' UCCAUCAAGUUGCUAUCACCACUA 3'  
:~::~  
query 3' AGGUAGUUCAACGAUAGUGGUGAU 5'  
query=miR5228, target=R03G\_08105, score=0, range=219-242, strand=  
target 5' UCCAUCAAGUUGCUAUCACCACUA 3'  
:~::~  
query 3' AGGUAGUUCAACGAUAGUGGUGAU 5'  
query=miR5228, target=R03G\_13918, score=1, range=1470-1493, stran  
target 5' UCCAUCAAGUUGCUAUCACCGCUA 3'  
:~::~  
query 3' AGGUAGUUCAACGAUAGUGGUGAU 5'  
query=miR5228, target=R03G\_10804, score=1, range=1470-1493, stran  
target 5' UCCAUCAAGUUGCUAUCACCGCUA 3'  
:~::~  
query 3' AGGUAGUUCAACGAUAGUGGUGAU 5'  
query=miR5228, target=R03G\_07311, score=1, range=1470-1493, stran  
target 5' UCCAUCAAGUUGCUAUCACCGCUA 3'  
:~::~  
query 3' AGGUAGUUCAACGAUAGUGGUGAU 5'  
query=miR5228, target=R03G\_01614, score=1, range=1470-1493, stran  
target 5' UCCAUCAAGUUGCUAUCACCGCUA 3'

query 3' AGGUAGUUCAACGAUAGUGGUGAU 5'  
query=miR5228, target=R03G\_04126, score=1, range=1464-1487, stran  
target 5' UCCAUCAAGUUGCUAUCACCGCUA 3'

query 3' AGGUAGUUCAACGAUAGUGGUGAU 5'  
query=miR5228, target=R03G\_12673, score=1, range=765-788, strand=  
target 5' UCCAUCAAGUUGCUAUCACCGCUA 3'

query 3' AGGUAGUUCAACGAUAGUGGUGAU 5'  
query=miR5228, target=R03G\_03619, score=1, range=1470-1493, stran  
target 5' UCCAUCAAGUUGCUAUCACCGCUA 3'

query 3' AGGUAGUUCAACGAUAGUGGUGAU 5'  
query=miR5228, target=R03G\_02821, score=1, range=1470-1493, stran  
target 5' UCCAUCAAGUUGCUAUCACCGCUA 3'

query 3' AGGUAGUUCAACGAUAGUGGUGAU 5'  
query=miR5228, target=R03G\_05515, score=1, range=459-482, strand=  
target 5' UCCAUCAAGUUGCUAUCACCGCUA 3'

query 3' AGGUAGUUCAACGAUAGUGGUGAU 5'  
query=miR5228, target=R03G\_00295, score=1, range=1308-1331, stran  
target 5' UCCAUCAAGUUGCUAUCACCGCUA 3'

query 3' AGGUAGUUCAACGAUAGUGGUGAU 5'  
query=miR5228, target=R03G\_13722, score=1, range=1461-1484, stran  
target 5' UCCAUCAUUUGCUAUCACCACUA 3'

query 3' AGGUAGUUCAACGAUAGUGGUGAU 5'  
query=miR1428e-3p, target=R03G\_13882, score=0, range=631-652, str  
target 5' AAAGAGUUCAUGGCAUUUCUUA 3'

query 3' UUUCUCAAGUACCGUAAAGAAU 5'  
query=miR1428e-3p, target=R03G\_05325, score=0, range=631-652, str  
target 5' AAAGAGUUCAUGGCAUUUCUUA 3'

query 3' UUUCUCAAGUACCGUAAAGAAU 5'  
query=miR1428e-3p, target=R03G\_00809, score=0, range=631-652, str  
target 5' AAAGAGUUCAUGGCAUUUCUUA 3'

query 3' UUUCUCAAGUACCGUAAAGAAU 5'  
query=miR1428e-3p, target=R03G\_13730, score=0, range=394-415, str  
target 5' AAAGAGUUCAUGGCAUUUCUUA 3'

query 3' UUUCUCAAGUACCGUAAAGAAU 5'  
query=miR1428e-3p, target=R03G\_03721, score=1, range=631-652, str  
target 5' AAAGAAUUCAUGGCAUUUCUUA 3'  
.....  
query 3' UUUCUCAAGUACCGUAAAGAAU 5'  
query=miR1428e-3p, target=R03G\_00141, score=2, range=631-652, str  
target 5' AAAGAAUUCAUGGUAUUUCUUA 3'  
.....  
query 3' UUUCUCAAGUACCGUAAAGAAU 5'  
query=miR1428e-3p, target=R03G\_02269, score=2.5, range=107-128,  
strand=-1  
target 5' AAGAAUUCAUGGCAUUUCUUA 3'  
.. : ..  
query 3' UUUCUCAAGUACCGUAAAGAAU 5'  
query=miR1850.1, target=R03G\_13985, score=1, range=15-35, strand=  
target 5' UCCCAACUCCCAAACUUUCAU 3'  
.....  
query 3' AGGGUUGAGGGUUUGAAAGUU 5'  
query=miR1850.1, target=R03G\_10032, score=2, range=9-29, strand=1  
target 5' UCCCAACUCCCAAACUUUCCA 3'  
..... :  
query 3' AGGGUUGAGGGUUUGAAAGUU 5'  
query=miR1850.1, target=R03G\_14387, score=3, range=1228-1248, str  
target 5' UUUCAAAUCCAGACUUUCA 3'  
.....  
query 3' AGGGUUGAGGGUUUGAAAGUU 5'  
query=miR1850.1, target=R03G\_07512, score=3, range=77-96, strand=  
target 5' UCUUAA-UCUCAAACUUUCA 3'  
.....  
query 3' AGGGUUGAGGGUUUGAAAGUU 5'  
query=miR1850.1, target=R03G\_07363, score=4, range=2-22, strand=1  
target 5' UGCCACCACCCAAACUUUCAC 3'  
: : : : :  
query 3' AGGGUUGAGGGUUUGAAAGUU 5'  
query=miR1850.1, target=R03G\_06331, score=4, range=1133-1153,  
strand=-1  
target 5' GUUCAAGUCCAAACUUUCA 3'  
.....  
query 3' AGGGUUGAGGGUUUGAAAGUU 5'  
query=miR1850.1, target=R03G\_06931, score=4, range=404-424, stran  
target 5' UCUUAUCGCCUAAACUUUCA 3'  
..... :  
query 3' AGGGUUGAGGGUUUGAAAGUU 5'  
query=miR1850.1, target=R03G\_08585, score=4, range=893-912, stran  
target 5' UGUUAA-UCCUAAACUUUCA 3'

: .::: :::::::::::::::  
query 3' AGGGUUGAGGGUUUGAAAGUU 5'  
query=miR835-3p, target=R03G\_14509, score=0, range=838-856, stran  
target 5' CUCCUGGCGUAUCUCUUCA 3'  
:::::::::::::::::::  
query 3' GAGGACCGCAUAGAGAAGU 5'  
query=miR835-3p, target=R03G\_17407, score=3, range=810-828, stran  
target 5' CUCAGGGCGUAUUUCUUCA 3'  
::: :::::::::::::::::::::  
query 3' GAGGACCGCAUAGAGAAGU 5'  
query=miR835-3p, target=R03G\_12688, score=3.5, range=500-517, str  
target 5' CUUCUGGCG-AUCUCUUCU 3'  
::::::::::::: :::::::::::::::  
query 3' GAGGACCGCAUAGAGAAGU 5'  
query=miR835-3p, target=R03G\_15730, score=3.5, range=2547-2566,  
strand=-1  
target 5' CUACUUGGCGCAUCUCUUCA 3'  
:: :.::::: :::::::::::::::  
query 3' GA-GGACCGCAUAGAGAAGU 5'  
query=miR835-3p, target=R03G\_14020, score=3.5, range=3683-3700,  
strand=-1  
target 5' UUGCUGGCGUAUCU-UUCA 3'  
.: ::::::::::::::: :::::  
query 3' GAGGACCGCAUAGAGAAGU 5'  
query=miR835-3p, target=R03G\_12347, score=4, range=438-456, stran  
target 5' UUCUUGGGGUAUCUCUUCU 3'  
.::::: :::::::::::::::  
query 3' GAGGACCGCAUAGAGAAGU 5'  
query=miR835-3p, target=R03G\_13123, score=4, range=2850-2867,  
strand=-1  
target 5' CUUUU-GCAUAUCUCUUCA 3'  
:..: :: :::::::::::::::  
query 3' GAGGACCGCAUAGAGAAGU 5'  
query=miR7536a, target=R03G\_01539, score=3.5, range=2028-2045,  
strand=-1  
target 5' UAUUCU-GAGCAUGCUUCA 3'  
.: ::: :::::::::::::::  
query 3' GUCAGAGCUCGUACGAAGU 5'  
query=miR7536a, target=R03G\_11116, score=3.5, range=266-283, stra  
target 5' AAGUUUC-AGCAUGCUUCA 3'  
:..: :::::::::::::::  
query 3' GUCAGAGCUCGUACGAAGU 5'  
query=miR7536a, target=R03G\_01272, score=4, range=3251-3269, stra  
target 5' CGGUCUGGAGUAUGCUUCG 3'  
:..: :::::::::::::::

```
query 3' GUCAGAGCUCGUACGAAGU 5'
query=miR7536a, target=R03G_13195, score=4, range=1963-1982, stra
target 5' CAGCUCGAGAGCAUGCUUCA 3'
::: :: :
query 3' GUC-AGAGCUCGUACGAAGU 5'
query=miR7536a, target=R03G_09900, score=4, range=655-672, strand
target 5' CAGUUAU-GAGCAUGCUUCU 3'
:::: : :
query 3' GUCAGAGCUCGUACGAAGU 5'
query=miR7536a, target=R03G_10956, score=4, range=1451-1468, stra
target 5' CA-UCUUGAGCGUGUUUCA 3'
:: :
query 3' GUCAGAGCUCGUACGAAGU 5'
query=miR7536a, target=R03G_04849, score=4, range=468-486, strand
target 5' CUGUCUCGAGCAUGCAUCC 3'
: :
query 3' GUCAGAGCUCGUACGAAGU 5'
query=miR7536a, target=R03G_12591, score=4, range=516-533, strand
target 5' CAUUCUUGAGCAUG-UUCA 3'
:: :
query 3' GUCAGAGCUCGUACGAAGU 5'
query=miR7536a, target=R03G_15479, score=4, range=4203-4220, stra
target 5' UGGU-GCGAGCAUGUUUCA 3'
.... :
query 3' GUCAGAGCUCGUACGAAGU 5'
query=miR7536a, target=R03G_00227, score=4, range=26-44, strand=-
target 5' CCAUAACGAGCAUGCUUCA 3'
: :
query 3' GUCAGAGCUCGUACGAAGU 5'
query=miR7536a, target=R03G_01978, score=4, range=1356-1373, stra
target 5' CUGCCUCGAGCAUG-UUCA 3'
: :
query 3' GUCAGAGCUCGUACGAAGU 5'
query=miR856-3p, target=R03G_02165, score=2, range=2-21, strand=-
target 5' AAUAACCACAAUCACAUUCA 3'
:
query 3' AAUUGGUGUUAGUGUAAGU 5'
query=miR856-3p, target=R03G_08586, score=3, range=206-225, stran
target 5' UUA AAAAACAUCACAUUCA 3'
:: :
query 3' AAUUGGUGUUAGUGUAAGU 5'
query=miR856-3p, target=R03G_05389, score=3.5, range=3773-3791,
strand=-1
target 5' UUUAA-UAUAGUCACAUUCA 3'
:::: :

```

query 3' AAUUGGUGUUAGUGUAAGU 5'  
query=miR856-3p, target=R03G\_14809, score=4, range=135-154, stran  
target 5' UCUUACUACAAUCACAUUUG 3'  
: : ::.....  
query 3' AAUUGGUGUUAGUGUAAGU 5'  
query=miR856-3p, target=R03G\_03718, score=4, range=69-89, strand=  
target 5' GUUCAUUAACAAUCACAUUCA 3'  
:: .. :::::  
query 3' AAUUGG-UGUUAGUGUAAGU 5'  
query=miR856-3p, target=R03G\_13946, score=4, range=348-368, stran  
target 5' UUUACACCACGGUCAUAUUCA 3'  
:::: :::::  
query 3' AAU-UGGUGUUAGUGUAAGU 5'  
query=miR856-3p, target=R03G\_02487, score=4, range=5511-5530,  
strand=-1  
target 5' CAUAAUUAUAAUCACAUUCA 3'  
::::: :::::  
query 3' AAUUGGUGUUAGUGUAAGU 5'  
query=miR856-3p, target=R03G\_02020, score=4, range=195-214, stran  
target 5' UUGAACAAUAAUCACAUUUA 3'  
:: :: :::::  
query 3' AAUUGGUGUUAGUGUAAGU 5'  
query=miR856-3p, target=R03G\_01403, score=4, range=1716-1734,  
strand=-1  
target 5' UUUAAAGCACAUCAC-UUUA 3'  
::::: ::::: :::  
query 3' AAUUGGUGUUAGUGUAAGU 5'  
query=miR856-3p, target=R03G\_00933, score=4, range=2679-2697,  
strand=-1  
target 5' UUUAA-GACAAUCAUUAUUA 3'  
::::: ::::: :::  
query 3' AAUUGGUGUUAGUGUAAGU 5'  
query=miR6030, target=R03G\_02123, score=3.5, range=1708-1728, str  
target 5' GGUAUGGGUGGUAUGGGUGGU 3'  
::: :: :::::  
query 3' CCAGACAUACCAUACCCACCU 5'  
query=miR6030, target=R03G\_02086, score=4, range=2452-2472, stran  
target 5' GAACUUAUUGGUAUGGGUGGA 3'  
: :: :::::  
query 3' CCAGACAUACCAUACCCACCU 5'  
query=miR6030, target=R03G\_06021, score=4, range=713-732, strand=  
target 5' GUUCUCU-UGGUAUGGGUGGU 3'  
: :: : :::::  
query 3' CCAGACAUACCAUACCCACCU 5'  
query=miR773a, target=R03G\_04126, score=0, range=900-920, strand=

target 5' CGUGACAAAAGUGGCAGCAAA 3'  
::::::::::::::::::::::::::  
query 3' GCACUGUUUUACCGUCGUUU 5'  
query=miR773a, target=R03G\_16782, score=2, range=651-670, strand=  
target 5' GGUG-CAAAGUGGCAGCAAA 3'  
::: ::::::::::::::::::::  
query 3' GCACUGUUUUACCGUCGUUU 5'  
query=miR773a, target=R03G\_16780, score=2, range=651-670, strand=  
target 5' GGUG-CAAAGUGGCAGCAAA 3'  
::: ::::::::::::::::::::  
query 3' GCACUGUUUUACCGUCGUUU 5'  
query=miR773a, target=R03G\_16853, score=2, range=651-670, strand=  
target 5' GGUG-CAAAGUGGCAGCAAA 3'  
::: ::::::::::::::::::::  
query 3' GCACUGUUUUACCGUCGUUU 5'  
query=miR773a, target=R03G\_16855, score=2, range=651-670, strand=  
target 5' GGUG-CAAAGUGGCAGCAAA 3'  
::: ::::::::::::::::::::  
query 3' GCACUGUUUUACCGUCGUUU 5'  
query=miR773a, target=R03G\_15904, score=2, range=585-604, strand=  
target 5' GGUG-CAAAGUGGCAGCAAA 3'  
::: ::::::::::::::::::::  
query 3' GCACUGUUUUACCGUCGUUU 5'  
query=miR773a, target=R03G\_16361, score=3, range=900-920, strand=  
target 5' CGUGACAAAAGUUGCGGCAAA 3'  
:::::::::::::::::: ::::::::::::  
query 3' GCACUGUUUUACCGUCGUUU 5'  
query=miR773a, target=R03G\_17422, score=3, range=201-221, strand=  
target 5' CGUGACAAAAGUUGCGGCAAA 3'  
:::::::::::::::::: ::::::::::::  
query 3' GCACUGUUUUACCGUCGUUU 5'  
query=miR773a, target=R03G\_07244, score=4, range=674-694, strand=  
target 5' GGUCCAAAAGUGGCAGCAAA 3'  
: ::::::::::::::::::::  
query 3' GCACUGUUUUACCGUCGUUU 5'  
query=miR773a, target=R03G\_06815, score=4, range=581-601, strand=  
target 5' GGUCCAAAAGUGGCAGCAAA 3'  
: ::::::::::::::::::::  
query 3' GCACUGUUUUACCGUCGUUU 5'  
query=miR773a, target=R03G\_12228, score=4, range=647-667, strand=  
target 5' GGUCCAAAAGUGGCAGCAAA 3'  
: ::::::::::::::::::::  
query 3' GCACUGUUUUACCGUCGUUU 5'  
query=miR773a, target=R03G\_12986, score=4, range=647-667, strand=  
target 5' GGUCCAAAAGUGGCAGCAAA 3'



: :::::::::::::::  
query 3' GCACUGUUUUCACCGUCGUUU 5'  
query=miR773a, target=R03G\_12985, score=4, range=647-667, strand=  
target 5' GGGUCCAAAAGUGGCAGCAAA 3'  
: :::::::::::::::  
query 3' GCACUGUUUUCACCGUCGUUU 5'  
query=miR773a, target=R03G\_12229, score=4, range=647-667, strand=  
target 5' GGGUCCAAAAGUGGCAGCAAA 3'  
: :::::::::::::::  
query 3' GCACUGUUUUCACCGUCGUUU 5'  
query=miR773a, target=R03G\_07241, score=4, range=581-601, strand=  
target 5' GGGUCCAAAAGUGGCAGCAAA 3'  
: :::::::::::::::  
query 3' GCACUGUUUUCACCGUCGUUU 5'  
query=miR773a, target=R03G\_00573, score=4, range=419-439, strand=  
target 5' GGGUCCAAAAGUGGCAGCAAA 3'  
: :::::::::::::::  
query 3' GCACUGUUUUCACCGUCGUUU 5'  
query=miR773a, target=R03G\_06812, score=4, range=647-667, strand=  
target 5' GGGUCCAAAAGUGGCAGCAAA 3'  
: :::::::::::::::  
query 3' GCACUGUUUUCACCGUCGUUU 5'  
query=miR773a, target=R03G\_15475, score=4, range=467-487, strand=  
target 5' GGGUCCAAAAGUGGCAGCAAA 3'  
: :::::::::::::::  
query 3' GCACUGUUUUCACCGUCGUUU 5'  
query=miR773a, target=R03G\_01424, score=4, range=347-366, strand=  
target 5' UGUUGC-GAAGUGGCAGCAAG 3'  
.:: .: .:::::  
query 3' GCACUGUUUUCACCGUCGUUU 5'  
query=miR5287a, target=R03G\_16747, score=0, range=30-51, strand=-  
target 5' AUCCUCCGUCAUAAUUAUUGCAA 3'  
: :::::::::::::::  
query 3' UAGGAGGCAGUAUUUAUAACGUU 5'  
query=miR5287a, target=R03G\_07725, score=0, range=30-51, strand=-  
target 5' AUCCUCCGUCAUAAUUAUUGCAA 3'  
: :::::::::::::::  
query 3' UAGGAGGCAGUAUUUAUAACGUU 5'  
query=miR5287a, target=R03G\_15166, score=2, range=639-660, strand  
target 5' AUCCUCCGUCAUAAUUUUGCAA 3'  
: :::::::::::::::  
query 3' UAGGAGGCAGUAUUUAUAACGUU 5'  
query=miR5287a, target=R03G\_00287, score=2, range=531-552, strand  
target 5' AUCCUCCGUCAUAAUCUUGCAA 3'  
: :::::::::::::::

```

query 3' UAGGAGGCAGUAUUUAACGUU 5'
query=miR5287a, target=R03G_05940, score=2, range=348-369, strand
target 5' AUCCUCCGUCAUAAUCUUGCAA 3'
.....:
query 3' UAGGAGGCAGUAUUUAACGUU 5'
query=miR5287a, target=R03G_12198, score=3, range=39-60, strand=-
target 5' AUCCUCCAUCAUAAUCUUGCAA 3'
.....:
query 3' UAGGAGGCAGUAUUUAACGUU 5'
query=miR5287a, target=R03G_00237, score=4, range=108-129, strand
target 5' AUCCUCCGUCAUAAACCUUGCAA 3'
.....:
query 3' UAGGAGGCAGUAUUUAACGUU 5'
query=miR5654a, target=R03G_10995, score=3.5, range=161-180, stra
target 5' GGAUGGUGUUUUGGAUUUAU 3'
.....:
query 3' CCUACUACGAACCCUAAAUA 5'
query=miR5654a, target=R03G_02461, score=3.5, range=1316-1335,
strand=-1
target 5' AAAUUGUGCUUGGGAUUUUAU 3'
:: .....:
query 3' CCUACUACGAACCCUAAAUA 5'
query=miR5654a, target=R03G_12701, score=4, range=125-145, strand
target 5' UUUUGACUGCUUGGGAUUUUAU 3'
::: .....:
query 3' CCUACU-ACGAACCCUAAAUA 5'
query=miR9672-5p, target=R03G_10363, score=0, range=1486-1506,
strand=-1
target 5' GACACCACUGACUGCCUUAGG 3'
.....:
query 3' CUGUGGUGACUGACGGAAUCC 5'
query=miR9672-5p, target=R03G_01142, score=4, range=259-278, stra
target 5' GGCAUC-CUGACUGCCUUGGC 3'
.....:
query 3' CUGUGGUGACUGACGGAAUCC 5'
query=miR9672-5p, target=R03G_08461, score=4, range=691-711, stra
target 5' GAUAUCAGUGAUUGCUUUAGG 3'
.....:
query 3' CUGUGGUGACUGACGGAAUCC 5'
query=miR9672-5p, target=R03G_14127, score=4, range=162-181, stra
target 5' GA-ACUGCUGACUGCUUUAGC 3'
:: .....:
query 3' CUGUGGUGACUGACGGAAUCC 5'
query=miR1512a-3p, target=R03G_12005, score=1, range=1189-1210,
strand=-1

```

```

target 5' CAAAACUGACAUUCUUAAGGCA 3'
::::::::::::::::::::::::::
query 3' GUUUUGACUGUAAGAAUUUCGU 5'
query=miR1512a-3p, target=R03G_04676, score=1, range=1189-1210,
strand=-1
target 5' CAAAACUGACAUUCUUAAGGCA 3'
::::::::::::::::::::::::::
query 3' GUUUUGACUGUAAGAAUUUCGU 5'
query=miR1512a-3p, target=R03G_05928, score=1, range=961-982,
strand=-1
target 5' CAAAACUGACAUUCUUAAGGCA 3'
::::::::::::::::::::::::::
query 3' GUUUUGACUGUAAGAAUUUCGU 5'
query=miR1512a-3p, target=R03G_12080, score=1, range=772-793,
strand=-1
target 5' CAAAACUGACAUUCUUAAGGCA 3'
::::::::::::::::::::::::::
query 3' GUUUUGACUGUAAGAAUUUCGU 5'
query=miR1512a-3p, target=R03G_11407, score=1, range=772-793,
strand=-1
target 5' CAAAACUGACAUUCUUAAGGCA 3'
::::::::::::::::::::::::::
query 3' GUUUUGACUGUAAGAAUUUCGU 5'
query=miR1512a-3p, target=R03G_14636, score=1, range=565-586,
strand=-1
target 5' CAAAACUGACAUUCUUAAGGCA 3'
::::::::::::::::::::::::::
query 3' GUUUUGACUGUAAGAAUUUCGU 5'
query=miR1512a-3p, target=R03G_12687, score=1.5, range=565-586,
strand=-1
target 5' CAAAGCUGACAUUCUUAAGGCA 3'
::::::::::::::::::::::::::
query 3' GUUUUGACUGUAAGAAUUUCGU 5'
query=miR1512a-3p, target=R03G_13717, score=3, range=564-585,
strand=-1
target 5' CAAAACUGAAAUUCUUAAGGCA 3'
:::::::::::: ::::::::::::::
query 3' GUUUUGACUGUAAGAAUUUCGU 5'
query=miR6264, target=R03G_00009, score=0, range=312-329, strand=
target 5' UUGACACGGUCCAAGAAU 3'
::::::::::::::::::::::::::
query 3' AACUGUGCCAGGUUCUUA 5'
query=miR6264, target=R03G_15055, score=0, range=312-329, strand=
target 5' UUGACACGGUCCAAGAAU 3'
::::::::::::::::::::::::::

```

```

query 3' AACUGUGCCAGGUUCUUA 5'
query=miR6264, target=R03G_08282, score=0, range=312-329, strand=
target 5' UUGACACGGUCCAAGAAU 3'
.....:
query 3' AACUGUGCCAGGUUCUUA 5'
query=miR6264, target=R03G_08159, score=1, range=312-329, strand=
target 5' UUAACACGGUCCAAGAAU 3'
:: .....:
query 3' AACUGUGCCAGGUUCUUA 5'
query=miR6264, target=R03G_03474, score=3, range=538-555, strand=
target 5' GUAACAUGGUCCAAGAAU 3'
: .....:
query 3' AACUGUGCCAGGUUCUUA 5'
query=miR6264, target=R03G_12260, score=3, range=288-305, strand=
target 5' CUGGUACGGUCCAAGAAU 3'
.....:
query 3' AACUGUGCCAGGUUCUUA 5'
query=miR6264, target=R03G_07359, score=3, range=797-815, strand=
target 5' UUGAGCACUGUCCAAGAAU 3'
.... ::: .....:
query 3' AACU-GUGCCAGGUUCUUA 5'
query=miR6264, target=R03G_13521, score=3.5, range=513-530, stran
target 5' UUGGCACGGUCCGGGAAG 3'
.....:
query 3' AACUGUGCCAGGUUCUUA 5'
query=miR6264, target=R03G_15623, score=3.5, range=261-278, stran
target 5' UUGGCACGAUCCAAGAAA 3'
.....: .....:
query 3' AACUGUGCCAGGUUCUUA 5'
query=miR6264, target=R03G_17127, score=3.5, range=1739-1756,
strand=-1
target 5' UUGUUACGGUCAAGAAU 3'
... ..: .....:
query 3' AACUGUGCCAGGUUCUUA 5'
query=miR6264, target=R03G_14386, score=4, range=286-303, strand=
target 5' UUGACACGGGCCAAGGAG 3'
.....: .....:
query 3' AACUGUGCCAGGUUCUUA 5'
query=miR6264, target=R03G_02400, score=4, range=422-439, strand=
target 5' UAUACAUGGUCCAAGAAU 3'
: .....:
query 3' AACUGUGCCAGGUUCUUA 5'
query=miR6264, target=R03G_17159, score=4, range=383-400, strand=
target 5' UUGAAAUGGUACAAGAAU 3'
.... :.... :.....:

```

query 3' AACUGUGCCAGGUUCUUA 5'  
query=miR6264, target=R03G\_02698, score=4, range=263-280, strand=  
target 5' UUGAAAUGGUACAAGAAU 3'  
:::: ::::: ::::: :::::  
query 3' AACUGUGCCAGGUUCUUA 5'  
query=miR6264, target=R03G\_08564, score=4, range=403-421, strand=  
target 5' UUGACAAUGGUACAAGAAU 3'  
:::: ::::: ::::: :::::  
query 3' AACUG-UGCCAGGUUCUUA 5'  
query=miR6264, target=R03G\_14331, score=4, range=4663-4680, stran  
target 5' AUGAAACGGUUCAAGAAA 3'  
::: ::::: ::::: :::::  
query 3' AACUGUGCCAGGUUCUUA 5'  
query=miR6264, target=R03G\_02636, score=4, range=455-471, strand=  
target 5' UUGA-AUGGUUCAAGAAC 3'  
:::: ::::: ::::: :::::  
query 3' AACUGUGCCAGGUUCUUA 5'  
query=miR6264, target=R03G\_04361, score=4, range=455-471, strand=  
target 5' UUGA-AUGGUUCAAGAAC 3'  
:::: ::::: ::::: :::::  
query 3' AACUGUGCCAGGUUCUUA 5'  
query=miR6264, target=R03G\_09340, score=4, range=455-471, strand=  
target 5' UUGA-AUGGUUCAAGAAC 3'  
:::: ::::: ::::: :::::  
query 3' AACUGUGCCAGGUUCUUA 5'  
query=miR6264, target=R03G\_00174, score=4, range=455-471, strand=  
target 5' UUGA-AUGGUUCAAGAAC 3'  
:::: ::::: ::::: :::::  
query 3' AACUGUGCCAGGUUCUUA 5'  
query=miR6264, target=R03G\_08147, score=4, range=434-450, strand=  
target 5' UUGA-AUGGUUCAAGAAC 3'  
:::: ::::: ::::: :::::  
query 3' AACUGUGCCAGGUUCUUA 5'  
query=miR6264, target=R03G\_05475, score=4, range=58-74, strand=1  
target 5' UGGAC-CGGUUCAAGAAU 3'  
: ::: ::::: ::::: :::::  
query 3' AACUGUGCCAGGUUCUUA 5'  
query=miR6264, target=R03G\_06915, score=4, range=916-933, strand=  
target 5' UCAAGACGGUCCAAGAGU 3'  
: : ::::: ::::: :::::  
query 3' AACUGUGCCAGGUUCUUA 5'  
query=miR6264, target=R03G\_06635, score=4, range=3200-3216, stran  
target 5' UUG-CACGAUCCAAGAAA 3'  
::: ::::: ::::: :::::  
query 3' AACUGUGCCAGGUUCUUA 5'

```

query=miR6264, target=R03G_00491, score=4, range=640-656, strand=
target 5' UUGACAC-GUCUAGGAAU 3'
: : : : : :
query 3' AACUGUGCCAGGUUCUUA 5'
query=miR6264, target=R03G_00494, score=4, range=640-656, strand=
target 5' UUGACAC-GUCUAGGAAU 3'
: : : : : :
query 3' AACUGUGCCAGGUUCUUA 5'
query=miR6264, target=R03G_10833, score=4, range=252-269, strand=
target 5' GUGGUGCGGUCCAAGAGU 3'
: : : : : :
query 3' AACUGUGCCAGGUUCUUA 5'
query=miR6264, target=R03G_11562, score=4, range=1260-1277, stran
target 5' UUGACAGGUUCCAAGAAU 3'
: : : : : :
query 3' AACUGUGCCAGGUUCUUA 5'
query=miR6264, target=R03G_04559, score=4, range=575-593, strand=
target 5' UUGAUCACUGUCCAAGAGU 3'
: : : : : :
query 3' AACU-GUGCCAGGUUCUUA 5'
query=miR6264, target=R03G_08751, score=4, range=1253-1270, stran
target 5' UGCCAUGGUCCAAGGAU 3'
: : : : : :
query 3' AACUGUGCCAGGUUCUUA 5'
query=miR6264, target=R03G_00574, score=4, range=306-323, strand=
target 5' UUAGUACAGUCCAAGAAU 3'
: : : : : :
query 3' AACUGUGCCAGGUUCUUA 5'
query=miR6264, target=R03G_10152, score=4, range=2664-2682, stran
target 5' CUGAUCACGGUCCAAGAGA 3'
: : : : : :
query 3' AACU-GUGCCAGGUUCUUA 5'
query=miR6264, target=R03G_07538, score=4, range=1495-1511, stran
target 5' UUGACACGGU-CAAGAGC 3'
: : : : : :
query 3' AACUGUGCCAGGUUCUUA 5'
query=miR6264, target=R03G_01480, score=4, range=203-219, strand=
target 5' UUCCCAC-GUCCAAGAAU 3'
: : : : : :
query 3' AACUGUGCCAGGUUCUUA 5'
query=miR6264, target=R03G_04131, score=4, range=1013-1029, stran
target 5' UUGACA-GGUCCAGGAAA 3'
: : : : : :
query 3' AACUGUGCCAGGUUCUUA 5'
query=miR9552b-3p, target=R03G_19000, score=1, range=676-693,

```

```

strand=-1
target 5' GCUAUCGGUUUCUCGCCA 3'
::::::::::::::::::
query 3' CGAUAGCCAGAGAGCGGU 5'
query=miR9552b-3p, target=R03G_19002, score=1, range=676-693,
strand=-1
target 5' GCUAUCGGUUUCUCGCCA 3'
::::::::::::::::::
query 3' CGAUAGCCAGAGAGCGGU 5'
query=miR9552b-3p, target=R03G_01749, score=3, range=187-204, str
target 5' GCCAUCGGUCUCUCGCUC 3'
:: ::::::::::::::.
query 3' CGAUAGCCAGAGAGCGGU 5'
query=miR9552b-3p, target=R03G_08147, score=3, range=380-398, str
target 5' GUUAUCGUGUCUCUCGCCG 3'
:..... ::::::::::::::.
query 3' CGAUAGC-CAGAGAGCGGU 5'
query=miR9552b-3p, target=R03G_15177, score=3, range=174-191,
strand=-1
target 5' GCCUUCGGUUUCUCGCCA 3'
:: ::::::::::::::
query 3' CGAUAGCCAGAGAGCGGU 5'
query=miR9552b-3p, target=R03G_09077, score=3.5, range=1057-1074,
strand=1
target 5' GGUGUUGGUCUCUUGCCA 3'
: :..... ::::::::::::::
query 3' CGAUAGCCAGAGAGCGGU 5'
query=miR9552b-3p, target=R03G_09074, score=3.5, range=1057-1074,
strand=1
target 5' GGUGUUGGUCUCUUGCCA 3'
: :..... ::::::::::::::
query 3' CGAUAGCCAGAGAGCGGU 5'
query=miR9552b-3p, target=R03G_03948, score=4, range=67-84, stran
target 5' GCUAUCGGUCUCUCAUUA 3'
:::::::::::::::::: ..:
query 3' CGAUAGCCAGAGAGCGGU 5'
query=miR9552b-3p, target=R03G_02584, score=4, range=148-165, str
target 5' GCUACCGGUCUCUUGCUC 3'
:::: ::::::::::::::.
query 3' CGAUAGCCAGAGAGCGGU 5'
query=miR9552b-3p, target=R03G_07084, score=4, range=148-165, str
target 5' GCUACCGGUCUCUUGCUU 3'
:::: ::::::::::::::.
query 3' CGAUAGCCAGAGAGCGGU 5'
query=miR9552b-3p, target=R03G_00058, score=4, range=1521-1539,

```

```

strand=1
target 5' UCUGAUCGGUCUCUUGCCC 3'
:: ::::::::::::::
query 3' CGA-UAGCCAGAGAGCGGU 5'
query=miR9552b-3p, target=R03G_14836, score=4, range=85-102, stra
target 5' CCAACCGGUCUUUCGCCA 3'
: : ::::::::::::::
query 3' CGAUAGCCAGAGAGCGGU 5'
query=miR9552b-3p, target=R03G_00174, score=4, range=380-398, str
target 5' GUUACCGUGUCUCUCGCCG 3'
::: : ::::::::::::::
query 3' CGAUAGC-CAGAGAGCGGU 5'
query=miR9552b-3p, target=R03G_12433, score=4, range=3236-3252,
strand=-1
target 5' ACUAUCGGUCUC-CGUCA 3'
:::::::::::: : :::
query 3' CGAUAGCCAGAGAGCGGU 5'
query=miR9552b-3p, target=R03G_05760, score=4, range=745-761,
strand=-1
target 5' GC-AUCUGUCUCUUGCCA 3'
:: : ::::::::::::::
query 3' CGAUAGCCAGAGAGCGGU 5'
query=miR8141, target=R03G_03764, score=0.5, range=502-521, stran
target 5' GCACCACCAACUAGUAUGCA 3'
.::::::::::::
query 3' UGUGGUGGUUGAUCAUACGU 5'
query=miR8141, target=R03G_05431, score=0.5, range=829-848, stran
target 5' GCACCACCAACUAGUAUGCA 3'
.::::::::::::
query 3' UGUGGUGGUUGAUCAUACGU 5'
query=miR8141, target=R03G_05421, score=0.5, range=541-560, stran
target 5' GCACCACCAACUAGUAUGCA 3'
.::::::::::::
query 3' UGUGGUGGUUGAUCAUACGU 5'
query=miR8141, target=R03G_12666, score=0.5, range=502-521, stran
target 5' GCACCACCAACUAGUAUGCA 3'
.::::::::::::
query 3' UGUGGUGGUUGAUCAUACGU 5'
query=miR8141, target=R03G_12954, score=0.5, range=871-890, stran
target 5' GCACCACCAACUAGUAUGCA 3'
.::::::::::::
query 3' UGUGGUGGUUGAUCAUACGU 5'
query=miR8141, target=R03G_12071, score=0.5, range=502-521, stran
target 5' GCACCACCAACUAGUAUGCA 3'
.::::::::::::

```



query 3' UGUGGUGGUUGAUCAUACGU 5'  
query=miR8141, target=R03G\_03776, score=0.5, range=331-350, stran  
target 5' GCACCACCAACUAGUAUGCA 3'  
.....  
query 3' UGUGGUGGUUGAUCAUACGU 5'  
query=miR8141, target=R03G\_14560, score=0.5, range=739-758, stran  
target 5' GCACCACCAACUAGUAUGCA 3'  
.....  
query 3' UGUGGUGGUUGAUCAUACGU 5'  
query=miR8141, target=R03G\_13858, score=0.5, range=502-521, stran  
target 5' GCACCACCAACUAGUAUGCA 3'  
.....  
query 3' UGUGGUGGUUGAUCAUACGU 5'  
query=miR8141, target=R03G\_16729, score=2, range=739-758, strand=  
target 5' ACACCACCAAGUAGUAUGCA 3'  
..... : : : : :  
query 3' UGUGGUGGUUGAUCAUACGU 5'  
query=miR8141, target=R03G\_02713, score=2.5, range=601-620, stran  
target 5' GCACCACCAAGUAGUAUGCA 3'  
..... : : : : :  
query 3' UGUGGUGGUUGAUCAUACGU 5'  
query=miR8141, target=R03G\_08115, score=2.5, range=574-593, stran  
target 5' GCACCACCAAGUAGUAUGCA 3'  
..... : : : : :  
query 3' UGUGGUGGUUGAUCAUACGU 5'  
query=miR8141, target=R03G\_04690, score=2.5, range=871-890, stran  
target 5' GCACCACCAAGUAGUAUGCA 3'  
..... : : : : :  
query 3' UGUGGUGGUUGAUCAUACGU 5'  
query=miR8141, target=R03G\_15135, score=2.5, range=4077-4096,  
strand=-1  
target 5' GCACCACCAAGUAGUAUGCA 3'  
..... : : : : :  
query 3' UGUGGUGGUUGAUCAUACGU 5'  
query=miR8141, target=R03G\_07774, score=4, range=247-266, strand=  
target 5' GCACCAUCAGCUGGUAUGCC 3'  
..... : : : : :  
query 3' UGUGGUGGUUGAUCAUACGU 5'  
query=miR8141, target=R03G\_09734, score=4, range=219-239, strand=  
target 5' GCACCAUGCAACUAGUAUGAA 3'  
..... : : : : :  
query 3' UGUGGUG-GUUGAUCAUACGU 5'  
query=miR8141, target=R03G\_14180, score=4, range=642-662, strand=  
target 5' ACAUCAUCAAUUAGUGAUGCA 3'  
..... : : : : :

query 3' UGUGGUGGUUGAUCA-UACGU 5'  
query=miR902a-5p, target=R03G\_12957, score=0.5, range=327-347,  
strand=1  
target 5' UGAAGAAGCGUGCAUGCAGUG 3'  
:::::::::::::::::::::  
query 3' ACUUCUUCGCACGUACGUCAU 5'  
query=miR902a-5p, target=R03G\_13735, score=1, range=327-347, stra  
target 5' UGAAGAAGCGUGUAUGCAGUA 3'  
:::::::::::::::::::::  
query 3' ACUUCUUCGCACGUACGUCAU 5'  
query=miR902a-5p, target=R03G\_12179, score=1, range=327-347, stra  
target 5' UGAAGAAGCGUGUAUGCAGUA 3'  
:::::::::::::::::::::  
query 3' ACUUCUUCGCACGUACGUCAU 5'  
query=miR902a-5p, target=R03G\_07110, score=1, range=327-347, stra  
target 5' UGAAGAAGCGUGCAUGCAGUU 3'  
:::::::::::::::::::::  
query 3' ACUUCUUCGCACGUACGUCAU 5'  
query=miR902a-5p, target=R03G\_07678, score=1, range=327-347, stra  
target 5' UGAAGAAGCGUGCAUGCAGUU 3'  
:::::::::::::::::::::  
query 3' ACUUCUUCGCACGUACGUCAU 5'  
query=miR902a-5p, target=R03G\_07676, score=1, range=327-347, stra  
target 5' UGAAGAAGCGUGCAUGCAGUU 3'  
:::::::::::::::::::::  
query 3' ACUUCUUCGCACGUACGUCAU 5'  
query=miR902a-5p, target=R03G\_01949, score=1, range=327-347, stra  
target 5' UGAAGAAGCGUGCAUGCAGUU 3'  
:::::::::::::::::::::  
query 3' ACUUCUUCGCACGUACGUCAU 5'  
query=miR902a-5p, target=R03G\_05523, score=1, range=327-347, stra  
target 5' UGAAGAAGCGUGCAUGCAGUU 3'  
:::::::::::::::::::::  
query 3' ACUUCUUCGCACGUACGUCAU 5'  
query=miR902a-5p, target=R03G\_03767, score=1, range=327-347, stra  
target 5' UGAAGAAGCGUGCAUGCAGUU 3'  
:::::::::::::::::::::  
query 3' ACUUCUUCGCACGUACGUCAU 5'  
query=miR902a-5p, target=R03G\_01968, score=1, range=327-347, stra  
target 5' UGAAGAAGCGUGCAUGCAGUU 3'  
:::::::::::::::::::::  
query 3' ACUUCUUCGCACGUACGUCAU 5'  
query=miR902a-5p, target=R03G\_17380, score=1, range=327-347, stra  
target 5' UGAAGAAGCGUGCAUGCAGUU 3'  
:::::::::::::::::::::

query 3' ACUUCUUCGCACGUACGUCAU 5'  
query=miR902a-5p, target=R03G\_10525, score=1, range=327-347, strand=1  
target 5' UGAAGAAGCGUGCAUGCAGUU 3'  
.....  
query 3' ACUUCUUCGCACGUACGUCAU 5'  
query=miR902a-5p, target=R03G\_10531, score=1, range=327-347, strand=1  
target 5' UGAAGAAGCGUGCAUGCAGUU 3'  
.....  
query 3' ACUUCUUCGCACGUACGUCAU 5'  
query=miR902a-5p, target=R03G\_11953, score=1, range=204-224, strand=1  
target 5' UGAAGAAGCGUGCAUGCAGUU 3'  
.....  
query 3' ACUUCUUCGCACGUACGUCAU 5'  
query=miR902a-5p, target=R03G\_07868, score=1, range=327-347, strand=1  
target 5' UGAAGAAGCGUGCAUGCAGUU 3'  
.....  
query 3' ACUUCUUCGCACGUACGUCAU 5'  
query=miR902a-5p, target=R03G\_10545, score=1, range=327-347, strand=1  
target 5' UGAAGAAGCGUGCAUGCAGUU 3'  
.....  
query 3' ACUUCUUCGCACGUACGUCAU 5'  
query=miR902a-5p, target=R03G\_04676, score=2, range=327-347, strand=1  
target 5' UGAAGAAGCGUGUAUGCAGUU 3'  
.....  
query 3' ACUUCUUCGCACGUACGUCAU 5'  
query=miR902a-5p, target=R03G\_12005, score=2, range=327-347, strand=1  
target 5' UGAAGAAGCGUGUAUGCAGUU 3'  
.....  
query 3' ACUUCUUCGCACGUACGUCAU 5'  
query=miR902a-5p, target=R03G\_15157, score=2, range=327-347, strand=1  
target 5' UGAAGAAGCGUGUAUGCAGUU 3'  
.....  
query 3' ACUUCUUCGCACGUACGUCAU 5'  
query=miR902a-5p, target=R03G\_14637, score=2, range=327-347, strand=1  
target 5' UGAAGAAGCGUGUAUGCAGUU 3'  
.....  
query 3' ACUUCUUCGCACGUACGUCAU 5'  
query=miR774b-5p, target=R03G\_14626, score=0, range=1870-1892, strand=1  
target 5' GUCACUCCAAUAUGCAUCUUCA 3'  
.....  
query 3' CAGUGAGGUUUUAUCGUAGAAGU 5'  
query=miR774b-5p, target=R03G\_16138, score=0, range=1870-1892, strand=1  
target 5' GUCACUCCAAUAUGCAUCUUCA 3'

query 3' CAGUGAGGUUUUACGUAGAAGU 5'  
query=miR774b-5p, target=R03G\_12072, score=0, range=1870-1892,  
strand=1  
target 5' GUCACUCCAAAUAUGCAUCUUCA 3'  
query 3' CAGUGAGGUUUUACGUAGAAGU 5'  
query=miR774b-5p, target=R03G\_01740, score=0, range=1834-1856,  
strand=1  
target 5' GUCACUCCAAAUAUGCAUCUUCA 3'  
query 3' CAGUGAGGUUUUACGUAGAAGU 5'  
query=miR774b-5p, target=R03G\_05958, score=0, range=1834-1856,  
strand=1  
target 5' GUCACUCCAAAUAUGCAUCUUCA 3'  
query 3' CAGUGAGGUUUUACGUAGAAGU 5'  
query=miR774b-5p, target=R03G\_17441, score=0, range=1597-1619,  
strand=1  
target 5' GUCACUCCAAAUAUGCAUCUUCA 3'  
query 3' CAGUGAGGUUUUACGUAGAAGU 5'  
query=miR774b-5p, target=R03G\_10522, score=0, range=1834-1856,  
strand=1  
target 5' GUCACUCCAAAUAUGCAUCUUCA 3'  
query 3' CAGUGAGGUUUUACGUAGAAGU 5'  
query=miR774b-5p, target=R03G\_07294, score=0, range=1471-1493,  
strand=1  
target 5' GUCACUCCAAAUAUGCAUCUUCA 3'  
query 3' CAGUGAGGUUUUACGUAGAAGU 5'  
query=miR774b-5p, target=R03G\_04785, score=0, range=1834-1856,  
strand=1  
target 5' GUCACUCCAAAUAUGCAUCUUCA 3'  
query 3' CAGUGAGGUUUUACGUAGAAGU 5'  
query=miR774b-5p, target=R03G\_01954, score=0, range=820-842, str  
target 5' GUCACUCCAAAUAUGCAUCUUCA 3'  
query 3' CAGUGAGGUUUUACGUAGAAGU 5'  
query=miR774b-5p, target=R03G\_13149, score=0, range=67-89, strand  
target 5' GUCACUCCAAAUAUGCAUCUUCA 3'  
query 3' CAGUGAGGUUUUACGUAGAAGU 5'

query=miR774b-5p, target=R03G\_17385, score=0.5, range=1870-1892,  
strand=1  
target 5' GUUACUCCAAAUAUGCAUCUUCA 3'  
.....  
query 3' CAGUGAGGUUUUAUCGUAGAAGU 5'

query=miR774b-5p, target=R03G\_07686, score=0.5, range=1870-1892,  
strand=1  
target 5' GUUACUCCAAAUAUGCAUCUUCA 3'  
.....  
query 3' CAGUGAGGUUUUAUCGUAGAAGU 5'

query=miR774b-5p, target=R03G\_12009, score=0.5, range=1870-1892,  
strand=1  
target 5' GUUACUCCAAAUAUGCAUCUUCA 3'  
.....  
query 3' CAGUGAGGUUUUAUCGUAGAAGU 5'

query=miR774b-5p, target=R03G\_11771, score=0.5, range=1870-1892,  
strand=1  
target 5' GUUACUCCAAAUAUGCAUCUUCA 3'  
.....  
query 3' CAGUGAGGUUUUAUCGUAGAAGU 5'

query=miR774b-5p, target=R03G\_17358, score=0.5, range=1870-1892,  
strand=1  
target 5' GUUACUCCAAAUAUGCAUCUUCA 3'  
.....  
query 3' CAGUGAGGUUUUAUCGUAGAAGU 5'

query=miR774b-5p, target=R03G\_09940, score=0.5, range=1870-1892,  
strand=1  
target 5' GUUACUCCAAAUAUGCAUCUUCA 3'  
.....  
query 3' CAGUGAGGUUUUAUCGUAGAAGU 5'

query=miR774b-5p, target=R03G\_12169, score=0.5, range=1870-1892,  
strand=1  
target 5' GUUACUCCAAAUAUGCAUCUUCA 3'  
.....  
query 3' CAGUGAGGUUUUAUCGUAGAAGU 5'

query=miR774b-5p, target=R03G\_14710, score=0.5, range=1870-1892,  
strand=1  
target 5' GUUACUCCAAAUAUGCAUCUUCA 3'  
.....  
query 3' CAGUGAGGUUUUAUCGUAGAAGU 5'

query=miR774b-5p, target=R03G\_07976, score=0.5, range=1867-1889,  
strand=1  
target 5' GUUACUCCAAAUAUGCAUCUUCA 3'  
.....  
query 3' CAGUGAGGUUUUAUCGUAGAAGU 5'

query=miR774b-5p, target=R03G\_10725, score=0.5, range=1834-1856,  
strand=1  
target 5' GUUACUCCAAAUAUGCAUCUUCA 3'  
.....  
query 3' CAGUGAGGUUUUAUCGUAGAAGU 5'

query=miR774b-5p, target=R03G\_01309, score=0.5, range=1819-1841,  
strand=1  
target 5' GUUACUCCAAAUAUGCAUCUUCA 3'  
.....  
query 3' CAGUGAGGUUUUAUCGUAGAAGU 5'

query=miR774b-5p, target=R03G\_13747, score=0.5, range=1870-1892,  
strand=1  
target 5' GUUACUCCAAAUAUGCAUCUUCA 3'  
.....  
query 3' CAGUGAGGUUUUAUCGUAGAAGU 5'

query=miR774b-5p, target=R03G\_11404, score=0.5, range=1870-1892,  
strand=1  
target 5' GUUACUCCAAAUAUGCAUCUUCA 3'  
.....  
query 3' CAGUGAGGUUUUAUCGUAGAAGU 5'

query=miR774b-5p, target=R03G\_16736, score=0.5, range=4-26, stran  
target 5' GUUACUCCAAAUAUGCAUCUUCA 3'  
.....  
query 3' CAGUGAGGUUUUAUCGUAGAAGU 5'

query=miR774b-5p, target=R03G\_03552, score=0.5, range=4-26, stran  
target 5' GUUACUCCAAAUAUGCAUCUUCA 3'  
.....  
query 3' CAGUGAGGUUUUAUCGUAGAAGU 5'

query=miR774b-5p, target=R03G\_07128, score=0.5, range=388-410,  
strand=1  
target 5' GUUACUCCAAAUAUGCAUCUUCA 3'  
.....  
query 3' CAGUGAGGUUUUAUCGUAGAAGU 5'

query=miR774b-5p, target=R03G\_03580, score=1, range=1795-1817,  
strand=1  
target 5' AUCACUCCAAAUAUGCAUCUUCA 3'  
.....  
query 3' CAGUGAGGUUUUAUCGUAGAAGU 5'

query=miR774b-5p, target=R03G\_11531, score=1, range=1363-1385,  
strand=1  
target 5' AUCACUCCAAAUAUGCAUCUUCA 3'  
.....  
query 3' CAGUGAGGUUUUAUCGUAGAAGU 5'

query=miR774b-5p, target=R03G\_03589, score=1, range=1795-1817,  
strand=1

target 5' AUCACUCCAAAUAUGCAUCUUCA 3'  
 ::::::::::::::::::::::::::::

query 3' CAGUGAGGUUUUAUACGUAGAAGU 5'  
 query=miR774b-5p, target=R03G\_15580, score=1, range=1834-1856,  
 strand=1

target 5' AUCACUCCAAAUAUGCAUCUUCA 3'  
 ::::::::::::::::::::::::::::

query 3' CAGUGAGGUUUUAUACGUAGAAGU 5'  
 query=miR774b-5p, target=R03G\_06430, score=1.5, range=1834-1856,  
 strand=1

target 5' GUUACUCCAAAUAUGCAUUUUCA 3'  
 ::::::::::::::::::::::::::::

query 3' CAGUGAGGUUUUAUACGUAGAAGU 5'  
 query=miR774b-5p, target=R03G\_01207, score=2.5, range=1687-1709,  
 strand=1

target 5' GGUACUCCAAAUAUGCAUUUUCA 3'  
 : ::::::::::::::::::::::::::::

query 3' CAGUGAGGUUUUAUACGUAGAAGU 5'  
 query=miR774b-5p, target=R03G\_08815, score=4, range=1695-1716,  
 strand=-1

target 5' GUUA-UUGAUUAUGCAUCUUCA 3'  
 ::. :. : ::::::::::::::::::::

query 3' CAGUGAGGUUUUAUACGUAGAAGU 5'  
 query=miR5741a, target=R03G\_07101, score=3.5, range=52-72, strand

target 5' AAGUUGAUCAAUUUGCUCUG 3'  
 ::.. ::::::::::::::::::::.

query 3' UUUGUGUAGUAAAACGAGGAU 5'  
 query=miR5741a, target=R03G\_07788, score=4, range=1520-1540, str

target 5' AACACUUCAAUUUGCUCUCA 3'  
 :::::: ::::::::::::::. :

query 3' UUUGUGUAGUAAAACGAGGAU 5'  
 query=miR5741a, target=R03G\_05444, score=4, range=107-127, strand

target 5' AAUGCUUCAAUUUGCUGCUA 3'  
 ::...: :::::::::::::: :::

query 3' UUUGUGUAGUAAAACGAGGAU 5'  
 query=miR9653a-3p, target=R03G\_10862, score=0, range=329-347, str

target 5' GGCCAGCCCAAAGUCCCAA 3'  
 ::::::::::::::::::::::::::::

query 3' CCGGUCGGGUUUCAGGGUU 5'  
 query=miR9653a-3p, target=R03G\_00677, score=1, range=359-377, str

target 5' GGCCAGCCCAAAGUCCCGA 3'  
 ::::::::::::::::::::::::::::

query 3' CCGGUCGGGUUUCAGGGUU 5'  
 query=miR9653a-3p, target=R03G\_03605, score=1, range=1259-1277,  
 strand=1

```

target 5' GGCCAGCCCAAAGUCCCGA 3'
:~::~:
query 3' CCGGUCGGGUUUCAGGGUU 5'
query=miR9653a-3p, target=R03G_05950, score=1, range=275-293, str
target 5' GGCCAGCCCAAAGUCCCGA 3'
:~::~:
query 3' CCGGUCGGGUUUCAGGGUU 5'
query=miR9653a-3p, target=R03G_16715, score=1, range=257-275, str
target 5' GGCCAGCCCAAAGUCCCGA 3'
:~::~:
query 3' CCGGUCGGGUUUCAGGGUU 5'
query=miR9653a-3p, target=R03G_17406, score=1, range=158-176, str
target 5' GGCCAGCCCAAAGUCCCGA 3'
:~::~:
query 3' CCGGUCGGGUUUCAGGGUU 5'
query=miR9653a-3p, target=R03G_01588, score=1, range=137-155, str
target 5' GGCCAGCCCAAAGUCCCGA 3'
:~::~:
query 3' CCGGUCGGGUUUCAGGGUU 5'
query=miR9653a-3p, target=R03G_00690, score=2, range=746-764, str
target 5' GGCCAGCUCAAAGUCCCGA 3'
:~::~:
query 3' CCGGUCGGGUUUCAGGGUU 5'
query=miR9653a-3p, target=R03G_01925, score=2, range=806-824, str
target 5' GGCCAGCUCAAAGUCCCGA 3'
:~::~:
query 3' CCGGUCGGGUUUCAGGGUU 5'
query=miR9653a-3p, target=R03G_07024, score=2, range=806-824, str
target 5' GGCCAGCUCAAAGUCCCGA 3'
:~::~:
query 3' CCGGUCGGGUUUCAGGGUU 5'
query=miR9653a-3p, target=R03G_07121, score=2, range=806-824, str
target 5' GGCCAGCUCAAAGUCCCGA 3'
:~::~:
query 3' CCGGUCGGGUUUCAGGGUU 5'
query=miR9653a-3p, target=R03G_12525, score=2, range=728-746, str
target 5' GGCCAGCUCAAAGUCCCGA 3'
:~::~:
query 3' CCGGUCGGGUUUCAGGGUU 5'
query=miR9653a-3p, target=R03G_04786, score=2, range=374-392, str
target 5' GGCCAGCUCAAAGUCCCGA 3'
:~::~:
query 3' CCGGUCGGGUUUCAGGGUU 5'
query=miR9653a-3p, target=R03G_09955, score=2, range=491-509, str
target 5' GGCCAGCUCAAAGUCCCGA 3'

```



query 3' CCGGUCGGGUUUCAGGGUU 5'  
query=miR9653a-3p, target=R03G\_02700, score=2, range=491-509, str  
target 5' GGCCAGCUCAAAGUCCCGA 3'

query 3' CCGGUCGGGUUUCAGGGUU 5'  
query=miR9653a-3p, target=R03G\_03570, score=2, range=491-509, str  
target 5' GGCCAGCUCAAAGUCCCGA 3'

query 3' CCGGUCGGGUUUCAGGGUU 5'  
query=miR9653a-3p, target=R03G\_11273, score=2, range=137-155, str  
target 5' GGCCAGCUCAAAGUCCCGA 3'

query 3' CCGGUCGGGUUUCAGGGUU 5'  
query=miR9653a-3p, target=R03G\_16905, score=2, range=614-632, str  
target 5' GGCCAGCUCAAAGUCCCGA 3'

query 3' CCGGUCGGGUUUCAGGGUU 5'  
query=miR9653a-3p, target=R03G\_04661, score=2, range=437-455, str  
target 5' GGCCUGCCCAAAGUCCCGA 3'

query 3' CCGGUCGGGUUUCAGGGUU 5'  
query=miR9653a-3p, target=R03G\_13276, score=3, range=179-197, str  
target 5' GGCCAGCUCAAAGUCCUGA 3'

query 3' CCGGUCGGGUUUCAGGGUU 5'  
query=miR9653a-3p, target=R03G\_16118, score=3, range=65-83, stran  
target 5' GGCCAGCUCAAAGUCCUGA 3'

query 3' CCGGUCGGGUUUCAGGGUU 5'  
query=miR9653a-3p, target=R03G\_10537, score=3, range=620-638, str  
target 5' GGCCAGCUCAAAGUCCUGA 3'

query 3' CCGGUCGGGUUUCAGGGUU 5'  
query=miR9653a-3p, target=R03G\_07295, score=3, range=629-647, str  
target 5' GGCCAGCUCAAAGUCCUGA 3'

query 3' CCGGUCGGGUUUCAGGGUU 5'  
query=miR9653a-3p, target=R03G\_12174, score=3, range=122-140, str  
target 5' GGCCAGCUCAAAGUCCUGA 3'

query 3' CCGGUCGGGUUUCAGGGUU 5'  
query=miR9653a-3p, target=R03G\_17213, score=3, range=122-140, str  
target 5' GGCCAGCUCAAAGUCCUGA 3'

query 3' CCGGUCGGGUUUCAGGGUU 5'  
query=miR9653a-3p, target=R03G\_08835, score=3, range=107-125, str  
target 5' GGCCAGCUCAAAGUCCUGA 3'  
.....:  
query 3' CCGGUCGGGUUUCAGGGUU 5'  
query=miR9653a-3p, target=R03G\_10528, score=3, range=122-140, str  
target 5' GGCCAGCUCAAAGUCCUGA 3'  
.....:  
query 3' CCGGUCGGGUUUCAGGGUU 5'  
query=miR9653a-3p, target=R03G\_11263, score=3, range=122-140, str  
target 5' GGCCAGCUCAAAGUCCUGA 3'  
.....:  
query 3' CCGGUCGGGUUUCAGGGUU 5'  
query=miR9653a-3p, target=R03G\_12013, score=3, range=122-140, str  
target 5' GGCCAGCUCAAAGUCCUGA 3'  
.....:  
query 3' CCGGUCGGGUUUCAGGGUU 5'  
query=miR9653a-3p, target=R03G\_07119, score=3, range=122-140, str  
target 5' GGCCAGCUCAAAGUCCUGA 3'  
.....:  
query 3' CCGGUCGGGUUUCAGGGUU 5'  
query=miR9653a-3p, target=R03G\_10742, score=3, range=122-140, str  
target 5' GGCCAGCUCAAAGUCCUGA 3'  
.....:  
query 3' CCGGUCGGGUUUCAGGGUU 5'  
query=miR9653a-3p, target=R03G\_11528, score=3, range=122-140, str  
target 5' GGCCAGCUCAAAGUCCUGA 3'  
.....:  
query 3' CCGGUCGGGUUUCAGGGUU 5'  
query=miR9653a-3p, target=R03G\_17409, score=3, range=797-815, str  
target 5' GGCCAGCUCAAAGUCCUGA 3'  
.....:  
query 3' CCGGUCGGGUUUCAGGGUU 5'  
query=miR9653a-3p, target=R03G\_01951, score=3, range=797-815, str  
target 5' GGCCAGCUCAAAGUCCUGA 3'  
.....:  
query 3' CCGGUCGGGUUUCAGGGUU 5'  
query=miR9653a-3p, target=R03G\_01194, score=3, range=797-815, str  
target 5' GGCCAGCUCAAAGUCCUGA 3'  
.....:  
query 3' CCGGUCGGGUUUCAGGGUU 5'  
query=miR9653a-3p, target=R03G\_09199, score=3, range=797-815, str  
target 5' GGCCAGCUCAAAGUCCUGA 3'  
.....:  
query 3' CCGGUCGGGUUUCAGGGUU 5'

query=miR9653a-3p, target=R03G\_05916, score=3, range=797-815, str  
target 5' GGCCAGCUCAAAGUCCUGA 3'  
:~::~  
query 3' CCGGUCGGGUUUCAGGGUU 5'  
query=miR9653a-3p, target=R03G\_15873, score=3, range=797-815, str  
target 5' GGCCAGCUCAAAGUCCUGA 3'  
:~::~  
query 3' CCGGUCGGGUUUCAGGGUU 5'  
query=miR9653a-3p, target=R03G\_12526, score=3, range=797-815, str  
target 5' GGCCAGCUCAAAGUCCUGA 3'  
:~::~  
query 3' CCGGUCGGGUUUCAGGGUU 5'  
query=miR9653a-3p, target=R03G\_13447, score=3, range=797-815, str  
target 5' GGCCAGCUCAAAGUCCUGA 3'  
:~::~  
query 3' CCGGUCGGGUUUCAGGGUU 5'  
query=miR9653a-3p, target=R03G\_03987, score=3, range=797-815, str  
target 5' GGCCAGCUCAAAGUCCUGA 3'  
:~::~  
query 3' CCGGUCGGGUUUCAGGGUU 5'  
query=miR9653a-3p, target=R03G\_11244, score=3, range=797-815, str  
target 5' GGCCAGCUCAAAGUCCUGA 3'  
:~::~  
query 3' CCGGUCGGGUUUCAGGGUU 5'  
query=miR9653a-3p, target=R03G\_10044, score=3, range=797-815, str  
target 5' GGCCAGCUCAAAGUCCUGA 3'  
:~::~  
query 3' CCGGUCGGGUUUCAGGGUU 5'  
query=miR9653a-3p, target=R03G\_01313, score=3, range=797-815, str  
target 5' GGCCAGCUCAAAGUCCUGA 3'  
:~::~  
query 3' CCGGUCGGGUUUCAGGGUU 5'  
query=miR9653a-3p, target=R03G\_10720, score=3, range=797-815, str  
target 5' GGCCAGCUCAAAGUCCUGA 3'  
:~::~  
query 3' CCGGUCGGGUUUCAGGGUU 5'  
query=miR9653a-3p, target=R03G\_01950, score=3, range=797-815, str  
target 5' GGCCAGCUCAAAGUCCUGA 3'  
:~::~  
query 3' CCGGUCGGGUUUCAGGGUU 5'  
query=miR9653a-3p, target=R03G\_15154, score=3, range=797-815, str  
target 5' GGCCAGCUCAAAGUCCUGA 3'  
:~::~  
query 3' CCGGUCGGGUUUCAGGGUU 5'  
query=miR9653a-3p, target=R03G\_03558, score=3, range=797-815, str

```

target 5' GGCCAGCUCAAAGUCCUGA 3'
::::::::::::::::::::::::::
query 3' CCGGUCGGGUUUCAGGGUU 5'
query=miR9653a-3p, target=R03G_07994, score=3, range=797-815, str
target 5' GGCCAGCUCAAAGUCCUGA 3'
::::::::::::::::::::::::::
query 3' CCGGUCGGGUUUCAGGGUU 5'
query=miR9653a-3p, target=R03G_07683, score=3, range=797-815, str
target 5' GGCCAGCUCAAAGUCCUGA 3'
::::::::::::::::::::::::::
query 3' CCGGUCGGGUUUCAGGGUU 5'
query=miR9653a-3p, target=R03G_09924, score=3, range=797-815, str
target 5' GGCCAGCUCAAAGUCCUGA 3'
::::::::::::::::::::::::::
query 3' CCGGUCGGGUUUCAGGGUU 5'
query=miR9653a-3p, target=R03G_11948, score=3, range=797-815, str
target 5' GGCCAGCUCAAAGUCCUGA 3'
::::::::::::::::::::::::::
query 3' CCGGUCGGGUUUCAGGGUU 5'
query=miR9653a-3p, target=R03G_01735, score=3, range=797-815, str
target 5' GGCCAGCUCAAAGUCCUGA 3'
::::::::::::::::::::::::::
query 3' CCGGUCGGGUUUCAGGGUU 5'
query=miR9653a-3p, target=R03G_13706, score=3, range=755-773, str
target 5' GGCCAGCUCAAAGUCCUGA 3'
::::::::::::::::::::::::::
query 3' CCGGUCGGGUUUCAGGGUU 5'
query=miR9653a-3p, target=R03G_17211, score=3, range=797-815, str
target 5' GGCCAGCUCAAAGUCCUGA 3'
::::::::::::::::::::::::::
query 3' CCGGUCGGGUUUCAGGGUU 5'
query=miR9653a-3p, target=R03G_03617, score=3, range=797-815, str
target 5' GGCCAGCUCAAAGUCCUGA 3'
::::::::::::::::::::::::::
query 3' CCGGUCGGGUUUCAGGGUU 5'
query=miR9653a-3p, target=R03G_10805, score=3, range=806-824, str
target 5' GGCCAGCCCAAUUCCTCGA 3'
:::::::::::::::::: :
query 3' CCGGUCGGGUUUCAGGGUU 5'
query=miR9653a-3p, target=R03G_01587, score=3, range=623-641, str
target 5' GGCCUGCUCUCAAAGUCCCGA 3'
:::: :
query 3' CCGGUCGGGUUUCAGGGUU 5'
query=miR9653a-3p, target=R03G_17361, score=3, range=374-392, str
target 5' GGCCUGCUCUCAAAGUCCCGA 3'

```

:::: :::::::::::::::  
query 3' CCGGUCGGGUUUCAGGGUU 5'  
query=miR9653a-3p, target=R03G\_08658, score=3, range=614-632, str  
target 5' GGCCUGCUCAAAGUCCCGA 3'  
:::: :::::::::::::::  
query 3' CCGGUCGGGUUUCAGGGUU 5'  
query=miR9653a-3p, target=R03G\_14989, score=3, range=653-671, str  
target 5' GGCCUGCUCAAAGUCCCGA 3'  
:::: :::::::::::::::  
query 3' CCGGUCGGGUUUCAGGGUU 5'  
query=miR9653a-3p, target=R03G\_11966, score=3, range=797-815, str  
target 5' GGCCAUCCCAAAGUCCUGA 3'  
::::: :::::::::::::::  
query 3' CCGGUCGGGUUUCAGGGUU 5'  
query=miR9653a-3p, target=R03G\_13857, score=3, range=437-455, str  
target 5' GGCCUGCUCAAAGUCCCGA 3'  
::::: :::::::::::::::  
query 3' CCGGUCGGGUUUCAGGGUU 5'  
query=miR9653a-3p, target=R03G\_05959, score=3, range=797-815, str  
target 5' GGCCAUCCCAAAGUCCUGA 3'  
::::: :::::::::::::::  
query 3' CCGGUCGGGUUUCAGGGUU 5'  
query=miR9653a-3p, target=R03G\_05953, score=3, range=797-815, str  
target 5' GGCCAUCCCAAAGUCCUGA 3'  
::::: :::::::::::::::  
query 3' CCGGUCGGGUUUCAGGGUU 5'  
query=miR9653a-3p, target=R03G\_17449, score=3, range=797-815, str  
target 5' GGCCAUCCCAAAGUCCUGA 3'  
::::: :::::::::::::::  
query 3' CCGGUCGGGUUUCAGGGUU 5'  
query=miR9653a-3p, target=R03G\_05921, score=3, range=797-815, str  
target 5' GGCCAUCCCAAAGUCCUGA 3'  
::::: :::::::::::::::  
query 3' CCGGUCGGGUUUCAGGGUU 5'  
query=miR9653a-3p, target=R03G\_00256, score=3, range=797-815, str  
target 5' GGCCAUCCCAAAGUCCUGA 3'  
::::: :::::::::::::::  
query 3' CCGGUCGGGUUUCAGGGUU 5'  
query=miR9653a-3p, target=R03G\_05267, score=3, range=797-815, str  
target 5' GGCCAUCCCAAAGUCCUGA 3'  
::::: :::::::::::::::  
query 3' CCGGUCGGGUUUCAGGGUU 5'  
query=miR9653a-3p, target=R03G\_14361, score=3, range=797-815, str  
target 5' GGCCAUCCCAAAGUCCUGA 3'  
::::: :::::::::::::::

```

query 3' CCGGUCGGGUUUCAGGGUU 5'
query=miR9653a-3p, target=R03G_09967, score=3, range=797-815, str
target 5' GGCCAUCCCAAAGUCCUGA 3'
.....:
query 3' CCGGUCGGGUUUCAGGGUU 5'
query=miR9653a-3p, target=R03G_07860, score=3, range=797-815, str
target 5' GGCCAUCCCAAAGUCCUGA 3'
.....:
query 3' CCGGUCGGGUUUCAGGGUU 5'
query=miR9653a-3p, target=R03G_17069, score=3, range=662-680, str
target 5' GGCCAUCCCAAAGUCCUGA 3'
.....:
query 3' CCGGUCGGGUUUCAGGGUU 5'
query=miR9653a-3p, target=R03G_14568, score=3, range=797-815, str
target 5' GGCCAUCCCAAAGUCCUGA 3'
.....:
query 3' CCGGUCGGGUUUCAGGGUU 5'
query=miR9653a-3p, target=R03G_12377, score=3, range=812-830,
strand=-1
target 5' GAUCGGCCCGAAGUCCCAA 3'
: .....:
query 3' CCGGUCGGGUUUCAGGGUU 5'
query=miR9653a-3p, target=R03G_10729, score=3.5, range=797-815,
strand=1
target 5' GGCUAUCCCAAAGUCCUGA 3'
.....:
query 3' CCGGUCGGGUUUCAGGGUU 5'
query=miR9653a-3p, target=R03G_07651, score=3.5, range=5193-5211,
strand=1
target 5' UGGUAGCUCAAAGUCCCAA 3'
: .....:
query 3' CCGGUCGGGUUUCAGGGUU 5'
query=miR9653a-3p, target=R03G_05737, score=3.5, range=390-407,
strand=-1
target 5' GGAUAG-CCAAAGUCCCAA 3'
:: .:: .....:
query 3' CCGGUCGGGUUUCAGGGUU 5'
query=miR9653a-3p, target=R03G_16377, score=4, range=122-140, str
target 5' GGCCAGCUCAAAGUUCUGA 3'
.....:
query 3' CCGGUCGGGUUUCAGGGUU 5'
query=miR9653a-3p, target=R03G_16548, score=4, range=452-470, str
target 5' UGCCAGCUCAAAGUCCUGA 3'
.....:
query 3' CCGGUCGGGUUUCAGGGUU 5'

```

query=miR9653a-3p, target=R03G\_12186, score=4, range=806-824, str  
target 5' GGCCAGCUCAAAGUCCAGA 3'  
: :  
query 3' CCGGUCGGGUUUCAGGGUU 5'  
query=miR9653a-3p, target=R03G\_03599, score=4, range=806-824, str  
target 5' GGCCAGCUCAAAAUCCCGA 3'  
: : : : :  
query 3' CCGGUCGGGUUUCAGGGUU 5'  
query=miR9653a-3p, target=R03G\_12196, score=4, range=728-746, str  
target 5' GGCCAGCUCAAAGUCCAGA 3'  
: :  
query 3' CCGGUCGGGUUUCAGGGUU 5'  
query=miR9653a-3p, target=R03G\_14620, score=4, range=242-260, str  
target 5' GGCCUGCUCAAAGUCCUGA 3'  
: : : : : : : : : : : :  
query 3' CCGGUCGGGUUUCAGGGUU 5'  
query=miR9653a-3p, target=R03G\_14987, score=4, range=461-479, str  
target 5' GGCCUGCUCAAAGUCCUGA 3'  
: : : : : : : : : : : :  
query 3' CCGGUCGGGUUUCAGGGUU 5'  
query=miR9653a-3p, target=R03G\_06721, score=4, range=611-629, str  
target 5' GGCCUGCUCAAAGUCCUGA 3'  
: : : : : : : : : : : :  
query 3' CCGGUCGGGUUUCAGGGUU 5'  
query=miR9653a-3p, target=R03G\_03797, score=4, range=302-320, str  
target 5' GGCCUGCUCAAAGUCCUGA 3'  
: : : : : : : : : : : :  
query 3' CCGGUCGGGUUUCAGGGUU 5'  
query=miR9653a-3p, target=R03G\_17293, score=4, range=614-632, str  
target 5' GGCCUGCUCAAAGUCCUGA 3'  
: : : : : : : : : : : :  
query 3' CCGGUCGGGUUUCAGGGUU 5'  
query=miR9653a-3p, target=R03G\_04200, score=4, range=614-632, str  
target 5' GGCCUGCUCAAAGUCCUGA 3'  
: : : : : : : : : : : :  
query 3' CCGGUCGGGUUUCAGGGUU 5'  
query=miR9653a-3p, target=R03G\_17436, score=4, range=614-632, str  
target 5' GGCCUGCUCAAAGUCCUGA 3'  
: : : : : : : : : : : :  
query 3' CCGGUCGGGUUUCAGGGUU 5'  
query=miR9653a-3p, target=R03G\_04654, score=4, range=614-632, str  
target 5' GGCCUGCUCAAAGUCCUGA 3'  
: : : : : : : : : : : :  
query 3' CCGGUCGGGUUUCAGGGUU 5'  
query=miR9653a-3p, target=R03G\_15672, score=4, range=614-632, str

target 5' GGCCUGCUCAAAGUCCUGA 3'  
:::: :::::::::::::::  
query 3' CCGGUCGGGUUUCAGGGUU 5'  
query=miR9653a-3p, target=R03G\_11405, score=4, range=614-632, str  
target 5' GGCCUGCUCAAAGUCCUGA 3'  
:::: :::::::::::::::  
query 3' CCGGUCGGGUUUCAGGGUU 5'  
query=miR9653a-3p, target=R03G\_07689, score=4, range=614-632, str  
target 5' GGCCUGCUCAAAGUCCUGA 3'  
:::: :::::::::::::::  
query 3' CCGGUCGGGUUUCAGGGUU 5'  
query=miR9653a-3p, target=R03G\_07302, score=4, range=614-632, str  
target 5' GGCCUGCUCAAAGUCCUGA 3'  
:::: :::::::::::::::  
query 3' CCGGUCGGGUUUCAGGGUU 5'  
query=miR9653a-3p, target=R03G\_10224, score=4, range=614-632, str  
target 5' GGCCUGCUCAAAGUCCUGA 3'  
:::: :::::::::::::::  
query 3' CCGGUCGGGUUUCAGGGUU 5'  
query=miR9653a-3p, target=R03G\_00247, score=4, range=614-632, str  
target 5' GGCCUGCUCAAAGUCCUGA 3'  
:::: :::::::::::::::  
query 3' CCGGUCGGGUUUCAGGGUU 5'  
query=miR9653a-3p, target=R03G\_12670, score=4, range=614-632, str  
target 5' GGCCUGCUCAAAGUCCUGA 3'  
:::: :::::::::::::::  
query 3' CCGGUCGGGUUUCAGGGUU 5'  
query=miR9653a-3p, target=R03G\_09944, score=4, range=614-632, str  
target 5' GGCCUGCUCAAAGUCCUGA 3'  
:::: :::::::::::::::  
query 3' CCGGUCGGGUUUCAGGGUU 5'  
query=miR9653a-3p, target=R03G\_03785, score=4, range=419-437, str  
target 5' GGCCUGCUCAAAGUCCUGA 3'  
:::: :::::::::::::::  
query 3' CCGGUCGGGUUUCAGGGUU 5'  
query=miR9653a-3p, target=R03G\_17204, score=4, range=677-695, str  
target 5' GGCCUGCUCAAAGUCCUGA 3'  
:::: :::::::::::::::  
query 3' CCGGUCGGGUUUCAGGGUU 5'  
query=miR9653a-3p, target=R03G\_08649, score=4, range=559-577, str  
target 5' GGCCUGCUCAAAGUCCUGA 3'  
:::: :::::::::::::::  
query 3' CCGGUCGGGUUUCAGGGUU 5'  
query=miR9653a-3p, target=R03G\_04207, score=4, range=797-815, str  
target 5' GGCCAUCCCAAAGUUCUGA 3'



::::: :::::::::::::::  
query 3' CCGGUCGGGUUUCAGGGUU 5'  
query=miR9653a-3p, target=R03G\_10226, score=4, range=614-632, str  
target 5' GGCCUGCUCAAAGUCCUGA 3'  
::::: :::::::::::::::  
query 3' CCGGUCGGGUUUCAGGGUU 5'  
query=miR9653a-3p, target=R03G\_12082, score=4, range=692-710, str  
target 5' GGCCUGCUCAAAGUCCUGA 3'  
::::: :::::::::::::::  
query 3' CCGGUCGGGUUUCAGGGUU 5'  
query=miR9653a-3p, target=R03G\_14772, score=4, range=692-710, str  
target 5' GGCCUGCUCAAAGUCCUGA 3'  
::::: :::::::::::::::  
query 3' CCGGUCGGGUUUCAGGGUU 5'  
query=miR9653a-3p, target=R03G\_14972, score=4, range=728-746, str  
target 5' GGCCACCACAAAGUCCCGA 3'  
::::: : :::::::::::::::  
query 3' CCGGUCGGGUUUCAGGGUU 5'  
query=miR9653a-3p, target=R03G\_01942, score=4, range=794-812, str  
target 5' GGACAUCCCAAAGUCCUGA 3'  
:: :: :::::::::::::::  
query 3' CCGGUCGGGUUUCAGGGUU 5'  
query=miR9653a-3p, target=R03G\_09945, score=4, range=521-539, str  
target 5' GGACAUCCCAAAGUCCUGA 3'  
:: :: :::::::::::::::  
query 3' CCGGUCGGGUUUCAGGGUU 5'  
query=miR9653a-3p, target=R03G\_09194, score=4, range=797-815, str  
target 5' GGACAUCCCAAAGUCCUGA 3'  
:: :: :::::::::::::::  
query 3' CCGGUCGGGUUUCAGGGUU 5'  
query=miR9653a-3p, target=R03G\_03612, score=4, range=284-302, str  
target 5' GGACUGCUCAAAGUCCCGA 3'  
:: : :::::::::::::::  
query 3' CCGGUCGGGUUUCAGGGUU 5'  
query=miR9653a-3p, target=R03G\_02961, score=4, range=284-302, str  
target 5' GGACUGCUCAAAGUCCCGA 3'  
:: : :::::::::::::::  
query 3' CCGGUCGGGUUUCAGGGUU 5'  
query=miR9653a-3p, target=R03G\_10457, score=4, range=148-165, str  
target 5' GAACAGCCCAAAG-CCCAA 3'  
: ::::::::::::::: :::::::  
query 3' CCGGUCGGGUUUCAGGGUU 5'  
query=miR9653a-3p, target=R03G\_00639, score=4, range=174-193,  
strand=-1  
target 5' UGCCUGCCCAAAGUCCCAA 3'

query 3' CCGGUCGGG-UUUCAGGGUU 5'  
query=miR419, target=R03G\_17296, score=0, range=174-192, strand=1  
target 5' CUCACGUCAUCAUCCUCA 3'

query 3' GAGUGCAGUAGUAAGGAGU 5'  
query=miR419, target=R03G\_13948, score=2.5, range=1809-1827, strand=1  
target 5' CUCACCUCAUCAUUCUUCG 3'

query 3' GAGUGCAGUAGUAAGGAGU 5'  
query=miR419, target=R03G\_12214, score=3, range=947-966, strand=1  
target 5' CUCAACAUCAUCAUUUCUCA 3'

query 3' GAG-UGCAGUAGUAAGGAGU 5'  
query=miR419, target=R03G\_16237, score=3, range=1366-1385, strand=1  
target 5' CUUAUAGUCAUCAUCCUCC 3'

query 3' GAGUG-CAGUAGUAAGGAGU 5'  
query=miR419, target=R03G\_04424, score=3, range=425-443, strand=-1  
target 5' CUGCCGUCGUCAUCCUCA 3'

query 3' GAGUGCAGUAGUAAGGAGU 5'  
query=miR419, target=R03G\_02333, score=3.5, range=120-138, strand=1  
target 5' UUCACAUCAUCGUUCUUCA 3'

query 3' GAGUGCAGUAGUAAGGAGU 5'  
query=miR419, target=R03G\_17067, score=3.5, range=1021-1040, strand=1  
target 5' UUCAAGUUCAUUAUCCUCA 3'

query 3' GAGUGC-AGUAGUAAGGAGU 5'  
query=miR419, target=R03G\_13039, score=3.5, range=1728-1745, strand=1  
target 5' CUC-UGUCGUCAUCCUCC 3'

query 3' GAGUGCAGUAGUAAGGAGU 5'  
query=miR419, target=R03G\_01820, score=3.5, range=1471-1488, strand=1  
target 5' UUCA-GUCAUCAUCCCCA 3'

query 3' GAGUGCAGUAGUAAGGAGU 5'  
query=miR419, target=R03G\_03632, score=3.5, range=1466-1483, strand=1  
target 5' CUCUCGUCAUCAUU-CUCG 3'

query 3' GAGUGCAGUAGUAAGGAGU 5'  
query=miR419, target=R03G\_15326, score=3.5, range=68-85, strand=1  
target 5' CUUACAUCAUCA-UCCUCA 3'

query 3' GAGUGCAGUAGUAAGGAGU 5'  
query=miR419, target=R03G\_13329, score=3.5, range=276-293, strand  
target 5' CUC-UGUGAUCAUCCUCA 3'  
::: .:: :::::::::::::::  
query 3' GAGUGCAGUAGUAAGGAGU 5'  
query=miR419, target=R03G\_05065, score=4, range=500-518, strand=1  
target 5' AACACGUCAUUAUUCUUCA 3'  
:::::::::::::::::::::  
query 3' GAGUGCAGUAGUAAGGAGU 5'  
query=miR419, target=R03G\_17196, score=4, range=500-518, strand=1  
target 5' AACACGUCAUUAUUCUUCA 3'  
:::::::::::::::::::::  
query 3' GAGUGCAGUAGUAAGGAGU 5'  
query=miR419, target=R03G\_14928, score=4, range=29-47, strand=1  
target 5' CUCGUGUCAUCAUUACUCU 3'  
:.....: :::  
query 3' GAGUGCAGUAGUAAGGAGU 5'  
query=miR419, target=R03G\_14934, score=4, range=29-47, strand=1  
target 5' CUCGUGUCAUCAUUACUCU 3'  
:.....: :::  
query 3' GAGUGCAGUAGUAAGGAGU 5'  
query=miR419, target=R03G\_02621, score=4, range=423-440, strand=1  
target 5' CUCA-GUCAUCGUUUUUCA 3'  
:::: :::::::::::::::  
query 3' GAGUGCAGUAGUAAGGAGU 5'  
query=miR419, target=R03G\_16590, score=4, range=368-386, strand=1  
target 5' UUCCUGCCAUCAUCCUCA 3'  
.:: .: :::::::::::::::  
query 3' GAGUGCAGUAGUAAGGAGU 5'  
query=miR419, target=R03G\_06771, score=4, range=276-293, strand=1  
target 5' CUCACGUCGU-AUCCUCC 3'  
:.....: :::::::  
query 3' GAGUGCAGUAGUAAGGAGU 5'  
query=miR419, target=R03G\_02782, score=4, range=392-411, strand=1  
target 5' UAUACCGUCAUCAUCCUUA 3'  
. .: :::::::::::::::  
query 3' GAGU-GCAGUAGUAAGGAGU 5'  
query=miR419, target=R03G\_17114, score=4, range=473-491, strand=1  
target 5' AUCAAGUCAUCAUUCAUCA 3'  
::: :::::::::::::::  
query 3' GAGUGCAGUAGUAAGGAGU 5'  
query=miR419, target=R03G\_12716, score=4, range=269-287, strand=1  
target 5' CUCAACUCAUUAUCCUCC 3'  
:::: :::::::::::::::  
query 3' GAGUGCAGUAGUAAGGAGU 5'

query=miR419, target=R03G\_13887, score=4, range=465-483, strand=1  
target 5' CUCUCAUCAUCAUCCCCA 3'  
::: : ::::::::::: ::  
query 3' GAGUGCAGUAGUAAGGAGU 5'  
query=miR419, target=R03G\_04821, score=4, range=339-356, strand=1  
target 5' ACCAC-UCAUCAUCCUCC 3'  
::: : ::::::::::: ::  
query 3' GAGUGCAGUAGUAAGGAGU 5'  
query=miR419, target=R03G\_14305, score=4, range=452-470, strand=-  
target 5' GUCACGUCAUCAUUCUUUU 3'  
: ::::::::::: :  
query 3' GAGUGCAGUAGUAAGGAGU 5'  
query=miR419, target=R03G\_00234, score=4, range=1121-1139, strand  
target 5' UCCAUAUCAUCAUUCUUCA 3'  
. ::: : ::::::::::: ::  
query 3' GAGUGCAGUAGUAAGGAGU 5'  
query=miR419, target=R03G\_12448, score=4, range=416-434, strand=-  
target 5' CUGAAGUCAUCAUUCUUCU 3'  
:: : : ::::::::::: ::  
query 3' GAGUGCAGUAGUAAGGAGU 5'  
query=miR419, target=R03G\_01815, score=4, range=678-695, strand=-  
target 5' CUCAAGUCAUCA-UCUUCA 3'  
:::: : ::::::::::: : ::  
query 3' GAGUGCAGUAGUAAGGAGU 5'  
query=miR419, target=R03G\_10948, score=4, range=747-764, strand=-  
target 5' UCCAUGUCAU-AUCCUCA 3'  
. ::: : ::::::::::: ::  
query 3' GAGUGCAGUAGUAAGGAGU 5'  
query=miR6477, target=R03G\_16897, score=0, range=93-110, strand=1  
target 5' AUCAUCCUCUACUGUUCA 3'  
: ::::::::::: :  
query 3' UAGUAGGAGAUGACAAGU 5'  
query=miR6477, target=R03G\_17215, score=0, range=93-110, strand=1  
target 5' AUCAUCCUCUACUGUUCA 3'  
: ::::::::::: :  
query 3' UAGUAGGAGAUGACAAGU 5'  
query=miR6477, target=R03G\_03109, score=0, range=93-110, strand=1  
target 5' AUCAUCCUCUACUGUUCA 3'  
: ::::::::::: :  
query 3' UAGUAGGAGAUGACAAGU 5'  
query=miR6477, target=R03G\_10235, score=0, range=93-110, strand=1  
target 5' AUCAUCCUCUACUGUUCA 3'  
: ::::::::::: :  
query 3' UAGUAGGAGAUGACAAGU 5'  
query=miR6477, target=R03G\_03615, score=0, range=93-110, strand=1

target 5' AUCAUCCUCUACUGUUCA 3'  
:::  
query 3' UAGUAGGAGAUGACAAGU 5'  
query=miR6477, target=R03G\_01322, score=0, range=93-110, strand=1  
target 5' AUCAUCCUCUACUGUUCA 3'  
:::  
query 3' UAGUAGGAGAUGACAAGU 5'  
query=miR6477, target=R03G\_06423, score=0, range=93-110, strand=1  
target 5' AUCAUCCUCUACUGUUCA 3'  
:::  
query 3' UAGUAGGAGAUGACAAGU 5'  
query=miR6477, target=R03G\_09499, score=0, range=93-110, strand=1  
target 5' AUCAUCCUCUACUGUUCA 3'  
:::  
query 3' UAGUAGGAGAUGACAAGU 5'  
query=miR6477, target=R03G\_06441, score=0, range=93-110, strand=1  
target 5' AUCAUCCUCUACUGUUCA 3'  
:::  
query 3' UAGUAGGAGAUGACAAGU 5'  
query=miR6477, target=R03G\_01956, score=0, range=93-110, strand=1  
target 5' AUCAUCCUCUACUGUUCA 3'  
:::  
query 3' UAGUAGGAGAUGACAAGU 5'  
query=miR6477, target=R03G\_05336, score=0, range=93-110, strand=1  
target 5' AUCAUCCUCUACUGUUCA 3'  
:::  
query 3' UAGUAGGAGAUGACAAGU 5'  
query=miR6477, target=R03G\_07303, score=0, range=93-110, strand=1  
target 5' AUCAUCCUCUACUGUUCA 3'  
:::  
query 3' UAGUAGGAGAUGACAAGU 5'  
query=miR6477, target=R03G\_14359, score=0, range=93-110, strand=1  
target 5' AUCAUCCUCUACUGUUCA 3'  
:::  
query 3' UAGUAGGAGAUGACAAGU 5'  
query=miR6477, target=R03G\_00681, score=0, range=93-110, strand=1  
target 5' AUCAUCCUCUACUGUUCA 3'  
:::  
query 3' UAGUAGGAGAUGACAAGU 5'  
query=miR6477, target=R03G\_17285, score=0, range=93-110, strand=1  
target 5' AUCAUCCUCUACUGUUCA 3'  
:::  
query 3' UAGUAGGAGAUGACAAGU 5'  
query=miR6477, target=R03G\_09483, score=0, range=93-110, strand=1  
target 5' AUCAUCCUCUACUGUUCA 3'

query 3' UAGUAGGAGAUGACAAGU 5'  
query=miR6477, target=R03G\_05635, score=0, range=93-110, strand=1  
target 5' AUCAUCCUCUACUGUUCA 3'

query 3' UAGUAGGAGAUGACAAGU 5'  
query=miR6477, target=R03G\_16807, score=0, range=93-110, strand=1  
target 5' AUCAUCCUCUACUGUUCA 3'

query 3' UAGUAGGAGAUGACAAGU 5'  
query=miR6477, target=R03G\_09544, score=0, range=93-110, strand=1  
target 5' AUCAUCCUCUACUGUUCA 3'

query 3' UAGUAGGAGAUGACAAGU 5'  
query=miR6477, target=R03G\_17382, score=0, range=93-110, strand=1  
target 5' AUCAUCCUCUACUGUUCA 3'

query 3' UAGUAGGAGAUGACAAGU 5'  
query=miR6477, target=R03G\_07875, score=0, range=93-110, strand=1  
target 5' AUCAUCCUCUACUGUUCA 3'

query 3' UAGUAGGAGAUGACAAGU 5'  
query=miR6477, target=R03G\_02689, score=0, range=93-110, strand=1  
target 5' AUCAUCCUCUACUGUUCA 3'

query 3' UAGUAGGAGAUGACAAGU 5'  
query=miR6477, target=R03G\_01652, score=0, range=93-110, strand=1  
target 5' AUCAUCCUCUACUGUUCA 3'

query 3' UAGUAGGAGAUGACAAGU 5'  
query=miR6477, target=R03G\_10732, score=0, range=93-110, strand=1  
target 5' AUCAUCCUCUACUGUUCA 3'

query 3' UAGUAGGAGAUGACAAGU 5'  
query=miR6477, target=R03G\_15675, score=0, range=93-110, strand=1  
target 5' AUCAUCCUCUACUGUUCA 3'

query 3' UAGUAGGAGAUGACAAGU 5'  
query=miR6477, target=R03G\_13151, score=0.5, range=93-110, strand=1  
target 5' GUCAUCCUCUACUGUUCA 3'

query 3' UAGUAGGAGAUGACAAGU 5'  
query=miR6477, target=R03G\_07210, score=1, range=903-920, strand=1  
target 5' AUUGUCCUCUACUGUUCA 3'

query 3' UAGUAGGAGAUGACAAGU 5'  
query=miR6477, target=R03G\_00999, score=1, range=1935-1952, stran  
target 5' AUUGUCCUCUACUGUUCA 3'  
.....  
query 3' UAGUAGGAGAUGACAAGU 5'  
query=miR6477, target=R03G\_05622, score=2, range=93-110, strand=1  
target 5' AUCAUCCUCCACUGUUCA 3'  
.....  
query 3' UAGUAGGAGAUGACAAGU 5'  
query=miR6477, target=R03G\_01612, score=2, range=93-110, strand=1  
target 5' AUCAUCCUCCACUGUUCA 3'  
.....  
query 3' UAGUAGGAGAUGACAAGU 5'  
query=miR6477, target=R03G\_13742, score=2, range=93-110, strand=1  
target 5' AUCAUCCUCCACUGUUCA 3'  
.....  
query 3' UAGUAGGAGAUGACAAGU 5'  
query=miR6477, target=R03G\_13726, score=2, range=93-110, strand=1  
target 5' AUCAUCCUCCACUGUUCA 3'  
.....  
query 3' UAGUAGGAGAUGACAAGU 5'  
query=miR6477, target=R03G\_07704, score=2, range=93-110, strand=1  
target 5' AUCAUCCUCCACUGUUCA 3'  
.....  
query 3' UAGUAGGAGAUGACAAGU 5'  
query=miR6477, target=R03G\_09607, score=2, range=93-110, strand=1  
target 5' AUCAUCCUCCACUGUUCA 3'  
.....  
query 3' UAGUAGGAGAUGACAAGU 5'  
query=miR6477, target=R03G\_05915, score=2, range=93-110, strand=1  
target 5' AUCAUCCUCUACUGUGCA 3'  
.....  
query 3' UAGUAGGAGAUGACAAGU 5'  
query=miR6477, target=R03G\_01730, score=2, range=93-110, strand=1  
target 5' AUCAUCCUCUACUGUGCA 3'  
.....  
query 3' UAGUAGGAGAUGACAAGU 5'  
query=miR6477, target=R03G\_16551, score=2, range=93-110, strand=1  
target 5' AUCAUCCUCCACUGUUCA 3'  
.....  
query 3' UAGUAGGAGAUGACAAGU 5'  
query=miR6477, target=R03G\_08846, score=2, range=93-110, strand=1  
target 5' AUCAUCCUCCACUGUUCA 3'  
.....  
query 3' UAGUAGGAGAUGACAAGU 5'

```
query=miR6477, target=R03G_11773, score=2, range=93-110, strand=1
target 5' AUCAUCCUCCACUGUUCA 3'
:::::::::::: :::::::::::
query 3' UAGUAGGAGAUGACAAGU 5'
query=miR6477, target=R03G_11401, score=2, range=93-110, strand=1
target 5' AUCAUCCUCCACUGUUCA 3'
:::::::::::: :::::::::::
query 3' UAGUAGGAGAUGACAAGU 5'
query=miR6477, target=R03G_16555, score=2, range=93-110, strand=1
target 5' AUCAUCCUCCACUGUUCA 3'
:::::::::::: :::::::::::
query 3' UAGUAGGAGAUGACAAGU 5'
query=miR6477, target=R03G_03571, score=2, range=93-110, strand=1
target 5' AUCAUCCUCUACUGUACA 3'
:::::::::::: :::::::::::
query 3' UAGUAGGAGAUGACAAGU 5'
query=miR6477, target=R03G_13848, score=2, range=93-110, strand=1
target 5' AUCAUCCUCCACUGUUCA 3'
:::::::::::: :::::::::::
query 3' UAGUAGGAGAUGACAAGU 5'
query=miR6477, target=R03G_01902, score=2.5, range=354-371, stran
target 5' GUCUUCUUCUACUGUUCA 3'
... ::::::::::::::::::::
query 3' UAGUAGGAGAUGACAAGU 5'
query=miR6477, target=R03G_16099, score=3, range=747-764, strand=
target 5' AUCAUCUUCUACUGAUCA 3'
:::::::::::: :::::::::::
query 3' UAGUAGGAGAUGACAAGU 5'
query=miR6477, target=R03G_08661, score=3, range=93-110, strand=1
target 5' AUCAUCCUCCACUGUUUA 3'
:::::::::::: :::::::::::
query 3' UAGUAGGAGAUGACAAGU 5'
query=miR6477, target=R03G_13605, score=3, range=1012-1028, stran
target 5' AUC-UCUUCUGCUGUUCA 3'
... ::::::::::::::::::::
query 3' UAGUAGGAGAUGACAAGU 5'
query=miR6477, target=R03G_02290, score=3, range=76-92, strand=1
target 5' AUC-UCUUCUGCUGUUCA 3'
... ::::::::::::::::::::
query 3' UAGUAGGAGAUGACAAGU 5'
query=miR6477, target=R03G_10445, score=3, range=474-490, strand=
target 5' UUCAUCCUCUACUG-UCA 3'
:::::::::::: :::::::::::
query 3' UAGUAGGAGAUGACAAGU 5'
query=miR6477, target=R03G_09054, score=3, range=1282-1299, stran
```





... :::::::::::::::  
query 3' UAGUAGGAGAUGACAAGU 5'  
query=miR6477, target=R03G\_04535, score=3.5, range=2019-2036, str  
target 5' CUCAUCCUCUACUAAUUCG 3'  
::::::::::::: ::::  
query 3' UAGUAGGAGAUGACAAGU 5'  
query=miR6477, target=R03G\_14091, score=3.5, range=175-192, stran  
target 5' ACCGUCCUUUACUGUUCC 3'  
: :::::::::::::::  
query 3' UAGUAGGAGAUGACAAGU 5'  
query=miR6477, target=R03G\_11057, score=3.5, range=53-71, strand=  
target 5' GUCAUGCCUCUACUGUUUC 3'  
.::::: :::::::::::::::  
query 3' UAGUA-GGAGAUGACAAGU 5'  
query=miR6477, target=R03G\_08425, score=3.5, range=577-593, stran  
target 5' AUU-UUCUCUAAUUGUUCA 3'  
::: :::::::::::::::  
query 3' UAGUAGGAGAUGACAAGU 5'  
query=miR6477, target=R03G\_11337, score=3.5, range=217-234, stran  
target 5' AAGGUCCUCUAAUUGUUCA 3'  
: :::::::::::::::  
query 3' UAGUAGGAGAUGACAAGU 5'  
query=miR6477, target=R03G\_15299, score=3.5, range=911-929, stran  
target 5' GUCAUACCUCUCCUGUUCA 3'  
.::::: ::::: :::::::::::::::  
query 3' UAGUA-GGAGAUGACAAGU 5'  
query=miR6477, target=R03G\_00043, score=3.5, range=46-63, strand=  
target 5' AAUAACCUCUACUGUUCU 3'  
: .: :::::::::::::::  
query 3' UAGUAGGAGAUGACAAGU 5'  
query=miR6477, target=R03G\_09501, score=3.5, range=988-1004, stra  
target 5' AUC-UCCUCUUCUGUUCG 3'  
::: ::::: :::::::::::::::  
query 3' UAGUAGGAGAUGACAAGU 5'  
query=miR6477, target=R03G\_13886, score=3.5, range=749-767, stran  
target 5' GUCAUCUUGCUCUACUGUUCA 3'  
.::::: .: :::::::::::::::  
query 3' UAGUAGGA-GAUGACAAGU 5'  
query=miR6477, target=R03G\_08005, score=3.5, range=400-416, stran  
target 5' AUCAUCUUCU-CUGUUCG 3'  
::::::::::::: :::::::::::::::  
query 3' UAGUAGGAGAUGACAAGU 5'  
query=miR6477, target=R03G\_14023, score=3.5, range=598-615, stran  
target 5' AUCGUCUUCUACUGUUUC 3'  
::::::::::::: :::::::::::::::

```

query 3' UAGUAGGAGAUGACAAGU 5'
query=miR6477, target=R03G_08882, score=3.5, range=3155-3173,
strand=-1
target 5' CUCAUCCCUCUACUGUUUG 3'
:::: : : : : : : : : : : .
query 3' UAGUA-GGAGAUGACAAGU 5'
query=miR6477, target=R03G_13132, score=3.5, range=889-905, stran
target 5' AUU-UCCUCUGCUGUUCC 3'
::: : : : : : : : : : :
query 3' UAGUAGGAGAUGACAAGU 5'
query=miR6477, target=R03G_09535, score=3.5, range=1014-1032,
strand=-1
target 5' AUUAUGCUCAUACUGUUCA 3'
::::: : : : : : : : : :
query 3' UAGUAGGAG-AUGACAAGU 5'
query=miR6477, target=R03G_06479, score=4, range=4041-4058, stran
target 5' AUCGUCGUCUGCUGUUUCG 3'
::::: : : : : : : : : :
query 3' UAGUAGGAGAUGACAAGU 5'
query=miR6477, target=R03G_11450, score=4, range=297-315, strand=
target 5' UUCAUCCUCUAUUGUAUCA 3'
: : : : : : : : : : : : : :
query 3' UAGUAGGAGAUGACA-AGU 5'
query=miR6477, target=R03G_09842, score=4, range=2061-2078, stran
target 5' UUCAACUUCUAUUGUUCA 3'
: : : : : : : : : : : :
query 3' UAGUAGGAGAUGACAAGU 5'
query=miR6477, target=R03G_16482, score=4, range=105-122, strand=
target 5' AUCAUCCUCUACUUUACA 3'
: : : : : : : : : : : : :
query 3' UAGUAGGAGAUGACAAGU 5'
query=miR6477, target=R03G_02069, score=4, range=1033-1049, stran
target 5' AUC-UCUUCUGCUGUUUA 3'
: : : : : : : : : : : :
query 3' UAGUAGGAGAUGACAAGU 5'
query=miR6477, target=R03G_11156, score=4, range=181-197, strand=
target 5' AUU-UCCUUUACUGUUUG 3'
::: : : : : : : : : : .
query 3' UAGUAGGAGAUGACAAGU 5'
query=miR6477, target=R03G_02593, score=4, range=175-192, strand=
target 5' UGCCUUCUCUACUGUUCA 3'
: : : : : : : : : : :
query 3' UAGUAGGAGAUGACAAGU 5'
query=miR6477, target=R03G_06092, score=4, range=1884-1900, stran
target 5' AUCUUCCUCUGCUG-UCA 3'

```

::: ::::::::::: :::  
query 3' UAGUAGGAGAUGACAAGU 5'  
query=miR6477, target=R03G\_09997, score=4, range=1102-1119, stran  
target 5' AUAUCCUUUACUGUUCU 3'  
:: ::::::::::: :::  
query 3' UAGUAGGAGAUGACAAGU 5'  
query=miR6477, target=R03G\_16107, score=4, range=1572-1588, stran  
target 5' AUCA-CCACUGCUGUUCA 3'  
:::: :: ::::::::::: :::  
query 3' UAGUAGGAGAUGACAAGU 5'  
query=miR6477, target=R03G\_01072, score=4, range=2479-2495, stran  
target 5' UACA-CUUCUACUGUUCA 3'  
:: ::::::::::: :::  
query 3' UAGUAGGAGAUGACAAGU 5'  
query=miR6477, target=R03G\_10142, score=4, range=1542-1558, stran  
target 5' CUC-UCCUCUCCUGUUCA 3'  
:: ::::::::::: :::  
query 3' UAGUAGGAGAUGACAAGU 5'  
query=miR6477, target=R03G\_03107, score=4, range=1544-1560, stran  
target 5' CUC-UCCUCUCCUGUUCA 3'  
:: ::::::::::: :::  
query 3' UAGUAGGAGAUGACAAGU 5'  
query=miR6477, target=R03G\_04143, score=4, range=706-722, strand=  
target 5' AGCAU-CUCUACUGUUCC 3'  
: ::: ::::::::::: :::  
query 3' UAGUAGGAGAUGACAAGU 5'  
query=miR6477, target=R03G\_00987, score=4, range=177-194, strand=  
target 5' CUCAUCUUUUGCUGUUCA 3'  
::::::::::::::::: :::  
query 3' UAGUAGGAGAUGACAAGU 5'  
query=miR6477, target=R03G\_08255, score=4, range=87-105, strand=-  
target 5' AUCAUCUUUUACUGUCUCA 3'  
::::::::::::::::: :::  
query 3' UAGUAGGAGAUGACA-AGU 5'  
query=miR6477, target=R03G\_01827, score=4, range=105-123, strand=  
target 5' AUCAUCUUCUACUUGUUCU 3'  
::::::::::::::::: :::  
query 3' UAGUAGGAGAUG-ACAAGU 5'  
query=miR6477, target=R03G\_14674, score=4, range=284-300, strand=  
target 5' AUCAUCCUUUACU-UUUA 3'  
::::::::::::::::: :::  
query 3' UAGUAGGAGAUGACAAGU 5'  
query=miR6477, target=R03G\_01665, score=4, range=428-444, strand=  
target 5' AUCAUUCUCUGCU-UUCA 3'  
::::::::::::::::: :::

```

query 3' UAGUAGGAGAUGACAAGU 5'
query=miR6477, target=R03G_00507, score=4, range=481-498, strand=
target 5' AUCAUCCUCUUCUGUUAA 3'
: : : : : : :
query 3' UAGUAGGAGAUGACAAGU 5'
query=miR6477, target=R03G_14152, score=4, range=1442-1459, stran
target 5' AUAUCUUCUACGGUUCA 3'
: : : : : : :
query 3' UAGUAGGAGAUGACAAGU 5'
query=miR6477, target=R03G_12763, score=4, range=3051-3069, stran
target 5' AUCCAUCCACUGCUGUUCA 3'
: : : : : : :
query 3' UA-GUAGGAGAUGACAAGU 5'
query=miR6477, target=R03G_09843, score=4, range=1781-1798, stran
target 5' AGCAAUCUUUACUGUUCA 3'
: : : : : : :
query 3' UAGUAGGAGAUGACAAGU 5'
query=miR6477, target=R03G_12344, score=4, range=904-921, strand=
target 5' AUAACCCUCUACUGUUUU 3'
: : : : : : :
query 3' UAGUAGGAGAUGACAAGU 5'
query=miR6477, target=R03G_17111, score=4, range=691-707, strand=
target 5' GUU-UCCUCUACUGUGCA 3'
. . . : : : : : : : :
query 3' UAGUAGGAGAUGACAAGU 5'
query=miR6477, target=R03G_13627, score=4, range=434-450, strand=
target 5' ACCAUCCUCUACU-UUCU 3'
: : : : : : :
query 3' UAGUAGGAGAUGACAAGU 5'
query=miR7734-3p, target=R03G_13273, score=0, range=647-668, stra
target 5' CGUUGAAUGUGGACUGGUUCCA 3'
: : : : : : :
query 3' GCAACUACACCUAGACCAAGGU 5'
query=miR7734-3p, target=R03G_10217, score=0, range=647-668, stra
target 5' CGUUGAAUGUGGACUGGUUCCA 3'
: : : : : : :
query 3' GCAACUACACCUAGACCAAGGU 5'
query=miR7734-3p, target=R03G_16749, score=0, range=647-668, stra
target 5' CGUUGAAUGUGGACUGGUUCCA 3'
: : : : : : :
query 3' GCAACUACACCUAGACCAAGGU 5'
query=miR7734-3p, target=R03G_13145, score=0, range=647-668, stra
target 5' CGUUGAAUGUGGACUGGUUCCA 3'
: : : : : : :
query 3' GCAACUACACCUAGACCAAGGU 5'

```

query=miR7734-3p, target=R03G\_11969, score=0, range=647-668, str  
target 5' CGUUGAAUGUGGACUGGUUCCA 3'  
::::::::::::::::::::::::::  
query 3' GCAACUUACACCUGACCAAGGU 5'  
query=miR7734-3p, target=R03G\_07698, score=0, range=647-668, str  
target 5' CGUUGAAUGUGGACUGGUUCCA 3'  
::::::::::::::::::::::::::  
query 3' GCAACUUACACCUGACCAAGGU 5'  
query=miR7734-3p, target=R03G\_11237, score=0, range=647-668, str  
target 5' CGUUGAAUGUGGACUGGUUCCA 3'  
::::::::::::::::::::::::::  
query 3' GCAACUUACACCUGACCAAGGU 5'  
query=miR7734-3p, target=R03G\_04683, score=0, range=647-668, str  
target 5' CGUUGAAUGUGGACUGGUUCCA 3'  
::::::::::::::::::::::::::  
query 3' GCAACUUACACCUGACCAAGGU 5'  
query=miR7734-3p, target=R03G\_11409, score=0, range=647-668, str  
target 5' CGUUGAAUGUGGACUGGUUCCA 3'  
::::::::::::::::::::::::::  
query 3' GCAACUUACACCUGACCAAGGU 5'  
query=miR7734-3p, target=R03G\_04212, score=0, range=647-668, str  
target 5' CGUUGAAUGUGGACUGGUUCCA 3'  
::::::::::::::::::::::::::  
query 3' GCAACUUACACCUGACCAAGGU 5'  
query=miR7734-3p, target=R03G\_14550, score=0, range=647-668, str  
target 5' CGUUGAAUGUGGACUGGUUCCA 3'  
::::::::::::::::::::::::::  
query 3' GCAACUUACACCUGACCAAGGU 5'  
query=miR7734-3p, target=R03G\_15898, score=0, range=647-668, str  
target 5' CGUUGAAUGUGGACUGGUUCCA 3'  
::::::::::::::::::::::::::  
query 3' GCAACUUACACCUGACCAAGGU 5'  
query=miR7734-3p, target=R03G\_09930, score=0, range=647-668, str  
target 5' CGUUGAAUGUGGACUGGUUCCA 3'  
::::::::::::::::::::::::::  
query 3' GCAACUUACACCUGACCAAGGU 5'  
query=miR7734-3p, target=R03G\_06731, score=0, range=647-668, str  
target 5' CGUUGAAUGUGGACUGGUUCCA 3'  
::::::::::::::::::::::::::  
query 3' GCAACUUACACCUGACCAAGGU 5'  
query=miR7734-3p, target=R03G\_07307, score=0, range=647-668, str  
target 5' CGUUGAAUGUGGACUGGUUCCA 3'  
::::::::::::::::::::::::::  
query 3' GCAACUUACACCUGACCAAGGU 5'  
query=miR7734-3p, target=R03G\_09601, score=0, range=647-668, str

```

target 5' CGUUGAAUGUGGACUGGUUCCA 3'
::::::::::::::::::::::::::::
query 3' GCAACUUACACCUAGACCAAGGU 5'
query=miR7734-3p, target=R03G_11538, score=0, range=647-668, stra
target 5' CGUUGAAUGUGGACUGGUUCCA 3'
::::::::::::::::::::::::::::
query 3' GCAACUUACACCUAGACCAAGGU 5'
query=miR7734-3p, target=R03G_07721, score=0, range=647-668, stra
target 5' CGUUGAAUGUGGACUGGUUCCA 3'
::::::::::::::::::::::::::::
query 3' GCAACUUACACCUAGACCAAGGU 5'
query=miR7734-3p, target=R03G_01728, score=0, range=605-626, stra
target 5' CGUUGAAUGUGGACUGGUUCCA 3'
::::::::::::::::::::::::::::
query 3' GCAACUUACACCUAGACCAAGGU 5'
query=miR7734-3p, target=R03G_16827, score=0, range=647-668, stra
target 5' CGUUGAAUGUGGACUGGUUCCA 3'
::::::::::::::::::::::::::::
query 3' GCAACUUACACCUAGACCAAGGU 5'
query=miR7734-3p, target=R03G_07980, score=0, range=35-56, strand
target 5' CGUUGAAUGUGGACUGGUUCCA 3'
::::::::::::::::::::::::::::
query 3' GCAACUUACACCUAGACCAAGGU 5'
query=miR7734-3p, target=R03G_07737, score=0, range=8-29, strand=
target 5' CGUUGAAUGUGGACUGGUUCCA 3'
::::::::::::::::::::::::::::
query 3' GCAACUUACACCUAGACCAAGGU 5'
query=miR7734-3p, target=R03G_17257, score=2, range=563-584, stra
target 5' CAUUGAAUGUGGAUUGGUUCCA 3'
: ::::::::::::::::::::::
query 3' GCAACUUACACCUAGACCAAGGU 5'
query=miR7734-3p, target=R03G_16136, score=2, range=563-584, stra
target 5' CAUUGAAUGUGGAUUGGUUCCA 3'
: ::::::::::::::::::::::
query 3' GCAACUUACACCUAGACCAAGGU 5'
query=miR7734-3p, target=R03G_05424, score=2, range=563-584, stra
target 5' CAUUGAAUGUGGAUUGGUUCCA 3'
: ::::::::::::::::::::::
query 3' GCAACUUACACCUAGACCAAGGU 5'
query=miR7734-3p, target=R03G_15889, score=2, range=563-584, stra
target 5' CAUUGAAUGUGGAUUGGUUCCA 3'
: ::::::::::::::::::::::
query 3' GCAACUUACACCUAGACCAAGGU 5'
query=miR7734-3p, target=R03G_10735, score=2, range=92-113, stran
target 5' CAUUGAAUGUGGAUUGGUUCCA 3'

```

: ::::::::::::::::::::  
query 3' GCAACUUACACCUGACCAAGGU 5'  
query=miR7734-3p, target=R03G\_10039, score=2, range=563-584, stra  
target 5' CAUUGAAUGUGGAUUGGUUCCA 3'  
: ::::::::::::::::::::  
query 3' GCAACUUACACCUGACCAAGGU 5'  
query=miR7734-3p, target=R03G\_02828, score=2, range=563-584, stra  
target 5' CAUUGAAUGUGGAUUGGUUCCA 3'  
: ::::::::::::::::::::  
query 3' GCAACUUACACCUGACCAAGGU 5'  
query=miR7734-3p, target=R03G\_11949, score=2, range=8-29, strand=  
target 5' CAUUGAAUGUGGAUUGGUUCCA 3'  
: ::::::::::::::::::::  
query 3' GCAACUUACACCUGACCAAGGU 5'  
query=miR7734-3p, target=R03G\_00291, score=2, range=563-584, stra  
target 5' CAUUGAAUGUGGAUUGGUUCCA 3'  
: ::::::::::::::::::::  
query 3' GCAACUUACACCUGACCAAGGU 5'  
query=miR7734-3p, target=R03G\_14991, score=2, range=8-29, strand=  
target 5' CAUUGAAUGUGGAUUGGUUCCA 3'  
: ::::::::::::::::::::  
query 3' GCAACUUACACCUGACCAAGGU 5'  
query=miR7734-3p, target=R03G\_12072, score=4, range=866-887, stra  
target 5' CGUUGAAUGUCGAUUGGUUUCA 3'  
: ::::::::::::::::::::  
query 3' GCAACUUACACCUGACCAAGGU 5'  
query=miR7734-3p, target=R03G\_17358, score=4, range=866-887, stra  
target 5' CGUUGAAUGUCGAUUGGUUUCA 3'  
: ::::::::::::::::::::  
query 3' GCAACUUACACCUGACCAAGGU 5'  
query=miR7734-3p, target=R03G\_07686, score=4, range=866-887, stra  
target 5' CGUUGAAUGUCGAUUGGUUUCA 3'  
: ::::::::::::::::::::  
query 3' GCAACUUACACCUGACCAAGGU 5'  
query=miR7734-3p, target=R03G\_14710, score=4, range=866-887, stra  
target 5' CGUUGAAUGUCGAUUGGUUUCA 3'  
: ::::::::::::::::::::  
query 3' GCAACUUACACCUGACCAAGGU 5'  
query=miR7734-3p, target=R03G\_17385, score=4, range=866-887, stra  
target 5' CGUUGAAUGUCGAUUGGUUUCA 3'  
: ::::::::::::::::::::  
query 3' GCAACUUACACCUGACCAAGGU 5'  
query=miR7734-3p, target=R03G\_12009, score=4, range=866-887, stra  
target 5' CGUUGAAUGUCGAUUGGUUUCA 3'  
: ::::::::::::::::::::



query 3' GCAACUACACCUAGACCAAGGU 5'  
query=miR7734-3p, target=R03G\_09940, score=4, range=866-887, str  
target 5' CGUUGAAUGUCGAUUGGUUUCA 3'  
.....  
query 3' GCAACUACACCUAGACCAAGGU 5'  
query=miR7734-3p, target=R03G\_07976, score=4, range=863-884, str  
target 5' CGUUGAAUGUCGAUUGGUUUCA 3'  
.....  
query 3' GCAACUACACCUAGACCAAGGU 5'  
query=miR7734-3p, target=R03G\_10725, score=4, range=830-851, str  
target 5' CGUUGAAUGUCGAUUGGUUUCA 3'  
.....  
query 3' GCAACUACACCUAGACCAAGGU 5'  
query=miR7734-3p, target=R03G\_03580, score=4, range=791-812, str  
target 5' CGUUGAAUGUCGAUUGGUUUCA 3'  
.....  
query 3' GCAACUACACCUAGACCAAGGU 5'  
query=miR7734-3p, target=R03G\_17441, score=4, range=593-614, str  
target 5' CGUUGAAUGUCGAUUGGUUUCA 3'  
.....  
query 3' GCAACUACACCUAGACCAAGGU 5'  
query=miR7734-3p, target=R03G\_13747, score=4, range=866-887, str  
target 5' CGUUGAAUGUCGAUUGGUUUCA 3'  
.....  
query 3' GCAACUACACCUAGACCAAGGU 5'  
query=miR7734-3p, target=R03G\_08042, score=4, range=398-419, str  
target 5' CGUUGAAUGUCGAUUGGUUUCA 3'  
.....  
query 3' GCAACUACACCUAGACCAAGGU 5'  
query=miR7734-3p, target=R03G\_07294, score=4, range=467-488, str  
target 5' CGUUGAAUGUCGAUUGGUUUCA 3'  
.....  
query 3' GCAACUACACCUAGACCAAGGU 5'  
query=miR7734-3p, target=R03G\_05631, score=4, range=866-887, str  
target 5' CGUUGAAUGUCGAUUGGUUUCA 3'  
.....  
query 3' GCAACUACACCUAGACCAAGGU 5'  
query=miR7734-3p, target=R03G\_07130, score=4, range=770-791, str  
target 5' CGUUGAAUGUCGAUUGGUUUCA 3'  
.....  
query 3' GCAACUACACCUAGACCAAGGU 5'  
query=miR7734-3p, target=R03G\_16739, score=4, range=866-887, str  
target 5' CGUUGAAUGUCGAUUGGUUUCA 3'  
.....  
query 3' GCAACUACACCUAGACCAAGGU 5'

query=miR7734-3p, target=R03G\_09192, score=4, range=866-887, strand=1  
target 5' CGUUGAAUGUCGAUUGGUUUC A 3'  
:::~::~:~:::  
query 3' GCAACUACACCUGACCAAGGU 5'  
query=miR7734-3p, target=R03G\_00693, score=4, range=344-365, strand=1  
target 5' CGUUGAAUGUCGAUUGGUUUC A 3'  
:::~::~:~:::  
query 3' GCAACUACACCUGACCAAGGU 5'  
query=miR9476-5p, target=R03G\_09279, score=3.5, range=505-527, strand=1  
target 5' CAAAAGAGUGGGCAAGACUGGA 3'  
:::~::~:~::~:~:::  
query 3' UUUUUUUUCAUCCGUUCUGAUCU 5'  
query=miR9476-5p, target=R03G\_11610, score=4, range=2233-2254, strand=-1  
target 5' AAAAUAAAGUAGGUAAGA-UAGA 3'  
:::: ~:~::~:~::~:~:::  
query 3' UUUUUUUUCAUCCGUUCUGAUCU 5'  
query=miR3476-5p, target=R03G\_07738, score=0, range=378-398, strand=1  
target 5' GCAGCAGCAGCACCCAGUUC A 3'  
:::~::~:~::~:~:::  
query 3' CGUCGUCGUCGUGGGUCAAGU 5'  
query=miR3476-5p, target=R03G\_01726, score=0, range=372-392, strand=1  
target 5' GCAGCAGCAGCACCCAGUUC A 3'  
:::~::~:~::~:~:::  
query 3' CGUCGUCGUCGUGGGUCAAGU 5'  
query=miR3476-5p, target=R03G\_11537, score=0, range=369-389, strand=1  
target 5' GCAGCAGCAGCACCCAGUUC A 3'  
:::~::~:~::~:~:::  
query 3' CGUCGUCGUCGUGGGUCAAGU 5'  
query=miR3476-5p, target=R03G\_11236, score=0, range=369-389, strand=1  
target 5' GCAGCAGCAGCACCCAGUUC A 3'  
:::~::~:~::~:~:::  
query 3' CGUCGUCGUCGUGGGUCAAGU 5'  
query=miR3476-5p, target=R03G\_07981, score=0, range=327-347, strand=1  
target 5' GCAGCAGCAGCACCCAGUUC A 3'  
:::~::~:~::~:~:::  
query 3' CGUCGUCGUCGUGGGUCAAGU 5'  
query=miR3476-5p, target=R03G\_07696, score=0, range=327-347, strand=1  
target 5' GCAGCAGCAGCACCCAGUUC A 3'  
:::~::~:~::~:~:::  
query 3' CGUCGUCGUCGUGGGUCAAGU 5'  
query=miR3476-5p, target=R03G\_06730, score=0, range=327-347, strand=1  
target 5' GCAGCAGCAGCACCCAGUUC A 3'  
:::~::~:~::~:~:::

query 3' CGUCGUCGUCGUGGGUCAAGU 5'  
query=miR3476-5p, target=R03G\_07720, score=0, range=327-347, stra  
target 5' GCAGCAGCAGCACCCAGUUCA 3'  
.....  
query 3' CGUCGUCGUCGUGGGUCAAGU 5'  
query=miR3476-5p, target=R03G\_04211, score=0, range=327-347, stra  
target 5' GCAGCAGCAGCACCCAGUUCA 3'  
.....  
query 3' CGUCGUCGUCGUGGGUCAAGU 5'  
query=miR3476-5p, target=R03G\_09602, score=0, range=327-347, stra  
target 5' GCAGCAGCAGCACCCAGUUCA 3'  
.....  
query 3' CGUCGUCGUCGUGGGUCAAGU 5'  
query=miR3476-5p, target=R03G\_07306, score=0, range=327-347, stra  
target 5' GCAGCAGCAGCACCCAGUUCA 3'  
.....  
query 3' CGUCGUCGUCGUGGGUCAAGU 5'  
query=miR3476-5p, target=R03G\_14551, score=0, range=327-347, stra  
target 5' GCAGCAGCAGCACCCAGUUCA 3'  
.....  
query 3' CGUCGUCGUCGUGGGUCAAGU 5'  
query=miR3476-5p, target=R03G\_09929, score=0, range=327-347, stra  
target 5' GCAGCAGCAGCACCCAGUUCA 3'  
.....  
query 3' CGUCGUCGUCGUGGGUCAAGU 5'  
query=miR3476-5p, target=R03G\_15897, score=0, range=327-347, stra  
target 5' GCAGCAGCAGCACCCAGUUCA 3'  
.....  
query 3' CGUCGUCGUCGUGGGUCAAGU 5'  
query=miR3476-5p, target=R03G\_09603, score=0, range=369-389, stra  
target 5' GCAGCAGCAGCACCCAGUUCA 3'  
.....  
query 3' CGUCGUCGUCGUGGGUCAAGU 5'  
query=miR3476-5p, target=R03G\_10218, score=0, range=348-368, stra  
target 5' GCAGCAGCAGCACCCAGUUCA 3'  
.....  
query 3' CGUCGUCGUCGUGGGUCAAGU 5'  
query=miR3476-5p, target=R03G\_16748, score=0, range=327-347, stra  
target 5' GCAGCAGCAGCACCCAGUUCA 3'  
.....  
query 3' CGUCGUCGUCGUGGGUCAAGU 5'  
query=miR3476-5p, target=R03G\_04679, score=0, range=297-317, stra  
target 5' GCAGCAGCAGCACCCAGUUCA 3'  
.....  
query 3' CGUCGUCGUCGUGGGUCAAGU 5'

query=miR3476-5p, target=R03G\_11977, score=0, range=291-311, str  
 target 5' GCAGCAGCAGCACCCAGUUCA 3'  
 :::::::::::::::::::::::  
 query 3' CGUCGUCGUCGUGGGUCAAGU 5'  
 query=miR3476-5p, target=R03G\_02228, score=0, range=327-347, str  
 target 5' GCAGCAGCAGCACCCAGUUCA 3'  
 :::::::::::::::::::::::  
 query 3' CGUCGUCGUCGUGGGUCAAGU 5'  
 query=miR3476-5p, target=R03G\_10041, score=1, range=357-377, str  
 target 5' GCAGCAGCAGCAUCCAGUUCA 3'  
 :::::::::::::::::::::::  
 query 3' CGUCGUCGUCGUGGGUCAAGU 5'  
 query=miR3476-5p, target=R03G\_17248, score=1, range=357-377, str  
 target 5' GCAGCAGCAGCAUCCAGUUCA 3'  
 :::::::::::::::::::::::  
 query 3' CGUCGUCGUCGUGGGUCAAGU 5'  
 query=miR3476-5p, target=R03G\_15147, score=1, range=321-341, str  
 target 5' GCAGCAGCAGCAUCCAGUUCA 3'  
 :::::::::::::::::::::::  
 query 3' CGUCGUCGUCGUGGGUCAAGU 5'  
 query=miR3476-5p, target=R03G\_03584, score=1, range=285-305, str  
 target 5' GCAGCAGCAGCAUCCAGUUCA 3'  
 :::::::::::::::::::::::  
 query 3' CGUCGUCGUCGUGGGUCAAGU 5'  
 query=miR3476-5p, target=R03G\_15890, score=1, range=357-377, str  
 target 5' GCAGCAGCAGCAUCCAGUUCA 3'  
 :::::::::::::::::::::::  
 query 3' CGUCGUCGUCGUGGGUCAAGU 5'  
 query=miR3476-5p, target=R03G\_13146, score=1, range=357-377, str  
 target 5' GCAGCAGCAGCAUCCAGUUCA 3'  
 :::::::::::::::::::::::  
 query 3' CGUCGUCGUCGUGGGUCAAGU 5'  
 query=miR3476-5p, target=R03G\_17256, score=1, range=354-374, str  
 target 5' GCAGCAGCAGCAUCCAGUUCA 3'  
 :::::::::::::::::::::::  
 query 3' CGUCGUCGUCGUGGGUCAAGU 5'  
 query=miR3476-5p, target=R03G\_16137, score=1, range=351-371, str  
 target 5' GCAGCAGCAGCAUCCAGUUCA 3'  
 :::::::::::::::::::::::  
 query 3' CGUCGUCGUCGUGGGUCAAGU 5'  
 query=miR3476-5p, target=R03G\_17350, score=1, range=351-371, str  
 target 5' GCAGCAGCAGCAUCCAGUUCA 3'  
 :::::::::::::::::::::::  
 query 3' CGUCGUCGUCGUGGGUCAAGU 5'  
 query=miR3476-5p, target=R03G\_00288, score=1, range=348-368, str



query=miR8137, target=R03G\_17257, score=1, range=1403-1424, stran  
target 5' AUUUUGUGAACUGGUUGCGGUA 3'  
:~::~  
query 3' UAAAACACUUGACCAACGCUAU 5'  
query=miR8137, target=R03G\_05424, score=1, range=1403-1424, stran  
target 5' AUUUUGUGAACUGGUUGCGGUA 3'  
:~::~  
query 3' UAAAACACUUGACCAACGCUAU 5'  
query=miR8137, target=R03G\_15889, score=1, range=1403-1424, stran  
target 5' AUUUUGUGAACUGGUUGCGGUA 3'  
:~::~  
query 3' UAAAACACUUGACCAACGCUAU 5'  
query=miR8137, target=R03G\_16136, score=1, range=1403-1424, stran  
target 5' AUUUUGUGAACUGGUUGCGGUA 3'  
:~::~  
query 3' UAAAACACUUGACCAACGCUAU 5'  
query=miR8137, target=R03G\_10735, score=1, range=932-953, strand=  
target 5' AUUUUGUGAACUGGUUGCGGUA 3'  
:~::~  
query 3' UAAAACACUUGACCAACGCUAU 5'  
query=miR8137, target=R03G\_09183, score=1, range=620-641, strand=  
target 5' AUUUUGUGAACUGGUUGCGGUA 3'  
:~::~  
query 3' UAAAACACUUGACCAACGCUAU 5'  
query=miR8137, target=R03G\_00289, score=1, range=215-236, strand=  
target 5' AUUUUGUGAACUGGUUGCGGUA 3'  
:~::~  
query 3' UAAAACACUUGACCAACGCUAU 5'  
query=miR8137, target=R03G\_17351, score=1, range=215-236, strand=  
target 5' AUUUUGUGAACUGGUUGCGGUA 3'  
:~::~  
query 3' UAAAACACUUGACCAACGCUAU 5'  
query=miR8137, target=R03G\_11949, score=1, range=848-869, strand=  
target 5' AUUUUGUGAACUGGUUGCGGUA 3'  
:~::~  
query 3' UAAAACACUUGACCAACGCUAU 5'  
query=miR8137, target=R03G\_10040, score=1, range=77-98, strand=1  
target 5' AUUUUGUGAACUGGUUGCGGUA 3'  
:~::~  
query 3' UAAAACACUUGACCAACGCUAU 5'  
query=miR8571, target=R03G\_06442, score=0, range=7167-7188, stran  
target 5' AGAACAGGAUCUUGACGAUGAA 3'  
:~::~  
query 3' UCUUGUCCUAGAACUGCUACUU 5'  
query=miR8571, target=R03G\_16557, score=0, range=1443-1464, stran

```

target 5' AGAACAGGAUCUUGACGAUGAA 3'
:
query 3' UCUUGUCCUAGAACUGCUACUU 5'
query=miR8571, target=R03G_07098, score=0, range=1443-1464, stran
target 5' AGAACAGGAUCUUGACGAUGAA 3'
:
query 3' UCUUGUCCUAGAACUGCUACUU 5'
query=miR8571, target=R03G_01745, score=0, range=1443-1464, stran
target 5' AGAACAGGAUCUUGACGAUGAA 3'
:
query 3' UCUUGUCCUAGAACUGCUACUU 5'
query=miR8571, target=R03G_17438, score=0, range=975-996, strand=
target 5' AGAACAGGAUCUUGACGAUGAA 3'
:
query 3' UCUUGUCCUAGAACUGCUACUU 5'
query=miR8571, target=R03G_14995, score=0, range=1443-1464, stran
target 5' AGAACAGGAUCUUGACGAUGAA 3'
:
query 3' UCUUGUCCUAGAACUGCUACUU 5'
query=miR8571, target=R03G_09540, score=0, range=651-672, strand=
target 5' AGAACAGGAUCUUGACGAUGAA 3'
:
query 3' UCUUGUCCUAGAACUGCUACUU 5'
query=miR8571, target=R03G_05271, score=0, range=1443-1464, stran
target 5' AGAACAGGAUCUUGACGAUGAA 3'
:
query 3' UCUUGUCCUAGAACUGCUACUU 5'
query=miR8571, target=R03G_03098, score=0, range=651-672, strand=
target 5' AGAACAGGAUCUUGACGAUGAA 3'
:
query 3' UCUUGUCCUAGAACUGCUACUU 5'
query=miR8571, target=R03G_00290, score=0, range=1443-1464, stran
target 5' AGAACAGGAUCUUGACGAUGAA 3'
:
query 3' UCUUGUCCUAGAACUGCUACUU 5'
query=miR8571, target=R03G_15134, score=0, range=1485-1506, stran
target 5' AGAACAGGAUCUUGACGAUGAA 3'
:
query 3' UCUUGUCCUAGAACUGCUACUU 5'
query=miR8571, target=R03G_00486, score=0, range=240-261, strand=
target 5' AGAACAGGAUCUUGACGAUGAA 3'
:
query 3' UCUUGUCCUAGAACUGCUACUU 5'
query=miR8571, target=R03G_12470, score=0, range=1443-1464, stran
target 5' AGAACAGGAUCUUGACGAUGAA 3'

```

query 3' UCUUGUCCUAGAACUGCUACUU 5'  
query=miR8571, target=R03G\_16132, score=0, range=1443-1464, stran  
target 5' AGAACAGGAUCUUGACGAUGAA 3'

query 3' UCUUGUCCUAGAACUGCUACUU 5'  
query=miR8571, target=R03G\_01928, score=0, range=1443-1464, stran  
target 5' AGAACAGGAUCUUGACGAUGAA 3'

query 3' UCUUGUCCUAGAACUGCUACUU 5'  
query=miR8571, target=R03G\_11524, score=0, range=510-531, strand=  
target 5' AGAACAGGAUCUUGACGAUGAA 3'

query 3' UCUUGUCCUAGAACUGCUACUU 5'  
query=miR8571, target=R03G\_16560, score=0, range=513-534, strand=  
target 5' AGAACAGGAUCUUGACGAUGAA 3'

query 3' UCUUGUCCUAGAACUGCUACUU 5'  
query=miR8571, target=R03G\_02699, score=0, range=240-261, strand=  
target 5' AGAACAGGAUCUUGACGAUGAA 3'

query 3' UCUUGUCCUAGAACUGCUACUU 5'  
query=miR8571, target=R03G\_14926, score=3, range=31-51, strand=1  
target 5' AGAA-AGGAUUUUGAUGAUGAA 3'

query 3' UCUUGUCCUAGAACUGCUACUU 5'  
query=miR8571, target=R03G\_12504, score=4, range=935-956, strand=  
target 5' AGAAAAGGAUCUUGCUGAUGAA 3'

query 3' CUUCUUUGUACGAAUACCUCCU 5'  
query=miR7719-5p, target=R03G\_13270, score=0, range=525-546, stra  
target 5' GAAGAAACAUGCUUAUGGAGGA 3'

query 3' CUUCUUUGUACGAAUACCUCCU 5'  
query=miR7719-5p, target=R03G\_14363, score=0, range=483-504, stra  
target 5' GAAGAAACAUGCUUAUGGAGGA 3'

query 3' CUUCUUUGUACGAAUACCUCCU 5'  
query=miR7719-5p, target=R03G\_10774, score=0, range=492-513, stra  
target 5' GAAGAAACAUGCUUAUGGAGGA 3'

query 3' CUUCUUUGUACGAAUACCUCCU 5'  
query=miR7719-5p, target=R03G\_13863, score=0, range=225-246, stra  
target 5' GAAGAAACAUGCUUAUGGAGGA 3'



```

query 3' CUUCUUUGUACGAAUACCUCCU 5'
query=miR7719-5p, target=R03G_13755, score=0, range=525-546, strand=1
target 5' GAAGAAACAUGCUUAUGGAGGA 3'
.....
query 3' CUUCUUUGUACGAAUACCUCCU 5'
query=miR7719-5p, target=R03G_08849, score=0, range=525-546, strand=1
target 5' GAAGAAACAUGCUUAUGGAGGA 3'
.....
query 3' CUUCUUUGUACGAAUACCUCCU 5'
query=miR7719-5p, target=R03G_14979, score=0, range=525-546, strand=1
target 5' GAAGAAACAUGCUUAUGGAGGA 3'
.....
query 3' CUUCUUUGUACGAAUACCUCCU 5'
query=miR7719-5p, target=R03G_17276, score=0.5, range=615-636, strand=1
target 5' GAGGAAACAUGCUUAUGGAGGA 3'
.....
query 3' CUUCUUUGUACGAAUACCUCCU 5'
query=miR7719-5p, target=R03G_13741, score=0.5, range=525-546, strand=1
target 5' GAAGAAACGUGCUUAUGGAGGA 3'
.....
query 3' CUUCUUUGUACGAAUACCUCCU 5'
query=miR7719-5p, target=R03G_17249, score=1, range=525-546, strand=1
target 5' AAAGAAACAUGCUUAUGGAGGA 3'
.....
query 3' CUUCUUUGUACGAAUACCUCCU 5'
query=miR7719-5p, target=R03G_05936, score=2, range=525-546, strand=1
target 5' GAAGAAACAUGCUUAUGGAGCA 3'
.....
query 3' CUUCUUUGUACGAAUACCUCCU 5'
query=miR7719-5p, target=R03G_05420, score=2, range=386-407, strand=1
target 5' GAAGAAACAUGCUUAUGGAGCA 3'
.....
query 3' CUUCUUUGUACGAAUACCUCCU 5'
query=miR5177, target=R03G_17015, score=0, range=1208-1227, strand=1
target 5' CUGCUCGUUUUCCAACCUCA 3'
.....
query 3' GACGAGCAAAGGUUGGAGU 5'
query=miR5177, target=R03G_11637, score=2, range=791-809, strand=1
target 5' AUGCUC-UUUUCCAACCUCA 3'
.....
query 3' GACGAGCAAAGGUUGGAGU 5'
query=miR5177, target=R03G_12627, score=3, range=1118-1137, strand=1
target 5' CUGCUCGUUUUCCAACCUCC 3'

```

::::: :::::  
query 3' GACGAGCAAAAGGUUGGAGU 5'  
query=miR5177, target=R03G\_00488, score=3, range=383-403, strand=  
target 5' CUGCUCGAUUUUUCAACCUCC 3'  
::::: :::::  
query 3' GACGAGC-AAAAGGUUGGAGU 5'  
query=miR5177, target=R03G\_13129, score=4, range=346-365, strand=  
target 5' CUGAUCGGUUUCCAACCUUA 3'  
::: ::: :::::  
query 3' GACGAGCAAAAGGUUGGAGU 5'  
query=miR5177, target=R03G\_01141, score=4, range=499-517, strand=  
target 5' CU-CUCGCUUCCAUCUCA 3'  
:: ::::: :::::  
query 3' GACGAGCAAAAGGUUGGAGU 5'  
query=miR5177, target=R03G\_10655, score=4, range=542-560, strand=  
target 5' CUGCUC-UUUUCCGUCCUCA 3'  
::::: ::::: :::::  
query 3' GACGAGCAAAAGGUUGGAGU 5'  
query=miR5177, target=R03G\_04265, score=4, range=1244-1264, stran  
target 5' CUGCUAGAUUUCCAUCUCA 3'  
::::: : ::::: :::::  
query 3' GACGAGCAAAAGGU-UGGAGU 5'  
query=miR5177, target=R03G\_14671, score=4, range=288-308, strand=  
target 5' UUGCUUGAUUUUCAACCUUA 3'  
.::::: ::::: :::::  
query 3' GACGAGC-AAAAGGUUGGAGU 5'  
query=miR5177, target=R03G\_01404, score=4, range=720-739, strand=  
target 5' CUUUUUGUUUUUCAACCUUCU 3'  
:: .::::: :::::  
query 3' GACGAGCAAAAGGUUGGAGU 5'  
query=miR5177, target=R03G\_07652, score=4, range=3246-3265, stran  
target 5' UUGUCCUUUUACAACCUCA 3'  
.::::: ::::: :::::  
query 3' GACGAGCAAAAGGUUGGAGU 5'  
query=miR5177, target=R03G\_08766, score=4, range=900-919, strand=  
target 5' CUGCUAGUUUGCCAACCUCC 3'  
::::: ::::: :::::  
query 3' GACGAGCAAAAGGUUGGAGU 5'  
query=miR6248, target=R03G\_04050, score=0, range=1302-1321, stran  
target 5' CACUAACCUCCACCUCAAUA 3'  
::::: ::::: :::::  
query 3' GUGAUUGGAGGUGGAGUUAU 5'  
query=miR6248, target=R03G\_12949, score=0, range=747-766, strand=  
target 5' CACUAACCUCCACCUCAAUA 3'  
::::: ::::: :::::

query 3' GUGAUUGGAGGUGGAGUUAU 5'  
query=miR6248, target=R03G\_00301, score=0, range=2586-2605, stran  
target 5' CACUAACCUCCACCUCAAUA 3'  
.....  
query 3' GUGAUUGGAGGUGGAGUUAU 5'  
query=miR6248, target=R03G\_09585, score=2.5, range=141-160, stran  
target 5' CUUUCACCUCCACCUCAAUA 3'  
: .: .....  
query 3' GUGAUUGGAGGUGGAGUUAU 5'  
query=miR6248, target=R03G\_04538, score=3, range=1576-1595, stran  
target 5' AACCAACCUCCACCUCAAUC 3'  
:: .....  
query 3' GUGAUUGGAGGUGGAGUUAU 5'  
query=miR6248, target=R03G\_14139, score=3.5, range=242-260, stran  
target 5' CAUUGACCUCCACCUCAUG 3'  
.....: ..  
query 3' GUGAUUGGAGGUGGAGUUAU 5'  
query=miR6248, target=R03G\_10206, score=4, range=405-425, strand=  
target 5' CAUCUGGCCACCACCUCAAUA 3'  
:: .....  
query 3' GU-GAUUGGAGGUGGAGUUAU 5'  
query=miR6248, target=R03G\_00949, score=4, range=2027-2045, stran  
target 5' CAC-AACCUCCACCACAAUC 3'  
::: .....  
query 3' GUGAUUGGAGGUGGAGUUAU 5'  
query=miR6248, target=R03G\_00796, score=4, range=419-437, strand=  
target 5' CACU-UCCUCCACCUCGAUC 3'  
:::: .....  
query 3' GUGAUUGGAGGUGGAGUUAU 5'  
query=miR6248, target=R03G\_01339, score=4, range=419-437, strand=  
target 5' CACU-UCCUCCACCUCGAUC 3'  
:::: .....  
query 3' GUGAUUGGAGGUGGAGUUAU 5'  
query=miR6248, target=R03G\_00107, score=4, range=345-364, strand=  
target 5' CAUUGACCUCUACUCAAUU 3'  
.....  
query 3' GUGAUUGGAGGUGGAGUUAU 5'  
query=miR6248, target=R03G\_07692, score=4, range=876-895, strand=  
target 5' CAGGGAACUCCACCUCAAUG 3'  
:: .: .....  
query 3' GUGAUUGGAGGUGGAGUUAU 5'  
query=miR6221-5p, target=R03G\_04120, score=0, range=747-768, stra  
target 5' AGACAGCGGGCCAGAAGACAGA 3'  
.....  
query 3' UCUGUCGCCCCGUCUUCUGUCU 5'

```
query=miR6221-5p, target=R03G_13224, score=0, range=747-768, str
target 5' AGACAGCGGGCCAGAAGACAGA 3'
::::::::::::::::::::::::::
query 3' UCUGUCGCCCCGGUCUUCUGUCU 5'
query=miR6221-5p, target=R03G_04123, score=0, range=747-768, str
target 5' AGACAGCGGGCCAGAAGACAGA 3'
::::::::::::::::::::::::::
query 3' UCUGUCGCCCCGGUCUUCUGUCU 5'
query=miR6221-5p, target=R03G_17093, score=0, range=507-528, str
target 5' AGACAGCGGGCCAGAAGACAGA 3'
::::::::::::::::::::::::::
query 3' UCUGUCGCCCCGGUCUUCUGUCU 5'
query=miR6221-5p, target=R03G_13221, score=2, range=747-768, str
target 5' AGACAGCGGACCAGAAGACAGA 3'
:::::::::::: ::::::::::::::
query 3' UCUGUCGCCCCGGUCUUCUGUCU 5'
query=miR6221-5p, target=R03G_01231, score=4, range=889-909, str
target 5' UGAGAGCGGGCCA-AAGACAGA 3'
:: :::::::::::::: ::::::::::::::
query 3' UCUGUCGCCCCGGUCUUCUGUCU 5'
query=miR6221-5p, target=R03G_01237, score=4, range=544-564, str
target 5' UGAGAGCGGGCCA-AAGACAGA 3'
:: :::::::::::::: ::::::::::::::
query 3' UCUGUCGCCCCGGUCUUCUGUCU 5'
query=miR1849, target=R03G_15157, score=0, range=555-573, strand=
target 5' ACCAACCUAUGAUACGCUA 3'
::::::::::::::::::::::::::
query 3' UGGUUGGAUACUAUGCGAU 5'
query=miR1849, target=R03G_16810, score=0, range=198-216, strand=
target 5' ACCAACCUAUGAUACGCUA 3'
::::::::::::::::::::::::::
query 3' UGGUUGGAUACUAUGCGAU 5'
query=miR1849, target=R03G_04676, score=0, range=555-573, strand=
target 5' ACCAACCUAUGAUACGCUA 3'
::::::::::::::::::::::::::
query 3' UGGUUGGAUACUAUGCGAU 5'
query=miR1849, target=R03G_12005, score=0, range=555-573, strand=
target 5' ACCAACCUAUGAUACGCUA 3'
::::::::::::::::::::::::::
query 3' UGGUUGGAUACUAUGCGAU 5'
query=miR1849, target=R03G_11407, score=0, range=138-156, strand=
target 5' ACCAACCUAUGAUACGCUA 3'
::::::::::::::::::::::::::
query 3' UGGUUGGAUACUAUGCGAU 5'
query=miR1849, target=R03G_12080, score=0, range=138-156, strand=
```

target 5' ACCAACCUAUGAUACGCUA 3'  
:::::::::::::::::::  
query 3' UGGUUGGAUACUAUGCGAU 5'  
query=miR1849, target=R03G\_05928, score=0, range=327-345, strand=  
target 5' ACCAACCUAUGAUACGCUA 3'  
:::::::::::::::::::  
query 3' UGGUUGGAUACUAUGCGAU 5'  
query=miR1849, target=R03G\_11953, score=2.5, range=432-450, stran  
target 5' ACCAGCCUAUGAUGCGCUC 3'  
:::::::::::::::::::  
query 3' UGGUUGGAUACUAUGCGAU 5'  
query=miR1849, target=R03G\_07678, score=2.5, range=555-573, stran  
target 5' ACCAGCCUAUGAUGCGCUC 3'  
:::::::::::::::::::  
query 3' UGGUUGGAUACUAUGCGAU 5'  
query=miR1849, target=R03G\_07110, score=2.5, range=555-573, stran  
target 5' ACCAGCCUAUGAUGCGCUC 3'  
:::::::::::::::::::  
query 3' UGGUUGGAUACUAUGCGAU 5'  
query=miR1849, target=R03G\_10525, score=2.5, range=555-573, stran  
target 5' ACCAGCCUAUGAUGCGCUC 3'  
:::::::::::::::::::  
query 3' UGGUUGGAUACUAUGCGAU 5'  
query=miR1849, target=R03G\_07676, score=2.5, range=555-573, stran  
target 5' ACCAGCCUAUGAUGCGCUC 3'  
:::::::::::::::::::  
query 3' UGGUUGGAUACUAUGCGAU 5'  
query=miR1849, target=R03G\_01968, score=2.5, range=555-573, stran  
target 5' ACCAGCCUAUGAUGCGCUC 3'  
:::::::::::::::::::  
query 3' UGGUUGGAUACUAUGCGAU 5'  
query=miR1849, target=R03G\_10531, score=2.5, range=555-573, stran  
target 5' ACCAGCCUAUGAUGCGCUC 3'  
:::::::::::::::::::  
query 3' UGGUUGGAUACUAUGCGAU 5'  
query=miR1849, target=R03G\_17380, score=2.5, range=555-573, stran  
target 5' ACCAGCCUAUGAUGCGCUC 3'  
:::::::::::::::::::  
query 3' UGGUUGGAUACUAUGCGAU 5'  
query=miR1849, target=R03G\_05523, score=2.5, range=555-573, stran  
target 5' ACCAGCCUAUGAUGCGCUC 3'  
:::::::::::::::::::  
query 3' UGGUUGGAUACUAUGCGAU 5'  
query=miR1849, target=R03G\_03767, score=2.5, range=555-573, stran  
target 5' ACCAGCCUAUGAUGCGCUC 3'

query 3' UGGUUGGAUACUAUGCGAU 5'  
query=miR1849, target=R03G\_01949, score=2.5, range=555-573, stran  
target 5' ACCAGCCUAUGAUGCGCUC 3'

query 3' UGGUUGGAUACUAUGCGAU 5'  
query=miR1849, target=R03G\_10545, score=2.5, range=555-573, stran  
target 5' ACCAGCCUAUGAUGCGCUC 3'

query 3' UGGUUGGAUACUAUGCGAU 5'  
query=miR1849, target=R03G\_12960, score=2.5, range=216-234, stran  
target 5' ACCAGCCUAUGAUGCGCUC 3'

query 3' UGGUUGGAUACUAUGCGAU 5'  
query=miR1849, target=R03G\_12974, score=2.5, range=216-234, stran  
target 5' ACCAGCCUAUGAUGCGCUC 3'

query 3' UGGUUGGAUACUAUGCGAU 5'  
query=miR1849, target=R03G\_04668, score=3.5, range=63-82, strand=  
target 5' AUCAACCUAUGAUAAUUGCUA 3'

query 3' UGGUUGGAUACUAU-GCGAU 5'  
query=miR1849, target=R03G\_00874, score=3.5, range=1654-1671, str  
target 5' AUCAACCU-UGAUACGCUU 3'

query 3' UGGUUGGAUACUAUGCGAU 5'  
query=miR1849, target=R03G\_14802, score=3.5, range=1841-1859,  
strand=-1  
target 5' ACUAUCUUAUGAUUAUGCUA 3'

query 3' UGGUUGGAUACUAUGCGAU 5'  
query=miR1849, target=R03G\_09606, score=3.5, range=1169-1187,  
strand=-1  
target 5' ACUAUCUUAUGAUUAUGCUA 3'

query 3' UGGUUGGAUACUAUGCGAU 5'  
query=miR1849, target=R03G\_14706, score=3.5, range=1799-1817,  
strand=-1  
target 5' ACUAUCUUAUGAUUAUGCUA 3'

query 3' UGGUUGGAUACUAUGCGAU 5'  
query=miR1849, target=R03G\_02953, score=3.5, range=1913-1931,  
strand=-1  
target 5' ACUAUCUUAUGAUUAUGCUA 3'

query 3' UGGUUGGAUACUAUGCGAU 5'  
query=miR1849, target=R03G\_01303, score=3.5, range=2012-2030,  
strand=-1  
target 5' ACUAUCUUAUGAUAUGCUA 3'  
::: :::::::::::::::  
query 3' UGGUUGGAUACUAUGCGAU 5'  
query=miR1849, target=R03G\_05338, score=3.5, range=347-365, stran  
target 5' ACUAUCUUAUGAUAUGCUA 3'  
::: :::::::::::::::  
query 3' UGGUUGGAUACUAUGCGAU 5'  
query=miR1849, target=R03G\_10561, score=3.5, range=347-365, stran  
target 5' ACUAUCUUAUGAUAUGCUA 3'  
::: :::::::::::::::  
query 3' UGGUUGGAUACUAUGCGAU 5'  
query=miR1849, target=R03G\_12463, score=3.5, range=191-209, stran  
target 5' ACUAUCUUAUGAUAUGCUA 3'  
::: :::::::::::::::  
query 3' UGGUUGGAUACUAUGCGAU 5'  
query=miR1849, target=R03G\_17398, score=3.5, range=2012-2030,  
strand=-1  
target 5' ACUAUCUUAUGAUAUGCUA 3'  
::: :::::::::::::::  
query 3' UGGUUGGAUACUAUGCGAU 5'  
query=miR1849, target=R03G\_04802, score=3.5, range=1253-1271,  
strand=-1  
target 5' ACUAUCUUAUGAUAUGCUA 3'  
::: :::::::::::::::  
query 3' UGGUUGGAUACUAUGCGAU 5'  
query=miR1849, target=R03G\_12489, score=3.5, range=46-64, strand=  
target 5' ACAAGCCUAUGAUGCGCUC 3'  
:: :::::::::::::::  
query 3' UGGUUGGAUACUAUGCGAU 5'  
query=miR1849, target=R03G\_07870, score=4, range=1473-1492, stran  
target 5' UCCAUCCUAUGAUAUCGCUA 3'  
::: :::::::::::::: :::::  
query 3' UGGUUGGAUACUAU-GCGAU 5'  
query=miR1849, target=R03G\_15867, score=4, range=1473-1492, stran  
target 5' UCCAUCCUAUGAUAUCGCUA 3'  
::: :::::::::::::: :::::  
query 3' UGGUUGGAUACUAU-GCGAU 5'  
query=miR1849, target=R03G\_05417, score=4, range=825-844, strand=  
target 5' UCCAUCCUAUGAUAUCGCUA 3'  
::: :::::::::::::: :::::  
query 3' UGGUUGGAUACUAU-GCGAU 5'  
query=miR1849, target=R03G\_17442, score=4, range=1500-1519, stran

target 5' UCCAUCCUAUGAUUUCGCUA 3'  
::: ::::::::::: :::::  
query 3' UGGUUGGAUACUUAU-GCGAU 5'  
query=miR3627-3p, target=R03G\_12527, score=0, range=1323-1344,  
strand=-1  
target 5' CUUGUCACGAGGACAGCGAGCA 3'  
:::::::::::::::::::::::::::  
query 3' GAACAGUGCUCCUGUCGCUCGU 5'  
query=miR3627-3p, target=R03G\_14347, score=0, range=1317-1338,  
strand=-1  
target 5' CUUGUCACGAGGACAGCGAGCA 3'  
:::::::::::::::::::::::::::  
query 3' GAACAGUGCUCCUGUCGCUCGU 5'  
query=miR3627-3p, target=R03G\_16361, score=0, range=1317-1338,  
strand=-1  
target 5' CUUGUCACGAGGACAGCGAGCA 3'  
:::::::::::::::::::::::::::  
query 3' GAACAGUGCUCCUGUCGCUCGU 5'  
query=miR3627-3p, target=R03G\_09547, score=0, range=1317-1338,  
strand=-1  
target 5' CUUGUCACGAGGACAGCGAGCA 3'  
:::::::::::::::::::::::::::  
query 3' GAACAGUGCUCCUGUCGCUCGU 5'  
query=miR3627-3p, target=R03G\_06425, score=0, range=1317-1338,  
strand=-1  
target 5' CUUGUCACGAGGACAGCGAGCA 3'  
:::::::::::::::::::::::::::  
query 3' GAACAGUGCUCCUGUCGCUCGU 5'  
query=miR3627-3p, target=R03G\_12677, score=0, range=1317-1338,  
strand=-1  
target 5' CUUGUCACGAGGACAGCGAGCA 3'  
:::::::::::::::::::::::::::  
query 3' GAACAGUGCUCCUGUCGCUCGU 5'  
query=miR3627-3p, target=R03G\_17021, score=0, range=1317-1338,  
strand=-1  
target 5' CUUGUCACGAGGACAGCGAGCA 3'  
:::::::::::::::::::::::::::  
query 3' GAACAGUGCUCCUGUCGCUCGU 5'  
query=miR3627-3p, target=R03G\_02704, score=0, range=1317-1338,  
strand=-1  
target 5' CUUGUCACGAGGACAGCGAGCA 3'  
:::::::::::::::::::::::::::  
query 3' GAACAGUGCUCCUGUCGCUCGU 5'  
query=miR3627-3p, target=R03G\_05330, score=0, range=1317-1338,  
strand=-1





```

:::::::::::::::::::: ::
query 3' GAACAGUGCUCCUGUCGUCUGU 5'
query=miR3627-3p, target=R03G_16539, score=2, range=1215-1236,
strand=-1
target 5' CUUGUCACGAGGACAGCGAACA 3'
:::::::::::::::::::: ::
query 3' GAACAGUGCUCCUGUCGUCUGU 5'
query=miR3627-3p, target=R03G_12538, score=2, range=1215-1236,
strand=-1
target 5' CUUGUCACGAGGACAGCGAACA 3'
:::::::::::::::::::: ::
query 3' GAACAGUGCUCCUGUCGUCUGU 5'
query=miR3627-3p, target=R03G_09493, score=2, range=108-129, stra
target 5' CUUGUCACGAGGACAGCGAACA 3'
:::::::::::::::::::: ::
query 3' GAACAGUGCUCCUGUCGUCUGU 5'
query=miR3627-3p, target=R03G_02082, score=4, range=186-206, stra
target 5' AUUGUCA-GAGGACAGCGAGAA 3'
:::::: : ::::: :
query 3' GAACAGUGCUCCUGUCGUCUGU 5'
query=miR3627-3p, target=R03G_03629, score=4, range=53-73, strand
target 5' CUUGAAAC-AGGACAGCGAGUA 3'
:::: : ::::: :
query 3' GAACAGUGCUCCUGUCGUCUGU 5'
query=miR9560b-3p, target=R03G_11767, score=0, range=1250-1272,
strand=-1
target 5' AGCACGAGUAGAACUAAGAGUGA 3'
:::::::::::::::::::: :
query 3' UCGUGCUCUUCUUGAUUCUCACU 5'
query=miR9560b-3p, target=R03G_17150, score=1, range=2096-2118,
strand=-1
target 5' AUCACGAGUAGAACUAAGAGUGA 3'
: ::::: :
query 3' UCGUGCUCUUCUUGAUUCUCACU 5'
query=miR9560b-3p, target=R03G_06111, score=4, range=34-56, stran
target 5' AGCAAGCACAGAACUAAGAGUGA 3'
:::: : ::::: :
query 3' UCGUGCUCUUCUUGAUUCUCACU 5'
query=miR1047-3p, target=R03G_15127, score=0, range=1264-1283,
strand=1
target 5' CAACUGAAGUAUGCUGAUCA 3'
:::::::::::::::::::: :
query 3' GUUGACUUCUACGACUAGU 5'
query=miR1047-3p, target=R03G_00249, score=3, range=73-92, strand
target 5' CAGCUGGAGUACGCUGAUCA 3'

```

```
..... :
query 3' GUUGACUUCAUACGACUAGU 5'
query=miR1047-3p, target=R03G_02142, score=3, range=1780-1799,
strand=1
target 5' CAACUGAAGUAUCCUGAUCC 3'
..... :
query 3' GUUGACUUCAUACGACUAGU 5'
query=miR1047-3p, target=R03G_13898, score=3.5, range=351-370,
strand=1
target 5' CAUCUUGGGUAUGCUGAUCA 3'
:: .. :
query 3' GUUGACUUCAUACGACUAGU 5'
query=miR1047-3p, target=R03G_13579, score=3.5, range=1014-1033,
strand=1
target 5' UCACAAAAGUAUGCUGAUCA 3'
. :: :
query 3' GUUGACUUCAUACGACUAGU 5'
query=miR1047-3p, target=R03G_07101, score=4, range=138-157, stra
target 5' UAACUUGAGUAUGUUGGUCA 3'
..... :
query 3' GUUGACUUCAUACGACUAGU 5'
query=miR1047-3p, target=R03G_14254, score=4, range=108-127, stra
target 5' CAACUGAAGUAUGCUGGGCC 3'
..... :
query 3' GUUGACUUCAUACGACUAGU 5'
query=miR1047-3p, target=R03G_06153, score=4, range=1467-1486,
strand=-1
target 5' CAUCUGAAGCAUGUUGAUCA 3'
:: ..... :
query 3' GUUGACUUCAUACGACUAGU 5'
query=miR1047-3p, target=R03G_08744, score=4, range=108-127, stra
target 5' CAACCGAAGUAUGCUGAGCC 3'
:::: ..... :
query 3' GUUGACUUCAUACGACUAGU 5'
query=miR5176-5p, target=R03G_10860, score=0, range=576-595, stra
target 5' GAGAUGUGACACAUGGAAUA 3'
..... :
query 3' CUCUACACUGUGUACCUUUAU 5'
query=miR5176-5p, target=R03G_17289, score=0, range=576-595, stra
target 5' GAGAUGUGACACAUGGAAUA 3'
..... :
query 3' CUCUACACUGUGUACCUUUAU 5'
query=miR5176-5p, target=R03G_07729, score=0, range=345-364, stra
target 5' GAGAUGUGACACAUGGAAUA 3'
..... :
```

query 3' CUCUACACUGUGUACCUUUAU 5'  
query=miR5176-5p, target=R03G\_08111, score=0, range=576-595, strand=1  
target 5' GAGAUGUGACACAUGGAAUA 3'  
.....  
query 3' CUCUACACUGUGUACCUUUAU 5'  
query=miR5176-5p, target=R03G\_02682, score=0, range=576-595, strand=1  
target 5' GAGAUGUGACACAUGGAAUA 3'  
.....  
query 3' CUCUACACUGUGUACCUUUAU 5'  
query=miR5176-5p, target=R03G\_12182, score=0, range=576-595, strand=1  
target 5' GAGAUGUGACACAUGGAAUA 3'  
.....  
query 3' CUCUACACUGUGUACCUUUAU 5'  
query=miR5176-5p, target=R03G\_11784, score=0.5, range=576-595, strand=1  
target 5' GAGAUGUGACACAUGGAAUG 3'  
.....  
query 3' CUCUACACUGUGUACCUUUAU 5'  
query=miR5176-5p, target=R03G\_12541, score=0.5, range=576-595, strand=1  
target 5' GAGAUGUGACACAUGGAAUG 3'  
.....  
query 3' CUCUACACUGUGUACCUUUAU 5'  
query=miR5176-5p, target=R03G\_09496, score=0.5, range=576-595, strand=1  
target 5' GAGAUGUGACACAUGGAAUG 3'  
.....  
query 3' CUCUACACUGUGUACCUUUAU 5'  
query=miR5176-5p, target=R03G\_11272, score=0.5, range=576-595, strand=1  
target 5' GAGAUGUGACACAUGGAAUG 3'  
.....  
query 3' CUCUACACUGUGUACCUUUAU 5'  
query=miR5176-5p, target=R03G\_15862, score=0.5, range=576-595, strand=1  
target 5' GAGAUGUGACACAUGGAAUG 3'  
.....  
query 3' CUCUACACUGUGUACCUUUAU 5'  
query=miR5176-5p, target=R03G\_13916, score=0.5, range=576-595, strand=1  
target 5' GAGAUGUGACACAUGGAAUG 3'  
.....  
query 3' CUCUACACUGUGUACCUUUAU 5'  
query=miR5176-5p, target=R03G\_15274, score=0.5, range=576-595, strand=1





query 3' ACCGGUCGUAUGAGAGGACU 5'  
query=miR8602, target=R03G\_04790, score=0, range=190-209, strand=  
target 5' UGGCCAGCAUACUCUCCUGA 3'

query 3' ACCGGUCGUAUGAGAGGACU 5'  
query=miR8602, target=R03G\_05935, score=0, range=190-209, strand=  
target 5' UGGCCAGCAUACUCUCCUGA 3'

query 3' ACCGGUCGUAUGAGAGGACU 5'  
query=miR8602, target=R03G\_03593, score=0, range=190-209, strand=  
target 5' UGGCCAGCAUACUCUCCUGA 3'

query 3' ACCGGUCGUAUGAGAGGACU 5'  
query=miR8602, target=R03G\_01589, score=0, range=190-209, strand=  
target 5' UGGCCAGCAUACUCUCCUGA 3'

query 3' ACCGGUCGUAUGAGAGGACU 5'  
query=miR8602, target=R03G\_03626, score=0, range=190-209, strand=  
target 5' UGGCCAGCAUACUCUCCUGA 3'

query 3' ACCGGUCGUAUGAGAGGACU 5'  
query=miR8602, target=R03G\_13863, score=0, range=484-503, strand=  
target 5' UGGCCAGCAUACUCUCCUGA 3'

query 3' ACCGGUCGUAUGAGAGGACU 5'  
query=miR8602, target=R03G\_11527, score=0, range=190-209, strand=  
target 5' UGGCCAGCAUACUCUCCUGA 3'

query 3' ACCGGUCGUAUGAGAGGACU 5'  
query=miR8602, target=R03G\_00678, score=0, range=154-173, strand=  
target 5' UGGCCAGCAUACUCUCCUGA 3'

query 3' ACCGGUCGUAUGAGAGGACU 5'  
query=miR8602, target=R03G\_14547, score=0.5, range=190-209, stran  
target 5' UGGCUAGCAUACUCUCCUGA 3'

query 3' ACCGGUCGUAUGAGAGGACU 5'  
query=miR8602, target=R03G\_13921, score=1, range=190-209, strand=  
target 5' UGGCCAGCAUACUCUCUUGA 3'

query 3' ACCGGUCGUAUGAGAGGACU 5'  
query=miR8602, target=R03G\_17459, score=1, range=190-209, strand=  
target 5' UGGUCAGCAUACUCUCCUGG 3'

query 3' ACCGGUCGUAUGAGAGGACU 5'  
query=miR8602, target=R03G\_10734, score=1, range=190-209, strand=  
target 5' UGGUCAGCAUACUCUCCUGG 3'  
.....  
query 3' ACCGGUCGUAUGAGAGGACU 5'  
query=miR8602, target=R03G\_15166, score=3, range=790-809, strand=  
target 5' UGGCCAGCAUAUUCACCUGA 3'  
.....  
query 3' ACCGGUCGUAUGAGAGGACU 5'  
query=miR8602, target=R03G\_07577, score=3, range=142-161, strand=  
target 5' UGGCCAGCAUAUUCACCUGA 3'  
.....  
query 3' ACCGGUCGUAUGAGAGGACU 5'  
query=miR8602, target=R03G\_05940, score=3, range=499-518, strand=  
target 5' UGGCCAGCAUAUUCACCUGA 3'  
.....  
query 3' ACCGGUCGUAUGAGAGGACU 5'  
query=miR8602, target=R03G\_16536, score=3, range=103-122, strand=  
target 5' UGGCCAGCAUAUUCGCCUGA 3'  
.....  
query 3' ACCGGUCGUAUGAGAGGACU 5'  
query=miR8602, target=R03G\_00237, score=3, range=259-278, strand=  
target 5' UGGCCAGCAUAUUCACCUGA 3'  
.....  
query 3' ACCGGUCGUAUGAGAGGACU 5'  
query=miR8602, target=R03G\_15895, score=4, range=103-122, strand=  
target 5' UGGCCAGUAUAUUCACCUGA 3'  
.....  
query 3' ACCGGUCGUAUGAGAGGACU 5'  
query=miR8602, target=R03G\_04692, score=4, range=142-161, strand=  
target 5' UGGCCAGUAUAUUCACCUGA 3'  
.....  
query 3' ACCGGUCGUAUGAGAGGACU 5'  
query=miR8602, target=R03G\_17207, score=4, range=142-161, strand=  
target 5' UGGCCAGUAUAUUCACCUGA 3'  
.....  
query 3' ACCGGUCGUAUGAGAGGACU 5'  
query=miR8602, target=R03G\_07783, score=4, range=658-677, strand=  
target 5' UGCACAGCAUUCUCUCCUGA 3'  
:: .....  
query 3' ACCGGUCGUAUGAGAGGACU 5'  
query=miR8602, target=R03G\_01430, score=4, range=922-941, strand=  
target 5' UUGCCCCCAUAUUCUCCUGA 3'  
: ::: .....  
query 3' ACCGGUCGUAUGAGAGGACU 5'



query=miR8602, target=R03G\_16443, score=4, range=124-143, strand=  
target 5' UUGCCUCCAUAUUCUCCUGA 3'  
: ::: :::::.....  
query 3' ACCGGUCGUAUGAGAGGACU 5'  
query=miR7814, target=R03G\_06442, score=0, range=3852-3873, stran  
target 5' UCAAAGCAUCAAAAGACAUAUUA 3'  
:.....  
query 3' AGUUUCGUAGUUUCUGUAUAAU 5'  
query=miR7814, target=R03G\_09965, score=0, range=3195-3216, stran  
target 5' UCAAAGCAUCAAAAGACAUAUUA 3'  
:.....  
query 3' AGUUUCGUAGUUUCUGUAUAAU 5'  
query=miR7814, target=R03G\_13867, score=0, range=3111-3132, stran  
target 5' UCAAAGCAUCAAAAGACAUAUUA 3'  
:.....  
query 3' AGUUUCGUAGUUUCUGUAUAAU 5'  
query=miR7814, target=R03G\_02959, score=0, range=3195-3216, stran  
target 5' UCAAAGCAUCAAAAGACAUAUUA 3'  
:.....  
query 3' AGUUUCGUAGUUUCUGUAUAAU 5'  
query=miR7814, target=R03G\_15250, score=0, range=3150-3171, stran  
target 5' UCAAAGCAUCAAAAGACAUAUUA 3'  
:.....  
query 3' AGUUUCGUAGUUUCUGUAUAAU 5'  
query=miR7814, target=R03G\_17371, score=0, range=3150-3171, stran  
target 5' UCAAAGCAUCAAAAGACAUAUUA 3'  
:.....  
query 3' AGUUUCGUAGUUUCUGUAUAAU 5'  
query=miR7814, target=R03G\_06427, score=0, range=2787-2808, stran  
target 5' UCAAAGCAUCAAAAGACAUAUUA 3'  
:.....  
query 3' AGUUUCGUAGUUUCUGUAUAAU 5'  
query=miR7814, target=R03G\_17326, score=0, range=3027-3048, stran  
target 5' UCAAAGCAUCAAAAGACAUAUUA 3'  
:.....  
query 3' AGUUUCGUAGUUUCUGUAUAAU 5'  
query=miR7814, target=R03G\_06428, score=0, range=2289-2310, stran  
target 5' UCAAAGCAUCAAAAGACAUAUUA 3'  
:.....  
query 3' AGUUUCGUAGUUUCUGUAUAAU 5'  
query=miR7814, target=R03G\_13749, score=0, range=1758-1779, stran  
target 5' UCAAAGCAUCAAAAGACAUAUUA 3'  
:.....  
query 3' AGUUUCGUAGUUUCUGUAUAAU 5'  
query=miR7814, target=R03G\_05619, score=0, range=1338-1359, stran



query 3' AGUUUCGUAGUUUCUGUAUAAU 5'  
query=miR7814, target=R03G\_00306, score=2, range=1491-1512, stran  
target 5' UCAAAGCAUCAAAAGACAUAUCA 3'  
query 3' AGUUUCGUAGUUUCUGUAUAAU 5'  
query=miR7814, target=R03G\_01330, score=2, range=429-450, strand=  
target 5' UCAAAGCAUCAAAAGACAUAUCA 3'  
query 3' AGUUUCGUAGUUUCUGUAUAAU 5'  
query=miR6116-3p, target=R03G\_12001, score=0, range=785-806, stra  
target 5' CUA AUGCUUGGAUGACAAAUGA 3'  
query 3' GAUUACGAACCUACUGUUUACU 5'  
query=miR6116-3p, target=R03G\_10556, score=0, range=785-806, stra  
target 5' CUA AUGCUUGGAUGACAAAUGA 3'  
query 3' GAUUACGAACCUACUGUUUACU 5'  
query=miR6116-3p, target=R03G\_17369, score=0, range=785-806, stra  
target 5' CUA AUGCUUGGAUGACAAAUGA 3'  
query 3' GAUUACGAACCUACUGUUUACU 5'  
query=miR6116-3p, target=R03G\_15681, score=0, range=44-65, strand  
target 5' CUA AUGCUUGGAUGACAAAUGA 3'  
query 3' GAUUACGAACCUACUGUUUACU 5'  
query=miR6116-3p, target=R03G\_13488, score=0, range=44-65, strand  
target 5' CUA AUGCUUGGAUGACAAAUGA 3'  
query 3' GAUUACGAACCUACUGUUUACU 5'  
query=miR6116-3p, target=R03G\_13491, score=0, range=44-65, strand  
target 5' CUA AUGCUUGGAUGACAAAUGA 3'  
query 3' GAUUACGAACCUACUGUUUACU 5'  
query=miR6116-3p, target=R03G\_05824, score=0, range=44-65, strand  
target 5' CUA AUGCUUGGAUGACAAAUGA 3'  
query 3' GAUUACGAACCUACUGUUUACU 5'  
query=miR6116-3p, target=R03G\_03517, score=0, range=44-65, strand  
target 5' CUA AUGCUUGGAUGACAAAUGA 3'  
query 3' GAUUACGAACCUACUGUUUACU 5'  
query=miR6116-3p, target=R03G\_03518, score=0, range=44-65, strand  
target 5' CUA AUGCUUGGAUGACAAAUGA 3'



query=miR5065, target=R03G\_11357, score=4, range=26-44, strand=-1  
target 5' AAGGUAUAAGUAAGACCUC 3'  
:: ::::::::::: ::  
query 3' UUACAUAUUCAUUC-GGAU 5'  
query=miR5645a, target=R03G\_17150, score=0, range=89-108, strand=  
target 5' CUUAACGCCGUGACUGCAAA 3'  
:::::::::::::::::::::  
query 3' GAAUUGCGGCACUGACGUUU 5'  
query=miR6473, target=R03G\_10651, score=0, range=614-632, strand=  
target 5' AACUCUUUGGCAUUGUGGA 3'  
:::::::::::::::::::::  
query 3' UUGAGAAACCGUAACACCU 5'  
query=miR6473, target=R03G\_13601, score=3, range=879-897, strand=  
target 5' AAUUUUUUGGCAUUGAGGA 3'  
:.....: ::  
query 3' UUGAGAAACCGUAACACCU 5'  
query=miR6473, target=R03G\_03503, score=3, range=617-635, strand=  
target 5' AGUUCUUUGGCAUUGUGAA 3'  
:.....: :  
query 3' UUGAGAAACCGUAACACCU 5'  
query=miR6473, target=R03G\_11680, score=3, range=972-989, strand=  
target 5' AAAUCUUUGGCAUU-UGGA 3'  
:: ::::::::::: ::::  
query 3' UUGAGAAACCGUAACACCU 5'  
query=miR6473, target=R03G\_05738, score=3.5, range=388-406, stran  
target 5' AUCUUUUUGGCAUUUUGGA 3'  
: ::::::::::: ::::  
query 3' UUGAGAAACCGUAACACCU 5'  
query=miR6473, target=R03G\_05727, score=3.5, range=388-406, stran  
target 5' AUCUUUUUGGCAUUUUGGA 3'  
: ::::::::::: ::::  
query 3' UUGAGAAACCGUAACACCU 5'  
query=miR6473, target=R03G\_05229, score=3.5, range=423-440, stran  
target 5' AUCUC-UUGGUUUUGUGGG 3'  
: ::: :::::::::::  
query 3' UUGAGAAACCGUAACACCU 5'  
query=miR6473, target=R03G\_01384, score=3.5, range=179-196, stran  
target 5' AACUC-UUGGAAUUGUGGG 3'  
: :::: ::::: :::::::::::  
query 3' UUGAGAAACCGUAACACCU 5'  
query=miR6473, target=R03G\_04420, score=3.5, range=74-92, strand=  
target 5' CAUUCUUUGGCAUUGAGGA 3'  
:.....: ::  
query 3' UUGAGAAACCGUAACACCU 5'  
query=miR6473, target=R03G\_01452, score=3.5, range=477-495, stran

target 5' AGCACAUUGGUAUUGUGGA 3'  
:: : ::::::::::::::  
query 3' UUGAGAAACCGUAACACCU 5'  
query=miR6473, target=R03G\_16362, score=3.5, range=2592-2610,  
strand=-1  
target 5' AGCCAAUUGGCAUUGUGGA 3'  
:: : ::::::::::::::  
query 3' UUGAGAAACCGUAACACCU 5'  
query=miR6473, target=R03G\_11493, score=4, range=682-699, strand=  
target 5' CAUUUUUUGGC-UUGUGGA 3'  
:.....: :.....:  
query 3' UUGAGAAACCGUAACACCU 5'  
query=miR6473, target=R03G\_01660, score=4, range=986-1004, strand  
target 5' GACUGUUUGGCAUUGUUGG 3'  
.:::: :.....: :.  
query 3' UUGAGAAACCGUAACACCU 5'  
query=miR6473, target=R03G\_02589, score=4, range=951-969, strand=  
target 5' AAGUCGUUGGUAUUGUGGU 3'  
:: :: :.....: :  
query 3' UUGAGAAACCGUAACACCU 5'  
query=miR6473, target=R03G\_16173, score=4, range=222-239, strand=  
target 5' AAGUUUUUGGCAUU-UGGG 3'  
:: :.....: :.  
query 3' UUGAGAAACCGUAACACCU 5'  
query=miR6473, target=R03G\_10811, score=4, range=137-154, strand=  
target 5' AAC-AUUUGGCAUUGUGAA 3'  
::: :.....: :  
query 3' UUGAGAAACCGUAACACCU 5'  
query=miR855, target=R03G\_07786, score=3.5, range=879-900, strand  
target 5' CUUCUCU-UCCUJAGCUUGUCUA 3'  
:.... : :.....: :  
query 3' AAGGAAACAGGAAUCGAACAGAU 5'  
query=miR3712, target=R03G\_16744, score=0, range=558-578, strand=  
target 5' UGGUCUUGAUCUUGAUCAGCA 3'  
:.....: :  
query 3' ACCAGAACUAGAACUAGUCGU 5'  
query=miR3712, target=R03G\_01203, score=0, range=558-578, strand=  
target 5' UGGUCUUGAUCUUGAUCAGCA 3'  
:.....: :  
query 3' ACCAGAACUAGAACUAGUCGU 5'  
query=miR3712, target=R03G\_11403, score=0, range=558-578, strand=  
target 5' UGGUCUUGAUCUUGAUCAGCA 3'  
:.....: :  
query 3' ACCAGAACUAGAACUAGUCGU 5'  
query=miR3712, target=R03G\_06416, score=0, range=558-578, strand=



```

::::::::::::::::::::
query 3' ACCAGAACUAGAACUAGUCGU 5'
query=miR3712, target=R03G_08612, score=0, range=558-578, strand=
target 5' UGGUCUUGAUCUUGAUCAGCA 3'
::::::::::::::::::::
query 3' ACCAGAACUAGAACUAGUCGU 5'
query=miR3712, target=R03G_05630, score=0, range=558-578, strand=
target 5' UGGUCUUGAUCUUGAUCAGCA 3'
::::::::::::::::::::
query 3' ACCAGAACUAGAACUAGUCGU 5'
query=miR3712, target=R03G_13450, score=0, range=513-533, strand=
target 5' UGGUCUUGAUCUUGAUCAGCA 3'
::::::::::::::::::::
query 3' ACCAGAACUAGAACUAGUCGU 5'
query=miR3712, target=R03G_13859, score=0, range=183-203, strand=
target 5' UGGUCUUGAUCUUGAUCAGCA 3'
::::::::::::::::::::
query 3' ACCAGAACUAGAACUAGUCGU 5'
query=miR3712, target=R03G_11970, score=0, range=558-578, strand=
target 5' UGGUCUUGAUCUUGAUCAGCA 3'
::::::::::::::::::::
query 3' ACCAGAACUAGAACUAGUCGU 5'
query=miR3712, target=R03G_13152, score=0, range=558-578, strand=
target 5' UGGUCUUGAUCUUGAUCAGCA 3'
::::::::::::::::::::
query 3' ACCAGAACUAGAACUAGUCGU 5'
query=miR3712, target=R03G_03988, score=0, range=558-578, strand=
target 5' UGGUCUUGAUCUUGAUCAGCA 3'
::::::::::::::::::::
query 3' ACCAGAACUAGAACUAGUCGU 5'
query=miR3712, target=R03G_09376, score=0, range=558-578, strand=
target 5' UGGUCUUGAUCUUGAUCAGCA 3'
::::::::::::::::::::
query 3' ACCAGAACUAGAACUAGUCGU 5'
query=miR3712, target=R03G_12194, score=0, range=558-578, strand=
target 5' UGGUCUUGAUCUUGAUCAGCA 3'
::::::::::::::::::::
query 3' ACCAGAACUAGAACUAGUCGU 5'
query=miR3712, target=R03G_07104, score=0, range=558-578, strand=
target 5' UGGUCUUGAUCUUGAUCAGCA 3'
::::::::::::::::::::
query 3' ACCAGAACUAGAACUAGUCGU 5'
query=miR3712, target=R03G_03103, score=1, range=558-578, strand=
target 5' UGAUCUUGAUCUUGAUCAGCA 3'
:: ::::::::::::::::::::::

```



```

query 3' ACCAGAACUAGAACUAGUCGU 5'
query=miR3712, target=R03G_12951, score=2, range=558-578, strand=
target 5' UGGUCUUGAUCUUGAUCAACA 3'
: :
query 3' ACCAGAACUAGAACUAGUCGU 5'
query=miR3712, target=R03G_07433, score=2, range=228-247, strand=
target 5' UGGUCUUGAUCUU-AUCAGCA 3'
: :
query 3' ACCAGAACUAGAACUAGUCGU 5'
query=miR3712, target=R03G_05884, score=3, range=2508-2528, stran
target 5' UCAUCUUCAUCUUGAUCAGCA 3'
: :
query 3' ACCAGAACUAGAACUAGUCGU 5'
query=miR3712, target=R03G_03260, score=3.5, range=150-171, stran
target 5' UUCUUUUGUAUCUUGAUCAGCA 3'
: :
query 3' ACCAGAAC-UAGAACUAGUCGU 5'
query=miR3712, target=R03G_17220, score=4, range=516-536, strand=
target 5' UGGUCUUGAUCUUGAUCUGUC 3'
: :
query 3' ACCAGAACUAGAACUAGUCGU 5'
query=miR3712, target=R03G_05255, score=4, range=407-427, strand=
target 5' UGGCCUUGAUCUUUGUCAGCA 3'
: :
query 3' ACCAGAACUAGAACUAGUCGU 5'
query=miR3712, target=R03G_01597, score=4, range=879-898, strand=
target 5' UGAUCUUGAUUUUGAU-AGCA 3'
: :
query 3' ACCAGAACUAGAACUAGUCGU 5'
query=miR3712, target=R03G_13054, score=4, range=291-311, strand=
target 5' AUGAGUUGAUCUUGAUCAGCA 3'
: :
query 3' ACCAGAACUAGAACUAGUCGU 5'
query=miR3712, target=R03G_08864, score=4, range=1172-1193, stran
target 5' UGGAACUGGAUCUUGGUCAGCA 3'
: :
query 3' ACC-AGAACUAGAACUAGUCGU 5'
query=miR158-5p, target=R03G_14816, score=4, range=593-613, stran
target 5' UUUUGUGAACGAUAGGUAAAA 3'
: :
query 3' AAAAGGUUUGCUAUCCGUUUC 5'
query=miR158-5p, target=R03G_09479, score=4, range=588-608, stran
target 5' AUAUCCAAACGAUACGCAAAG 3'
: :
query 3' AAAAGGUUUGCUAUCCGUUUC 5'

```

query=miR163, target=R03G\_13072, score=0, range=755-777, strand=1  
target 5' ACGAAUCCAUGCUGUCUUCUA 3'  
::::::::::::::::::::::::::  
query 3' UGCUUAAGGUACGACGAGAAGUU 5'  
query=miR163, target=R03G\_15256, score=1, range=851-873, strand=1  
target 5' ACGAAUCCAUGCUGUUCUUCUA 3'  
::::::::::::::::::::::::::  
query 3' UGCUUAAGGUACGACGAGAAGUU 5'  
query=miR163, target=R03G\_10737, score=1, range=851-873, strand=1  
target 5' ACGAAUCCAUGCUGUUCUUCUA 3'  
::::::::::::::::::::::::::  
query 3' UGCUUAAGGUACGACGAGAAGUU 5'  
query=miR163, target=R03G\_00259, score=1, range=851-873, strand=1  
target 5' ACGAAUCCAUGCUGUUCUUCUA 3'  
::::::::::::::::::::::::::  
query 3' UGCUUAAGGUACGACGAGAAGUU 5'  
query=miR163, target=R03G\_10048, score=1, range=851-873, strand=1  
target 5' ACGAAUCCAUGCUGUUCUUCUA 3'  
::::::::::::::::::::::::::  
query 3' UGCUUAAGGUACGACGAGAAGUU 5'  
query=miR163, target=R03G\_02231, score=1, range=851-873, strand=1  
target 5' ACGAAUCCAUGCUGUUCUUCUA 3'  
::::::::::::::::::::::::::  
query 3' UGCUUAAGGUACGACGAGAAGUU 5'  
query=miR163, target=R03G\_16127, score=1, range=851-873, strand=1  
target 5' ACGAAUCCAUGCUGUUCUUCUA 3'  
::::::::::::::::::::::::::  
query 3' UGCUUAAGGUACGACGAGAAGUU 5'  
query=miR163, target=R03G\_02827, score=1, range=851-873, strand=1  
target 5' ACGAAUCCAUGCUGUUCUUCUA 3'  
::::::::::::::::::::::::::  
query 3' UGCUUAAGGUACGACGAGAAGUU 5'  
query=miR163, target=R03G\_13711, score=1, range=836-858, strand=1  
target 5' ACGAAUCCAUGCUGUUCUUCUA 3'  
::::::::::::::::::::::::::  
query 3' UGCUUAAGGUACGACGAGAAGUU 5'  
query=miR163, target=R03G\_05910, score=1, range=851-873, strand=1  
target 5' ACGAAUCCAUGCUGUUCUUCUA 3'  
::::::::::::::::::::::::::  
query 3' UGCUUAAGGUACGACGAGAAGUU 5'  
query=miR163, target=R03G\_07115, score=1, range=812-834, strand=1  
target 5' ACGAAUCCAUGCUGUUCUUCUA 3'  
::::::::::::::::::::::::::  
query 3' UGCUUAAGGUACGACGAGAAGUU 5'  
query=miR163, target=R03G\_01198, score=1, range=785-807, strand=1

```

target 5' ACGAAUCCAUGCUGUUCUUCUA 3'
::::::::::::::::::
query 3' UGCUUAAGGUACGACGAGAAGUU 5'
query=miR163, target=R03G_09184, score=1, range=563-585, strand=1
target 5' ACGAAUCCAUGCUGUUCUUCUA 3'
::::::::::::::::::
query 3' UGCUUAAGGUACGACGAGAAGUU 5'
query=miR163, target=R03G_01723, score=1, range=272-294, strand=1
target 5' ACGAAUCCAUGCUGUUCUUCUA 3'
::::::::::::::::::
query 3' UGCUUAAGGUACGACGAGAAGUU 5'
query=miR163, target=R03G_17241, score=1, range=170-192, strand=1
target 5' ACGAAUCCAUGCUGUUCUUCUA 3'
::::::::::::::::::
query 3' UGCUUAAGGUACGACGAGAAGUU 5'
query=miR163, target=R03G_12195, score=1, range=44-66, strand=1
target 5' ACGAAUCCAUGCUGUUCUUCUA 3'
::::::::::::::::::
query 3' UGCUUAAGGUACGACGAGAAGUU 5'
query=miR163, target=R03G_07933, score=3.5, range=1332-1353, str
target 5' AC-AGAUGCAUGCUGCUCUUCUA 3'
:: . : ::::::::::::::
query 3' UGCUUAAGGUACGACGAGAAGUU 5'
query=miR163, target=R03G_12867, score=3.5, range=68-89, strand=-
target 5' AC-AAUUUCUUGCUGCUUUUUCUA 3'
:: : ::::::::::::::
query 3' UGCUUAAGGUACGACGAGAAGUU 5'
query=miR163, target=R03G_16486, score=4, range=2408-2430, strand
target 5' ACGGACUCCAGGCUGCUCUUCAG 3'
::::: :::: ::::::::::::::
query 3' UGCUUAAGGUACGACGAGAAGUU 5'
query=miR163, target=R03G_16013, score=4, range=17-39, strand=-1
target 5' ACGGAUCCGUCCUGUUCUUCUA 3'
::::::::::: ::::::::::::::
query 3' UGCUUAAGGUACGACGAGAAGUU 5'
query=miR5648-5p, target=R03G_14543, score=3, range=1452-1472,
strand=1
target 5' AGUCAAUCCUAAAUUUUUUAAA 3'
::::: : ::::::::::::::
query 3' UCAGUCCGGUUUAAAAUUU 5'
query=miR5648-5p, target=R03G_11833, score=4, range=2232-2252,
strand=-1
target 5' AUCCAAGCCCAAUUUUUGAA 3'
: :::: ::::::::::::::
query 3' UCAGUCCGGUUUAAAAUUU 5'

```

```
query=miR5648-5p, target=R03G_02881, score=4, range=1084-1105,
strand=-1
target 5' AACCAACUGCCAAAUUUUUAAA 3'
: ::: :
query 3' UCAGUU-CCGGUUUAAAAUUU 5'
query=miR1097, target=R03G_16362, score=0, range=2704-2725, stran
target 5' CUUCCAACAACAAACAAUGGCA 3'
: :
query 3' GAAGGUUGUUGUUUGUUACCGU 5'
query=miR1097, target=R03G_03008, score=4, range=1781-1802, stran
target 5' AUAUUAACAACAAACAAUGGCU 3'
: ..:
query 3' GAAGGUUGUUGUUUGUUACCGU 5'
query=miR536f, target=R03G_02551, score=0, range=241-260, strand=
target 5' UCAACACAGCUUGGACGGAA 3'
: :
query 3' AGUUGUGUCGAACCUGCCUU 5'
query=miR536f, target=R03G_01892, score=3.5, range=481-500, stran
target 5' UCGAAACAGUUUGGAUGGAA 3'
: .: :
query 3' AGUUGUGUCGAACCUGCCUU 5'
query=miR536f, target=R03G_10980, score=3.5, range=51-69, strand=
target 5' GUAG-ACAGCUUGGACGGAG 3'
. . . :
query 3' AGUUGUGUCGAACCUGCCUU 5'
query=miR536f, target=R03G_08262, score=3.5, range=978-996, stran
target 5' GUAG-ACAGCUUGGACGGAG 3'
. . . :
query 3' AGUUGUGUCGAACCUGCCUU 5'
query=miR536f, target=R03G_16396, score=3.5, range=978-996, stran
target 5' GUAG-ACAGCUUGGACGGAG 3'
. . . :
query 3' AGUUGUGUCGAACCUGCCUU 5'
query=miR536f, target=R03G_01285, score=3.5, range=1008-1026,
strand=-1
target 5' GUAG-ACAGCUUGGACGGAG 3'
. . . :
query 3' AGUUGUGUCGAACCUGCCUU 5'
query=miR536f, target=R03G_03381, score=4, range=1241-1259, stran
target 5' UCAACAC-GCUUGGAAGGAA 3'
: : : : : : :
query 3' AGUUGUGUCGAACCUGCCUU 5'
query=miR444b, target=R03G_11967, score=0, range=834-854, strand=
target 5' AACUUGGAAACAGCAACGGCA 3'
: : : : : : :
```

query 3' UUGAACCUUUGUCGUUGCCGU 5'  
query=miR444b, target=R03G\_14350, score=0, range=834-854, strand=  
target 5' AACUUGGAAACAGCAACGGCA 3'  
.....  
query 3' UUGAACCUUUGUCGUUGCCGU 5'  
query=miR444b, target=R03G\_13225, score=0, range=834-854, strand=  
target 5' AACUUGGAAACAGCAACGGCA 3'  
.....  
query 3' UUGAACCUUUGUCGUUGCCGU 5'  
query=miR444b, target=R03G\_16799, score=0, range=834-854, strand=  
target 5' AACUUGGAAACAGCAACGGCA 3'  
.....  
query 3' UUGAACCUUUGUCGUUGCCGU 5'  
query=miR444b, target=R03G\_05639, score=0, range=834-854, strand=  
target 5' AACUUGGAAACAGCAACGGCA 3'  
.....  
query 3' UUGAACCUUUGUCGUUGCCGU 5'  
query=miR444b, target=R03G\_13222, score=0.5, range=786-806, stran  
target 5' AACUUGGAAACAGCAACGGCG 3'  
.....  
query 3' UUGAACCUUUGUCGUUGCCGU 5'  
query=miR444b, target=R03G\_16818, score=0.5, range=564-584, stran  
target 5' AACUUGGAAACAGCAACGGCG 3'  
.....  
query 3' UUGAACCUUUGUCGUUGCCGU 5'  
query=miR444b, target=R03G\_14778, score=0.5, range=825-845, stran  
target 5' AACUUGGAAACAGCAACGGCG 3'  
.....  
query 3' UUGAACCUUUGUCGUUGCCGU 5'  
query=miR444b, target=R03G\_03991, score=0.5, range=834-854, stran  
target 5' AACUUGGAAACAGCAACGGCG 3'  
.....  
query 3' UUGAACCUUUGUCGUUGCCGU 5'  
query=miR444b, target=R03G\_17015, score=2, range=834-854, strand=  
target 5' AACUUGGAGACGGCAACGGCA 3'  
.....  
query 3' UUGAACCUUUGUCGUUGCCGU 5'  
query=miR444b, target=R03G\_04845, score=3.5, range=63-83, strand=  
target 5' AAUUUGGAAGCAGCAAUGGCU 3'  
.....  
query 3' UUGAACCUUUGUCGUUGCCGU 5'  
query=miR444b, target=R03G\_03379, score=4, range=171-191, strand=  
target 5' GGGUUAGAAAUAGCAACGGCA 3'  
.. :: .....  
query 3' UUGAACCUUUGUCGUUGCCGU 5'

query=miR1886.2, target=R03G\_06442, score=0, range=3476-3494,  
strand=-1  
target 5' CCAAUCACAAUAUCAUCCA 3'  
::::::::::::::::::::  
query 3' GGUUAGUGUUAUAGUAGGU 5'  
query=miR1886.2, target=R03G\_02691, score=0, range=6308-6326,  
strand=-1  
target 5' CCAAUCACAAUAUCAUCCA 3'  
::::::::::::::::::::  
query 3' GGUUAGUGUUAUAGUAGGU 5'  
query=miR1886.2, target=R03G\_09965, score=0, range=2819-2837,  
strand=-1  
target 5' CCAAUCACAAUAUCAUCCA 3'  
::::::::::::::::::::  
query 3' GGUUAGUGUUAUAGUAGGU 5'  
query=miR1886.2, target=R03G\_13920, score=0, range=2819-2837,  
strand=-1  
target 5' CCAAUCACAAUAUCAUCCA 3'  
::::::::::::::::::::  
query 3' GGUUAGUGUUAUAGUAGGU 5'  
query=miR1886.2, target=R03G\_03547, score=0, range=2819-2837,  
strand=-1  
target 5' CCAAUCACAAUAUCAUCCA 3'  
::::::::::::::::::::  
query 3' GGUUAGUGUUAUAGUAGGU 5'  
query=miR1886.2, target=R03G\_02959, score=0, range=2819-2837,  
strand=-1  
target 5' CCAAUCACAAUAUCAUCCA 3'  
::::::::::::::::::::  
query 3' GGUUAGUGUUAUAGUAGGU 5'  
query=miR1886.2, target=R03G\_13867, score=0, range=2735-2753,  
strand=-1  
target 5' CCAAUCACAAUAUCAUCCA 3'  
::::::::::::::::::::  
query 3' GGUUAGUGUUAUAGUAGGU 5'  
query=miR1886.2, target=R03G\_02221, score=0, range=2741-2759,  
strand=-1  
target 5' CCAAUCACAAUAUCAUCCA 3'  
::::::::::::::::::::  
query 3' GGUUAGUGUUAUAGUAGGU 5'  
query=miR1886.2, target=R03G\_13749, score=0, range=1382-1400,  
strand=-1  
target 5' CCAAUCACAAUAUCAUCCA 3'  
::::::::::::::::::::  
query 3' GGUUAGUGUUAUAGUAGGU 5'

query=miR1886.2, target=R03G\_01330, score=0, range=53-71, strand=  
target 5' CCAAUCACAAUAUCAUCCA 3'  
:::::::::::  
query 3' GGUUAGUGUUUAUAGUAGGU 5'  
query=miR1886.2, target=R03G\_00306, score=0, range=1268-1286,  
strand=-1  
target 5' CCAAUCACAAUAUCAUCCA 3'  
:::::::::::  
query 3' GGUUAGUGUUUAUAGUAGGU 5'  
query=miR1886.2, target=R03G\_06428, score=0, range=1913-1931,  
strand=-1  
target 5' CCAAUCACAAUAUCAUCCA 3'  
:::::::::::  
query 3' GGUUAGUGUUUAUAGUAGGU 5'  
query=miR1886.2, target=R03G\_17353, score=0, range=53-71, strand=  
target 5' CCAAUCACAAUAUCAUCCA 3'  
:::::::::::  
query 3' GGUUAGUGUUUAUAGUAGGU 5'  
query=miR1886.2, target=R03G\_05619, score=0, range=962-980, stran  
target 5' CCAAUCACAAUAUCAUCCA 3'  
:::::::::::  
query 3' GGUUAGUGUUUAUAGUAGGU 5'  
query=miR1886.2, target=R03G\_06427, score=0, range=2411-2429,  
strand=-1  
target 5' CCAAUCACAAUAUCAUCCA 3'  
:::::::::::  
query 3' GGUUAGUGUUUAUAGUAGGU 5'  
query=miR1886.2, target=R03G\_17326, score=0, range=2651-2669,  
strand=-1  
target 5' CCAAUCACAAUAUCAUCCA 3'  
:::::::::::  
query 3' GGUUAGUGUUUAUAGUAGGU 5'  
query=miR1886.2, target=R03G\_10558, score=0, range=572-590, stran  
target 5' CCAAUCACAAUAUCAUCCA 3'  
:::::::::::  
query 3' GGUUAGUGUUUAUAGUAGGU 5'  
query=miR1886.2, target=R03G\_04114, score=0, range=2819-2837,  
strand=-1  
target 5' CCAAUCACAAUAUCAUCCA 3'  
:::::::::::  
query 3' GGUUAGUGUUUAUAGUAGGU 5'  
query=miR1886.2, target=R03G\_15585, score=0, range=2774-2792,  
strand=-1  
target 5' CCAAUCACAAUAUCAUCCA 3'  
:::::::::::

query 3' GGUUAGUGUUAUAGUAGGU 5'  
query=miR1886.2, target=R03G\_15250, score=1, range=2774-2792,  
strand=-1  
target 5' CCAACCACAAUAUCAUCCA 3'  
:::: :::::::::::::::  
query 3' GGUUAGUGUUAUAGUAGGU 5'  
query=miR1886.2, target=R03G\_17371, score=1, range=2774-2792,  
strand=-1  
target 5' CCAACCACAAUAUCAUCCA 3'  
:::: :::::::::::::::  
query 3' GGUUAGUGUUAUAGUAGGU 5'  
query=miR1886.2, target=R03G\_14355, score=1, range=1025-1043,  
strand=-1  
target 5' CCAACCACAAUAUCAUCCA 3'  
:::: :::::::::::::::  
query 3' GGUUAGUGUUAUAGUAGGU 5'  
query=miR1886.2, target=R03G\_01613, score=2, range=1070-1088,  
strand=-1  
target 5' CCAAUCAAAUAUCAUCCA 3'  
::::: :::::::::::::::  
query 3' GGUUAGUGUUAUAGUAGGU 5'  
query=miR1886.2, target=R03G\_09845, score=2, range=197-215, stran  
target 5' CCAAGCACAAUAUCAUCCA 3'  
::::: :::::::::::::::  
query 3' GGUUAGUGUUAUAGUAGGU 5'  
query=miR1886.2, target=R03G\_03427, score=2.5, range=422-440,  
strand=-1  
target 5' CCAAGUACAAUAUCAUCCA 3'  
::::: .:::::::::::::  
query 3' GGUUAGUGUUAUAGUAGGU 5'  
query=miR1886.2, target=R03G\_16330, score=3, range=128-145, stran  
target 5' CCAAUCAUAAUAUC-UCCA 3'  
::::: :::::::::::::::  
query 3' GGUUAGUGUUAUAGUAGGU 5'  
query=miR1886.2, target=R03G\_12487, score=3, range=74-92, strand=  
target 5' CCAUAACAAUAUUAUCUA 3'  
::::: :::::::::::::::  
query 3' GGUUAGUGUUAUAGUAGGU 5'  
query=miR1886.2, target=R03G\_11216, score=3, range=1751-1769,  
strand=-1  
target 5' UCAGCCACGAUAUCAUCCA 3'  
.:::. :::::::::::::::  
query 3' GGUUAGUGUUAUAGUAGGU 5'  
query=miR1886.2, target=R03G\_00301, score=3, range=578-596, stran  
target 5' UCGCUACAAUAUCAUCCA 3'







query 3' GGUUAGUGUUAUAGUAGGU 5'  
query=miR1886.2, target=R03G\_10061, score=4, range=327-344, stran  
target 5' UCAAU-ACAAUACCAUCCG 3'  
. . . . . : : : : : : : : : : .

query 3' GGUUAGUGUUAUAGUAGGU 5'  
query=miR1886.2, target=R03G\_10105, score=4, range=500-518, stran  
target 5' CCAAUCUCGAUGUCAUCCA 3'  
. . . . . : : : : : : : : : : .

query 3' GGUUAGUGUUAUAGUAGGU 5'  
query=miR1886.2, target=R03G\_08529, score=4, range=215-233, stran  
target 5' UCGAUCUCAUUGUCAUCCA 3'  
. . . . . : : : : : : : : : : .

query 3' GGUUAGUGUUAUAGUAGGU 5'  
query=miR1886.2, target=R03G\_12492, score=4, range=470-488, stran  
target 5' UUAUCAUACUAUCAUCCA 3'  
. . . . . : : : : : : : : : : .

query 3' GGUUAGUGUUAUAGUAGGU 5'  
query=miR1886.2, target=R03G\_09248, score=4, range=650-668, stran  
target 5' UCAAUACAUAUUAUUCA 3'  
. . . . . : : : : : : : : : : .

query 3' GGUUAGUGUUAUAGUAGGU 5'  
query=miR1886.2, target=R03G\_12484, score=4, range=2903-2921,  
strand=-1  
target 5' AAGGUCACAAUAUCGUCCA 3'  
. . . . . : : : : : : : : : : .

query 3' GGUUAGUGUUAUAGUAGGU 5'  
query=miR1886.2, target=R03G\_10943, score=4, range=560-578, stran  
target 5' GCAAUCACAAUAUCAUCAU 3'  
. . . . . : : : : : : : : : : .

query 3' GGUUAGUGUUAUAGUAGGU 5'  
query=miR1886.2, target=R03G\_07188, score=4, range=1355-1373,  
strand=-1  
target 5' AUAAUUACAAGAUCAUCCA 3'  
. . . . . : : : : : : : : : : .

query 3' GGUUAGUGUUAUAGUAGGU 5'  
query=miR1886.2, target=R03G\_11616, score=4, range=653-671, stran  
target 5' CUGAGCAUAAUAUCAUCCU 3'  
. . . . . : : : : : : : : : : .

query 3' GGUUAGUGUUAUAGUAGGU 5'  
query=miR1886.2, target=R03G\_11160, score=4, range=1973-1992,  
strand=-1  
target 5' CUGAUUCAUAAUAUCAUCCC 3'  
. . . . . : : : : : : : : : : .

query 3' GGUU-AGUGUUAUAGUAGGU 5'  
query=miR1886.2, target=R03G\_15031, score=4, range=2153-2170,

strand=-1  
target 5' CCAA-CAUGAUUUAUCCA 3'  
:::: ::::::::::::::  
query 3' GGUUAGUGUUUAUAGUAGGU 5'  
query=miR1886.2, target=R03G\_08439, score=4, range=737-755, stran  
target 5' CCAAUCUCAUAUCACCCA 3'  
:::::: :::::::::: :::  
query 3' GGUUAGUGUUUAUAGUAGGU 5'  
query=miR1886.2, target=R03G\_16260, score=4, range=744-761, stran  
target 5' CCAGUCACAAUAU-AUUCG 3'  
:::::::::::: :::::  
query 3' GGUUAGUGUUUAUAGUAGGU 5'  
query=miR1886.2, target=R03G\_16032, score=4, range=228-245, stran  
target 5' CUGAUCACAAUA-CGUCCA 3'  
..... ::::::  
query 3' GGUUAGUGUUUAUAGUAGGU 5'  
query=miR1886.2, target=R03G\_03657, score=4, range=1505-1523,  
strand=-1  
target 5' CCCAUCACAACAUAUCCA 3'  
:: :::::::::: ::::::::::  
query 3' GGUUAGUGUUUAUAGUAGGU 5'  
query=miR1886.2, target=R03G\_03862, score=4, range=861-879, stran  
target 5' CAAUCGCAAUAUCUCCA 3'  
: :::::::::::::: :::::  
query 3' GGUUAGUGUUUAUAGUAGGU 5'  
query=miR1886.2, target=R03G\_16990, score=4, range=421-439, stran  
target 5' CAAUAAUGAUUCAUCCA 3'  
: ::: ::::::::::::::  
query 3' GGUUAGUGUUUAUAGUAGGU 5'  
query=miR1886.2, target=R03G\_09557, score=4, range=2921-2939,  
strand=-1  
target 5' UCUGUCACAAUUUCAUCCA 3'  
.:: :::::::::: ::::::::::  
query 3' GGUUAGUGUUUAUAGUAGGU 5'  
query=miR1886.2, target=R03G\_00949, score=4, range=2768-2786,  
strand=-1  
target 5' UCCAUUACAAGAUCAUCCA 3'  
.:: :::::::::: ::::::::::  
query 3' GGUUAGUGUUUAUAGUAGGU 5'  
query=miR1886.2, target=R03G\_08277, score=4, range=1802-1820,  
strand=-1  
target 5' CAGGUCACAAUAUCUCCA 3'  
: ..:::::::::::: :::::  
query 3' GGUUAGUGUUUAUAGUAGGU 5'  
query=miR1886.2, target=R03G\_14159, score=4, range=398-417, stran

```
target 5' CCAAUCCACAAUAUCAUCAU 3'
::::: ::::::::::::::
query 3' GGUUA-GUGUUAUAGUAGGU 5'
query=miR1886.2, target=R03G_04224, score=4, range=257-275, stran
target 5' UCAAACUCAAAUAUCAUCCG 3'
.:::: : ::::::::::::::.
query 3' GGUUAGUGUUAUAGUAGGU 5'
query=miR1886.2, target=R03G_05711, score=4, range=131-149, stran
target 5' UCGAUGACAAUCUCAUCCA 3'
.::::: ::::::: ::::::::::
query 3' GGUUAGUGUUAUAGUAGGU 5'
query=miR1886.2, target=R03G_01944, score=4, range=2552-2570,
strand=-1
target 5' AAAAUGAUAAUAUCAUCCA 3'
::: ::::::::::::::
query 3' GGUUAGUGUUAUAGUAGGU 5'
query=miR1886.2, target=R03G_13849, score=4, range=2552-2570,
strand=-1
target 5' AAAAUGAUAAUAUCAUCCA 3'
::: ::::::::::::::
query 3' GGUUAGUGUUAUAGUAGGU 5'
query=miR1886.2, target=R03G_17287, score=4, range=2552-2570,
strand=-1
target 5' AAAAUGAUAAUAUCAUCCA 3'
::: ::::::::::::::
query 3' GGUUAGUGUUAUAGUAGGU 5'
query=miR1886.2, target=R03G_15573, score=4, range=2552-2570,
strand=-1
target 5' AAAAUGAUAAUAUCAUCCA 3'
::: ::::::::::::::
query 3' GGUUAGUGUUAUAGUAGGU 5'
query=miR1886.2, target=R03G_10991, score=4, range=2552-2570,
strand=-1
target 5' AAAAUGAUAAUAUCAUCCA 3'
::: ::::::::::::::
query 3' GGUUAGUGUUAUAGUAGGU 5'
query=miR1886.2, target=R03G_03749, score=4, range=2552-2570,
strand=-1
target 5' AAAAUGAUAAUAUCAUCCA 3'
::: ::::::::::::::
query 3' GGUUAGUGUUAUAGUAGGU 5'
query=miR1886.2, target=R03G_06502, score=4, range=2429-2447,
strand=-1
target 5' AAAAUGAUAAUAUCAUCCA 3'
::: ::::::::::::::
```

query 3' GGUUAGUGUUAUAGUAGGU 5'  
query=miR1886.2, target=R03G\_10420, score=4, range=2552-2570,  
strand=-1  
target 5' AAAAUGAUAAUAUCAUCCA 3'  
::: :::::::::::::::  
query 3' GGUUAGUGUUAUAGUAGGU 5'  
query=miR1886.2, target=R03G\_01733, score=4, range=2354-2372,  
strand=-1  
target 5' AAAAUGAUAAUAUCAUCCA 3'  
::: :::::::::::::::  
query 3' GGUUAGUGUUAUAGUAGGU 5'  
query=miR1886.2, target=R03G\_05865, score=4, range=2204-2222,  
strand=-1  
target 5' AAAAUGAUAAUAUCAUCCA 3'  
::: :::::::::::::::  
query 3' GGUUAGUGUUAUAGUAGGU 5'  
query=miR1886.2, target=R03G\_02966, score=4, range=1823-1841,  
strand=-1  
target 5' AAAAUGAUAAUAUCAUCCA 3'  
::: :::::::::::::::  
query 3' GGUUAGUGUUAUAGUAGGU 5'  
query=miR1886.2, target=R03G\_17446, score=4, range=2552-2570,  
strand=-1  
target 5' AAAAUGAUAAUAUCAUCCA 3'  
::: :::::::::::::::  
query 3' GGUUAGUGUUAUAGUAGGU 5'  
query=miR1886.2, target=R03G\_02707, score=4, range=101-119, stran  
target 5' AAAAUGAUAAUAUCAUCCA 3'  
::: :::::::::::::::  
query 3' GGUUAGUGUUAUAGUAGGU 5'  
query=miR1886.2, target=R03G\_09351, score=4, range=458-476, stran  
target 5' GGAAUAAUAAUAUCAUCCA 3'  
::: :::::::::::::::  
query 3' GGUUAGUGUUAUAGUAGGU 5'  
query=miR1886.2, target=R03G\_02339, score=4, range=227-244, stran  
target 5' AUGAU-ACGAUAUCAUCCA 3'  
.... :::::::::::::::  
query 3' GGUUAGUGUUAUAGUAGGU 5'  
query=miR1886.2, target=R03G\_14810, score=4, range=1454-1471,  
strand=-1  
target 5' CCAA-CUCAUAUCAUCUA 3'  
.... : :::::::::::::::  
query 3' GGUUAGUGUUAUAGUAGGU 5'  
query=miR1886.2, target=R03G\_10974, score=4, range=1983-2000,  
strand=-1

target 5' CAAAUCAAAUAUC-UUCA 3'  
: :::::::::::::: ::::  
query 3' GGUUAGUGUUAUAGUAGGU 5'  
query=miR1886.2, target=R03G\_13031, score=4, range=41-58, strand=  
target 5' CCAA-CACAAUAUCAGUCA 3'  
:::: :::::::::::::: :::  
query 3' GGUUAGUGUUAUAGUAGGU 5'  
query=miR1886.2, target=R03G\_10294, score=4, range=407-424, stran  
target 5' CUAG-CACAAUAUCACCCA 3'  
:..: :::::::::::::: :::  
query 3' GGUUAGUGUUAUAGUAGGU 5'  
query=miR1886.2, target=R03G\_01664, score=4, range=497-514, stran  
target 5' CCCAU-GUAAUAUCAUCCA 3'  
:: :: ..:::::::::::::  
query 3' GGUUAGUGUUAUAGUAGGU 5'  
query=miR1886.2, target=R03G\_13901, score=4, range=2-19, strand=-  
target 5' CUAG-CACAAUAUCACCCA 3'  
:..: :::::::::::::: :::  
query 3' GGUUAGUGUUAUAGUAGGU 5'  
query=miR1886.2, target=R03G\_13930, score=4, range=24-41, strand=  
target 5' GCAAACACAAUAUCA-CCA 3'  
::: :::::::::::::: :::  
query 3' GGUUAGUGUUAUAGUAGGU 5'  
query=miR166b, target=R03G\_00261, score=0, range=129-149, strand=  
target 5' UUGGAAGGAAUGCCUGGCCGA 3'  
:::::::::::::::::::::  
query 3' AACCUUCCUUACGGACCGGCU 5'  
query=miR166b, target=R03G\_00248, score=0, range=129-149, strand=  
target 5' UUGGAAGGAAUGCCUGGCCGA 3'  
:::::::::::::::::::::  
query 3' AACCUUCCUUACGGACCGGCU 5'  
query=miR166b, target=R03G\_15127, score=1, range=141-161, strand=  
target 5' UUGGAAGGAAUGCUUGGCCGA 3'  
:::::::::::::::::::::  
query 3' AACCUUCCUUACGGACCGGCU 5'  
query=miR166b, target=R03G\_01504, score=1, range=123-143, strand=  
target 5' UUGGAAGGAAUGCUUGGCCGA 3'  
:::::::::::::::::::::  
query 3' AACCUUCCUUACGGACCGGCU 5'  
query=miR166b, target=R03G\_01650, score=1, range=123-143, strand=  
target 5' UUGGAAGGAAUGCUUGGCCGA 3'  
:::::::::::::::::::::  
query 3' AACCUUCCUUACGGACCGGCU 5'  
query=miR166b, target=R03G\_00203, score=1.5, range=117-137, stran  
target 5' UUGGAAGGAAUGCUUGGCCGG 3'

query 3' AACCUUCCUUACGGACCGGCU 5'  
query=miR166b, target=R03G\_00466, score=3, range=129-149, strand=  
target 5' UUGGAAGGAAUGCUUGACCGA 3'  
query 3' AACCUUCCUUACGGACCGGCU 5'  
query=miR166b, target=R03G\_01898, score=4, range=1111-1130, stran  
target 5' UUGGCAGAAAUGCCU-GCCGA 3'  
query 3' AACCUUCCUUACGGACCGGCU 5'  
query=miR9677-5p, target=R03G\_14134, score=1, range=177-196, stra  
target 5' CUUGGCCGUUGGAGAGGAAA 3'  
query 3' GAACCGACAACCUCUCCUUU 5'  
query=miR9677-5p, target=R03G\_10867, score=1, range=288-307, stra  
target 5' CUUGGCCGUUGGAGAGGAAA 3'  
query 3' GAACCGACAACCUCUCCUUU 5'  
query=miR9677-5p, target=R03G\_05937, score=1, range=546-565, stra  
target 5' CUUGGCCGUUGGAGAGGAAA 3'  
query 3' GAACCGACAACCUCUCCUUU 5'  
query=miR9677-5p, target=R03G\_08584, score=4, range=447-466, stra  
target 5' AUUUACUGUUGGAGAGGAGA 3'  
query 3' GAACCGACAACCUCUCCUUU 5'  
query=miR833a-5p, target=R03G\_14793, score=0, range=1679-1702,  
strand=-1  
target 5' ACAGACCGGGUACAAACAAAGCCA 3'  
query 3' UGUCUGGCCCAUGUUUGUUUCGGU 5'  
query=miR833a-5p, target=R03G\_14787, score=0, range=1679-1702,  
strand=-1  
target 5' ACAGACCGGGUACAAACAAAGCCA 3'  
query 3' UGUCUGGCCCAUGUUUGUUUCGGU 5'  
query=miR833a-5p, target=R03G\_15875, score=0, range=1679-1702,  
strand=-1  
target 5' ACAGACCGGGUACAAACAAAGCCA 3'  
query 3' UGUCUGGCCCAUGUUUGUUUCGGU 5'  
query=miR833a-5p, target=R03G\_14800, score=0, range=1679-1702,  
strand=-1  
target 5' ACAGACCGGGUACAAACAAAGCCA 3'





```

query 3' UGUCUGGCCCAUGUUUGUUUCGGU 5'
query=miR833a-5p, target=R03G_14795, score=4, range=1679-1702,
strand=-1
target 5' AGAGGCUAGGUACGAACAAAGCCA 3'
: :.:. :.:.:.:.:.:.:.:.:.:.
query 3' UGUCUGGCCCAUGUUUGUUUCGGU 5'
query=miR833a-5p, target=R03G_16815, score=4, range=1679-1702,
strand=-1
target 5' AGAGGCUAGGUACGAACAAAGCCA 3'
: :.:. .:.:.:.:.:.:.:.:.:.
query 3' UGUCUGGCCCAUGUUUGUUUCGGU 5'
query=miR2678, target=R03G_13722, score=0, range=1039-1059, stran
target 5' AAGUACAAUCCCAACAAUUCA 3'
:.:.:.:.:.:.:.:.:.:.
query 3' UUCAUGUUAGGGUUGUUAAGU 5'
query=miR2678, target=R03G_10856, score=3, range=190-210, strand=
target 5' AAGCACAAUCCCAACAAUUC 3'
:.:. :.:.:.:.:.:.:.:.:.
query 3' UUCAUGUUAGGGUUGUUAAGU 5'
query=miR2678, target=R03G_13330, score=4, range=370-390, strand=
target 5' AAGUACAAUCCCAACGAGUCC 3'
:.:.:.:.:.:.:.:.:.:.:.:.
query 3' UUCAUGUUAGGGUUGUUAAGU 5'
query=miR2678, target=R03G_02730, score=4, range=1308-1329, stran
target 5' AGGAAUAAUCCCAACAAUUCU 3'
:.:. :.:.:.:.:.:.:.:.:.
query 3' UUC-AUGUUAGGGUUGUUAAGU 5'
query=miR2678, target=R03G_11051, score=4, range=951-972, strand=
target 5' CAAUAUCAUCCCAACAAUUCA 3'
: :.:. :.:. :.:. :.:. :.:. :.:.
query 3' UUCAU-GUUAGGGUUGUUAAGU 5'
query=miR2678, target=R03G_12863, score=4, range=2097-2116, stran
target 5' AACUACAAU-CCAGCAAUUCA 3'
:.:. :.:. :.:. :.:. :.:.
query 3' UUCAUGUUAGGGUUGUUAAGU 5'
query=miR2678, target=R03G_14575, score=4, range=1722-1741, stran
target 5' CAGU-CAAUCCCAUAAUUCU 3'
:.:. :.:. :.:. :.:. :.:.
query 3' UUCAUGUUAGGGUUGUUAAGU 5'
query=miR2678, target=R03G_02743, score=4, range=845-864, strand=
target 5' AAG-ACCUUCCCAACAAUUCA 3'
:.:. :.:. :.:. :.:. :.:.
query 3' UUCAUGUUAGGGUUGUUAAGU 5'
query=miR157a-3p, target=R03G_05078, score=3.5, range=49-68, stra
target 5' AAGGAAGAAGGCUGGAGAGC 3'

```

: :. :::::::::::::::  
query 3' UACUGUCUUCCGAUCUCUCG 5'  
query=miR157a-3p, target=R03G\_12815, score=4, range=578-597, str  
target 5' AUUACAAAAGGCUAGAUAGC 3'  
: : :: :::::::::::::::  
query 3' UACUGUCUUCCGAUCUCUCG 5'  
query=miR157a-3p, target=R03G\_03369, score=4, range=829-847, str  
target 5' AAGAGA-AAGGCUAGAGAGA 3'  
: : : :::::::::::::::  
query 3' UACUGUCUUCCGAUCUCUCG 5'  
query=miR9662a-3p, target=R03G\_09376, score=2, range=499-518, str  
target 5' CCUGUCUCUGUGGAUGUUA 3'  
: : :::::::::::::::  
query 3' GAACCGAGACACCUACAAU 5'  
query=miR9662a-3p, target=R03G\_13152, score=2, range=499-518, str  
target 5' CCUGUCUCUGUGGAUGUUA 3'  
: : :::::::::::::::  
query 3' GAACCGAGACACCUACAAU 5'  
query=miR9662a-3p, target=R03G\_03988, score=2, range=499-518, str  
target 5' CCUGUCUCUGUGGAUGUUA 3'  
: : :::::::::::::::  
query 3' GAACCGAGACACCUACAAU 5'  
query=miR9662a-3p, target=R03G\_11970, score=2, range=499-518, str  
target 5' CCUGUCUCUGUGGAUGUUA 3'  
: : :::::::::::::::  
query 3' GAACCGAGACACCUACAAU 5'  
query=miR9662a-3p, target=R03G\_05630, score=2, range=499-518, str  
target 5' CCUGUCUCUGUGGAUGUUA 3'  
: : :::::::::::::::  
query 3' GAACCGAGACACCUACAAU 5'  
query=miR9662a-3p, target=R03G\_07104, score=2, range=499-518, str  
target 5' CCUGUCUCUGUGGAUGUUA 3'  
: : :::::::::::::::  
query 3' GAACCGAGACACCUACAAU 5'  
query=miR9662a-3p, target=R03G\_13859, score=2, range=124-143, str  
target 5' CCUGUCUCUGUGGAUGUUA 3'  
: : :::::::::::::::  
query 3' GAACCGAGACACCUACAAU 5'  
query=miR9662a-3p, target=R03G\_15869, score=2, range=499-518, str  
target 5' CCUGUCUCUGUGGAUGUUA 3'  
: : :::::::::::::::  
query 3' GAACCGAGACACCUACAAU 5'  
query=miR9662a-3p, target=R03G\_01203, score=2, range=499-518, str  
target 5' CCUGUCUCUGUGGAUGUUA 3'  
: : :::::::::::::::







target 5' UUGGUAGUUCUGGUACAUIUA 3'  
::::: :.....:  
query 3' AACUA-CGAGACCAUGUAGGU 5'  
query=miR6485, target=R03G\_10827, score=4, range=409-427, strand=  
target 5' AUCAU-CUCUGGUGCAUCCA 3'  
: : :.....:  
query 3' AACUACGAGACCAUGUAGGU 5'  
query=miR6485, target=R03G\_15326, score=4, range=1039-1057, stran  
target 5' ACAAU-CUCUGGUACAUCCA 3'  
:: :.....:  
query 3' AACUACGAGACCAUGUAGGU 5'  
query=miR6485, target=R03G\_11852, score=4, range=1105-1123, stran  
target 5' ACCAU-CUCUGGUACAUCCA 3'  
:: :.....:  
query 3' AACUACGAGACCAUGUAGGU 5'  
query=miR6485, target=R03G\_05346, score=4, range=151-169, strand=  
target 5' UCGUUGC-CUGGUACAUCCA 3'  
: : : : :.....:  
query 3' AACUACGAGACCAUGUAGGU 5'  
query=miR6485, target=R03G\_02318, score=4, range=344-363, strand=  
target 5' UCGAUGCUCUGGUAAAUCUA 3'  
: : :.....: :.....:  
query 3' AACUACGAGACCAUGUAGGU 5'  
query=miR6485, target=R03G\_13551, score=4, range=768-786, strand=  
target 5' UUGAU-CUCCGGUAUAUCCA 3'  
: : : : :.....:  
query 3' AACUACGAGACCAUGUAGGU 5'  
query=miR6485, target=R03G\_11824, score=4, range=657-677, strand=  
target 5' UUGAAGACUUUGGUACAUCU 3'  
: : : : :.....:  
query 3' AACUAC-GAGACCAUGUAGGU 5'  
query=miR6485, target=R03G\_03947, score=4, range=4286-4305, stran  
target 5' UUCAUCCUCUGGUAAAUCCA 3'  
: : : : :.....: :.....:  
query 3' AACUACGAGACCAUGUAGGU 5'  
query=miR6485, target=R03G\_04730, score=4, range=254-272, strand=  
target 5' AUGAU-CUCUGGUAGAUCU 3'  
: : : : :.....: :.....:  
query 3' AACUACGAGACCAUGUAGGU 5'  
query=miR6485, target=R03G\_08203, score=4, range=893-911, strand=  
target 5' ACUAU-CUCUGGUACAUCCA 3'  
: : :.....:  
query 3' AACUACGAGACCAUGUAGGU 5'  
query=miR6485, target=R03G\_02325, score=4, range=1385-1403, stran  
target 5' UUCAU-CUCAGGUACAUCCA 3'

:: :: ::: :  
query 3' AACUACGAGACCAUGUAGGU 5'  
query=miR6485, target=R03G\_14338, score=4, range=1385-1403, stran  
target 5' UUCAU-CUCAGGUACAUCCA 3'  
:: :: ::: :  
query 3' AACUACGAGACCAUGUAGGU 5'  
query=miR6269, target=R03G\_13221, score=0, range=860-881, strand=  
target 5' CCAUGGCUAAUCACUUGCAGCA 3'  
:  
query 3' GGUACCGAUUAGUGAACGUCGU 5'  
query=miR6269, target=R03G\_04123, score=2, range=860-881, strand=  
target 5' CCAUGGCUAACCACUUGCAGCA 3'  
:  
query 3' GGUACCGAUUAGUGAACGUCGU 5'  
query=miR6269, target=R03G\_13224, score=4, range=860-881, strand=  
target 5' CCAUGGCUAACCACUUGCAACA 3'  
:  
query 3' GGUACCGAUUAGUGAACGUCGU 5'  
query=miR6269, target=R03G\_04120, score=4, range=860-881, strand=  
target 5' CCAUGGCUAACCACUUGCAACA 3'  
:  
query 3' GGUACCGAUUAGUGAACGUCGU 5'  
query=miR6269, target=R03G\_17093, score=4, range=620-641, strand=  
target 5' CCAUGGCUAACCACUUGCAACA 3'  
:  
query 3' GGUACCGAUUAGUGAACGUCGU 5'  
query=miR6269, target=R03G\_16246, score=4, range=1704-1726, stran  
target 5' CCAUGGUCAAUCACUUGCACCA 3'  
:  
query 3' GGUACC-GAUUAGUGAACGUCGU 5'  
query=miR6156, target=R03G\_05342, score=0, range=559-579, strand=  
target 5' ACGAACAAAGAACUUCUUCAA 3'  
:  
query 3' UGCUUGUUUCUUGAAGAAGUU 5'  
query=miR6156, target=R03G\_14552, score=0, range=559-579, strand=  
target 5' ACGAACAAAGAACUUCUUCAA 3'  
:  
query 3' UGCUUGUUUCUUGAAGAAGUU 5'  
query=miR6156, target=R03G\_16368, score=0, range=559-579, strand=  
target 5' ACGAACAAAGAACUUCUUCAA 3'  
:  
query 3' UGCUUGUUUCUUGAAGAAGUU 5'  
query=miR6156, target=R03G\_13451, score=0, range=394-414, strand=  
target 5' ACGAACAAAGAACUUCUUCAA 3'  
:



query 3' UGCUUGUUUCUUGAAGAAGUU 5'  
query=miR6156, target=R03G\_13708, score=0, range=394-414, strand=  
target 5' ACGAACAAAGAACUUCUUCAA 3'  
.....  
query 3' UGCUUGUUUCUUGAAGAAGUU 5'  
query=miR6156, target=R03G\_11542, score=0, range=394-414, strand=  
target 5' ACGAACAAAGAACUUCUUCAA 3'  
.....  
query 3' UGCUUGUUUCUUGAAGAAGUU 5'  
query=miR6156, target=R03G\_12646, score=0, range=394-414, strand=  
target 5' ACGAACAAAGAACUUCUUCAA 3'  
.....  
query 3' UGCUUGUUUCUUGAAGAAGUU 5'  
query=miR6156, target=R03G\_15886, score=0, range=394-414, strand=  
target 5' ACGAACAAAGAACUUCUUCAA 3'  
.....  
query 3' UGCUUGUUUCUUGAAGAAGUU 5'  
query=miR6156, target=R03G\_05908, score=0, range=394-414, strand=  
target 5' ACGAACAAAGAACUUCUUCAA 3'  
.....  
query 3' UGCUUGUUUCUUGAAGAAGUU 5'  
query=miR6156, target=R03G\_01193, score=0, range=259-279, strand=  
target 5' ACGAACAAAGAACUUCUUCAA 3'  
.....  
query 3' UGCUUGUUUCUUGAAGAAGUU 5'  
query=miR6156, target=R03G\_12077, score=0, range=631-651, strand=  
target 5' ACGAACAAAGAACUUCUUCAA 3'  
.....  
query 3' UGCUUGUUUCUUGAAGAAGUU 5'  
query=miR6156, target=R03G\_01716, score=0, range=394-414, strand=  
target 5' ACGAACAAAGAACUUCUUCAA 3'  
.....  
query 3' UGCUUGUUUCUUGAAGAAGUU 5'  
query=miR6156, target=R03G\_17393, score=0, range=520-540, strand=  
target 5' ACGAACAAAGAACUUCUUCAA 3'  
.....  
query 3' UGCUUGUUUCUUGAAGAAGUU 5'  
query=miR6156, target=R03G\_16918, score=0, range=394-414, strand=  
target 5' ACGAACAAAGAACUUCUUCAA 3'  
.....  
query 3' UGCUUGUUUCUUGAAGAAGUU 5'  
query=miR6156, target=R03G\_07693, score=0, range=559-579, strand=  
target 5' ACGAACAAAGAACUUCUUCAA 3'  
.....  
query 3' UGCUUGUUUCUUGAAGAAGUU 5'

query=miR6156, target=R03G\_07978, score=0, range=559-579, strand=  
target 5' ACGAACAAAGAACUUCUCAA 3'  
::::::::::::::::::::  
query 3' UGCUUGUUUCUUGAAGAAGUU 5'  
query=miR6156, target=R03G\_04658, score=0, range=394-414, strand=  
target 5' ACGAACAAAGAACUUCUCAA 3'  
::::::::::::::::::::  
query 3' UGCUUGUUUCUUGAAGAAGUU 5'  
query=miR6156, target=R03G\_07113, score=0, range=406-426, strand=  
target 5' ACGAACAAAGAACUUCUCAA 3'  
::::::::::::::::::::  
query 3' UGCUUGUUUCUUGAAGAAGUU 5'  
query=miR6156, target=R03G\_17240, score=0, range=406-426, strand=  
target 5' ACGAACAAAGAACUUCUCAA 3'  
::::::::::::::::::::  
query 3' UGCUUGUUUCUUGAAGAAGUU 5'  
query=miR6156, target=R03G\_17450, score=0, range=394-414, strand=  
target 5' ACGAACAAAGAACUUCUCAA 3'  
::::::::::::::::::::  
query 3' UGCUUGUUUCUUGAAGAAGUU 5'  
query=miR6156, target=R03G\_13285, score=0, range=394-414, strand=  
target 5' ACGAACAAAGAACUUCUCAA 3'  
::::::::::::::::::::  
query 3' UGCUUGUUUCUUGAAGAAGUU 5'  
query=miR6156, target=R03G\_01323, score=0, range=394-414, strand=  
target 5' ACGAACAAAGAACUUCUCAA 3'  
::::::::::::::::::::  
query 3' UGCUUGUUUCUUGAAGAAGUU 5'  
query=miR6156, target=R03G\_17212, score=0, range=394-414, strand=  
target 5' ACGAACAAAGAACUUCUCAA 3'  
::::::::::::::::::::  
query 3' UGCUUGUUUCUUGAAGAAGUU 5'  
query=miR6156, target=R03G\_16740, score=0, range=394-414, strand=  
target 5' ACGAACAAAGAACUUCUCAA 3'  
::::::::::::::::::::  
query 3' UGCUUGUUUCUUGAAGAAGUU 5'  
query=miR6156, target=R03G\_10049, score=0, range=394-414, strand=  
target 5' ACGAACAAAGAACUUCUCAA 3'  
::::::::::::::::::::  
query 3' UGCUUGUUUCUUGAAGAAGUU 5'  
query=miR6156, target=R03G\_12012, score=0, range=559-579, strand=  
target 5' ACGAACAAAGAACUUCUCAA 3'  
::::::::::::::::::::  
query 3' UGCUUGUUUCUUGAAGAAGUU 5'  
query=miR6156, target=R03G\_09492, score=0, range=559-579, strand=



query 3' UGCUUGUUUCUUGAAGAAGUU 5'  
query=miR6156, target=R03G\_01724, score=0.5, range=406-426, stran  
target 5' ACGGACAAAGAACUUCUUCAA 3'

query 3' UGCUUGUUUCUUGAAGAAGUU 5'  
query=miR6156, target=R03G\_01199, score=0.5, range=406-426, stran  
target 5' ACGGACAAAGAACUUCUUCAA 3'

query 3' UGCUUGUUUCUUGAAGAAGUU 5'  
query=miR6156, target=R03G\_13712, score=0.5, range=406-426, stran  
target 5' ACGGACAAAGAACUUCUUCAA 3'

query 3' UGCUUGUUUCUUGAAGAAGUU 5'  
query=miR6156, target=R03G\_17434, score=0.5, range=406-426, stran  
target 5' ACGGACAAAGAACUUCUUCAA 3'

query 3' UGCUUGUUUCUUGAAGAAGUU 5'  
query=miR6156, target=R03G\_02232, score=0.5, range=361-381, stran  
target 5' ACGGACAAAGAACUUCUUCAA 3'

query 3' UGCUUGUUUCUUGAAGAAGUU 5'  
query=miR6156, target=R03G\_10518, score=0.5, range=559-579, stran  
target 5' ACGAACGAAGAACUUCUUCAA 3'

query 3' UGCUUGUUUCUUGAAGAAGUU 5'  
query=miR6156, target=R03G\_05426, score=0.5, range=406-426, stran  
target 5' ACGGACAAAGAACUUCUUCAA 3'

query 3' UGCUUGUUUCUUGAAGAAGUU 5'  
query=miR6156, target=R03G\_16899, score=1, range=559-579, strand=  
target 5' ACGAACAAAGAACUUCUUCAA 3'

query 3' UGCUUGUUUCUUGAAGAAGUU 5'  
query=miR6156, target=R03G\_04683, score=3, range=478-498, strand=  
target 5' ACGAACAAAAACUUCUUCUAA 3'

query 3' UGCUUGUUUCUUGAAGAAGUU 5'  
query=miR6156, target=R03G\_13273, score=3.5, range=478-498, stran  
target 5' ACGAGCAAAAAACUUCUUCUAA 3'

query 3' UGCUUGUUUCUUGAAGAAGUU 5'  
query=miR6156, target=R03G\_13145, score=3.5, range=478-498, stran  
target 5' ACGAGCAAAAAACUUCUUCUAA 3'

query 3' UGCUUGUUUCUUGAAGAAGUU 5'  
query=miR6156, target=R03G\_16749, score=3.5, range=478-498, stran  
target 5' ACGAGCAAAAACUUCUUUAA 3'  
.....  
query 3' UGCUUGUUUCUUGAAGAAGUU 5'  
query=miR6156, target=R03G\_10217, score=3.5, range=478-498, stran  
target 5' ACGAGCAAAAACUUCUUUAA 3'  
.....  
query 3' UGCUUGUUUCUUGAAGAAGUU 5'  
query=miR6156, target=R03G\_11969, score=3.5, range=478-498, stran  
target 5' ACGAGCAAAAACUUCUUUAA 3'  
.....  
query 3' UGCUUGUUUCUUGAAGAAGUU 5'  
query=miR6156, target=R03G\_07307, score=3.5, range=478-498, stran  
target 5' ACGAGCAAAAACUUCUUUAA 3'  
.....  
query 3' UGCUUGUUUCUUGAAGAAGUU 5'  
query=miR6156, target=R03G\_11409, score=3.5, range=478-498, stran  
target 5' ACGAGCAAAAACUUCUUUAA 3'  
.....  
query 3' UGCUUGUUUCUUGAAGAAGUU 5'  
query=miR6156, target=R03G\_09930, score=3.5, range=478-498, stran  
target 5' ACGAGCAAAAACUUCUUUAA 3'  
.....  
query 3' UGCUUGUUUCUUGAAGAAGUU 5'  
query=miR6156, target=R03G\_06731, score=3.5, range=478-498, stran  
target 5' ACGAGCAAAAACUUCUUUAA 3'  
.....  
query 3' UGCUUGUUUCUUGAAGAAGUU 5'  
query=miR6156, target=R03G\_04212, score=3.5, range=478-498, stran  
target 5' ACGAGCAAAAACUUCUUUAA 3'  
.....  
query 3' UGCUUGUUUCUUGAAGAAGUU 5'  
query=miR6156, target=R03G\_07698, score=3.5, range=478-498, stran  
target 5' ACGAGCAAAAACUUCUUUAA 3'  
.....  
query 3' UGCUUGUUUCUUGAAGAAGUU 5'  
query=miR6156, target=R03G\_09601, score=3.5, range=478-498, stran  
target 5' ACGAGCAAAAACUUCUUUAA 3'  
.....  
query 3' UGCUUGUUUCUUGAAGAAGUU 5'  
query=miR6156, target=R03G\_11538, score=3.5, range=478-498, stran  
target 5' ACGAGCAAAAACUUCUUUAA 3'  
.....  
query 3' UGCUUGUUUCUUGAAGAAGUU 5'



target 5' AUGAACAGAGCGCUUCUCAA 3'  
:.....: .....

query 3' UGCUUGUUUCUUGAAGAAGUU 5'  
query=miR6156, target=R03G\_10498, score=4, range=1223-1243, stran  
target 5' ACUUGCGAAGAACUUCUUUAA 3'  
:: .....:

query 3' UGCUUGUUUCUUGAAGAAGUU 5'  
query=miR6156, target=R03G\_08677, score=4, range=668-687, strand=  
target 5' ACGAGCCAAGAA-UUCUUCAG 3'  
:.....: .....

query 3' UGCUUGUUUCUUGAAGAAGUU 5'  
query=miR6156, target=R03G\_12153, score=4, range=1571-1590, stran  
target 5' ACAAUCAAAG-ACUUCUCAA 3'  
:: : .....:

query 3' UGCUUGUUUCUUGAAGAAGUU 5'  
query=miR6156, target=R03G\_10466, score=4, range=214-233, strand=  
target 5' GCUUGC-AAGAACUUCUCAA 3'  
.:.: .....:

query 3' UGCUUGUUUCUUGAAGAAGUU 5'  
query=miR6156, target=R03G\_08561, score=4, range=284-303, strand=  
target 5' ACGAAC-CAGAAUUCUUUAA 3'  
:.....: .....

query 3' UGCUUGUUUCUUGAAGAAGUU 5'  
query=miR6156, target=R03G\_16296, score=4, range=512-531, strand=  
target 5' AGAAACAAAGAA-UUCUCAA 3'  
: .....:

query 3' UGCUUGUUUCUUGAAGAAGUU 5'  
query=miR403-3p, target=R03G\_10567, score=4, range=5795-5813, str  
target 5' CACUUU-UGCGUGAAUCUGA 3'  
: ::: .....:

query 3' CUCAAACACGCACUUAGAUU 5'  
query=miR5244, target=R03G\_10142, score=0, range=338-359, strand=  
target 5' ACCAACAAACUACUUCAAGAGAA 3'  
:.....: .....

query 3' UGGUUGUUGAUGAAGUUCUCUU 5'  
query=miR5244, target=R03G\_03107, score=0, range=338-359, strand=  
target 5' ACCAACAAACUACUUCAAGAGAA 3'  
:.....: .....

query 3' UGGUUGUUGAUGAAGUUCUCUU 5'  
query=miR5244, target=R03G\_01078, score=4, range=207-228, strand=  
target 5' ACAACACCCUGUUUCAAGAGAA 3'  
:: ....: .....

query 3' UGGUUGUUGAUGAAGUUCUCUU 5'  
query=miR2611, target=R03G\_15874, score=0, range=154-175, strand=  
target 5' UUCUACCACAACACUGAAAAUA 3'





query 3' GCAAACUGGUAAGAUCUAU 5'  
query=miR5568e-3p, target=R03G\_17247, score=0, range=1469-1489,  
strand=-1  
target 5' CGUUUUGACCAUUUCUAGAUA 3'

query 3' GCAAACUGGUAAGAUCUAU 5'  
query=miR5568e-3p, target=R03G\_07127, score=0, range=1469-1489,  
strand=-1  
target 5' CGUUUUGACCAUUUCUAGAUA 3'

query 3' GCAAACUGGUAAGAUCUAU 5'  
query=miR5568e-3p, target=R03G\_10547, score=0, range=1469-1489,  
strand=-1  
target 5' CGUUUUGACCAUUUCUAGAUA 3'

query 3' GCAAACUGGUAAGAUCUAU 5'  
query=miR5568e-3p, target=R03G\_12068, score=0, range=1328-1348,  
strand=-1  
target 5' CGUUUUGACCAUUUCUAGAUA 3'

query 3' GCAAACUGGUAAGAUCUAU 5'  
query=miR5568e-3p, target=R03G\_17219, score=0, range=1328-1348,  
strand=-1  
target 5' CGUUUUGACCAUUUCUAGAUA 3'

query 3' GCAAACUGGUAAGAUCUAU 5'  
query=miR5568e-3p, target=R03G\_15165, score=2, range=1469-1489,  
strand=-1  
target 5' CGUUUUGACCAUUGCUAGAUA 3'

query 3' GCAAACUGGUAAGAUCUAU 5'  
query=miR6464, target=R03G\_17255, score=0, range=605-625, strand=  
target 5' AUCAACAUCAACAAGCAAACA 3'

query 3' UAGUUGUAGUUGUUCGUUUGU 5'  
query=miR6464, target=R03G\_10532, score=1, range=605-625, strand=  
target 5' AUCAACAUCAACAAGCAAUA 3'

query 3' UAGUUGUAGUUGUUCGUUUGU 5'  
query=miR6464, target=R03G\_10747, score=1, range=719-739, strand=  
target 5' AUCAACAUCAACAAGCAAUA 3'

query 3' UAGUUGUAGUUGUUCGUUUGU 5'  
query=miR6464, target=R03G\_16366, score=1.5, range=605-625, stran

```

target 5' AUCAACAUCAACAAGCAAAUG 3'
:.....
query 3' UAGUUGUAGUUGUUCGUUUGU 5'
query=miR6464, target=R03G_11979, score=1.5, range=589-609, stran
target 5' AUCAACAUCAACAAGCAAAUG 3'
:.....
query 3' UAGUUGUAGUUGUUCGUUUGU 5'
query=miR6464, target=R03G_13448, score=1.5, range=605-625, stran
target 5' AUCAACAUCAACAAGCAAAUG 3'
:.....
query 3' UAGUUGUAGUUGUUCGUUUGU 5'
query=miR6464, target=R03G_10543, score=1.5, range=77-97, strand=
target 5' AUCAACAUCAACAAGCAAAUG 3'
:.....
query 3' UAGUUGUAGUUGUUCGUUUGU 5'
query=miR6464, target=R03G_07862, score=2, range=719-739, strand=
target 5' AUCAACAUCAGCAAGCAAAUA 3'
:.....:
query 3' UAGUUGUAGUUGUUCGUUUGU 5'
query=miR6464, target=R03G_10744, score=2, range=605-625, strand=
target 5' AUCAACAUCAGCAAGCAAAUA 3'
:.....:
query 3' UAGUUGUAGUUGUUCGUUUGU 5'
query=miR6464, target=R03G_09173, score=2, range=719-739, strand=
target 5' AUCAACAUCAGCAAGCAAAUA 3'
:.....:
query 3' UAGUUGUAGUUGUUCGUUUGU 5'
query=miR6464, target=R03G_17218, score=2, range=605-625, strand=
target 5' AUCAACAUCAACAAGCGAAUA 3'
:.....:
query 3' UAGUUGUAGUUGUUCGUUUGU 5'
query=miR6464, target=R03G_17253, score=2, range=605-625, strand=
target 5' AUCAGCAUCAACAAGCAAAUG 3'
:.....
query 3' UAGUUGUAGUUGUUCGUUUGU 5'
query=miR6464, target=R03G_10539, score=2, range=719-739, strand=
target 5' AUCAACACCAACAAGCAAAUA 3'
:.....:
query 3' UAGUUGUAGUUGUUCGUUUGU 5'
query=miR6464, target=R03G_03861, score=2.5, range=72-92, strand=
target 5' AUCAUCAUCAACAAGUAAACG 3'
:....:
query 3' UAGUUGUAGUUGUUCGUUUGU 5'
query=miR6464, target=R03G_01193, score=2.5, range=1655-1675, str
target 5' AACAUUAUCAACAAGCAAACA 3'

```



query 3' UAGUU-GUAGUUGUUCGUUUGU 5'  
query=miR6464, target=R03G\_00530, score=3.5, range=97-118, strand  
target 5' AUUAAUCAGCAACAAGCAGACA 3'  
.....  
query 3' UAGUU-GUAGUUGUUCGUUUGU 5'  
query=miR6464, target=R03G\_07259, score=3.5, range=2026-2045, str  
target 5' AUC-ACGUCCACAAGCAAACA 3'  
... ..  
query 3' UAGUUGUAGUUGUUCGUUUGU 5'  
query=miR6464, target=R03G\_09333, score=3.5, range=331-350, stran  
target 5' AUCAUUAUCAACAA-CAAACA 3'  
.....  
query 3' UAGUUGUAGUUGUUCGUUUGU 5'  
query=miR6464, target=R03G\_00639, score=3.5, range=562-581, stran  
target 5' AUCAAU-UUGACAAGCAAACA 3'  
.....  
query 3' UAGUUGUAGUUGUUCGUUUGU 5'  
query=miR6464, target=R03G\_05074, score=4, range=1688-1708, stran  
target 5' AUCAACAACAGCAAGUAAACU 3'  
.....  
query 3' UAGUUGUAGUUGUUCGUUUGU 5'  
query=miR6464, target=R03G\_13401, score=4, range=686-706, strand=  
target 5' AUCAACGCCAACAAGCACACG 3'  
.....  
query 3' UAGUUGUAGUUGUUCGUUUGU 5'  
query=miR6464, target=R03G\_14450, score=4, range=42-63, strand=1  
target 5' AUCUUAUCAAAUGAGCAAACA 3'  
... ..  
query 3' UAG-UUGUAGUUGUUCGUUUGU 5'  
query=miR6464, target=R03G\_17083, score=4, range=153-173, strand=  
target 5' AGCAACAUCAACAAACAACC 3'  
: ..  
query 3' UAGUUGUAGUUGUUCGUUUGU 5'  
query=miR6464, target=R03G\_07291, score=4, range=1250-1270, stran  
target 5' CUCAACAACAACAAGAAAACA 3'  
.....  
query 3' UAGUUGUAGUUGUUCGUUUGU 5'  
query=miR6464, target=R03G\_04620, score=4, range=854-873, strand=  
target 5' AUCAUCAUCAACAA-CAGACA 3'  
.....  
query 3' UAGUUGUAGUUGUUCGUUUGU 5'  
query=miR6464, target=R03G\_04140, score=4, range=395-414, strand=  
target 5' AUCAACAACAACAAG-AGACA 3'  
.....  
query 3' UAGUUGUAGUUGUUCGUUUGU 5'

query=miR6464, target=R03G\_15991, score=4, range=959-980, strand=  
target 5' AACAAACAACAACAAGCAGAACA 3'  
: ::::: ::::::::::: ::::  
query 3' UAGUUGUAGUUGUUCGU-UUGU 5'  
query=miR6464, target=R03G\_17097, score=4, range=676-697, strand=  
target 5' AUCAAUCAGCAACAAGCACACA 3'  
::::: :: ::::::::::: :::  
query 3' UAGUU-GUAGUUGUUCGUUUGU 5'  
query=miR6464, target=R03G\_00154, score=4, range=47-66, strand=1  
target 5' AUAUCAUCAACAAG-AAACA 3'  
:: : ::::::::::: :::::  
query 3' UAGUUGUAGUUGUUCGUUUGU 5'  
query=miR6464, target=R03G\_01487, score=4, range=18-37, strand=1  
target 5' AACAAACAACAACA-CAAACA 3'  
: ::::: ::::::::::: :::::  
query 3' UAGUUGUAGUUGUUCGUUUGU 5'  
query=miR6464, target=R03G\_00781, score=4, range=2404-2423, stran  
target 5' GACAAUAUCAAC-AGCAAACA 3'  
. ::::::::::: :::::::::::  
query 3' UAGUUGUAGUUGUUCGUUUGU 5'  
query=miR6464, target=R03G\_01599, score=4, range=275-294, strand=  
target 5' AGCAACAACAACAA-CAAACA 3'  
: ::::: ::::::::::: :::::  
query 3' UAGUUGUAGUUGUUCGUUUGU 5'  
query=miR6464, target=R03G\_12687, score=4, range=232-252, strand=  
target 5' AUUGACAACAACAAGAAAACA 3'  
::: ::::: ::::::::::: :::::  
query 3' UAGUUGUAGUUGUUCGUUUGU 5'  
query=miR6464, target=R03G\_02376, score=4, range=3656-3675, stran  
target 5' AUAAACACCAACAAGC-AAACA 3'  
:: ::::: ::::::::::: :::::  
query 3' UAGUUGUAGUUGUUCGUUUGU 5'  
query=miR7541, target=R03G\_08829, score=0, range=170-192, strand=  
target 5' GUGCCAGCAAAAGAGACAUUGCA 3'  
:::::::::::::::::::::::::::::  
query 3' CACGGUCGUUUUCUCUGUAACGU 5'  
query=miR5512a, target=R03G\_13852, score=1, range=462-484, strand  
target 5' AUUUCAGCAUGACAAUGAUCCUA 3'  
::::: ::::::::::: :::::::::::  
query 3' UAAAAUCGUACUGUUACUAGGAU 5'  
query=miR5512a, target=R03G\_15271, score=2, range=711-733, strand  
target 5' AUUUCAGCACGACAAUGAUCCUA 3'  
::::: ::::: ::::::::::: :::::::::::  
query 3' UAAAAUCGUACUGUUACUAGGAU 5'  
query=miR5512a, target=R03G\_10771, score=2, range=462-484, strand

target 5' AUUUCAACAUGACAAUGAUCCUA 3'  
:::: : ::::::::::::::::::::  
query 3' UAAAAUCGUACUGUUACUAGGAU 5'  
query=miR5512a, target=R03G\_16725, score=2, range=453-475, strand  
target 5' AUUUCAGCACGACAAUGAUCCUA 3'  
:::: :::: : ::::::::::::::::::::  
query 3' UAAAAUCGUACUGUUACUAGGAU 5'  
query=miR5512a, target=R03G\_07739, score=3, range=462-484, strand  
target 5' AUUUCAGCAUGAGAAUGAUCCUA 3'  
:::: : :::: : ::::::::::::::::::::  
query 3' UAAAAUCGUACUGUUACUAGGAU 5'  
query=miR5512a, target=R03G\_03797, score=3, range=209-232, strand  
target 5' AUUUUCAGCACGACAGUGAUCCUA 3'  
::::: :::: : ::::: ::::::::::::::::::::  
query 3' UAAAA-UCGUACUGUUACUAGGAU 5'  
query=miR5512a, target=R03G\_00745, score=3, range=432-454, strand  
target 5' AUUUCAACACGACAAUGAUCCUA 3'  
:::: : : : ::::::::::::::::::::  
query 3' UAAAAUCGUACUGUUACUAGGAU 5'  
query=miR5512a, target=R03G\_12082, score=4, range=599-622, strand  
target 5' AUUUUCAACACGACAGUGAUCCUA 3'  
::::: : : : ::::: ::::::::::::::::::::  
query 3' UAAAA-UCGUACUGUUACUAGGAU 5'  
query=miR5512a, target=R03G\_10226, score=4, range=521-544, strand  
target 5' AUUUUCAACACGACAGUGAUCCUA 3'  
::::: : : : ::::: ::::::::::::::::::::  
query 3' UAAAA-UCGUACUGUUACUAGGAU 5'  
query=miR5512a, target=R03G\_14772, score=4, range=599-622, strand  
target 5' AUUUUCAACACGACAGUGAUCCUA 3'  
::::: : : : ::::: ::::::::::::::::::::  
query 3' UAAAA-UCGUACUGUUACUAGGAU 5'  
query=miR5512a, target=R03G\_12670, score=4, range=521-544, strand  
target 5' AUUUUCAACACGACAGUGAUCCUA 3'  
::::: : : : ::::: ::::::::::::::::::::  
query 3' UAAAA-UCGUACUGUUACUAGGAU 5'  
query=miR5512a, target=R03G\_17436, score=4, range=521-544, strand  
target 5' AUUUUCAACACGACAGUGAUCCUA 3'  
::::: : : : ::::: ::::::::::::::::::::  
query 3' UAAAA-UCGUACUGUUACUAGGAU 5'  
query=miR5512a, target=R03G\_09167, score=4, range=521-544, strand  
target 5' AUUUUCAACACGACAGUGAUCCUA 3'  
::::: : : : ::::: ::::::::::::::::::::  
query 3' UAAAA-UCGUACUGUUACUAGGAU 5'  
query=miR5512a, target=R03G\_07689, score=4, range=521-544, strand  
target 5' AUUUUCAACACGACAGUGAUCCUA 3'

::::: : :: :::::::::::::::  
query 3' UAAAA-UCGUACUGUUACUAGGAU 5'  
query=miR5512a, target=R03G\_00247, score=4, range=521-544, strand  
target 5' AUUUUCAACACGACAGUGAUCCUA 3'  
::::: : :: :::::::::::::::  
query 3' UAAAA-UCGUACUGUUACUAGGAU 5'  
query=miR5512a, target=R03G\_04654, score=4, range=521-544, strand  
target 5' AUUUUCAACACGACAGUGAUCCUA 3'  
::::: : :: :::::::::::::::  
query 3' UAAAA-UCGUACUGUUACUAGGAU 5'  
query=miR5512a, target=R03G\_07302, score=4, range=521-544, strand  
target 5' AUUUUCAACACGACAGUGAUCCUA 3'  
::::: : :: :::::::::::::::  
query 3' UAAAA-UCGUACUGUUACUAGGAU 5'  
query=miR5512a, target=R03G\_04200, score=4, range=521-544, strand  
target 5' AUUUUCAACACGACAGUGAUCCUA 3'  
::::: : :: :::::::::::::::  
query 3' UAAAA-UCGUACUGUUACUAGGAU 5'  
query=miR5512a, target=R03G\_11405, score=4, range=521-544, strand  
target 5' AUUUUCAACACGACAGUGAUCCUA 3'  
::::: : :: :::::::::::::::  
query 3' UAAAA-UCGUACUGUUACUAGGAU 5'  
query=miR5512a, target=R03G\_09944, score=4, range=521-544, strand  
target 5' AUUUUCAACACGACAGUGAUCCUA 3'  
::::: : :: :::::::::::::::  
query 3' UAAAA-UCGUACUGUUACUAGGAU 5'  
query=miR5512a, target=R03G\_15672, score=4, range=521-544, strand  
target 5' AUUUUCAACACGACAGUGAUCCUA 3'  
::::: : :: :::::::::::::::  
query 3' UAAAA-UCGUACUGUUACUAGGAU 5'  
query=miR5512a, target=R03G\_06721, score=4, range=521-544, strand  
target 5' AUUUUCAACACGACAGUGAUCCUA 3'  
::::: : :: :::::::::::::::  
query 3' UAAAA-UCGUACUGUUACUAGGAU 5'  
query=miR5512a, target=R03G\_03785, score=4, range=326-349, strand  
target 5' AUUUUCAACACGACAGUGAUCCUA 3'  
::::: : :: :::::::::::::::  
query 3' UAAAA-UCGUACUGUUACUAGGAU 5'  
query=miR5512a, target=R03G\_14620, score=4, range=149-172, strand  
target 5' AUUUUCAACACGACAGUGAUCCUA 3'  
::::: : :: :::::::::::::::  
query 3' UAAAA-UCGUACUGUUACUAGGAU 5'  
query=miR5512a, target=R03G\_17349, score=4, range=13-35, strand=-  
target 5' AUUUUAGCAUGACAAUGACCCAA 3'  
::::: : :: :::::::::::::::

query 3' UAAAAUCGUACUGUUACUAGGAU 5'  
query=miR5512a, target=R03G\_16894, score=4, range=13-35, strand=-  
target 5' AUUUUAGCAUGACAAUGACCCAA 3'  
: : :  
query 3' UAAAAUCGUACUGUUACUAGGAU 5'  
query=miR5144-3p, target=R03G\_10780, score=0, range=350-373, stra  
target 5' CUUUCUUGUGCUGUGCAGUGAGUA 3'  
:  
query 3' GAAAGAACACGACACGUCACUCAU 5'  
query=miR5144-3p, target=R03G\_10773, score=0, range=350-373, stra  
target 5' CUUUCUUGUGCUGUGCAGUGAGUA 3'  
:  
query 3' GAAAGAACACGACACGUCACUCAU 5'  
query=miR5144-3p, target=R03G\_04210, score=0, range=350-373, stra  
target 5' CUUUCUUGUGCUGUGCAGUGAGUA 3'  
:  
query 3' GAAAGAACACGACACGUCACUCAU 5'  
query=miR5144-3p, target=R03G\_09542, score=0, range=350-373, stra  
target 5' CUUUCUUGUGCUGUGCAGUGAGUA 3'  
:  
query 3' GAAAGAACACGACACGUCACUCAU 5'  
query=miR5144-3p, target=R03G\_17449, score=0, range=350-373, stra  
target 5' CUUUCUUGUGCUGUGCAGUGAGUA 3'  
:  
query 3' GAAAGAACACGACACGUCACUCAU 5'  
query=miR5144-3p, target=R03G\_09967, score=0, range=350-373, stra  
target 5' CUUUCUUGUGCUGUGCAGUGAGUA 3'  
:  
query 3' GAAAGAACACGACACGUCACUCAU 5'  
query=miR5144-3p, target=R03G\_04207, score=0, range=350-373, stra  
target 5' CUUUCUUGUGCUGUGCAGUGAGUA 3'  
:  
query 3' GAAAGAACACGACACGUCACUCAU 5'  
query=miR5144-3p, target=R03G\_05267, score=0, range=350-373, stra  
target 5' CUUUCUUGUGCUGUGCAGUGAGUA 3'  
:  
query 3' GAAAGAACACGACACGUCACUCAU 5'  
query=miR5144-3p, target=R03G\_14361, score=0, range=350-373, stra  
target 5' CUUUCUUGUGCUGUGCAGUGAGUA 3'  
:  
query 3' GAAAGAACACGACACGUCACUCAU 5'  
query=miR5144-3p, target=R03G\_00256, score=0, range=350-373, stra  
target 5' CUUUCUUGUGCUGUGCAGUGAGUA 3'  
:  
query 3' GAAAGAACACGACACGUCACUCAU 5'



query=miR5144-3p, target=R03G\_05921, score=0, range=350-373, stra  
target 5' CUUUCUUGUGCUGUGCAGUGAGUA 3'  
:::::::::::::::::::::::::::  
query 3' GAAAGAACACGACACGUCACUCAU 5'  
query=miR5144-3p, target=R03G\_01942, score=0, range=350-373, stra  
target 5' CUUUCUUGUGCUGUGCAGUGAGUA 3'  
:::::::::::::::::::::::::::  
query 3' GAAAGAACACGACACGUCACUCAU 5'  
query=miR5144-3p, target=R03G\_09194, score=0, range=350-373, stra  
target 5' CUUUCUUGUGCUGUGCAGUGAGUA 3'  
:::::::::::::::::::::::::::  
query 3' GAAAGAACACGACACGUCACUCAU 5'  
query=miR5144-3p, target=R03G\_10729, score=0, range=350-373, stra  
target 5' CUUUCUUGUGCUGUGCAGUGAGUA 3'  
:::::::::::::::::::::::::::  
query 3' GAAAGAACACGACACGUCACUCAU 5'  
query=miR5144-3p, target=R03G\_05939, score=0, range=350-373, stra  
target 5' CUUUCUUGUGCUGUGCAGUGAGUA 3'  
:::::::::::::::::::::::::::  
query 3' GAAAGAACACGACACGUCACUCAU 5'  
query=miR5144-3p, target=R03G\_07124, score=0, range=350-373, stra  
target 5' CUUUCUUGUGCUGUGCAGUGAGUA 3'  
:::::::::::::::::::::::::::  
query 3' GAAAGAACACGACACGUCACUCAU 5'  
query=miR5144-3p, target=R03G\_17069, score=0, range=215-238, stra  
target 5' CUUUCUUGUGCUGUGCAGUGAGUA 3'  
:::::::::::::::::::::::::::  
query 3' GAAAGAACACGACACGUCACUCAU 5'  
query=miR5144-3p, target=R03G\_09945, score=0, range=74-97, strand  
target 5' CUUUCUUGUGCUGUGCAGUGAGUA 3'  
:::::::::::::::::::::::::::  
query 3' GAAAGAACACGACACGUCACUCAU 5'  
query=miR5144-3p, target=R03G\_15664, score=0, range=350-373, stra  
target 5' CUUUCUUGUGCUGUGCAGUGAGUA 3'  
:::::::::::::::::::::::::::  
query 3' GAAAGAACACGACACGUCACUCAU 5'  
query=miR5144-3p, target=R03G\_11264, score=0, range=350-373, stra  
target 5' CUUUCUUGUGCUGUGCAGUGAGUA 3'  
:::::::::::::::::::::::::::  
query 3' GAAAGAACACGACACGUCACUCAU 5'  
query=miR5144-3p, target=R03G\_02956, score=0, range=350-373, stra  
target 5' CUUUCUUGUGCUGUGCAGUGAGUA 3'  
:::::::::::::::::::::::::::  
query 3' GAAAGAACACGACACGUCACUCAU 5'  
query=miR5144-3p, target=R03G\_05435, score=0, range=350-373, stra

target 5' CUUUCUUGUGCUGUGCAGUGAGUA 3'  
:  
query 3' GAAAGAACACGACACGUCACUCAU 5'  
query=miR5144-3p, target=R03G\_10743, score=0, range=350-373, stra  
target 5' CUUUCUUGUGCUGUGCAGUGAGUA 3'  
:  
query 3' GAAAGAACACGACACGUCACUCAU 5'  
query=miR5144-3p, target=R03G\_07038, score=0, range=350-373, stra  
target 5' CUUUCUUGUGCUGUGCAGUGAGUA 3'  
:  
query 3' GAAAGAACACGACACGUCACUCAU 5'  
query=miR5144-3p, target=R03G\_07040, score=0, range=350-373, stra  
target 5' CUUUCUUGUGCUGUGCAGUGAGUA 3'  
:  
query 3' GAAAGAACACGACACGUCACUCAU 5'  
query=miR5144-3p, target=R03G\_07030, score=0, range=350-373, stra  
target 5' CUUUCUUGUGCUGUGCAGUGAGUA 3'  
:  
query 3' GAAAGAACACGACACGUCACUCAU 5'  
query=miR5144-3p, target=R03G\_16142, score=0, range=353-376, stra  
target 5' CUUUCUUGUGCUGUGCAGUGAGUA 3'  
:  
query 3' GAAAGAACACGACACGUCACUCAU 5'  
query=miR5144-3p, target=R03G\_05264, score=0, range=350-373, stra  
target 5' CUUUCUUGUGCUGUGCAGUGAGUA 3'  
:  
query 3' GAAAGAACACGACACGUCACUCAU 5'  
query=miR5144-3p, target=R03G\_12070, score=0, range=350-373, stra  
target 5' CUUUCUUGUGCUGUGCAGUGAGUA 3'  
:  
query 3' GAAAGAACACGACACGUCACUCAU 5'  
query=miR5144-3p, target=R03G\_16798, score=0, range=350-373, stra  
target 5' CUUUCUUGUGCUGUGCAGUGAGUA 3'  
:  
query 3' GAAAGAACACGACACGUCACUCAU 5'  
query=miR5144-3p, target=R03G\_16796, score=0, range=350-373, stra  
target 5' CUUUCUUGUGCUGUGCAGUGAGUA 3'  
:  
query 3' GAAAGAACACGACACGUCACUCAU 5'  
query=miR5144-3p, target=R03G\_04803, score=0, range=350-373, stra  
target 5' CUUUCUUGUGCUGUGCAGUGAGUA 3'  
:  
query 3' GAAAGAACACGACACGUCACUCAU 5'  
query=miR5144-3p, target=R03G\_10516, score=0, range=350-373, stra  
target 5' CUUUCUUGUGCUGUGCAGUGAGUA 3'

query 3' GAAAGAACACGACACGUCACUCAU 5'  
query=miR5144-3p, target=R03G\_05953, score=0.5, range=350-373,  
strand=-1  
target 5' CUUUUUUGUGCUGUGCAGUGAGUA 3'

query 3' GAAAGAACACGACACGUCACUCAU 5'  
query=miR5144-3p, target=R03G\_11966, score=0.5, range=350-373,  
strand=-1  
target 5' CUUUUUUGUGCUGUGCAGUGAGUA 3'

query 3' GAAAGAACACGACACGUCACUCAU 5'  
query=miR5144-3p, target=R03G\_17325, score=0.5, range=350-373,  
strand=-1  
target 5' CUUUUUUGUGCUGUGCAGUGAGUA 3'

query 3' GAAAGAACACGACACGUCACUCAU 5'  
query=miR5144-3p, target=R03G\_08660, score=0.5, range=350-373,  
strand=-1  
target 5' UUUUCUUGUGCUGUGCAGUGAGUA 3'

query 3' GAAAGAACACGACACGUCACUCAU 5'  
query=miR5144-3p, target=R03G\_07860, score=2, range=350-373, str  
target 5' CUUUCUUGUGCUCUGCAGUGAGUA 3'

query 3' GAAAGAACACGACACGUCACUCAU 5'  
query=miR5144-3p, target=R03G\_16431, score=2, range=218-241, stra  
target 5' CUUUCUUGUGCUGUACAGUGAGUA 3'

query 3' GAAAGAACACGACACGUCACUCAU 5'  
query=miR5144-3p, target=R03G\_03557, score=2, range=176-199, stra  
target 5' CUUUCUUGUGCUGCGCAGUGAGUA 3'

query 3' GAAAGAACACGACACGUCACUCAU 5'  
query=miR5144-3p, target=R03G\_05959, score=2.5, range=350-373,  
strand=-1  
target 5' CUUUUUUGUGCUGUGCAGCGAGUA 3'

query 3' GAAAGAACACGACACGUCACUCAU 5'  
query=miR5144-3p, target=R03G\_14568, score=2.5, range=350-373,  
strand=-1  
target 5' CUUUUUUGUGCUGUGCAGCGAGUA 3'

query 3' GAAAGAACACGACACGUCACUCAU 5'  
query=miR5144-3p, target=R03G\_10798, score=2.5, range=350-373,

strand=-1  
target 5' CUUUUUUGUGCUGUGCAGCGAGUA 3'  
::::: :::::  
query 3' GAAAGAACACGACACGUCACUCAU 5'  
query=miR5144-3p, target=R03G\_16689, score=2.5, range=350-373,  
strand=-1  
target 5' CUUUUUUGUGCUGUGCAGCGAGUA 3'  
::::: :::::  
query 3' GAAAGAACACGACACGUCACUCAU 5'  
query=miR5144-3p, target=R03G\_17308, score=2.5, range=350-373,  
strand=-1  
target 5' CUUUUUUGUGCUGUGCAGCGAGUA 3'  
::::: :::::  
query 3' GAAAGAACACGACACGUCACUCAU 5'  
query=miR5144-3p, target=R03G\_05628, score=2.5, range=350-373,  
strand=-1  
target 5' CUUUUUUGUGCUGUGCAGCGAGUA 3'  
::::: :::::  
query 3' GAAAGAACACGACACGUCACUCAU 5'  
query=miR5144-3p, target=R03G\_11238, score=2.5, range=218-241,  
strand=-1  
target 5' CUUUUUUGUGCUGUGCAGCGAGUA 3'  
::::: :::::  
query 3' GAAAGAACACGACACGUCACUCAU 5'  
query=miR5144-3p, target=R03G\_07103, score=2.5, range=74-97, stra  
target 5' CUUUUUUGUGCUGUGCAGCGAGUA 3'  
::::: :::::  
query 3' GAAAGAACACGACACGUCACUCAU 5'  
query=miR894, target=R03G\_07465, score=3, range=343-362, strand=1  
target 5' GAUGAACUCCGACGUGAAAC 3'  
: ::::: :::::  
query 3' CCACUUG-GGCUGCACUUUG 5'  
query=miR894, target=R03G\_04258, score=4, range=37-56, strand=1  
target 5' GAUGAACUUCGACGUGAAAC 3'  
: ::::: .:::::  
query 3' CCACUUG-GGCUGCACUUUG 5'  
query=miR894, target=R03G\_08009, score=4, range=208-227, strand=1  
target 5' GAUGAACUUCGACGUGAAAC 3'  
: ::::: .:::::  
query 3' CCACUUG-GGCUGCACUUUG 5'  
query=miR4385, target=R03G\_15671, score=0, range=1485-1506, stran  
target 5' ACCAAUCCUUUUUACAACAUUA 3'  
::::: :::::  
query 3' UGGUUAGGAAAAAUGUUGUAAU 5'  
query=miR4385, target=R03G\_15169, score=0, range=1482-1503, stran

```

target 5' ACCAAUCCUUUUUACAACAUUA 3'
::::::::::::::::::::::::::
query 3' UGGUUAGGAAAAAUGUUGUAAU 5'
query=miR4385, target=R03G_07740, score=0, range=1485-1506, stran
target 5' ACCAAUCCUUUUUACAACAUUA 3'
::::::::::::::::::::::::::
query 3' UGGUUAGGAAAAAUGUUGUAAU 5'
query=miR4385, target=R03G_01208, score=0, range=1098-1119, stran
target 5' ACCAAUCCUUUUUACAACAUUA 3'
::::::::::::::::::::::::::
query 3' UGGUUAGGAAAAAUGUUGUAAU 5'
query=miR4385, target=R03G_11965, score=0, range=1482-1503, stran
target 5' ACCAAUCCUUUUUACAACAUUA 3'
::::::::::::::::::::::::::
query 3' UGGUUAGGAAAAAUGUUGUAAU 5'
query=miR4385, target=R03G_16746, score=0, range=1284-1305, stran
target 5' ACCAAUCCUUUUUACAACAUUA 3'
::::::::::::::::::::::::::
query 3' UGGUUAGGAAAAAUGUUGUAAU 5'
query=miR4385, target=R03G_01616, score=0, range=1485-1506, stran
target 5' ACCAAUCCUUUUUACAACAUUA 3'
::::::::::::::::::::::::::
query 3' UGGUUAGGAAAAAUGUUGUAAU 5'
query=miR4385, target=R03G_05411, score=0, range=57-78, strand=-1
target 5' ACCAAUCCUUUUUACAACAUUA 3'
::::::::::::::::::::::::::
query 3' UGGUUAGGAAAAAUGUUGUAAU 5'
query=miR4385, target=R03G_10873, score=1, range=1485-1506, stran
target 5' ACCAAUCCUUUUUACAACGUUA 3'
::::::::::::::::::::::::::
query 3' UGGUUAGGAAAAAUGUUGUAAU 5'
query=miR4385, target=R03G_16691, score=1, range=1485-1506, stran
target 5' ACCAAUCCUUUUUACAACGUUA 3'
::::::::::::::::::::::::::
query 3' UGGUUAGGAAAAAUGUUGUAAU 5'
query=miR4385, target=R03G_16946, score=3.5, range=2304-2325, str
target 5' ACCAAUCCUUCUACAACAUUA 3'
::::::::: :: ::::::::::::::
query 3' UGGUUAGGAAAAAUGUUGUAAU 5'
query=miR4385, target=R03G_03357, score=4, range=1906-1927, stran
target 5' GAAAUCCUUUUUUAACAUAUG 3'
. ::::::::::::::::::::
query 3' UGGUUAGGAAAAAUGUUGUAAU 5'
query=miR4385, target=R03G_13355, score=4, range=416-438, strand=
target 5' AUCAAUCUUAUUUUACAAGAUUA 3'

```

```
.....: : : : :
query 3' UGGUUAGGA-AAAAUGUUGUAAU 5'
query=miR4385, target=R03G_10498, score=4, range=1267-1289, stran
target 5' AUGCAAUCUUUUUUACAAUAAUU 3'
.. : : : : :
query 3' UG-GUUAGGAAAAAUGUUGUAAU 5'
query=miR5239, target=R03G_00944, score=1.5, range=652-670, stran
target 5' CAUCGUAUGUUUUUCUCCCA 3'
...: : : : :
query 3' GUGG-AUACAAAAGAGGGU 5'
query=miR5239, target=R03G_04853, score=2, range=923-939, strand=
target 5' CACC-AUGUUUUUCUCCCA 3'
:::: : : : : :
query 3' GUGGAUACAAAAGAGGGU 5'
query=miR5239, target=R03G_04015, score=2, range=255-273, strand=
target 5' CACAAU AUGUUUUUCUCCCA 3'
::: : : : : :
query 3' GUG-GAUACAAAAGAGGGU 5'
query=miR5239, target=R03G_16071, score=3, range=527-544, strand=
target 5' UAUUAU AUGUUUUUCUCCUA 3'
... : : : : :
query 3' GUGGAUACAAAAGAGGGU 5'
query=miR5239, target=R03G_00647, score=3, range=1547-1564, stran
target 5' CACCCAUGUUGUCUCCCA 3'
:::: : : : : :
query 3' GUGGAUACAAAAGAGGGU 5'
query=miR5239, target=R03G_06416, score=3.5, range=2981-2998, str
target 5' UACCUAUGUUUUUCUCGCU 3'
.....: :
query 3' GUGGAUACAAAAGAGGGU 5'
query=miR5239, target=R03G_16744, score=3.5, range=2981-2998, str
target 5' UACCUAUGUUUUUCUCGCU 3'
.....: :
query 3' GUGGAUACAAAAGAGGGU 5'
query=miR5239, target=R03G_11275, score=3.5, range=2981-2998, str
target 5' UACCUAUGUUUUUCUCGCU 3'
.....: :
query 3' GUGGAUACAAAAGAGGGU 5'
query=miR5239, target=R03G_11403, score=3.5, range=2981-2998, str
target 5' UACCUAUGUUUUUCUCGCU 3'
.....: :
query 3' GUGGAUACAAAAGAGGGU 5'
query=miR5239, target=R03G_15869, score=3.5, range=2981-2998, str
target 5' UACCUAUGUUUUUCUCGCU 3'
.....: :
```

query 3' GUGGAUACAAAAGAGGGU 5'  
query=miR5239, target=R03G\_01718, score=3.5, range=2981-2998, str  
target 5' UACCUAUGUUUUCUCGCU 3'  
. :  
query 3' GUGGAUACAAAAGAGGGU 5'  
query=miR5239, target=R03G\_01203, score=3.5, range=2981-2998, str  
target 5' UACCUAUGUUUUCUCGCU 3'  
. :  
query 3' GUGGAUACAAAAGAGGGU 5'  
query=miR5239, target=R03G\_10560, score=3.5, range=2981-2998, str  
target 5' UACCUAUGUUUUCUCGCU 3'  
. :  
query 3' GUGGAUACAAAAGAGGGU 5'  
query=miR5239, target=R03G\_10555, score=3.5, range=2822-2839, str  
target 5' UACCUAUGUUUUCUCGCU 3'  
. :  
query 3' GUGGAUACAAAAGAGGGU 5'  
query=miR5239, target=R03G\_03103, score=3.5, range=2822-2839, str  
target 5' UACCUAUGUUUUCUCGCU 3'  
. :  
query 3' GUGGAUACAAAAGAGGGU 5'  
query=miR5239, target=R03G\_12979, score=3.5, range=2822-2839, str  
target 5' UACCUAUGUUUUCUCGCU 3'  
. :  
query 3' GUGGAUACAAAAGAGGGU 5'  
query=miR5239, target=R03G\_08612, score=3.5, range=2822-2839, str  
target 5' UACCUAUGUUUUCUCGCU 3'  
. :  
query 3' GUGGAUACAAAAGAGGGU 5'  
query=miR5239, target=R03G\_12087, score=3.5, range=2822-2839, str  
target 5' UACCUAUGUUUUCUCGCU 3'  
. :  
query 3' GUGGAUACAAAAGAGGGU 5'  
query=miR5239, target=R03G\_07305, score=3.5, range=2822-2839, str  
target 5' UACCUAUGUUUUCUCGCU 3'  
. :  
query 3' GUGGAUACAAAAGAGGGU 5'  
query=miR5239, target=R03G\_05280, score=3.5, range=2822-2839, str  
target 5' UACCUAUGUUUUCUCGCU 3'  
. :  
query 3' GUGGAUACAAAAGAGGGU 5'  
query=miR5239, target=R03G\_16686, score=3.5, range=2822-2839, str  
target 5' UACCUAUGUUUUCUCGCU 3'  
. :  
query 3' GUGGAUACAAAAGAGGGU 5'

query=miR5239, target=R03G\_14704, score=3.5, range=2822-2839, str  
target 5' UACCUAUGUUUUUCUCGCU 3'  
.::::: :  
query 3' GUGGAUACAAAAGAGGGU 5'  
query=miR5239, target=R03G\_05630, score=3.5, range=2741-2758, str  
target 5' UACCUAUGUUUUUCUCGCU 3'  
.::::: :  
query 3' GUGGAUACAAAAGAGGGU 5'  
query=miR5239, target=R03G\_13450, score=3.5, range=2639-2656, str  
target 5' UACCUAUGUUUUUCUCGCU 3'  
.::::: :  
query 3' GUGGAUACAAAAGAGGGU 5'  
query=miR5239, target=R03G\_13859, score=3.5, range=2606-2623, str  
target 5' UACCUAUGUUUUUCUCGCU 3'  
.::::: :  
query 3' GUGGAUACAAAAGAGGGU 5'  
query=miR5239, target=R03G\_11970, score=3.5, range=2522-2539, str  
target 5' UACCUAUGUUUUUCUCGCU 3'  
.::::: :  
query 3' GUGGAUACAAAAGAGGGU 5'  
query=miR5239, target=R03G\_02235, score=3.5, range=2165-2182, str  
target 5' UACCUAUGUUUUUCUCGCU 3'  
.::::: :  
query 3' GUGGAUACAAAAGAGGGU 5'  
query=miR5239, target=R03G\_13152, score=3.5, range=2822-2839, str  
target 5' UACCUAUGUUUUUCUCGCU 3'  
.::::: :  
query 3' GUGGAUACAAAAGAGGGU 5'  
query=miR5239, target=R03G\_03988, score=3.5, range=2822-2839, str  
target 5' UACCUAUGUUUUUCUCGCU 3'  
.::::: :  
query 3' GUGGAUACAAAAGAGGGU 5'  
query=miR5239, target=R03G\_12951, score=3.5, range=2822-2839, str  
target 5' UACCUAUGUUUUUCUCGCU 3'  
.::::: :  
query 3' GUGGAUACAAAAGAGGGU 5'  
query=miR5239, target=R03G\_09376, score=3.5, range=2860-2877, str  
target 5' UACCUAUGUUUUUCUCGCU 3'  
.::::: :  
query 3' GUGGAUACAAAAGAGGGU 5'  
query=miR5239, target=R03G\_08968, score=3.5, range=536-553, stran  
target 5' UACCUAUGUUUUUCUCGCU 3'  
.::::: :  
query 3' GUGGAUACAAAAGAGGGU 5'  
query=miR5239, target=R03G\_11785, score=3.5, range=1142-1159, str



```

target 5' UACCUAUGUUUUUCUCGCU 3'
.....:
query 3' GUGGAUACAAAAGAGGGU 5'
query=miR5239, target=R03G_05561, score=3.5, range=60-76, strand=
target 5' UACC-GUGUUUUUCUCCA 3'
....:.....:
query 3' GUGGAUACAAAAGAGGGU 5'
query=miR5239, target=R03G_01932, score=3.5, range=156-173, stran
target 5' UCCCAAUGUUUUUCUCCUA 3'
.:::.....:
query 3' GUGGAUACAAAAGAGGGU 5'
query=miR5239, target=R03G_04844, score=3.5, range=599-616, stran
target 5' CAUCUAUGUUUUUCUUCUU 3'
.....:
query 3' GUGGAUACAAAAGAGGGU 5'
query=miR5239, target=R03G_15427, score=3.5, range=502-519, stran
target 5' CACUUGUGUUUUUCUCCUC 3'
.....:
query 3' GUGGAUACAAAAGAGGGU 5'
query=miR5239, target=R03G_02549, score=3.5, range=482-499, stran
target 5' AAUCUAUGUUUUUCUGCCA 3'
.....:
query 3' GUGGAUACAAAAGAGGGU 5'
query=miR5239, target=R03G_09692, score=3.5, range=1322-1339,
strand=-1
target 5' CAUCCAUGUUUUUCUCCU 3'
....:.....:
query 3' GUGGAUACAAAAGAGGGU 5'
query=miR5239, target=R03G_10337, score=3.5, range=287-303, stran
target 5' CAUCU-UGUUUUUCUCUCA 3'
.....:
query 3' GUGGAUACAAAAGAGGGU 5'
query=miR5239, target=R03G_08982, score=3.5, range=1151-1167,
strand=-1
target 5' UAUCU-UGUUUUUCUCCCG 3'
....:.....:
query 3' GUGGAUACAAAAGAGGGU 5'
query=miR5239, target=R03G_07205, score=3.5, range=457-474, stran
target 5' CAUGUCUGUUUUUCUCCCA 3'
...:.....:
query 3' GUGGAUACAAAAGAGGGU 5'
query=miR5239, target=R03G_15947, score=4, range=887-904, strand=
target 5' UGCCUAUGUUUGCUCCUA 3'
.....:
query 3' GUGGAUACAAAAGAGGGU 5'

```

query=miR5239, target=R03G\_06471, score=4, range=186-203, strand=  
target 5' CAUUGGUGUUUUCUCCCU 3'  
.... :.....  
query 3' GUGGAUACAAAAGAGGGU 5'  
query=miR5239, target=R03G\_08009, score=4, range=1931-1949, stran  
target 5' CACAUAUGGUUUUUUCCCA 3'  
::: :: :.....  
query 3' GUGGAUA-CAAAAGAGGGU 5'  
query=miR5239, target=R03G\_13227, score=4, range=122-140, strand=  
target 5' CAACUGUGUUUAUCUCCCG 3'  
:: :..... :.....  
query 3' GUGGAUACAAA-AGAGGGU 5'  
query=miR5239, target=R03G\_15763, score=4, range=1749-1765, stran  
target 5' CAACUAUG-UUUCUCCCA 3'  
:: :..... :.....  
query 3' GUGGAUACAAAAGAGGGU 5'  
query=miR5239, target=R03G\_12102, score=4, range=1386-1402, stran  
target 5' CACCU-UGUUUGCUCCCA 3'  
:..... :..... :.....  
query 3' GUGGAUACAAAAGAGGGU 5'  
query=miR5239, target=R03G\_13417, score=4, range=78-94, strand=1  
target 5' CAAUUU-UUUUCUCCCG 3'  
:: :..... :.....  
query 3' GUGGAUACAAAAGAGGGU 5'  
query=miR5239, target=R03G\_06179, score=4, range=149-166, strand=  
target 5' UGCCUAUGUUUUCUUCUC 3'  
..... :.....  
query 3' GUGGAUACAAAAGAGGGU 5'  
query=miR5239, target=R03G\_08339, score=4, range=1322-1339, stran  
target 5' AGUCCAUGUUUUCUCCCA 3'  
... :..... :.....  
query 3' GUGGAUACAAAAGAGGGU 5'  
query=miR5239, target=R03G\_08916, score=4, range=1991-2008, stran  
target 5' CACCAAUGUCUUCUCUCA 3'  
:..... :..... :.....  
query 3' GUGGAUACAAAAGAGGGU 5'  
query=miR5239, target=R03G\_07932, score=4, range=257-274, strand=  
target 5' CACCAAUCUUUUCUCCCA 3'  
:..... :: :..... :.....  
query 3' GUGGAUACAAAAGAGGGU 5'  
query=miR5239, target=R03G\_12042, score=4, range=129-145, strand=  
target 5' CGCC-AUGUUUUCUUUCG 3'  
:..... :..... :.....  
query 3' GUGGAUACAAAAGAGGGU 5'  
query=miR5239, target=R03G\_12083, score=4, range=407-424, strand=

```

target 5' CAUCGAUGUUUUCUCCAG 3'
::: : : : : : : : : : .
query 3' GUGGAUACAAAAGAGGGU 5'
query=miR5239, target=R03G_04976, score=4, range=491-509, strand=
target 5' CGCUUUUGUUUUCUCCACA 3'
::: : : : : : : : : : ::
query 3' GUGGAUACAAAAGAGG-GU 5'
query=miR5239, target=R03G_14378, score=4, range=2288-2305, stran
target 5' CCCUCAUGUUUUCUCCG 3'
: : . : : : : : : : : .
query 3' GUGGAUACAAAAGAGGGU 5'
query=miR5239, target=R03G_13112, score=4, range=1493-1510, stran
target 5' UUUCA AUGUUUUCUCCA 3'
. . : : : : : : : : : :
query 3' GUGGAUACAAAAGAGGGU 5'
query=miR5239, target=R03G_06194, score=4, range=1364-1380, stran
target 5' CACC-AUGUAUUUCCCA 3'
:::: : : : : : : : : :
query 3' GUGGAUACAAAAGAGGGU 5'
query=miR5239, target=R03G_02877, score=4, range=105-121, strand=
target 5' CACC-AUGUUUACUCUCA 3'
:::: : : : : : : : : :
query 3' GUGGAUACAAAAGAGGGU 5'
query=miR5239, target=R03G_12241, score=4, range=376-394, strand=
target 5' CUCCAUAUGUUUUCUCUCC 3'
: : : : : : : : : : :
query 3' GUGG-AUACAAAAGAGGGU 5'
query=miR1076-5p, target=R03G_14532, score=0, range=1807-1828,
strand=1
target 5' ACAAUUAGUCGCGCUUGUGAUA 3'
: : : : : : : : : : :
query 3' UGUUAAUCAGCGCGAACACUAU 5'
query=miR1076-5p, target=R03G_14210, score=0, range=1200-1221,
strand=1
target 5' ACAAUUAGUCGCGCUUGUGAUA 3'
: : : : : : : : : : :
query 3' UGUUAAUCAGCGCGAACACUAU 5'
query=miR845a, target=R03G_15031, score=4, range=2663-2682, stran
target 5' AUCAAUUGGUGUCAGGGCAG 3'
: : : : : : : : : : :
query 3' UAGUUAACCAUAGUCUCGGC 5'
query=miR5252, target=R03G_12976, score=0, range=220-241, strand=
target 5' GCAGACUUCAGUAGCUUUACAA 3'
: : : : : : : : : : :
query 3' CGUCUGAAGUCAUCGAAAUGUU 5'

```

query=miR5252, target=R03G\_01717, score=0.5, range=220-241, stran  
target 5' GCAGGCUUCAGUAGCUUUACAA 3'  
.....  
query 3' CGUCUGAAGUCAUCGAAAUGUU 5'  
query=miR5252, target=R03G\_12011, score=0.5, range=217-238, stran  
target 5' GCAGGCUUCAGUAGCUUUACAA 3'  
.....  
query 3' CGUCUGAAGUCAUCGAAAUGUU 5'  
query=miR5252, target=R03G\_02817, score=0.5, range=220-241, stran  
target 5' GCAGGCUUCAGUAGCUUUACAA 3'  
.....  
query 3' CGUCUGAAGUCAUCGAAAUGUU 5'  
query=miR5252, target=R03G\_17433, score=0.5, range=214-235, stran  
target 5' GCAGGCUUCAGUAGCUUUACAA 3'  
.....  
query 3' CGUCUGAAGUCAUCGAAAUGUU 5'  
query=miR5252, target=R03G\_16743, score=0.5, range=163-184, stran  
target 5' GCAGGCUUCAGUAGCUUUACAA 3'  
.....  
query 3' CGUCUGAAGUCAUCGAAAUGUU 5'  
query=miR5252, target=R03G\_07692, score=0.5, range=151-172, stran  
target 5' GCAGGCUUCAGUAGCUUUACAA 3'  
.....  
query 3' CGUCUGAAGUCAUCGAAAUGUU 5'  
query=miR5252, target=R03G\_04659, score=0.5, range=151-172, stran  
target 5' GCAGGCUUCAGUAGCUUUACAA 3'  
.....  
query 3' CGUCUGAAGUCAUCGAAAUGUU 5'  
query=miR5252, target=R03G\_10043, score=0.5, range=211-232, stran  
target 5' GCAGGCUUCAGUAGCUUUACAA 3'  
.....  
query 3' CGUCUGAAGUCAUCGAAAUGUU 5'  
query=miR5252, target=R03G\_17460, score=0.5, range=241-262, stran  
target 5' GCAGGCUUCAGUAGCUUUACAA 3'  
.....  
query 3' CGUCUGAAGUCAUCGAAAUGUU 5'  
query=miR5252, target=R03G\_13452, score=0.5, range=193-214, stran  
target 5' GCAGGCUUCAGUAGCUUUACAA 3'  
.....  
query 3' CGUCUGAAGUCAUCGAAAUGUU 5'  
query=miR5252, target=R03G\_16369, score=0.5, range=196-217, stran  
target 5' GCAGGCUUCAGUAGCUUUACAA 3'  
.....  
query 3' CGUCUGAAGUCAUCGAAAUGUU 5'  
query=miR5252, target=R03G\_11543, score=0.5, range=217-238, stran



::::. :::::::::::::: ::::  
query 3' CGUCUGAAGUCAUCGAAAUGUU 5'  
query=miR1108, target=R03G\_10822, score=0, range=1093-1113, stran  
target 5' GGGCGUUAUGUUUCCAGCUUA 3'  
::::::::::::::::::::  
query 3' CCCGCAAUACAAAGGUCGAAU 5'  
query=miR1108, target=R03G\_13723, score=1.5, range=1039-1059, str  
target 5' GGAUGUUAUGUUUCCAGCUUA 3'  
:: .::::::::::::  
query 3' CCCGCAAUACAAAGGUCGAAU 5'  
query=miR1108, target=R03G\_16906, score=1.5, range=208-228, stran  
target 5' GGAUGUUAUGUUUCCAGCUUA 3'  
:: .::::::::::::  
query 3' CCCGCAAUACAAAGGUCGAAU 5'  
query=miR1108, target=R03G\_01682, score=2.5, range=985-1005, stra  
target 5' GGGUGUUAUGUUUCCAACUUA 3'  
::::.:::::::::::: ::::  
query 3' CCCGCAAUACAAAGGUCGAAU 5'  
query=miR164b, target=R03G\_14967, score=3.5, range=915-934, stran  
target 5' GUACGUCCUCUGCUUCUCCU 3'  
::::. ::::::::::::::  
query 3' CGUGCACGGGACGAAGAGGU 5'  
query=miR164b, target=R03G\_07776, score=4, range=264-282, strand=  
target 5' GAACGU-CCCUGCUUCUCUU 3'  
: :::: ::::::::::::::  
query 3' CGUGCACGGGACGAAGAGGU 5'  
query=miR164b, target=R03G\_08297, score=4, range=537-555, strand=  
target 5' GC-CAUCCCCUGCUUCUUCA 3'  
:: : : ::::::::::::::  
query 3' CGUGCACGGGACGAAGAGGU 5'  
query=miR5658, target=R03G\_16744, score=0, range=3642-3663, stran  
target 5' UUCUGCAACAUCAUCAUCA 3'  
::::::::::::::::::::  
query 3' AAGACGUUGUAGUAGUAGUAGU 5'  
query=miR5658, target=R03G\_01203, score=0, range=3642-3663, stran  
target 5' UUCUGCAACAUCAUCAUCA 3'  
::::::::::::::::::::  
query 3' AAGACGUUGUAGUAGUAGUAGU 5'  
query=miR5658, target=R03G\_11403, score=0, range=3642-3663, stran  
target 5' UUCUGCAACAUCAUCAUCA 3'  
::::::::::::::::::::  
query 3' AAGACGUUGUAGUAGUAGUAGU 5'  
query=miR5658, target=R03G\_06416, score=0, range=3642-3663, stran  
target 5' UUCUGCAACAUCAUCAUCA 3'  
::::::::::::::::::::

query 3' AAGACGUUGUAGUAGUAGUAGU 5'  
query=miR5658, target=R03G\_01718, score=0, range=3642-3663, stran  
target 5' UUCUGCAACAUCAUCAUCAUCA 3'  
.....  
query 3' AAGACGUUGUAGUAGUAGUAGU 5'  
query=miR5658, target=R03G\_15869, score=0, range=3642-3663, stran  
target 5' UUCUGCAACAUCAUCAUCAUCAUCA 3'  
.....  
query 3' AAGACGUUGUAGUAGUAGUAGU 5'  
query=miR5658, target=R03G\_10560, score=0, range=3642-3663, stran  
target 5' UUCUGCAACAUCAUCAUCAUCAUCA 3'  
.....  
query 3' AAGACGUUGUAGUAGUAGUAGU 5'  
query=miR5658, target=R03G\_11275, score=0, range=3642-3663, stran  
target 5' UUCUGCAACAUCAUCAUCAUCAUCA 3'  
.....  
query 3' AAGACGUUGUAGUAGUAGUAGU 5'  
query=miR5658, target=R03G\_14704, score=0, range=3483-3504, stran  
target 5' UUCUGCAACAUCAUCAUCAUCAUCA 3'  
.....  
query 3' AAGACGUUGUAGUAGUAGUAGU 5'  
query=miR5658, target=R03G\_12979, score=0, range=3483-3504, stran  
target 5' UUCUGCAACAUCAUCAUCAUCAUCA 3'  
.....  
query 3' AAGACGUUGUAGUAGUAGUAGU 5'  
query=miR5658, target=R03G\_10555, score=0, range=3483-3504, stran  
target 5' UUCUGCAACAUCAUCAUCAUCAUCA 3'  
.....  
query 3' AAGACGUUGUAGUAGUAGUAGU 5'  
query=miR5658, target=R03G\_05280, score=0, range=3483-3504, stran  
target 5' UUCUGCAACAUCAUCAUCAUCAUCA 3'  
.....  
query 3' AAGACGUUGUAGUAGUAGUAGU 5'  
query=miR5658, target=R03G\_16686, score=0, range=3483-3504, stran  
target 5' UUCUGCAACAUCAUCAUCAUCAUCA 3'  
.....  
query 3' AAGACGUUGUAGUAGUAGUAGU 5'  
query=miR5658, target=R03G\_07305, score=0, range=3483-3504, stran  
target 5' UUCUGCAACAUCAUCAUCAUCAUCA 3'  
.....  
query 3' AAGACGUUGUAGUAGUAGUAGU 5'  
query=miR5658, target=R03G\_03103, score=0, range=3483-3504, stran  
target 5' UUCUGCAACAUCAUCAUCAUCAUCA 3'  
.....  
query 3' AAGACGUUGUAGUAGUAGUAGU 5'

query=miR5658, target=R03G\_12087, score=0, range=3483-3504, stran  
target 5' UUCUGCAACAUCAUCAUCA 3'  
:::::::::::  
query 3' AAGACGUUGUAGUAGUAGUAGU 5'  
query=miR5658, target=R03G\_08612, score=0, range=3483-3504, stran  
target 5' UUCUGCAACAUCAUCAUCA 3'  
:::::::::::  
query 3' AAGACGUUGUAGUAGUAGUAGU 5'  
query=miR5658, target=R03G\_05630, score=0, range=3402-3423, stran  
target 5' UUCUGCAACAUCAUCAUCA 3'  
:::::::::::  
query 3' AAGACGUUGUAGUAGUAGUAGU 5'  
query=miR5658, target=R03G\_13450, score=0, range=3300-3321, stran  
target 5' UUCUGCAACAUCAUCAUCA 3'  
:::::::::::  
query 3' AAGACGUUGUAGUAGUAGUAGU 5'  
query=miR5658, target=R03G\_13859, score=0, range=3267-3288, stran  
target 5' UUCUGCAACAUCAUCAUCA 3'  
:::::::::::  
query 3' AAGACGUUGUAGUAGUAGUAGU 5'  
query=miR5658, target=R03G\_02235, score=0, range=2826-2847, stran  
target 5' UUCUGCAACAUCAUCAUCA 3'  
:::::::::::  
query 3' AAGACGUUGUAGUAGUAGUAGU 5'  
query=miR5658, target=R03G\_13152, score=0, range=3483-3504, stran  
target 5' UUCUGCAACAUCAUCAUCA 3'  
:::::::::::  
query 3' AAGACGUUGUAGUAGUAGUAGU 5'  
query=miR5658, target=R03G\_12193, score=0, range=489-510, strand=  
target 5' UUCUGCAACAUCAUCAUCA 3'  
:::::::::::  
query 3' AAGACGUUGUAGUAGUAGUAGU 5'  
query=miR5658, target=R03G\_03990, score=0, range=240-261, strand=  
target 5' UUCUGCAACAUCAUCAUCA 3'  
:::::::::::  
query 3' AAGACGUUGUAGUAGUAGUAGU 5'  
query=miR5658, target=R03G\_10467, score=2, range=180-201, strand=  
target 5' UUCUUCAUCAUCAUCAUCA 3'  
:::: :: :::::::::::::  
query 3' AAGACGUUGUAGUAGUAGUAGU 5'  
query=miR5658, target=R03G\_15427, score=2, range=633-654, strand=  
target 5' UUCUUCAUCAUCAUCAUCA 3'  
:::: :: :::::::::::::  
query 3' AAGACGUUGUAGUAGUAGUAGU 5'  
query=miR5658, target=R03G\_14198, score=2.5, range=29-50, strand=



target 5' UUUACCAACAUCAUCAUCA 3'  
::: ::::::::::::::::::::  
query 3' AAGACGUUGUAGUAGUAGUAGU 5'  
query=miR5658, target=R03G\_16068, score=2.5, range=1575-1596,  
strand=-1  
target 5' UUCUCAAUAUCAUCGUCAUCA 3'  
:::: ::::::::::::::::::::  
query 3' AAGACGUUGUAGUAGUAGUAGU 5'  
query=miR5658, target=R03G\_16449, score=2.5, range=381-402, stran  
target 5' UUCGGCAGCAUUAUCAUCAUCA 3'  
::: ::::::::::::::::::::  
query 3' AAGACGUUGUAGUAGUAGUAGU 5'  
query=miR5658, target=R03G\_03951, score=2.5, range=675-696, stran  
target 5' UUCUCAAUAUCAUCAUCAUCA 3'  
:::: :: .::::::::::::::::::  
query 3' AAGACGUUGUAGUAGUAGUAGU 5'  
query=miR5658, target=R03G\_15960, score=3, range=1604-1625, stran  
target 5' AACAGCAACAUCAUCAUCAUCA 3'  
: ::::::::::::::::::::  
query 3' AAGACGUUGUAGUAGUAGUAGU 5'  
query=miR5658, target=R03G\_16962, score=3, range=389-410, strand=  
target 5' UUGUCCAUCAUCAUCAUCAUCA 3'  
:: : :: ::::::::::::::::::::  
query 3' AAGACGUUGUAGUAGUAGUAGU 5'  
query=miR5658, target=R03G\_14668, score=3, range=3063-3084, stran  
target 5' UUCUACAUCAUCAUCGUCAUCA 3'  
:::: :: ::::::::::::::::::::  
query 3' AAGACGUUGUAGUAGUAGUAGU 5'  
query=miR5658, target=R03G\_03214, score=3, range=810-831, strand=  
target 5' UUCUUAUCGUCAUCAUCAUCA 3'  
:::: :: .::::::::::::::::::  
query 3' AAGACGUUGUAGUAGUAGUAGU 5'  
query=miR5658, target=R03G\_08049, score=3, range=474-495, strand=  
target 5' UUCUUAUCAUCAUCAUCAUCGUCA 3'  
:::: :: ::::::::::::::::::::  
query 3' AAGACGUUGUAGUAGUAGUAGU 5'  
query=miR5658, target=R03G\_11363, score=3, range=981-1002, strand  
target 5' UUCAUAGCAUCAUCAUCAUCA 3'  
::: .::::::::::::::::::  
query 3' AAGACGUUGUAGUAGUAGUAGU 5'  
query=miR5658, target=R03G\_02468, score=3, range=102-123, strand=  
target 5' UUCUUAAGAUCGUCAUCAUCA 3'  
:::: ::: ::::::::::::::::::::  
query 3' AAGACGUUGUAGUAGUAGUAGU 5'  
query=miR5658, target=R03G\_06266, score=3, range=1425-1446, stran

target 5' UUCUUCAUCAUCAUCAUCU 3'  
:::: :: ::::::::::::::  
query 3' AAGACGUUGUAGUAGUAGUAGU 5'  
query=miR5658, target=R03G\_13668, score=3, range=216-237, strand=  
target 5' AUCAGCAUCAUCAUCAUCA 3'  
:: ::: ::::::::::::::  
query 3' AAGACGUUGUAGUAGUAGUAGU 5'  
query=miR5658, target=R03G\_00068, score=3, range=933-954, strand=  
target 5' UUCAUCAUCAUCAUCAUCA 3'  
::: :: ::::::::::::::  
query 3' AAGACGUUGUAGUAGUAGUAGU 5'  
query=miR5658, target=R03G\_05239, score=3, range=102-122, strand=  
target 5' UUAU-CAUCAUCAUCAUCA 3'  
:: : :: ::::::::::::::  
query 3' AAGACGUUGUAGUAGUAGUAGU 5'  
query=miR5658, target=R03G\_01410, score=3.5, range=438-459, stran  
target 5' AUCUUUAUCAUCAUCAUCA 3'  
::: .: ::::::::::::::  
query 3' AAGACGUUGUAGUAGUAGUAGU 5'  
query=miR5658, target=R03G\_12605, score=3.5, range=111-132, stran  
target 5' UUCUUUAGCAUUAUCAUCAUCG 3'  
:::: .: ::::::::::::::  
query 3' AAGACGUUGUAGUAGUAGUAGU 5'  
query=miR5658, target=R03G\_14141, score=3.5, range=528-549, stran  
target 5' AUGUGUAACAUUAUCAUCAUCA 3'  
: ::::::::::::::  
query 3' AAGACGUUGUAGUAGUAGUAGU 5'  
query=miR5658, target=R03G\_06694, score=3.5, range=645-666, stran  
target 5' UUUUGCAUCAUCAUCAUCAUCA 3'  
::: ::: ::::::::::::::  
query 3' AAGACGUUGUAGUAGUAGUAGU 5'  
query=miR5658, target=R03G\_14413, score=3.5, range=1110-1131,  
strand=-1  
target 5' UUCUUCAUCAUCGUCAUCAUCG 3'  
:::: :: ::::::::::::::  
query 3' AAGACGUUGUAGUAGUAGUAGU 5'  
query=miR5658, target=R03G\_16322, score=3.5, range=1824-1845,  
strand=-1  
target 5' UUCAAUGAUUAUCAUCAUCAUCA 3'  
::: .: ::::::::::::::  
query 3' AAGACGUUGUAGUAGUAGUAGU 5'  
query=miR5658, target=R03G\_12515, score=3.5, range=189-210, stran  
target 5' CUCUUCAAUAUCAUCAUCAUCA 3'  
::: .: ::::::::::::::  
query 3' AAGACGUUGUAGUAGUAGUAGU 5'

query=miR5658, target=R03G\_04817, score=3.5, range=2901-2922,  
strand=-1  
target 5' UUCGUCAGCAUCAUCAUCU 3'  
::: :::::::::::::::  
query 3' AAGACGUUGUAGUAGUAGU 5'  
query=miR5658, target=R03G\_14543, score=3.5, range=1563-1584,  
strand=-1  
target 5' CUCUUUAUCAUCAUCAUCA 3'  
::: .: :::::::::::::::  
query 3' AAGACGUUGUAGUAGUAGU 5'  
query=miR5658, target=R03G\_13781, score=3.5, range=210-232, stran  
target 5' AUUUGUCAUCAUCAUCAUCA 3'  
::: ::: :::::::::::::::  
query 3' AAGAC-GUUGUAGUAGUAGU 5'  
query=miR5658, target=R03G\_03274, score=3.5, range=840-860, stran  
target 5' AUCU-CAUCAUCAUCAUCG 3'  
::: ::: :::::::::::::::  
query 3' AAGACGUUGUAGUAGUAGU 5'  
query=miR5658, target=R03G\_08260, score=3.5, range=330-350, stran  
target 5' UCCUGU-UCAUCAUCAUCAUCA 3'  
: ::: .: :::::::::::::::  
query 3' AAGACGUUGUAGUAGUAGU 5'  
query=miR5658, target=R03G\_16243, score=3.5, range=1164-1184,  
strand=-1  
target 5' AUUUGCAA-AUCAUCAUUAUCA 3'  
: ::: .: :::::::::::::::  
query 3' AAGACGUUGUAGUAGUAGU 5'  
query=miR5658, target=R03G\_07768, score=4, range=861-881, strand=  
target 5' UUCU-CAAAAUCAUUAUCAUUA 3'  
: ::: .: :::::::::::::::  
query 3' AAGACGUUGUAGUAGUAGU 5'  
query=miR5658, target=R03G\_06536, score=4, range=395-416, strand=  
target 5' AACAACAACAUCAUCAUCAUCA 3'  
: ::: .: :::::::::::::::  
query 3' AAGACGUUGUAGUAGUAGU 5'  
query=miR5658, target=R03G\_07545, score=4, range=444-465, strand=  
target 5' ACCUGCUCCAUCAUCAUCAUCA 3'  
: ::: .: :::::::::::::::  
query 3' AAGACGUUGUAGUAGUAGU 5'  
query=miR5658, target=R03G\_09577, score=4, range=261-282, strand=  
target 5' CGCUGAAUCAUCAUCAUCAUCA 3'  
: ::: .: :::::::::::::::  
query 3' AAGACGUUGUAGUAGUAGU 5'  
query=miR5658, target=R03G\_03075, score=4, range=1070-1091, stran  
target 5' AUCAUCACCAUCAUCAUCAUCA 3'

:: :: :::::::::::::::  
query 3' AAGACGUUGUAGUAGUAGUAGU 5'  
query=miR5658, target=R03G\_03827, score=4, range=1064-1085, stran  
target 5' AUCAUCAUCAUCAUCAUCA 3'  
:: :: :::::::::::::::  
query 3' AAGACGUUGUAGUAGUAGUAGU 5'  
query=miR5658, target=R03G\_13341, score=4, range=606-626, strand=  
target 5' AUCUUC-ACGUCAUCAUCAUCA 3'  
::: : :::::::::::::::  
query 3' AAGACGUUGUAGUAGUAGUAGU 5'  
query=miR5658, target=R03G\_00729, score=4, range=1058-1079, stran  
target 5' AUCAUCAUCAUCAUCAUCA 3'  
:: :: :::::::::::::::  
query 3' AAGACGUUGUAGUAGUAGUAGU 5'  
query=miR5658, target=R03G\_03011, score=4, range=380-401, strand=  
target 5' GUCGUCAUCAUCAUCAUCAUCA 3'  
:: :: :::::::::::::::  
query 3' AAGACGUUGUAGUAGUAGUAGU 5'  
query=miR5658, target=R03G\_06138, score=4, range=612-634, strand=  
target 5' AUCAGCAUCUAUCAUCAUCAUCA 3'  
:: ::: : :::::::::::::::  
query 3' AAGACGUUG-UAGUAGUAGUAGU 5'  
query=miR5658, target=R03G\_00266, score=4, range=1206-1226, stran  
target 5' CCCU-CAUCAUCAUCAUCAUCA 3'  
:: :: :::::::::::::::  
query 3' AAGACGUUGUAGUAGUAGUAGU 5'  
query=miR5658, target=R03G\_09516, score=4, range=242-262, strand=  
target 5' UUAU-UAUUAUCAUCAUCAUCA 3'  
:: : .: :::::::::::::::  
query 3' AAGACGUUGUAGUAGUAGUAGU 5'  
query=miR5658, target=R03G\_09649, score=4, range=586-606, strand=  
target 5' CUUUGUAA-AUCAUCAUCAUCC 3'  
:.....: :::::::::::::::  
query 3' AAGACGUUGUAGUAGUAGUAGU 5'  
query=miR5658, target=R03G\_14098, score=4, range=1632-1653, stran  
target 5' UUCUGCAACGUCAUCUUCAUCU 3'  
:.....: :::::::::::::::  
query 3' AAGACGUUGUAGUAGUAGUAGU 5'  
query=miR5658, target=R03G\_06174, score=4, range=1053-1074, stran  
target 5' UUCUGCAUCGUCAUCGUCAUCC 3'  
:.....: :::::::::::::::  
query 3' AAGACGUUGUAGUAGUAGUAGU 5'  
query=miR5658, target=R03G\_14654, score=4, range=543-564, strand=  
target 5' AUCUGCAACAUCAUUAGCAUCA 3'  
:.....: :::::::::::::::

query 3' AAGACGUUGUAGUAGUAGUAGU 5'  
query=miR5658, target=R03G\_15062, score=4, range=420-441, strand=  
target 5' UUCUUCUACAUAUCGUCAUCA 3'  
:::: : :::::::::::::::  
query 3' AAGACGUUGUAGUAGUAGUAGU 5'  
query=miR5658, target=R03G\_17136, score=4, range=909-930, strand=  
target 5' UUGUGAGAUAUCAUCAUUAUCA 3'  
:: :: .:::::::::::::  
query 3' AAGACGUUGUAGUAGUAGUAGU 5'  
query=miR5658, target=R03G\_04521, score=4, range=186-207, strand=  
target 5' AACUGCAUCGUCAUCAUCAUCA 3'  
::::: .:::::::::::::  
query 3' AAGACGUUGUAGUAGUAGUAGU 5'  
query=miR5658, target=R03G\_17058, score=4, range=402-423, strand=  
target 5' UUUGGUAUCAUCAUCAUUA 3'  
::: .::: :::::::::::::::  
query 3' AAGACGUUGUAGUAGUAGUAGU 5'  
query=miR5658, target=R03G\_05224, score=4, range=477-498, strand=  
target 5' UUCAACAGCAUCAUCGUCAUCG 3'  
::: .:::::::::::::  
query 3' AAGACGUUGUAGUAGUAGUAGU 5'  
query=miR5658, target=R03G\_10411, score=4, range=3885-3906, stran  
target 5' CUCUUCAUCAUCAUCAUCGUCA 3'  
::: ::: :::::::::::::::  
query 3' AAGACGUUGUAGUAGUAGUAGU 5'  
query=miR5658, target=R03G\_12721, score=4, range=1383-1404, stran  
target 5' AUUUUCGUCAUCAUCAUCAUCA 3'  
::: .: .:::::::::::::  
query 3' AAGACGUUGUAGUAGUAGUAGU 5'  
query=miR5658, target=R03G\_02346, score=4, range=1554-1575, stran  
target 5' UUCUUCUACAUCAUCAUCAUUC 3'  
::::: : :::::::::::::::  
query 3' AAGACGUUGUAGUAGUAGUAGU 5'  
query=miR5658, target=R03G\_07465, score=4, range=1080-1101, stran  
target 5' GUCGGCAUCAUCGUCAUCAUCA 3'  
::: ::: :::::::::::::::  
query 3' AAGACGUUGUAGUAGUAGUAGU 5'  
query=miR5658, target=R03G\_04437, score=4, range=66-87, strand=-1  
target 5' UUCUUCAACAUCUUCAUCAUCC 3'  
::::: :::::::::::::::  
query 3' AAGACGUUGUAGUAGUAGUAGU 5'  
query=miR5658, target=R03G\_11688, score=4, range=1029-1050, stran  
target 5' CUCUUCGUUAUCAUCAUCAUCA 3'  
::: .: .:::::::::::::  
query 3' AAGACGUUGUAGUAGUAGUAGU 5'

query=miR5658, target=R03G\_09578, score=4, range=2882-2902, stran  
target 5' UUCU-UGACAUCAUCAUGA 3'  
:::: ..:::::::::::: :  
query 3' AAGACGUUGUAGUAGUAGUAGU 5'  
query=miR5658, target=R03G\_06187, score=4, range=423-444, strand=  
target 5' UUCUUCAUCAUCAUCGUCU 3'  
:::: :: ::::::::::::::  
query 3' AAGACGUUGUAGUAGUAGUAGU 5'  
query=miR5658, target=R03G\_10170, score=4, range=3336-3356, stran  
target 5' UUUUUUAA-AUCAUCGUCAUCA 3'  
:::: .:: ::::::::::::::  
query 3' AAGACGUUGUAGUAGUAGUAGU 5'  
query=miR5658, target=R03G\_10853, score=4, range=138-158, strand=  
target 5' UUUUG-AAUAUCUUCAUCAUCA 3'  
::::: :::::: ::::::::::::::  
query 3' AAGACGUUGUAGUAGUAGUAGU 5'  
query=miR5658, target=R03G\_05884, score=4, range=2109-2131, stran  
target 5' UGCUGUCAUCAUCAUCGUCAUCA 3'  
: ::: :: ::::::::::::::  
query 3' AAGAC-GUUGUAGUAGUAGUAGU 5'  
query=miR5658, target=R03G\_08246, score=4, range=207-227, strand=  
target 5' UUC-GUAUCAUCAUCAUUG 3'  
::: .: ::::::::::::::  
query 3' AAGACGUUGUAGUAGUAGUAGU 5'  
query=miR5658, target=R03G\_10143, score=4, range=252-273, strand=  
target 5' UUCUUUUGCAUCAUCAUCAUCC 3'  
:::: . .::::::::::::  
query 3' AAGACGUUGUAGUAGUAGUAGU 5'  
query=miR5658, target=R03G\_02328, score=4, range=540-561, strand=  
target 5' UUCUUCAUCAUCUUCAUCAUCA 3'  
:::: :: :::::: ::::::::::::::  
query 3' AAGACGUUGUAGUAGUAGUAGU 5'  
query=miR5658, target=R03G\_10942, score=4, range=456-477, strand=  
target 5' UUCCUCAUCAUCAUCGUCAUCA 3'  
::: :: ::::::::::::::  
query 3' AAGACGUUGUAGUAGUAGUAGU 5'  
query=miR5658, target=R03G\_16404, score=4, range=1539-1560, stran  
target 5' AUCACCAUCAUCAUCAUCAUCA 3'  
:: :: ::::::::::::::  
query 3' AAGACGUUGUAGUAGUAGUAGU 5'  
query=miR5658, target=R03G\_03908, score=4, range=2556-2577, stran  
target 5' UUCUUCUUCAUCAUCAUCAUCU 3'  
:::: : ::::::::::::::  
query 3' AAGACGUUGUAGUAGUAGUAGU 5'  
query=miR5658, target=R03G\_15942, score=4, range=177-198, strand=

```

target 5' GUCUACUUCAUCAUCAUCA 3'
::: : ::::::::::::::::::::
query 3' AAGACGUUGUAGUAGUAGUAGU 5'
query=miR5658, target=R03G_15993, score=4, range=723-744, strand=
target 5' GUCAUCAUCAUCAUCAUCA 3'
:: :: ::::::::::::::::::::
query 3' AAGACGUUGUAGUAGUAGUAGU 5'
query=miR5658, target=R03G_09445, score=4, range=513-534, strand=
target 5' AUCAUCAUCAUCAUCAUCA 3'
:: :: ::::::::::::::::::::
query 3' AAGACGUUGUAGUAGUAGUAGU 5'
query=miR5658, target=R03G_01836, score=4, range=243-264, strand=
target 5' AUCAUCAUCAUCAUCAUCA 3'
:: :: ::::::::::::::::::::
query 3' AAGACGUUGUAGUAGUAGUAGU 5'
query=miR5658, target=R03G_04948, score=4, range=426-447, strand=
target 5' GUCCUCAUCAUCAUCAUCA 3'
:: :: ::::::::::::::::::::
query 3' AAGACGUUGUAGUAGUAGUAGU 5'
query=miR5658, target=R03G_00749, score=4, range=972-994, strand=
target 5' CUCUGAAUAUCAUCAUCAUCA 3'
::::::::::: ::::::::::::::::::::
query 3' AAGACGUUGUAG-UAGUAGUAGU 5'
query=miR5658, target=R03G_03069, score=4, range=900-921, strand=
target 5' UUAUUCUCAUCAUCAUCAUCA 3'
:: : : ::::::::::::::::::::
query 3' AAGACGUUGUAGUAGUAGUAGU 5'
query=miR5658, target=R03G_05036, score=4, range=789-810, strand=
target 5' UUAUACUUCAUCAUCAUCAUCA 3'
:: : : ::::::::::::::::::::
query 3' AAGACGUUGUAGUAGUAGUAGU 5'
query=miR5658, target=R03G_10266, score=4, range=726-747, strand=
target 5' UUAUUCAUAAUCAUCAUCAUCA 3'
:: : :: ::::::::::::::::::::
query 3' AAGACGUUGUAGUAGUAGUAGU 5'
query=miR5658, target=R03G_13923, score=4, range=228-248, strand=
target 5' UUAU-UAUUAUCAUCAUCAUCA 3'
:: : .: . ::::::::::::::::::::
query 3' AAGACGUUGUAGUAGUAGUAGU 5'
query=miR5658, target=R03G_01085, score=4, range=945-965, strand=
target 5' AUCUGUAA-AUCAUCAUUAUCG 3'
::::::::::: ::::::::::::::::::::
query 3' AAGACGUUGUAGUAGUAGUAGU 5'
query=miR5658, target=R03G_02346, score=4, range=1734-1755, stran
target 5' UUCUUCUACAUCAUCAUCAUC 3'

```

:::: : :::::::::::::::  
query 3' AAGACGUUGUAGUAGUAGUAGU 5'  
query=miR5658, target=R03G\_04948, score=4, range=393-414, strand=  
target 5' AUCAUCACCAUCAUCAUCA 3'  
:: :: :::::::::::::::  
query 3' AAGACGUUGUAGUAGUAGUAGU 5'  
query=miR5658, target=R03G\_02346, score=4, range=2379-2400, stran  
target 5' UUCUUCUACAUCAUCAUCAUUC 3'  
:::: : :::::::::::::::  
query 3' AAGACGUUGUAGUAGUAGUAGU 5'  
query=miR8034, target=R03G\_08042, score=0, range=1280-1300, stran  
target 5' AGUUUGUGCAGGCUUGUCAUA 3'  
:::::::::::::::::::::  
query 3' UCAAACACGUCCGAACAGUAU 5'  
query=miR8034, target=R03G\_07976, score=1, range=1745-1765, stran  
target 5' AGUUUGUACAGGCUUGUCAUA 3'  
:::::::::: : :::::::::::::::  
query 3' UCAAACACGUCCGAACAGUAU 5'  
query=miR8034, target=R03G\_03580, score=2, range=1673-1693, stran  
target 5' AGUUUGUGCAGGCCUGUCAUA 3'  
:::::::::::::::::::: : :::::::::::::::  
query 3' UCAAACACGUCCGAACAGUAU 5'  
query=miR8034, target=R03G\_11531, score=2, range=1241-1261, stran  
target 5' AGUUUGUGCAGGCCUGUCAUA 3'  
:::::::::::::::::::: : :::::::::::::::  
query 3' UCAAACACGUCCGAACAGUAU 5'  
query=miR8034, target=R03G\_03589, score=2, range=1673-1693, stran  
target 5' AGUUUGUGCAGGCCUGUCAUA 3'  
:::::::::::::::::::: : :::::::::::::::  
query 3' UCAAACACGUCCGAACAGUAU 5'  
query=miR8034, target=R03G\_15580, score=2, range=1712-1732, stran  
target 5' AGUUUGUGCAGGCCUGUCAUA 3'  
:::::::::::::::::::: : :::::::::::::::  
query 3' UCAAACACGUCCGAACAGUAU 5'  
query=miR8034, target=R03G\_07686, score=3, range=1748-1768, stran  
target 5' AGUUUGUACAGGCCUGUCAUA 3'  
:::::::::: : ::::: : :::::::::::::::  
query 3' UCAAACACGUCCGAACAGUAU 5'  
query=miR8034, target=R03G\_16138, score=3, range=1748-1768, stran  
target 5' AGUUUGUACAGGCCUGUCAUA 3'  
:::::::::: : ::::: : :::::::::::::::  
query 3' UCAAACACGUCCGAACAGUAU 5'  
query=miR8034, target=R03G\_11771, score=3, range=1748-1768, stran  
target 5' AGUUUGUACAGGCCUGUCAUA 3'  
:::::::::: : ::::: : :::::::::::::::





query=miR8034, target=R03G\_01309, score=3, range=1697-1717, stran  
 target 5' AGUUUGUACAGGCCUGUCAUA 3'  
 :::::::::: ::::: ::::::::::  
 query 3' UCAAACACGUCCGAACAGUAU 5'  
 query=miR8034, target=R03G\_17441, score=3, range=1475-1495, stran  
 target 5' AGUUUGUACAGGCCUGUCAUA 3'  
 :::::::::: ::::: ::::::::::  
 query 3' UCAAACACGUCCGAACAGUAU 5'  
 query=miR8034, target=R03G\_10522, score=3, range=1712-1732, stran  
 target 5' AGUUUGUACAGGCCUGUCAUA 3'  
 :::::::::: ::::: ::::::::::  
 query 3' UCAAACACGUCCGAACAGUAU 5'  
 query=miR8034, target=R03G\_07294, score=3, range=1349-1369, stran  
 target 5' AGUUUGUACAGGCCUGUCAUA 3'  
 :::::::::: ::::: ::::::::::  
 query 3' UCAAACACGUCCGAACAGUAU 5'  
 query=miR8034, target=R03G\_04785, score=3, range=1712-1732, stran  
 target 5' AGUUUGUACAGGCCUGUCAUA 3'  
 :::::::::: ::::: ::::::::::  
 query 3' UCAAACACGUCCGAACAGUAU 5'  
 query=miR8034, target=R03G\_03555, score=3, range=1748-1768, stran  
 target 5' AGUUUGUACAGGCCUGUCAUA 3'  
 :::::::::: ::::: ::::::::::  
 query 3' UCAAACACGUCCGAACAGUAU 5'  
 query=miR8034, target=R03G\_01954, score=3, range=698-718, strand=  
 target 5' AGUUUGUACAGGCCUGUCAUA 3'  
 :::::::::: ::::: ::::::::::  
 query 3' UCAAACACGUCCGAACAGUAU 5'  
 query=miR8034, target=R03G\_13148, score=3, range=1481-1501, stran  
 target 5' AGUUUGUACAGGCCUGUCAUA 3'  
 :::::::::: ::::: ::::::::::  
 query 3' UCAAACACGUCCGAACAGUAU 5'  
 query=miR8034, target=R03G\_07128, score=3, range=266-286, strand=  
 target 5' AGUUUGUACAGGCCUGUCAUA 3'  
 :::::::::: ::::: ::::::::::  
 query 3' UCAAACACGUCCGAACAGUAU 5'  
 query=miR8034, target=R03G\_16738, score=3, range=665-685, strand=  
 target 5' AGUUUGUACAGGCCUGUCAUA 3'  
 :::::::::: ::::: ::::::::::  
 query 3' UCAAACACGUCCGAACAGUAU 5'  
 query=miR8034, target=R03G\_12009, score=3.5, range=1748-1768, str  
 target 5' GGUUUGUACAGGCCUGUCAUA 3'  
 .:::::::: ::::: ::::::::::  
 query 3' UCAAACACGUCCGAACAGUAU 5'  
 query=miR8034, target=R03G\_13747, score=3.5, range=1748-1768, str

```

target 5' GGUUUGUACAGGCCUGUCAUA 3'
.:.:.:.:.:.:.:.:.:.:.:.:.:.:.:.:.:.:.:.:.:.:.:.:.:.:.:.:.:.
query 3' UCAAACACGUCCGAACAGUAU 5'
query=miR8034, target=R03G_11404, score=3.5, range=1748-1768, str
target 5' GGUUUGUACAGGCCUGUCAUA 3'
.:.:.:.:.:.:.:.:.:.:.:.:.:.:.:.:.:.:.:.:.:.:.:.:.:.:.:.:.
query 3' UCAAACACGUCCGAACAGUAU 5'
query=miR8034, target=R03G_05139, score=4, range=1390-1410, stran
target 5' AGUUUCAGCAGGCUUGUUAUU 3'
.:.:.:.:.:.:.:.:.:.:.:.:.:.:.:.:.:.:.:.:.:.:.:.:.:.:.:.
query 3' UCAAACACGUCCGAACAGUAU 5'
query=miR5506, target=R03G_13745, score=0, range=660-677, strand=
target 5' CCUCAACGAAGCGAUCUA 3'
.:.:.:.:.:.:.:.:.:.:.:.:.:.:.:.:.:.:.:.:.:.:.:.:.:.:.
query 3' GGAGUUGCUUCGCUAGAU 5'
query=miR5506, target=R03G_05524, score=0, range=660-677, strand=
target 5' CCUCAACGAAGCGAUCUA 3'
.:.:.:.:.:.:.:.:.:.:.:.:.:.:.:.:.:.:.:.:.:.:.:.:.:.
query 3' GGAGUUGCUUCGCUAGAU 5'
query=miR5506, target=R03G_12964, score=0, range=660-677, strand=
target 5' CCUCAACGAAGCGAUCUA 3'
.:.:.:.:.:.:.:.:.:.:.:.:.:.:.:.:.:.:.:.:.:.:.:.:.
query 3' GGAGUUGCUUCGCUAGAU 5'
query=miR5506, target=R03G_11952, score=0, range=1038-1055, stran
target 5' CCUCAACGAAGCGAUCUA 3'
.:.:.:.:.:.:.:.:.:.:.:.:.:.:.:.:.:.:.:.:.:.:.:.
query 3' GGAGUUGCUUCGCUAGAU 5'
query=miR5506, target=R03G_12669, score=0, range=660-677, strand=
target 5' CCUCAACGAAGCGAUCUA 3'
.:.:.:.:.:.:.:.:.:.:.:.:.:.:.:.:.:.:.:.:.:.:.
query 3' GGAGUUGCUUCGCUAGAU 5'
query=miR5506, target=R03G_16708, score=0, range=660-677, strand=
target 5' CCUCAACGAAGCGAUCUA 3'
.:.:.:.:.:.:.:.:.:.:.:.:.:.:.:.:.:.:.:.:.:.
query 3' GGAGUUGCUUCGCUAGAU 5'
query=miR5506, target=R03G_12075, score=0, range=660-677, strand=
target 5' CCUCAACGAAGCGAUCUA 3'
.:.:.:.:.:.:.:.:.:.:.:.:.:.:.:.:.:.:.:.:.
query 3' GGAGUUGCUUCGCUAGAU 5'
query=miR5506, target=R03G_05925, score=0.5, range=660-677, stran
target 5' UCUCAACGAAGCGAUCUA 3'
.:.:.:.:.:.:.:.:.:.:.:.:.:.:.:.:.:.:.:.
query 3' GGAGUUGCUUCGCUAGAU 5'
query=miR5506, target=R03G_12961, score=0.5, range=993-1010, stra
target 5' UCUCAACGAAGCGAUCUA 3'

```

.:~::~  
query 3' GGAGUUGCUUCGCUAGAU 5'  
query=miR5506, target=R03G\_05927, score=0.5, range=660-677, stran  
target 5' UCUCAACGAAGCGAUCUA 3'  
.:~::~  
query 3' GGAGUUGCUUCGCUAGAU 5'  
query=miR5506, target=R03G\_09927, score=1, range=660-677, strand=  
target 5' CCUCAACGAGGCGAUCUA 3'  
.:~::~  
query 3' GGAGUUGCUUCGCUAGAU 5'  
query=miR5506, target=R03G\_09951, score=2.5, range=918-935, stran  
target 5' UCUGAAUGAAGCGAUCUA 3'  
.:: :~::~  
query 3' GGAGUUGCUUCGCUAGAU 5'  
query=miR5506, target=R03G\_00927, score=3, range=608-625, strand=  
target 5' UUUCAAGGAAGCGAUCUA 3'  
.~::~ :~::~  
query 3' GGAGUUGCUUCGCUAGAU 5'  
query=miR5506, target=R03G\_08754, score=3, range=5278-5295, stran  
target 5' GCUGAACGAAGUGAUCUA 3'  
:: :~::~  
query 3' GGAGUUGCUUCGCUAGAU 5'  
query=miR5506, target=R03G\_02524, score=3, range=244-260, strand=  
target 5' CCUC-ACGAAGCCAUCUA 3'  
~::~ :~::~ :~::~  
query 3' GGAGUUGCUUCGCUAGAU 5'  
query=miR5506, target=R03G\_07756, score=3.5, range=309-326, stran  
target 5' UCUUGACCAAGCGAUCUA 3'  
.~::~ :~::~  
query 3' GGAGUUGCUUCGCUAGAU 5'  
query=miR5506, target=R03G\_16652, score=4, range=181-199, strand=  
target 5' CUUCAACGAAGUGAUGCUG 3'  
.:~::~ :~::~  
query 3' GGAGUUGCUUCGCUA-GAU 5'  
query=miR5506, target=R03G\_13173, score=4, range=1310-1328, stran  
target 5' CCUCAGACGAAGUGAUCCA 3'  
~::~ :~::~ :~::~  
query 3' GGAGU-UGCUUCGCUAGAU 5'  
query=miR5506, target=R03G\_02307, score=4, range=696-713, strand=  
target 5' CCUGAACGAAGCGAUCGC 3'  
~::~ :~::~  
query 3' GGAGUUGCUUCGCUAGAU 5'  
query=miR5506, target=R03G\_07404, score=4, range=883-899, strand=  
target 5' CCUCAACGAAG-GAUUUC 3'  
.:~::~ :~::~

query 3' GGAGUUGCUUCGCUAGAU 5'  
query=miR5506, target=R03G\_12345, score=4, range=241-257, strand=  
target 5' CAUC-GCGAAGCGAUCUU 3'  
: :: .....

query 3' GGAGUUGCUUCGCUAGAU 5'  
query=miR5506, target=R03G\_12484, score=4, range=3550-3568, stran  
target 5' GCUCAACGAAGACGAUCUC 3'  
.....

query 3' GGAGUUGCUUC-GCUAGAU 5'  
query=miR5506, target=R03G\_02322, score=4, range=1604-1621, stran  
target 5' CCUCAGCAAAGUGAUCUA 3'  
.....

query 3' GGAGUUGCUUCGCUAGAU 5'  
query=miR5506, target=R03G\_11393, score=4, range=254-271, strand=  
target 5' CCUUGACGAAUUGAUCUA 3'  
.....

query 3' GGAGUUGCUUCGCUAGAU 5'  
query=miR5506, target=R03G\_09594, score=4, range=262-279, strand=  
target 5' CUUGAAUGGAGCGAUCUG 3'  
:.. ..

query 3' GGAGUUGCUUCGCUAGAU 5'  
query=miR5506, target=R03G\_15771, score=4, range=254-271, strand=  
target 5' CCUUGACGAAGCAAUCUU 3'  
.....

query 3' GGAGUUGCUUCGCUAGAU 5'  
query=miR9752, target=R03G\_02835, score=0, range=239-261, strand=  
target 5' AAAUCAUGGAACAGCAAGAAGCA 3'  
.....

query 3' UUUAGUACCUUGUCGUUCUUCGU 5'  
query=miR9752, target=R03G\_07109, score=0, range=239-261, strand=  
target 5' AAAUCAUGGAACAGCAAGAAGCA 3'  
.....

query 3' UUUAGUACCUUGUCGUUCUUCGU 5'  
query=miR9752, target=R03G\_07672, score=0, range=239-261, strand=  
target 5' AAAUCAUGGAACAGCAAGAAGCA 3'  
.....

query 3' UUUAGUACCUUGUCGUUCUUCGU 5'  
query=miR9752, target=R03G\_09934, score=0, range=239-261, strand=  
target 5' AAAUCAUGGAACAGCAAGAAGCA 3'  
.....

query 3' UUUAGUACCUUGUCGUUCUUCGU 5'  
query=miR9752, target=R03G\_09197, score=0, range=239-261, strand=  
target 5' AAAUCAUGGAACAGCAAGAAGCA 3'  
.....

query 3' UUUAGUACCUUGUCGUUCUUCGU 5'



```
target 5' AUGGACAUCCUCCUUUUUCUUGA 3'
::::::::::::::::::
query 3' UACCUGUAGGAGGAAAAGAACU 5'
query=miR5369, target=R03G_01718, score=0, range=639-660, strand=
target 5' AUGGACAUCCUCCUUUUUCUUGA 3'
::::::::::::::::::
query 3' UACCUGUAGGAGGAAAAGAACU 5'
query=miR5369, target=R03G_15869, score=0, range=639-660, strand=
target 5' AUGGACAUCCUCCUUUUUCUUGA 3'
::::::::::::::::::
query 3' UACCUGUAGGAGGAAAAGAACU 5'
query=miR5369, target=R03G_10560, score=0, range=639-660, strand=
target 5' AUGGACAUCCUCCUUUUUCUUGA 3'
::::::::::::::::::
query 3' UACCUGUAGGAGGAAAAGAACU 5'
query=miR5369, target=R03G_11275, score=0, range=639-660, strand=
target 5' AUGGACAUCCUCCUUUUUCUUGA 3'
::::::::::::::::::
query 3' UACCUGUAGGAGGAAAAGAACU 5'
query=miR5369, target=R03G_14704, score=0, range=639-660, strand=
target 5' AUGGACAUCCUCCUUUUUCUUGA 3'
::::::::::::::::::
query 3' UACCUGUAGGAGGAAAAGAACU 5'
query=miR5369, target=R03G_12979, score=0, range=639-660, strand=
target 5' AUGGACAUCCUCCUUUUUCUUGA 3'
::::::::::::::::::
query 3' UACCUGUAGGAGGAAAAGAACU 5'
query=miR5369, target=R03G_10555, score=0, range=639-660, strand=
target 5' AUGGACAUCCUCCUUUUUCUUGA 3'
::::::::::::::::::
query 3' UACCUGUAGGAGGAAAAGAACU 5'
query=miR5369, target=R03G_05280, score=0, range=639-660, strand=
target 5' AUGGACAUCCUCCUUUUUCUUGA 3'
::::::::::::::::::
query 3' UACCUGUAGGAGGAAAAGAACU 5'
query=miR5369, target=R03G_16686, score=0, range=639-660, strand=
target 5' AUGGACAUCCUCCUUUUUCUUGA 3'
::::::::::::::::::
query 3' UACCUGUAGGAGGAAAAGAACU 5'
query=miR5369, target=R03G_07305, score=0, range=639-660, strand=
target 5' AUGGACAUCCUCCUUUUUCUUGA 3'
::::::::::::::::::
query 3' UACCUGUAGGAGGAAAAGAACU 5'
query=miR5369, target=R03G_03103, score=0, range=639-660, strand=
target 5' AUGGACAUCCUCCUUUUUCUUGA 3'
```

query 3' UACCUAGGAGGAAAAGAACU 5'  
query=miR5369, target=R03G\_12087, score=0, range=639-660, strand=  
target 5' AUGGACAUCUCCUUUUUCUUGA 3'

query 3' UACCUAGGAGGAAAAGAACU 5'  
query=miR5369, target=R03G\_08612, score=0, range=639-660, strand=  
target 5' AUGGACAUCUCCUUUUUCUUGA 3'

query 3' UACCUAGGAGGAAAAGAACU 5'  
query=miR5369, target=R03G\_05630, score=0, range=639-660, strand=  
target 5' AUGGACAUCUCCUUUUUCUUGA 3'

query 3' UACCUAGGAGGAAAAGAACU 5'  
query=miR5369, target=R03G\_13450, score=0, range=594-615, strand=  
target 5' AUGGACAUCUCCUUUUUCUUGA 3'

query 3' UACCUAGGAGGAAAAGAACU 5'  
query=miR5369, target=R03G\_13859, score=0, range=264-285, strand=  
target 5' AUGGACAUCUCCUUUUUCUUGA 3'

query 3' UACCUAGGAGGAAAAGAACU 5'  
query=miR5369, target=R03G\_11970, score=0, range=639-660, strand=  
target 5' AUGGACAUCUCCUUUUUCUUGA 3'

query 3' UACCUAGGAGGAAAAGAACU 5'  
query=miR5369, target=R03G\_13152, score=0, range=639-660, strand=  
target 5' AUGGACAUCUCCUUUUUCUUGA 3'

query 3' UACCUAGGAGGAAAAGAACU 5'  
query=miR5369, target=R03G\_03988, score=0, range=639-660, strand=  
target 5' AUGGACAUCUCCUUUUUCUUGA 3'

query 3' UACCUAGGAGGAAAAGAACU 5'  
query=miR5369, target=R03G\_12951, score=0, range=639-660, strand=  
target 5' AUGGACAUCUCCUUUUUCUUGA 3'

query 3' UACCUAGGAGGAAAAGAACU 5'  
query=miR5369, target=R03G\_09376, score=0, range=639-660, strand=  
target 5' AUGGACAUCUCCUUUUUCUUGA 3'

query 3' UACCUAGGAGGAAAAGAACU 5'  
query=miR5369, target=R03G\_12194, score=0, range=639-660, strand=  
target 5' AUGGACAUCUCCUUUUUCUUGA 3'





query=miR1072, target=R03G\_01425, score=2, range=1389-1410, stran  
target 5' UCAAGUUCAGUAACAACAAUA 3'  
.:::::.....  
query 3' GGUUCGAGUUUAUUGUUGUUAU 5'  
query=miR1072, target=R03G\_13806, score=2, range=1389-1410, stran  
target 5' UCAAGUUCAGUAACAACAAUA 3'  
.:::::.....  
query 3' GGUUCGAGUUUAUUGUUGUUAU 5'  
query=miR1072, target=R03G\_16566, score=2, range=1389-1410, stran  
target 5' UCAAGUUCAGUAACAACAAUA 3'  
.:::::.....  
query 3' GGUUCGAGUUUAUUGUUGUUAU 5'  
query=miR1072, target=R03G\_03120, score=2, range=1389-1410, stran  
target 5' UCAAGUUCAGUAACAACAAUA 3'  
.:::::.....  
query 3' GGUUCGAGUUUAUUGUUGUUAU 5'  
query=miR1072, target=R03G\_14533, score=2, range=1194-1215, stran  
target 5' UCAAGUUCAGUAACAACAAUA 3'  
.:::::.....  
query 3' GGUUCGAGUUUAUUGUUGUUAU 5'  
query=miR1072, target=R03G\_03093, score=2.5, range=415-435, stran  
target 5' CGAAG-UCAAUAACAACAAUG 3'  
: ::: :.....  
query 3' GGUUCGAGUUUAUUGUUGUUAU 5'  
query=miR1072, target=R03G\_15852, score=3.5, range=582-604, stran  
target 5' UCAUAGUUCGAAUAACAGCAAUA 3'  
.:: :.....  
query 3' GGU-UCGAGUUUAUUGUUGUUAU 5'  
query=miR1072, target=R03G\_12258, score=4, range=540-562, strand=  
target 5' UCAACCUCAAAGUAACAACAAUG 3'  
.::: :.....  
query 3' GGUUCGAGUUU-AUUGUUGUUAU 5'  
query=miR1072, target=R03G\_14612, score=4, range=49-70, strand=1  
target 5' CCCGGCACAAUAACAUAUAUG 3'  
:: :. :.....  
query 3' GGUUCGAGUUUAUUGUUGUUAU 5'  
query=miR1072, target=R03G\_11195, score=4, range=1304-1324, stran  
target 5' UUAAGC-CAAUAACAAAAUA 3'  
.::::: :..... :  
query 3' GGUUCGAGUUUAUUGUUGUUAU 5'  
query=miR1072, target=R03G\_16217, score=4, range=462-483, strand=  
target 5' CUGUGAUCCAAUAACAACAAUA 3'  
... : : :.....  
query 3' GGUUCGAGUUUAUUGUUGUUAU 5'  
query=miR1072, target=R03G\_10289, score=4, range=948-968, strand=



target 5' ACAAUCAAGAUUACAACAUCA 3'  
:: :::::::::::::: :::::  
query 3' UGGUUAGUUCUGAUGUAGUAGU 5'  
query=miR9760, target=R03G\_03021, score=4, range=1882-1902, stran  
target 5' AUCAAUCCAGACUACAUC-UCG 3'  
: :::::::::::::: :::  
query 3' UGGUUAGUUCUGAUGUAGUAGU 5'  
query=miR9760, target=R03G\_12520, score=4, range=1440-1461, stran  
target 5' AGAGAUCAGGACUACAUCGUCA 3'  
: . :::::::::::::: :::  
query 3' UGGUUAGUUCUGAUGUAGUAGU 5'  
query=miR9760, target=R03G\_00797, score=4, range=1440-1461, stran  
target 5' AGAGAUCAGGACUACAUCGUCA 3'  
: . :::::::::::::: :::  
query 3' UGGUUAGUUCUGAUGUAGUAGU 5'  
query=miR398b-3p, target=R03G\_15529, score=4, range=586-605, stra  
target 5' AGUGGU-ACUUGAGAGCACAU 3'  
:: :: :::::::::::::: :::  
query 3' UCCCCACUGGACUCUUGUGUA 5'  
query=miR5260, target=R03G\_10729, score=0, range=781-802, strand=  
target 5' AUAGCCAGUCAUCAAUACAACA 3'  
: :::::::::::::: :::  
query 3' UAUCGGUCAGUAGUUAUGUUGU 5'  
query=miR5260, target=R03G\_05953, score=1.5, range=781-802, stran  
target 5' AUGGCCAGUCAUCAAUAUAACA 3'  
: :::::::::::::: :::  
query 3' UAUCGGUCAGUAGUUAUGUUGU 5'  
query=miR5260, target=R03G\_10780, score=1.5, range=781-802, stran  
target 5' AUGGCCAGUCAUCAAUAUAACA 3'  
: :::::::::::::: :::  
query 3' UAUCGGUCAGUAGUUAUGUUGU 5'  
query=miR5260, target=R03G\_10773, score=1.5, range=781-802, stran  
target 5' AUGGCCAGUCAUCAAUAUAACA 3'  
: :::::::::::::: :::  
query 3' UAUCGGUCAGUAGUUAUGUUGU 5'  
query=miR5260, target=R03G\_09542, score=1.5, range=781-802, stran  
target 5' AUGGCCAGUCAUCAAUAUAACA 3'  
: :::::::::::::: :::  
query 3' UAUCGGUCAGUAGUUAUGUUGU 5'  
query=miR5260, target=R03G\_17449, score=1.5, range=781-802, stran  
target 5' AUGGCCAGUCAUCAAUAUAACA 3'  
: :::::::::::::: :::  
query 3' UAUCGGUCAGUAGUUAUGUUGU 5'  
query=miR5260, target=R03G\_04210, score=1.5, range=781-802, stran  
target 5' AUGGCCAGUCAUCAAUAUAACA 3'

.....  
query 3' UAUCGGUCAGUAGUUAUGUUGU 5'  
query=miR5260, target=R03G\_07860, score=1.5, range=781-802, stran  
target 5' AUGGCCAGUCAUCAAUAACA 3'  
.....  
query 3' UAUCGGUCAGUAGUUAUGUUGU 5'  
query=miR5260, target=R03G\_14361, score=1.5, range=781-802, stran  
target 5' AUGGCCAGUCAUCAAUAACA 3'  
.....  
query 3' UAUCGGUCAGUAGUUAUGUUGU 5'  
query=miR5260, target=R03G\_05921, score=1.5, range=781-802, stran  
target 5' AUGGCCAGUCAUCAAUAACA 3'  
.....  
query 3' UAUCGGUCAGUAGUUAUGUUGU 5'  
query=miR5260, target=R03G\_05959, score=1.5, range=781-802, stran  
target 5' AUGGCCAGUCAUCAAUAACA 3'  
.....  
query 3' UAUCGGUCAGUAGUUAUGUUGU 5'  
query=miR5260, target=R03G\_14568, score=1.5, range=781-802, stran  
target 5' AUGGCCAGUCAUCAAUAACA 3'  
.....  
query 3' UAUCGGUCAGUAGUUAUGUUGU 5'  
query=miR5260, target=R03G\_11966, score=1.5, range=781-802, stran  
target 5' AUGGCCAGUCAUCAAUAACA 3'  
.....  
query 3' UAUCGGUCAGUAGUUAUGUUGU 5'  
query=miR5260, target=R03G\_09967, score=2, range=781-802, strand=  
target 5' AUGGCCAGUCAUCAAUAACG 3'  
.....  
query 3' UAUCGGUCAGUAGUUAUGUUGU 5'  
query=miR5260, target=R03G\_05267, score=2, range=781-802, strand=  
target 5' AUGGCCAGUCAUCAAUAACG 3'  
.....  
query 3' UAUCGGUCAGUAGUUAUGUUGU 5'  
query=miR5260, target=R03G\_00256, score=2, range=781-802, strand=  
target 5' AUGGCCAGUCAUCAAUAACG 3'  
.....  
query 3' UAUCGGUCAGUAGUUAUGUUGU 5'  
query=miR5260, target=R03G\_04207, score=2.5, range=781-802, stran  
target 5' AUGGCCAGUCAUCAAUGUAACA 3'  
.....  
query 3' UAUCGGUCAGUAGUUAUGUUGU 5'  
query=miR5260, target=R03G\_07124, score=2.5, range=781-802, stran  
target 5' AUGGCCAGUCAUCAAUGUAACA 3'  
.....

query 3' UAUCGGUCAGUAGUUAUGUUGU 5'  
query=miR5260, target=R03G\_17069, score=3.5, range=646-667, stran  
target 5' AUGGCCAGUCAUCAUAUAAAA 3'  
..... :  
query 3' UAUCGGUCAGUAGUUAUGUUGU 5'  
query=miR5260, target=R03G\_01942, score=3.5, range=778-799, stran  
target 5' AUGUCCAGUCAUCAUGUAACA 3'  
.. :.....  
query 3' UAUCGGUCAGUAGUUAUGUUGU 5'  
query=miR5260, target=R03G\_09945, score=3.5, range=505-526, stran  
target 5' AUGUCCAGUCAUCAUGUAACA 3'  
.. :.....  
query 3' UAUCGGUCAGUAGUUAUGUUGU 5'  
query=miR5260, target=R03G\_06545, score=4, range=698-719, strand=  
target 5' CUAGCCAAACAUAUAUACAACA 3'  
..... :.....  
query 3' UAUCGGUCAGUAGUUAUGUUGU 5'  
query=miR5260, target=R03G\_01220, score=4, range=3112-3132, stran  
target 5' AUA-CCAAUCAUCAUAACAUC 3'  
... : :.....  
query 3' UAUCGGUCAGUAGUUAUGUUGU 5'  
query=miR5260, target=R03G\_14415, score=4, range=571-591, strand=  
target 5' AUA-CCAGGUAUCAUAACAACC 3'  
... : : :.....  
query 3' UAUCGGUCAGUAGUUAUGUUGU 5'  
query=miR5260, target=R03G\_11450, score=4, range=1-23, strand=1  
target 5' AUGGCUACUACAUAUAACAACA 3'  
..... : :.....  
query 3' UAUCGGUCA-GUAGUUAUGUUGU 5'  
query=miR5260, target=R03G\_09194, score=4, range=781-802, strand=  
target 5' AUGUCCAGUCAUCAUGUAACG 3'  
.. :.....  
query 3' UAUCGGUCAGUAGUUAUGUUGU 5'  
query=miR169f-3p, target=R03G\_12009, score=0, range=2102-2122,  
strand=-1  
target 5' AGUAACCAAAGGAAGACAUCA 3'  
..... :.....  
query 3' UCAUUGGUUCCUUCUGUAGU 5'  
query=miR169f-3p, target=R03G\_16138, score=0, range=2102-2122,  
strand=-1  
target 5' AGUAACCAAAGGAAGACAUCA 3'  
..... :.....  
query 3' UCAUUGGUUCCUUCUGUAGU 5'  
query=miR169f-3p, target=R03G\_12072, score=0, range=2102-2122,  
strand=-1







strand=-1  
target 5' AAUAGACAAAGGAAGACAUCA 3'  
: ::. :::::::::::::::  
query 3' UCAUUGGUUUCCUUCUGUAGU 5'  
query=miR169f-3p, target=R03G\_07976, score=2.5, range=2099-2119,  
strand=-1  
target 5' AAUAGACAAAGGAAGACAUCA 3'  
: ::. :::::::::::::::  
query 3' UCAUUGGUUUCCUUCUGUAGU 5'  
query=miR169f-3p, target=R03G\_10725, score=2.5, range=2066-2086,  
strand=-1  
target 5' AAUAGACAAAGGAAGACAUCA 3'  
: ::. :::::::::::::::  
query 3' UCAUUGGUUUCCUUCUGUAGU 5'  
query=miR169f-3p, target=R03G\_06430, score=2.5, range=2066-2086,  
strand=-1  
target 5' AAUAGACAAAGGAAGACAUCA 3'  
: ::. :::::::::::::::  
query 3' UCAUUGGUUUCCUUCUGUAGU 5'  
query=miR169f-3p, target=R03G\_01309, score=2.5, range=2051-2071,  
strand=-1  
target 5' AAUAGACAAAGGAAGACAUCA 3'  
: ::. :::::::::::::::  
query 3' UCAUUGGUUUCCUUCUGUAGU 5'  
query=miR169f-3p, target=R03G\_01207, score=2.5, range=1919-1939,  
strand=-1  
target 5' AAUAGACAAAGGAAGACAUCA 3'  
: ::. :::::::::::::::  
query 3' UCAUUGGUUUCCUUCUGUAGU 5'  
query=miR169f-3p, target=R03G\_17441, score=2.5, range=1829-1849,  
strand=-1  
target 5' AAUAGACAAAGGAAGACAUCA 3'  
: ::. :::::::::::::::  
query 3' UCAUUGGUUUCCUUCUGUAGU 5'  
query=miR169f-3p, target=R03G\_13747, score=2.5, range=2102-2122,  
strand=-1  
target 5' AAUAGACAAAGGAAGACAUCA 3'  
: ::. :::::::::::::::  
query 3' UCAUUGGUUUCCUUCUGUAGU 5'  
query=miR169f-3p, target=R03G\_07294, score=2.5, range=1703-1723,  
strand=-1  
target 5' AAUAGACAAAGGAAGACAUCA 3'  
: ::. :::::::::::::::  
query 3' UCAUUGGUUUCCUUCUGUAGU 5'  
query=miR169f-3p, target=R03G\_01954, score=2.5, range=1052-1072,

strand=-1  
target 5' AAUAGACAAAGGAAGACAUCA 3'  
: ::. :::::::::::::::  
query 3' UCAUUGGUUUCCUUCUGUAGU 5'  
query=miR169f-3p, target=R03G\_03552, score=2.5, range=236-256,  
strand=-1  
target 5' AAUAGACAAAGGAAGACAUCA 3'  
: ::. :::::::::::::::  
query 3' UCAUUGGUUUCCUUCUGUAGU 5'  
query=miR169f-3p, target=R03G\_07128, score=2.5, range=620-640,  
strand=-1  
target 5' AAUAGACAAAGGAAGACAUCA 3'  
: ::. :::::::::::::::  
query 3' UCAUUGGUUUCCUUCUGUAGU 5'  
query=miR169f-3p, target=R03G\_06605, score=3, range=425-444, stra  
target 5' AGUAA-CAAAGGCAGACAUCA 3'  
: ::. :::::::::::::::  
query 3' UCAUUGGUUUCCUUCUGUAGU 5'  
query=miR169f-3p, target=R03G\_05462, score=4, range=973-994, stra  
target 5' CGUAACUGUAAGGGAGACAUCA 3'  
: ::. :::::::::::::::  
query 3' UCAUUGGU-UUCCUUCUGUAGU 5'  
query=miR169f-3p, target=R03G\_13316, score=4, range=199-220, stra  
target 5' AGUAGGUCAAAGGAAGAGAUCA 3'  
: ::. :::::::::::::::  
query 3' UCAU-UGGUUUCCUUCUGUAGU 5'  
query=miR169f-3p, target=R03G\_15960, score=4, range=573-592, stra  
target 5' AG-AACCAAAGGAAGAAUUA 3'  
: ::. :::::::::::::::  
query 3' UCAUUGGUUUCCUUCUGUAGU 5'  
query=miR169f-3p, target=R03G\_13160, score=4, range=1325-1344,  
strand=1  
target 5' AGUUACUAAAGGAAGA-AUCG 3'  
: ::. :::::::::::::::  
query 3' UCAUUGGUUUCCUUCUGUAGU 5'  
query=miR169f-3p, target=R03G\_06547, score=4, range=22-43, strand  
target 5' AGUAGUCAAGAGAAGAUUAUCA 3'  
: ::. :::::::::::::::  
query 3' UCAUUGGUUUC-CUUCUGUAGU 5'  
query=miR169f-3p, target=R03G\_03246, score=4, range=791-810, stra  
target 5' AGU-GUCAGAGGAAGGCAUCA 3'  
: ::. :::::::::::::::  
query 3' UCAUUGGUUUCCUUCUGUAGU 5'  
query=miR1857-3p, target=R03G\_10799, score=0, range=757-777, stra  
target 5' CUUGUUUUGUUGGAGCCAUGA 3'



query 3' UCUCUUUUUCGACCGGAACGUU 5'  
query=miR9558-3p, target=R03G\_14625, score=0, range=297-318, strand  
target 5' AGAGGAAAAGCUGGCCUUGCAA 3'  
.....  
query 3' UCUCUUUUUCGACCGGAACGUU 5'  
query=miR9558-3p, target=R03G\_07107, score=0, range=297-318, strand  
target 5' AGAGGAAAAGCUGGCCUUGCAA 3'  
.....  
query 3' UCUCUUUUUCGACCGGAACGUU 5'  
query=miR9558-3p, target=R03G\_05957, score=0, range=297-318, strand  
target 5' AGAGGAAAAGCUGGCCUUGCAA 3'  
.....  
query 3' UCUCUUUUUCGACCGGAACGUU 5'  
query=miR9558-3p, target=R03G\_13150, score=0, range=18-39, strand  
target 5' AGAGGAAAAGCUGGCCUUGCAA 3'  
.....  
query 3' UCUCUUUUUCGACCGGAACGUU 5'  
query=miR9558-3p, target=R03G\_04783, score=0, range=159-180, strand  
target 5' AGAGGAAAAGCUGGCCUUGCAA 3'  
.....  
query 3' UCUCUUUUUCGACCGGAACGUU 5'  
query=miR9558-3p, target=R03G\_03097, score=0, range=297-318, strand  
target 5' AGAGGAAAAGCUGGCCUUGCAA 3'  
.....  
query 3' UCUCUUUUUCGACCGGAACGUU 5'  
query=miR9558-3p, target=R03G\_01734, score=0, range=297-318, strand  
target 5' AGAGGAAAAGCUGGCCUUGCAA 3'  
.....  
query 3' UCUCUUUUUCGACCGGAACGUU 5'  
query=miR9558-3p, target=R03G\_10519, score=0, range=297-318, strand  
target 5' AGAGGAAAAGCUGGCCUUGCAA 3'  
.....  
query 3' UCUCUUUUUCGACCGGAACGUU 5'  
query=miR9558-3p, target=R03G\_04093, score=3, range=1311-1332,  
strand=1  
target 5' UGAGAAGGAGCUGGCCUUGCAA 3'  
::: ..  
query 3' UCUCUUUUUCGACCGGAACGUU 5'  
query=miR9558-3p, target=R03G\_02685, score=4, range=18-39, strand  
target 5' AGAGGAAAACAGGCCUUGCAA 3'  
..... : ..  
query 3' UCUCUUUUUCGACCGGAACGUU 5'  
query=miR2633, target=R03G\_06442, score=0, range=4775-4795, strand  
target 5' AGAAUCUGGUGCAAUGUCGA 3'  
.....

query 3' UCUUAGACCACGUUUACAGCU 5'  
query=miR2633, target=R03G\_02691, score=0, range=7607-7627, stran  
target 5' AGAAUCUGGUGCAAUGUCGA 3'  
.....  
query 3' UCUUAGACCACGUUUACAGCU 5'  
query=miR2633, target=R03G\_09965, score=0, range=4118-4138, stran  
target 5' AGAAUCUGGUGCAAUGUCGA 3'  
.....  
query 3' UCUUAGACCACGUUUACAGCU 5'  
query=miR2633, target=R03G\_13920, score=0, range=4118-4138, stran  
target 5' AGAAUCUGGUGCAAUGUCGA 3'  
.....  
query 3' UCUUAGACCACGUUUACAGCU 5'  
query=miR2633, target=R03G\_03547, score=0, range=4118-4138, stran  
target 5' AGAAUCUGGUGCAAUGUCGA 3'  
.....  
query 3' UCUUAGACCACGUUUACAGCU 5'  
query=miR2633, target=R03G\_13867, score=0, range=4034-4054, stran  
target 5' AGAAUCUGGUGCAAUGUCGA 3'  
.....  
query 3' UCUUAGACCACGUUUACAGCU 5'  
query=miR2633, target=R03G\_02959, score=0, range=4118-4138, stran  
target 5' AGAAUCUGGUGCAAUGUCGA 3'  
.....  
query 3' UCUUAGACCACGUUUACAGCU 5'  
query=miR2633, target=R03G\_15250, score=0, range=4073-4093, stran  
target 5' AGAAUCUGGUGCAAUGUCGA 3'  
.....  
query 3' UCUUAGACCACGUUUACAGCU 5'  
query=miR2633, target=R03G\_17371, score=0, range=4073-4093, stran  
target 5' AGAAUCUGGUGCAAUGUCGA 3'  
.....  
query 3' UCUUAGACCACGUUUACAGCU 5'  
query=miR2633, target=R03G\_06427, score=0, range=3710-3730, stran  
target 5' AGAAUCUGGUGCAAUGUCGA 3'  
.....  
query 3' UCUUAGACCACGUUUACAGCU 5'  
query=miR2633, target=R03G\_17326, score=0, range=3950-3970, stran  
target 5' AGAAUCUGGUGCAAUGUCGA 3'  
.....  
query 3' UCUUAGACCACGUUUACAGCU 5'  
query=miR2633, target=R03G\_06428, score=0, range=3212-3232, stran  
target 5' AGAAUCUGGUGCAAUGUCGA 3'  
.....  
query 3' UCUUAGACCACGUUUACAGCU 5'





query=miR394a-3p, target=R03G\_03967, score=3.5, range=1040-1059, strand=1  
target 5' UGAAGAAAGAGGUGACAACA 3'  
: : .....  
query 3' AAUGUUUUCUCUACUGUUGU 5'  
query=miR394a-3p, target=R03G\_12023, score=3.5, range=2-22, strand=1  
target 5' UGCAGAAAGAGAUGACGACA 3'  
: .:: .....  
query 3' AAUGU-UUUCUCUACUGUUGU 5'  
query=miR394a-3p, target=R03G\_04896, score=3.5, range=2208-2226, strand=1  
target 5' GUACAAGAGAGAUGA-AACA 3'  
: .....  
query 3' AAUGUUUUCUCUACUGUUGU 5'  
query=miR394a-3p, target=R03G\_13557, score=3.5, range=974-993, strand=-1  
target 5' UGGUAAGAGAGAUGAUAACA 3'  
: .....  
query 3' AAUGUUUUCUCUACUGUUGU 5'  
query=miR394a-3p, target=R03G\_16787, score=4, range=261-280, strand=1  
target 5' UUACACAGGAGAUGAUGACA 3'  
: .....  
query 3' AAUGUUUUCUCUACUGUUGU 5'  
query=miR394a-3p, target=R03G\_12626, score=4, range=720-739, strand=1  
target 5' UGACAAAAGUAGAUGACAACA 3'  
: .....  
query 3' AAUGUUUUCUCUACUGUUGU 5'  
query=miR394a-3p, target=R03G\_05768, score=4, range=135-154, strand=1  
target 5' UUACUAUAGGGAUGAUAACA 3'  
: .....  
query 3' AAUGUUUUCUCUACUGUUGU 5'  
query=miR394a-3p, target=R03G\_12883, score=4, range=176-194, strand=1  
target 5' ACACAAAAGAGAUGAC-ACA 3'  
: .....  
query 3' AAUGUUUUCUCUACUGUUGU 5'  
query=miR394a-3p, target=R03G\_06457, score=4, range=439-459, strand=1  
target 5' UUGCAAAGAGAUGAGCGACG 3'  
: .....  
query 3' AAUGUUUUCUCUACU-GUUGU 5'  
query=miR394a-3p, target=R03G\_03160, score=4, range=300-320, strand=1  
target 5' UUAUAGAUAGAGGUGACAACU 3'  
: .....  
query 3' AAUGUUU-UCUCUACUGUUGU 5'  
query=miR394a-3p, target=R03G\_10070, score=4, range=362-381, strand=1  
target 5' UGGCGUAAGGGAUGACAACA 3'



: .. :::::::::::::::  
query 3' AAUGUUUUCUCUACUGUUGU 5'  
query=miR394a-3p, target=R03G\_11485, score=4, range=362-381, stra  
target 5' UGGCGUAAGGGAUGACAACA 3'  
: .. :::::::::::::::  
query 3' AAUGUUUUCUCUACUGUUGU 5'  
query=miR394a-3p, target=R03G\_10359, score=4, range=362-381, stra  
target 5' UGGCGUAAGGGAUGACAACA 3'  
: .. :::::::::::::::  
query 3' AAUGUUUUCUCUACUGUUGU 5'  
query=miR394a-3p, target=R03G\_17191, score=4, range=362-381, stra  
target 5' UGGCGUAAGGGAUGACAACA 3'  
: .. :::::::::::::::  
query 3' AAUGUUUUCUCUACUGUUGU 5'  
query=miR394a-3p, target=R03G\_06230, score=4, range=13977-13995,  
strand=-1  
target 5' UUA-AAAGGAGAUGACCACA 3'  
::: ::::::::::::::: :::  
query 3' AAUGUUUUCUCUACUGUUGU 5'  
query=miR915, target=R03G\_09507, score=0, range=730-751, strand=1  
target 5' GACGACGUUGUCCUUAUUGCCA 3'  
:::::::::::::::::::::  
query 3' CUGCUGCAACAGGAAUAACGGU 5'  
query=miR915, target=R03G\_17033, score=0, range=676-697, strand=1  
target 5' GACGACGUUGUCCUUAUUGCCA 3'  
:::::::::::::::::::::  
query 3' CUGCUGCAACAGGAAUAACGGU 5'  
query=miR915, target=R03G\_12456, score=0, range=658-679, strand=1  
target 5' GACGACGUUGUCCUUAUUGCCA 3'  
:::::::::::::::::::::  
query 3' CUGCUGCAACAGGAAUAACGGU 5'  
query=miR915, target=R03G\_08181, score=0, range=433-454, strand=1  
target 5' GACGACGUUGUCCUUAUUGCCA 3'  
:::::::::::::::::::::  
query 3' CUGCUGCAACAGGAAUAACGGU 5'  
query=miR915, target=R03G\_03515, score=0, range=370-391, strand=1  
target 5' GACGACGUUGUCCUUAUUGCCA 3'  
:::::::::::::::::::::  
query 3' CUGCUGCAACAGGAAUAACGGU 5'  
query=miR915, target=R03G\_01653, score=0.5, range=598-619, strand  
target 5' GACGAUGUUGUCCUUAUUGCCA 3'  
:::::::::::::::::::::  
query 3' CUGCUGCAACAGGAAUAACGGU 5'  
query=miR915, target=R03G\_14836, score=2, range=1495-1516, strand  
target 5' GAUGACGUUGUCCUUAUUGCUG 3'

.....  
query 3' CUGCUGCAACAGGAAUAACGGU 5'  
query=miR915, target=R03G\_00484, score=3.5, range=45-66, strand=1  
target 5' GAUGACAUUGUCCUUAUUGCUU 3'  
.....  
query 3' CUGCUGCAACAGGAAUAACGGU 5'  
query=miR915, target=R03G\_00331, score=3.5, range=1284-1306, str  
target 5' CACGAAUGUUGUCCUUAUUGCCU 3'  
... ..  
query 3' CUGC-UGCAACAGGAAUAACGGU 5'  
query=miR414, target=R03G\_12063, score=0, range=1104-1125, strand  
target 5' UGACGAUAUGAAGAAGAUGGUA 3'  
.....  
query 3' ACUGCUAUACUUCUUCUACCAU 5'  
query=miR414, target=R03G\_04206, score=0, range=657-678, strand=1  
target 5' UGACGAUAUGAAGAAGAUGGUA 3'  
.....  
query 3' ACUGCUAUACUUCUUCUACCAU 5'  
query=miR414, target=R03G\_07712, score=0, range=108-129, strand=1  
target 5' UGACGAUAUGAAGAAGAUGGUA 3'  
.....  
query 3' ACUGCUAUACUUCUUCUACCAU 5'  
query=miR414, target=R03G\_12187, score=0.5, range=1608-1629, stra  
target 5' UGAUGAUUGAAGAAGAUGGUA 3'  
.....  
query 3' ACUGCUAUACUUCUUCUACCAU 5'  
query=miR414, target=R03G\_11395, score=3, range=108-129, strand=1  
target 5' UGAAGAUUGAAGACGAUGGUA 3'  
... ..  
query 3' ACUGCUAUACUUCUUCUACCAU 5'  
query=miR414, target=R03G\_02287, score=3.5, range=1829-1849, stra  
target 5' UUUUGAU-UGAAGAAGAUGGUA 3'  
: .: ..  
query 3' ACUGCUAUACUUCUUCUACCAU 5'  
query=miR414, target=R03G\_14053, score=3.5, range=922-944, strand  
target 5' UGCUGAUUUGAAGAGGAUGGUA 3'  
.. .: ..  
query 3' ACUGCUAU-ACUUCUUCUACCAU 5'  
query=miR414, target=R03G\_12494, score=4, range=894-916, strand=1  
target 5' UGAUGAAGAUGAAGGAGAUGGUG 3'  
.....  
query 3' ACUGC-UAUACUUCUUCUACCAU 5'  
query=miR414, target=R03G\_01516, score=4, range=2539-2560, strand  
target 5' CGACGAAAAGAGGAAGAUGGUA 3'  
.....

query 3' ACUGCUAUACUUCUUCUACCAU 5'  
query=miR414, target=R03G\_15731, score=4, range=39-60, strand=1  
target 5' UGACGAGAUGAAAAAGAUGGUU 3'  
.....  
query 3' ACUGCUAUACUUCUUCUACCAU 5'  
query=miR414, target=R03G\_03476, score=4, range=66-87, strand=1  
target 5' UGUUGAAAAGAAGAAGAUGGUG 3'  
.. : : : ..  
query 3' ACUGCUAUACUUCUUCUACCAU 5'  
query=miR414, target=R03G\_02379, score=4, range=3894-3916, strand  
target 5' UGACGAUGUAGAAGAAGAUGAUG 3'  
..... :  
query 3' ACUGCUAUA-CUUCUUCUACCAU 5'  
query=miR414, target=R03G\_07465, score=4, range=158-180, strand=-  
target 5' UGGAGUAUGAGAAGAAGAUGGUA 3'  
.. : : : ..  
query 3' ACUGC-UAUACUUCUUCUACCAU 5'  
query=miR8043, target=R03G\_16392, score=0, range=381-402, strand=  
target 5' GGCCAAAUCCAUGUAUGAUCA 3'  
.....  
query 3' CCGGUUUAGGUAUCAUACUAGU 5'  
query=miR8043, target=R03G\_09180, score=1, range=1398-1419, stran  
target 5' GGCCAAAUCCAUGUAUGAUUA 3'  
.....  
query 3' CCGGUUUAGGUAUCAUACUAGU 5'  
query=miR8043, target=R03G\_16812, score=1, range=1398-1419, stran  
target 5' GGCCAAAUCCAUGUAUGAUUA 3'  
.....  
query 3' CCGGUUUAGGUAUCAUACUAGU 5'  
query=miR8043, target=R03G\_09189, score=1, range=1398-1419, stran  
target 5' GGCCAAAUCCAUGUAUGAUUA 3'  
.....  
query 3' CCGGUUUAGGUAUCAUACUAGU 5'  
query=miR8043, target=R03G\_14798, score=1, range=1398-1419, stran  
target 5' GGCCAAAUCCAUGUAUGAUUA 3'  
.....  
query 3' CCGGUUUAGGUAUCAUACUAGU 5'  
query=miR8043, target=R03G\_14791, score=1, range=1398-1419, stran  
target 5' GGCCAAAUCCAUGUAUGAUUA 3'  
.....  
query 3' CCGGUUUAGGUAUCAUACUAGU 5'  
query=miR8043, target=R03G\_17260, score=1, range=1266-1287, stran  
target 5' GGCCAAAUCCAUGUAUGAUUA 3'  
.....  
query 3' CCGGUUUAGGUAUCAUACUAGU 5'

query=miR8043, target=R03G\_15270, score=1, range=447-468, strand=  
target 5' GGCCAAAUCCAUAUGAUUA 3'  
:~::~  
query 3' CCGGUUUAGGUAUCAUACUAGU 5'  
query=miR8043, target=R03G\_06734, score=1, range=702-723, strand=  
target 5' GGCCAAAUCCAUAUGAUUA 3'  
:~::~  
query 3' CCGGUUUAGGUAUCAUACUAGU 5'  
query=miR169d, target=R03G\_02691, score=0, range=335-356, strand=  
target 5' CCGGUAUUCUCAUCCUUGC UAA 3'  
:~::~  
query 3' GGCCA UUAGAGUAGGAACGAUU 5'  
query=miR169d, target=R03G\_17318, score=0, range=1802-1823, stran  
target 5' CCGGUAUUCUCAUCCUUGC UAA 3'  
:~::~  
query 3' GGCCA UUAGAGUAGGAACGAUU 5'  
query=miR169d, target=R03G\_04118, score=0, range=1802-1823, stran  
target 5' CCGGUAUUCUCAUCCUUGC UAA 3'  
:~::~  
query 3' GGCCA UUAGAGUAGGAACGAUU 5'  
query=miR169d, target=R03G\_16143, score=0, range=1799-1820, stran  
target 5' CCGGUAUUCUCAUCCUUGC UAA 3'  
:~::~  
query 3' GGCCA UUAGAGUAGGAACGAUU 5'  
query=miR169d, target=R03G\_17274, score=0, range=1802-1823, stran  
target 5' CCGGUAUUCUCAUCCUUGC UAA 3'  
:~::~  
query 3' GGCCA UUAGAGUAGGAACGAUU 5'  
query=miR169d, target=R03G\_12533, score=0, range=1142-1163, stran  
target 5' CCGGUAUUCUCAUCCUUGC UAA 3'  
:~::~  
query 3' GGCCA UUAGAGUAGGAACGAUU 5'  
query=miR169d, target=R03G\_17329, score=0, range=1139-1160, stran  
target 5' CCGGUAUUCUCAUCCUUGC UAA 3'  
:~::~  
query 3' GGCCA UUAGAGUAGGAACGAUU 5'  
query=miR169d, target=R03G\_07028, score=0, range=872-893, strand=  
target 5' CCGGUAUUCUCAUCCUUGC UAA 3'  
:~::~  
query 3' GGCCA UUAGAGUAGGAACGAUU 5'  
query=miR169d, target=R03G\_15135, score=0, range=1802-1823, stran  
target 5' CCGGUAUUCUCAUCCUUGC UAA 3'  
:~::~  
query 3' GGCCA UUAGAGUAGGAACGAUU 5'  
query=miR169d, target=R03G\_17384, score=0, range=1802-1823, stran

```

target 5' CCGGUAUUCUCAUCCUUGC UAA 3'
.....
query 3' GGCCAUUAGAGUAGGAACGAUU 5'
query=miR169d, target=R03G_06727, score=0, range=1940-1961, stran
target 5' CCGGUAUUCUCAUCCUUGC UAA 3'
.....
query 3' GGCCAUUAGAGUAGGAACGAUU 5'
query=miR169d, target=R03G_02999, score=4, range=3362-3383, stran
target 5' UCUGUAAAUCAUCCUUGC UAG 3'
.: :. :. :. :. :. :. :. :.
query 3' GGCCAUUAGAGUAGGAACGAUU 5'
query=miR5499, target=R03G_07972, score=0, range=428-447, strand=
target 5' UUCAACGAUCUUCUGUA 3'
.....
query 3' AAGGUUUGCUAGAAGGACAU 5'
query=miR5499, target=R03G_07991, score=0, range=428-447, strand=
target 5' UUCAACGAUCUUCUGUA 3'
.....
query 3' AAGGUUUGCUAGAAGGACAU 5'
query=miR5499, target=R03G_16015, score=3, range=950-969, strand=
target 5' UUUCAAGUGGUCUUCUGUA 3'
.....
query 3' AAGGUUUGCUAGAAGGACAU 5'
query=miR5499, target=R03G_11387, score=3, range=2596-2615, stran
target 5' UUACAAAUGAUCUUCUUGUA 3'
.: :. :. :. :. :. :. :. :.
query 3' AAGGUUUGCUAGAAGGACAU 5'
query=miR5499, target=R03G_12682, score=3.5, range=410-429, stran
target 5' CAUAAACGAUCUUCUGUA 3'
.....
query 3' AAGGUUUGCUAGAAGGACAU 5'
query=miR5499, target=R03G_08132, score=4, range=161-179, strand=
target 5' UUUCCCAACGAUUUUCU-UA 3'
.: :. :. :. :. :. :. :. :.
query 3' AAGGUUUGCUAGAAGGACAU 5'
query=miR5679, target=R03G_16392, score=0, range=942-961, strand=
target 5' UCUAACUUCUUCUGCACCAA 3'
.....
query 3' AGAUUGAAGAAGACGUGGUU 5'
query=miR5679, target=R03G_08382, score=1.5, range=1059-1078, str
target 5' UCCAGCUUCUUCUGCACCAA 3'
.: :. :. :. :. :. :. :. :.
query 3' AGAUUGAAGAAGACGUGGUU 5'
query=miR5679, target=R03G_17260, score=2, range=1972-1991, stran
target 5' UCCAACUUCUUUUGCACCAA 3'

```

```
:: :::::::::::::::::::::
query 3' AGAUUGAAGAAGACGUGGUU 5'
query=miR5679, target=R03G_15046, score=2.5, range=81-100, strand
target 5' UCUUCCUUCUUCUGCACCAG 3'
::: :::::::::::::::::::::
query 3' AGAUUGAAGAAGACGUGGUU 5'
query=miR5679, target=R03G_15766, score=3, range=1717-1735, stran
target 5' UCU-ACUUCUUCUGUACUAA 3'
::: :::::::::::::::::::::
query 3' AGAUUGAAGAAGACGUGGUU 5'
query=miR5679, target=R03G_15382, score=3.5, range=563-582, stran
target 5' UUUGGGUUCUUCUGCACCGA 3'
:::.. :::::::::::::::::::::
query 3' AGAUUGAAGAAGACGUGGUU 5'
query=miR5679, target=R03G_16662, score=3.5, range=344-363, stran
target 5' UUUGGGUUCUUCUGCACCGA 3'
:::.. :::::::::::::::::::::
query 3' AGAUUGAAGAAGACGUGGUU 5'
query=miR5679, target=R03G_00611, score=3.5, range=4253-4272,
strand=-1
target 5' UUGAACUUCUUCUGGACCAA 3'
::: :::::::::::::::::::::
query 3' AGAUUGAAGAAGACGUGGUU 5'
query=miR5679, target=R03G_12393, score=3.5, range=167-186, stran
target 5' UCUGCCUUCUUCUUCACCAA 3'
:::.. :::::::::::::::::::::
query 3' AGAUUGAAGAAGACGUGGUU 5'
query=miR5679, target=R03G_01808, score=3.5, range=4676-4695,
strand=-1
target 5' UUCAGCAUCUUCUGCACCAG 3'
::: ::: :::::::::::::::::::::
query 3' AGAUUGAAGAAGACGUGGUU 5'
query=miR5679, target=R03G_06040, score=3.5, range=377-396, stran
target 5' GCUGUCUUCUUCUGCACCAC 3'
::: :::::::::::::::::::::
query 3' AGAUUGAAGAAGACGUGGUU 5'
query=miR5679, target=R03G_04287, score=4, range=489-508, strand=
target 5' UCUGAGUUAUUCUGCACCAG 3'
:::..: ::: :::::::::::::::::::::
query 3' AGAUUGAAGAAGACGUGGUU 5'
query=miR5679, target=R03G_10076, score=4, range=634-652, strand=
target 5' UCU-ACUUCUUCUGCCUCAA 3'
:::~: :::::::::::::::::::::
query 3' AGAUUGAAGAAGACGUGGUU 5'
query=miR5679, target=R03G_00105, score=4, range=6733-6751, stran
```

target 5' UCCAA-UUCUUCUGCAUCAC 3'  
:: :: :::::::::::::::  
query 3' AGAUUGAAGAAGACGUGGUU 5'  
query=miR5679, target=R03G\_04826, score=4, range=502-521, strand=  
target 5' UUUAAUUUUUUGUGCACCAA 3'  
:.....: :::::::::::  
query 3' AGAUUGAAGAAGACGUGGUU 5'  
query=miR5679, target=R03G\_12932, score=4, range=1367-1386, stran  
target 5' GUUACCUUCUUCUGUACCAG 3'  
.::: :::::::::::::::  
query 3' AGAUUGAAGAAGACGUGGUU 5'  
query=miR5679, target=R03G\_00509, score=4, range=1631-1650, stran  
target 5' UCUAAAUUUUUCUGCACCCA 3'  
:.....: :::::::::::::::  
query 3' AGAUUGAAGAAGACGUGGUU 5'  
query=miR5679, target=R03G\_12643, score=4, range=239-258, strand=  
target 5' UCUACCUUUUUCUUCACCAA 3'  
:.....: :::::::::::::::  
query 3' AGAUUGAAGAAGACGUGGUU 5'  
query=miR5679, target=R03G\_05177, score=4, range=377-395, strand=  
target 5' UUUGA-UUCUUCUGCGCUAA 3'  
:.....: :::::::::::::::  
query 3' AGAUUGAAGAAGACGUGGUU 5'  
query=miR5679, target=R03G\_07463, score=4, range=4283-4302, stran  
target 5' UCGACCUUCUUCUGUAUCAA 3'  
:: : :::::::::::::::  
query 3' AGAUUGAAGAAGACGUGGUU 5'  
query=miR5679, target=R03G\_01798, score=4, range=2320-2339, stran  
target 5' UCUAUUUCUUUUGCAUCAA 3'  
:.....: :::::::::::::::  
query 3' AGAUUGAAGAAGACGUGGUU 5'  
query=miR5679, target=R03G\_16149, score=4, range=161-179, strand=  
target 5' ACUAA-UUCUUCUGCAUCAA 3'  
:.....: :::::::::::::::  
query 3' AGAUUGAAGAAGACGUGGUU 5'  
query=miR5679, target=R03G\_02261, score=4, range=590-608, strand=  
target 5' UCU-ACUUCUUCUGUAGCAA 3'  
:.....: :::::::::::::::  
query 3' AGAUUGAAGAAGACGUGGUU 5'  
query=miR5679, target=R03G\_15954, score=4, range=329-349, strand=  
target 5' GCUCAUCUUCUUCUGCAUCAA 3'  
:: : :::::::::::::::  
query 3' AGA-UUGAAGAAGACGUGGUU 5'  
query=miR5679, target=R03G\_13384, score=4, range=1193-1211, stran  
target 5' UC-AGCUUCUUCAGCACCCAG 3'

:: :::::::::: :::::  
query 3' AGAUUGAAGAAGACGUGGUU 5'  
query=miR5679, target=R03G\_06572, score=4, range=179-197, strand=  
target 5' ACUAA-UUCUUCUACACCAA 3'  
:::: :::::::::: :::::  
query 3' AGAUUGAAGAAGACGUGGUU 5'  
query=miR5679, target=R03G\_15432, score=4, range=305-323, strand=  
target 5' UCU-UCUUCUUCUGCACUAC 3'  
::: :::::::::::::::  
query 3' AGAUUGAAGAAGACGUGGUU 5'  
query=miR5679, target=R03G\_11023, score=4, range=1487-1505, stran  
target 5' UCU-UCUUCUUCUUCACCAA 3'  
::: :::::::::::::::  
query 3' AGAUUGAAGAAGACGUGGUU 5'  
query=miR161.1, target=R03G\_13154, score=0, range=378-399, strand  
target 5' ACCCCUUGAUGAGCCACUUUCA 3'  
:::::::::::::::::::::  
query 3' UGGGGAACUACUCGGUGAAAGU 5'  
query=miR161.1, target=R03G\_02823, score=0, range=378-399, strand  
target 5' ACCCCUUGAUGAGCCACUUUCA 3'  
:::::::::::::::::::::  
query 3' UGGGGAACUACUCGGUGAAAGU 5'  
query=miR161.1, target=R03G\_03622, score=2, range=201-222, strand  
target 5' ACCCCUUGAUGAACCACUUUCA 3'  
:::::::::::::::::::::  
query 3' UGGGGAACUACUCGGUGAAAGU 5'  
query=miR161.1, target=R03G\_12187, score=2, range=378-399, strand  
target 5' ACCCCUUGAUGAACCACUUUCA 3'  
:::::::::::::::::::::  
query 3' UGGGGAACUACUCGGUGAAAGU 5'  
query=miR161.1, target=R03G\_14986, score=2, range=378-399, strand  
target 5' ACCCCUUGAUGAACCACUUUCA 3'  
:::::::::::::::::::::  
query 3' UGGGGAACUACUCGGUGAAAGU 5'  
query=miR161.1, target=R03G\_07714, score=2, range=201-222, strand  
target 5' ACCCCUUGAUGAACCACUUUCA 3'  
:::::::::::::::::::::  
query 3' UGGGGAACUACUCGGUGAAAGU 5'  
query=miR161.1, target=R03G\_05349, score=2, range=378-399, strand  
target 5' ACCCCUUGAUGAACCACUUUCA 3'  
:::::::::::::::::::::  
query 3' UGGGGAACUACUCGGUGAAAGU 5'  
query=miR161.1, target=R03G\_04693, score=2, range=378-399, strand  
target 5' ACCCCUUGAUGAACCACUUUCA 3'  
:::::::::::::::::::::



query 3' UGGGGAACUACUCGGUGAAAGU 5'  
query=miR161.1, target=R03G\_03610, score=2, range=356-377, strand  
target 5' ACCCCUUGAUGAACACUUUCA 3'  
.....  
query 3' UGGGGAACUACUCGGUGAAAGU 5'  
query=miR161.1, target=R03G\_04209, score=2.5, range=306-327, str  
target 5' GCCCCUUGAUGAACACUUUCA 3'  
.....  
query 3' UGGGGAACUACUCGGUGAAAGU 5'  
query=miR161.1, target=R03G\_03658, score=4, range=128-150, strand  
target 5' UCUCUUGGUUGAGCCACUUUCU 3'  
.....  
query 3' UGGGGAACU-ACUCGGUGAAAGU 5'  
query=miR161.1, target=R03G\_11575, score=4, range=689-710, strand  
target 5' AUACCUUGGUGAGCCACUAUCA 3'  
.. ..  
query 3' UGGGGAACUACUCGGUGAAAGU 5'  
query=miR3631a-3p, target=R03G\_03783, score=0, range=268-289, str  
target 5' UUGUUAAGACAUAUCCAAUUA 3'  
.....  
query 3' AACAAUUCUGUAUUAGGUUAAU 5'  
query=miR3631a-3p, target=R03G\_13292, score=0, range=268-289, str  
target 5' UUGUUAAGACAUAUCCAAUUA 3'  
.....  
query 3' AACAAUUCUGUAUUAGGUUAAU 5'  
query=miR3631a-3p, target=R03G\_17309, score=0, range=268-289, str  
target 5' UUGUUAAGACAUAUCCAAUUA 3'  
.....  
query 3' AACAAUUCUGUAUUAGGUUAAU 5'  
query=miR3631a-3p, target=R03G\_17372, score=0, range=268-289, str  
target 5' UUGUUAAGACAUAUCCAAUUA 3'  
.....  
query 3' AACAAUUCUGUAUUAGGUUAAU 5'  
query=miR3631a-3p, target=R03G\_06411, score=0, range=268-289, str  
target 5' UUGUUAAGACAUAUCCAAUUA 3'  
.....  
query 3' AACAAUUCUGUAUUAGGUUAAU 5'  
query=miR3631a-3p, target=R03G\_17311, score=0, range=268-289, str  
target 5' UUGUUAAGACAUAUCCAAUUA 3'  
.....  
query 3' AACAAUUCUGUAUUAGGUUAAU 5'  
query=miR3631a-3p, target=R03G\_14785, score=0, range=268-289, str  
target 5' UUGUUAAGACAUAUCCAAUUA 3'  
.....  
query 3' AACAAUUCUGUAUUAGGUUAAU 5'

query=miR3631a-3p, target=R03G\_15743, score=2, range=268-289, str  
target 5' CUAUUAAGACAUAUCCAUAUA 3'  
: ::::::::::::::::::::  
query 3' AACAAUUCUGUAUUAGGUUAAU 5'  
query=miR3631a-3p, target=R03G\_04902, score=3, range=158-180, str  
target 5' UUGUUAAGACCAGAAUCCAUAUA 3'  
::::::::: :: ::::::::::::::::::::  
query 3' AACAAUUCU-GUAUUAGGUUAAU 5'  
query=miR7697-3p, target=R03G\_15176, score=3.5, range=89-108, str  
target 5' UAUCUGAUU-UUGUUAUUGGA 3'  
:::::..... ::::::::::::::::::::  
query 3' AUAGGCUAGUAACAAUAACCU 5'  
query=miR7697-3p, target=R03G\_11623, score=4, range=1154-1173,  
strand=1  
target 5' CAUGCGAU-AUUGUUAUUGGA 3'  
:: :::: ::::::::::::::::::::  
query 3' AUAGGCUAGUAACAAUAACCU 5'  
query=miR7697-3p, target=R03G\_16177, score=4, range=813-833, stra  
target 5' CAUUUGAUCAUUGUUAUUGGA 3'  
..... ::::::::::::::::::::  
query 3' AUAGGCUAGUAACAAUAACCU 5'  
query=miR164b-3p, target=R03G\_16322, score=3, range=984-1001,  
strand=-1  
target 5' GGAGGAGAAGCUGGGGGC 3'  
:: ::::::::::::::::::::  
query 3' CCACCUCUUCGACCCGCG 5'  
query=miR164b-3p, target=R03G\_14084, score=3, range=1524-1540,  
strand=-1  
target 5' CGU-GAGAAGUUGGGCGC 3'  
:: ::::::::::::::::::::  
query 3' CCACCUCUUCGACCCGCG 5'  
query=miR164b-3p, target=R03G\_08058, score=3.5, range=1028-1046,  
strand=-1  
target 5' GGUGUGAGAAGCUGGGCUU 3'  
:::: :::::::::::::::::::: .  
query 3' CCAC-CUCUUCGACCCGCG 5'  
query=miR164b-3p, target=R03G\_00245, score=4, range=190-208, stra  
target 5' GUUGGAGGAGCUGGGGGCGC 3'  
: ::::::::::::::::::::  
query 3' CCACCUCUUCGA-CCCGCG 5'  
query=miR164b-3p, target=R03G\_07739, score=4, range=6-24, strand=  
target 5' GUUGGAGGAGCUGGAGCGC 3'  
: ::::::::::::::::::::  
query 3' CCACCUCUUCGACC-CGCG 5'  
query=miR164b-3p, target=R03G\_17278, score=4, range=190-208, stra





query=miR1211-3p, target=R03G\_13664, score=0.5, range=1022-1040,  
strand=1  
target 5' GUAUGAAGAGACGGUGUGA 3'  
:.....  
query 3' CGUACUUCUCUGCCACACU 5'  
query=miR1211-3p, target=R03G\_14722, score=0.5, range=1022-1040,  
strand=1  
target 5' GUAUGAAGAGACGGUGUGA 3'  
:.....  
query 3' CGUACUUCUCUGCCACACU 5'  
query=miR1211-3p, target=R03G\_08906, score=0.5, range=1022-1040,  
strand=1  
target 5' GUAUGAAGAGACGGUGUGA 3'  
:.....  
query 3' CGUACUUCUCUGCCACACU 5'  
query=miR1211-3p, target=R03G\_05303, score=0.5, range=1022-1040,  
strand=1  
target 5' GUAUGAAGAGACGGUGUGA 3'  
:.....  
query 3' CGUACUUCUCUGCCACACU 5'  
query=miR1211-3p, target=R03G\_02354, score=0.5, range=1022-1040,  
strand=1  
target 5' GUAUGAAGAGACGGUGUGA 3'  
:.....  
query 3' CGUACUUCUCUGCCACACU 5'  
query=miR1211-3p, target=R03G\_05194, score=0.5, range=1022-1040,  
strand=1  
target 5' GUAUGAAGAGACGGUGUGA 3'  
:.....  
query 3' CGUACUUCUCUGCCACACU 5'  
query=miR1211-3p, target=R03G\_13672, score=0.5, range=1022-1040,  
strand=1  
target 5' GUAUGAAGAGACGGUGUGA 3'  
:.....  
query 3' CGUACUUCUCUGCCACACU 5'  
query=miR1211-3p, target=R03G\_12139, score=0.5, range=395-413,  
strand=1  
target 5' GUAUGAAGAGACGGUGUGA 3'  
:.....  
query 3' CGUACUUCUCUGCCACACU 5'  
query=miR1211-3p, target=R03G\_11486, score=0.5, range=731-749,  
strand=1  
target 5' GUAUGAAGAGACGGUGUGA 3'  
:.....  
query 3' CGUACUUCUCUGCCACACU 5'

query=miR1211-3p, target=R03G\_09419, score=0.5, range=842-860,  
strand=1  
target 5' GUAUGAAGAGACGGUGUGA 3'  
:.....  
query 3' CGUACUUCUCUGCCACACU 5'  
query=miR1211-3p, target=R03G\_05616, score=0.5, range=311-329,  
strand=1  
target 5' GUAUGAAGAGACGGUGUGA 3'  
:.....  
query 3' CGUACUUCUCUGCCACACU 5'  
query=miR1211-3p, target=R03G\_11567, score=0.5, range=1679-1697,  
strand=1  
target 5' GUAUGAAGAGACGGUGUGA 3'  
:.....  
query 3' CGUACUUCUCUGCCACACU 5'  
query=miR1211-3p, target=R03G\_10644, score=0.5, range=407-425,  
strand=1  
target 5' GUAUGAAGAGACGGUGUGA 3'  
:.....  
query 3' CGUACUUCUCUGCCACACU 5'  
query=miR1211-3p, target=R03G\_05603, score=0.5, range=281-299,  
strand=1  
target 5' GUAUGAAGAGACGGUGUGA 3'  
:.....  
query 3' CGUACUUCUCUGCCACACU 5'  
query=miR1211-3p, target=R03G\_01923, score=1.5, range=971-989,  
strand=1  
target 5' GUAUGAAGAGAUGGUGUGA 3'  
:.....  
query 3' CGUACUUCUCUGCCACACU 5'  
query=miR1211-3p, target=R03G\_11757, score=2, range=407-425, stra  
target 5' GCAUGAAGAGACGAUGUGA 3'  
:..... :  
query 3' CGUACUUCUCUGCCACACU 5'  
query=miR1211-3p, target=R03G\_11765, score=2, range=407-425, stra  
target 5' GCAUGAAGAGACGAUGUGA 3'  
:..... :  
query 3' CGUACUUCUCUGCCACACU 5'  
query=miR1211-3p, target=R03G\_05535, score=2.5, range=407-425,  
strand=1  
target 5' GUAUGAAGAGACGGCGUGA 3'  
:..... :  
query 3' CGUACUUCUCUGCCACACU 5'  
query=miR1211-3p, target=R03G\_04104, score=2.5, range=719-737,  
strand=1



```

target 5' GCAUGAAAAGACGAUGUGA 3'
: : : : : : : : : : : : : : : :
query 3' CGUACUUCUCUGCCACACU 5'
query=miR1211-3p, target=R03G_15009, score=4, range=602-619, str
target 5' GCAGGAGGAGACGGUG-GA 3'
: : : : : : : : : : : : : : : :
query 3' CGUACUUCUCUGCCACACU 5'
query=miR1211-3p, target=R03G_14020, score=4, range=2117-2134,
strand=-1
target 5' GGAU-AGGAGGCGGUGUGA 3'
: : : : : : : : : : : : : : : :
query 3' CGUACUUCUCUGCCACACU 5'
query=miR5246, target=R03G_04671, score=0, range=727-744, strand=
target 5' AAGUCAAAAGCUGUCUCAA 3'
: : : : : : : : : : : : : : : :
query 3' UUCAGUUUCGACAGAGUU 5'
query=miR5246, target=R03G_07029, score=0, range=226-243, strand=
target 5' AAGUCAAAAGCUGUCUCAA 3'
: : : : : : : : : : : : : : : :
query 3' UUCAGUUUCGACAGAGUU 5'
query=miR5246, target=R03G_13139, score=0, range=226-243, strand=
target 5' AAGUCAAAAGCUGUCUCAA 3'
: : : : : : : : : : : : : : : :
query 3' UUCAGUUUCGACAGAGUU 5'
query=miR5246, target=R03G_10036, score=0, range=226-243, strand=
target 5' AAGUCAAAAGCUGUCUCAA 3'
: : : : : : : : : : : : : : : :
query 3' UUCAGUUUCGACAGAGUU 5'
query=miR5246, target=R03G_17463, score=0, range=226-243, strand=
target 5' AAGUCAAAAGCUGUCUCAA 3'
: : : : : : : : : : : : : : : :
query 3' UUCAGUUUCGACAGAGUU 5'
query=miR5246, target=R03G_09487, score=0, range=226-243, strand=
target 5' AAGUCAAAAGCUGUCUCAA 3'
: : : : : : : : : : : : : : : :
query 3' UUCAGUUUCGACAGAGUU 5'
query=miR5246, target=R03G_05933, score=0, range=226-243, strand=
target 5' AAGUCAAAAGCUGUCUCAA 3'
: : : : : : : : : : : : : : : :
query 3' UUCAGUUUCGACAGAGUU 5'
query=miR5246, target=R03G_09485, score=0, range=226-243, strand=
target 5' AAGUCAAAAGCUGUCUCAA 3'
: : : : : : : : : : : : : : : :
query 3' UUCAGUUUCGACAGAGUU 5'
query=miR5246, target=R03G_09942, score=0, range=226-243, strand=

```





query 3' UUCAGUUUCGACAGAGUU 5'  
query=miR5246, target=R03G\_12189, score=0, range=313-330, strand=  
target 5' AAGUCAAAAGCUGUCUCA 3'

query 3' UUCAGUUUCGACAGAGUU 5'  
query=miR5246, target=R03G\_12062, score=0, range=313-330, strand=  
target 5' AAGUCAAAAGCUGUCUCA 3'

query 3' UUCAGUUUCGACAGAGUU 5'  
query=miR5246, target=R03G\_16540, score=0, range=313-330, strand=  
target 5' AAGUCAAAAGCUGUCUCA 3'

query 3' UUCAGUUUCGACAGAGUU 5'  
query=miR5246, target=R03G\_16120, score=0, range=313-330, strand=  
target 5' AAGUCAAAAGCUGUCUCA 3'

query 3' UUCAGUUUCGACAGAGUU 5'  
query=miR5246, target=R03G\_17461, score=0, range=313-330, strand=  
target 5' AAGUCAAAAGCUGUCUCA 3'

query 3' UUCAGUUUCGACAGAGUU 5'  
query=miR5246, target=R03G\_03608, score=0, range=313-330, strand=  
target 5' AAGUCAAAAGCUGUCUCA 3'

query 3' UUCAGUUUCGACAGAGUU 5'  
query=miR5246, target=R03G\_13295, score=0, range=586-603, strand=  
target 5' AAGUCAAAAGCUGUCUCA 3'

query 3' UUCAGUUUCGACAGAGUU 5'  
query=miR5246, target=R03G\_01310, score=0, range=586-603, strand=  
target 5' AAGUCAAAAGCUGUCUCA 3'

query 3' UUCAGUUUCGACAGAGUU 5'  
query=miR5246, target=R03G\_03989, score=0, range=586-603, strand=  
target 5' AAGUCAAAAGCUGUCUCA 3'

query 3' UUCAGUUUCGACAGAGUU 5'  
query=miR5246, target=R03G\_13754, score=0, range=850-867, strand=  
target 5' AAGUCAAAAGCUGUCUCA 3'

query 3' UUCAGUUUCGACAGAGUU 5'  
query=miR5246, target=R03G\_07673, score=0, range=850-867, strand=  
target 5' AAGUCAAAAGCUGUCUCA 3'

query 3' UUCAGUUUCGACAGAGUU 5'  
query=miR5246, target=R03G\_01938, score=0, range=850-867, strand=  
target 5' AAGUCAAAAGCUGUCUCA 3'  
.....  
query 3' UUCAGUUUCGACAGAGUU 5'  
query=miR5246, target=R03G\_12173, score=0, range=646-663, strand=  
target 5' AAGUCAAAAGCUGUCUCA 3'  
.....  
query 3' UUCAGUUUCGACAGAGUU 5'  
query=miR5246, target=R03G\_01710, score=0, range=238-255, strand=  
target 5' AAGUCAAAAGCUGUCUCA 3'  
.....  
query 3' UUCAGUUUCGACAGAGUU 5'  
query=miR5246, target=R03G\_08455, score=1.5, range=762-779, stran  
target 5' GAUUCAAAAGCUGUCUCA 3'  
. : .....  
query 3' UUCAGUUUCGACAGAGUU 5'  
query=miR5246, target=R03G\_16144, score=2, range=850-867, strand=  
target 5' AAGUCAAAACUGUCUCA 3'  
..... : .....  
query 3' UUCAGUUUCGACAGAGUU 5'  
query=miR5246, target=R03G\_09215, score=2, range=477-493, strand=  
target 5' AAG-CAAAGCUGUCUCGA 3'  
: : ..... :  
query 3' UUCAGUUUCGACAGAGUU 5'  
query=miR5246, target=R03G\_09763, score=3, range=628-645, strand=  
target 5' GAAUAAAAGCUGUUUCA 3'  
. : ..... :  
query 3' UUCAGUUUCGACAGAGUU 5'  
query=miR5246, target=R03G\_16293, score=3, range=1171-1188, stran  
target 5' AAUUCAAAAGCUGUCUGAA 3'  
: : ..... : :  
query 3' UUCAGUUUCGACAGAGUU 5'  
query=miR5246, target=R03G\_06799, score=3, range=2959-2977, stran  
target 5' AUGUCAAAAGGCUGUCUCA 3'  
: : ..... : :  
query 3' UUCAGUUU-CGACAGAGUU 5'  
query=miR5246, target=R03G\_01135, score=3, range=2618-2634, stran  
target 5' AAGGCAAAGCUG-CUCA 3'  
: : ..... : :  
query 3' UUCAGUUUCGACAGAGUU 5'  
query=miR5246, target=R03G\_00648, score=3, range=426-444, strand=  
target 5' AAGUCCAAGCAUGUCUCA 3'  
: : ..... : :  
query 3' UUCAGUUUCG-ACAGAGUU 5'

query=miR5246, target=R03G\_05035, score=3, range=1720-1738, stran  
target 5' AAGUCAAAAGUUGUUUCA 3'  
::::: ::::: ::::: ::::: ::::: :::::  
query 3' UUCAG-UUUCGACAGAGUU 5'  
query=miR5246, target=R03G\_10647, score=3, range=914-931, strand=  
target 5' UAGCCAAAGCUGUUUCA 3'  
:: ::::: ::::: ::::: ::::: :::::  
query 3' UUCAGUUUCGACAGAGUU 5'  
query=miR5246, target=R03G\_07588, score=3.5, range=106-122, stran  
target 5' AAGUUGAAGCUGUC-CAA 3'  
::::: ::::: ::::: ::::: ::::: :::::  
query 3' UUCAGUUUCGACAGAGUU 5'  
query=miR5246, target=R03G\_05836, score=3.5, range=767-785, stran  
target 5' AAUUAAAAGCUGUCAUCA 3'  
:: ::::: ::::: ::::: ::::: :::::  
query 3' UUCAGUUUCGACAG-AGUU 5'  
query=miR5246, target=R03G\_11399, score=3.5, range=830-847, stran  
target 5' AAAAUAAAAGCUGUCUUA 3'  
:: ::::: ::::: ::::: ::::: :::::  
query 3' UUCAGUUUCGACAGAGUU 5'  
query=miR5246, target=R03G\_10474, score=3.5, range=1487-1503, str  
target 5' GAG-CAAAGCUGUCACAA 3'  
::: ::::: ::::: ::::: ::::: :::::  
query 3' UUCAGUUUCGACAGAGUU 5'  
query=miR5246, target=R03G\_01898, score=3.5, range=631-648, stran  
target 5' AGGCCAAAGUUGUCUCAU 3'  
::: ::::: ::::: ::::: ::::: :::::  
query 3' UUCAGUUUCGACAGAGUU 5'  
query=miR5246, target=R03G\_00739, score=3.5, range=793-810, stran  
target 5' AAGGUAAGCUGUUUCAU 3'  
::: ::::: ::::: ::::: ::::: :::::  
query 3' UUCAGUUUCGACAGAGUU 5'  
query=miR5246, target=R03G\_03011, score=3.5, range=587-604, stran  
target 5' AUGCUAAAAGUUGUCUCA 3'  
: : ::::: ::::: ::::: ::::: :::::  
query 3' UUCAGUUUCGACAGAGUU 5'  
query=miR5246, target=R03G\_15244, score=4, range=605-622, strand=  
target 5' AAGUCAAGCUGUAUUUA 3'  
::::: ::::: ::::: ::::: ::::: :::::  
query 3' UUCAGUUUCGACAGAGUU 5'  
query=miR5246, target=R03G\_07201, score=4, range=883-901, strand=  
target 5' AAGCUCAAAGCUGUUUUGA 3'  
::: ::::: ::::: ::::: ::::: :::::  
query 3' UUC-AGUUUCGACAGAGUU 5'  
query=miR5246, target=R03G\_04477, score=4, range=3244-3261, stran



:: ::::::::::::::  
query 3' UUCAGUUUCGACAGAGUU 5'  
query=miR5246, target=R03G\_08520, score=4, range=245-261, strand=  
target 5' AAG-CAAAGCUGUCUGAU 3'  
::: :::::::::::::: :  
query 3' UUCAGUUUCGACAGAGUU 5'  
query=miR5246, target=R03G\_09251, score=4, range=1394-1410, stran  
target 5' AACUCAAGG-UGUCUCA 3'  
:: ::::::: ::::::::::::::  
query 3' UUCAGUUUCGACAGAGUU 5'  
query=miR5246, target=R03G\_14233, score=4, range=773-789, strand=  
target 5' AAG-AAAAUCUGUCUCA 3'  
::: ::: ::::::::::::::  
query 3' UUCAGUUUCGACAGAGUU 5'  
query=miR5246, target=R03G\_04347, score=4, range=455-472, strand=  
target 5' GAAUCGAAGCUGUUUCAG 3'  
. : :::::::::::::::  
query 3' UUCAGUUUCGACAGAGUU 5'  
query=miR5246, target=R03G\_05919, score=4, range=2729-2746, stran  
target 5' CAGUAAAAGUUGUCUUA 3'  
::: :::::::::::::::  
query 3' UUCAGUUUCGACAGAGUU 5'  
query=miR5246, target=R03G\_08711, score=4, range=857-874, strand=  
target 5' AAGCCAAAGCUGUUUCGC 3'  
::: :::::::::::::::  
query 3' UUCAGUUUCGACAGAGUU 5'  
query=miR5246, target=R03G\_06460, score=4, range=56-74, strand=-1  
target 5' CAGUCUGAAGUUGUCUCA 3'  
::: : :::::::::::::::  
query 3' UUCAG-UUUCGACAGAGUU 5'  
query=miR5246, target=R03G\_06926, score=4, range=2503-2521, stran  
target 5' AAGUCAAGCUGUAGUCA 3'  
: ::::::::::::::: :::  
query 3' UUCAGUUUCGACA-GAGUU 5'  
query=miR5246, target=R03G\_16145, score=4, range=601-619, strand=  
target 5' AAGUGAAAGCUGUUUCAA 3'  
: ::: : :::::::::::::::  
query 3' UUCAGUUUCGAC-AGAGUU 5'  
query=miR5246, target=R03G\_14757, score=4, range=656-673, strand=  
target 5' AAGGUAAAAGCUGUAUCAG 3'  
::: : ::::::::::::::: :::  
query 3' UUCAGUUUCGACAGAGUU 5'  
query=miR5246, target=R03G\_02737, score=4, range=266-283, strand=  
target 5' CAUUCAAGCUUUCUCA 3'  
: ::::::::::::::: :::::::

query 3' UUCAGUUUCGACAGAGUU 5'  
query=miR5246, target=R03G\_01341, score=4, range=413-430, strand=  
target 5' UAUUCCAAGCUGUCUCA 3'  
: :: :::::::::::::::  
query 3' UUCAGUUUCGACAGAGUU 5'  
query=miR5246, target=R03G\_15299, score=4, range=347-364, strand=  
target 5' AAGAAAGAGCUGUCUCAU 3'  
::: :::::::::::::::  
query 3' UUCAGUUUCGACAGAGUU 5'  
query=miR5246, target=R03G\_12118, score=4, range=235-251, strand=  
target 5' AUGUC-AAGCUGUCUUA 3'  
: ::: :::::::::::::::  
query 3' UUCAGUUUCGACAGAGUU 5'  
query=miR5246, target=R03G\_03045, score=4, range=254-270, strand=  
target 5' GGUAAAAGCUGU-UCAA 3'  
....: ::::::::::::::: :  
query 3' UUCAGUUUCGACAGAGUU 5'  
query=miR5246, target=R03G\_02075, score=4, range=1025-1042, stran  
target 5' ACAUGAAGGCUGUCUCA 3'  
: : :::::::::::::::  
query 3' UUCAGUUUCGACAGAGUU 5'  
query=miR5246, target=R03G\_01514, score=4, range=1013-1030, stran  
target 5' ACAUGAAGGCUGUCUCA 3'  
: : :::::::::::::::  
query 3' UUCAGUUUCGACAGAGUU 5'  
query=miR5246, target=R03G\_02021, score=4, range=58-74, strand=-1  
target 5' AAUAAAAG-UGUCUCA 3'  
:: : ::::: :::::::::::::::  
query 3' UUCAGUUUCGACAGAGUU 5'  
query=miR5246, target=R03G\_00655, score=4, range=76-92, strand=-1  
target 5' AAGUAAAAG-UGUCUUA 3'  
::::: ::::: :::::::::::::::  
query 3' UUCAGUUUCGACAGAGUU 5'  
query=miR5246, target=R03G\_01126, score=4, range=466-484, strand=  
target 5' AGGUGGAAGCUGCUCUCA 3'  
:....: ::::::::::::::: :  
query 3' UUCAGUUUCGAC-AGAGUU 5'  
query=miR7709-3p, target=R03G\_11131, score=4, range=657-674, stra  
target 5' AUCAAUAUGUCUA-GUCA 3'  
:.....: ::::: :  
query 3' UAGUUUAUACUGAUCCAGU 5'  
query=miR7709-3p, target=R03G\_00593, score=4, range=472-489, stra  
target 5' AUGAAUAUGACU-GGUUA 3'  
::: ::::::::::::::: :  
query 3' UAGUUUAUACUGAUCCAGU 5'

query=miR1098, target=R03G\_01119, score=3.5, range=889-908, stran  
target 5' AUUAUAGAUAAAAACGCAUU 3'  
::: .:::::.....  
query 3' UAAAGUCUGUUUUUGCGUAU 5'  
query=miR1098, target=R03G\_04236, score=4, range=931-950, strand=  
target 5' GUUUUUGACAAAAACGUAUC 3'  
.::::. :.....  
query 3' UAAAGUCUGUUUUUGCGUAU 5'  
query=miR1098, target=R03G\_11375, score=4, range=1422-1442, stran  
target 5' AUUACAAGGUAAAAACGCAUA 3'  
::: : :.....  
query 3' UAAAG-UCUGUUUUUGCGUAU 5'  
query=miR1098, target=R03G\_13496, score=4, range=252-271, strand=  
target 5' GUUGCUGAUAAAAACGCAUG 3'  
.::: : :.....  
query 3' UAAAGUCUGUUUUUGCGUAU 5'  
query=miR1098, target=R03G\_03094, score=4, range=1187-1205, stran  
target 5' AUAUCA-ACAAAAAUGUAUA 3'  
:: ::: :.....  
query 3' UAAAGUCUGUUUUUGCGUAU 5'  
query=miR1098, target=R03G\_07549, score=4, range=813-832, strand=  
target 5' AGUUCCCACAAAGACGCAUA 3'  
: ::: :.....  
query 3' UAAAGUCUGUUUUUGCGUAU 5'  
query=miR1098, target=R03G\_15988, score=4, range=1420-1439, stran  
target 5' GUUUGAGGCAAAAACGCGUG 3'  
.:::: :.....  
query 3' UAAAGUCUGUUUUUGCGUAU 5'  
query=miR1098, target=R03G\_06576, score=4, range=337-356, strand=  
target 5' UUUUCAGACAAGAACCCAUA 3'  
:.....: ::::  
query 3' UAAAGUCUGUUUUUGCGUAU 5'  
query=miR1098, target=R03G\_15436, score=4, range=1483-1502, stran  
target 5' AUUUGAGGCAAGAACGCAUU 3'  
::::: :.....  
query 3' UAAAGUCUGUUUUUGCGUAU 5'  
query=miR1098, target=R03G\_14314, score=4, range=1009-1028, stran  
target 5' AUUAAAGGCGAAAACGCAUA 3'  
::: :.....  
query 3' UAAAGUCUGUUUUUGCGUAU 5'  
query=miR867, target=R03G\_07788, score=0, range=202-222, strand=-  
target 5' CUCUCUAAUAAUCCUGUUGCAA 3'  
:.....  
query 3' GAGAGAUUAAUAGGACAAGUU 5'  
query=miR867, target=R03G\_11567, score=0, range=1105-1125, strand





query 3' GAGAGAUUAAUUAGGACAAGUU 5'  
query=miR867, target=R03G\_05133, score=2, range=202-222, strand=-  
target 5' CUCUCUAAUUAUCCUGUUCAA 3'

query 3' GAGAGAUUAAUUAGGACAAGUU 5'  
query=miR867, target=R03G\_02168, score=2, range=202-222, strand=-  
target 5' CUCUCUAAUUAUCCUGUUCAA 3'

query 3' GAGAGAUUAAUUAGGACAAGUU 5'  
query=miR867, target=R03G\_05402, score=3.5, range=527-548, strand  
target 5' CUCUUAAUAAUGUCUGUUCAA 3'

query 3' GAGAGAUUAAUUA-GGACAAGUU 5'  
query=miR867, target=R03G\_06105, score=4, range=561-582, strand=1  
target 5' ACCUCUAAAUAUCCUGUUCAU 3'

query 3' GAGAGA-UUAAUUAGGACAAGUU 5'  
query=miR867, target=R03G\_14378, score=4, range=2905-2925, strand  
target 5' CUCUCGAAUCAUCUUGUUCAA 3'

query 3' GAGAGAUUAAUUAGGACAAGUU 5'  
query=miR867, target=R03G\_01636, score=4, range=202-222, strand=-  
target 5' CUCUCUAAUUAUCCUCUUCAA 3'

query 3' GAGAGAUUAAUUAGGACAAGUU 5'  
query=miR867, target=R03G\_02936, score=4, range=253-273, strand=-  
target 5' CUCUCUAAAUAUCCUGUUCAA 3'

query 3' GAGAGAUUAAUUAGGACAAGUU 5'  
query=miR867, target=R03G\_09465, score=4, range=1222-1242, strand  
target 5' CUUUUUCACAAUCCUGUUCAA 3'

query 3' GAGAGAUUAAUUAGGACAAGUU 5'  
query=miR867, target=R03G\_01015, score=4, range=1003-1022, strand  
target 5' UUUUCUAAUAAU-CUGUUCAU 3'

query 3' GAGAGAUUAAUUAGGACAAGUU 5'  
query=miR867, target=R03G\_08884, score=4, range=1339-1358, strand  
target 5' AUAUC-AAUAAUCUUGUUCAA 3'

query 3' GAGAGAUUAAUUAGGACAAGUU 5'  
query=miR8773, target=R03G\_16542, score=0, range=473-494, strand=  
target 5' AUAAACCACCGAUUGCAUCCAA 3'

query 3' UAUUUGGUGGCUAACGUAGGUU 5'  
query=miR8773, target=R03G\_07956, score=4, range=700-720, strand=  
target 5' AUACACC-CUGAUUGUAUCCAA 3'  
::: ::: :.....  
query 3' UAUUUGGUGGCUAACGUAGGUU 5'  
query=miR9738, target=R03G\_12193, score=0, range=1788-1807, stran  
target 5' GACGAGCCCAAUAUGUUUCA 3'  
.....  
query 3' CUGCUCGGGUUAUACAAAGU 5'  
query=miR9738, target=R03G\_12087, score=0, range=4782-4801, stran  
target 5' GACGAGCCCAAUAUGUUUCA 3'  
.....  
query 3' CUGCUCGGGUUAUACAAAGU 5'  
query=miR9738, target=R03G\_08612, score=0, range=4782-4801, stran  
target 5' GACGAGCCCAAUAUGUUUCA 3'  
.....  
query 3' CUGCUCGGGUUAUACAAAGU 5'  
query=miR9738, target=R03G\_14704, score=0, range=4782-4801, stran  
target 5' GACGAGCCCAAUAUGUUUCA 3'  
.....  
query 3' CUGCUCGGGUUAUACAAAGU 5'  
query=miR9738, target=R03G\_12979, score=0, range=4782-4801, stran  
target 5' GACGAGCCCAAUAUGUUUCA 3'  
.....  
query 3' CUGCUCGGGUUAUACAAAGU 5'  
query=miR9738, target=R03G\_16686, score=0, range=4782-4801, stran  
target 5' GACGAGCCCAAUAUGUUUCA 3'  
.....  
query 3' CUGCUCGGGUUAUACAAAGU 5'  
query=miR9738, target=R03G\_10555, score=0, range=4782-4801, stran  
target 5' GACGAGCCCAAUAUGUUUCA 3'  
.....  
query 3' CUGCUCGGGUUAUACAAAGU 5'  
query=miR9738, target=R03G\_05280, score=0, range=4782-4801, stran  
target 5' GACGAGCCCAAUAUGUUUCA 3'  
.....  
query 3' CUGCUCGGGUUAUACAAAGU 5'  
query=miR9738, target=R03G\_03103, score=0, range=4782-4801, stran  
target 5' GACGAGCCCAAUAUGUUUCA 3'  
.....  
query 3' CUGCUCGGGUUAUACAAAGU 5'  
query=miR9738, target=R03G\_07305, score=0, range=4782-4801, stran  
target 5' GACGAGCCCAAUAUGUUUCA 3'  
.....  
query 3' CUGCUCGGGUUAUACAAAGU 5'

query=miR9738, target=R03G\_13859, score=0, range=4566-4585, stran  
target 5' GACGAGCCCAAUAUGUUUCA 3'  
:::::::::::::::::::::  
query 3' CUGCUCGGGUUAUACAAAGU 5'  
query=miR9738, target=R03G\_05630, score=0, range=4632-4651, stran  
target 5' GACGAGCCCAAUAUGUUUCA 3'  
:::::::::::::::::::::  
query 3' CUGCUCGGGUUAUACAAAGU 5'  
query=miR9738, target=R03G\_02235, score=0, range=4125-4144, stran  
target 5' GACGAGCCCAAUAUGUUUCA 3'  
:::::::::::::::::::::  
query 3' CUGCUCGGGUUAUACAAAGU 5'  
query=miR9738, target=R03G\_03990, score=0, range=1539-1558, stran  
target 5' GACGAGCCCAAUAUGUUUCA 3'  
:::::::::::::::::::::  
query 3' CUGCUCGGGUUAUACAAAGU 5'  
query=miR9738, target=R03G\_06416, score=0, range=4941-4960, stran  
target 5' GACGAGCCCAAUAUGUUUCA 3'  
:::::::::::::::::::::  
query 3' CUGCUCGGGUUAUACAAAGU 5'  
query=miR9738, target=R03G\_16744, score=0, range=4941-4960, stran  
target 5' GACGAGCCCAAUAUGUUUCA 3'  
:::::::::::::::::::::  
query 3' CUGCUCGGGUUAUACAAAGU 5'  
query=miR9738, target=R03G\_11275, score=0, range=4941-4960, stran  
target 5' GACGAGCCCAAUAUGUUUCA 3'  
:::::::::::::::::::::  
query 3' CUGCUCGGGUUAUACAAAGU 5'  
query=miR9738, target=R03G\_01718, score=0, range=4941-4960, stran  
target 5' GACGAGCCCAAUAUGUUUCA 3'  
:::::::::::::::::::::  
query 3' CUGCUCGGGUUAUACAAAGU 5'  
query=miR9738, target=R03G\_01203, score=0, range=4941-4960, stran  
target 5' GACGAGCCCAAUAUGUUUCA 3'  
:::::::::::::::::::::  
query 3' CUGCUCGGGUUAUACAAAGU 5'  
query=miR9738, target=R03G\_10560, score=0, range=4941-4960, stran  
target 5' GACGAGCCCAAUAUGUUUCA 3'  
:::::::::::::::::::::  
query 3' CUGCUCGGGUUAUACAAAGU 5'  
query=miR9738, target=R03G\_15869, score=0, range=4941-4960, stran  
target 5' GACGAGCCCAAUAUGUUUCA 3'  
:::::::::::::::::::::  
query 3' CUGCUCGGGUUAUACAAAGU 5'  
query=miR9738, target=R03G\_11403, score=0, range=4941-4960, stran



```
.....: :
query 3' CUGCUCGGGUUAUACAAAGU 5'
query=miR9738, target=R03G_01404, score=4, range=181-199, strand=
target 5' GAUG-GUCCAAUGUGUUUC 3'
: : : : : : : : : :
query 3' CUGCUCGGGUUAUACAAAGU 5'
query=miR9738, target=R03G_05389, score=4, range=2682-2700, stran
target 5' GAUGUGUCCAAUUAU-UUUCA 3'
: : : : : : : : : :
query 3' CUGCUCGGGUUAUACAAAGU 5'
query=miR840-3p, target=R03G_01367, score=0, range=916-935, stran
target 5' GAAACUAAGGACAUAACCA 3'
: : : : : : : : : :
query 3' CUUUGAUUCCUGUAUUUGGU 5'
query=miR840-3p, target=R03G_16979, score=0, range=796-815, stran
target 5' GAAACUAAGGACAUAACCA 3'
: : : : : : : : : :
query 3' CUUUGAUUCCUGUAUUUGGU 5'
query=miR840-3p, target=R03G_12953, score=1, range=802-821, stran
target 5' GAAACUAAGGACAUGAACCA 3'
: : : : : : : : : :
query 3' CUUUGAUUCCUGUAUUUGGU 5'
query=miR840-3p, target=R03G_05752, score=3, range=107-125, stran
target 5' GAAAC-AAGGAAUUAACCA 3'
: : : : : : : : : :
query 3' CUUUGAUUCCUGUAUUUGGU 5'
query=miR840-3p, target=R03G_03482, score=3.5, range=421-441, str
target 5' GAAAUUGAAGGAUAUAACUA 3'
: : : : : : : : : :
query 3' CUUUGA-UUCCUGUAUUUGGU 5'
query=miR840-3p, target=R03G_06511, score=4, range=2111-2129, str
target 5' AAAAC-AAGGAUGUAACCA 3'
: : : : : : : : : :
query 3' CUUUGAUUCCUGUAUUUGGU 5'
query=miR840-3p, target=R03G_11502, score=4, range=432-450, stran
target 5' GGAGC-AAGUACAUAAACCA 3'
: : : : : : : : : :
query 3' CUUUGAUUCCUGUAUUUGGU 5'
query=miR840-3p, target=R03G_02506, score=4, range=1563-1582,
strand=-1
target 5' GAAGUUCAGGACUUAACCA 3'
: : : : : : : : : :
query 3' CUUUGAUUCCUGUAUUUGGU 5'
query=miR840-3p, target=R03G_07057, score=4, range=689-709, stran
target 5' GAGGCAAGAGGACAUGAACCA 3'
```

..... : ::::::::::::::  
query 3' CUUUGAU-UCCUGUAUUUGGU 5'  
query=miR840-3p, target=R03G\_00639, score=4, range=736-754, stran  
target 5' CAAAC-AAGGUCAUAAACCA 3'  
:::: :::: ::::::::::::::  
query 3' CUUUGAUUCCUGUAUUUGGU 5'  
query=miR5015, target=R03G\_13225, score=0, range=1654-1673, stran  
target 5' GUAGACUACUACAUCACCAA 3'  
::::::::::::::::::::  
query 3' CAUCUGAUGAUGUAGUGGUU 5'  
query=miR5015, target=R03G\_13219, score=0, range=1642-1661, stran  
target 5' GUAGACUACUACAUCACCAA 3'  
::::::::::::::::::::  
query 3' CAUCUGAUGAUGUAGUGGUU 5'  
query=miR5015, target=R03G\_05952, score=0, range=1522-1541, stran  
target 5' GUAGACUACUACAUCACCAA 3'  
::::::::::::::::::::  
query 3' CAUCUGAUGAUGUAGUGGUU 5'  
query=miR5015, target=R03G\_11967, score=0, range=1654-1673, stran  
target 5' GUAGACUACUACAUCACCAA 3'  
::::::::::::::::::::  
query 3' CAUCUGAUGAUGUAGUGGUU 5'  
query=miR5015, target=R03G\_03992, score=0, range=373-392, strand=  
target 5' GUAGACUACUACAUCACCAA 3'  
::::::::::::::::::::  
query 3' CAUCUGAUGAUGUAGUGGUU 5'  
query=miR5015, target=R03G\_15266, score=0, range=1642-1661, stran  
target 5' GUAGACUACUACAUCACCAA 3'  
::::::::::::::::::::  
query 3' CAUCUGAUGAUGUAGUGGUU 5'  
query=miR5015, target=R03G\_16800, score=0, range=1642-1661, stran  
target 5' GUAGACUACUACAUCACCAA 3'  
::::::::::::::::::::  
query 3' CAUCUGAUGAUGUAGUGGUU 5'  
query=miR5015, target=R03G\_16818, score=0, range=1384-1403, stran  
target 5' GUAGACUACUACAUCACCAA 3'  
::::::::::::::::::::  
query 3' CAUCUGAUGAUGUAGUGGUU 5'  
query=miR5015, target=R03G\_04121, score=0, range=1642-1661, stran  
target 5' GUAGACUACUACAUCACCAA 3'  
::::::::::::::::::::  
query 3' CAUCUGAUGAUGUAGUGGUU 5'  
query=miR5015, target=R03G\_15265, score=0, range=1642-1661, stran  
target 5' GUAGACUACUACAUCACCAA 3'  
::::::::::::::::::::

query 3' CAUCUGAUGAUGUAGUGGUU 5'  
query=miR5015, target=R03G\_13217, score=0, range=1642-1661, stran  
target 5' GUAGACUACUACAUCACCAA 3'  
.....  
query 3' CAUCUGAUGAUGUAGUGGUU 5'  
query=miR5015, target=R03G\_05640, score=0, range=1390-1409, stran  
target 5' GUAGACUACUACAUCACCAA 3'  
.....  
query 3' CAUCUGAUGAUGUAGUGGUU 5'  
query=miR5015, target=R03G\_15268, score=0, range=1642-1661, stran  
target 5' GUAGACUACUACAUCACCAA 3'  
.....  
query 3' CAUCUGAUGAUGUAGUGGUU 5'  
query=miR5015, target=R03G\_16797, score=0, range=643-662, strand=  
target 5' GUAGACUACUACAUCACCAA 3'  
.....  
query 3' CAUCUGAUGAUGUAGUGGUU 5'  
query=miR5015, target=R03G\_13222, score=0, range=1636-1655, stran  
target 5' GUAGACUACUACAUCACCAA 3'  
.....  
query 3' CAUCUGAUGAUGUAGUGGUU 5'  
query=miR5015, target=R03G\_14352, score=0, range=1642-1661, stran  
target 5' GUAGACUACUACAUCACCAA 3'  
.....  
query 3' CAUCUGAUGAUGUAGUGGUU 5'  
query=miR5015, target=R03G\_10870, score=3.5, range=373-392, stran  
target 5' GUGGACAGCUAUUAUCACCAA 3'  
.....  
query 3' CAUCUGAUGAUGUAGUGGUU 5'  
query=miR5015, target=R03G\_15674, score=4, range=694-713, strand=  
target 5' GUCGACUACUUUAUCACCAA 3'  
:: .....  
query 3' CAUCUGAUGAUGUAGUGGUU 5'  
query=miR5015, target=R03G\_07869, score=4, range=1588-1607, stran  
target 5' GUCGACUACUUUAUCACCAA 3'  
:: .....  
query 3' CAUCUGAUGAUGUAGUGGUU 5'  
query=miR5015, target=R03G\_13865, score=4, range=1615-1634, stran  
target 5' GUCGACUACUUUAUCACCAA 3'  
:: .....  
query 3' CAUCUGAUGAUGUAGUGGUU 5'  
query=miR5015, target=R03G\_10777, score=4, range=1519-1538, stran  
target 5' GUCGACUACUUUAUCACCAA 3'  
:: .....  
query 3' CAUCUGAUGAUGUAGUGGUU 5'



query=miR5015, target=R03G\_11278, score=4, range=1546-1565, stran  
target 5' GUCGACUACUUUAUCACCAA 3'  
:: :::::::::: ::::::::::  
query 3' CAUCUGAUGAUGUAGUGGUU 5'  
query=miR5015, target=R03G\_14624, score=4, range=1531-1550, stran  
target 5' GUCGACUACUUUAUCACCAA 3'  
:: :::::::::: ::::::::::  
query 3' CAUCUGAUGAUGUAGUGGUU 5'  
query=miR5015, target=R03G\_08609, score=4, range=328-347, strand=  
target 5' GUCGACUACUUUAUCACCAA 3'  
:: :::::::::: ::::::::::  
query 3' CAUCUGAUGAUGUAGUGGUU 5'  
query=miR5015, target=R03G\_01720, score=4, range=328-347, strand=  
target 5' GUCGACUACUUUAUCACCAA 3'  
:: :::::::::: ::::::::::  
query 3' CAUCUGAUGAUGUAGUGGUU 5'  
query=miR5015, target=R03G\_16171, score=4, range=11174-11192,  
strand=-1  
target 5' GUA-ACAGCUGCAUCACCAA 3'  
::: :: ::::::::::::::  
query 3' CAUCUGAUGAUGUAGUGGUU 5'  
query=miR5015, target=R03G\_01332, score=4, range=851-869, strand=  
target 5' GUA-ACAGCUGCAUCACCAA 3'  
::: :: ::::::::::::::  
query 3' CAUCUGAUGAUGUAGUGGUU 5'  
query=miR4227, target=R03G\_14636, score=0, range=38-55, strand=1  
target 5' UGAAAGAUUGGUACCAGA 3'  
::::::::::::::::::::  
query 3' ACUUUCUAACCAUGGUCU 5'  
query=miR4227, target=R03G\_13717, score=0, range=38-55, strand=1  
target 5' UGAAAGAUUGGUACCAGA 3'  
::::::::::::::::::::  
query 3' ACUUUCUAACCAUGGUCU 5'  
query=miR4227, target=R03G\_12005, score=0, range=662-679, strand=  
target 5' UGAAAGAUUGGUACCAGA 3'  
::::::::::::::::::::  
query 3' ACUUUCUAACCAUGGUCU 5'  
query=miR4227, target=R03G\_12080, score=0, range=245-262, strand=  
target 5' UGAAAGAUUGGUACCAGA 3'  
::::::::::::::::::::  
query 3' ACUUUCUAACCAUGGUCU 5'  
query=miR4227, target=R03G\_11407, score=0, range=245-262, strand=  
target 5' UGAAAGAUUGGUACCAGA 3'  
::::::::::::::::::::  
query 3' ACUUUCUAACCAUGGUCU 5'



```
target 5' UAAAAGAUUGGUACCAAG 3'
: ::::::::::::::: .
query 3' ACUUUCUAACCAUGGUCU 5'
query=miR4227, target=R03G_05523, score=3.5, range=662-679, stran
target 5' UAAAAGAUUGGUACCAAG 3'
: ::::::::::::::: .
query 3' ACUUUCUAACCAUGGUCU 5'
query=miR4227, target=R03G_10531, score=3.5, range=662-679, stran
target 5' UAAAAGAUUGGUACCAAG 3'
: ::::::::::::::: .
query 3' ACUUUCUAACCAUGGUCU 5'
query=miR4227, target=R03G_07110, score=3.5, range=662-679, stran
target 5' UAAAAGAUUGGUACCAAG 3'
: ::::::::::::::: .
query 3' ACUUUCUAACCAUGGUCU 5'
query=miR4227, target=R03G_03767, score=3.5, range=662-679, stran
target 5' UAAAAGAUUGGUACCAAG 3'
: ::::::::::::::: .
query 3' ACUUUCUAACCAUGGUCU 5'
query=miR4227, target=R03G_01949, score=3.5, range=662-679, stran
target 5' UAAAAGAUUGGUACCAAG 3'
: ::::::::::::::: .
query 3' ACUUUCUAACCAUGGUCU 5'
query=miR4227, target=R03G_07676, score=3.5, range=662-679, stran
target 5' UAAAAGAUUGGUACCAAG 3'
: ::::::::::::::: .
query 3' ACUUUCUAACCAUGGUCU 5'
query=miR4227, target=R03G_12960, score=3.5, range=323-340, stran
target 5' UAAAAGAUUGGUACCAAG 3'
: ::::::::::::::: .
query 3' ACUUUCUAACCAUGGUCU 5'
query=miR4227, target=R03G_12974, score=3.5, range=323-340, stran
target 5' UAAAAGAUUGGUACCAAG 3'
: ::::::::::::::: .
query 3' ACUUUCUAACCAUGGUCU 5'
query=miR4227, target=R03G_07866, score=3.5, range=38-55, strand=
target 5' UAAAAGAUUGGUACCAAG 3'
: ::::::::::::::: .
query 3' ACUUUCUAACCAUGGUCU 5'
query=miR4227, target=R03G_11953, score=3.5, range=539-556, stran
target 5' UAAAAGAUUGGUACCAAG 3'
: ::::::::::::::: .
query 3' ACUUUCUAACCAUGGUCU 5'
query=miR4227, target=R03G_04819, score=3.5, range=1030-1047,
strand=-1
```

```
target 5' AGGAAGAUUGGUACCCGA 3'
:.....:
query 3' ACUUUCUAACCAUGGUCU 5'
query=miR4227, target=R03G_03917, score=3.5, range=1756-1774,
strand=-1
target 5' UGUGAGAUUUGGUACCAGA 3'
:: .::: :.....:
query 3' ACUUUCU-AACCAUGGUCU 5'
query=miR4227, target=R03G_16937, score=4, range=279-296, strand=
target 5' UGAAAAAUUGGUUUAGA 3'
:.....: :.....:
query 3' ACUUUCUAACCAUGGUCU 5'
query=miR4227, target=R03G_15726, score=4, range=1739-1756, stran
target 5' UGGACGAUUGGUGUCAGG 3'
:..: :.....:
query 3' ACUUUCUAACCAUGGUCU 5'
query=miR4227, target=R03G_15739, score=4, range=292-309, strand=
target 5' CGAAAGAUUGAUUCAGA 3'
:.....: :.....:
query 3' ACUUUCUAACCAUGGUCU 5'
query=miR4227, target=R03G_01667, score=4, range=836-853, strand=
target 5' UGAAAGAUUUGUACCAA 3'
:.....: :.....:
query 3' ACUUUCUAACCAUGGUCU 5'
query=miR4227, target=R03G_02868, score=4, range=1106-1124, stran
target 5' UUGGAGAUUGGUACGCAGA 3'
: ..:.....: :.....:
query 3' ACUUUCUAACCAUG-GUCU 5'
query=miR4227, target=R03G_08086, score=4, range=184-201, strand=
target 5' UCAACCAUUGGUACCAGA 3'
: :: :.....:
query 3' ACUUUCUAACCAUGGUCU 5'
query=miR4227, target=R03G_08153, score=4, range=880-897, strand=
target 5' GGAGGCAUUGGUACCAGA 3'
:.. .:.....:
query 3' ACUUUCUAACCAUGGUCU 5'
query=miR4227, target=R03G_13522, score=4, range=10-28, strand=-1
target 5' UGAAAGAAUUGGAACCAGA 3'
:.....: :.....: :.....:
query 3' ACUUUC-UAACCAUGGUCU 5'
query=miR4227, target=R03G_01416, score=4, range=400-418, strand=
target 5' UGAAAAGGUUGAUACCAGA 3'
:: :.....: :.....:
query 3' AC-UUUCUAACCAUGGUCU 5'
query=miR4227, target=R03G_02247, score=4, range=578-595, strand=
```

```

target 5' CAAAAGAUUUGUACCAGA 3'
: : : : : : : : : : : :
query 3' ACUUUCUAACCAUGGUCU 5'
query=miR4227, target=R03G_08233, score=4, range=69-87, strand=-1
target 5' UGGGUGAUUUGGUACCAGA 3'
: : : : : : : : : : : :
query 3' ACUUUCU-AACCAUGGUCU 5'
query=miR4227, target=R03G_14174, score=4, range=1067-1084, stran
target 5' CGAUAGAUUGGUCCCAGA 3'
: : : : : : : : : : : :
query 3' ACUUUCUAACCAUGGUCU 5'
query=miR4227, target=R03G_02201, score=4, range=850-867, strand=
target 5' UAAAAGAGUGGUACCAGU 3'
: : : : : : : : : : : :
query 3' ACUUUCUAACCAUGGUCU 5'
query=miR8048-5p, target=R03G_06427, score=0, range=4006-4024,
strand=-1
target 5' CAGAUGGAAUGUAAUGAUG 3'
: : : : : : : : : : : :
query 3' GUCUACCUUACAUUACUAC 5'
query=miR8048-5p, target=R03G_02222, score=0, range=1468-1486,
strand=-1
target 5' CAGAUGGAAUGUAAUGAUG 3'
: : : : : : : : : : : :
query 3' GUCUACCUUACAUUACUAC 5'
query=miR8048-5p, target=R03G_15250, score=0, range=4369-4387,
strand=-1
target 5' CAGAUGGAAUGUAAUGAUG 3'
: : : : : : : : : : : :
query 3' GUCUACCUUACAUUACUAC 5'
query=miR8048-5p, target=R03G_17371, score=0, range=4369-4387,
strand=-1
target 5' CAGAUGGAAUGUAAUGAUG 3'
: : : : : : : : : : : :
query 3' GUCUACCUUACAUUACUAC 5'
query=miR8048-5p, target=R03G_06442, score=0, range=5071-5089,
strand=-1
target 5' CAGAUGGAAUGUAAUGAUG 3'
: : : : : : : : : : : :
query 3' GUCUACCUUACAUUACUAC 5'
query=miR8048-5p, target=R03G_11776, score=0, range=1504-1522,
strand=-1
target 5' CAGAUGGAAUGUAAUGAUG 3'
: : : : : : : : : : : :
query 3' GUCUACCUUACAUUACUAC 5'

```

query=miR8048-5p, target=R03G\_01330, score=0, range=1648-1666,  
strand=-1  
target 5' CAGAUGGAAUGUAAUGAUG 3'  
:::::::::::::::::::::  
query 3' GUCUACCUUACAUUACUAC 5'  
query=miR8048-5p, target=R03G\_14355, score=0, range=2620-2638,  
strand=-1  
target 5' CAGAUGGAAUGUAAUGAUG 3'  
:::::::::::::::::::::  
query 3' GUCUACCUUACAUUACUAC 5'  
query=miR8048-5p, target=R03G\_04115, score=0, range=1357-1375,  
strand=-1  
target 5' CAGAUGGAAUGUAAUGAUG 3'  
:::::::::::::::::::::  
query 3' GUCUACCUUACAUUACUAC 5'  
query=miR8048-5p, target=R03G\_13867, score=0, range=4330-4348,  
strand=-1  
target 5' CAGAUGGAAUGUAAUGAUG 3'  
:::::::::::::::::::::  
query 3' GUCUACCUUACAUUACUAC 5'  
query=miR8048-5p, target=R03G\_06428, score=0, range=3508-3526,  
strand=-1  
target 5' CAGAUGGAAUGUAAUGAUG 3'  
:::::::::::::::::::::  
query 3' GUCUACCUUACAUUACUAC 5'  
query=miR8048-5p, target=R03G\_01613, score=0, range=2611-2629,  
strand=-1  
target 5' CAGAUGGAAUGUAAUGAUG 3'  
:::::::::::::::::::::  
query 3' GUCUACCUUACAUUACUAC 5'  
query=miR8048-5p, target=R03G\_17326, score=0, range=4246-4264,  
strand=-1  
target 5' CAGAUGGAAUGUAAUGAUG 3'  
:::::::::::::::::::::  
query 3' GUCUACCUUACAUUACUAC 5'  
query=miR8048-5p, target=R03G\_05903, score=0, range=226-244, stra  
target 5' CAGAUGGAAUGUAAUGAUG 3'  
:::::::::::::::::::::  
query 3' GUCUACCUUACAUUACUAC 5'  
query=miR8048-5p, target=R03G\_03547, score=0, range=4414-4432,  
strand=-1  
target 5' CAGAUGGAAUGUAAUGAUG 3'  
:::::::::::::::::::::  
query 3' GUCUACCUUACAUUACUAC 5'  
query=miR8048-5p, target=R03G\_09965, score=0, range=4414-4432,

strand=-1  
target 5' CAGAUGGAAUGUAAUGAUG 3'  
::::::::::::::::::::  
query 3' GUCUACCUUACAUUACUAC 5'  
query=miR8048-5p, target=R03G\_13920, score=0, range=4414-4432,  
strand=-1  
target 5' CAGAUGGAAUGUAAUGAUG 3'  
::::::::::::::::::::  
query 3' GUCUACCUUACAUUACUAC 5'  
query=miR8048-5p, target=R03G\_02691, score=0, range=7903-7921,  
strand=-1  
target 5' CAGAUGGAAUGUAAUGAUG 3'  
::::::::::::::::::::  
query 3' GUCUACCUUACAUUACUAC 5'  
query=miR8048-5p, target=R03G\_13749, score=0, range=2923-2941,  
strand=-1  
target 5' CAGAUGGAAUGUAAUGAUG 3'  
::::::::::::::::::::  
query 3' GUCUACCUUACAUUACUAC 5'  
query=miR8048-5p, target=R03G\_05619, score=0, range=2557-2575,  
strand=-1  
target 5' CAGAUGGAAUGUAAUGAUG 3'  
::::::::::::::::::::  
query 3' GUCUACCUUACAUUACUAC 5'  
query=miR8048-5p, target=R03G\_05265, score=0, range=226-244, stra  
target 5' CAGAUGGAAUGUAAUGAUG 3'  
::::::::::::::::::::  
query 3' GUCUACCUUACAUUACUAC 5'  
query=miR8048-5p, target=R03G\_07668, score=0, range=817-835, stra  
target 5' CAGAUGGAAUGUAAUGAUG 3'  
::::::::::::::::::::  
query 3' GUCUACCUUACAUUACUAC 5'  
query=miR8048-5p, target=R03G\_02959, score=0, range=4414-4432,  
strand=-1  
target 5' CAGAUGGAAUGUAAUGAUG 3'  
::::::::::::::::::::  
query 3' GUCUACCUUACAUUACUAC 5'  
query=miR8048-5p, target=R03G\_17404, score=0, range=1042-1060,  
strand=-1  
target 5' CAGAUGGAAUGUAAUGAUG 3'  
::::::::::::::::::::  
query 3' GUCUACCUUACAUUACUAC 5'  
query=miR8048-5p, target=R03G\_10181, score=2, range=368-385, stra  
target 5' CAGA-AGAAUGUAAUGAUG 3'  
:::: ::::::::::::::

query 3' GUCUACCUUACAUUACUAC 5'  
query=miR8048-5p, target=R03G\_15517, score=3, range=444-462, strand=1  
target 5' CAGAAGGAAUGUGAUGGUG 3'  
:::: ::::::::::::::

query 3' GUCUACCUUACAUUACUAC 5'  
query=miR8048-5p, target=R03G\_14818, score=3.5, range=778-795, strand=1  
target 5' UGGGU-GAAUGUGAUGAUG 3'  
..... ::::::::::::::

query 3' GUCUACCUUACAUUACUAC 5'  
query=miR8048-5p, target=R03G\_11678, score=4, range=240-258, strand=1  
target 5' AAGAUUGAAUGUGAUGAUA 3'  
:::: ::::::::::::::

query 3' GUCUACCUUACAUUACUAC 5'  
query=miR8048-5p, target=R03G\_06144, score=4, range=456-474, strand=1  
target 5' AACAUUGGAAUGUAAUGAAG 3'  
: :::::::::::::: :

query 3' GUCUACCUUACAUUACUAC 5'  
query=miR8048-5p, target=R03G\_01072, score=4, range=2965-2982, strand=1  
target 5' CA-AUGUAAUGUGAUGAUG 3'  
:: :::: ::::::::::::::

query 3' GUCUACCUUACAUUACUAC 5'  
query=miR8048-5p, target=R03G\_00502, score=4, range=563-580, strand=1  
target 5' CAGA-GGAAUGUGAUGACG 3'  
:::: :::::::::::::: :

query 3' GUCUACCUUACAUUACUAC 5'  
query=miR8048-5p, target=R03G\_05121, score=4, range=905-922, strand=1  
target 5' CAGA-GGAAUGUAAUGCUU 3'  
:::: :::::::::::::: :

query 3' GUCUACCUUACAUUACUAC 5'  
query=miR8048-5p, target=R03G\_12982, score=4, range=281-298, strand=1  
target 5' CAACUGGAAUGU-AUGAUG 3'  
:: :::::::::::::: ::::::::::

query 3' GUCUACCUUACAUUACUAC 5'  
query=miR8048-5p, target=R03G\_06073, score=4, range=369-388, strand=1  
target 5' CUGAUGGAGUGUAAUCGAUG 3'  
: :::::::::::::: ::::

query 3' GUCUACCUUACAUUA-CUAC 5'  
query=miR8048-5p, target=R03G\_08757, score=4, range=941-958, strand=1  
target 5' CAGCU-GAAUGAAAUGAUG 3'  
::: : ::::: ::::::::::

query 3' GUCUACCUUACAUUACUAC 5'  
query=miR869.1, target=R03G\_11401, score=0, range=811-831, strand=1  
target 5' CAAUCACCAGACUUGAACCCA 3'



query 3' GUUAGUGGUCUGAACUUGGGU 5'  
query=miR869.1, target=R03G\_16551, score=0, range=811-831, strand  
target 5' CAAUCACCAGACUUGAACCCA 3'

query 3' GUUAGUGGUCUGAACUUGGGU 5'  
query=miR869.1, target=R03G\_06441, score=0, range=811-831, strand  
target 5' CAAUCACCAGACUUGAACCCA 3'

query 3' GUUAGUGGUCUGAACUUGGGU 5'  
query=miR869.1, target=R03G\_08846, score=0, range=811-831, strand  
target 5' CAAUCACCAGACUUGAACCCA 3'

query 3' GUUAGUGGUCUGAACUUGGGU 5'  
query=miR869.1, target=R03G\_11773, score=0, range=811-831, strand  
target 5' CAAUCACCAGACUUGAACCCA 3'

query 3' GUUAGUGGUCUGAACUUGGGU 5'  
query=miR869.1, target=R03G\_05635, score=0, range=811-831, strand  
target 5' CAAUCACCAGACUUGAACCCA 3'

query 3' GUUAGUGGUCUGAACUUGGGU 5'  
query=miR869.1, target=R03G\_13848, score=0, range=811-831, strand  
target 5' CAAUCACCAGACUUGAACCCA 3'

query 3' GUUAGUGGUCUGAACUUGGGU 5'  
query=miR869.1, target=R03G\_01956, score=0, range=811-831, strand  
target 5' CAAUCACCAGACUUGAACCCA 3'

query 3' GUUAGUGGUCUGAACUUGGGU 5'  
query=miR869.1, target=R03G\_17285, score=0, range=811-831, strand  
target 5' CAAUCACCAGACUUGAACCCA 3'

query 3' GUUAGUGGUCUGAACUUGGGU 5'  
query=miR869.1, target=R03G\_08661, score=0, range=811-831, strand  
target 5' CAAUCACCAGACUUGAACCCA 3'

query 3' GUUAGUGGUCUGAACUUGGGU 5'  
query=miR869.1, target=R03G\_03571, score=0, range=811-831, strand  
target 5' CAAUCACCAGACUUGAACCCA 3'

query 3' GUUAGUGGUCUGAACUUGGGU 5'  
query=miR869.1, target=R03G\_16555, score=0, range=811-831, strand  
target 5' CAAUCACCAGACUUGAACCCA 3'

query 3' GUUAGUGGUCUGAACUUGGGU 5'  
query=miR869.1, target=R03G\_15675, score=0, range=811-831, strand  
target 5' CAAUCACCAGACUUGAACCCA 3'  
.....  
query 3' GUUAGUGGUCUGAACUUGGGU 5'  
query=miR869.1, target=R03G\_02689, score=0, range=811-831, strand  
target 5' CAAUCACCAGACUUGAACCCA 3'  
.....  
query 3' GUUAGUGGUCUGAACUUGGGU 5'  
query=miR869.1, target=R03G\_09607, score=0, range=811-831, strand  
target 5' CAAUCACCAGACUUGAACCCA 3'  
.....  
query 3' GUUAGUGGUCUGAACUUGGGU 5'  
query=miR869.1, target=R03G\_13727, score=0, range=250-270, strand  
target 5' CAAUCACCAGACUUGAACCCA 3'  
.....  
query 3' GUUAGUGGUCUGAACUUGGGU 5'  
query=miR869.1, target=R03G\_16822, score=0, range=250-270, strand  
target 5' CAAUCACCAGACUUGAACCCA 3'  
.....  
query 3' GUUAGUGGUCUGAACUUGGGU 5'  
query=miR869.1, target=R03G\_13737, score=0, range=250-270, strand  
target 5' CAAUCACCAGACUUGAACCCA 3'  
.....  
query 3' GUUAGUGGUCUGAACUUGGGU 5'  
query=miR869.1, target=R03G\_07706, score=0, range=148-168, strand  
target 5' CAAUCACCAGACUUGAACCCA 3'  
.....  
query 3' GUUAGUGGUCUGAACUUGGGU 5'  
query=miR869.1, target=R03G\_06423, score=1, range=865-885, strand  
target 5' CAAUCACCGGACUUGAACCCA 3'  
.....  
query 3' GUUAGUGGUCUGAACUUGGGU 5'  
query=miR869.1, target=R03G\_10235, score=1, range=811-831, strand  
target 5' CAAUCACCGGACUUGAACCCA 3'  
.....  
query 3' GUUAGUGGUCUGAACUUGGGU 5'  
query=miR869.1, target=R03G\_00681, score=1, range=811-831, strand  
target 5' CAAUCACCGGACUUGAACCCA 3'  
.....  
query 3' GUUAGUGGUCUGAACUUGGGU 5'  
query=miR869.1, target=R03G\_09483, score=1, range=811-831, strand  
target 5' CAAUCACCGGACUUGAACCCA 3'  
.....  
query 3' GUUAGUGGUCUGAACUUGGGU 5'

query=miR869.1, target=R03G\_07875, score=1, range=811-831, strand  
target 5' CAAUCACCGGACUUGAACCCA 3'  
::::::::::::::::::::

query 3' GUUAGUGGUCUGAACUUGGGU 5'  
query=miR869.1, target=R03G\_16807, score=1, range=811-831, strand  
target 5' CAAUCACCGGACUUGAACCCA 3'  
::::::::::::::::::::

query 3' GUUAGUGGUCUGAACUUGGGU 5'  
query=miR869.1, target=R03G\_05336, score=1, range=811-831, strand  
target 5' CAAUCACCGGACUUGAACCCA 3'  
::::::::::::::::::::

query 3' GUUAGUGGUCUGAACUUGGGU 5'  
query=miR869.1, target=R03G\_07303, score=1, range=811-831, strand  
target 5' CAAUCACCGGACUUGAACCCA 3'  
::::::::::::::::::::

query 3' GUUAGUGGUCUGAACUUGGGU 5'  
query=miR869.1, target=R03G\_10732, score=1, range=811-831, strand  
target 5' CAAUCACCGGACUUGAACCCA 3'  
::::::::::::::::::::

query 3' GUUAGUGGUCUGAACUUGGGU 5'  
query=miR869.1, target=R03G\_09499, score=1, range=811-831, strand  
target 5' CAAUCACCGGACUUGAACCCA 3'  
::::::::::::::::::::

query 3' GUUAGUGGUCUGAACUUGGGU 5'  
query=miR869.1, target=R03G\_01652, score=1, range=811-831, strand  
target 5' CAAUCACCGGACUUGAACCCA 3'  
::::::::::::::::::::

query 3' GUUAGUGGUCUGAACUUGGGU 5'  
query=miR869.1, target=R03G\_14359, score=1, range=811-831, strand  
target 5' CAAUCACCGGACUUGAACCCA 3'  
::::::::::::::::::::

query 3' GUUAGUGGUCUGAACUUGGGU 5'  
query=miR869.1, target=R03G\_17382, score=1, range=811-831, strand  
target 5' CAAUCACCGGACUUGAACCCA 3'  
::::::::::::::::::::

query 3' GUUAGUGGUCUGAACUUGGGU 5'  
query=miR869.1, target=R03G\_13151, score=1, range=811-831, strand  
target 5' CAAUCACCGGACUUGAACCCA 3'  
::::::::::::::::::::

query 3' GUUAGUGGUCUGAACUUGGGU 5'  
query=miR869.1, target=R03G\_17400, score=1, range=685-705, strand  
target 5' CAAUCACCGGACUUGAACCCA 3'  
::::::::::::::::::::

query 3' GUUAGUGGUCUGAACUUGGGU 5'  
query=miR869.1, target=R03G\_05915, score=1, range=811-831, strand



```
:::: ::::::::::::::
query 3' GUUAGUGGUCUGAACUUGGGU 5'
query=miR869.1, target=R03G_06170, score=3.5, range=546-565, stra
target 5' CAAUCA-CAGACUUGAACUUG 3'
:::: ::::::::::::::
query 3' GUUAGUGGUCUGAACUUGGGU 5'
query=miR869.1, target=R03G_00766, score=4, range=1800-1819, stra
target 5' CAAUCA-CAGGCUUGAACUUA 3'
:::: ::::::::::::::
query 3' GUUAGUGGUCUGAACUUGGGU 5'
query=miR869.1, target=R03G_17260, score=4, range=1019-1039, stra
target 5' CGAUUCCCAUACUUGAACCCA 3'
:::: ::::::::::::::
query 3' GUUAGUGGUCUGAACUUGGGU 5'
query=miR447a-3p, target=R03G_15872, score=0, range=111-130, stra
target 5' CACAAAUUCUCGUCCGCAA 3'
:::: ::::::::::::::
query 3' GUGUUUUAAGAGCAGGCGUU 5'
query=miR447a-3p, target=R03G_09180, score=0, range=896-915, stra
target 5' CACAAAUUCUCGUCCGCAA 3'
:::: ::::::::::::::
query 3' GUGUUUUAAGAGCAGGCGUU 5'
query=miR447a-3p, target=R03G_16812, score=0, range=896-915, stra
target 5' CACAAAUUCUCGUCCGCAA 3'
:::: ::::::::::::::
query 3' GUGUUUUAAGAGCAGGCGUU 5'
query=miR447a-3p, target=R03G_09189, score=0, range=896-915, stra
target 5' CACAAAUUCUCGUCCGCAA 3'
:::: ::::::::::::::
query 3' GUGUUUUAAGAGCAGGCGUU 5'
query=miR447a-3p, target=R03G_14798, score=0, range=896-915, stra
target 5' CACAAAUUCUCGUCCGCAA 3'
:::: ::::::::::::::
query 3' GUGUUUUAAGAGCAGGCGUU 5'
query=miR447a-3p, target=R03G_14791, score=0, range=896-915, stra
target 5' CACAAAUUCUCGUCCGCAA 3'
:::: ::::::::::::::
query 3' GUGUUUUAAGAGCAGGCGUU 5'
query=miR447a-3p, target=R03G_16733, score=0, range=896-915, stra
target 5' CACAAAUUCUCGUCCGCAA 3'
:::: ::::::::::::::
query 3' GUGUUUUAAGAGCAGGCGUU 5'
query=miR447a-3p, target=R03G_13059, score=4, range=62-81, strand
target 5' GACAUAGUUCUCGUCUGCAG 3'
::: ::::::::::::::
```

query 3' GUGUUUUAAGAGCAGGCGUU 5'  
query=miR4412-5p, target=R03G\_01190, score=0, range=208-229, str  
target 5' AGUGCAAAGAAUAUCCGCAACA 3'  
.....  
query 3' UCACGUUUCUUAUAGGCGUUGU 5'  
query=miR4412-5p, target=R03G\_16146, score=0, range=385-406, str  
target 5' AGUGCAAAGAAUAUCCGCAACA 3'  
.....  
query 3' UCACGUUUCUUAUAGGCGUUGU 5'  
query=miR4412-5p, target=R03G\_04677, score=0, range=355-376, str  
target 5' AGUGCAAAGAAUAUCCGCAACA 3'  
.....  
query 3' UCACGUUUCUUAUAGGCGUUGU 5'  
query=miR4412-5p, target=R03G\_17448, score=0, range=349-370, str  
target 5' AGUGCAAAGAAUAUCCGCAACA 3'  
.....  
query 3' UCACGUUUCUUAUAGGCGUUGU 5'  
query=miR4412-5p, target=R03G\_01209, score=0, range=349-370, str  
target 5' AGUGCAAAGAAUAUCCGCAACA 3'  
.....  
query 3' UCACGUUUCUUAUAGGCGUUGU 5'  
query=miR4412-5p, target=R03G\_10239, score=0, range=349-370, str  
target 5' AGUGCAAAGAAUAUCCGCAACA 3'  
.....  
query 3' UCACGUUUCUUAUAGGCGUUGU 5'  
query=miR4412-5p, target=R03G\_07037, score=0, range=295-316, str  
target 5' AGUGCAAAGAAUAUCCGCAACA 3'  
.....  
query 3' UCACGUUUCUUAUAGGCGUUGU 5'  
query=miR4412-5p, target=R03G\_07032, score=0, range=283-304, str  
target 5' AGUGCAAAGAAUAUCCGCAACA 3'  
.....  
query 3' UCACGUUUCUUAUAGGCGUUGU 5'  
query=miR4412-5p, target=R03G\_12466, score=0, range=208-229, str  
target 5' AGUGCAAAGAAUAUCCGCAACA 3'  
.....  
query 3' UCACGUUUCUUAUAGGCGUUGU 5'  
query=miR4412-5p, target=R03G\_02950, score=0, range=208-229, str  
target 5' AGUGCAAAGAAUAUCCGCAACA 3'  
.....  
query 3' UCACGUUUCUUAUAGGCGUUGU 5'  
query=miR4412-5p, target=R03G\_01732, score=0, range=208-229, str  
target 5' AGUGCAAAGAAUAUCCGCAACA 3'  
.....  
query 3' UCACGUUUCUUAUAGGCGUUGU 5'







::::: ::::::::::::::  
query 3' CGAGGAGGUUUCUAUGAGGUU 5'  
query=miR477, target=R03G\_15165, score=1.5, range=1129-1149, stra  
target 5' GCUUCGCCAAAGAUACUCCAA 3'  
::::: ::::::::::::::  
query 3' CGAGGAGGUUUCUAUGAGGUU 5'  
query=miR477, target=R03G\_17431, score=1.5, range=1129-1149, stra  
target 5' GCUUCGCCAAAGAUACUCCAA 3'  
::::: ::::::::::::::  
query 3' CGAGGAGGUUUCUAUGAGGUU 5'  
query=miR477, target=R03G\_10547, score=1.5, range=1129-1149, stra  
target 5' GCUUCGCCAAAGAUACUCCAA 3'  
::::: ::::::::::::::  
query 3' CGAGGAGGUUUCUAUGAGGUU 5'  
query=miR477, target=R03G\_17323, score=1.5, range=1129-1149, stra  
target 5' GCUUCGCCAAAGAUACUCCAA 3'  
::::: ::::::::::::::  
query 3' CGAGGAGGUUUCUAUGAGGUU 5'  
query=miR477, target=R03G\_17247, score=1.5, range=1129-1149, stra  
target 5' GCUUCGCCAAAGAUACUCCAA 3'  
::::: ::::::::::::::  
query 3' CGAGGAGGUUUCUAUGAGGUU 5'  
query=miR477, target=R03G\_07127, score=1.5, range=1129-1149, stra  
target 5' GCUUCGCCAAAGAUACUCCAA 3'  
::::: ::::::::::::::  
query 3' CGAGGAGGUUUCUAUGAGGUU 5'  
query=miR477, target=R03G\_12006, score=2, range=988-1008, strand=  
target 5' GCUUCGCCAAAGAUACUCCAG 3'  
::::: ::::::::::::::  
query 3' CGAGGAGGUUUCUAUGAGGUU 5'  
query=miR477, target=R03G\_02952, score=2.5, range=1162-1182, stra  
target 5' GCUUCGCCAAAGAUGCUCUCCAA 3'  
::::: ::::::::::::::  
query 3' CGAGGAGGUUUCUAUGAGGUU 5'  
query=miR477, target=R03G\_09164, score=2.5, range=1129-1149, stra  
target 5' GCUUCGCCAAAGAUGCUCUCCAA 3'  
::::: ::::::::::::::  
query 3' CGAGGAGGUUUCUAUGAGGUU 5'  
query=miR477, target=R03G\_17219, score=2.5, range=988-1008, stran  
target 5' GCUUCGCCAAAGAUGCUCUCCAA 3'  
::::: ::::::::::::::  
query 3' CGAGGAGGUUUCUAUGAGGUU 5'  
query=miR477, target=R03G\_12068, score=2.5, range=988-1008, stran  
target 5' GCUUCGCCAAAGAUGCUCUCCAA 3'  
::::: ::::::::::::::

query 3' CGAGGAGGUUUCUAUGAGGUU 5'  
query=miR477, target=R03G\_14707, score=3, range=988-1008, strand=  
target 5' GCUUCGCCAAAGGUACUCCAG 3'  
.....

query 3' CGAGGAGGUUUCUAUGAGGUU 5'  
query=miR477, target=R03G\_16910, score=3, range=988-1008, strand=  
target 5' GCUUCGCCAAAGGUACUCCAG 3'  
.....

query 3' CGAGGAGGUUUCUAUGAGGUU 5'  
query=miR477, target=R03G\_17245, score=3, range=988-1008, strand=  
target 5' GCUUCGCCAAAGGUACUCCAG 3'  
.....

query 3' CGAGGAGGUUUCUAUGAGGUU 5'  
query=miR477, target=R03G\_11285, score=3, range=988-1008, strand=  
target 5' GCUUCGCCAAAGGUACUCCAG 3'  
.....

query 3' CGAGGAGGUUUCUAUGAGGUU 5'  
query=miR477, target=R03G\_13710, score=3, range=988-1008, strand=  
target 5' GCUUCGCCAAAGGUACUCCAG 3'  
.....

query 3' CGAGGAGGUUUCUAUGAGGUU 5'  
query=miR477, target=R03G\_17379, score=3, range=82-102, strand=-1  
target 5' GCUUCGCCAAAGGUACUCCAG 3'  
.....

query 3' CGAGGAGGUUUCUAUGAGGUU 5'  
query=miR477, target=R03G\_01314, score=3, range=82-102, strand=-1  
target 5' GCUUCGCCAAAGGUACUCCAG 3'  
.....

query 3' CGAGGAGGUUUCUAUGAGGUU 5'  
query=miR477, target=R03G\_13739, score=3, range=82-102, strand=-1  
target 5' GCUUCGCCAAAGGUACUCCAG 3'  
.....

query 3' CGAGGAGGUUUCUAUGAGGUU 5'  
query=miR477, target=R03G\_16939, score=3.5, range=1040-1060, stra  
target 5' GCUCUUUAAAGAUAAUCCAA 3'  
.....

query 3' CGAGGAGGUUUCUAUGAGGUU 5'  
query=miR477, target=R03G\_10629, score=4, range=306-325, strand=1  
target 5' GCU-CUCGAAAAUACUCCAA 3'  
... ..

query 3' CGAGGAGGUUUCUAUGAGGUU 5'  
query=miR477, target=R03G\_13404, score=4, range=27-46, strand=1  
target 5' GAUGCU-CAAAGAUUUCCAA 3'  
: : : .....

query 3' CGAGGAGGUUUCUAUGAGGUU 5'

query=miR477, target=R03G\_17365, score=4, range=988-1008, strand=  
target 5' GCAUCGCCAAAGGUACUCCAG 3'  
:: .: :::::::::::::::  
query 3' CGAGGAGGUUUCUAUGAGGUU 5'  
query=miR477, target=R03G\_09816, score=4, range=189-208, strand=-  
target 5' GCUUCUCCAAA-AUAUUCAG 3'  
::::::::::: :::::::::::  
query 3' CGAGGAGGUUUCUAUGAGGUU 5'  
query=miR398, target=R03G\_12259, score=3.5, range=1659-1677, stra  
target 5' GGAGGU-ACCUGAGAGCACA 3'  
. : :: :::::::::::::::  
query 3' UCCCCACUGGACUCUUGUGU 5'  
query=miR398, target=R03G\_03646, score=4, range=665-684, strand=-  
target 5' CAAGGUGACUUGAGAACACA 3'  
::::::::::: :::::::::::  
query 3' UCCCCACUGGACUCUUGUGU 5'  
query=miR398, target=R03G\_07257, score=4, range=824-843, strand=-  
target 5' AUGGGUGGCCUGAGAACAAA 3'  
: ::::::::::::::: :  
query 3' UCCCCACUGGACUCUUGUGU 5'  
query=miR398, target=R03G\_16010, score=4, range=546-564, strand=-  
target 5' AGGGGUGACCUCAGAAC-CA 3'  
::::::::::: ::::: ::  
query 3' UCCCCACUGGACUCUUGUGU 5'  
query=miR398, target=R03G\_15529, score=4, range=587-605, strand=-  
target 5' AGUGGU-ACUUGAGAGCACA 3'  
:: :: :::::::::::::::  
query 3' UCCCCACUGGACUCUUGUGU 5'  
query=miR5632-5p, target=R03G\_08617, score=0, range=1689-1708,  
strand=1  
target 5' CAGUUGGAUAAAGAAUGACA 3'  
::::::::::: :::::::::::  
query 3' GUCAACCUAUUUCUACUGU 5'  
query=miR5632-5p, target=R03G\_05328, score=0, range=762-781, stra  
target 5' CAGUUGGAUAAAGAAUGACA 3'  
::::::::::: :::::::::::  
query 3' GUCAACCUAUUUCUACUGU 5'  
query=miR5632-5p, target=R03G\_10952, score=3.5, range=36-55, stra  
target 5' CGCUUGAAUAAAGAAUGGCA 3'  
. : :: :::::::::::::::  
query 3' GUCAACCUAUUUCUACUGU 5'  
query=miR5632-5p, target=R03G\_09606, score=3.5, range=2085-2104,  
strand=-1  
target 5' UCUUUUGAUAAAGAAUGACA 3'  
. : :: :::::::::::::::

query 3' GUCAACCUAUUUCUUACUGU 5'  
query=miR5632-5p, target=R03G\_01857, score=4, range=649-667, strand=1  
target 5' UAUUUGGAUAAAGAAU-ACG 3'  
.: : : : : : : : : : : : .  
query 3' GUCAACCUAUUUCUUACUGU 5'  
query=miR5632-5p, target=R03G\_07262, score=4, range=1394-1412, strand=1  
target 5' CAGUU-CAUAAAGAAUGGUA 3'  
: : : : : : : : : : : : .  
query 3' GUCAACCUAUUUCUUACUGU 5'  
query=miR5632-5p, target=R03G\_16946, score=4, range=236-256, strand=1  
target 5' CAGAUUGUAUAAAGAAUGAAA 3'  
: : : : : : : : : : : : .  
query 3' GUC-AACCUAUUUCUUACUGU 5'  
query=miR5632-5p, target=R03G\_06140, score=4, range=481-499, strand=1  
target 5' CAUUUGGAUAAAG-AUGACC 3'  
: : : : : : : : : : : : .  
query 3' GUCAACCUAUUUCUUACUGU 5'  
query=miR5632-5p, target=R03G\_12705, score=4, range=358-376, strand=1  
target 5' AAUUUGGAUAAAGAAU-ACA 3'  
: : : : : : : : : : : : .  
query 3' GUCAACCUAUUUCUUACUGU 5'  
query=miR5632-5p, target=R03G\_01483, score=4, range=457-475, strand=1  
target 5' CAUUUGUAUAAAGAAU-ACA 3'  
: : : : : : : : : : : : .  
query 3' GUCAACCUAUUUCUUACUGU 5'  
query=miR5632-5p, target=R03G\_10584, score=4, range=660-679, strand=1  
target 5' CAGUUUGAUAAAGAUUGAUA 3'  
: : : : : : : : : : : : .  
query 3' GUCAACCUAUUUCUUACUGU 5'  
query=miR5632-5p, target=R03G\_16992, score=4, range=38-56, strand=1  
target 5' UGGUU-GAUAAAGAAUGGUA 3'  
: : : : : : : : : : : : .  
query 3' GUCAACCUAUUUCUUACUGU 5'  
query=miR5632-5p, target=R03G\_03359, score=4, range=498-516, strand=1  
target 5' GAGGUGG-UAAAGAAUGACA 3'  
: : : : : : : : : : : : .  
query 3' GUCAACCUAUUUCUUACUGU 5'  
query=miR5632-5p, target=R03G\_06155, score=4, range=1158-1176, strand=-1  
target 5' GAAUU-GAUAGAGAAUGACA 3'  
: : : : : : : : : : : : .  
query 3' GUCAACCUAUUUCUUACUGU 5'  
query=miR5632-5p, target=R03G\_09999, score=4, range=384-402, strand=1  
target 5' CAG-UCCAUAAGAAUGACC 3'

::: : :::::::::::::::  
query 3' GUCAACCUAUUUCUUACUGU 5'  
query=miR5632-5p, target=R03G\_13889, score=4, range=248-266, stra  
target 5' UUGUUGGAUAAAG-AUGACG 3'  
. :::::::::::::: :::::  
query 3' GUCAACCUAUUUCUUACUGU 5'  
query=miR6282, target=R03G\_03573, score=0, range=559-580, strand=  
target 5' UUAUACAUCCCCACAUGAUCAA 3'  
:::::::::::::::::::::::::::  
query 3' AAUAUGUAGGGGUGUACUAGUU 5'  
query=miR6282, target=R03G\_10799, score=0, range=559-580, strand=  
target 5' UUAUACAUCCCCACAUGAUCAA 3'  
:::::::::::::::::::::::::::  
query 3' AAUAUGUAGGGGUGUACUAGUU 5'  
query=miR6282, target=R03G\_17239, score=0, range=559-580, strand=  
target 5' UUAUACAUCCCCACAUGAUCAA 3'  
:::::::::::::::::::::::::::  
query 3' AAUAUGUAGGGGUGUACUAGUU 5'  
query=miR6282, target=R03G\_04664, score=0, range=559-580, strand=  
target 5' UUAUACAUCCCCACAUGAUCAA 3'  
:::::::::::::::::::::::::::  
query 3' AAUAUGUAGGGGUGUACUAGUU 5'  
query=miR6282, target=R03G\_15168, score=0, range=343-364, strand=  
target 5' UUAUACAUCCCCACAUGAUCAA 3'  
:::::::::::::::::::::::::::  
query 3' AAUAUGUAGGGGUGUACUAGUU 5'  
query=miR6282, target=R03G\_01327, score=0, range=559-580, strand=  
target 5' UUAUACAUCCCCACAUGAUCAA 3'  
:::::::::::::::::::::::::::  
query 3' AAUAUGUAGGGGUGUACUAGUU 5'  
query=miR6282, target=R03G\_05522, score=3, range=559-580, strand=  
target 5' UUAUACAGCCCCACAUCAUCAA 3'  
:::::::::: :::::::::: :::::  
query 3' AAUAUGUAGGGGUGUACUAGUU 5'  
query=miR6282, target=R03G\_03112, score=3, range=559-580, strand=  
target 5' UUAUACAGCCCCACAUCAUCAA 3'  
:::::::::: :::::::::: :::::  
query 3' AAUAUGUAGGGGUGUACUAGUU 5'  
query=miR6282, target=R03G\_00240, score=3, range=502-523, strand=  
target 5' UUAUACAGCCCCACAUCAUCAA 3'  
:::::::::: :::::::::: :::::  
query 3' AAUAUGUAGGGGUGUACUAGUU 5'  
query=miR6282, target=R03G\_02227, score=3, range=559-580, strand=  
target 5' UUAUACAGCCCCACAUCAUCAA 3'  
:::::::::: :::::::::: :::::









:::::::::: : : : : :  
query 3' AAUAUGUAGGGGUGUACUAGUU 5'  
query=miR6282, target=R03G\_13267, score=3, range=193-214, strand=  
target 5' UUAUACAGCCCCACAUCAUCA 3'  
:::::::::: : : : : :  
query 3' AAUAUGUAGGGGUGUACUAGUU 5'  
query=miR6282, target=R03G\_03777, score=3, range=193-214, strand=  
target 5' UUAUACAGCCCCACAUCAUCA 3'  
:::::::::: : : : : :  
query 3' AAUAUGUAGGGGUGUACUAGUU 5'  
query=miR6282, target=R03G\_17316, score=3, range=193-214, strand=  
target 5' UUAUACAGCCCCACAUCAUCA 3'  
:::::::::: : : : : :  
query 3' AAUAUGUAGGGGUGUACUAGUU 5'  
query=miR6282, target=R03G\_03617, score=3.5, range=559-580, stran  
target 5' UCAUGCAUCCCCACAUCAUCA 3'  
: :::::::::::::: : : : : :  
query 3' AAUAUGUAGGGGUGUACUAGUU 5'  
query=miR5163b-3p, target=R03G\_02942, score=0, range=207-226, str  
target 5' UCCCACAACCAAAGUAUCUA 3'  
::::::::::::::::::::::::::  
query 3' AGGGUGUUGGUUUCUAGAU 5'  
query=miR5163b-3p, target=R03G\_10657, score=0, range=207-226, str  
target 5' UCCCACAACCAAAGUAUCUA 3'  
::::::::::::::::::::::::::  
query 3' AGGGUGUUGGUUUCUAGAU 5'  
query=miR5163b-3p, target=R03G\_12243, score=0, range=207-226, str  
target 5' UCCCACAACCAAAGUAUCUA 3'  
::::::::::::::::::::::::::  
query 3' AGGGUGUUGGUUUCUAGAU 5'  
query=miR5163b-3p, target=R03G\_01530, score=1, range=207-226, str  
target 5' UCCCACAACCAAAGUAUCUA 3'  
::::::::::::::::::::::::::  
query 3' AGGGUGUUGGUUUCUAGAU 5'  
query=miR5163b-3p, target=R03G\_04017, score=1, range=207-226, str  
target 5' UCCCACAACCAAAGUAUCUA 3'  
::::::::::::::::::::::::::  
query 3' AGGGUGUUGGUUUCUAGAU 5'  
query=miR5163b-3p, target=R03G\_03523, score=1, range=207-226, str  
target 5' UCCCACAACCAAAGUAUCUA 3'  
::::::::::::::::::::::::::  
query 3' AGGGUGUUGGUUUCUAGAU 5'  
query=miR5163b-3p, target=R03G\_04502, score=1, range=207-226, str  
target 5' UCCCACAACCAAAGUAUCUA 3'  
::::::::::::::::::::::::::

query 3' AGGGUGUUGGUUUC AUAGAU 5'  
query=miR5163b-3p, target=R03G\_15497, score=1, range=135-154, str  
target 5' UCCCACAACCAAGGUAUCUA 3'  
.....  
query 3' AGGGUGUUGGUUUC AUAGAU 5'  
query=miR5163b-3p, target=R03G\_09087, score=1, range=207-226, str  
target 5' UCCCACAACCAAGGUAUCUA 3'  
.....  
query 3' AGGGUGUUGGUUUC AUAGAU 5'  
query=miR5163b-3p, target=R03G\_05724, score=1, range=168-187, str  
target 5' UCCCACAACCAAGGUAUCUA 3'  
.....  
query 3' AGGGUGUUGGUUUC AUAGAU 5'  
query=miR5163b-3p, target=R03G\_12446, score=1, range=207-226, str  
target 5' UCCCACAACCAAGGUAUCUA 3'  
.....  
query 3' AGGGUGUUGGUUUC AUAGAU 5'  
query=miR5163b-3p, target=R03G\_13022, score=1.5, range=207-226,  
strand=1  
target 5' UCCUACAACCAAGGUAUCUA 3'  
.....  
query 3' AGGGUGUUGGUUUC AUAGAU 5'  
query=miR5163b-3p, target=R03G\_08447, score=1.5, range=207-226,  
strand=1  
target 5' UCCUACAACCAAGGUAUCUA 3'  
.....  
query 3' AGGGUGUUGGUUUC AUAGAU 5'  
query=miR5163b-3p, target=R03G\_12685, score=3, range=189-208, str  
target 5' UCCCACAACCAAGGUAUCCA 3'  
..... :  
query 3' AGGGUGUUGGUUUC AUAGAU 5'  
query=miR5163b-3p, target=R03G\_15290, score=3, range=135-154, str  
target 5' UCCCACAACCAAGUAUCUA 3'  
..... :  
query 3' AGGGUGUUGGUUUC AUAGAU 5'  
query=miR5163b-3p, target=R03G\_13307, score=3, range=168-187, str  
target 5' UCCCACAACCAAGGUUCUA 3'  
..... :  
query 3' AGGGUGUUGGUUUC AUAGAU 5'  
query=miR5163b-3p, target=R03G\_03564, score=3, range=620-639, str  
target 5' UACCACAACUAAGGUAUCUA 3'  
: ..... :  
query 3' AGGGUGUUGGUUUC AUAGAU 5'  
query=miR5163b-3p, target=R03G\_03971, score=3.5, range=207-226,  
strand=1





query 3' UAGUUUGGUCGACUGGUCU 5'  
query=miR950, target=R03G\_06838, score=4, range=189-207, strand=-  
target 5' AUGAAACUGUUGACCAGA 3'  
:: ::::: ::::: :::::  
query 3' UAGUUUGGUCGACUGGUCU 5'  
query=miR950, target=R03G\_11022, score=4, range=953-971, strand=-  
target 5' AACAUACCAGCUGAUCGGA 3'  
: :: ::::: ::::: :::::  
query 3' UAGUUUGGUCGACUGGUCU 5'  
query=miR950, target=R03G\_09400, score=4, range=427-444, strand=-  
target 5' AUC-AGCCAGCUGACCAUG 3'  
::: ::::: ::::: .  
query 3' UAGUUUGGUCGACUGGUCU 5'  
query=miR950, target=R03G\_12482, score=4, range=572-590, strand=-  
target 5' AUACAACCAGCAGACCAGA 3'  
:: ::::: ::::: :::::  
query 3' UAGUUUGGUCGACUGGUCU 5'  
query=miR9486a, target=R03G\_06014, score=2.5, range=37-57, strand  
target 5' CAAUUUUUAACUCUUGAAAGA 3'  
:.....: ::::: :::::  
query 3' CUUGGAGAUUGAGAACUUUCU 5'  
query=miR9486a, target=R03G\_08391, score=3, range=1392-1412, stra  
target 5' AAACCUAUAACUUUUGAAAGA 3'  
:.....: ::::: ::::: :::::  
query 3' CUUGGAGAUUGAGAACUUUCU 5'  
query=miR9486a, target=R03G\_11550, score=3.5, range=546-566, stra  
target 5' GGAUCUUUUACUCUUGAAAGA 3'  
:.....: ::::: ::::: :::::  
query 3' CUUGGAGAUUGAGAACUUUCU 5'  
query=miR9486a, target=R03G\_13033, score=3.5, range=266-285, stra  
target 5' GAA-UUGUAAUUCUUGAAAGA 3'  
::: .: ::::: ::::: :::::  
query 3' CUUGGAGAUUGAGAACUUUCU 5'  
query=miR9486a, target=R03G\_00830, score=4, range=582-602, strand  
target 5' GAACAUCUCAUUCUUGAAAGA 3'  
:.....: ::::: ::::: :::::  
query 3' CUUGGAGAUUGAGAACUUUCU 5'  
query=miR9486a, target=R03G\_12288, score=4, range=77-97, strand=-  
target 5' CAACUUUUUAACUCUUGAGAGC 3'  
:.....: ::::: ::::: :::::  
query 3' CUUGGAGAUUGAGAACUUUCU 5'  
query=miR9486a, target=R03G\_02132, score=4, range=1305-1324, stra  
target 5' GGA-UUAUAAUUCUUGAAAGA 3'  
:.. .: ::::: ::::: :::::  
query 3' CUUGGAGAUUGAGAACUUUCU 5'

query=miR408-5p, target=R03G\_01481, score=3, range=131-150, strand=1  
target 5' AUGUUUUGCUUGUCCUUGA 3'  
::::: ::  
query 3' UACGAGACGAACAAGGGACA 5'  
query=miR408-5p, target=R03G\_08864, score=4, range=1430-1448, strand=-1  
target 5' AU-CUCUGUUUGUCCUUGA 3'  
:: ::  
query 3' UACGAGACGAACAAGGGACA 5'  
query=miR408-5p, target=R03G\_13100, score=4, range=602-621, strand=1  
target 5' AUUAUCAGCUUGUCCUUGU 3'  
:: ::  
query 3' UACGAGACGAACAAGGGACA 5'  
query=miR2927, target=R03G\_15737, score=4, range=661-682, strand=1  
target 5' UAUGGACGUAUCACGACAGACG 3'  
.:::: : ::  
query 3' GUACCCGACUAGUGCUGUCUGU 5'  
query=miR2927, target=R03G\_12325, score=4, range=544-564, strand=1  
target 5' CAUGGACGGAUCACGACAG-CA 3'  
::::: : ::  
query 3' GUACCCGACUAGUGCUGUCUGU 5'  
query=miR847-3p, target=R03G\_16744, score=0, range=1038-1058, strand=-1  
target 5' CGACCAGAAGAAGAGGAGUCA 3'  
::::: ::  
query 3' GCUGGUCUUCUUCUCCUCAGU 5'  
query=miR847-3p, target=R03G\_01203, score=0, range=1038-1058, strand=-1  
target 5' CGACCAGAAGAAGAGGAGUCA 3'  
::::: ::  
query 3' GCUGGUCUUCUUCUCCUCAGU 5'  
query=miR847-3p, target=R03G\_11403, score=0, range=1038-1058, strand=-1  
target 5' CGACCAGAAGAAGAGGAGUCA 3'  
::::: ::  
query 3' GCUGGUCUUCUUCUCCUCAGU 5'  
query=miR847-3p, target=R03G\_06416, score=0, range=1038-1058, strand=-1  
target 5' CGACCAGAAGAAGAGGAGUCA 3'  
::::: ::  
query 3' GCUGGUCUUCUUCUCCUCAGU 5'  
query=miR847-3p, target=R03G\_01718, score=0, range=1038-1058, strand=-1  
target 5' CGACCAGAAGAAGAGGAGUCA 3'  
::::: ::

query 3' GCUGGUCUUCUUCUCCUCAGU 5'  
query=miR847-3p, target=R03G\_15869, score=0, range=1038-1058,  
strand=-1  
target 5' CGACCAGAAGAAGAGGAGUCA 3'  
::::::::::::::::::::::::::

query 3' GCUGGUCUUCUUCUCCUCAGU 5'  
query=miR847-3p, target=R03G\_10560, score=0, range=1038-1058,  
strand=-1  
target 5' CGACCAGAAGAAGAGGAGUCA 3'  
::::::::::::::::::::::::::

query 3' GCUGGUCUUCUUCUCCUCAGU 5'  
query=miR847-3p, target=R03G\_11275, score=0, range=1038-1058,  
strand=-1  
target 5' CGACCAGAAGAAGAGGAGUCA 3'  
::::::::::::::::::::::::::

query 3' GCUGGUCUUCUUCUCCUCAGU 5'  
query=miR847-3p, target=R03G\_14704, score=0, range=1038-1058,  
strand=-1  
target 5' CGACCAGAAGAAGAGGAGUCA 3'  
::::::::::::::::::::::::::

query 3' GCUGGUCUUCUUCUCCUCAGU 5'  
query=miR847-3p, target=R03G\_12979, score=0, range=1038-1058,  
strand=-1  
target 5' CGACCAGAAGAAGAGGAGUCA 3'  
::::::::::::::::::::::::::

query 3' GCUGGUCUUCUUCUCCUCAGU 5'  
query=miR847-3p, target=R03G\_10555, score=0, range=1038-1058,  
strand=-1  
target 5' CGACCAGAAGAAGAGGAGUCA 3'  
::::::::::::::::::::::::::

query 3' GCUGGUCUUCUUCUCCUCAGU 5'  
query=miR847-3p, target=R03G\_05280, score=0, range=1038-1058,  
strand=-1  
target 5' CGACCAGAAGAAGAGGAGUCA 3'  
::::::::::::::::::::::::::

query 3' GCUGGUCUUCUUCUCCUCAGU 5'  
query=miR847-3p, target=R03G\_16686, score=0, range=1038-1058,  
strand=-1  
target 5' CGACCAGAAGAAGAGGAGUCA 3'  
::::::::::::::::::::::::::

query 3' GCUGGUCUUCUUCUCCUCAGU 5'  
query=miR847-3p, target=R03G\_07305, score=0, range=1038-1058,  
strand=-1  
target 5' CGACCAGAAGAAGAGGAGUCA 3'  
::::::::::::::::::::::::::

query 3' GCUGGUCUUCUUCUCCUCAGU 5'  
query=miR847-3p, target=R03G\_03103, score=0, range=1038-1058,  
strand=-1  
target 5' CGACCAGAAGAAGAGGAGUCA 3'  
::::::::::::::::::::::::::

query 3' GCUGGUCUUCUUCUCCUCAGU 5'  
query=miR847-3p, target=R03G\_12087, score=0, range=1038-1058,  
strand=-1  
target 5' CGACCAGAAGAAGAGGAGUCA 3'  
::::::::::::::::::::::::::

query 3' GCUGGUCUUCUUCUCCUCAGU 5'  
query=miR847-3p, target=R03G\_08612, score=0, range=1038-1058,  
strand=-1  
target 5' CGACCAGAAGAAGAGGAGUCA 3'  
::::::::::::::::::::::::::

query 3' GCUGGUCUUCUUCUCCUCAGU 5'  
query=miR847-3p, target=R03G\_05630, score=0, range=1038-1058,  
strand=-1  
target 5' CGACCAGAAGAAGAGGAGUCA 3'  
::::::::::::::::::::::::::

query 3' GCUGGUCUUCUUCUCCUCAGU 5'  
query=miR847-3p, target=R03G\_13450, score=0, range=918-938, stran  
target 5' CGACCAGAAGAAGAGGAGUCA 3'  
::::::::::::::::::::::::::

query 3' GCUGGUCUUCUUCUCCUCAGU 5'  
query=miR847-3p, target=R03G\_13859, score=0, range=663-683, stran  
target 5' CGACCAGAAGAAGAGGAGUCA 3'  
::::::::::::::::::::::::::

query 3' GCUGGUCUUCUUCUCCUCAGU 5'  
query=miR847-3p, target=R03G\_02235, score=0, range=381-401, stran  
target 5' CGACCAGAAGAAGAGGAGUCA 3'  
::::::::::::::::::::::::::

query 3' GCUGGUCUUCUUCUCCUCAGU 5'  
query=miR847-3p, target=R03G\_13152, score=0, range=1038-1058,  
strand=-1  
target 5' CGACCAGAAGAAGAGGAGUCA 3'  
::::::::::::::::::::::::::

query 3' GCUGGUCUUCUUCUCCUCAGU 5'  
query=miR847-3p, target=R03G\_03988, score=0, range=1038-1058,  
strand=-1  
target 5' CGACCAGAAGAAGAGGAGUCA 3'  
::::::::::::::::::::::::::

query 3' GCUGGUCUUCUUCUCCUCAGU 5'  
query=miR847-3p, target=R03G\_12951, score=0, range=1038-1058,  
strand=-1





query 3' GAACCGUUUACGAAAGCGU 5'  
query=miR822-5p, target=R03G\_19001, score=3, range=643-661, stran  
target 5' CGGGUCAAAUGCUUUCGCA 3'  
: : :::::::::::::::  
query 3' GAACCGUUUACGAAAGCGU 5'  
query=miR822-5p, target=R03G\_07478, score=3.5, range=1699-1716,  
strand=1  
target 5' CUUGACAAAUGCUUU-GCG 3'  
:::: :::::::::: :::  
query 3' GAACCGUUUACGAAAGCGU 5'  
query=miR822-5p, target=R03G\_06931, score=3.5, range=1911-1928,  
strand=1  
target 5' CUU-CCAAAUGCUUUUGCG 3'  
::: :::::::::::::::  
query 3' GAACCGUUUACGAAAGCGU 5'  
query=miR822-5p, target=R03G\_08161, score=3.5, range=42-60, stran  
target 5' UUUGGCAAUUGCUUUUGCA 3'  
.::::: :::::::::::::::  
query 3' GAACCGUUUACGAAAGCGU 5'  
query=miR822-5p, target=R03G\_12520, score=3.5, range=498-516,  
strand=-1  
target 5' UUUGGCAAUUGCUUUUGCA 3'  
.::::: :::::::::::::::  
query 3' GAACCGUUUACGAAAGCGU 5'  
query=miR822-5p, target=R03G\_06980, score=3.5, range=318-336,  
strand=-1  
target 5' UUUGGCAAUUGCUUUUGCA 3'  
.::::: :::::::::::::::  
query 3' GAACCGUUUACGAAAGCGU 5'  
query=miR822-5p, target=R03G\_00797, score=3.5, range=498-516,  
strand=-1  
target 5' UUUGGCAAUUGCUUUUGCA 3'  
.::::: :::::::::::::::  
query 3' GAACCGUUUACGAAAGCGU 5'  
query=miR822-5p, target=R03G\_02296, score=3.5, range=1104-1122,  
strand=-1  
target 5' CUUUGC UAAUGCUUUCGCG 3'  
::: :: :::::::::::::::  
query 3' GAACCGUUUACGAAAGCGU 5'  
query=miR822-5p, target=R03G\_03451, score=3.5, range=1071-1089,  
strand=-1  
target 5' UUUCACAAAUGCUUUUGCA 3'  
.::: :::::::::::::::  
query 3' GAACCGUUUACGAAAGCGU 5'  
query=miR822-5p, target=R03G\_13257, score=4, range=462-481, stran



query=miR3510, target=R03G\_06495, score=2, range=1063-1084, stran  
target 5' UUUAGACCUGAAAGAUGGUUAA 3'  
:~::~ :~::~  
query 3' AAGUCAGGGCUUUCUACCAAUU 5'  
query=miR842, target=R03G\_11952, score=2, range=54-75, strand=-1  
target 5' AGUUGACAGAUCUGGGACCAUA 3'  
:~::~ :~::~  
query 3' CCAACUGCCUAGACCCUGGUAU 5'  
query=miR842, target=R03G\_12444, score=4, range=808-830, strand=1  
target 5' GGUAUGACGGAUUUGGGCCAUU 3'  
:~::~ :~::~  
query 3' CCA-ACUGCCUAGACCCUGGUAU 5'  
query=miR9667-5p, target=R03G\_15311, score=2.5, range=1160-1178,  
strand=-1  
target 5' GAAUCAUGUUUGUCAUUUU 3'  
:~::~ :~::~  
query 3' GUUGGUACAAACGGUUAAA 5'  
query=miR9667-5p, target=R03G\_00741, score=2.5, range=244-262,  
strand=-1  
target 5' UAACCAUGUUUGCCAACUU 3'  
.~::~ :~::~  
query 3' GUUGGUACAAACGGUUAAA 5'  
query=miR9667-5p, target=R03G\_15715, score=2.5, range=518-535,  
strand=-1  
target 5' CAACU-UGUUUGCCA AUUG 3'  
:~::~ :~::~  
query 3' GUUGGUACAAACGGUUAAA 5'  
query=miR9667-5p, target=R03G\_04417, score=3, range=1283-1301,  
strand=1  
target 5' CAAAGAUGUUUGCCGAUUU 3'  
:~::~ :~::~  
query 3' GUUGGUACAAACGGUUAAA 5'  
query=miR9667-5p, target=R03G\_10607, score=3, range=1722-1740,  
strand=-1  
target 5' GAGUUGUGUUUGCCA AUUU 3'  
:~::~ :~::~  
query 3' GUUGGUACAAACGGUUAAA 5'  
query=miR9667-5p, target=R03G\_12615, score=3.5, range=368-386,  
strand=1  
target 5' GUACUAUGUUUGCCA AUUG 3'  
:~::~ :~::~  
query 3' GUUGGUACAAACGGUUAAA 5'  
query=miR9667-5p, target=R03G\_11619, score=3.5, range=549-567,  
strand=1  
target 5' UAACCUUGUUGCCA AUUU 3'











query 3' CAUACAUACGUUUAGGAGU 5'  
query=miR7807a-3p, target=R03G\_10873, score=0, range=266-284, str  
target 5' GUAUGUAUGCAAUCCUCA 3'

query 3' CAUACAUACGUUUAGGAGU 5'  
query=miR7807a-3p, target=R03G\_10052, score=0, range=266-284, str  
target 5' GUAUGUAUGCAAUCCUCA 3'

query 3' CAUACAUACGUUUAGGAGU 5'  
query=miR7807a-3p, target=R03G\_11965, score=0, range=266-284, str  
target 5' GUAUGUAUGCAAUCCUCA 3'

query 3' CAUACAUACGUUUAGGAGU 5'  
query=miR7807a-3p, target=R03G\_01616, score=0, range=266-284, str  
target 5' GUAUGUAUGCAAUCCUCA 3'

query 3' CAUACAUACGUUUAGGAGU 5'  
query=miR7807a-3p, target=R03G\_15169, score=0, range=266-284, str  
target 5' GUAUGUAUGCAAUCCUCA 3'

query 3' CAUACAUACGUUUAGGAGU 5'  
query=miR7807a-3p, target=R03G\_15671, score=0, range=266-284, str  
target 5' GUAUGUAUGCAAUCCUCA 3'

query 3' CAUACAUACGUUUAGGAGU 5'  
query=miR7807a-3p, target=R03G\_01786, score=2.5, range=305-323,  
strand=1  
target 5' GUGUGGAUGCAAUCCUCA 3'

query 3' CAUACAUACGUUUAGGAGU 5'  
query=miR7807a-3p, target=R03G\_05487, score=3.5, range=2871-2890,  
strand=1  
target 5' CAGUGCUAUGCAAUCCUCA 3'

query 3' CAUAC-AUACGUUUAGGAGU 5'  
query=miR7807a-3p, target=R03G\_08715, score=4, range=452-469, str  
target 5' GUG-GUAUGCAAUUUUCG 3'

query 3' CAUACAUACGUUUAGGAGU 5'  
query=miR7807a-3p, target=R03G\_12723, score=4, range=224-241, str  
target 5' GUG-GUAUGCAAUCCUUUG 3'

query 3' CAUACAUACGUUUAGGAGU 5'  
query=miR7807a-3p, target=R03G\_09457, score=4, range=661-680, str

```

target 5' GUGUUUGUUGCAAAUCCUCA 3'
::: :. : : : : : : : : : : : : :
query 3' CAUACAU-ACGUUUUAGGAGU 5'
query=miR7807a-3p, target=R03G_03919, score=4, range=371-389, str
target 5' GAAUCUAUGCAAAUGCUCA 3'
: : : : : : : : : : : : : :
query 3' CAUACAUACGUUUUAGGAGU 5'
query=miR7807a-3p, target=R03G_14504, score=4, range=364-382,
strand=-1
target 5' CAAUGUGUGCAAAUCCUCU 3'
: : : : : : : : : : : : : :
query 3' CAUACAUACGUUUUAGGAGU 5'
query=miR7807a-3p, target=R03G_15692, score=4, range=3492-3510,
strand=-1
target 5' GAAUGUAUGCACAUCUUA 3'
: : : : : : : : : : : : : :
query 3' CAUACAUACGUUUUAGGAGU 5'
query=miR7807a-3p, target=R03G_13262, score=4, range=336-354,
strand=-1
target 5' AUAUGUAGGC AAAUCCUCC 3'
: : : : : : : : : : : : : :
query 3' CAUACAUACGUUUUAGGAGU 5'
query=miR7807a-3p, target=R03G_05776, score=4, range=333-350,
strand=-1
target 5' GUCU-UGUGCAAAUCUUCA 3'
:: : : : : : : : : : : : : :
query 3' CAUACAUACGUUUUAGGAGU 5'
query=miR7807a-3p, target=R03G_08094, score=4, range=75-92, stran
target 5' UUAAG-AUGCAAAUUCUCA 3'
:: : : : : : : : : : : : : :
query 3' CAUACAUACGUUUUAGGAGU 5'
query=miR3440, target=R03G_15146, score=2, range=370-390, strand=
target 5' GCUUCCCCUGAUCGAAUCCA 3'
: : : : : : : : : : : : : :
query 3' CGAAAGGGAACUAGCUUAGGU 5'
query=miR3440, target=R03G_01190, score=2, range=268-288, strand=
target 5' GCUUCCCCUGAUCGAAUCCA 3'
: : : : : : : : : : : : : :
query 3' CGAAAGGGAACUAGCUUAGGU 5'
query=miR3440, target=R03G_14697, score=2.5, range=295-314, stran
target 5' GCUUUCUCUUGAUCG-AUCCA 3'
: : : : : : : : : : : : : :
query 3' CGAAAGGGAACUAGCUUAGGU 5'
query=miR3440, target=R03G_00057, score=3, range=1046-1066, stran
target 5' ACUUUUUCUUGAUCGAAUUCA 3'

```

.....  
query 3' CGAAAGGGAACUAGCUUAGGU 5'  
query=miR3440, target=R03G\_09612, score=3, range=490-510, strand=  
target 5' GCUUCCCCUGAUCGGAUCCA 3'  
.....  
query 3' CGAAAGGGAACUAGCUUAGGU 5'  
query=miR3440, target=R03G\_13271, score=3, range=490-510, strand=  
target 5' GCUUCCCCUGAUCGGAUCCA 3'  
.....  
query 3' CGAAAGGGAACUAGCUUAGGU 5'  
query=miR3440, target=R03G\_00255, score=3, range=490-510, strand=  
target 5' GCUUCCCCUGAUCGGAUCCA 3'  
.....  
query 3' CGAAAGGGAACUAGCUUAGGU 5'  
query=miR3440, target=R03G\_16545, score=3, range=490-510, strand=  
target 5' GCUUCCCCUGAUCGGAUCCA 3'  
.....  
query 3' CGAAAGGGAACUAGCUUAGGU 5'  
query=miR3440, target=R03G\_16359, score=3, range=490-510, strand=  
target 5' GCUUCCCCUGAUCGGAUCCA 3'  
.....  
query 3' CGAAAGGGAACUAGCUUAGGU 5'  
query=miR3440, target=R03G\_11266, score=3, range=313-333, strand=  
target 5' GCUUCCCUUGACCGGAUCCA 3'  
.....  
query 3' CGAAAGGGAACUAGCUUAGGU 5'  
query=miR3440, target=R03G\_14621, score=3, range=148-168, strand=  
target 5' GCUUCCCCUGAUCGGAUCCA 3'  
.....  
query 3' CGAAAGGGAACUAGCUUAGGU 5'  
query=miR3440, target=R03G\_10800, score=3, range=148-168, strand=  
target 5' GCUUCCCCUGAUCGGAUCCA 3'  
.....  
query 3' CGAAAGGGAACUAGCUUAGGU 5'  
query=miR3440, target=R03G\_14433, score=3.5, range=3575-3596,  
strand=-1  
target 5' GCAUUCCUUGAUCGAUAUCCA 3'  
:: .....  
query 3' CGAAAGGGAACUAGCU-UAGGU 5'  
query=miR3440, target=R03G\_09375, score=4, range=331-350, strand=  
target 5' GCUUUUCUUGGUC-AAUCCA 3'  
.....  
query 3' CGAAAGGGAACUAGCUUAGGU 5'  
query=miR3440, target=R03G\_07031, score=4, range=490-510, strand=  
target 5' GCUUCCCCGGAUCGAAUCCA 3'

::::: :::::  
query 3' CGAAAGGGAACUAGCUUAGGU 5'  
query=miR3440, target=R03G\_16554, score=4, range=490-510, strand=  
target 5' GCUUCCCCGGAUCGAAUCCA 3'  
::::: :::::  
query 3' CGAAAGGGAACUAGCUUAGGU 5'  
query=miR3440, target=R03G\_13277, score=4, range=490-510, strand=  
target 5' GCUUCCCCGGAUCGAAUCCA 3'  
::::: :::::  
query 3' CGAAAGGGAACUAGCUUAGGU 5'  
query=miR3440, target=R03G\_10930, score=4, range=761-782, strand=  
target 5' GCUGUCUUUUUGAUUGAAUCCA 3'  
::: : ..:::::  
query 3' CGAAAG-GGAACUAGCUUAGGU 5'  
query=miR3440, target=R03G\_10693, score=4, range=578-598, strand=  
target 5' GCAUGUUUUUGAUUCGAAUCCA 3'  
:: : ..:::::  
query 3' CGAAAGGGAACUAGCUUAGGU 5'  
query=miR3440, target=R03G\_12584, score=4, range=1127-1147, stran  
target 5' CCUUGACCUUGAUUCGAAUCCU 3'  
::: :::::::  
query 3' CGAAAGGGAACUAGCUUAGGU 5'  
query=miR6214, target=R03G\_01294, score=1, range=1752-1772, stran  
target 5' UGAUCGUCGCUCUCGUCGUCA 3'  
::::: :::::::  
query 3' ACUAGCACCGAGAGCAGCAGU 5'  
query=miR6214, target=R03G\_17251, score=1, range=387-407, strand=  
target 5' UGAUCGUCGCUCUCGUCGUCA 3'  
::::: :::::::  
query 3' ACUAGCACCGAGAGCAGCAGU 5'  
query=miR6214, target=R03G\_16366, score=3, range=2679-2699, stran  
target 5' UGAUCGUCGCUCUCGCCGUCA 3'  
::::: :::::::  
query 3' ACUAGCACCGAGAGCAGCAGU 5'  
query=miR6214, target=R03G\_07735, score=3, range=2583-2603, stran  
target 5' UGAUCGUCGCUCUCGCCGUCA 3'  
::::: :::::::  
query 3' ACUAGCACCGAGAGCAGCAGU 5'  
query=miR6214, target=R03G\_10543, score=3, range=2136-2156, stran  
target 5' UGAUCGUCGCUCUCGCCGUCA 3'  
::::: :::::::  
query 3' ACUAGCACCGAGAGCAGCAGU 5'  
query=miR6214, target=R03G\_16919, score=3, range=258-278, strand=  
target 5' UGAUCGUCGCUCUCGCCGUCA 3'  
::::: :::::::



query=miR5788, target=R03G\_14355, score=0.5, range=758-780, stran  
target 5' UACUGGAGUCUGAUAAACUAUCCA 3'  
.....  
query 3' AUGAUCUCAGACUAAUUGAUAGGU 5'  
query=miR5788, target=R03G\_04114, score=0.5, range=2552-2574, str  
target 5' UACUGGAGUCUGAUAAACUAUCCA 3'  
.....  
query 3' AUGAUCUCAGACUAAUUGAUAGGU 5'  
query=miR5788, target=R03G\_05272, score=0.5, range=2552-2574, str  
target 5' UACUGGAGUCUGAUAAACUAUCCA 3'  
.....  
query 3' AUGAUCUCAGACUAAUUGAUAGGU 5'  
query=miR5788, target=R03G\_10558, score=0.5, range=305-327, stran  
target 5' UACUGGAGUCUGAUAAACUAUCCA 3'  
.....  
query 3' AUGAUCUCAGACUAAUUGAUAGGU 5'  
query=miR5788, target=R03G\_13867, score=1, range=2468-2490, stran  
target 5' UAAUAGAGUCUGAUAAACUAUCCA 3'  
:: .....  
query 3' AUGAUCUCAGACUAAUUGAUAGGU 5'  
query=miR5788, target=R03G\_06442, score=2, range=3209-3231, stran  
target 5' UAUUGGAAUCUGAUAAACUAUCCA 3'  
.....  
query 3' AUGAUCUCAGACUAAUUGAUAGGU 5'  
query=miR5788, target=R03G\_02691, score=2, range=6041-6063, stran  
target 5' UAUUGGAAUCUGAUAAACUAUCCA 3'  
.....  
query 3' AUGAUCUCAGACUAAUUGAUAGGU 5'  
query=miR5788, target=R03G\_09965, score=2, range=2552-2574, stran  
target 5' UAUUGGAAUCUGAUAAACUAUCCA 3'  
.....  
query 3' AUGAUCUCAGACUAAUUGAUAGGU 5'  
query=miR5788, target=R03G\_13920, score=2, range=2552-2574, stran  
target 5' UAUUGGAAUCUGAUAAACUAUCCA 3'  
.....  
query 3' AUGAUCUCAGACUAAUUGAUAGGU 5'  
query=miR5788, target=R03G\_03547, score=2, range=2552-2574, stran  
target 5' UAUUGGAAUCUGAUAAACUAUCCA 3'  
.....  
query 3' AUGAUCUCAGACUAAUUGAUAGGU 5'  
query=miR5788, target=R03G\_02959, score=2, range=2552-2574, stran  
target 5' UAUUGGAAUCUGAUAAACUAUCCA 3'  
.....  
query 3' AUGAUCUCAGACUAAUUGAUAGGU 5'  
query=miR5788, target=R03G\_06427, score=2, range=2144-2166, stran

target 5' UAUUGGAAUCUGAUAAACUAUCCA 3'  
..... :  
query 3' AUGAUCUCAGACUAUUGAUAGGU 5'  
query=miR5788, target=R03G\_17326, score=2, range=2384-2406, stran  
target 5' UAUUGGAAUCUGAUAAACUAUCCA 3'  
..... :  
query 3' AUGAUCUCAGACUAUUGAUAGGU 5'  
query=miR5788, target=R03G\_06428, score=2, range=1646-1668, stran  
target 5' UAUUGGAAUCUGAUAAACUAUCCA 3'  
..... :  
query 3' AUGAUCUCAGACUAUUGAUAGGU 5'  
query=miR5788, target=R03G\_05619, score=2, range=695-717, strand=  
target 5' UAUUGGAAUCUGAUAAACUAUCCA 3'  
..... :  
query 3' AUGAUCUCAGACUAUUGAUAGGU 5'  
query=miR5788, target=R03G\_02221, score=2, range=2474-2496, stran  
target 5' UAUUGGAAUCUGAUAAACUAUCCA 3'  
..... :  
query 3' AUGAUCUCAGACUAUUGAUAGGU 5'  
query=miR5208d, target=R03G\_06502, score=2, range=1468-1489, stra  
target 5' UUGCCUACAAACUAUGACUAUA 3'  
..... :  
query 3' AACGGAUGUUUGAUACUGAUUU 5'  
query=miR5208d, target=R03G\_01733, score=2, range=1392-1413, stra  
target 5' UUGCCUACAAACUAUGACUAUA 3'  
..... :  
query 3' AACGGAUGUUUGAUACUGAUUU 5'  
query=miR5208d, target=R03G\_05865, score=2, range=1468-1489, stra  
target 5' UUGCCUACAAACUAUGACUAUA 3'  
..... :  
query 3' AACGGAUGUUUGAUACUGAUUU 5'  
query=miR5208d, target=R03G\_04662, score=2, range=1210-1231, stra  
target 5' UUGCCUACAAACUAUGACUAUA 3'  
..... :  
query 3' AACGGAUGUUUGAUACUGAUUU 5'  
query=miR5208d, target=R03G\_10991, score=3, range=1468-1489, stra  
target 5' UUGCCUACAAACUAUGACUGUA 3'  
..... :  
query 3' AACGGAUGUUUGAUACUGAUUU 5'  
query=miR5208d, target=R03G\_17287, score=3, range=1468-1489, stra  
target 5' UUGCCUACAAACUAUGACUGUA 3'  
..... :  
query 3' AACGGAUGUUUGAUACUGAUUU 5'  
query=miR5208d, target=R03G\_01944, score=3, range=1468-1489, stra  
target 5' UUGCCUACAAACUAUGACUGUA 3'

query 3' AACGGAUGUUUGAUACUGAUUU 5'  
query=miR5208d, target=R03G\_13849, score=3, range=1468-1489, strand=1  
target 5' UUGCCUACAAACUAUGACUGUA 3'

query 3' AACGGAUGUUUGAUACUGAUUU 5'  
query=miR5208d, target=R03G\_03749, score=3, range=1468-1489, strand=1  
target 5' UUGCCUACAAACUAUGACUGUA 3'

query 3' AACGGAUGUUUGAUACUGAUUU 5'  
query=miR5208d, target=R03G\_15573, score=3, range=1468-1489, strand=1  
target 5' UUGCCUACAAACUAUGACUGUA 3'

query 3' AACGGAUGUUUGAUACUGAUUU 5'  
query=miR5208d, target=R03G\_10420, score=3, range=1468-1489, strand=1  
target 5' UUGCCUACAAACUAUGACUGUA 3'

query 3' AACGGAUGUUUGAUACUGAUUU 5'  
query=miR5208d, target=R03G\_02966, score=3, range=739-760, strand=1  
target 5' UUGCCUACAAACUAUGACUGUA 3'

query 3' AACGGAUGUUUGAUACUGAUUU 5'  
query=miR5208d, target=R03G\_17446, score=3, range=1468-1489, strand=1  
target 5' UUGCCUACAAACUAUGACUGUA 3'

query 3' AACGGAUGUUUGAUACUGAUUU 5'  
query=miR5208d, target=R03G\_02708, score=3, range=1201-1222, strand=1  
target 5' UUGCCUACAAACUAUGACUGUA 3'

query 3' AACGGAUGUUUGAUACUGAUUU 5'  
query=miR5208d, target=R03G\_01056, score=4, range=1363-1384, strand=1  
target 5' CUGCCUACAAACUAUGACUACU 3'

query 3' AACGGAUGUUUGAUACUGAUUU 5'  
query=miR3440b-3p, target=R03G\_11266, score=0, range=313-334, strand=-1  
target 5' AGCUUCCCCUUGACCGGAUCCA 3'

query 3' UCGAAAGGGAACUGGCCUAGGU 5'  
query=miR3440b-3p, target=R03G\_10866, score=2, range=490-511, strand=-1  
target 5' AGCUUCCCCUGACCGGAUCCA 3'

query 3' UCGAAAGGGAACUGGCCUAGGU 5'  
query=miR3440b-3p, target=R03G\_07688, score=2, range=490-511, strand=-1



strand=-1  
target 5' AGCUUCCCCUGACCGGAUCCA 3'  
:::::::::: ::::::::::::::  
query 3' UCGAAAGGGAACUGGCCUAGGU 5'  
query=miR3440b-3p, target=R03G\_13266, score=2, range=268-289,  
strand=-1  
target 5' AGCUUCCCCUGACCGGAUCCA 3'  
:::::::::: ::::::::::::::  
query 3' UCGAAAGGGAACUGGCCUAGGU 5'  
query=miR3440b-3p, target=R03G\_13271, score=3, range=490-511,  
strand=-1  
target 5' AGCUUCCCCUGAUCGGAUCCA 3'  
:::::::::: ::::::::::::::  
query 3' UCGAAAGGGAACUGGCCUAGGU 5'  
query=miR3440b-3p, target=R03G\_16359, score=3, range=490-511,  
strand=-1  
target 5' AGCUUCCCCUGAUCGGAUCCA 3'  
:::::::::: ::::::::::::::  
query 3' UCGAAAGGGAACUGGCCUAGGU 5'  
query=miR3440b-3p, target=R03G\_16545, score=3, range=490-511,  
strand=-1  
target 5' AGCUUCCCCUGAUCGGAUCCA 3'  
:::::::::: ::::::::::::::  
query 3' UCGAAAGGGAACUGGCCUAGGU 5'  
query=miR3440b-3p, target=R03G\_00255, score=3, range=490-511,  
strand=-1  
target 5' AGCUUCCCCUGAUCGGAUCCA 3'  
:::::::::: ::::::::::::::  
query 3' UCGAAAGGGAACUGGCCUAGGU 5'  
query=miR3440b-3p, target=R03G\_09612, score=3, range=490-511,  
strand=-1  
target 5' AGCUUCCCCUGAUCGGAUCCA 3'  
:::::::::: ::::::::::::::  
query 3' UCGAAAGGGAACUGGCCUAGGU 5'  
query=miR3440b-3p, target=R03G\_14621, score=3, range=148-169,  
strand=-1  
target 5' AGCUUCCCCUGAUCGGAUCCA 3'  
:::::::::: ::::::::::::::  
query 3' UCGAAAGGGAACUGGCCUAGGU 5'  
query=miR3440b-3p, target=R03G\_10800, score=3, range=148-169,  
strand=-1  
target 5' AGCUUCCCCUGAUCGGAUCCA 3'  
:::::::::: ::::::::::::::  
query 3' UCGAAAGGGAACUGGCCUAGGU 5'  
query=miR6209, target=R03G\_07716, score=0, range=214-233, strand=



query 3' GCGUGUCGAAGACUACGAGU 5'  
query=miR6209, target=R03G\_01310, score=0, range=160-179, strand=  
target 5' CGCACAGCUUCUGAUGCUCU 3'

query 3' GCGUGUCGAAGACUACGAGU 5'  
query=miR6209, target=R03G\_01738, score=0, range=160-179, strand=  
target 5' CGCACAGCUUCUGAUGCUCU 3'

query 3' GCGUGUCGAAGACUACGAGU 5'  
query=miR6209, target=R03G\_06740, score=0, range=160-179, strand=  
target 5' CGCACAGCUUCUGAUGCUCU 3'

query 3' GCGUGUCGAAGACUACGAGU 5'  
query=miR6209, target=R03G\_13295, score=0, range=160-179, strand=  
target 5' CGCACAGCUUCUGAUGCUCU 3'

query 3' GCGUGUCGAAGACUACGAGU 5'  
query=miR6209, target=R03G\_06719, score=0, range=160-179, strand=  
target 5' CGCACAGCUUCUGAUGCUCU 3'

query 3' GCGUGUCGAAGACUACGAGU 5'  
query=miR6209, target=R03G\_03989, score=0, range=160-179, strand=  
target 5' CGCACAGCUUCUGAUGCUCU 3'

query 3' GCGUGUCGAAGACUACGAGU 5'  
query=miR6209, target=R03G\_05934, score=0, range=160-179, strand=  
target 5' CGCACAGCUUCUGAUGCUCU 3'

query 3' GCGUGUCGAAGACUACGAGU 5'  
query=miR6209, target=R03G\_13702, score=0, range=160-179, strand=  
target 5' CGCACAGCUUCUGAUGCUCU 3'

query 3' GCGUGUCGAAGACUACGAGU 5'  
query=miR6209, target=R03G\_02701, score=0, range=193-212, strand=  
target 5' CGCACAGCUUCUGAUGCUCU 3'

query 3' GCGUGUCGAAGACUACGAGU 5'  
query=miR6209, target=R03G\_10051, score=1, range=214-233, strand=  
target 5' CGCACAGUUUCUGAUGCUCU 3'

query 3' GCGUGUCGAAGACUACGAGU 5'  
query=miR6209, target=R03G\_10034, score=1, range=214-233, strand=  
target 5' CGCACAGUUUCUGAUGCUCU 3'



query=miR6209, target=R03G\_10231, score=2, range=229-248, strand=  
target 5' CGCACAGAUUCUGAUGCUCU 3'  
::::: :::::  
query 3' GCGUGUCGAAGACUACGAGU 5'  
query=miR6209, target=R03G\_12173, score=2, range=229-248, strand=  
target 5' CGCACAGAUUCUGAUGCUCU 3'  
::::: :::::  
query 3' GCGUGUCGAAGACUACGAGU 5'  
query=miR6209, target=R03G\_16430, score=2, range=193-212, strand=  
target 5' CGCACAGAUUCUGAUGCUCU 3'  
::::: :::::  
query 3' GCGUGUCGAAGACUACGAGU 5'  
query=miR6209, target=R03G\_05351, score=2, range=214-233, strand=  
target 5' CGCACAGAUUCUGAUGCUCU 3'  
::::: :::::  
query 3' GCGUGUCGAAGACUACGAGU 5'  
query=miR6209, target=R03G\_01938, score=2, range=229-248, strand=  
target 5' CGCACAGAUUCUGAUGCUCU 3'  
::::: :::::  
query 3' GCGUGUCGAAGACUACGAGU 5'  
query=miR6209, target=R03G\_07673, score=2, range=229-248, strand=  
target 5' CGCACAGCUUCUGACGCUCU 3'  
::::: :::::  
query 3' GCGUGUCGAAGACUACGAGU 5'  
query=miR6209, target=R03G\_13754, score=2, range=229-248, strand=  
target 5' CGCACAGAUUCUGAUGCUCU 3'  
::::: :::::  
query 3' GCGUGUCGAAGACUACGAGU 5'  
query=miR6209, target=R03G\_12672, score=2, range=229-248, strand=  
target 5' CGCACAGAUUCUGAUGCUCU 3'  
::::: :::::  
query 3' GCGUGUCGAAGACUACGAGU 5'  
query=miR6209, target=R03G\_07859, score=2, range=124-143, strand=  
target 5' CGCACAGAUUCUGAUGCUCU 3'  
::::: :::::  
query 3' GCGUGUCGAAGACUACGAGU 5'  
query=miR6209, target=R03G\_04128, score=3, range=229-248, strand=  
target 5' CGCACAAUCCUGAUGCUCU 3'  
::::: :::::  
query 3' GCGUGUCGAAGACUACGAGU 5'  
query=miR6209, target=R03G\_02745, score=3.5, range=595-614, stran  
target 5' CGUACAGCUUCUGGUGCUGAA 3'  
::::: :::::  
query 3' GCGUGUCGAAGACUACGAGU 5'  
query=miR6209, target=R03G\_07424, score=4, range=1182-1201, stran

```

target 5' CUUAUCGCUUUUGAUGCUCU 3'
: .:. :.....:
query 3' GCGUGUCGAAGACUACGAGU 5'
query=miR6209, target=R03G_15447, score=4, range=554-572, strand=
target 5' GGUAU-GCUUCUGAUGCUIA 3'
:.:. :.....:
query 3' GCGUGUCGAAGACUACGAGU 5'
query=miR6209, target=R03G_05013, score=4, range=442-461, strand=
target 5' AGCGUUACUUCUGAUGCUCU 3'
:.. :.....:
query 3' GCGUGUCGAAGACUACGAGU 5'
query=miR6209, target=R03G_00766, score=4, range=1648-1667, stran
target 5' CCUUUAGCUUCUGAUGCUC 3'
: . :.....:
query 3' GCGUGUCGAAGACUACGAGU 5'
query=miR6209, target=R03G_15644, score=4, range=1338-1356, stran
target 5' UGCGC-GCUUUUGAUGUUA 3'
.:. :.....:
query 3' GCGUGUCGAAGACUACGAGU 5'
query=miR6232a-3p, target=R03G_11980, score=0, range=851-873,
strand=-1
target 5' ACUUUCUUUUUUGCUAGCAUCCA 3'
:.....:
query 3' UGAAAGAAAAACGAUCGUAGGU 5'
query=miR160b, target=R03G_17051, score=2.5, range=295-314, stran
target 5' GGCAUCAAGGGAGCCAGGCG 3'
:.....:
query 3' CCGUAUGUCCCUCGGUCCGU 5'
query=miR160b, target=R03G_10617, score=3.5, range=776-794, stran
target 5' GGCAUG-AGGGAGCCAGUCA 3'
:.....:
query 3' CCGUAUGUCCCUCGGUCCGU 5'
query=miR1120c-5p, target=R03G_05642, score=3.5, range=517-537,
strand=-1
target 5' UUCUAC-AAGCAUUUUUAUAUUG 3'
:: : :.....:
query 3' CAGUUGUUUCGUAAAAUAUAAU 5'
query=miR4387a, target=R03G_15629, score=0, range=863-885, strand
target 5' AGUGUCACCCACACCGGCUUGUU 3'
:.....:
query 3' UCACAGUGGGUGUGGCCGAACAA 5'
query=miR4387a, target=R03G_01478, score=4, range=2360-2382, stra
target 5' AUUUUCACCGACACCGGCUUGUG 3'
: : :.....:
query 3' UCACAGUGGGUGUGGCCGAACAA 5'

```







:::: : ::::::::::::::  
query 3' UUGCGUAGGUAGUGUCUGGU 5'  
query=miR6182, target=R03G\_15911, score=3.5, range=115-133, stran  
target 5' AACGCGUCCAUCACA-ACCU 3'  
::::: :::::::::::::: ::  
query 3' UUGCGUAGGUAGUGUCUGGU 5'  
query=miR6182, target=R03G\_15722, score=3.5, range=398-416, stran  
target 5' AGCUC-UCCAUCACGGACCA 3'  
:: : ::::::::::::::  
query 3' UUGCGUAGGUAGUGUCUGGU 5'  
query=miR6182, target=R03G\_05899, score=4, range=1244-1262, stran  
target 5' AAC-CAACCAUCACAGAACA 3'  
::: :: :::::::::::::: ::  
query 3' UUGCGUAGGUAGUGUCUGGU 5'  
query=miR6182, target=R03G\_13262, score=4, range=832-851, strand=  
target 5' AGCUCGUCCAUCAUAGACCC 3'  
::: ::::::::::::::  
query 3' UUGCGUAGGUAGUGUCUGGU 5'  
query=miR6182, target=R03G\_16215, score=4, range=1171-1189, stran  
target 5' AACG-AUCCAUCAUAGACUC 3'  
:::: ::::::::::::::  
query 3' UUGCGUAGGUAGUGUCUGGU 5'  
query=miR8179, target=R03G\_13279, score=0, range=1928-1949, stran  
target 5' ACGAUCAAGUGAAUGCAGAUCA 3'  
::::: ::::::::::::::  
query 3' UGCUAGUUCACUUACGUCUAGU 5'  
query=miR8179, target=R03G\_17346, score=0, range=1835-1856, stran  
target 5' ACGAUCAAGUGAAUGCAGAUCA 3'  
::::: ::::::::::::::  
query 3' UGCUAGUUCACUUACGUCUAGU 5'  
query=miR8179, target=R03G\_17263, score=0, range=1085-1106, stran  
target 5' ACGAUCAAGUGAAUGCAGAUCA 3'  
::::: ::::::::::::::  
query 3' UGCUAGUUCACUUACGUCUAGU 5'  
query=miR8179, target=R03G\_10786, score=0, range=1076-1097, stran  
target 5' ACGAUCAAGUGAAUGCAGAUCA 3'  
::::: ::::::::::::::  
query 3' UGCUAGUUCACUUACGUCUAGU 5'  
query=miR8179, target=R03G\_14771, score=0, range=1028-1049, stran  
target 5' ACGAUCAAGUGAAUGCAGAUCA 3'  
::::: ::::::::::::::  
query 3' UGCUAGUUCACUUACGUCUAGU 5'  
query=miR8179, target=R03G\_15868, score=0, range=914-935, strand=  
target 5' ACGAUCAAGUGAAUGCAGAUCA 3'  
::::: ::::::::::::::





query 3' AGGUAGG-AGGAGUAGUUAU 5'  
query=miR847-5p, target=R03G\_04646, score=3, range=2874-2891,  
strand=-1  
target 5' UCC-UCUUCUUCAUCAAUA 3'  
::: ::::::::::::::::::::  
query 3' AGGUAGGAGGAGUAGUUAU 5'  
query=miR847-5p, target=R03G\_02104, score=3.5, range=719-737, str  
target 5' GCUAUCCUCUUUAUCAAUA 3'  
:::::::::::::::::::  
query 3' AGGUAGGAGGAGUAGUUAU 5'  
query=miR847-5p, target=R03G\_13827, score=3.5, range=1908-1926,  
strand=1  
target 5' UUCAUCCUCCUCAUCCAUA 3'  
:::::::::::::::::: ::  
query 3' AGGUAGGAGGAGUAGUUAU 5'  
query=miR847-5p, target=R03G\_06547, score=3.5, range=506-523, str  
target 5' UCUAUCCUCCUUA-CAAUA 3'  
::::::::::::::::::: :::::  
query 3' AGGUAGGAGGAGUAGUUAU 5'  
query=miR847-5p, target=R03G\_15183, score=3.5, range=97-115, stra  
target 5' UCCAUGCUCUCAUCAACG 3'  
::::: ::::::::::::::: .  
query 3' AGGUAGGAGGAGUAGUUAU 5'  
query=miR847-5p, target=R03G\_00192, score=3.5, range=1179-1197,  
strand=-1  
target 5' UUCGUUCUCCUCAUCAAAA 3'  
::::::::::::::::::: :  
query 3' AGGUAGGAGGAGUAGUUAU 5'  
query=miR847-5p, target=R03G\_00121, score=3.5, range=2001-2019,  
strand=-1  
target 5' UGUAUCUUCUUCAUCAAUA 3'  
: :::::::::::::::::::::  
query 3' AGGUAGGAGGAGUAGUUAU 5'  
query=miR847-5p, target=R03G\_03394, score=3.5, range=1875-1894,  
strand=-1  
target 5' UCCAUUUUUCUUCAUCAAUA 3'  
::::: :::::::::::::::::::::  
query 3' AGGU-AGGAGGAGUAGUUAU 5'  
query=miR847-5p, target=R03G\_07938, score=3.5, range=749-767,  
strand=-1  
target 5' CCCAUGCUCUUCAUCAAUG 3'  
::::: ::::::::::::::::::::.  
query 3' AGGUAGGAGGAGUAGUUAU 5'  
query=miR847-5p, target=R03G\_09251, score=4, range=878-896, stran  
target 5' UUCAGUCUUUUCAUCAAUA 3'

:::: .....  
query 3' AGGUAGGAGGAGUAGUUAU 5'  
query=miR847-5p, target=R03G\_11915, score=4, range=398-416, stran  
target 5' AUCGUCCUCCUCGUCAAUU 3'  
.....  
query 3' AGGUAGGAGGAGUAGUUAU 5'  
query=miR847-5p, target=R03G\_08494, score=4, range=399-416, stran  
target 5' UCCA-CCUCAUUAUCAUA 3'  
:::: :::: .....  
query 3' AGGUAGGAGGAGUAGUUAU 5'  
query=miR847-5p, target=R03G\_14883, score=4, range=93-110, strand  
target 5' UCC-UCCUCCUGGUCAAUA 3'  
::: ::::: .....  
query 3' AGGUAGGAGGAGUAGUUAU 5'  
query=miR847-5p, target=R03G\_06535, score=4, range=12-29, strand=  
target 5' UCC-UCCUCCUCAUCAUU 3'  
::: ::::: ::  
query 3' AGGUAGGAGGAGUAGUUAU 5'  
query=miR847-5p, target=R03G\_06879, score=4, range=342-360, stran  
target 5' AUCAUCUUCUUCAUCAAUG 3'  
.....  
query 3' AGGUAGGAGGAGUAGUUAU 5'  
query=miR847-5p, target=R03G\_01696, score=4, range=993-1011, stra  
target 5' UCCGUUCUCUUCUCAAUA 3'  
.....: :::::  
query 3' AGGUAGGAGGAGUAGUUAU 5'  
query=miR847-5p, target=R03G\_11807, score=4, range=89-108, strand  
target 5' UCCAUUCUCUUCAUCAAUG 3'  
.....: :::  
query 3' AGGUAGGAGGAGUAG-UUAU 5'  
query=miR847-5p, target=R03G\_12917, score=4, range=1002-1020,  
strand=-1  
target 5' UUCAUUAUCUUCAUCAAUA 3'  
.....: :::::  
query 3' AGGUAGGAGGAGUAGUUAU 5'  
query=miR847-5p, target=R03G\_00050, score=4, range=84-102, strand  
target 5' UUCAUUCUCCUUAUCAACA 3'  
.....: :  
query 3' AGGUAGGAGGAGUAGUUAU 5'  
query=miR847-5p, target=R03G\_15129, score=4, range=171-189, stran  
target 5' UUCAUUCUCUUCAUCCAUA 3'  
.....: :::  
query 3' AGGUAGGAGGAGUAGUUAU 5'  
query=miR847-5p, target=R03G\_12552, score=4, range=222-240, stran  
target 5' UCCACCCUUUUUAUCAUA 3'

:::: ::::::::::::::  
query 3' AGGUAGGAGGAGUAGUUAU 5'  
query=miR847-5p, target=R03G\_14552, score=4, range=147-165, stran  
target 5' UCUUCCUCUUCGUCAAUG 3'  
::: ::::::::::::::  
query 3' AGGUAGGAGGAGUAGUUAU 5'  
query=miR847-5p, target=R03G\_05342, score=4, range=147-165, stran  
target 5' UCUUCCUCUUCGUCAAUG 3'  
::: ::::::::::::::  
query 3' AGGUAGGAGGAGUAGUUAU 5'  
query=miR847-5p, target=R03G\_16368, score=4, range=147-165, stran  
target 5' UCUUCCUCUUCGUCAAUG 3'  
::: ::::::::::::::  
query 3' AGGUAGGAGGAGUAGUUAU 5'  
query=miR847-5p, target=R03G\_12077, score=4, range=219-237, stran  
target 5' UCUUCCUCUUCGUCAAUG 3'  
::: ::::::::::::::  
query 3' AGGUAGGAGGAGUAGUUAU 5'  
query=miR847-5p, target=R03G\_17393, score=4, range=219-237, stran  
target 5' UCUUCCUCUUCGUCAAUG 3'  
::: ::::::::::::::  
query 3' AGGUAGGAGGAGUAGUUAU 5'  
query=miR847-5p, target=R03G\_07693, score=4, range=147-165, stran  
target 5' UCUUCCUCUUCGUCAAUG 3'  
::: ::::::::::::::  
query 3' AGGUAGGAGGAGUAGUUAU 5'  
query=miR847-5p, target=R03G\_07978, score=4, range=147-165, stran  
target 5' UCUUCCUCUUCGUCAAUG 3'  
::: ::::::::::::::  
query 3' AGGUAGGAGGAGUAGUUAU 5'  
query=miR847-5p, target=R03G\_16899, score=4, range=147-165, stran  
target 5' UCUUCCUCUUCGUCAAUG 3'  
::: ::::::::::::::  
query 3' AGGUAGGAGGAGUAGUUAU 5'  
query=miR847-5p, target=R03G\_10518, score=4, range=147-165, stran  
target 5' UCUUCCUCUUCGUCAAUG 3'  
::: ::::::::::::::  
query 3' AGGUAGGAGGAGUAGUUAU 5'  
query=miR847-5p, target=R03G\_12012, score=4, range=147-165, stran  
target 5' UCUUCCUCUUCGUCAAUG 3'  
::: ::::::::::::::  
query 3' AGGUAGGAGGAGUAGUUAU 5'  
query=miR847-5p, target=R03G\_09492, score=4, range=147-165, stran  
target 5' UCUUCCUCUUCGUCAAUG 3'  
::: ::::::::::::::



target 5' UUUUAU-UUCUUCAUCAUA 3'  
:..:: :.....  
query 3' AGGUAGGAGGAGUAGUUAU 5'  
query=miR847-5p, target=R03G\_07589, score=4, range=1461-1480,  
strand=-1  
target 5' UGCAUCCUUCUCAUCAAUA 3'  
: :.....: :.....  
query 3' AGGUAGGAGGA-GUAGUUAU 5'  
query=miR847-5p, target=R03G\_09974, score=4, range=768-787, stran  
target 5' UCCAUCUUCUCAUCAAUA 3'  
:.....: :.....  
query 3' AGGUA-GGAGGAGUAGUUAU 5'  
query=miR847-5p, target=R03G\_12740, score=4, range=90-108, strand  
target 5' UGUUAUCUCAUCAUCAAUA 3'  
: :.....: :.....  
query 3' AGGUAGGAGGAGUAGUUAU 5'  
query=miR847-5p, target=R03G\_03984, score=4, range=630-648, stran  
target 5' UGCUUCCUUUCAUCAAUA 3'  
: : :.....: :.....  
query 3' AGGUAGGAGGAGUAGUUAU 5'  
query=miR847-5p, target=R03G\_15749, score=4, range=630-648, stran  
target 5' UGCCUCCUUUCAUCAAUA 3'  
: : :.....: :.....  
query 3' AGGUAGGAGGAGUAGUUAU 5'  
query=miR847-5p, target=R03G\_14129, score=4, range=637-656, stran  
target 5' UUCUUCUCCUCAUCAGUA 3'  
:..: :.....: :.....  
query 3' AGGUAGGAGGAGUAGU-UAU 5'  
query=miR847-5p, target=R03G\_06649, score=4, range=2271-2288,  
strand=-1  
target 5' UCCAU-CUUUUCAUCAUC 3'  
:.....: :.....  
query 3' AGGUAGGAGGAGUAGUUAU 5'  
query=miR9559-5p, target=R03G\_03878, score=2.5, range=847-866,  
strand=1  
target 5' CAAGACGAGCCAAAUAUCAA 3'  
:.....: :.....  
query 3' GUUUUACUUGGUUUUAGUUU 5'  
query=miR9559-5p, target=R03G\_16288, score=3, range=220-239, stra  
target 5' CAAAUGAAUAAAAUCAAU 3'  
:.....: :.....  
query 3' GUUUUACUUGGUUUUAGUUU 5'  
query=miR9559-5p, target=R03G\_04779, score=3, range=1075-1094,  
strand=1  
target 5' CAAAUGAAUAAAAUCAAU 3'



query 3' GUUUUACUUGGUUUUAGUUU 5'  
query=miR9559-5p, target=R03G\_07643, score=3, range=254-272, strand=1  
target 5' UAGAA-GAACCAAAAUCAGA 3'  
.....  
query 3' GUUUUACUUGGUUUUAGUUU 5'  
query=miR9559-5p, target=R03G\_09425, score=3, range=1292-1311, strand=1  
target 5' CAACAUCAACCAAAGUCAAA 3'  
...  
query 3' GUUUUACUUGGUUUUAGUUU 5'  
query=miR9559-5p, target=R03G\_14948, score=3, range=64-83, strand=1  
target 5' CAAAAGAAACCAAAAUCGAA 3'  
.....  
query 3' GUUUUACUUGGUUUUAGUUU 5'  
query=miR9559-5p, target=R03G\_07162, score=3, range=1104-1122, strand=1  
target 5' CAAAUA-AACCAAAAUGAAA 3'  
.....  
query 3' GUUUUACUUGGUUUUAGUUU 5'  
query=miR9559-5p, target=R03G\_15268, score=3, range=2419-2438, strand=-1  
target 5' GAAACUGAACCAAGAUCAAA 3'  
.....  
query 3' GUUUUACUUGGUUUUAGUUU 5'  
query=miR9559-5p, target=R03G\_16797, score=3, range=1420-1439, strand=-1  
target 5' CAAACGGAACCAAGAUCAAA 3'  
.....  
query 3' GUUUUACUUGGUUUUAGUUU 5'  
query=miR9559-5p, target=R03G\_14347, score=3.5, range=576-595, strand=1  
target 5' CAAGAUGAACCGAGAUCAAC 3'  
.....  
query 3' GUUUUACUUGGUUUUAGUUU 5'  
query=miR9559-5p, target=R03G\_06425, score=3.5, range=576-595, strand=1  
target 5' CAAGAUGAACCGAGAUCAAC 3'  
.....  
query 3' GUUUUACUUGGUUUUAGUUU 5'  
query=miR9559-5p, target=R03G\_09547, score=3.5, range=576-595, strand=1  
target 5' CAAGAUGAACCGAGAUCAAC 3'  
.....  
query 3' GUUUUACUUGGUUUUAGUUU 5'

query=miR9559-5p, target=R03G\_12677, score=3.5, range=576-595,  
strand=1  
target 5' CAAGAUGAACCGAGAUCAAC 3'  
.....  
query 3' GUUUUACUUGGUUUUAGUUU 5'  
query=miR9559-5p, target=R03G\_04933, score=3.5, range=576-595,  
strand=1  
target 5' CAAGAUGAACCGAGAUCAAC 3'  
.....  
query 3' GUUUUACUUGGUUUUAGUUU 5'  
query=miR9559-5p, target=R03G\_05330, score=3.5, range=576-595,  
strand=1  
target 5' CAAGAUGAACCGAGAUCAAC 3'  
.....  
query 3' GUUUUACUUGGUUUUAGUUU 5'  
query=miR9559-5p, target=R03G\_02704, score=3.5, range=576-595,  
strand=1  
target 5' CAAGAUGAACCGAGAUCAAC 3'  
.....  
query 3' GUUUUACUUGGUUUUAGUUU 5'  
query=miR9559-5p, target=R03G\_17021, score=3.5, range=576-595,  
strand=1  
target 5' CAAGAUGAACCGAGAUCAAC 3'  
.....  
query 3' GUUUUACUUGGUUUUAGUUU 5'  
query=miR9559-5p, target=R03G\_05344, score=3.5, range=576-595,  
strand=1  
target 5' CAAGAUGAACCGAGAUCAAC 3'  
.....  
query 3' GUUUUACUUGGUUUUAGUUU 5'  
query=miR9559-5p, target=R03G\_03778, score=3.5, range=576-595,  
strand=1  
target 5' CAAGAUGAACCGAGAUCAAC 3'  
.....  
query 3' GUUUUACUUGGUUUUAGUUU 5'  
query=miR9559-5p, target=R03G\_13722, score=3.5, range=573-592,  
strand=1  
target 5' CAAGAUGAACCGAGAUCAAC 3'  
.....  
query 3' GUUUUACUUGGUUUUAGUUU 5'  
query=miR9559-5p, target=R03G\_16939, score=3.5, range=1205-1225,  
strand=1  
target 5' UGGAACUGAAUCAAAAUCAAA 3'  
.....  
query 3' GUUUU-ACUUGGUUUUAGUUU 5'

query=miR9559-5p, target=R03G\_03924, score=3.5, range=790-808,  
strand=1  
target 5' CAAGAUGGACCAAAA-CAAA 3'  
.....: :  
query 3' GUUUUACUUGGUUUUAGUUU 5'  
query=miR9559-5p, target=R03G\_15766, score=3.5, range=389-407,  
strand=1  
target 5' UGGAA-GAACCAAAAUCAGA 3'  
.....: :  
query 3' GUUUUACUUGGUUUUAGUUU 5'  
query=miR9559-5p, target=R03G\_16050, score=3.5, range=230-248,  
strand=1  
target 5' UGGAA-GAACCAAAAUCAGA 3'  
.....: :  
query 3' GUUUUACUUGGUUUUAGUUU 5'  
query=miR9559-5p, target=R03G\_10152, score=3.5, range=2992-3011,  
strand=1  
target 5' CAGAAAAAUCAAAAUCAAA 3'  
.....: :  
query 3' GUUUUACUUGGUUUUAGUUU 5'  
query=miR9559-5p, target=R03G\_02904, score=3.5, range=1124-1143,  
strand=1  
target 5' CGAAAAUAACCGAAAUCAAA 3'  
.....: :  
query 3' GUUUUACUUGGUUUUAGUUU 5'  
query=miR9559-5p, target=R03G\_08576, score=3.5, range=393-413,  
strand=1  
target 5' CAAAAGGAAAUCAAAUCAAG 3'  
.....: :  
query 3' GUUUUAC-UUGGUUUUAGUUU 5'  
query=miR9559-5p, target=R03G\_00193, score=3.5, range=682-700,  
strand=1  
target 5' CAAGAUCAA-CAAAAUCAAA 3'  
.....: :  
query 3' GUUUUACUUGGUUUUAGUUU 5'  
query=miR9559-5p, target=R03G\_09727, score=3.5, range=1036-1055,  
strand=-1  
target 5' CAAGAAGAACCAAAAUCGAU 3'  
.....: :  
query 3' GUUUUACUUGGUUUUAGUUU 5'  
query=miR9559-5p, target=R03G\_14350, score=3.5, range=2284-2304,  
strand=-1  
target 5' GGAAAUGGAACCAAGAUCAAA 3'  
.....: :  
query 3' GUUUUA-CUUGGUUUUAGUUU 5'

query=miR9559-5p, target=R03G\_14352, score=3.5, range=2422-2442,  
strand=-1  
target 5' GGAAAUGGAACCAAGAUCAAA 3'  
.:::: :  
query 3' GUUUUA-CUUGGUUUUAGUUU 5'  
query=miR9559-5p, target=R03G\_13219, score=3.5, range=2419-2439,  
strand=-1  
target 5' GGAAAUGGAACCAAGAUCAAA 3'  
.:::: :  
query 3' GUUUUA-CUUGGUUUUAGUUU 5'  
query=miR9559-5p, target=R03G\_14777, score=3.5, range=118-138,  
strand=-1  
target 5' AGAAAUGGAACCAAGAUCAAA 3'  
.:::: :  
query 3' GUUUUA-CUUGGUUUUAGUUU 5'  
query=miR9559-5p, target=R03G\_05734, score=3.5, range=426-445,  
strand=-1  
target 5' CAAGAUCAUCCAAAAUCAAA 3'  
:::: :  
query 3' GUUUUACUUGGUUUUAGUUU 5'  
query=miR9559-5p, target=R03G\_01970, score=3.5, range=672-692,  
strand=-1  
target 5' CAAGCUUGAAUCAAAAUCAAA 3'  
::: .::::  
query 3' GUUU-UACUUGGUUUUAGUUU 5'  
query=miR9559-5p, target=R03G\_11125, score=3.5, range=447-465,  
strand=-1  
target 5' CUGAAU-AAUCAAAAUCAAA 3'  
: .::::  
query 3' GUUUUACUUGGUUUUAGUUU 5'  
query=miR9559-5p, target=R03G\_14378, score=4, range=3034-3053,  
strand=1  
target 5' CAAAUGGAUCAGAAUAAAA 3'  
:::::  
query 3' GUUUUACUUGGUUUUAGUUU 5'  
query=miR9559-5p, target=R03G\_09435, score=4, range=622-641, stra  
target 5' GAAGAUGAACUAGAAUCAAG 3'  
:::::  
query 3' GUUUUACUUGGUUUUAGUUU 5'  
query=miR9559-5p, target=R03G\_09688, score=4, range=162-182, stra  
target 5' UAGAAUCGAACCAAAGUCAGA 3'  
.:::: :  
query 3' GUUUUA-CUUGGUUUUAGUUU 5'  
query=miR9559-5p, target=R03G\_03163, score=4, range=726-745, stra  
target 5' AGAAAUGAACCAAAAUGAAG 3'











target 5' UUAAAUCUUGCAAGUCAUUC 3'  
:::: ::::::::::::::  
query 3' AAUUAAGAAUGUUCGGUAAU 5'  
query=miR5256, target=R03G\_05898, score=4, range=292-311, strand=  
target 5' UUAACUCUUACAAUCCAUUU 3'  
:::: ::::::::::::::  
query 3' AAUUAAGAAUGUUCGGUAAU 5'  
query=miR775, target=R03G\_01528, score=0, range=133-152, strand=1  
target 5' UUGACUGCAAGACAUCGCAA 3'  
::::::::::::::::::  
query 3' AACUGACGUUCUGUAGCGUU 5'  
query=miR775, target=R03G\_09419, score=0, range=226-245, strand=1  
target 5' UUGACUGCAAGACAUCGCAA 3'  
::::::::::::::::::  
query 3' AACUGACGUUCUGUAGCGUU 5'  
query=miR775, target=R03G\_11486, score=0, range=178-197, strand=1  
target 5' UUGACUGCAAGACAUCGCAA 3'  
::::::::::::::::::  
query 3' AACUGACGUUCUGUAGCGUU 5'  
query=miR775, target=R03G\_15496, score=1, range=49-68, strand=1  
target 5' UUGACUGCAAGACAUUGCAA 3'  
::::::::::::::::::  
query 3' AACUGACGUUCUGUAGCGUU 5'  
query=miR775, target=R03G\_09838, score=1, range=178-197, strand=1  
target 5' UUGACUGCAAGACAUCGUAA 3'  
::::::::::::::::::  
query 3' AACUGACGUUCUGUAGCGUU 5'  
query=miR775, target=R03G\_07273, score=1, range=103-122, strand=1  
target 5' UUAACUGCAAGACAUCGCAA 3'  
:: ::::::::::::::  
query 3' AACUGACGUUCUGUAGCGUU 5'  
query=miR775, target=R03G\_09656, score=1.5, range=103-122, strand  
target 5' UUGGCUGCAAGGCAUCGCAA 3'  
:::: ::::::::::::::  
query 3' AACUGACGUUCUGUAGCGUU 5'  
query=miR775, target=R03G\_04104, score=2, range=103-122, strand=1  
target 5' UUGACUGCAAGGCAUCGUAA 3'  
::::::::::::::::::  
query 3' AACUGACGUUCUGUAGCGUU 5'  
query=miR775, target=R03G\_04110, score=2, range=103-122, strand=1  
target 5' UUGACUGCAAGGCAUCGUAA 3'  
::::::::::::::::::  
query 3' AACUGACGUUCUGUAGCGUU 5'  
query=miR775, target=R03G\_08301, score=2, range=331-350, strand=1  
target 5' UUGACUGCAAGACACCGCAA 3'

query 3' AACUGACGUUCUGUAGCGUU 5'  
query=miR775, target=R03G\_16429, score=2, range=118-137, strand=1  
target 5' UUGACUGCAAGACACCGCAA 3'

query 3' AACUGACGUUCUGUAGCGUU 5'  
query=miR775, target=R03G\_02348, score=2, range=118-137, strand=1  
target 5' UUGACUGCAAGACACCGCAA 3'

query 3' AACUGACGUUCUGUAGCGUU 5'  
query=miR775, target=R03G\_13903, score=2, range=406-425, strand=1  
target 5' UUGACUGCAAGACACCGCAA 3'

query 3' AACUGACGUUCUGUAGCGUU 5'  
query=miR775, target=R03G\_14722, score=2, range=406-425, strand=1  
target 5' UUGACUGCAAGACACCGCAA 3'

query 3' AACUGACGUUCUGUAGCGUU 5'  
query=miR775, target=R03G\_08906, score=2, range=406-425, strand=1  
target 5' UUGACUGCAAGACACCGCAA 3'

query 3' AACUGACGUUCUGUAGCGUU 5'  
query=miR775, target=R03G\_13664, score=2, range=406-425, strand=1  
target 5' UUGACUGCAAGACACCGCAA 3'

query 3' AACUGACGUUCUGUAGCGUU 5'  
query=miR775, target=R03G\_05133, score=2, range=355-374, strand=1  
target 5' UUGACUGCAAGACACCGCAA 3'

query 3' AACUGACGUUCUGUAGCGUU 5'  
query=miR775, target=R03G\_05303, score=2, range=406-425, strand=1  
target 5' UUGACUGCAAGACACCGCAA 3'

query 3' AACUGACGUUCUGUAGCGUU 5'  
query=miR775, target=R03G\_05181, score=2, range=406-425, strand=1  
target 5' UUGACUGCAAGACACCGCAA 3'

query 3' AACUGACGUUCUGUAGCGUU 5'  
query=miR775, target=R03G\_05194, score=2, range=406-425, strand=1  
target 5' UUGACUGCAAGACACCGCAA 3'

query 3' AACUGACGUUCUGUAGCGUU 5'  
query=miR775, target=R03G\_13672, score=2, range=406-425, strand=1  
target 5' UUGACUGCAAGACACCGCAA 3'

```

query 3' AACUGACGUUCUGUAGCGUU 5'
query=miR775, target=R03G_02354, score=2, range=406-425, strand=1
target 5' UUGACUGCAAGACACCGCAA 3'
.....
query 3' AACUGACGUUCUGUAGCGUU 5'
query=miR775, target=R03G_07580, score=2, range=130-149, strand=1
target 5' UUGACUGCAAGACACCGCAA 3'
.....
query 3' AACUGACGUUCUGUAGCGUU 5'
query=miR775, target=R03G_11567, score=2, range=1258-1277, strand
target 5' UUGACUGCAAGACACCGCAA 3'
.....
query 3' AACUGACGUUCUGUAGCGUU 5'
query=miR775, target=R03G_07788, score=2, range=355-374, strand=1
target 5' UUGACUGCAAGACACCGCAA 3'
.....
query 3' AACUGACGUUCUGUAGCGUU 5'
query=miR775, target=R03G_01636, score=2, range=355-374, strand=1
target 5' UUGACUGCAAGACACCGCAA 3'
.....
query 3' AACUGACGUUCUGUAGCGUU 5'
query=miR775, target=R03G_01545, score=2, range=370-389, strand=1
target 5' UUGACUGCAAGACACCGCAA 3'
.....
query 3' AACUGACGUUCUGUAGCGUU 5'
query=miR775, target=R03G_14467, score=3, range=103-122, strand=1
target 5' UUGACUGCAAGGCACCGCAA 3'
.....
query 3' AACUGACGUUCUGUAGCGUU 5'
query=miR775, target=R03G_14806, score=3, range=313-332, strand=1
target 5' UUGACUGCAAGACGCCGCAA 3'
.....
query 3' AACUGACGUUCUGUAGCGUU 5'
query=miR775, target=R03G_07438, score=3, range=103-122, strand=1
target 5' UUGACUGCAAGGCACCGCAA 3'
.....
query 3' AACUGACGUUCUGUAGCGUU 5'
query=miR775, target=R03G_09279, score=3, range=172-191, strand=1
target 5' CUGACUGCAAGACACCGCAA 3'
.....
query 3' AACUGACGUUCUGUAGCGUU 5'
query=miR775, target=R03G_14365, score=3, range=298-317, strand=1
target 5' UUGACCGCAAGACACCGCAA 3'
.....
query 3' AACUGACGUUCUGUAGCGUU 5'

```



target 5' UUGAACGCAUGACAUCGCAA 3'  
:::: :::: :::::  
query 3' AACUGACGUUCUGUAGCGUU 5'  
query=miR167d, target=R03G\_13498, score=3, range=394-414, strand=  
target 5' GGAUCCGUGUUGGCAGCUUCA 3'  
.:::: :::::  
query 3' UCUA-GUACGACCGUCGAAGU 5'  
query=miR167d, target=R03G\_02881, score=3, range=10143-10163,  
strand=-1  
target 5' AGAUA AUGGCUGGCAGCUUCC 3'  
:::: :::::  
query 3' UCUAGUA-CGACCGUCGAAGU 5'  
query=miR167d, target=R03G\_16597, score=3.5, range=342-361, stran  
target 5' GGGUCAUGCUGGCCGCUUCG 3'  
.:::: :::::  
query 3' UCUAGUACGACCGUCGAAGU 5'  
query=miR167d, target=R03G\_01139, score=4, range=492-510, strand=  
target 5' GGAU-AUGCUGGCUGCUUCG 3'  
.:::: :::::  
query 3' UCUAGUACGACCGUCGAAGU 5'  
query=miR167d, target=R03G\_02577, score=4, range=573-591, strand=  
target 5' UGA-CUUGCUGGCAGUUUCA 3'  
:: : :::::  
query 3' UCUAGUACGACCGUCGAAGU 5'  
query=miR5678, target=R03G\_05622, score=0, range=475-494, strand=  
target 5' GGAAAGUCUUAUGCAUGGAA 3'  
:::: :::::  
query 3' CCUUUCAGAAUACGUACCUU 5'  
query=miR5678, target=R03G\_08846, score=0, range=475-494, strand=  
target 5' GGAAAGUCUUAUGCAUGGAA 3'  
:::: :::::  
query 3' CCUUUCAGAAUACGUACCUU 5'  
query=miR5678, target=R03G\_13848, score=0, range=475-494, strand=  
target 5' GGAAAGUCUUAUGCAUGGAA 3'  
:::: :::::  
query 3' CCUUUCAGAAUACGUACCUU 5'  
query=miR5678, target=R03G\_05635, score=0, range=475-494, strand=  
target 5' GGAAAGUCUUAUGCAUGGAA 3'  
:::: :::::  
query 3' CCUUUCAGAAUACGUACCUU 5'  
query=miR5678, target=R03G\_03571, score=0, range=475-494, strand=  
target 5' GGAAAGUCUUAUGCAUGGAA 3'  
:::: :::::  
query 3' CCUUUCAGAAUACGUACCUU 5'  
query=miR5678, target=R03G\_01652, score=0, range=475-494, strand=

target 5' GGAAAGUCUUAUGCAUGGAA 3'  
:~::~:  
query 3' CCUUUCAGAAUACGUACCUU 5'  
query=miR5678, target=R03G\_09607, score=0, range=475-494, strand=  
target 5' GGAAAGUCUUAUGCAUGGAA 3'  
:~::~:  
query 3' CCUUUCAGAAUACGUACCUU 5'  
query=miR5678, target=R03G\_11401, score=0.5, range=475-494, stran  
target 5' GGGAAGUCUUAUGCAUGGAA 3'  
:~::~:  
query 3' CCUUUCAGAAUACGUACCUU 5'  
query=miR5678, target=R03G\_09483, score=0.5, range=475-494, stran  
target 5' GGGAAGUCUUAUGCAUGGAA 3'  
:~::~:  
query 3' CCUUUCAGAAUACGUACCUU 5'  
query=miR5678, target=R03G\_00681, score=0.5, range=475-494, stran  
target 5' GGGAAGUCUUAUGCAUGGAA 3'  
:~::~:  
query 3' CCUUUCAGAAUACGUACCUU 5'  
query=miR5678, target=R03G\_09499, score=0.5, range=475-494, stran  
target 5' GGGAAGUCUUAUGCAUGGAA 3'  
:~::~:  
query 3' CCUUUCAGAAUACGUACCUU 5'  
query=miR5678, target=R03G\_07303, score=0.5, range=475-494, stran  
target 5' GGGAAGUCUUAUGCAUGGAA 3'  
:~::~:  
query 3' CCUUUCAGAAUACGUACCUU 5'  
query=miR5678, target=R03G\_09544, score=0.5, range=475-494, stran  
target 5' GGGAAGUCUUAUGCAUGGAA 3'  
:~::~:  
query 3' CCUUUCAGAAUACGUACCUU 5'  
query=miR5678, target=R03G\_07875, score=0.5, range=475-494, stran  
target 5' GGGAAGUCUUAUGCAUGGAA 3'  
:~::~:  
query 3' CCUUUCAGAAUACGUACCUU 5'  
query=miR5678, target=R03G\_05336, score=0.5, range=475-494, stran  
target 5' GGGAAGUCUUAUGCAUGGAA 3'  
:~::~:  
query 3' CCUUUCAGAAUACGUACCUU 5'  
query=miR5678, target=R03G\_17382, score=0.5, range=475-494, stran  
target 5' GGGAAGUCUUAUGCAUGGAA 3'  
:~::~:  
query 3' CCUUUCAGAAUACGUACCUU 5'  
query=miR5678, target=R03G\_06423, score=0.5, range=529-548, stran  
target 5' GGGAAGUCUUAUGCAUGGAA 3'

.....  
query 3' CCUUUCAGAAUACGUACCUU 5'  
query=miR5678, target=R03G\_16807, score=0.5, range=475-494, stran  
target 5' GGAAGUCUUAUGCAUGGAA 3'  
.....  
query 3' CCUUUCAGAAUACGUACCUU 5'  
query=miR5678, target=R03G\_02689, score=0.5, range=475-494, stran  
target 5' GGAAGUCUUAUGCAUGGAA 3'  
.....  
query 3' CCUUUCAGAAUACGUACCUU 5'  
query=miR5678, target=R03G\_10732, score=0.5, range=475-494, stran  
target 5' GGAAGUCUUAUGCAUGGAA 3'  
.....  
query 3' CCUUUCAGAAUACGUACCUU 5'  
query=miR5678, target=R03G\_14359, score=0.5, range=475-494, stran  
target 5' GGAAGUCUUAUGCAUGGAA 3'  
.....  
query 3' CCUUUCAGAAUACGUACCUU 5'  
query=miR5678, target=R03G\_06441, score=0.5, range=475-494, stran  
target 5' GGAAGUCUUAUGCAUGGAA 3'  
.....  
query 3' CCUUUCAGAAUACGUACCUU 5'  
query=miR5678, target=R03G\_15675, score=0.5, range=475-494, stran  
target 5' GGAAGUCUUAUGCAUGGAA 3'  
.....  
query 3' CCUUUCAGAAUACGUACCUU 5'  
query=miR5678, target=R03G\_10235, score=0.5, range=475-494, stran  
target 5' GGAAGUCUUAUGCAUGGAA 3'  
.....  
query 3' CCUUUCAGAAUACGUACCUU 5'  
query=miR5678, target=R03G\_17400, score=0.5, range=349-368, stran  
target 5' GGAAGUCUUAUGCAUGGAA 3'  
.....  
query 3' CCUUUCAGAAUACGUACCUU 5'  
query=miR5678, target=R03G\_01730, score=0.5, range=475-494, stran  
target 5' GGAAGUCUUAUGCAUGGAA 3'  
.....  
query 3' CCUUUCAGAAUACGUACCUU 5'  
query=miR5678, target=R03G\_05915, score=0.5, range=475-494, stran  
target 5' GGAAGUCUUAUGCAUGGAA 3'  
.....  
query 3' CCUUUCAGAAUACGUACCUU 5'  
query=miR5678, target=R03G\_01322, score=0.5, range=361-380, stran  
target 5' GGAAGUCUUAUGCAUGGAA 3'  
.....

query 3' CCUUUCAGAAUACGUACCUU 5'  
query=miR5678, target=R03G\_13720, score=0.5, range=352-371, stran  
target 5' GGGAAGUCUUAUGCAUGGAA 3'  
.....  
query 3' CCUUUCAGAAUACGUACCUU 5'  
query=miR5678, target=R03G\_13742, score=1, range=475-494, strand=  
target 5' GGAAAGUCUUAUGUAUGGAA 3'  
.....  
query 3' CCUUUCAGAAUACGUACCUU 5'  
query=miR5678, target=R03G\_12071, score=1, range=106-125, strand=  
target 5' GGAAAGGCUUAUGCAUGGAA 3'  
.....  
query 3' CCUUUCAGAAUACGUACCUU 5'  
query=miR5678, target=R03G\_01188, score=1, range=343-362, strand=  
target 5' GGAAAGGCUUAUGCAUGGAA 3'  
.....  
query 3' CCUUUCAGAAUACGUACCUU 5'  
query=miR5678, target=R03G\_07129, score=1, range=343-362, strand=  
target 5' GGAAAGGCUUAUGCAUGGAA 3'  
.....  
query 3' CCUUUCAGAAUACGUACCUU 5'  
query=miR5678, target=R03G\_16555, score=1, range=475-494, strand=  
target 5' GGAAAAUCUUAUGCAUGGAA 3'  
.....  
query 3' CCUUUCAGAAUACGUACCUU 5'  
query=miR5678, target=R03G\_16551, score=1, range=475-494, strand=  
target 5' GGAAAAUCUUAUGCAUGGAA 3'  
.....  
query 3' CCUUUCAGAAUACGUACCUU 5'  
query=miR5678, target=R03G\_11773, score=1, range=475-494, strand=  
target 5' GGAAAAUCUUAUGCAUGGAA 3'  
.....  
query 3' CCUUUCAGAAUACGUACCUU 5'  
query=miR5678, target=R03G\_04787, score=1, range=475-494, strand=  
target 5' GGAAAGGCUUAUGCAUGGAA 3'  
.....  
query 3' CCUUUCAGAAUACGUACCUU 5'  
query=miR5678, target=R03G\_10770, score=1, range=475-494, strand=  
target 5' GGAAAGGCUUAUGCAUGGAA 3'  
.....  
query 3' CCUUUCAGAAUACGUACCUU 5'  
query=miR5678, target=R03G\_02822, score=1, range=475-494, strand=  
target 5' GGAAAGGCUUAUGCAUGGAA 3'  
.....  
query 3' CCUUUCAGAAUACGUACCUU 5'







:: :: .:::::::::::  
query 3' CCUUUCAGAAUACGUACCUU 5'  
query=miR5678, target=R03G\_00688, score=3, range=475-494, strand=  
target 5' GGUAAGGUUUUAUGCAUGGAA 3'  
:: :: .:::::::::::  
query 3' CCUUUCAGAAUACGUACCUU 5'  
query=miR5678, target=R03G\_12659, score=3, range=64-83, strand=1  
target 5' GGUAAGCUUUUAUGCAUGGAA 3'  
:: :: .:::::::::::  
query 3' CCUUUCAGAAUACGUACCUU 5'  
query=miR5678, target=R03G\_00679, score=3, range=667-686, strand=  
target 5' GGUAAGGUUUUAUGCAUGGAA 3'  
:: :: .:::::::::::  
query 3' CCUUUCAGAAUACGUACCUU 5'  
query=miR5678, target=R03G\_13919, score=3, range=667-686, strand=  
target 5' GGUAAGCUUUUAUGCAUGGAA 3'  
:: :: .:::::::::::  
query 3' CCUUUCAGAAUACGUACCUU 5'  
query=miR5678, target=R03G\_13286, score=3, range=667-686, strand=  
target 5' GGUAAGGUUUUAUGCAUGGAA 3'  
:: :: .:::::::::::  
query 3' CCUUUCAGAAUACGUACCUU 5'  
query=miR5678, target=R03G\_03624, score=3, range=475-494, strand=  
target 5' GGUAAGCUUUUAUGCAUGGAA 3'  
:: :: .:::::::::::  
query 3' CCUUUCAGAAUACGUACCUU 5'  
query=miR5678, target=R03G\_03602, score=3, range=616-635, strand=  
target 5' GGUAAGGUUUUAUGCAUGGAA 3'  
:: :: .:::::::::::  
query 3' CCUUUCAGAAUACGUACCUU 5'  
query=miR5678, target=R03G\_00284, score=3, range=484-503, strand=  
target 5' GGUAAGCUUUUAUGCAUGGAA 3'  
:: :: .:::::::::::  
query 3' CCUUUCAGAAUACGUACCUU 5'  
query=miR5678, target=R03G\_17408, score=3, range=475-494, strand=  
target 5' GGUAAGGUUUUAUGCAUGGAA 3'  
:: :: .:::::::::::  
query 3' CCUUUCAGAAUACGUACCUU 5'  
query=miR5678, target=R03G\_12678, score=3, range=667-686, strand=  
target 5' GGUAAGGUUUUAUGCAUGGAA 3'  
:: :: .:::::::::::  
query 3' CCUUUCAGAAUACGUACCUU 5'  
query=miR5678, target=R03G\_10763, score=3, range=475-494, strand=  
target 5' GGUAAGCUUUUAUGCAUGGAA 3'  
:: :: .:::::::::::

query 3' CCUUUCAGAAUACGUACCUU 5'  
query=miR5678, target=R03G\_08115, score=3, range=179-197, strand=  
target 5' CUAAG-CUUAUGCAUGGAA 3'  
:::: ::::::::::::::  
query 3' CCUUUCAGAAUACGUACCUU 5'  
query=miR5678, target=R03G\_11281, score=4, range=429-449, strand=  
target 5' UGAUAAGGUUUAUGCAUGGAA 3'  
:: :: .::::::::::::  
query 3' CCU-UUCAGAAUACGUACCUU 5'  
query=miR5678, target=R03G\_02063, score=4, range=352-370, strand=  
target 5' GAAAAGUUUUAUG-AUGGAA 3'  
: :::::::::::::: ::::::  
query 3' CCUUUCAGAAUACGUACCUU 5'  
query=miR476, target=R03G\_17462, score=0, range=231-250, strand=-  
target 5' GACCUUGAAAGAAGGAUCCA 3'  
::::::::::::::::::::  
query 3' CUGGAACUUUCUCCUAGGU 5'  
query=miR476, target=R03G\_13914, score=0, range=99-118, strand=-1  
target 5' GACCUUGAAAGAAGGAUCCA 3'  
::::::::::::::::::::  
query 3' CUGGAACUUUCUCCUAGGU 5'  
query=miR476, target=R03G\_12058, score=0, range=99-118, strand=-1  
target 5' GACCUUGAAAGAAGGAUCCA 3'  
::::::::::::::::::::  
query 3' CUGGAACUUUCUCCUAGGU 5'  
query=miR476, target=R03G\_03751, score=0, range=93-112, strand=-1  
target 5' GACCUUGAAAGAAGGAUCCA 3'  
::::::::::::::::::::  
query 3' CUGGAACUUUCUCCUAGGU 5'  
query=miR476, target=R03G\_05618, score=0, range=93-112, strand=-1  
target 5' GACCUUGAAAGAAGGAUCCA 3'  
::::::::::::::::::::  
query 3' CUGGAACUUUCUCCUAGGU 5'  
query=miR476, target=R03G\_17452, score=0, range=99-118, strand=-1  
target 5' GACCUUGAAAGAAGGAUCCA 3'  
::::::::::::::::::::  
query 3' CUGGAACUUUCUCCUAGGU 5'  
query=miR476, target=R03G\_09195, score=0, range=99-118, strand=-1  
target 5' GACCUUGAAAGAAGGAUCCA 3'  
::::::::::::::::::::  
query 3' CUGGAACUUUCUCCUAGGU 5'  
query=miR476, target=R03G\_13864, score=0, range=99-118, strand=-1  
target 5' GACCUUGAAAGAAGGAUCCA 3'  
::::::::::::::::::::  
query 3' CUGGAACUUUCUCCUAGGU 5'

query=miR476, target=R03G\_16821, score=0, range=99-118, strand=-1  
target 5' GACCUUGAAAGAAGGAUCCA 3'  
::::::::::::::::::::  
query 3' CUGGAACUUUCUCCUAGGU 5'  
query=miR476, target=R03G\_01930, score=0, range=99-118, strand=-1  
target 5' GACCUUGAAAGAAGGAUCCA 3'  
::::::::::::::::::::  
query 3' CUGGAACUUUCUCCUAGGU 5'  
query=miR476, target=R03G\_09921, score=0, range=99-118, strand=-1  
target 5' GACCUUGAAAGAAGGAUCCA 3'  
::::::::::::::::::::  
query 3' CUGGAACUUUCUCCUAGGU 5'  
query=miR476, target=R03G\_16687, score=0, range=99-118, strand=-1  
target 5' GACCUUGAAAGAAGGAUCCA 3'  
::::::::::::::::::::  
query 3' CUGGAACUUUCUCCUAGGU 5'  
query=miR476, target=R03G\_14357, score=0, range=99-118, strand=-1  
target 5' GACCUUGAAAGAAGGAUCCA 3'  
::::::::::::::::::::  
query 3' CUGGAACUUUCUCCUAGGU 5'  
query=miR476, target=R03G\_13719, score=0, range=99-118, strand=-1  
target 5' GACCUUGAAAGAAGGAUCCA 3'  
::::::::::::::::::::  
query 3' CUGGAACUUUCUCCUAGGU 5'  
query=miR476, target=R03G\_17169, score=0, range=99-118, strand=-1  
target 5' GACCUUGAAAGAAGGAUCCA 3'  
::::::::::::::::::::  
query 3' CUGGAACUUUCUCCUAGGU 5'  
query=miR476, target=R03G\_04204, score=0, range=99-118, strand=-1  
target 5' GACCUUGAAAGAAGGAUCCA 3'  
::::::::::::::::::::  
query 3' CUGGAACUUUCUCCUAGGU 5'  
query=miR476, target=R03G\_04699, score=0, range=99-118, strand=-1  
target 5' GACCUUGAAAGAAGGAUCCA 3'  
::::::::::::::::::::  
query 3' CUGGAACUUUCUCCUAGGU 5'  
query=miR476, target=R03G\_10046, score=0, range=99-118, strand=-1  
target 5' GACCUUGAAAGAAGGAUCCA 3'  
::::::::::::::::::::  
query 3' CUGGAACUUUCUCCUAGGU 5'  
query=miR476, target=R03G\_07674, score=0, range=99-118, strand=-1  
target 5' GACCUUGAAAGAAGGAUCCA 3'  
::::::::::::::::::::  
query 3' CUGGAACUUUCUCCUAGGU 5'  
query=miR476, target=R03G\_02837, score=0, range=99-118, strand=-1





target 5' GCCAUUACAAUUUGUUCAAGGG 3'  
::: :: :.....  
query 3' CGGGAA-GUUAACAAGUUCUU 5'  
query=miR8610.2, target=R03G\_11579, score=4, range=5512-5532, str  
target 5' AUUAUCCAAUUUGUUCAAGAA 3'  
.. : :.....  
query 3' CGGGAAGUUAAACAAGUUCUU 5'  
query=miR8610.2, target=R03G\_03165, score=4, range=1036-1056, str  
target 5' GCACCUCAAUAUGUUCAAGAA 3'  
:: : :.....  
query 3' CGGGAAGUUAAACAAGUUCUU 5'  
query=miR8610.2, target=R03G\_03206, score=4, range=449-469, stran  
target 5' UCUUUCAAUUUGUUCAAGAA 3'  
:..... :.....  
query 3' CGGGAAGUUAAACAAGUUCUU 5'  
query=miR8610.2, target=R03G\_15328, score=4, range=173-192, stran  
target 5' UUUCUUC-AUUUGUUCAAGGA 3'  
:..... :.....  
query 3' CGGGAAGUUAAACAAGUUCUU 5'  
query=miR8610.2, target=R03G\_10956, score=4, range=1432-1451,  
strand=-1  
target 5' AUUCUU-AAUUUGUUCAAGAU 3'  
:..... :.....  
query 3' CGGGAAGUUAAACAAGUUCUU 5'  
query=miR8610.2, target=R03G\_08417, score=4, range=107-126, stran  
target 5' GCCCUCAA-UUGUUCAUGAA 3'  
:..... :..... :..  
query 3' CGGGAAGUUAAACAAGUUCUU 5'  
query=miR5261, target=R03G\_07863, score=0, range=932-952, strand=  
target 5' AGACCAAAGCAUCUGACAUGA 3'  
:..... :.....  
query 3' UCUGGUUUCGUAGACUGUACU 5'  
query=miR5261, target=R03G\_17254, score=0, range=932-952, strand=  
target 5' AGACCAAAGCAUCUGACAUGA 3'  
:..... :.....  
query 3' UCUGGUUUCGUAGACUGUACU 5'  
query=miR5261, target=R03G\_10748, score=0, range=932-952, strand=  
target 5' AGACCAAAGCAUCUGACAUGA 3'  
:..... :.....  
query 3' UCUGGUUUCGUAGACUGUACU 5'  
query=miR5261, target=R03G\_07861, score=0, range=932-952, strand=  
target 5' AGACCAAAGCAUCUGACAUGA 3'  
:..... :.....  
query 3' UCUGGUUUCGUAGACUGUACU 5'  
query=miR5261, target=R03G\_17201, score=0, range=929-949, strand=





query 3' UCUGGUUUCGUAGACUGUACU 5'  
query=miR5261, target=R03G\_17220, score=4, range=938-958, strand=  
target 5' AGACCAAAGCAUCCGACAUA 3'  
query 3' UCUGGUUUCGUAGACUGUACU 5'  
query=miR5261, target=R03G\_12967, score=4, range=932-952, strand=  
target 5' AGACCAAAGCAUCCGACAUA 3'  
query 3' UCUGGUUUCGUAGACUGUACU 5'  
query=miR5261, target=R03G\_14562, score=4, range=869-889, strand=  
target 5' AGACCAAAGCAUCCGACAUA 3'  
query 3' UCUGGUUUCGUAGACUGUACU 5'  
query=miR5261, target=R03G\_16583, score=4, range=56-76, strand=-1  
target 5' AGACAACAGUAUCUGACGUGA 3'  
query 3' UCUGGUUUCGUAGACUGUACU 5'  
query=miR8658, target=R03G\_08999, score=3, range=415-435, strand=  
target 5' AUGGUCUCUAUGCUUUGUCA 3'  
query 3' UACCAGAGACAUGAAACAGUU 5'  
query=miR8658, target=R03G\_17168, score=3, range=967-987, strand=  
target 5' ACGGUCUCUGUUCUUGUCA 3'  
query 3' UACCAGAGACAUGAAACAGUU 5'  
query=miR8658, target=R03G\_01279, score=3.5, range=52-72, strand=  
target 5' AUGGUCCUUGUUCUUGUCA 3'  
query 3' UACCAGAGACAUGAAACAGUU 5'  
query=miR8658, target=R03G\_12321, score=3.5, range=203-222, stran  
target 5' AAGGU-UUUGUAUUUUGUCA 3'  
query 3' UACCAGAGACAUGAAACAGUU 5'  
query=miR8658, target=R03G\_08552, score=4, range=1163-1183, stran  
target 5' AUGCUCUCUGUGUUUUGUCAC 3'  
query 3' UACCAGAGACAUGAAACAGUU 5'  
query=miR8658, target=R03G\_03092, score=4, range=1163-1183, stran  
target 5' AUGCUCUCUGUGUUUUGUCAC 3'  
query 3' UACCAGAGACAUGAAACAGUU 5'  
query=miR8658, target=R03G\_10756, score=4, range=32-51, strand=1  
target 5' GUGG-CUUUGUACUUUGCAA 3'



query=miR2111, target=R03G\_15290, score=0, range=167-186, strand=  
target 5' CCAAACCCAAACACAGUUUA 3'  
.....  
query 3' GGUUUGGGUUUGUGUCAAAU 5'  
query=miR2111, target=R03G\_09087, score=0.5, range=239-258, stran  
target 5' UCAAACCCAAACACAGUUUA 3'  
. ....  
query 3' GGUUUGGGUUUGUGUCAAAU 5'  
query=miR2111, target=R03G\_10657, score=0.5, range=239-258, stran  
target 5' CCAAGCCCAAACACAGUUUA 3'  
.....  
query 3' GGUUUGGGUUUGUGUCAAAU 5'  
query=miR2111, target=R03G\_12685, score=1, range=221-240, strand=  
target 5' CCAAACCCAAACAUGUUUA 3'  
.....  
query 3' GGUUUGGGUUUGUGUCAAAU 5'  
query=miR2111, target=R03G\_12243, score=1, range=239-258, strand=  
target 5' CCAAACCCAAACAUGUUUA 3'  
.....  
query 3' GGUUUGGGUUUGUGUCAAAU 5'  
query=miR2111, target=R03G\_13307, score=1, range=200-219, strand=  
target 5' CCCAACCCAAACACAGUUUA 3'  
:: .....  
query 3' GGUUUGGGUUUGUGUCAAAU 5'  
query=miR2111, target=R03G\_08447, score=1, range=239-258, strand=  
target 5' CCAAAACCAAACACAGUUUA 3'  
.....  
query 3' GGUUUGGGUUUGUGUCAAAU 5'  
query=miR2111, target=R03G\_03971, score=1.5, range=239-258, stran  
target 5' UCAAACCCAAGCACAGUUUA 3'  
. ....  
query 3' GGUUUGGGUUUGUGUCAAAU 5'  
query=miR2111, target=R03G\_13022, score=1.5, range=239-258, stran  
target 5' UCAAACCCAAGCACAGUUUA 3'  
.....  
query 3' GGUUUGGGUUUGUGUCAAAU 5'  
query=miR2111, target=R03G\_11292, score=2.5, range=3295-3314, str  
target 5' ACAAUACAAACACAGUUUA 3'  
.....  
query 3' GGUUUGGGUUUGUGUCAAAU 5'  
query=miR2111, target=R03G\_10368, score=3, range=8704-8723, stran  
target 5' GCAAACGCAAACACAGUUUU 3'  
.....  
query 3' GGUUUGGGUUUGUGUCAAAU 5'  
query=miR2111, target=R03G\_05178, score=3.5, range=431-449, stran

target 5' UUAAA-UCAAACGCAGUUUA 3'  
.....  
query 3' GGUUUGGGUUUGUGUCAAAU 5'  
query=miR2111, target=R03G\_04030, score=3.5, range=740-760, stran  
target 5' CCAUACUCAAACACAGUUUC 3'  
::: :: .....  
query 3' GGUUUG-GGUUUGUGUCAAAU 5'  
query=miR2111, target=R03G\_05582, score=3.5, range=271-289, stran  
target 5' CUAAA-CCAAACAGAGUUUA 3'  
:..... :.....  
query 3' GGUUUGGGUUUGUGUCAAAU 5'  
query=miR2111, target=R03G\_00850, score=4, range=165-184, strand=  
target 5' UCCAACUCAACCACAGUUUA 3'  
. : ..... :.....  
query 3' GGUUUGGGUUUGUGUCAAAU 5'  
query=miR2111, target=R03G\_08461, score=4, range=423-443, strand=  
target 5' UCAAUCACAAACACAGGUUA 3'  
. : ..... :.....  
query 3' GGUUUGG-GUUUGUGUCAAAU 5'  
query=miR2111, target=R03G\_10271, score=4, range=910-929, strand=  
target 5' AUUUAUCCAAACACAGUUUA 3'  
. : .....  
query 3' GGUUUGGGUUUGUGUCAAAU 5'  
query=miR2111, target=R03G\_09085, score=4, range=1804-1822, stran  
target 5' ACAGG-ACAAACACAGUUUA 3'  
:.... :.....  
query 3' GGUUUGGGUUUGUGUCAAAU 5'  
query=miR2111, target=R03G\_00116, score=4, range=453-472, strand=  
target 5' CCAUAGGCAAACACAGUUUC 3'  
::: : .....  
query 3' GGUUUGGGUUUGUGUCAAAU 5'  
query=miR7512, target=R03G\_16107, score=0, range=3015-3036, stran  
target 5' AUGGCAUAAGCUACAAGUAGUA 3'  
:.....  
query 3' UACCGUAUUCGAUGUUCAUCAU 5'  
query=miR7512, target=R03G\_03119, score=0, range=294-315, strand=  
target 5' AUGGCAUAAGCUACAAGUAGUA 3'  
:.....  
query 3' UACCGUAUUCGAUGUUCAUCAU 5'  
query=miR7817a, target=R03G\_12527, score=0, range=4341-4363, stra  
target 5' UUCUCGAGACAAGUUCAACCAAA 3'  
:.....  
query 3' AAGAGCUCUGUUCAAGUUGGUUU 5'  
query=miR7817a, target=R03G\_13918, score=0, range=4341-4363, stra  
target 5' UUCUCGAGACAAGUUCAACCAAA 3'

query 3' AAGAGCUCUGUUCAAGUUGGUUU 5'  
query=miR7817a, target=R03G\_14347, score=0, range=4272-4294, strand  
target 5' UUCUCGAGACAAGUUCAACCAA 3'

query 3' AAGAGCUCUGUUCAAGUUGGUUU 5'  
query=miR7817a, target=R03G\_01614, score=0, range=4182-4204, strand  
target 5' UUCUCGAGACAAGUUCAACCAA 3'

query 3' AAGAGCUCUGUUCAAGUUGGUUU 5'  
query=miR7817a, target=R03G\_16361, score=0, range=4176-4198, strand  
target 5' UUCUCGAGACAAGUUCAACCAA 3'

query 3' AAGAGCUCUGUUCAAGUUGGUUU 5'  
query=miR7817a, target=R03G\_04126, score=0, range=4335-4357, strand  
target 5' UUCUCGAGACAAGUUCAACCAA 3'

query 3' AAGAGCUCUGUUCAAGUUGGUUU 5'  
query=miR7817a, target=R03G\_09493, score=0, range=2889-2911, strand  
target 5' UUCUCGAGACAAGUUCAACCAA 3'

query 3' AAGAGCUCUGUUCAAGUUGGUUU 5'  
query=miR7817a, target=R03G\_17165, score=0, range=717-739, strand  
target 5' UUCUCGAGACAAGUUCAACCAA 3'

query 3' AAGAGCUCUGUUCAAGUUGGUUU 5'  
query=miR7817a, target=R03G\_00298, score=0, range=696-718, strand  
target 5' UUCUCGAGACAAGUUCAACCAA 3'

query 3' AAGAGCUCUGUUCAAGUUGGUUU 5'  
query=miR7817a, target=R03G\_12530, score=0, range=159-181, strand  
target 5' UUCUCGAGACAAGUUCAACCAA 3'

query 3' AAGAGCUCUGUUCAAGUUGGUUU 5'  
query=miR7817a, target=R03G\_03618, score=0, range=159-181, strand  
target 5' UUCUCGAGACAAGUUCAACCAA 3'

query 3' AAGAGCUCUGUUCAAGUUGGUUU 5'  
query=miR7817a, target=R03G\_08831, score=0, range=87-109, strand=  
target 5' UUCUCGAGACAAGUUCAACCAA 3'

query 3' AAGAGCUCUGUUCAAGUUGGUUU 5'  
query=miR7817a, target=R03G\_03765, score=1, range=159-181, strand  
target 5' UUCUCGAGACAAGUUCAAUCAA 3'

query 3' AAGAGCUCUGUUCAAGUUGGUUU 5'  
query=miR7817a, target=R03G\_16693, score=1, range=4341-4363, stra  
target 5' GUCUCGAGACAAGUUCAACCAAA 3'  
.....  
query 3' AAGAGCUCUGUUCAAGUUGGUUU 5'  
query=miR7817a, target=R03G\_16539, score=1, range=4233-4255, stra  
target 5' GUCUCGAGACAAGUUCAACCAAA 3'  
.....  
query 3' AAGAGCUCUGUUCAAGUUGGUUU 5'  
query=miR7817a, target=R03G\_12538, score=1, range=4233-4255, stra  
target 5' CUCUCGAGACAAGUUCAACCAAA 3'  
.....  
query 3' AAGAGCUCUGUUCAAGUUGGUUU 5'  
query=miR7817a, target=R03G\_07311, score=1, range=4182-4204, stra  
target 5' CUCUCGAGACAAGUUCAACCAAA 3'  
.....  
query 3' AAGAGCUCUGUUCAAGUUGGUUU 5'  
query=miR7817a, target=R03G\_10804, score=1, range=4182-4204, stra  
target 5' CUCUCGAGACAAGUUCAACCAAA 3'  
.....  
query 3' AAGAGCUCUGUUCAAGUUGGUUU 5'  
query=miR7817a, target=R03G\_09547, score=1, range=4176-4198, stra  
target 5' CUCUCGAGACAAGUUCAACCAAA 3'  
.....  
query 3' AAGAGCUCUGUUCAAGUUGGUUU 5'  
query=miR7817a, target=R03G\_06425, score=1, range=4176-4198, stra  
target 5' CUCUCGAGACAAGUUCAACCAAA 3'  
.....  
query 3' AAGAGCUCUGUUCAAGUUGGUUU 5'  
query=miR7817a, target=R03G\_17021, score=1, range=4176-4198, stra  
target 5' CUCUCGAGACAAGUUCAACCAAA 3'  
.....  
query 3' AAGAGCUCUGUUCAAGUUGGUUU 5'  
query=miR7817a, target=R03G\_05330, score=1, range=4176-4198, stra  
target 5' CUCUCGAGACAAGUUCAACCAAA 3'  
.....  
query 3' AAGAGCUCUGUUCAAGUUGGUUU 5'  
query=miR7817a, target=R03G\_02704, score=1, range=4176-4198, stra  
target 5' CUCUCGAGACAAGUUCAACCAAA 3'  
.....  
query 3' AAGAGCUCUGUUCAAGUUGGUUU 5'  
query=miR7817a, target=R03G\_12677, score=1, range=4176-4198, stra  
target 5' CUCUCGAGACAAGUUCAACCAAA 3'  
.....  
query 3' AAGAGCUCUGUUCAAGUUGGUUU 5'

query=miR7817a, target=R03G\_04933, score=1, range=4176-4198, strand  
target 5' CUCUCGAGACAAGUUCAACCAAA 3'  
::::::::::::::::::::::::::  
query 3' AAGAGCUCUGUUCAAGUUGGUUU 5'  
query=miR7817a, target=R03G\_05344, score=1, range=4002-4024, strand  
target 5' CUCUCGAGACAAGUUCAACCAAA 3'  
::::::::::::::::::::::::::  
query 3' AAGAGCUCUGUUCAAGUUGGUUU 5'  
query=miR7817a, target=R03G\_03778, score=1, range=4134-4156, strand  
target 5' CUCUCGAGACAAGUUCAACCAAA 3'  
::::::::::::::::::::::::::  
query 3' AAGAGCUCUGUUCAAGUUGGUUU 5'  
query=miR7817a, target=R03G\_12673, score=1, range=3477-3499, strand  
target 5' CUCUCGAGACAAGUUCAACCAAA 3'  
::::::::::::::::::::::::::  
query 3' AAGAGCUCUGUUCAAGUUGGUUU 5'  
query=miR7817a, target=R03G\_17422, score=1, range=3477-3499, strand  
target 5' CUCUCGAGACAAGUUCAACCAAA 3'  
::::::::::::::::::::::::::  
query 3' AAGAGCUCUGUUCAAGUUGGUUU 5'  
query=miR7817a, target=R03G\_01966, score=1, range=1224-1246, strand  
target 5' GUCUCGAGACAAGUUCAACCAAA 3'  
::::::::::::::::::::::::::  
query 3' AAGAGCUCUGUUCAAGUUGGUUU 5'  
query=miR7817a, target=R03G\_08107, score=1, range=699-721, strand  
target 5' GUCUCGAGACAAGUUCAACCAAA 3'  
::::::::::::::::::::::::::  
query 3' AAGAGCUCUGUUCAAGUUGGUUU 5'  
query=miR7817a, target=R03G\_00239, score=1, range=696-718, strand  
target 5' GUCUCGAGACAAGUUCAACCAAA 3'  
::::::::::::::::::::::::::  
query 3' AAGAGCUCUGUUCAAGUUGGUUU 5'  
query=miR7817a, target=R03G\_05514, score=1, range=690-712, strand  
target 5' CUCUCGAGACAAGUUCAACCAAA 3'  
::::::::::::::::::::::::::  
query 3' AAGAGCUCUGUUCAAGUUGGUUU 5'  
query=miR7817a, target=R03G\_11473, score=1, range=159-181, strand  
target 5' GUCUCGAGACAAGUUCAACCAAA 3'  
::::::::::::::::::::::::::  
query 3' AAGAGCUCUGUUCAAGUUGGUUU 5'  
query=miR7817a, target=R03G\_02820, score=1, range=159-181, strand  
target 5' GUCUCGAGACAAGUUCAACCAAA 3'  
::::::::::::::::::::::::::  
query 3' AAGAGCUCUGUUCAAGUUGGUUU 5'  
query=miR7817a, target=R03G\_01937, score=1, range=159-181, strand





query 3' GCUGCAGAGGGAGACGCAU 5'  
query=miR391, target=R03G\_12075, score=0, range=1186-1204, strand  
target 5' CGACGUCUCCCUCUGCGUA 3'

query 3' GCUGCAGAGGGAGACGCAU 5'  
query=miR391, target=R03G\_09927, score=0, range=1186-1204, strand  
target 5' CGACGUCUCCCUCUGCGUA 3'

query 3' GCUGCAGAGGGAGACGCAU 5'  
query=miR391, target=R03G\_14622, score=0, range=244-262, strand=1  
target 5' CGACGUCUCCCUCUGCGUA 3'

query 3' GCUGCAGAGGGAGACGCAU 5'  
query=miR391, target=R03G\_05925, score=0, range=1186-1204, strand  
target 5' CGACGUCUCCCUCUGCGUA 3'

query 3' GCUGCAGAGGGAGACGCAU 5'  
query=miR391, target=R03G\_01720, score=0, range=1171-1189, strand  
target 5' CGACGUCUCCCUCUGCGUA 3'

query 3' GCUGCAGAGGGAGACGCAU 5'  
query=miR391, target=R03G\_10777, score=0, range=2362-2380, strand  
target 5' CGACGUCUCCCUCUGCGUA 3'

query 3' GCUGCAGAGGGAGACGCAU 5'  
query=miR391, target=R03G\_08609, score=0, range=1171-1189, strand  
target 5' CGACGUCUCCCUCUGCGUA 3'

query 3' GCUGCAGAGGGAGACGCAU 5'  
query=miR391, target=R03G\_11279, score=0, range=148-166, strand=1  
target 5' CGACGUCUCCCUCUGCGUA 3'

query 3' GCUGCAGAGGGAGACGCAU 5'  
query=miR391, target=R03G\_13746, score=0, range=40-58, strand=1  
target 5' CGACGUCUCCCUCUGCGUA 3'

query 3' GCUGCAGAGGGAGACGCAU 5'  
query=miR391, target=R03G\_12669, score=0, range=1186-1204, strand  
target 5' CGACGUCUCCCUCUGCGUA 3'

query 3' GCUGCAGAGGGAGACGCAU 5'  
query=miR391, target=R03G\_16708, score=0, range=1186-1204, strand  
target 5' CGACGUCUCCCUCUGCGUA 3'

query 3' GCUGCAGAGGGAGACGCAU 5'  
query=miR391, target=R03G\_05927, score=0, range=1186-1204, strand  
target 5' CGACGUCUCCCUUGCGUA 3'  
.....  
query 3' GCUGCAGAGGGAGACGCAU 5'  
query=miR391, target=R03G\_07869, score=2, range=2431-2449, strand  
target 5' CGACGUCUCCCUUACGUA 3'  
.....  
query 3' GCUGCAGAGGGAGACGCAU 5'  
query=miR391, target=R03G\_05524, score=2, range=1186-1203, strand  
target 5' CGACGUCUCCCUUGC-UA 3'  
.....  
query 3' GCUGCAGAGGGAGACGCAU 5'  
query=miR391, target=R03G\_10122, score=4, range=774-793, strand=1  
target 5' UGAUCUCUCCCUAUGCGUA 3'  
... ..  
query 3' GCUGCAGAGGGAG-ACGCAU 5'  
query=miR391, target=R03G\_12669, score=4, range=1868-1885, strand  
target 5' CGGUGUCUCCCUUG-GUC 3'  
.....  
query 3' GCUGCAGAGGGAGACGCAU 5'  
query=miR391, target=R03G\_02076, score=4, range=156-174, strand=-  
target 5' UGAUUUCUUUCUGCGUA 3'  
... ..  
query 3' GCUGCAGAGGGAGACGCAU 5'  
query=miR391, target=R03G\_12955, score=4, range=208-225, strand=-  
target 5' CGGUGUCUCCCUUG-GUC 3'  
.....  
query 3' GCUGCAGAGGGAGACGCAU 5'  
query=miR399f, target=R03G\_11770, score=0, range=17-36, strand=1  
target 5' CAGGACAAAUCGCGUUGGCA 3'  
.....  
query 3' GUCCUGUUUAGCGCAACCGU 5'  
query=miR399f, target=R03G\_04217, score=0, range=17-36, strand=1  
target 5' CAGGACAAAUCGCGUUGGCA 3'  
.....  
query 3' GUCCUGUUUAGCGCAACCGU 5'  
query=miR399f, target=R03G\_16135, score=0, range=17-36, strand=1  
target 5' CAGGACAAAUCGCGUUGGCA 3'  
.....  
query 3' GUCCUGUUUAGCGCAACCGU 5'  
query=miR399f, target=R03G\_10523, score=0, range=17-36, strand=1  
target 5' CAGGACAAAUCGCGUUGGCA 3'  
.....  
query 3' GUCCUGUUUAGCGCAACCGU 5'

query=miR399f, target=R03G\_01941, score=0, range=17-36, strand=1  
target 5' CAGGACAAAUCGCGUUGGCA 3'  
:~::~  
query 3' GUCCUGUUUAGCGCAACCGU 5'  
query=miR399f, target=R03G\_03105, score=0, range=17-36, strand=1  
target 5' CAGGACAAAUCGCGUUGGCA 3'  
:~::~  
query 3' GUCCUGUUUAGCGCAACCGU 5'  
query=miR399f, target=R03G\_15285, score=0, range=17-36, strand=1  
target 5' CAGGACAAAUCGCGUUGGCA 3'  
:~::~  
query 3' GUCCUGUUUAGCGCAACCGU 5'  
query=miR399f, target=R03G\_09599, score=0, range=17-36, strand=1  
target 5' CAGGACAAAUCGCGUUGGCA 3'  
:~::~  
query 3' GUCCUGUUUAGCGCAACCGU 5'  
query=miR399f, target=R03G\_09932, score=0, range=17-36, strand=1  
target 5' CAGGACAAAUCGCGUUGGCA 3'  
:~::~  
query 3' GUCCUGUUUAGCGCAACCGU 5'  
query=miR399f, target=R03G\_09956, score=2, range=17-36, strand=1  
target 5' CAGGACAAAUCGCGUUAGCA 3'  
:~::~  
query 3' GUCCUGUUUAGCGCAACCGU 5'  
query=miR399f, target=R03G\_15161, score=2, range=17-36, strand=1  
target 5' CAGAACAAAUCGUGUUGGCA 3'  
:~::~  
query 3' GUCCUGUUUAGCGCAACCGU 5'  
query=miR399f, target=R03G\_07726, score=2, range=17-36, strand=1  
target 5' CAGAACAAAUCGUGUUGGCA 3'  
:~::~  
query 3' GUCCUGUUUAGCGCAACCGU 5'  
query=miR399f, target=R03G\_05912, score=3, range=11-30, strand=1  
target 5' CAGGACAAAACGUGUUGGCA 3'  
:~::~  
query 3' GUCCUGUUUAGCGCAACCGU 5'  
query=miR399f, target=R03G\_01715, score=4, range=17-36, strand=1  
target 5' CAGGACAAACCGUGUUGGCU 3'  
:~::~  
query 3' GUCCUGUUUAGCGCAACCGU 5'  
query=miR399f, target=R03G\_15255, score=4, range=17-36, strand=1  
target 5' CAGGACAAACCGUGUUGGCU 3'  
:~::~  
query 3' GUCCUGUUUAGCGCAACCGU 5'  
query=miR399f, target=R03G\_16425, score=4, range=17-36, strand=1





```
target 5' UUCAUU-AGCUUCUUCAUUUCUC 3'
::: :: :
query 3' AAGAAAGUCGAAGAAGUAGAGAU 5'
query=miR5298d, target=R03G_11059, score=4, range=287-308, strand
target 5' UUCCUUC-UCUUCUUCAUCUCUU 3'
::: ::: :
query 3' AAGAAAGUCGAAGAAGUAGAGAU 5'
query=miR5632-3p, target=R03G_07707, score=0, range=1004-1024,
strand=1
target 5' AGUAUCCAGACUAAAUCCAA 3'
:
query 3' UCAUAGGUCUGAAUUUAGGUU 5'
query=miR5632-3p, target=R03G_13919, score=0, range=1004-1024,
strand=1
target 5' AGUAUCCAGACUAAAUCCAA 3'
:
query 3' UCAUAGGUCUGAAUUUAGGUU 5'
query=miR5632-3p, target=R03G_07690, score=0, range=812-832, stra
target 5' AGUAUCCAGACUAAAUCCAA 3'
:
query 3' UCAUAGGUCUGAAUUUAGGUU 5'
query=miR5632-3p, target=R03G_00679, score=1, range=1004-1024,
strand=1
target 5' AGUCUCCAGACUAAAUCCAA 3'
::: :
query 3' UCAUAGGUCUGAAUUUAGGUU 5'
query=miR5632-3p, target=R03G_10550, score=1, range=812-832, stra
target 5' AGUUUCCAGACUAAAUCCAA 3'
::: :
query 3' UCAUAGGUCUGAAUUUAGGUU 5'
query=miR5632-3p, target=R03G_17408, score=1, range=812-832, stra
target 5' AGUCUCCAGACUAAAUCCAA 3'
::: :
query 3' UCAUAGGUCUGAAUUUAGGUU 5'
query=miR5632-3p, target=R03G_11281, score=1, range=767-787, stra
target 5' AGUCUCCAGACUAAAUCCAA 3'
::: :
query 3' UCAUAGGUCUGAAUUUAGGUU 5'
query=miR5632-3p, target=R03G_12166, score=1, range=812-832, stra
target 5' AGUUUCCAGACUAAAUCCAA 3'
::: :
query 3' UCAUAGGUCUGAAUUUAGGUU 5'
query=miR5632-3p, target=R03G_10787, score=1, range=812-832, stra
target 5' AGUCUCCAGACUAAAUCCAA 3'
::: :
```

query 3' UCAUAGGUCUGAAUUUAGGUU 5'  
query=miR5632-3p, target=R03G\_08847, score=1, range=812-832, stra  
target 5' AGUUUCCAGACUAAAUCCAA 3'  
::: ::::::::::::::::::::

query 3' UCAUAGGUCUGAAUUUAGGUU 5'  
query=miR5632-3p, target=R03G\_12659, score=1, range=401-421, stra  
target 5' AGUCUCCAGACUAAAUCCAA 3'  
::: ::::::::::::::::::::

query 3' UCAUAGGUCUGAAUUUAGGUU 5'  
query=miR5632-3p, target=R03G\_00700, score=1, range=251-271, stra  
target 5' AGUCUCCAGACUAAAUCCAA 3'  
::: ::::::::::::::::::::

query 3' UCAUAGGUCUGAAUUUAGGUU 5'  
query=miR5632-3p, target=R03G\_16140, score=1, range=251-271, stra  
target 5' AGUUUCCAGACUAAAUCCAA 3'  
::: ::::::::::::::::::::

query 3' UCAUAGGUCUGAAUUUAGGUU 5'  
query=miR5632-3p, target=R03G\_15582, score=1, range=191-211, stra  
target 5' AGUCUCCAGACUAAAUCCAA 3'  
::: ::::::::::::::::::::

query 3' UCAUAGGUCUGAAUUUAGGUU 5'  
query=miR5632-3p, target=R03G\_13453, score=1, range=191-211, stra  
target 5' AGUCUCCAGACUAAAUCCAA 3'  
::: ::::::::::::::::::::

query 3' UCAUAGGUCUGAAUUUAGGUU 5'  
query=miR5632-3p, target=R03G\_10220, score=1, range=251-271, stra  
target 5' AGUCUCCAGACUAAAUCCAA 3'  
::: ::::::::::::::::::::

query 3' UCAUAGGUCUGAAUUUAGGUU 5'  
query=miR5632-3p, target=R03G\_02846, score=1, range=17-37, strand  
target 5' AGUCUCCAGACUAAAUCCAA 3'  
::: ::::::::::::::::::::

query 3' UCAUAGGUCUGAAUUUAGGUU 5'  
query=miR5632-3p, target=R03G\_03624, score=1.5, range=812-832,  
strand=1  
target 5' AGUCUUCAGACUAAAUCCAA 3'  
::: ::::::::::::::::::::

query 3' UCAUAGGUCUGAAUUUAGGUU 5'  
query=miR5632-3p, target=R03G\_03603, score=1.5, range=251-271,  
strand=1  
target 5' AGUUUUCAGACUAAAUCCAA 3'  
::: ::::::::::::::::::::

query 3' UCAUAGGUCUGAAUUUAGGUU 5'  
query=miR5632-3p, target=R03G\_03112, score=2, range=806-826, stra  
target 5' AGAGUCCGACUAAAUCCAA 3'



```
:: .....
query 3' UCAUAGGUCUGAAUUUAGGUU 5'
query=miR5632-3p, target=R03G_05522, score=2, range=806-826, stra
target 5' AGAGUCCGGACUAAAUCCAA 3'
:: .....
query 3' UCAUAGGUCUGAAUUUAGGUU 5'
query=miR5632-3p, target=R03G_00240, score=2, range=749-769, stra
target 5' AGAGUCCGGACUAAAUCCAA 3'
:: .....
query 3' UCAUAGGUCUGAAUUUAGGUU 5'
query=miR5632-3p, target=R03G_02227, score=2, range=806-826, stra
target 5' AGAGUCCGGACUAAAUCCAA 3'
:: .....
query 3' UCAUAGGUCUGAAUUUAGGUU 5'
query=miR5632-3p, target=R03G_14784, score=2, range=440-460, stra
target 5' AGAGUCCGGACUAAAUCCAA 3'
:: .....
query 3' UCAUAGGUCUGAAUUUAGGUU 5'
query=miR5632-3p, target=R03G_17423, score=2, range=440-460, stra
target 5' AGAGUCCGGACUAAAUCCAA 3'
:: .....
query 3' UCAUAGGUCUGAAUUUAGGUU 5'
query=miR5632-3p, target=R03G_16737, score=2, range=440-460, stra
target 5' AGAGUCCGGACUAAAUCCAA 3'
:: .....
query 3' UCAUAGGUCUGAAUUUAGGUU 5'
query=miR5632-3p, target=R03G_10797, score=2, range=440-460, stra
target 5' AGAGUCCGGACUAAAUCCAA 3'
:: .....
query 3' UCAUAGGUCUGAAUUUAGGUU 5'
query=miR5632-3p, target=R03G_03560, score=2, range=440-460, stra
target 5' AGAGUCCGGACUAAAUCCAA 3'
:: .....
query 3' UCAUAGGUCUGAAUUUAGGUU 5'
query=miR5632-3p, target=R03G_17328, score=2, range=440-460, stra
target 5' AGAGUCCGGACUAAAUCCAA 3'
:: .....
query 3' UCAUAGGUCUGAAUUUAGGUU 5'
query=miR5632-3p, target=R03G_12950, score=2, range=440-460, stra
target 5' AGAGUCCGGACUAAAUCCAA 3'
:: .....
query 3' UCAUAGGUCUGAAUUUAGGUU 5'
query=miR5632-3p, target=R03G_14981, score=2, range=440-460, stra
target 5' AGAGUCCGGACUAAAUCCAA 3'
:: .....
```

query 3' UCAUAGGUCUGAAUUUAGGUU 5'  
query=miR5632-3p, target=R03G\_16124, score=2, range=440-460, str  
target 5' AGAGUCCGGACUUAAAUCCAA 3'  
:: .....  
query 3' UCAUAGGUCUGAAUUUAGGUU 5'  
query=miR5632-3p, target=R03G\_15170, score=2, range=440-460, str  
target 5' AGAGUCCGGACUUAAAUCCAA 3'  
:: .....  
query 3' UCAUAGGUCUGAAUUUAGGUU 5'  
query=miR5632-3p, target=R03G\_10050, score=2, range=440-460, str  
target 5' AGAGUCCGGACUUAAAUCCAA 3'  
:: .....  
query 3' UCAUAGGUCUGAAUUUAGGUU 5'  
query=miR5632-3p, target=R03G\_15145, score=2, range=440-460, str  
target 5' AGAGUCCGGACUUAAAUCCAA 3'  
:: .....  
query 3' UCAUAGGUCUGAAUUUAGGUU 5'  
query=miR5632-3p, target=R03G\_13752, score=2, range=440-460, str  
target 5' AGAGUCCGGACUUAAAUCCAA 3'  
:: .....  
query 3' UCAUAGGUCUGAAUUUAGGUU 5'  
query=miR5632-3p, target=R03G\_03791, score=2, range=440-460, str  
target 5' AGAGUCCGGACUUAAAUCCAA 3'  
:: .....  
query 3' UCAUAGGUCUGAAUUUAGGUU 5'  
query=miR5632-3p, target=R03G\_07723, score=2, range=440-460, str  
target 5' AGAGUCCGGACUUAAAUCCAA 3'  
:: .....  
query 3' UCAUAGGUCUGAAUUUAGGUU 5'  
query=miR5632-3p, target=R03G\_17092, score=2, range=440-460, str  
target 5' AGAGUCCGGACUUAAAUCCAA 3'  
:: .....  
query 3' UCAUAGGUCUGAAUUUAGGUU 5'  
query=miR5632-3p, target=R03G\_16141, score=2, range=440-460, str  
target 5' AGAGUCCGGACUUAAAUCCAA 3'  
:: .....  
query 3' UCAUAGGUCUGAAUUUAGGUU 5'  
query=miR5632-3p, target=R03G\_16541, score=2, range=440-460, str  
target 5' AGAGUCCGGACUUAAAUCCAA 3'  
:: .....  
query 3' UCAUAGGUCUGAAUUUAGGUU 5'  
query=miR5632-3p, target=R03G\_11536, score=2, range=440-460, str  
target 5' AGAGUCCGGACUUAAAUCCAA 3'  
:: .....  
query 3' UCAUAGGUCUGAAUUUAGGUU 5'

query=miR5632-3p, target=R03G\_15286, score=2, range=440-460, strand=1  
target 5' AGAGUCCGGACUUAAAUCCAA 3'  
:: .....  
query 3' UCAUAGGUCUGAAUUUAGGUU 5'  
query=miR5632-3p, target=R03G\_09926, score=2, range=440-460, strand=1  
target 5' AGAGUCCGGACUUAAAUCCAA 3'  
:: .....  
query 3' UCAUAGGUCUGAAUUUAGGUU 5'  
query=miR5632-3p, target=R03G\_05516, score=2, range=440-460, strand=1  
target 5' AGAGUCCGGACUUAAAUCCAA 3'  
:: .....  
query 3' UCAUAGGUCUGAAUUUAGGUU 5'  
query=miR5632-3p, target=R03G\_01725, score=2, range=440-460, strand=1  
target 5' AGAGUCCGGACUUAAAUCCAA 3'  
:: .....  
query 3' UCAUAGGUCUGAAUUUAGGUU 5'  
query=miR5632-3p, target=R03G\_07136, score=2, range=131-151, strand=1  
target 5' AGAGUCCGGACUUAAAUCCAA 3'  
:: .....  
query 3' UCAUAGGUCUGAAUUUAGGUU 5'  
query=miR5632-3p, target=R03G\_11533, score=2, range=440-460, strand=1  
target 5' AGAGUCCGGACUUAAAUCCAA 3'  
:: .....  
query 3' UCAUAGGUCUGAAUUUAGGUU 5'  
query=miR5632-3p, target=R03G\_13286, score=2, range=1004-1024, strand=1  
target 5' AGCCUCCAGACUUAAAUCCAA 3'  
:: .....  
query 3' UCAUAGGUCUGAAUUUAGGUU 5'  
query=miR5632-3p, target=R03G\_00284, score=2, range=821-841, strand=1  
target 5' AGCCUCCAGACUUAAAUCCAA 3'  
:: .....  
query 3' UCAUAGGUCUGAAUUUAGGUU 5'  
query=miR5632-3p, target=R03G\_16727, score=2, range=812-832, strand=1  
target 5' AGCCUCCAGACUUAAAUCCAA 3'  
:: .....  
query 3' UCAUAGGUCUGAAUUUAGGUU 5'  
query=miR5632-3p, target=R03G\_16719, score=2, range=812-832, strand=1  
target 5' AGCCUCCAGACUUAAAUCCAA 3'  
:: .....  
query 3' UCAUAGGUCUGAAUUUAGGUU 5'  
query=miR5632-3p, target=R03G\_01959, score=2, range=251-271, strand=1  
target 5' AGCCUCCAGACUUAAAUCCAA 3'  
:: .....  
query 3' UCAUAGGUCUGAAUUUAGGUU 5'

query=miR5632-3p, target=R03G\_16751, score=2, range=401-421, stra  
target 5' AGUUCCCAGACUUAAAUCCAA 3'  
::: :::::::::::::::::::::  
query 3' UCAUAGGUCUGAAUUUAGGUU 5'  
query=miR5632-3p, target=R03G\_03554, score=3, range=704-724, stra  
target 5' AGUCUCCUGACUUGAAUCCAA 3'  
::: ::: :::::::::::::::::::::  
query 3' UCAUAGGUCUGAAUUUAGGUU 5'  
query=miR5632-3p, target=R03G\_08657, score=3, range=704-724, stra  
target 5' AGUCUCCUGACUUGAAUCCAA 3'  
::: ::: :::::::::::::::::::::  
query 3' UCAUAGGUCUGAAUUUAGGUU 5'  
query=miR5632-3p, target=R03G\_10772, score=3, range=701-721, stra  
target 5' AGUCUCCUGACUUGAAUCCAA 3'  
::: ::: :::::::::::::::::::::  
query 3' UCAUAGGUCUGAAUUUAGGUU 5'  
query=miR5632-3p, target=R03G\_10768, score=3, range=17-37, strand  
target 5' AGUCUCCAGACUUAAAUGCAA 3'  
::: ::::::::::::::::::::: :::  
query 3' UCAUAGGUCUGAAUUUAGGUU 5'  
query=miR5632-3p, target=R03G\_04668, score=4, range=617-637, stra  
target 5' AGAGUCCGGACUUAAAUCCCA 3'  
:: .::::::::::::::::::: :  
query 3' UCAUAGGUCUGAAUUUAGGUU 5'  
query=miR5632-3p, target=R03G\_16121, score=4, range=395-415, stra  
target 5' AGAGUCCGGACUUAAAUCCCA 3'  
:: .::::::::::::::::::: :  
query 3' UCAUAGGUCUGAAUUUAGGUU 5'  
query=miR5632-3p, target=R03G\_00675, score=4, range=440-460, stra  
target 5' AGAGUCCGGACUUAAAUCCCA 3'  
:: .::::::::::::::::::: :  
query 3' UCAUAGGUCUGAAUUUAGGUU 5'  
query=miR5632-3p, target=R03G\_10237, score=4, range=380-400, stra  
target 5' AGAGUCCGGACUUAAAUCCCA 3'  
:: .::::::::::::::::::: :  
query 3' UCAUAGGUCUGAAUUUAGGUU 5'  
query=miR5632-3p, target=R03G\_07298, score=4, range=440-460, stra  
target 5' AGAGUCCGGACUUAAAUCCCA 3'  
:: .::::::::::::::::::: :  
query 3' UCAUAGGUCUGAAUUUAGGUU 5'  
query=miR5632-3p, target=R03G\_12664, score=4, range=539-559, stra  
target 5' AGUCCCCGGACUUGAAUCCAG 3'  
::: .:::::::::::::::::::  
query 3' UCAUAGGUCUGAAUUUAGGUU 5'  
query=miR5632-3p, target=R03G\_15287, score=4, range=446-466, stra



```

::: :: :::::::::::::::
query 3' UCAUAGGUCUGAAUUUAGGUU 5'
query=miR5632-3p, target=R03G_03766, score=4, range=590-610, stra
target 5' AGUCACCUGACUUGAAUCCAA 3'
::: :: :::::::::::::::
query 3' UCAUAGGUCUGAAUUUAGGUU 5'
query=miR5632-3p, target=R03G_17154, score=4, range=431-451, stra
target 5' ACUCUCCAGACUUAAAUCCUA 3'
: : ::::::::::::::: :
query 3' UCAUAGGUCUGAAUUUAGGUU 5'
query=miR5632-3p, target=R03G_13137, score=4, range=710-730, stra
target 5' AGUCCCCUGACUUGAAUCCAA 3'
::: :: :::::::::::::::
query 3' UCAUAGGUCUGAAUUUAGGUU 5'
query=miR5632-3p, target=R03G_04205, score=4, range=512-532, stra
target 5' AGUUCCCUGACUUGAAUCCAA 3'
::: :: :::::::::::::::
query 3' UCAUAGGUCUGAAUUUAGGUU 5'
query=miR5632-3p, target=R03G_13733, score=4, range=383-403, stra
target 5' AGUCCCCUGACUUGAAUCCAA 3'
::: :: :::::::::::::::
query 3' UCAUAGGUCUGAAUUUAGGUU 5'
query=miR475a-3p, target=R03G_16086, score=0, range=1825-1844,
strand=1
target 5' CUGAAGUCA AUGGGCAUUA 3'
::::::::::::::::::
query 3' GACUUCAGUUACCCGUAAUU 5'
query=miR475a-3p, target=R03G_02364, score=0, range=3409-3428,
strand=1
target 5' CUGAAGUCA AUGGGCAUUA 3'
::::::::::::::::::
query 3' GACUUCAGUUACCCGUAAUU 5'
query=miR475a-3p, target=R03G_15802, score=0, range=3409-3428,
strand=1
target 5' CUGAAGUCA AUGGGCAUUA 3'
::::::::::::::::::
query 3' GACUUCAGUUACCCGUAAUU 5'
query=miR475a-3p, target=R03G_12567, score=0, range=3409-3428,
strand=1
target 5' CUGAAGUCA AUGGGCAUUA 3'
::::::::::::::::::
query 3' GACUUCAGUUACCCGUAAUU 5'
query=miR475a-3p, target=R03G_04496, score=0, range=3031-3050,
strand=1
target 5' CUGAAGUCA AUGGGCAUUA 3'

```

```
::::::::::
query 3' GACUUCAGUUACCCGUAAUU 5'
query=miR475a-3p, target=R03G_06775, score=0, range=3409-3428,
strand=1
target 5' CUGAAGUCAAUUGGGCAUUAA 3'
::::::::::
query 3' GACUUCAGUUACCCGUAAUU 5'
query=miR475a-3p, target=R03G_04252, score=0, range=3409-3428,
strand=1
target 5' CUGAAGUCAAUUGGGCAUUAA 3'
::::::::::
query 3' GACUUCAGUUACCCGUAAUU 5'
query=miR475a-3p, target=R03G_07854, score=0, range=3409-3428,
strand=1
target 5' CUGAAGUCAAUUGGGCAUUAA 3'
::::::::::
query 3' GACUUCAGUUACCCGUAAUU 5'
query=miR475a-3p, target=R03G_14949, score=0, range=3031-3050,
strand=1
target 5' CUGAAGUCAAUUGGGCAUUAA 3'
::::::::::
query 3' GACUUCAGUUACCCGUAAUU 5'
query=miR475a-3p, target=R03G_01156, score=3, range=778-797, stra
target 5' CUGAAGUCAAUUGGUAUUAA 3'
::::::::::
query 3' GACUUCAGUUACCCGUAAUU 5'
query=miR475a-3p, target=R03G_16981, score=3, range=304-323, stra
target 5' CUGAAUUCAAUUGGCAUUAA 3'
::::: ::::: :::::
query 3' GACUUCAGUUACCCGUAAUU 5'
query=miR475a-3p, target=R03G_16987, score=3, range=286-305, stra
target 5' CUGAAUUCAAUUGGCAUUAA 3'
::::: ::::: :::::
query 3' GACUUCAGUUACCCGUAAUU 5'
query=miR475a-3p, target=R03G_10320, score=4, range=449-467, stra
target 5' AUGAAG-AAAUGGGCAUUAA 3'
::::: :::::
query 3' GACUUCAGUUACCCGUAAUU 5'
query=miR475a-3p, target=R03G_09513, score=4, range=421-439, stra
target 5' CUG-AGUCAAUUGGGCAAUAU 3'
::: :::::
query 3' GACUUCAGUUACCCGUAAUU 5'
query=miR8044-5p, target=R03G_17226, score=0, range=1843-1864,
strand=1
target 5' AAAUCUCCAACCAUUUUGACAA 3'
```

query 3' UUUAGAGGUUGGUAAAACUGUU 5'  
query=miR8044-5p, target=R03G\_16815, score=0, range=1843-1864,  
strand=1  
target 5' AAAUCUCCAACCAUUUUGACAA 3'

query 3' UUUAGAGGUUGGUAAAACUGUU 5'  
query=miR8044-5p, target=R03G\_14795, score=0, range=1843-1864,  
strand=1  
target 5' AAAUCUCCAACCAUUUUGACAA 3'

query 3' UUUAGAGGUUGGUAAAACUGUU 5'  
query=miR8044-5p, target=R03G\_11557, score=4, range=363-383, stra  
target 5' AAAUC-CCAAUCAUUUUGAUAU 3'

query 3' UUUAGAGGUUGGUAAAACUGUU 5'  
query=miR7725a-3p, target=R03G\_02691, score=0, range=377-398,  
strand=-1  
target 5' UUGACGAAAUGAGUUGUUUGCA 3'

query 3' AACUGCUUUACUCAACAAACGU 5'  
query=miR7725a-3p, target=R03G\_17318, score=0, range=1844-1865,  
strand=-1  
target 5' UUGACGAAAUGAGUUGUUUGCA 3'

query 3' AACUGCUUUACUCAACAAACGU 5'  
query=miR7725a-3p, target=R03G\_04118, score=0, range=1844-1865,  
strand=-1  
target 5' UUGACGAAAUGAGUUGUUUGCA 3'

query 3' AACUGCUUUACUCAACAAACGU 5'  
query=miR7725a-3p, target=R03G\_16143, score=0, range=1841-1862,  
strand=-1  
target 5' UUGACGAAAUGAGUUGUUUGCA 3'

query 3' AACUGCUUUACUCAACAAACGU 5'  
query=miR7725a-3p, target=R03G\_17274, score=0, range=1844-1865,  
strand=-1  
target 5' UUGACGAAAUGAGUUGUUUGCA 3'

query 3' AACUGCUUUACUCAACAAACGU 5'  
query=miR7725a-3p, target=R03G\_12533, score=0, range=1184-1205,  
strand=-1  
target 5' UUGACGAAAUGAGUUGUUUGCA 3'



query 3' AACUGCUUUACUCAACAAACGU 5'  
query=miR7725a-3p, target=R03G\_17329, score=0, range=1181-1202,  
strand=-1  
target 5' UUGACGAAAUGAGUUGUUUGCA 3'  
::::::::::::::::::::::::::

query 3' AACUGCUUUACUCAACAAACGU 5'  
query=miR7725a-3p, target=R03G\_07028, score=0, range=914-935,  
strand=-1  
target 5' UUGACGAAAUGAGUUGUUUGCA 3'  
::::::::::::::::::::::::::

query 3' AACUGCUUUACUCAACAAACGU 5'  
query=miR7725a-3p, target=R03G\_15135, score=0, range=1844-1865,  
strand=-1  
target 5' UUGACGAAAUGAGUUGUUUGCA 3'  
::::::::::::::::::::::::::

query 3' AACUGCUUUACUCAACAAACGU 5'  
query=miR7725a-3p, target=R03G\_17384, score=0, range=1844-1865,  
strand=-1  
target 5' UUGACGAAAUGAGUUGUUUGCA 3'  
::::::::::::::::::::::::::

query 3' AACUGCUUUACUCAACAAACGU 5'  
query=miR7725a-3p, target=R03G\_05919, score=0, range=2018-2039,  
strand=-1  
target 5' UUGACGAAAUGAGUUGUUUGCA 3'  
::::::::::::::::::::::::::

query 3' AACUGCUUUACUCAACAAACGU 5'  
query=miR7725a-3p, target=R03G\_16914, score=0, range=1778-1799,  
strand=-1  
target 5' UUGACGAAAUGAGUUGUUUGCA 3'  
::::::::::::::::::::::::::

query 3' AACUGCUUUACUCAACAAACGU 5'  
query=miR7725a-3p, target=R03G\_06727, score=0, range=1982-2003,  
strand=-1  
target 5' UUGACGAAAUGAGUUGUUUGCA 3'  
::::::::::::::::::::::::::

query 3' AACUGCUUUACUCAACAAACGU 5'  
query=miR4240, target=R03G\_12541, score=0, range=429-449, strand=  
target 5' GAAAUGUUACGAGUCAGUCGA 3'  
::::::::::::::::::::::::::

query 3' CUUUACAAUGCUCAGUCAGCU 5'  
query=miR4240, target=R03G\_09496, score=0, range=429-449, strand=  
target 5' GAAAUGUUACGAGUCAGUCGA 3'  
::::::::::::::::::::::::::

query 3' CUUUACAAUGCUCAGUCAGCU 5'  
query=miR4240, target=R03G\_13916, score=0, range=429-449, strand=



query 3' GAGUAGUAGAACUGGAAUG 5'  
query=miR6443, target=R03G\_09955, score=0, range=206-224, strand=  
target 5' CUCAUCAUCUUGACCUUAC 3'

query 3' GAGUAGUAGAACUGGAAUG 5'  
query=miR6443, target=R03G\_16825, score=0, range=329-347, strand=  
target 5' CUCAUCAUCUUGACCUUAC 3'

query 3' GAGUAGUAGAACUGGAAUG 5'  
query=miR6443, target=R03G\_04654, score=0, range=329-347, strand=  
target 5' CUCAUCAUCUUGACCUUAC 3'

query 3' GAGUAGUAGAACUGGAAUG 5'  
query=miR6443, target=R03G\_09167, score=0, range=329-347, strand=  
target 5' CUCAUCAUCUUGACCUUAC 3'

query 3' GAGUAGUAGAACUGGAAUG 5'  
query=miR6443, target=R03G\_12670, score=0, range=329-347, strand=  
target 5' CUCAUCAUCUUGACCUUAC 3'

query 3' GAGUAGUAGAACUGGAAUG 5'  
query=miR6443, target=R03G\_00247, score=0, range=329-347, strand=  
target 5' CUCAUCAUCUUGACCUUAC 3'

query 3' GAGUAGUAGAACUGGAAUG 5'  
query=miR6443, target=R03G\_16538, score=0, range=407-425, strand=  
target 5' CUCAUCAUCUUGACCUUAC 3'

query 3' GAGUAGUAGAACUGGAAUG 5'  
query=miR6443, target=R03G\_07302, score=0, range=329-347, strand=  
target 5' CUCAUCAUCUUGACCUUAC 3'

query 3' GAGUAGUAGAACUGGAAUG 5'  
query=miR6443, target=R03G\_09952, score=0, range=299-317, strand=  
target 5' CUCAUCAUCUUGACCUUAC 3'

query 3' GAGUAGUAGAACUGGAAUG 5'  
query=miR6443, target=R03G\_10224, score=0, range=329-347, strand=  
target 5' CUCAUCAUCUUGACCUUAC 3'

query 3' GAGUAGUAGAACUGGAAUG 5'  
query=miR6443, target=R03G\_17436, score=0, range=329-347, strand=  
target 5' CUCAUCAUCUUGACCUUAC 3'

query 3' GAGUAGUAGAACUGGAAUG 5'  
query=miR6443, target=R03G\_17293, score=0, range=329-347, strand=  
target 5' CUCAUCAUCUUGACCUUAC 3'  
.....  
query 3' GAGUAGUAGAACUGGAAUG 5'  
query=miR6443, target=R03G\_09944, score=0, range=329-347, strand=  
target 5' CUCAUCAUCUUGACCUUAC 3'  
.....  
query 3' GAGUAGUAGAACUGGAAUG 5'  
query=miR6443, target=R03G\_15672, score=0, range=329-347, strand=  
target 5' CUCAUCAUCUUGACCUUAC 3'  
.....  
query 3' GAGUAGUAGAACUGGAAUG 5'  
query=miR6443, target=R03G\_04200, score=0, range=329-347, strand=  
target 5' CUCAUCAUCUUGACCUUAC 3'  
.....  
query 3' GAGUAGUAGAACUGGAAUG 5'  
query=miR6443, target=R03G\_11405, score=0, range=329-347, strand=  
target 5' CUCAUCAUCUUGACCUUAC 3'  
.....  
query 3' GAGUAGUAGAACUGGAAUG 5'  
query=miR6443, target=R03G\_07689, score=0, range=329-347, strand=  
target 5' CUCAUCAUCUUGACCUUAC 3'  
.....  
query 3' GAGUAGUAGAACUGGAAUG 5'  
query=miR6443, target=R03G\_04786, score=0, range=89-107, strand=1  
target 5' CUCAUCAUCUUGACCUUAC 3'  
.....  
query 3' GAGUAGUAGAACUGGAAUG 5'  
query=miR6443, target=R03G\_02850, score=0, range=521-539, strand=  
target 5' CUCAUCAUCUUGACCUUAC 3'  
.....  
query 3' GAGUAGUAGAACUGGAAUG 5'  
query=miR6443, target=R03G\_07121, score=0, range=521-539, strand=  
target 5' CUCAUCAUCUUGACCUUAC 3'  
.....  
query 3' GAGUAGUAGAACUGGAAUG 5'  
query=miR6443, target=R03G\_07024, score=0, range=521-539, strand=  
target 5' CUCAUCAUCUUGACCUUAC 3'  
.....  
query 3' GAGUAGUAGAACUGGAAUG 5'  
query=miR6443, target=R03G\_03599, score=0, range=521-539, strand=  
target 5' CUCAUCAUCUUGACCUUAC 3'  
.....  
query 3' GAGUAGUAGAACUGGAAUG 5'

query=miR6443, target=R03G\_01925, score=0, range=521-539, strand=  
target 5' CUCAUCAUCUUGACCUUAC 3'  
::::::::::::::::::::  
query 3' GAGUAGUAGAACUGGAAUG 5'  
query=miR6443, target=R03G\_01587, score=0, range=338-356, strand=  
target 5' CUCAUCAUCUUGACCUUAC 3'  
::::::::::::::::::::  
query 3' GAGUAGUAGAACUGGAAUG 5'  
query=miR6443, target=R03G\_10515, score=0, range=443-461, strand=  
target 5' CUCAUCAUCUUGACCUUAC 3'  
::::::::::::::::::::  
query 3' GAGUAGUAGAACUGGAAUG 5'  
query=miR6443, target=R03G\_17361, score=0, range=89-107, strand=1  
target 5' CUCAUCAUCUUGACCUUAC 3'  
::::::::::::::::::::  
query 3' GAGUAGUAGAACUGGAAUG 5'  
query=miR6443, target=R03G\_06721, score=0, range=329-347, strand=  
target 5' CUCAUCAUCUUGACCUUAC 3'  
::::::::::::::::::::  
query 3' GAGUAGUAGAACUGGAAUG 5'  
query=miR6443, target=R03G\_14974, score=0, range=395-413, strand=  
target 5' CUCAUCAUCUUGACCUUAC 3'  
::::::::::::::::::::  
query 3' GAGUAGUAGAACUGGAAUG 5'  
query=miR6443, target=R03G\_13857, score=0, range=152-170, strand=  
target 5' CUCAUCAUCUUGACCUUAC 3'  
::::::::::::::::::::  
query 3' GAGUAGUAGAACUGGAAUG 5'  
query=miR6443, target=R03G\_14772, score=0, range=407-425, strand=  
target 5' CUCAUCAUCUUGACCUUAC 3'  
::::::::::::::::::::  
query 3' GAGUAGUAGAACUGGAAUG 5'  
query=miR6443, target=R03G\_10226, score=0, range=329-347, strand=  
target 5' CUCAUCAUCUUGACCUUAC 3'  
::::::::::::::::::::  
query 3' GAGUAGUAGAACUGGAAUG 5'  
query=miR6443, target=R03G\_12082, score=0, range=407-425, strand=  
target 5' CUCAUCAUCUUGACCUUAC 3'  
::::::::::::::::::::  
query 3' GAGUAGUAGAACUGGAAUG 5'  
query=miR6443, target=R03G\_16905, score=0, range=329-347, strand=  
target 5' CUCAUCAUCUUGACCUUAC 3'  
::::::::::::::::::::  
query 3' GAGUAGUAGAACUGGAAUG 5'  
query=miR6443, target=R03G\_17204, score=0, range=392-410, strand=

```

target 5' CUCAUCAUCUUGACCUUAC 3'
:
query 3' GAGUAGUAGAACUGGAAUG 5'
query=miR6443, target=R03G_12525, score=0, range=443-461, strand=
target 5' CUCAUCAUCUUGACCUUAC 3'
:
query 3' GAGUAGUAGAACUGGAAUG 5'
query=miR6443, target=R03G_03785, score=0, range=134-152, strand=
target 5' CUCAUCAUCUUGACCUUAC 3'
:
query 3' GAGUAGUAGAACUGGAAUG 5'
query=miR6443, target=R03G_08658, score=0, range=329-347, strand=
target 5' CUCAUCAUCUUGACCUUAC 3'
:
query 3' GAGUAGUAGAACUGGAAUG 5'
query=miR6443, target=R03G_03797, score=0, range=17-35, strand=1
target 5' CUCAUCAUCUUGACCUUAC 3'
:
query 3' GAGUAGUAGAACUGGAAUG 5'
query=miR6443, target=R03G_12196, score=0.5, range=443-461, stran
target 5' CUCGUCAUCUUGACCUUAC 3'
:
query 3' GAGUAGUAGAACUGGAAUG 5'
query=miR6443, target=R03G_12186, score=0.5, range=521-539, stran
target 5' CUCGUCAUCUUGACCUUAC 3'
:
query 3' GAGUAGUAGAACUGGAAUG 5'
query=miR6443, target=R03G_06424, score=1, range=122-140, strand=
target 5' CUCAUCAUCUUGACCUUGC 3'
:
query 3' GAGUAGUAGAACUGGAAUG 5'
query=miR6443, target=R03G_04661, score=2, range=152-170, strand=
target 5' CUCAUCAUCUUGACCCUAC 3'
:
query 3' GAGUAGUAGAACUGGAAUG 5'
query=miR6443, target=R03G_02589, score=2, range=935-952, strand=
target 5' CUUGU-AUCUUGACCUUAC 3'
:
query 3' GAGUAGUAGAACUGGAAUG 5'
query=miR6443, target=R03G_05486, score=2.5, range=284-303, stran
target 5' CUCGUCAUCUUGACCUCUAC 3'
:
query 3' GAGUAGUAGAACUGGA-AUG 5'
query=miR6443, target=R03G_17316, score=3, range=152-170, strand=
target 5' CUCAUCAUCUGGACUUUAC 3'

```

query 3' GAGUAGUAGAACUGGAAUG 5'  
query=miR6443, target=R03G\_00689, score=3, range=20-38, strand=1  
target 5' CUCAUCAUCUAGACUUUAC 3'

query 3' GAGUAGUAGAACUGGAAUG 5'  
query=miR6443, target=R03G\_07298, score=3, range=152-170, strand=  
target 5' CUCAUCAUCUAGACUUUAC 3'

query 3' GAGUAGUAGAACUGGAAUG 5'  
query=miR6443, target=R03G\_03777, score=3, range=152-170, strand=  
target 5' CUCAUCAUCUAGACUUUAC 3'

query 3' GAGUAGUAGAACUGGAAUG 5'  
query=miR6443, target=R03G\_01709, score=3, range=152-170, strand=  
target 5' CUCAUCAUCUAGACUUUAC 3'

query 3' GAGUAGUAGAACUGGAAUG 5'  
query=miR6443, target=R03G\_00675, score=3, range=152-170, strand=  
target 5' CUCAUCAUCUAGACUUUAC 3'

query 3' GAGUAGUAGAACUGGAAUG 5'  
query=miR6443, target=R03G\_04668, score=3, range=329-347, strand=  
target 5' CUCAUCAUCUAGACUUUAC 3'

query 3' GAGUAGUAGAACUGGAAUG 5'  
query=miR6443, target=R03G\_16121, score=3, range=107-125, strand=  
target 5' CUCAUCAUCUAGACUUUAC 3'

query 3' GAGUAGUAGAACUGGAAUG 5'  
query=miR6443, target=R03G\_04710, score=3, range=339-356, strand=  
target 5' CUC-UUAUCUUGAUCUUAU 3'

query 3' GAGUAGUAGAACUGGAAUG 5'  
query=miR6443, target=R03G\_09272, score=3, range=1222-1240, stran  
target 5' CUCACCUUCUUGACCUUAC 3'

query 3' GAGUAGUAGAACUGGAAUG 5'  
query=miR6443, target=R03G\_03106, score=3, range=74-92, strand=1  
target 5' CUCCUCAUCUUGACCUGAC 3'

query 3' GAGUAGUAGAACUGGAAUG 5'  
query=miR6443, target=R03G\_03096, score=3, range=326-344, strand=  
target 5' CUCCUCAUCUUGACCUGAC 3'

query 3' GAGUAGUAGAACUGGAAUG 5'  
query=miR6443, target=R03G\_03816, score=3, range=806-824, strand=  
target 5' AUCAUCAUCUUGAUCUAG 3'  
.....  
query 3' GAGUAGUAGAACUGGAAUG 5'  
query=miR6443, target=R03G\_04768, score=3, range=692-711, strand=  
target 5' CACAUUCAUCUUGACCUUGC 3'  
: : .....  
query 3' GAGU-AGUAGAACUGGAAUG 5'  
query=miR6443, target=R03G\_17059, score=3.5, range=1243-1260, str  
target 5' CUUGUCAUCUU-ACCUUUAU 3'  
.....  
query 3' GAGUAGUAGAACUGGAAUG 5'  
query=miR6443, target=R03G\_05791, score=3.5, range=520-538, stran  
target 5' CGAAACAUCUUGACCUUUAU 3'  
: : .....  
query 3' GAGUAGUAGAACUGGAAUG 5'  
query=miR6443, target=R03G\_02810, score=3.5, range=320-338, stran  
target 5' UUCAUCAUCUUUAUCUUAU 3'  
.....  
query 3' GAGUAGUAGAACUGGAAUG 5'  
query=miR6443, target=R03G\_06631, score=3.5, range=4769-4788,  
strand=-1  
target 5' UUCAUCAUCUUGGCCUUA 3'  
.....  
query 3' GAGUAG-UAGAACUGGAAUG 5'  
query=miR6443, target=R03G\_04064, score=3.5, range=81-98, strand=  
target 5' CUC-UUAUCUUGAUCUUGC 3'  
::: .....  
query 3' GAGUAGUAGAACUGGAAUG 5'  
query=miR6443, target=R03G\_00042, score=3.5, range=68-86, strand=  
target 5' UUCACCUUCUUGACCUUAC 3'  
.: : .....  
query 3' GAGUAGUAGAACUGGAAUG 5'  
query=miR6443, target=R03G\_03345, score=3.5, range=659-677, stran  
target 5' UUGAGGAUCUUGACCUUAC 3'  
.: : .....  
query 3' GAGUAGUAGAACUGGAAUG 5'  
query=miR6443, target=R03G\_12122, score=3.5, range=659-677, stran  
target 5' UUGAGGAUCUUGACCUUAC 3'  
.: : .....  
query 3' GAGUAGUAGAACUGGAAUG 5'  
query=miR6443, target=R03G\_08799, score=3.5, range=551-569, stran  
target 5' UUAAGGAUCUUGACCUUAC 3'  
.: : .....





query=miR6443, target=R03G\_12785, score=4, range=557-575, strand=  
target 5' GUCUUCGUCUUGACCUUAA 3'  
:: :::::::::::::::  
query 3' GAGUAGUAGAACUGGAAUG 5'  
query=miR6443, target=R03G\_05879, score=4, range=596-614, strand=  
target 5' CUCAAGAUCGUGACCUUAC 3'  
:::: :: :::::::::::::::  
query 3' GAGUAGUAGAACUGGAAUG 5'  
query=miR6443, target=R03G\_02040, score=4, range=1487-1505, stran  
target 5' CUACUCAUCCUGACCUUAC 3'  
:: :::::: :::::::::::::::  
query 3' GAGUAGUAGAACUGGAAUG 5'  
query=miR6443, target=R03G\_03735, score=4, range=544-563, strand=  
target 5' CUCCUCUUCUUGACCUCUAC 3'  
::: :: ::::::::::::::: :::  
query 3' GAGUAGUAGAACUGGA-AUG 5'  
query=miR6443, target=R03G\_09820, score=4, range=482-499, strand=  
target 5' UCCUCAUCUU-ACCUUAC 3'  
.:: ::::::::::: ::::::::::.  
query 3' GAGUAGUAGAACUGGAAUG 5'  
query=miR6443, target=R03G\_08962, score=4, range=38-55, strand=1  
target 5' UUCUUUAUCUU-ACCUUAC 3'  
.:: ::::::::::: ::::::::::.  
query 3' GAGUAGUAGAACUGGAAUG 5'  
query=miR6443, target=R03G\_03905, score=4, range=1995-2013, stran  
target 5' UUCAUCUUCUUGACCUUGU 3'  
.::::: ::::::::::::::..  
query 3' GAGUAGUAGAACUGGAAUG 5'  
query=miR6443, target=R03G\_16310, score=4, range=1464-1482, stran  
target 5' UUCAUUAUCUUGACCUCGC 3'  
.::::: ::::::::::::::: .:  
query 3' GAGUAGUAGAACUGGAAUG 5'  
query=miR6443, target=R03G\_14746, score=4, range=2478-2496, stran  
target 5' UCCUCAUCUUGAUCUUGU 3'  
.::: ::::::::::::::: ..  
query 3' GAGUAGUAGAACUGGAAUG 5'  
query=miR6443, target=R03G\_05993, score=4, range=1603-1622, stran  
target 5' GUGAUCUUCUUGACCUGUAC 3'  
: ::::::::::::::: :::  
query 3' GAGUAGUAGAACUGGA-AUG 5'  
query=miR6443, target=R03G\_03668, score=4, range=74-93, strand=-1  
target 5' GUCAUCCUCUUGAUCUAC 3'  
::::: ::::::: :::::::  
query 3' GAGUAGUAGAACU-GGAAUG 5'  
query=miR6443, target=R03G\_01474, score=4, range=494-511, strand=

target 5' CUU-UCAUCUUGACCAUUAU 3'  
::: :::  
query 3' GAGUAGUAGAACUGGAAUG 5'  
query=miR6443, target=R03G\_08748, score=4, range=279-296, strand=  
target 5' AUC-UCAUCUUGACCUUGA 3'  
:: :::  
query 3' GAGUAGUAGAACUGGAAUG 5'  
query=miR3441-5p.2, target=R03G\_03247, score=4, range=222-243,  
strand=-1  
target 5' AAGAGCAAUUUCAUUUUCUUCA 3'  
::: :::  
query 3' UUUUCGCUGAAGUAAAAGAACU 5'  
query=miR3441-5p.2, target=R03G\_15367, score=4, range=27-48, stra  
target 5' AACAGUGACUCAAUUUCUUGG 3'  
:: :::  
query 3' UUUUCGCUGAAGUAAAAGAACU 5'  
query=miR6029, target=R03G\_13006, score=4, range=1448-1468, stran  
target 5' UAGCUG-AUAUUCACAACCUUG 3'  
::: :::  
query 3' AUCGACUUGUAAGUGUUGGGGU 5'  
query=miR7508, target=R03G\_05769, score=3.5, range=87-105, strand  
target 5' UUUACUGAUUUGUUUUUUA 3'  
... :::  
query 3' GGAGGGCUGAACAAAAAAU 5'  
query=miR7508, target=R03G\_10957, score=3.5, range=1098-1115, str  
target 5' UCU-UUGGCUUGUUUUUUA 3'  
... :::  
query 3' GGAGGGCUGAACAAAAAAU 5'  
query=miR7508, target=R03G\_04288, score=3.5, range=1924-1942,  
strand=-1  
target 5' CCACCUGGCUUGUUUUUUU 3'  
:: :::  
query 3' GGAGGGCUGAACAAAAAAU 5'  
query=miR7508, target=R03G\_09636, score=3.5, range=1014-1032,  
strand=-1  
target 5' AUUAUCGACUUGUUUUUUG 3'  
.: :::  
query 3' GGAGGGCUGAACAAAAAAU 5'  
query=miR7508, target=R03G\_10151, score=3.5, range=5295-5312,  
strand=-1  
target 5' UCUCUC-ACUUGUUUUUUG 3'  
.: :::  
query 3' GGAGGGCUGAACAAAAAAU 5'  
query=miR7508, target=R03G\_13300, score=4, range=1750-1768, stran  
target 5' UCUCUGAUUUGUCUUUUUA 3'

```

.: :
query 3' GGAGGGCUGAACAAAAAAU 5'
query=miR7508, target=R03G_09480, score=4, range=1750-1768, stran
target 5' UCUCUGAUUUGUCUUUUA 3'
.: :
query 3' GGAGGGCUGAACAAAAAAU 5'
query=miR7508, target=R03G_10448, score=4, range=58-75, strand=1
target 5' CCU-UUGAAUUGUUUUUUA 3'
.: :
query 3' GGAGGGCUGAACAAAAAAU 5'
query=miR7508, target=R03G_03982, score=4, range=120-139, strand=
target 5' CCUCUUGCAUUUGUUUUUUA 3'
.: :
query 3' GGAGGGC-UGAACAAAAAAU 5'
query=miR7508, target=R03G_15626, score=4, range=105-123, strand=
target 5' UUUCUUGACUUGCUUUUUA 3'
.: :
query 3' GGAGGGCUGAACAAAAAAU 5'
query=miR7508, target=R03G_04628, score=4, range=138-156, strand=
target 5' CUUUUUGACUUCUUUUUUA 3'
.: :
query 3' GGAGGGCUGAACAAAAAAU 5'
query=miR7508, target=R03G_15226, score=4, range=28-47, strand=-1
target 5' UCUUUCGACUUGUGUUUUUG 3'
.: :
query 3' GGAGGGCUGAACAA-AAAAAU 5'
query=miR7508, target=R03G_16275, score=4, range=290-309, strand=
target 5' UCUUUUGACUUGUUUUUUA 3'
.: :
query 3' GGAGGGCUG-AAACAAAAAAU 5'
query=miR7508, target=R03G_10108, score=4, range=1871-1890, stran
target 5' ACUCUUGACUUGCUUUUUUA 3'
.: :
query 3' GGAGGGCUGAAC-AAAAAAU 5'
query=miR7508, target=R03G_09472, score=4, range=369-387, strand=
target 5' CUUUGCGAUUUGUUUUUUC 3'
.: :
query 3' GGAGGGCUGAACAAAAAAU 5'
query=miR7508, target=R03G_12789, score=4, range=822-839, strand=
target 5' UUUCUUGACUU-UUUUUUA 3'
.: :
query 3' GGAGGGCUGAACAAAAAAU 5'
query=miR7508, target=R03G_00476, score=4, range=183-202, strand=
target 5' CCUGUCGACUUGAUUUUUUG 3'
.: :

```





```

.: : : : : : : : : : : .
query 3' GUAAUAAGGUACGAUUGU 5'
query=miR1061-3p, target=R03G_04817, score=4, range=650-667, stra
target 5' CCUUAUCCCUGCUAACU 3'
: : : : : : : : : : :
query 3' GUAAUAAGGUACGAUUGU 5'
query=miR1061-3p, target=R03G_12684, score=4, range=336-352, stra
target 5' CAGU-UUCCAUGUUGACA 3'
: : : : : : : : : : :
query 3' GUAAUAAGGUACGAUUGU 5'
query=miR1061-3p, target=R03G_09476, score=4, range=315-331, stra
target 5' UGUUCUCCAUGCU-ACA 3'
.: : : : : : : : : : :
query 3' GUAAUAAGGUACGAUUGU 5'
query=miR1061-3p, target=R03G_04299, score=4, range=258-276, stra
target 5' CACUUCUCCUUGCUAACA 3'
: : : : : : : : : : :
query 3' GU-AAUAAGGUACGAUUGU 5'
query=miR1061-3p, target=R03G_08883, score=4, range=114-131, stra
target 5' CAGCCUCCAUGCUGACA 3'
: : : : : : : : : : :
query 3' GUAAUAAGGUACGAUUGU 5'
query=miR1061-3p, target=R03G_05448, score=4, range=1535-1551,
strand=-1
target 5' CACU-UUCAUGCUAACA 3'
: : : : : : : : : : :
query 3' GUAAUAAGGUACGAUUGU 5'
query=miR1061-3p, target=R03G_08652, score=4, range=186-202, stra
target 5' CACU-UCCAUGCCAACA 3'
: : : : : : : : : : :
query 3' GUAAUAAGGUACGAUUGU 5'
query=miR5821, target=R03G_17015, score=0, range=1022-1042, stran
target 5' CUCUACCAUCGUCUCCGUCCA 3'
: : : : : : : : : : :
query 3' GAGAUGGUAGCAGAGGCAGGU 5'
query=miR5821, target=R03G_10929, score=3.5, range=782-801, stran
target 5' CUCU-CCGUCGUCUCCGUUCU 3'
.: : : : : : : : : : :
query 3' GAGAUGGUAGCAGAGGCAGGU 5'
query=miR5821, target=R03G_01864, score=3.5, range=782-801, stran
target 5' CUCU-CCGUCGUCUCCGUUCC 3'
.: : : : : : : : : : :
query 3' GAGAUGGUAGCAGAGGCAGGU 5'
query=miR5821, target=R03G_11069, score=3.5, range=782-801, stran
target 5' CUCU-CCGUCGUCUCCGUUCC 3'

```

```
:::: :::::::::::::::
query 3' GAGAUGGUAGCAGAGGCAGGU 5'
query=miR5821, target=R03G_05170, score=3.5, range=782-801, stran
target 5' CUCU-CCGUCGUCUCCGUUCU 3'
:::: :::::::::::::::
query 3' GAGAUGGUAGCAGAGGCAGGU 5'
query=miR5821, target=R03G_04495, score=4, range=489-510, strand=
target 5' CCCUACAAUCGUCUCUGUCCA 3'
: :::: ::::::::::: ::::::
query 3' GAGAUGGUAGCAGAG-GCAGGU 5'
query=miR5821, target=R03G_10279, score=4, range=222-242, strand=
target 5' CGGUAGCAUCGUCUCUGUCCA 3'
: :: :::::::::::::::
query 3' GAGAUGGUAGCAGAGGCAGGU 5'
query=miR5821, target=R03G_14257, score=4, range=1135-1155, stran
target 5' UUCCACUAUUGUCUCUGUCCA 3'
.:: :::::::::::::::
query 3' GAGAUGGUAGCAGAGGCAGGU 5'
query=miR1048-3p, target=R03G_06442, score=1, range=4680-4700,
strand=-1
target 5' CCAGGAACAUAAGCGUAGACA 3'
: :::::::::::::::
query 3' GAUCCUUGUAUUCGCAUCUGU 5'
query=miR1048-3p, target=R03G_09965, score=1, range=4023-4043,
strand=-1
target 5' CCAGGAACAUAAGCGUAGACA 3'
: :::::::::::::::
query 3' GAUCCUUGUAUUCGCAUCUGU 5'
query=miR1048-3p, target=R03G_13920, score=1, range=4023-4043,
strand=-1
target 5' CCAGGAACAUAAGCGUAGACA 3'
: :::::::::::::::
query 3' GAUCCUUGUAUUCGCAUCUGU 5'
query=miR1048-3p, target=R03G_03547, score=1, range=4023-4043,
strand=-1
target 5' CCAGGAACAUAAGCGUAGACA 3'
: :::::::::::::::
query 3' GAUCCUUGUAUUCGCAUCUGU 5'
query=miR1048-3p, target=R03G_13867, score=1, range=3939-3959,
strand=-1
target 5' CCAGGAACAUAAGCGUAGACA 3'
: :::::::::::::::
query 3' GAUCCUUGUAUUCGCAUCUGU 5'
query=miR1048-3p, target=R03G_02959, score=1, range=4023-4043,
strand=-1
```



target 5' CCAGGAACAUAAGCGUAGACA 3'  
: ::::::::::::::::::::::  
query 3' GAUCCUUGUAUUCGCAUCUGU 5'  
query=miR1048-3p, target=R03G\_15250, score=1, range=3978-3998,  
strand=-1  
target 5' CCAGGAACAUAAGCGUAGACA 3'  
: ::::::::::::::::::::::  
query 3' GAUCCUUGUAUUCGCAUCUGU 5'  
query=miR1048-3p, target=R03G\_17371, score=1, range=3978-3998,  
strand=-1  
target 5' CCAGGAACAUAAGCGUAGACA 3'  
: ::::::::::::::::::::::  
query 3' GAUCCUUGUAUUCGCAUCUGU 5'  
query=miR1048-3p, target=R03G\_06427, score=1, range=3615-3635,  
strand=-1  
target 5' CCAGGAACAUAAGCGUAGACA 3'  
: ::::::::::::::::::::::  
query 3' GAUCCUUGUAUUCGCAUCUGU 5'  
query=miR1048-3p, target=R03G\_17326, score=1, range=3855-3875,  
strand=-1  
target 5' CCAGGAACAUAAGCGUAGACA 3'  
: ::::::::::::::::::::::  
query 3' GAUCCUUGUAUUCGCAUCUGU 5'  
query=miR1048-3p, target=R03G\_06428, score=1, range=3117-3137,  
strand=-1  
target 5' CCAGGAACAUAAGCGUAGACA 3'  
: ::::::::::::::::::::::  
query 3' GAUCCUUGUAUUCGCAUCUGU 5'  
query=miR1048-3p, target=R03G\_13749, score=1, range=2532-2552,  
strand=-1  
target 5' CCAGGAACAUAAGCGUAGACA 3'  
: ::::::::::::::::::::::  
query 3' GAUCCUUGUAUUCGCAUCUGU 5'  
query=miR1048-3p, target=R03G\_05619, score=1, range=2166-2186,  
strand=-1  
target 5' CCAGGAACAUAAGCGUAGACA 3'  
: ::::::::::::::::::::::  
query 3' GAUCCUUGUAUUCGCAUCUGU 5'  
query=miR1048-3p, target=R03G\_14355, score=1, range=2229-2249,  
strand=-1  
target 5' CCAGGAACAUAAGCGUAGACA 3'  
: ::::::::::::::::::::::  
query 3' GAUCCUUGUAUUCGCAUCUGU 5'  
query=miR1048-3p, target=R03G\_01613, score=1, range=2220-2240,  
strand=-1

target 5' CCAGGAACAUAAGCGUAGACA 3'  
: ::::::::::::::::::::::  
query 3' GAUCCUUGUAUUCGCAUCUGU 5'  
query=miR1048-3p, target=R03G\_01330, score=1, range=1257-1277,  
strand=-1  
target 5' CCAGGAACAUAAGCGUAGACA 3'  
: ::::::::::::::::::::::  
query 3' GAUCCUUGUAUUCGCAUCUGU 5'  
query=miR1048-3p, target=R03G\_11776, score=1, range=1113-1133,  
strand=-1  
target 5' CCAGGAACAUAAGCGUAGACA 3'  
: ::::::::::::::::::::::  
query 3' GAUCCUUGUAUUCGCAUCUGU 5'  
query=miR1048-3p, target=R03G\_02222, score=1, range=1077-1097,  
strand=-1  
target 5' CCAGGAACAUAAGCGUAGACA 3'  
: ::::::::::::::::::::::  
query 3' GAUCCUUGUAUUCGCAUCUGU 5'  
query=miR1048-3p, target=R03G\_10558, score=1, range=1776-1796,  
strand=-1  
target 5' CCAGGAACAUAAGCGUAGACA 3'  
: ::::::::::::::::::::::  
query 3' GAUCCUUGUAUUCGCAUCUGU 5'  
query=miR1048-3p, target=R03G\_04115, score=1, range=966-986, stra  
target 5' CCAGGAACAUAAGCGUAGACA 3'  
: ::::::::::::::::::::::  
query 3' GAUCCUUGUAUUCGCAUCUGU 5'  
query=miR1048-3p, target=R03G\_17404, score=1, range=651-671, stra  
target 5' CCAGGAACAUAAGCGUAGACA 3'  
: ::::::::::::::::::::::  
query 3' GAUCCUUGUAUUCGCAUCUGU 5'  
query=miR1048-3p, target=R03G\_07668, score=1, range=606-626, stra  
target 5' CCAGGAACAUAAGCGUAGACA 3'  
: ::::::::::::::::::::::  
query 3' GAUCCUUGUAUUCGCAUCUGU 5'  
query=miR1048-3p, target=R03G\_02691, score=2, range=7512-7532,  
strand=-1  
target 5' CCAGGAACAUAAGCGUAGACA 3'  
: ::::::::::::::::::::::  
query 3' GAUCCUUGUAUUCGCAUCUGU 5'  
query=miR482d-3p, target=R03G\_13222, score=0, range=676-697, stra  
target 5' UGGCAUAGGUAGGGUCGGCCAA 3'  
: ::::::::::::::::::::::  
query 3' ACCGUAUCCAUCCCAGCCGGUU 5'  
query=miR482d-3p, target=R03G\_14778, score=0, range=715-736, stra



query 3' UGAGUAGCAGGUAAGAAAGGGU 5'  
query=miR6255, target=R03G\_05181, score=0, range=979-1000, strand  
target 5' ACUCAUCGUCCAUUCUUUCCCA 3'

query 3' UGAGUAGCAGGUAAGAAAGGGU 5'  
query=miR6255, target=R03G\_13664, score=0, range=979-1000, strand  
target 5' ACUCAUCGUCCAUUCUUUCCCA 3'

query 3' UGAGUAGCAGGUAAGAAAGGGU 5'  
query=miR6255, target=R03G\_02354, score=0, range=979-1000, strand  
target 5' ACUCAUCGUCCAUUCUUUCCCA 3'

query 3' UGAGUAGCAGGUAAGAAAGGGU 5'  
query=miR6255, target=R03G\_08906, score=0, range=979-1000, strand  
target 5' ACUCAUCGUCCAUUCUUUCCCA 3'

query 3' UGAGUAGCAGGUAAGAAAGGGU 5'  
query=miR6255, target=R03G\_13903, score=0, range=979-1000, strand  
target 5' ACUCAUCGUCCAUUCUUUCCCA 3'

query 3' UGAGUAGCAGGUAAGAAAGGGU 5'  
query=miR6255, target=R03G\_05303, score=0, range=979-1000, strand  
target 5' ACUCAUCGUCCAUUCUUUCCCA 3'

query 3' UGAGUAGCAGGUAAGAAAGGGU 5'  
query=miR6255, target=R03G\_05194, score=0, range=979-1000, strand  
target 5' ACUCAUCGUCCAUUCUUUCCCA 3'

query 3' UGAGUAGCAGGUAAGAAAGGGU 5'  
query=miR6255, target=R03G\_13672, score=0, range=979-1000, strand  
target 5' ACUCAUCGUCCAUUCUUUCCCA 3'

query 3' UGAGUAGCAGGUAAGAAAGGGU 5'  
query=miR6255, target=R03G\_11567, score=1, range=1636-1657, stran  
target 5' ACUCAUCAUCCAUUCUUUCCCA 3'

query 3' UGAGUAGCAGGUAAGAAAGGGU 5'  
query=miR6255, target=R03G\_01923, score=1, range=928-949, strand=  
target 5' ACUCAUCAUCCAUUCUUUCCCA 3'

query 3' UGAGUAGCAGGUAAGAAAGGGU 5'  
query=miR6255, target=R03G\_09419, score=1, range=799-820, strand=  
target 5' ACUCAUCAUCCAUUCUUUCCCA 3'







: :::::::::::::::  
query 3' CUUUUACUUGAUACUGUUUU 5'  
query=miR6194, target=R03G\_10233, score=0, range=2142-2164, stran  
target 5' CUCGUGUGUCAAGAUGCCUACUA 3'  
:::::::::::::  
query 3' GAGCACACAGUUCUAGGGAUGAU 5'  
query=miR6194, target=R03G\_01744, score=0, range=2145-2167, stran  
target 5' CUCGUGUGUCAAGAUGCCUACUA 3'  
:::::::::::::  
query 3' GAGCACACAGUUCUAGGGAUGAU 5'  
query=miR6194, target=R03G\_04025, score=0, range=2142-2164, stran  
target 5' CUCGUGUGUCAAGAUGCCUACUA 3'  
:::::::::::::  
query 3' GAGCACACAGUUCUAGGGAUGAU 5'  
query=miR5059, target=R03G\_13235, score=4, range=1381-1399, stran  
target 5' UGUAG-GCUGUCCAGGAUCG 3'  
:: : :::::::::::::::  
query 3' CCACCACGACGGGUCCUAGC 5'  
query=miR415, target=R03G\_07738, score=0, range=179-200, strand=1  
target 5' CUGCUUCUGCUUCUGUCCUUU 3'  
:::::::::::::  
query 3' GACGAAGACGAAGACAAGGAAA 5'  
query=miR415, target=R03G\_11537, score=0, range=179-200, strand=1  
target 5' CUGCUUCUGCUUCUGUCCUUU 3'  
:::::::::::::  
query 3' GACGAAGACGAAGACAAGGAAA 5'  
query=miR415, target=R03G\_11236, score=0, range=179-200, strand=1  
target 5' CUGCUUCUGCUUCUGUCCUUU 3'  
:::::::::::::  
query 3' GACGAAGACGAAGACAAGGAAA 5'  
query=miR415, target=R03G\_17248, score=0, range=167-188, strand=1  
target 5' CUGCUUCUGCUUCUGUCCUUU 3'  
:::::::::::::  
query 3' GACGAAGACGAAGACAAGGAAA 5'  
query=miR415, target=R03G\_10041, score=0, range=167-188, strand=1  
target 5' CUGCUUCUGCUUCUGUCCUUU 3'  
:::::::::::::  
query 3' GACGAAGACGAAGACAAGGAAA 5'  
query=miR415, target=R03G\_06730, score=0, range=137-158, strand=1  
target 5' CUGCUUCUGCUUCUGUCCUUU 3'  
:::::::::::::  
query 3' GACGAAGACGAAGACAAGGAAA 5'  
query=miR415, target=R03G\_07981, score=0, range=137-158, strand=1  
target 5' CUGCUUCUGCUUCUGUCCUUU 3'  
:::::::::::::



query 3' GACGAAGACGAAGACAAGGAAA 5'  
query=miR415, target=R03G\_15897, score=0, range=137-158, strand=1  
target 5' CUGCUUCUGCUUCUGUCCUUU 3'  
.....  
query 3' GACGAAGACGAAGACAAGGAAA 5'  
query=miR415, target=R03G\_07720, score=0, range=137-158, strand=1  
target 5' CUGCUUCUGCUUCUGUCCUUU 3'  
.....  
query 3' GACGAAGACGAAGACAAGGAAA 5'  
query=miR415, target=R03G\_09602, score=0, range=137-158, strand=1  
target 5' CUGCUUCUGCUUCUGUCCUUU 3'  
.....  
query 3' GACGAAGACGAAGACAAGGAAA 5'  
query=miR415, target=R03G\_07306, score=0, range=137-158, strand=1  
target 5' CUGCUUCUGCUUCUGUCCUUU 3'  
.....  
query 3' GACGAAGACGAAGACAAGGAAA 5'  
query=miR415, target=R03G\_04211, score=0, range=137-158, strand=1  
target 5' CUGCUUCUGCUUCUGUCCUUU 3'  
.....  
query 3' GACGAAGACGAAGACAAGGAAA 5'  
query=miR415, target=R03G\_07696, score=0, range=137-158, strand=1  
target 5' CUGCUUCUGCUUCUGUCCUUU 3'  
.....  
query 3' GACGAAGACGAAGACAAGGAAA 5'  
query=miR415, target=R03G\_14551, score=0, range=137-158, strand=1  
target 5' CUGCUUCUGCUUCUGUCCUUU 3'  
.....  
query 3' GACGAAGACGAAGACAAGGAAA 5'  
query=miR415, target=R03G\_09929, score=0, range=137-158, strand=1  
target 5' CUGCUUCUGCUUCUGUCCUUU 3'  
.....  
query 3' GACGAAGACGAAGACAAGGAAA 5'  
query=miR415, target=R03G\_15147, score=0, range=113-134, strand=1  
target 5' CUGCUUCUGCUUCUGUCCUUU 3'  
.....  
query 3' GACGAAGACGAAGACAAGGAAA 5'  
query=miR415, target=R03G\_10775, score=0, range=167-188, strand=1  
target 5' CUGCUUCUGCUUCUGUCCUUU 3'  
.....  
query 3' GACGAAGACGAAGACAAGGAAA 5'  
query=miR415, target=R03G\_03584, score=0, range=95-116, strand=1  
target 5' CUGCUUCUGCUUCUGUCCUUU 3'  
.....  
query 3' GACGAAGACGAAGACAAGGAAA 5'

query=miR415, target=R03G\_09603, score=0, range=179-200, strand=1  
target 5' CUGCUUCUGCUUCUGUCCUUU 3'  
::::::::::::::::::::::::::  
query 3' GACGAAGACGAAGACAAGGAAA 5'  
query=miR415, target=R03G\_15890, score=0, range=161-182, strand=1  
target 5' CUGCUUCUGCUUCUGUCCUUU 3'  
::::::::::::::::::::::::::  
query 3' GACGAAGACGAAGACAAGGAAA 5'  
query=miR415, target=R03G\_13146, score=0, range=161-182, strand=1  
target 5' CUGCUUCUGCUUCUGUCCUUU 3'  
::::::::::::::::::::::::::  
query 3' GACGAAGACGAAGACAAGGAAA 5'  
query=miR415, target=R03G\_05425, score=0, range=167-188, strand=1  
target 5' CUGCUUCUGCUUCUGUCCUUU 3'  
::::::::::::::::::::::::::  
query 3' GACGAAGACGAAGACAAGGAAA 5'  
query=miR415, target=R03G\_17256, score=0, range=161-182, strand=1  
target 5' CUGCUUCUGCUUCUGUCCUUU 3'  
::::::::::::::::::::::::::  
query 3' GACGAAGACGAAGACAAGGAAA 5'  
query=miR415, target=R03G\_16137, score=0, range=161-182, strand=1  
target 5' CUGCUUCUGCUUCUGUCCUUU 3'  
::::::::::::::::::::::::::  
query 3' GACGAAGACGAAGACAAGGAAA 5'  
query=miR415, target=R03G\_17350, score=0, range=161-182, strand=1  
target 5' CUGCUUCUGCUUCUGUCCUUU 3'  
::::::::::::::::::::::::::  
query 3' GACGAAGACGAAGACAAGGAAA 5'  
query=miR415, target=R03G\_10218, score=0, range=167-188, strand=1  
target 5' CUGCUUCUGCUUCUGUCCUUU 3'  
::::::::::::::::::::::::::  
query 3' GACGAAGACGAAGACAAGGAAA 5'  
query=miR415, target=R03G\_09182, score=0, range=161-182, strand=1  
target 5' CUGCUUCUGCUUCUGUCCUUU 3'  
::::::::::::::::::::::::::  
query 3' GACGAAGACGAAGACAAGGAAA 5'  
query=miR415, target=R03G\_16748, score=0, range=137-158, strand=1  
target 5' CUGCUUCUGCUUCUGUCCUUU 3'  
::::::::::::::::::::::::::  
query 3' GACGAAGACGAAGACAAGGAAA 5'  
query=miR415, target=R03G\_02228, score=0, range=137-158, strand=1  
target 5' CUGCUUCUGCUUCUGUCCUUU 3'  
::::::::::::::::::::::::::  
query 3' GACGAAGACGAAGACAAGGAAA 5'  
query=miR415, target=R03G\_13272, score=0, range=220-241, strand=1



query 3' GACGAAGACGAAGACAAGGAAA 5'  
query=miR415, target=R03G\_10043, score=2, range=188-209, strand=1  
target 5' CUGCUUCUGCUUCUGUUCCUGU 3'

query 3' GACGAAGACGAAGACAAGGAAA 5'  
query=miR415, target=R03G\_17460, score=2, range=218-239, strand=1  
target 5' CUGCUUCUGCUUCUGUUCCUGU 3'

query 3' GACGAAGACGAAGACAAGGAAA 5'  
query=miR415, target=R03G\_13452, score=2, range=170-191, strand=1  
target 5' CUGCUUCUGCUUCUGUUCCUGU 3'

query 3' GACGAAGACGAAGACAAGGAAA 5'  
query=miR415, target=R03G\_16369, score=2, range=173-194, strand=1  
target 5' CUGCUUCUGCUUCUGUUCCUGU 3'

query 3' GACGAAGACGAAGACAAGGAAA 5'  
query=miR415, target=R03G\_00288, score=2, range=161-182, strand=1  
target 5' CUGCUUCUGCUUCUGUUCCUGU 3'

query 3' GACGAAGACGAAGACAAGGAAA 5'  
query=miR415, target=R03G\_14553, score=2, range=194-215, strand=1  
target 5' CUGCUUCUGCUUCUGUUCCUGU 3'

query 3' GACGAAGACGAAGACAAGGAAA 5'  
query=miR415, target=R03G\_11543, score=2, range=194-215, strand=1  
target 5' CUGCUUCUGCUUCUGUUCCUGU 3'

query 3' GACGAAGACGAAGACAAGGAAA 5'  
query=miR415, target=R03G\_15887, score=2, range=218-239, strand=1  
target 5' CUGCUUCUGCUUCUGUUCCUGU 3'

query 3' GACGAAGACGAAGACAAGGAAA 5'  
query=miR415, target=R03G\_01192, score=2, range=131-152, strand=1  
target 5' CUGCUUCUGCUUCUGUUCCUGU 3'

query 3' GACGAAGACGAAGACAAGGAAA 5'  
query=miR415, target=R03G\_17244, score=2, range=191-212, strand=1  
target 5' CUGCUUCUGCUUCUGUUCCUGU 3'

query 3' GACGAAGACGAAGACAAGGAAA 5'  
query=miR415, target=R03G\_05347, score=2, range=194-215, strand=1  
target 5' CUGCUUCUGCUUCUGUUCCUGU 3'





target 5' GUUCCAAGUCAACCGUCCAA 3'  
:::: ::::::::::::::::::::  
query 3' CAAGAUUCAGUUGGCAGGUU 5'  
query=miR5185l-3p, target=R03G\_08848, score=1, range=50-69, stran  
target 5' GUUCCAAGUCAACCGUCCAA 3'  
:::: ::::::::::::::::::::  
query 3' CAAGAUUCAGUUGGCAGGUU 5'  
query=miR5185l-3p, target=R03G\_11528, score=1, range=65-84, stran  
target 5' GUUCCAAGUCAACCGUCCAA 3'  
:::: ::::::::::::::::::::  
query 3' CAAGAUUCAGUUGGCAGGUU 5'  
query=miR5185l-3p, target=R03G\_01951, score=1, range=740-759, str  
target 5' GUUCCAAGUCAACCGUCCAA 3'  
:::: ::::::::::::::::::::  
query 3' CAAGAUUCAGUUGGCAGGUU 5'  
query=miR5185l-3p, target=R03G\_11244, score=1, range=740-759, str  
target 5' GUUCCAAGUCAACCGUCCAA 3'  
:::: ::::::::::::::::::::  
query 3' CAAGAUUCAGUUGGCAGGUU 5'  
query=miR5185l-3p, target=R03G\_01313, score=1, range=740-759, str  
target 5' GUUCCAAGUCAACCGUCCAA 3'  
:::: ::::::::::::::::::::  
query 3' CAAGAUUCAGUUGGCAGGUU 5'  
query=miR5185l-3p, target=R03G\_01194, score=1, range=740-759, str  
target 5' GUUCCAAGUCAACCGUCCAA 3'  
:::: ::::::::::::::::::::  
query 3' CAAGAUUCAGUUGGCAGGUU 5'  
query=miR5185l-3p, target=R03G\_10044, score=1, range=740-759, str  
target 5' GUUCCAAGUCAACCGUCCAA 3'  
:::: ::::::::::::::::::::  
query 3' CAAGAUUCAGUUGGCAGGUU 5'  
query=miR5185l-3p, target=R03G\_11534, score=1, range=740-759, str  
target 5' GUUCCAAGUCAACCGUCCAA 3'  
:::: ::::::::::::::::::::  
query 3' CAAGAUUCAGUUGGCAGGUU 5'  
query=miR5185l-3p, target=R03G\_03987, score=1, range=740-759, str  
target 5' GUUCCAAGUCAACCGUCCAA 3'  
:::: ::::::::::::::::::::  
query 3' CAAGAUUCAGUUGGCAGGUU 5'  
query=miR5185l-3p, target=R03G\_15873, score=1, range=740-759, str  
target 5' GUUCCAAGUCAACCGUCCAA 3'  
:::: ::::::::::::::::::::  
query 3' CAAGAUUCAGUUGGCAGGUU 5'  
query=miR5185l-3p, target=R03G\_10720, score=1, range=740-759, str  
target 5' GUUCCAAGUCAACCGUCCAA 3'

:::: ::::::::::::::  
query 3' CAAGAUUCAGUUGGCAGGUU 5'  
query=miR5185l-3p, target=R03G\_05916, score=1, range=740-759, str  
target 5' GUUCCAAGUCAACCGUCCAA 3'  
:::: ::::::::::::::  
query 3' CAAGAUUCAGUUGGCAGGUU 5'  
query=miR5185l-3p, target=R03G\_07994, score=1, range=740-759, str  
target 5' GUUCCAAGUCAACCGUCCAA 3'  
:::: ::::::::::::::  
query 3' CAAGAUUCAGUUGGCAGGUU 5'  
query=miR5185l-3p, target=R03G\_07683, score=1, range=740-759, str  
target 5' GUUCCAAGUCAACCGUCCAA 3'  
:::: ::::::::::::::  
query 3' CAAGAUUCAGUUGGCAGGUU 5'  
query=miR5185l-3p, target=R03G\_16118, score=1, range=8-27, strand  
target 5' GUUCCAAGUCAACCGUCCAA 3'  
:::: ::::::::::::::  
query 3' CAAGAUUCAGUUGGCAGGUU 5'  
query=miR5185l-3p, target=R03G\_01735, score=1, range=740-759, str  
target 5' GUUCCAAGUCAACCGUCCAA 3'  
:::: ::::::::::::::  
query 3' CAAGAUUCAGUUGGCAGGUU 5'  
query=miR5185l-3p, target=R03G\_11263, score=2, range=65-84, stran  
target 5' GUUCCAAGUCAGCCGUCCAA 3'  
:::: ::::::::::::::  
query 3' CAAGAUUCAGUUGGCAGGUU 5'  
query=miR5185l-3p, target=R03G\_13706, score=2, range=698-717, str  
target 5' GUUCCAAGUCAGCCGUCCAA 3'  
:::: ::::::::::::::  
query 3' CAAGAUUCAGUUGGCAGGUU 5'  
query=miR5185l-3p, target=R03G\_12526, score=2, range=740-759, str  
target 5' GUUCCAAGUCAGCCGUCCAA 3'  
:::: ::::::::::::::  
query 3' CAAGAUUCAGUUGGCAGGUU 5'  
query=miR5185l-3p, target=R03G\_03558, score=2, range=740-759, str  
target 5' GUUCCAAGUCAACUGUCCAA 3'  
:::: ::::::::::::::  
query 3' CAAGAUUCAGUUGGCAGGUU 5'  
query=miR5185l-3p, target=R03G\_13447, score=2, range=740-759, str  
target 5' GUUCCAAGUCAACUGUCCAA 3'  
:::: ::::::::::::::  
query 3' CAAGAUUCAGUUGGCAGGUU 5'  
query=miR5185l-3p, target=R03G\_17409, score=2, range=740-759, str  
target 5' GUUCCAAGUCAGCCGUCCAA 3'  
:::: ::::::::::::::



query 3' CAAGAUUCAGUUGGCAGGUU 5'  
query=miR5185l-3p, target=R03G\_15154, score=2, range=740-759, str  
target 5' GUUCCAAGUCAGCCGUCCAA 3'  
:::: ::::::::::::::::::::

query 3' CAAGAUUCAGUUGGCAGGUU 5'  
query=miR5185l-3p, target=R03G\_12174, score=2, range=65-84, stran  
target 5' GUUCCAAGUCAGCCGUCCAA 3'  
:::: ::::::::::::::::::::

query 3' CAAGAUUCAGUUGGCAGGUU 5'  
query=miR5185l-3p, target=R03G\_17213, score=2, range=65-84, stran  
target 5' GUUCCAAGUCAGCCGUCCAA 3'  
:::: ::::::::::::::::::::

query 3' CAAGAUUCAGUUGGCAGGUU 5'  
query=miR5185l-3p, target=R03G\_03617, score=2, range=740-759, str  
target 5' GUUCCAAGUCAACUGUCCAA 3'  
:::: ::::::::::::::::::::

query 3' CAAGAUUCAGUUGGCAGGUU 5'  
query=miR5185l-3p, target=R03G\_17211, score=2, range=740-759, str  
target 5' GUUCCAAGUCAGCCGUCCAA 3'  
:::: ::::::::::::::::::::

query 3' CAAGAUUCAGUUGGCAGGUU 5'  
query=miR5185l-3p, target=R03G\_08835, score=3, range=50-69, stran  
target 5' GUUCCAAGUCAACCAUCCAA 3'  
:::: ::::::::::::::::::::

query 3' CAAGAUUCAGUUGGCAGGUU 5'  
query=miR5185l-3p, target=R03G\_16377, score=4, range=65-84, stran  
target 5' GUUCCAAGUCAACAGUUCAA 3'  
:::: ::::::::::::::::::::

query 3' CAAGAUUCAGUUGGCAGGUU 5'  
query=miR5185l-3p, target=R03G\_07465, score=4, range=1455-1474,  
strand=1  
target 5' AUUCUAUGUCAACCAUCCAA 3'  
::::: ::::::::::::::::::::

query 3' CAAGAUUCAGUUGGCAGGUU 5'  
query=miR5185l-3p, target=R03G\_00951, score=4, range=1834-1853,  
strand=1  
target 5' CUUCAACGUCAAUCGUCCAA 3'  
::: : ::::::::::::::::::::

query 3' CAAGAUUCAGUUGGCAGGUU 5'  
query=miR5185l-3p, target=R03G\_12994, score=4, range=31-50, stran  
target 5' GAUAAAAGUCAACUCCAA 3'  
: : ::::::::::::::::::::

query 3' CAAGAUUCAGUUGGCAGGUU 5'  
query=miR6274b-3p, target=R03G\_13001, score=0, range=2234-2253,  
strand=1

```

target 5' CUAUUUUCGGUCUACCACAA 3'
::::::::::::::::::::::::::
query 3' GAUAAAAGCCAGAUGGUGUU 5'
query=miR6274b-3p, target=R03G_06596, score=0, range=2234-2253,
strand=1
target 5' CUAUUUUCGGUCUACCACAA 3'
::::::::::::::::::::::::::
query 3' GAUAAAAGCCAGAUGGUGUU 5'
query=miR6274b-3p, target=R03G_03002, score=0, range=2234-2253,
strand=1
target 5' CUAUUUUCGGUCUACCACAA 3'
::::::::::::::::::::::::::
query 3' GAUAAAAGCCAGAUGGUGUU 5'
query=miR6274b-3p, target=R03G_15390, score=0, range=524-543, str
target 5' CUAUUUUCGGUCUACCACAA 3'
::::::::::::::::::::::::::
query 3' GAUAAAAGCCAGAUGGUGUU 5'
query=miR6274b-3p, target=R03G_10503, score=1, range=170-189, str
target 5' CUAUUUCGGUCUACCACAA 3'
::::: ::::::::::::::::::::
query 3' GAUAAAAGCCAGAUGGUGUU 5'
query=miR6274b-3p, target=R03G_02145, score=4, range=116-135, str
target 5' GUAUUCCGAUCUACCACAA 3'
::::: ::::::::::::::::::::
query 3' GAUAAAAGCCAGAUGGUGUU 5'
query=miR6274b-3p, target=R03G_11963, score=4, range=170-189, str
target 5' CUAUCCCGAUCUACCACAA 3'
::::: ::::::::::::::::::::
query 3' GAUAAAAGCCAGAUGGUGUU 5'
query=miR8126-3p, target=R03G_15431, score=3.5, range=797-819,
strand=1
target 5' CUCUGAUAGACAAGUAUAUUGAG 3'
::::: ::::::::::::::::::::
query 3' GAGACUA-CUGUUUAUAUGACUU 5'
query=miR8126-3p, target=R03G_10563, score=4, range=3-24, strand=
target 5' GUCUGAUGACGAUUAUACUGAA 3'
::::: ::::::::::::::::::::
query 3' GAGACUACUGUUUAUAUGACUU 5'
query=miR8126-3p, target=R03G_04045, score=4, range=269-290, stra
target 5' CUCUGAGGAGGAAUAUACUGAA 3'
::::: ::::::::::::::::::::
query 3' GAGACUACUGUUUAUAUGACUU 5'
query=miR8126-3p, target=R03G_02673, score=4, range=773-794, stra
target 5' UUUUGCGGACAAUAUACUGAU 3'
::::: ::::::::::::::::::::

```



query 3' CCAUUAGGGUGGACUGAAG 5'  
query=miR2111-3p, target=R03G\_06346, score=4, range=258-276, str  
target 5' GGUAAACCCAUCUGAGUUC 3'  
::::: ::::::::::: :::  
query 3' CCAUUAGGGUGGACUGAAG 5'  
query=miR2111-3p, target=R03G\_16693, score=4, range=414-433, str  
target 5' UGUCAUCCCACCUGACCUUC 3'  
:: ::::::::::: ::::  
query 3' CCAUUAGGGUGGACU-GAAG 5'  
query=miR2111-3p, target=R03G\_12527, score=4, range=414-433, str  
target 5' UGUUAUCCCACCUGACCUUC 3'  
:: ::::::::::: ::::  
query 3' CCAUUAGGGUGGACU-GAAG 5'  
query=miR2111-3p, target=R03G\_07311, score=4, range=414-433, str  
target 5' UGUCAUCCCACCUGACCUUC 3'  
:: ::::::::::: ::::  
query 3' CCAUUAGGGUGGACU-GAAG 5'  
query=miR2111-3p, target=R03G\_01614, score=4, range=414-433, str  
target 5' UGUCAUCCCACCUGACCUUC 3'  
:: ::::::::::: ::::  
query 3' CCAUUAGGGUGGACU-GAAG 5'  
query=miR2111-3p, target=R03G\_10804, score=4, range=414-433, str  
target 5' UGUCAUCCCACCUGACCUUC 3'  
:: ::::::::::: ::::  
query 3' CCAUUAGGGUGGACU-GAAG 5'  
query=miR2111-3p, target=R03G\_12532, score=4, range=414-433, str  
target 5' UGUCAUCCCACCUGACCUUC 3'  
:: ::::::::::: ::::  
query 3' CCAUUAGGGUGGACU-GAAG 5'  
query=miR2111-3p, target=R03G\_01936, score=4, range=414-433, str  
target 5' UGUCAUCCCACCUGACCUUC 3'  
:: ::::::::::: ::::  
query 3' CCAUUAGGGUGGACU-GAAG 5'  
query=miR2111-3p, target=R03G\_03619, score=4, range=414-433, str  
target 5' UGUCAUCCCACCUGACCUUC 3'  
:: ::::::::::: ::::  
query 3' CCAUUAGGGUGGACU-GAAG 5'  
query=miR2111-3p, target=R03G\_02821, score=4, range=414-433, str  
target 5' UGUCAUCCCACCUGACCUUC 3'  
:: ::::::::::: ::::  
query 3' CCAUUAGGGUGGACU-GAAG 5'  
query=miR2111-3p, target=R03G\_00242, score=4, range=414-433, str  
target 5' UGUCAUCCCACCUGACCUUC 3'  
:: ::::::::::: ::::  
query 3' CCAUUAGGGUGGACU-GAAG 5'



target 5' GAUAAUGCACCUUAUCGAGACCA 3'  
: :::::::::::::::::::::  
query 3' CAAUUACGUGGAAUAGCUCUGGU 5'  
query=miR825-3p, target=R03G\_14979, score=1, range=493-515, stran  
target 5' GAUAAUGCACCUUAUCGAGACCA 3'  
: :::::::::::::::::::::  
query 3' CAAUUACGUGGAAUAGCUCUGGU 5'  
query=miR825-3p, target=R03G\_17276, score=1.5, range=583-605, str  
target 5' GAUAAUGCACCUUAUCGAGACCG 3'  
: :::::::::::::::::::::  
query 3' CAAUUACGUGGAAUAGCUCUGGU 5'  
query=miR825-3p, target=R03G\_05420, score=2, range=354-376, stran  
target 5' GGAAAUGCACCUUAUCGAGACCA 3'  
: :::::::::::::::::::::  
query 3' CAAUUACGUGGAAUAGCUCUGGU 5'  
query=miR825-3p, target=R03G\_13755, score=2, range=493-515, stran  
target 5' GAUAAUGAACCUUAUCGAGACCA 3'  
: ::::: :::::::::::::::::::::  
query 3' CAAUUACGUGGAAUAGCUCUGGU 5'  
query=miR825-3p, target=R03G\_17249, score=3, range=493-515, stran  
target 5' GAUAAUGCACCUUUUCGAGACCA 3'  
: ::::::::::::::: :::::::::::::::  
query 3' CAAUUACGUGGAAUAGCUCUGGU 5'  
query=miR5081, target=R03G\_10245, score=3.5, range=546-567, stran  
target 5' AGAUAAAGAUUUUACAAAUUCA 3'  
:: :: .:::::::::::::::::::  
query 3' UC-AUAGUUAAAAUGUUUAAGU 5'  
query=miR5081, target=R03G\_13517, score=3.5, range=24-43, strand=  
target 5' AGUAUU-CUUUUACAAGUUCA 3'  
: ::::: .:::::::::::::::::::  
query 3' UCAUAGUUAAAAUGUUUAAGU 5'  
query=miR5081, target=R03G\_02815, score=3.5, range=780-799, stran  
target 5' CGUAUU-CUUUUACAAAUUCA 3'  
: ::::: .:::::::::::::::::::  
query 3' UCAUAGUUAAAAUGUUUAAGU 5'  
query=miR5081, target=R03G\_01688, score=4, range=1297-1317, stran  
target 5' GGUAUCAUUUUACACGUUCG 3'  
.::::::::::::::::::: .:::::  
query 3' UCAUAGUUAAAAUGUUUAAGU 5'  
query=miR5081, target=R03G\_00403, score=4, range=4229-4249, stran  
target 5' GCGGUCAAUUUUUAUAAAUUCA 3'  
. .:::::::::::::::::::  
query 3' UCAUAGUUAAAAUGUUUAAGU 5'  
query=miR5081, target=R03G\_15599, score=4, range=178-198, strand=  
target 5' UGUUUUUUUUUACUAAUUCG 3'

```
.....
query 3' UCAUAGUUAAAAUGUUUAAGU 5'
query=miR5081, target=R03G_10909, score=4, range=66-87, strand=-1
target 5' AGAUAUCCAUUUUUAUGAAUUCA 3'
:: :::: ::::::::::::::
query 3' UC-AUAGUUAAAAUGUUUAAGU 5'
query=miR5081, target=R03G_01802, score=4, range=894-914, strand=
target 5' AAUAUCUCUUUUUAUAAAUUCA 3'
: :::: ::::::::::::::
query 3' UCAUAGUUAAAAUGUUUAAGU 5'
query=miR5081, target=R03G_10971, score=4, range=4119-4140, stran
target 5' AAUAGGAAUUUUUACAAAUUCA 3'
: :: :: ::::::::::::::
query 3' UCAUAGUU-AAAAUGUUUAAGU 5'
query=miR6459a-3p, target=R03G_10991, score=0, range=1101-1120,
strand=1
target 5' UCAAUUCAAGCCCAAUCAA 3'
::::::::::::
query 3' AGUUAAGUUCGGGUUUAGUU 5'
query=miR6459a-3p, target=R03G_15573, score=0, range=1101-1120,
strand=1
target 5' UCAAUUCAAGCCCAAUCAA 3'
::::::::::::
query 3' AGUUAAGUUCGGGUUUAGUU 5'
query=miR6459a-3p, target=R03G_02708, score=0, range=834-853, str
target 5' UCAAUUCAAGCCCAAUCAA 3'
::::::::::::
query 3' AGUUAAGUUCGGGUUUAGUU 5'
query=miR6459a-3p, target=R03G_06502, score=0, range=1101-1120,
strand=1
target 5' UCAAUUCAAGCCCAAUCAA 3'
::::::::::::
query 3' AGUUAAGUUCGGGUUUAGUU 5'
query=miR6459a-3p, target=R03G_02966, score=0, range=372-391, str
target 5' UCAAUUCAAGCCCAAUCAA 3'
::::::::::::
query 3' AGUUAAGUUCGGGUUUAGUU 5'
query=miR6459a-3p, target=R03G_16376, score=0, range=1026-1045,
strand=1
target 5' UCAAUUCAAGCCCAAUCAA 3'
::::::::::::
query 3' AGUUAAGUUCGGGUUUAGUU 5'
query=miR6459a-3p, target=R03G_01056, score=2, range=1008-1027,
strand=1
target 5' UCAAUUCAAGCCUAAGUCA 3'
```

query 3' AGUUAAGUUCGGGUUUAGUU 5'  
query=miR6459a-3p, target=R03G\_04662, score=2, range=953-972, str  
target 5' UCAAUUCAAGCCUAAGUCA 3'

query 3' AGUUAAGUUCGGGUUUAGUU 5'  
query=miR6459a-3p, target=R03G\_03749, score=3, range=1101-1120,  
strand=1  
target 5' UCAAUUCAAGCCGAAGUCA 3'

query 3' AGUUAAGUUCGGGUUUAGUU 5'  
query=miR6459a-3p, target=R03G\_17287, score=3, range=1101-1120,  
strand=1  
target 5' UCAAUUCAAGCCGAAGUCA 3'

query 3' AGUUAAGUUCGGGUUUAGUU 5'  
query=miR6459a-3p, target=R03G\_01944, score=3, range=1101-1120,  
strand=1  
target 5' UCAAUUCAAGCCGAAGUCA 3'

query 3' AGUUAAGUUCGGGUUUAGUU 5'  
query=miR6459a-3p, target=R03G\_13849, score=3, range=1101-1120,  
strand=1  
target 5' UCAAUUCAAGCCGAAGUCA 3'

query 3' AGUUAAGUUCGGGUUUAGUU 5'  
query=miR6459a-3p, target=R03G\_10420, score=3, range=1101-1120,  
strand=1  
target 5' UCAAUUCAAGCCGAAGUCA 3'

query 3' AGUUAAGUUCGGGUUUAGUU 5'  
query=miR6459a-3p, target=R03G\_01733, score=3, range=1101-1120,  
strand=1  
target 5' UCAAUUCAAGCCGAAGUCA 3'

query 3' AGUUAAGUUCGGGUUUAGUU 5'  
query=miR6459a-3p, target=R03G\_05865, score=3, range=1101-1120,  
strand=1  
target 5' UCAAUUCAAGCCGAAGUCA 3'

query 3' AGUUAAGUUCGGGUUUAGUU 5'  
query=miR6459a-3p, target=R03G\_17446, score=3, range=1101-1120,  
strand=1  
target 5' UCAAUUCAAGCCGAAGUCA 3'









query 3' CUUCUUCUCUCGUCGCUGUU 5'  
query=miR529a, target=R03G\_04603, score=3, range=73-93, strand=1  
target 5' GAAGAAGAAGAGCAGCAACAA 3'

query 3' CUUCUUC-UCUCGUCGCUGUU 5'  
query=miR529a, target=R03G\_13647, score=3, range=11-30, strand=-1  
target 5' GAUGAAAAGAGCAGCGAUAA 3'

query 3' CUUCUUCUCUCGUCGCUGUU 5'  
query=miR529a, target=R03G\_15451, score=3.5, range=1558-1576, str  
target 5' GAAG-AGAGAGCAGUGGCAG 3'

query 3' CUUCUUCUCUCGUCGCUGUU 5'  
query=miR529a, target=R03G\_13394, score=4, range=150-169, strand=  
target 5' GAAAAAGAGAGUAGUGACAC 3'

query 3' CUUCUUCUCUCGUCGCUGUU 5'  
query=miR529a, target=R03G\_05374, score=4, range=181-199, strand=  
target 5' GAAGAA-AGACCAGCGAUAA 3'

query 3' CUUCUUCUCUCGUCGCUGUU 5'  
query=miR529a, target=R03G\_08150, score=4, range=73-93, strand=1  
target 5' AAAGAAGCAGAGCAGCAACAA 3'

query 3' CUUCUUC-UCUCGUCGCUGUU 5'  
query=miR529a, target=R03G\_11952, score=4, range=2965-2984, stran  
target 5' GAAGAAGACAGCAGAGACAA 3'

query 3' CUUCUUCUCUCGUCGCUGUU 5'  
query=miR529a, target=R03G\_12964, score=4, range=2587-2606, stran  
target 5' GAAGAAGACAGCAGAGACAA 3'

query 3' CUUCUUCUCUCGUCGCUGUU 5'  
query=miR529a, target=R03G\_13746, score=4, range=1441-1460, stran  
target 5' GAAGAAGACAGCAGAGACAA 3'

query 3' CUUCUUCUCUCGUCGCUGUU 5'  
query=miR529a, target=R03G\_00686, score=4, range=310-329, strand=  
target 5' GAAGAAGACAGCAGAGACAA 3'

query 3' CUUCUUCUCUCGUCGCUGUU 5'  
query=miR529a, target=R03G\_07209, score=4, range=902-921, strand=  
target 5' CAAGAAAGGAGCAGCGACAU 3'





target 5' AUACGAAGACA-AGAAGUU 3'  
:::: ::::: :::::  
query 3' UAUGGUUCUGUCUCUUCAU 5'  
query=miR9492, target=R03G\_07862, score=4, range=2058-2077, stran  
target 5' CUACCAAAGGCAGAGGAGUA 3'  
:::: ::::: :::::  
query 3' UAUGG-UUCUGUCUCUUCAU 5'  
query=miR9492, target=R03G\_10744, score=4, range=1947-1966, stran  
target 5' CUACCAAAGGCAGAGGAGUA 3'  
:::: ::::: :::::  
query 3' UAUGG-UUCUGUCUCUUCAU 5'  
query=miR9492, target=R03G\_10745, score=4, range=915-934, strand=  
target 5' CUACCAAAGGCAGAGGAGUA 3'  
:::: ::::: :::::  
query 3' UAUGG-UUCUGUCUCUUCAU 5'  
query=miR9492, target=R03G\_16029, score=4, range=738-755, strand=  
target 5' GUACCGAGAUAGA-AAGUA 3'  
.::::: :::::  
query 3' UAUGGUUCUGUCUCUUCAU 5'  
query=miR9492, target=R03G\_04232, score=4, range=698-715, strand=  
target 5' AUA-CAUGACAGAGAGGUA 3'  
::: :: ::::: :::::  
query 3' UAUGGUUCUGUCUCUUCAU 5'  
query=miR7542, target=R03G\_01330, score=0, range=378-397, strand=  
target 5' UACCAUCUAUGAACGCAACA 3'  
::::: ::::: :::::  
query 3' AUGGUAGAUACUUGCGUUGU 5'  
query=miR7542, target=R03G\_06428, score=0.5, range=2238-2257,  
strand=-1  
target 5' UAUCAUCUAUGAACGCAACA 3'  
::::: ::::: :::::  
query 3' AUGGUAGAUACUUGCGUUGU 5'  
query=miR7542, target=R03G\_02222, score=0.5, range=198-217, stran  
target 5' UAUCAUCUAUGAACGCAACA 3'  
::::: ::::: :::::  
query 3' AUGGUAGAUACUUGCGUUGU 5'  
query=miR7542, target=R03G\_02959, score=0.5, range=3144-3163,  
strand=-1  
target 5' UAUCAUCUAUGAACGCAACA 3'  
::::: ::::: :::::  
query 3' AUGGUAGAUACUUGCGUUGU 5'  
query=miR7542, target=R03G\_05619, score=0.5, range=1287-1306,  
strand=-1  
target 5' UAUCAUCUAUGAACGCAACA 3'  
::::: ::::: :::::

query 3' AUGGUAGAUACUUGCGUUGU 5'  
query=miR7542, target=R03G\_06427, score=0.5, range=2736-2755,  
strand=-1  
target 5' UAUCAUCUAUGAACGCAACA 3'  
.....  
query 3' AUGGUAGAUACUUGCGUUGU 5'  
query=miR7542, target=R03G\_09965, score=0.5, range=3144-3163,  
strand=-1  
target 5' UAUCAUCUAUGAACGCAACA 3'  
.....  
query 3' AUGGUAGAUACUUGCGUUGU 5'  
query=miR7542, target=R03G\_13920, score=0.5, range=3144-3163,  
strand=-1  
target 5' UAUCAUCUAUGAACGCAACA 3'  
.....  
query 3' AUGGUAGAUACUUGCGUUGU 5'  
query=miR7542, target=R03G\_03547, score=0.5, range=3144-3163,  
strand=-1  
target 5' UAUCAUCUAUGAACGCAACA 3'  
.....  
query 3' AUGGUAGAUACUUGCGUUGU 5'  
query=miR7542, target=R03G\_02691, score=0.5, range=6633-6652,  
strand=-1  
target 5' UAUCAUCUAUGAACGCAACA 3'  
.....  
query 3' AUGGUAGAUACUUGCGUUGU 5'  
query=miR7542, target=R03G\_06442, score=0.5, range=3801-3820,  
strand=-1  
target 5' UAUCAUCUAUGAACGCAACA 3'  
.....  
query 3' AUGGUAGAUACUUGCGUUGU 5'  
query=miR7542, target=R03G\_11776, score=1.5, range=234-253, stran  
target 5' UAUCAUCUAUGAAUGCAACA 3'  
.....  
query 3' AUGGUAGAUACUUGCGUUGU 5'  
query=miR7542, target=R03G\_13867, score=1.5, range=3060-3079,  
strand=-1  
target 5' UAUCAUCUAUGAAUGCAACA 3'  
.....  
query 3' AUGGUAGAUACUUGCGUUGU 5'  
query=miR7542, target=R03G\_13749, score=1.5, range=1707-1726,  
strand=-1  
target 5' UAUCAUCUAUGAAUGCAACA 3'  
.....  
query 3' AUGGUAGAUACUUGCGUUGU 5'



query=miR7542, target=R03G\_04115, score=1.5, range=87-106, strand  
target 5' UAUCAUCUAUGAAUGCAACA 3'  
.....  
query 3' AUGGUAGAUACUUGCGUUGU 5'  
query=miR7542, target=R03G\_01613, score=1.5, range=1395-1414,  
strand=-1  
target 5' UAUCAUCUAUGAAUGCAACA 3'  
.....  
query 3' AUGGUAGAUACUUGCGUUGU 5'  
query=miR7542, target=R03G\_10558, score=1.5, range=897-916, stran  
target 5' UAUCAUCUAUGAAUGCAACA 3'  
.....  
query 3' AUGGUAGAUACUUGCGUUGU 5'  
query=miR7542, target=R03G\_17326, score=1.5, range=2976-2995,  
strand=-1  
target 5' UAUCAUCUAUGAAUGCAACA 3'  
.....  
query 3' AUGGUAGAUACUUGCGUUGU 5'  
query=miR7542, target=R03G\_14355, score=1.5, range=1350-1369,  
strand=-1  
target 5' UAUCAUCUAUGAAUGCAACA 3'  
.....  
query 3' AUGGUAGAUACUUGCGUUGU 5'  
query=miR7542, target=R03G\_05279, score=1.5, range=90-109, strand  
target 5' UAUCAUCUAUGAAUGCAACA 3'  
.....  
query 3' AUGGUAGAUACUUGCGUUGU 5'  
query=miR7542, target=R03G\_17371, score=1.5, range=3099-3118,  
strand=-1  
target 5' UAUCAUCUAUGAAUGCAACA 3'  
.....  
query 3' AUGGUAGAUACUUGCGUUGU 5'  
query=miR7542, target=R03G\_15250, score=1.5, range=3099-3118,  
strand=-1  
target 5' UAUCAUCUAUGAAUGCAACA 3'  
.....  
query 3' AUGGUAGAUACUUGCGUUGU 5'  
query=miR7542, target=R03G\_12788, score=3, range=348-366, strand=  
target 5' UACGA-CUAUGAACGCAAUA 3'  
... : .....  
query 3' AUGGUAGAUACUUGCGUUGU 5'  
query=miR7542, target=R03G\_13422, score=4, range=618-637, strand=  
target 5' UGCUGUCUAUGAACUCAACG 3'  
.....  
query 3' AUGGUAGAUACUUGCGUUGU 5'

query=miR7542, target=R03G\_12316, score=4, range=594-613, strand=  
target 5' UGCUGUCUAUGAACUCAACG 3'  
.....  
query 3' AUGGUAGAUACUUGCGUUGU 5'  
query=miR7542, target=R03G\_13406, score=4, range=594-613, strand=  
target 5' UGCUGUCUAUGAACUCAACG 3'  
.....  
query 3' AUGGUAGAUACUUGCGUUGU 5'  
query=miR7542, target=R03G\_01494, score=4, range=1754-1773, stran  
target 5' AAUUGUUUAUGAACGCAACC 3'  
.....  
query 3' AUGGUAGAUACUUGCGUUGU 5'  
query=miR7542, target=R03G\_11117, score=4, range=294-312, strand=  
target 5' UACCAUCUAUGAA-GUAGCA 3'  
.....  
query 3' AUGGUAGAUACUUGCGUUGU 5'  
query=miR7542, target=R03G\_02560, score=4, range=1093-1113, stran  
target 5' UGUCAUCUUAUGAAUGCAACU 3'  
.....  
query 3' AUGGUAG-AUACUUGCGUUGU 5'  
query=miR7542, target=R03G\_16285, score=4, range=53-72, strand=1  
target 5' UUCGAUCUAUGAAUGCAGCA 3'  
: : .....

query 3' AUGGUAGAUACUUGCGUUGU 5'  
query=miR7542, target=R03G\_17390, score=4, range=594-614, strand=  
target 5' UGCUACCUAUGAACGCAAGCA 3'  
.....

query 3' AUGGUAGAUACUUGCGUU-GU 5'  
query=miR7542, target=R03G\_02872, score=4, range=3755-3775, stran  
target 5' CACCAGUCUAUGAACGCAAUC 3'  
.....

query 3' AUGGU-AGAUACUUGCGUUGU 5'  
query=miR7542, target=R03G\_06268, score=4, range=140-160, strand=  
target 5' AACCUUCUAUGAACAGCAACA 3'  
.....

query 3' AUGGUAGAUACUUG-CGUUGU 5'  
query=miR7542, target=R03G\_15995, score=4, range=375-393, strand=  
target 5' UGCCAGCUAUGAA-GCAACG 3'  
.....

query 3' AUGGUAGAUACUUGCGUUGU 5'  
query=miR159a, target=R03G\_01784, score=3, range=322-341, strand=  
target 5' AGAAUUUCCUCAAUUCAAA 3'  
.....

query 3' UCUCGAGGGAAGUUAGGUUU 5'  
query=miR159a, target=R03G\_12083, score=3.5, range=46-65, strand=

target 5' AGAAGUCCUUCAAUCCAAG 3'  
::: :::::::::::::::  
query 3' UCUCGAGGGAAGUUAGGUUU 5'  
query=miR159a, target=R03G\_14268, score=3.5, range=37-55, strand=  
target 5' ACAGCU-UCUCAAUCCAAG 3'  
: :::: .:::::::::::::  
query 3' UCUCGAGGGAAGUUAGGUUU 5'  
query=miR159a, target=R03G\_02134, score=3.5, range=401-420, stran  
target 5' GGAGCUACAUAUCAAUCCAAA 3'  
.::::: : :::::::::::::::  
query 3' UCUCGAGGGAAGUUAGGUUU 5'  
query=miR159a, target=R03G\_00458, score=4, range=48-66, strand=1  
target 5' UGAGC-GCCUCAAUCCGAA 3'  
::::: :::::::::::::::  
query 3' UCUCGAGGGAAGUUAGGUUU 5'  
query=miR159a, target=R03G\_11680, score=4, range=801-819, strand=  
target 5' AGAGAU-CAUCAAUCCAAA 3'  
::::: : : :::::::::::::::  
query 3' UCUCGAGGGAAGUUAGGUUU 5'  
query=miR159a, target=R03G\_06157, score=4, range=667-687, strand=  
target 5' AGAGCUUUCUAUCGAUCCAAA 3'  
:::::.....: :::::::::::::::  
query 3' UCUCGAGGGA-AGUUAGGUUU 5'  
query=miR4244, target=R03G\_04497, score=1, range=221-240, strand=  
target 5' CACAUCUCCAGGAACAAUUA 3'  
:::::.....: :::::::::::::::  
query 3' GUGUAGAGGUCCUUGUUGAU 5'  
query=miR4244, target=R03G\_02365, score=1, range=221-240, strand=  
target 5' CACACCUCCAGGAACAACUA 3'  
::::: :::::::::::::::  
query 3' GUGUAGAGGUCCUUGUUGAU 5'  
query=miR4244, target=R03G\_13029, score=1, range=155-174, strand=  
target 5' CACAACUCCAGGAACAACUA 3'  
::::: :::::::::::::::  
query 3' GUGUAGAGGUCCUUGUUGAU 5'  
query=miR4244, target=R03G\_16979, score=1, range=71-90, strand=1  
target 5' CACACCUCCAGGAACAACUA 3'  
::::: :::::::::::::::  
query 3' GUGUAGAGGUCCUUGUUGAU 5'  
query=miR4244, target=R03G\_11695, score=1.5, range=221-240, stran  
target 5' CAUACCUCCAGGAACAACUA 3'  
:::.: :::::::::::::::  
query 3' GUGUAGAGGUCCUUGUUGAU 5'  
query=miR4244, target=R03G\_12568, score=2, range=464-483, strand=  
target 5' CACACCUUCAGGAACAACUA 3'

:::: ::::::::::::::  
query 3' GUGUAGAGGUCCUUGUUGAU 5'  
query=miR4244, target=R03G\_12482, score=4, range=617-637, strand=  
target 5' CAUUUUUCCAGGAACAACCA 3'  
:: :::::::::::::: :  
query 3' GU-GUAGAGGUCCUUGUUGAU 5'  
query=miR4244, target=R03G\_02714, score=4, range=705-723, strand=  
target 5' CACAU-UCAAGGAACAAUUA 3'  
::::: :: ::::::::::::::  
query 3' GUGUAGAGGUCCUUGUUGAU 5'  
query=miR4244, target=R03G\_03106, score=4, range=186-204, strand=  
target 5' UA-AUCGUCAGGAACAACUG 3'  
. : :: ::::::::::::::  
query 3' GUGUAGAGGUCCUUGUUGAU 5'  
query=miR4244, target=R03G\_13937, score=4, range=184-202, strand=  
target 5' CA-AACACCAGGAACAGCUA 3'  
:: : : ::::::::::::::  
query 3' GUGUAGAGGUCCUUGUUGAU 5'  
query=miR4244, target=R03G\_11363, score=4, range=911-930, strand=  
target 5' UACAGUUUCAGGAACAACUU 3'  
. : : ::::::::::::::  
query 3' GUGUAGAGGUCCUUGUUGAU 5'  
query=miR4244, target=R03G\_04292, score=4, range=1586-1606, stran  
target 5' UACAGCUUCCAGGAACAAUUG 3'  
. : : : ::::::::::::::  
query 3' GUGUAG-AGGUCCUUGUUGAU 5'  
query=miR2595, target=R03G\_15743, score=0, range=946-966, strand=  
target 5' AGACAGAGAAGUAGAAAUGUA 3'  
::::: ::::::::::::::  
query 3' UCUGUCUCUUCAUCUUUACAU 5'  
query=miR2595, target=R03G\_16060, score=4, range=18-38, strand=1  
target 5' AAAAAAGAAGUAGAAAUGUU 3'  
: : : ::::::::::::::  
query 3' UCUGUCUCUUCAUCUUUACAU 5'  
query=miR2595, target=R03G\_07199, score=4, range=98-119, strand=1  
target 5' AAAGAGAUGAAGUAGAAAUGUU 3'  
: : :: ::::::::::::::  
query 3' UCUGUCU-CUUCAUCUUUACAU 5'  
query=miR2595, target=R03G\_08289, score=4, range=26-45, strand=1  
target 5' AGAAAAAGAA-UAGAAAUGUA 3'  
::: : :: ::::::::::::::  
query 3' UCUGUCUCUUCAUCUUUACAU 5'  
query=miR2595, target=R03G\_11137, score=4, range=206-225, strand=  
target 5' AGAUA-AGAAGUAGACAUGUG 3'  
::::: :::::::::::::: : : : .

query 3' UCUGUCUCUUCAUCUUUACAU 5'  
query=miR6148b, target=R03G\_06693, score=2.5, range=66-83, strand  
target 5' UGUACCAAACAUAACAGG 3'  
:: : :::::::::::::::  
query 3' ACCUUGUUUGUAUUGUCU 5'  
query=miR6148b, target=R03G\_16582, score=2.5, range=256-273, stra  
target 5' AGGAGCAAUAUAACAGA 3'  
:::::::::::  
query 3' ACCUUGUUUGUAUUGUCU 5'  
query=miR6148b, target=R03G\_02259, score=3, range=1633-1651, stra  
target 5' UGGAACAAUAUAUCAGA 3'  
:::::::::::  
query 3' ACCUUGUUUGUAUU-GUCU 5'  
query=miR6148b, target=R03G\_13408, score=3, range=43-60, strand=1  
target 5' AUGGGCAAACAUAACAGA 3'  
.....  
query 3' ACCUUGUUUGUAUUGUCU 5'  
query=miR6148b, target=R03G\_16217, score=3, range=2122-2139, stra  
target 5' UUGAAUAAACAUAACAGC 3'  
: :::::::::::::::  
query 3' ACCUUGUUUGUAUUGUCU 5'  
query=miR6148b, target=R03G\_01753, score=3, range=749-765, strand  
target 5' UAGAACAACAUA-ACAGA 3'  
: :::::::::::::::  
query 3' ACCUUGUUUGUAUUGUCU 5'  
query=miR6148b, target=R03G\_03392, score=3.5, range=208-225, stra  
target 5' UGGGACAAACAUAUCGGA 3'  
:::::::::::  
query 3' ACCUUGUUUGUAUUGUCU 5'  
query=miR6148b, target=R03G\_14433, score=3.5, range=4312-4329,  
strand=-1  
target 5' UGUAGCAAACAUAAGUAGA 3'  
:: : :::::::::::::::  
query 3' ACCUUGUUUGUAUUGUCU 5'  
query=miR6148b, target=R03G\_12831, score=3.5, range=655-673, stra  
target 5' UGGCAGCAAUAUAGCAGA 3'  
::: : :::::::::::::::  
query 3' ACC-UUGUUUGUAUUGUCU 5'  
query=miR6148b, target=R03G\_07832, score=3.5, range=55-72, strand  
target 5' AGAGACAAACAUAUAUAGA 3'  
: . :::::::::::::::  
query 3' ACCUUGUUUGUAUUGUCU 5'  
query=miR6148b, target=R03G\_08867, score=3.5, range=23-39, strand  
target 5' UGCGACAAACA-AACAGA 3'  
:: : :::::::::::::::

query 3' ACCUUGUUUGUAUUGUCU 5'  
query=miR6148b, target=R03G\_09626, score=3.5, range=318-336, strand  
target 5' UCGAGCAACACAUAACAGA 3'  
: ::::: ::::: :::::  
query 3' ACCUUGUU-UGUAUUGUCU 5'  
query=miR6148b, target=R03G\_05800, score=4, range=397-413, strand  
target 5' UGGAACGAACA-AACGGA 3'  
::::: :::::  
query 3' ACCUUGUUUGUAUUGUCU 5'  
query=miR6148b, target=R03G\_09803, score=4, range=997-1014, strand  
target 5' CUUAACAAUAUAACAGA 3'  
::::: :::::  
query 3' ACCUUGUUUGUAUUGUCU 5'  
query=miR6148b, target=R03G\_03474, score=4, range=450-467, strand  
target 5' AUCAAUAAACAUAACAGA 3'  
::::: :::::  
query 3' ACCUUGUUUGUAUUGUCU 5'  
query=miR6148b, target=R03G\_06487, score=4, range=814-830, strand  
target 5' UGGGAUAAACAU-ACAGG 3'  
::::: :::::  
query 3' ACCUUGUUUGUAUUGUCU 5'  
query=miR6148b, target=R03G\_05297, score=4, range=2586-2603, strand  
target 5' UAAAACAAGCAUGACAGA 3'  
: ::::: :::::  
query 3' ACCUUGUUUGUAUUGUCU 5'  
query=miR6148b, target=R03G\_03447, score=4, range=829-846, strand  
target 5' UCAAACGAACAUAACGGA 3'  
: ::::: :::::  
query 3' ACCUUGUUUGUAUUGUCU 5'  
query=miR6148b, target=R03G\_03802, score=4, range=400-417, strand  
target 5' UACAAUAGACAUAACAGA 3'  
: ::::: :::::  
query 3' ACCUUGUUUGUAUUGUCU 5'  
query=miR6148b, target=R03G\_12527, score=4, range=57-74, strand=1  
target 5' UGAAACAAACAUAGAAGA 3'  
:: ::::: :::::  
query 3' ACCUUGUUUGUAUUGUCU 5'  
query=miR6148b, target=R03G\_10494, score=4, range=237-254, strand  
target 5' UGCAACAAUAUAACAAA 3'  
:: ::::: :::::  
query 3' ACCUUGUUUGUAUUGUCU 5'  
query=miR6148b, target=R03G\_17170, score=4, range=57-74, strand=1  
target 5' UGAAACAAACAUAGAAGA 3'  
:: ::::: :::::  
query 3' ACCUUGUUUGUAUUGUCU 5'

query=miR6148b, target=R03G\_09920, score=4, range=57-74, strand=1  
target 5' UGAAACAAACAUAGAAGA 3'  
:: ::::::::::: :::  
query 3' ACCUUGUUUGUAUUGUCU 5'  
query=miR6148b, target=R03G\_05519, score=4, range=57-74, strand=1  
target 5' UGAAACAAACAUAGAAGA 3'  
:: ::::::::::: :::  
query 3' ACCUUGUUUGUAUUGUCU 5'  
query=miR6148b, target=R03G\_05185, score=4, range=1021-1039, strand=1  
target 5' UGUGAACAAAGCAGAACAGA 3'  
:: ::::::::::: :::  
query 3' AC-CUUGUUUGUAUUGUCU 5'  
query=miR6148b, target=R03G\_14029, score=4, range=249-266, strand=1  
target 5' UUUGGCAAACAUGACAGA 3'  
: ..::::::::: :::  
query 3' ACCUUGUUUGUAUUGUCU 5'  
query=miR6148b, target=R03G\_08323, score=4, range=625-642, strand=1  
target 5' AAGAACAAACAUAACACA 3'  
::::::::: :::  
query 3' ACCUUGUUUGUAUUGUCU 5'  
query=miR6148b, target=R03G\_14174, score=4, range=3669-3686, strand=1  
target 5' UGAUACAAACAUGAUAGA 3'  
:: ::::::::::: :::  
query 3' ACCUUGUUUGUAUUGUCU 5'  
query=miR6148b, target=R03G\_06253, score=4, range=185-201, strand=1  
target 5' UGGAA-AAACAUAUAGU 3'  
::::: ::::::::::: :::  
query 3' ACCUUGUUUGUAUUGUCU 5'  
query=miR6148b, target=R03G\_12768, score=4, range=1347-1364, strand=1  
target 5' UACAACAAACAUAACGGU 3'  
: ::::::::::: :::  
query 3' ACCUUGUUUGUAUUGUCU 5'  
query=miR6148b, target=R03G\_11902, score=4, range=115-132, strand=1  
target 5' UGGUACAAACAUCACAGU 3'  
::: ::::::::::: :::  
query 3' ACCUUGUUUGUAUUGUCU 5'  
query=miR6148b, target=R03G\_00837, score=4, range=1393-1410, strand=1  
target 5' UUGAACAAACACAACAGC 3'  
: ::::::::::: :::  
query 3' ACCUUGUUUGUAUUGUCU 5'  
query=miR6148b, target=R03G\_13559, score=4, range=132-149, strand=1  
target 5' UUCAACAAACAUAACAAA 3'  
: ::::::::::: :::  
query 3' ACCUUGUUUGUAUUGUCU 5'  
query=miR6148b, target=R03G\_17187, score=4, range=864-880, strand=1

target 5' UGCGACAAACAU-ACAGG 3'  
:: .....  
query 3' ACCUUGUUUGUAUUGUCU 5'  
query=miR6148b, target=R03G\_06187, score=4, range=378-395, strand  
target 5' UCAAACAAUCAUACAGA 3'  
: .....  
query 3' ACCUUGUUUGUAUUGUCU 5'  
query=miR6148b, target=R03G\_01503, score=4, range=19-36, strand=1  
target 5' UGCAUCAACCAUACAGA 3'  
:: : : : .....  
query 3' ACCUUGUUUGUAUUGUCU 5'  
query=miR6148b, target=R03G\_09701, score=4, range=115-131, strand  
target 5' UUCAAC-AACAUAACAGA 3'  
: : : .....  
query 3' ACCUUGUUUGUAUUGUCU 5'  
query=miR6148b, target=R03G\_04288, score=4, range=473-489, strand  
target 5' AGGAACAGACA-AACAGA 3'  
: : : .....  
query 3' ACCUUGUUUGUAUUGUCU 5'  
query=miR6148b, target=R03G\_13667, score=4, range=74-90, strand=1  
target 5' UAAACAAACAU-ACAGA 3'  
: : : .....  
query 3' ACCUUGUUUGUAUUGUCU 5'  
query=miR6148b, target=R03G\_08814, score=4, range=158-175, strand  
target 5' UGGGGCAAGUAUACAGU 3'  
: : : .....  
query 3' ACCUUGUUUGUAUUGUCU 5'  
query=miR6148b, target=R03G\_15457, score=4, range=15-32, strand=-  
target 5' UGUAUAAAUGUAACAGA 3'  
: : : .....  
query 3' ACCUUGUUUGUAUUGUCU 5'  
query=miR6148b, target=R03G\_01056, score=4, range=1462-1479, stra  
target 5' UGUGGCAAUAUAAUAGA 3'  
: : : .....  
query 3' ACCUUGUUUGUAUUGUCU 5'  
query=miR6148b, target=R03G\_08994, score=4, range=863-880, strand  
target 5' UGGAUAAACAUAAGU 3'  
: : : .....  
query 3' ACCUUGUUUGUAUUGUCU 5'  
query=miR6148b, target=R03G\_00192, score=4, range=1738-1755, stra  
target 5' UGCAACAGACAUAGCAGC 3'  
: : : .....  
query 3' ACCUUGUUUGUAUUGUCU 5'  
query=miR6148b, target=R03G\_09465, score=4, range=1399-1416, stra  
target 5' AGGAUCAAUUAACAGA 3'



```

::: :::::::::::::::
query 3' ACCUUGUUUGUAUUGUCU 5'
query=miR6148b, target=R03G_13835, score=4, range=10657-10674,
strand=-1
target 5' UGCAACAGAAAUAACAGA 3'
:: ::::::: :::::::::::
query 3' ACCUUGUUUGUAUUGUCU 5'
query=miR6148b, target=R03G_04094, score=4, range=1516-1533, stra
target 5' UGCAACAGAAAUAACAGA 3'
:: ::::::: :::::::::::
query 3' ACCUUGUUUGUAUUGUCU 5'
query=miR6148b, target=R03G_16608, score=4, range=880-897, strand
target 5' UGGACCAAACAAGACAGA 3'
:::: ::::::: .:::::
query 3' ACCUUGUUUGUAUUGUCU 5'
query=miR6148b, target=R03G_16604, score=4, range=880-897, strand
target 5' UGGACCAAACAAGACAGA 3'
:::: ::::::: .:::::
query 3' ACCUUGUUUGUAUUGUCU 5'
query=miR6148b, target=R03G_10476, score=4, range=1127-1144, stra
target 5' CCCAACAAACAUAACAGC 3'
:::::::::::
query 3' ACCUUGUUUGUAUUGUCU 5'
query=miR6148b, target=R03G_07479, score=4, range=379-396, strand
target 5' UUGACCAAGCAUAACAGU 3'
: : :::::::
query 3' ACCUUGUUUGUAUUGUCU 5'
query=miR6148b, target=R03G_07765, score=4, range=737-753, strand
target 5' UGGCACAAUAUAA-AGA 3'
::: ::::::: :::
query 3' ACCUUGUUUGUAUUGUCU 5'
query=miR6148b, target=R03G_16036, score=4, range=1546-1563, stra
target 5' UUUACCAAACAUAAGCAGA 3'
: : :::::::
query 3' ACCUUGUUUGUAUUGUCU 5'
query=miR6148b, target=R03G_07543, score=4, range=265-282, strand
target 5' UGAAUCAAUCAUACAGA 3'
:: : ::: :::::::
query 3' ACCUUGUUUGUAUUGUCU 5'
query=miR1425-5p, target=R03G_07690, score=0, range=175-194, stra
target 5' AGCAGCAAGGAUGAUCAGUA 3'
:::::::::::
query 3' UCGUCGUUCCUACUAGUCAU 5'
query=miR1425-5p, target=R03G_00679, score=0, range=367-386, stra
target 5' AGCAGCAAGGAUGAUCAGUA 3'

```

query 3' UCGUCGUCCUACUAGUCAU 5'  
query=miR1425-5p, target=R03G\_07707, score=0, range=367-386, str  
target 5' AGCAGCAAGGAUGAUCAGUA 3'

query 3' UCGUCGUCCUACUAGUCAU 5'  
query=miR1425-5p, target=R03G\_11281, score=0, range=175-194, str  
target 5' AGCAGCAAGGAUGAUCAGUA 3'

query 3' UCGUCGUCCUACUAGUCAU 5'  
query=miR1425-5p, target=R03G\_16719, score=0, range=175-194, str  
target 5' AGCAGCAAGGAUGAUCAGUA 3'

query 3' UCGUCGUCCUACUAGUCAU 5'  
query=miR1425-5p, target=R03G\_16727, score=0, range=175-194, str  
target 5' AGCAGCAAGGAUGAUCAGUA 3'

query 3' UCGUCGUCCUACUAGUCAU 5'  
query=miR1425-5p, target=R03G\_17408, score=0, range=175-194, str  
target 5' AGCAGCAAGGAUGAUCAGUA 3'

query 3' UCGUCGUCCUACUAGUCAU 5'  
query=miR1425-5p, target=R03G\_03624, score=1, range=175-194, str  
target 5' AGCAGCAGGGAUGAUCAGUA 3'

query 3' UCGUCGUCCUACUAGUCAU 5'  
query=miR1425-5p, target=R03G\_01960, score=1, range=367-386, str  
target 5' AGCAGCAGGGAUGAUCAGUA 3'

query 3' UCGUCGUCCUACUAGUCAU 5'  
query=miR1425-5p, target=R03G\_16550, score=1, range=286-305, str  
target 5' AGCAGCAGGGAUGAUCAGUA 3'

query 3' UCGUCGUCCUACUAGUCAU 5'  
query=miR1425-5p, target=R03G\_02845, score=1, range=400-419, str  
target 5' AGCAGCAGGGAUGAUCAGUA 3'

query 3' UCGUCGUCCUACUAGUCAU 5'  
query=miR1425-5p, target=R03G\_03602, score=1, range=316-335, str  
target 5' AGCAGCAGGGAUGAUCAGUA 3'

query 3' UCGUCGUCCUACUAGUCAU 5'  
query=miR1425-5p, target=R03G\_02706, score=1, range=367-386, str  
target 5' AGCAGCAGGGAUGAUCAGUA 3'



```

query=miR1425-5p, target=R03G_15583, score=3, range=40-59, strand
target 5' AGCAGCAGCGAUGAUCAGUA 3'
::::: :
query 3' UCGUCGUUCCUACUAGUCAU 5'
query=miR1425-5p, target=R03G_08847, score=3, range=175-194, stra
target 5' AGCAGCAGGAAUGAUCAGUA 3'
::::: :
query 3' UCGUCGUUCCUACUAGUCAU 5'
query=miR1425-5p, target=R03G_12166, score=3, range=175-194, stra
target 5' AGCAGCAGCGAUGAUCAGUA 3'
::::: :
query 3' UCGUCGUUCCUACUAGUCAU 5'
query=miR1425-5p, target=R03G_12658, score=3, range=175-194, stra
target 5' AGCAGCAGCGAUGAUCAGUA 3'
::::: :
query 3' UCGUCGUUCCUACUAGUCAU 5'
query=miR1425-5p, target=R03G_03188, score=3.5, range=2990-3008,
strand=1
target 5' GGCAGC-AGGAUGAUCGGUC 3'
.: :
query 3' UCGUCGUUCCUACUAGUCAU 5'
query=miR1425-5p, target=R03G_00460, score=4, range=856-874, stra
target 5' AGUAGCAAGGAUGAU-GGUG 3'
.: :
query 3' UCGUCGUUCCUACUAGUCAU 5'
query=miR1425-5p, target=R03G_15033, score=4, range=578-598, stra
target 5' AGCGACGAGGAUGAUCCAGUA 3'
.: :
query 3' UCGUCGUUCCUACUA-GUCAU 5'
query=miR1425-5p, target=R03G_13880, score=4, range=968-988, stra
target 5' AGAAGCCAAGGAUGGUCAGUU 3'
.: :
query 3' UCGUC-GUUCCUACUAGUCAU 5'
query=miR1425-5p, target=R03G_06641, score=4, range=282-300, stra
target 5' AGCA-CAAGGAUGAUUAUUA 3'
.: :
query 3' UCGUCGUUCCUACUAGUCAU 5'
query=miR1425-5p, target=R03G_02515, score=4, range=360-378, stra
target 5' AGCA-UGAGGAUGAUCAGGA 3'
.: :
query 3' UCGUCGUUCCUACUAGUCAU 5'
query=miR1425-5p, target=R03G_07213, score=4, range=1079-1099,
strand=-1
target 5' AACAGGACAGGAUGAUCGGUA 3'
.: :

```

query 3' UCGUCGU-UCCUACUAGUCAU 5'  
query=miR6270, target=R03G\_03556, score=0, range=702-723, strand=  
target 5' AGAUGAAGAUUCCAAUAGCGAA 3'  
.....  
query 3' UCUACUUCUAAGGUUAUCGCUU 5'  
query=miR6270, target=R03G\_17281, score=0, range=138-159, strand=  
target 5' AGAUGAAGAUUCCAAUAGCGAA 3'  
.....  
query 3' UCUACUUCUAAGGUUAUCGCUU 5'  
query=miR6270, target=R03G\_16803, score=0, range=138-159, strand=  
target 5' AGAUGAAGAUUCCAAUAGCGAA 3'  
.....  
query 3' UCUACUUCUAAGGUUAUCGCUU 5'  
query=miR6270, target=R03G\_17374, score=0, range=138-159, strand=  
target 5' AGAUGAAGAUUCCAAUAGCGAA 3'  
.....  
query 3' UCUACUUCUAAGGUUAUCGCUU 5'  
query=miR6270, target=R03G\_03794, score=0, range=138-159, strand=  
target 5' AGAUGAAGAUUCCAAUAGCGAA 3'  
.....  
query 3' UCUACUUCUAAGGUUAUCGCUU 5'  
query=miR6270, target=R03G\_03780, score=0, range=138-159, strand=  
target 5' AGAUGAAGAUUCCAAUAGCGAA 3'  
.....  
query 3' UCUACUUCUAAGGUUAUCGCUU 5'  
query=miR6270, target=R03G\_03583, score=1, range=702-723, strand=  
target 5' AGAUGAAA AUUCCAAUAGCGAA 3'  
.....  
query 3' UCUACUUCUAAGGUUAUCGCUU 5'  
query=miR6270, target=R03G\_05930, score=2, range=561-582, strand=  
target 5' AGAUGAAGAUCCCAAUAGCGAA 3'  
.....  
query 3' UCUACUUCUAAGGUUAUCGCUU 5'  
query=miR6270, target=R03G\_17462, score=2, range=1029-1050, stran  
target 5' AGAUGACGAUUCCGAUAGCGAA 3'  
.....  
query 3' UCUACUUCUAAGGUUAUCGCUU 5'  
query=miR6270, target=R03G\_13914, score=2, range=897-918, strand=  
target 5' AGAUGACGAUUCCGAUAGCGAA 3'  
.....  
query 3' UCUACUUCUAAGGUUAUCGCUU 5'  
query=miR6270, target=R03G\_12058, score=2, range=897-918, strand=  
target 5' AGAUGACGAUUCCGAUAGCGAA 3'  
.....  
query 3' UCUACUUCUAAGGUUAUCGCUU 5'





::::: :::::::::::::::  
query 3' GGUUGAACACACUAUAUAAGGU 5'  
query=miR5532, target=R03G\_01852, score=3.5, range=392-412, stran  
target 5' CUAU-UUGUGUGAUUAUUCUU 3'  
::::: :::::::::::::::  
query 3' GGUUGAACACACUAUAUAAGGU 5'  
query=miR5532, target=R03G\_04039, score=4, range=374-395, strand=  
target 5' UUGAUUUGUGUGAUUAUUCUU 3'  
..... :::::::::::::::  
query 3' GGUUGAACACACUAUAUAAGGU 5'  
query=miR5532, target=R03G\_02087, score=4, range=360-380, strand=  
target 5' CCAAGUU-UGUGAUUAUUCUU 3'  
::::: :: :::::::::::::::  
query 3' GGUUGAACACACUAUAUAAGGU 5'  
query=miR5144-5p, target=R03G\_09194, score=0, range=353-371, stra  
target 5' UCACUGCACAGCACAAGAA 3'  
:::::::::::::::::::  
query 3' AGUGACGUGUCGUGUUCUU 5'  
query=miR5144-5p, target=R03G\_16798, score=0, range=353-371, stra  
target 5' UCACUGCACAGCACAAGAA 3'  
:::::::::::::::::::  
query 3' AGUGACGUGUCGUGUUCUU 5'  
query=miR5144-5p, target=R03G\_07038, score=0, range=353-371, stra  
target 5' UCACUGCACAGCACAAGAA 3'  
:::::::::::::::::::  
query 3' AGUGACGUGUCGUGUUCUU 5'  
query=miR5144-5p, target=R03G\_04803, score=0, range=353-371, stra  
target 5' UCACUGCACAGCACAAGAA 3'  
:::::::::::::::::::  
query 3' AGUGACGUGUCGUGUUCUU 5'  
query=miR5144-5p, target=R03G\_16796, score=0, range=353-371, stra  
target 5' UCACUGCACAGCACAAGAA 3'  
:::::::::::::::::::  
query 3' AGUGACGUGUCGUGUUCUU 5'  
query=miR5144-5p, target=R03G\_10516, score=0, range=353-371, stra  
target 5' UCACUGCACAGCACAAGAA 3'  
:::::::::::::::::::  
query 3' AGUGACGUGUCGUGUUCUU 5'  
query=miR5144-5p, target=R03G\_07040, score=0, range=353-371, stra  
target 5' UCACUGCACAGCACAAGAA 3'  
:::::::::::::::::::  
query 3' AGUGACGUGUCGUGUUCUU 5'  
query=miR5144-5p, target=R03G\_07124, score=0, range=353-371, stra  
target 5' UCACUGCACAGCACAAGAA 3'  
:::::::::::::::::::



query 3' AGUGACGUGUCGUGUUCUU 5'  
query=miR5144-5p, target=R03G\_15664, score=0, range=353-371, strand  
target 5' UCACUGCACAGCACAAGAA 3'  
.....  
query 3' AGUGACGUGUCGUGUUCUU 5'  
query=miR5144-5p, target=R03G\_10729, score=0, range=353-371, strand  
target 5' UCACUGCACAGCACAAGAA 3'  
.....  
query 3' AGUGACGUGUCGUGUUCUU 5'  
query=miR5144-5p, target=R03G\_10743, score=0, range=353-371, strand  
target 5' UCACUGCACAGCACAAGAA 3'  
.....  
query 3' AGUGACGUGUCGUGUUCUU 5'  
query=miR5144-5p, target=R03G\_09945, score=0, range=77-95, strand  
target 5' UCACUGCACAGCACAAGAA 3'  
.....  
query 3' AGUGACGUGUCGUGUUCUU 5'  
query=miR5144-5p, target=R03G\_01942, score=0, range=353-371, strand  
target 5' UCACUGCACAGCACAAGAA 3'  
.....  
query 3' AGUGACGUGUCGUGUUCUU 5'  
query=miR5144-5p, target=R03G\_11264, score=0, range=353-371, strand  
target 5' UCACUGCACAGCACAAGAA 3'  
.....  
query 3' AGUGACGUGUCGUGUUCUU 5'  
query=miR5144-5p, target=R03G\_02956, score=0, range=353-371, strand  
target 5' UCACUGCACAGCACAAGAA 3'  
.....  
query 3' AGUGACGUGUCGUGUUCUU 5'  
query=miR5144-5p, target=R03G\_05435, score=0, range=353-371, strand  
target 5' UCACUGCACAGCACAAGAA 3'  
.....  
query 3' AGUGACGUGUCGUGUUCUU 5'  
query=miR5144-5p, target=R03G\_07030, score=0, range=353-371, strand  
target 5' UCACUGCACAGCACAAGAA 3'  
.....  
query 3' AGUGACGUGUCGUGUUCUU 5'  
query=miR5144-5p, target=R03G\_00256, score=0, range=353-371, strand  
target 5' UCACUGCACAGCACAAGAA 3'  
.....  
query 3' AGUGACGUGUCGUGUUCUU 5'  
query=miR5144-5p, target=R03G\_10780, score=0, range=353-371, strand  
target 5' UCACUGCACAGCACAAGAA 3'  
.....  
query 3' AGUGACGUGUCGUGUUCUU 5'

query=miR5144-5p, target=R03G\_12070, score=0, range=353-371, str  
target 5' UCACUGCACAGCACAAGAA 3'  
:::::::::::::::::::  
query 3' AGUGACGUGUCGUGUUCUU 5'  
query=miR5144-5p, target=R03G\_09542, score=0, range=353-371, str  
target 5' UCACUGCACAGCACAAGAA 3'  
:::::::::::::::::::  
query 3' AGUGACGUGUCGUGUUCUU 5'  
query=miR5144-5p, target=R03G\_17449, score=0, range=353-371, str  
target 5' UCACUGCACAGCACAAGAA 3'  
:::::::::::::::::::  
query 3' AGUGACGUGUCGUGUUCUU 5'  
query=miR5144-5p, target=R03G\_05939, score=0, range=353-371, str  
target 5' UCACUGCACAGCACAAGAA 3'  
:::::::::::::::::::  
query 3' AGUGACGUGUCGUGUUCUU 5'  
query=miR5144-5p, target=R03G\_14361, score=0, range=353-371, str  
target 5' UCACUGCACAGCACAAGAA 3'  
:::::::::::::::::::  
query 3' AGUGACGUGUCGUGUUCUU 5'  
query=miR5144-5p, target=R03G\_09967, score=0, range=353-371, str  
target 5' UCACUGCACAGCACAAGAA 3'  
:::::::::::::::::::  
query 3' AGUGACGUGUCGUGUUCUU 5'  
query=miR5144-5p, target=R03G\_05267, score=0, range=353-371, str  
target 5' UCACUGCACAGCACAAGAA 3'  
:::::::::::::::::::  
query 3' AGUGACGUGUCGUGUUCUU 5'  
query=miR5144-5p, target=R03G\_05264, score=0, range=353-371, str  
target 5' UCACUGCACAGCACAAGAA 3'  
:::::::::::::::::::  
query 3' AGUGACGUGUCGUGUUCUU 5'  
query=miR5144-5p, target=R03G\_04210, score=0, range=353-371, str  
target 5' UCACUGCACAGCACAAGAA 3'  
:::::::::::::::::::  
query 3' AGUGACGUGUCGUGUUCUU 5'  
query=miR5144-5p, target=R03G\_16142, score=0, range=356-374, str  
target 5' UCACUGCACAGCACAAGAA 3'  
:::::::::::::::::::  
query 3' AGUGACGUGUCGUGUUCUU 5'  
query=miR5144-5p, target=R03G\_08660, score=0, range=353-371, str  
target 5' UCACUGCACAGCACAAGAA 3'  
:::::::::::::::::::  
query 3' AGUGACGUGUCGUGUUCUU 5'  
query=miR5144-5p, target=R03G\_05921, score=0, range=353-371, str



strand=1  
target 5' UCGCUGCACAGCACAAAAA 3'  
:::~::~  
query 3' AGUGACGUGUCGUGUUCUU 5'  
query=miR5144-5p, target=R03G\_05628, score=2.5, range=353-371,  
strand=1  
target 5' UCGCUGCACAGCACAAAAA 3'  
:::~::~  
query 3' AGUGACGUGUCGUGUUCUU 5'  
query=miR5144-5p, target=R03G\_07103, score=2.5, range=77-95, stra  
target 5' UCGCUGCACAGCACAAAAA 3'  
:::~::~  
query 3' AGUGACGUGUCGUGUUCUU 5'  
query=miR5144-5p, target=R03G\_14568, score=2.5, range=353-371,  
strand=1  
target 5' UCGCUGCACAGCACAAAAA 3'  
:::~::~  
query 3' AGUGACGUGUCGUGUUCUU 5'  
query=miR5144-5p, target=R03G\_16689, score=2.5, range=353-371,  
strand=1  
target 5' UCGCUGCACAGCACAAAAA 3'  
:::~::~  
query 3' AGUGACGUGUCGUGUUCUU 5'  
query=miR5144-5p, target=R03G\_17308, score=2.5, range=353-371,  
strand=1  
target 5' UCGCUGCACAGCACAAAAA 3'  
:::~::~  
query 3' AGUGACGUGUCGUGUUCUU 5'  
query=miR5144-5p, target=R03G\_10798, score=2.5, range=353-371,  
strand=1  
target 5' UCGCUGCACAGCACAAAAA 3'  
:::~::~  
query 3' AGUGACGUGUCGUGUUCUU 5'  
query=miR5144-5p, target=R03G\_03037, score=2.5, range=1836-1853,  
strand=-1  
target 5' UC-CUUCACAGCACAAGAG 3'  
:::~::~  
query 3' AGUGACGUGUCGUGUUCUU 5'  
query=miR5144-5p, target=R03G\_17083, score=3, range=1703-1721,  
strand=1  
target 5' UUGCUGAACAGCACAAGAA 3'  
:::~::~  
query 3' AGUGACGUGUCGUGUUCUU 5'  
query=miR5144-5p, target=R03G\_07214, score=3, range=62-81, strand  
target 5' UCACUUGCACAGCACGAGAU 3'

```
:::: :::::::::::::::
query 3' AGUG-ACGUGUCGUGUUCUU 5'
query=miR5144-5p, target=R03G_08312, score=3, range=216-234, stra
target 5' UCAGUGGACAGCACAAGAA 3'
::: :: :::::::::::::::
query 3' AGUGACGUGUCGUGUUCUU 5'
query=miR5144-5p, target=R03G_06678, score=3, range=843-860, stra
target 5' UC-CUGCUCAGCACAAGAA 3'
:: :::: :::::::::::::::
query 3' AGUGACGUGUCGUGUUCUU 5'
query=miR5144-5p, target=R03G_05120, score=4, range=289-306, stra
target 5' UCACUGCACAGCGC-GGAA 3'
::::::::::::: ::::
query 3' AGUGACGUGUCGUGUUCUU 5'
query=miR5144-5p, target=R03G_14679, score=4, range=702-720, stra
target 5' UUAUUUAUACAGCACAAGAU 3'
::::: :::::::::::::::
query 3' AGUGACGUGUCGUGUUCUU 5'
query=miR5144-5p, target=R03G_04155, score=4, range=161-180, stra
target 5' UGGCUGUACAGCACGAAGAA 3'
: ::::::::::::::: :::::
query 3' AGUGACGUGUCGUG-UUCUU 5'
query=miR5144-5p, target=R03G_00637, score=4, range=3-20, strand=
target 5' GUGC-GCACAGCACAAGGA 3'
... :::::::::::::::
query 3' AGUGACGUGUCGUGUUCUU 5'
query=miR5144-5p, target=R03G_08491, score=4, range=760-777, stra
target 5' ACAC-CCACAGUACAAGAA 3'
::: :::::::::::::::
query 3' AGUGACGUGUCGUGUUCUU 5'
query=miR5144-5p, target=R03G_06174, score=4, range=2914-2931,
strand=1
target 5' UCACUGCACA-CACAAGGC 3'
::::::::::::: :::::
query 3' AGUGACGUGUCGUGUUCUU 5'
query=miR5144-5p, target=R03G_07934, score=4, range=325-342, stra
target 5' UUAUUUCA-AGCACAAGAA 3'
::::: :: :::::::::::::::
query 3' AGUGACGUGUCGUGUUCUU 5'
query=miR5144-5p, target=R03G_17255, score=4, range=1093-1110,
strand=-1
target 5' CCACUG-ACAGCACAAGGA 3'
::::: :::::::::::::::
query 3' AGUGACGUGUCGUGUUCUU 5'
query=miR5144-5p, target=R03G_11979, score=4, range=1096-1113,
```

strand=-1  
target 5' CCACUG-ACAGCACAAGGA 3'  
::::: :::::::::::::::  
query 3' AGUGACGUGUCGUGUUCUU 5'  
query=miR5144-5p, target=R03G\_10532, score=4, range=1108-1125,  
strand=-1  
target 5' CCACUG-ACAGCACAAGGA 3'  
::::: :::::::::::::::  
query 3' AGUGACGUGUCGUGUUCUU 5'  
query=miR6462e, target=R03G\_06442, score=0, range=4812-4831, stra  
target 5' AGUAGACAAAAAGGCAAAAA 3'  
::::: :::::::::::::::  
query 3' UCAUCUGUUUUUCCGUUUUU 5'  
query=miR6462e, target=R03G\_02691, score=0, range=7644-7663, stra  
target 5' AGUAGACAAAAAGGCAAAAA 3'  
::::: :::::::::::::::  
query 3' UCAUCUGUUUUUCCGUUUUU 5'  
query=miR6462e, target=R03G\_09965, score=0, range=4155-4174, stra  
target 5' AGUAGACAAAAAGGCAAAAA 3'  
::::: :::::::::::::::  
query 3' UCAUCUGUUUUUCCGUUUUU 5'  
query=miR6462e, target=R03G\_13920, score=0, range=4155-4174, stra  
target 5' AGUAGACAAAAAGGCAAAAA 3'  
::::: :::::::::::::::  
query 3' UCAUCUGUUUUUCCGUUUUU 5'  
query=miR6462e, target=R03G\_03547, score=0, range=4155-4174, stra  
target 5' AGUAGACAAAAAGGCAAAAA 3'  
::::: :::::::::::::::  
query 3' UCAUCUGUUUUUCCGUUUUU 5'  
query=miR6462e, target=R03G\_13867, score=0, range=4071-4090, stra  
target 5' AGUAGACAAAAAGGCAAAAA 3'  
::::: :::::::::::::::  
query 3' UCAUCUGUUUUUCCGUUUUU 5'  
query=miR6462e, target=R03G\_02959, score=0, range=4155-4174, stra  
target 5' AGUAGACAAAAAGGCAAAAA 3'  
::::: :::::::::::::::  
query 3' UCAUCUGUUUUUCCGUUUUU 5'  
query=miR6462e, target=R03G\_15250, score=0, range=4110-4129, stra  
target 5' AGUAGACAAAAAGGCAAAAA 3'  
::::: :::::::::::::::  
query 3' UCAUCUGUUUUUCCGUUUUU 5'  
query=miR6462e, target=R03G\_17371, score=0, range=4110-4129, stra  
target 5' AGUAGACAAAAAGGCAAAAA 3'  
::::: :::::::::::::::  
query 3' UCAUCUGUUUUUCCGUUUUU 5'

query=miR6462e, target=R03G\_06427, score=0, range=3747-3766, stra  
target 5' AGUAGACAAAAAGGCAAAAA 3'  
::::::::::::::::::::  
query 3' UCAUCUGUUUUUCCGUUUUU 5'  
query=miR6462e, target=R03G\_02222, score=0, range=1209-1228, stra  
target 5' AGUAGACAAAAAGGCAAAAA 3'  
::::::::::::::::::::  
query 3' UCAUCUGUUUUUCCGUUUUU 5'  
query=miR6462e, target=R03G\_10558, score=0, range=1908-1927, stra  
target 5' AGUAGACAAAAAGGCAAAAA 3'  
::::::::::::::::::::  
query 3' UCAUCUGUUUUUCCGUUUUU 5'  
query=miR6462e, target=R03G\_04115, score=0, range=1098-1117, stra  
target 5' AGUAGACAAAAAGGCAAAAA 3'  
::::::::::::::::::::  
query 3' UCAUCUGUUUUUCCGUUUUU 5'  
query=miR6462e, target=R03G\_11776, score=0, range=1245-1264, stra  
target 5' AGUAGACAAAAAGGCAAAAA 3'  
::::::::::::::::::::  
query 3' UCAUCUGUUUUUCCGUUUUU 5'  
query=miR6462e, target=R03G\_14355, score=0, range=2361-2380, stra  
target 5' AGUAGACAAAAAGGCAAAAA 3'  
::::::::::::::::::::  
query 3' UCAUCUGUUUUUCCGUUUUU 5'  
query=miR6462e, target=R03G\_17404, score=0, range=783-802, strand  
target 5' AGUAGACAAAAAGGCAAAAA 3'  
::::::::::::::::::::  
query 3' UCAUCUGUUUUUCCGUUUUU 5'  
query=miR6462e, target=R03G\_13749, score=0, range=2664-2683, stra  
target 5' AGUAGACAAAAAGGCAAAAA 3'  
::::::::::::::::::::  
query 3' UCAUCUGUUUUUCCGUUUUU 5'  
query=miR6462e, target=R03G\_01330, score=0, range=1389-1408, stra  
target 5' AGUAGACAAAAAGGCAAAAA 3'  
::::::::::::::::::::  
query 3' UCAUCUGUUUUUCCGUUUUU 5'  
query=miR6462e, target=R03G\_06428, score=0, range=3249-3268, stra  
target 5' AGUAGACAAAAAGGCAAAAA 3'  
::::::::::::::::::::  
query 3' UCAUCUGUUUUUCCGUUUUU 5'  
query=miR6462e, target=R03G\_01613, score=0, range=2352-2371, stra  
target 5' AGUAGACAAAAAGGCAAAAA 3'  
::::::::::::::::::::  
query 3' UCAUCUGUUUUUCCGUUUUU 5'  
query=miR6462e, target=R03G\_05619, score=0, range=2298-2317, stra





query=miR6462e, target=R03G\_02732, score=3.5, range=295-313, strand  
target 5' AGUA-UUAAAAAGGCAAAGA 3'  
:::: .:::::::::::  
query 3' UCAUCUGUUUUUCCGUUUUU 5'  
query=miR6462e, target=R03G\_03214, score=3.5, range=229-247, strand  
target 5' AGUCUG-AAAAAGGCAAAA 3'  
::: .:::::::::::  
query 3' UCAUCUGUUUUUCCGUUUUU 5'  
query=miR6462e, target=R03G\_12330, score=4, range=573-592, strand  
target 5' AGCAGACAAGAAGGCGAGAA 3'  
:: :::::::::::::  
query 3' UCAUCUGUUUUUCCGUUUUU 5'  
query=miR6462e, target=R03G\_12274, score=4, range=375-394, strand  
target 5' AGUAGAUAAAAAGGCAGUAG 3'  
::::::::::.::  
query 3' UCAUCUGUUUUUCCGUUUUU 5'  
query=miR6462e, target=R03G\_06590, score=4, range=3001-3020, strand  
target 5' AGUGCACAAAAGGUGAAAAG 3'  
:::: :::::::::::::  
query 3' UCAUCUGUUUUUCCGUUUUU 5'  
query=miR6462e, target=R03G\_01430, score=4, range=6-25, strand=1  
target 5' AGUAGAAAAGAAGGCAAAGU 3'  
::::: :::::::::::::  
query 3' UCAUCUGUUUUUCCGUUUUU 5'  
query=miR6462e, target=R03G\_15381, score=4, range=823-842, strand  
target 5' ACUAGACAAGAAGGCAAAGU 3'  
: :::::::::::::  
query 3' UCAUCUGUUUUUCCGUUUUU 5'  
query=miR6462e, target=R03G\_01423, score=4, range=6-25, strand=1  
target 5' AGUAGAAAAGAAGGCAAAGU 3'  
::::: :::::::::::::  
query 3' UCAUCUGUUUUUCCGUUUUU 5'  
query=miR6462e, target=R03G\_09727, score=4, range=446-465, strand  
target 5' UGUUGCAAAGAGGCAAAAAG 3'  
:: :::::::::::::  
query 3' UCAUCUGUUUUUCCGUUUUU 5'  
query=miR6462e, target=R03G\_13128, score=4, range=474-492, strand  
target 5' AGUAGAUGAAAA-GCAAAAAG 3'  
::::::::::: :::::::  
query 3' UCAUCUGUUUUUCCGUUUUU 5'  
query=miR6462e, target=R03G\_11598, score=4, range=654-673, strand  
target 5' AGAAGACGAAAAGGAAAAAA 3'  
:: ::::::::::::: :::::::  
query 3' UCAUCUGUUUUUCCGUUUUU 5'  
query=miR6462e, target=R03G\_04477, score=4, range=2952-2971, strand





strand=-1  
target 5' ACCUGUAUGACAGGAAGCACCA 3'  
::::::::::::::::::::::::::  
query 3' UGGACAUGCUGUCCUUCGUGGU 5'  
query=miR9657a-3p, target=R03G\_11486, score=0.5, range=489-510,  
strand=-1  
target 5' ACCUGUAUGACAGGAAGCACCA 3'  
::::::::::::::::::::::::::  
query 3' UGGACAUGCUGUCCUUCGUGGU 5'  
query=miR9657a-3p, target=R03G\_05133, score=0.5, range=543-564,  
strand=-1  
target 5' ACCUGUAUGACAGGAAGCACCA 3'  
::::::::::::::::::::::::::  
query 3' UGGACAUGCUGUCCUUCGUGGU 5'  
query=miR9657a-3p, target=R03G\_01528, score=0.5, range=348-369,  
strand=-1  
target 5' ACCUGUAUGACAGGAAGCACCA 3'  
::::::::::::::::::::::::::  
query 3' UGGACAUGCUGUCCUUCGUGGU 5'  
query=miR9657a-3p, target=R03G\_08649, score=0.5, range=485-506,  
strand=-1  
target 5' ACCUGUAUGACAGGAAGCACCA 3'  
::::::::::::::::::::::::::  
query 3' UGGACAUGCUGUCCUUCGUGGU 5'  
query=miR9657a-3p, target=R03G\_15496, score=0.5, range=423-444,  
strand=-1  
target 5' ACCUGUAUGACAGGAAGCACCA 3'  
::::::::::::::::::::::::::  
query 3' UGGACAUGCUGUCCUUCGUGGU 5'  
query=miR9657a-3p, target=R03G\_10644, score=0.5, range=165-186,  
strand=-1  
target 5' ACCUGUAUGACAGGAAGCACCA 3'  
::::::::::::::::::::::::::  
query 3' UGGACAUGCUGUCCUUCGUGGU 5'  
query=miR9657a-3p, target=R03G\_05535, score=0.5, range=165-186,  
strand=-1  
target 5' ACCUGUAUGACAGGAAGCACCA 3'  
::::::::::::::::::::::::::  
query 3' UGGACAUGCUGUCCUUCGUGGU 5'  
query=miR9657a-3p, target=R03G\_12139, score=0.5, range=153-174,  
strand=-1  
target 5' ACCUGUAUGACAGGAAGCACCA 3'  
::::::::::::::::::::::::::  
query 3' UGGACAUGCUGUCCUUCGUGGU 5'  
query=miR9657a-3p, target=R03G\_01518, score=0.5, range=153-174,

strand=-1  
target 5' ACCUGUAUGACAGGAAGCACCA 3'  
::::::::::::::::::::::::::  
query 3' UGGACAUGCUGUCCUUCGUGGU 5'  
query=miR9657a-3p, target=R03G\_01013, score=0.5, range=222-243,  
strand=-1  
target 5' ACCUGUAUGACAGGAAGCACCA 3'  
::::::::::::::::::::::::::  
query 3' UGGACAUGCUGUCCUUCGUGGU 5'  
query=miR9657a-3p, target=R03G\_16893, score=0.5, range=165-186,  
strand=-1  
target 5' ACCUGUAUGACAGGAAGCACCA 3'  
::::::::::::::::::::::::::  
query 3' UGGACAUGCUGUCCUUCGUGGU 5'  
query=miR9657a-3p, target=R03G\_04866, score=0.5, range=165-186,  
strand=-1  
target 5' ACCUGUAUGACAGGAAGCACCA 3'  
::::::::::::::::::::::::::  
query 3' UGGACAUGCUGUCCUUCGUGGU 5'  
query=miR9657a-3p, target=R03G\_11567, score=1.5, range=1437-1458,  
strand=-1  
target 5' ACCUGUAUGAUAGGAAGCACCA 3'  
::::::::::::::::::::::::::  
query 3' UGGACAUGCUGUCCUUCGUGGU 5'  
query=miR9657a-3p, target=R03G\_09419, score=1.5, range=600-621,  
strand=-1  
target 5' ACCUGUAUGACAGGAGGCACCA 3'  
::::::::::::::::::::::::::  
query 3' UGGACAUGCUGUCCUUCGUGGU 5'  
query=miR9657a-3p, target=R03G\_08301, score=1.5, range=675-696,  
strand=-1  
target 5' ACCUGUAUGAUAGGAAGCACCA 3'  
::::::::::::::::::::::::::  
query 3' UGGACAUGCUGUCCUUCGUGGU 5'  
query=miR9657a-3p, target=R03G\_06976, score=1.5, range=246-267,  
strand=-1  
target 5' ACCUGUAUGACAGGAAGCACUA 3'  
::::::::::::::::::::::::::  
query 3' UGGACAUGCUGUCCUUCGUGGU 5'  
query=miR9657a-3p, target=R03G\_15460, score=1.5, range=90-111,  
strand=-1  
target 5' ACCUGUAUGAUAGGAAGCACCA 3'  
::::::::::::::::::::::::::  
query 3' UGGACAUGCUGUCCUUCGUGGU 5'  
query=miR9657a-3p, target=R03G\_07788, score=1.5, range=729-750,

strand=-1  
target 5' ACCAGUAUGACAGGAAGCACCA 3'  
::: ::::::::::::::::::::  
query 3' UGGACAUGCUGUCCUUCGUGGU 5'  
query=miR9657a-3p, target=R03G\_05603, score=1.5, range=39-60,  
strand=-1  
target 5' ACCUGUAUGACAGGAAGCACCC 3'  
:::::::::::::::::::  
query 3' UGGACAUGCUGUCCUUCGUGGU 5'  
query=miR9657a-3p, target=R03G\_13903, score=1.5, range=780-801,  
strand=-1  
target 5' ACCAGUAUGACAGGAAGCACCA 3'  
::: ::::::::::::::::::::  
query 3' UGGACAUGCUGUCCUUCGUGGU 5'  
query=miR9657a-3p, target=R03G\_13672, score=1.5, range=780-801,  
strand=-1  
target 5' ACCAGUAUGACAGGAAGCACCA 3'  
::: ::::::::::::::::::::  
query 3' UGGACAUGCUGUCCUUCGUGGU 5'  
query=miR9657a-3p, target=R03G\_13664, score=1.5, range=780-801,  
strand=-1  
target 5' ACCAGUAUGACAGGAAGCACCA 3'  
::: ::::::::::::::::::::  
query 3' UGGACAUGCUGUCCUUCGUGGU 5'  
query=miR9657a-3p, target=R03G\_14722, score=1.5, range=780-801,  
strand=-1  
target 5' ACCAGUAUGACAGGAAGCACCA 3'  
::: ::::::::::::::::::::  
query 3' UGGACAUGCUGUCCUUCGUGGU 5'  
query=miR9657a-3p, target=R03G\_05303, score=1.5, range=780-801,  
strand=-1  
target 5' ACCAGUAUGACAGGAAGCACCA 3'  
::: ::::::::::::::::::::  
query 3' UGGACAUGCUGUCCUUCGUGGU 5'  
query=miR9657a-3p, target=R03G\_02354, score=1.5, range=780-801,  
strand=-1  
target 5' ACCAGUAUGACAGGAAGCACCA 3'  
::: ::::::::::::::::::::  
query 3' UGGACAUGCUGUCCUUCGUGGU 5'  
query=miR9657a-3p, target=R03G\_08906, score=1.5, range=780-801,  
strand=-1  
target 5' ACCAGUAUGACAGGAAGCACCA 3'  
::: ::::::::::::::::::::  
query 3' UGGACAUGCUGUCCUUCGUGGU 5'  
query=miR9657a-3p, target=R03G\_05194, score=1.5, range=780-801,

strand=-1  
target 5' ACCAGUAUGACAGGAAGCACCA 3'  
::: :::::::::::::::::::::  
query 3' UGGACAUGCUGUCCUUCGUGGU 5'  
query=miR9657a-3p, target=R03G\_05181, score=1.5, range=780-801,  
strand=-1  
target 5' ACCAGUAUGACAGGAAGCACCA 3'  
::: :::::::::::::::::::::  
query 3' UGGACAUGCUGUCCUUCGUGGU 5'  
query=miR9657a-3p, target=R03G\_10707, score=2, range=267-288,  
strand=-1  
target 5' AUCUGUAUGACAGGAAGCGCCA 3'  
:.....:.....:.....:  
query 3' UGGACAUGCUGUCCUUCGUGGU 5'  
query=miR9657a-3p, target=R03G\_00780, score=2, range=334-355,  
strand=-1  
target 5' ACCUGUACGACAGGAAGCUCCA 3'  
:.....:.....:.....:  
query 3' UGGACAUGCUGUCCUUCGUGGU 5'  
query=miR9657a-3p, target=R03G\_04104, score=2, range=477-498,  
strand=-1  
target 5' ACCUAUGUGACAGGAAGCACCA 3'  
:.....:.....:.....:  
query 3' UGGACAUGCUGUCCUUCGUGGU 5'  
query=miR9657a-3p, target=R03G\_04110, score=2, range=477-498,  
strand=-1  
target 5' ACCUAUGUGACAGGAAGCACCA 3'  
:.....:.....:.....:  
query 3' UGGACAUGCUGUCCUUCGUGGU 5'  
query=miR9657a-3p, target=R03G\_15836, score=2.5, range=91-112,  
strand=1  
target 5' ACCUGUAUGACAGGAAGCUCCA 3'  
:.....:.....:.....:  
query 3' UGGACAUGCUGUCCUUCGUGGU 5'  
query=miR9657a-3p, target=R03G\_01545, score=2.5, range=576-597,  
strand=-1  
target 5' ACCUGUAUGACAGGAAGCUCCA 3'  
:.....:.....:.....:  
query 3' UGGACAUGCUGUCCUUCGUGGU 5'  
query=miR9657a-3p, target=R03G\_14365, score=2.5, range=522-543,  
strand=-1  
target 5' ACCUGUAUGACAGGAAGCUCCA 3'  
:.....:.....:.....:  
query 3' UGGACAUGCUGUCCUUCGUGGU 5'  
query=miR9657a-3p, target=R03G\_14123, score=2.5, range=264-285,





strand=-1  
target 5' CUCUGUAUGACAGGAAGCUCCA 3'  
.:::::.....  
query 3' UGGACAUGCUGUCCUUCGUGGU 5'  
query=miR6202, target=R03G\_08114, score=0, range=16-35, strand=1  
target 5' CUUCAAGCUUAAAUCCUCA 3'  
:.....  
query 3' GAAGUUUCGAAUUUAGGAGU 5'  
query=miR6202, target=R03G\_00653, score=0, range=3964-3983, stran  
target 5' CUUCAAGCUUAAAUCCUCA 3'  
:.....  
query 3' GAAGUUUCGAAUUUAGGAGU 5'  
query=miR6202, target=R03G\_12753, score=0, range=16-35, strand=1  
target 5' CUUCAAGCUUAAAUCCUCA 3'  
:.....  
query 3' GAAGUUUCGAAUUUAGGAGU 5'  
query=miR6202, target=R03G\_04256, score=0, range=16-35, strand=1  
target 5' CUUCAAGCUUAAAUCCUCA 3'  
:.....  
query 3' GAAGUUUCGAAUUUAGGAGU 5'  
query=miR6202, target=R03G\_14345, score=0, range=16-35, strand=1  
target 5' CUUCAAGCUUAAAUCCUCA 3'  
:.....  
query 3' GAAGUUUCGAAUUUAGGAGU 5'  
query=miR6202, target=R03G\_08062, score=0, range=835-854, strand=  
target 5' CUUCAAGCUUAAAUCCUCA 3'  
:.....  
query 3' GAAGUUUCGAAUUUAGGAGU 5'  
query=miR6202, target=R03G\_01243, score=0, range=16-35, strand=1  
target 5' CUUCAAGCUUAAAUCCUCA 3'  
:.....  
query 3' GAAGUUUCGAAUUUAGGAGU 5'  
query=miR6202, target=R03G\_06977, score=0, range=619-638, strand=  
target 5' CUUCAAGCUUAAAUCCUCA 3'  
:.....  
query 3' GAAGUUUCGAAUUUAGGAGU 5'  
query=miR6202, target=R03G\_16319, score=0, range=4054-4073, stran  
target 5' CUUCAAGCUUAAAUCCUCA 3'  
:.....  
query 3' GAAGUUUCGAAUUUAGGAGU 5'  
query=miR6202, target=R03G\_12207, score=0, range=4054-4073, stran  
target 5' CUUCAAGCUUAAAUCCUCA 3'  
:.....  
query 3' GAAGUUUCGAAUUUAGGAGU 5'  
query=miR6202, target=R03G\_01242, score=0, range=16-35, strand=1



query 3' CCACUUUGAUGGUUCAGUAUGU 5'  
query=miR167c-3p, target=R03G\_14561, score=0, range=181-202, strand  
target 5' GGUGAAACUACCAAGUCAUACA 3'

query 3' CCACUUUGAUGGUUCAGUAUGU 5'  
query=miR167c-3p, target=R03G\_12978, score=0, range=181-202, strand  
target 5' GGUGAAACUACCAAGUCAUACA 3'

query 3' CCACUUUGAUGGUUCAGUAUGU 5'  
query=miR167c-3p, target=R03G\_15140, score=0, range=34-55, strand  
target 5' GGUGAAACUACCAAGUCAUACA 3'

query 3' CCACUUUGAUGGUUCAGUAUGU 5'  
query=miR167c-3p, target=R03G\_03606, score=0, range=181-202, strand  
target 5' GGUGAAACUACCAAGUCAUACA 3'

query 3' CCACUUUGAUGGUUCAGUAUGU 5'  
query=miR167c-3p, target=R03G\_03620, score=0, range=181-202, strand  
target 5' GGUGAAACUACCAAGUCAUACA 3'

query 3' CCACUUUGAUGGUUCAGUAUGU 5'  
query=miR167c-3p, target=R03G\_08833, score=0, range=181-202, strand  
target 5' GGUGAAACUACCAAGUCAUACA 3'

query 3' CCACUUUGAUGGUUCAGUAUGU 5'  
query=miR167c-3p, target=R03G\_14546, score=0, range=130-151, strand  
target 5' GGUGAAACUACCAAGUCAUACA 3'

query 3' CCACUUUGAUGGUUCAGUAUGU 5'  
query=miR167c-3p, target=R03G\_09203, score=0, range=130-151, strand  
target 5' GGUGAAACUACCAAGUCAUACA 3'

query 3' CCACUUUGAUGGUUCAGUAUGU 5'  
query=miR167c-3p, target=R03G\_03613, score=0, range=130-151, strand  
target 5' GGUGAAACUACCAAGUCAUACA 3'

query 3' CCACUUUGAUGGUUCAGUAUGU 5'  
query=miR167c-3p, target=R03G\_13729, score=0, range=181-202, strand  
target 5' GGUGAAACUACCAAGUCAUACA 3'

query 3' CCACUUUGAUGGUUCAGUAUGU 5'  
query=miR167c-3p, target=R03G\_15666, score=0, range=181-202, strand  
target 5' GGUGAAACUACCAAGUCAUACA 3'

query 3' CCACUUUGAUGGUUCAGUAUGU 5'  
query=miR167c-3p, target=R03G\_05949, score=0, range=181-202, strand  
target 5' GGUGAAACUACCAAGUCAUACA 3'  
.....  
query 3' CCACUUUGAUGGUUCAGUAUGU 5'  
query=miR167c-3p, target=R03G\_17238, score=0, range=181-202, strand  
target 5' GGUGAAACUACCAAGUCAUACA 3'  
.....  
query 3' CCACUUUGAUGGUUCAGUAUGU 5'  
query=miR167c-3p, target=R03G\_03586, score=0, range=130-151, strand  
target 5' GGUGAAACUACCAAGUCAUACA 3'  
.....  
query 3' CCACUUUGAUGGUUCAGUAUGU 5'  
query=miR167c-3p, target=R03G\_16718, score=0, range=34-55, strand  
target 5' GGUGAAACUACCAAGUCAUACA 3'  
.....  
query 3' CCACUUUGAUGGUUCAGUAUGU 5'  
query=miR167c-3p, target=R03G\_17360, score=0, range=34-55, strand  
target 5' GGUGAAACUACCAAGUCAUACA 3'  
.....  
query 3' CCACUUUGAUGGUUCAGUAUGU 5'  
query=miR167c-3p, target=R03G\_13713, score=0, range=34-55, strand  
target 5' GGUGAAACUACCAAGUCAUACA 3'  
.....  
query 3' CCACUUUGAUGGUUCAGUAUGU 5'  
query=miR167c-3p, target=R03G\_13740, score=0, range=34-55, strand  
target 5' GGUGAAACUACCAAGUCAUACA 3'  
.....  
query 3' CCACUUUGAUGGUUCAGUAUGU 5'  
query=miR167c-3p, target=R03G\_13851, score=0, range=34-55, strand  
target 5' GGUGAAACUACCAAGUCAUACA 3'  
.....  
query 3' CCACUUUGAUGGUUCAGUAUGU 5'  
query=miR167c-3p, target=R03G\_15148, score=0, range=34-55, strand  
target 5' GGUGAAACUACCAAGUCAUACA 3'  
.....  
query 3' CCACUUUGAUGGUUCAGUAUGU 5'  
query=miR167c-3p, target=R03G\_16690, score=0, range=34-55, strand  
target 5' GGUGAAACUACCAAGUCAUACA 3'  
.....  
query 3' CCACUUUGAUGGUUCAGUAUGU 5'  
query=miR167c-3p, target=R03G\_15144, score=0, range=34-55, strand  
target 5' GGUGAAACUACCAAGUCAUACA 3'  
.....  
query 3' CCACUUUGAUGGUUCAGUAUGU 5'

query=miR167c-3p, target=R03G\_13282, score=0, range=181-202, stra  
 target 5' GGUGAAACUACCAAGUCAUACA 3'  
 ::::::::::::::::::::::

query 3' CCACUUUGAUGGUUCAGUAUGU 5'  
 query=miR167c-3p, target=R03G\_14720, score=2, range=130-151, stra  
 target 5' GGUGAAACUACCAAUUCAUACA 3'  
 :::::::::::::: ::::::

query 3' CCACUUUGAUGGUUCAGUAUGU 5'  
 query=miR2082, target=R03G\_07738, score=0, range=93-114, strand=-  
 target 5' AAGAGAAGAAGAAGGAACAACA 3'  
 ::::::::::::::::::::::

query 3' UUCUCUUCUUCUUCUCCUUGUUGU 5'  
 query=miR2082, target=R03G\_01726, score=0, range=93-114, strand=-  
 target 5' AAGAGAAGAAGAAGGAACAACA 3'  
 ::::::::::::::::::::::

query 3' UUCUCUUCUUCUUCUCCUUGUUGU 5'  
 query=miR2082, target=R03G\_11537, score=0, range=93-114, strand=-  
 target 5' AAGAGAAGAAGAAGGAACAACA 3'  
 ::::::::::::::::::::::

query 3' UUCUCUUCUUCUUCUCCUUGUUGU 5'  
 query=miR2082, target=R03G\_11236, score=0, range=93-114, strand=-  
 target 5' AAGAGAAGAAGAAGGAACAACA 3'  
 ::::::::::::::::::::::

query 3' UUCUCUUCUUCUUCUCCUUGUUGU 5'  
 query=miR2082, target=R03G\_07981, score=0, range=93-114, strand=-  
 target 5' AAGAGAAGAAGAAGGAACAACA 3'  
 ::::::::::::::::::::::

query 3' UUCUCUUCUUCUUCUCCUUGUUGU 5'  
 query=miR2082, target=R03G\_07696, score=0, range=93-114, strand=-  
 target 5' AAGAGAAGAAGAAGGAACAACA 3'  
 ::::::::::::::::::::::

query 3' UUCUCUUCUUCUUCUCCUUGUUGU 5'  
 query=miR2082, target=R03G\_06730, score=0, range=93-114, strand=-  
 target 5' AAGAGAAGAAGAAGGAACAACA 3'  
 ::::::::::::::::::::::

query 3' UUCUCUUCUUCUUCUCCUUGUUGU 5'  
 query=miR2082, target=R03G\_07720, score=0, range=93-114, strand=-  
 target 5' AAGAGAAGAAGAAGGAACAACA 3'  
 ::::::::::::::::::::::

query 3' UUCUCUUCUUCUUCUCCUUGUUGU 5'  
 query=miR2082, target=R03G\_04211, score=0, range=93-114, strand=-  
 target 5' AAGAGAAGAAGAAGGAACAACA 3'  
 ::::::::::::::::::::::

query 3' UUCUCUUCUUCUUCUCCUUGUUGU 5'  
 query=miR2082, target=R03G\_09602, score=0, range=93-114, strand=-





query 3' UUC-UCUUCUUCUUCUUCUUGUUGU 5'  
query=miR2082, target=R03G\_09182, score=1.5, range=93-115, strand  
target 5' AAGAAGAAGGAGAAGGAACAACA 3'  
::: ::::::::::::::::::::::::::::

query 3' UUC-UCUUCUUCUUCUUCUUGUUGU 5'  
query=miR2082, target=R03G\_04679, score=1.5, range=93-115, strand  
target 5' AAGAAGAAGGAGAAGGAACAACA 3'  
::: ::::::::::::::::::::::::::::

query 3' UUC-UCUUCUUCUUCUUCUUGUUGU 5'  
query=miR2082, target=R03G\_10488, score=3, range=987-1008, strand  
target 5' AAGAGUAGAAGAAGGAACACCA 3'  
::::: ::::::::::::::::::::::::::::

query 3' UUCUCUUCUUCUUCUUCUUGUUGU 5'  
query=miR2082, target=R03G\_01565, score=3, range=216-238, strand=  
target 5' AAGAAGAAGCAGAGGGAACAACA 3'  
::: ::::::: ::::::::::::::::::::::::::::

query 3' UUC-UCUUCUUCUUCUUCUUGUUGU 5'  
query=miR2082, target=R03G\_13069, score=3.5, range=941-962, stran  
target 5' AAGAAAGGAAGAAGAAACAACA 3'  
::::: :.::::::::::: ::::::::::::::

query 3' UUCUCUUCUUCUUCUUCUUGUUGU 5'  
query=miR2082, target=R03G\_06764, score=3.5, range=60-80, strand=  
target 5' ACGGGAAGAAGAA-GAACAACA 3'  
: :.::::::::::: ::::::::::::::

query 3' UUCUCUUCUUCUUCUUCUUGUUGU 5'  
query=miR2082, target=R03G\_08916, score=3.5, range=9-30, strand=-  
target 5' AAGAGAAGGAGGAGGAGCAACU 3'  
::::::::::: ::::::::::::::

query 3' UUCUCUUCUUCUUCUUCUUGUUGU 5'  
query=miR2082, target=R03G\_02306, score=3.5, range=498-519, stran  
target 5' UGGAGCAGAAGAAGGAACAGCA 3'  
.::::: ::::::::::::::::::::::::::::

query 3' UUCUCUUCUUCUUCUUCUUGUUGU 5'  
query=miR2082, target=R03G\_06282, score=3.5, range=216-238, stran  
target 5' AAGAGGAAGCAGAGGGAACAACG 3'  
::::: ::::::: ::::::::::::::::::::::::::::

query 3' UUCU-CUUCUUCUUCUUCUUGUUGU 5'  
query=miR2082, target=R03G\_10686, score=3.5, range=216-238, stran  
target 5' AAGAGGAAGCAGAGGGAACAACG 3'  
::::: ::::::: ::::::::::::::::::::::::::::

query 3' UUCU-CUUCUUCUUCUUCUUGUUGU 5'  
query=miR2082, target=R03G\_14846, score=3.5, range=216-238, stran  
target 5' AAGAGGAAGCAGAGGGAACAACG 3'  
::::: ::::::: ::::::::::::::::::::::::::::

query 3' UUCU-CUUCUUCUUCUUCUUGUUGU 5'





target 5' GGGAGCAGAAGCAGGAACAACA 3'  
.....  
query 3' UUCUCUUCUUCUCCUUGUUGU 5'  
query=miR2082, target=R03G\_17433, score=4, range=93-114, strand=-  
target 5' GGGAGCAGAAGCAGGAACAACA 3'  
.....  
query 3' UUCUCUUCUUCUCCUUGUUGU 5'  
query=miR2082, target=R03G\_16743, score=4, range=120-141, strand=  
target 5' AGGAGCAGGAGCAGGAACAACA 3'  
.....  
query 3' UUCUCUUCUUCUCCUUGUUGU 5'  
query=miR2082, target=R03G\_04659, score=4, range=54-75, strand=-1  
target 5' GGGAGCAGAAGCAGGAACAACA 3'  
.....  
query 3' UUCUCUUCUUCUCCUUGUUGU 5'  
query=miR2082, target=R03G\_07692, score=4, range=27-48, strand=-1  
target 5' GGGAGCAGAAGCAGGAACAACA 3'  
.....  
query 3' UUCUCUUCUUCUCCUUGUUGU 5'  
query=miR2082, target=R03G\_15879, score=4, range=93-114, strand=-  
target 5' GGGAGCAGAAGCAGGAACAACA 3'  
.....  
query 3' UUCUCUUCUUCUCCUUGUUGU 5'  
query=miR2082, target=R03G\_13452, score=4, range=93-114, strand=-  
target 5' GGGAGCAGAAGCAGGAACAACA 3'  
.....  
query 3' UUCUCUUCUUCUCCUUGUUGU 5'  
query=miR2082, target=R03G\_16369, score=4, range=93-114, strand=-  
target 5' GGGAGCAGAAGCAGGAACAACA 3'  
.....  
query 3' UUCUCUUCUUCUCCUUGUUGU 5'  
query=miR2082, target=R03G\_14553, score=4, range=93-114, strand=-  
target 5' GGGAGCAGAAGCAGGAACAACA 3'  
.....  
query 3' UUCUCUUCUUCUCCUUGUUGU 5'  
query=miR2082, target=R03G\_11543, score=4, range=93-114, strand=-  
target 5' GGGAGCAGAAGCAGGAACAACA 3'  
.....  
query 3' UUCUCUUCUUCUCCUUGUUGU 5'  
query=miR2082, target=R03G\_15887, score=4, range=93-114, strand=-  
target 5' GGGAGCAGAAGCAGGAACAACA 3'  
.....  
query 3' UUCUCUUCUUCUCCUUGUUGU 5'  
query=miR2082, target=R03G\_05347, score=4, range=93-114, strand=-  
target 5' GGGAGCAGAAGCAGGAACAACA 3'



query 3' UCAUGUACUAACUGCUGCACAGU 5'  
query=miR7803b-3p, target=R03G\_04674, score=1, range=162-184, str  
target 5' AGUACAUGAUUGGCGACGUGUCA 3'  
.....  
query 3' UCAUGUACUAACUGCUGCACAGU 5'  
query=miR7803b-3p, target=R03G\_17223, score=1, range=135-157, str  
target 5' AGUACAUGAUUGGCGACGUGUCA 3'  
.....  
query 3' UCAUGUACUAACUGCUGCACAGU 5'  
query=miR7803b-3p, target=R03G\_07702, score=1, range=162-184, str  
target 5' AGUACAUGAUUGGCGACGUGUCA 3'  
.....  
query 3' UCAUGUACUAACUGCUGCACAGU 5'  
query=miR7803b-3p, target=R03G\_16420, score=1, range=162-184, str  
target 5' AGUACAUGAUUGGCGACGUGUCA 3'  
.....  
query 3' UCAUGUACUAACUGCUGCACAGU 5'  
query=miR7803b-3p, target=R03G\_15282, score=1, range=135-157, str  
target 5' AGUACAUGAUUGGCGACGUGUCA 3'  
.....  
query 3' UCAUGUACUAACUGCUGCACAGU 5'  
query=miR7803b-3p, target=R03G\_10795, score=1, range=411-433, str  
target 5' AGUACAUGAUUGGCGACGUGUCA 3'  
.....  
query 3' UCAUGUACUAACUGCUGCACAGU 5'  
query=miR7803b-3p, target=R03G\_15261, score=1, range=411-433, str  
target 5' AGUACAUGAUUGGCGACGUGUCA 3'  
.....  
query 3' UCAUGUACUAACUGCUGCACAGU 5'  
query=miR7803b-3p, target=R03G\_17017, score=1, range=411-433, str  
target 5' AGUACAUGAUUGGCGACGUGUCA 3'  
.....  
query 3' UCAUGUACUAACUGCUGCACAGU 5'  
query=miR7803b-3p, target=R03G\_04695, score=1, range=201-223, str  
target 5' AGUACAUGAUUGGCGACGUGUCA 3'  
.....  
query 3' UCAUGUACUAACUGCUGCACAGU 5'  
query=miR7803b-3p, target=R03G\_07867, score=1, range=162-184, str  
target 5' AGUACAUGAUUGGCGACGUGUCA 3'  
.....  
query 3' UCAUGUACUAACUGCUGCACAGU 5'  
query=miR7803b-3p, target=R03G\_16725, score=1, range=153-175, str  
target 5' AGUACAUGAUUGGCGACGUGUCA 3'  
.....  
query 3' UCAUGUACUAACUGCUGCACAGU 5'

query=miR7803b-3p, target=R03G\_13852, score=1, range=162-184, str  
target 5' AGUACAUGAUUGGCGACGUGUCA 3'  
:~::~:  
query 3' UCAUGUACUAACUGCUGCACAGU 5'  
query=miR7803b-3p, target=R03G\_16383, score=1, range=411-433, str  
target 5' AGUACAUGAUUGGCGACGUGUCA 3'  
:~::~:  
query 3' UCAUGUACUAACUGCUGCACAGU 5'  
query=miR7803b-3p, target=R03G\_06735, score=1, range=135-157, str  
target 5' AGUACAUGAUUGGCGACGUGUCA 3'  
:~::~:  
query 3' UCAUGUACUAACUGCUGCACAGU 5'  
query=miR7803b-3p, target=R03G\_11962, score=1, range=135-157, str  
target 5' AGUACAUGAUUGGCGACGUGUCA 3'  
:~::~:  
query 3' UCAUGUACUAACUGCUGCACAGU 5'  
query=miR7803b-3p, target=R03G\_06433, score=1, range=135-157, str  
target 5' AGUACAUGAUUGGCGACGUGUCA 3'  
:~::~:  
query 3' UCAUGUACUAACUGCUGCACAGU 5'  
query=miR7803b-3p, target=R03G\_05521, score=1, range=290-312, str  
target 5' CGUACAUGAUUGACGACGUGUCA 3'  
:~::~:  
query 3' UCAUGUACUAACUGCUGCACAGU 5'  
query=miR7803b-3p, target=R03G\_01205, score=1.5, range=411-433,  
strand=1  
target 5' AGUACAUGAUUGGCGACGUGUCG 3'  
:~::~:  
query 3' UCAUGUACUAACUGCUGCACAGU 5'  
query=miR7803b-3p, target=R03G\_00238, score=1.5, range=411-433,  
strand=1  
target 5' AGUACAUGAUUGGCGACGUGUCG 3'  
:~::~:  
query 3' UCAUGUACUAACUGCUGCACAGU 5'  
query=miR7803b-3p, target=R03G\_16698, score=1.5, range=408-430,  
strand=1  
target 5' AGUACAUGAUUGGCGACGUGUCG 3'  
:~::~:  
query 3' UCAUGUACUAACUGCUGCACAGU 5'  
query=miR7803b-3p, target=R03G\_12537, score=1.5, range=162-184,  
strand=1  
target 5' AGUACAUGAUUGGCGACGUGUCG 3'  
:~::~:  
query 3' UCAUGUACUAACUGCUGCACAGU 5'  
query=miR7803b-3p, target=R03G\_17416, score=2, range=411-433, str

target 5' AGUACAUGAUUGGCGACGUGUUA 3'  
:~::~  
query 3' UCAUGUACUAACUGCUGCACAGU 5'  
query=miR7803b-3p, target=R03G\_17291, score=2, range=411-433, str  
target 5' AGUACAUGAUUGGCGACGUGUUA 3'  
:~::~  
query 3' UCAUGUACUAACUGCUGCACAGU 5'  
query=miR7803b-3p, target=R03G\_16742, score=2, range=411-433, str  
target 5' AGUACAUGAUUGGCGACGUGUUA 3'  
:~::~  
query 3' UCAUGUACUAACUGCUGCACAGU 5'  
query=miR7803b-3p, target=R03G\_02824, score=2, range=411-433, str  
target 5' AGUACAUGAUUGGCGACGUGUUA 3'  
:~::~  
query 3' UCAUGUACUAACUGCUGCACAGU 5'  
query=miR7803b-3p, target=R03G\_13714, score=2, range=411-433, str  
target 5' AGUACAUGAUUGGCGACGUGUUA 3'  
:~::~  
query 3' UCAUGUACUAACUGCUGCACAGU 5'  
query=miR7803b-3p, target=R03G\_16372, score=2, range=411-433, str  
target 5' AGUACAUGAUUGGCGACGUGUUA 3'  
:~::~  
query 3' UCAUGUACUAACUGCUGCACAGU 5'  
query=miR7803b-3p, target=R03G\_12663, score=2, range=246-268, str  
target 5' AGUACAUGAUUGGCGACGUGUUA 3'  
:~::~  
query 3' UCAUGUACUAACUGCUGCACAGU 5'  
query=miR7803b-3p, target=R03G\_17355, score=2, range=246-268, str  
target 5' AGUACAUGAUUGGCGACGUGUUA 3'  
:~::~  
query 3' UCAUGUACUAACUGCUGCACAGU 5'  
query=miR7803b-3p, target=R03G\_01962, score=2, range=162-184, str  
target 5' AGUACAUGAUUGGCGACGUGUUA 3'  
:~::~  
query 3' UCAUGUACUAACUGCUGCACAGU 5'  
query=miR7803b-3p, target=R03G\_16706, score=2, range=135-157, str  
target 5' AGUACAUGAUUGGCGACGUGUUA 3'  
:~::~  
query 3' UCAUGUACUAACUGCUGCACAGU 5'  
query=miR7803b-3p, target=R03G\_09193, score=2, range=135-157, str  
target 5' AGUACAUGAUUGGCGACGUGUUA 3'  
:~::~  
query 3' UCAUGUACUAACUGCUGCACAGU 5'  
query=miR7803b-3p, target=R03G\_04682, score=2, range=411-433, str  
target 5' AGUACAUGAUUGGCGACGUGUUA 3'

query 3' UCAUGUACUAACUGCUGCACAGU 5'  
query=miR7803b-3p, target=R03G\_10771, score=2, range=162-184, str  
target 5' AGUACAUAUUUGGCGACGUGUCA 3'  
query 3' UCAUGUACUAACUGCUGCACAGU 5'  
query=miR7803b-3p, target=R03G\_07739, score=3, range=162-184, str  
target 5' AGUACAUGAUUGGCGUCGUGUCA 3'  
query 3' UCAUGUACUAACUGCUGCACAGU 5'  
query=miR7803b-3p, target=R03G\_14770, score=3.5, range=411-433,  
strand=1  
target 5' AGUACAUGAUUGGCGACGUGCCG 3'  
query 3' UCAUGUACUAACUGCUGCACAGU 5'  
query=miR7803b-3p, target=R03G\_07984, score=3.5, range=411-433,  
strand=1  
target 5' AGUACAUGAUUGGCGACGUGCCG 3'  
query 3' UCAUGUACUAACUGCUGCACAGU 5'  
query=miR5758, target=R03G\_11521, score=0, range=1471-1489, stran  
target 5' CAAGGACAUUCUUCACUUA 3'  
query 3' GUUCCUGUAAGAAGUGAAU 5'  
query=miR5758, target=R03G\_09539, score=0, range=2509-2527, stran  
target 5' CAAGGACAUUCUUCACUUA 3'  
query 3' GUUCCUGUAAGAAGUGAAU 5'  
query=miR5758, target=R03G\_13796, score=0, range=2509-2527, stran  
target 5' CAAGGACAUUCUUCACUUA 3'  
query 3' GUUCCUGUAAGAAGUGAAU 5'  
query=miR5758, target=R03G\_03627, score=2, range=526-544, strand=  
target 5' CAAGGACAUUCUUCACUGA 3'  
query 3' GUUCCUGUAAGAAGUGAAU 5'  
query=miR5758, target=R03G\_01708, score=2, range=526-544, strand=  
target 5' CAAGGACAUUCUUCACUGA 3'  
query 3' GUUCCUGUAAGAAGUGAAU 5'  
query=miR5758, target=R03G\_15437, score=3, range=798-816, strand=  
target 5' CGGUGACAUUCUUCAUUUA 3'  
query 3' GUUCCUGUAAGAAGUGAAU 5'  
query=miR5758, target=R03G\_01900, score=3, range=243-260, strand=





query 3' GUUCCUGUAAGAAGUGAAU 5'  
query=miR5758, target=R03G\_05240, score=4, range=215-232, strand=  
target 5' CAAGGUUUAUUCUU-ACUUA 3'  
..... :..... :.....  
query 3' GUUCCUGUAAGAAGUGAAU 5'  
query=miR5758, target=R03G\_02933, score=4, range=296-314, strand=  
target 5' CAACUACAUCUUCACUUA 3'  
... :... :.....  
query 3' GUUCCUGUAAGAAGUGAAU 5'  
query=miR5758, target=R03G\_12572, score=4, range=387-405, strand=  
target 5' CAUGAUCUUCUUCGCUUA 3'  
:: : .....  
query 3' GUUCCUGUAAGAAGUGAAU 5'  
query=miR5758, target=R03G\_01038, score=4, range=56-73, strand=1  
target 5' CAAUG-CAUUCUUCACAUA 3'  
... : ..... :  
query 3' GUUCCUGUAAGAAGUGAAU 5'  
query=miR5758, target=R03G\_12835, score=4, range=1978-1997, stran  
target 5' CAAGGCACAUUCUCAAUUC 3'  
..... : ..... :  
query 3' GUUCC-UGUAAGAAGUGAAU 5'  
query=miR5758, target=R03G\_00347, score=4, range=199-216, strand=  
target 5' UAAAG-CAUUUUUCACUUG 3'  
... : .....  
query 3' GUUCCUGUAAGAAGUGAAU 5'  
query=miR5758, target=R03G\_07743, score=4, range=434-451, strand=  
target 5' UAAAG-CAUUCUUUACUUG 3'  
... : .....  
query 3' GUUCCUGUAAGAAGUGAAU 5'  
query=miR5758, target=R03G\_12515, score=4, range=223-240, strand=  
target 5' CAA-GACAUUAUUCACUUC 3'  
... : ..... :.....  
query 3' GUUCCUGUAAGAAGUGAAU 5'  
query=miR5038a, target=R03G\_17155, score=0, range=632-652, strand  
target 5' UGGAAAAGGCCAAGAUUCCCA 3'  
..... :..... :.....  
query 3' ACCUUUCCGGUUCUAAGGGU 5'  
query=miR5038a, target=R03G\_05926, score=0, range=632-652, strand  
target 5' UGGAAAAGGCCAAGAUUCCCA 3'  
..... :..... :.....  
query 3' ACCUUUCCGGUUCUAAGGGU 5'  
query=miR5038a, target=R03G\_09928, score=0, range=632-652, strand  
target 5' UGGAAAAGGCCAAGAUUCCCA 3'  
..... :..... :.....  
query 3' ACCUUUCCGGUUCUAAGGGU 5'





query 3' GACUACGAGACCGUAUAAGU 5'  
query=miR9674b-3p, target=R03G\_07279, score=4, range=3078-3097,  
strand=-1  
target 5' CUGUUGCUUUGGCAGAUUCA 3'

query 3' GACUACGAGACCGUAUAAGU 5'  
query=miR9674b-3p, target=R03G\_16585, score=4, range=188-206,  
strand=-1  
target 5' CUG-UGGUCUGGAAUAUUCA 3'

query 3' GACUACGAGACCGUAUAAGU 5'  
query=miR528-5p, target=R03G\_09951, score=0, range=29-49, strand=  
target 5' CCUCCUCUCAUCCCAUUGCA 3'

query 3' GGAGGAGAGUAGGGGUAAGGU 5'  
query=miR528-5p, target=R03G\_05148, score=4, range=400-420, stran  
target 5' CCACCUGUCAUCCCUAUUCCU 3'

query 3' GGAGGAGAGUAGGGGUAAGGU 5'  
query=miR528-5p, target=R03G\_05364, score=4, range=1573-1593,  
strand=-1  
target 5' UCUUUUUUCAUCCGCAUUGCA 3'

query 3' GGAGGAGAGUAGGGGUAAGGU 5'  
query=miR528-5p, target=R03G\_05871, score=4, range=955-975, stran  
target 5' UCUCACUCAUCCCUAUUUGCG 3'

query 3' GGAGGAGAGUAGGGGUAAGGU 5'  
query=miR4397-3p, target=R03G\_07123, score=0, range=769-790, stra  
target 5' AGUCUUUCUCCACAUCUUUGAA 3'

query 3' UCAGAAAGAGGUGUAGAAACUU 5'  
query=miR4397-3p, target=R03G\_11284, score=0, range=1012-1033,  
strand=-1  
target 5' AGUCUUUCUCCACAUCUUUGAA 3'

query 3' UCAGAAAGAGGUGUAGAAACUU 5'  
query=miR4397-3p, target=R03G\_13853, score=0, range=58-79, strand  
target 5' AGUCUUUCUCCACAUCUUUGAA 3'

query 3' UCAGAAAGAGGUGUAGAAACUU 5'  
query=miR4397-3p, target=R03G\_00705, score=0, range=1012-1033,  
strand=-1  
target 5' AGUCUUUCUCCACAUCUUUGAA 3'

```
.....
query 3' UCAGAAAGAGGUGUAGAAACUU 5'
query=miR4397-3p, target=R03G_03562, score=0, range=742-763, stra
target 5' AGUCUUUCUCCACAUCUUUGAA 3'
.....
query 3' UCAGAAAGAGGUGUAGAAACUU 5'
query=miR4397-3p, target=R03G_10802, score=0, range=130-151, stra
target 5' AGUCUUUCUCCACAUCUUUGAA 3'
.....
query 3' UCAGAAAGAGGUGUAGAAACUU 5'
query=miR4397-3p, target=R03G_13302, score=0, range=1009-1030,
strand=-1
target 5' AGUCUUUCUCCACAUCUUUGAA 3'
.....
query 3' UCAGAAAGAGGUGUAGAAACUU 5'
query=miR4397-3p, target=R03G_05372, score=4, range=1946-1967,
strand=-1
target 5' AGUGCAUCGCCACAUCUUUGAA 3'
... :: .....
query 3' UCAGAAAGAGGUGUAGAAACUU 5'
query=miR4413b, target=R03G_14270, score=4, range=120-141, strand
target 5' GGGAGAGUUAUACUUGUUCUUG 3'
... :: .....
query 3' UCCACUGAAUAUGAACGAGAAU 5'
query=miR7716-5p, target=R03G_15587, score=1, range=212-234, stra
target 5' GUCUCGUUCUUAUCUUAUCAGCUA 3'
.....
query 3' CAGAGCAAGAAUGAAUAGUUGAU 5'
query=miR7716-5p, target=R03G_08791, score=3, range=128-150, stra
target 5' GUCUCGUUCUGGCUUAUCAACUA 3'
.....
query 3' CAGAGCAAGAAUGAAUAGUUGAU 5'
query=miR482e, target=R03G_02851, score=1, range=1072-1092, stran
target 5' CUUAGGCAGAGGAAUAGGCAA 3'
... :: .....
query 3' GAA-CCGUCUCCUUAUCCGUU 5'
query=miR482e, target=R03G_12958, score=1, range=892-912, strand=
target 5' CUUAGGCAGAGGAAUAGGCAA 3'
... :: .....
query 3' GAA-CCGUCUCCUUAUCCGUU 5'
query=miR482e, target=R03G_07982, score=1, range=1072-1092, stran
target 5' CUUAGGCAGAGGAAUAGGCAA 3'
... :: .....
query 3' GAA-CCGUCUCCUUAUCCGUU 5'
query=miR482e, target=R03G_02849, score=1, range=1072-1092, stran
```

target 5' CUUAGGCAGAGGAAUAGGCAA 3'  
::: ::::::::::::::::::::  
query 3' GAA-CCGUCUCCUUAUCCGUU 5'  
query=miR482e, target=R03G\_05217, score=1, range=1072-1092, stran  
target 5' CUUAGGCAGAGGAAUAGGCAA 3'  
::: ::::::::::::::::::::  
query 3' GAA-CCGUCUCCUUAUCCGUU 5'  
query=miR482e, target=R03G\_07035, score=1, range=1072-1092, stran  
target 5' CUUAGGCAGAGGAAUAGGCAA 3'  
::: ::::::::::::::::::::  
query 3' GAA-CCGUCUCCUUAUCCGUU 5'  
query=miR482e, target=R03G\_00697, score=1, range=1072-1092, stran  
target 5' CUUAGGCAGAGGAAUAGGCAA 3'  
::: ::::::::::::::::::::  
query 3' GAA-CCGUCUCCUUAUCCGUU 5'  
query=miR482e, target=R03G\_17425, score=1, range=1072-1092, stran  
target 5' CUUAGGCAGAGGAAUAGGCAA 3'  
::: ::::::::::::::::::::  
query 3' GAA-CCGUCUCCUUAUCCGUU 5'  
query=miR482e, target=R03G\_12650, score=1, range=1072-1092, stran  
target 5' CUUAGGCAGAGGAAUAGGCAA 3'  
::: ::::::::::::::::::::  
query 3' GAA-CCGUCUCCUUAUCCGUU 5'  
query=miR482e, target=R03G\_01965, score=1, range=1072-1092, stran  
target 5' CUUAGGCAGAGGAAUAGGCAA 3'  
::: ::::::::::::::::::::  
query 3' GAA-CCGUCUCCUUAUCCGUU 5'  
query=miR482e, target=R03G\_08655, score=1, range=1072-1092, stran  
target 5' CUUAGGCAGAGGAAUAGGCAA 3'  
::: ::::::::::::::::::::  
query 3' GAA-CCGUCUCCUUAUCCGUU 5'  
query=miR482e, target=R03G\_08650, score=1, range=1072-1092, stran  
target 5' CUUAGGCAGAGGAAUAGGCAA 3'  
::: ::::::::::::::::::::  
query 3' GAA-CCGUCUCCUUAUCCGUU 5'  
query=miR482e, target=R03G\_12973, score=1, range=1072-1092, stran  
target 5' CUUAGGCAGAGGAAUAGGCAA 3'  
::: ::::::::::::::::::::  
query 3' GAA-CCGUCUCCUUAUCCGUU 5'  
query=miR482e, target=R03G\_15259, score=2, range=1072-1092, stran  
target 5' CUUAGGCAGAGGAAUAGGUAA 3'  
::: ::::::::::::::::::::  
query 3' GAA-CCGUCUCCUUAUCCGUU 5'  
query=miR482e, target=R03G\_11778, score=2, range=1072-1092, stran  
target 5' CUUAGGCAGAGGAAUAGGUAA 3'

query 3' GAA-CCGUCUCCUUAUCCGUU 5'  
query=miR482e, target=R03G\_16408, score=2, range=1072-1092, stran  
target 5' CUUGGGAAGAGGAAUAGGCAA 3'

query 3' GAA-CCGUCUCCUUAUCCGUU 5'  
query=miR482e, target=R03G\_08310, score=3, range=129-148, strand=  
target 5' AUUGACCGAGGAAUAGGCAA 3'

query 3' GAACCGUCUCCUUAUCCGUU 5'  
query=miR482e, target=R03G\_00068, score=3.5, range=277-296, stran  
target 5' GGUGGAGGAGGAAUAGGCAA 3'

query 3' GAACCGUCUCCUUAUCCGUU 5'  
query=miR482e, target=R03G\_05305, score=4, range=1161-1179, stran  
target 5' CUUGGCUGAGGAA-GGGCAA 3'

query 3' GAACCGUCUCCUUAUCCGUU 5'  
query=miR482e, target=R03G\_08315, score=4, range=129-147, strand=  
target 5' AUUAGCAGAGGAA-AGGCAA 3'

query 3' GAACCGUCUCCUUAUCCGUU 5'  
query=miR482e, target=R03G\_02737, score=4, range=2080-2100, stran  
target 5' AUUAGCACGGGGAAUAGGCAA 3'

query 3' GAACCGU-CUCCUUAUCCGUU 5'  
query=miR482e, target=R03G\_10728, score=4, range=991-1011, strand  
target 5' CUUGGGAAGAGAAAUAGGCAA 3'

query 3' GAA-CCGUCUCCUUAUCCGUU 5'  
query=miR482e, target=R03G\_03247, score=4, range=508-526, strand=  
target 5' CUUCACA-AGGAAUAGGCAA 3'

query 3' GAACCGUCUCCUUAUCCGUU 5'  
query=miR5766, target=R03G\_05217, score=0, range=1071-1091, stran  
target 5' CUUGCCUAUUCUCUGCCUAA 3'

query 3' GAACGGAUAAGGAGACGGAUU 5'  
query=miR5766, target=R03G\_07982, score=0, range=1071-1091, stran  
target 5' CUUGCCUAUUCUCUGCCUAA 3'

query 3' GAACGGAUAAGGAGACGGAUU 5'  
query=miR5766, target=R03G\_02849, score=0, range=1071-1091, stran  
target 5' CUUGCCUAUUCUCUGCCUAA 3'

query 3' GAACGGAUAAAGGAGACGGAUU 5'  
query=miR5766, target=R03G\_07035, score=0, range=1071-1091, stran  
target 5' CUUGCCUAUUCCUCUGCCUAA 3'  
.....  
query 3' GAACGGAUAAAGGAGACGGAUU 5'  
query=miR5766, target=R03G\_00697, score=0, range=1071-1091, stran  
target 5' CUUGCCUAUUCCUCUGCCUAA 3'  
.....  
query 3' GAACGGAUAAAGGAGACGGAUU 5'  
query=miR5766, target=R03G\_01965, score=0, range=1071-1091, stran  
target 5' CUUGCCUAUUCCUCUGCCUAA 3'  
.....  
query 3' GAACGGAUAAAGGAGACGGAUU 5'  
query=miR5766, target=R03G\_08650, score=0, range=1071-1091, stran  
target 5' CUUGCCUAUUCCUCUGCCUAA 3'  
.....  
query 3' GAACGGAUAAAGGAGACGGAUU 5'  
query=miR5766, target=R03G\_08655, score=0, range=1071-1091, stran  
target 5' CUUGCCUAUUCCUCUGCCUAA 3'  
.....  
query 3' GAACGGAUAAAGGAGACGGAUU 5'  
query=miR5766, target=R03G\_12973, score=0, range=1071-1091, stran  
target 5' CUUGCCUAUUCCUCUGCCUAA 3'  
.....  
query 3' GAACGGAUAAAGGAGACGGAUU 5'  
query=miR5766, target=R03G\_02851, score=0, range=1071-1091, stran  
target 5' CUUGCCUAUUCCUCUGCCUAA 3'  
.....  
query 3' GAACGGAUAAAGGAGACGGAUU 5'  
query=miR5766, target=R03G\_12650, score=0, range=1071-1091, stran  
target 5' CUUGCCUAUUCCUCUGCCUAA 3'  
.....  
query 3' GAACGGAUAAAGGAGACGGAUU 5'  
query=miR5766, target=R03G\_12958, score=0, range=891-911, strand=  
target 5' CUUGCCUAUUCCUCUGCCUAA 3'  
.....  
query 3' GAACGGAUAAAGGAGACGGAUU 5'  
query=miR5766, target=R03G\_17425, score=0, range=1071-1091, stran  
target 5' CUUGCCUAUUCCUCUGCCUAA 3'  
.....  
query 3' GAACGGAUAAAGGAGACGGAUU 5'  
query=miR5766, target=R03G\_15259, score=1, range=1071-1091, stran  
target 5' CUUACCUAUUCCUCUGCCUAA 3'  
... ..  
query 3' GAACGGAUAAAGGAGACGGAUU 5'



```

query=miR5766, target=R03G_11778, score=1, range=1071-1091, stran
target 5' CUUACCUAUUCCUCUGCCUAA 3'
::: :::::::::::::::::::::
query 3' GAACGGAUAAAGGAGACGGAUU 5'
query=miR5766, target=R03G_08741, score=3, range=1074-1094, stran
target 5' CUAGCAUUAUCCUCUGCCUGA 3'
:: :: :::::::::::::::::::::
query 3' GAACGGAUAAAGGAGACGGAUU 5'
query=miR5766, target=R03G_16408, score=4, range=1071-1091, stran
target 5' CUUGCCUAUUCCUCUCCCAA 3'
::::::::::::::::::: :: ::
query 3' GAACGGAUAAAGGAGACGGAUU 5'
query=miR7763-5p, target=R03G_19004, score=0, range=1548-1569,
strand=-1
target 5' CUAUCCCCAGCACGAUGAAGUU 3'
:::::::::::::::::::
query 3' GAUAGGGGUCGUGCUACUUCAA 5'
query=miR7763-5p, target=R03G_19001, score=0, range=1252-1273,
strand=-1
target 5' CUAUCCCCAGCACGAUGAAGUU 3'
:::::::::::::::::::
query 3' GAUAGGGGUCGUGCUACUUCAA 5'
query=miR7763-5p, target=R03G_05488, score=4, range=1808-1829,
strand=1
target 5' CUAACCCCAUCAUGAUGAAGUU 3'
::: ::::: :::::::::::::::::::::
query 3' GAUAGGGGUCGUGCUACUUCAA 5'
query=miR7763-5p, target=R03G_00708, score=4, range=1739-1760,
strand=1
target 5' CUAACCCCAUCAUGAUGAAGUU 3'
::: ::::: :::::::::::::::::::::
query 3' GAUAGGGGUCGUGCUACUUCAA 5'
query=miR7763-5p, target=R03G_00340, score=4, range=1226-1246,
strand=-1
target 5' CU-UCUUCAGCACGACGAAGUU 3'
:: :.:.:.:.:.:.:.:.:.:.: :::::::
query 3' GAUAGGGGUCGUGCUACUUCAA 5'
query=miR5020c, target=R03G_10281, score=3, range=947-964, strand
target 5' GUCGACCUCUUGC-UGCUA 3'
::::::::::::::::::: :::::
query 3' CAGCUGGAGAACGUACGGU 5'
query=miR5020c, target=R03G_03849, score=3, range=258-275, strand
target 5' GUUG-UCUCUUGCAUGCCU 3'
:::.: .:::::::::::::::::::
query 3' CAGCUGGAGAACGUACGGU 5'

```

query=miR5020c, target=R03G\_10250, score=3.5, range=457-475, strand  
target 5' AUAGGCCUCUUGCAUGCCC 3'  
: :::::::::::::::  
query 3' CAGCUGGAGAACGUACGGU 5'  
query=miR5020c, target=R03G\_11325, score=4, range=330-348, strand  
target 5' GUCGGUCUCUCCAUGUCA 3'  
: :::::::::::::::  
query 3' CAGCUGGAGAACGUACGGU 5'  
query=miR5020c, target=R03G\_05820, score=4, range=1348-1365, strand  
target 5' UUCGACUUCUUGC-UGCCA 3'  
: :::::::::::::::  
query 3' CAGCUGGAGAACGUACGGU 5'  
query=miR5020c, target=R03G\_14589, score=4, range=180-197, strand  
target 5' GUC-UCUUCUUGCAUGUCA 3'  
: :::::::::::::::  
query 3' CAGCUGGAGAACGUACGGU 5'  
query=miR5227, target=R03G\_04218, score=0, range=837-858, strand=  
target 5' AUCCUCAACUUCUUCUUCUUCA 3'  
: :::::::::::::::  
query 3' UAGGAGUUGAAGAAGAAGAAGU 5'  
query=miR5227, target=R03G\_02836, score=0, range=837-858, strand=  
target 5' AUCCUCAACUUCUUCUUCUUCA 3'  
: :::::::::::::::  
query 3' UAGGAGUUGAAGAAGAAGAAGU 5'  
query=miR5227, target=R03G\_09957, score=0, range=837-858, strand=  
target 5' AUCCUCAACUUCUUCUUCUUCA 3'  
: :::::::::::::::  
query 3' UAGGAGUUGAAGAAGAAGAAGU 5'  
query=miR5227, target=R03G\_16134, score=0, range=837-858, strand=  
target 5' AUCCUCAACUUCUUCUUCUUCA 3'  
: :::::::::::::::  
query 3' UAGGAGUUGAAGAAGAAGAAGU 5'  
query=miR5227, target=R03G\_15284, score=0, range=837-858, strand=  
target 5' AUCCUCAACUUCUUCUUCUUCA 3'  
: :::::::::::::::  
query 3' UAGGAGUUGAAGAAGAAGAAGU 5'  
query=miR5227, target=R03G\_03104, score=0, range=837-858, strand=  
target 5' AUCCUCAACUUCUUCUUCUUCA 3'  
: :::::::::::::::  
query 3' UAGGAGUUGAAGAAGAAGAAGU 5'  
query=miR5227, target=R03G\_09933, score=0, range=837-858, strand=  
target 5' AUCCUCAACUUCUUCUUCUUCA 3'  
: :::::::::::::::  
query 3' UAGGAGUUGAAGAAGAAGAAGU 5'  
query=miR5227, target=R03G\_01940, score=0, range=795-816, strand=





query=miR5227, target=R03G\_03568, score=2.5, range=582-603, stran  
target 5' AUCUUCUUCUUCUUCUUCUUCA 3'  
::::: ::::::::::::::  
query 3' UAGGAGUUGAAGAAGAAGAAGU 5'  
query=miR5227, target=R03G\_14458, score=2.5, range=102-123, stran  
target 5' AUGUUCACCUUCUUCUUCUUCA 3'  
:: .::: ::::::::::::::  
query 3' UAGGAGUUGAAGAAGAAGAAGU 5'  
query=miR5227, target=R03G\_06538, score=3, range=1130-1151, stran  
target 5' UCCCUCAACUUCUUCUUCUUC 3'  
::::: ::::::::::::::  
query 3' UAGGAGUUGAAGAAGAAGAAGU 5'  
query=miR5227, target=R03G\_07001, score=3, range=171-192, strand=  
target 5' AUCCUCUUCUUCUUCUUCUUCU 3'  
::::: ::::::::::::::  
query 3' UAGGAGUUGAAGAAGAAGAAGU 5'  
query=miR5227, target=R03G\_07000, score=3, range=171-192, strand=  
target 5' AUCCUCUUCUUCUUCUUCUUCU 3'  
::::: ::::::::::::::  
query 3' UAGGAGUUGAAGAAGAAGAAGU 5'  
query=miR5227, target=R03G\_05565, score=3, range=663-684, strand=  
target 5' CUCCACACCUUCUUCUUCUUCA 3'  
::: :: ::::::::::::::  
query 3' UAGGAGUUGAAGAAGAAGAAGU 5'  
query=miR5227, target=R03G\_05857, score=3, range=27-48, strand=-1  
target 5' CUUUUCAACUUUUUCUUCUUCA 3'  
..... ::::::::::::::  
query 3' UAGGAGUUGAAGAAGAAGAAGU 5'  
query=miR5227, target=R03G\_07659, score=3, range=465-486, strand=  
target 5' AUCUUCAAUCUCUUCUUCUUCA 3'  
..... ::::::::::::::  
query 3' UAGGAGUUGAAGAAGAAGAAGU 5'  
query=miR5227, target=R03G\_07328, score=3, range=411-432, strand=  
target 5' AUCCUCACUUUCUUUUUCUUCG 3'  
::::: . ::::::::::::::  
query 3' UAGGAGUUGAAGAAGAAGAAGU 5'  
query=miR5227, target=R03G\_06107, score=3, range=1311-1332, stran  
target 5' CUCUUCGACUUCUUCUUCUUCU 3'  
..... ::::::::::::::  
query 3' UAGGAGUUGAAGAAGAAGAAGU 5'  
query=miR5227, target=R03G\_14397, score=3, range=1083-1104, stran  
target 5' GGCUUCGAUUUCUUCUUCUUCA 3'  
. ::::::::::::::  
query 3' UAGGAGUUGAAGAAGAAGAAGU 5'  
query=miR5227, target=R03G\_14329, score=3, range=57-78, strand=-1



::::: :::::::::::::::  
query 3' UAGGAGUUGAAGAAGAAGAAGU 5'  
query=miR5227, target=R03G\_14543, score=3, range=1545-1566, stran  
target 5' AUCAUCAUCUUCUUCUUCUUCU 3'  
::: :: :::::::::::::::  
query 3' UAGGAGUUGAAGAAGAAGAAGU 5'  
query=miR5227, target=R03G\_04550, score=3, range=993-1014, strand  
target 5' AUCCUCCUCUUCUUCUUCUUCU 3'  
::::: :::::::::::::::  
query 3' UAGGAGUUGAAGAAGAAGAAGU 5'  
query=miR5227, target=R03G\_13627, score=3, range=273-294, strand=  
target 5' UCCUCUUCUUCUUCUUCUUCA 3'  
::::: :::::::::::::::  
query 3' UAGGAGUUGAAGAAGAAGAAGU 5'  
query=miR5227, target=R03G\_16847, score=3, range=936-957, strand=  
target 5' CUCCUCUUCUUCUUCUUCUUCA 3'  
::::: :::::::::::::::  
query 3' UAGGAGUUGAAGAAGAAGAAGU 5'  
query=miR5227, target=R03G\_08412, score=3, range=639-660, strand=  
target 5' AUCCUCUUCUUCUUCUUCUUCU 3'  
::::: :::::::::::::::  
query 3' UAGGAGUUGAAGAAGAAGAAGU 5'  
query=miR5227, target=R03G\_01052, score=3, range=879-900, strand=  
target 5' CUCCUCUUCUUCUUCUUCUUCA 3'  
::::: :::::::::::::::  
query 3' UAGGAGUUGAAGAAGAAGAAGU 5'  
query=miR5227, target=R03G\_03638, score=3, range=162-183, strand=  
target 5' CUCCUCCUCUUCUUCUUCUUCA 3'  
::::: :::::::::::::::  
query 3' UAGGAGUUGAAGAAGAAGAAGU 5'  
query=miR5227, target=R03G\_08508, score=3, range=540-561, strand=  
target 5' AUCCUCUUCUUCUUCUUCUUCU 3'  
::::: :::::::::::::::  
query 3' UAGGAGUUGAAGAAGAAGAAGU 5'  
query=miR5227, target=R03G\_01098, score=3, range=378-399, strand=  
target 5' CUCCUCCUCUUCUUCUUCUUCA 3'  
::::: :::::::::::::::  
query 3' UAGGAGUUGAAGAAGAAGAAGU 5'  
query=miR5227, target=R03G\_15201, score=3, range=543-564, strand=  
target 5' UCCUCCUCUUCUUCUUCUUCA 3'  
::::: :::::::::::::::  
query 3' UAGGAGUUGAAGAAGAAGAAGU 5'  
query=miR5227, target=R03G\_11593, score=3, range=63-84, strand=-1  
target 5' UUCAUCAUCUUCUUCUUCUUCA 3'  
:: :: :::::::::::::::

query 3' UAGGAGUUGAAGAAGAAGAAGU 5'  
query=miR5227, target=R03G\_08160, score=3, range=984-1004, strand  
target 5' ACCUUUAA-UUCUUCUUCUUCA 3'  
: :.:.:.: :.:.:.:.:  
query 3' UAGGAGUUGAAGAAGAAGAAGU 5'  
query=miR5227, target=R03G\_09393, score=3, range=744-765, strand=  
target 5' AUCAUCCUCUUCUUCUUCUUCA 3'  
: :.:.:.: :.:.:.:.:  
query 3' UAGGAGUUGAAGAAGAAGAAGU 5'  
query=miR5227, target=R03G\_08267, score=3, range=1272-1293, stran  
target 5' AUCAUCCUCUUCUUCUUCUUCA 3'  
: :.:.:.: :.:.:.:.:  
query 3' UAGGAGUUGAAGAAGAAGAAGU 5'  
query=miR5227, target=R03G\_07283, score=3, range=105-126, strand=  
target 5' CUCUUCGUCUUCUUCUUCUUCA 3'  
: :.:.:.: :.:.:.:.:  
query 3' UAGGAGUUGAAGAAGAAGAAGU 5'  
query=miR5227, target=R03G\_05857, score=3, range=174-195, strand=  
target 5' CUCCUCUUCUUCUUCUUCUUCA 3'  
: :.:.:.: :.:.:.:.:  
query 3' UAGGAGUUGAAGAAGAAGAAGU 5'  
query=miR5227, target=R03G\_10079, score=3, range=300-322, strand=  
target 5' AUCCAUCACCUUCUUCUUCUUC 3'  
: :.:.:.: :.:.:.:.:  
query 3' UAGG-AGUUGAAGAAGAAGAAGU 5'  
query=miR5227, target=R03G\_11015, score=3.5, range=20-42, strand=  
target 5' GUCUAUCGACUUCUUCUUCUUUA 3'  
: :.:.:.: :.:.:.:.:  
query 3' UAGG-AGUUGAAGAAGAAGAAGU 5'  
query=miR5227, target=R03G\_07279, score=3.5, range=3573-3594, str  
target 5' AUCCUCCGCUUCUUCUUCUUCUCA 3'  
: :.:.:.: :.:.:.:.:  
query 3' UAGGAGUUGAAGAAGAAGAAGU 5'  
query=miR5227, target=R03G\_09917, score=3.5, range=684-705, stran  
target 5' AUCUUCACUUCUUCUUUUUCU 3'  
: :.:.:.: :.:.:.:.:  
query 3' UAGGAGUUGAAGAAGAAGAAGU 5'  
query=miR5227, target=R03G\_06244, score=3.5, range=1458-1479, str  
target 5' AUCUUCUUCUUCUUCUUCUUUA 3'  
: :.:.:.: :.:.:.:.:  
query 3' UAGGAGUUGAAGAAGAAGAAGU 5'  
query=miR5227, target=R03G\_00057, score=3.5, range=1656-1677, str  
target 5' AUCCAGAGCUUCUUCUUUUUCA 3'  
: :.:.:.: :.:.:.:.:  
query 3' UAGGAGUUGAAGAAGAAGAAGU 5'



query=miR5227, target=R03G\_03357, score=3.5, range=48-69, strand=  
 target 5' UUCUUCAAGUUCUUCUUCUUCU 3'  
 :::::::::: :::::::::::::::  
 query 3' UAGGAGUUGAAGAAGAAGAAGU 5'  
 query=miR5227, target=R03G\_01458, score=3.5, range=858-879, stran  
 target 5' CUCUUCUACUUCUUCUUCUUCU 3'  
 :::::: :::::::::::::::  
 query 3' UAGGAGUUGAAGAAGAAGAAGU 5'  
 query=miR5227, target=R03G\_12945, score=3.5, range=1503-1524, str  
 target 5' UUCUUCUUCUUCUUCUUCUUCA 3'  
 :::::: :::::::::::::::  
 query 3' UAGGAGUUGAAGAAGAAGAAGU 5'  
 query=miR5227, target=R03G\_00312, score=3.5, range=744-765, stran  
 target 5' UUCUUCUUCUUCUUCUUCUUCA 3'  
 :::::: :::::::::::::::  
 query 3' UAGGAGUUGAAGAAGAAGAAGU 5'  
 query=miR5227, target=R03G\_03738, score=3.5, range=1761-1782, str  
 target 5' AUCAGCUGCUUCUUCUUCUUCA 3'  
 ::: : .:::::::::::::  
 query 3' UAGGAGUUGAAGAAGAAGAAGU 5'  
 query=miR5227, target=R03G\_15453, score=3.5, range=1580-1602, str  
 target 5' AAACUCAACAUCUUCUUCUUCG 3'  
 : :::::: :::::::::::::::  
 query 3' UAGGAGUUG-AAGAAGAAGAAGU 5'  
 query=miR5227, target=R03G\_08622, score=3.5, range=1218-1239,  
 strand=-1  
 target 5' AUUCUUGACUUCUUCUUCUUU 3'  
 :::::::::::::::  
 query 3' UAGGAGUUGAAGAAGAAGAAGU 5'  
 query=miR5227, target=R03G\_10411, score=3.5, range=1395-1416,  
 strand=-1  
 target 5' AAUUUCGACUUUUUCUUCUUCA 3'  
 : .:::::::::::::  
 query 3' UAGGAGUUGAAGAAGAAGAAGU 5'  
 query=miR5227, target=R03G\_10319, score=3.5, range=933-954, stran  
 target 5' AUCUUUAGGUUCUUUUUCUUCA 3'  
 :::::: :::::::::::::::  
 query 3' UAGGAGUUGAAGAAGAAGAAGU 5'  
 query=miR5227, target=R03G\_02254, score=3.5, range=840-861, stran  
 target 5' GUCCACAAUUUUUCUUCUUCG 3'  
 .:::: :::::::::::::::  
 query 3' UAGGAGUUGAAGAAGAAGAAGU 5'  
 query=miR5227, target=R03G\_06538, score=3.5, range=195-216, stran  
 target 5' AUCUUCGUUUUCUUCUUUCA 3'  
 :::::: .:::::::::::::

```

query 3' UAGGAGUUGAAGAAGAAGAAGU 5'
query=miR5227, target=R03G_13396, score=3.5, range=177-198, stran
target 5' AUUUUCAAUUACUUCUUCUUCA 3'
.....: :
query 3' UAGGAGUUGAAGAAGAAGAAGU 5'
query=miR5227, target=R03G_06685, score=3.5, range=1122-1143,
strand=-1
target 5' UUCUCCACUUCUUCUUCUUA 3'
:::: :
query 3' UAGGAGUUGAAGAAGAAGAAGU 5'
query=miR5227, target=R03G_11306, score=3.5, range=549-570, stran
target 5' AUUUUCCGCUUCUUCUUCUCC 3'
.....: :
query 3' UAGGAGUUGAAGAAGAAGAAGU 5'
query=miR5227, target=R03G_13926, score=3.5, range=1290-1311,
strand=-1
target 5' UCCUUGUUUUCUUCUUCUUCA 3'
..... :
query 3' UAGGAGUUGAAGAAGAAGAAGU 5'
query=miR5227, target=R03G_05498, score=3.5, range=123-144, stran
target 5' UUCUUCAUCUUCUUCUUCUUCA 3'
.....: :
query 3' UAGGAGUUGAAGAAGAAGAAGU 5'
query=miR5227, target=R03G_01827, score=3.5, range=99-120, strand
target 5' AUCUUCUACUUGUUCUUCUUCA 3'
.....: :
query 3' UAGGAGUUGAAGAAGAAGAAGU 5'
query=miR5227, target=R03G_03429, score=3.5, range=1113-1134,
strand=-1
target 5' AUCCUCAGAUUCUUCUUCUGCA 3'
.....: :
query 3' UAGGAGUUGAAGAAGAAGAAGU 5'
query=miR5227, target=R03G_06850, score=3.5, range=522-543, stran
target 5' AUCCUCAUCUUCUUCAUCUUCG 3'
.....: :
query 3' UAGGAGUUGAAGAAGAAGAAGU 5'
query=miR5227, target=R03G_05173, score=3.5, range=750-771, stran
target 5' AUCUUCAUCCUCUUCUUCUUCA 3'
.....: :
query 3' UAGGAGUUGAAGAAGAAGAAGU 5'
query=miR5227, target=R03G_07261, score=3.5, range=810-831, stran
target 5' UCCUCUAUUUCUUCUUCUUCU 3'
.....: :
query 3' UAGGAGUUGAAGAAGAAGAAGU 5'
query=miR5227, target=R03G_03381, score=3.5, range=507-528, stran

```

target 5' CUCUUCUACUUCUUCUUCUUCU 3'  
::: :  
query 3' UAGGAGUUGAAGAAGAAGAAGU 5'  
query=miR5227, target=R03G\_11176, score=3.5, range=597-618, stran  
target 5' CUCCUCGUCUUCUUCUUCUUC 3'  
::: :  
query 3' UAGGAGUUGAAGAAGAAGAAGU 5'  
query=miR5227, target=R03G\_15658, score=3.5, range=408-429, stran  
target 5' UUCUUCUACUUCUUCUUCUUCU 3'  
::: :  
query 3' UAGGAGUUGAAGAAGAAGAAGU 5'  
query=miR5227, target=R03G\_11924, score=3.5, range=252-273, stran  
target 5' CUCAUCAGCUUCUUCUUCUUCU 3'  
:: :  
query 3' UAGGAGUUGAAGAAGAAGAAGU 5'  
query=miR5227, target=R03G\_09312, score=3.5, range=216-238, stran  
target 5' GUUUUAAAGCUUCUUCUUCUUCA 3'  
.:: :  
query 3' UAGGAGUU-GAAGAAGAAGAAGU 5'  
query=miR5227, target=R03G\_09135, score=3.5, range=3882-3903,  
strand=-1  
target 5' UUCGGCAAUUUCUUCUUCUUCA 3'  
:: :  
query 3' UAGGAGUUGAAGAAGAAGAAGU 5'  
query=miR5227, target=R03G\_10467, score=3.5, range=195-216, stran  
target 5' UUCUUCUUCUUCUUCUUCUUCA 3'  
::: :  
query 3' UAGGAGUUGAAGAAGAAGAAGU 5'  
query=miR5227, target=R03G\_05884, score=3.5, range=1203-1224,  
strand=-1  
target 5' UUCUUCUUCUUCUUCUUCUUCA 3'  
::: :  
query 3' UAGGAGUUGAAGAAGAAGAAGU 5'  
query=miR5227, target=R03G\_01472, score=3.5, range=1404-1425,  
strand=-1  
target 5' UUCUUCUUCUUCUUCUUCUUCA 3'  
::: :  
query 3' UAGGAGUUGAAGAAGAAGAAGU 5'  
query=miR5227, target=R03G\_05552, score=3.5, range=99-120, strand  
target 5' UUCAUCGUCUUCUUCUUCUUCA 3'  
:: :  
query 3' UAGGAGUUGAAGAAGAAGAAGU 5'  
query=miR5227, target=R03G\_07254, score=3.5, range=1494-1515,  
strand=-1  
target 5' CUCUUCUUCUUCUUCUUCUUCA 3'

:::: ::::::::::::::  
query 3' UAGGAGUUGAAGAAGAAGAAGU 5'  
query=miR5227, target=R03G\_07634, score=3.5, range=1629-1650,  
strand=-1  
target 5' UUCUUCUUCUUCUUCUUCUUCA 3'  
:::: ::::::::::::::  
query 3' UAGGAGUUGAAGAAGAAGAAGU 5'  
query=miR5227, target=R03G\_00658, score=3.5, range=1200-1221,  
strand=-1  
target 5' UUCCUCUUCUUCUUCUUCUUCG 3'  
:::: ::::::::::::::  
query 3' UAGGAGUUGAAGAAGAAGAAGU 5'  
query=miR5227, target=R03G\_12990, score=3.5, range=534-555, stran  
target 5' UUCUUCUUCUUCUUCUUCUUCA 3'  
:::: ::::::::::::::  
query 3' UAGGAGUUGAAGAAGAAGAAGU 5'  
query=miR5227, target=R03G\_06058, score=3.5, range=372-393, stran  
target 5' UUCUUCUUCUUCUUCUUCUUCA 3'  
:::: ::::::::::::::  
query 3' UAGGAGUUGAAGAAGAAGAAGU 5'  
query=miR5227, target=R03G\_03973, score=3.5, range=567-588, stran  
target 5' AUCCGCACUUUCUUCUUCUUC 3'  
:::: ::::::::::::::  
query 3' UAGGAGUUGAAGAAGAAGAAGU 5'  
query=miR5227, target=R03G\_14740, score=3.5, range=777-798, stran  
target 5' UUCUUCUUCUUCUUCUUCUUCA 3'  
:::: ::::::::::::::  
query 3' UAGGAGUUGAAGAAGAAGAAGU 5'  
query=miR5227, target=R03G\_00906, score=3.5, range=363-384, stran  
target 5' UUCUUCUUCUUCUUCUUCUUCA 3'  
:::: ::::::::::::::  
query 3' UAGGAGUUGAAGAAGAAGAAGU 5'  
query=miR5227, target=R03G\_15854, score=3.5, range=669-690, stran  
target 5' AUCUUCUUCUUCUUCUUCUUCU 3'  
:::: ::::::::::::::  
query 3' UAGGAGUUGAAGAAGAAGAAGU 5'  
query=miR5227, target=R03G\_05540, score=3.5, range=180-201, stran  
target 5' UUCUUCUUCUUCUUCUUCUUCA 3'  
:::: ::::::::::::::  
query 3' UAGGAGUUGAAGAAGAAGAAGU 5'  
query=miR5227, target=R03G\_09134, score=3.5, range=555-576, stran  
target 5' UUCUUCUUCUUCUUCUUCUUCA 3'  
:::: ::::::::::::::  
query 3' UAGGAGUUGAAGAAGAAGAAGU 5'  
query=miR5227, target=R03G\_14175, score=3.5, range=135-156, stran





query=miR5227, target=R03G\_10982, score=4, range=1254-1275, stran  
target 5' AUCAUUAUUUCUUUUUCUUUA 3'  
::: :::::::::::::::::::::  
query 3' UAGGAGUUGAAGAAGAAGAAGU 5'  
query=miR5227, target=R03G\_09720, score=4, range=318-339, strand=  
target 5' GUCCUUGAUUUCUUCUCAUCA 3'  
.::::::::::::::::::: :::  
query 3' UAGGAGUUGAAGAAGAAGAAGU 5'  
query=miR5227, target=R03G\_06767, score=4, range=3225-3246, stran  
target 5' CCUUUAGCUUCUUCUUCUCA 3'  
.....:::::::::::::::::::  
query 3' UAGGAGUUGAAGAAGAAGAAGU 5'  
query=miR5227, target=R03G\_07999, score=4, range=969-990, strand=  
target 5' AUCUUCAGCUUCUUCUCAUCU 3'  
::::::::::: :::  
query 3' UAGGAGUUGAAGAAGAAGAAGU 5'  
query=miR5227, target=R03G\_08632, score=4, range=558-579, strand=  
target 5' AUCCUCAACUUCUCCUCAUCA 3'  
::::::::::: :: :::  
query 3' UAGGAGUUGAAGAAGAAGAAGU 5'  
query=miR5227, target=R03G\_14961, score=4, range=3449-3470, stran  
target 5' AUACUCAACAUCUUCUUCUUUA 3'  
:: ::::::: :::::::::::::::::::::  
query 3' UAGGAGUUGAAGAAGAAGAAGU 5'  
query=miR5227, target=R03G\_00993, score=4, range=612-633, strand=  
target 5' AUCCUCAUCGUUUUCUUCUCA 3'  
::::::::::: : :::::::::::::::::::::  
query 3' UAGGAGUUGAAGAAGAAGAAGU 5'  
query=miR5227, target=R03G\_13237, score=4, range=189-210, strand=  
target 5' GUCCUCGUCUUCUCCUCAUCA 3'  
..... ::::::::::: :::::::  
query 3' UAGGAGUUGAAGAAGAAGAAGU 5'  
query=miR5227, target=R03G\_14289, score=4, range=618-639, strand=  
target 5' AUCGUCAUCUUUUUCUUCUUUA 3'  
::: :: :::::::::::::::::::::  
query 3' UAGGAGUUGAAGAAGAAGAAGU 5'  
query=miR5227, target=R03G\_07647, score=4, range=150-171, strand=  
target 5' AUUUUGAACUUCUUCUUCUCA 3'  
..... ::::::::::::::::::::: ::  
query 3' UAGGAGUUGAAGAAGAAGAAGU 5'  
query=miR5227, target=R03G\_11504, score=4, range=270-291, strand=  
target 5' AGCUUCAGCAUCUUCUUCUCA 3'  
: ::::::: :::::::::::::::::::::  
query 3' UAGGAGUUGAAGAAGAAGAAGU 5'  
query=miR5227, target=R03G\_04929, score=4, range=441-462, strand=

target 5' AUCUUCUUUUUCUUCUUCUUUA 3'  
::::: .:::::  
query 3' UAGGAGUUGAAGAAGAAGAAGU 5'  
query=miR5227, target=R03G\_04852, score=4, range=870-891, strand=  
target 5' AUCUACAGAUUCUUCUUUUUCA 3'  
:::. :: .:::::  
query 3' UAGGAGUUGAAGAAGAAGAAGU 5'  
query=miR5227, target=R03G\_03409, score=4, range=414-435, strand=  
target 5' AUCUUUCUCUUUUUCUUCUUCA 3'  
::::. .:::::  
query 3' UAGGAGUUGAAGAAGAAGAAGU 5'  
query=miR5227, target=R03G\_02335, score=4, range=906-928, strand=  
target 5' AUCUUUCAUUUUUCUUCUUUUUCA 3'  
::: .::: .:::::  
query 3' UAG-GAGUUGAAGAAGAAGAAGU 5'  
query=miR5227, target=R03G\_17101, score=4, range=665-686, strand=  
target 5' UUCAUAAUUUCUUCUUCUUCU 3'  
::: .:::::  
query 3' UAGGAGUUGAAGAAGAAGAAGU 5'  
query=miR5227, target=R03G\_10461, score=4, range=620-641, strand=  
target 5' UUCAUAGCUUCUUCUUCUUCU 3'  
::: .:::::  
query 3' UAGGAGUUGAAGAAGAAGAAGU 5'  
query=miR5227, target=R03G\_16965, score=4, range=2358-2379, stran  
target 5' AUCCUCAUCUUCUUCUUCAUCC 3'  
::::: .:::::  
query 3' UAGGAGUUGAAGAAGAAGAAGU 5'  
query=miR5227, target=R03G\_16470, score=4, range=426-448, strand=  
target 5' GUUGUUCGUCUUCUUCUUCUUCA 3'  
.:. .:: .:::::  
query 3' UAG-GAGUUGAAGAAGAAGAAGU 5'  
query=miR5227, target=R03G\_14853, score=4, range=246-267, strand=  
target 5' UUCUUCGUCUUCUUCUUCUUC 3'  
::::. .:::::  
query 3' UAGGAGUUGAAGAAGAAGAAGU 5'  
query=miR5227, target=R03G\_04484, score=4, range=84-105, strand=-  
target 5' UUCAUCAUCUUCUUCUUCUUCA 3'  
::::: .::: .:::::  
query 3' UAGGAGUUGAAGAAGAAGAAGU 5'  
query=miR5227, target=R03G\_07020, score=4, range=735-756, strand=  
target 5' AUCCUCAUCUUCUUCAUCUUCU 3'  
::::: .:::::  
query 3' UAGGAGUUGAAGAAGAAGAAGU 5'  
query=miR5227, target=R03G\_15353, score=4, range=657-678, strand=  
target 5' CUCCUCAUCCUCUUCUUCUUCA 3'



::::: : ::::::::::::::  
query 3' UAGGAGUUGAAGAAGAAGAAGU 5'  
query=miR5227, target=R03G\_13505, score=4, range=381-402, strand=  
target 5' UUCUCCUCUUCUUCUUCUUCG 3'  
::::: ::::::::::::::  
query 3' UAGGAGUUGAAGAAGAAGAAGU 5'  
query=miR5227, target=R03G\_12517, score=4, range=27-48, strand=-1  
target 5' UCCUCAAGCUCUUCUUCUUCA 3'  
::::: ::::::::::::::  
query 3' UAGGAGUUGAAGAAGAAGAAGU 5'  
query=miR5227, target=R03G\_01798, score=4, range=207-228, strand=  
target 5' ACUCUCGCCUUCUUCUUCUUCU 3'  
: .::::. ::::::::::::::  
query 3' UAGGAGUUGAAGAAGAAGAAGU 5'  
query=miR5227, target=R03G\_14420, score=4, range=1773-1794, stran  
target 5' UUCUUCUUCUUCUUCUUCUUCG 3'  
::::: ::::::::::::::  
query 3' UAGGAGUUGAAGAAGAAGAAGU 5'  
query=miR5227, target=R03G\_13513, score=4, range=1503-1524, stran  
target 5' UUCUUCUUCUUCUUCUUCUUCG 3'  
::::: ::::::::::::::  
query 3' UAGGAGUUGAAGAAGAAGAAGU 5'  
query=miR5227, target=R03G\_00845, score=4, range=1437-1458, stran  
target 5' GCCUCCACUUCUUCUUCUUC 3'  
. .::::. ::::::::::::::  
query 3' UAGGAGUUGAAGAAGAAGAAGU 5'  
query=miR5227, target=R03G\_08989, score=4, range=1746-1767, stran  
target 5' AAUUUCACCUUCUUCUUCUUCU 3'  
: .::::. ::::::::::::::  
query 3' UAGGAGUUGAAGAAGAAGAAGU 5'  
query=miR5227, target=R03G\_12945, score=4, range=72-93, strand=-1  
target 5' UUCUUCUUCUUCUUCUUCUUCG 3'  
::::: ::::::::::::::  
query 3' UAGGAGUUGAAGAAGAAGAAGU 5'  
query=miR5227, target=R03G\_02556, score=4, range=3054-3075, stran  
target 5' AUCAUCAAAUUCUUCUUCUCA 3'  
::: ::: :::::::::::::: :::  
query 3' UAGGAGUUGAAGAAGAAGAAGU 5'  
query=miR5227, target=R03G\_03969, score=4, range=600-621, strand=  
target 5' AUCCGCGCUUCUUCUUCUUC 3'  
::::: . . ::::::::::::::  
query 3' UAGGAGUUGAAGAAGAAGAAGU 5'  
query=miR5227, target=R03G\_10712, score=4, range=1143-1164, stran  
target 5' UUCUUCUUCUUCUUCUUCUUCG 3'  
::::: ::::::::::::::



query=miR5227, target=R03G\_12131, score=4, range=1437-1458, stran  
target 5' AUCAUCAUCCUCUUCUUCUUCA 3'  
::: ::: : :::::::::::::::  
query 3' UAGGAGUUGAAGAAGAAGAAGU 5'  
query=miR5227, target=R03G\_03957, score=4, range=1284-1305, stran  
target 5' AUCAUCAUCCUCUUCUUCUUCA 3'  
::: ::: : :::::::::::::::  
query 3' UAGGAGUUGAAGAAGAAGAAGU 5'  
query=miR5227, target=R03G\_15686, score=4, range=720-741, strand=  
target 5' AUCAUCAUCUUCUUCUUCAUCA 3'  
::: ::: ::::::::::::::: :::  
query 3' UAGGAGUUGAAGAAGAAGAAGU 5'  
query=miR5227, target=R03G\_11890, score=4, range=111-132, strand=  
target 5' AUCUUUUAAUUCUUCUUCUUC 3'  
::::: . : :::::::::::::::  
query 3' UAGGAGUUGAAGAAGAAGAAGU 5'  
query=miR5227, target=R03G\_13255, score=4, range=195-217, strand=  
target 5' CUCCUUGUUCUUCUUCUUCUUCA 3'  
::::: . :::::::::::::::  
query 3' UAGGAGU-UGAAGAAGAAGAAGU 5'  
query=miR5227, target=R03G\_02114, score=4, range=459-480, strand=  
target 5' AUCAUCAUCUUCUUCUUCUCA 3'  
::: ::: ::::::::::::::: :::  
query 3' UAGGAGUUGAAGAAGAAGAAGU 5'  
query=miR5227, target=R03G\_01368, score=4, range=633-654, strand=  
target 5' CUCAUCAAAUUCUUCUUCUUC 3'  
:: :::: :::::::::::::::  
query 3' UAGGAGUUGAAGAAGAAGAAGU 5'  
query=miR5227, target=R03G\_06704, score=4, range=171-192, strand=  
target 5' AUCAUCAUCGUCUUCUUCUUCA 3'  
::: ::: : :::::::::::::::  
query 3' UAGGAGUUGAAGAAGAAGAAGU 5'  
query=miR5227, target=R03G\_09755, score=4, range=2232-2253, stran  
target 5' UUCUCUUCUUCUUCUUCUUCU 3'  
::::: :::::::::::::::  
query 3' UAGGAGUUGAAGAAGAAGAAGU 5'  
query=miR5227, target=R03G\_16240, score=4, range=390-411, strand=  
target 5' AUCGUCACCUUCUUCUUCAUCA 3'  
::: ::: ::::::::::::::: :::  
query 3' UAGGAGUUGAAGAAGAAGAAGU 5'  
query=miR5227, target=R03G\_02991, score=4, range=135-156, strand=  
target 5' UUCUCUUCUUCUUCUUCUUC 3'  
::::: :::::::::::::::  
query 3' UAGGAGUUGAAGAAGAAGAAGU 5'  
query=miR5227, target=R03G\_05313, score=4, range=1230-1251, stran







query=miR823-5p, target=R03G\_11406, score=4, range=835-856, stran  
target 5' AAUGAUCAGUGAUCAGGACAAA 3'  
:::: ::::::::::: :::::  
query 3' UUACCAGUCACUAGUUAUGUUU 5'  
query=miR823-5p, target=R03G\_06563, score=4, range=2527-2547,  
strand=-1  
target 5' CAUGG-CAGUGAUUAAUGCAA 3'  
:::: ::::::::::: :::::  
query 3' UUACCAGUCACUAGUUAUGUUU 5'  
query=miR823-5p, target=R03G\_06887, score=4, range=1619-1639,  
strand=-1  
target 5' AAUGG-CAGUUAUCAAUACGAA 3'  
:::: :::: ::::::::::: :::::  
query 3' UUACCAGUCACUAGUUAUGUUU 5'  
query=miR2644, target=R03G\_06059, score=2.5, range=999-1018, stra  
target 5' ACAUCAUCAACUGAAGAAA 3'  
::::: ::::::::::: ::::: :  
query 3' UGUUGGUAGUUGACUUCUCU 5'  
query=miR2644, target=R03G\_13025, score=2.5, range=2013-2033, str  
target 5' ACAGUCCAUCAACUGGAGAGA 3'  
:::: ::::::::::: ::::::::::: :::::  
query 3' UGUU-GGUAGUUGACUUCUCU 5'  
query=miR2644, target=R03G\_00272, score=3, range=5285-5305, stran  
target 5' ACACACCAUCAACUGAAGGGC 3'  
::: ::::::::::: ::::::::::: :::::  
query 3' UGU-UGGUAGUUGACUUCUCU 5'  
query=miR2644, target=R03G\_10744, score=3.5, range=360-378, stran  
target 5' GCUAUC-UCAACUGAAGAGG 3'  
. : . : ::::::::::: :::::  
query 3' UGUUGGUAGUUGACUUCUCU 5'  
query=miR2644, target=R03G\_16366, score=3.5, range=360-378, stran  
target 5' GCUAUC-UCAACUGAAGAGG 3'  
. : . : ::::::::::: :::::  
query 3' UGUUGGUAGUUGACUUCUCU 5'  
query=miR2644, target=R03G\_13448, score=3.5, range=360-378, stran  
target 5' GCUAUC-UCAACUGAAGAGG 3'  
. : . : ::::::::::: :::::  
query 3' UGUUGGUAGUUGACUUCUCU 5'  
query=miR2644, target=R03G\_17253, score=3.5, range=360-378, stran  
target 5' GCUAUC-UCAACUGAAGAGG 3'  
. : . : ::::::::::: :::::  
query 3' UGUUGGUAGUUGACUUCUCU 5'  
query=miR2644, target=R03G\_17200, score=3.5, range=474-492, stran  
target 5' GCUAUC-UCAACUGAAGAGG 3'  
. : . : ::::::::::: :::::





query 3' GACUUGUCACCAUGCUGAUUGU 5'  
query=miR416, target=R03G\_05431, score=0, range=90-111, strand=-1  
target 5' CUGAACAGUGGUACGACUAACA 3'

query 3' GACUUGUCACCAUGCUGAUUGU 5'  
query=miR416, target=R03G\_02822, score=0, range=90-111, strand=-1  
target 5' CUGAACAGUGGUACGACUAACA 3'

query 3' GACUUGUCACCAUGCUGAUUGU 5'  
query=miR416, target=R03G\_15141, score=0, range=90-111, strand=-1  
target 5' CUGAACAGUGGUACGACUAACA 3'

query 3' GACUUGUCACCAUGCUGAUUGU 5'  
query=miR416, target=R03G\_09168, score=0, range=90-111, strand=-1  
target 5' CUGAACAGUGGUACGACUAACA 3'

query 3' GACUUGUCACCAUGCUGAUUGU 5'  
query=miR416, target=R03G\_04787, score=0, range=90-111, strand=-1  
target 5' CUGAACAGUGGUACGACUAACA 3'

query 3' GACUUGUCACCAUGCUGAUUGU 5'  
query=miR416, target=R03G\_00304, score=1, range=90-111, strand=-1  
target 5' CUGAACAGUGGUACGACUAAUA 3'

query 3' GACUUGUCACCAUGCUGAUUGU 5'  
query=miR416, target=R03G\_12954, score=1, range=90-111, strand=-1  
target 5' CUGGACAGUGGUACGACUAACG 3'

query 3' GACUUGUCACCAUGCUGAUUGU 5'  
query=miR416, target=R03G\_10770, score=1, range=90-111, strand=-1  
target 5' CUGGACAGUGGUACGACUAACG 3'

query 3' GACUUGUCACCAUGCUGAUUGU 5'  
query=miR416, target=R03G\_10762, score=1, range=90-111, strand=-1  
target 5' CUGGACAGUGGUACGACUAACG 3'

query 3' GACUUGUCACCAUGCUGAUUGU 5'  
query=miR1917, target=R03G\_19001, score=0, range=672-690, strand=  
target 5' ACUUUAGACCUUGAUCAAU 3'

query 3' UGAAAUCUGGAACUAGUUA 5'  
query=miR1917, target=R03G\_19004, score=0, range=968-986, strand=  
target 5' ACUUUAGACCUUGAUCAAU 3'

query 3' UGAAAUCUGGAACUAGUUA 5'  
query=miR1917, target=R03G\_10315, score=2, range=1853-1870, stran  
target 5' ACUUU-GACUUUGAUCAAU 3'  
.....

query 3' UGAAAUCUGGAACUAGUUA 5'  
query=miR1917, target=R03G\_08884, score=2, range=2014-2031, stran  
target 5' ACUUU-GACUUUGAUCAAU 3'  
.....

query 3' UGAAAUCUGGAACUAGUUA 5'  
query=miR1917, target=R03G\_00502, score=2.5, range=244-261, stran  
target 5' AC-UUGGACCUUGAUCGAU 3'  
:: .....

query 3' UGAAAUCUGGAACUAGUUA 5'  
query=miR1917, target=R03G\_05691, score=3, range=448-466, strand=  
target 5' CUUUUGGACCUUGGUCAAU 3'  
.....

query 3' UGAAAUCUGGAACUAGUUA 5'  
query=miR1917, target=R03G\_10277, score=3, range=1653-1671, stran  
target 5' ACCUUUGACCUUGAUCAAG 3'  
:: :: .....

query 3' UGAAAUCUGGAACUAGUUA 5'  
query=miR1917, target=R03G\_03637, score=3, range=525-542, strand=  
target 5' CCUUU-GACCUUGAUCAAC 3'  
:::: .....

query 3' UGAAAUCUGGAACUAGUUA 5'  
query=miR1917, target=R03G\_01687, score=3.5, range=213-231, stran  
target 5' GCUUUUGAUCUUGAUUAAU 3'  
.....

query 3' UGAAAUCUGGAACUAGUUA 5'  
query=miR1917, target=R03G\_16595, score=3.5, range=792-810, stran  
target 5' GCUUCAGACCUUGAUCGAG 3'  
.....

query 3' UGAAAUCUGGAACUAGUUA 5'  
query=miR1917, target=R03G\_02854, score=3.5, range=871-889, stran  
target 5' AUUGUAGACGUUGAUCAAU 3'  
::: .....

query 3' UGAAAUCUGGAACUAGUUA 5'  
query=miR1917, target=R03G\_12510, score=3.5, range=1126-1143, str  
target 5' CUUUUAGACCUUGA-CAAU 3'  
.....

query 3' UGAAAUCUGGAACUAGUUA 5'  
query=miR1917, target=R03G\_16647, score=3.5, range=265-283, stran  
target 5' AUUUAUGACCUUGAUCAAC 3'  
:::: .....

query 3' UGAAAUCUGGAACUAGUUA 5'

query=miR1917, target=R03G\_15094, score=3.5, range=700-717, stran  
target 5' GCUUCA-ACCUUGAUCAAU 3'  
.:::: : :::::::::::::::  
query 3' UGAAAUCUGGAACUAGUUA 5'  
query=miR1917, target=R03G\_16435, score=3.5, range=300-318, stran  
target 5' AUUGUAGACCUUGAACAAU 3'  
::: :::::::::::::: :::::  
query 3' UGAAAUCUGGAACUAGUUA 5'  
query=miR1917, target=R03G\_14576, score=3.5, range=360-377, stran  
target 5' GCUUUCG-CCUUGAUCAAU 3'  
.::::: : :::::::::::::::  
query 3' UGAAAUCUGGAACUAGUUA 5'  
query=miR1917, target=R03G\_00267, score=3.5, range=1092-1110,  
strand=-1  
target 5' AUACAAGACCUUGAUCAAU 3'  
:. :::::::::::::::  
query 3' UGAAAUCUGGAACUAGUUA 5'  
query=miR1917, target=R03G\_10615, score=4, range=297-315, strand=  
target 5' ACUUCACAUCUUGAUCAAU 3'  
::::: : :::::::::::::::  
query 3' UGAAAUCUGGAACUAGUUA 5'  
query=miR1917, target=R03G\_11623, score=4, range=309-327, strand=  
target 5' ACCUUUGGCUUUGAUCAAU 3'  
:: : : :::::::::::::::  
query 3' UGAAAUCUGGAACUAGUUA 5'  
query=miR1917, target=R03G\_11551, score=4, range=483-501, strand=  
target 5' ACCUCAGACCUUGAUCGGU 3'  
:: : :::::::::::::::  
query 3' UGAAAUCUGGAACUAGUUA 5'  
query=miR1917, target=R03G\_11168, score=4, range=732-750, strand=  
target 5' CCUUUUGACCUGGAUCAAU 3'  
::::: ::::::: :::::::  
query 3' UGAAAUCUGGAACUAGUUA 5'  
query=miR1917, target=R03G\_11391, score=4, range=658-675, strand=  
target 5' ACUUUAGUCCUUGAU-AAU 3'  
::::: ::::::: ::::  
query 3' UGAAAUCUGGAACUAGUUA 5'  
query=miR1917, target=R03G\_04899, score=4, range=412-429, strand=  
target 5' ACUUU-GACAUUGAUCGAU 3'  
::::: :::: ::::::: ::::  
query 3' UGAAAUCUGGAACUAGUUA 5'  
query=miR1917, target=R03G\_03500, score=4, range=406-423, strand=  
target 5' ACCUU-GACCUUGGUCGAU 3'  
:: : : :::::::::::::::  
query 3' UGAAAUCUGGAACUAGUUA 5'

query=miR1917, target=R03G\_09571, score=4, range=1101-1119, stran  
target 5' ACUACAGACAUUGAUCAAU 3'  
::: :::: :  
query 3' UGAAAUCUGGAACUAGUUA 5'  
query=miR1917, target=R03G\_05825, score=4, range=499-516, strand=  
target 5' ACUCAAG-CCUUGAUCAAU 3'  
::: :: :  
query 3' UGAAAUCUGGAACUAGUUA 5'  
query=miR1917, target=R03G\_07626, score=4, range=106-123, strand=  
target 5' ACCUU-GACCUUGACCAAU 3'  
:: :: :  
query 3' UGAAAUCUGGAACUAGUUA 5'  
query=miR1917, target=R03G\_17338, score=4, range=1652-1671, stran  
target 5' GUUUUCGACCAUUGAUCAAU 3'  
..... :  
query 3' UGAAAUCUGG-AACUAGUUA 5'  
query=miR1917, target=R03G\_01807, score=4, range=6547-6566, stran  
target 5' GUUUUAAGAUCUUGGUCAAU 3'  
..... :  
query 3' UGAAA-UCUGGAACUAGUUA 5'  
query=miR1917, target=R03G\_10464, score=4, range=1720-1738, stran  
target 5' AUUGUGGGCCUUGAUCAAC 3'  
::: ..... :  
query 3' UGAAAUCUGGAACUAGUUA 5'  
query=miR1917, target=R03G\_14229, score=4, range=4072-4089, stran  
target 5' AUUUUGGACUUUG-UCAAU 3'  
..... :  
query 3' UGAAAUCUGGAACUAGUUA 5'  
query=miR1917, target=R03G\_06482, score=4, range=193-210, strand=  
target 5' GUUUU-GACAUUGAUCAAU 3'  
..... :  
query 3' UGAAAUCUGGAACUAGUUA 5'  
query=miR1917, target=R03G\_11579, score=4, range=403-421, strand=  
target 5' AGUACAGACCUUGAUCAAA 3'  
: : :  
query 3' UGAAAUCUGGAACUAGUUA 5'  
query=miR1917, target=R03G\_01176, score=4, range=4905-4923, stran  
target 5' ACCGAUGACCUUGAUCAAU 3'  
:: :  
query 3' UGAAAUCUGGAACUAGUUA 5'  
query=miR1917, target=R03G\_05885, score=4, range=1773-1791, stran  
target 5' ACCCUUGACCUUGAUCAAG 3'  
:: : :  
query 3' UGAAAUCUGGAACUAGUUA 5'  
query=miR1917, target=R03G\_04352, score=4, range=1453-1470, stran

target 5' ACCUU-CACCUUGAUCAAU 3'  
:: :: ::::::::::::::  
query 3' UGAAAUCUGGAACUAGUUA 5'  
query=miR1917, target=R03G\_04057, score=4, range=633-650, strand=  
target 5' UCUUUAGG-CUUGAUCAAU 3'  
:.....: ::::::::::::::  
query 3' UGAAAUCUGGAACUAGUUA 5'  
query=miR1857-5p, target=R03G\_17462, score=1, range=165-185, stra  
target 5' CCGCAUCGCCAAAAGAAUCCA 3'  
:.....: ::::::::::::::  
query 3' GGCGUAGAGGUUUUCUUAGGU 5'  
query=miR1857-5p, target=R03G\_05618, score=1, range=27-47, strand  
target 5' CCGCAUCGCCAAAAGAAUCCA 3'  
:.....: ::::::::::::::  
query 3' GGCGUAGAGGUUUUCUUAGGU 5'  
query=miR1857-5p, target=R03G\_03751, score=1, range=27-47, strand  
target 5' CCGCAUCGCCAAAAGAAUCCA 3'  
:.....: ::::::::::::::  
query 3' GGCGUAGAGGUUUUCUUAGGU 5'  
query=miR1857-5p, target=R03G\_14280, score=3, range=29-49, strand  
target 5' CUGCAAUUUCAAAAAGAAUCCA 3'  
:....: .:.....: ::::::::::::::  
query 3' GGCGUAGAGGUUUUCUUAGGU 5'  
query=miR1857-5p, target=R03G\_07567, score=3, range=2240-2260,  
strand=-1  
target 5' CCGCAUAUCCAAAAGAAUCAA 3'  
:.....: :::::::::::::: :  
query 3' GGCGUAGAGGUUUUCUUAGGU 5'  
query=miR1857-5p, target=R03G\_00874, score=3, range=978-997, stra  
target 5' CUUCGUC-CCAAAAGAAUCCA 3'  
:. :...: ::::::::::::::  
query 3' GGCGUAGAGGUUUUCUUAGGU 5'  
query=miR1857-5p, target=R03G\_02342, score=4, range=2118-2137,  
strand=1  
target 5' UCGUAU-UCCAAAACAAUCCA 3'  
:....: :.....: :.....:  
query 3' GGCGUAGAGGUUUUCUUAGGU 5'  
query=miR1857-5p, target=R03G\_07329, score=4, range=387-406, stra  
target 5' UCGC-UCCUAAAAGAAUCCG 3'  
:....: :: :.....: :.....:  
query 3' GGCGUAGAGGUUUUCUUAGGU 5'  
query=miR1857-5p, target=R03G\_11250, score=4, range=200-220, stra  
target 5' GCGCAUCACCAAAGGAAUUCA 3'  
:.....: :.....: :.....:  
query 3' GGCGUAGAGGUUUUCUUAGGU 5'



target 5' UCUUCUGCGCCACUUCUUCAUCA 3'  
:  
query 3' AGAAGACGCGGUGAAGAAGUAGU 5'  
query=miR5293, target=R03G\_16361, score=0, range=2824-2846, stran  
target 5' UCUUCUGCGCCACUUCUUCAUCA 3'  
:  
query 3' AGAAGACGCGGUGAAGAAGUAGU 5'  
query=miR5293, target=R03G\_06425, score=0, range=2824-2846, stran  
target 5' UCUUCUGCGCCACUUCUUCAUCA 3'  
:  
query 3' AGAAGACGCGGUGAAGAAGUAGU 5'  
query=miR5293, target=R03G\_05330, score=0, range=2824-2846, stran  
target 5' UCUUCUGCGCCACUUCUUCAUCA 3'  
:  
query 3' AGAAGACGCGGUGAAGAAGUAGU 5'  
query=miR5293, target=R03G\_02704, score=0, range=2824-2846, stran  
target 5' UCUUCUGCGCCACUUCUUCAUCA 3'  
:  
query 3' AGAAGACGCGGUGAAGAAGUAGU 5'  
query=miR5293, target=R03G\_12677, score=0, range=2824-2846, stran  
target 5' UCUUCUGCGCCACUUCUUCAUCA 3'  
:  
query 3' AGAAGACGCGGUGAAGAAGUAGU 5'  
query=miR5293, target=R03G\_17021, score=0, range=2824-2846, stran  
target 5' UCUUCUGCGCCACUUCUUCAUCA 3'  
:  
query 3' AGAAGACGCGGUGAAGAAGUAGU 5'  
query=miR5293, target=R03G\_04933, score=0, range=2824-2846, stran  
target 5' UCUUCUGCGCCACUUCUUCAUCA 3'  
:  
query 3' AGAAGACGCGGUGAAGAAGUAGU 5'  
query=miR5293, target=R03G\_04126, score=0, range=2983-3005, stran  
target 5' UCUUCUGCGCCACUUCUUCAUCA 3'  
:  
query 3' AGAAGACGCGGUGAAGAAGUAGU 5'  
query=miR5293, target=R03G\_05344, score=0, range=2650-2672, stran  
target 5' UCUUCUGCGCCACUUCUUCAUCA 3'  
:  
query 3' AGAAGACGCGGUGAAGAAGUAGU 5'  
query=miR5293, target=R03G\_03778, score=0, range=2782-2804, stran  
target 5' UCUUCUGCGCCACUUCUUCAUCA 3'  
:  
query 3' AGAAGACGCGGUGAAGAAGUAGU 5'  
query=miR5293, target=R03G\_12673, score=0, range=2125-2147, stran  
target 5' UCUUCUGCGCCACUUCUUCAUCA 3'

query 3' AGAAGACGCGGUGAAGAAGUAGU 5'  
query=miR5293, target=R03G\_17422, score=0, range=2125-2147, stran  
target 5' UCUUCUGCGCCACUUCUUCAUCA 3'

query 3' AGAAGACGCGGUGAAGAAGUAGU 5'  
query=miR5293, target=R03G\_12532, score=0, range=2830-2852, stran  
target 5' UCUUCUGCGCCACUUCUUCAUCA 3'

query 3' AGAAGACGCGGUGAAGAAGUAGU 5'  
query=miR5293, target=R03G\_01936, score=0, range=2830-2852, stran  
target 5' UCUUCUGCGCCACUUCUUCAUCA 3'

query 3' AGAAGACGCGGUGAAGAAGUAGU 5'  
query=miR5293, target=R03G\_03619, score=0, range=2716-2738, stran  
target 5' UCUUCUGCGCCACUUCUUCAUCA 3'

query 3' AGAAGACGCGGUGAAGAAGUAGU 5'  
query=miR5293, target=R03G\_09493, score=0, range=1648-1670, stran  
target 5' UCUUCUGCGCCACUUCUUCAUCA 3'

query 3' AGAAGACGCGGUGAAGAAGUAGU 5'  
query=miR5293, target=R03G\_02821, score=0, range=2989-3011, stran  
target 5' UCUUCUGCGCCACUUCUUCAUCA 3'

query 3' AGAAGACGCGGUGAAGAAGUAGU 5'  
query=miR5293, target=R03G\_05515, score=0, range=1819-1841, stran  
target 5' UCUUCUGCGCCACUUCUUCAUCA 3'

query 3' AGAAGACGCGGUGAAGAAGUAGU 5'  
query=miR5293, target=R03G\_00241, score=0, range=1114-1136, stran  
target 5' UCUUCUGCGCCACUUCUUCAUCA 3'

query 3' AGAAGACGCGGUGAAGAAGUAGU 5'  
query=miR5293, target=R03G\_00296, score=0, range=1114-1136, stran  
target 5' UCUUCUGCGCCACUUCUUCAUCA 3'

query 3' AGAAGACGCGGUGAAGAAGUAGU 5'  
query=miR5293, target=R03G\_03769, score=0, range=754-776, strand=  
target 5' UCUUCUGCGCCACUUCUUCAUCA 3'

query 3' AGAAGACGCGGUGAAGAAGUAGU 5'  
query=miR5293, target=R03G\_01964, score=0, range=1300-1322, stran  
target 5' UCUUCUGCGCCACUUCUUCAUCA 3'





query 3' CACGAGAGAUAGCAGCAAGU 5'  
query=miR535d, target=R03G\_13174, score=4, range=20-39, strand=1  
target 5' AUGAACUUUAUCGUCGUUCA 3'  
:: ::::::::::::::::::::

query 3' CACGAGAGAUAGCAGCAAGU 5'  
query=miR535d, target=R03G\_09252, score=4, range=443-462, strand=  
target 5' AUUCUAUCUAUCGUCGUUCU 3'  
: :: ::::::::::::::::::::

query 3' CACGAGAGAUAGCAGCAAGU 5'  
query=miR535d, target=R03G\_14251, score=4, range=422-440, strand=  
target 5' GU-CUAUCUAUCCUCGUUCA 3'  
:: :: :::::::::: ::::::::::

query 3' CACGAGAGAUAGCAGCAAGU 5'  
query=miR1513a-5p, target=R03G\_09180, score=0, range=1667-1687,  
strand=1  
target 5' GCAAGUCCAUGGCUUUGUUCA 3'  
::::::::::::::::::::::::::

query 3' CGUUCAGGUACCGAAACAAGU 5'  
query=miR1513a-5p, target=R03G\_16812, score=0, range=1667-1687,  
strand=1  
target 5' GCAAGUCCAUGGCUUUGUUCA 3'  
::::::::::::::::::::::::::

query 3' CGUUCAGGUACCGAAACAAGU 5'  
query=miR1513a-5p, target=R03G\_09189, score=0, range=1667-1687,  
strand=1  
target 5' GCAAGUCCAUGGCUUUGUUCA 3'  
::::::::::::::::::::::::::

query 3' CGUUCAGGUACCGAAACAAGU 5'  
query=miR1513a-5p, target=R03G\_14798, score=0, range=1667-1687,  
strand=1  
target 5' GCAAGUCCAUGGCUUUGUUCA 3'  
::::::::::::::::::::::::::

query 3' CGUUCAGGUACCGAAACAAGU 5'  
query=miR1513a-5p, target=R03G\_14791, score=0, range=1667-1687,  
strand=1  
target 5' GCAAGUCCAUGGCUUUGUUCA 3'  
::::::::::::::::::::::::::

query 3' CGUUCAGGUACCGAAACAAGU 5'  
query=miR1513a-5p, target=R03G\_15270, score=0, range=716-736, str  
target 5' GCAAGUCCAUGGCUUUGUUCA 3'  
::::::::::::::::::::::::::

query 3' CGUUCAGGUACCGAAACAAGU 5'  
query=miR1513a-5p, target=R03G\_16392, score=0, range=650-670, str  
target 5' GCAAGUCCAUGGCUUUGUUCA 3'  
::::::::::::::::::::::::::



query=miR1513a-5p, target=R03G\_15875, score=3.5, range=1670-1690,  
strand=1  
target 5' GCAAUUCGAUGGCUUUGUUUG 3'  
:::: :: ::::::::::::::..  
query 3' CGUUCAGGUACCGAAACAAGU 5'  
query=miR1513a-5p, target=R03G\_14787, score=3.5, range=1670-1690,  
strand=1  
target 5' GCAAUUCGAUGGCUUUGUUUG 3'  
:::: :: ::::::::::::::..  
query 3' CGUUCAGGUACCGAAACAAGU 5'  
query=miR1513a-5p, target=R03G\_17411, score=3.5, range=1112-1132,  
strand=1  
target 5' GCAAUUCGAUGGCUUUGUUUG 3'  
:::: :: ::::::::::::::..  
query 3' CGUUCAGGUACCGAAACAAGU 5'  
query=miR1513a-5p, target=R03G\_03072, score=3.5, range=465-485,  
strand=1  
target 5' GAAAGGAUAUGGCUUUGUUCA 3'  
: ::: .:::::::::::::  
query 3' CGUUCAGGUACCGAAACAAGU 5'  
query=miR1513a-5p, target=R03G\_06449, score=4, range=3435-3454,  
strand=-1  
target 5' GUGA-UCCAAGGCUUUGUUCA 3'  
:..: :::: :::::::::::::::  
query 3' CGUUCAGGUACCGAAACAAGU 5'  
query=miR1513a-5p, target=R03G\_16135, score=4, range=267-286,  
strand=-1  
target 5' GCAAUCAAUGGCUUUG-UCA 3'  
:::: :: :::::::::::::: :::  
query 3' CGUUCAGGUACCGAAACAAGU 5'  
query=miR1513a-5p, target=R03G\_01941, score=4, range=267-286,  
strand=-1  
target 5' GCAAUCAAUGGCUUUG-UCA 3'  
:::: :: :::::::::::::: :::  
query 3' CGUUCAGGUACCGAAACAAGU 5'  
query=miR1513a-5p, target=R03G\_09956, score=4, range=267-286,  
strand=-1  
target 5' GCAAUCAAUGGCUUUG-UCA 3'  
:::: :: :::::::::::::: :::  
query 3' CGUUCAGGUACCGAAACAAGU 5'  
query=miR1513a-5p, target=R03G\_03105, score=4, range=267-286,  
strand=-1  
target 5' GCAAUCAAUGGCUUUG-UCA 3'  
:::: :: :::::::::::::: :::  
query 3' CGUUCAGGUACCGAAACAAGU 5'

query=miR1513a-5p, target=R03G\_10523, score=4, range=267-286,  
strand=-1  
target 5' GCAAUCAAUGGCUUUG-UCA 3'  
:::: :: ::::::::::: :::  
query 3' CGUUCAGGUACCGAAACAAGU 5'  
query=miR1513a-5p, target=R03G\_15285, score=4, range=267-286,  
strand=-1  
target 5' GCAAUCAAUGGCUUUG-UCA 3'  
:::: :: ::::::::::: :::  
query 3' CGUUCAGGUACCGAAACAAGU 5'  
query=miR1513a-5p, target=R03G\_04217, score=4, range=267-286,  
strand=-1  
target 5' GCAAUCAAUGGCUUUG-UCA 3'  
:::: :: ::::::::::: :::  
query 3' CGUUCAGGUACCGAAACAAGU 5'  
query=miR1513a-5p, target=R03G\_07679, score=4, range=36-55, stran  
target 5' GCAAUCAAUGGCUUUG-UCA 3'  
:::: :: ::::::::::: :::  
query 3' CGUUCAGGUACCGAAACAAGU 5'  
query=miR1513a-5p, target=R03G\_09932, score=4, range=267-286,  
strand=-1  
target 5' GCAAUCAAUGGCUUUG-UCA 3'  
:::: :: ::::::::::: :::  
query 3' CGUUCAGGUACCGAAACAAGU 5'  
query=miR1513a-5p, target=R03G\_11770, score=4, range=267-286,  
strand=-1  
target 5' GCAAUCAAUGGCUUUG-UCA 3'  
:::: :: ::::::::::: :::  
query 3' CGUUCAGGUACCGAAACAAGU 5'  
query=miR1167, target=R03G\_04690, score=2, range=406-427, strand=  
target 5' GUUCCAGUCAUCCACAGUCCA 3'  
::::: :::::::::::::::  
query 3' CAAAGUUCAGUAGGUGUCGGGU 5'  
query=miR1167, target=R03G\_16729, score=2, range=274-295, strand=  
target 5' GUUCCAGUCAUCCACAGUCCA 3'  
::::: :::::::::::::::  
query 3' CAAAGUUCAGUAGGUGUCGGGU 5'  
query=miR1167, target=R03G\_14560, score=2, range=274-295, strand=  
target 5' GUUCCAGUCAUCCACAGUCCA 3'  
::::: :::::::::::::::  
query 3' CAAAGUUCAGUAGGUGUCGGGU 5'  
query=miR1167, target=R03G\_15141, score=2, range=406-427, strand=  
target 5' GUUCCAGUCAUCCACAGUCCA 3'  
::::: :::::::::::::::  
query 3' CAAAGUUCAGUAGGUGUCGGGU 5'

query=miR1167, target=R03G\_02822, score=2, range=406-427, strand=  
target 5' GUUUCAGUCAUCCACAGUCCA 3'  
::::: ::::::::::::::::::::  
query 3' CAAAGUUCAGUAGGUGUCGGGU 5'  
query=miR1167, target=R03G\_02713, score=2, range=136-157, strand=  
target 5' GUUUCAGUCAUCCACAGUCCA 3'  
::::: ::::::::::::::::::::  
query 3' CAAAGUUCAGUAGGUGUCGGGU 5'  
query=miR1167, target=R03G\_08115, score=2, range=136-157, strand=  
target 5' GUUUCAGUCAUCCACAGUCCA 3'  
::::: ::::::::::::::::::::  
query 3' CAAAGUUCAGUAGGUGUCGGGU 5'  
query=miR1167, target=R03G\_05421, score=2, range=154-175, strand=  
target 5' GUUUCAGUCAUCCACAGUCCA 3'  
::::: ::::::::::::::::::::  
query 3' CAAAGUUCAGUAGGUGUCGGGU 5'  
query=miR1167, target=R03G\_00304, score=2, range=406-427, strand=  
target 5' GUUUCAGUCAUCCACAGUCCA 3'  
::::: ::::::::::::::::::::  
query 3' CAAAGUUCAGUAGGUGUCGGGU 5'  
query=miR1167, target=R03G\_05431, score=3, range=406-427, strand=  
target 5' GUUUCAGUCGUCCACAGUCCA 3'  
::::: ::::::::::::::::::::  
query 3' CAAAGUUCAGUAGGUGUCGGGU 5'  
query=miR1167, target=R03G\_07112, score=3, range=229-250, strand=  
target 5' GUUUCAGUCAUCUACAGUCCA 3'  
::::: ::::::::::::::::::::  
query 3' CAAAGUUCAGUAGGUGUCGGGU 5'  
query=miR1167, target=R03G\_12666, score=3, range=37-58, strand=-1  
target 5' GUUUCAGUCGUCCACAGUCCA 3'  
::::: ::::::::::::::::::::  
query 3' CAAAGUUCAGUAGGUGUCGGGU 5'  
query=miR1167, target=R03G\_09168, score=3, range=406-427, strand=  
target 5' GUUUCAGUCGUCCAUAGCCCA 3'  
::::: ::::::::::::::::::::  
query 3' CAAAGUUCAGUAGGUGUCGGGU 5'  
query=miR1167, target=R03G\_10762, score=3, range=406-427, strand=  
target 5' GUUUCAGUCGUCCAUAGCCCA 3'  
::::: ::::::::::::::::::::  
query 3' CAAAGUUCAGUAGGUGUCGGGU 5'  
query=miR1167, target=R03G\_10770, score=3, range=406-427, strand=  
target 5' GUUUCAGUCGUCCAUAGCCCA 3'  
::::: ::::::::::::::::::::  
query 3' CAAAGUUCAGUAGGUGUCGGGU 5'  
query=miR1167, target=R03G\_08663, score=3, range=406-427, strand=



query 3' CAAAGUUCAGUAGGUGUCGGGU 5'  
query=miR1167, target=R03G\_10529, score=3, range=37-58, strand=-1  
target 5' GUUUCAGUCGUCCACAGUCCA 3'

query 3' CAAAGUUCAGUAGGUGUCGGGU 5'  
query=miR1167, target=R03G\_01948, score=3, range=184-205, strand=  
target 5' GUUUCAGUCAUCUACAGUCCA 3'

query 3' CAAAGUUCAGUAGGUGUCGGGU 5'  
query=miR1167, target=R03G\_05350, score=3.5, range=274-295, stran  
target 5' GUUUCAGUCGUCCACAGUCCG 3'

query 3' CAAAGUUCAGUAGGUGUCGGGU 5'  
query=miR1167, target=R03G\_12588, score=3.5, range=1185-1205,  
strand=-1  
target 5' GAUUCAA-ACAUCCACAGCCCG 3'

query 3' CAAAGUUCAGUAGGUGUCGGGU 5'  
query=miR1167, target=R03G\_15287, score=4, range=184-205, strand=  
target 5' GUUUCAGUCAUCUAUAGUCCA 3'

query 3' CAAAGUUCAGUAGGUGUCGGGU 5'  
query=miR1167, target=R03G\_16359, score=4, range=406-427, strand=  
target 5' GUUUCAGUCAUCUAUAGUCCA 3'

query 3' CAAAGUUCAGUAGGUGUCGGGU 5'  
query=miR1167, target=R03G\_09612, score=4, range=406-427, strand=  
target 5' GUUUCAGUCAUCUAUAGUCCA 3'

query 3' CAAAGUUCAGUAGGUGUCGGGU 5'  
query=miR1167, target=R03G\_07688, score=4, range=406-427, strand=  
target 5' GUUUCAGUCAUCUAUAGUCCA 3'

query 3' CAAAGUUCAGUAGGUGUCGGGU 5'  
query=miR1167, target=R03G\_10866, score=4, range=406-427, strand=  
target 5' GUUUCAGUCAUCUAUAGUCCA 3'

query 3' CAAAGUUCAGUAGGUGUCGGGU 5'  
query=miR1167, target=R03G\_16545, score=4, range=406-427, strand=  
target 5' GUUUCAGUCAUCUAUAGUCCA 3'

query 3' CAAAGUUCAGUAGGUGUCGGGU 5'  
query=miR1167, target=R03G\_13271, score=4, range=406-427, strand=  
target 5' GUUUCAGUCAUCUAUAGUCCA 3'



::::: ::::::::::::::::::::  
query 3' CAAAGUUCAGUAGGUGUCGGGU 5'  
query=miR1167, target=R03G\_00255, score=4, range=406-427, strand=  
target 5' GUUUCAGUCAUCUAUAGUCCA 3'  
::::: ::::::::::::::::::::  
query 3' CAAAGUUCAGUAGGUGUCGGGU 5'  
query=miR1167, target=R03G\_12954, score=4, range=406-427, strand=  
target 5' GUUUCAGUCGUUCACAGUCCA 3'  
::::: ::::::::::::::::::::  
query 3' CAAAGUUCAGUAGGUGUCGGGU 5'  
query=miR1167, target=R03G\_13266, score=4, range=184-205, strand=  
target 5' GUUUCAGUCAUCUAUAGUCCA 3'  
::::: ::::::::::::::::::::  
query 3' CAAAGUUCAGUAGGUGUCGGGU 5'  
query=miR1167, target=R03G\_03766, score=4, range=184-205, strand=  
target 5' GUUUCAGUCAUCUAUAGUCCA 3'  
::::: ::::::::::::::::::::  
query 3' CAAAGUUCAGUAGGUGUCGGGU 5'  
query=miR1167, target=R03G\_13147, score=4, range=184-205, strand=  
target 5' GUUUCAGUCAUCUAUAGUCCA 3'  
::::: ::::::::::::::::::::  
query 3' CAAAGUUCAGUAGGUGUCGGGU 5'  
query=miR1167, target=R03G\_06722, score=4, range=406-427, strand=  
target 5' GUUUCAGUCAUCUAUAGUCCA 3'  
::::: ::::::::::::::::::::  
query 3' CAAAGUUCAGUAGGUGUCGGGU 5'  
query=miR6114-5p, target=R03G\_00301, score=0, range=954-974, stra  
target 5' UCACGUUCAUGGUGCUUUCGA 3'  
::::: ::::::::::::::::::::  
query 3' AGUGCAAGUACCACGAAAGCU 5'  
query=miR6114-5p, target=R03G\_13432, score=0, range=348-368, stra  
target 5' UCACGUUCAUGGUGCUUUCGA 3'  
::::: ::::::::::::::::::::  
query 3' AGUGCAAGUACCACGAAAGCU 5'  
query=miR6478, target=R03G\_19017, score=0, range=1-22, strand=-1  
target 5' CUACCAACUGAGCUAAGGCCGG 3'  
::::: ::::::::::::::::::::  
query 3' GAUGGUUGACUCGAUUCGGCC 5'  
query=miR6478, target=R03G\_19074, score=0, range=1-22, strand=-1  
target 5' CUACCAACUGAGCUAAGGCCGG 3'  
::::: ::::::::::::::::::::  
query 3' GAUGGUUGACUCGAUUCGGCC 5'  
query=miR6478, target=R03G\_19106, score=0, range=1-22, strand=-1  
target 5' CUACCAACUGAGCUAAGGCCGG 3'  
::::: ::::::::::::::::::::

query 3' GAUGGUUGACUCGAUUCGGCC 5'  
query=miR6478, target=R03G\_19164, score=0, range=1-22, strand=-1  
target 5' CUACCAACUGAGCUAAGGCCGG 3'  
.....  
query 3' GAUGGUUGACUCGAUUCGGCC 5'  
query=miR6478, target=R03G\_19144, score=0, range=1-22, strand=-1  
target 5' CUACCAACUGAGCUAAGGCCGG 3'  
.....  
query 3' GAUGGUUGACUCGAUUCGGCC 5'  
query=miR6478, target=R03G\_19194, score=0, range=1-22, strand=-1  
target 5' CUACCAACUGAGCUAAGGCCGG 3'  
.....  
query 3' GAUGGUUGACUCGAUUCGGCC 5'  
query=miR6478, target=R03G\_19112, score=0, range=1-22, strand=-1  
target 5' CUACCAACUGAGCUAAGGCCGG 3'  
.....  
query 3' GAUGGUUGACUCGAUUCGGCC 5'  
query=miR6478, target=R03G\_19210, score=0, range=1-22, strand=-1  
target 5' CUACCAACUGAGCUAAGGCCGG 3'  
.....  
query 3' GAUGGUUGACUCGAUUCGGCC 5'  
query=miR6478, target=R03G\_19195, score=0, range=1-22, strand=-1  
target 5' CUACCAACUGAGCUAAGGCCGG 3'  
.....  
query 3' GAUGGUUGACUCGAUUCGGCC 5'  
query=miR5809, target=R03G\_16804, score=0, range=1387-1404, stran  
target 5' GCUUUGGUCGCCAGCCGA 3'  
.....  
query 3' CGAAACCAGCGGUCGGCU 5'  
query=miR5809, target=R03G\_10715, score=0, range=1387-1404, stran  
target 5' GCUUUGGUCGCCAGCCGA 3'  
.....  
query 3' CGAAACCAGCGGUCGGCU 5'  
query=miR5809, target=R03G\_04309, score=0, range=1327-1344, stran  
target 5' GCUUUGGUCGCCAGCCGA 3'  
.....  
query 3' CGAAACCAGCGGUCGGCU 5'  
query=miR5809, target=R03G\_16610, score=0, range=193-210, strand=  
target 5' GCUUUGGUCGCCAGCCGA 3'  
.....  
query 3' CGAAACCAGCGGUCGGCU 5'  
query=miR5809, target=R03G\_16602, score=0, range=193-210, strand=  
target 5' GCUUUGGUCGCCAGCCGA 3'  
.....  
query 3' CGAAACCAGCGGUCGGCU 5'

query=miR5809, target=R03G\_15108, score=0, range=796-813, strand=  
target 5' GCUUUGGUCGCCAGCCGA 3'  
:::::::::::::::::::  
query 3' CGAAACCAGCGGUCGGCU 5'  
query=miR5809, target=R03G\_13293, score=0, range=1387-1404, stran  
target 5' GCUUUGGUCGCCAGCCGA 3'  
:::::::::::::::::::  
query 3' CGAAACCAGCGGUCGGCU 5'  
query=miR5809, target=R03G\_10177, score=0, range=1387-1404, stran  
target 5' GCUUUGGUCGCCAGCCGA 3'  
:::::::::::::::::::  
query 3' CGAAACCAGCGGUCGGCU 5'  
query=miR5809, target=R03G\_12007, score=0, range=1387-1404, stran  
target 5' GCUUUGGUCGCCAGCCGA 3'  
:::::::::::::::::::  
query 3' CGAAACCAGCGGUCGGCU 5'  
query=miR5809, target=R03G\_09718, score=0, range=1387-1404, stran  
target 5' GCUUUGGUCGCCAGCCGA 3'  
:::::::::::::::::::  
query 3' CGAAACCAGCGGUCGGCU 5'  
query=miR5809, target=R03G\_03867, score=0, range=1384-1401, stran  
target 5' GCUUUGGUCGCCAGCCGA 3'  
:::::::::::::::::::  
query 3' CGAAACCAGCGGUCGGCU 5'  
query=miR5809, target=R03G\_15131, score=0, range=1384-1401, stran  
target 5' GCUUUGGUCGCCAGCCGA 3'  
:::::::::::::::::::  
query 3' CGAAACCAGCGGUCGGCU 5'  
query=miR5809, target=R03G\_13439, score=0, range=1384-1401, stran  
target 5' GCUUUGGUCGCCAGCCGA 3'  
:::::::::::::::::::  
query 3' CGAAACCAGCGGUCGGCU 5'  
query=miR5809, target=R03G\_01475, score=0, range=1384-1401, stran  
target 5' GCUUUGGUCGCCAGCCGA 3'  
:::::::::::::::::::  
query 3' CGAAACCAGCGGUCGGCU 5'  
query=miR5809, target=R03G\_15003, score=0, range=286-303, strand=  
target 5' GCUUUGGUCGCCAGCCGA 3'  
:::::::::::::::::::  
query 3' CGAAACCAGCGGUCGGCU 5'  
query=miR5809, target=R03G\_01004, score=0, range=1384-1401, stran  
target 5' GCUUUGGUCGCCAGCCGA 3'  
:::::::::::::::::::  
query 3' CGAAACCAGCGGUCGGCU 5'  
query=miR5809, target=R03G\_00977, score=0, range=646-663, strand=

```

target 5' GCUUUGGUCGCCAGCCGA 3'
:
query 3' CGAAACCAGCGGUCGGCU 5'
query=miR5809, target=R03G_09043, score=0, range=658-675, strand=
target 5' GCUUUGGUCGCCAGCCGA 3'
:
query 3' CGAAACCAGCGGUCGGCU 5'
query=miR5809, target=R03G_03851, score=3, range=820-838, strand=
target 5' GCUUACGGUCGCCAGCUGA 3'
:
query 3' CGAA-ACCAGCGGUCGGCU 5'
query=miR5809, target=R03G_04551, score=3, range=2132-2148, stran
target 5' GCUUUGGUC-UCAGCCGA 3'
:
query 3' CGAAACCAGCGGUCGGCU 5'
query=miR5809, target=R03G_01282, score=4, range=712-729, strand=
target 5' GCUUUGGUCGACAGCCUA 3'
:
query 3' CGAAACCAGCGGUCGGCU 5'
query=miR5809, target=R03G_02774, score=4, range=5454-5471, stran
target 5' CCUUGGGCGCCAGCCGU 3'
:
query 3' CGAAACCAGCGGUCGGCU 5'
query=miR8578.2, target=R03G_08806, score=0, range=1878-1896, str
target 5' CAUUGCUAUAUACACUCAUA 3'
:
query 3' GUAACGAUUAUGUGAGUAU 5'
query=miR8578.2, target=R03G_14186, score=0, range=1878-1896, str
target 5' CAUUGCUAUAUACACUCAUA 3'
:
query 3' GUAACGAUUAUGUGAGUAU 5'
query=miR8578.2, target=R03G_14870, score=0, range=1878-1896, str
target 5' CAUUGCUAUAUACACUCAUA 3'
:
query 3' GUAACGAUUAUGUGAGUAU 5'
query=miR8578.2, target=R03G_14190, score=0, range=1878-1896, str
target 5' CAUUGCUAUAUACACUCAUA 3'
:
query 3' GUAACGAUUAUGUGAGUAU 5'
query=miR8578.2, target=R03G_13228, score=0, range=1467-1485, str
target 5' CAUUGCUAUAUACACUCAUA 3'
:
query 3' GUAACGAUUAUGUGAGUAU 5'
query=miR8578.2, target=R03G_01029, score=0, range=837-855, stran
target 5' CAUUGCUAUAUACACUCAUA 3'

```



```
query=miR1214, target=R03G_14795, score=0, range=1271-1290, stran
target 5' GUGCCGCGAGACUCUAAGUA 3'
:::::::::::
query 3' CACGGCGCUCUGAGAUUCAU 5'
query=miR1214, target=R03G_16392, score=2, range=251-270, strand=
target 5' GUGUGGUGAGACUCUAAGUA 3'
:::: :::::::::::::
query 3' CACGGCGCUCUGAGAUUCAU 5'
query=miR1214, target=R03G_02091, score=3.5, range=112-130, stran
target 5' GUACC-CGAGACUUAAGUG 3'
:: :: :::::::::::::
query 3' CACGGCGCUCUGAGAUUCAU 5'
query=miR1214, target=R03G_16382, score=4, range=1123-1143, stran
target 5' GUAGCCGCGAGAUUCUACGUA 3'
:: ::::::::::::: :::
query 3' CA-CGGCGCUCUGAGAUUCAU 5'
query=miR7729a-5p, target=R03G_17349, score=0, range=396-418, str
target 5' GCUCACUGUCCUACUUGAAAACA 3'
:::::::::::
query 3' CGAGUGACAGGAUGAACUUUUGU 5'
query=miR7729a-5p, target=R03G_06738, score=0, range=399-421, str
target 5' GCUCACUGUCCUACUUGAAAACA 3'
:::::::::::
query 3' CGAGUGACAGGAUGAACUUUUGU 5'
query=miR7729a-5p, target=R03G_12528, score=0, range=162-184, str
target 5' GCUCACUGUCCUACUUGAAAACA 3'
:::::::::::
query 3' CGAGUGACAGGAUGAACUUUUGU 5'
query=miR7729a-5p, target=R03G_02826, score=0, range=162-184, str
target 5' GCUCACUGUCCUACUUGAAAACA 3'
:::::::::::
query 3' CGAGUGACAGGAUGAACUUUUGU 5'
query=miR7729a-5p, target=R03G_15905, score=1, range=162-184, str
target 5' GCUCACUGUCCUGCUUGAAAACA 3'
:::::::::::
query 3' CGAGUGACAGGAUGAACUUUUGU 5'
query=miR7729a-5p, target=R03G_16371, score=1, range=162-184, str
target 5' GUUUACUGUCCUACUUGAAAACA 3'
:::::::::::
query 3' CGAGUGACAGGAUGAACUUUUGU 5'
query=miR7729a-5p, target=R03G_07975, score=1, range=65-87, stran
target 5' GUUUACUGUCCUACUUGAAAACA 3'
:::::::::::
query 3' CGAGUGACAGGAUGAACUUUUGU 5'
query=miR7729a-5p, target=R03G_17352, score=1, range=131-153,
```

strand=-1  
target 5' GUUUACUGUCCUACUUGAAAACA 3'  
.....  
query 3' CGAGUGACAGGAUGAACUUUUGU 5'  
query=miR7729a-5p, target=R03G\_16723, score=1.5, range=131-153,  
strand=-1  
target 5' GCUCAUUGUCCUAAUUGAAAACA 3'  
.....  
query 3' CGAGUGACAGGAUGAACUUUUGU 5'  
query=miR7729a-5p, target=R03G\_04668, score=3, range=131-153,  
strand=-1  
target 5' GCUUAUUGUCCUACUUGAAAAA 3'  
..... :  
query 3' CGAGUGACAGGAUGAACUUUUGU 5'  
query=miR7729a-5p, target=R03G\_03112, score=4, range=131-153,  
strand=-1  
target 5' GCUUUUUGUCCUAAUUGGAAACA 3'  
... ..  
query 3' CGAGUGACAGGAUGAACUUUUGU 5'  
query=miR7729a-5p, target=R03G\_05522, score=4, range=131-153,  
strand=-1  
target 5' GCUUUUUGUCCUAAUUGGAAACA 3'  
... ..  
query 3' CGAGUGACAGGAUGAACUUUUGU 5'  
query=miR7729a-5p, target=R03G\_02227, score=4, range=131-153,  
strand=-1  
target 5' GCUUUUUGUCCUAAUUGGAAACA 3'  
... ..  
query 3' CGAGUGACAGGAUGAACUUUUGU 5'  
query=miR7729a-5p, target=R03G\_06406, score=4, range=131-153,  
strand=-1  
target 5' AUUUACUGUCCUACUCGAAAACA 3'  
..... :  
query 3' CGAGUGACAGGAUGAACUUUUGU 5'  
query=miR7753-3p, target=R03G\_15889, score=0, range=434-453, stra  
target 5' CCUUCUUCUCCAUUGCUCAA 3'  
.....  
query 3' GGAAGAAGAGGUAACGAGUU 5'  
query=miR7753-3p, target=R03G\_17257, score=0, range=434-453, stra  
target 5' CCUUCUUCUCCAUUGCUCAA 3'  
.....  
query 3' GGAAGAAGAGGUAACGAGUU 5'  
query=miR7753-3p, target=R03G\_11951, score=0, range=434-453, stra  
target 5' CCUUCUUCUCCAUUGCUCAA 3'  
.....





target 5' UCUACUUCUCCACUGCUCAA 3'  
.:: :::::::::: ::::::::::  
query 3' GGAAGAAGAGGUAACGAGUU 5'  
query=miR7753-3p, target=R03G\_13273, score=3.5, range=518-537,  
strand=-1  
target 5' UCUACUUCUCCACUGCUCAA 3'  
.:: :::::::::: ::::::::::  
query 3' GGAAGAAGAGGUAACGAGUU 5'  
query=miR7753-3p, target=R03G\_10217, score=3.5, range=518-537,  
strand=-1  
target 5' UCUACUUCUCCACUGCUCAA 3'  
.:: :::::::::: ::::::::::  
query 3' GGAAGAAGAGGUAACGAGUU 5'  
query=miR7753-3p, target=R03G\_11538, score=3.5, range=518-537,  
strand=-1  
target 5' UCUACUUCUCCACUGCUCAA 3'  
.:: :::::::::: ::::::::::  
query 3' GGAAGAAGAGGUAACGAGUU 5'  
query=miR7753-3p, target=R03G\_11409, score=3.5, range=518-537,  
strand=-1  
target 5' UCUACUUCUCCACUGCUCAA 3'  
.:: :::::::::: ::::::::::  
query 3' GGAAGAAGAGGUAACGAGUU 5'  
query=miR7753-3p, target=R03G\_07307, score=3.5, range=518-537,  
strand=-1  
target 5' UCUACUUCUCCACUGCUCAA 3'  
.:: :::::::::: ::::::::::  
query 3' GGAAGAAGAGGUAACGAGUU 5'  
query=miR7753-3p, target=R03G\_09930, score=3.5, range=518-537,  
strand=-1  
target 5' UCUACUUCUCCACUGCUCAA 3'  
.:: :::::::::: ::::::::::  
query 3' GGAAGAAGAGGUAACGAGUU 5'  
query=miR7753-3p, target=R03G\_14550, score=3.5, range=518-537,  
strand=-1  
target 5' UCUACUUCUCCACUGCUCAA 3'  
.:: :::::::::: ::::::::::  
query 3' GGAAGAAGAGGUAACGAGUU 5'  
query=miR7753-3p, target=R03G\_15898, score=3.5, range=518-537,  
strand=-1  
target 5' UCUACUUCUCCACUGCUCAA 3'  
.:: :::::::::: ::::::::::  
query 3' GGAAGAAGAGGUAACGAGUU 5'  
query=miR7753-3p, target=R03G\_11969, score=3.5, range=518-537,  
strand=-1

target 5' UCUACUUCUCCACUGCUCAA 3'  
.:: :::::::::: ::::::::::  
query 3' GGAAGAAGAGGUAACGAGUU 5'  
query=miR7753-3p, target=R03G\_09601, score=3.5, range=518-537,  
strand=-1  
target 5' UCUACUUCUCCACUGCUCAA 3'  
.:: :::::::::: ::::::::::  
query 3' GGAAGAAGAGGUAACGAGUU 5'  
query=miR7753-3p, target=R03G\_11237, score=3.5, range=518-537,  
strand=-1  
target 5' UCUACUUCUCCACUGCUCAA 3'  
.:: :::::::::: ::::::::::  
query 3' GGAAGAAGAGGUAACGAGUU 5'  
query=miR7753-3p, target=R03G\_04683, score=3.5, range=518-537,  
strand=-1  
target 5' UCUACUUCUCCACUGCUCAA 3'  
.:: :::::::::: ::::::::::  
query 3' GGAAGAAGAGGUAACGAGUU 5'  
query=miR7753-3p, target=R03G\_04212, score=3.5, range=518-537,  
strand=-1  
target 5' UCUACUUCUCCACUGCUCAA 3'  
.:: :::::::::: ::::::::::  
query 3' GGAAGAAGAGGUAACGAGUU 5'  
query=miR7753-3p, target=R03G\_07698, score=3.5, range=518-537,  
strand=-1  
target 5' UCUACUUCUCCACUGCUCAA 3'  
.:: :::::::::: ::::::::::  
query 3' GGAAGAAGAGGUAACGAGUU 5'  
query=miR7753-3p, target=R03G\_07721, score=3.5, range=518-537,  
strand=-1  
target 5' UCUACUUCUCCACUGCUCAA 3'  
.:: :::::::::: ::::::::::  
query 3' GGAAGAAGAGGUAACGAGUU 5'  
query=miR7753-3p, target=R03G\_01728, score=3.5, range=476-495,  
strand=-1  
target 5' UCUACUUCUCCACUGCUCAA 3'  
.:: :::::::::: ::::::::::  
query 3' GGAAGAAGAGGUAACGAGUU 5'  
query=miR7753-3p, target=R03G\_16827, score=3.5, range=518-537,  
strand=-1  
target 5' UCUACUUCUCCACUGCUCAA 3'  
.:: :::::::::: ::::::::::  
query 3' GGAAGAAGAGGUAACGAGUU 5'  
query=miR7753-3p, target=R03G\_15150, score=3.5, range=458-477,  
strand=-1



```

.:: : : : : : : : : : :
query 3' GGAAGAAGAGGUAACGAGUU 5'
query=miR7753-3p, target=R03G_06731, score=4, range=518-537, stra
target 5' UCUACUUCUCCACUGCUCAG 3'
.:: : : : : : : : : : :
query 3' GGAAGAAGAGGUAACGAGUU 5'
query=miR7753-3p, target=R03G_06286, score=4, range=634-653, stra
target 5' CCGUCGUCUUUUAUUGCUCAA 3'
:: :: : : : : : : : : : :
query 3' GGAAGAAGAGGUAACGAGUU 5'
query=miR2100-5p, target=R03G_05925, score=0, range=867-888, stra
target 5' UCGUUUGGCAGACUUGAGAGCA 3'
: : : : : : : : : : : :
query 3' AGCAAACCGUCUGAACUCUCGU 5'
query=miR2100-5p, target=R03G_12075, score=0, range=867-888, stra
target 5' UCGUUUGGCAGACUUGAGAGCA 3'
: : : : : : : : : : : :
query 3' AGCAAACCGUCUGAACUCUCGU 5'
query=miR2100-5p, target=R03G_16708, score=0, range=867-888, stra
target 5' UCGUUUGGCAGACUUGAGAGCA 3'
: : : : : : : : : : : :
query 3' AGCAAACCGUCUGAACUCUCGU 5'
query=miR2100-5p, target=R03G_09951, score=0, range=1125-1146,
strand=-1
target 5' UCGUUUGGCAGACUUGAGAGCA 3'
: : : : : : : : : : : :
query 3' AGCAAACCGUCUGAACUCUCGU 5'
query=miR2100-5p, target=R03G_00684, score=0, range=246-267, stra
target 5' UCGUUUGGCAGACUUGAGAGCA 3'
: : : : : : : : : : : :
query 3' AGCAAACCGUCUGAACUCUCGU 5'
query=miR2100-5p, target=R03G_11952, score=3, range=1245-1266,
strand=-1
target 5' ACGCUUAGCAGACUUGAGAGCA 3'
:: :: : : : : : : : : : :
query 3' AGCAAACCGUCUGAACUCUCGU 5'
query=miR2100-5p, target=R03G_12964, score=3, range=867-888, stra
target 5' ACGCUUAGCAGACUUGAGAGCA 3'
:: :: : : : : : : : : : :
query 3' AGCAAACCGUCUGAACUCUCGU 5'
query=miR2100-5p, target=R03G_09927, score=3, range=867-888, stra
target 5' ACGCUUAGCAGACUUGAGAGCA 3'
:: :: : : : : : : : : : :
query 3' AGCAAACCGUCUGAACUCUCGU 5'
query=miR2100-5p, target=R03G_05927, score=3, range=867-888, stra

```

target 5' ACGCUUAGCAGACUUGAGAGCA 3'  
:: :: ::::::::::::::::::::  
query 3' AGCAAACCGUCUGAACUCUCGU 5'  
query=miR2100-5p, target=R03G\_12669, score=3, range=867-888, stra  
target 5' ACGCUUAGCAGACUUGAGAGCA 3'  
:: :: ::::::::::::::::::::  
query 3' AGCAAACCGUCUGAACUCUCGU 5'  
query=miR2100-5p, target=R03G\_12961, score=3, range=1200-1221,  
strand=-1  
target 5' ACGCUUAGCAGACUUGAGAGCA 3'  
:: :: ::::::::::::::::::::  
query 3' AGCAAACCGUCUGAACUCUCGU 5'  
query=miR2100-5p, target=R03G\_05524, score=3, range=867-888, stra  
target 5' ACGCUUAGCAGACUUGAGAGCA 3'  
:: :: ::::::::::::::::::::  
query 3' AGCAAACCGUCUGAACUCUCGU 5'  
query=miR6267a, target=R03G\_10719, score=0, range=901-921, strand  
target 5' CACACUCUACCACCUCUCUCA 3'  
::::::::::::::::::::::::::  
query 3' GUGUGAGAUGGUGGAGAGAGU 5'  
query=miR6267a, target=R03G\_01096, score=3, range=212-232, strand  
target 5' CACACUCCACCACCUCUCCUCA 3'  
:::::::::: :::::::::: :::::  
query 3' GUGUGAGAUGGUGGAGAGAGU 5'  
query=miR6267a, target=R03G\_04411, score=4, range=1135-1154, stra  
target 5' CAGGC-CUAUCACCUCUCUCG 3'  
:: .: ::::::::::::::::::::  
query 3' GUGUGAGAUGGUGGAGAGAGU 5'  
query=miR6267a, target=R03G\_08755, score=4, range=371-390, strand  
target 5' CAC-CUCCACCACUUCUUUCA 3'  
::: ::: ::::::::::::::::::::  
query 3' GUGUGAGAUGGUGGAGAGAGU 5'  
query=miR6267a, target=R03G\_05899, score=4, range=1329-1348, stra  
target 5' CAC-CACUACCACCACUCUCA 3'  
::: : ::::::::::::::::::::  
query 3' GUGUGAGAUGGUGGAGAGAGU 5'  
query=miR6267a, target=R03G\_16063, score=4, range=2-22, strand=-1  
target 5' CAAUCUCUAUCAUCUCUCUCA 3'  
:: ::::::::::::::::::::  
query 3' GUGUGAGAUGGUGGAGAGAGU 5'  
query=miR6267a, target=R03G\_00821, score=4, range=539-559, strand  
target 5' UACGCUCCUCCACCUCUCUCA 3'  
.::::: ::::::::::::::::::::  
query 3' GUGUGAGAUGGUGGAGAGAGU 5'  
query=miR6267a, target=R03G\_11293, score=4, range=168-187, strand

target 5' CAC-CUCUAUCACCUCUGUCA 3'  
::: :::::.....: :::  
query 3' GUGUGAGAUGGUGGAGAGAGU 5'  
query=miR6267a, target=R03G\_01095, score=4, range=317-336, strand  
target 5' CACUCUUU-CCACCUCUCUCG 3'  
::: ::.: :.....:  
query 3' GUGUGAGAUGGUGGAGAGAGU 5'  
query=miR1044-3p, target=R03G\_16569, score=3.5, range=419-438,  
strand=1  
target 5' CAAACAGAUUACUUACCACA 3'  
:.....: :.....:  
query 3' GUUUGUUUUAUACAGUGGUGU 5'  
query=miR1044-3p, target=R03G\_01127, score=3.5, range=738-756,  
strand=1  
target 5' UGAG-ACAUUUGUCACCACA 3'  
... : :.....:  
query 3' GUUUGUUUUAUACAGUGGUGU 5'  
query=miR1044-3p, target=R03G\_15999, score=4, range=425-444, stra  
target 5' GAAAAGAAUAUGUUACCACG 3'  
::: :.....:  
query 3' GUUUGUUUUAUACAGUGGUGU 5'  
query=miR1044-3p, target=R03G\_02003, score=4, range=1002-1021,  
strand=-1  
target 5' CAAGCGAGUCUGUCACCACA 3'  
:.....: :.....:  
query 3' GUUUGUUUUAUACAGUGGUGU 5'  
query=miR1044-3p, target=R03G\_00409, score=4, range=220-240, stra  
target 5' CAACACAAAUAUGUUAUCACC 3'  
::: :.....:  
query 3' GUU-UGUUUUAUACAGUGGUGU 5'  
query=miR1044-3p, target=R03G\_04064, score=4, range=697-716, stra  
target 5' UUAUCCGAUAUGUCACCACA 3'  
. : : :.....:  
query 3' GUUUGUUUUAUACAGUGGUGU 5'  
query=miR1044-3p, target=R03G\_07362, score=4, range=739-757, stra  
target 5' CAAACAAA-AUGACACCACA 3'  
:.....: : :.....:  
query 3' GUUUGUUUUAUACAGUGGUGU 5'  
query=miR5526, target=R03G\_17296, score=0, range=189-207, strand=  
target 5' CUCAUACCUGACUCAACUC 3'  
:.....:  
query 3' GAGUAUGGACUGAGUUGAG 5'  
query=miR5526, target=R03G\_04752, score=3, range=4864-4882, stran  
target 5' UUAGUACCUGACUUAACUC 3'  
. : : :.....:



```
::: .. :::::::::::::::
query 3' GAGUAUGGACUGAGUUGAG 5'
query=miR5526, target=R03G_08626, score=4, range=562-579, strand=
target 5' AACAA-ACCUGACUCAAUUC 3'
:: :::::::::::::::
query 3' GAGUAUGGACUGAGUUGAG 5'
query=miR2108b, target=R03G_04592, score=0, range=1276-1295, stra
target 5' ACUACAAACACAUACAUAUA 3'
:::::::::::::::::::
query 3' UGAUGUUUGUGUAUGUAAUU 5'
query=miR2108b, target=R03G_00289, score=1, range=832-851, strand
target 5' ACUACAAACACAUACAUAUA 3'
:::::::::::::::::::
query 3' UGAUGUUUGUGUAUGUAAUU 5'
query=miR2108b, target=R03G_09183, score=1, range=1237-1256, stra
target 5' ACUACAAACACAUACAUAUA 3'
:::::::::::::::::::
query 3' UGAUGUUUGUGUAUGUAAUU 5'
query=miR2108b, target=R03G_17351, score=1, range=832-851, strand
target 5' ACUACAAACACAUACAUAUA 3'
:::::::::::::::::::
query 3' UGAUGUUUGUGUAUGUAAUU 5'
query=miR2108b, target=R03G_10735, score=1, range=1549-1568, stra
target 5' ACUACAAACACAUACAUAUA 3'
:::::::::::::::::::
query 3' UGAUGUUUGUGUAUGUAAUU 5'
query=miR2108b, target=R03G_03585, score=1, range=694-713, strand
target 5' ACUACAAACACAUACAUAUA 3'
:::::::::::::::::::
query 3' UGAUGUUUGUGUAUGUAAUU 5'
query=miR2108b, target=R03G_10040, score=1, range=694-713, strand
target 5' ACUACAAACACAUACAUAUA 3'
:::::::::::::::::::
query 3' UGAUGUUUGUGUAUGUAAUU 5'
query=miR2108b, target=R03G_17257, score=1, range=2020-2039, stra
target 5' ACUACAAACACAUACAUAUA 3'
:::::::::::::::::::
query 3' UGAUGUUUGUGUAUGUAAUU 5'
query=miR2108b, target=R03G_15889, score=1, range=2020-2039, stra
target 5' ACUACAAACACAUACAUAUA 3'
:::::::::::::::::::
query 3' UGAUGUUUGUGUAUGUAAUU 5'
query=miR2108b, target=R03G_05424, score=1, range=2020-2039, stra
target 5' ACUACAAACACAUACAUAUA 3'
:::::::::::::::::::
```



query 3' UGAUGUUUGUGUAUGUAAUU 5'  
query=miR2108b, target=R03G\_00872, score=2.5, range=640-659, stra  
target 5' ACAGAAAACACAUACAUUAA 3'  
:: . ::::::::::::::::::::  
query 3' UGAUGUUUGUGUAUGUAAUU 5'  
query=miR2108b, target=R03G\_09728, score=3.5, range=155-174, stra  
target 5' AUUACAAACAUACAUAAA 3'  
: ::::::::::::::::::::  
query 3' UGAUGUUUGUGUAUGUAAUU 5'  
query=miR2108b, target=R03G\_07697, score=3.5, range=430-449, stra  
target 5' AUAACAAUACAUACAUUGA 3'  
: . ::::::::::::::::::::  
query 3' UGAUGUUUGUGUAUGUAAUU 5'  
query=miR2108b, target=R03G\_04681, score=3.5, range=694-713, stra  
target 5' AUAACAAUACAUACAUUGA 3'  
: . ::::::::::::::::::::  
query 3' UGAUGUUUGUGUAUGUAAUU 5'  
query=miR2108b, target=R03G\_16136, score=3.5, range=2020-2039,  
strand=1  
target 5' AUAACAAUACAUACAUUGA 3'  
: . ::::::::::::::::::::  
query 3' UGAUGUUUGUGUAUGUAAUU 5'  
query=miR2108b, target=R03G\_10217, score=3.5, range=2104-2123,  
strand=1  
target 5' AUAACAAUACAUACAUUGA 3'  
: . ::::::::::::::::::::  
query 3' UGAUGUUUGUGUAUGUAAUU 5'  
query=miR2108b, target=R03G\_16749, score=3.5, range=2104-2123,  
strand=1  
target 5' AUAACAAUACAUACAUUGA 3'  
: . ::::::::::::::::::::  
query 3' UGAUGUUUGUGUAUGUAAUU 5'  
query=miR2108b, target=R03G\_13273, score=3.5, range=2104-2123,  
strand=1  
target 5' AUAACAAUACAUACAUUGA 3'  
: . ::::::::::::::::::::  
query 3' UGAUGUUUGUGUAUGUAAUU 5'  
query=miR2108b, target=R03G\_13145, score=3.5, range=2104-2123,  
strand=1  
target 5' AUAACAAUACAUACAUUGA 3'  
: . ::::::::::::::::::::  
query 3' UGAUGUUUGUGUAUGUAAUU 5'  
query=miR2108b, target=R03G\_09758, score=4, range=3946-3965, stra  
target 5' AUUACAAUACAAACAUUAG 3'  
: ::::::::::::::::::::

query 3' UGAUGUUUGUGUAUGUAAUU 5'  
query=miR2108b, target=R03G\_04056, score=4, range=1187-1206, strand  
target 5' AGUAUGAACACGUACAUAUGA 3'  
: :::::::::::::::::::::  
query 3' UGAUGUUUGUGUAUGUAAUU 5'  
query=miR2108b, target=R03G\_00433, score=4, range=739-758, strand  
target 5' UCUUCAACAUGUACAUAUA 3'  
:: :::::::::::::::::::::  
query 3' UGAUGUUUGUGUAUGUAAUU 5'  
query=miR2108b, target=R03G\_15942, score=4, range=346-365, strand  
target 5' ACGACAAACGCAUAGAUUA 3'  
:: :::::::::::::::::::::  
query 3' UGAUGUUUGUGUAUGUAAUU 5'  
query=miR2108b, target=R03G\_13950, score=4, range=695-713, strand  
target 5' GCUG-AAGCACAUAUAUA 3'  
... :::::::::::::::::::::  
query 3' UGAUGUUUGUGUAUGUAAUU 5'  
query=miR2867-3p, target=R03G\_05953, score=0, range=796-815, strand  
target 5' UGGCCAUCCCAAAGUCCUGA 3'  
:::::::::::::::::::  
query 3' ACCGGUAGGGUUUCAGGACU 5'  
query=miR2867-3p, target=R03G\_17069, score=0, range=661-680, strand  
target 5' UGGCCAUCCCAAAGUCCUGA 3'  
:::::::::::::::::::  
query 3' ACCGGUAGGGUUUCAGGACU 5'  
query=miR2867-3p, target=R03G\_14568, score=0, range=796-815, strand  
target 5' UGGCCAUCCCAAAGUCCUGA 3'  
:::::::::::::::::::  
query 3' ACCGGUAGGGUUUCAGGACU 5'  
query=miR2867-3p, target=R03G\_09967, score=0, range=796-815, strand  
target 5' UGGCCAUCCCAAAGUCCUGA 3'  
:::::::::::::::::::  
query 3' ACCGGUAGGGUUUCAGGACU 5'  
query=miR2867-3p, target=R03G\_00256, score=0, range=796-815, strand  
target 5' UGGCCAUCCCAAAGUCCUGA 3'  
:::::::::::::::::::  
query 3' ACCGGUAGGGUUUCAGGACU 5'  
query=miR2867-3p, target=R03G\_17449, score=0, range=796-815, strand  
target 5' UGGCCAUCCCAAAGUCCUGA 3'  
:::::::::::::::::::  
query 3' ACCGGUAGGGUUUCAGGACU 5'  
query=miR2867-3p, target=R03G\_14361, score=0, range=796-815, strand  
target 5' UGGCCAUCCCAAAGUCCUGA 3'  
:::::::::::::::::::  
query 3' ACCGGUAGGGUUUCAGGACU 5'



query=miR2867-3p, target=R03G\_10780, score=2, range=796-815, str  
target 5' UGGCAUCCCAAAGCCCUGA 3'  
:::::::::: ::::  
query 3' ACCGGUAGGGUUUCAGGACU 5'  
query=miR2867-3p, target=R03G\_10773, score=2, range=796-815, str  
target 5' UGGCAUCCCAAAGCCCUGA 3'  
:::::::::: ::::  
query 3' ACCGGUAGGGUUUCAGGACU 5'  
query=miR2867-3p, target=R03G\_08835, score=2, range=106-125, str  
target 5' UGGCCAGCUCAAAGUCCUGA 3'  
::::: ::::::::::::  
query 3' ACCGGUAGGGUUUCAGGACU 5'  
query=miR2867-3p, target=R03G\_11244, score=2, range=796-815, str  
target 5' UGGCCAGCUCAAAGUCCUGA 3'  
::::: ::::::::::::  
query 3' ACCGGUAGGGUUUCAGGACU 5'  
query=miR2867-3p, target=R03G\_01313, score=2, range=796-815, str  
target 5' UGGCCAGCUCAAAGUCCUGA 3'  
::::: ::::::::::::  
query 3' ACCGGUAGGGUUUCAGGACU 5'  
query=miR2867-3p, target=R03G\_13447, score=2, range=796-815, str  
target 5' UGGCCAGCUCAAAGUCCUGA 3'  
::::: ::::::::::::  
query 3' ACCGGUAGGGUUUCAGGACU 5'  
query=miR2867-3p, target=R03G\_15154, score=2, range=796-815, str  
target 5' UGGCCAGCUCAAAGUCCUGA 3'  
::::: ::::::::::::  
query 3' ACCGGUAGGGUUUCAGGACU 5'  
query=miR2867-3p, target=R03G\_10720, score=2, range=796-815, str  
target 5' UGGCCAGCUCAAAGUCCUGA 3'  
::::: ::::::::::::  
query 3' ACCGGUAGGGUUUCAGGACU 5'  
query=miR2867-3p, target=R03G\_10044, score=2, range=796-815, str  
target 5' UGGCCAGCUCAAAGUCCUGA 3'  
::::: ::::::::::::  
query 3' ACCGGUAGGGUUUCAGGACU 5'  
query=miR2867-3p, target=R03G\_03987, score=2, range=796-815, str  
target 5' UGGCCAGCUCAAAGUCCUGA 3'  
::::: ::::::::::::  
query 3' ACCGGUAGGGUUUCAGGACU 5'  
query=miR2867-3p, target=R03G\_03558, score=2, range=796-815, str  
target 5' UGGCCAGCUCAAAGUCCUGA 3'  
::::: ::::::::::::  
query 3' ACCGGUAGGGUUUCAGGACU 5'  
query=miR2867-3p, target=R03G\_01951, score=2, range=796-815, str



::::: ::::::::::::::  
query 3' ACCGGUAGGGUUUCAGGACU 5'  
query=miR2867-3p, target=R03G\_09199, score=2, range=796-815, stra  
target 5' UGGCCAGCUCAAAGUCCUGA 3'  
::::: ::::::::::::::  
query 3' ACCGGUAGGGUUUCAGGACU 5'  
query=miR2867-3p, target=R03G\_12174, score=2, range=121-140, stra  
target 5' UGGCCAGCUCAAAGUCCUGA 3'  
::::: ::::::::::::::  
query 3' ACCGGUAGGGUUUCAGGACU 5'  
query=miR2867-3p, target=R03G\_17213, score=2, range=121-140, stra  
target 5' UGGCCAGCUCAAAGUCCUGA 3'  
::::: ::::::::::::::  
query 3' ACCGGUAGGGUUUCAGGACU 5'  
query=miR2867-3p, target=R03G\_17211, score=2, range=796-815, stra  
target 5' UGGCCAGCUCAAAGUCCUGA 3'  
::::: ::::::::::::::  
query 3' ACCGGUAGGGUUUCAGGACU 5'  
query=miR2867-3p, target=R03G\_12013, score=2, range=121-140, stra  
target 5' UGGCCAGCUCAAAGUCCUGA 3'  
::::: ::::::::::::::  
query 3' ACCGGUAGGGUUUCAGGACU 5'  
query=miR2867-3p, target=R03G\_07119, score=2, range=121-140, stra  
target 5' UGGCCAGCUCAAAGUCCUGA 3'  
::::: ::::::::::::::  
query 3' ACCGGUAGGGUUUCAGGACU 5'  
query=miR2867-3p, target=R03G\_10528, score=2, range=121-140, stra  
target 5' UGGCCAGCUCAAAGUCCUGA 3'  
::::: ::::::::::::::  
query 3' ACCGGUAGGGUUUCAGGACU 5'  
query=miR2867-3p, target=R03G\_11263, score=2, range=121-140, stra  
target 5' UGGCCAGCUCAAAGUCCUGA 3'  
::::: ::::::::::::::  
query 3' ACCGGUAGGGUUUCAGGACU 5'  
query=miR2867-3p, target=R03G\_10742, score=2, range=121-140, stra  
target 5' UGGCCAGCUCAAAGUCCUGA 3'  
::::: ::::::::::::::  
query 3' ACCGGUAGGGUUUCAGGACU 5'  
query=miR2867-3p, target=R03G\_11528, score=2, range=121-140, stra  
target 5' UGGCCAGCUCAAAGUCCUGA 3'  
::::: ::::::::::::::  
query 3' ACCGGUAGGGUUUCAGGACU 5'  
query=miR2867-3p, target=R03G\_07295, score=2, range=628-647, stra  
target 5' UGGCCAGCUCAAAGUCCUGA 3'  
::::: ::::::::::::::

query 3' ACCGGUAGGGUUUCAGGACU 5'  
query=miR2867-3p, target=R03G\_13276, score=2, range=178-197, stra  
target 5' UGGCCAGCUCAAAGUCCUGA 3'  
::::: ::::::::::::::  
query 3' ACCGGUAGGGUUUCAGGACU 5'  
query=miR2867-3p, target=R03G\_01735, score=2, range=796-815, stra  
target 5' UGGCCAGCUCAAAGUCCUGA 3'  
::::: ::::::::::::::  
query 3' ACCGGUAGGGUUUCAGGACU 5'  
query=miR2867-3p, target=R03G\_03617, score=2, range=796-815, stra  
target 5' UGGCCAGCUCAAAGUCCUGA 3'  
::::: ::::::::::::::  
query 3' ACCGGUAGGGUUUCAGGACU 5'  
query=miR2867-3p, target=R03G\_16118, score=2, range=64-83, strand  
target 5' UGGCCAGCUCAAAGUCCUGA 3'  
::::: ::::::::::::::  
query 3' ACCGGUAGGGUUUCAGGACU 5'  
query=miR2867-3p, target=R03G\_10537, score=2, range=619-638, stra  
target 5' UGGCCAGCUCAAAGUCCUGA 3'  
::::: ::::::::::::::  
query 3' ACCGGUAGGGUUUCAGGACU 5'  
query=miR2867-3p, target=R03G\_09542, score=2.5, range=796-815,  
strand=1  
target 5' UGGCCAUCCCAAAGCCCUGG 3'  
::::: ::::::  
query 3' ACCGGUAGGGUUUCAGGACU 5'  
query=miR2867-3p, target=R03G\_16377, score=3, range=121-140, stra  
target 5' UGGCCAGCUCAAAGUUCUGA 3'  
::::: ::::::::::::::  
query 3' ACCGGUAGGGUUUCAGGACU 5'  
query=miR2867-3p, target=R03G\_17406, score=3, range=157-176, stra  
target 5' UGGCCAGCCCAAAGUCCCGA 3'  
::::: :::::::::::::: ::  
query 3' ACCGGUAGGGUUUCAGGACU 5'  
query=miR2867-3p, target=R03G\_05950, score=3, range=274-293, stra  
target 5' UGGCCAGCCCAAAGUCCCGA 3'  
::::: :::::::::::::: ::  
query 3' ACCGGUAGGGUUUCAGGACU 5'  
query=miR2867-3p, target=R03G\_16715, score=3, range=256-275, stra  
target 5' UGGCCAGCCCAAAGUCCCGA 3'  
::::: :::::::::::::: ::  
query 3' ACCGGUAGGGUUUCAGGACU 5'  
query=miR2867-3p, target=R03G\_03605, score=3, range=1258-1277,  
strand=1  
target 5' UGGCCAGCCCAAAGUCCCGA 3'

::::: ::::::::::: ::  
query 3' ACCGGUAGGGUUUCAGGACU 5'  
query=miR2867-3p, target=R03G\_00677, score=3, range=358-377, stra  
target 5' UGGCCAGCCCAAAGUCCCGA 3'  
::::: ::::::::::: ::  
query 3' ACCGGUAGGGUUUCAGGACU 5'  
query=miR2867-3p, target=R03G\_01588, score=3, range=136-155, stra  
target 5' UGGCCAGCCCAAAGUCCCGA 3'  
::::: ::::::::::: ::  
query 3' ACCGGUAGGGUUUCAGGACU 5'  
query=miR2867-3p, target=R03G\_14620, score=3, range=241-260, stra  
target 5' UGGCCUGCUCAAAGUCCUGA 3'  
::::: ::::::::::: ::  
query 3' ACCGGUAGGGUUUCAGGACU 5'  
query=miR2867-3p, target=R03G\_03785, score=3, range=418-437, stra  
target 5' UGGCCUGCUCAAAGUCCUGA 3'  
::::: ::::::::::: ::  
query 3' ACCGGUAGGGUUUCAGGACU 5'  
query=miR2867-3p, target=R03G\_10224, score=3, range=613-632, stra  
target 5' UGGCCUGCUCAAAGUCCUGA 3'  
::::: ::::::::::: ::  
query 3' ACCGGUAGGGUUUCAGGACU 5'  
query=miR2867-3p, target=R03G\_07302, score=3, range=613-632, stra  
target 5' UGGCCUGCUCAAAGUCCUGA 3'  
::::: ::::::::::: ::  
query 3' ACCGGUAGGGUUUCAGGACU 5'  
query=miR2867-3p, target=R03G\_09944, score=3, range=613-632, stra  
target 5' UGGCCUGCUCAAAGUCCUGA 3'  
::::: ::::::::::: ::  
query 3' ACCGGUAGGGUUUCAGGACU 5'  
query=miR2867-3p, target=R03G\_00247, score=3, range=613-632, stra  
target 5' UGGCCUGCUCAAAGUCCUGA 3'  
::::: ::::::::::: ::  
query 3' ACCGGUAGGGUUUCAGGACU 5'  
query=miR2867-3p, target=R03G\_17436, score=3, range=613-632, stra  
target 5' UGGCCUGCUCAAAGUCCUGA 3'  
::::: ::::::::::: ::  
query 3' ACCGGUAGGGUUUCAGGACU 5'  
query=miR2867-3p, target=R03G\_07689, score=3, range=613-632, stra  
target 5' UGGCCUGCUCAAAGUCCUGA 3'  
::::: ::::::::::: ::  
query 3' ACCGGUAGGGUUUCAGGACU 5'  
query=miR2867-3p, target=R03G\_17293, score=3, range=613-632, stra  
target 5' UGGCCUGCUCAAAGUCCUGA 3'  
::::: ::::::::::: ::





query=miR2867-3p, target=R03G\_14987, score=3, range=460-479, strand=1  
target 5' UGGCCUGCUCAAAGUCCUGA 3'  
::::: :::::::::::::::  
query 3' ACCGGUAGGGUUUCAGGACU 5'  
query=miR2867-3p, target=R03G\_17204, score=3, range=676-695, strand=1  
target 5' UGGCCUGCUCAAAGUCCUGA 3'  
::::: :::::::::::::::  
query 3' ACCGGUAGGGUUUCAGGACU 5'  
query=miR2867-3p, target=R03G\_08649, score=3, range=558-577, strand=1  
target 5' UGGCCUGCUCAAAGUCCUGA 3'  
::::: :::::::::::::::  
query 3' ACCGGUAGGGUUUCAGGACU 5'  
query=miR2867-3p, target=R03G\_11757, score=3.5, range=238-257, strand=1  
target 5' UGGCCUGUCCAAAGUCCUGG 3'  
::::: .:::::::::::::  
query 3' ACCGGUAGGGUUUCAGGACU 5'  
query=miR2867-3p, target=R03G\_11765, score=3.5, range=238-257, strand=1  
target 5' UGGCCUGUCCAAAGUCCUGG 3'  
::::: .:::::::::::::  
query 3' ACCGGUAGGGUUUCAGGACU 5'  
query=miR2867-3p, target=R03G\_12030, score=3.5, range=360-379, strand=-1  
target 5' UGAUCAUCCCAAAGUCUUGU 3'  
:: .:::::::::::::  
query 3' ACCGGUAGGGUUUCAGGACU 5'  
query=miR2867-3p, target=R03G\_15271, score=4, range=796-815, strand=1  
target 5' UGGCCAUCACAAAGUCCAGA 3'  
:::::::::: :::::::::: ::  
query 3' ACCGGUAGGGUUUCAGGACU 5'  
query=miR2867-3p, target=R03G\_01962, score=4, range=547-566, strand=1  
target 5' UGGCCAUCACAAAGUCCAGA 3'  
:::::::::: :::::::::: ::  
query 3' ACCGGUAGGGUUUCAGGACU 5'  
query=miR2867-3p, target=R03G\_16725, score=4, range=538-557, strand=1  
target 5' UGGCCAUCACAAAGUCCAGA 3'  
:::::::::: :::::::::: ::  
query 3' ACCGGUAGGGUUUCAGGACU 5'  
query=miR2867-3p, target=R03G\_13714, score=4, range=796-815, strand=1  
target 5' UGGCCAUCACAAAGUCCAGA 3'  
:::::::::: :::::::::: ::  
query 3' ACCGGUAGGGUUUCAGGACU 5'  
query=miR2867-3p, target=R03G\_16742, score=4, range=796-815, strand=1  
target 5' UGGCCAUCACAAAGUCCAGA 3'

:::::::::: :::::::::: ::  
query 3' ACCGGUAGGGUUUCAGGACU 5'  
query=miR2867-3p, target=R03G\_04674, score=4, range=547-566, stra  
target 5' UGGCCAUCACAAAGUCCAGA 3'  
:::::::::: :::::::::: ::  
query 3' ACCGGUAGGGUUUCAGGACU 5'  
query=miR2867-3p, target=R03G\_17416, score=4, range=796-815, stra  
target 5' UGGCCAUCACAAAGUCCAGA 3'  
:::::::::: :::::::::: ::  
query 3' ACCGGUAGGGUUUCAGGACU 5'  
query=miR2867-3p, target=R03G\_02824, score=4, range=796-815, stra  
target 5' UGGCCAUCACAAAGUCCAGA 3'  
:::::::::: :::::::::: ::  
query 3' ACCGGUAGGGUUUCAGGACU 5'  
query=miR2867-3p, target=R03G\_17291, score=4, range=796-815, stra  
target 5' UGGCCAUCACAAAGUCCAGA 3'  
:::::::::: :::::::::: ::  
query 3' ACCGGUAGGGUUUCAGGACU 5'  
query=miR2867-3p, target=R03G\_07702, score=4, range=547-566, stra  
target 5' UGGCCAUCGCAAAGUCCAGA 3'  
:::::::::: :::::::::: ::  
query 3' ACCGGUAGGGUUUCAGGACU 5'  
query=miR2867-3p, target=R03G\_16420, score=4, range=547-566, stra  
target 5' UGGCCAUCGCAAAGUCCAGA 3'  
:::::::::: :::::::::: ::  
query 3' ACCGGUAGGGUUUCAGGACU 5'  
query=miR2867-3p, target=R03G\_07867, score=4, range=547-566, stra  
target 5' UGGCCAUCACAAAGUCCAGA 3'  
:::::::::: :::::::::: ::  
query 3' ACCGGUAGGGUUUCAGGACU 5'  
query=miR2867-3p, target=R03G\_16372, score=4, range=796-815, stra  
target 5' UGGCCAUCACAAAGUCCAGA 3'  
:::::::::: :::::::::: ::  
query 3' ACCGGUAGGGUUUCAGGACU 5'  
query=miR2867-3p, target=R03G\_07705, score=4, range=796-815, stra  
target 5' UGGCCAUCGCAAAGUCCAGA 3'  
:::::::::: :::::::::: ::  
query 3' ACCGGUAGGGUUUCAGGACU 5'  
query=miR2867-3p, target=R03G\_01328, score=4, range=796-815, stra  
target 5' UGGCCAUCACAAAGUCCAGA 3'  
:::::::::: :::::::::: ::  
query 3' ACCGGUAGGGUUUCAGGACU 5'  
query=miR2867-3p, target=R03G\_15282, score=4, range=520-539, stra  
target 5' UGGCCAUCGCAAAGUCCAGA 3'  
:::::::::: :::::::::: ::

query 3' ACCGGUAGGGUUUCAGGACU 5'  
query=miR2867-3p, target=R03G\_17387, score=4, range=796-815, str  
target 5' UGGCCAUCACAAAGUCCAGA 3'  
:::::::::: ::  
query 3' ACCGGUAGGGUUUCAGGACU 5'  
query=miR2867-3p, target=R03G\_17399, score=4, range=796-815, str  
target 5' UGGCCAUCACAAAGUCCAGA 3'  
:::::::::: ::  
query 3' ACCGGUAGGGUUUCAGGACU 5'  
query=miR2867-3p, target=R03G\_06717, score=4, range=796-815, str  
target 5' UGGCCAUCACAAAGUCCAGA 3'  
:::::::::: ::  
query 3' ACCGGUAGGGUUUCAGGACU 5'  
query=miR2867-3p, target=R03G\_16123, score=4, range=796-815, str  
target 5' UGGCCAUCACAAAGUCCAGA 3'  
:::::::::: ::  
query 3' ACCGGUAGGGUUUCAGGACU 5'  
query=miR2867-3p, target=R03G\_07137, score=4, range=796-815, str  
target 5' UGGCCAUCACAAAGUCCAGA 3'  
:::::::::: ::  
query 3' ACCGGUAGGGUUUCAGGACU 5'  
query=miR2867-3p, target=R03G\_05640, score=4, range=691-710, str  
target 5' UGGCCAUCACAAAGUCCAGA 3'  
:::::::::: ::  
query 3' ACCGGUAGGGUUUCAGGACU 5'  
query=miR2867-3p, target=R03G\_11781, score=4, range=691-710, str  
target 5' UGGCCAUCACAAAGUCCAGA 3'  
:::::::::: ::  
query 3' ACCGGUAGGGUUUCAGGACU 5'  
query=miR2867-3p, target=R03G\_16706, score=4, range=520-539, str  
target 5' UGGCCAUCACAAAGUCCAGA 3'  
:::::::::: ::  
query 3' ACCGGUAGGGUUUCAGGACU 5'  
query=miR2867-3p, target=R03G\_05268, score=4, range=796-815, str  
target 5' UGGCCAUCACAAAGUCCAGA 3'  
:::::::::: ::  
query 3' ACCGGUAGGGUUUCAGGACU 5'  
query=miR2867-3p, target=R03G\_09193, score=4, range=520-539, str  
target 5' UGGCCAUCACAAAGUCCAGA 3'  
:::::::::: ::  
query 3' ACCGGUAGGGUUUCAGGACU 5'  
query=miR2867-3p, target=R03G\_17223, score=4, range=520-539, str  
target 5' UGGCCAUCACAAAGUCCAGA 3'  
:::::::::: ::  
query 3' ACCGGUAGGGUUUCAGGACU 5'

query=miR2867-3p, target=R03G\_12663, score=4, range=631-650, strand=1  
target 5' UGGCCAUCACAAAGUCCAGA 3'  
..... ::  
query 3' ACCGGUAGGGUUUCAGGACU 5'  
query=miR2867-3p, target=R03G\_17355, score=4, range=631-650, strand=1  
target 5' UGGCCAUCACAAAGUCCAGA 3'  
..... ::  
query 3' ACCGGUAGGGUUUCAGGACU 5'  
query=miR2867-3p, target=R03G\_00745, score=4, range=517-536, strand=1  
target 5' UGGCCAUCACAAAGUCCAGA 3'  
..... ::  
query 3' ACCGGUAGGGUUUCAGGACU 5'  
query=miR2867-3p, target=R03G\_09842, score=4, range=1450-1469, strand=1  
target 5' CCUUUAUCCCAAAGUCCUGA 3'  
.....  
query 3' ACCGGUAGGGUUUCAGGACU 5'  
query=miR2867-3p, target=R03G\_11534, score=4, range=796-815, strand=1  
target 5' UGGCCAGCUCAAAGCCCUGA 3'  
..... ::  
query 3' ACCGGUAGGGUUUCAGGACU 5'  
query=miR2867-3p, target=R03G\_02700, score=4, range=490-509, strand=1  
target 5' UGGCCAGCUCAAAGUCCCGA 3'  
..... ::  
query 3' ACCGGUAGGGUUUCAGGACU 5'  
query=miR2867-3p, target=R03G\_03570, score=4, range=490-509, strand=1  
target 5' UGGCCAGCUCAAAGUCCCGA 3'  
..... ::  
query 3' ACCGGUAGGGUUUCAGGACU 5'  
query=miR2867-3p, target=R03G\_09955, score=4, range=490-509, strand=1  
target 5' UGGCCAGCUCAAAGUCCCGA 3'  
..... ::  
query 3' ACCGGUAGGGUUUCAGGACU 5'  
query=miR2867-3p, target=R03G\_11273, score=4, range=136-155, strand=1  
target 5' UGGCCAGCUCAAAGUCCCGA 3'  
..... ::  
query 3' ACCGGUAGGGUUUCAGGACU 5'  
query=miR2867-3p, target=R03G\_16905, score=4, range=613-632, strand=1  
target 5' UGGCCAGCUCAAAGUCCCGA 3'  
..... ::  
query 3' ACCGGUAGGGUUUCAGGACU 5'  
query=miR2867-3p, target=R03G\_12196, score=4, range=727-746, strand=1  
target 5' UGGCCAGCUCAAAGUCCAGA 3'  
..... ::  
query 3' ACCGGUAGGGUUUCAGGACU 5'





query=miR7539, target=R03G\_02200, score=4, range=153-172, strand=  
target 5' CAUCAU-GCUCUUCUUUCUUA 3'  
: :::: :::::::::::::::  
query 3' GGAGUAUCGAGAAGAGAGAGU 5'  
query=miR7539, target=R03G\_08090, score=4, range=780-799, strand=  
target 5' CUUCAUGUCUCUU-UCUCUCA 3'  
: :::::: :::::: :::::::  
query 3' GGAGUAUCGAGAAGAGAGAGU 5'  
query=miR3703, target=R03G\_04592, score=0, range=495-514, strand=  
target 5' GGCAAUGGCUGAUGAAUCA 3'  
: :::::::::::::::::::::  
query 3' CCGUUACCGACUACUUAGAU 5'  
query=miR3703, target=R03G\_07737, score=2, range=684-703, strand=  
target 5' GGCAAUGGCUGAUGAAUCA 3'  
: ::::::::::::::::::::: :  
query 3' CCGUUACCGACUACUUAGAU 5'  
query=miR3703, target=R03G\_11969, score=2, range=1323-1342, stran  
target 5' GGCAAUGGCUGAUGAAUCA 3'  
: ::::::::::::::::::::: :  
query 3' CCGUUACCGACUACUUAGAU 5'  
query=miR3703, target=R03G\_13273, score=2, range=1323-1342, stran  
target 5' GGCAAUGGCUGAUGAAUCA 3'  
: ::::::::::::::::::::: :  
query 3' CCGUUACCGACUACUUAGAU 5'  
query=miR3703, target=R03G\_15898, score=2, range=1323-1342, stran  
target 5' GGCAAUGGCUGAUGAAUCA 3'  
: ::::::::::::::::::::: :  
query 3' CCGUUACCGACUACUUAGAU 5'  
query=miR3703, target=R03G\_16749, score=2, range=1323-1342, stran  
target 5' GGCAAUGGCUGAUGAAUCA 3'  
: ::::::::::::::::::::: :  
query 3' CCGUUACCGACUACUUAGAU 5'  
query=miR3703, target=R03G\_11237, score=2, range=1323-1342, stran  
target 5' GGCAAUGGCUGAUGAAUCA 3'  
: ::::::::::::::::::::: :  
query 3' CCGUUACCGACUACUUAGAU 5'  
query=miR3703, target=R03G\_04683, score=2, range=1323-1342, stran  
target 5' GGCAAUGGCUGAUGAAUCA 3'  
: ::::::::::::::::::::: :  
query 3' CCGUUACCGACUACUUAGAU 5'  
query=miR3703, target=R03G\_11409, score=2, range=1323-1342, stran  
target 5' GGCAAUGGCUGAUGAAUCA 3'  
: ::::::::::::::::::::: :  
query 3' CCGUUACCGACUACUUAGAU 5'  
query=miR3703, target=R03G\_04212, score=2, range=1323-1342, stran





query 3' CCGUUACCGACUACUUAGAU 5'  
query=miR3703, target=R03G\_07721, score=2, range=1254-1273, stran  
target 5' GGCAAUGGCUGAUGAAUCAA 3'

query 3' CCGUUACCGACUACUUAGAU 5'  
query=miR3703, target=R03G\_00332, score=3.5, range=378-397, stran  
target 5' GGCAAUGGCUGAAGAAUUUG 3'

query 3' CCGUUACCGACUACUUAGAU 5'  
query=miR3703, target=R03G\_05557, score=3.5, range=969-988, stran  
target 5' UUGGAUGGCUGAUGAAUCUA 3'

query 3' CCGUUACCGACUACUUAGAU 5'  
query=miR3703, target=R03G\_10411, score=3.5, range=1855-1873, str  
target 5' GAUAGU-GCUGAUGAAUCUG 3'

query 3' CCGUUACCGACUACUUAGAU 5'  
query=miR3703, target=R03G\_08231, score=4, range=1242-1261, stran  
target 5' GGCACUAGCUGAUAAAUCUA 3'

query 3' CCGUUACCGACUACUUAGAU 5'  
query=miR3703, target=R03G\_01507, score=4, range=1139-1158, stran  
target 5' GGAAAAGGCAGAUGAAUCUA 3'

query 3' CCGUUACCGACUACUUAGAU 5'  
query=miR3703, target=R03G\_09337, score=4, range=375-393, strand=  
target 5' GAUAA-AGCUGAUGAAUCUG 3'

query 3' CCGUUACCGACUACUUAGAU 5'  
query=miR7543, target=R03G\_14371, score=0, range=626-645, strand=  
target 5' UUGUCAACAUGUAUAUGAA 3'

query 3' AACAGUUUGUACAUAUACUU 5'  
query=miR7543, target=R03G\_00716, score=0, range=611-630, strand=  
target 5' UUGUCAACAUGUAUAUGAA 3'

query 3' AACAGUUUGUACAUAUACUU 5'  
query=miR7543, target=R03G\_12320, score=1, range=578-597, strand=  
target 5' UUGUCAAGCAUGUAUAUGAA 3'

query 3' AACAGUUUGUACAUAUACUU 5'  
query=miR7543, target=R03G\_05704, score=1, range=578-597, strand=  
target 5' UUGUCAAGCAUGUAUAUGAA 3'

query 3' AACAGUUUGUACAUAUACUU 5'  
query=miR7543, target=R03G\_13908, score=1, range=461-480, strand=  
target 5' UUGUCAAGCAUGUAUAUGAA 3'  
.....  
query 3' AACAGUUUGUACAUAUACUU 5'  
query=miR7543, target=R03G\_01392, score=1, range=89-108, strand=1  
target 5' UUGUCAAGCAUGUAUAUGAA 3'  
.....  
query 3' AACAGUUUGUACAUAUACUU 5'  
query=miR7543, target=R03G\_10438, score=2, range=170-189, strand=  
target 5' UUGACAAGCAUGUAUAUGAA 3'  
... ..  
query 3' AACAGUUUGUACAUAUACUU 5'  
query=miR7543, target=R03G\_02935, score=2, range=191-210, strand=  
target 5' UUGCCAAGCAUGUAUAUGAA 3'  
... ..  
query 3' AACAGUUUGUACAUAUACUU 5'  
query=miR7543, target=R03G\_15644, score=3, range=1808-1826, stran  
target 5' UUAUC-AACAUGUGUAUGAA 3'  
.. : ..  
query 3' AACAGUUUGUACAUAUACUU 5'  
query=miR7543, target=R03G\_15849, score=3, range=474-493, strand=  
target 5' UUAUCAAACUUGUAUAUGAA 3'  
.. : ..  
query 3' AACAGUUUGUACAUAUACUU 5'  
query=miR7543, target=R03G\_15182, score=3, range=572-590, strand=  
target 5' UUUUCAACAUGUAU-UGAA 3'  
.. : ..  
query 3' AACAGUUUGUACAUAUACUU 5'  
query=miR7543, target=R03G\_08601, score=4, range=187-206, strand=  
target 5' GUGUUAACAUGUUUAUGAG 3'  
.....  
query 3' AACAGUUUGUACAUAUACUU 5'  
query=miR7543, target=R03G\_13867, score=4, range=994-1013, strand  
target 5' UACUUGAACAUUGUAUGUGAA 3'  
: ..  
query 3' AACAGUUUGUACAUAUACUU 5'  
query=miR7543, target=R03G\_04239, score=4, range=3170-3189, stran  
target 5' UUGAAAAUAUGUAUAUGAU 3'  
... ..  
query 3' AACAGUUUGUACAUAUACUU 5'  
query=miR7543, target=R03G\_00829, score=4, range=125-144, strand=  
target 5' UUGGAAAACAAGUAUAUGAA 3'  
... ..  
query 3' AACAGUUUGUACAUAUACUU 5'



target 5' UUUCAUAAUCAAAAGUCAUAAACA 3'  
:..:: :..... ::  
query 3' AGGGU-UUAGUUUCAGUAUUCGU 5'  
query=miR1172.1, target=R03G\_00600, score=1, range=858-879, stran  
target 5' CUCCUUUGCUGCUGCAAUCCA 3'  
:..... ::  
query 3' GAGGAAACGACGACGUUUAGGA 5'  
query=miR1172.1, target=R03G\_16901, score=3.5, range=1053-1074,  
strand=1  
target 5' UUCCUUUGCUGCUGCCAAUCCA 3'  
.::::: :::::  
query 3' GAGGAAACGACGACGUUUAGGA 5'  
query=miR1172.1, target=R03G\_16917, score=3.5, range=1059-1080,  
strand=1  
target 5' UUCCUUUGCUGCUGCCAAUCCA 3'  
.::::: :::::  
query 3' GAGGAAACGACGACGUUUAGGA 5'  
query=miR1172.1, target=R03G\_01717, score=3.5, range=1050-1071,  
strand=1  
target 5' UUCCUUUGCUGCUGCCAAUCCA 3'  
.::::: :::::  
query 3' GAGGAAACGACGACGUUUAGGA 5'  
query=miR1172.1, target=R03G\_12011, score=3.5, range=1047-1068,  
strand=1  
target 5' UUCCUUUGCUGCUGCCAAUCCA 3'  
.::::: :::::  
query 3' GAGGAAACGACGACGUUUAGGA 5'  
query=miR1172.1, target=R03G\_02817, score=3.5, range=1047-1068,  
strand=1  
target 5' UUCCUUUGCUGCUGCCAAUCCA 3'  
.::::: :::::  
query 3' GAGGAAACGACGACGUUUAGGA 5'  
query=miR1172.1, target=R03G\_17433, score=3.5, range=1044-1065,  
strand=1  
target 5' UUCCUUUGCUGCUGCCAAUCCA 3'  
.::::: :::::  
query 3' GAGGAAACGACGACGUUUAGGA 5'  
query=miR1172.1, target=R03G\_07115, score=3.5, range=1002-1023,  
strand=1  
target 5' CUCUUUUGCUGCUGCUAAUCCC 3'  
:..... :::::  
query 3' GAGGAAACGACGACGUUUAGGA 5'  
query=miR1172.1, target=R03G\_16743, score=3.5, range=1005-1026,  
strand=1  
target 5' UUCCUUUGCUGCUGCCAAUCCA 3'

.: :  
 query 3' GAGGAAACGACGACGUUUAGGA 5'  
 query=miR1172.1, target=R03G\_07692, score=3.5, range=981-1002,  
 strand=1  
 target 5' UCCUUUGCUGCUGCCAAUCCA 3'  
 .: :  
 query 3' GAGGAAACGACGACGUUUAGGA 5'  
 query=miR1172.1, target=R03G\_04659, score=3.5, range=981-1002,  
 strand=1  
 target 5' UCCUUUGCUGCUGCCAAUCCA 3'  
 .: :  
 query 3' GAGGAAACGACGACGUUUAGGA 5'  
 query=miR1172.1, target=R03G\_15879, score=3.5, range=966-987, str  
 target 5' UCCUUUGCUGCUGCCAAUCCA 3'  
 .: :  
 query 3' GAGGAAACGACGACGUUUAGGA 5'  
 query=miR1172.1, target=R03G\_10043, score=3.5, range=954-975, str  
 target 5' UCCUUUGCUGCUGCCAAUCCA 3'  
 .: :  
 query 3' GAGGAAACGACGACGUUUAGGA 5'  
 query=miR1172.1, target=R03G\_12078, score=3.5, range=747-768, str  
 target 5' UCCUUUGCUGCUGCCAAUCCA 3'  
 .: :  
 query 3' GAGGAAACGACGACGUUUAGGA 5'  
 query=miR1172.1, target=R03G\_12975, score=3.5, range=345-366, str  
 target 5' UCCUUUGCUGCUGCCAAUCCA 3'  
 .: :  
 query 3' GAGGAAACGACGACGUUUAGGA 5'  
 query=miR1172.1, target=R03G\_05907, score=3.5, range=261-282, str  
 target 5' UCCUUUGCUGCUGCCAAUCCA 3'  
 .: :  
 query 3' GAGGAAACGACGACGUUUAGGA 5'  
 query=miR1172.1, target=R03G\_12645, score=3.5, range=219-240, str  
 target 5' UCCUUUGCUGCUGCCAAUCCA 3'  
 .: :  
 query 3' GAGGAAACGACGACGUUUAGGA 5'  
 query=miR1172.1, target=R03G\_15581, score=3.5, range=216-237, str  
 target 5' UCCUUUGCUGCUGCCAAUCCA 3'  
 .: :  
 query 3' GAGGAAACGACGACGUUUAGGA 5'  
 query=miR1172.1, target=R03G\_01325, score=3.5, range=156-177, str  
 target 5' UCCUUUGCUGCUGCCAAUCCA 3'  
 .: :  
 query 3' GAGGAAACGACGACGUUUAGGA 5'  
 query=miR5080, target=R03G\_09180, score=0, range=1098-1119, stran



.....  
query 3' GAAGCUGUAUGGGGUAUU 5'  
query=miR5022, target=R03G\_12104, score=4, range=449-466, strand=  
target 5' CUUCGACAGGCUCCAUUA 3'  
.....  
query 3' GAAGCUGUAUGGGGUAUU 5'  
query=miR5022, target=R03G\_10150, score=4, range=789-806, strand=  
target 5' ACUCCACAUACCCCAUUC 3'  
:: .....  
query 3' GAAGCUGUAUGGGGUAUU 5'  
query=miR5022, target=R03G\_16088, score=4, range=854-870, strand=  
target 5' UAUUGA-AUACCCCAUUA 3'  
. .:: .....  
query 3' GAAGCUGUAUGGGGUAUU 5'  
query=miR5022, target=R03G\_16316, score=4, range=87-104, strand=1  
target 5' CUUGAACAUACCCGAUUA 3'  
:: .....  
query 3' GAAGCUGUAUGGGGUAUU 5'  
query=miR5022, target=R03G\_03007, score=4, range=1043-1060, stran  
target 5' CUUCCAUAUAUCCAUA 3'  
:::: .....  
query 3' GAAGCUGUAUGGGGUAUU 5'  
query=miR5022, target=R03G\_03499, score=4, range=486-503, strand=  
target 5' GUUGGACAUACUUCAUUA 3'  
:: .....  
query 3' GAAGCUGUAUGGGGUAUU 5'  
query=miR5022, target=R03G\_16153, score=4, range=874-892, strand=  
target 5' GUUUGACAUAGCCCAUUG 3'  
.....  
query 3' GAAGCUGUAU-GGGGUAUU 5'  
query=miR5022, target=R03G\_04215, score=4, range=131-147, strand=  
target 5' CUUC-ACGUAUCCAUA 3'  
:::: .....  
query 3' GAAGCUGUAUGGGGUAUU 5'  
query=miR5022, target=R03G\_00439, score=4, range=41-57, strand=-1  
target 5' CUUC-AUAUGCUCUCCAUA 3'  
:::: .....  
query 3' GAAGCUGUAUGGGGUAUU 5'  
query=miR5022, target=R03G\_17299, score=4, range=1004-1021, stran  
target 5' CCUCGUCAUACUCCAUA 3'  
: :: .....  
query 3' GAAGCUGUAUGGGGUAUU 5'  
query=miR5022, target=R03G\_05376, score=4, range=237-254, strand=  
target 5' CUUCCACAUaucGCAUUA 3'  
:::: .....  
:::: ..:: ..::



query 3' GAAGCUGUAUGGGGUAUU 5'  
query=miR5022, target=R03G\_10249, score=4, range=176-193, strand=  
target 5' CUUGAACAUUUCCAUA 3'  
::: :::::::::::::::  
query 3' GAAGCUGUAUGGGGUAUU 5'  
query=miR5022, target=R03G\_00409, score=4, range=903-919, strand=  
target 5' CUUC-ACAUAUCUCAUUU 3'  
:::: :::::::::::::::  
query 3' GAAGCUGUAUGGGGUAUU 5'  
query=miR5022, target=R03G\_04533, score=4, range=3521-3538, stran  
target 5' CUUGUACAUAUCCCAUUU 3'  
::: :::::::::::::::  
query 3' GAAGCUGUAUGGGGUAUU 5'  
query=miR5022, target=R03G\_15103, score=4, range=2208-2226, stran  
target 5' CCUCGACAUGCCGCCAUUA 3'  
: :::::::::::::::  
query 3' GAAGCUGUAUGG-GGUAUU 5'  
query=miR5037c, target=R03G\_17063, score=3, range=731-747, strand  
target 5' CGGG-CCAAACUUCAACU 3'  
:::: ::::::: :::::::::::  
query 3' GCCCGGGUUUCAAGUUGA 5'  
query=miR5037c, target=R03G\_17385, score=3.5, range=288-305, stra  
target 5' UGUGCCCAAAGUUAACU 3'  
.: ::::::::::::::: :::::::  
query 3' GCCCGGGUUUCAAGUUGA 5'  
query=miR5037c, target=R03G\_11771, score=3.5, range=288-305, stra  
target 5' UGUGCCCAAAGUUAACU 3'  
.: ::::::::::::::: :::::::  
query 3' GCCCGGGUUUCAAGUUGA 5'  
query=miR5037c, target=R03G\_12009, score=3.5, range=288-305, stra  
target 5' UGUGCCCAAAGUUAACU 3'  
.: ::::::::::::::: :::::::  
query 3' GCCCGGGUUUCAAGUUGA 5'  
query=miR5037c, target=R03G\_09940, score=3.5, range=288-305, stra  
target 5' UGUGCCCAAAGUUAACU 3'  
.: ::::::::::::::: :::::::  
query 3' GCCCGGGUUUCAAGUUGA 5'  
query=miR5037c, target=R03G\_17358, score=3.5, range=288-305, stra  
target 5' UGUGCCCAAAGUUAACU 3'  
.: ::::::::::::::: :::::::  
query 3' GCCCGGGUUUCAAGUUGA 5'  
query=miR5037c, target=R03G\_12169, score=3.5, range=288-305, stra  
target 5' UGUGCCCAAAGUUAACU 3'  
.: ::::::::::::::: :::::::  
query 3' GCCCGGGUUUCAAGUUGA 5'





```
:: :::::::::: :::::
query 3' GCCCGGGUUUCAAGUUGA 5'
query=miR5037c, target=R03G_14710, score=4, range=288-305, strand
target 5' UGUGUCCAAAGUUAACU 3'
.: :::::::::: :::::
query 3' GCCCGGGUUUCAAGUUGA 5'
query=miR5037c, target=R03G_04526, score=4, range=1389-1406, stra
target 5' UGGAUCCAAAGUUGAACU 3'
.:: :::::::::: :::::
query 3' GCCCGGGUUUCAAGUUGA 5'
query=miR5037c, target=R03G_01349, score=4, range=690-707, strand
target 5' GGAACUCAAGUUCAACU 3'
: :::::::::::::::
query 3' GCCCGGGUUUCAAGUUGA 5'
query=miR5037c, target=R03G_09687, score=4, range=1060-1076, stra
target 5' CUGG-CCGAAGUUCAACG 3'
: :: :::::::::::::::
query 3' GCCCGGGUUUCAAGUUGA 5'
query=miR5037c, target=R03G_13223, score=4, range=972-989, strand
target 5' CAAGGCCAAAGUUCAACC 3'
: : :::::::::::::::
query 3' GCCCGGGUUUCAAGUUGA 5'
query=miR5037c, target=R03G_04124, score=4, range=972-989, strand
target 5' CAAGGCCAAAGUUCAACC 3'
: : :::::::::::::::
query 3' GCCCGGGUUUCAAGUUGA 5'
query=miR5037c, target=R03G_13596, score=4, range=520-537, strand
target 5' CUGUCCCAAAGUUCGAUU 3'
: : :::::::::::::::
query 3' GCCCGGGUUUCAAGUUGA 5'
query=miR396a-3p, target=R03G_09454, score=2, range=2269-2288,
strand=-1
target 5' UUUUCACAGCUUUGUUGAAC 3'
:.....:
query 3' AAGGGUGUCGAAAUAACUUG 5'
query=miR396a-3p, target=R03G_15072, score=3, range=1209-1227,
strand=1
target 5' UGCCCA-AGCUUUGUUGAAC 3'
: :::: :::::::::::::::
query 3' AAGGGUGUCGAAAUAACUUG 5'
query=miR396a-3p, target=R03G_02514, score=3.5, range=452-471,
strand=1
target 5' UUUUCACAGGUUUUAUUGAAU 3'
:.....:
query 3' AAGGGUGUCGAAAUAACUUG 5'
```

query=miR396a-3p, target=R03G\_04854, score=3.5, range=690-709,  
strand=-1  
target 5' CAUCUAUAGCUUUUAUUGAAC 3'  
.....  
query 3' AAGGGUGUCGAAAUAACUUG 5'  
query=miR396a-3p, target=R03G\_11676, score=4, range=1413-1432,  
strand=1  
target 5' UAAUCACAGUUUUUAUUGAAU 3'  
: .....  
query 3' AAGGGUGUCGAAAUAACUUG 5'  
query=miR396a-3p, target=R03G\_06667, score=4, range=475-493, stra  
target 5' AUACC-CAGUUUUUAUUGAAC 3'  
: :: .....  
query 3' AAGGGUGUCGAAAUAACUUG 5'  
query=miR4221, target=R03G\_04030, score=0, range=1211-1233, stran  
target 5' UUUCCUACCUUUUGAACCUCUUA 3'  
.....  
query 3' AAAGGAUGGAAAACUUGGAGAAU 5'  
query=miR4221, target=R03G\_05627, score=0, range=104-126, strand=  
target 5' UUUCCUACCUUUUGAACCUCUUA 3'  
.....  
query 3' AAAGGAUGGAAAACUUGGAGAAU 5'  
query=miR4221, target=R03G\_09361, score=0.5, range=890-912, stran  
target 5' UUUCCUAUCUUUUGAACCUCUUA 3'  
.....  
query 3' AAAGGAUGGAAAACUUGGAGAAU 5'  
query=miR4221, target=R03G\_12138, score=0.5, range=845-867, stran  
target 5' UUUCCUAUCUUUUGAACCUCUUA 3'  
.....  
query 3' AAAGGAUGGAAAACUUGGAGAAU 5'  
query=miR4221, target=R03G\_05034, score=4, range=158-179, strand=  
target 5' UUUUCU-CUUUUUGAGCCUCUUU 3'  
.....  
query 3' AAAGGAUGGAAAACUUGGAGAAU 5'  
query=miR156i, target=R03G\_11952, score=0, range=2971-2991, stran  
target 5' CUGCUGUCUUCUUCUGUCCA 3'  
.....  
query 3' GACGACAGAAGAAGACAAGGU 5'  
query=miR156i, target=R03G\_12964, score=0, range=2593-2613, stran  
target 5' CUGCUGUCUUCUUCUGUCCA 3'  
.....  
query 3' GACGACAGAAGAAGACAAGGU 5'  
query=miR156i, target=R03G\_13746, score=0, range=1447-1467, stran  
target 5' CUGCUGUCUUCUUCUGUCCA 3'  
.....

query 3' GACGACAGAAGAAGACAAGGU 5'  
query=miR156i, target=R03G\_00686, score=0, range=316-336, strand=  
target 5' CUGCUGUCUUCUUCUGUUCCA 3'  
.....  
query 3' GACGACAGAAGAAGACAAGGU 5'  
query=miR156i, target=R03G\_08024, score=3, range=2-22, strand=-1  
target 5' AUUCUGUCUUCUUUUGUUCCA 3'  
: .....  
query 3' GACGACAGAAGAAGACAAGGU 5'  
query=miR156i, target=R03G\_02682, score=3.5, range=1016-1036, str  
target 5' CUGGUGCUUUCUUUUGUUCCA 3'  
...: .....  
query 3' GACGACAGAAGAAGACAAGGU 5'  
query=miR156i, target=R03G\_15288, score=3.5, range=1016-1036, str  
target 5' CUGGUGCUUUCUUUUGUUCCA 3'  
...: .....  
query 3' GACGACAGAAGAAGACAAGGU 5'  
query=miR156i, target=R03G\_07729, score=3.5, range=785-805, stran  
target 5' CUGGUGCUUUCUUUUGUUCCA 3'  
...: .....  
query 3' GACGACAGAAGAAGACAAGGU 5'  
query=miR156i, target=R03G\_10263, score=3.5, range=21-41, strand=  
target 5' UUGUCGUUUUCUUCUGUUUCA 3'  
...: .....  
query 3' GACGACAGAAGAAGACAAGGU 5'  
query=miR156i, target=R03G\_16684, score=3.5, range=578-599, stran  
target 5' CUGUUAUCUUCUUCUGUUCCA 3'  
...: .....  
query 3' GACGACAGAAGAA-GACAAGGU 5'  
query=miR156i, target=R03G\_11120, score=3.5, range=879-899, stran  
target 5' CUACCGUUUUCUUCUGUUUCA 3'  
::: .....  
query 3' GACGACAGAAGAAGACAAGGU 5'  
query=miR156i, target=R03G\_06158, score=3.5, range=2058-2077,  
strand=-1  
target 5' UGGCU-UCUUCUUCUGUUUCA 3'  
. ::: .....  
query 3' GACGACAGAAGAAGACAAGGU 5'  
query=miR156i, target=R03G\_11630, score=3.5, range=242-261, stran  
target 5' CUGUUGU-UUCUUUUGUUCCU 3'  
.....  
query 3' GACGACAGAAGAAGACAAGGU 5'  
query=miR156i, target=R03G\_16901, score=4, range=188-207, strand=  
target 5' CUGCU-UCUGCUUCUGUUCCU 3'  
.....

query 3' GACGACAGAAGAAGACAAGGU 5'  
query=miR156i, target=R03G\_07738, score=4, range=179-198, strand=  
target 5' CUGCU-UCUGCUUCUGUUCCU 3'  
::::: ::: ::::::::::::::  
query 3' GACGACAGAAGAAGACAAGGU 5'  
query=miR156i, target=R03G\_11236, score=4, range=179-198, strand=  
target 5' CUGCU-UCUGCUUCUGUUCCU 3'  
::::: ::: ::::::::::::::  
query 3' GACGACAGAAGAAGACAAGGU 5'  
query=miR156i, target=R03G\_11537, score=4, range=179-198, strand=  
target 5' CUGCU-UCUGCUUCUGUUCCU 3'  
::::: ::: ::::::::::::::  
query 3' GACGACAGAAGAAGACAAGGU 5'  
query=miR156i, target=R03G\_17248, score=4, range=167-186, strand=  
target 5' CUGCU-UCUGCUUCUGUUCCU 3'  
::::: ::: ::::::::::::::  
query 3' GACGACAGAAGAAGACAAGGU 5'  
query=miR156i, target=R03G\_16917, score=4, range=194-213, strand=  
target 5' CUGCU-UCUGCUUCUGUUCCU 3'  
::::: ::: ::::::::::::::  
query 3' GACGACAGAAGAAGACAAGGU 5'  
query=miR156i, target=R03G\_01717, score=4, range=197-216, strand=  
target 5' CUGCU-UCUGCUUCUGUUCCU 3'  
::::: ::: ::::::::::::::  
query 3' GACGACAGAAGAAGACAAGGU 5'  
query=miR156i, target=R03G\_12011, score=4, range=194-213, strand=  
target 5' CUGCU-UCUGCUUCUGUUCCU 3'  
::::: ::: ::::::::::::::  
query 3' GACGACAGAAGAAGACAAGGU 5'  
query=miR156i, target=R03G\_02817, score=4, range=197-216, strand=  
target 5' CUGCU-UCUGCUUCUGUUCCU 3'  
::::: ::: ::::::::::::::  
query 3' GACGACAGAAGAAGACAAGGU 5'  
query=miR156i, target=R03G\_15897, score=4, range=137-156, strand=  
target 5' CUGCU-UCUGCUUCUGUUCCU 3'  
::::: ::: ::::::::::::::  
query 3' GACGACAGAAGAAGACAAGGU 5'  
query=miR156i, target=R03G\_04211, score=4, range=137-156, strand=  
target 5' CUGCU-UCUGCUUCUGUUCCU 3'  
::::: ::: ::::::::::::::  
query 3' GACGACAGAAGAAGACAAGGU 5'  
query=miR156i, target=R03G\_06730, score=4, range=137-156, strand=  
target 5' CUGCU-UCUGCUUCUGUUCCU 3'  
::::: ::: ::::::::::::::  
query 3' GACGACAGAAGAAGACAAGGU 5'

query=miR156i, target=R03G\_09602, score=4, range=137-156, strand=  
target 5' CUGCU-UCUGCUUCUGUUCCU 3'  
::::: ::: ::::::::::::::  
query 3' GACGACAGAAGAAGACAAGGU 5'  
query=miR156i, target=R03G\_09929, score=4, range=137-156, strand=  
target 5' CUGCU-UCUGCUUCUGUUCCU 3'  
::::: ::: ::::::::::::::  
query 3' GACGACAGAAGAAGACAAGGU 5'  
query=miR156i, target=R03G\_07696, score=4, range=137-156, strand=  
target 5' CUGCU-UCUGCUUCUGUUCCU 3'  
::::: ::: ::::::::::::::  
query 3' GACGACAGAAGAAGACAAGGU 5'  
query=miR156i, target=R03G\_07306, score=4, range=137-156, strand=  
target 5' CUGCU-UCUGCUUCUGUUCCU 3'  
::::: ::: ::::::::::::::  
query 3' GACGACAGAAGAAGACAAGGU 5'  
query=miR156i, target=R03G\_14551, score=4, range=137-156, strand=  
target 5' CUGCU-UCUGCUUCUGUUCCU 3'  
::::: ::: ::::::::::::::  
query 3' GACGACAGAAGAAGACAAGGU 5'  
query=miR156i, target=R03G\_17433, score=4, range=191-210, strand=  
target 5' CUGCU-UCUGCUUCUGUUCCU 3'  
::::: ::: ::::::::::::::  
query 3' GACGACAGAAGAAGACAAGGU 5'  
query=miR156i, target=R03G\_07981, score=4, range=137-156, strand=  
target 5' CUGCU-UCUGCUUCUGUUCCU 3'  
::::: ::: ::::::::::::::  
query 3' GACGACAGAAGAAGACAAGGU 5'  
query=miR156i, target=R03G\_07720, score=4, range=137-156, strand=  
target 5' CUGCU-UCUGCUUCUGUUCCU 3'  
::::: ::: ::::::::::::::  
query 3' GACGACAGAAGAAGACAAGGU 5'  
query=miR156i, target=R03G\_10775, score=4, range=167-186, strand=  
target 5' CUGCU-UCUGCUUCUGUUCCU 3'  
::::: ::: ::::::::::::::  
query 3' GACGACAGAAGAAGACAAGGU 5'  
query=miR156i, target=R03G\_16743, score=4, range=140-159, strand=  
target 5' CUGCU-UCUGCUUCUGUUCCU 3'  
::::: ::: ::::::::::::::  
query 3' GACGACAGAAGAAGACAAGGU 5'  
query=miR156i, target=R03G\_03584, score=4, range=95-114, strand=1  
target 5' CUGCU-UCUGCUUCUGUUCCU 3'  
::::: ::: ::::::::::::::  
query 3' GACGACAGAAGAAGACAAGGU 5'  
query=miR156i, target=R03G\_07692, score=4, range=128-147, strand=





::::: ::: ::::::::::::::  
query 3' GACGACAGAAGAAGACAAGGU 5'  
query=miR156i, target=R03G\_12668, score=4, range=203-222, strand=  
target 5' CUGCU-UCUUCUUCUGCUCCU 3'  
::::: :::::::::::::: :::  
query 3' GACGACAGAAGAAGACAAGGU 5'  
query=miR156i, target=R03G\_05425, score=4, range=167-186, strand=  
target 5' CUGCU-UCUGCUUCUGUCCU 3'  
::::: ::: ::::::::::::::  
query 3' GACGACAGAAGAAGACAAGGU 5'  
query=miR156i, target=R03G\_16137, score=4, range=161-180, strand=  
target 5' CUGCU-UCUGCUUCUGUCCU 3'  
::::: ::: ::::::::::::::  
query 3' GACGACAGAAGAAGACAAGGU 5'  
query=miR156i, target=R03G\_10218, score=4, range=167-186, strand=  
target 5' CUGCU-UCUGCUUCUGUCCU 3'  
::::: ::: ::::::::::::::  
query 3' GACGACAGAAGAAGACAAGGU 5'  
query=miR156i, target=R03G\_11543, score=4, range=194-213, strand=  
target 5' CUGCU-UCUGCUUCUGUCCU 3'  
::::: ::: ::::::::::::::  
query 3' GACGACAGAAGAAGACAAGGU 5'  
query=miR156i, target=R03G\_14553, score=4, range=194-213, strand=  
target 5' CUGCU-UCUGCUUCUGUCCU 3'  
::::: ::: ::::::::::::::  
query 3' GACGACAGAAGAAGACAAGGU 5'  
query=miR156i, target=R03G\_12962, score=4, range=290-309, strand=  
target 5' CUGCU-UCUUCUUCUGCUCCU 3'  
::::: :::::::::::::: :::  
query 3' GACGACAGAAGAAGACAAGGU 5'  
query=miR156i, target=R03G\_16748, score=4, range=137-156, strand=  
target 5' CUGCU-UCUGCUUCUGUCCU 3'  
::::: ::: ::::::::::::::  
query 3' GACGACAGAAGAAGACAAGGU 5'  
query=miR156i, target=R03G\_15887, score=4, range=218-237, strand=  
target 5' CUGCU-UCUGCUUCUGUCCU 3'  
::::: ::: ::::::::::::::  
query 3' GACGACAGAAGAAGACAAGGU 5'  
query=miR156i, target=R03G\_02228, score=4, range=137-156, strand=  
target 5' CUGCU-UCUGCUUCUGUCCU 3'  
::::: ::: ::::::::::::::  
query 3' GACGACAGAAGAAGACAAGGU 5'  
query=miR156i, target=R03G\_01192, score=4, range=131-150, strand=  
target 5' CUGCU-UCUGCUUCUGUCCU 3'  
::::: ::: ::::::::::::::



query=miR156i, target=R03G\_15932, score=4, range=1442-1461, stran  
target 5' CUUCU-UCUUUUUCUGUCCU 3'  
:: :: ::::::::::::::  
query 3' GACGACAGAAGAAGACAAGGU 5'  
query=miR156i, target=R03G\_06191, score=4, range=937-956, strand=  
target 5' CUUCUUUCUUCUUCUG-UCCA 3'  
:: :: :::::::::::::: ::::  
query 3' GACGACAGAAGAAGACAAGGU 5'  
query=miR4374b, target=R03G\_17462, score=0, range=964-983, strand  
target 5' CUCACAACCGUCUUUGAAGA 3'  
::::::::::::::::::::  
query 3' GAGUGUUGGCAGAAACUUCU 5'  
query=miR4374b, target=R03G\_17451, score=0, range=73-92, strand=1  
target 5' CUCACAACCGUCUUUGAAGA 3'  
::::::::::::::::::::  
query 3' GAGUGUUGGCAGAAACUUCU 5'  
query=miR4374b, target=R03G\_13914, score=0, range=832-851, strand  
target 5' CUCACAACCGUCUUUGAAGA 3'  
::::::::::::::::::::  
query 3' GAGUGUUGGCAGAAACUUCU 5'  
query=miR4374b, target=R03G\_12058, score=0, range=832-851, strand  
target 5' CUCACAACCGUCUUUGAAGA 3'  
::::::::::::::::::::  
query 3' GAGUGUUGGCAGAAACUUCU 5'  
query=miR4374b, target=R03G\_02233, score=0, range=361-380, strand  
target 5' CUCACAACCGUCUUUGAAGA 3'  
::::::::::::::::::::  
query 3' GAGUGUUGGCAGAAACUUCU 5'  
query=miR4374b, target=R03G\_14983, score=0, range=637-656, strand  
target 5' CUCACAACCGUCUUUGAAGA 3'  
::::::::::::::::::::  
query 3' GAGUGUUGGCAGAAACUUCU 5'  
query=miR4374b, target=R03G\_10801, score=0, range=637-656, strand  
target 5' CUCACAACCGUCUUUGAAGA 3'  
::::::::::::::::::::  
query 3' GAGUGUUGGCAGAAACUUCU 5'  
query=miR4374b, target=R03G\_09614, score=0, range=163-182, strand  
target 5' CUCACAACCGUCUUUGAAGA 3'  
::::::::::::::::::::  
query 3' GAGUGUUGGCAGAAACUUCU 5'  
query=miR4374b, target=R03G\_03583, score=2, range=637-656, strand  
target 5' CUCACAACAGUCUUUGAAGA 3'  
:::::::::: ::::::::::::::  
query 3' GAGUGUUGGCAGAAACUUCU 5'  
query=miR4374b, target=R03G\_12667, score=2, range=202-221, strand



target 5' CUCA-GGCCGUCUUUGAACA 3'  
:::: ..:: :  
query 3' GAGUGUUGGCAGAAACUUCU 5'  
query=miR4374b, target=R03G\_09089, score=4, range=1122-1140, strand=  
target 5' CUCA-GGCCGUCUUUGAACA 3'  
:::: ..:: :  
query 3' GAGUGUUGGCAGAAACUUCU 5'  
query=miR4374b, target=R03G\_15417, score=4, range=1371-1389, strand=  
target 5' CUCA-GGCCGUCUUUGAACA 3'  
:::: ..:: :  
query 3' GAGUGUUGGCAGAAACUUCU 5'  
query=miR4374b, target=R03G\_15078, score=4, range=1122-1140, strand=  
target 5' CUCA-GGCCGUCUUUGAACA 3'  
:::: ..:: :  
query 3' GAGUGUUGGCAGAAACUUCU 5'  
query=miR4374b, target=R03G\_09251, score=4, range=267-285, strand=  
target 5' CUCA-GGCCGUCUUUGAACA 3'  
:::: ..:: :  
query 3' GAGUGUUGGCAGAAACUUCU 5'  
query=miR4374b, target=R03G\_13414, score=4, range=99-117, strand=  
target 5' CUCA-GGCCGUCUUUGAACA 3'  
:::: ..:: :  
query 3' GAGUGUUGGCAGAAACUUCU 5'  
query=miR4374b, target=R03G\_14856, score=4, range=924-942, strand=  
target 5' CUCA-GGCCGUCUUUGAACA 3'  
:::: ..:: :  
query 3' GAGUGUUGGCAGAAACUUCU 5'  
query=miR4374b, target=R03G\_14875, score=4, range=924-942, strand=  
target 5' CUCA-GGCCGUCUUUGAACA 3'  
:::: ..:: :  
query 3' GAGUGUUGGCAGAAACUUCU 5'  
query=miR4374b, target=R03G\_15709, score=4, range=264-282, strand=  
target 5' CUCA-GGCCGUCUUUGAACA 3'  
:::: ..:: :  
query 3' GAGUGUUGGCAGAAACUUCU 5'  
query=miR4374b, target=R03G\_10584, score=4, range=747-765, strand=  
target 5' CUCA-GGCCGUCUUUGAACA 3'  
:::: ..:: :  
query 3' GAGUGUUGGCAGAAACUUCU 5'  
query=miR4374b, target=R03G\_14154, score=4, range=99-117, strand=  
target 5' CUCA-GGCCGUCUUUGAACA 3'  
:::: ..:: :  
query 3' GAGUGUUGGCAGAAACUUCU 5'  
query=miR826b, target=R03G\_15287, score=0, range=828-849, strand=  
target 5' AUUUUCAUCGAUGUCAAGACCA 3'

query 3' UAAAAGUAGCUACAGUUCUGGU 5'  
query=miR826b, target=R03G\_07134, score=0, range=273-294, strand=  
target 5' AUUUUCAUCGAUGUCAAGACCA 3'

query 3' UAAAAGUAGCUACAGUUCUGGU 5'  
query=miR826b, target=R03G\_13291, score=0, range=273-294, strand=  
target 5' AUUUUCAUCGAUGUCAAGACCA 3'

query 3' UAAAAGUAGCUACAGUUCUGGU 5'  
query=miR826b, target=R03G\_01722, score=0, range=294-315, strand=  
target 5' AUUUUCAUCGAUGUCAAGACCA 3'

query 3' UAAAAGUAGCUACAGUUCUGGU 5'  
query=miR826b, target=R03G\_02952, score=0, range=294-315, strand=  
target 5' AUUUUCAUCGAUGUCAAGACCA 3'

query 3' UAAAAGUAGCUACAGUUCUGGU 5'  
query=miR826b, target=R03G\_17431, score=0, range=261-282, strand=  
target 5' AUUUUCAUCGAUGUCAAGACCA 3'

query 3' UAAAAGUAGCUACAGUUCUGGU 5'  
query=miR826b, target=R03G\_17247, score=0, range=261-282, strand=  
target 5' AUUUUCAUCGAUGUCAAGACCA 3'

query 3' UAAAAGUAGCUACAGUUCUGGU 5'  
query=miR826b, target=R03G\_15165, score=0, range=261-282, strand=  
target 5' AUUUUCAUCGAUGUCAAGACCA 3'

query 3' UAAAAGUAGCUACAGUUCUGGU 5'  
query=miR826b, target=R03G\_10547, score=0, range=261-282, strand=  
target 5' AUUUUCAUCGAUGUCAAGACCA 3'

query 3' UAAAAGUAGCUACAGUUCUGGU 5'  
query=miR826b, target=R03G\_07127, score=0, range=261-282, strand=  
target 5' AUUUUCAUCGAUGUCAAGACCA 3'

query 3' UAAAAGUAGCUACAGUUCUGGU 5'  
query=miR826b, target=R03G\_09164, score=0, range=261-282, strand=  
target 5' AUUUUCAUCGAUGUCAAGACCA 3'

query 3' UAAAAGUAGCUACAGUUCUGGU 5'  
query=miR826b, target=R03G\_17323, score=0, range=261-282, strand=  
target 5' AUUUUCAUCGAUGUCAAGACCA 3'

query 3' UAAAAGUAGCUACAGUUCUGGU 5'  
query=miR826b, target=R03G\_17283, score=0, range=216-237, strand=  
target 5' AUUUUCAUCGAUGUCAAGACCA 3'  
.....  
query 3' UAAAAGUAGCUACAGUUCUGGU 5'  
query=miR826b, target=R03G\_12068, score=0, range=261-282, strand=  
target 5' AUUUUCAUCGAUGUCAAGACCA 3'  
.....  
query 3' UAAAAGUAGCUACAGUUCUGGU 5'  
query=miR826b, target=R03G\_17219, score=0, range=261-282, strand=  
target 5' AUUUUCAUCGAUGUCAAGACCA 3'  
.....  
query 3' UAAAAGUAGCUACAGUUCUGGU 5'  
query=miR826b, target=R03G\_14977, score=0, range=273-294, strand=  
target 5' AUUUUCAUCGAUGUCAAGACCA 3'  
.....  
query 3' UAAAAGUAGCUACAGUUCUGGU 5'  
query=miR826b, target=R03G\_16806, score=0, range=273-294, strand=  
target 5' AUUUUCAUCGAUGUCAAGACCA 3'  
.....  
query 3' UAAAAGUAGCUACAGUUCUGGU 5'  
query=miR826b, target=R03G\_14335, score=3, range=45-66, strand=-1  
target 5' AUCUUUUUUGAUGUCAAGACCA 3'  
:: :: .....  
query 3' UAAAAGUAGCUACAGUUCUGGU 5'  
query=miR826b, target=R03G\_14707, score=4, range=261-282, strand=  
target 5' AUUUUCAUCAAUUCAAGACCA 3'  
..... :: .....  
query 3' UAAAAGUAGCUACAGUUCUGGU 5'  
query=miR826b, target=R03G\_12006, score=4, range=261-282, strand=  
target 5' AUUUUCAUCAAUUCAAGACCA 3'  
..... :: .....  
query 3' UAAAAGUAGCUACAGUUCUGGU 5'  
query=miR826b, target=R03G\_16910, score=4, range=261-282, strand=  
target 5' AUUUUCAUCAAUUCAAGACCA 3'  
..... :: .....  
query 3' UAAAAGUAGCUACAGUUCUGGU 5'  
query=miR826b, target=R03G\_17245, score=4, range=261-282, strand=  
target 5' AUUUUCAUCAAUUCAAGACCA 3'  
..... :: .....  
query 3' UAAAAGUAGCUACAGUUCUGGU 5'  
query=miR826b, target=R03G\_11285, score=4, range=261-282, strand=  
target 5' AUUUUCAUCAAUUCAAGACCA 3'  
..... :: .....  
query 3' UAAAAGUAGCUACAGUUCUGGU 5'





target 5' GGUCAGACGAGACGAAAAUA 3'  
:.....  
query 3' CUGGUCUGCUCUGUUUUUAU 5'  
query=miR7800, target=R03G\_16545, score=2, range=437-456, strand=  
target 5' GGUCAGACGAGACGAAAAUA 3'  
:.....  
query 3' CUGGUCUGCUCUGUUUUUAU 5'  
query=miR7800, target=R03G\_00255, score=2, range=437-456, strand=  
target 5' GGUCAGACGAGACGAAAAUA 3'  
:.....  
query 3' CUGGUCUGCUCUGUUUUUAU 5'  
query=miR7800, target=R03G\_13266, score=2, range=215-234, strand=  
target 5' GGUCAGACGAGACGAAAAUA 3'  
:.....  
query 3' CUGGUCUGCUCUGUUUUUAU 5'  
query=miR7800, target=R03G\_13277, score=2, range=437-456, strand=  
target 5' GGUCAGACGAGACGAAAAUA 3'  
:.....  
query 3' CUGGUCUGCUCUGUUUUUAU 5'  
query=miR7800, target=R03G\_11266, score=2, range=260-279, strand=  
target 5' GGUCAGACGAGACGAAAAUA 3'  
:.....  
query 3' CUGGUCUGCUCUGUUUUUAU 5'  
query=miR7800, target=R03G\_07120, score=2, range=260-279, strand=  
target 5' GGUCAGACGAGACGAAAAUA 3'  
:.....  
query 3' CUGGUCUGCUCUGUUUUUAU 5'  
query=miR7800, target=R03G\_15001, score=2, range=260-279, strand=  
target 5' GGUCAGACGAGACGAAAAUA 3'  
:.....  
query 3' CUGGUCUGCUCUGUUUUUAU 5'  
query=miR7800, target=R03G\_11240, score=2, range=260-279, strand=  
target 5' GGUCAGACGAGACGAAAAUA 3'  
:.....  
query 3' CUGGUCUGCUCUGUUUUUAU 5'  
query=miR7800, target=R03G\_07031, score=2, range=437-456, strand=  
target 5' GGUCAGACGAGACAAAAAUC 3'  
:.....  
query 3' CUGGUCUGCUCUGUUUUUAU 5'  
query=miR7800, target=R03G\_16554, score=2, range=437-456, strand=  
target 5' GGUCAGACGAGACAAAAAUC 3'  
:.....  
query 3' CUGGUCUGCUCUGUUUUUAU 5'  
query=miR7800, target=R03G\_15146, score=2, range=317-336, strand=  
target 5' GGUCAGACGAGACAAAAAUC 3'

.....  
query 3' CUGGUCUGCUCUGUUUUUUAU 5'  
query=miR7800, target=R03G\_08842, score=2.5, range=437-456, stran  
target 5' GGUCGGACGAGACAAAAAUC 3'  
.....  
query 3' CUGGUCUGCUCUGUUUUUUAU 5'  
query=miR7800, target=R03G\_16363, score=2.5, range=437-456, stran  
target 5' GGUCGGACGAGACAAAAAUC 3'  
.....  
query 3' CUGGUCUGCUCUGUUUUUUAU 5'  
query=miR7800, target=R03G\_07688, score=3, range=437-456, strand=  
target 5' GGUCAGAUGAGACGAAAAUA 3'  
.....  
query 3' CUGGUCUGCUCUGUUUUUUAU 5'  
query=miR7800, target=R03G\_15575, score=3, range=260-279, strand=  
target 5' GGUCAACGAGACGAAAAUA 3'  
.....  
query 3' CUGGUCUGCUCUGUUUUUUAU 5'  
query=miR7800, target=R03G\_07877, score=3.5, range=215-234, stran  
target 5' GGUCGGAUGAGACAAAAAUC 3'  
.....  
query 3' CUGGUCUGCUCUGUUUUUUAU 5'  
query=miR7800, target=R03G\_13718, score=3.5, range=215-234, stran  
target 5' GGUCGGAUGAGACAAAAAUC 3'  
.....  
query 3' CUGGUCUGCUCUGUUUUUUAU 5'  
query=miR7800, target=R03G\_13147, score=3.5, range=215-234, stran  
target 5' GGUCGGAUGAGACAAAAAUC 3'  
.....  
query 3' CUGGUCUGCUCUGUUUUUUAU 5'  
query=miR7800, target=R03G\_03772, score=3.5, range=437-456, stran  
target 5' GGUCGGAUGAGACAAAAAUC 3'  
.....  
query 3' CUGGUCUGCUCUGUUUUUUAU 5'  
query=miR7800, target=R03G\_13733, score=3.5, range=215-234, stran  
target 5' GGUCGGAUGAGACAAAAAUC 3'  
.....  
query 3' CUGGUCUGCUCUGUUUUUUAU 5'  
query=miR7800, target=R03G\_17363, score=3.5, range=179-198, stran  
target 5' GGUCGGAUGAGACAAAAAUC 3'  
.....  
query 3' CUGGUCUGCUCUGUUUUUUAU 5'  
query=miR7800, target=R03G\_03113, score=3.5, range=179-198, stran  
target 5' GGUCGGAUGAGACAAAAAUC 3'  
.....

query 3' CUGGUCUGCUCUGUUUUUUAU 5'  
query=miR7800, target=R03G\_02844, score=3.5, range=215-234, stran  
target 5' GGUCGGAUGAGACAAAAAUC 3'  
.....  
query 3' CUGGUCUGCUCUGUUUUUUAU 5'  
query=miR7800, target=R03G\_03766, score=3.5, range=215-234, stran  
target 5' GGUCGGAUGAGACAAAAAUC 3'  
.....  
query 3' CUGGUCUGCUCUGUUUUUUAU 5'  
query=miR7800, target=R03G\_13137, score=3.5, range=437-456, stran  
target 5' GGUCGGAUGAGACAAAAAUC 3'  
.....  
query 3' CUGGUCUGCUCUGUUUUUUAU 5'  
query=miR7800, target=R03G\_01618, score=3.5, range=437-456, stran  
target 5' GGUCGGAUGAGACAAAAAUC 3'  
.....  
query 3' CUGGUCUGCUCUGUUUUUUAU 5'  
query=miR7800, target=R03G\_14150, score=4, range=118-137, strand=  
target 5' GACGAGAUGAGGCAAAGAU 3'  
::: .....  
query 3' CUGGUCUGCUCUGUUUUUUAU 5'  
query=miR7800, target=R03G\_03803, score=4, range=260-279, strand=  
target 5' GGUCAGAAGAGACGAAAAUA 3'  
.....  
query 3' CUGGUCUGCUCUGUUUUUUAU 5'  
query=miR7800, target=R03G\_13502, score=4, range=268-287, strand=  
target 5' GACCAGUCGAGAAAAGAAUA 3'  
.....  
query 3' CUGGUCUGCUCUGUUUUUUAU 5'  
query=miR7800, target=R03G\_00482, score=4, range=116-136, strand=  
target 5' GAACAGACGAGAUGAAAAUA 3'  
:: .....  
query 3' CUGGUCUGCUCUG-UUUUUUAU 5'  
query=miR7800, target=R03G\_15651, score=4, range=232-250, strand=  
target 5' GA-CAGACGAUACAAAAAUC 3'  
:: .....  
query 3' CUGGUCUGCUCUGUUUUUUAU 5'  
query=miR7800, target=R03G\_06934, score=4, range=1364-1384, stran  
target 5' GACCAGCAGAGACCAAAAAUA 3'  
.....  
query 3' CUGGUCUGCUCU-GUUUUUUAU 5'  
query=miR9759, target=R03G\_02835, score=0, range=188-209, strand=  
target 5' AUAAACUCGUACUUGCUUACUA 3'  
.....  
query 3' UAUUUGAGCAUGAACGAAUGAU 5'



target 5' CA-AAUUUCAACAUACAAAG 3'  
:: : .....

query 3' GUGUGGAAGUUGUAUGUUUU 5'  
query=miR857, target=R03G\_16060, score=3.5, range=930-949, strand  
target 5' CACAUCUUCAACAUCAAGU 3'  
.....

query 3' GUGUGGAAGUUGUAUGUUUU 5'  
query=miR857, target=R03G\_07199, score=3.5, range=152-170, strand  
target 5' UACG-UUUCGACAUACAAAA 3'  
. . . . .

query 3' GUGUGGAAGUUGUAUGUUUU 5'  
query=miR857, target=R03G\_01274, score=3.5, range=378-397, strand  
target 5' UAGCCCUUUAACAUACAAAA 3'  
. . : .....

query 3' GUGUGGAAGUUGUAUGUUUU 5'  
query=miR857, target=R03G\_03519, score=3.5, range=1670-1689, stra  
target 5' CACAUCAUCAGCAUAUAAAA 3'  
.....

query 3' GUGUGGAAGUUGUAUGUUUU 5'  
query=miR857, target=R03G\_03719, score=3.5, range=1586-1605, stra  
target 5' CACAUCGUCAGCAUAUAAAA 3'  
.....

query 3' GUGUGGAAGUUGUAUGUUUU 5'  
query=miR857, target=R03G\_00794, score=3.5, range=1586-1605, stra  
target 5' CACAUCGUCAGCAUAUAAAA 3'  
.....

query 3' GUGUGGAAGUUGUAUGUUUU 5'  
query=miR857, target=R03G\_08299, score=3.5, range=1232-1251, stra  
target 5' CACAUCGUCAGCAUAUAAAA 3'  
.....

query 3' GUGUGGAAGUUGUAUGUUUU 5'  
query=miR857, target=R03G\_06780, score=3.5, range=761-780, strand  
target 5' CACAUCAUCAGCAUACAAGA 3'  
.....

query 3' GUGUGGAAGUUGUAUGUUUU 5'  
query=miR857, target=R03G\_01914, score=3.5, range=785-804, strand  
target 5' AAUUUCUUCAACAUACAAAG 3'  
. . . ..

query 3' GUGUGGAAGUUGUAUGUUUU 5'  
query=miR857, target=R03G\_09731, score=3.5, range=1721-1740, stra  
target 5' UUCACCUUCAACAUCCAAAA 3'  
. : .....

query 3' GUGUGGAAGUUGUAUGUUUU 5'  
query=miR857, target=R03G\_10103, score=3.5, range=986-1005, stran  
target 5' CAAAUAUCAACAUACAAAA 3'



query 3' GUGUGGAAGUUGUAUGUUUU 5'  
query=miR6185, target=R03G\_13223, score=0, range=1206-1227, stran  
target 5' UACUGUUACCCGUGCUGCCAGA 3'  
.....  
query 3' AUGACAAUGGGCACGACGGUCU 5'  
query=miR6185, target=R03G\_04122, score=0, range=1206-1227, stran  
target 5' UACUGUUACCCGUGCUGCCAGA 3'  
.....  
query 3' AUGACAAUGGGCACGACGGUCU 5'  
query=miR6185, target=R03G\_13220, score=0, range=1206-1227, stran  
target 5' UACUGUUACCCGUGCUGCCAGA 3'  
.....  
query 3' AUGACAAUGGGCACGACGGUCU 5'  
query=miR6185, target=R03G\_04119, score=0, range=1206-1227, stran  
target 5' UACUGUUACCCGUGCUGCCAGA 3'  
.....  
query 3' AUGACAAUGGGCACGACGGUCU 5'  
query=miR1023e-3p, target=R03G\_17387, score=0, range=78-99, stran  
target 5' AUGCACUCCAACCCGUUCCCA 3'  
.....  
query 3' UACGUGAGGUUGGGCAAAGGGU 5'  
query=miR1023e-3p, target=R03G\_01205, score=0, range=78-99, stran  
target 5' AUGCACUCCAACCCGUUCCCA 3'  
.....  
query 3' UACGUGAGGUUGGGCAAAGGGU 5'  
query=miR1023e-3p, target=R03G\_00238, score=0, range=78-99, stran  
target 5' AUGCACUCCAACCCGUUCCCA 3'  
.....  
query 3' UACGUGAGGUUGGGCAAAGGGU 5'  
query=miR1023e-3p, target=R03G\_10795, score=0, range=78-99, stran  
target 5' AUGCACUCCAACCCGUUCCCA 3'  
.....  
query 3' UACGUGAGGUUGGGCAAAGGGU 5'  
query=miR1023e-3p, target=R03G\_16698, score=0, range=78-99, stran  
target 5' AUGCACUCCAACCCGUUCCCA 3'  
.....  
query 3' UACGUGAGGUUGGGCAAAGGGU 5'  
query=miR1023e-3p, target=R03G\_05521, score=0, range=78-99, stran  
target 5' AUGCACUCCAACCCGUUCCCA 3'  
.....  
query 3' UACGUGAGGUUGGGCAAAGGGU 5'  
query=miR1023e-3p, target=R03G\_12539, score=0.5, range=78-99,  
strand=-1  
target 5' AUGCACUCCAACCCGUUCCCA 3'  
.....



query 3' UACGUGAGGUUGGGCAAAGGGU 5'  
query=miR1023e-3p, target=R03G\_09494, score=0.5, range=78-99,  
strand=-1  
target 5' AUGCACUUCAACCCGUUCCCA 3'  
::::::::::::::::::::::::::

query 3' UACGUGAGGUUGGGCAAAGGGU 5'  
query=miR1023e-3p, target=R03G\_09498, score=0.5, range=78-99,  
strand=-1  
target 5' AUGCACUUCAACCCGUUCCCA 3'  
::::::::::::::::::::::::::

query 3' UACGUGAGGUUGGGCAAAGGGU 5'  
query=miR1023e-3p, target=R03G\_12542, score=0.5, range=78-99,  
strand=-1  
target 5' AUGCACUUCAACCCGUUCCCA 3'  
::::::::::::::::::::::::::

query 3' UACGUGAGGUUGGGCAAAGGGU 5'  
query=miR1023e-3p, target=R03G\_05640, score=1, range=78-99, stran  
target 5' AUGCACUCCAACUCGUUCCCA 3'  
::::::::::::::::::::::::::

query 3' UACGUGAGGUUGGGCAAAGGGU 5'  
query=miR1023e-3p, target=R03G\_17416, score=1, range=78-99, stran  
target 5' AUGCACUCCAACUCGUUCCCA 3'  
::::::::::::::::::::::::::

query 3' UACGUGAGGUUGGGCAAAGGGU 5'  
query=miR1023e-3p, target=R03G\_16742, score=1, range=78-99, stran  
target 5' AUGCACUCCAACUCGUUCCCA 3'  
::::::::::::::::::::::::::

query 3' UACGUGAGGUUGGGCAAAGGGU 5'  
query=miR1023e-3p, target=R03G\_17291, score=1, range=78-99, stran  
target 5' AUGCACUCCAACUCGUUCCCA 3'  
::::::::::::::::::::::::::

query 3' UACGUGAGGUUGGGCAAAGGGU 5'  
query=miR1023e-3p, target=R03G\_02824, score=1, range=78-99, stran  
target 5' AUGCACUCCAACUCGUUCCCA 3'  
::::::::::::::::::::::::::

query 3' UACGUGAGGUUGGGCAAAGGGU 5'  
query=miR1023e-3p, target=R03G\_13714, score=1, range=78-99, stran  
target 5' AUGCACUCCAACUCGUUCCCA 3'  
::::::::::::::::::::::::::

query 3' UACGUGAGGUUGGGCAAAGGGU 5'  
query=miR1023e-3p, target=R03G\_16372, score=1, range=78-99, stran  
target 5' AUGCACUCCAACUCGUUCCCA 3'  
::::::::::::::::::::::::::

query 3' UACGUGAGGUUGGGCAAAGGGU 5'  
query=miR1023e-3p, target=R03G\_07705, score=1, range=78-99, stran



query 3' UACGUGAGGUUGGGCAAAGGGU 5'  
query=miR1023e-3p, target=R03G\_15261, score=1, range=78-99, stran  
target 5' AUGCACUCCAACUCGUUCCCA 3'

query 3' UACGUGAGGUUGGGCAAAGGGU 5'  
query=miR1023e-3p, target=R03G\_17017, score=1, range=78-99, stran  
target 5' AUGCACUCCAACUCGUUCCCA 3'

query 3' UACGUGAGGUUGGGCAAAGGGU 5'  
query=miR1023e-3p, target=R03G\_12653, score=1, range=516-537,  
strand=-1  
target 5' AUGCACUCCAACUCGUUCCCA 3'

query 3' UACGUGAGGUUGGGCAAAGGGU 5'  
query=miR1023e-3p, target=R03G\_04682, score=1, range=78-99, stran  
target 5' AUGCACUCCAACUCGUUCCCA 3'

query 3' UACGUGAGGUUGGGCAAAGGGU 5'  
query=miR1023e-3p, target=R03G\_16383, score=1, range=78-99, stran  
target 5' AUGCACUCCAACUCGUUCCCA 3'

query 3' UACGUGAGGUUGGGCAAAGGGU 5'  
query=miR1023e-3p, target=R03G\_11270, score=1, range=78-99, stran  
target 5' AUGCACUCCAACUCGUUCCCA 3'

query 3' UACGUGAGGUUGGGCAAAGGGU 5'  
query=miR1023e-3p, target=R03G\_17466, score=1, range=78-99, stran  
target 5' AUGCACUCCAACUCGUUCCCA 3'

query 3' UACGUGAGGUUGGGCAAAGGGU 5'  
query=miR1023e-3p, target=R03G\_17278, score=1, range=78-99, stran  
target 5' AUGCACUCCAACCCGUUUCUCA 3'

query 3' UACGUGAGGUUGGGCAAAGGGU 5'  
query=miR1023e-3p, target=R03G\_00245, score=1, range=78-99, stran  
target 5' AUGCACUCCAACCCGUUUCUCA 3'

query 3' UACGUGAGGUUGGGCAAAGGGU 5'  
query=miR1023e-3p, target=R03G\_17344, score=1, range=78-99, stran  
target 5' AUGCACUCCAACUCGUUCCCA 3'

query 3' UACGUGAGGUUGGGCAAAGGGU 5'  
query=miR1023e-3p, target=R03G\_09937, score=1.5, range=78-99,  
strand=-1





query=miR5751, target=R03G\_12400, score=3.5, range=701-720, stran  
target 5' GCAAGGCAUCUCAAUCAA 3'  
. :::::::::: ::::::::::  
query 3' UUUUCCGUAGACGUUUAGUU 5'  
query=miR5751, target=R03G\_13699, score=3.5, range=965-985, stran  
target 5' AAGAGUCAUCUGCAAAAUCAA 3'  
:::: :::::::::: ::::::::::  
query 3' UUUUCCGUAGACG-UUUAGUU 5'  
query=miR5751, target=R03G\_05579, score=4, range=1529-1548, stran  
target 5' AAAAGGAAUUUGAAAAUCAA 3'  
:::::: :::: ::::::::::  
query 3' UUUUCCGUAGACGUUUAGUU 5'  
query=miR5751, target=R03G\_15989, score=4, range=2263-2282, stran  
target 5' AAAAAGCGUCUGCAAUCGU 3'  
:::: :::::::::::::::  
query 3' UUUUCCGUAGACGUUUAGUU 5'  
query=miR5751, target=R03G\_13109, score=4, range=1910-1929, stran  
target 5' AGUAGGUAUCUGCAAUUUAU 3'  
.. :::::::::::::::  
query 3' UUUUCCGUAGACGUUUAGUU 5'  
query=miR5751, target=R03G\_00105, score=4, range=2268-2287, stran  
target 5' AGCGGGCAUCUGCAAUAAA 3'  
.. :::::::::::::: ::  
query 3' UUUUCCGUAGACGUUUAGUU 5'  
query=miR5751, target=R03G\_06132, score=4, range=590-610, strand=  
target 5' AAAAGUUAUCUGCUAAAUCAG 3'  
:::::: :::::::::: ::::::::::  
query 3' UUUUCCGUAGACG-UUUAGUU 5'  
query=miR5751, target=R03G\_16407, score=4, range=383-403, strand=  
target 5' AAAAGGAAAUCUGCAAUUUAU 3'  
:::::: :::::::::::::::  
query 3' UUUUCC-GUAGACGUUUAGUU 5'  
query=miR5751, target=R03G\_02082, score=4, range=764-784, strand=  
target 5' AAAAUCCAUCUGCCAAAUCAA 3'  
:::: :::::::::: ::::::::::  
query 3' UUUUCCGUAGAC-GUUUAGUU 5'  
query=miR530, target=R03G\_12973, score=0, range=4800-4819, strand  
target 5' GAGAGCCAGGUGCAUAAUCA 3'  
:::::::::::::::::::::  
query 3' CUCUCGGUCCACGUUUAGUU 5'  
query=miR530, target=R03G\_15143, score=0, range=2298-2317, strand  
target 5' GAGAGCCAGGUGCAUAAUCA 3'  
:::::::::::::::::::::  
query 3' CUCUCGGUCCACGUUUAGUU 5'  
query=miR530, target=R03G\_16143, score=0, range=4779-4798, strand



query 3' CUCUCGGUCCACGUUUAGU 5'  
query=miR530, target=R03G\_12651, score=0, range=489-508, strand=-  
target 5' GAGAGCCAGGUGCAUAAUCA 3'

query 3' CUCUCGGUCCACGUUUAGU 5'  
query=miR530, target=R03G\_02691, score=0, range=3228-3247, strand  
target 5' GAGAGCCAGGUGCAUAAUCA 3'

query 3' CUCUCGGUCCACGUUUAGU 5'  
query=miR530, target=R03G\_17318, score=0, range=4782-4801, strand  
target 5' GAGAGCCAGGUGCAUAAUCA 3'

query 3' CUCUCGGUCCACGUUUAGU 5'  
query=miR530, target=R03G\_04118, score=0, range=4782-4801, strand  
target 5' GAGAGCCAGGUGCAUAAUCA 3'

query 3' CUCUCGGUCCACGUUUAGU 5'  
query=miR530, target=R03G\_17329, score=0, range=4119-4138, strand  
target 5' GAGAGCCAGGUGCAUAAUCA 3'

query 3' CUCUCGGUCCACGUUUAGU 5'  
query=miR530, target=R03G\_07971, score=0, range=234-253, strand=-  
target 5' GAGAGCCAGGUGCAUAAUCA 3'

query 3' CUCUCGGUCCACGUUUAGU 5'  
query=miR530, target=R03G\_02849, score=0, range=4800-4819, strand  
target 5' GAGAGCCAGGUGCAUAAUCA 3'

query 3' CUCUCGGUCCACGUUUAGU 5'  
query=miR530, target=R03G\_15259, score=0, range=4800-4819, strand  
target 5' GAGAGCCAGGUGCAUAAUCA 3'

query 3' CUCUCGGUCCACGUUUAGU 5'  
query=miR530, target=R03G\_11778, score=0, range=4800-4819, strand  
target 5' GAGAGCCAGGUGCAUAAUCA 3'

query 3' CUCUCGGUCCACGUUUAGU 5'  
query=miR530, target=R03G\_05217, score=0, range=4800-4819, strand  
target 5' GAGAGCCAGGUGCAUAAUCA 3'

query 3' CUCUCGGUCCACGUUUAGU 5'  
query=miR530, target=R03G\_07982, score=0, range=4800-4819, strand  
target 5' GAGAGCCAGGUGCAUAAUCA 3'



query 3' CUCUCGGUCCACGUUUAGU 5'  
query=miR530, target=R03G\_00697, score=0, range=4800-4819, strand  
target 5' GAGAGCCAGGUGCAUAAUCA 3'  
.....  
query 3' CUCUCGGUCCACGUUUAGU 5'  
query=miR530, target=R03G\_07035, score=0, range=4800-4819, strand  
target 5' GAGAGCCAGGUGCAUAAUCA 3'  
.....  
query 3' CUCUCGGUCCACGUUUAGU 5'  
query=miR530, target=R03G\_10535, score=0, range=2427-2446, strand  
target 5' GAGAGCCAGGUGCAUAAUCA 3'  
.....  
query 3' CUCUCGGUCCACGUUUAGU 5'  
query=miR530, target=R03G\_02851, score=0, range=4800-4819, strand  
target 5' GAGAGCCAGGUGCAUAAUCA 3'  
.....  
query 3' CUCUCGGUCCACGUUUAGU 5'  
query=miR530, target=R03G\_17274, score=1, range=4605-4624, strand  
target 5' GAGAACCAGGUGCAUAAUCA 3'  
.... : .....

query 3' CUCUCGGUCCACGUUUAGU 5'  
query=miR530, target=R03G\_05852, score=4, range=517-536, strand=1  
target 5' GAAAACCAGGUGCGUGAUCA 3'  
:: : .....

query 3' CUCUCGGUCCACGUUUAGU 5'  
query=miR530, target=R03G\_12181, score=4, range=1596-1615, strand  
target 5' GGGAGUCAGGAGCAUAAUCC 3'  
..... : .....

query 3' CUCUCGGUCCACGUUUAGU 5'  
query=miR530, target=R03G\_05918, score=4, range=1302-1321, strand  
target 5' GGGAGUCAGGAGCAUAAUCC 3'  
..... : .....

query 3' CUCUCGGUCCACGUUUAGU 5'  
query=miR530, target=R03G\_01102, score=4, range=1863-1882, strand  
target 5' CUGAGGCAGGUGCAUGAUCA 3'  
... : .....

query 3' CUCUCGGUCCACGUUUAGU 5'  
query=miR530, target=R03G\_05951, score=4, range=816-835, strand=-  
target 5' GAAGUUCAGGUGCAUAGUCA 3'  
:: . .....

query 3' CUCUCGGUCCACGUUUAGU 5'  
query=miR530, target=R03G\_03890, score=4, range=396-416, strand=-  
target 5' GGAAGUGCAGGUGUAUAAUCA 3'  
:. .. : .....

query 3' CUCUCG-GUCCACGUUUAGU 5'





```
|||||
Sbjct: 255 AAGGGAGAAAAATTCGTACCGG 234
>miR1160.1 Score: 0.0 R03G_04790
Query: 1 TTCCCTCTTTTAAAGCATGGCC 22
|||||
Sbjct: 255 AAGGGAGAAAAATTCGTACCGG 234
>miR1160.1 Score: 0.0 R03G_03593
Query: 1 TTCCCTCTTTTAAAGCATGGCC 22
|||||
Sbjct: 255 AAGGGAGAAAAATTCGTACCGG 234
>miR1160.1 Score: 0.0 R03G_03626
Query: 1 TTCCCTCTTTTAAAGCATGGCC 22
|||||
Sbjct: 255 AAGGGAGAAAAATTCGTACCGG 234
>miR1160.1 Score: 0.0 R03G_00678
Query: 1 TTCCCTCTTTTAAAGCATGGCC 22
|||||
Sbjct: 219 AAGGGAGAAAAATTCGTACCGG 198
>miR1160.1 Score: 0.2 R03G_01589
Query: 1 TTCCCTCTTTTAAAGCATGGCC 22
|||||:|
Sbjct: 255 AAGGGAGAAAAATTCGTACTGG 234
>miR1160.1 Score: 1.0 R03G_17459
Query: 1 TTCCCTCTTTTAAAGCATGGCC 22
||||*|||||
Sbjct: 255 AAGGTAGAAAAATTCGTACCGG 234
>miR1160.1 Score: 0.0 R03G_17276
Query: 1 TTCCCTCTTTTAAAGCATGGCC 22
|||||
Sbjct: 939 AAGGGAGAAAAATTCGTACCGG 918
>miR5281b Score: 2.5 R03G_10068
Query: 1 TTTTAATAAAAGGAACGGAG 20
:*|||||*||
Sbjct: 265 GTAATTATTTTCCTTGATTC 246
>miR5281b Score: 2.0 R03G_08187
Query: 1 TTTTAATAAAAGGAACGG-AG 20
|||:|||||*||*||
Sbjct: 1267 AAAGTTATTTTCCTAGCCCTC 1247
>miR5281b Score: 2.2 R03G_06992
Query: 1 TTTTAATAAAAGGAACGGAG 20
:|:|||||*|*
Sbjct: 819 GAAGTTATTTTCCTTGT-TA 801
>miR5281b Score: 2.2 R03G_17117
Query: 1 TTTTAATAAAAGGAACGGAG 20
|||||**|:|
```

Sbjct: 684 AAAATTATTTTCCTGACTTC 665  
>miR5042-3p Score: 2.5 R03G\_07173  
Query: 1 TGGGCTTGAGTACAAGAAGG 20  
\*|||||\*|:|||||\*||  
Sbjct: 629 CCCCGAACGCGTGTCT-CC 611  
>miR5042-3p Score: 2.2 R03G\_00779  
Query: 1 TGGGCTTGAGTACAAGAAGG 20  
\*||:|:||||:|||||||:  
Sbjct: 3290 TCCTGGACTCGTGTCTTCT 3271  
>miR5565e Score: 0.0 R03G\_16107  
Query: 1 TATGGTCTAGATGTTGTCGGA 21  
|||||||  
Sbjct: 547 ATACCAGATCTACAACAGCCT 527  
>miR3711 Score: 2.2 R03G\_13432  
Query: 1 TAGCCAAGAAGGAGGTGCCT 20  
:|||||||\*|:|||||  
Sbjct: 567 GTCGGTCTTCTACTACGGA 548  
>miR3711 Score: 2.2 R03G\_11375  
Query: 1 TAGCCAAGAAGGAGGTGCCT 20  
||:|||||||\*||:||||:  
Sbjct: 1413 ATTGGTCTTCGTCTACGGG 1394  
>miR3711 Score: 2.2 R03G\_00301  
Query: 1 TAGCCAAGAAGGAGGTGCCT 20  
:|:|||||||\*|:|||||  
Sbjct: 1173 GTTGGTCTTCTACCACGGA 1154  
>miR170-3p Score: 2.5 R03G\_15840  
Query: 1 TATTGGCCGTGTAATATT 18  
||||\*|||:|:|||:|||  
Sbjct: 1099 ATAAACGGTATATTGTAA 1082  
>miR170-3p Score: 2.5 R03G\_10275  
Query: 1 TATTGGCCGTGTAATATT 18  
\*|||||||:||||\*|:  
Sbjct: 224 CTAACCGGCATATTACGA 207  
>miR170-3p Score: 2.2 R03G\_11045  
Query: 1 TATTGGCCGTGTAATATT 18  
:|||||||:|:|||\*|||  
Sbjct: 319 GTAACCGGTATATTTTAA 302  
>miR170-3p Score: 2.5 R03G\_10201  
Query: 1 TATTGGCCGTGTAATATT 18  
:|||\*|||||:||:||:  
Sbjct: 905 GTAAGCGGCACGTTGTAG 888  
>miR170-3p Score: 2.5 R03G\_08494  
Query: 1 TATTGGCCGTGTAATATT 18  
:||||\*||\*|||||||:  
Sbjct: 1032 GTAACGGGAACATTATAG 1015

>miR170-3p Score: 2.5 R03G\_08635  
Query: 1 TATTGGCCGTGTAATATT 18  
\*||||:|||||\*||||\*  
Sbjct: 805 CTAAGTGGCACAGTATAC 788

>miR2275b-3p Score: 2.5 R03G\_16737  
Query: 1 TTCAAGTTTCCATCGTAAATCT-A 23  
||||\*|||:|||||||\*|\*|  
Sbjct: 263 AAGTACAAGGGTAGCATTTAAACT 240

>miR2275b-3p Score: 2.5 R03G\_16541  
Query: 1 TTCAAGTTTCCATCGTAAATCT-A 23  
||||\*|||:|||||||\*|\*|  
Sbjct: 263 AAGTACAAGGGTAGCATTTAAACT 240

>miR2275b-3p Score: 2.5 R03G\_16141  
Query: 1 TTCAAGTTTCCATCGTAAATCT-A 23  
||||\*|||:|||||||\*|\*|  
Sbjct: 263 AAGTACAAGGGTAGCATTTAAACT 240

>miR2275b-3p Score: 2.5 R03G\_16124  
Query: 1 TTCAAGTTTCCATCGTAAATCT-A 23  
||||\*|||:|||||||\*|\*|  
Sbjct: 263 AAGTACAAGGGTAGCATTTAAACT 240

>miR2275b-3p Score: 2.5 R03G\_15286  
Query: 1 TTCAAGTTTCCATCGTAAATCT-A 23  
||||\*|||:|||||||\*|\*|  
Sbjct: 263 AAGTACAAGGGTAGCATTTAAACT 240

>miR2275b-3p Score: 2.5 R03G\_14981  
Query: 1 TTCAAGTTTCCATCGTAAATCT-A 23  
||||\*|||:|||||||\*|\*|  
Sbjct: 263 AAGTACAAGGGTAGCATTTAAACT 240

>miR2275b-3p Score: 2.5 R03G\_15170  
Query: 1 TTCAAGTTTCCATCGTAAATCT-A 23  
||||\*|||:|||||||\*|\*|  
Sbjct: 263 AAGTACAAGGGTAGCATTTAAACT 240

>miR2275b-3p Score: 2.5 R03G\_14784  
Query: 1 TTCAAGTTTCCATCGTAAATCT-A 23  
||||\*|||:|||||||\*|\*|  
Sbjct: 263 AAGTACAAGGGTAGCATTTAAACT 240

>miR2275b-3p Score: 2.5 R03G\_13752  
Query: 1 TTCAAGTTTCCATCGTAAATCT-A 23  
||||\*|||:|||||||\*|\*|  
Sbjct: 263 AAGTACAAGGGTAGCATTTAAACT 240

>miR2275b-3p Score: 2.5 R03G\_12950  
Query: 1 TTCAAGTTTCCATCGTAAATCT-A 23  
||||\*|||:|||||||\*|\*|  
Sbjct: 263 AAGTACAAGGGTAGCATTTAAACT 240

>miR2275b-3p Score: 2.5 R03G\_13267

Query: 1 TTCAAGTTTCCATCGTAAATCT-A 23  
||||\*|||:|||||||||||\*|\*|  
Sbjct: 263 AAGTACAAGGGTAGCATTTAAACT 240  
>miR2275b-3p Score: 2.5 R03G\_12084  
Query: 1 TTCAAGTTTCCATCGTAAATCT-A 23  
||||\*|||:|||||||||||\*|\*|  
Sbjct: 263 AAGTACAAGGGTAGCATTTAAACT 240  
>miR2275b-3p Score: 2.5 R03G\_11533  
Query: 1 TTCAAGTTTCCATCGTAAATCT-A 23  
||||\*|||:|||||||||||\*|\*|  
Sbjct: 263 AAGTACAAGGGTAGCATTTAAACT 240  
>miR2275b-3p Score: 2.5 R03G\_11536  
Query: 1 TTCAAGTTTCCATCGTAAATCT-A 23  
||||\*|||:|||||||||||\*|\*|  
Sbjct: 263 AAGTACAAGGGTAGCATTTAAACT 240  
>miR2275b-3p Score: 2.5 R03G\_10785  
Query: 1 TTCAAGTTTCCATCGTAAATCT-A 23  
||||\*|||:|||||||||||\*|\*|  
Sbjct: 263 AAGTACAAGGGTAGCATTTAAACT 240  
>miR2275b-3p Score: 2.5 R03G\_09926  
Query: 1 TTCAAGTTTCCATCGTAAATCT-A 23  
||||\*|||:|||||||||||\*|\*|  
Sbjct: 263 AAGTACAAGGGTAGCATTTAAACT 240  
>miR2275b-3p Score: 2.5 R03G\_10050  
Query: 1 TTCAAGTTTCCATCGTAAATCT-A 23  
||||\*|||:|||||||||||\*|\*|  
Sbjct: 263 AAGTACAAGGGTAGCATTTAAACT 240  
>miR2275b-3p Score: 2.5 R03G\_07723  
Query: 1 TTCAAGTTTCCATCGTAAATCT-A 23  
||||\*|||:|||||||||||\*|\*|  
Sbjct: 263 AAGTACAAGGGTAGCATTTAAACT 240  
>miR2275b-3p Score: 2.5 R03G\_05522  
Query: 1 TTCAAGTTTCCATCGTAAATCT-A 23  
||||\*|||:|||||||||||\*|\*|  
Sbjct: 629 AAGTACAAGGGTAGCATTTAAACT 606  
>miR2275b-3p Score: 2.5 R03G\_05516  
Query: 1 TTCAAGTTTCCATCGTAAATCT-A 23  
||||\*|||:|||||||||||\*|\*|  
Sbjct: 263 AAGTACAAGGGTAGCATTTAAACT 240  
>miR2275b-3p Score: 2.5 R03G\_03112  
Query: 1 TTCAAGTTTCCATCGTAAATCT-A 23  
||||\*|||:|||||||||||\*|\*|  
Sbjct: 629 AAGTACAAGGGTAGCATTTAAACT 606  
>miR2275b-3p Score: 2.5 R03G\_03560  
Query: 1 TTCAAGTTTCCATCGTAAATCT-A 23

```
||||*|||:|||||||*|*|
Sbjct: 263 AAGTACAAGGGTAGCATTTAAACT 240
>miR2275b-3p Score: 2.5 R03G_03791
Query: 1 TTCAAGTTTCCATCGTAAATCT-A 23
||||*|||:|||||||*|*|
Sbjct: 263 AAGTACAAGGGTAGCATTTAAACT 240
>miR2275b-3p Score: 2.5 R03G_00240
Query: 1 TTCAAGTTTCCATCGTAAATCT-A 23
||||*|||:|||||||*|*|
Sbjct: 572 AAGTACAAGGGTAGCATTTAAACT 549
>miR2275b-3p Score: 2.5 R03G_00250
Query: 1 TTCAAGTTTCCATCGTAAATCT-A 23
||||*|||:|||||||*|*|
Sbjct: 263 AAGTACAAGGGTAGCATTTAAACT 240
>miR2275b-3p Score: 2.5 R03G_01725
Query: 1 TTCAAGTTTCCATCGTAAATCT-A 23
||||*|||:|||||||*|*|
Sbjct: 263 AAGTACAAGGGTAGCATTTAAACT 240
>miR2275b-3p Score: 2.5 R03G_02227
Query: 1 TTCAAGTTTCCATCGTAAATCT-A 23
||||*|||:|||||||*|*|
Sbjct: 629 AAGTACAAGGGTAGCATTTAAACT 606
>miR2275b-3p Score: 2.5 R03G_17423
Query: 1 TTCAAGTTTCCATCGTAAATCT-A 23
||||*|||:|||||||*|*|
Sbjct: 263 AAGTACAAGGGTAGCATTTAAACT 240
>miR2275b-3p Score: 2.5 R03G_17328
Query: 1 TTCAAGTTTCCATCGTAAATCT-A 23
||||*|||:|||||||*|*|
Sbjct: 263 AAGTACAAGGGTAGCATTTAAACT 240
>miR2275b-3p Score: 2.5 R03G_17092
Query: 1 TTCAAGTTTCCATCGTAAATCT-A 23
||||*|||:|||||||*|*|
Sbjct: 263 AAGTACAAGGGTAGCATTTAAACT 240
>miR5743a Score: 0.0 R03G_08617
Query: 1 TGAGAAGTTTTCCCACCATT 20
|||||||
Sbjct: 300 ACTCTTCAAAGGGTGGTAA 281
>miR5743a Score: 0.5 R03G_03516
Query: 1 TGAGAAGTTTTCCCACCATT 20
|||||:|||||||
Sbjct: 1635 ACTCTTTAAAAGGGTGGTAA 1616
>miR159g-3p Score: 2.5 R03G_15485
Query: 1 TTTGGAGTGAAGCGATTTGA 20
*|||:|||||||:||:*
```



Sbjct: 3592 TAACTTCACTTCGTTAG-CT 3574  
>miR159g-3p Score: 0.5 R03G\_10142  
Query: 1 TTTGGAGTGAAGCGATTTGA 20  
||||:|||||||

Sbjct: 598 AACTTCACTTCGCTAAACT 579  
>miR159g-3p Score: 2.5 R03G\_08255  
Query: 1 TTTGGAGTGAAGCGATTTGA 20  
\*|||||||\*|:||||\*||

Sbjct: 237 CAACCTCACTTAGTTAA-CT 219  
>miR159g-3p Score: 2.5 R03G\_06080  
Query: 1 TTTGGAGTGAAGCGATTTGA 20  
|||||\*|||||\*||||\*||

Sbjct: 855 AACCTAACTTCCCTAA-CT 837  
>miR159g-3p Score: 2.0 R03G\_02867  
Query: 1 TTTGGAGTGAAGCGATTTGA 20  
||||:|:\*|||||||

Sbjct: 526 AACTTTCCTTCGCTAAACT 507  
>miR159g-3p Score: 2.0 R03G\_02881  
Query: 1 TTTGGAGTGAAGCGATTTGA 20  
|||||:|:||||\*|||||

Sbjct: 3834 AACCTTATTTCTCTAAACT 3815  
>miR159g-3p Score: 0.5 R03G\_03107  
Query: 1 TTTGGAGTGAAGCGATTTGA 20  
||||:|||||||

Sbjct: 598 AACTTCACTTCGCTAAACT 579  
>miR397a Score: 2.5 R03G\_11794  
Query: 1 TCATTGAGTGCAGCGTTGATG 21  
\*|||||||:|\*|||||\*|||

Sbjct: 2483 TGTAACATGCCGCAAGTAC 2463  
>miR397a Score: 2.5 R03G\_03441  
Query: 1 TCATTGAGTGCAGCGTTG-ATG 21  
\*|||||||:|:|:|:|\*|||

Sbjct: 477 TGTAACCTGCGTTGCAACCTAC 456  
>miR8775 Score: 2.5 R03G\_09103  
Query: 1 TTGCAGATTGAACCGATGG 19  
||||\*|\*|||||||\*|

Sbjct: 908 AACGAGTAACTTGCTAAC 890  
>miR8775 Score: 2.5 R03G\_04618  
Query: 1 TTGCAGATTGAACCGATGG 19  
||||\*|:|||||||:|\*|

Sbjct: 37 AACGGTAACTTGGTTAAC 19  
>miR3946 Score: 1.0 R03G\_17023  
Query: 1 TGTAGAGAAAAGAGAGCATG 22  
|||||||\*|||||

Sbjct: 1246 ACATCTCTTTTCTCCCTCGTAC 1225

>miR8748 Score: 1.0 R03G\_17257  
Query: 1 TGATGGTGATGATAATAATGAAT 23  
|||||\*|||||  
Sbjct: 2127 ACTACCACTACTACTATTACTTA 2105

>miR8748 Score: 1.0 R03G\_16749  
Query: 1 TGATGGTGATGATAATAATGAAT 23  
|||||\*|||||  
Sbjct: 2211 ACTACCACTACTACTATTACTTA 2189

>miR8748 Score: 2.5 R03G\_16764  
Query: 1 TGATGGTGATGATAATAATGAAT 23  
:|||||:|||||\*|||:\*|||  
Sbjct: 722 GCTACCATTACTACTATTG-TTA 701

>miR8748 Score: 1.0 R03G\_16136  
Query: 1 TGATGGTGATGATAATAATGAAT 23  
|||||\*|||||  
Sbjct: 2127 ACTACCACTACTACTATTACTTA 2105

>miR8748 Score: 1.0 R03G\_15889  
Query: 1 TGATGGTGATGATAATAATGAAT 23  
|||||\*|||||  
Sbjct: 2127 ACTACCACTACTACTATTACTTA 2105

>miR8748 Score: 1.0 R03G\_13145  
Query: 1 TGATGGTGATGATAATAATGAAT 23  
|||||\*|||||  
Sbjct: 2211 ACTACCACTACTACTATTACTTA 2189

>miR8748 Score: 1.0 R03G\_13273  
Query: 1 TGATGGTGATGATAATAATGAAT 23  
|||||\*|||||  
Sbjct: 2211 ACTACCACTACTACTATTACTTA 2189

>miR8748 Score: 1.0 R03G\_10735  
Query: 1 TGATGGTGATGATAATAATGAAT 23  
|||||\*|||||  
Sbjct: 1656 ACTACCACTACTACTATTACTTA 1634

>miR8748 Score: 2.2 R03G\_11036  
Query: 1 TGATGGTGATGATAATAATGAAT 23  
::|||:|||||:|||||\*|||  
Sbjct: 1069 GTTACTACTACTGTTATTAC-TA 1048

>miR8748 Score: 1.0 R03G\_09516  
Query: 1 TGATGGTGATGATAATAATGAAT 23  
|||||:|||||\*|||  
Sbjct: 262 ACTACTACTACTATTATTA-TTA 241

>miR8748 Score: 1.0 R03G\_10040  
Query: 1 TGATGGTGATGATAATAATGAAT 23  
|||||\*|||||  
Sbjct: 801 ACTACCACTACTACTATTACTTA 779

>miR8748 Score: 1.0 R03G\_10217

Query: 1 TGATGGTGATGATAATAATGAAT 23  
| | | | | | | | | | | \* | | | | | | | | | |  
Sbjct: 2211 ACTACCACTACTACTATTACTTA 2189  
>miR8748 Score: 2.0 R03G\_08929  
Query: 1 TGATGGTGATGATAATAATGAAT 23  
| | | | | \* : | | | | | | | | | | \* | | | |  
Sbjct: 30 ACTACCTTTACTATTATTA-TTA 9  
>miR8748 Score: 2.5 R03G\_08974  
Query: 1 TGATGGTGATGATAATAATGAAT 23  
: | | | | | | : \* | | | | | | | | : | | \* |  
Sbjct: 176 GCTACCATCACTATTATTGCTAA 154  
>miR8748 Score: 1.0 R03G\_09183  
Query: 1 TGATGGTGATGATAATAATGAAT 23  
| | | | | | | | | | | \* | | | | | | | | | |  
Sbjct: 1344 ACTACCACTACTACTATTACTTA 1322  
>miR8748 Score: 2.5 R03G\_07191  
Query: 1 TGATGGTGATGATAATAATGAAT 23  
| | | | | | | | | | | | \* | \* | \* | \* | | | |  
Sbjct: 303 ACTACCACTACTATTACGAGATA 281  
>miR8748 Score: 1.0 R03G\_07697  
Query: 1 TGATGGTGATGATAATAATGAAT 23  
| | | | | | | | | | | \* | | | | | | | | | |  
Sbjct: 537 ACTACCACTACTACTATTACTTA 515  
>miR8748 Score: 0.0 R03G\_04592  
Query: 1 TGATGGTGATGATAATAATGAAT 23  
| | | | | | | | | | | | | | | | | | | | | |  
Sbjct: 1383 ACTACCACTACTATTATTACTTA 1361  
>miR8748 Score: 1.0 R03G\_04681  
Query: 1 TGATGGTGATGATAATAATGAAT 23  
| | | | | | | | | | | \* | | | | | | | | | |  
Sbjct: 801 ACTACCACTACTACTATTACTTA 779  
>miR8748 Score: 2.5 R03G\_04843  
Query: 1 TGATGGTGATGATAATAATGAAT 23  
| : | | : | | : | | : | | | | | | \* | | | |  
Sbjct: 368 ATTATCATTATTATTATTA-TTA 347  
>miR8748 Score: 1.0 R03G\_05424  
Query: 1 TGATGGTGATGATAATAATGAAT 23  
| | | | | | | | | | | \* | | | | | | | | | |  
Sbjct: 2127 ACTACCACTACTACTATTACTTA 2105  
>miR8748 Score: 2.2 R03G\_02397  
Query: 1 TGATGGTGATGATAATAATGAAT 23  
| | | | | : | | | | | | | \* | | | | \* : | | | |  
Sbjct: 357 ACTACTACTACTATCATT-TTTA 336  
>miR8748 Score: 2.0 R03G\_02763  
Query: 1 TGATGGTGATGATAATAATGAAT 23

|||||:|:||||||\*||  
Sbjct: 865 ACTACCGTTATTATTATTA-TTA 844  
>miR8748 Score: 1.5 R03G\_00289  
Query: 1 TGATGGTGATGATAATAATGAAT 23  
|||||||\*|||\*||  
Sbjct: 945 ACTACCACTACTACTATTAC-TA 924  
>miR8748 Score: 2.5 R03G\_01410  
Query: 1 TGATGGTGATGATAATAATGAAT 23  
||||:|||||\*|||\*||  
Sbjct: 459 ACTACTACTACTACTATTTC-TA 438  
>miR8748 Score: 2.2 R03G\_01780  
Query: 1 TGATGGTGATGATAATAATGAAT 23  
|||||:||||:||||\*|:\*||  
Sbjct: 1267 ACTACCGCTACTGTTAT-ATCTA 1246  
>miR8748 Score: 1.0 R03G\_17351  
Query: 1 TGATGGTGATGATAATAATGAAT 23  
|||||||\*|||||||  
Sbjct: 939 ACTACCACTACTACTATTACTTA 917  
>miR408-3p Score: 2.5 R03G\_12917  
Query: 1 ATGCACTGCCTCTTCCCTGG 20  
\*|||||:|:|||||||:|\*  
Sbjct: 370 CACGTGGTGGAGAAGGGGTA 351  
>miR408-3p Score: 2.5 R03G\_04352  
Query: 1 ATGCACTGCCTCTTCCCTGG 20  
\*:|||\*|||||||\*|  
Sbjct: 706 GGCGTTACGGAGAAGGGAAC 687  
>miR9663-5p Score: 0.0 R03G\_16744  
Query: 1 AACGTAGTCGACCGATTCT 19  
|||||||  
Sbjct: 945 TTGCATCAGCTGGCTAAGA 927  
>miR9663-5p Score: 0.0 R03G\_16686  
Query: 1 AACGTAGTCGACCGATTCT 19  
|||||||  
Sbjct: 945 TTGCATCAGCTGGCTAAGA 927  
>miR9663-5p Score: 2.5 R03G\_16171  
Query: 1 AACGTAGTCGACCGATTCT 19  
\*|||||||\*||:|||\*|  
Sbjct: 7764 CTGCATCAGCCGGTTAA-A 7747  
>miR9663-5p Score: 0.0 R03G\_15869  
Query: 1 AACGTAGTCGACCGATTCT 19  
|||||||  
Sbjct: 945 TTGCATCAGCTGGCTAAGA 927  
>miR9663-5p Score: 0.0 R03G\_14704  
Query: 1 AACGTAGTCGACCGATTCT 19  
|||||||

Sbjct: 945 TTGCATCAGCTGGCTAAGA 927  
>miR9663-5p Score: 0.0 R03G\_13859  
Query: 1 AACGTAGTCGACCGATTCT 19  
|||||

Sbjct: 570 TTGCATCAGCTGGCTAAGA 552  
>miR9663-5p Score: 0.0 R03G\_12951  
Query: 1 AACGTAGTCGACCGATTCT 19  
|||||

Sbjct: 945 TTGCATCAGCTGGCTAAGA 927  
>miR9663-5p Score: 0.0 R03G\_12979  
Query: 1 AACGTAGTCGACCGATTCT 19  
|||||

Sbjct: 945 TTGCATCAGCTGGCTAAGA 927  
>miR9663-5p Score: 0.0 R03G\_13152  
Query: 1 AACGTAGTCGACCGATTCT 19  
|||||

Sbjct: 945 TTGCATCAGCTGGCTAAGA 927  
>miR9663-5p Score: 0.0 R03G\_11970  
Query: 1 AACGTAGTCGACCGATTCT 19  
|||||

Sbjct: 945 TTGCATCAGCTGGCTAAGA 927  
>miR9663-5p Score: 0.0 R03G\_12087  
Query: 1 AACGTAGTCGACCGATTCT 19  
|||||

Sbjct: 945 TTGCATCAGCTGGCTAAGA 927  
>miR9663-5p Score: 0.0 R03G\_12194  
Query: 1 AACGTAGTCGACCGATTCT 19  
|||||

Sbjct: 945 TTGCATCAGCTGGCTAAGA 927  
>miR9663-5p Score: 0.0 R03G\_11275  
Query: 1 AACGTAGTCGACCGATTCT 19  
|||||

Sbjct: 945 TTGCATCAGCTGGCTAAGA 927  
>miR9663-5p Score: 0.0 R03G\_11403  
Query: 1 AACGTAGTCGACCGATTCT 19  
|||||

Sbjct: 945 TTGCATCAGCTGGCTAAGA 927  
>miR9663-5p Score: 0.0 R03G\_10555  
Query: 1 AACGTAGTCGACCGATTCT 19  
|||||

Sbjct: 945 TTGCATCAGCTGGCTAAGA 927  
>miR9663-5p Score: 0.0 R03G\_10560  
Query: 1 AACGTAGTCGACCGATTCT 19  
|||||

Sbjct: 945 TTGCATCAGCTGGCTAAGA 927

>miR9663-5p Score: 2.2 R03G\_10896  
Query: 1 AACGTAGTCGACCGATTCT 19  
\*|||:|\*|||||||:|  
Sbjct: 431 ATGCGTAAGCTGGCTAAGG 413

>miR9663-5p Score: 0.0 R03G\_09376  
Query: 1 AACGTAGTCGACCGATTCT 19  
|||||||  
Sbjct: 945 TTGCATCAGCTGGCTAAGA 927

>miR9663-5p Score: 0.0 R03G\_08612  
Query: 1 AACGTAGTCGACCGATTCT 19  
|||||||  
Sbjct: 945 TTGCATCAGCTGGCTAAGA 927

>miR9663-5p Score: 0.0 R03G\_07104  
Query: 1 AACGTAGTCGACCGATTCT 19  
|||||||  
Sbjct: 945 TTGCATCAGCTGGCTAAGA 927

>miR9663-5p Score: 0.0 R03G\_07305  
Query: 1 AACGTAGTCGACCGATTCT 19  
|||||||  
Sbjct: 945 TTGCATCAGCTGGCTAAGA 927

>miR9663-5p Score: 0.0 R03G\_05630  
Query: 1 AACGTAGTCGACCGATTCT 19  
|||||||  
Sbjct: 945 TTGCATCAGCTGGCTAAGA 927

>miR9663-5p Score: 0.0 R03G\_06416  
Query: 1 AACGTAGTCGACCGATTCT 19  
|||||||  
Sbjct: 945 TTGCATCAGCTGGCTAAGA 927

>miR9663-5p Score: 0.0 R03G\_05280  
Query: 1 AACGTAGTCGACCGATTCT 19  
|||||||  
Sbjct: 945 TTGCATCAGCTGGCTAAGA 927

>miR9663-5p Score: 0.0 R03G\_02235  
Query: 1 AACGTAGTCGACCGATTCT 19  
|||||||  
Sbjct: 288 TTGCATCAGCTGGCTAAGA 270

>miR9663-5p Score: 0.0 R03G\_03103  
Query: 1 AACGTAGTCGACCGATTCT 19  
|||||||  
Sbjct: 945 TTGCATCAGCTGGCTAAGA 927

>miR9663-5p Score: 0.0 R03G\_03988  
Query: 1 AACGTAGTCGACCGATTCT 19  
|||||||  
Sbjct: 945 TTGCATCAGCTGGCTAAGA 927

>miR9663-5p Score: 0.0 R03G\_01203  
Query: 1 AACGTAGTCGACCGATTCT 19  
|||||||  
Sbjct: 945 TTGCATCAGCTGGCTAAGA 927

Query: 1 AACGTAGTCGACCGATTCT 19  
|||||  
Sbjct: 945 TTGCATCAGCTGGCTAAGA 927  
>miR9663-5p Score: 0.0 R03G\_01718  
Query: 1 AACGTAGTCGACCGATTCT 19  
|||||  
Sbjct: 945 TTGCATCAGCTGGCTAAGA 927  
>miR9554-3p Score: 2.5 R03G\_12339  
Query: 1 TCATAGCTCAAGTCATCATTTCAT 23  
|||||\*|||||\*\*|\*|  
Sbjct: 1340 AGTATCAAGTTCAGTAGT-CGAA 1319  
>miR9554-3p Score: 0.0 R03G\_12520  
Query: 1 TCATAGCTCAAGTCATCATTTCAT 23  
|||||  
Sbjct: 1583 AGTATCGAGTTCAGTAGTAAGTA 1561  
>miR9554-3p Score: 2.5 R03G\_11933  
Query: 1 TCATAGCTCAAGTCATCATTTCAT 23  
||\*||||\*|||||\*|||||  
Sbjct: 23 AGCATCGAATTCAGTAGCAAGTA 1  
>miR9554-3p Score: 0.0 R03G\_00797  
Query: 1 TCATAGCTCAAGTCATCATTTCAT 23  
|||||  
Sbjct: 1583 AGTATCGAGTTCAGTAGTAAGTA 1561  
>miR9554-3p Score: 2.0 R03G\_01994  
Query: 1 TCATAGCTCAAGTCATCATTTCAT 23  
|\*|||:|||||\*|||||  
Sbjct: 443 AATATTGAGTTCAGTAGT-AGTA 422  
>miR9554-3p Score: 1.5 R03G\_02103  
Query: 1 TCATAGCTCAAGTCATCATTTCAT 23  
|||||\*||\*|||||  
Sbjct: 110 AGTATCGAGTTCAGCAGCAAGTA 88  
>miR858b Score: 2.5 R03G\_11693  
Query: 1 TTCGTTCTGTTTCGTCGCTTG 20  
|||:||||\*|||||\*|||  
Sbjct: 153 AAGTAAGAAAAGCAGCAAAC 134  
>miR827 Score: 2.5 R03G\_16161  
Query: 1 TTAGATGACCATCAACAAAT 20  
|||:|||||\*||\*|||  
Sbjct: 694 AATTTACTGGTAGTAATTTA 675  
>miR827 Score: 2.5 R03G\_15356  
Query: 1 TTAGATGACCATCAACAAAT 20  
|||||\*|:|\*|||  
Sbjct: 706 AATCTACTGTTGGTGGTTTA 687  
>miR827 Score: 2.2 R03G\_05422  
Query: 1 TTAGATGACCATCAACAAAT 20

||\*|||||||:|||||\*:  
Sbjct: 352 AAGCTACTGGTGGTTGTTCCG 333  
>miR171a-3p Score: 2.5 R03G\_16320  
Query: 1 TGATTGAGCCGCGCCAAT-AT 20  
\*|||||||\*||:|||||\*||  
Sbjct: 366 CCTAACTCGACGTGGTTAGTA 346  
>miR2656a Score: 1.5 R03G\_17222  
Query: 1 TAAGTTGCATATTGGACGTTGG 22  
||\*|||||||\*|||  
Sbjct: 202 ATCCAACGTATAACCTGCTACC 181  
>miR2656a Score: 1.0 R03G\_13919  
Query: 1 TAAGTTGCATATTGGACGTTGG 22  
||\*|||||||\*|||  
Sbjct: 202 ATCCAACGTATAACCTGCAACC 181  
>miR2656a Score: 1.0 R03G\_13454  
Query: 1 TAAGTTGCATATTGGACGTTGG 22  
||\*|||||||\*|||  
Sbjct: 202 ATCCAACGTATAACCTGCAACC 181  
>miR2656a Score: 1.0 R03G\_12678  
Query: 1 TAAGTTGCATATTGGACGTTGG 22  
||\*|||||||\*|||  
Sbjct: 202 ATCCAACGTATAACCTGCAACC 181  
>miR2656a Score: 1.0 R03G\_13286  
Query: 1 TAAGTTGCATATTGGACGTTGG 22  
||\*|||||||\*|||  
Sbjct: 202 ATCCAACGTATAACCTGCAACC 181  
>miR2656a Score: 2.0 R03G\_07707  
Query: 1 TAAGTTGCATATTGGACGTTGG 22  
||\*\*|||||||\*|||  
Sbjct: 202 ATCAAACGTATAACCTGCAACC 181  
>miR2656a Score: 1.0 R03G\_02706  
Query: 1 TAAGTTGCATATTGGACGTTGG 22  
||\*|||||||\*|||  
Sbjct: 202 ATCCAACGTATAACCTGCAACC 181  
>miR2656a Score: 0.0 R03G\_02845  
Query: 1 TAAGTTGCATATTGGACGTTGG 22  
|||||||\*|||  
Sbjct: 235 ATTCAACGTATAACCTGCAACC 214  
>miR2656a Score: 1.0 R03G\_03602  
Query: 1 TAAGTTGCATATTGGACGTTGG 22  
||\*|||||||\*|||  
Sbjct: 202 ATCCAACGTATAACCTGCAACC 181  
>miR2656a Score: 1.0 R03G\_00284  
Query: 1 TAAGTTGCATATTGGACGTTGG 22  
||\*|||||||\*|||



Sbjct: 202 ATCCAACGTATAACCTGCAACC 181  
>miR2656a Score: 1.0 R03G\_00679  
Query: 1 TAAGTTGCATATTGGACGTTGG 22  
||\*|||||||||||||||||||  
Sbjct: 202 ATCCAACGTATAACCTGCAACC 181  
>miR2656a Score: 2.2 R03G\_01914  
Query: 1 TAAGTTGCATATTGGACGTTGG 22  
|||:||||\*|||||||||\*|||:  
Sbjct: 85 ATTTAACCTATAACCTG-AACT 65  
>miR2656a Score: 1.0 R03G\_01960  
Query: 1 TAAGTTGCATATTGGACGTTGG 22  
||\*|||||||||||||||||||  
Sbjct: 202 ATCCAACGTATAACCTGCAACC 181  
>miR8123-3p Score: 1.5 R03G\_17202  
Query: 1 TTGTCGCCATTGGTCCAAGTC 21  
||:|\*|||||||||||||||||  
Sbjct: 503 AATAACGGTAACCAGGTTTCAG 483  
>miR8123-3p Score: 0.0 R03G\_16829  
Query: 1 TTGTCGCCATTGGTCCAAGTC 21  
|||||||||||||||||||||  
Sbjct: 503 AACAGCGGTAACCAGGTTTCAG 483  
>miR8123-3p Score: 0.0 R03G\_16904  
Query: 1 TTGTCGCCATTGGTCCAAGTC 21  
|||||||||||||||||||||  
Sbjct: 503 AACAGCGGTAACCAGGTTTCAG 483  
>miR8123-3p Score: 0.5 R03G\_16721  
Query: 1 TTGTCGCCATTGGTCCAAGTC 21  
||:|||||||||||||||||||  
Sbjct: 461 AATAGCGGTAACCAGGTTTCAG 441  
>miR8123-3p Score: 0.8 R03G\_16703  
Query: 1 TTGTCGCCATTGGTCCAAGTC 21  
||:||||||||||||||||||:|  
Sbjct: 503 AATAGCGGTAACCAGGTTTCGG 483  
>miR8123-3p Score: 0.0 R03G\_16428  
Query: 1 TTGTCGCCATTGGTCCAAGTC 21  
|||||||||||||||||||||  
Sbjct: 140 AACAGCGGTAACCAGGTTTCAG 120  
>miR8123-3p Score: 1.0 R03G\_13734  
Query: 1 TTGTCGCCATTGGTCCAAGTC 21  
||:|||||||:|||||||  
Sbjct: 503 AATAGCGGTAATCAGGTTTCAG 483  
>miR8123-3p Score: 1.0 R03G\_12060  
Query: 1 TTGTCGCCATTGGTCCAAGTC 21  
||:|||||||:|||||||  
Sbjct: 140 AATAGCGGTAATCAGGTTTCAG 120

>miR8123-3p Score: 0.5 R03G\_11411  
Query: 1 TTGTCGCCATTGGTCCAAGTC 21  
||:||||||||||||||||||  
Sbjct: 140 AATAGCGGTAACCAGGTTTCAG 120

>miR8123-3p Score: 0.5 R03G\_05945  
Query: 1 TTGTCGCCATTGGTCCAAGTC 21  
||:||||||||||||||||||  
Sbjct: 140 AATAGCGGTAACCAGGTTTCAG 120

>miR8123-3p Score: 1.5 R03G\_03594  
Query: 1 TTGTCGCCATTGGTCCAAGTC 21  
||:|\*||||||||||||||  
Sbjct: 140 AATAACGGTAACCAGGTTTCAG 120

>miR8123-3p Score: 1.5 R03G\_00676  
Query: 1 TTGTCGCCATTGGTCCAAGTC 21  
||:|||||||||\*||||||  
Sbjct: 503 AATAGCGGTAACGAGGTTTCAG 483

>miR8123-3p Score: 1.0 R03G\_02224  
Query: 1 TTGTCGCCATTGGTCCAAGTC 21  
||:|||||||||:||||||  
Sbjct: 140 AATAGCGGTAATCAGGTTTCAG 120

>miR8123-3p Score: 1.0 R03G\_17154  
Query: 1 TTGTCGCCATTGGTCCAAGTC 21  
||:|||||||||:||||||  
Sbjct: 140 AATAGCGGTAATCAGGTTTCAG 120

>miR2622 Score: 2.2 R03G\_14266  
Query: 1 TTTGAGGCCATCGTGAAACAT-TA 23  
|||||||:|:|\*|:|\*|  
Sbjct: 1032 AAActCCGGTAGTATTTAGTGTAT 1009

>miR7495a Score: 2.5 R03G\_16104  
Query: 1 TTCTTGTAGTGCCTCCTTCA 20  
|||||:|:|\*|:||||||  
Sbjct: 67 AAGAACGTTTTGGAGGAAGT 48

>miR7495a Score: 2.5 R03G\_14467  
Query: 1 TTCTTGTAGTGCCTCCTTCA 20  
||||:||||\*||\*||||  
Sbjct: 504 AAGAGCATCTCGGTGGAAGT 485

>miR7495a Score: 2.5 R03G\_14722  
Query: 1 TTCTTGTAGTGCCTCCTTCA 20  
||||:||||\*||\*||||  
Sbjct: 975 AAGAGCATCTCGGTGGAAGT 956

>miR7495a Score: 2.5 R03G\_13903  
Query: 1 TTCTTGTAGTGCCTCCTTCA 20  
||||:||||\*||\*||||  
Sbjct: 975 AAGAGCATCTCGGTGGAAGT 956

>miR7495a Score: 2.5 R03G\_13664

Query: 1 TTCTTG TAGTGCCTCCTTCA 20  
||||:||||\*|||\*|||||  
Sbjct: 975 AAGAGCATCTCGGTGGAAGT 956  
>miR7495a Score: 2.5 R03G\_13672

Query: 1 TTCTTG TAGTGCCTCCTTCA 20  
||||:||||\*|||\*|||||  
Sbjct: 975 AAGAGCATCTCGGTGGAAGT 956  
>miR7495a Score: 2.5 R03G\_12139

Query: 1 TTCTTG TAGTGCCTCCTTCA 20  
||||:||||\*|||\*|||||  
Sbjct: 348 AAGAGCATCTCGGTGGAAGT 329  
>miR7495a Score: 2.5 R03G\_11171

Query: 1 TTCTTG TAGTGCCTCCTTCA 20  
|||||||:|:|\*|||\*|||\*  
Sbjct: 510 AAGAACATTGTGGAGGA-GA 492  
>miR7495a Score: 2.5 R03G\_11486

Query: 1 TTCTTG TAGTGCCTCCTTCA 20  
||||:||||\*|||\*|||||  
Sbjct: 684 AAGAGCATCTCGGTGGAAGT 665  
>miR7495a Score: 2.5 R03G\_11567

Query: 1 TTCTTG TAGTGCCTCCTTCA 20  
||||:||||\*|||\*|||||  
Sbjct: 1632 AAGAGCATCTCGGTGGAAGT 1613  
>miR7495a Score: 2.5 R03G\_10644

Query: 1 TTCTTG TAGTGCCTCCTTCA 20  
||||:||||\*|||\*|||||  
Sbjct: 360 AAGAGCATCTCGGTGGAAGT 341  
>miR7495a Score: 2.0 R03G\_09419

Query: 1 TTCTTG TAGTGCCTCCTTCA 20  
|||||||\*|||\*|||||  
Sbjct: 795 AAGAACATCTCGGTGGAAGT 776  
>miR7495a Score: 2.0 R03G\_08375

Query: 1 TTCTTG TAGTGCCTCCTTCA 20  
|\*|||||:|||||||\*|  
Sbjct: 1014 ATGAACATTACGGAGGAAAT 995  
>miR7495a Score: 2.5 R03G\_08906

Query: 1 TTCTTG TAGTGCCTCCTTCA 20  
||||:||||\*|||\*|||||  
Sbjct: 975 AAGAGCATCTCGGTGGAAGT 956  
>miR7495a Score: 2.5 R03G\_07788

Query: 1 TTCTTG TAGTGCCTCCTTCA 20  
||||:||||\*|||\*|||||  
Sbjct: 924 AAGAGCATCTCGGTGGAAGT 905  
>miR7495a Score: 2.5 R03G\_05535

Query: 1 TTCTTG TAGTGCCTCCTTCA 20

||||:||||\*|||\*|||||  
Sbjct: 360 AAGAGCATCTCGGTGGAAGT 341  
>miR7495a Score: 2.5 R03G\_04841  
Query: 1 TTCTTGAGTGCCTCCTTCA 20  
:\*|||||||:|\*  
Sbjct: 922 GGAAACATCACGGAGGAGGA 903  
>miR7495a Score: 2.0 R03G\_05161  
Query: 1 TTCTTGAGTGCCTCCTTCA 20  
|||||||\*:|||||\*  
Sbjct: 2095 AAGAACATAGCGGAGGAAGG 2076  
>miR7495a Score: 2.5 R03G\_05181  
Query: 1 TTCTTGAGTGCCTCCTTCA 20  
||||:||||\*|||\*|||||  
Sbjct: 975 AAGAGCATCTCGGTGGAAGT 956  
>miR7495a Score: 2.5 R03G\_05194  
Query: 1 TTCTTGAGTGCCTCCTTCA 20  
||||:||||\*|||\*|||||  
Sbjct: 975 AAGAGCATCTCGGTGGAAGT 956  
>miR7495a Score: 2.5 R03G\_05303  
Query: 1 TTCTTGAGTGCCTCCTTCA 20  
||||:||||\*|||\*|||||  
Sbjct: 975 AAGAGCATCTCGGTGGAAGT 956  
>miR7495a Score: 2.5 R03G\_02354  
Query: 1 TTCTTGAGTGCCTCCTTCA 20  
||||:||||\*|||\*|||||  
Sbjct: 975 AAGAGCATCTCGGTGGAAGT 956  
>miR7495a Score: 2.5 R03G\_03896  
Query: 1 TTCTTGAGTGCCTCCTTCA 20  
||||\*|||\*||||||\*||  
Sbjct: 1233 AAGAAAAACACGGAGGA-GT 1215  
>miR7495a Score: 2.5 R03G\_04104  
Query: 1 TTCTTGAGTGCCTCCTTCA 20  
||||:||||\*|||\*|||||  
Sbjct: 672 AAGAGCATCTCGGCGGAAGT 653  
>miR7495a Score: 2.5 R03G\_04110  
Query: 1 TTCTTGAGTGCCTCCTTCA 20  
||||:||||\*|||\*|||||  
Sbjct: 672 AAGAGCATCTCGGTGGAAGT 653  
>miR7495a Score: 2.5 R03G\_00779  
Query: 1 TTCTTGAGTGCCTCCTTCA 20  
||||\*|||\*||||||\*||  
Sbjct: 2835 AAGAAGATCAGGGAGGA-GT 2817  
>miR7495a Score: 2.5 R03G\_01518  
Query: 1 TTCTTGAGTGCCTCCTTCA 20  
||||:||||\*|||\*|||||

Sbjct: 348 AAGAGCATCTCGGTGGAAGT 329  
>miR7495a Score: 2.5 R03G\_01528  
Query: 1 TTCTTGTAGTGCCTCCTTCA 20  
||||:||||\*|||\*|||||  
Sbjct: 543 AAGAGCATCTCGGTGGAAGT 524  
>miR7495a Score: 2.5 R03G\_01838  
Query: 1 TTCTTGTAGTGCCTCCTTCA 20  
|||||\*|||||||\*|||\*|  
Sbjct: 486 AAGAACTTCACGGAAGAA-T 468  
>miR7495a Score: 2.5 R03G\_01923  
Query: 1 TTCTTGTAGTGCCTCCTTCA 20  
||||:||||\*|||\*|||||  
Sbjct: 924 AAGAGCATCTCGGTGGAAGT 905  
>miR7495a Score: 2.0 R03G\_02132  
Query: 1 TTCTTGTAGTGCCTCCTTCA 20  
|||||\*|||\*|||||||  
Sbjct: 175 AAGAAAAGCACGGAGGAAGT 156  
>miR7495a Score: 2.5 R03G\_02179  
Query: 1 TTCTTGTAGTGCCTCCTTCA 20  
||||\*|||:\*|||||||  
Sbjct: 3597 AAGACCATTCCGGAGGAAGT 3578  
>miR9742 Score: 0.0 R03G\_15585  
Query: 1 TGTATTGTTTGTCTGTGAGTA 23  
|||||||  
Sbjct: 2674 ACATAACAAACAAAGACACTCAT 2652  
>miR9742 Score: 0.0 R03G\_15250  
Query: 1 TGTATTGTTTGTCTGTGAGTA 23  
|||||||  
Sbjct: 2674 ACATAACAAACAAAGACACTCAT 2652  
>miR9742 Score: 0.0 R03G\_14355  
Query: 1 TGTATTGTTTGTCTGTGAGTA 23  
|||||||  
Sbjct: 925 ACATAACAAACAAAGACACTCAT 903  
>miR9742 Score: 0.0 R03G\_13867  
Query: 1 TGTATTGTTTGTCTGTGAGTA 23  
|||||||  
Sbjct: 2635 ACATAACAAACAAAGACACTCAT 2613  
>miR9742 Score: 0.0 R03G\_13920  
Query: 1 TGTATTGTTTGTCTGTGAGTA 23  
|||||||  
Sbjct: 2719 ACATAACAAACAAAGACACTCAT 2697  
>miR9742 Score: 0.0 R03G\_13749  
Query: 1 TGTATTGTTTGTCTGTGAGTA 23  
|||||||  
Sbjct: 1282 ACATAACAAACAAAGACACTCAT 1260

>miR9742 Score: 0.0 R03G\_10558  
Query: 1 TGTATTGTTTGTCTGTGAGTA 23  
|||||  
Sbjct: 472 ACATAACAAACAAAGACTCAT 450

>miR9742 Score: 2.5 R03G\_09555  
Query: 1 TGTATTGTTTGTCTGTGAGTA 23  
|||||\*|||:|||||\*|  
Sbjct: 1308 ACATAACCGACAGAGACTC-T 1287

>miR9742 Score: 0.0 R03G\_09965  
Query: 1 TGTATTGTTTGTCTGTGAGTA 23  
|||||  
Sbjct: 2719 ACATAACAAACAAAGACTCAT 2697

>miR9742 Score: 2.2 R03G\_10158  
Query: 1 TGTATTGTTTGTCTGTGAGTA 23  
|||||\*|||||:||||\*|||  
Sbjct: 72 ACATAAAAAACAGAGAC-TTCAT 51

>miR9742 Score: 0.0 R03G\_05619  
Query: 1 TGTATTGTTTGTCTGTGAGTA 23  
|||||  
Sbjct: 862 ACATAACAAACAAAGACTCAT 840

>miR9742 Score: 0.0 R03G\_06427  
Query: 1 TGTATTGTTTGTCTGTGAGTA 23  
|||||  
Sbjct: 2311 ACATAACAAACAAAGACTCAT 2289

>miR9742 Score: 0.0 R03G\_06428  
Query: 1 TGTATTGTTTGTCTGTGAGTA 23  
|||||  
Sbjct: 1813 ACATAACAAACAAAGACTCAT 1791

>miR9742 Score: 0.0 R03G\_06442  
Query: 1 TGTATTGTTTGTCTGTGAGTA 23  
|||||  
Sbjct: 3376 ACATAACAAACAAAGACTCAT 3354

>miR9742 Score: 2.5 R03G\_06545  
Query: 1 TGTATTGTTTGTCTGTGAGTA 23  
\*|||:|||||\*|\*|||  
Sbjct: 957 TTATAACAGACAAAGACTC-CAT 936

>miR9742 Score: 0.0 R03G\_05272  
Query: 1 TGTATTGTTTGTCTGTGAGTA 23  
|||||  
Sbjct: 2719 ACATAACAAACAAAGACTCAT 2697

>miR9742 Score: 2.0 R03G\_05368  
Query: 1 TGTATTGTTTGTCTGTGAGTA 23  
|||||\*||\*|\*||  
Sbjct: 1939 ACATAACAAACAAATACAATAAT 1917

>miR9742 Score: 2.5 R03G\_02393

Query: 1 TGTATTGTTTGTCTGTG-AGTA 23  
||||:|||||||\*||||\*||  
Sbjct: 383 ACATGACAAACAACGACACGTAAT 360  
>miR9742 Score: 0.0 R03G\_02691

Query: 1 TGTATTGTTTGTCTGTGAGTA 23  
|||||||  
Sbjct: 6208 ACATAACAAACAAGACTCAT 6186  
>miR9742 Score: 0.0 R03G\_02959

Query: 1 TGTATTGTTTGTCTGTGAGTA 23  
|||||||  
Sbjct: 2719 ACATAACAAACAAGACTCAT 2697  
>miR9742 Score: 0.0 R03G\_03547

Query: 1 TGTATTGTTTGTCTGTGAGTA 23  
|||||||  
Sbjct: 2719 ACATAACAAACAAGACTCAT 2697  
>miR9742 Score: 0.0 R03G\_04114

Query: 1 TGTATTGTTTGTCTGTGAGTA 23  
|||||||  
Sbjct: 2719 ACATAACAAACAAGACTCAT 2697  
>miR9742 Score: 0.0 R03G\_00306

Query: 1 TGTATTGTTTGTCTGTGAGTA 23  
|||||||  
Sbjct: 1168 ACATAACAAACAAGACTCAT 1146  
>miR9742 Score: 0.0 R03G\_01613

Query: 1 TGTATTGTTTGTCTGTGAGTA 23  
|||||||  
Sbjct: 970 ACATAACAAACAAGACTCAT 948  
>miR9742 Score: 2.0 R03G\_02099

Query: 1 TGTATTGTTTGTCTGTGA-GTA 23  
||||||:|:|||||\*||  
Sbjct: 1855 ACATAACGAATAAAGACAGTCCAT 1832  
>miR9742 Score: 0.0 R03G\_02221

Query: 1 TGTATTGTTTGTCTGTGAGTA 23  
|||||||  
Sbjct: 2641 ACATAACAAACAAGACTCAT 2619  
>miR9742 Score: 0.0 R03G\_17371

Query: 1 TGTATTGTTTGTCTGTGAGTA 23  
|||||||  
Sbjct: 2674 ACATAACAAACAAGACTCAT 2652  
>miR9742 Score: 0.0 R03G\_17326

Query: 1 TGTATTGTTTGTCTGTGAGTA 23  
|||||||  
Sbjct: 2551 ACATAACAAACAAGACTCAT 2529  
>miR3434-3p Score: 1.0 R03G\_17250

Query: 1 TCAGGATCAGCCAAGTTGA 19

```
|||||||*|||||||
Sbjct: 686 AGTCCTAGGCGGTTCAACT 668
>miR3434-3p Score: 0.0 R03G_17254
Query: 1 TCAGGATCAGCCAAGTTGA 19
|||||||
Sbjct: 686 AGTCCTAGTCGGTTCAACT 668
>miR3434-3p Score: 0.0 R03G_17201
Query: 1 TCAGGATCAGCCAAGTTGA 19
|||||||
Sbjct: 683 AGTCCTAGTCGGTTCAACT 665
>miR3434-3p Score: 1.0 R03G_17220
Query: 1 TCAGGATCAGCCAAGTTGA 19
|||||||*|||||||
Sbjct: 692 AGTCCTAGGCGGTTCAACT 674
>miR3434-3p Score: 1.0 R03G_16903
Query: 1 TCAGGATCAGCCAAGTTGA 19
|||||||*|||||||
Sbjct: 620 AGTCCTAGGCGGTTCAACT 602
>miR3434-3p Score: 1.0 R03G_16358
Query: 1 TCAGGATCAGCCAAGTTGA 19
||||*|||||||
Sbjct: 515 AGTCCCAGTCGGTTCAACT 497
>miR3434-3p Score: 1.0 R03G_16365
Query: 1 TCAGGATCAGCCAAGTTGA 19
|||||||*|||||||
Sbjct: 686 AGTCCTAGGCGGTTCAACT 668
>miR3434-3p Score: 2.0 R03G_16217
Query: 1 TCAGGATCAGCCAAGTTGA 19
||||:|*|||||||*|
Sbjct: 701 AGTCTTTGTCGGTTCAAGT 683
>miR3434-3p Score: 2.0 R03G_15938
Query: 1 TCAGGATCAGCCAAGTTGA 19
||||:|:|||||||:|:|
Sbjct: 608 AGTCTTGGTCGGTTTAGCT 590
>miR3434-3p Score: 2.5 R03G_15989
Query: 1 TCAGGATCAGCCAAGTTG-A 19
||||:|*||:|||||||*|
Sbjct: 1049 AGTCTTCGTTGGTTCAACAT 1030
>miR3434-3p Score: 2.5 R03G_15543
Query: 1 TCAGGATCAGCCAAGTTGA 19
||||:||||:|*||||||*|
Sbjct: 107 AGTCTTAGTTTGTTCAGT 89
>miR3434-3p Score: 1.0 R03G_14562
Query: 1 TCAGGATCAGCCAAGTTGA 19
|||||||*|||||||
```



Sbjct: 623 AGTCCTAGGCGGTTCAACT 605  
>miR3434-3p Score: 2.5 R03G\_14665  
Query: 1 TCAGGATCAGCCAAGTTGA 19  
\*|||\*|||||\*|||||  
Sbjct: 983 CGTCGTAGTCGTTTCAACT 965  
>miR3434-3p Score: 2.5 R03G\_14694  
Query: 1 TCAGGATCAGCCAAGTTGA 19  
|||||||\*||\*:  
Sbjct: 980 AGTCCTAGTCGGGTCTGCT 962  
>miR3434-3p Score: 2.5 R03G\_14156  
Query: 1 TCAGGATCAGCCAAGTTGA 19  
\*|||:||||\*|||||\*|  
Sbjct: 671 CGTCTTAGTGGGTTCAA-T 654  
>miR3434-3p Score: 2.5 R03G\_14338  
Query: 1 TCAGGATCAGCCAAGTTGA 19  
|||:||||\*|||||  
Sbjct: 662 AGTTTTAGTTAGTTCAACT 644  
>miR3434-3p Score: 0.0 R03G\_13449  
Query: 1 TCAGGATCAGCCAAGTTGA 19  
|||||||  
Sbjct: 686 AGTCCTAGTCGGTTC AACT 668  
>miR3434-3p Score: 0.0 R03G\_12967  
Query: 1 TCAGGATCAGCCAAGTTGA 19  
|||||||  
Sbjct: 686 AGTCCTAGTCGGTTC AACT 668  
>miR3434-3p Score: 2.0 R03G\_13067  
Query: 1 TCAGGATCAGCCAAGTTGA 19  
|||:||:|||||||\*|  
Sbjct: 683 AGTTCTGGTTCGGTTCAG-T 666  
>miR3434-3p Score: 0.0 R03G\_11978  
Query: 1 TCAGGATCAGCCAAGTTGA 19  
|||||||  
Sbjct: 539 AGTCCTAGTCGGTTC AACT 521  
>miR3434-3p Score: 2.5 R03G\_11115  
Query: 1 TCAGGATCAGCCAAGTTGA 19  
||||:||||\*|||||\*  
Sbjct: 161 AGTCTTAGTTAGTTCAACA 143  
>miR3434-3p Score: 1.5 R03G\_11790  
Query: 1 TCAGGATCAGCCAAGTTGA 19  
\*|||||||\*|||||  
Sbjct: 1256 TGTCCTAGTCAGTTCAACT 1238  
>miR3434-3p Score: 1.0 R03G\_11821  
Query: 1 TCAGGATCAGCCAAGTTGA 19  
|||:||:|||||||  
Sbjct: 2222 AGTTCTGGTTCGGTTC AACT 2204

>miR3434-3p Score: 0.0 R03G\_10533  
Query: 1 TCAGGATCAGCCAAGTTGA 19  
|||||  
Sbjct: 686 AGTCCTAGTCGGTTCAACT 668

>miR3434-3p Score: 1.0 R03G\_10538  
Query: 1 TCAGGATCAGCCAAGTTGA 19  
|||||\*|||||  
Sbjct: 644 AGTCCTAGGCGGTTCAACT 626

>miR3434-3p Score: 2.5 R03G\_10672  
Query: 1 TCAGGATCAGCCAAGTTGA 19  
|||||:|||||\*|\*  
Sbjct: 623 AGTCCTAGTTGGTTCTAAA 605

>miR3434-3p Score: 0.0 R03G\_10730  
Query: 1 TCAGGATCAGCCAAGTTGA 19  
|||||  
Sbjct: 686 AGTCCTAGTCGGTTCAACT 668

>miR3434-3p Score: 0.0 R03G\_10748  
Query: 1 TCAGGATCAGCCAAGTTGA 19  
|||||  
Sbjct: 686 AGTCCTAGTCGGTTCAACT 668

>miR3434-3p Score: 2.2 R03G\_09445  
Query: 1 TCAGGATCAGCCAAGTTGA 19  
|||\*|||||\*|||||:|  
Sbjct: 104 AGTCATAGTCGTTTCAATT 86

>miR3434-3p Score: 2.5 R03G\_08291  
Query: 1 TCAGGATCAGCCAAGTTGA 19  
||||\*|||:|\*|||||  
Sbjct: 401 AGTCCAAGTTAGTTCAACT 383

>miR3434-3p Score: 0.0 R03G\_09174  
Query: 1 TCAGGATCAGCCAAGTTGA 19  
|||||  
Sbjct: 683 AGTCCTAGTCGGTTCAACT 665

>miR3434-3p Score: 1.8 R03G\_06992  
Query: 1 TCAGGATCAGCCAAGTTGA 19  
:|||||:|\*|||||  
Sbjct: 461 GGCCTAGTTGTTTCAACT 443

>miR3434-3p Score: 0.0 R03G\_07736  
Query: 1 TCAGGATCAGCCAAGTTGA 19  
|||||  
Sbjct: 686 AGTCCTAGTCGGTTCAACT 668

>miR3434-3p Score: 0.0 R03G\_07861  
Query: 1 TCAGGATCAGCCAAGTTGA 19  
|||||  
Sbjct: 686 AGTCCTAGTCGGTTCAACT 668

>miR3434-3p Score: 0.0 R03G\_07863



|||||\*|||\*|||||\*|  
Sbjct: 647 AGTCCTTGTCTGTTCAA-T 630  
>miR3434-3p Score: 2.5 R03G\_00473  
Query: 1 TCAGGATCAGCCAAGTTGA 19  
|||:|||||\*||||||\*\*  
Sbjct: 986 AGTTCTAGTAGGTTCAAGA 968  
>miR3434-3p Score: 2.5 R03G\_00996  
Query: 1 TCAGGATCAGCCAAGTTGA 19  
||||:\*|||:||||||\*|  
Sbjct: 584 AGTCTAAGTTGGTTCAAAT 566  
>miR3434-3p Score: 2.5 R03G\_01084  
Query: 1 TCAGGATCAGCCAAGTTGA 19  
||||\*|||:\*|||||||  
Sbjct: 401 AGTCCAAGTTAGTTCAACT 383  
>miR3434-3p Score: 2.5 R03G\_01089  
Query: 1 TCAGGATCAGCCAAGTTGA 19  
\*|||||||:||||:|\*\*  
Sbjct: 6191 TGCCTAGTTGGTTTAAGA 6173  
>miR3434-3p Score: 2.5 R03G\_01571  
Query: 1 TCAGGATCAGCCAAGTTGA 19  
|||::|||||\*||||:|  
Sbjct: 1736 AGTTTTAGTCGTTTCAGCT 1718  
>miR3434-3p Score: 1.5 R03G\_17108  
Query: 1 TCAGGATCAGCCAAGTTG-A 19  
||||:|||||||\*|||\*|  
Sbjct: 902 AGTCTTAGTCGGTTCAAGGT 883  
>miR4348c Score: 2.5 R03G\_11064  
Query: 1 TGTTAAACCTTGGAAGAGACCA 22  
\*:|||||||\*||\*||  
Sbjct: 1278 CTAATTTGGAACCTTCCCTCGT 1257  
>miR4348c Score: 2.5 R03G\_09637  
Query: 1 TGTTAAACCTTGGAAGAGACCA 22  
|||:|\*||||:||||\*|||  
Sbjct: 966 ACAGTTCGGAACCTTCTCCGGT 945  
>miR1870-5p Score: 0.0 R03G\_16818  
Query: 1 TTGCTGAATGGACCAGTGGCAT 22  
|||||||  
Sbjct: 1426 AACGACTTACCTGGTCACCGTA 1405  
>miR1870-5p Score: 0.0 R03G\_16797  
Query: 1 TTGCTGAATGGACCAGTGGCAT 22  
|||||||  
Sbjct: 685 AACGACTTACCTGGTCACCGTA 664  
>miR1870-5p Score: 2.0 R03G\_16800  
Query: 1 TTGCTGAATGGACCAGTGGCAT 22  
||||||\*|:|||||||

Sbjct: 1684 AACGACTCGCTTGGTCACCGTA 1663  
>miR1870-5p Score: 0.0 R03G\_15265  
Query: 1 TTGCTGAATGGACCAGTGGCAT 22  
|||||

Sbjct: 1684 AACGACTTACCTGGTCACCGTA 1663  
>miR1870-5p Score: 0.0 R03G\_15266  
Query: 1 TTGCTGAATGGACCAGTGGCAT 22  
|||||

Sbjct: 1684 AACGACTTACCTGGTCACCGTA 1663  
>miR1870-5p Score: 0.0 R03G\_15268  
Query: 1 TTGCTGAATGGACCAGTGGCAT 22  
|||||

Sbjct: 1684 AACGACTTACCTGGTCACCGTA 1663  
>miR1870-5p Score: 0.0 R03G\_14352  
Query: 1 TTGCTGAATGGACCAGTGGCAT 22  
|||||

Sbjct: 1684 AACGACTTACCTGGTCACCGTA 1663  
>miR1870-5p Score: 0.0 R03G\_13217  
Query: 1 TTGCTGAATGGACCAGTGGCAT 22  
|||||

Sbjct: 1684 AACGACTTACCTGGTCACCGTA 1663  
>miR1870-5p Score: 0.0 R03G\_13219  
Query: 1 TTGCTGAATGGACCAGTGGCAT 22  
|||||

Sbjct: 1684 AACGACTTACCTGGTCACCGTA 1663  
>miR1870-5p Score: 0.0 R03G\_13222  
Query: 1 TTGCTGAATGGACCAGTGGCAT 22  
|||||

Sbjct: 1678 AACGACTTACCTGGTCACCGTA 1657  
>miR1870-5p Score: 1.0 R03G\_13225  
Query: 1 TTGCTGAATGGACCAGTGGCAT 22  
|||||:|:|||||

Sbjct: 1696 AACGACTTGCTTGGTCACCGTA 1675  
>miR1870-5p Score: 1.0 R03G\_11967  
Query: 1 TTGCTGAATGGACCAGTGGCAT 22  
|||||:|:|||||

Sbjct: 1696 AACGACTTGCTTGGTCACCGTA 1675  
>miR1870-5p Score: 2.5 R03G\_08855  
Query: 1 TTGCTGAATGGACCAGTGGCAT 22  
|:|||||\*||||\*|

Sbjct: 935 AGTGACTTACCTGGACACCGCA 914  
>miR1870-5p Score: 0.0 R03G\_05640  
Query: 1 TTGCTGAATGGACCAGTGGCAT 22  
|||||

Sbjct: 1432 AACGACTTACCTGGTCACCGTA 1411

>miR1870-5p Score: 2.5 R03G\_05952  
Query: 1 TTGCTGAATGGACCAGTGGCAT 22  
|||||\*|:|:||||:|||||  
Sbjct: 1564 AACGACTCGCTTGGTTACCGTA 1543

>miR1870-5p Score: 0.0 R03G\_03992  
Query: 1 TTGCTGAATGGACCAGTGGCAT 22  
|||||  
Sbjct: 415 AACGACTTACCTGGTCACCGTA 394

>miR1870-5p Score: 0.0 R03G\_04121  
Query: 1 TTGCTGAATGGACCAGTGGCAT 22  
|||||  
Sbjct: 1684 AACGACTTACCTGGTCACCGTA 1663

>miR2905 Score: 0.0 R03G\_15711  
Query: 1 TACTGTAGCCGACAAAGGCA 20  
|||||  
Sbjct: 2394 ATGACATCGGCTGTTTCCGT 2375

>miR2905 Score: 0.0 R03G\_13796  
Query: 1 TACTGTAGCCGACAAAGGCA 20  
|||||  
Sbjct: 2394 ATGACATCGGCTGTTTCCGT 2375

>miR2905 Score: 0.0 R03G\_11521  
Query: 1 TACTGTAGCCGACAAAGGCA 20  
|||||  
Sbjct: 1356 ATGACATCGGCTGTTTCCGT 1337

>miR2905 Score: 2.0 R03G\_11026  
Query: 1 TACTGTAGCCGACAAAGGCA 20  
|||::|:|:|:|:|  
Sbjct: 676 ATGGTATCGGTTGTTTTCGT 657

>miR2905 Score: 0.0 R03G\_09539  
Query: 1 TACTGTAGCCGACAAAGGCA 20  
|||||  
Sbjct: 2394 ATGACATCGGCTGTTTCCGT 2375

>miR2905 Score: 1.8 R03G\_03627  
Query: 1 TACTGTAGCCGACAAAGGCA 20  
:|||||\*||\*|  
Sbjct: 411 GTGACATCGGCTGTTACCTT 392

>miR2905 Score: 1.8 R03G\_01708  
Query: 1 TACTGTAGCCGACAAAGGCA 20  
:|||||\*||\*|  
Sbjct: 411 GTGACATCGGCTGTTACCTT 392

>miR5557-3p Score: 1.0 R03G\_17259  
Query: 1 TGCTTGCATTATCTTGTTGA 20  
||||\*|  
Sbjct: 130 ACGAAAGTAATAGAACAACACT 111

>miR5557-3p Score: 0.0 R03G\_17249

Query: 1 TGCTTGCATTATCTTGTTGA 20  
|||||  
Sbjct: 649 ACGAACGTAATAGAACAACACT 630  
>miR5557-3p Score: 2.5 R03G\_16179  
Query: 1 TGCTTGCATTATCTTGTTGA 20  
|||||\*:\*  
Sbjct: 463 ACGAACGAGATAGAACA-CG 445  
>miR5557-3p Score: 0.0 R03G\_14978  
Query: 1 TGCTTGCATTATCTTGTTGA 20  
|||||  
Sbjct: 130 ACGAACGTAATAGAACAACACT 111  
>miR5557-3p Score: 0.0 R03G\_14363  
Query: 1 TGCTTGCATTATCTTGTTGA 20  
|||||  
Sbjct: 682 ACGAACGTAATAGAACAACACT 663  
>miR5557-3p Score: 0.0 R03G\_14547  
Query: 1 TGCTTGCATTATCTTGTTGA 20  
|||||  
Sbjct: 130 ACGAACGTAATAGAACAACACT 111  
>miR5557-3p Score: 1.0 R03G\_13921  
Query: 1 TGCTTGCATTATCTTGTTGA 20  
||||\*  
Sbjct: 130 ACGAAGGTAATAGAACAACACT 111  
>miR5557-3p Score: 2.5 R03G\_13952  
Query: 1 TGCTTGCATTATCTTGTTGA 20  
|||||\*|||\*  
Sbjct: 3724 ACGAACGTAATCGAACGTCA 3705  
>miR5557-3p Score: 2.0 R03G\_13954  
Query: 1 TGCTTGCATTATCTTGTTGA 20  
|||||\*|||\*  
Sbjct: 468 ACGAACGTAATAGGAGAGTT 449  
>miR5557-3p Score: 0.0 R03G\_13863  
Query: 1 TGCTTGCATTATCTTGTTGA 20  
|||||  
Sbjct: 424 ACGAACGTAATAGAACAACACT 405  
>miR5557-3p Score: 0.0 R03G\_13270  
Query: 1 TGCTTGCATTATCTTGTTGA 20  
|||||  
Sbjct: 724 ACGAACGTAATAGAACAACACT 705  
>miR5557-3p Score: 0.0 R03G\_11527  
Query: 1 TGCTTGCATTATCTTGTTGA 20  
|||||  
Sbjct: 130 ACGAACGTAATAGAACAACACT 111  
>miR5557-3p Score: 2.5 R03G\_11925  
Query: 1 TGCTTGCATTATCTTGTTGA 20

|||\*|||||\*|||||\*|  
Sbjct: 160 ACGTACGTAAAAGAACAAAT 141  
>miR5557-3p Score: 2.5 R03G\_10608  
Query: 1 TGCTTGCATTATCTTGTTG-A 20  
|||||||:|:||||\*||\*|  
Sbjct: 8947 ACGAACGTAGTGAAGAACGT 8927  
>miR5557-3p Score: 1.0 R03G\_10734  
Query: 1 TGCTTGCATTATCTTGTTGA 20  
|||||||\*|||||  
Sbjct: 130 ACGAACGTAATACAACAACT 111  
>miR5557-3p Score: 0.0 R03G\_10774  
Query: 1 TGCTTGCATTATCTTGTTGA 20  
|||||||  
Sbjct: 691 ACGAACGTAATAGAACAACT 672  
>miR5557-3p Score: 1.0 R03G\_10869  
Query: 1 TGCTTGCATTATCTTGTTGA 20  
|||||||\*|||||  
Sbjct: 130 ACGAACGTAATAGTACAAC 111  
>miR5557-3p Score: 2.5 R03G\_05820  
Query: 1 TGCTTGCATTATCTTGTTGA 20  
\*|||||||:||||\*||\*|  
Sbjct: 507 CCGAACGTAGTAGAAGAAGT 488  
>miR5557-3p Score: 0.0 R03G\_05935  
Query: 1 TGCTTGCATTATCTTGTTGA 20  
|||||||  
Sbjct: 130 ACGAACGTAATAGAACAACT 111  
>miR5557-3p Score: 2.5 R03G\_04254  
Query: 1 TGCTTGCATTATCTTGTTGA 20  
|||\*|\*|||||||\*  
Sbjct: 487 ACGATCTTAATAGAACAACC 468  
>miR5557-3p Score: 0.0 R03G\_04790  
Query: 1 TGCTTGCATTATCTTGTTGA 20  
|||||||  
Sbjct: 130 ACGAACGTAATAGAACAACT 111  
>miR5557-3p Score: 1.5 R03G\_05423  
Query: 1 TGCTTGCATTATCTTGTTGA 20  
||||:||||||\*|||||  
Sbjct: 130 ACGAATGTAATAGATCAACT 111  
>miR5557-3p Score: 1.0 R03G\_03593  
Query: 1 TGCTTGCATTATCTTGTTGA 20  
|||:||||:|||||||  
Sbjct: 130 ACGGACGTGATAGAACAACT 111  
>miR5557-3p Score: 0.0 R03G\_03626  
Query: 1 TGCTTGCATTATCTTGTTGA 20  
|||||||



Sbjct: 130 ACGAACGTAATAGAACAAC 111  
>miR5557-3p Score: 2.5 R03G\_00114  
Query: 1 TGCTTGCATTATCTTGTTGA 20  
||\*|||||||:|||||||  
Sbjct: 466 ACTAACGTAATGAAACAAC 447  
>miR5557-3p Score: 0.0 R03G\_00678  
Query: 1 TGCTTGCATTATCTTGTTGA 20  
|||||||  
Sbjct: 94 ACGAACGTAATAGAACAAC 75  
>miR5557-3p Score: 0.0 R03G\_01589  
Query: 1 TGCTTGCATTATCTTGTTGA 20  
|||||||  
Sbjct: 130 ACGAACGTAATAGAACAAC 111  
>miR5557-3p Score: 1.0 R03G\_17459  
Query: 1 TGCTTGCATTATCTTGTTGA 20  
|||||||\*|||||||  
Sbjct: 130 ACGAACGTAATACAACAAC 111  
>miR5557-3p Score: 0.0 R03G\_17276  
Query: 1 TGCTTGCATTATCTTGTTGA 20  
|||||||  
Sbjct: 814 ACGAACGTAATAGAACAAC 795  
>miR8135 Score: 2.5 R03G\_16054  
Query: 1 AGGATTTATGCTTGGTGAT 19  
||:||:|\*|||||||\*|  
Sbjct: 2442 TCTTAGATTCGAACCAC-A 2425  
>miR8135 Score: 2.5 R03G\_15106  
Query: 1 AGGATTTATGCTTGGTGAT 19  
|\*||:|||||||:|||\*  
Sbjct: 300 TACTGAATACGAACTACTT 282  
>miR8135 Score: 2.0 R03G\_13681  
Query: 1 AGGATTTATGCTTGGTGAT 19  
\*|||||||\*|||  
Sbjct: 280 GCCTAAATACGAACGGCTA 262  
>miR8135 Score: 2.5 R03G\_12399  
Query: 1 AGGATTTATGCTTGGTGAT 19  
\*|:||||\*|||||||\*|  
Sbjct: 495 ACTTAAATTCGAACCAC-A 478  
>miR8135 Score: 2.5 R03G\_11749  
Query: 1 AGGATTTATGCTTGGTGAT 19  
\*|:|||||||:||:|:|  
Sbjct: 1590 ACTTAAATACGGACTATTA 1572  
>miR8135 Score: 2.0 R03G\_05601  
Query: 1 AGGATTTATGCTTGGTGA-T 19  
|||\*|||||||:|||||\*|  
Sbjct: 1131 TCCCAAATACGGACCACTTA 1112

>miR8135 Score: 2.0 R03G\_05297  
Query: 1 AGGATTTATGCTTGGTGAT 19  
|:||||\*|||||||\*|  
Sbjct: 2621 TTCTAAAGACGAACCACAA 2603

>miR5241a Score: 2.0 R03G\_17221  
Query: 1 TGATGATGGAAGAGGGAAT 19  
|||||||\*|:||||\*  
Sbjct: 857 ACTACTACCTTGTCCTTT 839

>miR5241a Score: 2.0 R03G\_16861  
Query: 1 TGATGATGGAAGAGGGAAT 19  
||||||:|:||||\*|  
Sbjct: 421 ACTACTATTTTTCCCT-A 404

>miR5241a Score: 2.5 R03G\_16170  
Query: 1 TGATGATGGAAGAGGGAAT 19  
|||||||\*|:||||\*|  
Sbjct: 119 ACTACTACTCTTCCCTGA 101

>miR5241a Score: 2.5 R03G\_16310  
Query: 1 TGATGATGGAAGAGGGAAT 19  
|||||||\*|:|\*|  
Sbjct: 1248 ACTACTACCTTCTCTTGAA 1230

>miR5241a Score: 2.0 R03G\_16076  
Query: 1 TGATGATGGAAGAGGGAAT 19  
|||||||\*|:||||\*  
Sbjct: 857 ACTACTACCTTGTCCTTT 839

>miR5241a Score: 2.0 R03G\_14908  
Query: 1 TGATGATGGAAGAGGGAAT 19  
|||||||\*|:||||\*  
Sbjct: 857 ACTACTACCTTGTCCTTT 839

>miR5241a Score: 1.8 R03G\_15056  
Query: 1 TGATGATGGAAGAGGGAAT 19  
\*||:||||:|||||||:  
Sbjct: 445 CTGCTACTTTCTCCCTTG 427

>miR5241a Score: 2.0 R03G\_14748  
Query: 1 TGATGATGGAAGAGGGAAT 19  
|||||||\*|:||||\*  
Sbjct: 857 ACTACTACCTTGTCCTTT 839

>miR5241a Score: 2.0 R03G\_14037  
Query: 1 TGATGATGGAAGAGGGAAT-T 19  
|||||||\*|||:||\*|  
Sbjct: 213 ACTACTACCTGCTCTCTTA 194

>miR5241a Score: 2.0 R03G\_13483  
Query: 1 TGATGATGGAAGAGGGAAT 19  
|||||||\*|:||||\*  
Sbjct: 857 ACTACTACCTTGTCCTTT 839

>miR5241a Score: 2.0 R03G\_13707

Query: 1 TGATGATGGAAGAGGGAAT 19  
|||||||\*|:||||\*  
Sbjct: 857 ACTACTACCTTGTTTCCTTT 839  
>miR5241a Score: 2.0 R03G\_12949  
Query: 1 TGATGATGGAAGAGGGAAT 19  
|||:|||:|||||:||||\*  
Sbjct: 721 ACTGCTATCTTCTTCCTTT 703  
>miR5241a Score: 2.5 R03G\_13051  
Query: 1 TGATGATGGAAGAGGGAAT 19  
|\*|||||||:||||\*\*  
Sbjct: 262 AGTACTACCTTCTTCCTCT 244  
>miR5241a Score: 2.0 R03G\_13265  
Query: 1 TGATGATGGAAGAGGGAAT 19  
|||||||\*|:||||\*  
Sbjct: 857 ACTACTACCTTGTTTCCTTT 839  
>miR5241a Score: 2.0 R03G\_11990  
Query: 1 TGATGATGGAAGAGGGAAT 19  
|||||||\*|:||||\*  
Sbjct: 857 ACTACTACCTTGTTTCCTTT 839  
>miR5241a Score: 2.0 R03G\_12352  
Query: 1 TGATGATGGAAGAGGGAAT 19  
|||||||\*|:||||\*  
Sbjct: 857 ACTACTACCTTGTTTCCTTT 839  
>miR5241a Score: 2.5 R03G\_10250  
Query: 1 TGATGATGGAAGAGGGAAT 19  
|||:\*|||||||:||||\*  
Sbjct: 256 ACTGATACCTTCTTCCTTT 238  
>miR5241a Score: 2.2 R03G\_09758  
Query: 1 TGATGATGGAAGAGGGAAT 19  
|||||||:|||||:|:|:  
Sbjct: 1978 ACTACTGTCTTCTTCTTTG 1960  
>miR5241a Score: 2.0 R03G\_09951  
Query: 1 TGATGATGGAAGAGGGAAT 19  
|||||||:|\*|||:||||  
Sbjct: 126 ACTACTACTTCCTCTCTTA 108  
>miR5241a Score: 2.0 R03G\_10082  
Query: 1 TGATGATGGAAGAGGGAAT 19  
|||||||\*|:||||\*  
Sbjct: 857 ACTACTACCTTGTTTCCTTT 839  
>miR5241a Score: 2.0 R03G\_08729  
Query: 1 TGATGATGGAAGAGGGAAT 19  
|||||||\*|:||||\*  
Sbjct: 857 ACTACTACCTTGTTTCCTTT 839  
>miR5241a Score: 2.0 R03G\_07318  
Query: 1 TGATGATGGAAGAGGGAAT 19

|||||||\*|:||||\*  
Sbjct: 857 ACTACTACCTTGTTCCCTTT 839  
>miR5241a Score: 2.5 R03G\_07775  
Query: 1 TGATGATGGAAGAGGGAAT 19  
\*|||||||:|:|\*\*  
Sbjct: 1423 TCTACTACCTTCTTCTTCT 1405  
>miR5241a Score: 2.0 R03G\_07919  
Query: 1 TGATGATGGAAGAGGGAAT 19  
|||||||\*|:||||\*  
Sbjct: 857 ACTACTACCTTGTTCCCTTT 839  
>miR5241a Score: 2.5 R03G\_05571  
Query: 1 TGATGATGGAAGAGGGAAT 19  
|:||||\*||||:|||\*|  
Sbjct: 343 ATTACTAGCTTCTTCCT-A 326  
>miR5241a Score: 2.0 R03G\_05692  
Query: 1 TGATGATGGAAGAGGGAAT 19  
|||||||\*|:||||\*  
Sbjct: 857 ACTACTACCTTGTTCCCTTT 839  
>miR5241a Score: 2.5 R03G\_05801  
Query: 1 TGATGATGGAAGAGGGAAT 19  
|||||\*|||\*|||:||||  
Sbjct: 465 ACTACTTCCTGCTCTCTTA 447  
>miR5241a Score: 2.2 R03G\_05858  
Query: 1 TGATGATGGAAGAGGGAAT 19  
||||:|||||||:\*\*\*|  
Sbjct: 694 ACTATTACCTTCTCTATTG 676  
>miR5241a Score: 2.5 R03G\_06122  
Query: 1 TGATGATGGAAGAGGGAAT 19  
|||||||:||\*|||\*||||  
Sbjct: 982 ACTACTATCTACTCACTTA 964  
>miR5241a Score: 2.5 R03G\_06182  
Query: 1 TGATGATGGAAGAGGGAAT-T 19  
|||||||:|||||||\*|\*\*|  
Sbjct: 421 ACTACTATCTTCTCCATCCA 402  
>miR5241a Score: 2.0 R03G\_06439  
Query: 1 TGATGATGGAAGAGGGAAT 19  
|||||||\*|:||||\*  
Sbjct: 854 ACTACTACCTTGTTCCCTTT 836  
>miR5241a Score: 2.0 R03G\_05090  
Query: 1 TGATGATGGAAGAGGGAAT 19  
|||||||\*|:||||\*  
Sbjct: 857 ACTACTACCTTGTTCCCTTT 839  
>miR5241a Score: 2.0 R03G\_05091  
Query: 1 TGATGATGGAAGAGGGAAT 19  
|||||||\*|:||||\*

Sbjct: 857 ACTACTACCTTGTTTCCTTT 839  
>miR5241a Score: 2.0 R03G\_05128  
Query: 1 TGATGATGGAAGAGGGAAT 19  
|||||\*|:||||\*  
Sbjct: 857 ACTACTACCTTGTTTCCTTT 839  
>miR5241a Score: 2.0 R03G\_05129  
Query: 1 TGATGATGGAAGAGGGAAT 19  
|||||\*|:||||\*  
Sbjct: 857 ACTACTACCTTGTTTCCTTT 839  
>miR5241a Score: 2.2 R03G\_02765  
Query: 1 TGATGATGGAAGAGGGAAT 19  
:||||:||||:||||:||\*|  
Sbjct: 1376 GCTATTACTTTCTCTCT-A 1359  
>miR5241a Score: 2.0 R03G\_02948  
Query: 1 TGATGATGGAAGAGGGAAT 19  
|||||\*|:||||\*  
Sbjct: 857 ACTACTACCTTGTTTCCTTT 839  
>miR5241a Score: 2.0 R03G\_03722  
Query: 1 TGATGATGGAAGAGGGAAT 19  
|||||\*|:||||\*  
Sbjct: 857 ACTACTACCTTGTTTCCTTT 839  
>miR5241a Score: 2.0 R03G\_03986  
Query: 1 TGATGATGGAAGAGGGAAT 19  
|||||\*|:||||\*  
Sbjct: 857 ACTACTACCTTGTTTCCTTT 839  
>miR5241a Score: 2.0 R03G\_04027  
Query: 1 TGATGATGGAAGAGGGAAT 19  
|||||\*|:||||\*  
Sbjct: 857 ACTACTACCTTGTTTCCTTT 839  
>miR5241a Score: 2.0 R03G\_04035  
Query: 1 TGATGATGGAAGAGGGAAT 19  
|||||\*|:||||\*  
Sbjct: 857 ACTACTACCTTGTTTCCTTT 839  
>miR5241a Score: 2.0 R03G\_04050  
Query: 1 TGATGATGGAAGAGGGAAT 19  
|||:||||:||||:||||\*  
Sbjct: 1276 ACTGCTATCTTCTTCCTTT 1258  
>miR5241a Score: 2.0 R03G\_00002  
Query: 1 TGATGATGGAAGAGGGAAT 19  
|||||\*|:||||\*  
Sbjct: 857 ACTACTACCTTGTTTCCTTT 839  
>miR5241a Score: 2.0 R03G\_00301  
Query: 1 TGATGATGGAAGAGGGAAT 19  
|||:||||:||||:||||\*  
Sbjct: 2560 ACTGCTATCTTCTTCCTTT 2542

>miR5241a Score: 2.0 R03G\_00400  
Query: 1 TGATGATGGAAGAGGGAAT 19  
|||||||\*|:||||\*  
Sbjct: 857 ACTACTACCTTGTTCCCTTT 839

>miR5241a Score: 2.0 R03G\_01112  
Query: 1 TGATGATGGAAGAGGGAAT 19  
|||||||\*|:||||\*  
Sbjct: 857 ACTACTACCTTGTTCCCTTT 839

>miR5241a Score: 2.0 R03G\_01269  
Query: 1 TGATGATGGAAGAGGGAAT 19  
|||||||\*||\*|  
Sbjct: 202 ACTACTACCTTCTTACT-A 185

>miR5241a Score: 2.5 R03G\_01630  
Query: 1 TGATGATGGAAGAGGGAAT 19  
\*||||\*|||||:|\*|  
Sbjct: 474 TCTACTTCCTTCTCTCTAA 456

>miR5241a Score: 1.8 R03G\_01868  
Query: 1 TGATGATGGAAGAGGGAAT 19  
:|||||||:||||\*\*  
Sbjct: 214 GCTACTACCTTTTCCCTCT 196

>miR5241a Score: 2.5 R03G\_02199  
Query: 1 TGATGATGGAAGAGGGAAT 19  
|||:|:|:|:|:|:|  
Sbjct: 133 ACTGCTGCTTTTTCCTTTA 115

>miR5241a Score: 2.0 R03G\_17389  
Query: 1 TGATGATGGAAGAGGGAAT 19  
|||||||\*|:||||\*  
Sbjct: 857 ACTACTACCTTGTTCCCTTT 839

>miR5241a Score: 2.0 R03G\_17348  
Query: 1 TGATGATGGAAGAGGGAAT 19  
|||||||\*|:||||\*  
Sbjct: 857 ACTACTACCTTGTTCCCTTT 839

>miR5241a Score: 2.0 R03G\_17322  
Query: 1 TGATGATGGAAGAGGGAAT 19  
|||||||\*|:||||\*  
Sbjct: 857 ACTACTACCTTGTTCCCTTT 839

>miR5241a Score: 1.5 R03G\_17296  
Query: 1 TGATGATGGAAGAGGGAAT 19  
|||||||\*||\*\*|  
Sbjct: 52 ACTACTACCTTCTCCC-AA 35

>miR1068 Score: 0.0 R03G\_16557  
Query: 1 TAGCCAGTTTTGCTTGCAGGTC 22  
|||||||  
Sbjct: 418 ATCGGTCAAACGAACGTCCAG 397

>miR1068 Score: 0.0 R03G\_16132

Query: 1 TAGCCAGTTTTGCTTGCAGGTC 22  
|||||  
Sbjct: 418 ATCGGTCAAACGAACGTCCAG 397  
>miR1068 Score: 0.2 R03G\_14995  
Query: 1 TAGCCAGTTTTGCTTGCAGGTC 22  
|||||:|  
Sbjct: 418 ATCGGTCAAACGAACGTCCGG 397  
>miR1068 Score: 0.0 R03G\_15134  
Query: 1 TAGCCAGTTTTGCTTGCAGGTC 22  
|||||  
Sbjct: 460 ATCGGTCAAACGAACGTCCAG 439  
>miR1068 Score: 0.0 R03G\_12470  
Query: 1 TAGCCAGTTTTGCTTGCAGGTC 22  
|||||  
Sbjct: 418 ATCGGTCAAACGAACGTCCAG 397  
>miR1068 Score: 0.0 R03G\_11525  
Query: 1 TAGCCAGTTTTGCTTGCAGGTC 22  
|||||  
Sbjct: 418 ATCGGTCAAACGAACGTCCAG 397  
>miR1068 Score: 0.0 R03G\_09479  
Query: 1 TAGCCAGTTTTGCTTGCAGGTC 22  
|||||  
Sbjct: 418 ATCGGTCAAACGAACGTCCAG 397  
>miR1068 Score: 0.0 R03G\_09541  
Query: 1 TAGCCAGTTTTGCTTGCAGGTC 22  
|||||  
Sbjct: 418 ATCGGTCAAACGAACGTCCAG 397  
>miR1068 Score: 2.0 R03G\_06842  
Query: 1 TAGCCAGTTTTGCTTGCAGGTC 22  
:|:\*|||||:|  
Sbjct: 5311 GTTAGTCAAACGAACGTTCAG 5290  
>miR1068 Score: 0.0 R03G\_07098  
Query: 1 TAGCCAGTTTTGCTTGCAGGTC 22  
|||||  
Sbjct: 418 ATCGGTCAAACGAACGTCCAG 397  
>miR1068 Score: 0.0 R03G\_06442  
Query: 1 TAGCCAGTTTTGCTTGCAGGTC 22  
|||||  
Sbjct: 6142 ATCGGTCAAACGAACGTCCAG 6121  
>miR1068 Score: 2.5 R03G\_04655  
Query: 1 TAGCCAGTTTTGCTTGCAGGTC 22  
\*|||||:|\*|\*|  
Sbjct: 1811 TTCGGTCAAATGAAAGTACAG 1790  
>miR1068 Score: 0.0 R03G\_05271  
Query: 1 TAGCCAGTTTTGCTTGCAGGTC 22





Sbjct: 298 ACGATAGAAGGAGACTGAGTC 278  
>miR9491 Score: 0.0 R03G\_13450  
Query: 1 TGCTATCTTCCTCTGACTCAG 21  
|||||  
Sbjct: 298 ACGATAGAAGGAGACTGAGTC 278  
>miR9491 Score: 0.0 R03G\_13861  
Query: 1 TGCTATCTTCCTCTGACTCAG 21  
|||||  
Sbjct: 298 ACGATAGAAGGAGACTGAGTC 278  
>miR9491 Score: 0.0 R03G\_12951  
Query: 1 TGCTATCTTCCTCTGACTCAG 21  
|||||  
Sbjct: 298 ACGATAGAAGGAGACTGAGTC 278  
>miR9491 Score: 0.0 R03G\_12979  
Query: 1 TGCTATCTTCCTCTGACTCAG 21  
|||||  
Sbjct: 298 ACGATAGAAGGAGACTGAGTC 278  
>miR9491 Score: 0.0 R03G\_13152  
Query: 1 TGCTATCTTCCTCTGACTCAG 21  
|||||  
Sbjct: 298 ACGATAGAAGGAGACTGAGTC 278  
>miR9491 Score: 0.0 R03G\_11970  
Query: 1 TGCTATCTTCCTCTGACTCAG 21  
|||||  
Sbjct: 298 ACGATAGAAGGAGACTGAGTC 278  
>miR9491 Score: 0.0 R03G\_12087  
Query: 1 TGCTATCTTCCTCTGACTCAG 21  
|||||  
Sbjct: 298 ACGATAGAAGGAGACTGAGTC 278  
>miR9491 Score: 0.0 R03G\_12194  
Query: 1 TGCTATCTTCCTCTGACTCAG 21  
|||||  
Sbjct: 298 ACGATAGAAGGAGACTGAGTC 278  
>miR9491 Score: 0.0 R03G\_11275  
Query: 1 TGCTATCTTCCTCTGACTCAG 21  
|||||  
Sbjct: 298 ACGATAGAAGGAGACTGAGTC 278  
>miR9491 Score: 0.0 R03G\_11403  
Query: 1 TGCTATCTTCCTCTGACTCAG 21  
|||||  
Sbjct: 298 ACGATAGAAGGAGACTGAGTC 278  
>miR9491 Score: 0.0 R03G\_10555  
Query: 1 TGCTATCTTCCTCTGACTCAG 21  
|||||  
Sbjct: 298 ACGATAGAAGGAGACTGAGTC 278

>miR9491 Score: 0.0 R03G\_10560  
Query: 1 TGCTATCTTCCTCTGACTCAG 21  
|||||  
Sbjct: 298 ACGATAGAAGGAGACTGAGTC 278

>miR9491 Score: 0.0 R03G\_09376  
Query: 1 TGCTATCTTCCTCTGACTCAG 21  
|||||  
Sbjct: 298 ACGATAGAAGGAGACTGAGTC 278

>miR9491 Score: 0.0 R03G\_08612  
Query: 1 TGCTATCTTCCTCTGACTCAG 21  
|||||  
Sbjct: 298 ACGATAGAAGGAGACTGAGTC 278

>miR9491 Score: 2.0 R03G\_08632  
Query: 1 TGCTATCTTCCTCTGACTCAG 21  
\*|||||\*  
Sbjct: 523 TCGATAGAAGGAGACTAAGTG 503

>miR9491 Score: 0.0 R03G\_07104  
Query: 1 TGCTATCTTCCTCTGACTCAG 21  
|||||  
Sbjct: 298 ACGATAGAAGGAGACTGAGTC 278

>miR9491 Score: 0.0 R03G\_07305  
Query: 1 TGCTATCTTCCTCTGACTCAG 21  
|||||  
Sbjct: 298 ACGATAGAAGGAGACTGAGTC 278

>miR9491 Score: 0.0 R03G\_05630  
Query: 1 TGCTATCTTCCTCTGACTCAG 21  
|||||  
Sbjct: 298 ACGATAGAAGGAGACTGAGTC 278

>miR9491 Score: 0.0 R03G\_06416  
Query: 1 TGCTATCTTCCTCTGACTCAG 21  
|||||  
Sbjct: 298 ACGATAGAAGGAGACTGAGTC 278

>miR9491 Score: 0.0 R03G\_05280  
Query: 1 TGCTATCTTCCTCTGACTCAG 21  
|||||  
Sbjct: 298 ACGATAGAAGGAGACTGAGTC 278

>miR9491 Score: 0.0 R03G\_03103  
Query: 1 TGCTATCTTCCTCTGACTCAG 21  
|||||  
Sbjct: 298 ACGATAGAAGGAGACTGAGTC 278

>miR9491 Score: 0.0 R03G\_03988  
Query: 1 TGCTATCTTCCTCTGACTCAG 21  
|||||  
Sbjct: 298 ACGATAGAAGGAGACTGAGTC 278

>miR9491 Score: 0.0 R03G\_01203

Query: 1 TGCTATCTTCCTCTGACTCAG 21  
|||||  
Sbjct: 298 ACGATAGAAGGAGACTGAGTC 278  
>miR9491 Score: 0.0 R03G\_01718  
Query: 1 TGCTATCTTCCTCTGACTCAG 21  
|||||  
Sbjct: 298 ACGATAGAAGGAGACTGAGTC 278  
>miR2602a Score: 2.2 R03G\_17076  
Query: 1 TTCCAGTGATTGCCAGCAT 19  
::|||||:|||||:|\*|  
Sbjct: 814 GGGGTCATTAACGGTTGCA 796  
>miR2602a Score: 2.2 R03G\_16143  
Query: 1 TTCCAGTGATTGCCAGCAT 19  
|:|||||\*|||||:|:  
Sbjct: 4493 AGGGTCAGTAACGGTTGTG 4475  
>miR2602a Score: 0.5 R03G\_14983  
Query: 1 TTCCAGTGATTGCCAGCAT 19  
|||||:|||||  
Sbjct: 560 AAGGTCATTAACGGTCGTA 542  
>miR2602a Score: 2.2 R03G\_15136  
Query: 1 TTCCAGTGATTGCCAGCAT 19  
|:|||||\*|||||:|:  
Sbjct: 203 AGGGTCAGTAACGGTTGTG 185  
>miR2602a Score: 0.0 R03G\_13914  
Query: 1 TTCCAGTGATTGCCAGCAT 19  
|||||:|||||  
Sbjct: 755 AAGGTCACTAACGGTCGTA 737  
>miR2602a Score: 2.0 R03G\_13096  
Query: 1 TTCCAGTGATTGCCAGCAT 19  
|||||:|:|||||\*|||  
Sbjct: 287 AAGGTCGCTGACGGTGGTA 269  
>miR2602a Score: 0.0 R03G\_12058  
Query: 1 TTCCAGTGATTGCCAGCAT 19  
|||||:|||||  
Sbjct: 755 AAGGTCACTAACGGTCGTA 737  
>miR2602a Score: 2.2 R03G\_12181  
Query: 1 TTCCAGTGATTGCCAGCAT 19  
|:|||||\*|||||:|:  
Sbjct: 1310 AGGGTCAGTAACGGTTGTG 1292  
>miR2602a Score: 2.2 R03G\_12533  
Query: 1 TTCCAGTGATTGCCAGCAT 19  
|:|||||\*|||||:|:  
Sbjct: 3836 AGGGTCAGTAACGGTTGTG 3818  
>miR2602a Score: 2.2 R03G\_10535  
Query: 1 TTCCAGTGATTGCCAGCAT 19

|:||||\*|||||:|:  
Sbjct: 2141 AGGGTCAGTAACGGTTGTG 2123  
>miR2602a Score: 0.0 R03G\_10801  
Query: 1 TTCCAGTGATTGCCAGCAT 19  
|||||  
Sbjct: 560 AAGGTCACTAACGGTCGTA 542  
>miR2602a Score: 0.0 R03G\_09614  
Query: 1 TTCCAGTGATTGCCAGCAT 19  
|||||  
Sbjct: 86 AAGGTCACTAACGGTCGTA 68  
>miR2602a Score: 2.2 R03G\_06752  
Query: 1 TTCCAGTGATTGCCAGCAT 19  
:|||||:|:|:|\*|||  
Sbjct: 197 GAGGTCATTAATGGTAGTA 179  
>miR2602a Score: 2.2 R03G\_07028  
Query: 1 TTCCAGTGATTGCCAGCAT 19  
|:||||\*|||||:|:  
Sbjct: 3479 AGGGTCAGTAACGGTTGTG 3461  
>miR2602a Score: 2.2 R03G\_05750  
Query: 1 TTCCAGTGATTGCCAGCAT 19  
:|\*|||||:|||||\*|  
Sbjct: 309 GAGATCACTGACGGTCGGA 291  
>miR2602a Score: 2.2 R03G\_05918  
Query: 1 TTCCAGTGATTGCCAGCAT 19  
|:||||\*|||||:|:  
Sbjct: 1016 AGGGTCAGTAACGGTTGTG 998  
>miR2602a Score: 2.2 R03G\_05520  
Query: 1 TTCCAGTGATTGCCAGCAT 19  
|:||||\*|||||:|:  
Sbjct: 1163 AGGGTCAGTAACGGTTGTG 1145  
>miR2602a Score: 0.0 R03G\_02233  
Query: 1 TTCCAGTGATTGCCAGCAT 19  
|||||  
Sbjct: 284 AAGGTCACTAACGGTCGTA 266  
>miR2602a Score: 2.2 R03G\_02691  
Query: 1 TTCCAGTGATTGCCAGCAT 19  
|:||||\*|||||:|:  
Sbjct: 2942 AGGGTCAGTAACGGTTGTG 2924  
>miR2602a Score: 1.0 R03G\_03556  
Query: 1 TTCCAGTGATTGCCAGCAT 19  
|||||\*|||||  
Sbjct: 560 AAGGTCACTAACAGTCGTA 542  
>miR2602a Score: 0.5 R03G\_03583  
Query: 1 TTCCAGTGATTGCCAGCAT 19  
|||||\*|

Sbjct: 560 AAGGTCACCTAACGGTCGCA 542  
>miR2602a Score: 2.0 R03G\_03950  
Query: 1 TTCCAGTGATTGCCAGCAT 19  
\*||||:|\*|||||||  
Sbjct: 220 CAGGTTACGAACGGTCGTA 202  
>miR2602a Score: 2.5 R03G\_00540  
Query: 1 TTCCAGTGATTGCCAGCAT 19  
:|\*|||||||:|\*:  
Sbjct: 346 GAGGACCTAACGGTTG-G 329  
>miR2602a Score: 2.5 R03G\_00714  
Query: 1 TTCCAGTGATTGCCAGCAT 19  
\*:|||||\*|:|||||||  
Sbjct: 1934 CGGGTCACAGACGGTCGTA 1916  
>miR2602a Score: 2.5 R03G\_01041  
Query: 1 TTCCAGTGATTGCCAGCAT 19  
\*||||:|\*|||||||\*|  
Sbjct: 452 TAGGTTAATAACGGTCG-A 435  
>miR2602a Score: 0.0 R03G\_17462  
Query: 1 TTCCAGTGATTGCCAGCAT 19  
|||||||  
Sbjct: 887 AAGGTCACCTAACGGTCGTA 869  
>miR2602a Score: 2.2 R03G\_17383  
Query: 1 TTCCAGTGATTGCCAGCAT 19  
|:|||||\*|||||||:|:  
Sbjct: 995 AGGGTCAGTAACGGTTGTG 977  
>miR2602a Score: 2.2 R03G\_17329  
Query: 1 TTCCAGTGATTGCCAGCAT 19  
|:|||||\*|||||||:|:  
Sbjct: 3833 AGGGTCAGTAACGGTTGTG 3815  
>miR2602a Score: 2.2 R03G\_17318  
Query: 1 TTCCAGTGATTGCCAGCAT 19  
|:|||||\*|||||||:|:  
Sbjct: 4496 AGGGTCAGTAACGGTTGTG 4478  
>miR2602a Score: 2.2 R03G\_17274  
Query: 1 TTCCAGTGATTGCCAGCAT 19  
|:|||||\*|||||||:|:  
Sbjct: 4319 AGGGTCAGTAACGGTTGTG 4301  
>miR396b Score: 2.5 R03G\_14017  
Query: 1 TTCCACAGCTTTCTTGA ACT 20  
||||\*|||||\*||||\*||  
Sbjct: 1794 AAGGTCTCGAAATAACT-GA 1776  
>miR396b Score: 2.5 R03G\_09454  
Query: 1 TTCCACAGCTTTCTTGA ACT 20  
||\*|||||||\*|||||\*  
Sbjct: 2287 AAAGTGTCGAAACA ACTTGC 2268

>miR396b Score: 2.5 R03G\_07651  
Query: 1 TTCCACAGCTTTCTTGAAC 20  
||\*|||||||\*||\*|  
Sbjct: 4225 AAAGTGTGCGAAAGAAATTA 4206

>miR396b Score: 2.0 R03G\_02790  
Query: 1 TTCCACAGCTTTCTTGAAC-T 20  
||||\*|||||||\*||\*|  
Sbjct: 759 AAGGTATCGAAAGAACTCGCA 739

>miR396b Score: 2.5 R03G\_03278  
Query: 1 TTCCACAGCTTTCTTGAAC 20  
||||||:||||\*|:||\*|  
Sbjct: 1794 AAGGTGTTGAAAAAGCTT-A 1776

>miR396b Score: 2.5 R03G\_03333  
Query: 1 TTCCACAGCTTTCTTGAAC 20  
||||\*||||:||||||\*\*|  
Sbjct: 912 AAGGTATCGAGAGAACT-CA 894

>miR396b Score: 2.5 R03G\_16940  
Query: 1 TTCCACAGCTTTCTTGAAC 20  
||\*||||\*|||||||\*||  
Sbjct: 69 AAGCTGTCTAAAGAACTCGA 50

>miR7711-5p.1 Score: 2.0 R03G\_15141  
Query: 1 TACTTAGCTGTTTGACTTCTTG 22  
||\*||\*|||||||  
Sbjct: 75 ATAAAACGACAAACTGAAGAAC 54

>miR7711-5p.1 Score: 1.0 R03G\_12954  
Query: 1 TACTTAGCTGTTTGACTTCTTG 22  
||||\*|||||||  
Sbjct: 75 ATGAAACGACAAACTGAAGAAC 54

>miR7711-5p.1 Score: 1.0 R03G\_10762  
Query: 1 TACTTAGCTGTTTGACTTCTTG 22  
||||\*|||||||  
Sbjct: 75 ATGAAACGACAAACTGAAGAAC 54

>miR7711-5p.1 Score: 1.0 R03G\_10770  
Query: 1 TACTTAGCTGTTTGACTTCTTG 22  
||||\*|||||||  
Sbjct: 75 ATGAAACGACAAACTGAAGAAC 54

>miR7711-5p.1 Score: 2.0 R03G\_09168  
Query: 1 TACTTAGCTGTTTGACTTCTTG 22  
||\*||\*|||||||  
Sbjct: 75 ATAAAACGACAAACTGAAGAAC 54

>miR7711-5p.1 Score: 2.0 R03G\_04690  
Query: 1 TACTTAGCTGTTTGACTTCTTG 22  
||\*||\*|||||||  
Sbjct: 75 ATAAAGCGACAAACTGAAGAAC 54

>miR7711-5p.1 Score: 2.0 R03G\_04787

Query: 1 TACTTAGCTGTTTGA CTTCTTG 22  
||\*||\*||||||||||||||  
Sbjct: 75 ATAAAACGACAAACTGAAGAAC 54  
>miR7711-5p.1 Score: 2.0 R03G\_05431

Query: 1 TACTTAGCTGTTTGA CTTCTTG 22  
||\*||\*||||||||||||||  
Sbjct: 75 ATAAAACGACAAACTGAAGAAC 54  
>miR7711-5p.1 Score: 2.0 R03G\_02822

Query: 1 TACTTAGCTGTTTGA CTTCTTG 22  
||\*||\*||||||||||||||  
Sbjct: 75 ATAAAGCGACAAACTGAAGAAC 54  
>miR7711-5p.1 Score: 1.0 R03G\_00304

Query: 1 TACTTAGCTGTTTGA CTTCTTG 22  
||||\*||||||||||||||  
Sbjct: 75 ATGAAACGACAAACTGAAGAAC 54  
>miR5373 Score: 2.5 R03G\_15307

Query: 1 TCTCTTGTATGCTGATGATGT-T 22  
|\*||||||||||\*||||\*|  
Sbjct: 1504 ACAGAACATACGACA ACTACACA 1482  
>miR5373 Score: 2.0 R03G\_14120

Query: 1 TCTCTTGTATGCTGATGATGTT 22  
|||\*|||||||:||||||\*  
Sbjct: 166 AGAAAACATACGGCTACTACAT 145  
>miR5373 Score: 2.5 R03G\_10168

Query: 1 TCTCTTGTATGCTGATGATGTT 22  
|||||||\*|:|||||\*|\*||  
Sbjct: 281 AGAGAACATTTGACTACGA-AA 261  
>miR832-3p Score: 1.8 R03G\_16359

Query: 1 TTGATCGAATCCAAGCCAAG 20  
:||||||\*|||||||\*||  
Sbjct: 502 GACTAGCCTAGGTTTCGGGTC 483  
>miR832-3p Score: 1.8 R03G\_16545

Query: 1 TTGATCGAATCCAAGCCAAG 20  
:||||||\*|||||||\*||  
Sbjct: 502 GACTAGCCTAGGTTTCGGGTC 483  
>miR832-3p Score: 1.8 R03G\_16554

Query: 1 TTGATCGAATCCAAGCCAAG 20  
:\*||||||||||||||\*||  
Sbjct: 502 GCCTAGCTTAGGTTTCGGGTC 483  
>miR832-3p Score: 1.2 R03G\_15575

Query: 1 TTGATCGAATCCAAGCCAAG 20  
::||||||||||||||\*||  
Sbjct: 325 GGCTAGCTTAGGTTTCGGGTC 306  
>miR832-3p Score: 1.2 R03G\_15001

Query: 1 TTGATCGAATCCAAGCCAAG 20

::|||||\*||  
Sbjct: 325 GGCTAGCTTAGGTTCTGGGTC 306  
>miR832-3p Score: 0.8 R03G\_15146  
Query: 1 TTGATCGAATCCAAGCCAAG 20  
:|||||\*||  
Sbjct: 382 GACTAGCTTAGGTTCTGGGTC 363  
>miR832-3p Score: 1.8 R03G\_14621  
Query: 1 TTGATCGAATCCAAGCCAAG 20  
:|||||\*|||||\*||  
Sbjct: 160 GACTAGCCTAGGTTCTGGGTC 141  
>miR832-3p Score: 1.2 R03G\_12664  
Query: 1 TTGATCGAATCCAAGCCAAG 20  
::|||||\*||  
Sbjct: 229 GGCTAGCTTAGGTTCTGGGTC 210  
>miR832-3p Score: 2.5 R03G\_12847  
Query: 1 TTGATCGAATCCAAGCCAAG 20  
|||||\*||\*||  
Sbjct: 312 AACTAGCTTAGGTTAGCTCC 293  
>miR832-3p Score: 2.2 R03G\_13266  
Query: 1 TTGATCGAATCCAAGCCAAG 20  
:|||:|\*|||||\*||  
Sbjct: 280 GACTGGCCTAGGTTCTGGGTC 261  
>miR832-3p Score: 1.8 R03G\_13271  
Query: 1 TTGATCGAATCCAAGCCAAG 20  
:|||||\*|||||\*||  
Sbjct: 502 GACTAGCCTAGGTTCTGGGTC 483  
>miR832-3p Score: 1.8 R03G\_13277  
Query: 1 TTGATCGAATCCAAGCCAAG 20  
:\*|||||\*||  
Sbjct: 502 GCCTAGCTTAGGTTCTGGGTC 483  
>miR832-3p Score: 1.2 R03G\_11240  
Query: 1 TTGATCGAATCCAAGCCAAG 20  
::|||||\*||  
Sbjct: 325 GGCTAGCTTAGGTTCTGGGTC 306  
>miR832-3p Score: 2.0 R03G\_11266  
Query: 1 TTGATCGAATCCAAGCCAAG 20  
|||:|\*|||||\*||  
Sbjct: 325 AACTGGCCTAGGTTCTGGGTC 306  
>miR832-3p Score: 1.8 R03G\_10800  
Query: 1 TTGATCGAATCCAAGCCAAG 20  
:|||||\*|||||\*||  
Sbjct: 160 GACTAGCCTAGGTTCTGGGTC 141  
>miR832-3p Score: 2.2 R03G\_10866  
Query: 1 TTGATCGAATCCAAGCCAAG 20  
:|||:|\*|||||\*||



Sbjct: 502 GACTGGCCTAGGTTCGGGTC 483  
>miR832-3p Score: 1.8 R03G\_09612  
Query: 1 TTGATCGAATCCAAGCCAAG 20  
:|||||\*|||||||\*||  
Sbjct: 502 GACTAGCCTAGGTTCGGGTC 483  
>miR832-3p Score: 1.2 R03G\_08663  
Query: 1 TTGATCGAATCCAAGCCAAG 20  
::|||||||\*||  
Sbjct: 502 GGCTAGCTTAGGTTCGGGTC 483  
>miR832-3p Score: 2.2 R03G\_06875  
Query: 1 TTGATCGAATCCAAGCCAAG 20  
|||\*||||||\*|||||:  
Sbjct: 1739 AACGAGCTTAGTTTCGGTTT 1720  
>miR832-3p Score: 1.8 R03G\_07031  
Query: 1 TTGATCGAATCCAAGCCAAG 20  
:\*|||||||\*||  
Sbjct: 502 GCCTAGCTTAGGTTCGGGTC 483  
>miR832-3p Score: 1.2 R03G\_07112  
Query: 1 TTGATCGAATCCAAGCCAAG 20  
::|||||||\*||  
Sbjct: 325 GGCTAGCTTAGGTTCGGGTC 306  
>miR832-3p Score: 1.2 R03G\_07120  
Query: 1 TTGATCGAATCCAAGCCAAG 20  
::|||||||\*||  
Sbjct: 325 GGCTAGCTTAGGTTCGGGTC 306  
>miR832-3p Score: 2.2 R03G\_07688  
Query: 1 TTGATCGAATCCAAGCCAAG 20  
:|||:|\*||||||\*||  
Sbjct: 502 GACTGGCCTAGGTTCGGGTC 483  
>miR832-3p Score: 2.5 R03G\_05301  
Query: 1 TTGATCGAATCCAAGCCAAG 20  
:|||:|:||||||\*|||:  
Sbjct: 454 GACTGGTTTAGGTTAGGTTT 435  
>miR832-3p Score: 2.5 R03G\_03727  
Query: 1 TTGATCGAATCCAAGCCAAG 20  
||||\*|||||||:\*|||  
Sbjct: 1630 AACTAAGTTAGTTTAGTTC 1611  
>miR832-3p Score: 2.2 R03G\_03803  
Query: 1 TTGATCGAATCCAAGCCAAG 20  
::|||||||\*||\*||  
Sbjct: 325 GGCTAGCTTAGGTTCAGGTC 306  
>miR832-3p Score: 1.8 R03G\_00255  
Query: 1 TTGATCGAATCCAAGCCAAG 20  
:|||||\*|||||||\*||  
Sbjct: 502 GACTAGCCTAGGTTCGGGTC 483

>miR832-3p Score: 2.0 R03G\_01902  
Query: 1 TTGATCGAATCCAAGCCA-AG 20  
||||\*:|||\*||  
Sbjct: 3944 AACTACTTTAGGTTTCGGTATC 3924

>miR172k Score: 0.0 R03G\_17256  
Query: 1 TGAAGTGGATGCTGCTGCT 19  
|||||\*|||\*|||  
Sbjct: 374 ACTTGACCTACGACGACGA 356

>miR172k Score: 0.0 R03G\_17248  
Query: 1 TGAAGTGGATGCTGCTGCT 19  
|||||\*|||\*|||  
Sbjct: 377 ACTTGACCTACGACGACGA 359

>miR172k Score: 2.2 R03G\_17215  
Query: 1 TGAAGTGGATGCTGCTGCT 19  
:||||\*:|||\*|||\*|||  
Sbjct: 203 GCTTGCTCTACGACGACAA 185

>miR172k Score: 2.2 R03G\_16897  
Query: 1 TGAAGTGGATGCTGCTGCT 19  
:||||\*:|||\*|||\*|||  
Sbjct: 203 GCTTGCTCTACGACGACAA 185

>miR172k Score: 1.0 R03G\_16748  
Query: 1 TGAAGTGGATGCTGCTGCT 19  
|||||\*|||\*|||  
Sbjct: 347 ACTTGACCCACGACGACGA 329

>miR172k Score: 2.2 R03G\_16807  
Query: 1 TGAAGTGGATGCTGCTGCT 19  
:||||\*:|||\*|||\*|||  
Sbjct: 203 GCTTGCTCTACGACGACAA 185

>miR172k Score: 1.8 R03G\_16551  
Query: 1 TGAAGTGGATGCTGCTGCT 19  
:||||\*:|||\*|||\*|||  
Sbjct: 203 GCTTGCTCTACGACGACGA 185

>miR172k Score: 1.8 R03G\_16555  
Query: 1 TGAAGTGGATGCTGCTGCT 19  
:||||\*:|||\*|||\*|||  
Sbjct: 203 GCTTGCTCTACGACGACGA 185

>miR172k Score: 0.0 R03G\_16137  
Query: 1 TGAAGTGGATGCTGCTGCT 19  
|||||\*|||\*|||  
Sbjct: 371 ACTTGACCTACGACGACGA 353

>miR172k Score: 0.0 R03G\_15890  
Query: 1 TGAAGTGGATGCTGCTGCT 19  
|||||\*|||\*|||  
Sbjct: 377 ACTTGACCTACGACGACGA 359

>miR172k Score: 1.0 R03G\_15897

Query: 1 TGAAGTGGATGCTGCTGCT 19  
|||||||\*|||||||  
Sbjct: 347 ACTTGACCCACGACGACGA 329  
>miR172k Score: 2.5 R03G\_16070  
Query: 1 TGAAGTGGATGCTGCTGCT 19  
|||||||\*:\*|||||||  
Sbjct: 522 ACTTGACCAGCCACGACGA 504  
>miR172k Score: 2.2 R03G\_15675  
Query: 1 TGAAGTGGATGCTGCTGCT 19  
:||||\*:\*|||||||\*|  
Sbjct: 203 GCTTGCTCTACGACGACAA 185  
>miR172k Score: 2.5 R03G\_15446  
Query: 1 TGAAGTGGATGCTGCTGCT 19  
\*\*|||||:|||||||\*|  
Sbjct: 819 CATTGACTTACGACGACGC 801  
>miR172k Score: 2.5 R03G\_15536  
Query: 1 TGAAGTGGATGCTGCTGCT 19  
|||\*\*|||||||\*|  
Sbjct: 660 ACTACACCTACGACGACTA 642  
>miR172k Score: 0.0 R03G\_15147  
Query: 1 TGAAGTGGATGCTGCTGCT 19  
|||||||  
Sbjct: 341 ACTTGACCTACGACGACGA 323  
>miR172k Score: 2.2 R03G\_14359  
Query: 1 TGAAGTGGATGCTGCTGCT 19  
:||||\*:\*|||||||\*|  
Sbjct: 203 GCTTGCTCTACGACGACAA 185  
>miR172k Score: 1.0 R03G\_14551  
Query: 1 TGAAGTGGATGCTGCTGCT 19  
|||||||\*|||||||  
Sbjct: 347 ACTTGACCCACGACGACGA 329  
>miR172k Score: 1.8 R03G\_13726  
Query: 1 TGAAGTGGATGCTGCTGCT 19  
:||||\*:\*|||||||  
Sbjct: 203 GCTTGCTCTACGACGACGA 185  
>miR172k Score: 1.8 R03G\_13742  
Query: 1 TGAAGTGGATGCTGCTGCT 19  
:||||\*:\*|||||||  
Sbjct: 203 GCTTGCTCTACGACGACGA 185  
>miR172k Score: 2.5 R03G\_13827  
Query: 1 TGAAGTGGATGCTGCTGCT 19  
|:|||||:|\*|||||\*|  
Sbjct: 705 ATTTGACTTAGGACGACAA 687  
>miR172k Score: 0.0 R03G\_13146  
Query: 1 TGAAGTGGATGCTGCTGCT 19

|||||  
Sbjct: 377 ACTTGACCTACGACGACGA 359  
>miR172k Score: 2.0 R03G\_13150  
Query: 1 TGAAGTGGATGCTGCTGCT 19  
\*:|||||:\*

Sbjct: 766 CTTTGACCTACGACGATAA 748  
>miR172k Score: 2.2 R03G\_13151  
Query: 1 TGAAGTGGATGCTGCTGCT 19  
:||||\*:|||||\*|

Sbjct: 203 GCTTGCTCTACGACGACAA 185  
>miR172k Score: 1.0 R03G\_11977  
Query: 1 TGAAGTGGATGCTGCTGCT 19  
|||||\*|||||

Sbjct: 311 ACTTGACCCACGACGACGA 293  
>miR172k Score: 1.0 R03G\_11236  
Query: 1 TGAAGTGGATGCTGCTGCT 19  
|||||\*|||||

Sbjct: 389 ACTTGACCCACGACGACGA 371  
>miR172k Score: 1.0 R03G\_11537  
Query: 1 TGAAGTGGATGCTGCTGCT 19  
|||||\*|||||

Sbjct: 389 ACTTGACCCACGACGACGA 371  
>miR172k Score: 1.8 R03G\_11773  
Query: 1 TGAAGTGGATGCTGCTGCT 19  
:||||\*:|||||

Sbjct: 203 GCTTGCTCTACGACGACGA 185  
>miR172k Score: 2.2 R03G\_10235  
Query: 1 TGAAGTGGATGCTGCTGCT 19  
:||||\*:|||||\*|

Sbjct: 203 GCTTGCTCTACGACGACAA 185  
>miR172k Score: 2.0 R03G\_10520  
Query: 1 TGAAGTGGATGCTGCTGCT 19  
\*:|||||:\*

Sbjct: 706 CTTTGACCTACGACGATAA 688  
>miR172k Score: 2.5 R03G\_10706  
Query: 1 TGAAGTGGATGCTGCTGCT 19  
|||\*\*|||||:||

Sbjct: 402 ACTACACCTACGACGATGA 384  
>miR172k Score: 2.2 R03G\_10732  
Query: 1 TGAAGTGGATGCTGCTGCT 19  
:||||\*:|||||\*|

Sbjct: 203 GCTTGCTCTACGACGACAA 185  
>miR172k Score: 1.5 R03G\_10775  
Query: 1 TGAAGTGGATGCTGCTGCT 19  
|||||\*|||\*|

Sbjct: 375 ACTTGACCTACGAAGACAA 357  
>miR172k Score: 1.8 R03G\_09483  
Query: 1 TGAAGTGGATGCTGCTGCT 19  
:||||\*:|||

Sbjct: 203 GCTTGCTCTACGACGACGA 185  
>miR172k Score: 0.5 R03G\_09497  
Query: 1 TGAAGTGGATGCTGCTGCT 19  
|||

Sbjct: 86 ACTTGACCTACGACGACAA 68  
>miR172k Score: 2.2 R03G\_09499  
Query: 1 TGAAGTGGATGCTGCTGCT 19  
:||||\*:|||

Sbjct: 203 GCTTGCTCTACGACGACAA 185  
>miR172k Score: 2.2 R03G\_09544  
Query: 1 TGAAGTGGATGCTGCTGCT 19  
:||||\*:|||

Sbjct: 203 GCTTGCTCTACGACGACAA 185  
>miR172k Score: 1.0 R03G\_09602  
Query: 1 TGAAGTGGATGCTGCTGCT 19  
|||

Sbjct: 347 ACTTGACCCACGACGACGA 329  
>miR172k Score: 1.0 R03G\_09603  
Query: 1 TGAAGTGGATGCTGCTGCT 19  
|||

Sbjct: 389 ACTTGACCCACGACGACGA 371  
>miR172k Score: 1.8 R03G\_09607  
Query: 1 TGAAGTGGATGCTGCTGCT 19  
:||||\*:|||

Sbjct: 203 GCTTGCTCTACGACGACGA 185  
>miR172k Score: 1.0 R03G\_09929  
Query: 1 TGAAGTGGATGCTGCTGCT 19  
|||

Sbjct: 347 ACTTGACCCACGACGACGA 329  
>miR172k Score: 0.0 R03G\_10041  
Query: 1 TGAAGTGGATGCTGCTGCT 19  
|||

Sbjct: 377 ACTTGACCTACGACGACGA 359  
>miR172k Score: 1.0 R03G\_10218  
Query: 1 TGAAGTGGATGCTGCTGCT 19  
|||

Sbjct: 368 ACTTGACCCACGACGACGA 350  
>miR172k Score: 1.0 R03G\_07981  
Query: 1 TGAAGTGGATGCTGCTGCT 19  
|||

Sbjct: 347 ACTTGACCCACGACGACGA 329

>miR172k Score: 1.8 R03G\_08846  
Query: 1 TGAAGTGGATGCTGCTGCT 19  
:||||\*:|||||||  
Sbjct: 203 GCTTGCTCTACGACGACGA 185

>miR172k Score: 0.0 R03G\_09182  
Query: 1 TGAAGTGGATGCTGCTGCT 19  
|||||||  
Sbjct: 353 ACTTGACCTACGACGACGA 335

>miR172k Score: 1.0 R03G\_06730  
Query: 1 TGAAGTGGATGCTGCTGCT 19  
|||||||\*|||||||  
Sbjct: 347 ACTTGACCCACGACGACGA 329

>miR172k Score: 2.5 R03G\_07051  
Query: 1 TGAAGTGGATGCTGCTGC-T 19  
|:|\*|||||||\*|  
Sbjct: 1250 ATTAGACCTACGACGACCTA 1231

>miR172k Score: 2.2 R03G\_07303  
Query: 1 TGAAGTGGATGCTGCTGCT 19  
:||||\*:|||||||\*|  
Sbjct: 203 GCTTGCTCTACGACGACAA 185

>miR172k Score: 1.0 R03G\_07306  
Query: 1 TGAAGTGGATGCTGCTGCT 19  
|||||||\*|||||||  
Sbjct: 347 ACTTGACCCACGACGACGA 329

>miR172k Score: 1.0 R03G\_07696  
Query: 1 TGAAGTGGATGCTGCTGCT 19  
|||||||\*|||||||  
Sbjct: 347 ACTTGACCCACGACGACGA 329

>miR172k Score: 1.8 R03G\_07704  
Query: 1 TGAAGTGGATGCTGCTGCT 19  
:||||\*:|||||||  
Sbjct: 203 GCTTGCTCTACGACGACGA 185

>miR172k Score: 1.0 R03G\_07720  
Query: 1 TGAAGTGGATGCTGCTGCT 19  
|||||||\*|||||||  
Sbjct: 347 ACTTGACCCACGACGACGA 329

>miR172k Score: 1.0 R03G\_07738  
Query: 1 TGAAGTGGATGCTGCTGCT 19  
|||||||\*|||||||  
Sbjct: 398 ACTTGACCCACGACGACGA 380

>miR172k Score: 2.2 R03G\_07875  
Query: 1 TGAAGTGGATGCTGCTGCT 19  
:||||\*:|||||||\*|  
Sbjct: 203 GCTTGCTCTACGACGACAA 185

>miR172k Score: 2.0 R03G\_05635

Query: 1 TGAAGTGGATGCTGCTGCT 19  
\*||||\*:|||||||  
Sbjct: 203 CCTTGCTCTACGACGACGA 185  
>miR172k Score: 2.5 R03G\_06335  
Query: 1 TGAAGTGGATGCTGCTGCT 19  
\*|||||:|\*|||||||\*|  
Sbjct: 695 CCTTGATCAACGACGAC-A 678  
>miR172k Score: 2.2 R03G\_06441  
Query: 1 TGAAGTGGATGCTGCTGCT 19  
:||||\*:|||||||\*|  
Sbjct: 203 GCTTGCTCTACGACGACAA 185  
>miR172k Score: 2.0 R03G\_06678  
Query: 1 TGAAGTGGATGCTGCTGCT 19  
||\*|||||||:||||||\*|  
Sbjct: 1136 ACATGACCTATGACGAC-A 1119  
>miR172k Score: 2.0 R03G\_04559  
Query: 1 TGAAGTGGATGCTGCTGCT 19  
||||||:|||||||\*|  
Sbjct: 387 ACTTGATCTACGACGA-AA 370  
>miR172k Score: 1.0 R03G\_04679  
Query: 1 TGAAGTGGATGCTGCTGCT 19  
|||||||\*|||||||  
Sbjct: 317 ACTTGACCCACGACGACGA 299  
>miR172k Score: 2.5 R03G\_04867  
Query: 1 TGAAGTGGATGCTGCTGCT 19  
||||\*|||||\*||||\*|  
Sbjct: 565 ACTTCACCTACTACGACAA 547  
>miR172k Score: 2.2 R03G\_05336  
Query: 1 TGAAGTGGATGCTGCTGCT 19  
:||||\*:|||||||\*|  
Sbjct: 203 GCTTGCTCTACGACGACAA 185  
>miR172k Score: 1.0 R03G\_05425  
Query: 1 TGAAGTGGATGCTGCTGCT 19  
|||||||\*|||||||  
Sbjct: 374 ACTTGACCTACGAAGACGA 356  
>miR172k Score: 1.0 R03G\_02228  
Query: 1 TGAAGTGGATGCTGCTGCT 19  
|||||||\*|||||||  
Sbjct: 347 ACTTGACCCACGACGACGA 329  
>miR172k Score: 2.0 R03G\_02685  
Query: 1 TGAAGTGGATGCTGCTGCT 19  
\*:|||||||\*|  
Sbjct: 766 CTTTGACCTACGACGATAA 748  
>miR172k Score: 2.2 R03G\_02689  
Query: 1 TGAAGTGGATGCTGCTGCT 19

:||||\*:|||||||\*|  
Sbjct: 203 GCTTGCTCTACGACGACAA 185  
>miR172k Score: 2.5 R03G\_03439  
Query: 1 TGAAGTGGATGCTGCTGCT 19  
|||||||\*|:||||\*||  
Sbjct: 537 ACTTGACCCATGACGAAGA 519  
>miR172k Score: 0.0 R03G\_03584  
Query: 1 TGAAGTGGATGCTGCTGCT 19  
|||||||  
Sbjct: 305 ACTTGACCTACGACGACGA 287  
>miR172k Score: 1.8 R03G\_03615  
Query: 1 TGAAGTGGATGCTGCTGCT 19  
:||||\*:|||||||  
Sbjct: 203 GCTTGCTCTACGACGACGA 185  
>miR172k Score: 1.0 R03G\_04211  
Query: 1 TGAAGTGGATGCTGCTGCT 19  
|||||||\*|||||||  
Sbjct: 347 ACTTGACCCACGACGACGA 329  
>miR172k Score: 0.0 R03G\_00288  
Query: 1 TGAAGTGGATGCTGCTGCT 19  
|||||||  
Sbjct: 368 ACTTGACCTACGACGACGA 350  
>miR172k Score: 2.2 R03G\_00681  
Query: 1 TGAAGTGGATGCTGCTGCT 19  
:||||\*:|||||||\*|  
Sbjct: 203 GCTTGCTCTACGACGACAA 185  
>miR172k Score: 2.5 R03G\_01016  
Query: 1 TGAAGTGGATGCTGCTGCT 19  
|:|||:||||||\*||\*|  
Sbjct: 33 ATTTGGCCTACGAGGACAA 15  
>miR172k Score: 2.2 R03G\_01322  
Query: 1 TGAAGTGGATGCTGCTGCT 19  
:||||\*:|||||||\*|  
Sbjct: 203 GCTTGCTCTACGACGACAA 185  
>miR172k Score: 2.0 R03G\_01369  
Query: 1 TGAAGTGGATGCTGCTGCT 19  
\*|\*||||:|||||||  
Sbjct: 344 TCCTGACTTACGACGACGA 326  
>miR172k Score: 1.8 R03G\_01612  
Query: 1 TGAAGTGGATGCTGCTGCT 19  
:||||\*:|||||||  
Sbjct: 203 GCTTGCTCTACGACGACGA 185  
>miR172k Score: 1.0 R03G\_01726  
Query: 1 TGAAGTGGATGCTGCTGCT 19  
|||||||\*|||||||



Sbjct: 392 ACTTGACCCACGACGACGA 374  
>miR172k Score: 2.0 R03G\_01737  
Query: 1 TGAAGTGGATGCTGCTGCT 19  
\*:|||||:|\*|  
Sbjct: 559 CTTTGACCTACGACGATAA 541  
>miR172k Score: 2.5 R03G\_01912  
Query: 1 TGAAGTGGATGCTGCTGCT 19  
|||||:|:|\*|  
Sbjct: 33 ACTTGATCTGTGTCGACGA 15  
>miR172k Score: 2.2 R03G\_01956  
Query: 1 TGAAGTGGATGCTGCTGCT 19  
:||||\*|:|||||\*|  
Sbjct: 203 GCTTGCTCTACGACGACAA 185  
>miR172k Score: 2.0 R03G\_17440  
Query: 1 TGAAGTGGATGCTGCTGCT 19  
\*:|||||:|\*|  
Sbjct: 1045 CTTTGACCTACGACGATAA 1027  
>miR172k Score: 2.2 R03G\_17400  
Query: 1 TGAAGTGGATGCTGCTGCT 19  
:||||\*|:|||||\*|  
Sbjct: 77 GCTTGCTCTACGACGACAA 59  
>miR172k Score: 2.2 R03G\_17382  
Query: 1 TGAAGTGGATGCTGCTGCT 19  
:||||\*|:|||||\*|  
Sbjct: 203 GCTTGCTCTACGACGACAA 185  
>miR172k Score: 0.0 R03G\_17350  
Query: 1 TGAAGTGGATGCTGCTGCT 19  
|||||  
Sbjct: 371 ACTTGACCTACGACGACGA 353  
>miR172k Score: 2.2 R03G\_17285  
Query: 1 TGAAGTGGATGCTGCTGCT 19  
:||||\*|:|||||\*|  
Sbjct: 203 GCTTGCTCTACGACGACAA 185  
>miR7837 Score: 0.0 R03G\_11243  
Query: 1 TGGGTGTAGGAGTGGTAGCTG 21  
|||||  
Sbjct: 178 ACCCACATCCTCACCATCGAC 158  
>miR7837 Score: 2.5 R03G\_08703  
Query: 1 TGGGTGTAGGAGTGGTAGCTG 21  
|||||:|\*|:||||\*||  
Sbjct: 34 ACCCACATCTTCTTCATCCAC 14  
>miR7837 Score: 2.5 R03G\_06473  
Query: 1 TGGGTGTAGGAGTGGTAGCTG 21  
\*|||||:|:|\*|||  
Sbjct: 148 TCCCACATCTTCATCGT-GAC 129

>miR7837 Score: 2.5 R03G\_05294  
Query: 1 TGGGTGTAGGAGTGGTAGCTG 21  
::||:||||:|||||||:  
Sbjct: 247 GTCCGCATTTTCACCATCGAT 227

>miR7837 Score: 2.0 R03G\_00539  
Query: 1 TGGGTGTAGGAGTGGTAGCTG 21  
|||||\*|||||||\*|||||  
Sbjct: 319 ACCCACTTCCTCACCTCGAC 299

>miR7837 Score: 2.0 R03G\_01660  
Query: 1 TGGGTGTAGGAGTGGTAGCTG 21  
::||||:|||||||\*|:  
Sbjct: 853 GTCCACGTCCTCACCATC-AT 834

>miR7837 Score: 2.5 R03G\_02068  
Query: 1 TGGGTGTAGGAGTGGTAGCTG 21  
|||||||\*|||\*|||  
Sbjct: 226 ACCCACATCCTTCCCAT-AAC 207

>miR8016 Score: 1.5 R03G\_16368  
Query: 1 TTTTGAATGAAGGGCCTGTGG 22  
|||:|||||||\*|||||  
Sbjct: 1927 AAAGACTTACTTCCCGAACACC 1906

>miR8016 Score: 1.5 R03G\_15886  
Query: 1 TTTTGAATGAAGGGCCTGTGG 22  
|||:|||||||\*|||||  
Sbjct: 1762 AAAGACTTACTTCCCGAACACC 1741

>miR8016 Score: 2.0 R03G\_15258  
Query: 1 TTTTGAATGAAGGGCCTGTGG 22  
|||||||\*|||||\*|||||  
Sbjct: 613 AAAA ACTTCTTCCCGAACACC 592

>miR8016 Score: 1.5 R03G\_14552  
Query: 1 TTTTGAATGAAGGGCCTGTGG 22  
|||:|||||||\*|||||  
Sbjct: 1927 AAAGACTTACTTCCCGAACACC 1906

>miR8016 Score: 1.0 R03G\_13451  
Query: 1 TTTTGAATGAAGGGCCTGTGG 22  
|||||||\*|||||\*|||||  
Sbjct: 1762 AAAA ACTTCTTCCCGAACACC 1741

>miR8016 Score: 1.5 R03G\_13708  
Query: 1 TTTTGAATGAAGGGCCTGTGG 22  
|||:|||||||\*|||||  
Sbjct: 1762 AAAGACTTACTTCCCGAACACC 1741

>miR8016 Score: 2.0 R03G\_12968  
Query: 1 TTTTGAATGAAGGGCCTGTGG 22  
|||||||\*|||||\*|||||  
Sbjct: 1843 AAAA ACTTCTTCCCGAACACC 1822

>miR8016 Score: 1.5 R03G\_12646

Query: 1 TTTTGAATGAAGGCCTGTGG 22  
|||:|||||||\*|||||  
Sbjct: 1762 AAAGACTTACTTCCCGAACACC 1741  
>miR8016 Score: 1.5 R03G\_11542  
Query: 1 TTTTGAATGAAGGCCTGTGG 22  
|||:|||||||\*|||||  
Sbjct: 1762 AAAGACTTACTTCCCGAACACC 1741  
>miR8016 Score: 1.5 R03G\_05908  
Query: 1 TTTTGAATGAAGGCCTGTGG 22  
|||:|||||||\*|||||  
Sbjct: 1762 AAAGACTTACTTCCCGAACACC 1741  
>miR8016 Score: 2.0 R03G\_05911  
Query: 1 TTTTGAATGAAGGCCTGTGG 22  
|||||||\*||||||\*|||||  
Sbjct: 1696 AAAA ACTTCTTCCCGAACACC 1675  
>miR8016 Score: 2.0 R03G\_05954  
Query: 1 TTTTGAATGAAGGCCTGTGG 22  
|||||||\*||||||\*|||||  
Sbjct: 1843 AAAA ACTTCTTCCCGAACACC 1822  
>miR8016 Score: 1.5 R03G\_05342  
Query: 1 TTTTGAATGAAGGCCTGTGG 22  
|||:|||||||\*|||||  
Sbjct: 1927 AAAGACTTACTTCCCGAACACC 1906  
>miR8016 Score: 2.0 R03G\_05427  
Query: 1 TTTTGAATGAAGGCCTGTGG 22  
|||||||\*||||||\*|||||  
Sbjct: 1123 AAAA ACTTCTTCCCGAACACC 1102  
>miR8016 Score: 1.8 R03G\_02818  
Query: 1 TTTTGAATGAAGGCCTGTGG 22  
|||:|||||||\*||:|  
Sbjct: 262 AAAGACTTACTTCCCGAACGCC 241  
>miR8016 Score: 2.5 R03G\_02910  
Query: 1 TTTTGAATGAAGGCCTGTGG 22  
|||||||:|:|:|\*||\*  
Sbjct: 158 AAAA ACTTATTTTCTGGA-ACA 138  
>miR8016 Score: 2.5 R03G\_00696  
Query: 1 TTTTGAATGAAGGCCTGTGG 22  
||:||\*||:|:|:|||||||  
Sbjct: 621 AAGAACATATTTTCCGGACACC 600  
>miR8016 Score: 1.0 R03G\_01193  
Query: 1 TTTTGAATGAAGGCCTGTGG 22  
|||||||\*|||||  
Sbjct: 1516 AAAA ACTTACTTCCCGAACACC 1495  
>miR8016 Score: 1.5 R03G\_01324  
Query: 1 TTTTGAATGAAGGCCTGTGG 22

|||:|||||||\*|||||  
Sbjct: 613 AAAGACTTACTTCCCGAACACC 592  
>miR1515 Score: 0.2 R03G\_16894  
Query: 1 TATTTTAGCATGACAATGATCC 22  
|||||||:||  
Sbjct: 36 ATAAAATCGTACTGTTACTGGG 15  
>miR1515 Score: 2.5 R03G\_16705  
Query: 1 TATTTTAGCATGACAATGATCC 22  
|\*|||:||||\*|||||||  
Sbjct: 69 ACAAAGTCGTCCTGTTACTAGG 48  
>miR1515 Score: 2.5 R03G\_16375  
Query: 1 TATTTTAGCATGACAATGATCC 22  
|\*|||:||||\*|||||||  
Sbjct: 69 ACAAAGTCGTCCTGTTACTAGG 48  
>miR1515 Score: 2.5 R03G\_16552  
Query: 1 TATTTTAGCATGACAATGATCC 22  
|\*|||:||||\*|||||||  
Sbjct: 69 ACAAAGTCGTCCTGTTACTAGG 48  
>miR1515 Score: 2.5 R03G\_15668  
Query: 1 TATTTTAGCATGACAATGATCC 22  
|\*|||:||||\*|||||||  
Sbjct: 78 ACAAAGTCGTCCTGTTACTAGG 57  
>miR1515 Score: 2.5 R03G\_14803  
Query: 1 TATTTTAGCATGACAATGATCC 22  
|\*|||:||||\*|||||||  
Sbjct: 69 ACAAAGTCGTCCTGTTACTAGG 48  
>miR1515 Score: 2.5 R03G\_15135  
Query: 1 TATTTTAGCATGACAATGATCC 22  
|\*|||:||||\*|||||||  
Sbjct: 4260 ACAAAGTCGTCCTGTTACTAGG 4239  
>miR1515 Score: 2.5 R03G\_14638  
Query: 1 TATTTTAGCATGACAATGATCC 22  
|\*|||:||||\*|||||||  
Sbjct: 69 ACAAAGTCGTCCTGTTACTAGG 48  
>miR1515 Score: 1.8 R03G\_13731  
Query: 1 TATTTTAGCATGACAATGATCC 22  
\*\*|||||||:||  
Sbjct: 224 TGAAAATCGTACTGTTACTGGG 203  
>miR1515 Score: 2.5 R03G\_12191  
Query: 1 TATTTTAGCATGACAATGATCC 22  
|\*|||:||||\*|||||||  
Sbjct: 69 ACAAAGTCGTCCTGTTACTAGG 48  
>miR1515 Score: 2.5 R03G\_12648  
Query: 1 TATTTTAGCATGACAATGATCC 22  
|\*|||:||||\*|||||||

Sbjct: 69 ACAAAGTCGTCCTGTTACTAGG 48  
>miR1515 Score: 2.5 R03G\_11260  
Query: 1 TATTTTAGCATGACAATGATCC 22  
|\*|||:||||\*|||||||

Sbjct: 69 ACAAAGTCGTCCTGTTACTAGG 48  
>miR1515 Score: 2.5 R03G\_11408  
Query: 1 TATTTTAGCATGACAATGATCC 22  
|\*|||:||||\*|||||||

Sbjct: 69 ACAAAGTCGTCCTGTTACTAGG 48  
>miR1515 Score: 1.2 R03G\_10527  
Query: 1 TATTTTAGCATGACAATGATCC 22  
|\*|||||||:|

Sbjct: 210 ACAAATCGTACTGTTACTGGG 189  
>miR1515 Score: 2.5 R03G\_10534  
Query: 1 TATTTTAGCATGACAATGATCC 22  
|\*|||:||||\*|||||||

Sbjct: 69 ACAAAGTCGTCCTGTTACTAGG 48  
>miR1515 Score: 2.5 R03G\_10536  
Query: 1 TATTTTAGCATGACAATGATCC 22  
|\*|||:||||\*|||||||

Sbjct: 69 ACAAAGTCGTCCTGTTACTAGG 48  
>miR1515 Score: 1.8 R03G\_10553  
Query: 1 TATTTTAGCATGACAATGATCC 22  
\*\*|||||||:|

Sbjct: 210 TAAAAATCGTACTGTTACTGGG 189  
>miR1515 Score: 2.5 R03G\_10554  
Query: 1 TATTTTAGCATGACAATGATCC 22  
|\*|||:||||\*|||||||

Sbjct: 69 ACAAAGTCGTCCTGTTACTAGG 48  
>miR1515 Score: 1.8 R03G\_10559  
Query: 1 TATTTTAGCATGACAATGATCC 22  
\*\*|||||||:|

Sbjct: 210 TAAAAATCGTACTGTTACTGGG 189  
>miR1515 Score: 2.5 R03G\_10872  
Query: 1 TATTTTAGCATGACAATGATCC 22  
|\*|||:||||\*|||||||

Sbjct: 69 ACAAAGTCGTCCTGTTACTAGG 48  
>miR1515 Score: 1.2 R03G\_09962  
Query: 1 TATTTTAGCATGACAATGATCC 22  
|\*|||||||:|

Sbjct: 36 ACAAATCGTACTGTTACTGGG 15  
>miR1515 Score: 1.2 R03G\_09968  
Query: 1 TATTTTAGCATGACAATGATCC 22  
|\*|||||||:|

Sbjct: 36 ACAAATCGTACTGTTACTGGG 15

>miR1515 Score: 2.5 R03G\_07986  
Query: 1 TATTTTAGCATGACAATGATCC 22  
|\*|||:||||\*|||||||||||  
Sbjct: 69 ACAAAGTCGTCCTGTTACTAGG 48

>miR1515 Score: 2.5 R03G\_07987  
Query: 1 TATTTTAGCATGACAATGATCC 22  
|\*|||:||||\*|||||||||||  
Sbjct: 69 ACAAAGTCGTCCTGTTACTAGG 48

>miR1515 Score: 2.5 R03G\_07724  
Query: 1 TATTTTAGCATGACAATGATCC 22  
|\*|||:||||\*|||||||||||  
Sbjct: 69 ACAAAGTCGTCCTGTTACTAGG 48

>miR1515 Score: 2.5 R03G\_07731  
Query: 1 TATTTTAGCATGACAATGATCC 22  
|\*|||:||||\*|||||||||||  
Sbjct: 69 ACAAAGTCGTCCTGTTACTAGG 48

>miR1515 Score: 2.5 R03G\_05917  
Query: 1 TATTTTAGCATGACAATGATCC 22  
|\*|||:||||\*|||||||||||  
Sbjct: 69 ACAAAGTCGTCCTGTTACTAGG 48

>miR1515 Score: 2.5 R03G\_05931  
Query: 1 TATTTTAGCATGACAATGATCC 22  
|\*|||:||||\*|||||||||||  
Sbjct: 69 ACAAAGTCGTCCTGTTACTAGG 48

>miR1515 Score: 2.5 R03G\_05948  
Query: 1 TATTTTAGCATGACAATGATCC 22  
|\*|||:||||\*|||||||||||  
Sbjct: 69 ACAAAGTCGTCCTGTTACTAGG 48

>miR1515 Score: 2.5 R03G\_06419  
Query: 1 TATTTTAGCATGACAATGATCC 22  
|\*|||:||||\*|||||||||||  
Sbjct: 69 ACAAAGTCGTCCTGTTACTAGG 48

>miR1515 Score: 2.5 R03G\_03592  
Query: 1 TATTTTAGCATGACAATGATCC 22  
|\*|||:||||\*|||||||||||  
Sbjct: 69 ACAAAGTCGTCCTGTTACTAGG 48

>miR1515 Score: 2.5 R03G\_03596  
Query: 1 TATTTTAGCATGACAATGATCC 22  
|\*|||:||||\*|||||||||||  
Sbjct: 69 ACAAAGTCGTCCTGTTACTAGG 48

>miR1515 Score: 2.5 R03G\_03788  
Query: 1 TATTTTAGCATGACAATGATCC 22  
|\*|||:||||\*|||||||||||  
Sbjct: 69 ACAAAGTCGTCCTGTTACTAGG 48

>miR1515 Score: 2.5 R03G\_04026

Query: 1 TATTTTAGCATGACAATGATCC 22  
|\*|||:||||\*|||||||  
Sbjct: 69 ACAAAGTCGTCCTGTTACTAGG 48  
>miR1515 Score: 2.5 R03G\_04199  
Query: 1 TATTTTAGCATGACAATGATCC 22  
|\*|||:||||\*|||||||  
Sbjct: 69 ACAAAGTCGTCCTGTTACTAGG 48  
>miR1515 Score: 2.5 R03G\_00246  
Query: 1 TATTTTAGCATGACAATGATCC 22  
|\*|||:||||\*|||||||  
Sbjct: 69 ACAAAGTCGTCCTGTTACTAGG 48  
>miR1515 Score: 2.5 R03G\_00685  
Query: 1 TATTTTAGCATGACAATGATCC 22  
|\*|||:||||\*|||||||  
Sbjct: 69 ACAAAGTCGTCCTGTTACTAGG 48  
>miR1515 Score: 2.5 R03G\_01200  
Query: 1 TATTTTAGCATGACAATGATCC 22  
|\*|||:||||\*|||||||  
Sbjct: 69 ACAAAGTCGTCCTGTTACTAGG 48  
>miR1515 Score: 2.5 R03G\_01316  
Query: 1 TATTTTAGCATGACAATGATCC 22  
|\*|||:||||\*|||||||  
Sbjct: 69 ACAAAGTCGTCCTGTTACTAGG 48  
>miR1515 Score: 2.5 R03G\_01736  
Query: 1 TATTTTAGCATGACAATGATCC 22  
|\*|||:||||\*|||||||  
Sbjct: 69 ACAAAGTCGTCCTGTTACTAGG 48  
>miR1515 Score: 2.5 R03G\_01957  
Query: 1 TATTTTAGCATGACAATGATCC 22  
|\*|||:||||\*|||||||  
Sbjct: 69 ACAAAGTCGTCCTGTTACTAGG 48  
>miR1515 Score: 2.5 R03G\_17368  
Query: 1 TATTTTAGCATGACAATGATCC 22  
|\*|||:||||\*|||||||  
Sbjct: 69 ACAAAGTCGTCCTGTTACTAGG 48  
>miR1515 Score: 0.2 R03G\_17349  
Query: 1 TATTTTAGCATGACAATGATCC 22  
|||||||:|  
Sbjct: 36 ATAAAATCGTACTGTTACTGGG 15  
>miR5561-5p Score: 2.5 R03G\_12299  
Query: 1 CATTTGGTGAGAGACATG-GACAA 23  
\*|||||:|:|||||||\*|\*|||  
Sbjct: 1374 TTAAACTATTCTCTGTACACAGTT 1351  
>miR7502b Score: 2.5 R03G\_16530  
Query: 1 TTGTTAATAAGTTCATGC-AT 20

||:|||||||:|||||\*|\*||  
Sbjct: 1031 AATAATTATTTAAGTAAGTTA 1011  
>miR7502b Score: 2.5 R03G\_14312  
Query: 1 TTGTTAATAAGTTCATGCAT 20  
\*|:|\*|||||||||||||\*||  
Sbjct: 962 CATATTTATTCAAGTACTTA 943  
>miR7502b Score: 2.0 R03G\_12923  
Query: 1 TTGTTAATAAGTTCATGCAT 20  
|::|||||||:|||||||\*  
Sbjct: 602 AGTAATTATTTAAGTACGTT 583  
>miR7502b Score: 2.5 R03G\_13261  
Query: 1 TTGTTAATAAGTTCATGC-AT 20  
|||:|||||||:|||||:\*|\*||  
Sbjct: 1246 AACGATTATTTAAGTATATTA 1226  
>miR7502b Score: 2.2 R03G\_12569  
Query: 1 TTGTTAATAAGTTCATGCAT 20  
:||:|\*|:|||||||||||||  
Sbjct: 281 GACGATAGTTCAAGTACGTA 262  
>miR7502b Score: 2.5 R03G\_08198  
Query: 1 TTGTTAATAAGTTCATGCAT 20  
|||::|||||||||\*||\*|  
Sbjct: 190 AACGGTTATTCAAGAACG-A 172  
>miR7502b Score: 2.5 R03G\_08587  
Query: 1 TTGTTAATAAGTTCATGCAT 20  
\*|||:|||||||||\*||\*||  
Sbjct: 2039 TACAGTTATTCAAGAAC-TA 2021  
>miR7502b Score: 2.5 R03G\_05880  
Query: 1 TTGTTAATAAGTTCATGCAT 20  
||||:|||||||||\*||\*|||  
Sbjct: 290 AACAGTTATTCAAATA-GTA 272  
>miR7502b Score: 2.5 R03G\_03431  
Query: 1 TTGTTAATAAGTTCATGCA-T 20  
||:|:|||||||||||||:\*|\*|  
Sbjct: 3368 AATAGTTATTCAAGTATTTCA 3348  
>miR7502b Score: 2.2 R03G\_01163  
Query: 1 TTGTTAATAAGTTCATGCAT 20  
:|||:||:|||:|||||\*||  
Sbjct: 335 GACAGTTGTTTCGAGTACTTA 316  
>miR6451 Score: 2.0 R03G\_16725  
Query: 1 ATGTAGATCATGTTGATT 18  
|||||:|||||||:|:|\*  
Sbjct: 530 TACATTTAGTACGATTAT 513  
>miR6451 Score: 2.5 R03G\_16741  
Query: 1 ATGTAGATCATGTTGATT 18  
\*|||||\*|\*||||||||||





>miR6451 Score: 2.5 R03G\_13451  
Query: 1 ATGTAGATCATGTTGATT 18  
\*|||||\*|\*|||||||  
Sbjct: 1496 AACATCAACTACAACAA 1479

>miR6451 Score: 2.5 R03G\_13503  
Query: 1 ATGTAGATCATGTTGATT 18  
|||:|\*|||\*|||||||  
Sbjct: 1125 TACGTCAAGTTCAACTAA 1108

>miR6451 Score: 2.5 R03G\_13708  
Query: 1 ATGTAGATCATGTTGATT 18  
\*|||||\*|\*|||||||  
Sbjct: 1496 AACATCAACTACAACAA 1479

>miR6451 Score: 2.5 R03G\_12077  
Query: 1 ATGTAGATCATGTTGATT 18  
\*|||||\*|\*|||||||  
Sbjct: 1733 AACATCAACTACAACAA 1716

>miR6451 Score: 2.5 R03G\_12646  
Query: 1 ATGTAGATCATGTTGATT 18  
\*|||||\*|\*|||||||  
Sbjct: 1496 AACATCAACTACAACAA 1479

>miR6451 Score: 2.5 R03G\_11542  
Query: 1 ATGTAGATCATGTTGATT 18  
\*|||||\*|\*|||||||  
Sbjct: 1496 AACATCAACTACAACAA 1479

>miR6451 Score: 2.5 R03G\_11799  
Query: 1 ATGTAGATCATGTTGATT 18  
||||\*|||||\*|||||\*  
Sbjct: 152 TACAAGTGTCAACTAT 135

>miR6451 Score: 2.2 R03G\_10429  
Query: 1 ATGTAGATCATGTTGATT 18  
||||\*||:|||:|||||:  
Sbjct: 672 TACAGCTGGTATAACTAG 655

>miR6451 Score: 2.0 R03G\_10667  
Query: 1 ATGTAGATCATGTTGATT 18  
\*|||||||\*|\*  
Sbjct: 131 AACATCTAGTACAACAAT 114

>miR6451 Score: 2.0 R03G\_10669  
Query: 1 ATGTAGATCATGTTGATT 18  
\*|||||||\*|\*  
Sbjct: 1004 AACATCTAGTACAACAAT 987

>miR6451 Score: 2.0 R03G\_10673  
Query: 1 ATGTAGATCATGTTGATT 18  
\*|||||||\*|\*  
Sbjct: 1004 AACATCTAGTACAACAAT 987

>miR6451 Score: 2.0 R03G\_10684

Query: 1 ATGTAGATCATGTTGATT 18  
\*|||||\*  
Sbjct: 1004 AACATCTAGTACAACAAT 987  
>miR6451 Score: 2.2 R03G\_09462  
Query: 1 ATGTAGATCATGTTGATT 18  
|||:|||||:|:|:  
Sbjct: 842 TACGTCTAGTACGGCTGG 825  
>miR6451 Score: 2.5 R03G\_09689  
Query: 1 ATGTAGATCATGTTGATT 18  
\*||\*|||\*|||||  
Sbjct: 297 AACTTCTATTACAACATA 280  
>miR6451 Score: 2.2 R03G\_08163  
Query: 1 ATGTAGATCATGTTGATT 18  
||||||\*|||||\*|:  
Sbjct: 126 TACATCTATTACAACAAG 109  
>miR6451 Score: 2.5 R03G\_08513  
Query: 1 ATGTAGATCATGTTGATT 18  
||||\*||||\*|||||\*  
Sbjct: 152 TACAACACTAGTTCAACTAT 135  
>miR6451 Score: 2.5 R03G\_08772  
Query: 1 ATGTAGATCATGTTGATT 18  
\*|||||:|||\*|||||\*  
Sbjct: 3105 AACATCTGGTAAAACACTAC 3088  
>miR6451 Score: 2.5 R03G\_06746  
Query: 1 ATGTAGATCATGTTGATT 18  
|\*|||\*|||||:|||||  
Sbjct: 546 TCCATGTAGTATAACTAA 529  
>miR6451 Score: 2.0 R03G\_06872  
Query: 1 ATGTAGATCATGTTGATT 18  
\*|||||\*||:||||  
Sbjct: 918 AACATCTAGTCCAGCTAA 901  
>miR6451 Score: 2.5 R03G\_05908  
Query: 1 ATGTAGATCATGTTGATT 18  
\*||||\*||\*|||||  
Sbjct: 1496 AACATCAACTACAACATA 1479  
>miR6451 Score: 2.5 R03G\_06664  
Query: 1 ATGTAGATCATGTTGATT 18  
||||\*||||:|||||  
Sbjct: 677 TACACCTAGTGGAACATA 660  
>miR6451 Score: 2.5 R03G\_04899  
Query: 1 ATGTAGATCATGTTGATT 18  
\*::||||:|||||\*  
Sbjct: 1319 AGTATCTGGTACAACATA 1302  
>miR6451 Score: 2.5 R03G\_04929  
Query: 1 ATGTAGATCATGTTGATT 18



Sbjct: 1097 TACATCTAGTACTGTTAT 1080  
>miR6451 Score: 2.5 R03G\_01178  
Query: 1 ATGTAGATCATGTTGATT 18  
\*|||||||:::||||\*  
Sbjct: 92 AACATCTAGTGTGACTAT 75  
>miR6451 Score: 2.5 R03G\_01324  
Query: 1 ATGTAGATCATGTTGATT 18  
\*||||\*|\*|||||||  
Sbjct: 347 AACATCAACTACAATAA 330  
>miR6451 Score: 2.5 R03G\_01716  
Query: 1 ATGTAGATCATGTTGATT 18  
\*||||\*|\*|||||||  
Sbjct: 1496 AACATCAACTACAATAA 1479  
>miR6451 Score: 2.5 R03G\_01915  
Query: 1 ATGTAGATCATGTTGATT 18  
|\*||:|\*|||||||  
Sbjct: 468 TAAATTTACTACAATAA 451  
>miR6451 Score: 2.2 R03G\_02047  
Query: 1 ATGTAGATCATGTTGATT 18  
|:|||||\*|:|||||:  
Sbjct: 81 TGCATCTAATGCAACTAG 64  
>miR951 Score: 0.0 R03G\_13220  
Query: 1 TGCTCTTGACGATCTGGCTACG 22  
|||||||  
Sbjct: 217 ACGAGAACTGCTAGACCGATGC 196  
>miR951 Score: 0.5 R03G\_13223  
Query: 1 TGCTCTTGACGATCTGGCTACG 22  
|||||||:|||||  
Sbjct: 217 ACGAGAACTGCTAGACTGATGC 196  
>miR951 Score: 2.5 R03G\_12464  
Query: 1 TGCTCTTGACGATCTGGCTACG 22  
|\*||||||\*|||||:|||||  
Sbjct: 217 ACAAGAACTGGTAGACTGATGC 196  
>miR951 Score: 1.0 R03G\_04119  
Query: 1 TGCTCTTGACGATCTGGCTACG 22  
|||||||\*|||||||  
Sbjct: 217 ACGAGAACTGGTAGACCGATGC 196  
>miR951 Score: 0.0 R03G\_04122  
Query: 1 TGCTCTTGACGATCTGGCTACG 22  
|||||||  
Sbjct: 217 ACGAGAACTGCTAGACCGATGC 196  
>miR951 Score: 0.0 R03G\_04124  
Query: 1 TGCTCTTGACGATCTGGCTACG 22  
|||||||  
Sbjct: 217 ACGAGAACTGCTAGACCGATGC 196

>miR7716-3p Score: 2.2 R03G\_12741  
Query: 1 TTCTTCATCCTCCAGTAATGCC 22  
:|||||||:|\*:\*|  
Sbjct: 1191 GAGAAGTAGGAGGTCGTGGTAG 1170

>miR7716-3p Score: 2.2 R03G\_07958  
Query: 1 TTCTTCATCCTCCAGTAATGCC 22  
|||||||:|\*:\*|  
Sbjct: 3090 AAGAAGTAGGAGGTTGT-GCAG 3070

>miR7716-3p Score: 0.0 R03G\_17338  
Query: 1 TTCTTCATCCTCCAGTAATGCC 22  
|||||||  
Sbjct: 24 AAGAAGTAGGAGGTCATTACGG 3

>miR8741 Score: 0.0 R03G\_17257  
Query: 1 TGGCCTGAATGAATGATGATGG 22  
|||||||  
Sbjct: 2143 ACCGGACTTACTTACTACTACC 2122

>miR8741 Score: 0.0 R03G\_16749  
Query: 1 TGGCCTGAATGAATGATGATGG 22  
|||||||  
Sbjct: 2227 ACCGGACTTACTTACTACTACC 2206

>miR8741 Score: 0.0 R03G\_16136  
Query: 1 TGGCCTGAATGAATGATGATGG 22  
|||||||  
Sbjct: 2143 ACCGGACTTACTTACTACTACC 2122

>miR8741 Score: 0.0 R03G\_15889  
Query: 1 TGGCCTGAATGAATGATGATGG 22  
|||||||  
Sbjct: 2143 ACCGGACTTACTTACTACTACC 2122

>miR8741 Score: 0.0 R03G\_13145  
Query: 1 TGGCCTGAATGAATGATGATGG 22  
|||||||  
Sbjct: 2227 ACCGGACTTACTTACTACTACC 2206

>miR8741 Score: 0.0 R03G\_13273  
Query: 1 TGGCCTGAATGAATGATGATGG 22  
|||||||  
Sbjct: 2227 ACCGGACTTACTTACTACTACC 2206

>miR8741 Score: 1.2 R03G\_10735  
Query: 1 TGGCCTGAATGAATGATGATGG 22  
:\*|||||||  
Sbjct: 1672 GGCGGACTTACTTACTACTACC 1651

>miR8741 Score: 0.0 R03G\_10040  
Query: 1 TGGCCTGAATGAATGATGATGG 22  
|||||||  
Sbjct: 817 ACCGGACTTACTTACTACTACC 796

>miR8741 Score: 0.0 R03G\_10217

Query: 1 TGGCCTGAATGAATGATGATGG 22  
|||||  
Sbjct: 2227 ACCGGACTTACTTACTACTACC 2206  
>miR8741 Score: 0.0 R03G\_09183  
Query: 1 TGGCCTGAATGAATGATGATGG 22  
|||||  
Sbjct: 1360 ACCGGACTTACTTACTACTACC 1339  
>miR8741 Score: 0.0 R03G\_07697  
Query: 1 TGGCCTGAATGAATGATGATGG 22  
|||||  
Sbjct: 553 ACCGGACTTACTTACTACTACC 532  
>miR8741 Score: 0.0 R03G\_04592  
Query: 1 TGGCCTGAATGAATGATGATGG 22  
|||||  
Sbjct: 1399 ACCGGACTTACTTACTACTACC 1378  
>miR8741 Score: 0.0 R03G\_04681  
Query: 1 TGGCCTGAATGAATGATGATGG 22  
|||||  
Sbjct: 817 ACCGGACTTACTTACTACTACC 796  
>miR8741 Score: 0.0 R03G\_05424  
Query: 1 TGGCCTGAATGAATGATGATGG 22  
|||||  
Sbjct: 2143 ACCGGACTTACTTACTACTACC 2122  
>miR8741 Score: 0.0 R03G\_00289  
Query: 1 TGGCCTGAATGAATGATGATGG 22  
|||||  
Sbjct: 961 ACCGGACTTACTTACTACTACC 940  
>miR8741 Score: 0.0 R03G\_17351  
Query: 1 TGGCCTGAATGAATGATGATGG 22  
|||||  
Sbjct: 955 ACCGGACTTACTTACTACTACC 934  
>miR913-5p Score: 0.0 R03G\_16800  
Query: 1 TGACATCTTGCGAGACCGAGG 21  
|||||  
Sbjct: 492 ACTGTAGAACGCTCTGGCTCC 472  
>miR913-5p Score: 0.0 R03G\_15265  
Query: 1 TGACATCTTGCGAGACCGAGG 21  
|||||  
Sbjct: 492 ACTGTAGAACGCTCTGGCTCC 472  
>miR913-5p Score: 2.0 R03G\_15266  
Query: 1 TGACATCTTGCGAGACCGAGG 21  
\*|||||:|\*|||||  
Sbjct: 492 TCTGTAGAATGCCCTGGCTCC 472  
>miR913-5p Score: 0.0 R03G\_15268  
Query: 1 TGACATCTTGCGAGACCGAGG 21

|||||  
Sbjct: 492 ACTGTAGAACGCTCTGGCTCC 472  
>miR913-5p Score: 2.0 R03G\_14352  
Query: 1 TGACATCTTGCAGACCGAGG 21  
\*|||||:|\*|||||  
Sbjct: 492 TCTGTAGAATGCCCTGGCTCC 472  
>miR913-5p Score: 2.0 R03G\_13217  
Query: 1 TGACATCTTGCAGACCGAGG 21  
\*|||||:|\*|||||  
Sbjct: 492 TCTGTAGAATGCCCTGGCTCC 472  
>miR913-5p Score: 0.0 R03G\_13219  
Query: 1 TGACATCTTGCAGACCGAGG 21  
|||||  
Sbjct: 492 ACTGTAGAACGCTCTGGCTCC 472  
>miR913-5p Score: 0.0 R03G\_04121  
Query: 1 TGACATCTTGCAGACCGAGG 21  
|||||  
Sbjct: 492 ACTGTAGAACGCTCTGGCTCC 472  
>miR8603 Score: 2.5 R03G\_06113  
Query: 1 TGAGCTTGTGGTGAGCATTGT 21  
|||:|\*|||\*|||  
Sbjct: 1285 ACTCGAGCGCGACTCGT-ACA 1266  
>miR8603 Score: 2.5 R03G\_05236  
Query: 1 TGAGCTTGTGGTGAGCA-TTGT 21  
|:|:|||||:|||||\*|||  
Sbjct: 36 ATTTGAACACTACTCGTTAACA 15  
>miR8603 Score: 2.5 R03G\_02600  
Query: 1 TGAGCTTGTGGTGAGCATTGT 21  
|||||\*||\*|||||:|:|  
Sbjct: 970 ACTCGAAAACGACTCGTGATA 950  
>miR8603 Score: 2.5 R03G\_03300  
Query: 1 TGAGCTTGTGGTGAGCATTGT 21  
|||||:|\*||\*|||  
Sbjct: 199 ACTCGAACACTACCCGT-TCA 180  
>miR4401b Score: 2.5 R03G\_16714  
Query: 1 TCAAAGACGGTTGTGAGCAA 20  
||\*|||||\*||:|  
Sbjct: 206 AGATTCTGCCAACAGTTGTT 187  
>miR4401b Score: 0.0 R03G\_14983  
Query: 1 TCAAAGACGGTTGTGAGCAA 20  
|||||  
Sbjct: 653 AGTTTCTGCCAACACTCGTT 634  
>miR4401b Score: 0.0 R03G\_13914  
Query: 1 TCAAAGACGGTTGTGAGCAA 20  
|||||



Sbjct: 848 AGTTTCTGCCAACACTCGTT 829  
>miR4401b Score: 1.0 R03G\_12667  
Query: 1 TCAAAGACGGTTGTGAGCAA 20  
||\*||||||||||||||||||  
Sbjct: 218 AGGTTCTGCCAACACTCGTT 199  
>miR4401b Score: 0.0 R03G\_12058  
Query: 1 TCAAAGACGGTTGTGAGCAA 20  
||||||||||||||||||||  
Sbjct: 848 AGTTTCTGCCAACACTCGTT 829  
>miR4401b Score: 0.0 R03G\_10801  
Query: 1 TCAAAGACGGTTGTGAGCAA 20  
||||||||||||||||||||  
Sbjct: 653 AGTTTCTGCCAACACTCGTT 634  
>miR4401b Score: 0.0 R03G\_09614  
Query: 1 TCAAAGACGGTTGTGAGCAA 20  
||||||||||||||||||||  
Sbjct: 179 AGTTTCTGCCAACACTCGTT 160  
>miR4401b Score: 2.2 R03G\_08383  
Query: 1 TCAAAGACGGTTGTGAGCAA 20  
:|\*||||||:|:||||||  
Sbjct: 300 GGGTTCTGCCGACGCTCGTT 281  
>miR4401b Score: 0.0 R03G\_02233  
Query: 1 TCAAAGACGGTTGTGAGCAA 20  
||||||||||||||||||||  
Sbjct: 377 AGTTTCTGCCAACACTCGTT 358  
>miR4401b Score: 1.0 R03G\_03583  
Query: 1 TCAAAGACGGTTGTGAGCAA 20  
|||||||\*||||||||||  
Sbjct: 653 AGTTTCTGACAACACTCGTT 634  
>miR4401b Score: 2.5 R03G\_04116  
Query: 1 TCAAAGACGGTTGTGAGCAA 20  
||\*||||||||||\*|:|  
Sbjct: 213 AGATTCTGCCAACAGTTGTT 194  
>miR4401b Score: 0.0 R03G\_17462  
Query: 1 TCAAAGACGGTTGTGAGCAA 20  
||||||||||||||||||||  
Sbjct: 980 AGTTTCTGCCAACACTCGTT 961  
>miR4401b Score: 0.0 R03G\_17451  
Query: 1 TCAAAGACGGTTGTGAGCAA 20  
||||||||||||||||||||  
Sbjct: 89 AGTTTCTGCCAACACTCGTT 70  
>miR171n-5p Score: 2.2 R03G\_12220  
Query: 1 TATTGGTGGGTTCAAGTACGG 21  
\*\*|||||:||||||||||:|  
Sbjct: 316 TCAACCATCCAAGTTCATGTC 296



Query: 1 TTTCCAAATGTAGACAAAGC 20  
|||\*||\*|||||||  
Sbjct: 3101 AAAAGTCTACATCTGTTTCG 3082  
>miR158-3p Score: 2.5 R03G\_09886  
Query: 1 TTTCCAAATGTAGACAAAGC 20  
\*|||\*||||||\*|||||||  
Sbjct: 1726 TAAGCTTTACAACACTGTTTCG 1707  
>miR158-3p Score: 2.5 R03G\_07325  
Query: 1 TTTCCAAATGTAGACAAAGC 20  
|||\*|||||||:|||||||  
Sbjct: 1325 AAAAGTTTACATTGGTTTCG 1306  
>miR158-3p Score: 2.0 R03G\_05865  
Query: 1 TTTCCAAATGTAGACAAAGC 20  
|||\*||\*|||||||  
Sbjct: 2753 AAAAGTCTACATCTGTTTCG 2734  
>miR158-3p Score: 2.0 R03G\_06502  
Query: 1 TTTCCAAATGTAGACAAAGC 20  
|||\*||\*|||||||  
Sbjct: 2978 AAAAGTCTACATCTGTTTCG 2959  
>miR158-3p Score: 2.0 R03G\_02707  
Query: 1 TTTCCAAATGTAGACAAAGC 20  
|||\*||\*|||||||  
Sbjct: 650 AAAAGTCTACATCTGTTTCG 631  
>miR158-3p Score: 2.0 R03G\_02966  
Query: 1 TTTCCAAATGTAGACAAAGC 20  
|||\*||\*|||||||  
Sbjct: 2372 AAAAGTCTACATCTGTTTCG 2353  
>miR158-3p Score: 2.0 R03G\_03749  
Query: 1 TTTCCAAATGTAGACAAAGC 20  
|||\*||\*|||||||  
Sbjct: 3101 AAAAGTCTACATCTGTTTCG 3082  
>miR158-3p Score: 2.5 R03G\_00647  
Query: 1 TTTCCAAATGTAGACAAAGC 20  
\*|||||||\*||:||||\*|  
Sbjct: 4144 TAAGGTTTAGATTTGTTT-G 4126  
>miR158-3p Score: 2.0 R03G\_01733  
Query: 1 TTTCCAAATGTAGACAAAGC 20  
|||\*||\*|||||||  
Sbjct: 2903 AAAAGTCTACATCTGTTTCG 2884  
>miR158-3p Score: 2.0 R03G\_01944  
Query: 1 TTTCCAAATGTAGACAAAGC 20  
|||\*||\*|||||||  
Sbjct: 3101 AAAAGTCTACATCTGTTTCG 3082  
>miR158-3p Score: 1.0 R03G\_02126  
Query: 1 TTTCCAAATGTAGACAAA-GC 20

|||||||:|||||||\*||  
Sbjct: 540 AAAGGTTTGCATCTGTTTACG 520  
>miR158-3p Score: 2.0 R03G\_17446  
Query: 1 TTTCCAAATGTAGACAAAGC 20  
||\*||\*|||||||  
Sbjct: 3101 AAAAGTCTACATCTGTTTCG 3082  
>miR158-3p Score: 2.0 R03G\_17287  
Query: 1 TTTCCAAATGTAGACAAAGC 20  
||\*||\*|||||||  
Sbjct: 3101 AAAAGTCTACATCTGTTTCG 3082  
>miR1146 Score: 2.5 R03G\_05699  
Query: 1 TTGGGTCCGACGGGAAGTCTT 21  
|||||||:|:|\*|||||||  
Sbjct: 101 AACCCAGGTTGTTGTTTCAGAA 81  
>miR4414b Score: 0.5 R03G\_11767  
Query: 1 TGTGAATATGCGAGAGCCAAG 21  
|||||||\*||  
Sbjct: 559 AACTTATACGCTCTCGG-TC 540  
>miR4414b Score: 0.5 R03G\_17150  
Query: 1 TGTGAATATGCGAGAGCCAAG 21  
|||||||\*||  
Sbjct: 1405 AACTTATACGCTCTCGG-TC 1386  
>miR5219 Score: 0.5 R03G\_15231  
Query: 1 TCTGGACTCTCAGCTGCTGCGT 22  
|||||||\*||  
Sbjct: 554 AGACCTGAGAGTCGACGACACA 533  
>miR5219 Score: 0.5 R03G\_10585  
Query: 1 TCTGGACTCTCAGCTGCTGCGT 22  
|||||||\*||  
Sbjct: 155 AGACCTGAGAGTCGACGACACA 134  
>miR5219 Score: 1.0 R03G\_10900  
Query: 1 TCTGGACTCTCAGCTGCTGCGT 22  
||||\*|||||||  
Sbjct: 110 AGACCTAAGAGTCGACGACGCA 89  
>miR8762d Score: 2.5 R03G\_17223  
Query: 1 TTGTAACTTTGATCGATGTCT 22  
|||\*\*|||||||\*|  
Sbjct: 478 AACACCTGAAACTAGCTACAAA 457  
>miR8762d Score: 2.5 R03G\_16725  
Query: 1 TTGTAACTTTGATCGATGTCT 22  
|||\*\*|||||||\*|  
Sbjct: 496 AACACCTGAAACTAGCTACAAA 475  
>miR8762d Score: 2.5 R03G\_16742  
Query: 1 TTGTAACTTTGATCGATGTCT 22  
|||\*\*|||||||\*|

Sbjct: 754 AACACCTGAAACTAGCTACAAA 733  
>miR8762d Score: 2.5 R03G\_16706  
Query: 1 TTGTAAACTTTGATCGATGTCT 22  
||||\*\*||||||||||||||||\*|

Sbjct: 478 AACACCTGAAACTAGCTACAAA 457  
>miR8762d Score: 2.5 R03G\_16372  
Query: 1 TTGTAAACTTTGATCGATGTCT 22  
||||\*\*||||||||||||||||\*|

Sbjct: 754 AACACCTGAAACTAGCTACAAA 733  
>miR8762d Score: 2.5 R03G\_16420  
Query: 1 TTGTAAACTTTGATCGATGTCT 22  
||||\*\*||||||||||||||||\*|

Sbjct: 505 AACACCTGAAACTAGCTACAAA 484  
>miR8762d Score: 2.5 R03G\_16123  
Query: 1 TTGTAAACTTTGATCGATGTCT 22  
||||\*\*||||||||||||||||\*|

Sbjct: 754 AACACCTGAAACTAGCTACAAA 733  
>miR8762d Score: 2.5 R03G\_15271  
Query: 1 TTGTAAACTTTGATCGATGTCT 22  
||||\*\*||||||||||||||||\*|

Sbjct: 754 AACACCTGAAACTAGCTACAAA 733  
>miR8762d Score: 2.5 R03G\_15282  
Query: 1 TTGTAAACTTTGATCGATGTCT 22  
||||\*\*||||||||||||||||\*|

Sbjct: 478 AACACCTGAAACTAGCTACAAA 457  
>miR8762d Score: 2.5 R03G\_13714  
Query: 1 TTGTAAACTTTGATCGATGTCT 22  
||||\*\*||||||||||||||||\*|

Sbjct: 754 AACACCTGAAACTAGCTACAAA 733  
>miR8762d Score: 1.5 R03G\_13852  
Query: 1 TTGTAAACTTTGATCGATGTCT 22  
||||\*||||||||||||||||\*|

Sbjct: 505 AACACTTGAAACTAGCTACAAA 484  
>miR8762d Score: 2.5 R03G\_12663  
Query: 1 TTGTAAACTTTGATCGATGTCT 22  
||||\*\*||||||||||||||||\*|

Sbjct: 589 AACACCTGAAACTAGCTACAAA 568  
>miR8762d Score: 2.5 R03G\_11966  
Query: 1 TTGTAAACTTTGATCGATGTCT 22  
||||\*||||||||||||\*|||\*|

Sbjct: 754 AACATCTGAAACTAGCCACAAA 733  
>miR8762d Score: 2.5 R03G\_11781  
Query: 1 TTGTAAACTTTGATCGATGTCT 22  
||||\*\*||||||||||||||||\*|

Sbjct: 649 AACACCTGAAACTAGCTACAAA 628

>miR8762d Score: 2.5 R03G\_10729  
Query: 1 TTGTAAACTTTGATCGATGTCT 22  
||||\*|||||||\*|||\*|  
Sbjct: 754 AACATCTGAAACTAGCCACAAA 733

>miR8762d Score: 1.5 R03G\_10771  
Query: 1 TTGTAAACTTTGATCGATGTCT 22  
||||\*|||||||\*|  
Sbjct: 505 AACACTTGAAACTAGCTACAAA 484

>miR8762d Score: 2.5 R03G\_09193  
Query: 1 TTGTAAACTTTGATCGATGTCT 22  
||||\*\*|||||||\*|  
Sbjct: 478 AACACCTGAAACTAGCTACAAA 457

>miR8762d Score: 2.5 R03G\_07137  
Query: 1 TTGTAAACTTTGATCGATGTCT 22  
||||\*\*|||||||\*|  
Sbjct: 754 AACACCTGAAACTAGCTACAAA 733

>miR8762d Score: 2.5 R03G\_07702  
Query: 1 TTGTAAACTTTGATCGATGTCT 22  
||||\*\*|||||||\*|  
Sbjct: 505 AACACCTGAAACTAGCTACAAA 484

>miR8762d Score: 2.5 R03G\_07705  
Query: 1 TTGTAAACTTTGATCGATGTCT 22  
||||\*\*|||||||\*|  
Sbjct: 754 AACACCTGAAACTAGCTACAAA 733

>miR8762d Score: 1.5 R03G\_07739  
Query: 1 TTGTAAACTTTGATCGATGTCT 22  
||||\*|||||||\*|  
Sbjct: 505 AACACTTGAAACTAGCTACAAA 484

>miR8762d Score: 2.5 R03G\_07867  
Query: 1 TTGTAAACTTTGATCGATGTCT 22  
||||\*\*|||||||\*|  
Sbjct: 505 AACACCTGAAACTAGCTACAAA 484

>miR8762d Score: 2.5 R03G\_05640  
Query: 1 TTGTAAACTTTGATCGATGTCT 22  
||||\*\*|||||||\*|  
Sbjct: 649 AACACCTGAAACTAGCTACAAA 628

>miR8762d Score: 2.5 R03G\_05921  
Query: 1 TTGTAAACTTTGATCGATGTCT 22  
||||\*|||||||\*|||\*|  
Sbjct: 754 AACATCTGAAACTAGCCACAAA 733

>miR8762d Score: 2.5 R03G\_05939  
Query: 1 TTGTAAACTTTGATCGATGTCT 22  
||||\*|||||||\*|||\*|  
Sbjct: 754 AACATCTGAAACTAGCCACAAA 733

>miR8762d Score: 2.5 R03G\_05953

Query: 1 TTGTAACTTTGATCGATGTCT 22  
||||\*|||||||\*|||\*|  
Sbjct: 754 AACATCTGAACTAGCCACAAA 733  
>miR8762d Score: 2.5 R03G\_04327

Query: 1 TTGTAACTTTGATCGATGTCT 22  
||||\*|||\*|||||||\*||  
Sbjct: 864 AACATCTGACACTAGCTACCGA 843  
>miR8762d Score: 2.5 R03G\_04674

Query: 1 TTGTAACTTTGATCGATGTCT 22  
||||\*\*|||||||\*||  
Sbjct: 505 AACACCTGAACTAGCTACAAA 484  
>miR8762d Score: 2.5 R03G\_04695

Query: 1 TTGTAACTTTGATCGATGTCT 22  
||||\*\*|||||||\*||  
Sbjct: 544 AACACCTGAACTAGCTACAAA 523  
>miR8762d Score: 2.5 R03G\_05268

Query: 1 TTGTAACTTTGATCGATGTCT 22  
||||\*\*|||||||\*||  
Sbjct: 754 AACACCTGAACTAGCTACAAA 733  
>miR8762d Score: 2.5 R03G\_02824

Query: 1 TTGTAACTTTGATCGATGTCT 22  
||||\*\*|||||||\*||  
Sbjct: 754 AACACCTGAACTAGCTACAAA 733  
>miR8762d Score: 2.5 R03G\_01328

Query: 1 TTGTAACTTTGATCGATGTCT 22  
||||\*\*|||||||\*||  
Sbjct: 754 AACACCTGAACTAGCTACAAA 733  
>miR8762d Score: 2.5 R03G\_01962

Query: 1 TTGTAACTTTGATCGATGTCT 22  
||||\*\*|||||||\*||  
Sbjct: 505 AACACCTGAACTAGCTACAAA 484  
>miR8762d Score: 2.5 R03G\_17449

Query: 1 TTGTAACTTTGATCGATGTCT 22  
||||\*|||||||\*|||\*|  
Sbjct: 754 AACATCTGAACTAGCCACAAA 733  
>miR8762d Score: 2.5 R03G\_17416

Query: 1 TTGTAACTTTGATCGATGTCT 22  
||||\*\*|||||||\*||  
Sbjct: 754 AACACCTGAACTAGCTACAAA 733  
>miR8762d Score: 2.5 R03G\_17399

Query: 1 TTGTAACTTTGATCGATGTCT 22  
||||\*\*|||||||\*||  
Sbjct: 754 AACACCTGAACTAGCTACAAA 733  
>miR8762d Score: 2.5 R03G\_17387

Query: 1 TTGTAACTTTGATCGATGTCT 22

```
||||**||||||||||||||||*|
Sbjct: 754 AACACCTGAAACTAGCTACAAA 733
>miR8762d Score: 2.5 R03G_17355
Query: 1 TTGTAAACTTTGATCGATGTCT 22
||||**||||||||||||||||*|
Sbjct: 589 AACACCTGAAACTAGCTACAAA 568
>miR8762d Score: 2.5 R03G_17291
Query: 1 TTGTAAACTTTGATCGATGTCT 22
||||**||||||||||||||||*|
Sbjct: 754 AACACCTGAAACTAGCTACAAA 733
>miR1216 Score: 0.0 R03G_17261
Query: 1 TGATGGGTTAGCGCTTGTAC 20
|||||||||||||||||||||
Sbjct: 183 ACTACCCAATCGCGAACATG 164
>miR1216 Score: 0.0 R03G_16732
Query: 1 TGATGGGTTAGCGCTTGTAC 20
|||||||||||||||||||||
Sbjct: 183 ACTACCCAATCGCGAACATG 164
>miR1216 Score: 0.0 R03G_16813
Query: 1 TGATGGGTTAGCGCTTGTAC 20
|||||||||||||||||||||
Sbjct: 183 ACTACCCAATCGCGAACATG 164
>miR1216 Score: 0.0 R03G_14788
Query: 1 TGATGGGTTAGCGCTTGTAC 20
|||||||||||||||||||||
Sbjct: 116 ACTACCCAATCGCGAACATG 97
>miR1216 Score: 0.0 R03G_14792
Query: 1 TGATGGGTTAGCGCTTGTAC 20
|||||||||||||||||||||
Sbjct: 183 ACTACCCAATCGCGAACATG 164
>miR1216 Score: 0.0 R03G_14799
Query: 1 TGATGGGTTAGCGCTTGTAC 20
|||||||||||||||||||||
Sbjct: 183 ACTACCCAATCGCGAACATG 164
>miR1216 Score: 0.0 R03G_14801
Query: 1 TGATGGGTTAGCGCTTGTAC 20
|||||||||||||||||||||
Sbjct: 116 ACTACCCAATCGCGAACATG 97
>miR1216 Score: 0.0 R03G_09181
Query: 1 TGATGGGTTAGCGCTTGTAC 20
|||||||||||||||||||||
Sbjct: 183 ACTACCCAATCGCGAACATG 164
>miR1216 Score: 0.0 R03G_09190
Query: 1 TGATGGGTTAGCGCTTGTAC 20
|||||||||||||||||||||
```



Sbjct: 183 ACTACCCAATCGCGAACATG 164  
>miR2612 Score: 2.5 R03G\_13972  
Query: 1 TGATAGTGGCAGTAGTATCAG 21  
|:\*||||:|||||||\*|||

Sbjct: 88 ATCATCATCGTCATCATCGTC 68  
>miR2612 Score: 2.5 R03G\_13081  
Query: 1 TGATAGTGGCAGTAGTATCAG 21  
|:\*||||:|||||||\*||

Sbjct: 574 ATCATCATCGTCATCATACTC 554  
>miR2612 Score: 0.0 R03G\_13221  
Query: 1 TGATAGTGGCAGTAGTATCAG 21  
|||||||

Sbjct: 787 ACTATCACCGTCATCATAGTC 767  
>miR2612 Score: 1.0 R03G\_13224  
Query: 1 TGATAGTGGCAGTAGTATCAG 21  
|||||||\*|||||

Sbjct: 787 ACTATCACCGTCACCATAGTC 767  
>miR2612 Score: 2.5 R03G\_11742  
Query: 1 TGATAGTGGCAGTAGTATCAG 21  
|||:|:||||\*||||\*|

Sbjct: 823 ACTGTCGCCGTCTTCATAGAC 803  
>miR2612 Score: 2.5 R03G\_10462  
Query: 1 TGATAGTGGCAGTAGTATCAG 21  
|:||||:|||||||\*|\*\*

Sbjct: 379 ATTATCATCGTCATCATCGAA 359  
>miR2612 Score: 2.2 R03G\_11036  
Query: 1 TGATAGTGGCAGTAGTATCAG 21  
||||:|:|||:|:||||:|

Sbjct: 1294 ACTATTATCGTTGTCATGGTC 1274  
>miR2612 Score: 2.0 R03G\_08172  
Query: 1 TGATAGTGGCAGTAGTATCAG 21  
|||||:|:|||:|||||||\*

Sbjct: 625 ACTATCGTCGTTATCATAGTA 605  
>miR2612 Score: 2.5 R03G\_09062  
Query: 1 TGATAGTGGCAGTAGTATCAG 21  
|||||:|:||||:||||\*\*||

Sbjct: 64 ACTATCGTCGTCGTCATCATC 44  
>miR2612 Score: 2.5 R03G\_04278  
Query: 1 TGATAGTGGCAGTAGTATCAG 21  
|:||||:|:|||||||\*|||

Sbjct: 1357 ATTATCGTCGTCATCGTCGTC 1337  
>miR2612 Score: 2.2 R03G\_02581  
Query: 1 TGATAGTGGCAGTAGTATCAG 21  
|||\*|||||||:||||\*|:

Sbjct: 163 ACTCTCACCGTCGTCATATTT 143

>miR2612 Score: 2.5 R03G\_02911  
Query: 1 TGATAGTGGCAGTAGTATCAG 21  
|||||:|||||\*:|||||  
Sbjct: 133 ACTATCGTCGTCATAGTAGTC 113

>miR2612 Score: 2.0 R03G\_03005  
Query: 1 TGATAGTGGCAGTAGTATCAG 21  
::|||||:|||||\*|||:  
Sbjct: 127 GTTATCACCGTCATTATTGTT 107

>miR2612 Score: 2.5 R03G\_03352  
Query: 1 TGATAGTGGCAGTAGTATCAG 21  
|||||:|\*|||||\*|||  
Sbjct: 739 ACTATCATCATCATCATTATC 719

>miR2612 Score: 2.2 R03G\_03879  
Query: 1 TGATAGTGGCAGTAGTATCAG 21  
|:|||||:|||||:|||||:  
Sbjct: 136 ATTATCATCGTCATTGTAGTT 116

>miR2612 Score: 1.0 R03G\_04120  
Query: 1 TGATAGTGGCAGTAGTATCAG 21  
|||||:|\*|||||\*|||  
Sbjct: 787 ACTATCACCGTCACCATAGTC 767

>miR2612 Score: 1.0 R03G\_04123  
Query: 1 TGATAGTGGCAGTAGTATCAG 21  
|||||:|\*|||||\*|||  
Sbjct: 787 ACTATCACCGTCACCATAGTC 767

>miR2612 Score: 2.5 R03G\_00855  
Query: 1 TGATAGTGGCAGTAGTATCAG 21  
|||||:|:|:|:|:|\*|||  
Sbjct: 1111 ACTATTACTGTCGTCGTA-TC 1092

>miR2612 Score: 2.5 R03G\_00887  
Query: 1 TGATAGTGGCAGTAGTATCAG 21  
|:\*|||||:|\*|||  
Sbjct: 367 ATCATCACCGTCATCAT-CTC 348

>miR2612 Score: 2.5 R03G\_01770  
Query: 1 TGATAGTGGCAGTAGTATCAG 21  
|:|:|:|:|:|:|\*|||  
Sbjct: 637 ATTGTCATCGTCGTCATTGTC 617

>miR2612 Score: 1.0 R03G\_17093  
Query: 1 TGATAGTGGCAGTAGTATCAG 21  
|||||:|\*|||||\*|||  
Sbjct: 547 ACTATCACCGTCACCATAGTC 527

>miR1148.2 Score: 1.0 R03G\_17296  
Query: 1 TGGAGATCCGCCTGTGCCGGG 21  
|||||:|\*|||||\*|||  
Sbjct: 140 ACCTCTAGGCGGCCACGGCCC 120

>miR6476a Score: 2.5 R03G\_04527

Query: 1 TCGGTAGGTGATGAACATGA 20  
||:||||:|||||\*||\*|  
Sbjct: 799 AGTCATCTACTACTAGTAGT 780  
>miR5021 Score: 2.5 R03G\_14233  
Query: 1 TGACGATAGAAGAAGGAAAA 20  
\*:\*|:|||||||  
Sbjct: 1123 CTAGTTATCTTCTTCCTTTT 1104  
>miR5021 Score: 0.0 R03G\_12949  
Query: 1 TGACGATAGAAGAAGGAAAA 20  
|||||||  
Sbjct: 721 ACTGCTATCTTCTTCCTTTT 702  
>miR5021 Score: 2.0 R03G\_10250  
Query: 1 TGACGATAGAAGAAGGAAAA 20  
||||\*||\*|  
Sbjct: 256 ACTGATACCTTCTTCCTTTT 237  
>miR5021 Score: 2.5 R03G\_09758  
Query: 1 TGACGATAGAAGAAGGAA-AA 20  
||\*||:||||||:|\*||  
Sbjct: 1978 ACTACTGTCTTCTTCTTTGTT 1958  
>miR5021 Score: 2.5 R03G\_08015  
Query: 1 TGACGATAGAAGAAGGAAAA 20  
||||\*|:||||||:|\*|  
Sbjct: 1231 ACTGTAATCTTCTTCTTTAT 1212  
>miR5021 Score: 2.5 R03G\_04304  
Query: 1 TGACGATAGAAGAAGGAAAA 20  
|||||\*|:|||||||\*|  
Sbjct: 1141 ACTGCTGGTTTCTTCCTTGT 1122  
>miR5021 Score: 0.0 R03G\_04050  
Query: 1 TGACGATAGAAGAAGGAAAA 20  
|||||||  
Sbjct: 1276 ACTGCTATCTTCTTCCTTTT 1257  
>miR5021 Score: 0.0 R03G\_00301  
Query: 1 TGACGATAGAAGAAGGAAAA 20  
|||||||  
Sbjct: 2560 ACTGCTATCTTCTTCCTTTT 2541  
>miR6025e Score: 2.0 R03G\_17214  
Query: 1 TGCCATTATAGATCTGACATGC 22  
|||||:||\*|:|||||||  
Sbjct: 622 ACGGTAGTATGTGGACTGTACG 601  
>miR6025e Score: 0.0 R03G\_17223  
Query: 1 TGCCATTATAGATCTGACATGC 22  
|||||||  
Sbjct: 346 ACGGTAATATCTAGACTGTACG 325  
>miR6025e Score: 0.5 R03G\_17017  
Query: 1 TGCCATTATAGATCTGACATGC 22

|:|||||||||||||||||  
Sbjct: 622 ATGGTAATATCTAGACTGTACG 601  
>miR6025e Score: 1.0 R03G\_16725  
Query: 1 TGCCATTATAGATCTGACATGC 22  
|:||||:|||||||||||||  
Sbjct: 364 ATGGTAGTATCTAGACTGTACG 343  
>miR6025e Score: 0.0 R03G\_16742  
Query: 1 TGCCATTATAGATCTGACATGC 22  
|||||||||||||||||  
Sbjct: 622 ACGGTAATATCTAGACTGTACG 601  
>miR6025e Score: 1.5 R03G\_16689  
Query: 1 TGCCATTATAGATCTGACATGC 22  
|||||:||||\*|||||||||  
Sbjct: 622 ACGGTAGTATATAGACTGTACG 601  
>miR6025e Score: 2.5 R03G\_16698  
Query: 1 TGCCATTATAGATCTGACATGC 22  
|:||||:||||\*||||||||\*  
Sbjct: 619 ATGGTAGTATCCAGACTGTACA 598  
>miR6025e Score: 0.0 R03G\_16706  
Query: 1 TGCCATTATAGATCTGACATGC 22  
|||||||||||||||||  
Sbjct: 346 ACGGTAATATCTAGACTGTACG 325  
>miR6025e Score: 0.0 R03G\_16372  
Query: 1 TGCCATTATAGATCTGACATGC 22  
|||||||||||||||||  
Sbjct: 622 ACGGTAATATCTAGACTGTACG 601  
>miR6025e Score: 0.5 R03G\_16420  
Query: 1 TGCCATTATAGATCTGACATGC 22  
|:|||||||||||||||||  
Sbjct: 373 ATGGTAATATCTAGACTGTACG 352  
>miR6025e Score: 0.5 R03G\_16123  
Query: 1 TGCCATTATAGATCTGACATGC 22  
|||||:|||||||||||||  
Sbjct: 622 ACGGTAGTATCTAGACTGTACG 601  
>miR6025e Score: 2.0 R03G\_15866  
Query: 1 TGCCATTATAGATCTGACATGC 22  
|||||:||||\*|:|||||||||  
Sbjct: 346 ACGGTAGTATGTGGACTGTACG 325  
>miR6025e Score: 1.0 R03G\_15271  
Query: 1 TGCCATTATAGATCTGACATGC 22  
|:||||:|||||||||||||  
Sbjct: 622 ATGGTAGTATCTAGACTGTACG 601  
>miR6025e Score: 0.5 R03G\_15282  
Query: 1 TGCCATTATAGATCTGACATGC 22  
|:|||||||||||||||||

Sbjct: 346 ATGGTAATATCTAGACTGTACG 325  
>miR6025e Score: 0.5 R03G\_15261  
Query: 1 TGCCATTATAGATCTGACATGC 22  
|||||:|||||  
Sbjct: 622 ACGGTAGTATCTAGACTGTACG 601  
>miR6025e Score: 1.5 R03G\_14361  
Query: 1 TGCCATTATAGATCTGACATGC 22  
|||||:||||\*|||||  
Sbjct: 622 ACGGTAGTATATAGACTGTACG 601  
>miR6025e Score: 0.5 R03G\_14555  
Query: 1 TGCCATTATAGATCTGACATGC 22  
|:|||||  
Sbjct: 250 ATGGTAATATCTAGACTGTACG 229  
>miR6025e Score: 2.0 R03G\_14568  
Query: 1 TGCCATTATAGATCTGACATGC 22  
|||||:||||\*|:|||||  
Sbjct: 622 ACGGTAGTATATGGACTGTACG 601  
>miR6025e Score: 0.5 R03G\_14770  
Query: 1 TGCCATTATAGATCTGACATGC 22  
|:|||||  
Sbjct: 622 ATGGTAATATCTAGACTGTACG 601  
>miR6025e Score: 0.5 R03G\_14786  
Query: 1 TGCCATTATAGATCTGACATGC 22  
|:|||||  
Sbjct: 250 ATGGTAATATCTAGACTGTACG 229  
>miR6025e Score: 0.0 R03G\_13714  
Query: 1 TGCCATTATAGATCTGACATGC 22  
|||||  
Sbjct: 622 ACGGTAATATCTAGACTGTACG 601  
>miR6025e Score: 1.5 R03G\_13852  
Query: 1 TGCCATTATAGATCTGACATGC 22  
|:||||:|||||\*  
Sbjct: 373 ATGGTAGTATCTAGACTGTACA 352  
>miR6025e Score: 2.0 R03G\_12663  
Query: 1 TGCCATTATAGATCTGACATGC 22  
|||||:|||:\*|||||  
Sbjct: 457 ACGGTAGTATTCAGACTGTACG 436  
>miR6025e Score: 1.5 R03G\_11962  
Query: 1 TGCCATTATAGATCTGACATGC 22  
|:|||||\*|||||  
Sbjct: 346 ATGGTAATCTCTAGACTGTACG 325  
>miR6025e Score: 2.0 R03G\_11966  
Query: 1 TGCCATTATAGATCTGACATGC 22  
|||||:||||\*|||||\*||  
Sbjct: 622 ACGGTAGTATATAGACTGTCCG 601

>miR6025e Score: 0.5 R03G\_11235  
Query: 1 TGCCATTATAGATCTGACATGC 22  
|:||||||||||||||||||  
Sbjct: 517 ATGGTAATATCTAGACTGTACG 496

>miR6025e Score: 1.5 R03G\_11264  
Query: 1 TGCCATTATAGATCTGACATGC 22  
|||||:||||\*|||||||  
Sbjct: 622 ACGGTAGTATATAGACTGTACG 601

>miR6025e Score: 0.5 R03G\_11781  
Query: 1 TGCCATTATAGATCTGACATGC 22  
|:||||||||||||||||||  
Sbjct: 517 ATGGTAATATCTAGACTGTACG 496

>miR6025e Score: 2.0 R03G\_10729  
Query: 1 TGCCATTATAGATCTGACATGC 22  
|||||:||||\*|:|||||||  
Sbjct: 622 ACGGTAGTATATGGACTGTACG 601

>miR6025e Score: 1.5 R03G\_10771  
Query: 1 TGCCATTATAGATCTGACATGC 22  
|:||||:||||||||||||||\*  
Sbjct: 373 ATGGTAGTATCTAGACTGTACA 352

>miR6025e Score: 2.0 R03G\_10773  
Query: 1 TGCCATTATAGATCTGACATGC 22  
|||||:||||\*|:|||||||  
Sbjct: 622 ACGGTAGTATGTGGACTGTACG 601

>miR6025e Score: 1.0 R03G\_10779  
Query: 1 TGCCATTATAGATCTGACATGC 22  
|:|||||||:|||||||||||  
Sbjct: 238 ATGGTAATATTTAGACTGTACG 217

>miR6025e Score: 2.0 R03G\_10780  
Query: 1 TGCCATTATAGATCTGACATGC 22  
|||||:||||\*|:|||||||  
Sbjct: 622 ACGGTAGTATGTGGACTGTACG 601

>miR6025e Score: 0.5 R03G\_10795  
Query: 1 TGCCATTATAGATCTGACATGC 22  
|:||||||||||||||||||  
Sbjct: 622 ATGGTAATATCTAGACTGTACG 601

>miR6025e Score: 2.0 R03G\_10798  
Query: 1 TGCCATTATAGATCTGACATGC 22  
|||||:||||\*|:|||||||  
Sbjct: 622 ACGGTAGTATATGGACTGTACG 601

>miR6025e Score: 0.0 R03G\_09193  
Query: 1 TGCCATTATAGATCTGACATGC 22  
||||||||||||||||||  
Sbjct: 346 ACGGTAAATATCTAGACTGTACG 325

>miR6025e Score: 2.0 R03G\_09194

Query: 1 TGCCATTATAGATCTGACATGC 22  
|||||:||||\*|||||||\*||  
Sbjct: 622 ACGGTAGTATATAGACTGTCCG 601  
>miR6025e Score: 2.0 R03G\_09542

Query: 1 TGCCATTATAGATCTGACATGC 22  
|||||:||||\*|:|||||||  
Sbjct: 622 ACGGTAGTATATGGACTGTACG 601  
>miR6025e Score: 1.5 R03G\_09945

Query: 1 TGCCATTATAGATCTGACATGC 22  
|||||:||||\*|||||||  
Sbjct: 346 ACGGTAGTATATAGACTGTACG 325  
>miR6025e Score: 2.0 R03G\_09967

Query: 1 TGCCATTATAGATCTGACATGC 22  
|||||:||||\*|||||||\*||  
Sbjct: 622 ACGGTAGTATATAGACTGTCCG 601  
>miR6025e Score: 2.5 R03G\_07984

Query: 1 TGCCATTATAGATCTGACATGC 22  
|:||||:||||\*|||||||\*  
Sbjct: 622 ATGGTAGTATCCAGACTGTACA 601  
>miR6025e Score: 0.5 R03G\_06735

Query: 1 TGCCATTATAGATCTGACATGC 22  
|:|||||||  
Sbjct: 346 ATGGTAATATCTAGACTGTACG 325  
>miR6025e Score: 1.5 R03G\_07124

Query: 1 TGCCATTATAGATCTGACATGC 22  
|||||:||||\*|||||||  
Sbjct: 622 ACGGTAGTATGTAGACTGTACG 601  
>miR6025e Score: 0.5 R03G\_07137

Query: 1 TGCCATTATAGATCTGACATGC 22  
|||||:|||||||  
Sbjct: 622 ACGGTAGTATCTAGACTGTACG 601  
>miR6025e Score: 0.5 R03G\_07702

Query: 1 TGCCATTATAGATCTGACATGC 22  
|:|||||||  
Sbjct: 373 ATGGTAATATCTAGACTGTACG 352  
>miR6025e Score: 0.5 R03G\_07705

Query: 1 TGCCATTATAGATCTGACATGC 22  
|:|||||||  
Sbjct: 622 ATGGTAATATCTAGACTGTACG 601  
>miR6025e Score: 1.0 R03G\_07739

Query: 1 TGCCATTATAGATCTGACATGC 22  
|:||||:|||||||  
Sbjct: 373 ATGGTAGTATCTAGACTGTACG 352  
>miR6025e Score: 2.0 R03G\_07860

Query: 1 TGCCATTATAGATCTGACATGC 22

|||||:||||\*|||||||\*||  
Sbjct: 622 ACGGTAGTATATAGACTGTCCG 601  
>miR6025e Score: 0.5 R03G\_07867  
Query: 1 TGCCATTATAGATCTGACATGC 22  
|||||:|||||||  
Sbjct: 373 ACGGTAGTATCTAGACTGTACG 352  
>miR6025e Score: 2.5 R03G\_07876  
Query: 1 TGCCATTATAGATCTGACATGC 22  
|:||||:||||\*|:|||||||  
Sbjct: 496 ATGGTAGTATATGGACTGTACG 475  
>miR6025e Score: 1.0 R03G\_05632  
Query: 1 TGCCATTATAGATCTGACATGC 22  
|\*|||||||  
Sbjct: 307 AGGGTAATATCTAGACTGTACG 286  
>miR6025e Score: 0.5 R03G\_05640  
Query: 1 TGCCATTATAGATCTGACATGC 22  
|||||:|||||||  
Sbjct: 517 ACGGTAGTATCTAGACTGTACG 496  
>miR6025e Score: 1.5 R03G\_05921  
Query: 1 TGCCATTATAGATCTGACATGC 22  
|||||:||||\*|||||||  
Sbjct: 622 ACGGTAGTATATAGACTGTACG 601  
>miR6025e Score: 1.5 R03G\_05939  
Query: 1 TGCCATTATAGATCTGACATGC 22  
|||||:||||\*|||||||  
Sbjct: 622 ACGGTAGTATGTAGACTGTACG 601  
>miR6025e Score: 2.5 R03G\_05953  
Query: 1 TGCCATTATAGATCTGACATGC 22  
|:||||:||||\*|||||||\*||  
Sbjct: 622 ATGGTAGTATATAGACTGTCCG 601  
>miR6025e Score: 2.0 R03G\_05959  
Query: 1 TGCCATTATAGATCTGACATGC 22  
|||||:||||\*|||||||\*||  
Sbjct: 622 ACGGTAGTATATAGACTGTCCG 601  
>miR6025e Score: 0.5 R03G\_06417  
Query: 1 TGCCATTATAGATCTGACATGC 22  
|:|||||||  
Sbjct: 250 ATGGTAATATCTAGACTGTACG 229  
>miR6025e Score: 1.0 R03G\_06433  
Query: 1 TGCCATTATAGATCTGACATGC 22  
|:|||||||:|||||||  
Sbjct: 346 ATGGTAATATTTAGACTGTACG 325  
>miR6025e Score: 0.5 R03G\_06717  
Query: 1 TGCCATTATAGATCTGACATGC 22  
|||||:|||||||



Sbjct: 622 ACGGTAGTATCTAGACTGTACG 601  
>miR6025e Score: 0.5 R03G\_04674  
Query: 1 TGCCATTATAGATCTGACATGC 22  
|||||:|||||

Sbjct: 373 ACGGTAGTATCTAGACTGTACG 352  
>miR6025e Score: 0.0 R03G\_04682  
Query: 1 TGCCATTATAGATCTGACATGC 22  
|||||:|||||

Sbjct: 622 ACGGTAATATCTAGACTGTACG 601  
>miR6025e Score: 0.5 R03G\_04695  
Query: 1 TGCCATTATAGATCTGACATGC 22  
|||||:|||||

Sbjct: 412 ACGGTAGTATCTAGACTGTACG 391  
>miR6025e Score: 2.0 R03G\_05267  
Query: 1 TGCCATTATAGATCTGACATGC 22  
|||||:|||\*|||||\*||

Sbjct: 622 ACGGTAGTATATAGACTGTCCG 601  
>miR6025e Score: 0.5 R03G\_05268  
Query: 1 TGCCATTATAGATCTGACATGC 22  
|||||:|||||

Sbjct: 622 ACGGTAGTATCTAGACTGTACG 601  
>miR6025e Score: 0.0 R03G\_02824  
Query: 1 TGCCATTATAGATCTGACATGC 22  
|||||:|||||

Sbjct: 622 ACGGTAATATCTAGACTGTACG 601  
>miR6025e Score: 1.5 R03G\_03591  
Query: 1 TGCCATTATAGATCTGACATGC 22  
|:|||||:|||:|||||

Sbjct: 238 ATGGTAATATTTAGGCTGTACG 217  
>miR6025e Score: 2.0 R03G\_04117  
Query: 1 TGCCATTATAGATCTGACATGC 22  
|:||||:||||\*|||||

Sbjct: 517 ATGGTAGTATCCAGACTGTACG 496  
>miR6025e Score: 1.5 R03G\_04207  
Query: 1 TGCCATTATAGATCTGACATGC 22  
|||||:|||\*|||||

Sbjct: 622 ACGGTAGTATATAGACTGTACG 601  
>miR6025e Score: 2.0 R03G\_04210  
Query: 1 TGCCATTATAGATCTGACATGC 22  
|||||:|||\*|:|||||

Sbjct: 622 ACGGTAGTATGTGGACTGTACG 601  
>miR6025e Score: 2.5 R03G\_00238  
Query: 1 TGCCATTATAGATCTGACATGC 22  
|:||||:||||\*|||||\*|

Sbjct: 622 ATGGTAGTATCCAGACTGTACA 601

>miR6025e Score: 2.0 R03G\_00256  
Query: 1 TGCCATTATAGATCTGACATGC 22  
|||||:||||\*|||||||\*||  
Sbjct: 622 ACGGTAGTATATAGACTGTCCG 601

>miR6025e Score: 2.5 R03G\_01205  
Query: 1 TGCCATTATAGATCTGACATGC 22  
|:||||:||||\*|||||||\*  
Sbjct: 622 ATGGTAGTATCCAGACTGTACA 601

>miR6025e Score: 0.5 R03G\_01328  
Query: 1 TGCCATTATAGATCTGACATGC 22  
|||||:|||||||  
Sbjct: 622 ACGGTAGTATCTAGACTGTACG 601

>miR6025e Score: 1.5 R03G\_01942  
Query: 1 TGCCATTATAGATCTGACATGC 22  
|||||:||||\*|||||||  
Sbjct: 619 ACGGTAGTATATAGACTGTACG 598

>miR6025e Score: 0.0 R03G\_01962  
Query: 1 TGCCATTATAGATCTGACATGC 22  
|||||||  
Sbjct: 373 ACGGTAATATCTAGACTGTACG 352

>miR6025e Score: 1.5 R03G\_17449  
Query: 1 TGCCATTATAGATCTGACATGC 22  
|||||:||||\*|||||||  
Sbjct: 622 ACGGTAGTATATAGACTGTACG 601

>miR6025e Score: 0.0 R03G\_17416  
Query: 1 TGCCATTATAGATCTGACATGC 22  
|||||||  
Sbjct: 622 ACGGTAATATCTAGACTGTACG 601

>miR6025e Score: 1.5 R03G\_17399  
Query: 1 TGCCATTATAGATCTGACATGC 22  
||\*|||:|||||||  
Sbjct: 622 ACAGTAGTATCTAGACTGTACG 601

>miR6025e Score: 0.5 R03G\_17387  
Query: 1 TGCCATTATAGATCTGACATGC 22  
|||||:|||||||  
Sbjct: 622 ACGGTAGTATCTAGACTGTACG 601

>miR6025e Score: 0.0 R03G\_17355  
Query: 1 TGCCATTATAGATCTGACATGC 22  
|||||||  
Sbjct: 457 ACGGTAATATCTAGACTGTACG 436

>miR6025e Score: 0.0 R03G\_17291  
Query: 1 TGCCATTATAGATCTGACATGC 22  
|||||||  
Sbjct: 622 ACGGTAATATCTAGACTGTACG 601

>miR6025e Score: 1.0 R03G\_17277

Query: 1 TGCCATTATAGATCTGACATGC 22  
|:|||||||:|||||||  
Sbjct: 106 ATGGTAATATTTAGACTGTACG 85  
>miR9553-3p Score: 2.5 R03G\_16362  
Query: 1 TAATCATCCCAGCTATGAACAT 22  
||\*|||||||:||||\*||\*|  
Sbjct: 3050 ATAAGTAGGGTTGATACCTGGA 3029  
>miR9553-3p Score: 0.0 R03G\_11541  
Query: 1 TAATCATCCCAGCTATGAACAT 22  
|||||||  
Sbjct: 1076 ATTAGTAGGGTCGATACTTGTA 1055  
>miR9553-3p Score: 0.0 R03G\_09175  
Query: 1 TAATCATCCCAGCTATGAACAT 22  
|||||||  
Sbjct: 3686 ATTAGTAGGGTCGATACTTGTA 3665  
>miR9553-3p Score: 0.0 R03G\_02695  
Query: 1 TAATCATCCCAGCTATGAACAT 22  
|||||||  
Sbjct: 3686 ATTAGTAGGGTCGATACTTGTA 3665  
>miR9553-3p Score: 0.0 R03G\_03550  
Query: 1 TAATCATCCCAGCTATGAACAT 22  
|||||||  
Sbjct: 3686 ATTAGTAGGGTCGATACTTGTA 3665  
>miR2868 Score: 2.5 R03G\_16417  
Query: 1 TTGATTTTGTGTAGTAGCA 20  
|||||:|||||:|\*||\*|  
Sbjct: 747 AACTAAGACAACGTAATC-T 729  
>miR2868 Score: 2.5 R03G\_15310  
Query: 1 TTGATTTTGTGTAGTAGCA 20  
|||||:|\*||:||||\*|  
Sbjct: 670 AACTAGAAAAATATCATC-T 652  
>miR2868 Score: 2.5 R03G\_14147  
Query: 1 TTGATTTTGTGTAGTAGCA 20  
|||||||:||:|\*||\*||  
Sbjct: 1154 AACTAAAATAATAACAT-GT 1136  
>miR2868 Score: 0.0 R03G\_14217  
Query: 1 TTGATTTTGTGTAGTAGCA 20  
|||||||  
Sbjct: 618 AACTAAAACAACATCATCGT 599  
>miR2868 Score: 2.5 R03G\_13385  
Query: 1 TTGATTTTGTGTAGTAGCA 20  
|||||||\*||\*||\*|  
Sbjct: 111 AACTAAAACAACAACAAC-T 93  
>miR2868 Score: 0.0 R03G\_13590  
Query: 1 TTGATTTTGTGTAGTAGCA 20

|||||  
Sbjct: 618 AACTAAAACAACATCATCGT 599  
>miR2868 Score: 2.5 R03G\_12098  
Query: 1 TTGATTTTGTGTAGTAGCA 20  
\*||||:|||||:||\*\*  
Sbjct: 393 TACTAGAACAACATTATCAA 374  
>miR2868 Score: 2.5 R03G\_11324  
Query: 1 TTGATTTTGTGTAGTAGCA 20  
\*||\*|||||:||||  
Sbjct: 151 CACCAAAAACAACATTGTCGT 132  
>miR2868 Score: 0.2 R03G\_11515  
Query: 1 TTGATTTTGTGTAGTAGCA 20  
:|||||  
Sbjct: 351 GACTAAAACAACATCATCGT 332  
>miR2868 Score: 2.5 R03G\_11675  
Query: 1 TTGATTTTGTGTAGTAGCA 20  
||\*||:||:||||:||||  
Sbjct: 598 AACGAAGACGACATCGTCGT 579  
>miR2868 Score: 2.2 R03G\_10461  
Query: 1 TTGATTTTGTGTAGTAGCA 20  
|\*\*|||||:||  
Sbjct: 79 ATATAAAAACAACATCATTGT 60  
>miR2868 Score: 2.0 R03G\_10856  
Query: 1 TTGATTTTGTGTAGTAGCA 20  
||\*|||||:||||:||||  
Sbjct: 660 AAGTAAAACGACATTATCGT 641  
>miR2868 Score: 2.0 R03G\_09230  
Query: 1 TTGATTTTGTGTAGTAGCA 20  
\*||\*|||||\*|  
Sbjct: 214 CACGAAAACAACATCATCAT 195  
>miR2868 Score: 2.5 R03G\_08621  
Query: 1 TTGATTTTGTGTAGTAGCA 20  
||\*||\*|||||\*|  
Sbjct: 760 AACGACAACAACATCATCTT 741  
>miR2868 Score: 2.5 R03G\_08992  
Query: 1 TTGATTTTGTGTAGTAGCA 20  
||\*|||||:|\*|||  
Sbjct: 686 AACAAAAACAACATTA-CGT 668  
>miR2868 Score: 2.0 R03G\_07279  
Query: 1 TTGATTTTGTGTAGTAGCA 20  
||\*||:||||:|||||  
Sbjct: 3169 AACAAAGACAATATCATCGT 3150  
>miR2868 Score: 2.5 R03G\_07846  
Query: 1 TTGATTTTGTGTAGTAGCA 20  
|||||:|\*\*|\*

Sbjct: 857 AACTAAAACAACATTA-GGA 839  
>miR2868 Score: 2.2 R03G\_06097  
Query: 1 TTGATTTTGTGTTGTAGTAGCA 20  
::||||:|\*|||||||

Sbjct: 388 GGCTAAGAGAACATCATCGT 369  
>miR2868 Score: 2.5 R03G\_06532  
Query: 1 TTGATTTTGTGTTGTAGTAGCA 20  
\*|||||||:|||||\*||\*

Sbjct: 669 TACTAAAACGACATCAACGA 650  
>miR2868 Score: 2.2 R03G\_04479  
Query: 1 TTGATTTTGTGTTGTAGTAGCA 20  
|||||:||\*||||:||:|

Sbjct: 549 AACTAAGACCACATTATTGT 530  
>miR2868 Score: 2.5 R03G\_02514  
Query: 1 TTGATTTTGTGTTGTAGTAGCA 20  
|||||||\*|||:||||\*|\*

Sbjct: 561 AACTAAAAGAACGTCATAGA 542  
>miR2868 Score: 2.5 R03G\_03026  
Query: 1 TTGATTTTGTGTTGTAGTAGCA 20  
|||||||\*|||\*|\*|

Sbjct: 37 AACTAAAACAACATATTC-T 19  
>miR2868 Score: 2.0 R03G\_03130  
Query: 1 TTGATTTTGTGTTGTAGTAGCA 20  
|||||||:|||||\*|||

Sbjct: 928 AACTAAAGTAACATCTTCGT 909  
>miR2868 Score: 2.5 R03G\_03352  
Query: 1 TTGATTTTGTGTTGTAGTAGCA 20  
|||\*|\*|||||||\*|

Sbjct: 667 AACACAACAACATCATCTT 648  
>miR2868 Score: 0.5 R03G\_03617  
Query: 1 TTGATTTTGTGTTGTAGTAGCA 20  
|||||||\*|||:||||

Sbjct: 1587 AACTAAAACAACATCGTCGT 1568  
>miR2868 Score: 2.2 R03G\_03720  
Query: 1 TTGATTTTGTGTTGTAGTAGCA 20  
|||\*|\*|||||||\*|

Sbjct: 352 AACGACAACAACATCATTGT 333  
>miR2868 Score: 2.5 R03G\_03818  
Query: 1 TTGATTTTGTGTTGTAGTAGCA 20  
|||\*|\*|||||||:||||

Sbjct: 1756 AACGACAACAACATCGTCGT 1737  
>miR2868 Score: 2.5 R03G\_03950  
Query: 1 TTGATTTTGTGTTGTAGTAGCA 20  
|||\*|\*|||||||\*|

Sbjct: 373 AACGACAACAACATCATCAT 354

>miR2868 Score: 0.5 R03G\_04048  
Query: 1 TTGATTTTGTGTAGTAGCA 20  
|||||  
Sbjct: 1527 AACTAAAACAACATCGTCGT 1508

>miR2868 Score: 2.0 R03G\_04201  
Query: 1 TTGATTTTGTGTAGTAGCA 20  
::|||\*|  
Sbjct: 792 GGCTAAAACAACATTATT-T 774

>miR2868 Score: 2.5 R03G\_04209  
Query: 1 TTGATTTTGTGTAGTAGCA 20  
|||\*||\*|  
Sbjct: 85 AACTAAAAAATATTATAGT 66

>miR2868 Score: 2.2 R03G\_00028  
Query: 1 TTGATTTTGTGTAGTAG-CA 20  
|\*|||\*|  
Sbjct: 791 ACCTAAAACAACATCGTTCGT 771

>miR2868 Score: 2.5 R03G\_00451  
Query: 1 TTGATTTTGTGTAGTAGCA 20  
|||:|\*||\*|  
Sbjct: 298 AACTAGAATAACAACATCGA 279

>miR2868 Score: 2.0 R03G\_00460  
Query: 1 TTGATTTTGTGTAGTAGCA 20  
|||:||||\*||\*|  
Sbjct: 310 AACTGAAACAAAATCATCCT 291

>miR2868 Score: 2.5 R03G\_00896  
Query: 1 TTGATTTTGTGTAGTAGCA 20  
|||||\*||\*|\*  
Sbjct: 378 AACTAAAACAACGTAATAGA 359

>miR2868 Score: 2.0 R03G\_01611  
Query: 1 TTGATTTTGTGTAGTAGCA 20  
::|||\*|  
Sbjct: 2832 GGCTAAAACAACATTATT-T 2814

>miR2868 Score: 2.5 R03G\_01651  
Query: 1 TTGATTTTGTGTAGTAGCA 20  
|||||\*||\*|\*  
Sbjct: 258 AACTAAAACAACATTCTCAA 239

>miR2868 Score: 1.8 R03G\_01909  
Query: 1 TTGATTTTGTGTAGTAGCA 20  
:|||||\*|  
Sbjct: 814 GACTAAAACGACATCGTCGA 795

>miR2868 Score: 2.5 R03G\_01918  
Query: 1 TTGATTTTGTGTAGTAGCA 20  
\*||||\*||\*|\*  
Sbjct: 961 TACTAAAACAACACCAT-GA 943

>miR2868 Score: 2.5 R03G\_02044

Query: 1 TTGATTTTGTGTAGTAGCA 20  
|||||||\*||\*||\*|  
Sbjct: 502 AACTAAAACAACCTTCTTC-T 484  
>miR5639-5p Score: 0.0 R03G\_16544  
Query: 1 TTGTTCCACGTGTCTAAGGC 20  
|||||||  
Sbjct: 582 AACAAGGTGCACAGATTCCG 563  
>miR5639-5p Score: 2.2 R03G\_15468  
Query: 1 TTGTTCCACGTGTCTAAGGC 20  
:||||||\*|||:|:|||||  
Sbjct: 1574 GACAAGGTACACGGGTTCCG 1555  
>miR5639-5p Score: 2.5 R03G\_07160  
Query: 1 TTGTTCCACGTGTCTAAGGC 20  
|\*|:|||||:||||||\*||  
Sbjct: 674 ATCGAGGTGTACAGATT-CG 656  
>miR2651 Score: 0.0 R03G\_16804  
Query: 1 TGTTGATTGATATGCTGATT 20  
|||||||  
Sbjct: 178 ACAACTAACTATACGACTAA 159  
>miR2651 Score: 2.5 R03G\_16681  
Query: 1 TGTTGATTGATATGCTGATT 20  
:::|||:|||||:|||||||:  
Sbjct: 161 GTGACTGACTATGCGACTAG 142  
>miR2651 Score: 0.5 R03G\_15002  
Query: 1 TGTTGATTGATATGCTGATT 20  
|||||||:|||||||  
Sbjct: 178 ACAACTAACTGTACGACTAA 159  
>miR2651 Score: 0.5 R03G\_15131  
Query: 1 TGTTGATTGATATGCTGATT 20  
|||||||:|||||||  
Sbjct: 178 ACAACTAACTGTACGACTAA 159  
>miR2651 Score: 2.5 R03G\_15178  
Query: 1 TGTTGATTGATATGCTGATT 20  
:|||||||:|\*|||:\*  
Sbjct: 1748 GCAACTAACTATGCAACTGC 1729  
>miR2651 Score: 2.5 R03G\_14116  
Query: 1 TGTTGATTGATATGCTGATT 20  
|:\*|||||||:|||||:  
Sbjct: 171 ATATCTAACTATGCGACTGG 152  
>miR2651 Score: 2.5 R03G\_13370  
Query: 1 TGTTGATTGATATGCTGATT 20  
\*|:||||\*|||||||  
Sbjct: 348 CTAGCTAAGTATACGACTAA 329  
>miR2651 Score: 0.5 R03G\_13439  
Query: 1 TGTTGATTGATATGCTGATT 20

|||||:|||||  
Sbjct: 178 ACAACTAACTGTACGACTAA 159  
>miR2651 Score: 2.5 R03G\_13655  
Query: 1 TGTTGATTGATATGCTGATT 20  
||||\*||||\*||||\*|  
Sbjct: 905 ACAACAAACTAAACGACTTA 886  
>miR2651 Score: 2.5 R03G\_12971  
Query: 1 TGTTGATTGATATGCTGATT 20  
|||||||\*|||\*||\*||  
Sbjct: 1130 ACAACTAACAATACAACCAA 1111  
>miR2651 Score: 2.0 R03G\_13112  
Query: 1 TGTTGATTGATATGCTGATT 20  
:|:|||||:||||:|\*  
Sbjct: 1637 GCGACTAACTATGCGACTGC 1618  
>miR2651 Score: 0.0 R03G\_13293  
Query: 1 TGTTGATTGATATGCTGATT 20  
|||||  
Sbjct: 178 ACAACTAACTATACGACTAA 159  
>miR2651 Score: 0.5 R03G\_12007  
Query: 1 TGTTGATTGATATGCTGATT 20  
|||||:|||||  
Sbjct: 178 ACAACTAACTGTACGACTAA 159  
>miR2651 Score: 0.5 R03G\_12536  
Query: 1 TGTTGATTGATATGCTGATT 20  
|||||:|||||  
Sbjct: 178 ACAACTAACTGTACGACTAA 159  
>miR2651 Score: 2.5 R03G\_12637  
Query: 1 TGTTGATTGATATGCTGATT 20  
|||||||\*||:||:|  
Sbjct: 518 ACAACTAACAATGCGGTAA 499  
>miR2651 Score: 1.5 R03G\_11598  
Query: 1 TGTTGATTGATATGCTGATT 20  
|||||||\*|||||||\*  
Sbjct: 1091 ACAACTAACTTTACGACTAC 1072  
>miR2651 Score: 0.5 R03G\_10715  
Query: 1 TGTTGATTGATATGCTGATT 20  
|||||:|||||  
Sbjct: 178 ACAACTAACTGTACGACTAA 159  
>miR2651 Score: 2.5 R03G\_09489  
Query: 1 TGTTGATTGATATGCTGATT 20  
|||||||\*|||\*||\*||  
Sbjct: 1088 ACAACTAACAATACAACCAA 1069  
>miR2651 Score: 0.5 R03G\_09718  
Query: 1 TGTTGATTGATATGCTGATT 20  
|||||:|||||



Sbjct: 178 ACAACTAACTGTACGACTAA 159  
>miR2651 Score: 0.5 R03G\_10177  
Query: 1 TGTTGATTGATATGCTGATT 20  
|||||||:|||||||

Sbjct: 178 ACAACTAACTGTACGACTAA 159  
>miR2651 Score: 2.5 R03G\_10225  
Query: 1 TGTTGATTGATATGCTGATT 20  
|||||||\*|||\*||\*||

Sbjct: 1088 ACAACTAACAATACAACCAA 1069  
>miR2651 Score: 0.5 R03G\_09044  
Query: 1 TGTTGATTGATATGCTGATT 20  
|||||||:|||||||

Sbjct: 40 ACAACTAACTGTACGACTAA 21  
>miR2651 Score: 2.0 R03G\_06877  
Query: 1 TGTTGATTGATATGCTGATT 20  
|||||||\*|||\*||\*

Sbjct: 1160 ACAACTAACTATTCGAC-AC 1142  
>miR2651 Score: 2.5 R03G\_07853  
Query: 1 TGTTGATTGATATGCTGATT 20  
|:|||||\*|||\*|||

Sbjct: 978 ATAATAAATATACTACTAA 959  
>miR2651 Score: 0.5 R03G\_04309  
Query: 1 TGTTGATTGATATGCTGATT 20  
|||||||:|||||||

Sbjct: 178 ACAACTAACTGTACGACTAA 159  
>miR2651 Score: 2.5 R03G\_02696  
Query: 1 TGTTGATTGATATGCTGATT 20  
|||||||\*|||\*||\*||

Sbjct: 572 ACAACTAACAATACAACCAA 553  
>miR2651 Score: 2.5 R03G\_03799  
Query: 1 TGTTGATTGATATGCTGATT 20  
|||||||\*|||\*||\*||

Sbjct: 1088 ACAACTAACAATACAACCAA 1069  
>miR2651 Score: 2.5 R03G\_03855  
Query: 1 TGTTGATTGATATGCTGATT 20  
|||||||\*||\*|||\*||

Sbjct: 311 ACAACTAAATAGACGAC-AA 293  
>miR2651 Score: 0.5 R03G\_03867  
Query: 1 TGTTGATTGATATGCTGATT 20  
|||||||:|||||||

Sbjct: 178 ACAACTAACTGTACGACTAA 159  
>miR2651 Score: 0.5 R03G\_01004  
Query: 1 TGTTGATTGATATGCTGATT 20  
|||||||:|||||||

Sbjct: 178 ACAACTAACTGTACGACTAA 159

>miR2651 Score: 0.5 R03G\_01475  
Query: 1 TGTTGATTGATATGCTGATT 20  
|||||||:|||||||  
Sbjct: 178 ACAACTAACTGTACGACTAA 159

>miR2651 Score: 2.5 R03G\_17129  
Query: 1 TGTTGATTGATATGCTGATT 20  
|||||:|:|\*||\*||  
Sbjct: 2093 ACAACTAGCTGTAAGACGAA 2074

>miR8011a-5p Score: 0.0 R03G\_13920  
Query: 1 TTGGGTTGAGCTTTCTTTTTTTC 23  
|||||||  
Sbjct: 5261 AACCCAACTCGAAAGAAAAAAAG 5239

>miR8011a-5p Score: 0.0 R03G\_09965  
Query: 1 TTGGGTTGAGCTTTCTTTTTTTC 23  
|||||||  
Sbjct: 5261 AACCCAACTCGAAAGAAAAAAAG 5239

>miR8011a-5p Score: 1.5 R03G\_08253  
Query: 1 TTGGGTTGAGCTTTCTTTTTTTC 23  
\*|||:|||||||\*  
Sbjct: 367 CACCTAACTCGAAAGAAAAAAAT 345

>miR8011a-5p Score: 0.0 R03G\_05619  
Query: 1 TTGGGTTGAGCTTTCTTTTTTTC 23  
|||||||  
Sbjct: 3404 AACCCAACTCGAAAGAAAAAAAG 3382

>miR8011a-5p Score: 0.0 R03G\_06427  
Query: 1 TTGGGTTGAGCTTTCTTTTTTTC 23  
|||||||  
Sbjct: 4853 AACCCAACTCGAAAGAAAAAAAG 4831

>miR8011a-5p Score: 0.0 R03G\_06428  
Query: 1 TTGGGTTGAGCTTTCTTTTTTTC 23  
|||||||  
Sbjct: 4355 AACCCAACTCGAAAGAAAAAAAG 4333

>miR8011a-5p Score: 0.0 R03G\_06442  
Query: 1 TTGGGTTGAGCTTTCTTTTTTTC 23  
|||||||  
Sbjct: 5918 AACCCAACTCGAAAGAAAAAAAG 5896

>miR8011a-5p Score: 0.0 R03G\_02691  
Query: 1 TTGGGTTGAGCTTTCTTTTTTTC 23  
|||||||  
Sbjct: 8750 AACCCAACTCGAAAGAAAAAAAG 8728

>miR8011a-5p Score: 0.0 R03G\_02959  
Query: 1 TTGGGTTGAGCTTTCTTTTTTTC 23  
|||||||  
Sbjct: 5101 AACCCAACTCGAAAGAAAAAAAG 5079

>miR8011a-5p Score: 0.0 R03G\_03547

Query: 1 TTGGGTTGAGCTTTCTTTTTTTC 23  
|||||  
Sbjct: 5261 AACCCAACCTCGAAAGAAAAAAG 5239  
>miR8011a-5p Score: 1.0 R03G\_04115  
Query: 1 TTGGGTTGAGCTTTCTTTTTTTC 23  
|||:|||||\*  
Sbjct: 2053 AACCTAACCTCGAAAGAAAAAAA 2031  
>miR8011a-5p Score: 0.5 R03G\_17404  
Query: 1 TTGGGTTGAGCTTTCTTTTTTTC 23  
|||||\*  
Sbjct: 1738 AACCCAACCTCGAAAGAAAAAAA 1716  
>miR1152 Score: 0.0 R03G\_13297  
Query: 1 TAAAAGGAGCGCGTCTTGAA 20  
|||||  
Sbjct: 738 ATTTTCCTCGCGCAGAACTT 719  
>miR1152 Score: 0.0 R03G\_10676  
Query: 1 TAAAAGGAGCGCGTCTTGAA 20  
|||||  
Sbjct: 4119 ATTTTCCTCGCGCAGAACTT 4100  
>miR1152 Score: 0.0 R03G\_09480  
Query: 1 TAAAAGGAGCGCGTCTTGAA 20  
|||||  
Sbjct: 4977 ATTTTCCTCGCGCAGAACTT 4958  
>miR854 Score: 2.5 R03G\_14229  
Query: 1 TGATGAGGATATTGAGAAGGG 21  
\*||\*|||||:|||||:  
Sbjct: 2660 CCTCCTCCTATAGCTCTTCTT 2640  
>miR854 Score: 2.5 R03G\_13317  
Query: 1 TGATGAGGATATTGAGAAGGG 21  
\*|||||:|||||\*|||\*  
Sbjct: 486 CTAATTCTATAACTCCTCCA 466  
>miR854 Score: 1.5 R03G\_11879  
Query: 1 TGATGAGGATATTGAGAAGGG 21  
|||:|||||:|||||\*|  
Sbjct: 2158 ACTATTCCTATAATTCTTCAC 2138  
>miR854 Score: 2.0 R03G\_03642  
Query: 1 TGATGAGGATATTGAGAAGGG 21  
::||:|:|||||:|  
Sbjct: 1195 GTTATTCTTATAACTCTTCTC 1175  
>miR3449-5p Score: 0.0 R03G\_17222  
Query: 1 TCCAATCGCTTTCGTCTGT 19  
|||||  
Sbjct: 575 AGGTTAGCGAAAGCAGACA 557  
>miR3449-5p Score: 0.0 R03G\_16719  
Query: 1 TCCAATCGCTTTCGTCTGT 19

|||||  
Sbjct: 383 AGGTTAGCGAAAGCAGACA 365  
>miR3449-5p Score: 0.0 R03G\_16727  
Query: 1 TCCAATCGCTTTCGTCTGT 19

|||||  
Sbjct: 383 AGGTTAGCGAAAGCAGACA 365  
>miR3449-5p Score: 2.5 R03G\_16465  
Query: 1 TCCAATCGCTTTCGTCTGT 19

|||||\*\*|||||\*|  
Sbjct: 2266 AGGTTATAGAAAGCAGAAA 2248  
>miR3449-5p Score: 0.0 R03G\_16550  
Query: 1 TCCAATCGCTTTCGTCTGT 19

|||||  
Sbjct: 494 AGGTTAGCGAAAGCAGACA 476  
>miR3449-5p Score: 0.0 R03G\_13919  
Query: 1 TCCAATCGCTTTCGTCTGT 19

|||||  
Sbjct: 575 AGGTTAGCGAAAGCAGACA 557  
>miR3449-5p Score: 0.0 R03G\_13743  
Query: 1 TCCAATCGCTTTCGTCTGT 19

|||||  
Sbjct: 383 AGGTTAGCGAAAGCAGACA 365  
>miR3449-5p Score: 0.0 R03G\_12678  
Query: 1 TCCAATCGCTTTCGTCTGT 19

|||||  
Sbjct: 575 AGGTTAGCGAAAGCAGACA 557  
>miR3449-5p Score: 1.0 R03G\_13064  
Query: 1 TCCAATCGCTTTCGTCTGT 19

|||||\*|||||  
Sbjct: 41 AGGTTAGCGAAAACAGACA 23  
>miR3449-5p Score: 0.0 R03G\_13286  
Query: 1 TCCAATCGCTTTCGTCTGT 19

|||||  
Sbjct: 575 AGGTTAGCGAAAGCAGACA 557  
>miR3449-5p Score: 0.2 R03G\_12166  
Query: 1 TCCAATCGCTTTCGTCTGT 19

:|||||  
Sbjct: 383 GGGTTAGCGAAAGCAGACA 365  
>miR3449-5p Score: 0.2 R03G\_12658  
Query: 1 TCCAATCGCTTTCGTCTGT 19

:|||||  
Sbjct: 383 GGGTTAGCGAAAGCAGACA 365  
>miR3449-5p Score: 1.0 R03G\_11281  
Query: 1 TCCAATCGCTTTCGTCTGT 19

|||||\*|||||

Sbjct: 338 AGGTTAACGAAAGCAGACA 320  
>miR3449-5p Score: 2.0 R03G\_11807  
Query: 1 TCCAATCGCTTTCGTCTGT 19  
||\*||||||||||||\*|||  
Sbjct: 2510 AGTTTAGCGAAAGCATACA 2492  
>miR3449-5p Score: 0.0 R03G\_10550  
Query: 1 TCCAATCGCTTTCGTCTGT 19  
|||||||||||||||||  
Sbjct: 383 AGGTTAGCGAAAGCAGACA 365  
>miR3449-5p Score: 0.0 R03G\_10741  
Query: 1 TCCAATCGCTTTCGTCTGT 19  
|||||||||||||||||  
Sbjct: 383 AGGTTAGCGAAAGCAGACA 365  
>miR3449-5p Score: 0.0 R03G\_10763  
Query: 1 TCCAATCGCTTTCGTCTGT 19  
|||||||||||||||||  
Sbjct: 383 AGGTTAGCGAAAGCAGACA 365  
>miR3449-5p Score: 0.0 R03G\_10769  
Query: 1 TCCAATCGCTTTCGTCTGT 19  
|||||||||||||||||  
Sbjct: 260 AGGTTAGCGAAAGCAGACA 242  
>miR3449-5p Score: 0.2 R03G\_10787  
Query: 1 TCCAATCGCTTTCGTCTGT 19  
:|||||||||||||||||  
Sbjct: 383 GGGTTAGCGAAAGCAGACA 365  
>miR3449-5p Score: 1.8 R03G\_10056  
Query: 1 TCCAATCGCTTTCGTCTGT 19  
|||||||\*|:|||||||:  
Sbjct: 2220 AGGTTAGCTAGAGCAGACG 2202  
>miR3449-5p Score: 2.5 R03G\_08529  
Query: 1 TCCAATCGCTTTCGTCTGT 19  
|||||||\*||:||:||:||  
Sbjct: 793 AGGTTAGAGAGAGTAGGCA 775  
>miR3449-5p Score: 0.0 R03G\_08847  
Query: 1 TCCAATCGCTTTCGTCTGT 19  
|||||||||||||||||  
Sbjct: 383 AGGTTAGCGAAAGCAGACA 365  
>miR3449-5p Score: 2.2 R03G\_08994  
Query: 1 TCCAATCGCTTTCGTCTGT 19  
|\*\*|||||||||||||:  
Sbjct: 85 AATTTAGCGAAAGCAGACG 67  
>miR3449-5p Score: 0.0 R03G\_07690  
Query: 1 TCCAATCGCTTTCGTCTGT 19  
|||||||||||||||||  
Sbjct: 383 AGGTTAGCGAAAGCAGACA 365

>miR3449-5p Score: 0.0 R03G\_07707  
Query: 1 TCCAATCGCTTTCGTCTGT 19  
|||||  
Sbjct: 575 AGGTTAGCGAAAGCAGACA 557  
>miR3449-5p Score: 2.5 R03G\_04768  
Query: 1 TCCAATCGCTTTCGTCTGT 19  
\*|||||:|:|\*|  
Sbjct: 163 CGGTTAGCGAGAGTAGG-A 146  
>miR3449-5p Score: 2.5 R03G\_04776  
Query: 1 TCCAATCGCTTTCGTCTGT 19  
|||||\*||||:|\*|||  
Sbjct: 144 AGGTTAGAGAAAGTAAACA 126  
>miR3449-5p Score: 0.0 R03G\_02706  
Query: 1 TCCAATCGCTTTCGTCTGT 19  
|||||  
Sbjct: 575 AGGTTAGCGAAAGCAGACA 557  
>miR3449-5p Score: 0.0 R03G\_02845  
Query: 1 TCCAATCGCTTTCGTCTGT 19  
|||||  
Sbjct: 608 AGGTTAGCGAAAGCAGACA 590  
>miR3449-5p Score: 2.5 R03G\_03261  
Query: 1 TCCAATCGCTTTCGTCTGT 19  
|||||\*|||||\*|\*|  
Sbjct: 1343 AGGTTACCGAAAGCACAA-A 1326  
>miR3449-5p Score: 1.0 R03G\_03588  
Query: 1 TCCAATCGCTTTCGTCTGT 19  
|||||\*|||||\*|||  
Sbjct: 260 AGGTTAGCGAAAGCATACA 242  
>miR3449-5p Score: 1.0 R03G\_03602  
Query: 1 TCCAATCGCTTTCGTCTGT 19  
|||||\*|||||\*|||  
Sbjct: 524 AGGTTAGCGAAAGCATACA 506  
>miR3449-5p Score: 0.0 R03G\_03624  
Query: 1 TCCAATCGCTTTCGTCTGT 19  
|||||  
Sbjct: 383 AGGTTAGCGAAAGCAGACA 365  
>miR3449-5p Score: 2.5 R03G\_04064  
Query: 1 TCCAATCGCTTTCGTCTGT 19  
|||||\*||||:|\*|||  
Sbjct: 813 AGGTTAGCTAAAGTAG-CA 796  
>miR3449-5p Score: 2.5 R03G\_00079  
Query: 1 TCCAATCGCTTTCGTCTGT 19  
|||||:|\*||\*|||||  
Sbjct: 1135 AGGTTAGTGATAGGAGACA 1117  
>miR3449-5p Score: 2.5 R03G\_00099



```
|||||:|:|
Sbjct: 221 AAAGAATTTACGTTTAAGAAG 200
>miR1435a Score: 0.8 R03G_12006
Query: 1 TTTCTTAAAGTGCAAGTTTTTC 22
|||||:|:|
Sbjct: 221 AAAGAATTTACGTTTAAGAAG 200
>miR1435a Score: 0.0 R03G_11285
Query: 1 TTTCTTAAAGTGCAAGTTTTTC 22
|||||
Sbjct: 221 AAAGAATTTACGTTCAAAAAG 200
>miR1435a Score: 2.5 R03G_11681
Query: 1 TTTCTTAAAGTGCAAGTTTTTC 22
*|||*|||||*|||
Sbjct: 1201 CAAGTATTTACGTTCACTAAG 1180
>miR1435a Score: 0.8 R03G_01196
Query: 1 TTTCTTAAAGTGCAAGTTTTTC 22
|||||:|:|
Sbjct: 221 AAAGAATTTACGTTTAAGAAG 200
>miR1435a Score: 0.8 R03G_17365
Query: 1 TTTCTTAAAGTGCAAGTTTTTC 22
|||||:|:|
Sbjct: 221 AAAGAATTTACGTTTAAGAAG 200
>miR6023 Score: 2.0 R03G_17214
Query: 1 TTGATGACAGTTTTTTGGAT 20
||||:||||*||||*||
Sbjct: 116 AACTATTGTCACAAAAC-TA 98
>miR6023 Score: 2.0 R03G_16689
Query: 1 TTGATGACAGTTTTTTGGAT 20
||||:||||*||||*||
Sbjct: 116 AACTATTGTCACAAAAC-TA 98
>miR6023 Score: 2.0 R03G_15664
Query: 1 TTGATGACAGTTTTTTGGAT 20
||||:||||*||||*||
Sbjct: 116 AACTATTGTCACAAAAC-TA 98
>miR6023 Score: 2.5 R03G_15800
Query: 1 TTGATGACAGTTTTTTGGAT 20
|:|*||||:|||||
Sbjct: 1541 AGTTAGTGTGAGAAAACCTA 1522
>miR6023 Score: 2.5 R03G_15540
Query: 1 TTGATGACAGTTTTTTGGAT 20
|:||||*||:||||*||
Sbjct: 1385 AGCTACTGGCAGAAAAC-TA 1367
>miR6023 Score: 2.0 R03G_14568
Query: 1 TTGATGACAGTTTTTTGGAT 20
||||:||||*||||*||
```



Sbjct: 116 AACTATTGTCACAAAAC-TA 98  
>miR6023 Score: 2.5 R03G\_13835  
Query: 1 TTGATGACAGTTTTTTGGAT 20  
:||||:||||:||||:||||:|  
Sbjct: 10250 GACTGTTGTAAAGAACTTA 10231  
>miR6023 Score: 2.5 R03G\_13075  
Query: 1 TTGATGACAGTTTTTTGGA-T 20  
||||||\*||||:||||\*|\*|  
Sbjct: 696 AACTACTTTCAAGAAACATCA 676  
>miR6023 Score: 2.0 R03G\_10773  
Query: 1 TTGATGACAGTTTTTTGGAT 20  
|||||:||||\*||||\*||  
Sbjct: 116 AACTATTGTCACAAAAC-TA 98  
>miR6023 Score: 2.0 R03G\_10798  
Query: 1 TTGATGACAGTTTTTTGGAT 20  
|||||:||||\*||||\*||  
Sbjct: 116 AACTATTGTCACAAAAC-TA 98  
>miR6023 Score: 2.5 R03G\_10881  
Query: 1 TTGATGACAGTTTTTTGGAT 20  
|||||||:|\*|||||:|\*||  
Sbjct: 238 AACTACTGTTTAAAAAT-TA 220  
>miR6023 Score: 2.5 R03G\_09261  
Query: 1 TTGATGACAGTTTTTTGGAT 20  
\*\*||||\*|||||||  
Sbjct: 72 CTCTACTTTCAAAAACCTA 53  
>miR6023 Score: 2.0 R03G\_09542  
Query: 1 TTGATGACAGTTTTTTGGAT 20  
|||||:||||\*||||\*||  
Sbjct: 116 AACTATTGTCACAAAAC-TA 98  
>miR6023 Score: 2.5 R03G\_08626  
Query: 1 TTGATGACAGTTTTTTGGAT 20  
|||||\*|||||||:|\*\*|  
Sbjct: 1601 AACTACAGTCAAAGAC-AA 1583  
>miR6023 Score: 2.5 R03G\_08783  
Query: 1 TTGATGACAGTTTTTTGGAT 20  
:|||\*||||:||:||||:|  
Sbjct: 244 GACTCCTGTTAAGAACTTA 225  
>miR6023 Score: 2.0 R03G\_07030  
Query: 1 TTGATGACAGTTTTTTGGAT 20  
|||||:||||\*||||\*||  
Sbjct: 116 AACTATTGTCACAAAAC-TA 98  
>miR6023 Score: 2.0 R03G\_07038  
Query: 1 TTGATGACAGTTTTTTGGAT 20  
|||||:||||\*||||\*||  
Sbjct: 116 AACTATTGTCACAAAAC-TA 98



Query: 1 TAAAGATGGGAAGATGAAGAA 21  
\*|||||||:|||||:||||\*\*  
Sbjct: 437 CTTTCTACTCTTCTGCTTCGA 417  
>miR7492n Score: 2.5 R03G\_17204  
Query: 1 TAAGATCAGGGCTTTGAGCTGG 22  
|\*|:||||||:||||||\*||  
Sbjct: 700 AGTTTAGTCCTGAAACTCGTCC 679  
>miR7492n Score: 0.5 R03G\_17211  
Query: 1 TAAGATCAGGGCTTTGAGCTGG 22  
|||||||:|||||||  
Sbjct: 820 ATTCTAGTCCTGAAACTCGACC 799  
>miR7492n Score: 0.5 R03G\_17213  
Query: 1 TAAGATCAGGGCTTTGAGCTGG 22  
|||||||:|||||||  
Sbjct: 145 ATTCTAGTCCTGAAACTCGACC 124  
>miR7492n Score: 2.0 R03G\_16893  
Query: 1 TAAGATCAGGGCTTTGAGCTGG 22  
|\*|:|||||||\*||  
Sbjct: 262 AGTTTAGTCCCGAAACTCGTCC 241  
>miR7492n Score: 2.0 R03G\_16377  
Query: 1 TAAGATCAGGGCTTTGAGCTGG 22  
||||\*|||:|||||||  
Sbjct: 145 ATTCCAGTCTTGAAACTCGACC 124  
>miR7492n Score: 1.5 R03G\_16548  
Query: 1 TAAGATCAGGGCTTTGAGCTGG 22  
||||\*|||:|||||||  
Sbjct: 475 ATTCCAGTCCTGAAACTCGACC 454  
>miR7492n Score: 0.5 R03G\_16118  
Query: 1 TAAGATCAGGGCTTTGAGCTGG 22  
|||||||:|||||||  
Sbjct: 88 ATTCTAGTCCTGAAACTCGACC 67  
>miR7492n Score: 2.5 R03G\_15672  
Query: 1 TAAGATCAGGGCTTTGAGCTGG 22  
|\*|:||||||:||||||\*||  
Sbjct: 637 AGTTTAGTCCTGAAACTCGTCC 616  
>miR7492n Score: 0.5 R03G\_15873  
Query: 1 TAAGATCAGGGCTTTGAGCTGG 22  
|||||||:|||||||  
Sbjct: 820 ATTCTAGTCCTGAAACTCGACC 799  
>miR7492n Score: 2.0 R03G\_15496  
Query: 1 TAAGATCAGGGCTTTGAGCTGG 22  
|\*|:|||||||\*||  
Sbjct: 519 AGTTTAGTCCCGAAACTCGTCC 498  
>miR7492n Score: 2.5 R03G\_14987  
Query: 1 TAAGATCAGGGCTTTGAGCTGG 22

|\*|:|||||:||||||\*||  
Sbjct: 484 AGTTTAGTCCTGAAACTCGTCC 463  
>miR7492n Score: 0.5 R03G\_15154  
Query: 1 TAAGATCAGGGCTTTGAGCTGG 22  
|||||||:|||||||  
Sbjct: 820 ATTCTAGTCCTGAAACTCGACC 799  
>miR7492n Score: 2.2 R03G\_14596  
Query: 1 TAAGATCAGGGCTTTGAGCTGG 22  
|\*|:||||||\*|:  
Sbjct: 25 AGTTTAGTCCCGAAACTCGTCT 4  
>miR7492n Score: 2.5 R03G\_14620  
Query: 1 TAAGATCAGGGCTTTGAGCTGG 22  
|\*|:|||||:||||||\*||  
Sbjct: 265 AGTTTAGTCCTGAAACTCGTCC 244  
>miR7492n Score: 2.0 R03G\_14722  
Query: 1 TAAGATCAGGGCTTTGAGCTGG 22  
|\*|:||||||\*|:  
Sbjct: 877 AGTTTAGTCCCGAAACTCGTCC 856  
>miR7492n Score: 2.5 R03G\_14772  
Query: 1 TAAGATCAGGGCTTTGAGCTGG 22  
|\*|:|||||:||||||\*||  
Sbjct: 715 AGTTTAGTCCTGAAACTCGTCC 694  
>miR7492n Score: 2.0 R03G\_13903  
Query: 1 TAAGATCAGGGCTTTGAGCTGG 22  
|\*|:||||||\*|:  
Sbjct: 877 AGTTTAGTCCCGAAACTCGTCC 856  
>miR7492n Score: 0.5 R03G\_13447  
Query: 1 TAAGATCAGGGCTTTGAGCTGG 22  
|||||||:|||||||  
Sbjct: 820 ATTCTAGTCCTGAAACTCGACC 799  
>miR7492n Score: 2.0 R03G\_13664  
Query: 1 TAAGATCAGGGCTTTGAGCTGG 22  
|\*|:||||||\*|:  
Sbjct: 877 AGTTTAGTCCCGAAACTCGTCC 856  
>miR7492n Score: 2.0 R03G\_13672  
Query: 1 TAAGATCAGGGCTTTGAGCTGG 22  
|\*|:||||||\*|:  
Sbjct: 877 AGTTTAGTCCCGAAACTCGTCC 856  
>miR7492n Score: 0.5 R03G\_13706  
Query: 1 TAAGATCAGGGCTTTGAGCTGG 22  
|||||||:|||||||  
Sbjct: 778 ATTCTAGTCCTGAAACTCGACC 757  
>miR7492n Score: 2.5 R03G\_12670  
Query: 1 TAAGATCAGGGCTTTGAGCTGG 22  
|\*|:|||||:||||||\*||

Sbjct: 637 AGTTTAGTCCTGAAACTCGTCC 616  
>miR7492n Score: 2.0 R03G\_13276  
Query: 1 TAAGATCAGGGCTTTGAGCTGG 22  
|\*|:|||||:|||||||

Sbjct: 202 AGTTTAGTCCTGAAACTCGACC 181  
>miR7492n Score: 0.5 R03G\_12013  
Query: 1 TAAGATCAGGGCTTTGAGCTGG 22  
|||||||:|||||||

Sbjct: 145 ATTCTAGTCCTGAAACTCGACC 124  
>miR7492n Score: 2.5 R03G\_12082  
Query: 1 TAAGATCAGGGCTTTGAGCTGG 22  
|\*|:|||||:||||||\*||

Sbjct: 715 AGTTTAGTCCTGAAACTCGTCC 694  
>miR7492n Score: 2.0 R03G\_12139  
Query: 1 TAAGATCAGGGCTTTGAGCTGG 22  
|\*|:|||||||\*||

Sbjct: 250 AGTTTAGTCCCGAAACTCGTCC 229  
>miR7492n Score: 0.5 R03G\_12174  
Query: 1 TAAGATCAGGGCTTTGAGCTGG 22  
|||||||:|||||||

Sbjct: 145 ATTCTAGTCCTGAAACTCGACC 124  
>miR7492n Score: 0.5 R03G\_12526  
Query: 1 TAAGATCAGGGCTTTGAGCTGG 22  
|||||||:|||||||

Sbjct: 820 ATTCTAGTCCTGAAACTCGACC 799  
>miR7492n Score: 0.5 R03G\_11244  
Query: 1 TAAGATCAGGGCTTTGAGCTGG 22  
|||||||:|||||||

Sbjct: 820 ATTCTAGTCCTGAAACTCGACC 799  
>miR7492n Score: 0.5 R03G\_11263  
Query: 1 TAAGATCAGGGCTTTGAGCTGG 22  
|||||||:|||||||

Sbjct: 145 ATTCTAGTCCTGAAACTCGACC 124  
>miR7492n Score: 2.0 R03G\_11402  
Query: 1 TAAGATCAGGGCTTTGAGCTGG 22  
|\*|\*|||||||\*|||

Sbjct: 445 ACTCTAGTCCCGAAACACGACC 424  
>miR7492n Score: 2.5 R03G\_11405  
Query: 1 TAAGATCAGGGCTTTGAGCTGG 22  
|\*|:|||||:||||||\*||

Sbjct: 637 AGTTTAGTCCTGAAACTCGTCC 616  
>miR7492n Score: 2.0 R03G\_11486  
Query: 1 TAAGATCAGGGCTTTGAGCTGG 22  
|\*|:|||||||\*||

Sbjct: 586 AGTTTAGTCCCGAAACTCGTCC 565

>miR7492n Score: 1.5 R03G\_11528  
Query: 1 TAAGATCAGGGCTTTGAGCTGG 22  
||||\*|||||:|||||||  
Sbjct: 145 ATTCCAGTCCTGAAACTCGACC 124

>miR7492n Score: 0.0 R03G\_11534  
Query: 1 TAAGATCAGGGCTTTGAGCTGG 22  
|||||||:|||||||  
Sbjct: 820 ATTCTAGTCCCGAAACTCGACC 799

>miR7492n Score: 2.0 R03G\_11567  
Query: 1 TAAGATCAGGGCTTTGAGCTGG 22  
|\*|:|||||||\*||  
Sbjct: 1534 AGTTTAGTCCCGAAACTCGTCC 1513

>miR7492n Score: 2.2 R03G\_11827  
Query: 1 TAAGATCAGGGCTTTGAGCTGG 22  
|\*|:|||||||\*|:  
Sbjct: 64 AGTTTAGTCCCGAAACTC-ATC 44

>miR7492n Score: 1.5 R03G\_11948  
Query: 1 TAAGATCAGGGCTTTGAGCTGG 22  
||||\*|||||:|||||||  
Sbjct: 820 ATTCCAGTCCTGAAACTCGACC 799

>miR7492n Score: 0.5 R03G\_10528  
Query: 1 TAAGATCAGGGCTTTGAGCTGG 22  
|||||||:|||||||  
Sbjct: 145 ATTCTAGTCCTGAAACTCGACC 124

>miR7492n Score: 1.5 R03G\_10537  
Query: 1 TAAGATCAGGGCTTTGAGCTGG 22  
||||\*|||||:|||||||  
Sbjct: 643 ATTCCAGTCCTGAAACTCGACC 622

>miR7492n Score: 2.0 R03G\_10644  
Query: 1 TAAGATCAGGGCTTTGAGCTGG 22  
|\*|:|||||||\*||  
Sbjct: 262 AGTTTAGTCCCGAAACTCGTCC 241

>miR7492n Score: 0.5 R03G\_10720  
Query: 1 TAAGATCAGGGCTTTGAGCTGG 22  
|||||||:|||||||  
Sbjct: 820 ATTCTAGTCCTGAAACTCGACC 799

>miR7492n Score: 0.5 R03G\_10742  
Query: 1 TAAGATCAGGGCTTTGAGCTGG 22  
|||||||:|||||||  
Sbjct: 145 ATTCTAGTCCTGAAACTCGACC 124

>miR7492n Score: 1.5 R03G\_09199  
Query: 1 TAAGATCAGGGCTTTGAGCTGG 22  
||||\*|||||:|||||||  
Sbjct: 820 ATTCCAGTCCTGAAACTCGACC 799

>miR7492n Score: 2.2 R03G\_09279

Query: 1 TAAGATCAGGGCTTTGAGCTGG 22  
|\*|:|||||\*|:  
Sbjct: 412 AGTTTAGTCCCGAAACTCGTCT 391  
>miR7492n Score: 1.5 R03G\_09924  
Query: 1 TAAGATCAGGGCTTTGAGCTGG 22  
||||\*||||:|||||  
Sbjct: 820 ATTCCAGTCCTGAAACTCGACC 799  
>miR7492n Score: 2.5 R03G\_09944  
Query: 1 TAAGATCAGGGCTTTGAGCTGG 22  
|\*|:|||||:|||||\*||  
Sbjct: 637 AGTTTAGTCCTGAAACTCGTCC 616  
>miR7492n Score: 2.0 R03G\_09997  
Query: 1 TAAGATCAGGGCTTTGAGCTGG 22  
|||:|||||:|||||\*||:|  
Sbjct: 1078 ATTTTAGTCCTGAAACTAGATT 1057  
>miR7492n Score: 0.5 R03G\_10044  
Query: 1 TAAGATCAGGGCTTTGAGCTGG 22  
|||||:|||||  
Sbjct: 820 ATTCTAGTCCTGAAACTCGACC 799  
>miR7492n Score: 2.5 R03G\_10224  
Query: 1 TAAGATCAGGGCTTTGAGCTGG 22  
|\*|:|||||:|||||\*||  
Sbjct: 637 AGTTTAGTCCTGAAACTCGTCC 616  
>miR7492n Score: 2.5 R03G\_10226  
Query: 1 TAAGATCAGGGCTTTGAGCTGG 22  
|\*|:|||||:|||||\*||  
Sbjct: 637 AGTTTAGTCCTGAAACTCGTCC 616  
>miR7492n Score: 0.5 R03G\_07994  
Query: 1 TAAGATCAGGGCTTTGAGCTGG 22  
|||||:|||||  
Sbjct: 820 ATTCTAGTCCTGAAACTCGACC 799  
>miR7492n Score: 2.5 R03G\_08649  
Query: 1 TAAGATCAGGGCTTTGAGCTGG 22  
|\*|:|||||:|||||\*||  
Sbjct: 582 AGTTTAGTCCTGAAACTCGTCC 561  
>miR7492n Score: 2.0 R03G\_08835  
Query: 1 TAAGATCAGGGCTTTGAGCTGG 22  
\*|||\*||||:|||||  
Sbjct: 130 CTTCCAGTCCTGAAACTCGACC 109  
>miR7492n Score: 0.0 R03G\_08848  
Query: 1 TAAGATCAGGGCTTTGAGCTGG 22  
|||||:|||||  
Sbjct: 130 ATTCTAGTCCCGAAACTCGACC 109  
>miR7492n Score: 2.0 R03G\_08906  
Query: 1 TAAGATCAGGGCTTTGAGCTGG 22

|\*|:|||||\*||  
Sbjct: 877 AGTTTAGTCCCGAAACTCGTCC 856  
>miR7492n Score: 2.5 R03G\_09167  
Query: 1 TAAGATCAGGGCTTTGAGCTGG 22  
|\*|:|||||\*||  
Sbjct: 637 AGTTTAGTCCTGAAACTCGTCC 616  
>miR7492n Score: 0.5 R03G\_07119  
Query: 1 TAAGATCAGGGCTTTGAGCTGG 22  
|||||:|||||  
Sbjct: 145 ATTCTAGTCCTGAAACTCGACC 124  
>miR7492n Score: 1.5 R03G\_07295  
Query: 1 TAAGATCAGGGCTTTGAGCTGG 22  
||||\*||||:|||||  
Sbjct: 652 ATTCCAGTCCTGAAACTCGACC 631  
>miR7492n Score: 2.5 R03G\_07302  
Query: 1 TAAGATCAGGGCTTTGAGCTGG 22  
|\*|:|||||\*||  
Sbjct: 637 AGTTTAGTCCTGAAACTCGTCC 616  
>miR7492n Score: 0.5 R03G\_07683  
Query: 1 TAAGATCAGGGCTTTGAGCTGG 22  
|||||:|||||  
Sbjct: 820 ATTCTAGTCCTGAAACTCGACC 799  
>miR7492n Score: 2.5 R03G\_07689  
Query: 1 TAAGATCAGGGCTTTGAGCTGG 22  
|\*|:|||||\*||  
Sbjct: 637 AGTTTAGTCCTGAAACTCGTCC 616  
>miR7492n Score: 2.0 R03G\_07788  
Query: 1 TAAGATCAGGGCTTTGAGCTGG 22  
|\*|:|||||\*||  
Sbjct: 826 AGTTTAGTCCCGAAACTCGTCC 805  
>miR7492n Score: 2.0 R03G\_05535  
Query: 1 TAAGATCAGGGCTTTGAGCTGG 22  
|\*|:|||||\*||  
Sbjct: 262 AGTTTAGTCCCGAAACTCGTCC 241  
>miR7492n Score: 2.0 R03G\_05603  
Query: 1 TAAGATCAGGGCTTTGAGCTGG 22  
|\*|:|||||\*||  
Sbjct: 136 AGTTTAGTCCCGAAACTCGTCC 115  
>miR7492n Score: 2.0 R03G\_05616  
Query: 1 TAAGATCAGGGCTTTGAGCTGG 22  
|\*|:|||||\*||  
Sbjct: 166 AGTTTAGTCCCGAAACTCGTCC 145  
>miR7492n Score: 1.5 R03G\_05916  
Query: 1 TAAGATCAGGGCTTTGAGCTGG 22  
||||\*||||:|||||



Sbjct: 820 ATTCCAGTCCTGAAACTCGACC 799  
>miR7492n Score: 2.5 R03G\_06721  
Query: 1 TAAGATCAGGGCTTTGAGCTGG 22  
|\*|:|||||:||||||\*||

Sbjct: 634 AGTTTAGTCCTGAAACTCGTCC 613  
>miR7492n Score: 2.5 R03G\_04654  
Query: 1 TAAGATCAGGGCTTTGAGCTGG 22  
|\*|:|||||:||||||\*||

Sbjct: 637 AGTTTAGTCCTGAAACTCGTCC 616  
>miR7492n Score: 2.0 R03G\_05181  
Query: 1 TAAGATCAGGGCTTTGAGCTGG 22  
|\*|:|||||||:||||||\*||

Sbjct: 877 AGTTTAGTCCCGAAACTCGTCC 856  
>miR7492n Score: 2.0 R03G\_05194  
Query: 1 TAAGATCAGGGCTTTGAGCTGG 22  
|\*|:|||||||:||||||\*||

Sbjct: 877 AGTTTAGTCCCGAAACTCGTCC 856  
>miR7492n Score: 2.0 R03G\_05303  
Query: 1 TAAGATCAGGGCTTTGAGCTGG 22  
|\*|:|||||||:||||||\*||

Sbjct: 877 AGTTTAGTCCCGAAACTCGTCC 856  
>miR7492n Score: 2.0 R03G\_02354  
Query: 1 TAAGATCAGGGCTTTGAGCTGG 22  
|\*|:|||||||:||||||\*||

Sbjct: 877 AGTTTAGTCCCGAAACTCGTCC 856  
>miR7492n Score: 0.5 R03G\_03558  
Query: 1 TAAGATCAGGGCTTTGAGCTGG 22  
|||||||:|||||||

Sbjct: 820 ATTCTAGTCCTGAAACTCGACC 799  
>miR7492n Score: 1.5 R03G\_03617  
Query: 1 TAAGATCAGGGCTTTGAGCTGG 22  
||||\*||||:|||||||

Sbjct: 820 ATTCCAGTCCTGAAACTCGACC 799  
>miR7492n Score: 2.5 R03G\_03785  
Query: 1 TAAGATCAGGGCTTTGAGCTGG 22  
|\*|:|||||:||||||\*||

Sbjct: 442 AGTTTAGTCCTGAAACTCGTCC 421  
>miR7492n Score: 2.5 R03G\_03797  
Query: 1 TAAGATCAGGGCTTTGAGCTGG 22  
|\*|:|||||:||||||\*||

Sbjct: 325 AGTTTAGTCCTGAAACTCGTCC 304  
>miR7492n Score: 0.5 R03G\_03987  
Query: 1 TAAGATCAGGGCTTTGAGCTGG 22  
|||||||:|||||||

Sbjct: 820 ATTCTAGTCCTGAAACTCGACC 799

>miR7492n Score: 2.0 R03G\_04110  
Query: 1 TAAGATCAGGGCTTTGAGCTGG 22  
|\*|:|||||\*||  
Sbjct: 574 AGTTTAGTCCCGAAACTCGTCC 553

>miR7492n Score: 2.5 R03G\_04200  
Query: 1 TAAGATCAGGGCTTTGAGCTGG 22  
|\*|:|||||:|||||\*||  
Sbjct: 637 AGTTTAGTCCTGAAACTCGTCC 616

>miR7492n Score: 2.5 R03G\_00247  
Query: 1 TAAGATCAGGGCTTTGAGCTGG 22  
|\*|:|||||:|||||\*||  
Sbjct: 637 AGTTTAGTCCTGAAACTCGTCC 616

>miR7492n Score: 0.5 R03G\_01194  
Query: 1 TAAGATCAGGGCTTTGAGCTGG 22  
|||||:|||||  
Sbjct: 820 ATTCTAGTCCTGAAACTCGACC 799

>miR7492n Score: 0.5 R03G\_01313  
Query: 1 TAAGATCAGGGCTTTGAGCTGG 22  
|||||:|||||  
Sbjct: 820 ATTCTAGTCCTGAAACTCGACC 799

>miR7492n Score: 2.0 R03G\_01518  
Query: 1 TAAGATCAGGGCTTTGAGCTGG 22  
|\*|:|||||\*||  
Sbjct: 250 AATTTAGTCCCGAAACTCGTCC 229

>miR7492n Score: 2.0 R03G\_01528  
Query: 1 TAAGATCAGGGCTTTGAGCTGG 22  
|\*|:|||||\*||  
Sbjct: 445 AATTTAGTCCCGAAACTCGTCC 424

>miR7492n Score: 0.5 R03G\_01735  
Query: 1 TAAGATCAGGGCTTTGAGCTGG 22  
|||||:|||||  
Sbjct: 820 ATTCTAGTCCTGAAACTCGACC 799

>miR7492n Score: 2.0 R03G\_01923  
Query: 1 TAAGATCAGGGCTTTGAGCTGG 22  
|\*|:|||||\*||  
Sbjct: 826 AGTTTAGTCCCGAAACTCGTCC 805

>miR7492n Score: 1.5 R03G\_01950  
Query: 1 TAAGATCAGGGCTTTGAGCTGG 22  
|||\*|||||:|||||  
Sbjct: 820 ATTCCAGTCCTGAAACTCGACC 799

>miR7492n Score: 0.5 R03G\_01951  
Query: 1 TAAGATCAGGGCTTTGAGCTGG 22  
|||||:|||||  
Sbjct: 820 ATTCTAGTCCTGAAACTCGACC 799

>miR7492n Score: 2.5 R03G\_17436

Query: 1 TAAGATCAGGGCTTTGAGCTGG 22  
|\*|:|||||:||||||\*||  
Sbjct: 637 AGTTTAGTCCTGAAACTCGTCC 616  
>miR7492n Score: 0.5 R03G\_17409  
Query: 1 TAAGATCAGGGCTTTGAGCTGG 22  
|||||||:|||||||  
Sbjct: 820 ATTCTAGTCCTGAAACTCGACC 799  
>miR7492n Score: 2.5 R03G\_17293  
Query: 1 TAAGATCAGGGCTTTGAGCTGG 22  
|\*|:|||||:||||||\*||  
Sbjct: 637 AGTTTAGTCCTGAAACTCGTCC 616  
>miR319c Score: 2.5 R03G\_14171  
Query: 1 TTGGATGAAAGGGGCATGCT 20  
|:::|||||:|||||\*|  
Sbjct: 989 AGTTTACTTTCTCCGTACTA 970  
>miR319c Score: 2.5 R03G\_11493  
Query: 1 TTGGATGAAAGGGGCATGCT 20  
|||:|||||:|\*|  
Sbjct: 597 AACTTACTTTCTTCGTAACA 578  
>miR319c Score: 2.5 R03G\_11610  
Query: 1 TTGGATGAAAGGGGCATGCT 20  
\*||:|||||\*:\*:|||||  
Sbjct: 1755 CACTTACTTTCCGTGTACGA 1736  
>miR319c Score: 2.5 R03G\_08477  
Query: 1 TTGGATGAAAGGGGCATGCT 20  
:\*|||||:|:||||:|  
Sbjct: 954 GTCCTACTTTTCTCGTATGA 935  
>miR319c Score: 0.5 R03G\_04030  
Query: 1 TTGGATGAAAGGGGCATGCT 20  
|||||||:|||||||  
Sbjct: 1126 AACCTACTTTTCCCGTACGA 1107  
>miR1169-3p Score: 2.5 R03G\_14434  
Query: 1 TGTGGATGTTGCTTTCTGTGACC 23  
|||||\*|:||||||\*||\*|  
Sbjct: 1375 ACACCTTTAACGAAAGA-ACTTG 1354  
>miR1169-3p Score: 1.0 R03G\_13809  
Query: 1 TGTGGATGTTGCTTTCTGTGACC 23  
||||\*|||||||  
Sbjct: 81 ACACATACAACGAAAGACACTGG 59  
>miR1169-3p Score: 0.5 R03G\_13001  
Query: 1 TGTGGATGTTGCTTTCTGTGACC 23  
|||||||:|||||||  
Sbjct: 1603 ACACCTACAATGAAAGACACTGG 1581  
>miR1169-3p Score: 0.0 R03G\_11964  
Query: 1 TGTGGATGTTGCTTTCTGTGACC 23

|||||  
Sbjct: 47 ACACCTACAACGAAAGACACTGG 25  
>miR1169-3p Score: 2.5 R03G\_08182  
Query: 1 TGTGGATGTTGCTTTCTGTGACC 23  
|||:|:|:|||||\*||\*|  
Sbjct: 237 ACATCTGCGACGAAAGA-ACTAG 216  
>miR1169-3p Score: 2.0 R03G\_08215  
Query: 1 TGTGGATGTTGCTTTCTGTGACC 23  
|||:|:|:|||||\*||||  
Sbjct: 252 ACATCTGCGACGAAAGA-ACTGG 231  
>miR1169-3p Score: 2.5 R03G\_08368  
Query: 1 TGTGGATGTTGCTTTCTGTGACC 23  
|||:|:|:|||||\*||\*||  
Sbjct: 109 ACATCTGCGACGAAAGA-ACCGG 88  
>miR1169-3p Score: 0.5 R03G\_06596  
Query: 1 TGTGGATGTTGCTTTCTGTGACC 23  
|||||:|||||  
Sbjct: 1603 ACACCTACAATGAAAGACACTGG 1581  
>miR1169-3p Score: 0.5 R03G\_03002  
Query: 1 TGTGGATGTTGCTTTCTGTGACC 23  
|||||:|||||  
Sbjct: 1603 ACACCTACAATGAAAGACACTGG 1581  
>miR1169-3p Score: 1.0 R03G\_02146  
Query: 1 TGTGGATGTTGCTTTCTGTGACC 23  
|||||:|||||\*  
Sbjct: 24 ACACCTACAATGAAAGACACTGT 2  
>miR157a-5p Score: 2.5 R03G\_08552  
Query: 1 TTGACAGAAGATAGAGAGCA 20  
\*||||:|\*|:|||||  
Sbjct: 1183 CACTGTTTTGTGTCTCTCGT 1164  
>miR157a-5p Score: 2.5 R03G\_07943  
Query: 1 TTGACAGAAGATAGAGAGCA 20  
\*|||||\*|\*|:|||||\*|  
Sbjct: 434 CACTGTCTTCTACTTCTCCT 415  
>miR157a-5p Score: 2.5 R03G\_05159  
Query: 1 TTGACAGAAGATAGAGAGCA 20  
:|:|\*|||||:||:|  
Sbjct: 98 GATTATCTTCTATTTCTTGT 79  
>miR157a-5p Score: 2.5 R03G\_03092  
Query: 1 TTGACAGAAGATAGAGAGCA 20  
\*||||:|\*|:|||||  
Sbjct: 1183 CACTGTTTTGTGTCTCTCGT 1164  
>miR157a-5p Score: 2.0 R03G\_03674  
Query: 1 TTGACAGAAGATAGAGAGCA 20  
|||||\*||||:||||\*||

Sbjct: 375 AACTGTGTTCTGTCTCTAGT 356  
>miR1428e-3p Score: 0.0 R03G\_13882  
Query: 1 TAAGAAATGCCATGAACTCTTT 22  
|||||

Sbjct: 652 ATTCTTTACGGTACTTGAGAAA 631  
>miR1428e-3p Score: 0.0 R03G\_13730  
Query: 1 TAAGAAATGCCATGAACTCTTT 22  
|||||

Sbjct: 415 ATTCTTTACGGTACTTGAGAAA 394  
>miR1428e-3p Score: 0.0 R03G\_05325  
Query: 1 TAAGAAATGCCATGAACTCTTT 22  
|||||

Sbjct: 652 ATTCTTTACGGTACTTGAGAAA 631  
>miR1428e-3p Score: 1.0 R03G\_03721  
Query: 1 TAAGAAATGCCATGAACTCTTT 22  
|||||

Sbjct: 652 ATTCTTTACGGTACTTAAGAAA 631  
>miR1428e-3p Score: 1.5 R03G\_00141  
Query: 1 TAAGAAATGCCATGAACTCTTT 22  
|||||\*|||||

Sbjct: 652 ATTCTTTATGGTACTTAAGAAA 631  
>miR1428e-3p Score: 0.0 R03G\_00809  
Query: 1 TAAGAAATGCCATGAACTCTTT 22  
|||||:|||||\*|||||

Sbjct: 652 ATTCTTTACGGTACTTGAGAAA 631  
>miR1428e-3p Score: 2.5 R03G\_02044  
Query: 1 TAAGAAATGCCATGAACTCTTT 22  
:||:|\*|||||:|||||:

Sbjct: 1542 GTTTTTGACGGTATTTGAGAAG 1521  
>miR1850.1 Score: 2.0 R03G\_14387  
Query: 1 TTGAAAGTTTGGGAGTTGGGA 21  
|||||:||||\*|||:|

Sbjct: 1248 AACTTTCAGACCCTAAACTTT 1228  
>miR1850.1 Score: 0.5 R03G\_13985  
Query: 1 TTGAAAGTTTGGGAGTTGGGA 21  
\*|||||

Sbjct: 35 TACTTTCAAACCCTCAACCCT 15  
>miR1850.1 Score: 1.0 R03G\_10032  
Query: 1 TTGAAAGTTTGGGAGTTGGGA 21  
|\*|||||

Sbjct: 29 ACCTTTCAAACCCTCAACCCT 9  
>miR1850.1 Score: 2.5 R03G\_06362  
Query: 1 TTGAAAGTTTGGGAGTTG-GGA 21  
|:|||||:|||:|:|\*|||

Sbjct: 2173 AGCTTTCAGACCTTCGACACCT 2152

>miR835-3p Score: 2.5 R03G\_17089  
Query: 1 TGAAGAGATACGCCAGGAG 19  
||\*|||||\*||||:|  
Sbjct: 395 ACATCTCTAGGCGGTTCTC 377

>miR835-3p Score: 0.0 R03G\_14509  
Query: 1 TGAAGAGATACGCCAGGAG 19  
|||||||  
Sbjct: 856 ACTTCTCTATGCGGTCCTC 838

>miR835-3p Score: 2.5 R03G\_05548  
Query: 1 TGAAGAGATACGCCAGGAG 19  
\*|||||||\*||\*||  
Sbjct: 972 CCTTCTCTATGCTGTC-TC 955

>miR835-3p Score: 2.5 R03G\_06167  
Query: 1 TGAAGAGATACGCCAGGAG 19  
|:|\*||||||\*|||||  
Sbjct: 338 ATTACTCTATGCAGTCCTC 320

>miR7536a Score: 2.5 R03G\_07618  
Query: 1 TGAAGCATGCTCGAGACTG 19  
|||:|\*||\*||\*||  
Sbjct: 417 ACTTTGTATCAGCTCTG-C 400

>miR7536a Score: 2.0 R03G\_01272  
Query: 1 TGAAGCATGCTCGAGACTG 19  
:|||||:|\*|||:|  
Sbjct: 3269 GCTTCGTATGAGGTCTGGC 3251

>miR856-3p Score: 2.5 R03G\_16502  
Query: 1 TGAATGTGATTGTGGTTA-AA 20  
\*|||:|||||||:|\*|  
Sbjct: 326 CCTTATACTAACACCAGTAAT 306

>miR856-3p Score: 2.5 R03G\_09352  
Query: 1 TGAATGTGATTGTGGTTAAA 20  
\*|||:|||||||:|\*|  
Sbjct: 500 CCTTATACTAACACCAGTAA 481

>miR856-3p Score: 2.5 R03G\_09388  
Query: 1 TGAATGTGATTGTGGTTAAA 20  
||\*|||||||:||\*|  
Sbjct: 223 ACGTACACTAACATCAACAT 204

>miR856-3p Score: 2.5 R03G\_08586  
Query: 1 TGAATGTGATTGTGGTTAAA 20  
|||||||\*||\*||  
Sbjct: 225 ACTTACACTAACAAAAAATT 206

>miR856-3p Score: 2.5 R03G\_09191  
Query: 1 TGAATGTGATTGTGGTTAAA 20  
||\*|||\*||||||\*|  
Sbjct: 301 ACTGACACCAACACCAATAT 282

>miR6030 Score: 2.5 R03G\_02123

Query: 1 TCCACCCATACCATACAGACC 21  
\*|||||||:|\*|||  
Sbjct: 1728 TGGTGGGTATGGTGGGTATGG 1708  
>miR773a Score: 1.5 R03G\_16853  
Query: 1 TTTGCTGCCACTTTTGTCCAG 21  
|||||||\*|||\*  
Sbjct: 670 AAACGACGGTGAAAAC-GTGG 651  
>miR773a Score: 1.5 R03G\_16855  
Query: 1 TTTGCTGCCACTTTTGTCCAG 21  
|||||||\*|||\*  
Sbjct: 670 AAACGACGGTGAAAAC-GTGG 651  
>miR773a Score: 1.5 R03G\_16780  
Query: 1 TTTGCTGCCACTTTTGTCCAG 21  
|||||||\*|||\*  
Sbjct: 670 AAACGACGGTGAAAAC-GTGG 651  
>miR773a Score: 1.5 R03G\_16782  
Query: 1 TTTGCTGCCACTTTTGTCCAG 21  
|||||||\*|||\*  
Sbjct: 670 AAACGACGGTGAAAAC-GTGG 651  
>miR773a Score: 1.5 R03G\_16361  
Query: 1 TTTGCTGCCACTTTTGTCCAG 21  
|||||:|\*|||||||  
Sbjct: 920 AAACGGCGTTGAAAACAGTGC 900  
>miR773a Score: 1.5 R03G\_15904  
Query: 1 TTTGCTGCCACTTTTGTCCAG 21  
|||||||\*|||\*  
Sbjct: 604 AAACGACGGTGAAAAC-GTGG 585  
>miR773a Score: 2.0 R03G\_15475  
Query: 1 TTTGCTGCCACTTTTGTCCAG 21  
|||||||\*|||\*  
Sbjct: 487 AAACGACGGTGAAAAC-CTGG 468  
>miR773a Score: 2.0 R03G\_12985  
Query: 1 TTTGCTGCCACTTTTGTCCAG 21  
|||||||\*|||\*  
Sbjct: 667 AAACGACGGTGAAAAC-CTGG 648  
>miR773a Score: 2.0 R03G\_12986  
Query: 1 TTTGCTGCCACTTTTGTCCAG 21  
|||||||\*|||\*  
Sbjct: 667 AAACGACGGTGAAAAC-CTGG 648  
>miR773a Score: 2.0 R03G\_12228  
Query: 1 TTTGCTGCCACTTTTGTCCAG 21  
|||||||\*|||\*  
Sbjct: 667 AAACGACGGTGAAAAC-CTGG 648  
>miR773a Score: 2.0 R03G\_12229  
Query: 1 TTTGCTGCCACTTTTGTCCAG 21

|||||\*||\*  
Sbjct: 667 AAACGACGGTGAAAAC-CTGG 648  
>miR773a Score: 2.5 R03G\_08059  
Query: 1 TTTGCTGCCACTTTTGTACG 21  
\*|||||\*||\*|\*|  
Sbjct: 427 TAACGACGGTAAAAACACTTC 407  
>miR773a Score: 2.0 R03G\_06812  
Query: 1 TTTGCTGCCACTTTTGTACG 21  
|||||\*||\*  
Sbjct: 667 AAACGACGGTGAAAAC-CTGG 648  
>miR773a Score: 2.0 R03G\_06815  
Query: 1 TTTGCTGCCACTTTTGTACG 21  
|||||\*||\*  
Sbjct: 601 AAACGACGGTGAAAAC-CTGG 582  
>miR773a Score: 2.0 R03G\_07241  
Query: 1 TTTGCTGCCACTTTTGTACG 21  
|||||\*||\*  
Sbjct: 601 AAACGACGGTGAAAAC-CTGG 582  
>miR773a Score: 2.0 R03G\_07244  
Query: 1 TTTGCTGCCACTTTTGTACG 21  
|||||\*||\*  
Sbjct: 694 AAACGACGGTGAAAAC-CTGG 675  
>miR773a Score: 2.5 R03G\_04955  
Query: 1 TTTGCTGCCACTTTTGTCA-CG 21  
|||\*|||||:||\*|\*||  
Sbjct: 180 AAACCACGGTGAAGACACTAGC 159  
>miR773a Score: 2.5 R03G\_03107  
Query: 1 TTTGCTGCCACTTTTGTACG 21  
\*|||||\*||\*|\*|  
Sbjct: 2734 TAACGACGGTAAAAACACTTC 2714  
>miR773a Score: 0.0 R03G\_04126  
Query: 1 TTTGCTGCCACTTTTGTACG 21  
|||||  
Sbjct: 920 AAACGACGGTGAAAACAGTGC 900  
>miR773a Score: 2.0 R03G\_00573  
Query: 1 TTTGCTGCCACTTTTGTACG 21  
|||||\*||\*  
Sbjct: 439 AAACGACGGTGAAAAC-TTGG 420  
>miR773a Score: 1.5 R03G\_17422  
Query: 1 TTTGCTGCCACTTTTGTACG 21  
||||:|\*|||||  
Sbjct: 221 AAACGGCGTTGAAAACAGTGC 201  
>miR6264 Score: 2.5 R03G\_17159  
Query: 1 ATTCTTGGACCGTGTCAA 18  
|||||\*|||:|\*|||



Sbjct: 400 TAAGAACATGGTAAAGTT 383  
>miR6264 Score: 2.5 R03G\_15603  
Query: 1 ATTCTTGGACCGTGTCAA 18  
||:||||:||||:\*|||||  
Sbjct: 382 TAGGAACTTGGTTCAGTT 365  
>miR6264 Score: 2.5 R03G\_15562  
Query: 1 ATTCTTGGACCGTGTCAA 18  
||:||||\*|\*|||||||  
Sbjct: 603 TAGGAACCAGTCACAGTT 586  
>miR6264 Score: 2.0 R03G\_14386  
Query: 1 ATTCTTGGACCGTGTCAA 18  
\*|:||||\*|\*|||||||  
Sbjct: 303 GAGGAACCGGGCACAGTT 286  
>miR6264 Score: 2.5 R03G\_14331  
Query: 1 ATTCTTGGACCGTGTCAA 18  
\*|\*||||:||||\*|||\*  
Sbjct: 4680 AAAGAACTTGGCAAAGTA 4663  
>miR6264 Score: 2.5 R03G\_13789  
Query: 1 ATTCTTGGACCGTGTCAA 18  
\*:||:|\*|\*|||||||  
Sbjct: 1594 GGAGGAACTGGCACAGTT 1577  
>miR6264 Score: 2.5 R03G\_07205  
Query: 1 ATTCTTGGACCGTGTCAA 18  
\*|\*||\*|\*|||:||||\*  
Sbjct: 555 GAAGAACTGGTACAGTA 538  
>miR6264 Score: 2.5 R03G\_07582  
Query: 1 ATTCTTGGACCGTGTCAA 18  
\*|\*|||:|\*|:|||||  
Sbjct: 1429 GAAGAACTTAGTACAGTT 1412  
>miR6264 Score: 2.5 R03G\_04566  
Query: 1 ATTCTTGGACCGTGTCAA 18  
\*|\*||:||||:|||||  
Sbjct: 454 CACGAGCCTGGTACAGTT 437  
>miR6264 Score: 2.5 R03G\_04729  
Query: 1 ATTCTTGGACCGTGTCAA 18  
\*\*|\*||\*|\*|||||  
Sbjct: 972 GTAGAACCTAGCACAGTT 955  
>miR6264 Score: 2.5 R03G\_02698  
Query: 1 ATTCTTGGACCGTGTCAA 18  
||||\*|||:|\*|||  
Sbjct: 280 TAAGAACATGGTAAAGTT 263  
>miR6264 Score: 2.0 R03G\_03474  
Query: 1 ATTCTTGGACCGTGTCAA 18  
||||\*|||:||\*|\*  
Sbjct: 555 TAAGAACCTGGTACAATG 538

>miR6264 Score: 2.5 R03G\_00321  
Query: 1 ATTCTTGGACCGTGTCAA 18  
\*|||||\*||\*|||||  
Sbjct: 139 GAAGAACGTGACACAGTT 122

>miR9552b-3p Score: 2.5 R03G\_10258  
Query: 1 TGGCGAGAGACCGATAGC 18  
\*|||||:|:|:|:|  
Sbjct: 1399 CCCGCTTTTTGGTTGTTCG 1382

>miR9552b-3p Score: 2.5 R03G\_09074  
Query: 1 TGGCGAGAGACCGATAGC 18  
|||:|||||:|:|\*|  
Sbjct: 1074 ACCGTTCTCTGGTTGTGG 1057

>miR9552b-3p Score: 2.5 R03G\_09077  
Query: 1 TGGCGAGAGACCGATAGC 18  
|||:|||||:|:|\*|  
Sbjct: 1074 ACCGTTCTCTGGTTGTGG 1057

>miR9552b-3p Score: 2.5 R03G\_07084  
Query: 1 TGGCGAGAGACCGATAGC 18  
\*:||:||||||\*|||  
Sbjct: 165 TTCGTTCTCTGGCCATCG 148

>miR9552b-3p Score: 2.5 R03G\_02584  
Query: 1 TGGCGAGAGACCGATAGC 18  
\*:||:||||||\*|||  
Sbjct: 165 CTCGTTCTCTGGCCATCG 148

>miR9552b-3p Score: 2.0 R03G\_03948  
Query: 1 TGGCGAGAGACCGATAGC 18  
|:~\*|||||||  
Sbjct: 84 ATTACTCTCTGGCTATCG 67

>miR9552b-3p Score: 2.0 R03G\_01749  
Query: 1 TGGCGAGAGACCGATAGC 18  
\*:|||||||\*||  
Sbjct: 204 CTCGCTCTCTGGCTACCG 187

>miR8141 Score: 1.0 R03G\_16729  
Query: 1 TGCATACTAGTTGGTGGTGT 20  
|||||||\*|||||||  
Sbjct: 758 ACGTATGATGAACCACCACA 739

>miR8141 Score: 0.2 R03G\_14560  
Query: 1 TGCATACTAGTTGGTGGTGT 20  
|||||||:|  
Sbjct: 758 ACGTATGATCAACCACCACG 739

>miR8141 Score: 0.2 R03G\_13858  
Query: 1 TGCATACTAGTTGGTGGTGT 20  
|||||||:|  
Sbjct: 521 ACGTATGATCAACCACCACG 502

>miR8141 Score: 0.2 R03G\_12666

Query: 1 TGCATACTAGTTGGTGGTGT 20  
|||||||: |  
Sbjct: 521 ACGTATGATCAACCACCACG 502  
>miR8141 Score: 0.2 R03G\_12954  
Query: 1 TGCATACTAGTTGGTGGTGT 20  
|||||||: |  
Sbjct: 890 ACGTATGATCAACCACCACG 871  
>miR8141 Score: 0.2 R03G\_12071  
Query: 1 TGCATACTAGTTGGTGGTGT 20  
|||||||: |  
Sbjct: 521 ACGTATGATCAACCACCACG 502  
>miR8141 Score: 1.2 R03G\_08115  
Query: 1 TGCATACTAGTTGGTGGTGT 20  
|||||||\*|||||||: |  
Sbjct: 593 ACGTATGATGAACCACCACG 574  
>miR8141 Score: 2.2 R03G\_07774  
Query: 1 TGCATACTAGTTGGTGGTGT 20  
\*||||||: ||: ||: |||||: |  
Sbjct: 266 CCGTATGGTCGACTACCACG 247  
>miR8141 Score: 1.2 R03G\_04690  
Query: 1 TGCATACTAGTTGGTGGTGT 20  
|||||||\*|||||||: |  
Sbjct: 890 ACGTATGATGAACCACCACG 871  
>miR8141 Score: 0.2 R03G\_05421  
Query: 1 TGCATACTAGTTGGTGGTGT 20  
|||||||: |  
Sbjct: 560 ACGTATGATCAACCACCACG 541  
>miR8141 Score: 0.2 R03G\_05431  
Query: 1 TGCATACTAGTTGGTGGTGT 20  
|||||||: |  
Sbjct: 848 ACGTATGATCAACCACCACG 829  
>miR8141 Score: 1.2 R03G\_02713  
Query: 1 TGCATACTAGTTGGTGGTGT 20  
|||||||\*|||||||: |  
Sbjct: 620 ACGTATGATGAACCACCACG 601  
>miR8141 Score: 0.2 R03G\_03764  
Query: 1 TGCATACTAGTTGGTGGTGT 20  
|||||||: |  
Sbjct: 521 ACGTATGATCAACCACCACG 502  
>miR8141 Score: 0.2 R03G\_03776  
Query: 1 TGCATACTAGTTGGTGGTGT 20  
|||||||: |  
Sbjct: 350 ACGTATGATCAACCACCACG 331  
>miR902a-5p Score: 1.0 R03G\_15157  
Query: 1 TACTGCATGCACGCTTCTTCA 21

\*|||||||:|||||||  
Sbjct: 347 TTGACGTATGTGCGAAGAAGT 327  
>miR902a-5p Score: 1.0 R03G\_14637  
Query: 1 TACTGCATGCACGCTTCTTCA 21  
\*|||||||:|||||||  
Sbjct: 347 TTGACGTATGTGCGAAGAAGT 327  
>miR902a-5p Score: 0.5 R03G\_13735  
Query: 1 TACTGCATGCACGCTTCTTCA 21  
|||||||:|||||||  
Sbjct: 347 ATGACGTATGTGCGAAGAAGT 327  
>miR902a-5p Score: 0.2 R03G\_12957  
Query: 1 TACTGCATGCACGCTTCTTCA 21  
:|||||||  
Sbjct: 347 GTGACGTACGTGCGAAGAAGT 327  
>miR902a-5p Score: 1.0 R03G\_12005  
Query: 1 TACTGCATGCACGCTTCTTCA 21  
\*|||||||:|||||||  
Sbjct: 347 TTGACGTATGTGCGAAGAAGT 327  
>miR902a-5p Score: 0.5 R03G\_12179  
Query: 1 TACTGCATGCACGCTTCTTCA 21  
|||||||:|||||||  
Sbjct: 347 ATGACGTATGTGCGAAGAAGT 327  
>miR902a-5p Score: 0.5 R03G\_11953  
Query: 1 TACTGCATGCACGCTTCTTCA 21  
\*|||||||:|||||||  
Sbjct: 224 TTGACGTACGTGCGAAGAAGT 204  
>miR902a-5p Score: 0.5 R03G\_10525  
Query: 1 TACTGCATGCACGCTTCTTCA 21  
\*|||||||:|||||||  
Sbjct: 347 TTGACGTACGTGCGAAGAAGT 327  
>miR902a-5p Score: 0.5 R03G\_10531  
Query: 1 TACTGCATGCACGCTTCTTCA 21  
\*|||||||:|||||||  
Sbjct: 347 TTGACGTACGTGCGAAGAAGT 327  
>miR902a-5p Score: 0.5 R03G\_10545  
Query: 1 TACTGCATGCACGCTTCTTCA 21  
\*|||||||:|||||||  
Sbjct: 347 TTGACGTACGTGCGAAGAAGT 327  
>miR902a-5p Score: 0.5 R03G\_07110  
Query: 1 TACTGCATGCACGCTTCTTCA 21  
\*|||||||:|||||||  
Sbjct: 347 TTGACGTACGTGCGAAGAAGT 327  
>miR902a-5p Score: 0.5 R03G\_07676  
Query: 1 TACTGCATGCACGCTTCTTCA 21  
\*|||||||:|||||||

Sbjct: 347 TTGACGTACGTGCGAAGAAGT 327  
>miR902a-5p Score: 0.5 R03G\_07678  
Query: 1 TACTGCATGCACGCTTCTTCA 21  
\*|||||

Sbjct: 347 TTGACGTACGTGCGAAGAAGT 327  
>miR902a-5p Score: 0.5 R03G\_07868  
Query: 1 TACTGCATGCACGCTTCTTCA 21  
\*|||||

Sbjct: 347 TTGACGTACGTGCGAAGAAGT 327  
>miR902a-5p Score: 0.5 R03G\_05523  
Query: 1 TACTGCATGCACGCTTCTTCA 21  
\*|||||

Sbjct: 347 TTGACGTACGTGCGAAGAAGT 327  
>miR902a-5p Score: 1.0 R03G\_04676  
Query: 1 TACTGCATGCACGCTTCTTCA 21  
\*|||||:|||||

Sbjct: 347 TTGACGTATGTGCGAAGAAGT 327  
>miR902a-5p Score: 0.5 R03G\_03767  
Query: 1 TACTGCATGCACGCTTCTTCA 21  
\*|||||

Sbjct: 347 TTGACGTACGTGCGAAGAAGT 327  
>miR902a-5p Score: 0.5 R03G\_01949  
Query: 1 TACTGCATGCACGCTTCTTCA 21  
\*|||||

Sbjct: 347 TTGACGTACGTGCGAAGAAGT 327  
>miR902a-5p Score: 0.5 R03G\_01968  
Query: 1 TACTGCATGCACGCTTCTTCA 21  
\*|||||

Sbjct: 347 TTGACGTACGTGCGAAGAAGT 327  
>miR902a-5p Score: 0.5 R03G\_17380  
Query: 1 TACTGCATGCACGCTTCTTCA 21  
\*|||||

Sbjct: 347 TTGACGTACGTGCGAAGAAGT 327  
>miR774b-5p Score: 0.2 R03G\_16736  
Query: 1 TGAAGATGCATATTTGGAGTGAC 23  
|||||:||

Sbjct: 26 ACTTCTACGTATAAACCTCATTG 4  
>miR774b-5p Score: 0.0 R03G\_16138  
Query: 1 TGAAGATGCATATTTGGAGTGAC 23  
|||||

Sbjct: 1892 ACTTCTACGTATAAACCTCACTG 1870  
>miR774b-5p Score: 0.5 R03G\_15580  
Query: 1 TGAAGATGCATATTTGGAGTGA-C 23  
|||||\*|

Sbjct: 1856 ACTTCTACGTATAAACCTCACTAG 1833

>miR774b-5p Score: 0.0 R03G\_14626  
Query: 1 TGAAGATGCATATTTGGAGTGAC 23  
|||||  
Sbjct: 1892 ACTTCTACGTATAAACCTCACTG 1870

>miR774b-5p Score: 0.2 R03G\_14710  
Query: 1 TGAAGATGCATATTTGGAGTGAC 23  
|||||:|  
Sbjct: 1892 ACTTCTACGTATAAACCTCATTG 1870

>miR774b-5p Score: 0.2 R03G\_13747  
Query: 1 TGAAGATGCATATTTGGAGTGAC 23  
|||||:|  
Sbjct: 1892 ACTTCTACGTATAAACCTCATTG 1870

>miR774b-5p Score: 0.0 R03G\_13149  
Query: 1 TGAAGATGCATATTTGGAGTGAC 23  
|||||  
Sbjct: 89 ACTTCTACGTATAAACCTCACTG 67

>miR774b-5p Score: 0.2 R03G\_12009  
Query: 1 TGAAGATGCATATTTGGAGTGAC 23  
|||||:|  
Sbjct: 1892 ACTTCTACGTATAAACCTCATTG 1870

>miR774b-5p Score: 0.0 R03G\_12072  
Query: 1 TGAAGATGCATATTTGGAGTGAC 23  
|||||  
Sbjct: 1892 ACTTCTACGTATAAACCTCACTG 1870

>miR774b-5p Score: 0.2 R03G\_12169  
Query: 1 TGAAGATGCATATTTGGAGTGAC 23  
|||||:|  
Sbjct: 1892 ACTTCTACGTATAAACCTCATTG 1870

>miR774b-5p Score: 0.2 R03G\_11404  
Query: 1 TGAAGATGCATATTTGGAGTGAC 23  
|||||:|  
Sbjct: 1892 ACTTCTACGTATAAACCTCATTG 1870

>miR774b-5p Score: 0.5 R03G\_11531  
Query: 1 TGAAGATGCATATTTGGAGTGA-C 23  
|||||\*|  
Sbjct: 1385 ACTTCTACGTATAAACCTCACTAG 1362

>miR774b-5p Score: 0.2 R03G\_11771  
Query: 1 TGAAGATGCATATTTGGAGTGAC 23  
|||||:|  
Sbjct: 1892 ACTTCTACGTATAAACCTCATTG 1870

>miR774b-5p Score: 0.0 R03G\_10522  
Query: 1 TGAAGATGCATATTTGGAGTGAC 23  
|||||  
Sbjct: 1856 ACTTCTACGTATAAACCTCACTG 1834

>miR774b-5p Score: 0.2 R03G\_10725

Query: 1 TGAAGATGCATATTTGGAGTGAC 23  
|||||||:|  
Sbjct: 1856 ACTTCTACGTATAAACCTCATTG 1834  
>miR774b-5p Score: 0.2 R03G\_09940  
Query: 1 TGAAGATGCATATTTGGAGTGAC 23  
|||||||:|  
Sbjct: 1892 ACTTCTACGTATAAACCTCATTG 1870  
>miR774b-5p Score: 0.2 R03G\_07128  
Query: 1 TGAAGATGCATATTTGGAGTGAC 23  
|||||||:|  
Sbjct: 410 ACTTCTACGTATAAACCTCATTG 388  
>miR774b-5p Score: 0.0 R03G\_07294  
Query: 1 TGAAGATGCATATTTGGAGTGAC 23  
|||||||  
Sbjct: 1493 ACTTCTACGTATAAACCTCACTG 1471  
>miR774b-5p Score: 0.2 R03G\_07686  
Query: 1 TGAAGATGCATATTTGGAGTGAC 23  
|||||||:|  
Sbjct: 1892 ACTTCTACGTATAAACCTCATTG 1870  
>miR774b-5p Score: 0.2 R03G\_07976  
Query: 1 TGAAGATGCATATTTGGAGTGAC 23  
|||||||:|  
Sbjct: 1889 ACTTCTACGTATAAACCTCATTG 1867  
>miR774b-5p Score: 0.0 R03G\_05958  
Query: 1 TGAAGATGCATATTTGGAGTGAC 23  
|||||||  
Sbjct: 1856 ACTTCTACGTATAAACCTCACTG 1834  
>miR774b-5p Score: 0.8 R03G\_06430  
Query: 1 TGAAGATGCATATTTGGAGTGAC 23  
|||:|||||||:|  
Sbjct: 1856 ACTTTTACGTATAAACCTCATTG 1834  
>miR774b-5p Score: 0.0 R03G\_04785  
Query: 1 TGAAGATGCATATTTGGAGTGAC 23  
|||||||  
Sbjct: 1856 ACTTCTACGTATAAACCTCACTG 1834  
>miR774b-5p Score: 0.2 R03G\_03552  
Query: 1 TGAAGATGCATATTTGGAGTGAC 23  
|||||||:|  
Sbjct: 26 ACTTCTACGTATAAACCTCATTG 4  
>miR774b-5p Score: 0.5 R03G\_03580  
Query: 1 TGAAGATGCATATTTGGAGTGA-C 23  
|||||||\*|  
Sbjct: 1817 ACTTCTACGTATAAACCTCACTAG 1794  
>miR774b-5p Score: 0.5 R03G\_03589  
Query: 1 TGAAGATGCATATTTGGAGTGA-C 23

||||||||||||||||||||\*|  
Sbjct: 1817 ACTTCTACGTATAAACCTCACTAG 1794  
>miR774b-5p Score: 1.0 R03G\_01207  
Query: 1 TGAAGATGCATATTTGGAGTGAC 23  
||||:||||||||||||||||\*||  
Sbjct: 1709 ACTTTTACGTATAAACCTCA-TG 1688  
>miR774b-5p Score: 0.2 R03G\_01309  
Query: 1 TGAAGATGCATATTTGGAGTGAC 23  
||||||||||||||||||||:|  
Sbjct: 1841 ACTTCTACGTATAAACCTCATTG 1819  
>miR774b-5p Score: 0.0 R03G\_01740  
Query: 1 TGAAGATGCATATTTGGAGTGAC 23  
|||||||||||||||||||||  
Sbjct: 1856 ACTTCTACGTATAAACCTCACTG 1834  
>miR774b-5p Score: 0.0 R03G\_01954  
Query: 1 TGAAGATGCATATTTGGAGTGAC 23  
|||||||||||||||||||||  
Sbjct: 842 ACTTCTACGTATAAACCTCACTG 820  
>miR774b-5p Score: 0.0 R03G\_17441  
Query: 1 TGAAGATGCATATTTGGAGTGAC 23  
|||||||||||||||||||||  
Sbjct: 1619 ACTTCTACGTATAAACCTCACTG 1597  
>miR774b-5p Score: 0.2 R03G\_17385  
Query: 1 TGAAGATGCATATTTGGAGTGAC 23  
||||||||||||||||||||:|  
Sbjct: 1892 ACTTCTACGTATAAACCTCATTG 1870  
>miR774b-5p Score: 0.2 R03G\_17358  
Query: 1 TGAAGATGCATATTTGGAGTGAC 23  
||||||||||||||||||||:|  
Sbjct: 1892 ACTTCTACGTATAAACCTCATTG 1870  
>miR5741a Score: 2.5 R03G\_07788  
Query: 1 TAGGAGCAAATTGATGTGTTT 21  
|\*:|||||||||\*|||||  
Sbjct: 1540 ACTCTCGTTTAACTTCACAAA 1520  
>miR9653a-3p Score: 2.5 R03G\_17204  
Query: 1 TTGGGACTTTGGGCTGGCC 19  
|::|||||||:|\*|||  
Sbjct: 695 AGTCCTGAAACTCGTCCGG 677  
>miR9653a-3p Score: 1.5 R03G\_17211  
Query: 1 TTGGGACTTTGGGCTGGCC 19  
|::|||||||:|||||  
Sbjct: 815 AGTCCTGAAACTCGACCGG 797  
>miR9653a-3p Score: 1.5 R03G\_17213  
Query: 1 TTGGGACTTTGGGCTGGCC 19  
|::|||||||:|||||



Sbjct: 140 AGTCCTGAAACTCGACCGG 122  
>miR9653a-3p Score: 2.0 R03G\_17069  
Query: 1 TTGGGACTTTGGGCTGGCC 19  
|:|||||||\*|||||

Sbjct: 680 AGTCCTGAAACCCTACCGG 662  
>miR9653a-3p Score: 1.0 R03G\_16905  
Query: 1 TTGGGACTTTGGGCTGGCC 19  
|:|||||||:|||||||

Sbjct: 632 AGCCCTGAAACTCGACCGG 614  
>miR9653a-3p Score: 0.5 R03G\_16715  
Query: 1 TTGGGACTTTGGGCTGGCC 19  
|:|||||||:|||||||

Sbjct: 275 AGCCCTGAAACCCGACCGG 257  
>miR9653a-3p Score: 2.5 R03G\_16737  
Query: 1 TTGGGACTTTGGGCTGGCC 19  
|:\*|||||:||:|||||||

Sbjct: 449 AGGCCTGAGACTCGACCGG 431  
>miR9653a-3p Score: 2.0 R03G\_16377  
Query: 1 TTGGGACTTTGGGCTGGCC 19  
|:|:||||||:|||||||

Sbjct: 140 AGTCTTGAAACTCGACCGG 122  
>miR9653a-3p Score: 2.5 R03G\_16541  
Query: 1 TTGGGACTTTGGGCTGGCC 19  
|:\*|||||:||:|||||||

Sbjct: 449 AGGCCTGAGACTCGACCGG 431  
>miR9653a-3p Score: 2.0 R03G\_16548  
Query: 1 TTGGGACTTTGGGCTGGCC 19  
|:|:||||||:|||||||\*

Sbjct: 470 AGTCCTGAAACTCGACCGT 452  
>miR9653a-3p Score: 2.5 R03G\_16141  
Query: 1 TTGGGACTTTGGGCTGGCC 19  
|:\*|||||:||:|||||||

Sbjct: 449 AGGCCTGAGACTCGACCGG 431  
>miR9653a-3p Score: 1.5 R03G\_16118  
Query: 1 TTGGGACTTTGGGCTGGCC 19  
|:|:||||||:|||||||

Sbjct: 83 AGTCCTGAAACTCGACCGG 65  
>miR9653a-3p Score: 2.5 R03G\_16121  
Query: 1 TTGGGACTTTGGGCTGGCC 19  
|:\*|||||:||:|||||||

Sbjct: 404 AGGCCTGAGACTCGACCGG 386  
>miR9653a-3p Score: 2.5 R03G\_15672  
Query: 1 TTGGGACTTTGGGCTGGCC 19  
|:|:||||||:||\*|||||

Sbjct: 632 AGTCCTGAAACTCGTCCGG 614

>miR9653a-3p Score: 1.5 R03G\_15873  
Query: 1 TTGGGACTTTGGGCTGGCC 19  
|::|||||||:|||||||  
Sbjct: 815 AGTCCTGAAACTCGACCGG 797  
>miR9653a-3p Score: 2.5 R03G\_15286  
Query: 1 TTGGGACTTTGGGCTGGCC 19  
|:\*|||||:||:|||||||  
Sbjct: 449 AGGCCTGAGACTCGACCGG 431  
>miR9653a-3p Score: 2.5 R03G\_14972  
Query: 1 TTGGGACTTTGGGCTGGCC 19  
|:|||||||\*|\*|||||  
Sbjct: 746 AGCCCTGAAACACCACCGG 728  
>miR9653a-3p Score: 2.5 R03G\_14981  
Query: 1 TTGGGACTTTGGGCTGGCC 19  
|:\*|||||:||:|||||||  
Sbjct: 449 AGGCCTGAGACTCGACCGG 431  
>miR9653a-3p Score: 2.5 R03G\_14987  
Query: 1 TTGGGACTTTGGGCTGGCC 19  
|::|||||||:||\*|||||  
Sbjct: 479 AGTCCTGAAACTCGTCCGG 461  
>miR9653a-3p Score: 2.0 R03G\_14989  
Query: 1 TTGGGACTTTGGGCTGGCC 19  
|:|||||||:||\*|||||  
Sbjct: 671 AGCCCTGAAACTCGTCCGG 653  
>miR9653a-3p Score: 2.5 R03G\_15145  
Query: 1 TTGGGACTTTGGGCTGGCC 19  
|:\*|||||:||:|||||||  
Sbjct: 449 AGGCCTGAGACTCGACCGG 431  
>miR9653a-3p Score: 1.5 R03G\_15154  
Query: 1 TTGGGACTTTGGGCTGGCC 19  
|::|||||||:|||||||  
Sbjct: 815 AGTCCTGAAACTCGACCGG 797  
>miR9653a-3p Score: 2.5 R03G\_15170  
Query: 1 TTGGGACTTTGGGCTGGCC 19  
|:\*|||||:||:|||||||  
Sbjct: 449 AGGCCTGAGACTCGACCGG 431  
>miR9653a-3p Score: 2.0 R03G\_14361  
Query: 1 TTGGGACTTTGGGCTGGCC 19  
|::|||||||\*|||||  
Sbjct: 815 AGTCCTGAAACCCTACCGG 797  
>miR9653a-3p Score: 2.0 R03G\_14568  
Query: 1 TTGGGACTTTGGGCTGGCC 19  
|::|||||||\*|||||  
Sbjct: 815 AGTCCTGAAACCCTACCGG 797  
>miR9653a-3p Score: 2.5 R03G\_14620

Query: 1 TTGGGACTTTGGGCTGGCC 19  
|::|||||||:|\*|||  
Sbjct: 260 AGTCCTGAAACTCGTCCGG 242  
>miR9653a-3p Score: 2.5 R03G\_14772  
Query: 1 TTGGGACTTTGGGCTGGCC 19  
|::|||||||:|\*|||  
Sbjct: 710 AGTCCTGAAACTCGTCCGG 692  
>miR9653a-3p Score: 2.5 R03G\_14784  
Query: 1 TTGGGACTTTGGGCTGGCC 19  
|:\*|||||:|:|||||  
Sbjct: 449 AGGCCTGAGACTCGACCGG 431  
>miR9653a-3p Score: 1.5 R03G\_13447  
Query: 1 TTGGGACTTTGGGCTGGCC 19  
|::|||||||:|||||  
Sbjct: 815 AGTCCTGAAACTCGACCGG 797  
>miR9653a-3p Score: 1.5 R03G\_13706  
Query: 1 TTGGGACTTTGGGCTGGCC 19  
|::|||||||:|||||  
Sbjct: 773 AGTCCTGAAACTCGACCGG 755  
>miR9653a-3p Score: 2.5 R03G\_13752  
Query: 1 TTGGGACTTTGGGCTGGCC 19  
|:\*|||||:|:|||||  
Sbjct: 449 AGGCCTGAGACTCGACCGG 431  
>miR9653a-3p Score: 2.0 R03G\_13857  
Query: 1 TTGGGACTTTGGGCTGGCC 19  
|:|||||||:|\*|||  
Sbjct: 455 AGCCCTGAAACTCGTCCGG 437  
>miR9653a-3p Score: 2.5 R03G\_12670  
Query: 1 TTGGGACTTTGGGCTGGCC 19  
|::|||||||:|\*|||  
Sbjct: 632 AGTCCTGAAACTCGTCCGG 614  
>miR9653a-3p Score: 2.5 R03G\_12950  
Query: 1 TTGGGACTTTGGGCTGGCC 19  
|:\*|||||:|:|||||  
Sbjct: 449 AGGCCTGAGACTCGACCGG 431  
>miR9653a-3p Score: 1.5 R03G\_13276  
Query: 1 TTGGGACTTTGGGCTGGCC 19  
|::|||||||:|||||  
Sbjct: 197 AGTCCTGAAACTCGACCGG 179  
>miR9653a-3p Score: 2.0 R03G\_11966  
Query: 1 TTGGGACTTTGGGCTGGCC 19  
|::|||||||\*|||  
Sbjct: 815 AGTCCTGAAACCCTACCGG 797  
>miR9653a-3p Score: 1.5 R03G\_12013  
Query: 1 TTGGGACTTTGGGCTGGCC 19

|::|||||||:|||||||  
Sbjct: 140 AGTCCTGAAACTCGACCGG 122  
>miR9653a-3p Score: 2.5 R03G\_12082  
Query: 1 TTGGGACTTTGGGCTGGCC 19  
|::|||||||:|\*|||  
Sbjct: 710 AGTCCTGAAACTCGTCCGG 692  
>miR9653a-3p Score: 1.5 R03G\_12174  
Query: 1 TTGGGACTTTGGGCTGGCC 19  
|::|||||||:|||||||  
Sbjct: 140 AGTCCTGAAACTCGACCGG 122  
>miR9653a-3p Score: 2.0 R03G\_12186  
Query: 1 TTGGGACTTTGGGCTGGCC 19  
|:\*|||||||:|||||||  
Sbjct: 824 AGACCTGAAACTCGACCGG 806  
>miR9653a-3p Score: 2.0 R03G\_12196  
Query: 1 TTGGGACTTTGGGCTGGCC 19  
|:\*|||||||:|||||||  
Sbjct: 746 AGACCTGAAACTCGACCGG 728  
>miR9653a-3p Score: 1.0 R03G\_12525  
Query: 1 TTGGGACTTTGGGCTGGCC 19  
|:|||||||:|||||||  
Sbjct: 746 AGCCCTGAAACTCGACCGG 728  
>miR9653a-3p Score: 1.5 R03G\_12526  
Query: 1 TTGGGACTTTGGGCTGGCC 19  
|::|||||||:|||||||  
Sbjct: 815 AGTCCTGAAACTCGACCGG 797  
>miR9653a-3p Score: 2.5 R03G\_11158  
Query: 1 TTGGGACTTTGGGCTGGCC 19  
|||::||\*|||:|||||||  
Sbjct: 480 AACTTTGACACCTGACCGG 462  
>miR9653a-3p Score: 1.5 R03G\_11244  
Query: 1 TTGGGACTTTGGGCTGGCC 19  
|::|||||||:|||||||  
Sbjct: 815 AGTCCTGAAACTCGACCGG 797  
>miR9653a-3p Score: 1.5 R03G\_11263  
Query: 1 TTGGGACTTTGGGCTGGCC 19  
|::|||||||:|||||||  
Sbjct: 140 AGTCCTGAAACTCGACCGG 122  
>miR9653a-3p Score: 1.0 R03G\_11273  
Query: 1 TTGGGACTTTGGGCTGGCC 19  
|:|||||||:|||||||  
Sbjct: 155 AGCCCTGAAACTCGACCGG 137  
>miR9653a-3p Score: 2.5 R03G\_11405  
Query: 1 TTGGGACTTTGGGCTGGCC 19  
|::|||||||:|\*|||

Sbjct: 632 AGTCCTGAAACTCGTCCGG 614  
>miR9653a-3p Score: 1.5 R03G\_11528  
Query: 1 TTGGGACTTTGGGCTGGCC 19  
|::|||||||:|||||||  
Sbjct: 140 AGTCCTGAAACTCGACCGG 122  
>miR9653a-3p Score: 2.5 R03G\_11533  
Query: 1 TTGGGACTTTGGGCTGGCC 19  
|:\*|||||:||:|||||||  
Sbjct: 449 AGGCCTGAGACTCGACCGG 431  
>miR9653a-3p Score: 2.5 R03G\_11534  
Query: 1 TTGGGACTTTGGGCTGGCC 19  
|::||\*|||||:|||||||  
Sbjct: 815 AGTCCCGAAACTCGACCGG 797  
>miR9653a-3p Score: 2.5 R03G\_11536  
Query: 1 TTGGGACTTTGGGCTGGCC 19  
|:\*|||||:||:|||||||  
Sbjct: 449 AGGCCTGAGACTCGACCGG 431  
>miR9653a-3p Score: 1.5 R03G\_11948  
Query: 1 TTGGGACTTTGGGCTGGCC 19  
|::|||||||:|||||||  
Sbjct: 815 AGTCCTGAAACTCGACCGG 797  
>miR9653a-3p Score: 1.5 R03G\_10528  
Query: 1 TTGGGACTTTGGGCTGGCC 19  
|::|||||||:|||||||  
Sbjct: 140 AGTCCTGAAACTCGACCGG 122  
>miR9653a-3p Score: 1.5 R03G\_10537  
Query: 1 TTGGGACTTTGGGCTGGCC 19  
|::|||||||:|||||||  
Sbjct: 638 AGTCCTGAAACTCGACCGG 620  
>miR9653a-3p Score: 1.5 R03G\_10720  
Query: 1 TTGGGACTTTGGGCTGGCC 19  
|::|||||||:|||||||  
Sbjct: 815 AGTCCTGAAACTCGACCGG 797  
>miR9653a-3p Score: 2.5 R03G\_10729  
Query: 1 TTGGGACTTTGGGCTGGCC 19  
|::|||||||\*|:|||  
Sbjct: 815 AGTCCTGAAACCCTATCGG 797  
>miR9653a-3p Score: 1.5 R03G\_10742  
Query: 1 TTGGGACTTTGGGCTGGCC 19  
|::|||||||:|||||||  
Sbjct: 140 AGTCCTGAAACTCGACCGG 122  
>miR9653a-3p Score: 1.5 R03G\_10805  
Query: 1 TTGGGACTTTGGGCTGGCC 19  
|:||||\*|||||||  
Sbjct: 824 AGCCCTTAAACCCGACCGG 806

>miR9653a-3p Score: 0.0 R03G\_10862  
Query: 1 TTGGGACTTTGGGCTGGCC 19  
|||||  
Sbjct: 347 AACCTGAAACCCGACCGG 329

>miR9653a-3p Score: 1.5 R03G\_09199  
Query: 1 TTGGGACTTTGGGCTGGCC 19  
|::|||||:|||||  
Sbjct: 815 AGTCCTGAAACTCGACCGG 797

>miR9653a-3p Score: 1.5 R03G\_09924  
Query: 1 TTGGGACTTTGGGCTGGCC 19  
|::|||||:|||||  
Sbjct: 815 AGTCCTGAAACTCGACCGG 797

>miR9653a-3p Score: 2.5 R03G\_09926  
Query: 1 TTGGGACTTTGGGCTGGCC 19  
|:\*||||:|:|||||  
Sbjct: 449 AGGCCTGAGACTCGACCGG 431

>miR9653a-3p Score: 2.5 R03G\_09944  
Query: 1 TTGGGACTTTGGGCTGGCC 19  
|::|||||:|\*|||  
Sbjct: 632 AGTCCTGAAACTCGTCCGG 614

>miR9653a-3p Score: 1.0 R03G\_09955  
Query: 1 TTGGGACTTTGGGCTGGCC 19  
|:|||||:|||||  
Sbjct: 509 AGCCCTGAAACTCGACCGG 491

>miR9653a-3p Score: 2.0 R03G\_09967  
Query: 1 TTGGGACTTTGGGCTGGCC 19  
|::|||||\*|||  
Sbjct: 815 AGTCCTGAAACCCTACCGG 797

>miR9653a-3p Score: 1.5 R03G\_10044  
Query: 1 TTGGGACTTTGGGCTGGCC 19  
|::|||||:|||||  
Sbjct: 815 AGTCCTGAAACTCGACCGG 797

>miR9653a-3p Score: 2.5 R03G\_10050  
Query: 1 TTGGGACTTTGGGCTGGCC 19  
|:\*||||:|:|||||  
Sbjct: 449 AGGCCTGAGACTCGACCGG 431

>miR9653a-3p Score: 2.5 R03G\_10224  
Query: 1 TTGGGACTTTGGGCTGGCC 19  
|::|||||:|\*|||  
Sbjct: 632 AGTCCTGAAACTCGTCCGG 614

>miR9653a-3p Score: 2.5 R03G\_10226  
Query: 1 TTGGGACTTTGGGCTGGCC 19  
|::|||||:|\*|||  
Sbjct: 632 AGTCCTGAAACTCGTCCGG 614

>miR9653a-3p Score: 1.5 R03G\_07994

Query: 1 TTGGGACTTTGGGCTGGCC 19  
|::|||||||:|||||||  
Sbjct: 815 AGTCCTGAAACTCGACCGG 797  
>miR9653a-3p Score: 2.5 R03G\_08649  
Query: 1 TTGGGACTTTGGGCTGGCC 19  
|::|||||||:||\*|||  
Sbjct: 577 AGTCCTGAAACTCGTCCGG 559  
>miR9653a-3p Score: 2.0 R03G\_08658  
Query: 1 TTGGGACTTTGGGCTGGCC 19  
|:|||||||:||\*|||  
Sbjct: 632 AGCCCTGAAACTCGTCCGG 614  
>miR9653a-3p Score: 1.5 R03G\_08835  
Query: 1 TTGGGACTTTGGGCTGGCC 19  
|::|||||||:|||||||  
Sbjct: 125 AGTCCTGAAACTCGACCGG 107  
>miR9653a-3p Score: 2.5 R03G\_08848  
Query: 1 TTGGGACTTTGGGCTGGCC 19  
|::||\*|||:|||||||  
Sbjct: 125 AGTCCCGAAACTCGACCGG 107  
>miR9653a-3p Score: 1.0 R03G\_07024  
Query: 1 TTGGGACTTTGGGCTGGCC 19  
|:|||||||:|||||||  
Sbjct: 824 AGCCCTGAAACTCGACCGG 806  
>miR9653a-3p Score: 1.5 R03G\_07119  
Query: 1 TTGGGACTTTGGGCTGGCC 19  
|::|||||||:|||||||  
Sbjct: 140 AGTCCTGAAACTCGACCGG 122  
>miR9653a-3p Score: 1.0 R03G\_07121  
Query: 1 TTGGGACTTTGGGCTGGCC 19  
|:|||||||:|||||||  
Sbjct: 824 AGCCCTGAAACTCGACCGG 806  
>miR9653a-3p Score: 1.5 R03G\_07295  
Query: 1 TTGGGACTTTGGGCTGGCC 19  
|::|||||||:|||||||  
Sbjct: 647 AGTCCTGAAACTCGACCGG 629  
>miR9653a-3p Score: 2.5 R03G\_07298  
Query: 1 TTGGGACTTTGGGCTGGCC 19  
|:\*|||:|:|||||||  
Sbjct: 449 AGGCCTGAGACTCGACCGG 431  
>miR9653a-3p Score: 2.5 R03G\_07302  
Query: 1 TTGGGACTTTGGGCTGGCC 19  
|::|||||||:||\*|||  
Sbjct: 632 AGTCCTGAAACTCGTCCGG 614  
>miR9653a-3p Score: 2.0 R03G\_07651  
Query: 1 TTGGGACTTTGGGCTGGCC 19

|||||||:|\*||  
Sbjct: 5211 AACCTGAAACTCGAT-GG 5194  
>miR9653a-3p Score: 1.5 R03G\_07683  
Query: 1 TTGGGACTTTGGGCTGGCC 19  
|::|||||||:|||||||  
Sbjct: 815 AGTCCTGAAACTCGACCGG 797  
>miR9653a-3p Score: 2.5 R03G\_07689  
Query: 1 TTGGGACTTTGGGCTGGCC 19  
|::|||||||:|\*|||  
Sbjct: 632 AGTCCTGAAACTCGTCCGG 614  
>miR9653a-3p Score: 2.5 R03G\_07723  
Query: 1 TTGGGACTTTGGGCTGGCC 19  
|:\*|||||:|:|||||||  
Sbjct: 449 AGGCCTGAGACTCGACCGG 431  
>miR9653a-3p Score: 2.0 R03G\_07860  
Query: 1 TTGGGACTTTGGGCTGGCC 19  
|::|||||||\*|||||  
Sbjct: 815 AGTCCTGAAACCCTACCGG 797  
>miR9653a-3p Score: 2.5 R03G\_05522  
Query: 1 TTGGGACTTTGGGCTGGCC 19  
|:\*|||||:|:|||||||  
Sbjct: 815 AGGCCTGAGACTCGACCGG 797  
>miR9653a-3p Score: 1.5 R03G\_05916  
Query: 1 TTGGGACTTTGGGCTGGCC 19  
|::|||||||:|||||||  
Sbjct: 815 AGTCCTGAAACTCGACCGG 797  
>miR9653a-3p Score: 2.0 R03G\_05921  
Query: 1 TTGGGACTTTGGGCTGGCC 19  
|::|||||||\*|||||  
Sbjct: 815 AGTCCTGAAACCCTACCGG 797  
>miR9653a-3p Score: 0.5 R03G\_05950  
Query: 1 TTGGGACTTTGGGCTGGCC 19  
|:|||||||  
Sbjct: 293 AGCCCTGAAACCCGACCGG 275  
>miR9653a-3p Score: 2.0 R03G\_05953  
Query: 1 TTGGGACTTTGGGCTGGCC 19  
|::|||||||\*|||||  
Sbjct: 815 AGTCCTGAAACCCTACCGG 797  
>miR9653a-3p Score: 2.0 R03G\_05959  
Query: 1 TTGGGACTTTGGGCTGGCC 19  
|::|||||||\*|||||  
Sbjct: 815 AGTCCTGAAACCCTACCGG 797  
>miR9653a-3p Score: 2.5 R03G\_06721  
Query: 1 TTGGGACTTTGGGCTGGCC 19  
|::|||||||:|\*|||



Sbjct: 629 AGTCCTGAAACTCGTCCGG 611  
>miR9653a-3p Score: 2.5 R03G\_04654  
Query: 1 TTGGGACTTTGGGCTGGCC 19  
|:|||||||:|\*|||  
Sbjct: 632 AGTCCTGAAACTCGTCCGG 614  
>miR9653a-3p Score: 1.5 R03G\_04661  
Query: 1 TTGGGACTTTGGGCTGGCC 19  
|:|||||||\*|||  
Sbjct: 455 AGCCCTGAAACCCGTCCGG 437  
>miR9653a-3p Score: 2.5 R03G\_04668  
Query: 1 TTGGGACTTTGGGCTGGCC 19  
|:\*|||||:|:|||||  
Sbjct: 626 AGGCCTGAGACTCGACCGG 608  
>miR9653a-3p Score: 1.0 R03G\_04786  
Query: 1 TTGGGACTTTGGGCTGGCC 19  
|:|||||||:|||||  
Sbjct: 392 AGCCCTGAAACTCGACCGG 374  
>miR9653a-3p Score: 2.0 R03G\_05267  
Query: 1 TTGGGACTTTGGGCTGGCC 19  
|:|||||||\*|||  
Sbjct: 815 AGTCCTGAAACCCTACCGG 797  
>miR9653a-3p Score: 2.5 R03G\_05516  
Query: 1 TTGGGACTTTGGGCTGGCC 19  
|:\*|||||:|:|||||  
Sbjct: 449 AGGCCTGAGACTCGACCGG 431  
>miR9653a-3p Score: 1.0 R03G\_02700  
Query: 1 TTGGGACTTTGGGCTGGCC 19  
|:|||||||:|||||  
Sbjct: 509 AGCCCTGAAACTCGACCGG 491  
>miR9653a-3p Score: 1.5 R03G\_03558  
Query: 1 TTGGGACTTTGGGCTGGCC 19  
|:|||||||:|||||  
Sbjct: 815 AGTCCTGAAACTCGACCGG 797  
>miR9653a-3p Score: 2.5 R03G\_03560  
Query: 1 TTGGGACTTTGGGCTGGCC 19  
|:\*|||||:|:|||||  
Sbjct: 449 AGGCCTGAGACTCGACCGG 431  
>miR9653a-3p Score: 1.0 R03G\_03570  
Query: 1 TTGGGACTTTGGGCTGGCC 19  
|:|||||||:|||||  
Sbjct: 509 AGCCCTGAAACTCGACCGG 491  
>miR9653a-3p Score: 2.0 R03G\_03599  
Query: 1 TTGGGACTTTGGGCTGGCC 19  
|:||||\*||||:|||||  
Sbjct: 824 AGCCCTAAAACCTCGACCGG 806

>miR9653a-3p Score: 0.5 R03G\_03605  
Query: 1 TTGGGACTTTGGGCTGGCC 19  
|:||||||||||||||  
Sbjct: 1277 AGCCCTGAAACCCGACCGG 1259

>miR9653a-3p Score: 1.5 R03G\_03617  
Query: 1 TTGGGACTTTGGGCTGGCC 19  
|::|||||||:|||||||  
Sbjct: 815 AGTCCTGAAACTCGACCGG 797

>miR9653a-3p Score: 2.5 R03G\_03785  
Query: 1 TTGGGACTTTGGGCTGGCC 19  
|::|||||||:|\*|||  
Sbjct: 437 AGTCCTGAAACTCGTCCGG 419

>miR9653a-3p Score: 2.5 R03G\_03791  
Query: 1 TTGGGACTTTGGGCTGGCC 19  
|:\*|||||:||:|||||||  
Sbjct: 449 AGGCCTGAGACTCGACCGG 431

>miR9653a-3p Score: 2.5 R03G\_03797  
Query: 1 TTGGGACTTTGGGCTGGCC 19  
|::|||||||:|\*|||  
Sbjct: 320 AGTCCTGAAACTCGTCCGG 302

>miR9653a-3p Score: 1.5 R03G\_03987  
Query: 1 TTGGGACTTTGGGCTGGCC 19  
|::|||||||:|||||||  
Sbjct: 815 AGTCCTGAAACTCGACCGG 797

>miR9653a-3p Score: 2.5 R03G\_04200  
Query: 1 TTGGGACTTTGGGCTGGCC 19  
|::|||||||:|\*|||  
Sbjct: 632 AGTCCTGAAACTCGTCCGG 614

>miR9653a-3p Score: 2.5 R03G\_04207  
Query: 1 TTGGGACTTTGGGCTGGCC 19  
|::|:|||||||\*|||  
Sbjct: 815 AGTCTTGAAACCCTACCGG 797

>miR9653a-3p Score: 2.5 R03G\_00240  
Query: 1 TTGGGACTTTGGGCTGGCC 19  
|:\*|||||:||:|||||||  
Sbjct: 758 AGGCCTGAGACTCGACCGG 740

>miR9653a-3p Score: 2.5 R03G\_00247  
Query: 1 TTGGGACTTTGGGCTGGCC 19  
|::|||||||:|\*|||  
Sbjct: 632 AGTCCTGAAACTCGTCCGG 614

>miR9653a-3p Score: 2.0 R03G\_00256  
Query: 1 TTGGGACTTTGGGCTGGCC 19  
|::|||||||\*|||  
Sbjct: 815 AGTCCTGAAACCCTACCGG 797

>miR9653a-3p Score: 2.5 R03G\_00675

Query: 1 TTGGGACTTTGGGCTGGCC 19  
|:\*|||||:|:|||||||  
Sbjct: 449 AGGCCTGAGACTCGACCGG 431  
>miR9653a-3p Score: 0.5 R03G\_00677  
Query: 1 TTGGGACTTTGGGCTGGCC 19  
|:|||||||:|||||||  
Sbjct: 377 AGCCCTGAAACCCGACCGG 359  
>miR9653a-3p Score: 2.5 R03G\_00689  
Query: 1 TTGGGACTTTGGGCTGGCC 19  
|:\*|||||:|:|||||||  
Sbjct: 317 AGGCCTGAGACTCGACCGG 299  
>miR9653a-3p Score: 1.0 R03G\_00690  
Query: 1 TTGGGACTTTGGGCTGGCC 19  
|:|||||||:|||||||  
Sbjct: 764 AGCCCTGAAACTCGACCGG 746  
>miR9653a-3p Score: 1.5 R03G\_01194  
Query: 1 TTGGGACTTTGGGCTGGCC 19  
|:|||||||:|||||||  
Sbjct: 815 AGTCCTGAAACTCGACCGG 797  
>miR9653a-3p Score: 1.5 R03G\_01313  
Query: 1 TTGGGACTTTGGGCTGGCC 19  
|:|||||||:|||||||  
Sbjct: 815 AGTCCTGAAACTCGACCGG 797  
>miR9653a-3p Score: 2.0 R03G\_01587  
Query: 1 TTGGGACTTTGGGCTGGCC 19  
|:|||||||:|\*|||  
Sbjct: 641 AGCCCTGAAACTCGTCCGG 623  
>miR9653a-3p Score: 0.5 R03G\_01588  
Query: 1 TTGGGACTTTGGGCTGGCC 19  
|:|||||||:|||||||  
Sbjct: 155 AGCCCTGAAACCCGACCGG 137  
>miR9653a-3p Score: 2.5 R03G\_01725  
Query: 1 TTGGGACTTTGGGCTGGCC 19  
|:\*|||||:|:|||||||  
Sbjct: 449 AGGCCTGAGACTCGACCGG 431  
>miR9653a-3p Score: 1.5 R03G\_01735  
Query: 1 TTGGGACTTTGGGCTGGCC 19  
|:|||||||:|||||||  
Sbjct: 815 AGTCCTGAAACTCGACCGG 797  
>miR9653a-3p Score: 1.0 R03G\_01925  
Query: 1 TTGGGACTTTGGGCTGGCC 19  
|:|||||||:|||||||  
Sbjct: 824 AGCCCTGAAACTCGACCGG 806  
>miR9653a-3p Score: 1.5 R03G\_01950  
Query: 1 TTGGGACTTTGGGCTGGCC 19

|::|||||||:|||||||  
Sbjct: 815 AGTCCTGAAACTCGACCGG 797  
>miR9653a-3p Score: 1.5 R03G\_01951  
Query: 1 TTGGGACTTTGGGCTGGCC 19  
|::|||||||:|||||||  
Sbjct: 815 AGTCCTGAAACTCGACCGG 797  
>miR9653a-3p Score: 2.5 R03G\_02227  
Query: 1 TTGGGACTTTGGGCTGGCC 19  
|:\*|||||:||:|||||||  
Sbjct: 815 AGGCCTGAGACTCGACCGG 797  
>miR9653a-3p Score: 2.0 R03G\_17449  
Query: 1 TTGGGACTTTGGGCTGGCC 19  
|::|||||||\*|||||  
Sbjct: 815 AGTCCTGAAACCCTACCGG 797  
>miR9653a-3p Score: 2.5 R03G\_17436  
Query: 1 TTGGGACTTTGGGCTGGCC 19  
|::|||||||:||\*|||||  
Sbjct: 632 AGTCCTGAAACTCGTCCGG 614  
>miR9653a-3p Score: 2.5 R03G\_17423  
Query: 1 TTGGGACTTTGGGCTGGCC 19  
|:\*|||||:||:|||||||  
Sbjct: 449 AGGCCTGAGACTCGACCGG 431  
>miR9653a-3p Score: 1.5 R03G\_17409  
Query: 1 TTGGGACTTTGGGCTGGCC 19  
|::|||||||:|||||||  
Sbjct: 815 AGTCCTGAAACTCGACCGG 797  
>miR9653a-3p Score: 0.5 R03G\_17406  
Query: 1 TTGGGACTTTGGGCTGGCC 19  
|:|||||||  
Sbjct: 176 AGCCCTGAAACCCGACCGG 158  
>miR9653a-3p Score: 2.0 R03G\_17361  
Query: 1 TTGGGACTTTGGGCTGGCC 19  
|:|||||||:||\*|||||  
Sbjct: 392 AGCCCTGAAACTCGTCCGG 374  
>miR9653a-3p Score: 2.5 R03G\_17328  
Query: 1 TTGGGACTTTGGGCTGGCC 19  
|:\*|||||:||:|||||||  
Sbjct: 449 AGGCCTGAGACTCGACCGG 431  
>miR9653a-3p Score: 2.5 R03G\_17293  
Query: 1 TTGGGACTTTGGGCTGGCC 19  
|::|||||||:||\*|||||  
Sbjct: 632 AGTCCTGAAACTCGTCCGG 614  
>miR9653a-3p Score: 2.5 R03G\_17092  
Query: 1 TTGGGACTTTGGGCTGGCC 19  
|:\*|||||:||:|||||||

Sbjct: 449 AGGCCTGAGACTCGACCGG 431  
>miR419 Score: 2.0 R03G\_17196  
Query: 1 TGAGGAATGATGACGTGA-G 19  
|||:||||:|||||||\*\*|  
Sbjct: 518 ACTTCTTATTACTGCACAAC 499  
>miR419 Score: 2.5 R03G\_14928  
Query: 1 TGAGGAATGATGACGTGAG 19  
\*|||\*|||||||:|  
Sbjct: 47 TCTCATTACTACTGTGCTC 29  
>miR419 Score: 2.5 R03G\_14934  
Query: 1 TGAGGAATGATGACGTGAG 19  
\*|||\*|||||||:|  
Sbjct: 47 TCTCATTACTACTGTGCTC 29  
>miR419 Score: 1.8 R03G\_13948  
Query: 1 TGAGGAATGATGACGTGAG 19  
:|:|||||||\*|||  
Sbjct: 1827 GCTTCTTACTACTCCACTC 1809  
>miR419 Score: 2.5 R03G\_11316  
Query: 1 TGAGGAATGATGACGTGAG 19  
||\*|||||:|:|||||\*  
Sbjct: 849 ACACCTTATTATTGCACTA 831  
>miR419 Score: 2.5 R03G\_08802  
Query: 1 TGAGGAATGATGACGTGAG 19  
|||||||\*|||:\*\*  
Sbjct: 626 ACTCCTTACTACAGCATAA 608  
>miR419 Score: 2.0 R03G\_05065  
Query: 1 TGAGGAATGATGACGTGA-G 19  
|||:||||:|||||||\*\*|  
Sbjct: 518 ACTTCTTATTACTGCACAAC 499  
>miR419 Score: 2.5 R03G\_02287  
Query: 1 TGAGGAATGATGACGTGAG 19  
|||:|||||||\*|||\*|  
Sbjct: 153 ACTTCTTACTATCGCAC-C 136  
>miR419 Score: 2.2 R03G\_02333  
Query: 1 TGAGGAATGATGACGTGAG 19  
|||:|||:|||||\*|||:  
Sbjct: 138 ACTTCTTGCTACTACACTT 120  
>miR419 Score: 2.5 R03G\_02459  
Query: 1 TGAGGAATGATGACGTGAG 19  
|||||||:||||\*|:|\*|  
Sbjct: 656 ACTCCTTGCTACCGTACAC 638  
>miR419 Score: 0.0 R03G\_17296  
Query: 1 TGAGGAATGATGACGTGAG 19  
|||||||  
Sbjct: 192 ACTCCTTACTACTGCACTC 174

>miR419 Score: 2.5 R03G\_17114  
Query: 1 TGAGGAATGATGACGTGAG 19  
|||\*|||||||\*|||\*  
Sbjct: 491 ACTACTTACTACTGAACTA 473

>miR6477 Score: 2.5 R03G\_17265  
Query: 1 TGAACAGTAGAGGATGAT 18  
\*|||||:|\*|||||||  
Sbjct: 101 CCTTGTTGTCACCTACTA 84

>miR6477 Score: 2.5 R03G\_17244  
Query: 1 TGAACAGTAGAGGATGAT 18  
\*|||||:|\*|||||||  
Sbjct: 101 CCTTGTTGTCACCTACTA 84

>miR6477 Score: 2.5 R03G\_17210  
Query: 1 TGAACAGTAGAGGATGAT 18  
\*|||||:|\*|||||||  
Sbjct: 101 CCTTGTTGTCACCTACTA 84

>miR6477 Score: 0.0 R03G\_17215  
Query: 1 TGAACAGTAGAGGATGAT 18  
|||||||  
Sbjct: 110 ACTTGTCATCTCCTACTA 93

>miR6477 Score: 0.0 R03G\_16897  
Query: 1 TGAACAGTAGAGGATGAT 18  
|||||||  
Sbjct: 110 ACTTGTCATCTCCTACTA 93

>miR6477 Score: 2.5 R03G\_16743  
Query: 1 TGAACAGTAGAGGATGAT 18  
\*|||||:|\*|||||||  
Sbjct: 101 CCTTGTTGTCACCTACTA 84

>miR6477 Score: 2.5 R03G\_16748  
Query: 1 TGAACAGTAGAGGATGAT 18  
\*|||||:|\*|||||||  
Sbjct: 101 CCTTGTTGTCACCTACTA 84

>miR6477 Score: 0.0 R03G\_16807  
Query: 1 TGAACAGTAGAGGATGAT 18  
|||||||  
Sbjct: 110 ACTTGTCATCTCCTACTA 93

>miR6477 Score: 2.5 R03G\_16369  
Query: 1 TGAACAGTAGAGGATGAT 18  
\*|||||:|\*|||||||  
Sbjct: 101 CCTTGTTGTCACCTACTA 84

>miR6477 Score: 2.2 R03G\_16436  
Query: 1 TGAACAGTAGAGGATGAT 18  
::|||||:||||:|:|  
Sbjct: 444 GTTTGTCTCTCTTATTA 427

>miR6477 Score: 2.0 R03G\_16482

Query: 1 TGAACAGTAGAGGATGAT 18  
||\*|||  
Sbjct: 122 ACATTTTCATCTCCTACTA 105  
>miR6477 Score: 1.0 R03G\_16551  
Query: 1 TGAACAGTAGAGGATGAT 18  
|||\*|||  
Sbjct: 110 ACTTGTCACCTCCTACTA 93  
>miR6477 Score: 1.0 R03G\_16555  
Query: 1 TGAACAGTAGAGGATGAT 18  
|||\*|||  
Sbjct: 110 ACTTGTCACCTCCTACTA 93  
>miR6477 Score: 2.5 R03G\_15879  
Query: 1 TGAACAGTAGAGGATGAT 18  
\*|||:|\*|||  
Sbjct: 101 CCTTGTTGTCACCTACTA 84  
>miR6477 Score: 2.5 R03G\_15897  
Query: 1 TGAACAGTAGAGGATGAT 18  
\*|||:|\*|||  
Sbjct: 101 CCTTGTTGTCACCTACTA 84  
>miR6477 Score: 1.5 R03G\_16099  
Query: 1 TGAACAGTAGAGGATGAT 18  
||\*|||:|  
Sbjct: 764 ACTAGTCATCTTCTACTA 747  
>miR6477 Score: 0.0 R03G\_15675  
Query: 1 TGAACAGTAGAGGATGAT 18  
|||  
Sbjct: 110 ACTTGTCATCTCCTACTA 93  
>miR6477 Score: 2.5 R03G\_14963  
Query: 1 TGAACAGTAGAGGATGAT 18  
\*|||\*|||  
Sbjct: 615 CCTTGTCATCAACTACTA 598  
>miR6477 Score: 0.0 R03G\_14359  
Query: 1 TGAACAGTAGAGGATGAT 18  
|||  
Sbjct: 110 ACTTGTCATCTCCTACTA 93  
>miR6477 Score: 2.5 R03G\_14551  
Query: 1 TGAACAGTAGAGGATGAT 18  
\*|||:|\*|||  
Sbjct: 101 CCTTGTTGTCACCTACTA 84  
>miR6477 Score: 2.5 R03G\_14553  
Query: 1 TGAACAGTAGAGGATGAT 18  
\*|||:|\*|||  
Sbjct: 101 CCTTGTTGTCACCTACTA 84  
>miR6477 Score: 2.5 R03G\_14690  
Query: 1 TGAACAGTAGAGGATGAT 18





Sbjct: 101 CCTTGTTGTCACCTACTA 84  
>miR6477 Score: 1.0 R03G\_11401  
Query: 1 TGAACAGTAGAGGATGAT 18  
|||||||\*|||||||  
Sbjct: 110 ACTTGTCACCTCCTACTA 93  
>miR6477 Score: 2.5 R03G\_11537  
Query: 1 TGAACAGTAGAGGATGAT 18  
\*|||||:|\*|||||||  
Sbjct: 101 CCTTGTTGTCACCTACTA 84  
>miR6477 Score: 2.5 R03G\_11543  
Query: 1 TGAACAGTAGAGGATGAT 18  
\*|||||:|\*|||||||  
Sbjct: 101 CCTTGTTGTCACCTACTA 84  
>miR6477 Score: 2.5 R03G\_11651  
Query: 1 TGAACAGTAGAGGATGAT 18  
:|||||\*|||:|:|:  
Sbjct: 3200 GCTTGTCTTCTTCTGCTG 3183  
>miR6477 Score: 1.0 R03G\_11773  
Query: 1 TGAACAGTAGAGGATGAT 18  
|||||||\*|||||||  
Sbjct: 110 ACTTGTCACCTCCTACTA 93  
>miR6477 Score: 0.0 R03G\_10235  
Query: 1 TGAACAGTAGAGGATGAT 18  
|||||||  
Sbjct: 110 ACTTGTCATCTCCTACTA 93  
>miR6477 Score: 0.0 R03G\_10732  
Query: 1 TGAACAGTAGAGGATGAT 18  
|||||||  
Sbjct: 110 ACTTGTCATCTCCTACTA 93  
>miR6477 Score: 0.0 R03G\_09483  
Query: 1 TGAACAGTAGAGGATGAT 18  
|||||||  
Sbjct: 110 ACTTGTCATCTCCTACTA 93  
>miR6477 Score: 0.0 R03G\_09499  
Query: 1 TGAACAGTAGAGGATGAT 18  
|||||||  
Sbjct: 110 ACTTGTCATCTCCTACTA 93  
>miR6477 Score: 0.0 R03G\_09544  
Query: 1 TGAACAGTAGAGGATGAT 18  
|||||||  
Sbjct: 110 ACTTGTCATCTCCTACTA 93  
>miR6477 Score: 2.5 R03G\_09602  
Query: 1 TGAACAGTAGAGGATGAT 18  
\*|||||:|\*|||||||  
Sbjct: 101 CCTTGTTGTCACCTACTA 84

>miR6477 Score: 2.5 R03G\_09603  
Query: 1 TGAACAGTAGAGGATGAT 18  
\*|||||:|\*||||||  
Sbjct: 101 CCTTGTTGTCACCTACTA 84

>miR6477 Score: 1.0 R03G\_09607  
Query: 1 TGAACAGTAGAGGATGAT 18  
|||||||\*|||||||  
Sbjct: 110 ACTTGTCACCTCCTACTA 93

>miR6477 Score: 2.5 R03G\_09842  
Query: 1 TGAACAGTAGAGGATGAT 18  
|||||:||||:|\*|||\*  
Sbjct: 2078 ACTTGTTATCTTCAACTT 2061

>miR6477 Score: 2.5 R03G\_09929  
Query: 1 TGAACAGTAGAGGATGAT 18  
\*|||||:|\*||||||  
Sbjct: 101 CCTTGTTGTCACCTACTA 84

>miR6477 Score: 2.5 R03G\_10043  
Query: 1 TGAACAGTAGAGGATGAT 18  
\*|||||:|\*||||||  
Sbjct: 101 CCTTGTTGTCACCTACTA 84

>miR6477 Score: 2.5 R03G\_10218  
Query: 1 TGAACAGTAGAGGATGAT 18  
\*|||||:|\*||||||  
Sbjct: 101 CCTTGTTGTCACCTACTA 84

>miR6477 Score: 2.5 R03G\_07981  
Query: 1 TGAACAGTAGAGGATGAT 18  
\*|||||:|\*||||||  
Sbjct: 101 CCTTGTTGTCACCTACTA 84

>miR6477 Score: 2.2 R03G\_08245  
Query: 1 TGAACAGTAGAGGATGAT 18  
::|||||:|:|:||||  
Sbjct: 444 GTTTGTGCGTTTCTTACTA 427

>miR6477 Score: 1.5 R03G\_08661  
Query: 1 TGAACAGTAGAGGATGAT 18  
|:|||||\*|||||||  
Sbjct: 110 ATTTGTCACCTCCTACTA 93

>miR6477 Score: 1.0 R03G\_08846  
Query: 1 TGAACAGTAGAGGATGAT 18  
|||||||\*|||||||  
Sbjct: 110 ACTTGTCACCTCCTACTA 93

>miR6477 Score: 2.0 R03G\_08852  
Query: 1 TGAACAGTAGAGGATGAT 18  
\*|||||:|||||:|\*  
Sbjct: 578 CCTTGTCGTCTCCTGCTC 561

>miR6477 Score: 2.5 R03G\_06730

Query: 1 TGAACAGTAGAGGATGAT 18  
\*|||||:|\*|||||  
Sbjct: 101 CCTTGTTGTCACCTACTA 84  
>miR6477 Score: 2.5 R03G\_06990  
Query: 1 TGAACAGTAGAGGATGAT 18  
\*|||||:|\*|||:|  
Sbjct: 101 CCTTGTCGTCACCTGCTA 84  
>miR6477 Score: 1.0 R03G\_07210  
Query: 1 TGAACAGTAGAGGATGAT 18  
|||||||:|  
Sbjct: 920 ACTTGTCATCTCCTGTTA 903  
>miR6477 Score: 0.0 R03G\_07303  
Query: 1 TGAACAGTAGAGGATGAT 18  
|||||||:|  
Sbjct: 110 ACTTGTCATCTCCTACTA 93  
>miR6477 Score: 2.5 R03G\_07306  
Query: 1 TGAACAGTAGAGGATGAT 18  
\*|||||:|\*|||||  
Sbjct: 101 CCTTGTTGTCACCTACTA 84  
>miR6477 Score: 2.5 R03G\_07696  
Query: 1 TGAACAGTAGAGGATGAT 18  
\*|||||:|\*|||||  
Sbjct: 101 CCTTGTTGTCACCTACTA 84  
>miR6477 Score: 1.0 R03G\_07704  
Query: 1 TGAACAGTAGAGGATGAT 18  
|||||||\*|||||  
Sbjct: 110 ACTTGTCACCTCCTACTA 93  
>miR6477 Score: 2.5 R03G\_07720  
Query: 1 TGAACAGTAGAGGATGAT 18  
\*|||||:|\*|||||  
Sbjct: 101 CCTTGTTGTCACCTACTA 84  
>miR6477 Score: 2.5 R03G\_07738  
Query: 1 TGAACAGTAGAGGATGAT 18  
\*|||||:|\*|||||  
Sbjct: 101 CCTTGTTGTCACCTACTA 84  
>miR6477 Score: 0.0 R03G\_07875  
Query: 1 TGAACAGTAGAGGATGAT 18  
|||||||:|  
Sbjct: 110 ACTTGTCATCTCCTACTA 93  
>miR6477 Score: 1.0 R03G\_05622  
Query: 1 TGAACAGTAGAGGATGAT 18  
|||||||\*|||||  
Sbjct: 110 ACTTGTCACCTCCTACTA 93  
>miR6477 Score: 0.0 R03G\_05635  
Query: 1 TGAACAGTAGAGGATGAT 18

```
|||||
Sbjct: 110 ACTTGTCATCTCCTACTA 93
>miR6477 Score: 2.5 R03G_05906
Query: 1 TGAACAGTAGAGGATGAT 18
*|||||:|*|||||
Sbjct: 101 CCTTGTTGTCACCTACTA 84
>miR6477 Score: 1.0 R03G_05915
Query: 1 TGAACAGTAGAGGATGAT 18
||*|||||
Sbjct: 110 ACGTGTCATCTCCTACTA 93
>miR6477 Score: 2.2 R03G_06138
Query: 1 TGAACAGTAGAGGATGAT 18
|:|*|||||:||||
Sbjct: 531 ATTTTTCATCTCTTACTG 514
>miR6477 Score: 0.0 R03G_06423
Query: 1 TGAACAGTAGAGGATGAT 18
|||||
Sbjct: 110 ACTTGTCATCTCCTACTA 93
>miR6477 Score: 0.0 R03G_06441
Query: 1 TGAACAGTAGAGGATGAT 18
|||||
Sbjct: 110 ACTTGTCATCTCCTACTA 93
>miR6477 Score: 2.2 R03G_06479
Query: 1 TGAACAGTAGAGGATGAT 18
:|||||:||*||:||
Sbjct: 4058 GCTTGTCGCTGCTGCTA 4041
>miR6477 Score: 1.8 R03G_04535
Query: 1 TGAACAGTAGAGGATGAT 18
:||*|||||*
Sbjct: 2036 GCTTATCATCTCCTACTC 2019
>miR6477 Score: 2.5 R03G_04659
Query: 1 TGAACAGTAGAGGATGAT 18
*|||||:|*|||||
Sbjct: 62 CCTTGTTGTCACCTACTA 45
>miR6477 Score: 2.5 R03G_05171
Query: 1 TGAACAGTAGAGGATGAT 18
|||||:||*|||:|*
Sbjct: 749 ACTTGTTATCGCCTATTC 732
>miR6477 Score: 0.0 R03G_05336
Query: 1 TGAACAGTAGAGGATGAT 18
|||||
Sbjct: 110 ACTTGTCATCTCCTACTA 93
>miR6477 Score: 2.5 R03G_05347
Query: 1 TGAACAGTAGAGGATGAT 18
*|||||:|*|||||
```

Sbjct: 101 CCTTGTTGTCACCTACTA 84  
>miR6477 Score: 2.5 R03G\_02228  
Query: 1 TGAACAGTAGAGGATGAT 18  
\*|||||:|\*|||||  
Sbjct: 101 CCTTGTTGTCACCTACTA 84  
>miR6477 Score: 2.5 R03G\_02407  
Query: 1 TGAACAGTAGAGGATGAT 18  
||||\*|||:|||||\*|  
Sbjct: 417 ACTTGCCATTTCTACTA-A 401  
>miR6477 Score: 0.0 R03G\_02689  
Query: 1 TGAACAGTAGAGGATGAT 18  
|||||||  
Sbjct: 110 ACTTGTCATCTCCTACTA 93  
>miR6477 Score: 2.5 R03G\_02817  
Query: 1 TGAACAGTAGAGGATGAT 18  
\*|||||:|\*|||||  
Sbjct: 101 CCTTGTTGTCACCTACTA 84  
>miR6477 Score: 0.0 R03G\_03109  
Query: 1 TGAACAGTAGAGGATGAT 18  
|||||||  
Sbjct: 110 ACTTGTCATCTCCTACTA 93  
>miR6477 Score: 1.0 R03G\_03571  
Query: 1 TGAACAGTAGAGGATGAT 18  
||\*|||||||  
Sbjct: 110 ACATGTCATCTCCTACTA 93  
>miR6477 Score: 0.0 R03G\_03615  
Query: 1 TGAACAGTAGAGGATGAT 18  
|||||||  
Sbjct: 110 ACTTGTCATCTCCTACTA 93  
>miR6477 Score: 2.5 R03G\_04211  
Query: 1 TGAACAGTAGAGGATGAT 18  
\*|||||:|\*|||||  
Sbjct: 101 CCTTGTTGTCACCTACTA 84  
>miR6477 Score: 2.5 R03G\_00513  
Query: 1 TGAACAGTAGAGGATGAT 18  
:|||||||:|||\*|:  
Sbjct: 5609 GCTTGTCATTTCTCTTG 5592  
>miR6477 Score: 0.0 R03G\_00681  
Query: 1 TGAACAGTAGAGGATGAT 18  
|||||||  
Sbjct: 110 ACTTGTCATCTCCTACTA 93  
>miR6477 Score: 1.0 R03G\_00999  
Query: 1 TGAACAGTAGAGGATGAT 18  
|||||||:|  
Sbjct: 1952 ACTTGTCATCTCCTGTTA 1935

>miR6477 Score: 2.5 R03G\_01108  
Query: 1 TGAACAGTAGAGGATGAT 18  
\*|\*||||:|||||||\*  
Sbjct: 377 CCATGTCGTCTCCTACTT 360

>miR6477 Score: 2.5 R03G\_01192  
Query: 1 TGAACAGTAGAGGATGAT 18  
\*|||||:|\*|||||||  
Sbjct: 101 CCTTGTTGTCACCTACTA 84

>miR6477 Score: 0.0 R03G\_01322  
Query: 1 TGAACAGTAGAGGATGAT 18  
|||||||  
Sbjct: 110 ACTTGTCATCTCCTACTA 93

>miR6477 Score: 1.0 R03G\_01612  
Query: 1 TGAACAGTAGAGGATGAT 18  
|||||||\*|||||||  
Sbjct: 110 ACTTGTCACCTCCTACTA 93

>miR6477 Score: 0.0 R03G\_01652  
Query: 1 TGAACAGTAGAGGATGAT 18  
|||||||  
Sbjct: 110 ACTTGTCATCTCCTACTA 93

>miR6477 Score: 2.5 R03G\_01717  
Query: 1 TGAACAGTAGAGGATGAT 18  
\*|||||:|\*|||||||  
Sbjct: 101 CCTTGTTGTCACCTACTA 84

>miR6477 Score: 2.5 R03G\_01726  
Query: 1 TGAACAGTAGAGGATGAT 18  
\*|||||:|\*|||||||  
Sbjct: 101 CCTTGTTGTCACCTACTA 84

>miR6477 Score: 1.0 R03G\_01730  
Query: 1 TGAACAGTAGAGGATGAT 18  
||\*|||||||  
Sbjct: 110 ACGTGTCATCTCCTACTA 93

>miR6477 Score: 2.5 R03G\_01780  
Query: 1 TGAACAGTAGAGGATGAT 18  
\*||\*||||:|||||||\*  
Sbjct: 696 CCTTTTCATTTCTACTC 679

>miR6477 Score: 1.8 R03G\_01902  
Query: 1 TGAACAGTAGAGGATGAT 18  
|||||||:|\*|||  
Sbjct: 371 ACTTGTCATCTTCTTCTG 354

>miR6477 Score: 0.0 R03G\_01956  
Query: 1 TGAACAGTAGAGGATGAT 18  
|||||||  
Sbjct: 110 ACTTGTCATCTCCTACTA 93

>miR6477 Score: 2.5 R03G\_17460

Query: 1 TGAACAGTAGAGGATGAT 18  
\*|||||:|\*|||||  
Sbjct: 101 CCTTGTTGTCACCTACTA 84  
>miR6477 Score: 2.5 R03G\_17433  
Query: 1 TGAACAGTAGAGGATGAT 18  
\*|||||:|\*|||||  
Sbjct: 101 CCTTGTTGTCACCTACTA 84  
>miR6477 Score: 0.0 R03G\_17382  
Query: 1 TGAACAGTAGAGGATGAT 18  
|||||  
Sbjct: 110 ACTTGTCATCTCCTACTA 93  
>miR6477 Score: 0.0 R03G\_17285  
Query: 1 TGAACAGTAGAGGATGAT 18  
|||||  
Sbjct: 110 ACTTGTCATCTCCTACTA 93  
>miR7734-3p Score: 1.0 R03G\_17257  
Query: 1 TGGAACCAGTCCACATTCAACG 22  
|||||:|||||\*|  
Sbjct: 584 ACCTTGGTTAGGTGTAAGTTAC 563  
>miR7734-3p Score: 2.5 R03G\_17240  
Query: 1 TGGAACCAGTCCACATTCAACG 22  
||:||||:|\*|||||\*|  
Sbjct: 596 ACTTTGGTTAGTTGTAAGTTAC 575  
>miR7734-3p Score: 2.5 R03G\_17212  
Query: 1 TGGAACCAGTCCACATTCAACG 22  
||:||||:|\*|||||\*|  
Sbjct: 584 ACTTTGGTTAGTTGTAAGTTAC 563  
>miR7734-3p Score: 0.0 R03G\_16827  
Query: 1 TGGAACCAGTCCACATTCAACG 22  
|||||  
Sbjct: 668 ACCTTGGTCAGGTGTAAGTTGC 647  
>miR7734-3p Score: 2.0 R03G\_16739  
Query: 1 TGGAACCAGTCCACATTCAACG 22  
||:||||:|\*|||||  
Sbjct: 887 ACTTTGGTTAGCTGTAAGTTGC 866  
>miR7734-3p Score: 0.0 R03G\_16749  
Query: 1 TGGAACCAGTCCACATTCAACG 22  
|||||  
Sbjct: 668 ACCTTGGTCAGGTGTAAGTTGC 647  
>miR7734-3p Score: 1.0 R03G\_16136  
Query: 1 TGGAACCAGTCCACATTCAACG 22  
|||||:|||||\*|  
Sbjct: 584 ACCTTGGTTAGGTGTAAGTTAC 563  
>miR7734-3p Score: 2.5 R03G\_16138  
Query: 1 TGGAACCAGTCCACATTCAACG 22

||:||||:|\*||||\*|||  
Sbjct: 887 ACTTTGGTTAGCTGTAAATTGC 866  
>miR7734-3p Score: 1.0 R03G\_15889  
Query: 1 TGGAACCAGTCCACATTCAACG 22  
|||||||:|||||||\*|  
Sbjct: 584 ACCTTGGTTAGGTGTAAGTTAC 563  
>miR7734-3p Score: 0.0 R03G\_15898  
Query: 1 TGGAACCAGTCCACATTCAACG 22  
|||||||  
Sbjct: 668 ACCTTGGTCAGGTGTAAGTTGC 647  
>miR7734-3p Score: 2.5 R03G\_15580  
Query: 1 TGGAACCAGTCCACATTCAACG 22  
||:||||:|\*||||||\*|  
Sbjct: 851 ACTTTGGTTAGCTGTAAGTTTC 830  
>miR7734-3p Score: 1.0 R03G\_14991  
Query: 1 TGGAACCAGTCCACATTCAACG 22  
|||||||:|||||||\*|  
Sbjct: 29 ACCTTGGTTAGGTGTAAGTTAC 8  
>miR7734-3p Score: 0.0 R03G\_14550  
Query: 1 TGGAACCAGTCCACATTCAACG 22  
|||||||  
Sbjct: 668 ACCTTGGTCAGGTGTAAGTTGC 647  
>miR7734-3p Score: 2.5 R03G\_14626  
Query: 1 TGGAACCAGTCCACATTCAACG 22  
||:||||:|\*||||||\*|  
Sbjct: 887 ACTTTGGTTAGCTGTAAGTTTC 866  
>miR7734-3p Score: 2.0 R03G\_14710  
Query: 1 TGGAACCAGTCCACATTCAACG 22  
||:||||:|\*|||||||  
Sbjct: 887 ACTTTGGTTAGCTGTAAGTTGC 866  
>miR7734-3p Score: 2.5 R03G\_13866  
Query: 1 TGGAACCAGTCCACATTCAACG 22  
||:||||:|\*|||||||\*|  
Sbjct: 719 ACTTTGGTTAGCTGTAAGTTTC 698  
>miR7734-3p Score: 2.0 R03G\_13747  
Query: 1 TGGAACCAGTCCACATTCAACG 22  
||:||||:|\*|||||||  
Sbjct: 887 ACTTTGGTTAGCTGTAAGTTGC 866  
>miR7734-3p Score: 0.0 R03G\_13145  
Query: 1 TGGAACCAGTCCACATTCAACG 22  
|||||||  
Sbjct: 668 ACCTTGGTCAGGTGTAAGTTGC 647  
>miR7734-3p Score: 2.5 R03G\_13148  
Query: 1 TGGAACCAGTCCACATTCAACG 22  
||:||||:|\*|||||||\*|



Sbjct: 620 ACTTTGGTTAGCTGTAAGTTTC 599  
>miR7734-3p Score: 0.0 R03G\_13273  
Query: 1 TGGAACCAGTCCACATTCAACG 22  
|||||  
Sbjct: 668 ACCTTGGTCAGGTGTAAGTTGC 647  
>miR7734-3p Score: 0.0 R03G\_11969  
Query: 1 TGGAACCAGTCCACATTCAACG 22  
|||||  
Sbjct: 668 ACCTTGGTCAGGTGTAAGTTGC 647  
>miR7734-3p Score: 2.0 R03G\_12009  
Query: 1 TGGAACCAGTCCACATTCAACG 22  
||:|||||:||\*|||||  
Sbjct: 887 ACTTTGGTTAGCTGTAAGTTGC 866  
>miR7734-3p Score: 2.0 R03G\_12072  
Query: 1 TGGAACCAGTCCACATTCAACG 22  
||:|||||:||\*|||||  
Sbjct: 887 ACTTTGGTTAGCTGTAAGTTGC 866  
>miR7734-3p Score: 2.5 R03G\_12169  
Query: 1 TGGAACCAGTCCACATTCAACG 22  
||:|||||:||\*|||||\*|  
Sbjct: 887 ACTTTGGTTAGCTGTAAGTTTC 866  
>miR7734-3p Score: 0.0 R03G\_11237  
Query: 1 TGGAACCAGTCCACATTCAACG 22  
|||||  
Sbjct: 668 ACCTTGGTCAGGTGTAAGTTGC 647  
>miR7734-3p Score: 2.5 R03G\_11404  
Query: 1 TGGAACCAGTCCACATTCAACG 22  
||:|||||:||\*|||||\*|  
Sbjct: 887 ACTTTGGTTAGCTGTAAGTTAC 866  
>miR7734-3p Score: 0.0 R03G\_11409  
Query: 1 TGGAACCAGTCCACATTCAACG 22  
|||||  
Sbjct: 668 ACCTTGGTCAGGTGTAAGTTGC 647  
>miR7734-3p Score: 2.5 R03G\_11531  
Query: 1 TGGAACCAGTCCACATTCAACG 22  
||:|||||:||\*|||||\*|  
Sbjct: 380 ACTTTGGTTAGCTGTAAGTTTC 359  
>miR7734-3p Score: 0.0 R03G\_11538  
Query: 1 TGGAACCAGTCCACATTCAACG 22  
|||||  
Sbjct: 668 ACCTTGGTCAGGTGTAAGTTGC 647  
>miR7734-3p Score: 2.5 R03G\_11542  
Query: 1 TGGAACCAGTCCACATTCAACG 22  
||:|||||:||\*|||||\*|  
Sbjct: 584 ACTTTGGTTAGTTGTAAGTTAC 563

>miR7734-3p Score: 2.5 R03G\_11771  
Query: 1 TGGAACCAGTCCACATTCAACG 22  
||:|||||:|\*|||||||\*|  
Sbjct: 887 ACTTTGGTTAGCTGTAAGTTTC 866

>miR7734-3p Score: 1.0 R03G\_11949  
Query: 1 TGGAACCAGTCCACATTCAACG 22  
|||||||:|||||||\*|  
Sbjct: 29 ACCTTGGTTAGGTGTAAGTTAC 8

>miR7734-3p Score: 2.5 R03G\_10522  
Query: 1 TGGAACCAGTCCACATTCAACG 22  
||:|||||:|\*|||||||\*|  
Sbjct: 851 ACTTTGGTTAGCTGTAAGTTTC 830

>miR7734-3p Score: 2.0 R03G\_10725  
Query: 1 TGGAACCAGTCCACATTCAACG 22  
||:|||||:|\*|||||||  
Sbjct: 851 ACTTTGGTTAGCTGTAAGTTGC 830

>miR7734-3p Score: 1.0 R03G\_10735  
Query: 1 TGGAACCAGTCCACATTCAACG 22  
|||||||:|||||||\*|  
Sbjct: 113 ACCTTGGTTAGGTGTAAGTTAC 92

>miR7734-3p Score: 2.0 R03G\_09192  
Query: 1 TGGAACCAGTCCACATTCAACG 22  
||:|||||:|\*|||||||  
Sbjct: 887 ACTTTGGTTAGCTGTAAGTTGC 866

>miR7734-3p Score: 0.0 R03G\_09601  
Query: 1 TGGAACCAGTCCACATTCAACG 22  
|||||||  
Sbjct: 668 ACCTTGGTCAGGTGTAAGTTGC 647

>miR7734-3p Score: 0.0 R03G\_09930  
Query: 1 TGGAACCAGTCCACATTCAACG 22  
|||||||  
Sbjct: 668 ACCTTGGTCAGGTGTAAGTTGC 647

>miR7734-3p Score: 2.0 R03G\_09940  
Query: 1 TGGAACCAGTCCACATTCAACG 22  
||:|||||:|\*|||||||  
Sbjct: 887 ACTTTGGTTAGCTGTAAGTTGC 866

>miR7734-3p Score: 1.0 R03G\_10039  
Query: 1 TGGAACCAGTCCACATTCAACG 22  
|||||||:|||||||\*|  
Sbjct: 584 ACCTTGGTTAGGTGTAAGTTAC 563

>miR7734-3p Score: 0.0 R03G\_10217  
Query: 1 TGGAACCAGTCCACATTCAACG 22  
|||||||  
Sbjct: 668 ACCTTGGTCAGGTGTAAGTTGC 647

>miR7734-3p Score: 0.0 R03G\_07980

Query: 1 TGGAACCAGTCCACATTCAACG 22  
|||||  
Sbjct: 56 ACCTTGGTCAGGTGTAAGTTGC 35  
>miR7734-3p Score: 2.0 R03G\_08042

Query: 1 TGGAACCAGTCCACATTCAACG 22  
||:|||||:||\*|||||  
Sbjct: 419 ACTTTGGTTAGCTGTAAGTTGC 398  
>miR7734-3p Score: 0.0 R03G\_06731

Query: 1 TGGAACCAGTCCACATTCAACG 22  
|||||  
Sbjct: 668 ACCTTGGTCAGGTGTAAGTTGC 647  
>miR7734-3p Score: 2.0 R03G\_07130

Query: 1 TGGAACCAGTCCACATTCAACG 22  
||:|||||:||\*|||||  
Sbjct: 791 ACTTTGGTTAGCTGTAAGTTGC 770  
>miR7734-3p Score: 2.0 R03G\_07294

Query: 1 TGGAACCAGTCCACATTCAACG 22  
||:|||||:||\*|||||  
Sbjct: 488 ACTTTGGTTAGCTGTAAGTTGC 467  
>miR7734-3p Score: 0.0 R03G\_07307

Query: 1 TGGAACCAGTCCACATTCAACG 22  
|||||  
Sbjct: 668 ACCTTGGTCAGGTGTAAGTTGC 647  
>miR7734-3p Score: 2.0 R03G\_07686

Query: 1 TGGAACCAGTCCACATTCAACG 22  
||:|||||:||\*|||||  
Sbjct: 887 ACTTTGGTTAGCTGTAAGTTGC 866  
>miR7734-3p Score: 2.5 R03G\_07693

Query: 1 TGGAACCAGTCCACATTCAACG 22  
||:|||||:||\*|||||\*|  
Sbjct: 749 ACTTTGGTTAGTTGTAAGTTAC 728  
>miR7734-3p Score: 0.0 R03G\_07698

Query: 1 TGGAACCAGTCCACATTCAACG 22  
|||||  
Sbjct: 668 ACCTTGGTCAGGTGTAAGTTGC 647  
>miR7734-3p Score: 0.0 R03G\_07721

Query: 1 TGGAACCAGTCCACATTCAACG 22  
|||||  
Sbjct: 668 ACCTTGGTCAGGTGTAAGTTGC 647  
>miR7734-3p Score: 0.0 R03G\_07737

Query: 1 TGGAACCAGTCCACATTCAACG 22  
|||||  
Sbjct: 29 ACCTTGGTCAGGTGTAAGTTGC 8  
>miR7734-3p Score: 2.0 R03G\_07976

Query: 1 TGGAACCAGTCCACATTCAACG 22

||:||||:|\*|||||||  
Sbjct: 884 ACTTTGGTTAGCTGTAAGTTGC 863  
>miR7734-3p Score: 2.0 R03G\_05631  
Query: 1 TGGAACCAGTCCACATTCAACG 22  
||:||||:|\*|||||||  
Sbjct: 887 ACTTTGGTTAGCTGTAAGTTGC 866  
>miR7734-3p Score: 2.5 R03G\_05958  
Query: 1 TGGAACCAGTCCACATTCAACG 22  
||:||||:|\*|||||||\*|  
Sbjct: 851 ACTTTGGTTAGCTGTAAGTTTC 830  
>miR7734-3p Score: 2.5 R03G\_06430  
Query: 1 TGGAACCAGTCCACATTCAACG 22  
||:||||:|\*|||||||\*|  
Sbjct: 851 ACTTTGGTTAGCTGTAAGTTTC 830  
>miR7734-3p Score: 0.0 R03G\_04683  
Query: 1 TGGAACCAGTCCACATTCAACG 22  
|||||||:|||||||  
Sbjct: 668 ACCTTGGTCAGGTGTAAGTTGC 647  
>miR7734-3p Score: 2.5 R03G\_04785  
Query: 1 TGGAACCAGTCCACATTCAACG 22  
||:||||:|\*|||||||\*|  
Sbjct: 851 ACTTTGGTTAGCTGTAAGTTTC 830  
>miR7734-3p Score: 1.0 R03G\_05424  
Query: 1 TGGAACCAGTCCACATTCAACG 22  
|||||||:|||||||\*|  
Sbjct: 584 ACCTTGGTTAGGTGTAAGTTAC 563  
>miR7734-3p Score: 1.0 R03G\_02828  
Query: 1 TGGAACCAGTCCACATTCAACG 22  
|||||||:|||||||\*|  
Sbjct: 584 ACCTTGGTTAGGTGTAAGTTAC 563  
>miR7734-3p Score: 2.5 R03G\_03555  
Query: 1 TGGAACCAGTCCACATTCAACG 22  
||:||||:|\*|||||||\*|  
Sbjct: 887 ACTTTGGTTAGCTGTAAGTTTC 866  
>miR7734-3p Score: 2.0 R03G\_03580  
Query: 1 TGGAACCAGTCCACATTCAACG 22  
||:||||:|\*|||||||  
Sbjct: 812 ACTTTGGTTAGCTGTAAGTTGC 791  
>miR7734-3p Score: 2.5 R03G\_03589  
Query: 1 TGGAACCAGTCCACATTCAACG 22  
||:||||:|\*|||||||\*|  
Sbjct: 812 ACTTTGGTTAGCTGTAAGTTTC 791  
>miR7734-3p Score: 0.0 R03G\_04212  
Query: 1 TGGAACCAGTCCACATTCAACG 22  
|||||||:|||||||

Sbjct: 668 ACCTTGGTCAGGTGTAAGTTGC 647  
>miR7734-3p Score: 1.0 R03G\_00291  
Query: 1 TGGAACCAGTCCACATTCAACG 22  
|||||||:|||||||\*|  
Sbjct: 584 ACCTTGGTTAGGTGTAAGTTAC 563  
>miR7734-3p Score: 2.0 R03G\_00693  
Query: 1 TGGAACCAGTCCACATTCAACG 22  
||:|||||:||\*|||||||  
Sbjct: 365 ACTTTGGTTAGCTGTAAGTTGC 344  
>miR7734-3p Score: 2.5 R03G\_01207  
Query: 1 TGGAACCAGTCCACATTCAACG 22  
||:|||||:||\*|||||||\*|  
Sbjct: 821 ACTTTGGTTAGCTGTAAGTTTC 800  
>miR7734-3p Score: 2.5 R03G\_01309  
Query: 1 TGGAACCAGTCCACATTCAACG 22  
||:|||||:||\*|||||||\*|  
Sbjct: 836 ACTTTGGTTAGCTGTAAGTTTC 815  
>miR7734-3p Score: 0.0 R03G\_01728  
Query: 1 TGGAACCAGTCCACATTCAACG 22  
|||||||  
Sbjct: 626 ACCTTGGTCAGGTGTAAGTTGC 605  
>miR7734-3p Score: 2.5 R03G\_01740  
Query: 1 TGGAACCAGTCCACATTCAACG 22  
||:|||||:||\*|||||||\*|  
Sbjct: 851 ACTTTGGTTAGCTGTAAGTTTC 830  
>miR7734-3p Score: 2.0 R03G\_17441  
Query: 1 TGGAACCAGTCCACATTCAACG 22  
||:|||||:||\*|||||||  
Sbjct: 614 ACTTTGGTTAGCTGTAAGTTGC 593  
>miR7734-3p Score: 2.0 R03G\_17385  
Query: 1 TGGAACCAGTCCACATTCAACG 22  
||:|||||:||\*|||||||  
Sbjct: 887 ACTTTGGTTAGCTGTAAGTTGC 866  
>miR7734-3p Score: 2.0 R03G\_17358  
Query: 1 TGGAACCAGTCCACATTCAACG 22  
||:|||||:||\*|||||||  
Sbjct: 887 ACTTTGGTTAGCTGTAAGTTGC 866  
>miR9476-5p Score: 2.2 R03G\_14596  
Query: 1 TCTAGTCTTGCCTACTTTTTTTT-TT 23  
||:|||||||:||||||:|\*\*|  
Sbjct: 140 AGGTCAGAACGGGTGAAAAGATCA 117  
>miR9476-5p Score: 2.5 R03G\_12740  
Query: 1 TCTAGTCTTGCCTACTTTTTTTT 23  
:|:\*|||||||:|\*  
Sbjct: 444 GGGCCAGAACGGATGAAAAAGAC 422

>miR9476-5p Score: 2.0 R03G\_09279  
Query: 1 TCTAGTCTTGCCTACTTTTTTTT 23  
||:|||||||:||||:|||||\*  
Sbjct: 527 AGGTCAGAACGGGTGAGAAAAAC 505

>miR3476-5p Score: 0.5 R03G\_17256  
Query: 1 TGAAGTGGGTGCTGCTGCTGC 21  
|||||||:|||||||  
Sbjct: 374 ACTTGACCTACGACGACGACG 354

>miR3476-5p Score: 0.5 R03G\_17248  
Query: 1 TGAAGTGGGTGCTGCTGCTGC 21  
|||||||:|||||||  
Sbjct: 377 ACTTGACCTACGACGACGACG 357

>miR3476-5p Score: 0.0 R03G\_16748  
Query: 1 TGAAGTGGGTGCTGCTGCTGC 21  
|||||||:|||||||  
Sbjct: 347 ACTTGACCCACGACGACGACG 327

>miR3476-5p Score: 0.5 R03G\_16137  
Query: 1 TGAAGTGGGTGCTGCTGCTGC 21  
|||||||:|||||||  
Sbjct: 371 ACTTGACCTACGACGACGACG 351

>miR3476-5p Score: 0.5 R03G\_15890  
Query: 1 TGAAGTGGGTGCTGCTGCTGC 21  
|||||||:|||||||  
Sbjct: 377 ACTTGACCTACGACGACGACG 357

>miR3476-5p Score: 0.0 R03G\_15897  
Query: 1 TGAAGTGGGTGCTGCTGCTGC 21  
|||||||:|||||||  
Sbjct: 347 ACTTGACCCACGACGACGACG 327

>miR3476-5p Score: 0.5 R03G\_15147  
Query: 1 TGAAGTGGGTGCTGCTGCTGC 21  
|||||||:|||||||  
Sbjct: 341 ACTTGACCTACGACGACGACG 321

>miR3476-5p Score: 0.0 R03G\_14551  
Query: 1 TGAAGTGGGTGCTGCTGCTGC 21  
|||||||:|||||||  
Sbjct: 347 ACTTGACCCACGACGACGACG 327

>miR3476-5p Score: 2.5 R03G\_13627  
Query: 1 TGAAGTGGGTGCTGCTGCTGC 21  
:|\*|||||||:|||\*:||  
Sbjct: 393 GCCTGACCCACGATGACCGCG 373

>miR3476-5p Score: 0.5 R03G\_13146  
Query: 1 TGAAGTGGGTGCTGCTGCTGC 21  
|||||||:|||||||  
Sbjct: 377 ACTTGACCTACGACGACGACG 357

>miR3476-5p Score: 0.0 R03G\_11977

Query: 1 TGAAGTGGGTGCTGCTGCTGC 21  
|||||  
Sbjct: 311 ACTTGACCCACGACGACGACG 291  
>miR3476-5p Score: 0.0 R03G\_11236  
Query: 1 TGAAGTGGGTGCTGCTGCTGC 21  
|||||  
Sbjct: 389 ACTTGACCCACGACGACGACG 369  
>miR3476-5p Score: 0.0 R03G\_11537  
Query: 1 TGAAGTGGGTGCTGCTGCTGC 21  
|||||  
Sbjct: 389 ACTTGACCCACGACGACGACG 369  
>miR3476-5p Score: 2.5 R03G\_10502  
Query: 1 TGAAGTGGGTGCTGCTGCTGC 21  
|||\*:::|||||  
Sbjct: 231 ACTTTGTTCACGACGACGACG 211  
>miR3476-5p Score: 2.0 R03G\_10775  
Query: 1 TGAAGTGGGTGCTGCTGCTGC 21  
|||||:||||\*||\*|||  
Sbjct: 375 ACTTGACCTACGAAGACAACG 355  
>miR3476-5p Score: 1.0 R03G\_09497  
Query: 1 TGAAGTGGGTGCTGCTGCTGC 21  
|||||:|||||\*|||  
Sbjct: 86 ACTTGACCTACGACGACAACG 66  
>miR3476-5p Score: 0.0 R03G\_09602  
Query: 1 TGAAGTGGGTGCTGCTGCTGC 21  
|||||  
Sbjct: 347 ACTTGACCCACGACGACGACG 327  
>miR3476-5p Score: 0.0 R03G\_09603  
Query: 1 TGAAGTGGGTGCTGCTGCTGC 21  
|||||  
Sbjct: 389 ACTTGACCCACGACGACGACG 369  
>miR3476-5p Score: 0.0 R03G\_09929  
Query: 1 TGAAGTGGGTGCTGCTGCTGC 21  
|||||  
Sbjct: 347 ACTTGACCCACGACGACGACG 327  
>miR3476-5p Score: 0.5 R03G\_10041  
Query: 1 TGAAGTGGGTGCTGCTGCTGC 21  
|||||:|||||  
Sbjct: 377 ACTTGACCTACGACGACGACG 357  
>miR3476-5p Score: 0.0 R03G\_10218  
Query: 1 TGAAGTGGGTGCTGCTGCTGC 21  
|||||  
Sbjct: 368 ACTTGACCCACGACGACGACG 348  
>miR3476-5p Score: 0.0 R03G\_07981  
Query: 1 TGAAGTGGGTGCTGCTGCTGC 21

|||||  
Sbjct: 347 ACTTGACCCACGACGACGACG 327  
>miR3476-5p Score: 0.5 R03G\_09182  
Query: 1 TGAAGTGGGTGCTGCTGCTGC 21  
|||||:|||||  
Sbjct: 353 ACTTGACCTACGACGACGACG 333  
>miR3476-5p Score: 0.0 R03G\_06730  
Query: 1 TGAAGTGGGTGCTGCTGCTGC 21  
|||||  
Sbjct: 347 ACTTGACCCACGACGACGACG 327  
>miR3476-5p Score: 0.0 R03G\_07306  
Query: 1 TGAAGTGGGTGCTGCTGCTGC 21  
|||||  
Sbjct: 347 ACTTGACCCACGACGACGACG 327  
>miR3476-5p Score: 0.0 R03G\_07696  
Query: 1 TGAAGTGGGTGCTGCTGCTGC 21  
|||||  
Sbjct: 347 ACTTGACCCACGACGACGACG 327  
>miR3476-5p Score: 0.0 R03G\_07720  
Query: 1 TGAAGTGGGTGCTGCTGCTGC 21  
|||||  
Sbjct: 347 ACTTGACCCACGACGACGACG 327  
>miR3476-5p Score: 0.0 R03G\_07738  
Query: 1 TGAAGTGGGTGCTGCTGCTGC 21  
|||||  
Sbjct: 398 ACTTGACCCACGACGACGACG 378  
>miR3476-5p Score: 0.0 R03G\_04679  
Query: 1 TGAAGTGGGTGCTGCTGCTGC 21  
|||||  
Sbjct: 317 ACTTGACCCACGACGACGACG 297  
>miR3476-5p Score: 1.5 R03G\_05425  
Query: 1 TGAAGTGGGTGCTGCTGCTGC 21  
|||||:||||\*|||||  
Sbjct: 374 ACTTGACCTACGAAGACGACG 354  
>miR3476-5p Score: 0.0 R03G\_02228  
Query: 1 TGAAGTGGGTGCTGCTGCTGC 21  
|||||  
Sbjct: 347 ACTTGACCCACGACGACGACG 327  
>miR3476-5p Score: 2.5 R03G\_03439  
Query: 1 TGAAGTGGGTGCTGCTGCTGC 21  
|||||:||||\*||\*\*  
Sbjct: 537 ACTTGACCCATGACGAAGAAA 517  
>miR3476-5p Score: 0.5 R03G\_03584  
Query: 1 TGAAGTGGGTGCTGCTGCTGC 21  
|||||:|||||



Sbjct: 305 ACTTGACCTACGACGACGACG 285  
>miR3476-5p Score: 2.2 R03G\_03734  
Query: 1 TGAAGTGGGTGCTGCTGCTGC 21  
|||\*|||||||:||||:\*

Sbjct: 286 ACTAGACCCACGATGACGGGG 266  
>miR3476-5p Score: 0.0 R03G\_04211  
Query: 1 TGAAGTGGGTGCTGCTGCTGC 21  
|||||||

Sbjct: 347 ACTTGACCCACGACGACGACG 327  
>miR3476-5p Score: 0.5 R03G\_00288  
Query: 1 TGAAGTGGGTGCTGCTGCTGC 21  
|||||||:|||||||

Sbjct: 368 ACTTGACCTACGACGACGACG 348  
>miR3476-5p Score: 0.0 R03G\_01726  
Query: 1 TGAAGTGGGTGCTGCTGCTGC 21  
|||||||

Sbjct: 392 ACTTGACCCACGACGACGACG 372  
>miR3476-5p Score: 0.5 R03G\_17350  
Query: 1 TGAAGTGGGTGCTGCTGCTGC 21  
|||||||:|||||||

Sbjct: 371 ACTTGACCTACGACGACGACG 351  
>miR8137 Score: 0.5 R03G\_17257  
Query: 1 TATCGCAACCAGTTCACAAAAT 22  
||:|||||||

Sbjct: 1424 ATGGCGTTGGTCAAGTGTTTTA 1403  
>miR8137 Score: 0.5 R03G\_16136  
Query: 1 TATCGCAACCAGTTCACAAAAT 22  
||:|||||||

Sbjct: 1424 ATGGCGTTGGTCAAGTGTTTTA 1403  
>miR8137 Score: 0.5 R03G\_15889  
Query: 1 TATCGCAACCAGTTCACAAAAT 22  
||:|||||||

Sbjct: 1424 ATGGCGTTGGTCAAGTGTTTTA 1403  
>miR8137 Score: 0.5 R03G\_11949  
Query: 1 TATCGCAACCAGTTCACAAAAT 22  
||:|||||||

Sbjct: 869 ATGGCGTTGGTCAAGTGTTTTA 848  
>miR8137 Score: 0.5 R03G\_10735  
Query: 1 TATCGCAACCAGTTCACAAAAT 22  
||:|||||||

Sbjct: 953 ATGGCGTTGGTCAAGTGTTTTA 932  
>miR8137 Score: 0.5 R03G\_10040  
Query: 1 TATCGCAACCAGTTCACAAAAT 22  
||:|||||||

Sbjct: 98 ATGGCGTTGGTCAAGTGTTTTA 77

>miR8137 Score: 0.5 R03G\_09183  
Query: 1 TATCGCAACCAGTTCACAAAAT 22  
||:||||||||||||||||||  
Sbjct: 641 ATGGCGTTGGTCAAGTGTTTTA 620

>miR8137 Score: 2.5 R03G\_06782  
Query: 1 TATCGCAACCAGTTCACAAAAT 22  
\*||||||||||||||\*|\*|\*|  
Sbjct: 143 TTAGCGTTGGTCAAGT-TGTGA 123

>miR8137 Score: 0.5 R03G\_05424  
Query: 1 TATCGCAACCAGTTCACAAAAT 22  
||:||||||||||||||||||  
Sbjct: 1424 ATGGCGTTGGTCAAGTGTTTTA 1403

>miR8137 Score: 0.0 R03G\_03585  
Query: 1 TATCGCAACCAGTTCACAAAAT 22  
||||||||||||||||||  
Sbjct: 98 ATAGCGTTGGTCAAGTGTTTTA 77

>miR8137 Score: 0.5 R03G\_00289  
Query: 1 TATCGCAACCAGTTCACAAAAT 22  
||:||||||||||||||||||  
Sbjct: 236 ATGGCGTTGGTCAAGTGTTTTA 215

>miR8137 Score: 0.5 R03G\_17351  
Query: 1 TATCGCAACCAGTTCACAAAAT 22  
||:||||||||||||||||||  
Sbjct: 236 ATGGCGTTGGTCAAGTGTTTTA 215

>miR8571 Score: 0.0 R03G\_16560  
Query: 1 TTCATCGTCAAGATCCTGTTCT 22  
||||||||||||||||||  
Sbjct: 534 AAGTAGCAGTTCTAGGACAAGA 513

>miR8571 Score: 0.0 R03G\_16557  
Query: 1 TTCATCGTCAAGATCCTGTTCT 22  
||||||||||||||||||  
Sbjct: 1464 AAGTAGCAGTTCTAGGACAAGA 1443

>miR8571 Score: 0.0 R03G\_16132  
Query: 1 TTCATCGTCAAGATCCTGTTCT 22  
||||||||||||||||||  
Sbjct: 1464 AAGTAGCAGTTCTAGGACAAGA 1443

>miR8571 Score: 2.5 R03G\_14835  
Query: 1 TTCATCGTCAAGATCCTGTTCT 22  
\*||||||||||\*|||||\*|\*|  
Sbjct: 459 TAGTAGCAGTTGTAGGACTA-A 439

>miR8571 Score: 1.5 R03G\_14926  
Query: 1 TTCATCGTCAAGATCCTGTTCT 22  
|||||:||||:||||\*||||  
Sbjct: 51 AAGTAGTAGTTTTAGGA-AAGA 31

>miR8571 Score: 0.0 R03G\_14995

Query: 1 TTCATCGTCAAGATCCTGTTCT 22  
|||||  
Sbjct: 1464 AAGTAGCAGTTCTAGGACAAGA 1443  
>miR8571 Score: 0.0 R03G\_15134  
Query: 1 TTCATCGTCAAGATCCTGTTCT 22  
|||||  
Sbjct: 1506 AAGTAGCAGTTCTAGGACAAGA 1485  
>miR8571 Score: 2.5 R03G\_13437  
Query: 1 TTCATCGTCAAGATCCTGTTCT 22  
|||||\*|||:||||\*|\*|  
Sbjct: 231 AAGTAGAAGTTCTGGGACTAAA 210  
>miR8571 Score: 0.0 R03G\_12470  
Query: 1 TTCATCGTCAAGATCCTGTTCT 22  
|||||  
Sbjct: 1464 AAGTAGCAGTTCTAGGACAAGA 1443  
>miR8571 Score: 0.0 R03G\_11524  
Query: 1 TTCATCGTCAAGATCCTGTTCT 22  
|||||  
Sbjct: 531 AAGTAGCAGTTCTAGGACAAGA 510  
>miR8571 Score: 0.0 R03G\_09540  
Query: 1 TTCATCGTCAAGATCCTGTTCT 22  
|||||  
Sbjct: 672 AAGTAGCAGTTCTAGGACAAGA 651  
>miR8571 Score: 0.0 R03G\_07098  
Query: 1 TTCATCGTCAAGATCCTGTTCT 22  
|||||  
Sbjct: 1464 AAGTAGCAGTTCTAGGACAAGA 1443  
>miR8571 Score: 0.0 R03G\_06442  
Query: 1 TTCATCGTCAAGATCCTGTTCT 22  
|||||  
Sbjct: 7188 AAGTAGCAGTTCTAGGACAAGA 7167  
>miR8571 Score: 0.0 R03G\_05271  
Query: 1 TTCATCGTCAAGATCCTGTTCT 22  
|||||  
Sbjct: 1464 AAGTAGCAGTTCTAGGACAAGA 1443  
>miR8571 Score: 0.0 R03G\_02699  
Query: 1 TTCATCGTCAAGATCCTGTTCT 22  
|||||  
Sbjct: 261 AAGTAGCAGTTCTAGGACAAGA 240  
>miR8571 Score: 0.0 R03G\_03098  
Query: 1 TTCATCGTCAAGATCCTGTTCT 22  
|||||  
Sbjct: 672 AAGTAGCAGTTCTAGGACAAGA 651  
>miR8571 Score: 0.0 R03G\_00290  
Query: 1 TTCATCGTCAAGATCCTGTTCT 22

```
|||||
Sbjct: 1464 AAGTAGCAGTTCTAGGACAAGA 1443
>miR8571 Score: 0.0 R03G_00486
Query: 1 TTCATCGTCAAGATCCTGTTCT 22
|||||
Sbjct: 261 AAGTAGCAGTTCTAGGACAAGA 240
>miR8571 Score: 0.0 R03G_01745
Query: 1 TTCATCGTCAAGATCCTGTTCT 22
|||||
Sbjct: 1464 AAGTAGCAGTTCTAGGACAAGA 1443
>miR8571 Score: 0.0 R03G_01928
Query: 1 TTCATCGTCAAGATCCTGTTCT 22
|||||
Sbjct: 1464 AAGTAGCAGTTCTAGGACAAGA 1443
>miR8571 Score: 0.0 R03G_17438
Query: 1 TTCATCGTCAAGATCCTGTTCT 22
|||||
Sbjct: 996 AAGTAGCAGTTCTAGGACAAGA 975
>miR7719-5p Score: 0.5 R03G_17249
Query: 1 TCCTCCATAAGCATGTTTCTTC 22
|||||*
Sbjct: 546 AGGAGGTATTCGTACAAAGAAA 525
>miR7719-5p Score: 0.0 R03G_14979
Query: 1 TCCTCCATAAGCATGTTTCTTC 22
|||||
Sbjct: 546 AGGAGGTATTCGTACAAAGAAG 525
>miR7719-5p Score: 0.0 R03G_14363
Query: 1 TCCTCCATAAGCATGTTTCTTC 22
|||||
Sbjct: 504 AGGAGGTATTCGTACAAAGAAG 483
>miR7719-5p Score: 0.5 R03G_13741
Query: 1 TCCTCCATAAGCATGTTTCTTC 22
|||||:|||||
Sbjct: 546 AGGAGGTATTCGTGCAAAGAAG 525
>miR7719-5p Score: 0.0 R03G_13755
Query: 1 TCCTCCATAAGCATGTTTCTTC 22
|||||
Sbjct: 546 AGGAGGTATTCGTACAAAGAAG 525
>miR7719-5p Score: 0.0 R03G_13863
Query: 1 TCCTCCATAAGCATGTTTCTTC 22
|||||
Sbjct: 246 AGGAGGTATTCGTACAAAGAAG 225
>miR7719-5p Score: 0.0 R03G_13270
Query: 1 TCCTCCATAAGCATGTTTCTTC 22
|||||
```

Sbjct: 546 AGGAGGTATTCGTACAAAGAAG 525  
>miR7719-5p Score: 0.0 R03G\_10774  
Query: 1 TCCTCCATAAGCATGTTTCTTC 22  
|||||

Sbjct: 513 AGGAGGTATTCGTACAAAGAAG 492  
>miR7719-5p Score: 0.0 R03G\_08849  
Query: 1 TCCTCCATAAGCATGTTTCTTC 22  
|||||

Sbjct: 546 AGGAGGTATTCGTACAAAGAAG 525  
>miR7719-5p Score: 1.0 R03G\_05936  
Query: 1 TCCTCCATAAGCATGTTTCTTC 22  
|\*|||||

Sbjct: 546 ACGAGGTATTCGTACAAAGAAG 525  
>miR7719-5p Score: 1.0 R03G\_05420  
Query: 1 TCCTCCATAAGCATGTTTCTTC 22  
|\*|||||

Sbjct: 407 ACGAGGTATTCGTACAAAGAAG 386  
>miR7719-5p Score: 0.2 R03G\_17276  
Query: 1 TCCTCCATAAGCATGTTTCTTC 22  
|||||:|

Sbjct: 636 AGGAGGTATTCGTACAAAGGAG 615  
>miR5177 Score: 2.5 R03G\_16800  
Query: 1 TGAGGTTGGAAAACGAGCAG 20  
|||||:||||\*\*|||||

Sbjct: 1215 ACTCCAGCCTTCCGCTCGTC 1196  
>miR5177 Score: 2.5 R03G\_15748  
Query: 1 TGAGGTTGGAAAACGAGCAG 20  
\*||:|||||:\*\*\*

Sbjct: 69 TCTTCAACCTTTTGCTTATA 50  
>miR5177 Score: 2.5 R03G\_15265  
Query: 1 TGAGGTTGGAAAACGAGCAG 20  
|||||:||||\*\*|||||

Sbjct: 1215 ACTCCAGCCTTCCGCTCGTC 1196  
>miR5177 Score: 2.5 R03G\_15268  
Query: 1 TGAGGTTGGAAAACGAGCAG 20  
|||||:||||\*\*|||||

Sbjct: 1215 ACTCCAGCCTTCCGCTCGTC 1196  
>miR5177 Score: 2.5 R03G\_13129  
Query: 1 TGAGGTTGGAAAACGAGCAG 20  
|:|||||\*||\*||

Sbjct: 365 ATTCCAACCTTTGGCTAGTC 346  
>miR5177 Score: 2.5 R03G\_13219  
Query: 1 TGAGGTTGGAAAACGAGCAG 20  
|||||:||||\*\*|||||

Sbjct: 1215 ACTCCAGCCTTCCGCTCGTC 1196

>miR5177 Score: 2.5 R03G\_13222  
Query: 1 TGAGGTTGGAAAACGAGCAG 20  
|||||:||||\*\*|||||  
Sbjct: 1209 ACTCCAGCCTTCCGCTCGTC 1190

>miR5177 Score: 1.5 R03G\_12627  
Query: 1 TGAGGTTGGAAAACGAGCAG 20  
\*|||||\*|||||  
Sbjct: 1137 CCTCCAACCTTCTGCTCGTC 1118

>miR5177 Score: 2.5 R03G\_05640  
Query: 1 TGAGGTTGGAAAACGAGCAG 20  
|||||:||||\*\*|||||  
Sbjct: 1152 ACTCCAGCCTTCCGCTCGTC 1133

>miR5177 Score: 2.5 R03G\_05952  
Query: 1 TGAGGTTGGAAAACGAGCAG 20  
|||||:||||\*\*|||||  
Sbjct: 1095 ACTCCAGCCTTCCGCTCGTC 1076

>miR5177 Score: 2.5 R03G\_05990  
Query: 1 TGAGGTTGGAAAACGAGCAG 20  
||\*||||\*|||||\*||  
Sbjct: 1236 ACTACAACCTTTGCTCTTC 1217

>miR5177 Score: 2.5 R03G\_06701  
Query: 1 TGAGGTTGGAAAACGAGCAG 20  
||\*:||||\*|||||  
Sbjct: 336 ACTTAAACATTTGCTCGTC 317

>miR5177 Score: 2.5 R03G\_04121  
Query: 1 TGAGGTTGGAAAACGAGCAG 20  
|||||:||||\*\*|||||  
Sbjct: 1215 ACTCCAGCCTTCCGCTCGTC 1196

>miR5177 Score: 2.5 R03G\_00075  
Query: 1 TGAGGTTGGAAAACGAGCAG 20  
\*||\*|||||\*|||||  
Sbjct: 1233 CCTACAACCTATTGCTCGTC 1214

>miR5177 Score: 2.0 R03G\_01141  
Query: 1 TGAGGTTGGAAAACGAGCAG 20  
||||:|||||\*||||\*||  
Sbjct: 517 ACTCTAACCTTTCGCTC-TC 499

>miR5177 Score: 0.0 R03G\_17015  
Query: 1 TGAGGTTGGAAAACGAGCAG 20  
|||||  
Sbjct: 1227 ACTCCAACCTTTTCTGCTCGTC 1208

>miR6248 Score: 2.5 R03G\_16143  
Query: 1 TATTGAGGTGGAGGTTAGTG 20  
\*||:||:|||||:||\*||  
Sbjct: 538 TTAGCTTCACCTCTAATAAC 519

>miR6248 Score: 2.5 R03G\_16292

Query: 1 TATTGAGGTGGAGGTTAGTG 20  
:||:|||||||\*||:|\*|  
Sbjct: 658 GTAGCTCCACCTCCCATT-C 640  
>miR6248 Score: 2.5 R03G\_15135  
Query: 1 TATTGAGGTGGAGGTTAGTG 20  
\*||:||:||||||:||\*||  
Sbjct: 538 TTAGCTTCACCTCTAATAAC 519  
>miR6248 Score: 0.0 R03G\_12949  
Query: 1 TATTGAGGTGGAGGTTAGTG 20  
|||||||  
Sbjct: 766 ATAACTCCACCTCCAATCAC 747  
>miR6248 Score: 2.5 R03G\_12534  
Query: 1 TATTGAGGTGGAGGTTAGTG 20  
\*||:||:||||||:||\*||  
Sbjct: 538 TTAGCTTCACCTCTAATAAC 519  
>miR6248 Score: 2.5 R03G\_10206  
Query: 1 TATTGAGGTGGAGGTTAG-TG 20  
|||||||\*||:|\*||  
Sbjct: 425 ATAACTCCACCACCGGTCTAC 405  
>miR6248 Score: 2.5 R03G\_07027  
Query: 1 TATTGAGGTGGAGGTTAGTG 20  
\*||:||:||||||:||\*||  
Sbjct: 538 TTAGCTTCACCTCTAATAAC 519  
>miR6248 Score: 2.5 R03G\_05683  
Query: 1 TATTGAGGTGGAGGTTAGTG 20  
|||||||\*||:|\*||  
Sbjct: 551 ATAACTCCACCACCAG-CAC 533  
>miR6248 Score: 2.5 R03G\_06727  
Query: 1 TATTGAGGTGGAGGTTAGTG 20  
\*||:||:||||||:||\*||  
Sbjct: 676 TTAGCTTCACCTCTAATAAC 657  
>miR6248 Score: 2.0 R03G\_04538  
Query: 1 TATTGAGGTGGAGGTTAGTG 20  
\*|||||||\*||\*  
Sbjct: 1595 CTA ACTCCACCTCCAACCAA 1576  
>miR6248 Score: 2.5 R03G\_02690  
Query: 1 TATTGAGGTGGAGGTTAGTG 20  
\*||:||:||||||:||\*||  
Sbjct: 118 TTAGCTTCACCTCTAATAAC 99  
>miR6248 Score: 0.0 R03G\_04050  
Query: 1 TATTGAGGTGGAGGTTAGTG 20  
|||||||  
Sbjct: 1321 ATAACTCCACCTCCAATCAC 1302  
>miR6248 Score: 2.5 R03G\_04118  
Query: 1 TATTGAGGTGGAGGTTAGTG 20

\*||:|:|||||:|\*||  
Sbjct: 538 TTAGCTTCACCTCTAATAAC 519  
>miR6248 Score: 0.0 R03G\_00301  
Query: 1 TATTGAGGTGGAGGTTAGTG 20  
|||||  
Sbjct: 2605 ATAACCTCACCTCCAATCAC 2586  
>miR6248 Score: 2.5 R03G\_00949  
Query: 1 TATTGAGGTGGAGGTTAGTG 20  
\*|||\*|||||\*|||  
Sbjct: 2045 CTAACACCACCTCCAA-CAC 2027  
>miR6248 Score: 2.5 R03G\_17384  
Query: 1 TATTGAGGTGGAGGTTAGTG 20  
\*||:|:|||||:|\*||  
Sbjct: 538 TTAGCTTCACCTCTAATAAC 519  
>miR6248 Score: 2.5 R03G\_17318  
Query: 1 TATTGAGGTGGAGGTTAGTG 20  
\*||:|:|||||:|\*||  
Sbjct: 538 TTAGCTTCACCTCTAATAAC 519  
>miR6248 Score: 2.5 R03G\_17274  
Query: 1 TATTGAGGTGGAGGTTAGTG 20  
\*||:|:|||||:|\*||  
Sbjct: 538 TTAGCTTCACCTCTAATAAC 519  
>miR1849 Score: 0.0 R03G\_16810  
Query: 1 TAGCGTATCATAGGTTGGT 19  
|||||  
Sbjct: 216 ATCGCATAGTATCCAACCA 198  
>miR1849 Score: 0.0 R03G\_15157  
Query: 1 TAGCGTATCATAGGTTGGT 19  
|||||  
Sbjct: 573 ATCGCATAGTATCCAACCA 555  
>miR1849 Score: 2.5 R03G\_14264  
Query: 1 TAGCGTATCATAGGTTGGT 19  
||\*||:||||:|||||:  
Sbjct: 290 ATAGCGTAGTGTCCAACCTG 272  
>miR1849 Score: 1.5 R03G\_12960  
Query: 1 TAGCGTATCATAGGTTGGT 19  
\*||||:|||||:||||  
Sbjct: 234 CTCGCGTAGTATCCGACCA 216  
>miR1849 Score: 1.5 R03G\_12974  
Query: 1 TAGCGTATCATAGGTTGGT 19  
\*||||:|||||:||||  
Sbjct: 234 CTCGCGTAGTATCCGACCA 216  
>miR1849 Score: 0.0 R03G\_12005  
Query: 1 TAGCGTATCATAGGTTGGT 19  
|||||



Sbjct: 573 ATCGCATAGTATCCAACCA 555  
>miR1849 Score: 0.0 R03G\_12080  
Query: 1 TAGCGTATCATAGGTTGGT 19  
|||||

Sbjct: 156 ATCGCATAGTATCCAACCA 138  
>miR1849 Score: 2.2 R03G\_12201  
Query: 1 TAGCGTATCATAGGTTGGT 19  
:||||\*|

Sbjct: 36 GTCGAGTAGTATCCAACCT 18  
>miR1849 Score: 0.0 R03G\_11407  
Query: 1 TAGCGTATCATAGGTTGGT 19  
|||||

Sbjct: 156 ATCGCATAGTATCCAACCA 138  
>miR1849 Score: 1.5 R03G\_11953  
Query: 1 TAGCGTATCATAGGTTGGT 19  
\*||||:|||||:||||

Sbjct: 450 CTCGCGTAGTATCCGACCA 432  
>miR1849 Score: 1.5 R03G\_10525  
Query: 1 TAGCGTATCATAGGTTGGT 19  
\*||||:|||||:||||

Sbjct: 573 CTCGCGTAGTATCCGACCA 555  
>miR1849 Score: 1.5 R03G\_10531  
Query: 1 TAGCGTATCATAGGTTGGT 19  
\*||||:|||||:||||

Sbjct: 573 CTCGCGTAGTATCCGACCA 555  
>miR1849 Score: 1.5 R03G\_10545  
Query: 1 TAGCGTATCATAGGTTGGT 19  
\*||||:|||||:||||

Sbjct: 573 CTCGCGTAGTATCCGACCA 555  
>miR1849 Score: 2.5 R03G\_09022  
Query: 1 TAGCGTATCATAGGTTGGT 19  
\*\*||:|||||\*|

Sbjct: 1337 CACGTATAGTATCCAAC-A 1320  
>miR1849 Score: 1.5 R03G\_07110  
Query: 1 TAGCGTATCATAGGTTGGT 19  
\*||||:|||||:||||

Sbjct: 573 CTCGCGTAGTATCCGACCA 555  
>miR1849 Score: 1.5 R03G\_07676  
Query: 1 TAGCGTATCATAGGTTGGT 19  
\*||||:|||||:||||

Sbjct: 573 CTCGCGTAGTATCCGACCA 555  
>miR1849 Score: 1.5 R03G\_07678  
Query: 1 TAGCGTATCATAGGTTGGT 19  
\*||||:|||||:||||

Sbjct: 573 CTCGCGTAGTATCCGACCA 555

>miR1849 Score: 1.5 R03G\_05523  
Query: 1 TAGCGTATCATAGGTTGGT 19  
\*||||:|||||||:||||  
Sbjct: 573 CTCGCGTAGTATCCGACCA 555  
>miR1849 Score: 0.0 R03G\_05928  
Query: 1 TAGCGTATCATAGGTTGGT 19  
|||||||  
Sbjct: 345 ATCGCATAGTATCCAACCA 327  
>miR1849 Score: 0.0 R03G\_04676  
Query: 1 TAGCGTATCATAGGTTGGT 19  
|||||||  
Sbjct: 573 ATCGCATAGTATCCAACCA 555  
>miR1849 Score: 2.5 R03G\_02881  
Query: 1 TAGCGTATCATAGGTTGGT 19  
|||||||\*|:|\*|  
Sbjct: 636 ATCGCATAGTACTCGAC-A 619  
>miR1849 Score: 2.5 R03G\_03254  
Query: 1 TAGCGTATCATAGGTTGGT 19  
:|\*\*|||||||:|  
Sbjct: 114 GTGACATAGTATCCAACCTA 96  
>miR1849 Score: 1.5 R03G\_03767  
Query: 1 TAGCGTATCATAGGTTGGT 19  
\*||||:|||||||:||||  
Sbjct: 573 CTCGCGTAGTATCCGACCA 555  
>miR1849 Score: 2.5 R03G\_00382  
Query: 1 TAGCGTATCATAGGTTGGT 19  
\*|||\*|||||||:||||\*|  
Sbjct: 351 TTCGAATAGTATTCAAC-A 334  
>miR1849 Score: 1.5 R03G\_01949  
Query: 1 TAGCGTATCATAGGTTGGT 19  
\*||||:|||||||:||||  
Sbjct: 573 CTCGCGTAGTATCCGACCA 555  
>miR1849 Score: 1.5 R03G\_01968  
Query: 1 TAGCGTATCATAGGTTGGT 19  
\*||||:|||||||:||||  
Sbjct: 573 CTCGCGTAGTATCCGACCA 555  
>miR1849 Score: 1.5 R03G\_17380  
Query: 1 TAGCGTATCATAGGTTGGT 19  
\*||||:|||||||:||||  
Sbjct: 573 CTCGCGTAGTATCCGACCA 555  
>miR1047-3p Score: 0.0 R03G\_15127  
Query: 1 TGATCAGCATACTTCAGTTG 20  
|||||||  
Sbjct: 1283 ACTAGTCGTATGAAGTCAAC 1264  
>miR1047-3p Score: 2.5 R03G\_13898

Query: 1 TGATCAGCATACTTCAGTTG 20  
|||||||:|\*||\*||  
Sbjct: 370 ACTAGTCGTATGGGTTCTAC 351  
>miR1047-3p Score: 2.5 R03G\_13579  
Query: 1 TGATCAGCATACTTCAGTTG 20  
|||||||\*\*|\*||  
Sbjct: 1033 ACTAGTCGTATGAAAAC-AC 1015  
>miR1047-3p Score: 2.5 R03G\_00203  
Query: 1 TGATCAGCATACTTCAGTTG 20  
\*:||\*|||||||\*||  
Sbjct: 1907 CTTAATCGTATGAAGTC-AC 1889  
>miR1047-3p Score: 2.5 R03G\_00203  
Query: 1 TGATCAGCATACTTCAGTTG 20  
|||||||\*|||\*:|||||  
Sbjct: 1208 ACTAGTCGCATGTGGTCAAC 1189  
>miR1047-3p Score: 1.8 R03G\_00249  
Query: 1 TGATCAGCATACTTCAGTTG 20  
|||||||\*|||:|:|:|  
Sbjct: 92 ACTAGTCGCATGAGGTCGAC 73  
>miR1047-3p Score: 2.5 R03G\_01649  
Query: 1 TGATCAGCATACTTCAGTT-G 20  
|:|||||\*|||:||||\*|  
Sbjct: 476 ATTAGTCGCATGAGGTC AAGC 456  
>miR1047-3p Score: 1.5 R03G\_02142  
Query: 1 TGATCAGCATACTTCAGTTG 20  
\*|||||\*|||||||  
Sbjct: 1799 CCTAGTCCTATGAAGTCAAC 1780  
>miR5176-5p Score: 0.2 R03G\_15862  
Query: 1 TATTCCATGTGTCACATCTC 20  
:|||||||  
Sbjct: 595 GTAAGGTACACAGTGTAGAG 576  
>miR5176-5p Score: 0.2 R03G\_15274  
Query: 1 TATTCCATGTGTCACATCTC 20  
:|||||||  
Sbjct: 595 GTAAGGTACACAGTGTAGAG 576  
>miR5176-5p Score: 0.2 R03G\_15288  
Query: 1 TATTCCATGTGTCACATCTC 20  
:|||||||  
Sbjct: 595 GTAAGGTACACAGTGTAGAG 576  
>miR5176-5p Score: 0.2 R03G\_13916  
Query: 1 TATTCCATGTGTCACATCTC 20  
:|||||||  
Sbjct: 595 GTAAGGTACACAGTGTAGAG 576  
>miR5176-5p Score: 0.0 R03G\_12182  
Query: 1 TATTCCATGTGTCACATCTC 20

```
|||||
Sbjct: 595 ATAAGGTACACAGTGTAGAG 576
>miR5176-5p Score: 0.2 R03G_12541
Query: 1 TATCCATGTGTCACATCTC 20
:|||||
Sbjct: 595 GTAAGGTACACAGTGTAGAG 576
>miR5176-5p Score: 0.2 R03G_11272
Query: 1 TATCCATGTGTCACATCTC 20
:|||||
Sbjct: 595 GTAAGGTACACAGTGTAGAG 576
>miR5176-5p Score: 0.2 R03G_11784
Query: 1 TATCCATGTGTCACATCTC 20
:|||||
Sbjct: 595 GTAAGGTACACAGTGTAGAG 576
>miR5176-5p Score: 0.0 R03G_10860
Query: 1 TATCCATGTGTCACATCTC 20
|||||
Sbjct: 595 ATAAGGTACACAGTGTAGAG 576
>miR5176-5p Score: 0.2 R03G_09496
Query: 1 TATCCATGTGTCACATCTC 20
:|||||
Sbjct: 595 GTAAGGTACACAGTGTAGAG 576
>miR5176-5p Score: 0.0 R03G_08111
Query: 1 TATCCATGTGTCACATCTC 20
|||||
Sbjct: 595 ATAAGGTACACAGTGTAGAG 576
>miR5176-5p Score: 0.0 R03G_07729
Query: 1 TATCCATGTGTCACATCTC 20
|||||
Sbjct: 364 ATAAGGTACACAGTGTAGAG 345
>miR5176-5p Score: 2.5 R03G_04287
Query: 1 TATCCATGTGTCACATCTC 20
||:|*|:|||||*||
Sbjct: 1132 ATGAGCTGCACAGTGTA-AG 1114
>miR5176-5p Score: 2.5 R03G_04878
Query: 1 TATCCATGTGTCACATCTC 20
||:|*|:|||||*||
Sbjct: 943 ATGAGCTGCACAGTGTA-AG 925
>miR5176-5p Score: 0.0 R03G_02682
Query: 1 TATCCATGTGTCACATCTC 20
|||||
Sbjct: 595 ATAAGGTACACAGTGTAGAG 576
>miR5176-5p Score: 2.0 R03G_02988
Query: 1 TATCCATGTGTCACATC-TC 20
*|||||*|||||*||
```

Sbjct: 1347 TTAAGGTACAAAGTGTAGTAG 1327  
>miR5176-5p Score: 0.0 R03G\_17289  
Query: 1 TATTCCATGTGTCACATCTC 20  
|||||  
Sbjct: 595 ATAAGGTACACAGTGTAGAG 576  
>miR5726 Score: 0.0 R03G\_13448  
Query: 1 TAAAGAGTTGCTTGAATCAGG 21  
|||||  
Sbjct: 975 ATTTCTCAACGAACTTAGTCC 955  
>miR5726 Score: 2.2 R03G\_10510  
Query: 1 TAAAGAGTTGCTTGAATCAGG 21  
||||:||||:|\*|||||:  
Sbjct: 117 ATTTTTCAGCAACTTAGTCT 97  
>miR5243 Score: 2.5 R03G\_02034  
Query: 1 TGGGCCAGAATCGTGGGC 18  
\*\*|||||:|||||:|  
Sbjct: 2027 TACCGTTTTAGCACTCG 2010  
>miR8602 Score: 0.0 R03G\_17259  
Query: 1 TCAGGAGAGTATGCTGGCCA 20  
|||||  
Sbjct: 209 AGTCCTCTCATACGACCGGT 190  
>miR8602 Score: 0.0 R03G\_17249  
Query: 1 TCAGGAGAGTATGCTGGCCA 20  
|||||  
Sbjct: 728 AGTCCTCTCATACGACCGGT 709  
>miR8602 Score: 2.0 R03G\_17207  
Query: 1 TCAGGAGAGTATGCTGGCCA 20  
||||\*||:||:|||||  
Sbjct: 161 AGTCCACTTATATGACCGGT 142  
>miR8602 Score: 1.5 R03G\_16536  
Query: 1 TCAGGAGAGTATGCTGGCCA 20  
||||\*||:|||||  
Sbjct: 122 AGTCCGCTTATACGACCGGT 103  
>miR8602 Score: 2.0 R03G\_15895  
Query: 1 TCAGGAGAGTATGCTGGCCA 20  
||||\*||:||:|||||  
Sbjct: 122 AGTCCACTTATATGACCGGT 103  
>miR8602 Score: 1.5 R03G\_15166  
Query: 1 TCAGGAGAGTATGCTGGCCA 20  
||||\*||:|||||  
Sbjct: 809 AGTCCACTTATACGACCGGT 790  
>miR8602 Score: 0.0 R03G\_14363  
Query: 1 TCAGGAGAGTATGCTGGCCA 20  
|||||  
Sbjct: 761 AGTCCTCTCATACGACCGGT 742

>miR8602 Score: 0.5 R03G\_14547  
Query: 1 TCAGGAGAGTATGCTGGCCA 20  
|||||:||||  
Sbjct: 209 AGTCCTCTCATACGATCGGT 190

>miR8602 Score: 0.5 R03G\_13921  
Query: 1 TCAGGAGAGTATGCTGGCCA 20  
|||:|||||  
Sbjct: 209 AGTTCTCTCATACGACCGGT 190

>miR8602 Score: 0.0 R03G\_13863  
Query: 1 TCAGGAGAGTATGCTGGCCA 20  
|||||  
Sbjct: 503 AGTCCTCTCATACGACCGGT 484

>miR8602 Score: 0.0 R03G\_13270  
Query: 1 TCAGGAGAGTATGCTGGCCA 20  
|||||  
Sbjct: 803 AGTCCTCTCATACGACCGGT 784

>miR8602 Score: 0.0 R03G\_11527  
Query: 1 TCAGGAGAGTATGCTGGCCA 20  
|||||  
Sbjct: 209 AGTCCTCTCATACGACCGGT 190

>miR8602 Score: 0.8 R03G\_10734  
Query: 1 TCAGGAGAGTATGCTGGCCA 20  
:|||||:|||  
Sbjct: 209 GGCCTCTCATACGACTGGT 190

>miR8602 Score: 0.0 R03G\_10774  
Query: 1 TCAGGAGAGTATGCTGGCCA 20  
|||||  
Sbjct: 770 AGTCCTCTCATACGACCGGT 751

>miR8602 Score: 0.0 R03G\_10869  
Query: 1 TCAGGAGAGTATGCTGGCCA 20  
|||||  
Sbjct: 209 AGTCCTCTCATACGACCGGT 190

>miR8602 Score: 1.5 R03G\_07577  
Query: 1 TCAGGAGAGTATGCTGGCCA 20  
||||\*||:|||||  
Sbjct: 161 AGTCCACTTATACGACCGGT 142

>miR8602 Score: 2.5 R03G\_07783  
Query: 1 TCAGGAGAGTATGCTGGCCA 20  
|||||||\*|||||\*\*||  
Sbjct: 677 AGTCCTCTCTTACGACACGT 658

>miR8602 Score: 0.0 R03G\_05935  
Query: 1 TCAGGAGAGTATGCTGGCCA 20  
|||||  
Sbjct: 209 AGTCCTCTCATACGACCGGT 190

>miR8602 Score: 1.5 R03G\_05940

Query: 1 TCAGGAGAGTATGCTGGCCA 20  
||||\*||:|||||||  
Sbjct: 518 AGTCCACTTATACGACCGGT 499  
>miR8602 Score: 2.0 R03G\_04692  
Query: 1 TCAGGAGAGTATGCTGGCCA 20  
||||\*||:|||:|||||||  
Sbjct: 161 AGTCCACTTATATGACCGGT 142  
>miR8602 Score: 0.0 R03G\_04790  
Query: 1 TCAGGAGAGTATGCTGGCCA 20  
|||||||  
Sbjct: 209 AGTCCTCTCATACGACCGGT 190  
>miR8602 Score: 0.0 R03G\_03593  
Query: 1 TCAGGAGAGTATGCTGGCCA 20  
|||||||  
Sbjct: 209 AGTCCTCTCATACGACCGGT 190  
>miR8602 Score: 0.0 R03G\_03626  
Query: 1 TCAGGAGAGTATGCTGGCCA 20  
|||||||  
Sbjct: 209 AGTCCTCTCATACGACCGGT 190  
>miR8602 Score: 2.5 R03G\_03629  
Query: 1 TCAGGAGAGTATGCTGGCCA 20  
|||||||:||||\*||\*\*|  
Sbjct: 1085 AGTCCTCTTATACCACC-TT 1067  
>miR8602 Score: 1.5 R03G\_00237  
Query: 1 TCAGGAGAGTATGCTGGCCA 20  
||||\*||:|||||||  
Sbjct: 278 AGTCCACTTATACGACCGGT 259  
>miR8602 Score: 0.0 R03G\_00678  
Query: 1 TCAGGAGAGTATGCTGGCCA 20  
|||||||  
Sbjct: 173 AGTCCTCTCATACGACCGGT 154  
>miR8602 Score: 0.0 R03G\_01589  
Query: 1 TCAGGAGAGTATGCTGGCCA 20  
|||||||  
Sbjct: 209 AGTCCTCTCATACGACCGGT 190  
>miR8602 Score: 0.8 R03G\_17459  
Query: 1 TCAGGAGAGTATGCTGGCCA 20  
:|||||||:|||  
Sbjct: 209 GGCCTCTCATACGACTGGT 190  
>miR8602 Score: 0.0 R03G\_17276  
Query: 1 TCAGGAGAGTATGCTGGCCA 20  
|||||||  
Sbjct: 893 AGTCCTCTCATACGACCGGT 874  
>miR7814 Score: 2.5 R03G\_16088  
Query: 1 TAATATGTCTTTGATGCTT-TGA 22

:||||||\*||||||\*|\*|:|  
Sbjct: 553 GTTATACAAAACTACGTATATT 531  
>miR7814 Score: 0.0 R03G\_15585  
Query: 1 TAATATGTCTTTGATGCTTTGA 22  
|||||||  
Sbjct: 3018 ATTATACAGAACTACGAACT 2997  
>miR7814 Score: 0.0 R03G\_15250  
Query: 1 TAATATGTCTTTGATGCTTTGA 22  
|||||||  
Sbjct: 3171 ATTATACAGAACTACGAACT 3150  
>miR7814 Score: 0.0 R03G\_14355  
Query: 1 TAATATGTCTTTGATGCTTTGA 22  
|||||||  
Sbjct: 1422 ATTATACAGAACTACGAACT 1401  
>miR7814 Score: 0.0 R03G\_13867  
Query: 1 TAATATGTCTTTGATGCTTTGA 22  
|||||||  
Sbjct: 3132 ATTATACAGAACTACGAACT 3111  
>miR7814 Score: 0.5 R03G\_13920  
Query: 1 TAATATGTCTTTGATGCTTTGA 22  
|||||:|||||||  
Sbjct: 3216 ATTATATAGAACTACGAACT 3195  
>miR7814 Score: 0.0 R03G\_13749  
Query: 1 TAATATGTCTTTGATGCTTTGA 22  
|||||||  
Sbjct: 1779 ATTATACAGAACTACGAACT 1758  
>miR7814 Score: 0.0 R03G\_11776  
Query: 1 TAATATGTCTTTGATGCTTTGA 22  
|||||||  
Sbjct: 306 ATTATACAGAACTACGAACT 285  
>miR7814 Score: 0.0 R03G\_10558  
Query: 1 TAATATGTCTTTGATGCTTTGA 22  
|||||||  
Sbjct: 969 ATTATACAGAACTACGAACT 948  
>miR7814 Score: 0.0 R03G\_09965  
Query: 1 TAATATGTCTTTGATGCTTTGA 22  
|||||||  
Sbjct: 3216 ATTATACAGAACTACGAACT 3195  
>miR7814 Score: 0.0 R03G\_05619  
Query: 1 TAATATGTCTTTGATGCTTTGA 22  
|||||||  
Sbjct: 1359 ATTATACAGAACTACGAACT 1338  
>miR7814 Score: 0.0 R03G\_06427  
Query: 1 TAATATGTCTTTGATGCTTTGA 22  
|||||||



Sbjct: 2808 ATTATACAGAACTACGAACT 2787  
>miR7814 Score: 0.0 R03G\_06428  
Query: 1 TAATATGTCTTTGATGCTTTGA 22  
|||||

Sbjct: 2310 ATTATACAGAACTACGAACT 2289  
>miR7814 Score: 0.0 R03G\_06442  
Query: 1 TAATATGTCTTTGATGCTTTGA 22  
|||||

Sbjct: 3873 ATTATACAGAACTACGAACT 3852  
>miR7814 Score: 0.0 R03G\_05279  
Query: 1 TAATATGTCTTTGATGCTTTGA 22  
|||||

Sbjct: 162 ATTATACAGAACTACGAACT 141  
>miR7814 Score: 0.5 R03G\_02691  
Query: 1 TAATATGTCTTTGATGCTTTGA 22  
|||||:|||||

Sbjct: 6705 ATTATATAGAACTACGAACT 6684  
>miR7814 Score: 0.0 R03G\_02959  
Query: 1 TAATATGTCTTTGATGCTTTGA 22  
|||||

Sbjct: 3216 ATTATACAGAACTACGAACT 3195  
>miR7814 Score: 0.5 R03G\_03547  
Query: 1 TAATATGTCTTTGATGCTTTGA 22  
|||||:|||||

Sbjct: 3216 ATTATATAGAACTACGAACT 3195  
>miR7814 Score: 0.0 R03G\_04115  
Query: 1 TAATATGTCTTTGATGCTTTGA 22  
|||||

Sbjct: 159 ATTATACAGAACTACGAACT 138  
>miR7814 Score: 1.0 R03G\_00306  
Query: 1 TAATATGTCTTTGATGCTTTGA 22  
|\*|||||

Sbjct: 1512 ACTATACAGAACTACGAACT 1491  
>miR7814 Score: 1.0 R03G\_01330  
Query: 1 TAATATGTCTTTGATGCTTTGA 22  
||\*|||||

Sbjct: 450 ATCATACAGAACTACGAACT 429  
>miR7814 Score: 0.5 R03G\_01613  
Query: 1 TAATATGTCTTTGATGCTTTGA 22  
|||||:|||||

Sbjct: 1467 ATTATACGAACTACGAACT 1446  
>miR7814 Score: 2.5 R03G\_02034  
Query: 1 TAATATGTCTTTGATGCTTTGA 22  
|||||:|||||:|:|:|\*|

Sbjct: 1302 ATTATATAGAAATTATGGGAGT 1281

>miR7814 Score: 0.0 R03G\_02222  
Query: 1 TAATATGTCTTTGATGCTTTGA 22  
|||||  
Sbjct: 270 ATTATACAGAACTACGAACT 249

>miR7814 Score: 0.0 R03G\_17371  
Query: 1 TAATATGTCTTTGATGCTTTGA 22  
|||||  
Sbjct: 3171 ATTATACAGAACTACGAACT 3150

>miR7814 Score: 0.0 R03G\_17326  
Query: 1 TAATATGTCTTTGATGCTTTGA 22  
|||||  
Sbjct: 3048 ATTATACAGAACTACGAACT 3027

>miR6116-3p Score: 0.0 R03G\_15681  
Query: 1 TCATTTGTCATCCAAGCATTAG 22  
|||||  
Sbjct: 65 AGTAAACAGTAGGTTTCGTAATC 44

>miR6116-3p Score: 0.0 R03G\_13488  
Query: 1 TCATTTGTCATCCAAGCATTAG 22  
|||||  
Sbjct: 65 AGTAAACAGTAGGTTTCGTAATC 44

>miR6116-3p Score: 0.0 R03G\_13491  
Query: 1 TCATTTGTCATCCAAGCATTAG 22  
|||||  
Sbjct: 65 AGTAAACAGTAGGTTTCGTAATC 44

>miR6116-3p Score: 0.0 R03G\_12001  
Query: 1 TCATTTGTCATCCAAGCATTAG 22  
|||||  
Sbjct: 806 AGTAAACAGTAGGTTTCGTAATC 785

>miR6116-3p Score: 0.0 R03G\_10556  
Query: 1 TCATTTGTCATCCAAGCATTAG 22  
|||||  
Sbjct: 806 AGTAAACAGTAGGTTTCGTAATC 785

>miR6116-3p Score: 0.0 R03G\_05824  
Query: 1 TCATTTGTCATCCAAGCATTAG 22  
|||||  
Sbjct: 65 AGTAAACAGTAGGTTTCGTAATC 44

>miR6116-3p Score: 0.0 R03G\_03517  
Query: 1 TCATTTGTCATCCAAGCATTAG 22  
|||||  
Sbjct: 65 AGTAAACAGTAGGTTTCGTAATC 44

>miR6116-3p Score: 0.0 R03G\_03518  
Query: 1 TCATTTGTCATCCAAGCATTAG 22  
|||||  
Sbjct: 65 AGTAAACAGTAGGTTTCGTAATC 44

>miR6116-3p Score: 0.0 R03G\_01302

Query: 1 TCATTTGTCATCCAAGCATTAG 22  
|||||  
Sbjct: 377 AGTAAACAGTAGGTTTCGTAATC 356  
>miR6116-3p Score: 0.0 R03G\_17369  
Query: 1 TCATTTGTCATCCAAGCATTAG 22  
|||||  
Sbjct: 806 AGTAAACAGTAGGTTTCGTAATC 785  
>miR5065 Score: 2.5 R03G\_12990  
Query: 1 TAGGCTTACTTATACATT 18  
\*||||\*|:|  
Sbjct: 188 TTCCGAAAGGGTATGTAA 171  
>miR5065 Score: 2.5 R03G\_08665  
Query: 1 TAGGCTTACTTATACATT 18  
|:|:|:|\*|  
Sbjct: 1594 ATTCGAGTGAATGTTTAA 1577  
>miR5065 Score: 2.5 R03G\_00543  
Query: 1 TAGGCTTACTTATACATT 18  
|\*|:|\*|  
Sbjct: 908 AACTGAAGGAATATGTAA 891  
>miR5645a Score: 2.5 R03G\_05619  
Query: 1 TTTGCAGTCACGGCGTTAAG 20  
|:|:|\*  
Sbjct: 3521 AAACGTCAGTGTCTGTAATAA 3502  
>miR5645a Score: 2.5 R03G\_00812  
Query: 1 TTTGCAGTCACGGCGTTAAG-G 20  
|\*|:|\*|  
Sbjct: 540 AACTTCAGTGCCGAGCTGC 520  
>miR6473 Score: 2.2 R03G\_14532  
Query: 1 TCCACAATGCCAAAGAGTT 19  
|:|:|:|  
Sbjct: 3029 AGGTGTTGTGGTTTTTTTGA 3011  
>miR6473 Score: 2.5 R03G\_14295  
Query: 1 TCCACAATGCCAAAGAGTT 19  
|\*|:|\*|  
Sbjct: 35 AGGTGTAATGGTTTCTTTA 17  
>miR6473 Score: 2.2 R03G\_13808  
Query: 1 TCCACAATGCCAAAGAGTT 19  
|:|:|:|  
Sbjct: 329 AGGTGTTGTGGTTTTTTTGA 311  
>miR6473 Score: 2.5 R03G\_13244  
Query: 1 TCCACAATGCCAAAGAGTT 19  
|\*|:|\*|  
Sbjct: 4040 AGGACTTATGGTTTCTCAA 4022  
>miR6473 Score: 2.0 R03G\_05727  
Query: 1 TCCACAATGCCAAAGAGTT 19

```
||||*|||||||:|*|
Sbjct: 406 AGGTTTTACGGTTTTTCTA 388
>miR6473 Score: 2.0 R03G_05738
Query: 1 TCCACAATGCCAAAGAGTT 19
||||*|||||||:|*|
Sbjct: 406 AGGTTTTACGGTTTTTCTA 388
>miR6473 Score: 2.2 R03G_03123
Query: 1 TCCACAATGCCAAAGAGTT 19
||||||:|:|:|
Sbjct: 329 AGGTGTTGTGGTTTTTTGA 311
>miR6473 Score: 2.2 R03G_01427
Query: 1 TCCACAATGCCAAAGAGTT 19
||||||:|:|:|
Sbjct: 329 AGGTGTTGTGGTTTTTTGA 311
>miR3712 Score: 2.0 R03G_17220
Query: 1 TGCTGATCAAGATCAAGACCA 21
*:*|||||||
Sbjct: 536 CTGTCTAGTTCTAGTTCTGGT 516
>miR3712 Score: 0.0 R03G_16744
Query: 1 TGCTGATCAAGATCAAGACCA 21
|||||||
Sbjct: 578 ACGACTAGTTCTAGTTCTGGT 558
>miR3712 Score: 0.0 R03G_16686
Query: 1 TGCTGATCAAGATCAAGACCA 21
|||||||
Sbjct: 578 ACGACTAGTTCTAGTTCTGGT 558
>miR3712 Score: 0.0 R03G_15869
Query: 1 TGCTGATCAAGATCAAGACCA 21
|||||||
Sbjct: 578 ACGACTAGTTCTAGTTCTGGT 558
>miR3712 Score: 0.0 R03G_14704
Query: 1 TGCTGATCAAGATCAAGACCA 21
|||||||
Sbjct: 578 ACGACTAGTTCTAGTTCTGGT 558
>miR3712 Score: 0.0 R03G_13450
Query: 1 TGCTGATCAAGATCAAGACCA 21
|||||||
Sbjct: 533 ACGACTAGTTCTAGTTCTGGT 513
>miR3712 Score: 0.0 R03G_13859
Query: 1 TGCTGATCAAGATCAAGACCA 21
|||||||
Sbjct: 203 ACGACTAGTTCTAGTTCTGGT 183
>miR3712 Score: 1.0 R03G_12951
Query: 1 TGCTGATCAAGATCAAGACCA 21
||*|||||||
```

Sbjct: 578 ACAACTAGTTCTAGTTCTGGT 558  
>miR3712 Score: 0.0 R03G\_12979  
Query: 1 TGCTGATCAAGATCAAGACCA 21  
|||||  
Sbjct: 578 ACGACTAGTTCTAGTTCTGGT 558  
>miR3712 Score: 0.0 R03G\_13152  
Query: 1 TGCTGATCAAGATCAAGACCA 21  
|||||  
Sbjct: 578 ACGACTAGTTCTAGTTCTGGT 558  
>miR3712 Score: 0.0 R03G\_11970  
Query: 1 TGCTGATCAAGATCAAGACCA 21  
|||||  
Sbjct: 578 ACGACTAGTTCTAGTTCTGGT 558  
>miR3712 Score: 0.0 R03G\_12087  
Query: 1 TGCTGATCAAGATCAAGACCA 21  
|||||  
Sbjct: 578 ACGACTAGTTCTAGTTCTGGT 558  
>miR3712 Score: 0.0 R03G\_12194  
Query: 1 TGCTGATCAAGATCAAGACCA 21  
|||||  
Sbjct: 578 ACGACTAGTTCTAGTTCTGGT 558  
>miR3712 Score: 0.0 R03G\_11275  
Query: 1 TGCTGATCAAGATCAAGACCA 21  
|||||  
Sbjct: 578 ACGACTAGTTCTAGTTCTGGT 558  
>miR3712 Score: 0.0 R03G\_11403  
Query: 1 TGCTGATCAAGATCAAGACCA 21  
|||||  
Sbjct: 578 ACGACTAGTTCTAGTTCTGGT 558  
>miR3712 Score: 0.0 R03G\_10555  
Query: 1 TGCTGATCAAGATCAAGACCA 21  
|||||  
Sbjct: 578 ACGACTAGTTCTAGTTCTGGT 558  
>miR3712 Score: 0.0 R03G\_10560  
Query: 1 TGCTGATCAAGATCAAGACCA 21  
|||||  
Sbjct: 578 ACGACTAGTTCTAGTTCTGGT 558  
>miR3712 Score: 2.5 R03G\_10759  
Query: 1 TGCTGATCAAGATCAAGACCA 21  
||||\*|||||:|\*\*|  
Sbjct: 518 ACGACAAGTTCTAGTTTT-TT 499  
>miR3712 Score: 0.0 R03G\_09376  
Query: 1 TGCTGATCAAGATCAAGACCA 21  
|||||  
Sbjct: 578 ACGACTAGTTCTAGTTCTGGT 558

>miR3712 Score: 0.0 R03G\_08612  
Query: 1 TGCTGATCAAGATCAAGACCA 21  
|||||  
Sbjct: 578 ACGACTAGTTCTAGTTCTGGT 558

>miR3712 Score: 0.0 R03G\_07104  
Query: 1 TGCTGATCAAGATCAAGACCA 21  
|||||  
Sbjct: 578 ACGACTAGTTCTAGTTCTGGT 558

>miR3712 Score: 0.0 R03G\_07305  
Query: 1 TGCTGATCAAGATCAAGACCA 21  
|||||  
Sbjct: 578 ACGACTAGTTCTAGTTCTGGT 558

>miR3712 Score: 0.0 R03G\_05630  
Query: 1 TGCTGATCAAGATCAAGACCA 21  
|||||  
Sbjct: 578 ACGACTAGTTCTAGTTCTGGT 558

>miR3712 Score: 0.0 R03G\_06416  
Query: 1 TGCTGATCAAGATCAAGACCA 21  
|||||  
Sbjct: 578 ACGACTAGTTCTAGTTCTGGT 558

>miR3712 Score: 0.0 R03G\_05280  
Query: 1 TGCTGATCAAGATCAAGACCA 21  
|||||  
Sbjct: 578 ACGACTAGTTCTAGTTCTGGT 558

>miR3712 Score: 2.5 R03G\_05369  
Query: 1 TGCTGATCAAGATCAAGACCA 21  
\*|||\*|\*\*  
Sbjct: 335 TTGACTAGTTCTAGTTC-GAA 316

>miR3712 Score: 0.5 R03G\_03103  
Query: 1 TGCTGATCAAGATCAAGACCA 21  
|||||\*||  
Sbjct: 578 ACGACTAGTTCTAGTTCTAGT 558

>miR3712 Score: 2.0 R03G\_03330  
Query: 1 TGCTGATCAAGATCAAGACCA 21  
\*|||\*|\*\*  
Sbjct: 1586 CCGACTAGTTCTAGTTC-GAA 1567

>miR3712 Score: 0.0 R03G\_03988  
Query: 1 TGCTGATCAAGATCAAGACCA 21  
|||||  
Sbjct: 578 ACGACTAGTTCTAGTTCTGGT 558

>miR3712 Score: 0.0 R03G\_01203  
Query: 1 TGCTGATCAAGATCAAGACCA 21  
|||||  
Sbjct: 578 ACGACTAGTTCTAGTTCTGGT 558

>miR3712 Score: 0.0 R03G\_01718

Query: 1 TGCTGATCAAGATCAAGACCA 21  
|||||  
Sbjct: 578 ACGACTAGTTCTAGTTCTGGT 558  
>miR163 Score: 0.5 R03G\_17241  
Query: 1 TTGAAGAGCAGCATGGAATTCGT 23  
|||||:|||||  
Sbjct: 192 AACTTCTTGTCGTACCTTAAGCA 170  
>miR163 Score: 2.0 R03G\_16486  
Query: 1 TTGAAGAGCAGCATGGAATTCGT 23  
:|||||\*|||\*|:|  
Sbjct: 2430 GACTTCTCGTCGGACCTCAGGCA 2408  
>miR163 Score: 0.5 R03G\_16127  
Query: 1 TTGAAGAGCAGCATGGAATTCGT 23  
|||||:|||||  
Sbjct: 873 AACTTCTTGTCGTACCTTAAGCA 851  
>miR163 Score: 0.5 R03G\_15256  
Query: 1 TTGAAGAGCAGCATGGAATTCGT 23  
|||||:|||||  
Sbjct: 873 AACTTCTTGTCGTACCTTAAGCA 851  
>miR163 Score: 0.5 R03G\_13711  
Query: 1 TTGAAGAGCAGCATGGAATTCGT 23  
|||||:|||||  
Sbjct: 858 AACTTCTTGTCGTACCTTAAGCA 836  
>miR163 Score: 0.0 R03G\_13072  
Query: 1 TTGAAGAGCAGCATGGAATTCGT 23  
|||||:|||||  
Sbjct: 777 AACTTCTCGTCGTACCTTAAGCA 755  
>miR163 Score: 0.5 R03G\_12195  
Query: 1 TTGAAGAGCAGCATGGAATTCGT 23  
|||||:|||||  
Sbjct: 66 AACTTCTTGTCGTACCTTAAGCA 44  
>miR163 Score: 0.5 R03G\_10737  
Query: 1 TTGAAGAGCAGCATGGAATTCGT 23  
|||||:|||||  
Sbjct: 873 AACTTCTTGTCGTACCTTAAGCA 851  
>miR163 Score: 0.5 R03G\_10048  
Query: 1 TTGAAGAGCAGCATGGAATTCGT 23  
|||||:|||||  
Sbjct: 873 AACTTCTTGTCGTACCTTAAGCA 851  
>miR163 Score: 0.5 R03G\_09184  
Query: 1 TTGAAGAGCAGCATGGAATTCGT 23  
|||||:|||||  
Sbjct: 585 AACTTCTTGTCGTACCTTAAGCA 563  
>miR163 Score: 0.5 R03G\_07115  
Query: 1 TTGAAGAGCAGCATGGAATTCGT 23

|||||||:|||||||  
Sbjct: 834 AACTTCTTGTCGTACCTTAAGCA 812  
>miR163 Score: 2.2 R03G\_07933  
Query: 1 TTGAAGAGCAGCATGGAATTCGT 23  
|||||||\*|\*|:|\*||  
Sbjct: 1353 AACTTCTCGTCGTACGT-AGACA 1332  
>miR163 Score: 0.5 R03G\_05910  
Query: 1 TTGAAGAGCAGCATGGAATTCGT 23  
|||||||:|||||||  
Sbjct: 873 AACTTCTTGTCGTACCTTAAGCA 851  
>miR163 Score: 2.5 R03G\_04623  
Query: 1 TTGAAGAGCAGCATGGAATTCGT 23  
|:||||:||||\*|\*||\*|\*||  
Sbjct: 141 AGCTTTTCGTCCTACCTT-AGCA 120  
>miR163 Score: 0.5 R03G\_02231  
Query: 1 TTGAAGAGCAGCATGGAATTCGT 23  
|||||||:|||||||  
Sbjct: 873 AACTTCTTGTCGTACCTTAAGCA 851  
>miR163 Score: 0.5 R03G\_02827  
Query: 1 TTGAAGAGCAGCATGGAATTCGT 23  
|||||||:|||||||  
Sbjct: 873 AACTTCTTGTCGTACCTTAAGCA 851  
>miR163 Score: 0.5 R03G\_00259  
Query: 1 TTGAAGAGCAGCATGGAATTCGT 23  
|||||||:|||||||  
Sbjct: 873 AACTTCTTGTCGTACCTTAAGCA 851  
>miR163 Score: 0.5 R03G\_01198  
Query: 1 TTGAAGAGCAGCATGGAATTCGT 23  
|||||||:|||||||  
Sbjct: 807 AACTTCTTGTCGTACCTTAAGCA 785  
>miR163 Score: 0.5 R03G\_01723  
Query: 1 TTGAAGAGCAGCATGGAATTCGT 23  
|||||||:|||||||  
Sbjct: 294 AACTTCTTGTCGTACCTTAAGCA 272  
>miR5648-5p Score: 2.5 R03G\_14543  
Query: 1 TTTAAAAATTTGGCCTTGACT 21  
|||||||:|\*\*|\*||\*||  
Sbjct: 1472 AAATTTTAAATCCTAACTGA 1452  
>miR5648-5p Score: 2.2 R03G\_09804  
Query: 1 TTTAAAAATTTGGCCTTGACT 21  
:|:|||||:|||||||\*|\*|  
Sbjct: 239 GAGTTTTTGAACCGGAAC-CA 220  
>miR1097 Score: 0.0 R03G\_16362  
Query: 1 TGCCATTGTTTGTGTTGGAAG 22  
|||||||:|||||||



Sbjct: 2725 ACGGTAACAAACAACACCTTC 2704  
>miR1097 Score: 2.5 R03G\_15109  
Query: 1 TGCCATTGTTTGTGTTGGA-AG 22  
|||||:||||:|||||\*\*|  
Sbjct: 144 ACGGTAGTAAACGACAACCTAAC 122  
>miR1097 Score: 2.5 R03G\_06371  
Query: 1 TGCCATTGTTTGTGTTGGAAG 22  
|||||:||||\*||\*\*|  
Sbjct: 760 ACGGTAACAAACGACA-CCGAC 740  
>miR1097 Score: 2.0 R03G\_03008  
Query: 1 TGCCATTGTTTGTGTTGGAAG 22  
\*|||||:\*\*\*|  
Sbjct: 1802 TCGGTAACAAACAATTATA 1781  
>miR1097 Score: 2.5 R03G\_00127  
Query: 1 TGCCATTGTTTGTGTTGGAAG 22  
|||||\*|:|:||||\*||  
Sbjct: 1037 ACGGTAAGTAGCGACAACCTC 1016  
>miR536f Score: 0.0 R03G\_02551  
Query: 1 TTCCGTCCAAGCTGTGTTGA 20  
|||||  
Sbjct: 260 AAGGCAGGTTGACACAAC 241  
>miR536f Score: 2.2 R03G\_01892  
Query: 1 TTCCGTCCAAGCTGTGTTGA 20  
||||:||||:||||\*|:|  
Sbjct: 500 AAGGTAGGTTTGACAAAGCT 481  
>miR444b Score: 2.5 R03G\_15616  
Query: 1 TGCCGTTGCTGTTTCCAAGTT 21  
\*|\*|||||:||||:|:  
Sbjct: 521 CCAGCAACGACAGAGGTTTAG 501  
>miR444b Score: 2.5 R03G\_09068  
Query: 1 TGCCGTTGCTGTTTCCAAGTT 21  
|||\*|||\*|||||\*|||  
Sbjct: 1139 ACGTCAACCACAAAGGT-CAA 1120  
>miR444b Score: 2.5 R03G\_00707  
Query: 1 TGCCGTTGCTGTTTCCAAGTT 21  
\*|||\*|||||:|\*:  
Sbjct: 2019 TCGGAAACGACAAAGGTTTCG 1999  
>miR1886.2 Score: 2.5 R03G\_15363  
Query: 1 TGGATGATATTGTGATTGG 19  
|||\*||||:|:||||\*|  
Sbjct: 112 ACCAACTATGATACTAAAC 94  
>miR1886.2 Score: 2.0 R03G\_14446  
Query: 1 TGGATGATATTGTGATTGG 19  
|||||\*|\*|||||  
Sbjct: 1018 ACCTACCACAACACTAACC 1000



Query: 1 TCGGCCAGGCATTCCTTCCAA 21  
|||||  
Sbjct: 149 AGCCGGTCCGTAAGGAAGGTT 129  
>miR166b Score: 1.5 R03G\_00466  
Query: 1 TCGGCCAGGCATTCCTTCCAA 21  
||||\*||:|||||  
Sbjct: 149 AGCCAGTTCGTAAGGAAGGTT 129  
>miR166b Score: 0.5 R03G\_01504  
Query: 1 TCGGCCAGGCATTCCTTCCAA 21  
||||||:|||||  
Sbjct: 143 AGCCGGTTCGTAAGGAAGGTT 123  
>miR166b Score: 0.5 R03G\_01650  
Query: 1 TCGGCCAGGCATTCCTTCCAA 21  
||||||:|||||  
Sbjct: 143 AGCCGGTTCGTAAGGAAGGTT 123  
>miR9677-5p Score: 1.0 R03G\_14134  
Query: 1 TTTCTCTCCAACAGCCAAG 20  
||||||\*|||||  
Sbjct: 196 AAAGGAGAGGTTGCCGGTTC 177  
>miR9677-5p Score: 1.0 R03G\_10867  
Query: 1 TTTCTCTCCAACAGCCAAG 20  
||||||\*|||||  
Sbjct: 307 AAAGGAGAGGTTGCCGGTTC 288  
>miR9677-5p Score: 1.0 R03G\_05937  
Query: 1 TTTCTCTCCAACAGCCAAG 20  
||||||\*|||||  
Sbjct: 565 AAAGGAGAGGTTGCCGGTTC 546  
>miR2678 Score: 2.0 R03G\_13330  
Query: 1 TGAATTGTTGGGATTGTACTT 21  
\*||\*|:|||||  
Sbjct: 390 CTGAGCAACCCTAACATGAA 370  
>miR2678 Score: 0.0 R03G\_13722  
Query: 1 TGAATTGTTGGGATTGTACTT 21  
||||||\*|||||  
Sbjct: 1059 ACTTAACAACCCTAACATGAA 1039  
>miR2678 Score: 2.2 R03G\_08781  
Query: 1 TGAATTGTTGGGATTGTAC-TT 21  
|||||||:|\*|\*|  
Sbjct: 2794 ACTTAACAACCTTAACAAGTGA 2773  
>miR2678 Score: 2.5 R03G\_08782  
Query: 1 TGAATTGTTGGGATTGTACTT 21  
\*||||||\*||||||\*||  
Sbjct: 208 TCTTAACAAACCTAACAAAAA 188  
>miR2678 Score: 2.5 R03G\_06760  
Query: 1 TGAATTGTTGGGATTGTACTT 21

||\*|||||||:|\*||  
Sbjct: 162 ACATAACAACCCTAATAACAA 142  
>miR2678 Score: 2.5 R03G\_05796  
Query: 1 TGAATTGTTGGGATTGTACTT 21  
|||||||\*:\*|||\*||\*  
Sbjct: 1485 ACTTAACAACATTAACA-GAT 1466  
>miR2678 Score: 2.5 R03G\_03140  
Query: 1 TGAATTGTTGGGATTGTACTT 21  
|||||:|\*|||||:|\*||  
Sbjct: 348 ACTTAATAAGCCTAATATTA 328  
>miR157a-3p Score: 2.5 R03G\_12815  
Query: 1 GCTCTCTAGCCTTCTGTTCAT 20  
||\*|||||||\*||\*||  
Sbjct: 597 CGATAGATCGGAAAACATTA 578  
>miR157a-3p Score: 2.5 R03G\_05078  
Query: 1 GCTCTCTAGCCTTCTGTTCAT 20  
|||||:|||||||\*:\*|  
Sbjct: 68 CGAGAGGTCGGAAGAAGGAA 49  
>miR9662a-3p Score: 1.5 R03G\_16744  
Query: 1 TTAACATCCACAGAGCCAAG 20  
|||||||\*||\*|  
Sbjct: 518 AATTGTAGGTGTCTCTGTCC 499  
>miR9662a-3p Score: 1.5 R03G\_16686  
Query: 1 TTAACATCCACAGAGCCAAG 20  
|||||||\*||\*|  
Sbjct: 518 AATTGTAGGTGTCTCTGTCC 499  
>miR9662a-3p Score: 1.5 R03G\_15869  
Query: 1 TTAACATCCACAGAGCCAAG 20  
|||||||\*||\*|  
Sbjct: 518 AATTGTAGGTGTCTCTGTCC 499  
>miR9662a-3p Score: 1.5 R03G\_14704  
Query: 1 TTAACATCCACAGAGCCAAG 20  
|||||||\*||\*|  
Sbjct: 518 AATTGTAGGTGTCTCTGTCC 499  
>miR9662a-3p Score: 1.5 R03G\_13450  
Query: 1 TTAACATCCACAGAGCCAAG 20  
|||||||\*||\*|  
Sbjct: 473 AATTGTAGGTGTCTCTGTCC 454  
>miR9662a-3p Score: 1.5 R03G\_13859  
Query: 1 TTAACATCCACAGAGCCAAG 20  
|||||||\*||\*|  
Sbjct: 143 AATTGTAGGTGTCTCTGTCC 124  
>miR9662a-3p Score: 1.5 R03G\_12951  
Query: 1 TTAACATCCACAGAGCCAAG 20  
|||||||\*||\*|

Sbjct: 518 AATTGTAGGTGTCTCTGTCC 499  
>miR9662a-3p Score: 1.5 R03G\_12979  
Query: 1 TTAACATCCACAGAGCCAAG 20  
|||||\*||\*|

Sbjct: 518 AATTGTAGGTGTCTCTGTCC 499  
>miR9662a-3p Score: 1.5 R03G\_13152  
Query: 1 TTAACATCCACAGAGCCAAG 20  
|||||\*||\*|

Sbjct: 518 AATTGTAGGTGTCTCTGTCC 499  
>miR9662a-3p Score: 1.5 R03G\_11970  
Query: 1 TTAACATCCACAGAGCCAAG 20  
|||||\*||\*|

Sbjct: 518 AATTGTAGGTGTCTCTGTCC 499  
>miR9662a-3p Score: 1.5 R03G\_12087  
Query: 1 TTAACATCCACAGAGCCAAG 20  
|||||\*||\*|

Sbjct: 518 AATTGTAGGTGTCTCTGTCC 499  
>miR9662a-3p Score: 1.5 R03G\_12194  
Query: 1 TTAACATCCACAGAGCCAAG 20  
|||||\*||\*|

Sbjct: 518 AATTGTAGGTGTCTCTGTCC 499  
>miR9662a-3p Score: 1.5 R03G\_11275  
Query: 1 TTAACATCCACAGAGCCAAG 20  
|||||\*||\*|

Sbjct: 518 AATTGTAGGTGTCTCTGTCC 499  
>miR9662a-3p Score: 1.5 R03G\_11403  
Query: 1 TTAACATCCACAGAGCCAAG 20  
|||||\*||\*|

Sbjct: 518 AATTGTAGGTGTCTCTGTCC 499  
>miR9662a-3p Score: 1.5 R03G\_10555  
Query: 1 TTAACATCCACAGAGCCAAG 20  
|||||\*||\*|

Sbjct: 518 AATTGTAGGTGTCTCTGTCC 499  
>miR9662a-3p Score: 1.5 R03G\_10560  
Query: 1 TTAACATCCACAGAGCCAAG 20  
|||||\*||\*|

Sbjct: 518 AATTGTAGGTGTCTCTGTCC 499  
>miR9662a-3p Score: 1.5 R03G\_09376  
Query: 1 TTAACATCCACAGAGCCAAG 20  
|||||\*||\*|

Sbjct: 518 AATTGTAGGTGTCTCTGTCC 499  
>miR9662a-3p Score: 1.5 R03G\_08612  
Query: 1 TTAACATCCACAGAGCCAAG 20  
|||||\*||\*|

Sbjct: 518 AATTGTAGGTGTCTCTGTCC 499



Query: 1 TTAACATCCACAGAGCCAAG 20  
|||||||\*||\*|  
Sbjct: 518 AATTGTAGGTGTCTCTGTCC 499  
>miR9662a-3p Score: 1.5 R03G\_01718  
Query: 1 TTAACATCCACAGAGCCAAG 20  
|||||||\*||\*|  
Sbjct: 518 AATTGTAGGTGTCTCTGTCC 499  
>miR6485 Score: 0.0 R03G\_17255  
Query: 1 TGGATGTACCAGAGCATCAA 20  
|||||||  
Sbjct: 2819 ACCTACATGGTCTCGTAGTT 2800  
>miR6485 Score: 1.5 R03G\_17156  
Query: 1 TGGATGTACCAGAGCATCAA 20  
||||:|\*|  
Sbjct: 1121 ACCTATACGGTCTCGTAGTT 1102  
>miR6485 Score: 0.0 R03G\_16919  
Query: 1 TGGATGTACCAGAGCATCAA 20  
|||||||  
Sbjct: 443 ACCTACATGGTCTCGTAGTT 424  
>miR6485 Score: 2.5 R03G\_16519  
Query: 1 TGGATGTACCAGAGCATCAA 20  
||||||\*|\*|:|  
Sbjct: 186 ACCTACAGGATTTTCGTAGTT 167  
>miR6485 Score: 0.0 R03G\_14563  
Query: 1 TGGATGTACCAGAGCATCAA 20  
|||||||  
Sbjct: 431 ACCTACATGGTCTCGTAGTT 412  
>miR6485 Score: 0.0 R03G\_10543  
Query: 1 TGGATGTACCAGAGCATCAA 20  
|||||||  
Sbjct: 2321 ACCTACATGGTCTCGTAGTT 2302  
>miR6485 Score: 0.0 R03G\_10744  
Query: 1 TGGATGTACCAGAGCATCAA 20  
|||||||  
Sbjct: 2867 ACCTACATGGTCTCGTAGTT 2848  
>miR6485 Score: 0.0 R03G\_10745  
Query: 1 TGGATGTACCAGAGCATCAA 20  
|||||||  
Sbjct: 1835 ACCTACATGGTCTCGTAGTT 1816  
>miR6485 Score: 0.5 R03G\_07735  
Query: 1 TGGATGTACCAGAGCATCAA 20  
|||||||\*|  
Sbjct: 2768 ACCTACATGGTCTCGTAGCT 2749  
>miR6485 Score: 0.0 R03G\_07862  
Query: 1 TGGATGTACCAGAGCATCAA 20

```
|||||
Sbjct: 2978 ACCTACATGGTCTCGTAGTT 2959
>miR6485 Score: 2.5 R03G_00640
Query: 1 TGGATGTACCAGAGCATCAA 20
|::||:*|||||
Sbjct: 3146 ATTTATCTGGTCTCGTAGTT 3127
>miR6485 Score: 2.5 R03G_01294
Query: 1 TGGATGTACCAGAGCATCA-A 20
||:||:|*|||||*|
Sbjct: 1937 ACTTATACGGTCTCGTAGTCT 1917
>miR6485 Score: 0.0 R03G_17453
Query: 1 TGGATGTACCAGAGCATCAA 20
|||||
Sbjct: 881 ACCTACATGGTCTCGTAGTT 862
>miR6269 Score: 0.0 R03G_13221
Query: 1 TGCTGCAAGTGATTAGCCATGG 22
|||||
Sbjct: 881 ACGACGTTCACTAATCGGTACC 860
>miR6269 Score: 2.0 R03G_13224
Query: 1 TGCTGCAAGTGATTAGCCATGG 22
||*|||||*|||||
Sbjct: 881 ACAACGTTACCAATCGGTACC 860
>miR6269 Score: 2.0 R03G_04120
Query: 1 TGCTGCAAGTGATTAGCCATGG 22
||*|||||*|||||
Sbjct: 881 ACAACGTTACCAATCGGTACC 860
>miR6269 Score: 1.0 R03G_04123
Query: 1 TGCTGCAAGTGATTAGCCATGG 22
|||||*|||||
Sbjct: 881 ACGACGTTACCAATCGGTACC 860
>miR6269 Score: 2.0 R03G_17093
Query: 1 TGCTGCAAGTGATTAGCCATGG 22
||*|||||*|||||
Sbjct: 641 ACAACGTTACCAATCGGTACC 620
>miR6156 Score: 2.5 R03G_16582
Query: 1 TTGAAGAAGTTCTTTGTTTCGT 21
*|||||*::|||*||
Sbjct: 685 CACTTCTTCAACGAACAA-CA 666
>miR6156 Score: 2.0 R03G_13795
Query: 1 TTGAAGAAGTTCTTTGTTTCGT 21
|*|||||*||*
Sbjct: 1087 ATCTTCTTCAAGAAACA-GCC 1068
>miR6156 Score: 2.5 R03G_12847
Query: 1 TTGAAGAAGTTCTTTGTTTCGT 21
|::|||*::|
```



Sbjct: 589 AGTTTCTCTAAGAAACAAGCA 569  
>miR403-3p Score: 2.5 R03G\_02749  
Query: 1 TTAGATTCACGCACAAACTC 20  
\*:|||||||\*|||||||\*|  
Sbjct: 536 CGTCTAAGTGGGTGTTTGTG 517  
>miR403-3p Score: 2.5 R03G\_03878  
Query: 1 TTAGATTCACGCACAAACTC 20  
|||:|||||||\*||||||\*\*|  
Sbjct: 275 AATTTAAGTGCTTGTTTATG 256  
>miR5244 Score: 2.2 R03G\_12564  
Query: 1 TTCTCTTGAAGTAGTTGTTGGT 22  
||\*|||||||:|||||||\*|:|  
Sbjct: 570 AAAAGAACTTTATCAACACCTA 549  
>miR5244 Score: 0.0 R03G\_10142  
Query: 1 TTCTCTTGAAGTAGTTGTTGGT 22  
||||||||||||||||||||  
Sbjct: 359 AAGAGAACTTCATCAACAACCA 338  
>miR5244 Score: 2.5 R03G\_02474  
Query: 1 TTCTCTTGAAGTAGTTGTTGGT 22  
||||\*||||\*|||||||\*|||  
Sbjct: 102 AAGAAAACCTCCATCAACATCCA 81  
>miR5244 Score: 0.0 R03G\_03107  
Query: 1 TTCTCTTGAAGTAGTTGTTGGT 22  
||||||||||||||||||||  
Sbjct: 359 AAGAGAACTTCATCAACAACCA 338  
>miR5244 Score: 2.5 R03G\_01005  
Query: 1 TTCTCTTGAAGTAGTTGTTGGT 22  
|||||||\*|||||||:|::\*|  
Sbjct: 193 AAGAGAACGTCATCAATAGTAA 172  
>miR5244 Score: 2.5 R03G\_01078  
Query: 1 TTCTCTTGAAGTAGTTGTTGGT 22  
||||||||||:|\*|||\*||  
Sbjct: 228 AAGAGAACTTTGTCCACAAACA 207  
>miR2611 Score: 2.5 R03G\_15192  
Query: 1 TATTTTCAGTGTTGTGGTAGAA 22  
:|||||||:|:||||||:|\*\*  
Sbjct: 849 GTAAAAGTTATAACACCGTCGC 828  
>miR6464 Score: 1.2 R03G\_17253  
Query: 1 TGTTTGCTTGTTGATGTTGAT 21  
::|||||||||||||||:||||  
Sbjct: 625 GTAAACGAACAACACTACGACTA 605  
>miR6464 Score: 0.0 R03G\_17255  
Query: 1 TGTTTGCTTGTTGATGTTGAT 21  
||||||||||||||||||||  
Sbjct: 625 ACAACGAACAACACTACAACCTA 605



Query: 1 TGTTTGCTTGTTGATGTTGAT 21  
|:|||||||:|||||||  
Sbjct: 625 ATAAACGAACGACTACAAC TA 605  
>miR6464 Score: 0.5 R03G\_10747  
Query: 1 TGTTTGCTTGTTGATGTTGAT 21  
|:|||||||:|||||||  
Sbjct: 739 ATAAACGAACAAC TAAC TA 719  
>miR6464 Score: 2.2 R03G\_09582  
Query: 1 TGTTTGCTTGTTGATGTTGAT 21  
:\*|||:|||||||\*|  
Sbjct: 106 GAAAATGAACAAC TAAC AA 86  
>miR6464 Score: 2.5 R03G\_08583  
Query: 1 TGTTTGCTTGTTGATGTTGAT 21  
||||\*||\*|:|||||||  
Sbjct: 3479 ACAAAGATCGACTACAAC TA 3459  
>miR6464 Score: 2.5 R03G\_08623  
Query: 1 TGTTTGCTTGTTGATGTTGAT 21  
\*|||:|||||||\*|  
Sbjct: 1195 CCTAACGAACAAC TAAC AA 1175  
>miR6464 Score: 1.0 R03G\_09173  
Query: 1 TGTTTGCTTGTTGATGTTGAT 21  
|:|||||||:|||||||  
Sbjct: 739 ATAAACGAACGACTACAAC TA 719  
>miR6464 Score: 2.0 R03G\_07259  
Query: 1 TGTTTGCTTGTTGATGTTGAT 21  
|||||||\*||:||\*|||  
Sbjct: 2045 ACAACGAACACCTGCA-CTA 2026  
>miR6464 Score: 2.5 R03G\_07291  
Query: 1 TGTTTGCTTGTTGATGTTGAT 21  
||||\*||||\*||||\*|  
Sbjct: 1270 ACAAAGAACAACAAC TAAC TC 1250  
>miR6464 Score: 1.0 R03G\_07862  
Query: 1 TGTTTGCTTGTTGATGTTGAT 21  
|:|||||||:|||||||  
Sbjct: 739 ATAAACGAACGACTACAAC TA 719  
>miR6464 Score: 2.5 R03G\_05698  
Query: 1 TGTTTGCTTGTTGATGTTGAT 21  
||||\*|||||||:||||  
Sbjct: 826 ACAAACAACAAC TAAC TA 806  
>miR6464 Score: 2.5 R03G\_06329  
Query: 1 TGTTTGCTTGTTGATGTTGAT 21  
||:|||||||\*|||\*|  
Sbjct: 355 ACGAACGAACAACAAC TA-GA 336  
>miR6464 Score: 2.5 R03G\_05074  
Query: 1 TGTTTGCTTGTTGATGTTGAT 21

\*||||:||||:|\*|||||  
Sbjct: 1708 TCAAATGAACGACAACA ACTA 1688  
>miR6464 Score: 2.0 R03G\_05389  
Query: 1 TGTTTGCTTGTTGATGTTGAT 21  
|||||||\*||\*|\*|  
Sbjct: 679 ACAAACGAACAACAACA-CAA 660  
>miR6464 Score: 1.8 R03G\_03861  
Query: 1 TGTTTGCTTGTTGATGTTGAT 21  
:||||:|||||||\*||||  
Sbjct: 92 GCAAATGAACA ACTACTACTA 72  
>miR6464 Score: 2.0 R03G\_01193  
Query: 1 TGTTTGCTTGTTGATGTTGAT 21  
|||||||\*||\*|  
Sbjct: 1675 ACAAACGAACA ACTATTACAA 1655  
>miR7541 Score: 2.5 R03G\_10208  
Query: 1 TGCAATGTCTCTTTTGCTGGCAC 23  
|||||||\*|:||\*|\*||  
Sbjct: 629 ACGTTACAGAGATAGCGAAC-TG 608  
>miR7541 Score: 0.0 R03G\_08829  
Query: 1 TGCAATGTCTCTTTTGCTGGCAC 23  
|||||||\*||\*|\*||  
Sbjct: 192 ACGTTACAGAGAAAACGACCGTG 170  
>miR5512a Score: 1.5 R03G\_16725  
Query: 1 TAGGATCATTGTCATGCTAAAAT 23  
|||||||\*||\*|\*|||  
Sbjct: 475 ATCCTAGTAACAGCAGACTTTTA 453  
>miR5512a Score: 2.5 R03G\_16737  
Query: 1 TAGGATCATTGTCATGCT-AAAAT 23  
|\*|||||||:||||||\*||\*|  
Sbjct: 367 AACCTAGTAATAGTACGACTTTCA 344  
>miR5512a Score: 2.0 R03G\_16359  
Query: 1 TAGGATCATTGTCATGCT-AAAAT 23  
|||||||\*|\*||\*|\*|  
Sbjct: 742 ATCCTAGTAACAGTACA ACTTTTT 719  
>miR5512a Score: 2.0 R03G\_16378  
Query: 1 TAGGATCATTGTCATGCT-AAAAT 23  
|||||||\*|\*||\*|\*|  
Sbjct: 211 ATCCTAGTAACAGTACA ACTTTTT 188  
>miR5512a Score: 2.5 R03G\_16541  
Query: 1 TAGGATCATTGTCATGCT-AAAAT 23  
|\*|||||||:||||||\*||\*|  
Sbjct: 367 AACCTAGTAATAGTACGACTTTCA 344  
>miR5512a Score: 2.0 R03G\_16545  
Query: 1 TAGGATCATTGTCATGCT-AAAAT 23  
|||||||\*|\*||\*|\*|

Sbjct: 742 ATCCTAGTAACAGTACAACCTTTTT 719  
>miR5512a Score: 2.5 R03G\_16141  
Query: 1 TAGGATCATTGTCATGCT-AAAAT 23  
|\*|||||||:||||||\*|||\*|

Sbjct: 367 AACCTAGTAATAGTACGACTTTCA 344  
>miR5512a Score: 2.5 R03G\_16124  
Query: 1 TAGGATCATTGTCATGCT-AAAAT 23  
|\*|||||||:||||||\*|||\*|

Sbjct: 367 AACCTAGTAATAGTACGACTTTCA 344  
>miR5512a Score: 1.5 R03G\_15271  
Query: 1 TAGGATCATTGTCATGCTAAAAT 23  
|||||||\*|||\*|||

Sbjct: 733 ATCCTAGTAACAGCACGACTTTA 711  
>miR5512a Score: 2.5 R03G\_15286  
Query: 1 TAGGATCATTGTCATGCT-AAAAT 23  
|\*|||||||:||||||\*|||\*|

Sbjct: 367 AACCTAGTAATAGTACGACTTTCA 344  
>miR5512a Score: 2.5 R03G\_14981  
Query: 1 TAGGATCATTGTCATGCT-AAAAT 23  
|\*|||||||:||||||\*|||\*|

Sbjct: 367 AACCTAGTAATAGTACGACTTTCA 344  
>miR5512a Score: 2.5 R03G\_15145  
Query: 1 TAGGATCATTGTCATGCT-AAAAT 23  
|\*|||||||:||||||\*|||\*|

Sbjct: 367 AACCTAGTAATAGTACGACTTTCA 344  
>miR5512a Score: 2.5 R03G\_15170  
Query: 1 TAGGATCATTGTCATGCT-AAAAT 23  
|\*|||||||:||||||\*|||\*|

Sbjct: 367 AACCTAGTAATAGTACGACTTTCA 344  
>miR5512a Score: 2.5 R03G\_14784  
Query: 1 TAGGATCATTGTCATGCT-AAAAT 23  
|\*|||||||:||||||\*|||\*|

Sbjct: 367 AACCTAGTAATAGTACGACTTTCA 344  
>miR5512a Score: 2.5 R03G\_13752  
Query: 1 TAGGATCATTGTCATGCT-AAAAT 23  
|\*|||||||:||||||\*|||\*|

Sbjct: 367 AACCTAGTAATAGTACGACTTTCA 344  
>miR5512a Score: 0.5 R03G\_13852  
Query: 1 TAGGATCATTGTCATGCTAAAAT 23  
|||||||\*|||

Sbjct: 484 ATCCTAGTAACAGTACGACTTTA 462  
>miR5512a Score: 2.5 R03G\_12950  
Query: 1 TAGGATCATTGTCATGCT-AAAAT 23  
|\*|||||||:||||||\*|||\*|

Sbjct: 367 AACCTAGTAATAGTACGACTTTCA 344

>miR5512a Score: 2.5 R03G\_13267  
Query: 1 TAGGATCATTGTCATGCT-AAAAT 23  
|\*|||||||:||||||\*|||\*|  
Sbjct: 367 AACCTAGTAATAGTACGACTTTCA 344

>miR5512a Score: 2.5 R03G\_12084  
Query: 1 TAGGATCATTGTCATGCT-AAAAT 23  
|\*|||||||:||||||\*|||\*|  
Sbjct: 367 AACCTAGTAATAGTACGACTTTCA 344

>miR5512a Score: 2.5 R03G\_11533  
Query: 1 TAGGATCATTGTCATGCT-AAAAT 23  
|\*|||||||:||||||\*|||\*|  
Sbjct: 367 AACCTAGTAATAGTACGACTTTCA 344

>miR5512a Score: 2.5 R03G\_11536  
Query: 1 TAGGATCATTGTCATGCT-AAAAT 23  
|\*|||||||:||||||\*|||\*|  
Sbjct: 367 AACCTAGTAATAGTACGACTTTCA 344

>miR5512a Score: 1.5 R03G\_10771  
Query: 1 TAGGATCATTGTCATGCTAAAAT 23  
|||||||\*|||\*|  
Sbjct: 484 ATCCTAGTAACAGTACAACCTTTA 462

>miR5512a Score: 2.5 R03G\_10785  
Query: 1 TAGGATCATTGTCATGCT-AAAAT 23  
|\*|||||||:||||||\*|||\*|  
Sbjct: 367 AACCTAGTAATAGTACGACTTTCA 344

>miR5512a Score: 2.5 R03G\_10797  
Query: 1 TAGGATCATTGTCATGCT-AAAAT 23  
|\*|||||||:||||||\*|||\*|  
Sbjct: 367 AACCTAGTAATAGTACGACTTTCA 344

>miR5512a Score: 2.5 R03G\_09926  
Query: 1 TAGGATCATTGTCATGCT-AAAAT 23  
|\*|||||||:||||||\*|||\*|  
Sbjct: 367 AACCTAGTAATAGTACGACTTTCA 344

>miR5512a Score: 2.5 R03G\_10050  
Query: 1 TAGGATCATTGTCATGCT-AAAAT 23  
|\*|||||||:||||||\*|||\*|  
Sbjct: 367 AACCTAGTAATAGTACGACTTTCA 344

>miR5512a Score: 2.5 R03G\_07136  
Query: 1 TAGGATCATTGTCATGCT-AAAAT 23  
|\*|||||||:||||||\*|||\*|  
Sbjct: 58 AACCTAGTAATAGTACGACTTTCA 35

>miR5512a Score: 2.5 R03G\_07723  
Query: 1 TAGGATCATTGTCATGCT-AAAAT 23  
|\*|||||||:||||||\*|||\*|  
Sbjct: 367 AACCTAGTAATAGTACGACTTTCA 344

>miR5512a Score: 1.5 R03G\_07739



|\*|||||||:||||||\*|||\*|  
Sbjct: 367 AACCTAGTAATAGTACGACTTTCA 344  
>miR5512a Score: 2.5 R03G\_02227  
Query: 1 TAGGATCATTGTCATGCT-AAAAT 23  
|\*|||||||:||||||\*|||\*|  
Sbjct: 733 AACCTAGTAATAGTACGACTTTCA 710  
>miR5512a Score: 2.5 R03G\_17423  
Query: 1 TAGGATCATTGTCATGCT-AAAAT 23  
|\*|||||||:||||||\*|||\*|  
Sbjct: 367 AACCTAGTAATAGTACGACTTTCA 344  
>miR5512a Score: 2.5 R03G\_17328  
Query: 1 TAGGATCATTGTCATGCT-AAAAT 23  
|\*|||||||:||||||\*|||\*|  
Sbjct: 367 AACCTAGTAATAGTACGACTTTCA 344  
>miR5512a Score: 2.5 R03G\_17092  
Query: 1 TAGGATCATTGTCATGCT-AAAAT 23  
|\*|||||||:||||||\*|||\*|  
Sbjct: 367 AACCTAGTAATAGTACGACTTTCA 344  
>miR894 Score: 2.5 R03G\_15221  
Query: 1 GTTTCACGTCGGGTTCCACC 19  
|||||\*||||:||||\*|  
Sbjct: 910 CAAAGTTCAGCTTAAGTAG 892  
>miR894 Score: 2.5 R03G\_11316  
Query: 1 GTTTCACGTCGGGTTCCACC 19  
|||:||||:|||||||\*\*  
Sbjct: 1029 CAAGGTGTGGCCCAAGTCC 1011  
>miR894 Score: 2.5 R03G\_10759  
Query: 1 GTTTCACGTCGGGTTCCACC 19  
\*|||||\*||:|:|||||  
Sbjct: 2182 GAAAGTGAAGTCTAAGTGG 2164  
>miR4385 Score: 1.8 R03G\_03357  
Query: 1 TAATGTTGTA AAAAAGGATTGGT 22  
:|||||:|||||||\*\*|  
Sbjct: 1927 GTTACAATATTTTTCCTAA-AA 1907  
>miR4385 Score: 2.5 R03G\_00371  
Query: 1 TAATGTTGTA AAAAAGGATTGGT 22  
|||||:|||||\*|||:|\*||||  
Sbjct: 663 ATTACGACATTATTCTT-ACCA 643  
>miR4385 Score: 2.5 R03G\_16946  
Query: 1 TAATGTTGTA AAAAAGGATTGGT 22  
|||||||\*||\*|:|||||  
Sbjct: 2325 ATTACAACATCTTCCTTAACCA 2304  
>miR5239 Score: 1.8 R03G\_16744  
Query: 1 TGGGAGAAAACATAGGTG 18  
\*|\*|||||||:|



Sbjct: 2998 TCGCTCTTTTGTATCCAT 2981  
>miR5239 Score: 1.8 R03G\_16686  
Query: 1 TGGGAGAAAACATAGGTG 18  
\*|\*|||||||||||||:  
Sbjct: 2839 TCGCTCTTTTGTATCCAT 2822  
>miR5239 Score: 2.2 R03G\_15947  
Query: 1 TGGGAGAAAACATAGGTG 18  
|:||||\*|||||||||::  
Sbjct: 904 ATCCTCGTTTGTATCCGT 887  
>miR5239 Score: 2.2 R03G\_15659  
Query: 1 TGGGAGAAAACATAGGTG 18  
|\*||||\*|||||||||:  
Sbjct: 856 AACCTCGTTTGTATCCAT 839  
>miR5239 Score: 1.8 R03G\_15869  
Query: 1 TGGGAGAAAACATAGGTG 18  
\*|\*|||||||||||||:  
Sbjct: 2998 TCGCTCTTTTGTATCCAT 2981  
>miR5239 Score: 1.8 R03G\_14704  
Query: 1 TGGGAGAAAACATAGGTG 18  
\*|\*|||||||||||||:  
Sbjct: 2839 TCGCTCTTTTGTATCCAT 2822  
>miR5239 Score: 1.8 R03G\_13450  
Query: 1 TGGGAGAAAACATAGGTG 18  
\*|\*|||||||||||||:  
Sbjct: 2656 TCGCTCTTTTGTATCCAT 2639  
>miR5239 Score: 1.8 R03G\_13859  
Query: 1 TGGGAGAAAACATAGGTG 18  
\*|\*|||||||||||||:  
Sbjct: 2623 TCGCTCTTTTGTATCCAT 2606  
>miR5239 Score: 1.8 R03G\_12951  
Query: 1 TGGGAGAAAACATAGGTG 18  
\*|\*|||||||||||||:  
Sbjct: 2839 TCGCTCTTTTGTATCCAT 2822  
>miR5239 Score: 1.8 R03G\_12979  
Query: 1 TGGGAGAAAACATAGGTG 18  
\*|\*|||||||||||||:  
Sbjct: 2839 TCGCTCTTTTGTATCCAT 2822  
>miR5239 Score: 1.8 R03G\_13152  
Query: 1 TGGGAGAAAACATAGGTG 18  
\*|\*|||||||||||||:  
Sbjct: 2839 TCGCTCTTTTGTATCCAT 2822  
>miR5239 Score: 1.8 R03G\_11970  
Query: 1 TGGGAGAAAACATAGGTG 18  
\*|\*|||||||||||||:  
Sbjct: 2539 TCGCTCTTTTGTATCCAT 2522

>miR5239 Score: 2.5 R03G\_11987  
Query: 1 TGGGAGAAAACATAGGTG 18  
||:||||\*||||:||||\*  
Sbjct: 428 ACTCTCTCTTGTGTCCAG 411

>miR5239 Score: 1.8 R03G\_12087  
Query: 1 TGGGAGAAAACATAGGTG 18  
\*|\*|||||||:|  
Sbjct: 2839 TCGCTCTTTTGTATCCAT 2822

>miR5239 Score: 1.8 R03G\_11275  
Query: 1 TGGGAGAAAACATAGGTG 18  
\*|\*|||||||:|  
Sbjct: 2998 TCGCTCTTTTGTATCCAT 2981

>miR5239 Score: 1.8 R03G\_11403  
Query: 1 TGGGAGAAAACATAGGTG 18  
\*|\*|||||||:|  
Sbjct: 2998 TCGCTCTTTTGTATCCAT 2981

>miR5239 Score: 1.8 R03G\_11785  
Query: 1 TGGGAGAAAACATAGGTG 18  
\*|\*|||||||:|  
Sbjct: 1159 TCGCTCTTTTGTATCCAT 1142

>miR5239 Score: 1.8 R03G\_10555  
Query: 1 TGGGAGAAAACATAGGTG 18  
\*|\*|||||||:|  
Sbjct: 2839 TCGCTCTTTTGTATCCAT 2822

>miR5239 Score: 1.8 R03G\_10560  
Query: 1 TGGGAGAAAACATAGGTG 18  
\*|\*|||||||:|  
Sbjct: 2998 TCGCTCTTTTGTATCCAT 2981

>miR5239 Score: 1.8 R03G\_09376  
Query: 1 TGGGAGAAAACATAGGTG 18  
\*|\*|||||||:|  
Sbjct: 2877 TCGCTCTTTTGTATCCAT 2860

>miR5239 Score: 1.8 R03G\_08612  
Query: 1 TGGGAGAAAACATAGGTG 18  
\*|\*|||||||:|  
Sbjct: 2839 TCGCTCTTTTGTATCCAT 2822

>miR5239 Score: 1.8 R03G\_08968  
Query: 1 TGGGAGAAAACATAGGTG 18  
\*|\*|||||||:|  
Sbjct: 553 TCGCTCTTTTGTATCCAT 536

>miR5239 Score: 1.8 R03G\_07305  
Query: 1 TGGGAGAAAACATAGGTG 18  
\*|\*|||||||:|  
Sbjct: 2839 TCGCTCTTTTGTATCCAT 2822

>miR5239 Score: 1.8 R03G\_05630

Query: 1 TGGGAGAAAACATAGGTG 18  
\*|\*|||||: Sbjct: 2758 TCGCTCTTTTGTATCCAT 2741  
>miR5239 Score: 1.8 R03G\_06416  
Query: 1 TGGGAGAAAACATAGGTG 18  
\*|\*|||||: Sbjct: 2998 TCGCTCTTTTGTATCCAT 2981  
>miR5239 Score: 1.8 R03G\_05280  
Query: 1 TGGGAGAAAACATAGGTG 18  
\*|\*|||||: Sbjct: 2839 TCGCTCTTTTGTATCCAT 2822  
>miR5239 Score: 1.8 R03G\_02235  
Query: 1 TGGGAGAAAACATAGGTG 18  
\*|\*|||||: Sbjct: 2182 TCGCTCTTTTGTATCCAT 2165  
>miR5239 Score: 1.8 R03G\_03103  
Query: 1 TGGGAGAAAACATAGGTG 18  
\*|\*|||||: Sbjct: 2839 TCGCTCTTTTGTATCCAT 2822  
>miR5239 Score: 2.5 R03G\_03743  
Query: 1 TGGGAGAAAACATAGGTG 18  
||:||||\*|||:||||\* Sbjct: 437 ACTCTCTCTTGTGTCCAG 420  
>miR5239 Score: 1.8 R03G\_03988  
Query: 1 TGGGAGAAAACATAGGTG 18  
\*|\*|||||: Sbjct: 2839 TCGCTCTTTTGTATCCAT 2822  
>miR5239 Score: 2.2 R03G\_00944  
Query: 1 TGGGAGAAAACATAGGTG 18  
|||||||\*|\*|: Sbjct: 670 ACCCTCTTTTGTATGC-T 654  
>miR5239 Score: 1.8 R03G\_01203  
Query: 1 TGGGAGAAAACATAGGTG 18  
\*|\*|||||: Sbjct: 2998 TCGCTCTTTTGTATCCAT 2981  
>miR5239 Score: 1.8 R03G\_01718  
Query: 1 TGGGAGAAAACATAGGTG 18  
\*|\*|||||: Sbjct: 2998 TCGCTCTTTTGTATCCAT 2981  
>miR5239 Score: 2.5 R03G\_01932  
Query: 1 TGGGAGAAAACATAGGTG 18  
|:|||||||\*||\*| Sbjct: 173 ATCCTCTTTTGTAAACC-C 157  
>miR1076-5p Score: 0.0 R03G\_14532  
Query: 1 TATCACAAGCGCGACTAATTGT 22

|||||  
Sbjct: 1828 ATAGTGTCGCGCTGATTAACA 1807  
>miR1076-5p Score: 0.0 R03G\_14210  
Query: 1 TATCACAAGCGCGACTAATTGT 22  
|||||  
Sbjct: 1221 ATAGTGTCGCGCTGATTAACA 1200  
>miR845a Score: 2.5 R03G\_16081  
Query: 1 CGGCTCTGATACCAATTGAT 20  
\*:|||||\*|||\*||  
Sbjct: 309 TCGAGACTATAGTTAAGTA 290  
>miR845a Score: 2.2 R03G\_05232  
Query: 1 CGGCTCTGATACCAATTGAT 20  
\*:|||\*|||:|  
Sbjct: 873 ATCGAGCCTATGGTTAACTG 854  
>miR5252 Score: 0.2 R03G\_17265  
Query: 1 TTGTAAAGCTACTGAAGTCTGC 22  
|||||:||||  
Sbjct: 139 AACATTTTCGATGACTTCGGACG 118  
>miR5252 Score: 1.2 R03G\_17244  
Query: 1 TTGTAAAGCTACTGAAGTCTGC 22  
|||||\*|||:||||  
Sbjct: 235 AACATTTCAATGACTTCGGACG 214  
>miR5252 Score: 0.2 R03G\_17210  
Query: 1 TTGTAAAGCTACTGAAGTCTGC 22  
|||||:||||  
Sbjct: 262 AACATTTTCGATGACTTCGGACG 241  
>miR5252 Score: 2.2 R03G\_16901  
Query: 1 TTGTAAAGCTACTGAAGTCTGC 22  
|||\*|||:||||  
Sbjct: 232 AACACTTCGATGACTTAGGACG 211  
>miR5252 Score: 2.2 R03G\_16917  
Query: 1 TTGTAAAGCTACTGAAGTCTGC 22  
|||\*|||:||||  
Sbjct: 238 AACACTTCGATGACTTAGGACG 217  
>miR5252 Score: 0.2 R03G\_16743  
Query: 1 TTGTAAAGCTACTGAAGTCTGC 22  
|||||:||||  
Sbjct: 184 AACATTTTCGATGACTTCGGACG 163  
>miR5252 Score: 0.2 R03G\_16369  
Query: 1 TTGTAAAGCTACTGAAGTCTGC 22  
|||||:||||  
Sbjct: 217 AACATTTTCGATGACTTCGGACG 196  
>miR5252 Score: 0.2 R03G\_15887  
Query: 1 TTGTAAAGCTACTGAAGTCTGC 22  
|||||:||||

Sbjct: 262 AACATTTTCGATGACTTCGGACG 241  
>miR5252 Score: 0.2 R03G\_14553  
Query: 1 TTGTAAAGCTACTGAAGTCTGC 22  
|||||:||||  
Sbjct: 238 AACATTTTCGATGACTTCGGACG 217  
>miR5252 Score: 0.2 R03G\_13452  
Query: 1 TTGTAAAGCTACTGAAGTCTGC 22  
|||||:||||  
Sbjct: 214 AACATTTTCGATGACTTCGGACG 193  
>miR5252 Score: 0.0 R03G\_12976  
Query: 1 TTGTAAAGCTACTGAAGTCTGC 22  
|||||:||||  
Sbjct: 241 AACATTTTCGATGACTTCAGACG 220  
>miR5252 Score: 0.2 R03G\_12011  
Query: 1 TTGTAAAGCTACTGAAGTCTGC 22  
|||||:||||  
Sbjct: 238 AACATTTTCGATGACTTCGGACG 217  
>miR5252 Score: 0.2 R03G\_11543  
Query: 1 TTGTAAAGCTACTGAAGTCTGC 22  
|||||:||||  
Sbjct: 238 AACATTTTCGATGACTTCGGACG 217  
>miR5252 Score: 0.2 R03G\_10043  
Query: 1 TTGTAAAGCTACTGAAGTCTGC 22  
|||||:||||  
Sbjct: 232 AACATTTTCGATGACTTCGGACG 211  
>miR5252 Score: 0.2 R03G\_07692  
Query: 1 TTGTAAAGCTACTGAAGTCTGC 22  
|||||:||||  
Sbjct: 172 AACATTTTCGATGACTTCGGACG 151  
>miR5252 Score: 0.2 R03G\_05906  
Query: 1 TTGTAAAGCTACTGAAGTCTGC 22  
|||||:||||  
Sbjct: 175 AACATTTTCGATGACTTCGGACG 154  
>miR5252 Score: 0.2 R03G\_04659  
Query: 1 TTGTAAAGCTACTGAAGTCTGC 22  
|||||:||||  
Sbjct: 172 AACATTTTCGATGACTTCGGACG 151  
>miR5252 Score: 0.2 R03G\_05347  
Query: 1 TTGTAAAGCTACTGAAGTCTGC 22  
|||||:||||  
Sbjct: 238 AACATTTTCGATGACTTCGGACG 217  
>miR5252 Score: 0.2 R03G\_02817  
Query: 1 TTGTAAAGCTACTGAAGTCTGC 22  
|||||:||||  
Sbjct: 241 AACATTTTCGATGACTTCGGACG 220

>miR5252 Score: 0.2 R03G\_01192  
Query: 1 TTGTAAAGCTACTGAAGTCTGC 22  
|||||:||||  
Sbjct: 175 AACATTTTCGATGACTTCGGACG 154

>miR5252 Score: 0.2 R03G\_01717  
Query: 1 TTGTAAAGCTACTGAAGTCTGC 22  
|||||:||||  
Sbjct: 241 AACATTTTCGATGACTTCGGACG 220

>miR5252 Score: 0.2 R03G\_17460  
Query: 1 TTGTAAAGCTACTGAAGTCTGC 22  
|||||:||||  
Sbjct: 262 AACATTTTCGATGACTTCGGACG 241

>miR5252 Score: 0.2 R03G\_17433  
Query: 1 TTGTAAAGCTACTGAAGTCTGC 22  
|||||:||||  
Sbjct: 235 AACATTTTCGATGACTTCGGACG 214

>miR1108 Score: 0.8 R03G\_16906  
Query: 1 TAAGCTGGAAACATAACG-CCC 21  
|||||: \*|||  
Sbjct: 228 ATTCGACCTTTGTATTGTAGGG 207

>miR1108 Score: 0.8 R03G\_13723  
Query: 1 TAAGCTGGAAACATAACG-CCC 21  
|||||: \*|||  
Sbjct: 1059 ATTCGACCTTTGTATTGTAGGG 1038

>miR1108 Score: 0.0 R03G\_10822  
Query: 1 TAAGCTGGAAACATAACGCC 21  
|||||  
Sbjct: 1113 ATTCGACCTTTGTATTGCGGG 1093

>miR1108 Score: 1.2 R03G\_01682  
Query: 1 TAAGCTGGAAACATAACGCC 21  
|||\*|||:|||  
Sbjct: 1005 ATTCAACCTTTGTATTGTGGG 985

>miR5658 Score: 0.0 R03G\_16744  
Query: 1 TGATGATGATGATGTTGCAGAA 22  
|||||  
Sbjct: 3663 ACTACTACTACTACAACGTCTT 3642

>miR5658 Score: 0.0 R03G\_16686  
Query: 1 TGATGATGATGATGTTGCAGAA 22  
|||||  
Sbjct: 3504 ACTACTACTACTACAACGTCTT 3483

>miR5658 Score: 1.5 R03G\_15960  
Query: 1 TGATGATGATGATGTTGCAGAA 22  
|||||\*|\*\*  
Sbjct: 1625 ACTACTACTACTACAACGACAA 1604

>miR5658 Score: 0.0 R03G\_15869

Query: 1 TGATGATGATGATGTTGCAGAA 22  
|||||  
Sbjct: 3663 ACTACTACTACTACAACGTCTT 3642  
>miR5658 Score: 0.0 R03G\_14704

Query: 1 TGATGATGATGATGTTGCAGAA 22  
|||||  
Sbjct: 3504 ACTACTACTACTACAACGTCTT 3483  
>miR5658 Score: 1.2 R03G\_14198

Query: 1 TGATGATGATGATGTTGCAGAA 22  
|||||\*\*:  
Sbjct: 50 ACTACTACTACTACAACCATTT 29  
>miR5658 Score: 2.5 R03G\_13341

Query: 1 TGATGATGATGATGTTGCAGAA 22  
|||||\*||\*\*||\*  
Sbjct: 635 ACTACTACTACTACTACTG 614  
>miR5658 Score: 0.0 R03G\_13450

Query: 1 TGATGATGATGATGTTGCAGAA 22  
|||||  
Sbjct: 3321 ACTACTACTACTACAACGTCTT 3300  
>miR5658 Score: 0.0 R03G\_13859

Query: 1 TGATGATGATGATGTTGCAGAA 22  
|||||  
Sbjct: 3288 ACTACTACTACTACAACGTCTT 3267  
>miR5658 Score: 0.0 R03G\_12979

Query: 1 TGATGATGATGATGTTGCAGAA 22  
|||||  
Sbjct: 3504 ACTACTACTACTACAACGTCTT 3483  
>miR5658 Score: 0.0 R03G\_13152

Query: 1 TGATGATGATGATGTTGCAGAA 22  
|||||  
Sbjct: 3504 ACTACTACTACTACAACGTCTT 3483  
>miR5658 Score: 0.0 R03G\_12087

Query: 1 TGATGATGATGATGTTGCAGAA 22  
|||||  
Sbjct: 3504 ACTACTACTACTACAACGTCTT 3483  
>miR5658 Score: 0.0 R03G\_12193

Query: 1 TGATGATGATGATGTTGCAGAA 22  
|||||  
Sbjct: 510 ACTACTACTACTACAACGTCTT 489  
>miR5658 Score: 0.0 R03G\_11275

Query: 1 TGATGATGATGATGTTGCAGAA 22  
|||||  
Sbjct: 3663 ACTACTACTACTACAACGTCTT 3642  
>miR5658 Score: 0.0 R03G\_11403

Query: 1 TGATGATGATGATGTTGCAGAA 22

|||||  
Sbjct: 3663 ACTACTACTACTACAACGTCTT 3642  
>miR5658 Score: 0.0 R03G\_10555  
Query: 1 TGATGATGATGATGTTGCAGAA 22  
|||||  
Sbjct: 3504 ACTACTACTACTACAACGTCTT 3483  
>miR5658 Score: 0.0 R03G\_10560  
Query: 1 TGATGATGATGATGTTGCAGAA 22  
|||||  
Sbjct: 3663 ACTACTACTACTACAACGTCTT 3642  
>miR5658 Score: 0.0 R03G\_08612  
Query: 1 TGATGATGATGATGTTGCAGAA 22  
|||||  
Sbjct: 3504 ACTACTACTACTACAACGTCTT 3483  
>miR5658 Score: 0.0 R03G\_07305  
Query: 1 TGATGATGATGATGTTGCAGAA 22  
|||||  
Sbjct: 3504 ACTACTACTACTACAACGTCTT 3483  
>miR5658 Score: 2.5 R03G\_07545  
Query: 1 TGATGATGATGATGTTGCAGAA 22  
\*|||||\*||\*||\*|  
Sbjct: 468 CCTACTACTACTACTACCTCGT 447  
>miR5658 Score: 2.5 R03G\_07768  
Query: 1 TGATGATGATGATGTTGCAGAA 22  
|:||||:||||\*||\*|||  
Sbjct: 881 ATTACTATTACTAAAAC-TCTT 861  
>miR5658 Score: 0.0 R03G\_05630  
Query: 1 TGATGATGATGATGTTGCAGAA 22  
|||||  
Sbjct: 3423 ACTACTACTACTACAACGTCTT 3402  
>miR5658 Score: 0.0 R03G\_06416  
Query: 1 TGATGATGATGATGTTGCAGAA 22  
|||||  
Sbjct: 3663 ACTACTACTACTACAACGTCTT 3642  
>miR5658 Score: 2.0 R03G\_06536  
Query: 1 TGATGATGATGATGTTGCAGAA 22  
|||||\*\*|\*\*  
Sbjct: 416 ACTACTACTACTACAACAACAA 395  
>miR5658 Score: 2.5 R03G\_06611  
Query: 1 TGATGATGATGATGTTGCAGAA 22  
|||||\*||\*\*|\*|  
Sbjct: 459 ACTACTACTACTACCACACCGT 438  
>miR5658 Score: 2.5 R03G\_05207  
Query: 1 TGATGATGATGATGTTGCAGAA 22  
|||||\*||\*\*|\*|



Sbjct: 956 ACTACTACTACTACTACTG 935  
>miR5658 Score: 0.0 R03G\_05280  
Query: 1 TGATGATGATGATGTTGCAGAA 22  
|||||

Sbjct: 3504 ACTACTACTACTACAACGTCTT 3483  
>miR5658 Score: 0.0 R03G\_02235  
Query: 1 TGATGATGATGATGTTGCAGAA 22  
|||||

Sbjct: 2847 ACTACTACTACTACAACGTCTT 2826  
>miR5658 Score: 2.5 R03G\_03011  
Query: 1 TGATGATGATGATGTTGCAGAA 22  
|||||\*||\*\*||\*

Sbjct: 401 ACTACTACTACTACTGCTG 380  
>miR5658 Score: 2.5 R03G\_03075  
Query: 1 TGATGATGATGATGTTGCAGAA 22  
|||||\*||\*\*||\*

Sbjct: 1091 ACTACTACTACTACCTACTA 1070  
>miR5658 Score: 0.0 R03G\_03103  
Query: 1 TGATGATGATGATGTTGCAGAA 22  
|||||

Sbjct: 3504 ACTACTACTACTACAACGTCTT 3483  
>miR5658 Score: 2.5 R03G\_03827  
Query: 1 TGATGATGATGATGTTGCAGAA 22  
|||||\*||\*\*||\*

Sbjct: 1085 ACTACTACTACTACTACTA 1064  
>miR5658 Score: 2.5 R03G\_03866  
Query: 1 TGATGATGATGATGTTGCAGAA 22  
|||||\*|\*\*\*|

Sbjct: 110 ACTACTACTACTACAA-GAAGT 90  
>miR5658 Score: 0.0 R03G\_03990  
Query: 1 TGATGATGATGATGTTGCAGAA 22  
|||||

Sbjct: 261 ACTACTACTACTACAACGTCTT 240  
>miR5658 Score: 2.5 R03G\_04007  
Query: 1 TGATGATGATGATGTTGCAGAA 22  
|\*|||||:||\*||\*

Sbjct: 1097 AATACTACTACTACGACGACTA 1076  
>miR5658 Score: 2.5 R03G\_00266  
Query: 1 TGATGATGATGATGTTGCAGAA 22  
|||||\*||\*||\*\*

Sbjct: 1226 ACTACTACTACTACTAC-TCCC 1206  
>miR5658 Score: 2.5 R03G\_00272  
Query: 1 TGATGATGATGATGTTGCAGAA 22  
\*:|||||:||\*||\*

Sbjct: 5961 TTTACTACTACTACGACCTCTA 5940

>miR5658 Score: 2.5 R03G\_00729  
Query: 1 TGATGATGATGATGTTGCAGAA 22  
|||||\*||\*\*||\*  
Sbjct: 1070 ACTACTACTACTACTACTA 1049

>miR5658 Score: 2.5 R03G\_00853  
Query: 1 TGATGATGATGATGTTGCAGAA 22  
|||||:|\*\*|\*\*  
Sbjct: 1100 ACTACTACTACTACGACAACAA 1079

>miR5658 Score: 0.0 R03G\_01203  
Query: 1 TGATGATGATGATGTTGCAGAA 22  
|||||  
Sbjct: 3663 ACTACTACTACTACAACGTCTT 3642

>miR5658 Score: 2.0 R03G\_01410  
Query: 1 TGATGATGATGATGTTGCAGAA 22  
|||||\*||\*||\*||  
Sbjct: 462 ACTACTACTACTACTAC-TATT 442

>miR5658 Score: 0.0 R03G\_01718  
Query: 1 TGATGATGATGATGTTGCAGAA 22  
|||||  
Sbjct: 3663 ACTACTACTACTACAACGTCTT 3642

>miR5658 Score: 2.0 R03G\_16962  
Query: 1 TGATGATGATGATGTTGCAGAA 22  
|||||\*||\*||\*||  
Sbjct: 410 ACTACTACTACTACTACCTGTT 389

>miR8034 Score: 2.0 R03G\_16738  
Query: 1 TATGACAAGCCTGCACAAACT 21  
|||||\*|||\*|||  
Sbjct: 685 ATACTGTCCGGACATGTTTGA 665

>miR8034 Score: 2.0 R03G\_16138  
Query: 1 TATGACAAGCCTGCACAAACT 21  
|||||\*|||\*|||  
Sbjct: 1768 ATACTGTCCGGACATGTTTGA 1748

>miR8034 Score: 1.0 R03G\_15580  
Query: 1 TATGACAAGCCTGCACAAACT 21  
|||||\*|||  
Sbjct: 1732 ATACTGTCCGGACGTGTTTGA 1712

>miR8034 Score: 2.0 R03G\_14626  
Query: 1 TATGACAAGCCTGCACAAACT 21  
|||||\*|||\*|||  
Sbjct: 1768 ATACTGTCCGGACATGTTTGA 1748

>miR8034 Score: 2.0 R03G\_14710  
Query: 1 TATGACAAGCCTGCACAAACT 21  
|||||\*|||\*|||  
Sbjct: 1768 ATACTGTCCGGACATGTTTGA 1748

>miR8034 Score: 2.2 R03G\_13747

Query: 1 TATGACAAGCCTGCACAACT 21  
||||||\*||||\*|||||:  
Sbjct: 1768 ATACTGTCCGGACATGTTTGG 1748  
>miR8034 Score: 2.0 R03G\_13148  
Query: 1 TATGACAAGCCTGCACAACT 21  
||||||\*||||\*|||||:  
Sbjct: 1501 ATACTGTCCGGACATGTTTGA 1481  
>miR8034 Score: 2.2 R03G\_12009  
Query: 1 TATGACAAGCCTGCACAACT 21  
||||||\*||||\*|||||:  
Sbjct: 1768 ATACTGTCCGGACATGTTTGG 1748  
>miR8034 Score: 2.0 R03G\_12072  
Query: 1 TATGACAAGCCTGCACAACT 21  
||||||\*||||\*|||||:  
Sbjct: 1768 ATACTGTCCGGACATGTTTGA 1748  
>miR8034 Score: 2.0 R03G\_12169  
Query: 1 TATGACAAGCCTGCACAACT 21  
||||||\*||||\*|||||:  
Sbjct: 1768 ATACTGTCCGGACATGTTTGA 1748  
>miR8034 Score: 2.2 R03G\_11404  
Query: 1 TATGACAAGCCTGCACAACT 21  
||||||\*||||\*|||||:  
Sbjct: 1768 ATACTGTCCGGACATGTTTGG 1748  
>miR8034 Score: 1.0 R03G\_11531  
Query: 1 TATGACAAGCCTGCACAACT 21  
||||||\*||||\*|||||:  
Sbjct: 1261 ATACTGTCCGGACGTGTTTGA 1241  
>miR8034 Score: 2.0 R03G\_11771  
Query: 1 TATGACAAGCCTGCACAACT 21  
||||||\*||||\*|||||:  
Sbjct: 1768 ATACTGTCCGGACATGTTTGA 1748  
>miR8034 Score: 2.0 R03G\_10522  
Query: 1 TATGACAAGCCTGCACAACT 21  
||||||\*||||\*|||||:  
Sbjct: 1732 ATACTGTCCGGACATGTTTGA 1712  
>miR8034 Score: 2.0 R03G\_10725  
Query: 1 TATGACAAGCCTGCACAACT 21  
||||||\*||||\*|||||:  
Sbjct: 1732 ATACTGTCCGGACATGTTTGA 1712  
>miR8034 Score: 2.0 R03G\_09940  
Query: 1 TATGACAAGCCTGCACAACT 21  
||||||\*||||\*|||||:  
Sbjct: 1768 ATACTGTCCGGACATGTTTGA 1748  
>miR8034 Score: 0.0 R03G\_08042  
Query: 1 TATGACAAGCCTGCACAACT 21

|||||  
Sbjct: 1300 ATACTGTTCGGACGTGTTTGA 1280  
>miR8034 Score: 2.0 R03G\_07128  
Query: 1 TATGACAAGCCTGCACAAACT 21  
|||||\*|||||\*|||||  
Sbjct: 286 ATACTGTCCGGACATGTTTGA 266  
>miR8034 Score: 2.0 R03G\_07294  
Query: 1 TATGACAAGCCTGCACAAACT 21  
|||||\*|||||\*|||||  
Sbjct: 1369 ATACTGTCCGGACATGTTTGA 1349  
>miR8034 Score: 2.0 R03G\_07686  
Query: 1 TATGACAAGCCTGCACAAACT 21  
|||||\*|||||\*|||||  
Sbjct: 1768 ATACTGTCCGGACATGTTTGA 1748  
>miR8034 Score: 1.0 R03G\_07976  
Query: 1 TATGACAAGCCTGCACAAACT 21  
|||||\*|||||\*|||||  
Sbjct: 1765 ATACTGTTCGGACATGTTTGA 1745  
>miR8034 Score: 2.0 R03G\_05958  
Query: 1 TATGACAAGCCTGCACAAACT 21  
|||||\*|||||\*|||||  
Sbjct: 1732 ATACTGTCCGGACATGTTTGA 1712  
>miR8034 Score: 2.0 R03G\_06430  
Query: 1 TATGACAAGCCTGCACAAACT 21  
|||||\*|||||\*|||||  
Sbjct: 1732 ATACTGTCCGGACATGTTTGA 1712  
>miR8034 Score: 2.0 R03G\_04785  
Query: 1 TATGACAAGCCTGCACAAACT 21  
|||||\*|||||\*|||||  
Sbjct: 1732 ATACTGTCCGGACATGTTTGA 1712  
>miR8034 Score: 2.0 R03G\_03555  
Query: 1 TATGACAAGCCTGCACAAACT 21  
|||||\*|||||\*|||||  
Sbjct: 1768 ATACTGTCCGGACATGTTTGA 1748  
>miR8034 Score: 1.0 R03G\_03580  
Query: 1 TATGACAAGCCTGCACAAACT 21  
|||||\*|||||\*|||||  
Sbjct: 1693 ATACTGTCCGGACGTGTTTGA 1673  
>miR8034 Score: 1.0 R03G\_03589  
Query: 1 TATGACAAGCCTGCACAAACT 21  
|||||\*|||||\*|||||  
Sbjct: 1693 ATACTGTCCGGACGTGTTTGA 1673  
>miR8034 Score: 2.0 R03G\_01309  
Query: 1 TATGACAAGCCTGCACAAACT 21  
|||||\*|||||\*|||||

Sbjct: 1717 ATACTGTCCGGACATGTTTGA 1697  
>miR8034 Score: 2.0 R03G\_01740  
Query: 1 TATGACAAGCCTGCACAAACT 21  
||||||\*||||\*||||||  
Sbjct: 1732 ATACTGTCCGGACATGTTTGA 1712  
>miR8034 Score: 2.0 R03G\_01954  
Query: 1 TATGACAAGCCTGCACAAACT 21  
||||||\*||||\*||||||  
Sbjct: 718 ATACTGTCCGGACATGTTTGA 698  
>miR8034 Score: 2.0 R03G\_17441  
Query: 1 TATGACAAGCCTGCACAAACT 21  
||||||\*||||\*||||||  
Sbjct: 1495 ATACTGTCCGGACATGTTTGA 1475  
>miR8034 Score: 2.0 R03G\_17385  
Query: 1 TATGACAAGCCTGCACAAACT 21  
||||||\*||||\*||||||  
Sbjct: 1768 ATACTGTCCGGACATGTTTGA 1748  
>miR8034 Score: 2.0 R03G\_17358  
Query: 1 TATGACAAGCCTGCACAAACT 21  
||||||\*||||\*||||||  
Sbjct: 1768 ATACTGTCCGGACATGTTTGA 1748  
>miR5506 Score: 0.0 R03G\_16708  
Query: 1 TAGATCGCTTCGTTGAGG 18  
|||||||  
Sbjct: 677 ATCTAGCGAAGCAACTCC 660  
>miR5506 Score: 0.0 R03G\_13745  
Query: 1 TAGATCGCTTCGTTGAGG 18  
|||||||  
Sbjct: 677 ATCTAGCGAAGCAACTCC 660  
>miR5506 Score: 0.0 R03G\_12669  
Query: 1 TAGATCGCTTCGTTGAGG 18  
|||||||  
Sbjct: 677 ATCTAGCGAAGCAACTCC 660  
>miR5506 Score: 0.2 R03G\_12961  
Query: 1 TAGATCGCTTCGTTGAGG 18  
|||||||  
Sbjct: 1010 ATCTAGCGAAGCAACTCT 993  
>miR5506 Score: 0.0 R03G\_12964  
Query: 1 TAGATCGCTTCGTTGAGG 18  
|||||||  
Sbjct: 677 ATCTAGCGAAGCAACTCC 660  
>miR5506 Score: 0.0 R03G\_12075  
Query: 1 TAGATCGCTTCGTTGAGG 18  
|||||||  
Sbjct: 677 ATCTAGCGAAGCAACTCC 660

>miR5506 Score: 0.0 R03G\_11952  
Query: 1 TAGATCGCTTCGTTGAGG 18  
|||||  
Sbjct: 1055 ATCTAGCGAAGCAACTCC 1038

>miR5506 Score: 0.5 R03G\_09927  
Query: 1 TAGATCGCTTCGTTGAGG 18  
|||||:|||||  
Sbjct: 677 ATCTAGCGGAGCAACTCC 660

>miR5506 Score: 1.8 R03G\_09951  
Query: 1 TAGATCGCTTCGTTGAGG 18  
|||||:|\*|  
Sbjct: 935 ATCTAGCGAAGTAAGTCT 918

>miR5506 Score: 2.5 R03G\_08587  
Query: 1 TAGATCGCTTCGTTGAGG 18  
|||||\*||\*|||\*  
Sbjct: 1023 ATCTAGAGAAACAACACTCA 1006

>miR5506 Score: 2.0 R03G\_08754  
Query: 1 TAGATCGCTTCGTTGAGG 18  
|||||:|||||\*|\*  
Sbjct: 5295 ATCTAGTGAAGCAAGTCG 5278

>miR5506 Score: 0.0 R03G\_05524  
Query: 1 TAGATCGCTTCGTTGAGG 18  
|||||  
Sbjct: 677 ATCTAGCGAAGCAACTCC 660

>miR5506 Score: 0.2 R03G\_05925  
Query: 1 TAGATCGCTTCGTTGAGG 18  
|||||  
Sbjct: 677 ATCTAGCGAAGCAACTCT 660

>miR5506 Score: 0.2 R03G\_05927  
Query: 1 TAGATCGCTTCGTTGAGG 18  
|||||  
Sbjct: 677 ATCTAGCGAAGCAACTCT 660

>miR5506 Score: 2.5 R03G\_02307  
Query: 1 TAGATCGCTTCGTTGAGG 18  
\*\*|||||\*||  
Sbjct: 713 CGCTAGCGAAGCAAGTCC 696

>miR5506 Score: 1.8 R03G\_00927  
Query: 1 TAGATCGCTTCGTTGAGG 18  
|||||\*|||:  
Sbjct: 625 ATCTAGCGAAGGAACTTT 608

>miR9752 Score: 0.0 R03G\_15283  
Query: 1 TGCTTCTTGCTGTTCCATGATTT 23  
|||||  
Sbjct: 261 ACGAAGAACGACAAGGTACTAAA 239

>miR9752 Score: 0.0 R03G\_10526

Query: 1 TGCTTCTTGCTGTTCCATGATTT 23  
|||||  
Sbjct: 261 ACGAAGAACGACAAGGTACTAAA 239  
>miR9752 Score: 0.0 R03G\_09197

Query: 1 TGCTTCTTGCTGTTCCATGATTT 23  
|||||  
Sbjct: 261 ACGAAGAACGACAAGGTACTAAA 239  
>miR9752 Score: 0.0 R03G\_09934

Query: 1 TGCTTCTTGCTGTTCCATGATTT 23  
|||||  
Sbjct: 261 ACGAAGAACGACAAGGTACTAAA 239  
>miR9752 Score: 0.0 R03G\_07109

Query: 1 TGCTTCTTGCTGTTCCATGATTT 23  
|||||  
Sbjct: 261 ACGAAGAACGACAAGGTACTAAA 239  
>miR9752 Score: 0.0 R03G\_07672

Query: 1 TGCTTCTTGCTGTTCCATGATTT 23  
|||||  
Sbjct: 261 ACGAAGAACGACAAGGTACTAAA 239  
>miR9752 Score: 2.5 R03G\_06295

Query: 1 TGCTTCTTGCTGTTCCATGATTT 23  
|:|||||\*||||\*|||||  
Sbjct: 2737 ATGAAGAACGAAAAGGGACTAAA 2715  
>miR9752 Score: 2.2 R03G\_04795

Query: 1 TGCTTCTTGCTGTTCCA-TGATTT 23  
|||||\*||||\*|:||||  
Sbjct: 312 ACGAAGAACGAAAAGGTTATTAAA 289  
>miR9752 Score: 0.0 R03G\_02835

Query: 1 TGCTTCTTGCTGTTCCATGATTT 23  
|||||  
Sbjct: 261 ACGAAGAACGACAAGGTACTAAA 239  
>miR9752 Score: 2.5 R03G\_00450

Query: 1 TGCTTCTTGCTGTTCCATGATTT 23  
|||||\*||||\*||\*|||  
Sbjct: 2446 ACGAAGAACGAAAAGGAACGAAA 2424  
>miR9752 Score: 0.0 R03G\_01312

Query: 1 TGCTTCTTGCTGTTCCATGATTT 23  
|||||  
Sbjct: 42 ACGAAGAACGACAAGGTACTAAA 20  
>miR9752 Score: 0.0 R03G\_01935

Query: 1 TGCTTCTTGCTGTTCCATGATTT 23  
|||||  
Sbjct: 261 ACGAAGAACGACAAGGTACTAAA 239  
>miR5369 Score: 2.5 R03G\_15932

Query: 1 TCAAGAAAAGGAGGATGTCCAT 22

|||||\*|||:\*\*\*  
Sbjct: 1706 AGTTCTTTTCATCCTATTGGTC 1685  
>miR5369 Score: 2.5 R03G\_09088  
Query: 1 TCAAGAAAAGGAGGATGTCCAT 22  
|\*|||||\*||\*||  
Sbjct: 263 AATTCTTTTCCTCCTA-AGCTA 243  
>miR5369 Score: 1.5 R03G\_05532  
Query: 1 TCAAGAAAAGGAGGATGTCCAT 22  
|||:|||||:|\*||  
Sbjct: 698 AGTTTTTTTCCTCCTATAGATA 677  
>miR5369 Score: 2.5 R03G\_04367  
Query: 1 TCAAGAAAAGGAGGATGTCCAT 22  
|||:\*|||||:||||\*  
Sbjct: 824 AGTTTCTTTCTCCTATAGGTC 803  
>miR1072 Score: 1.2 R03G\_16566  
Query: 1 TATTGTTGTTATTTGAGCTTGG 22  
|||||:|||:||||:  
Sbjct: 1410 ATAACAACAATAGACTTGA ACT 1389  
>miR1072 Score: 2.2 R03G\_15852  
Query: 1 TATTGTTGTTATTTGAGCT-TGG 22  
|||||:|||||:||:|\*||:  
Sbjct: 604 ATAACGACAATAAGCTTGATACT 582  
>miR1072 Score: 2.5 R03G\_15543  
Query: 1 TATTGTTGTTATTTGAGCTTGG 22  
|||||:||:|||||:\*\*\*||:  
Sbjct: 1075 ATAATAATAATAAACTT-AATT 1055  
>miR1072 Score: 0.0 R03G\_15574  
Query: 1 TATTGTTGTTATTTGAGCTTGG 22  
|||||  
Sbjct: 1425 ATAACAACAATAAACTCGAACC 1404  
>miR1072 Score: 1.2 R03G\_14533  
Query: 1 TATTGTTGTTATTTGAGCTTGG 22  
|||||:|||:||||:  
Sbjct: 1215 ATAACAACAATAGACTTGA ACT 1194  
>miR1072 Score: 2.5 R03G\_14612  
Query: 1 TATTGTTGTTATTTGAGCTTGG 22  
:|||:|||||\*||\*||  
Sbjct: 70 GTAATAACAATAAACACGGCCC 49  
>miR1072 Score: 1.2 R03G\_13806  
Query: 1 TATTGTTGTTATTTGAGCTTGG 22  
|||||:|||:||||:  
Sbjct: 1410 ATAACAACAATAGACTTGA ACT 1389  
>miR1072 Score: 2.5 R03G\_06196  
Query: 1 TATTGTTGTTATTTGAGCT-TGG 22  
:|||||:|:|||||\*:\*|



Sbjct: 229 GTAACAATAGTAAACTCGATGGC 207  
>miR1072 Score: 1.8 R03G\_03093  
Query: 1 TATTGTTGTTATTTGAGCTTGG 22  
:|||||\*|||\*|  
Sbjct: 435 GTAACAACAATAAACT-GAAGC 415  
>miR1072 Score: 1.2 R03G\_03120  
Query: 1 TATTGTTGTTATTTGAGCTTGG 22  
|||||:|:|:|:  
Sbjct: 1410 ATAACAACAATAGACTTGA ACT 1389  
>miR1072 Score: 1.2 R03G\_01425  
Query: 1 TATTGTTGTTATTTGAGCTTGG 22  
|||||:|:|:|:  
Sbjct: 1410 ATAACAACAATAGACTTGA ACT 1389  
>miR2105 Score: 2.2 R03G\_13442  
Query: 1 TTGTGATTTGTGAATGGTTGAT 22  
:||||:|||||:||||\*\*|  
Sbjct: 621 GACACTGAACACTTGCCAAGAA 600  
>miR2105 Score: 2.2 R03G\_13216  
Query: 1 TTGTGATTTGTGAATGGTTGAT 22  
:||||:|||||:||||\*\*|  
Sbjct: 237 GACACTGAACACTTGCCAAGAA 216  
>miR2105 Score: 2.5 R03G\_07019  
Query: 1 TTGTGATTTGTGAATGGTTGAT 22  
|||||\*|||\*|\*|:|:|:  
Sbjct: 144 AACACTAAACACTTCC-GACTG 124  
>miR2105 Score: 2.5 R03G\_00035  
Query: 1 TTGTGATTTGTGAATGGTTGAT 22  
:|||||:|||||\*|\*|\*|  
Sbjct: 261 GACACTAAATACTTACTTATCA 240  
>miR9760 Score: 2.5 R03G\_14120  
Query: 1 TGATGATGTAGTCTTGATTGGT 22  
:|||||:|\*||:|\*|  
Sbjct: 154 GCTACTACATCAGGAGTAGCGA 133  
>miR9760 Score: 2.0 R03G\_11395  
Query: 1 TGATGATGTAGTCTTGATTGGT 22  
||||\*|||:|||||\*||  
Sbjct: 577 ACTACAACATTAGAACTAAACA 556  
>miR398b-3p Score: 2.5 R03G\_04368  
Query: 1 ATGTGTTCTCAGGTCACCCCT 21  
|||||:||||\*\*\*||  
Sbjct: 2694 TACACAAGAGTTCAGT-CAGA 2675  
>miR5260 Score: 2.5 R03G\_15050  
Query: 1 TGTTGTATTGATGACTGGCTAT 22  
|\*|||||\*||||\*|||  
Sbjct: 55 AAAACATAACA ACTGAC-GATA 35

>miR5260 Score: 2.5 R03G\_14415  
Query: 1 TGTTGTATTGATGACTGGCTAT 22  
\*|||||||:|\*|||\*|||  
Sbjct: 591 CCAACATAACTATGGACC-ATA 571

>miR5260 Score: 2.5 R03G\_01220  
Query: 1 TGTTGTATTGATGACTGGCTAT 22  
\*:|||||||\*|||\*|||  
Sbjct: 3132 CTAACATAACTACTAACC-ATA 3112

>miR169f-3p Score: 2.5 R03G\_16614  
Query: 1 TGATGTCTTCCTTTGGTTACT 21  
:|||\*|||||||:|\*|||:  
Sbjct: 154 GCTAAAGAAGGAAACCG-TGG 135

>miR169f-3p Score: 2.0 R03G\_15960  
Query: 1 TGATGTCTTCCTTTGGTTACT 21  
|:||\*|||||||\*|||  
Sbjct: 592 ATTAAAGAAGGAAACCAA-GA 573

>miR169f-3p Score: 2.5 R03G\_15382  
Query: 1 TGATGTCTTCCTTTGGTTACT 21  
|||||||:|\*|||||||\*|||  
Sbjct: 2320 ACTACAGGAAGAAACCAA-AA 2301

>miR169f-3p Score: 2.5 R03G\_14833  
Query: 1 TGATGTCTTCCTTTGGTTACT 21  
|:|||||||\*|||||||\*|||  
Sbjct: 538 ATTACAGAAGTAAACCACT-A 519

>miR169f-3p Score: 2.2 R03G\_15222  
Query: 1 TGATGTCTTCCTTTGGTTACT 21  
|||||:|||||||:|\*||\*  
Sbjct: 1801 ACTACGGAAGGAAACTAG-GT 1782

>miR169f-3p Score: 2.5 R03G\_09894  
Query: 1 TGATGTCTTCCTTTGGTT-ACT 21  
|:|:|||||||\*|||||||\*|||  
Sbjct: 1408 ATTGCAGAAGAAAACCAAGTGA 1387

>miR168 Score: 2.5 R03G\_16003  
Query: 1 TCGCTTGGTGCAGGTCGGGA 20  
|\*|||||\*|||||||\*  
Sbjct: 2980 ATCGAACAAACGTCCAGCCCC 2961

>miR9558-3p Score: 0.0 R03G\_15577  
Query: 1 TTGCAAGGCCAGCTTTTCCTCT 22  
|||||||  
Sbjct: 318 AACGTTCCGGTCGAAAAGGAGA 297

>miR9558-3p Score: 0.0 R03G\_14625  
Query: 1 TTGCAAGGCCAGCTTTTCCTCT 22  
|||||||  
Sbjct: 318 AACGTTCCGGTCGAAAAGGAGA 297

>miR9558-3p Score: 0.0 R03G\_13150

Query: 1 TTGCAAGGCCAGCTTTTCCTCT 22  
|||||  
Sbjct: 39 AACGTTCCGGTCGAAAAGGAGA 18  
>miR9558-3p Score: 0.0 R03G\_11530  
Query: 1 TTGCAAGGCCAGCTTTTCCTCT 22  
|||||  
Sbjct: 318 AACGTTCCGGTCGAAAAGGAGA 297  
>miR9558-3p Score: 0.0 R03G\_10519  
Query: 1 TTGCAAGGCCAGCTTTTCCTCT 22  
|||||  
Sbjct: 318 AACGTTCCGGTCGAAAAGGAGA 297  
>miR9558-3p Score: 2.5 R03G\_08428  
Query: 1 TTGCAAGGCCAGCTTTTCCTCT 22  
|||||\*\*|||||\*|||  
Sbjct: 318 AACGTTCCGAACGAAAAGAAGA 297  
>miR9558-3p Score: 0.0 R03G\_07107  
Query: 1 TTGCAAGGCCAGCTTTTCCTCT 22  
|||||  
Sbjct: 318 AACGTTCCGGTCGAAAAGGAGA 297  
>miR9558-3p Score: 0.0 R03G\_05957  
Query: 1 TTGCAAGGCCAGCTTTTCCTCT 22  
|||||  
Sbjct: 318 AACGTTCCGGTCGAAAAGGAGA 297  
>miR9558-3p Score: 0.0 R03G\_04783  
Query: 1 TTGCAAGGCCAGCTTTTCCTCT 22  
|||||  
Sbjct: 180 AACGTTCCGGTCGAAAAGGAGA 159  
>miR9558-3p Score: 2.0 R03G\_02685  
Query: 1 TTGCAAGGCCAGCTTTTCCTCT 22  
|||||\*|\*|||||  
Sbjct: 39 AACGTTCCGGACAAAAGGAGA 18  
>miR9558-3p Score: 0.0 R03G\_03097  
Query: 1 TTGCAAGGCCAGCTTTTCCTCT 22  
|||||  
Sbjct: 318 AACGTTCCGGTCGAAAAGGAGA 297  
>miR9558-3p Score: 0.0 R03G\_03579  
Query: 1 TTGCAAGGCCAGCTTTTCCTCT 22  
|||||  
Sbjct: 318 AACGTTCCGGTCGAAAAGGAGA 297  
>miR9558-3p Score: 2.0 R03G\_04093  
Query: 1 TTGCAAGGCCAGCTTTTCCTCT 22  
|||||:|\*|||\*  
Sbjct: 1332 AACGTTCCGGTCGAGGAAGAGT 1311  
>miR9558-3p Score: 2.5 R03G\_00117  
Query: 1 TTGCAAGGCCAGCTTTTC-CTCT 22

```
|||||*|||||***||
Sbjct: 115 AACGTTGCGGTCGAAAAGATCGA 93
>miR9558-3p Score: 0.0 R03G_01734
Query: 1 TTGCAAGGCCAGCTTTTCCTCT 22
|||||
Sbjct: 318 AACGTTCCGGTCGAAAAGGAGA 297
>miR9558-3p Score: 0.0 R03G_17440
Query: 1 TTGCAAGGCCAGCTTTTCCTCT 22
|||||
Sbjct: 318 AACGTTCCGGTCGAAAAGGAGA 297
>miR2633 Score: 2.5 R03G_08201
Query: 1 TCGACATTTGCACCAGATTCT 21
|*|||||*|||||*|||
Sbjct: 365 ATCTGTAACCGTGGTCTCAGA 345
>miR2633 Score: 2.2 R03G_00832
Query: 1 TCGACATTTGCACCAGATTCT 21
|||||:|||*|||||:|*|
Sbjct: 307 AGCTGTAGACGAGGTCTGA-A 288
>miR2633 Score: 2.5 R03G_01808
Query: 1 TCGACATTTGCACCAGATTCT 21
**|||||*|||||
Sbjct: 6977 TACTGTAATCGTGGTCTAAGA 6957
>miR6155 Score: 0.0 R03G_14837
Query: 1 TGAGTTGCCTGTGCCTTGCA 20
|||||
Sbjct: 38 ACTCAACGGACACGGAACGT 19
>miR6155 Score: 0.0 R03G_08656
Query: 1 TGAGTTGCCTGTGCCTTGCA 20
|||||
Sbjct: 260 ACTCAACGGACACGGAACGT 241
>miR6155 Score: 0.0 R03G_00488
Query: 1 TGAGTTGCCTGTGCCTTGCA 20
|||||
Sbjct: 38 ACTCAACGGACACGGAACGT 19
>miR394a-3p Score: 2.5 R03G_16787
Query: 1 TGTTGTCATCTCTTTTGTA 20
|||::|||||:|*|||||
Sbjct: 280 ACAGTAGTAGAGGACACATT 261
>miR394a-3p Score: 2.5 R03G_16640
Query: 1 TGTTGTCATCTCTTTTGTA 20
|||||*|||||*
Sbjct: 83 ACAACTTTAGAGAAAACATG 64
>miR394a-3p Score: 2.5 R03G_16302
Query: 1 TGTTGTCATCTCTTTTGTA-A 20
|:|||||*||||:||||*|
```



>miR394a-3p Score: 2.0 R03G\_01624  
Query: 1 TGTTGTCATCTCTTTTGTA-A 20  
|||||||\*:\*|||\*|  
Sbjct: 882 ACAACAGTAGAGTGAACATGT 862

>miR394a-3p Score: 2.5 R03G\_01975  
Query: 1 TGTTGTCATCTCTTTTGTA 20  
|||:||||\*||||||\*\*  
Sbjct: 1617 ACAATAGTATAGAAAACACC 1598

>miR915 Score: 0.0 R03G\_17033  
Query: 1 TGGCAATAAGGACAACGTCGTC 22  
|||||||  
Sbjct: 697 ACCGTTATTCCTGTTGCAGCAG 676

>miR915 Score: 1.0 R03G\_14836  
Query: 1 TGGCAATAAGGACAACGTCGTC 22  
::|||||||:|  
Sbjct: 1516 GTCGTTATTCCTGTTGCAGTAG 1495

>miR915 Score: 0.0 R03G\_12456  
Query: 1 TGGCAATAAGGACAACGTCGTC 22  
|||||||  
Sbjct: 679 ACCGTTATTCCTGTTGCAGCAG 658

>miR915 Score: 0.0 R03G\_09507  
Query: 1 TGGCAATAAGGACAACGTCGTC 22  
|||||||  
Sbjct: 751 ACCGTTATTCCTGTTGCAGCAG 730

>miR915 Score: 0.0 R03G\_08181  
Query: 1 TGGCAATAAGGACAACGTCGTC 22  
|||||||  
Sbjct: 454 ACCGTTATTCCTGTTGCAGCAG 433

>miR915 Score: 2.5 R03G\_04583  
Query: 1 TGGCAATAAGGACAACGTCGTC 22  
|||\*||\*||||||:||||  
Sbjct: 841 ACCGATACTCCTGTTGTAGCAG 820

>miR915 Score: 0.0 R03G\_03515  
Query: 1 TGGCAATAAGGACAACGTCGTC 22  
|||||||  
Sbjct: 391 ACCGTTATTCCTGTTGCAGCAG 370

>miR915 Score: 2.2 R03G\_00484  
Query: 1 TGGCAATAAGGACAACGTCGTC 22  
\*:\*||||||\*|||:|  
Sbjct: 66 TTCGTTATTCCTGTTACAGTAG 45

>miR915 Score: 2.5 R03G\_00570  
Query: 1 TGGCAATAAGGACAACGTCGTC 22  
|:|\*||\*|||||||  
Sbjct: 874 ATCGATACTCCTGTTGCAGCAG 853

>miR915 Score: 0.5 R03G\_01653

Query: 1 TGGCAATAAGGACAACGTCGTC 22  
|||||||:|||||  
Sbjct: 619 ACCGTTATTCCTGTTGTAGCAG 598  
>miR414 Score: 2.5 R03G\_15731  
Query: 1 TACCATCTTCTTCATATCGTCA 22  
\*||||||\*||||\*|||||  
Sbjct: 60 TTGGTAGAAAAAGTAGAGCAGT 39  
>miR414 Score: 2.5 R03G\_14147  
Query: 1 TACCATCTTCTTCATATCGTCA 22  
\*||||:|||||||:||\*||\*  
Sbjct: 310 TTGGTGGAAGAAGGTAG-AGA 290  
>miR414 Score: 2.5 R03G\_12689  
Query: 1 TACCATCTTCTTCATATCGTCA 22  
|||||||\*||\*||\*|  
Sbjct: 1465 ATGGTAGAAGAAGTAGAAGA-T 1445  
>miR414 Score: 0.0 R03G\_12063  
Query: 1 TACCATCTTCTTCATATCGTCA 22  
|||||||  
Sbjct: 1125 ATGGTAGAAGAAGTATAGCAGT 1104  
>miR414 Score: 0.2 R03G\_12187  
Query: 1 TACCATCTTCTTCATATCGTCA 22  
|||||||:|||  
Sbjct: 1629 ATGGTAGAAGAAGTATAGTAGT 1608  
>miR414 Score: 1.5 R03G\_11395  
Query: 1 TACCATCTTCTTCATATCGTCA 22  
||||||\*|||||||\*|||  
Sbjct: 129 ATGGTAGCAGAAGTATAGAAGT 108  
>miR414 Score: 0.0 R03G\_07712  
Query: 1 TACCATCTTCTTCATATCGTCA 22  
|||||||  
Sbjct: 129 ATGGTAGAAGAAGTATAGCAGT 108  
>miR414 Score: 2.5 R03G\_04919  
Query: 1 TACCATCTTCTTCATATCGTCA 22  
\*|||||||\*||\*||\*|  
Sbjct: 1452 CTGGTAGAAGAAGTAAAGC-CT 1432  
>miR414 Score: 0.0 R03G\_04206  
Query: 1 TACCATCTTCTTCATATCGTCA 22  
|||||||  
Sbjct: 678 ATGGTAGAAGAAGTATAGCAGT 657  
>miR169d Score: 0.0 R03G\_16143  
Query: 1 TTAGCAAGGATGAGATTACCGG 22  
|||||||  
Sbjct: 1820 AATCGTTCCTACTCTAATGGCC 1799  
>miR169d Score: 0.0 R03G\_15135  
Query: 1 TTAGCAAGGATGAGATTACCGG 22

```
|||||
Sbjct: 1823 AATCGTTCCTACTCTAATGGCC 1802
>miR169d Score: 0.0 R03G_12533
Query: 1 TTAGCAAGGATGAGATTACCGG 22
|||||
Sbjct: 1163 AATCGTTCCTACTCTAATGGCC 1142
>miR169d Score: 0.0 R03G_07028
Query: 1 TTAGCAAGGATGAGATTACCGG 22
|||||
Sbjct: 893 AATCGTTCCTACTCTAATGGCC 872
>miR169d Score: 0.0 R03G_06727
Query: 1 TTAGCAAGGATGAGATTACCGG 22
|||||
Sbjct: 1961 AATCGTTCCTACTCTAATGGCC 1940
>miR169d Score: 0.0 R03G_02691
Query: 1 TTAGCAAGGATGAGATTACCGG 22
|||||
Sbjct: 356 AATCGTTCCTACTCTAATGGCC 335
>miR169d Score: 0.0 R03G_04118
Query: 1 TTAGCAAGGATGAGATTACCGG 22
|||||
Sbjct: 1823 AATCGTTCCTACTCTAATGGCC 1802
>miR169d Score: 0.0 R03G_17384
Query: 1 TTAGCAAGGATGAGATTACCGG 22
|||||
Sbjct: 1823 AATCGTTCCTACTCTAATGGCC 1802
>miR169d Score: 0.0 R03G_17329
Query: 1 TTAGCAAGGATGAGATTACCGG 22
|||||
Sbjct: 1160 AATCGTTCCTACTCTAATGGCC 1139
>miR169d Score: 0.0 R03G_17318
Query: 1 TTAGCAAGGATGAGATTACCGG 22
|||||
Sbjct: 1823 AATCGTTCCTACTCTAATGGCC 1802
>miR169d Score: 0.0 R03G_17274
Query: 1 TTAGCAAGGATGAGATTACCGG 22
|||||
Sbjct: 1823 AATCGTTCCTACTCTAATGGCC 1802
>miR5499 Score: 2.5 R03G_13849
Query: 1 TACAGGAAGATCGTTTGGAA 20
|**|||||:|||||
Sbjct: 438 ACATCCTTCTAGTAAACCTT 419
>miR5499 Score: 2.0 R03G_12682
Query: 1 TACAGGAAGATCGTTTGGAA 20
|||||:***
```



Sbjct: 429 ATGTCCTTCTAGCAAATAAC 410  
>miR5499 Score: 2.5 R03G\_10420  
Query: 1 TACAGGAAGATCGTTTGGAA 20  
|\*\*|||||||:|||||||  
Sbjct: 438 ACATCCTTCTAGTAAACCTT 419  
>miR5499 Score: 2.5 R03G\_10965  
Query: 1 TACAGGAAGATCGTTTGGAA 20  
|\*\*|||||||:|||||||  
Sbjct: 438 ACATCCTTCTAGTAAACCTT 419  
>miR5499 Score: 0.0 R03G\_07991  
Query: 1 TACAGGAAGATCGTTTGGAA 20  
|||||||  
Sbjct: 447 ATGTCCTTCTAGCAAACCTT 428  
>miR5499 Score: 0.0 R03G\_07972  
Query: 1 TACAGGAAGATCGTTTGGAA 20  
|||||||  
Sbjct: 447 ATGTCCTTCTAGCAAACCTT 428  
>miR5499 Score: 2.5 R03G\_05865  
Query: 1 TACAGGAAGATCGTTTGGAA 20  
|\*\*|||||||:|||||||  
Sbjct: 438 ACATCCTTCTAGTAAACCTT 419  
>miR5499 Score: 2.2 R03G\_03352  
Query: 1 TACAGGAAGATCGTTTGGAA 20  
:|||:||||||\*|||\*|  
Sbjct: 361 GTGTTCTTCTAGGAAACCTT 342  
>miR5499 Score: 2.2 R03G\_03677  
Query: 1 TACAGGAAGATCGTTTGGAA 20  
:|||||||:|:||||\*|\*  
Sbjct: 381 GTGTCCTTCTGGTAAAC-TA 363  
>miR5499 Score: 2.5 R03G\_01733  
Query: 1 TACAGGAAGATCGTTTGGAA 20  
|\*\*|||||||:|||||||  
Sbjct: 438 ACATCCTTCTAGTAAACCTT 419  
>miR5499 Score: 2.5 R03G\_01944  
Query: 1 TACAGGAAGATCGTTTGGAA 20  
|\*\*|||||||:|||||||  
Sbjct: 438 ACATCCTTCTAGTAAACCTT 419  
>miR5499 Score: 2.5 R03G\_17446  
Query: 1 TACAGGAAGATCGTTTGGAA 20  
|\*\*|||||||:|||||||  
Sbjct: 438 ACATCCTTCTAGTAAACCTT 419  
>miR5499 Score: 2.5 R03G\_17287  
Query: 1 TACAGGAAGATCGTTTGGAA 20  
|\*\*|||||||:|||||||  
Sbjct: 438 ACATCCTTCTAGTAAACCTT 419



Query: 1 TGAAAGTGGCTCATCAAGGGGT 22  
|||||||\*|||||||  
Sbjct: 222 ACTTTCACCAAGTAGTTCCCCA 201  
>miR161.1 Score: 1.0 R03G\_04693  
Query: 1 TGAAAGTGGCTCATCAAGGGGT 22  
|||||||\*|||||||  
Sbjct: 399 ACTTTCACCAAGTAGTTCCCCA 378  
>miR161.1 Score: 1.0 R03G\_05349  
Query: 1 TGAAAGTGGCTCATCAAGGGGT 22  
|||||||\*|||||||  
Sbjct: 399 ACTTTCACCAAGTAGTTCCCCA 378  
>miR161.1 Score: 0.0 R03G\_02823  
Query: 1 TGAAAGTGGCTCATCAAGGGGT 22  
|||||||\*|||||||  
Sbjct: 399 ACTTTCACCGAGTAGTTCCCCA 378  
>miR161.1 Score: 1.0 R03G\_03610  
Query: 1 TGAAAGTGGCTCATCAAGGGGT 22  
|||||||\*|||||||  
Sbjct: 377 ACTTTCACCAAGTAGTTCCCCA 356  
>miR161.1 Score: 1.0 R03G\_03622  
Query: 1 TGAAAGTGGCTCATCAAGGGGT 22  
|||||||\*|||||||  
Sbjct: 222 ACTTTCACCAAGTAGTTCCCCA 201  
>miR161.1 Score: 1.2 R03G\_04209  
Query: 1 TGAAAGTGGCTCATCAAGGGGT 22  
|||||||\*|||||||:  
Sbjct: 327 ACTTTCACCAAGTAGTTCCCCG 306  
>miR3631a-3p Score: 2.5 R03G\_16658  
Query: 1 TAATTGGATTATGTCTTAACAA 22  
|||||||\*|||||||\*||\*  
Sbjct: 197 ATTAACCTATTACAGAACTAAT 176  
>miR3631a-3p Score: 1.0 R03G\_15743  
Query: 1 TAATTGGATTATGTCTTAACAA 22  
|||||||\*|||||||\*  
Sbjct: 289 ATTAACCTAATACAGAATTATC 268  
>miR3631a-3p Score: 0.0 R03G\_14785  
Query: 1 TAATTGGATTATGTCTTAACAA 22  
|||||||\*|||||||  
Sbjct: 289 ATTAACCTAATACAGAATTGTT 268  
>miR3631a-3p Score: 0.0 R03G\_13292  
Query: 1 TAATTGGATTATGTCTTAACAA 22  
|||||||\*|||||||  
Sbjct: 289 ATTAACCTAATACAGAATTGTT 268  
>miR3631a-3p Score: 0.0 R03G\_06411  
Query: 1 TAATTGGATTATGTCTTAACAA 22

```
|||||
Sbjct: 289 ATTAACCTAATACAGAATTGTT 268
>miR3631a-3p Score: 0.0 R03G_03783
Query: 1 TAATTGGATTATGTCTTAACAA 22
|||||
Sbjct: 289 ATTAACCTAATACAGAATTGTT 268
>miR3631a-3p Score: 0.0 R03G_17372
Query: 1 TAATTGGATTATGTCTTAACAA 22
|||||
Sbjct: 289 ATTAACCTAATACAGAATTGTT 268
>miR3631a-3p Score: 0.0 R03G_17309
Query: 1 TAATTGGATTATGTCTTAACAA 22
|||||
Sbjct: 289 ATTAACCTAATACAGAATTGTT 268
>miR3631a-3p Score: 0.0 R03G_17311
Query: 1 TAATTGGATTATGTCTTAACAA 22
|||||
Sbjct: 289 ATTAACCTAATACAGAATTGTT 268
>miR164b-3p Score: 2.5 R03G_14969
Query: 1 GCGCCCAGCTTCTCCACC 18
*||||*||||*|||
Sbjct: 623 GCGGGTGAAGAAGTGG 606
>miR164b-3p Score: 2.0 R03G_10474
Query: 1 GCGCCCAGCTTCTCCACC 18
*||*|||||||*
Sbjct: 27 AGCTGGTCGAAGAGGTGA 10
>miR164b-3p Score: 2.5 R03G_01126
Query: 1 GCGCCCAGCTTCTCCACC 18
*||||*||||*|||
Sbjct: 623 GCGGGTGAAGAAGTGG 606
>miR5818 Score: 2.5 R03G_16292
Query: 1 TCCAACAGAAGGGCCACTT 19
||||*|:||||*|||||
Sbjct: 435 AGGTTATTTTCCAGGTGAA 417
>miR5818 Score: 2.2 R03G_12760
Query: 1 TCCAACAGAAGGGCCACTT 19
**|||||||:|||||||:
Sbjct: 102 TAGTTGTCTTCCGGTGAG 84
>miR5818 Score: 2.5 R03G_10403
Query: 1 TCCAACAGAAGGGCCACTT 19
|*||||*||:|||||
Sbjct: 1911 AAGTTGTCATCCTGGTGAA 1893
>miR5818 Score: 2.2 R03G_08166
Query: 1 TCCAACAGAAGGGCCACT-T 19
||||*||||:||||*|
```

Sbjct: 654 AGGTTATCTTCTCGGTGGTA 635  
>miR5818 Score: 2.5 R03G\_01784  
Query: 1 TCCAACAGAAGGGCCACTT 19  
||\*||:|||||||  
Sbjct: 125 AGTTCGTTTTCCCGGTGAA 107  
>miR1211-3p Score: 2.0 R03G\_15811  
Query: 1 TCACACCGTCTCTTCATGC 19  
|||\*|||  
Sbjct: 395 AGTATAGCAGAGAAGTACG 377  
>miR1211-3p Score: 1.5 R03G\_14467  
Query: 1 TCACACCGTCTCTTCATGC 19  
||||\*||:|||||||  
Sbjct: 569 AGTGTAGCGGAGAAGTACG 551  
>miR1211-3p Score: 0.2 R03G\_14722  
Query: 1 TCACACCGTCTCTTCATGC 19  
|||||||:|  
Sbjct: 1040 AGTGTGGCAGAGAAGTATG 1022  
>miR1211-3p Score: 0.2 R03G\_13903  
Query: 1 TCACACCGTCTCTTCATGC 19  
|||||||:|  
Sbjct: 1040 AGTGTGGCAGAGAAGTATG 1022  
>miR1211-3p Score: 2.5 R03G\_13957  
Query: 1 TCACACCGTCTCTTCATGC 19  
\*||||||\*||:||||\*|  
Sbjct: 330 TGTGTGGCACAGGAGTA-G 313  
>miR1211-3p Score: 2.5 R03G\_13558  
Query: 1 TCACACCGTCTCTTCATGC 19  
|\*||||||\*||\*  
Sbjct: 462 ACTGTGGCAGAGAAGAACA 444  
>miR1211-3p Score: 0.2 R03G\_13664  
Query: 1 TCACACCGTCTCTTCATGC 19  
|||||||:|  
Sbjct: 1040 AGTGTGGCAGAGAAGTATG 1022  
>miR1211-3p Score: 0.2 R03G\_13672  
Query: 1 TCACACCGTCTCTTCATGC 19  
|||||||:|  
Sbjct: 1040 AGTGTGGCAGAGAAGTATG 1022  
>miR1211-3p Score: 0.2 R03G\_12139  
Query: 1 TCACACCGTCTCTTCATGC 19  
|||||||:|  
Sbjct: 413 AGTGTGGCAGAGAAGTATG 395  
>miR1211-3p Score: 0.2 R03G\_11486  
Query: 1 TCACACCGTCTCTTCATGC 19  
|||||||:|  
Sbjct: 749 AGTGTGGCAGAGAAGTATG 731

>miR1211-3p Score: 0.2 R03G\_11567  
Query: 1 TCACACCGTCTCTTCATGC 19  
|||||||:|  
Sbjct: 1697 AGTGTGGCAGAGAAGTATG 1679

>miR1211-3p Score: 1.0 R03G\_11757  
Query: 1 TCACACCGTCTCTTCATGC 19  
||||\*|||||||  
Sbjct: 425 AGTGTAGCAGAGAAGTACG 407

>miR1211-3p Score: 1.0 R03G\_11765  
Query: 1 TCACACCGTCTCTTCATGC 19  
||||\*|||||||  
Sbjct: 425 AGTGTAGCAGAGAAGTACG 407

>miR1211-3p Score: 2.5 R03G\_11827  
Query: 1 TCACACCGTCTCTTCATGC 19  
||||\*||:\*|||||||  
Sbjct: 227 AGTGTAGCGAAGAAGTACG 209

>miR1211-3p Score: 0.2 R03G\_10644  
Query: 1 TCACACCGTCTCTTCATGC 19  
|||||||:|  
Sbjct: 425 AGTGTGGCAGAGAAGTATG 407

>miR1211-3p Score: 2.5 R03G\_09279  
Query: 1 TCACACCGTCTCTTCATGC 19  
|||\*||\*||:|||||||  
Sbjct: 575 AGTATAGCGGAGAAGTACG 557

>miR1211-3p Score: 0.2 R03G\_09419  
Query: 1 TCACACCGTCTCTTCATGC 19  
|||||||:|  
Sbjct: 860 AGTGTGGCAGAGAAGTATG 842

>miR1211-3p Score: 1.5 R03G\_08684  
Query: 1 TCACACCGTCTCTTCATGC 19  
||||\*||:|||||||  
Sbjct: 458 AGTGTAGCGGAGAAGTACG 440

>miR1211-3p Score: 0.2 R03G\_08906  
Query: 1 TCACACCGTCTCTTCATGC 19  
|||||||:|  
Sbjct: 1040 AGTGTGGCAGAGAAGTATG 1022

>miR1211-3p Score: 1.2 R03G\_05535  
Query: 1 TCACACCGTCTCTTCATGC 19  
||||\*|||||||:|  
Sbjct: 425 AGTGCGGCAGAGAAGTATG 407

>miR1211-3p Score: 0.2 R03G\_05603  
Query: 1 TCACACCGTCTCTTCATGC 19  
|||||||:|  
Sbjct: 299 AGTGTGGCAGAGAAGTATG 281

>miR1211-3p Score: 0.2 R03G\_05616

Query: 1 TCACACCGTCTCTTCATGC 19  
|||||||:|  
Sbjct: 329 AGTGTGGCAGAGAAGTATG 311  
>miR1211-3p Score: 0.2 R03G\_05181  
Query: 1 TCACACCGTCTCTTCATGC 19  
|||||||:|  
Sbjct: 1040 AGTGTGGCAGAGAAGTATG 1022  
>miR1211-3p Score: 0.2 R03G\_05194  
Query: 1 TCACACCGTCTCTTCATGC 19  
|||||||:|  
Sbjct: 1040 AGTGTGGCAGAGAAGTATG 1022  
>miR1211-3p Score: 0.2 R03G\_05303  
Query: 1 TCACACCGTCTCTTCATGC 19  
|||||||:|  
Sbjct: 1040 AGTGTGGCAGAGAAGTATG 1022  
>miR1211-3p Score: 0.2 R03G\_02354  
Query: 1 TCACACCGTCTCTTCATGC 19  
|||||||:|  
Sbjct: 1040 AGTGTGGCAGAGAAGTATG 1022  
>miR1211-3p Score: 2.5 R03G\_02446  
Query: 1 TCACACCGTCTCTTCATGC 19  
\*||\*|||||:||||\*|  
Sbjct: 225 TGTATGGCAGGGAAGTA-G 208  
>miR1211-3p Score: 2.5 R03G\_03733  
Query: 1 TCACACCGTCTCTTCATGC 19  
|||||||\*||||\*|\*|  
Sbjct: 727 AGTGTGGCATAGAAGAAGG 709  
>miR1211-3p Score: 1.2 R03G\_04104  
Query: 1 TCACACCGTCTCTTCATGC 19  
|||\*|||||||:|  
Sbjct: 737 AGTATGGCAGAGAAGTATG 719  
>miR1211-3p Score: 0.0 R03G\_01518  
Query: 1 TCACACCGTCTCTTCATGC 19  
|||||||:|  
Sbjct: 413 AGTGTGGCAGAGAAGTACG 395  
>miR1211-3p Score: 0.0 R03G\_01528  
Query: 1 TCACACCGTCTCTTCATGC 19  
|||||||:|  
Sbjct: 608 AGTGTGGCAGAGAAGTACG 590  
>miR1211-3p Score: 0.8 R03G\_01923  
Query: 1 TCACACCGTCTCTTCATGC 19  
|||||||:|||||||:|  
Sbjct: 989 AGTGTGGTAGAGAAGTATG 971  
>miR5246 Score: 0.0 R03G\_16540  
Query: 1 TTGAGACAGCTTTGACTT 18

```
|||||
Sbjct: 330 AACTCTGTCGAAACTGAA 313
>miR5246 Score: 1.0 R03G_16144
Query: 1 TTGAGACAGCTTTGACTT 18
|||||*|||||
Sbjct: 867 AACTCTGTCAAAACTGAA 850
>miR5246 Score: 2.0 R03G_16293
Query: 1 TTGAGACAGCTTTGACTT 18
||*|||||*||
Sbjct: 1188 AAGTCTGTCGAAACTTAA 1171
>miR5246 Score: 2.0 R03G_16067
Query: 1 TTGAGACAGCTTTGACTT 18
*|||||*|||||*
Sbjct: 1144 TACTCTGTCGTAAGTAT 1127
>miR5246 Score: 0.0 R03G_16120
Query: 1 TTGAGACAGCTTTGACTT 18
|||||
Sbjct: 330 AACTCTGTCGAAACTGAA 313
>miR5246 Score: 2.5 R03G_14810
Query: 1 TTGAGACAGCTTTGACTT 18
||*|||||*|||||
Sbjct: 2541 AAATCTGTAAAAGTAT 2524
>miR5246 Score: 0.0 R03G_14972
Query: 1 TTGAGACAGCTTTGACTT 18
|||||
Sbjct: 798 AACTCTGTCGAAACTGAA 781
>miR5246 Score: 2.0 R03G_15244
Query: 1 TTGAGACAGCTTTGACTT 18
||*|||||*|||||
Sbjct: 622 AATTATGTCGGAAGTAT 605
>miR5246 Score: 0.0 R03G_13295
Query: 1 TTGAGACAGCTTTGACTT 18
|||||
Sbjct: 603 AACTCTGTCGAAACTGAA 586
>miR5246 Score: 0.0 R03G_13702
Query: 1 TTGAGACAGCTTTGACTT 18
|||||
Sbjct: 798 AACTCTGTCGAAACTGAA 781
>miR5246 Score: 0.0 R03G_13754
Query: 1 TTGAGACAGCTTTGACTT 18
|||||
Sbjct: 867 AACTCTGTCGAAACTGAA 850
>miR5246 Score: 0.0 R03G_12672
Query: 1 TTGAGACAGCTTTGACTT 18
|||||
```



Sbjct: 672 AACTCTGTCGAAACTGAA 655  
>miR5246 Score: 0.0 R03G\_13000  
Query: 1 TTGAGACAGCTTTGACTT 18  
|||||

Sbjct: 798 AACTCTGTCGAAACTGAA 781  
>miR5246 Score: 0.0 R03G\_13139  
Query: 1 TTGAGACAGCTTTGACTT 18  
|||||

Sbjct: 243 AACTCTGTCGAAACTGAA 226  
>miR5246 Score: 0.0 R03G\_12062  
Query: 1 TTGAGACAGCTTTGACTT 18  
|||||

Sbjct: 330 AACTCTGTCGAAACTGAA 313  
>miR5246 Score: 0.0 R03G\_12173  
Query: 1 TTGAGACAGCTTTGACTT 18  
|||||

Sbjct: 663 AACTCTGTCGAAACTGAA 646  
>miR5246 Score: 0.0 R03G\_12189  
Query: 1 TTGAGACAGCTTTGACTT 18  
|||||

Sbjct: 330 AACTCTGTCGAAACTGAA 313  
>miR5246 Score: 2.5 R03G\_11276  
Query: 1 TTGAGACAGCTTTGACTT 18  
|||||\*|:|::|

Sbjct: 235 AACTCTCTTGAAGTTGAA 218  
>miR5246 Score: 2.5 R03G\_09214  
Query: 1 TTGAGACAGCTTTGACTT 18  
\*|||\*||:|:|

Sbjct: 25 CACTATGTTGAAATTGAA 8  
>miR5246 Score: 0.0 R03G\_09485  
Query: 1 TTGAGACAGCTTTGACTT 18  
|||||

Sbjct: 243 AACTCTGTCGAAACTGAA 226  
>miR5246 Score: 0.0 R03G\_09487  
Query: 1 TTGAGACAGCTTTGACTT 18  
|||||

Sbjct: 243 AACTCTGTCGAAACTGAA 226  
>miR5246 Score: 0.0 R03G\_09598  
Query: 1 TTGAGACAGCTTTGACTT 18  
|||||

Sbjct: 798 AACTCTGTCGAAACTGAA 781  
>miR5246 Score: 2.2 R03G\_09763  
Query: 1 TTGAGACAGCTTTGACTT 18  
|||:|||||:|\*|:

Sbjct: 645 AACTTTGTCGAAATTAAG 628

>miR5246 Score: 0.0 R03G\_09942  
Query: 1 TTGAGACAGCTTTGACTT 18  
|||||  
Sbjct: 243 AACTCTGTCGAAACTGAA 226

>miR5246 Score: 0.0 R03G\_10036  
Query: 1 TTGAGACAGCTTTGACTT 18  
|||||  
Sbjct: 243 AACTCTGTCGAAACTGAA 226

>miR5246 Score: 1.2 R03G\_08455  
Query: 1 TTGAGACAGCTTTGACTT 18  
|||||\*|:  
Sbjct: 779 AACTCTGTCGAAACTTAG 762

>miR5246 Score: 0.0 R03G\_06740  
Query: 1 TTGAGACAGCTTTGACTT 18  
|||||  
Sbjct: 798 AACTCTGTCGAAACTGAA 781

>miR5246 Score: 0.0 R03G\_07029  
Query: 1 TTGAGACAGCTTTGACTT 18  
|||||  
Sbjct: 243 AACTCTGTCGAAACTGAA 226

>miR5246 Score: 0.0 R03G\_07673  
Query: 1 TTGAGACAGCTTTGACTT 18  
|||||  
Sbjct: 867 AACTCTGTCGAAACTGAA 850

>miR5246 Score: 0.0 R03G\_05933  
Query: 1 TTGAGACAGCTTTGACTT 18  
|||||  
Sbjct: 243 AACTCTGTCGAAACTGAA 226

>miR5246 Score: 0.0 R03G\_05934  
Query: 1 TTGAGACAGCTTTGACTT 18  
|||||  
Sbjct: 798 AACTCTGTCGAAACTGAA 781

>miR5246 Score: 0.0 R03G\_06719  
Query: 1 TTGAGACAGCTTTGACTT 18  
|||||  
Sbjct: 798 AACTCTGTCGAAACTGAA 781

>miR5246 Score: 2.0 R03G\_04477  
Query: 1 TTGAGACAGCTTTGACTT 18  
|||||\*\*|||  
Sbjct: 3261 AACTCTGTCGACTCTGAA 3244

>miR5246 Score: 0.0 R03G\_04671  
Query: 1 TTGAGACAGCTTTGACTT 18  
|||||  
Sbjct: 744 AACTCTGTCGAAACTGAA 727

>miR5246 Score: 0.0 R03G\_04694

Query: 1 TTGAGACAGCTTTGACTT 18  
|||||  
Sbjct: 330 AACTCTGTCGAAACTGAA 313  
>miR5246 Score: 0.0 R03G\_03608  
Query: 1 TTGAGACAGCTTTGACTT 18  
|||||  
Sbjct: 330 AACTCTGTCGAAACTGAA 313  
>miR5246 Score: 0.0 R03G\_03989  
Query: 1 TTGAGACAGCTTTGACTT 18  
|||||  
Sbjct: 603 AACTCTGTCGAAACTGAA 586  
>miR5246 Score: 2.5 R03G\_04159  
Query: 1 TTGAGACAGCTTTGACTT 18  
|||\*|||:\*|||||  
Sbjct: 223 AACTATGTTTAAACTGAA 206  
>miR5246 Score: 0.0 R03G\_00252  
Query: 1 TTGAGACAGCTTTGACTT 18  
|||||  
Sbjct: 921 AACTCTGTCGAAACTGAA 904  
>miR5246 Score: 0.0 R03G\_01310  
Query: 1 TTGAGACAGCTTTGACTT 18  
|||||  
Sbjct: 603 AACTCTGTCGAAACTGAA 586  
>miR5246 Score: 0.0 R03G\_01710  
Query: 1 TTGAGACAGCTTTGACTT 18  
|||||  
Sbjct: 255 AACTCTGTCGAAACTGAA 238  
>miR5246 Score: 0.0 R03G\_01738  
Query: 1 TTGAGACAGCTTTGACTT 18  
|||||  
Sbjct: 798 AACTCTGTCGAAACTGAA 781  
>miR5246 Score: 0.0 R03G\_01938  
Query: 1 TTGAGACAGCTTTGACTT 18  
|||||  
Sbjct: 867 AACTCTGTCGAAACTGAA 850  
>miR5246 Score: 0.0 R03G\_17463  
Query: 1 TTGAGACAGCTTTGACTT 18  
|||||  
Sbjct: 243 AACTCTGTCGAAACTGAA 226  
>miR5246 Score: 0.0 R03G\_17461  
Query: 1 TTGAGACAGCTTTGACTT 18  
|||||  
Sbjct: 330 AACTCTGTCGAAACTGAA 313  
>miR7709-3p Score: 2.5 R03G\_05793  
Query: 1 TGACCTAGTCATATTTGAT 19

\*||||:|:|||||\*||  
Sbjct: 1363 TCTGGGTCGGTATAAA-TA 1346  
>miR1098 Score: 2.5 R03G\_04797  
Query: 1 TATGCGTTTTTGTCTGAAAT 20  
\*||:|\*||||:|||||||  
Sbjct: 998 TTATGAAAAAGCAGACTTTA 979  
>miR1098 Score: 2.5 R03G\_04907  
Query: 1 TATGCGTTTTTGTCTGAAAT 20  
\*||||:||||:|:|\*  
Sbjct: 45 CTACGCGAAAACGGATTTTT 26  
>miR1098 Score: 2.5 R03G\_00337  
Query: 1 TATGCGTTTTTGTCTGAAAT 20  
\*||||:||||:|||||\*|  
Sbjct: 593 CTACGTAAAAGTAGACTTCA 574  
>miR1098 Score: 2.5 R03G\_01119  
Query: 1 TATGCGTTTTTGTCTGAAAT 20  
\*|||||||:|\*|||  
Sbjct: 908 TTACGCAAAAATAGATATTA 889  
>miR867 Score: 2.5 R03G\_10282  
Query: 1 TTGAACAGGATTATTAGAGAG 21  
||\*|||||||\*||\*||  
Sbjct: 279 AAGTTGTCCTAATAAACT-TC 260  
>miR867 Score: 2.5 R03G\_10164  
Query: 1 TTGAACAGGATTATTAGAGAG 21  
||||||:||||:|\*||  
Sbjct: 276 AACTTGTTTTAATAGTTT-TC 257  
>miR867 Score: 2.5 R03G\_07276  
Query: 1 TTGAACAGGATTATTAGAGAG 21  
||||||:||||:|\*||  
Sbjct: 576 AACTTGTTTTAATAGTTT-TC 557  
>miR867 Score: 2.5 R03G\_06105  
Query: 1 TTGAACAGGATTATTAGAGAG 21  
\*|||||||\*|||  
Sbjct: 582 TACTTGTCCTAATAAA-TCTC 563  
>miR8773 Score: 0.0 R03G\_16542  
Query: 1 TTGGATGCAATCGGTGGTTTAT 22  
|||||||  
Sbjct: 494 AACCTACGTTAGCCACCAAATA 473  
>miR9738 Score: 2.5 R03G\_08953  
Query: 1 TGAAACATATTGGGCTCGTC 20  
||\*|\*|||||||\*||  
Sbjct: 212 ACTATTTATAACCCGAGAAG 193  
>miR9738 Score: 2.5 R03G\_03642  
Query: 1 TGAAACATATTGGGCTCGTC 20  
||||||:\*:||||||\*||

Sbjct: 1938 ACTTTGTGAGACCCGAG-AG 1920  
>miR840-3p Score: 0.5 R03G\_12953  
Query: 1 TGGTTTATGTCCTTAGTTTC 20  
|||||:|||||

Sbjct: 821 ACCAAGTACAGGAATCAAAG 802  
>miR840-3p Score: 2.5 R03G\_09472  
Query: 1 TGGTTTATGTCCTTAGTTTC 20  
|\*|||\*|||:|||||

Sbjct: 257 AACAAAAACAGGAGTCAAAG 238  
>miR840-3p Score: 2.5 R03G\_04834  
Query: 1 TGGTTTATGTCCTTAGTTTC 20  
|||||\*||:|||||:|\*|

Sbjct: 283 ACCAATTATAGGAATCGAAA 264  
>miR840-3p Score: 0.0 R03G\_01367  
Query: 1 TGGTTTATGTCCTTAGTTTC 20  
|||||

Sbjct: 935 ACCAAATACAGGAATCAAAG 916  
>miR840-3p Score: 0.0 R03G\_16979  
Query: 1 TGGTTTATGTCCTTAGTTTC 20  
|||||

Sbjct: 815 ACCAAATACAGGAATCAAAG 796  
>miR5015 Score: 0.0 R03G\_16818  
Query: 1 TTGGTGATGTAGTAGTCTAC 20  
|||||

Sbjct: 1403 AACCACTACATCATCAGATG 1384  
>miR5015 Score: 0.0 R03G\_16797  
Query: 1 TTGGTGATGTAGTAGTCTAC 20  
|||||

Sbjct: 662 AACCACTACATCATCAGATG 643  
>miR5015 Score: 0.0 R03G\_16800  
Query: 1 TTGGTGATGTAGTAGTCTAC 20  
|||||

Sbjct: 1661 AACCACTACATCATCAGATG 1642  
>miR5015 Score: 2.0 R03G\_16183  
Query: 1 TTGGTGATGTAGTAGTCTAC 20  
|\*|||\*|||\*|\*|

Sbjct: 19 ACCCACTACATCATCAG-TA 1  
>miR5015 Score: 2.5 R03G\_16310  
Query: 1 TTGGTGATGTAGTAGTCT-AC 20  
|||:||||\*|||\*||

Sbjct: 514 AACTACTACTTCATCAGTCTG 494  
>miR5015 Score: 2.0 R03G\_15674  
Query: 1 TTGGTGATGTAGTAGTCTAC 20  
|||||:|\*|||\*||

Sbjct: 713 AACCACTATTTTCATCAGCTG 694

>miR5015 Score: 0.0 R03G\_15265  
Query: 1 TTGGTGATGTAGTAGTCTAC 20  
|||||  
Sbjct: 1661 AACCACTACATCATCAGATG 1642

>miR5015 Score: 0.0 R03G\_15266  
Query: 1 TTGGTGATGTAGTAGTCTAC 20  
|||||  
Sbjct: 1661 AACCACTACATCATCAGATG 1642

>miR5015 Score: 0.0 R03G\_15268  
Query: 1 TTGGTGATGTAGTAGTCTAC 20  
|||||  
Sbjct: 1661 AACCACTACATCATCAGATG 1642

>miR5015 Score: 0.0 R03G\_14352  
Query: 1 TTGGTGATGTAGTAGTCTAC 20  
|||||  
Sbjct: 1661 AACCACTACATCATCAGATG 1642

>miR5015 Score: 2.0 R03G\_14624  
Query: 1 TTGGTGATGTAGTAGTCTAC 20  
|||||:\*|||||\*||  
Sbjct: 1550 AACCACTATTTTCATCAGCTG 1531

>miR5015 Score: 2.0 R03G\_13865  
Query: 1 TTGGTGATGTAGTAGTCTAC 20  
|||||:\*|||||\*||  
Sbjct: 1634 AACCACTATTTTCATCAGCTG 1615

>miR5015 Score: 0.0 R03G\_13217  
Query: 1 TTGGTGATGTAGTAGTCTAC 20  
|||||  
Sbjct: 1661 AACCACTACATCATCAGATG 1642

>miR5015 Score: 0.0 R03G\_13219  
Query: 1 TTGGTGATGTAGTAGTCTAC 20  
|||||  
Sbjct: 1661 AACCACTACATCATCAGATG 1642

>miR5015 Score: 0.0 R03G\_13222  
Query: 1 TTGGTGATGTAGTAGTCTAC 20  
|||||  
Sbjct: 1655 AACCACTACATCATCAGATG 1636

>miR5015 Score: 0.0 R03G\_13225  
Query: 1 TTGGTGATGTAGTAGTCTAC 20  
|||||  
Sbjct: 1673 AACCACTACATCATCAGATG 1654

>miR5015 Score: 0.0 R03G\_11967  
Query: 1 TTGGTGATGTAGTAGTCTAC 20  
|||||  
Sbjct: 1673 AACCACTACATCATCAGATG 1654

>miR5015 Score: 2.0 R03G\_11278

Query: 1 TTGGTGATGTAGTAGTCTAC 20  
|||||||:~\*|||||||\*||  
Sbjct: 1565 AACCACTATTTTCATCAGCTG 1546  
>miR5015 Score: 2.0 R03G\_10777  
Query: 1 TTGGTGATGTAGTAGTCTAC 20  
|||||||:~\*|||||||\*||  
Sbjct: 1538 AACCACTATTTTCATCAGCTG 1519  
>miR5015 Score: 2.2 R03G\_10870  
Query: 1 TTGGTGATGTAGTAGTCTAC 20  
|||||||:||||:~\*|||:||  
Sbjct: 392 AACCACTATATCGACAGGTG 373  
>miR5015 Score: 2.0 R03G\_08609  
Query: 1 TTGGTGATGTAGTAGTCTAC 20  
|||||||:~\*|||||||\*||  
Sbjct: 347 AACCACTATTTTCATCAGCTG 328  
>miR5015 Score: 2.0 R03G\_07869  
Query: 1 TTGGTGATGTAGTAGTCTAC 20  
|||||||:~\*|||||||\*||  
Sbjct: 1607 AACCACTATTTTCATCAGCTG 1588  
>miR5015 Score: 0.0 R03G\_05640  
Query: 1 TTGGTGATGTAGTAGTCTAC 20  
|||||||~\*|||||||~\*||  
Sbjct: 1409 AACCACTACATCATCAGATG 1390  
>miR5015 Score: 0.0 R03G\_05952  
Query: 1 TTGGTGATGTAGTAGTCTAC 20  
|||||||~\*|||||||~\*||  
Sbjct: 1541 AACCACTACATCATCAGATG 1522  
>miR5015 Score: 0.0 R03G\_03992  
Query: 1 TTGGTGATGTAGTAGTCTAC 20  
|||||||~\*|||||||~\*||  
Sbjct: 392 AACCACTACATCATCAGATG 373  
>miR5015 Score: 0.0 R03G\_04121  
Query: 1 TTGGTGATGTAGTAGTCTAC 20  
|||||||~\*|||||||~\*||  
Sbjct: 1661 AACCACTACATCATCAGATG 1642  
>miR5015 Score: 2.0 R03G\_01720  
Query: 1 TTGGTGATGTAGTAGTCTAC 20  
|||||||:~\*|||||||\*||  
Sbjct: 347 AACCACTATTTTCATCAGCTG 328  
>miR4227 Score: 2.2 R03G\_17182  
Query: 1 TCTGGTACCAATCTTTCA 18  
:|||||||~\*|||\*~\*  
Sbjct: 610 GGACCATGGTTAGGAACA 593  
>miR4227 Score: 1.8 R03G\_16810  
Query: 1 TCTGGTACCAATCTTTCA 18

```
:*|||||*  
Sbjct: 322 GAACCATGGTTAGAAAGC 305  
>miR4227 Score: 2.0 R03G_15739  
Query: 1 TCTGGTACCAATCTTTCA 18  
|||:|*|||||*  
Sbjct: 309 AGACTATAGTTAGAAAGC 292  
>miR4227 Score: 0.0 R03G_15157  
Query: 1 TCTGGTACCAATCTTTCA 18  
|||||  
Sbjct: 679 AGACCATGGTTAGAAAGT 662  
>miR4227 Score: 0.0 R03G_14636  
Query: 1 TCTGGTACCAATCTTTCA 18  
|||||  
Sbjct: 55 AGACCATGGTTAGAAAGT 38  
>miR4227 Score: 2.5 R03G_14648  
Query: 1 TCTGGTACCAATCTTTCA 18  
|||:|*|||||*  
Sbjct: 1262 AGATTAAGGTTAGAAAGA 1245  
>miR4227 Score: 2.5 R03G_13870  
Query: 1 TCTGGTACCAATCTTTCA 18  
|||||*|||*|||||*  
Sbjct: 237 AGACCACGGTAAGAAAGG 220  
>miR4227 Score: 0.0 R03G_13717  
Query: 1 TCTGGTACCAATCTTTCA 18  
|||||  
Sbjct: 55 AGACCATGGTTAGAAAGT 38  
>miR4227 Score: 1.2 R03G_12687  
Query: 1 TCTGGTACCAATCTTTCA 18  
:*|||||  
Sbjct: 55 GAACCATGGTTAGAAAGT 38  
>miR4227 Score: 2.2 R03G_12960  
Query: 1 TCTGGTACCAATCTTTCA 18  
:*|||||*|  
Sbjct: 340 GAACCATGGTTAGAAAAT 323  
>miR4227 Score: 2.2 R03G_12974  
Query: 1 TCTGGTACCAATCTTTCA 18  
:*|||||*|  
Sbjct: 340 GAACCATGGTTAGAAAAT 323  
>miR4227 Score: 0.0 R03G_12005  
Query: 1 TCTGGTACCAATCTTTCA 18  
|||||  
Sbjct: 679 AGACCATGGTTAGAAAGT 662  
>miR4227 Score: 0.0 R03G_12080  
Query: 1 TCTGGTACCAATCTTTCA 18  
|||||
```



Sbjct: 262 AGACCATGGTTAGAAAAGT 245  
>miR4227 Score: 2.2 R03G\_11343  
Query: 1 TCTGGTACCAATCTTTCA 18  
:|||||\*||||\*|||||||  
Sbjct: 1051 GGACCACGGTAAGAAAAGT 1034  
>miR4227 Score: 0.0 R03G\_11407  
Query: 1 TCTGGTACCAATCTTTCA 18  
|||||||  
Sbjct: 262 AGACCATGGTTAGAAAAGT 245  
>miR4227 Score: 2.2 R03G\_11953  
Query: 1 TCTGGTACCAATCTTTCA 18  
:\*|||||||\*|  
Sbjct: 556 GAACCATGGTTAGAAAAT 539  
>miR4227 Score: 2.2 R03G\_10525  
Query: 1 TCTGGTACCAATCTTTCA 18  
:\*|||||||\*|  
Sbjct: 679 GAACCATGGTTAGAAAAT 662  
>miR4227 Score: 2.2 R03G\_10531  
Query: 1 TCTGGTACCAATCTTTCA 18  
:\*|||||||\*|  
Sbjct: 679 GAACCATGGTTAGAAAAT 662  
>miR4227 Score: 2.5 R03G\_08073  
Query: 1 TCTGGTACCAATCTTTCA 18  
\*||:||||||\*||||\*  
Sbjct: 1253 CGATCATGGTTCGAAAGA 1236  
>miR4227 Score: 2.0 R03G\_06830  
Query: 1 TCTGGTACCAATCTTTCA 18  
|||||||\*||||||\*|  
Sbjct: 637 AGACCATGTTTAGAAATT 620  
>miR4227 Score: 2.2 R03G\_07110  
Query: 1 TCTGGTACCAATCTTTCA 18  
:\*|||||||\*|  
Sbjct: 679 GAACCATGGTTAGAAAAT 662  
>miR4227 Score: 2.2 R03G\_07676  
Query: 1 TCTGGTACCAATCTTTCA 18  
:\*|||||||\*|  
Sbjct: 679 GAACCATGGTTAGAAAAT 662  
>miR4227 Score: 2.2 R03G\_07678  
Query: 1 TCTGGTACCAATCTTTCA 18  
:\*|||||||\*|  
Sbjct: 679 GAACCATGGTTAGAAAAT 662  
>miR4227 Score: 2.2 R03G\_07866  
Query: 1 TCTGGTACCAATCTTTCA 18  
:\*|||||||\*|  
Sbjct: 55 GAACCATGGTTAGAAAAT 38

>miR4227 Score: 2.2 R03G\_05523  
Query: 1 TCTGGTACCAATCTTTCA 18  
:\*|||||\*|  
Sbjct: 679 GAACCATGGTTAGAAAAT 662

>miR4227 Score: 2.5 R03G\_05788  
Query: 1 TCTGGTACCAATCTTTCA 18  
|||\*\*:|||  
Sbjct: 1301 AGAAGGTGGTTAGAAAGT 1284

>miR4227 Score: 0.0 R03G\_05928  
Query: 1 TCTGGTACCAATCTTTCA 18  
|||||  
Sbjct: 451 AGACCATGGTTAGAAAGT 434

>miR4227 Score: 1.0 R03G\_04676  
Query: 1 TCTGGTACCAATCTTTCA 18  
|||||\*|||  
Sbjct: 679 AGACCATGGTTAGTAAGT 662

>miR4227 Score: 2.5 R03G\_05187  
Query: 1 TCTGGTACCAATCTTTCA 18  
|||||\*|||\*|:|  
Sbjct: 272 AGACCAAGGTTAAAGAGT 255

>miR4227 Score: 2.5 R03G\_03478  
Query: 1 TCTGGTACCAATCTTTCA 18  
||||:|\*|||:|\*|  
Sbjct: 711 AGACCGTAGTTAGGAAGC 694

>miR4227 Score: 2.2 R03G\_03767  
Query: 1 TCTGGTACCAATCTTTCA 18  
:\*|||||\*|  
Sbjct: 679 GAACCATGGTTAGAAAAT 662

>miR4227 Score: 2.5 R03G\_00192  
Query: 1 TCTGGTACCAATCTTTCA 18  
|||||\*|||:|\*|  
Sbjct: 973 AGACCATGGTAAGAGA-T 957

>miR4227 Score: 2.0 R03G\_01667  
Query: 1 TCTGGTACCAATCTTTCA 18  
|\*|||||\*|||  
Sbjct: 853 AAACCATGTTTAGAAAGT 836

>miR4227 Score: 2.2 R03G\_01949  
Query: 1 TCTGGTACCAATCTTTCA 18  
:\*|||||\*|  
Sbjct: 679 GAACCATGGTTAGAAAAT 662

>miR4227 Score: 2.2 R03G\_01968  
Query: 1 TCTGGTACCAATCTTTCA 18  
:\*|||||\*|  
Sbjct: 679 GAACCATGGTTAGAAAAT 662

>miR4227 Score: 2.2 R03G\_17380

Query: 1 TCTGGTACCAATCTTTCA 18  
:\*|||||\*|  
Sbjct: 679 GAACCATGGTTAGAAAAT 662  
>miR4227 Score: 2.0 R03G\_16937  
Query: 1 TCTGGTACCAATCTTTCA 18  
|||:|||||\*|||  
Sbjct: 296 AGATTATGGTTAAAAAGT 279  
>miR8048-5p Score: 2.0 R03G\_15517  
Query: 1 CATCATTACATTCCATCTG 19  
||:|||:|||||\*|||  
Sbjct: 462 GTGGTAGTGTAAGGAAGAC 444  
>miR8048-5p Score: 2.5 R03G\_12453  
Query: 1 CATCATTACATTCCATCTG 19  
\*|||||\*||:|||||\*  
Sbjct: 625 TTAGTAAGGTGAGGTAGAA 607  
>miR8048-5p Score: 2.5 R03G\_11678  
Query: 1 CATCATTACATTCCATCTG 19  
\*|||||:|||||\*|||\*  
Sbjct: 258 ATAGTAGTGTAAGTTAGAA 240  
>miR8048-5p Score: 2.5 R03G\_06144  
Query: 1 CATCATTACATTCCATCTG 19  
|\*|||||\*|\*  
Sbjct: 474 GAAGTAATGTAAGGTACAA 456  
>miR8048-5p Score: 2.5 R03G\_01072  
Query: 1 CATCATTACATTCCATCTG 19  
|||||:||||\*|||\*||  
Sbjct: 2982 GTAGTAGTGTAATGTA-AC 2965  
>miR1320-5p Score: 2.2 R03G\_04749  
Query: 1 TGGGAAGGAGTGTAAGTTTATAG 22  
:|||||:|:|||||\*||\*|  
Sbjct: 88 GCCTTCCTTATATTCAATTACC 67  
>miR1320-5p Score: 2.5 R03G\_04767  
Query: 1 TGGGAAGGAGTGTAAGTTTATAG 22  
\*|:|||\*||:|||||  
Sbjct: 216 TCTTTCGTCGCATTCAAATATC 195  
>miR869.1 Score: 0.0 R03G\_16822  
Query: 1 TGGGTTCAAGTCTGGTGATTG 21  
|||||  
Sbjct: 270 ACCCAAGTTCAGACCACTAAC 250  
>miR869.1 Score: 0.5 R03G\_16824  
Query: 1 TGGGTTCAAGTCTGGTGATTG 21  
|||||:|||||  
Sbjct: 270 ACCCAAGTTCAGGCCACTAAC 250  
>miR869.1 Score: 0.5 R03G\_16807  
Query: 1 TGGGTTCAAGTCTGGTGATTG 21

|||||||:|||||  
Sbjct: 831 ACCCAAGTTCAGGCCACTAAC 811  
>miR869.1 Score: 2.5 R03G\_16699  
Query: 1 TGGGTTCAAGTCTGGTGATTG 21  
||||||\*||\*||:|||||  
Sbjct: 825 ACCCAAGTCCAGTCCGCTAAC 805  
>miR869.1 Score: 0.0 R03G\_16551  
Query: 1 TGGGTTCAAGTCTGGTGATTG 21  
|||||||  
Sbjct: 831 ACCCAAGTTCAGACCACTAAC 811  
>miR869.1 Score: 0.0 R03G\_16555  
Query: 1 TGGGTTCAAGTCTGGTGATTG 21  
|||||||  
Sbjct: 831 ACCCAAGTTCAGACCACTAAC 811  
>miR869.1 Score: 0.0 R03G\_15675  
Query: 1 TGGGTTCAAGTCTGGTGATTG 21  
|||||||  
Sbjct: 831 ACCCAAGTTCAGACCACTAAC 811  
>miR869.1 Score: 1.8 R03G\_15287  
Query: 1 TGGGTTCAAGTCTGGTGATTG 21  
|||:||||||\*||||:||  
Sbjct: 465 ACCTAAGTTCAGTCCACTGAC 445  
>miR869.1 Score: 0.5 R03G\_14359  
Query: 1 TGGGTTCAAGTCTGGTGATTG 21  
|||||||:|||||  
Sbjct: 831 ACCCAAGTTCAGGCCACTAAC 811  
>miR869.1 Score: 0.5 R03G\_13456  
Query: 1 TGGGTTCAAGTCTGGTGATTG 21  
|||||||:|||||  
Sbjct: 228 ACCCAAGTTCAGGCCACTAAC 208  
>miR869.1 Score: 0.0 R03G\_13727  
Query: 1 TGGGTTCAAGTCTGGTGATTG 21  
|||||||  
Sbjct: 270 ACCCAAGTTCAGACCACTAAC 250  
>miR869.1 Score: 0.0 R03G\_13737  
Query: 1 TGGGTTCAAGTCTGGTGATTG 21  
|||||||  
Sbjct: 270 ACCCAAGTTCAGACCACTAAC 250  
>miR869.1 Score: 0.0 R03G\_13848  
Query: 1 TGGGTTCAAGTCTGGTGATTG 21  
|||||||  
Sbjct: 831 ACCCAAGTTCAGACCACTAAC 811  
>miR869.1 Score: 2.2 R03G\_12664  
Query: 1 TGGGTTCAAGTCTGGTGATTG 21  
|||:||||||:||\*||:||

Sbjct: 558 ACCTAAGTTCAGGCCCTGAC 538  
>miR869.1 Score: 0.5 R03G\_13151  
Query: 1 TGGGTTCAAGTCTGGTGATTG 21  
|||||||:|||||||  
Sbjct: 831 ACCCAAGTTCAGGCCACTAAC 811  
>miR869.1 Score: 2.5 R03G\_12177  
Query: 1 TGGGTTCAAGTCTGGTGATTG 21  
|||||||\*||\*||:|||||  
Sbjct: 825 ACCCAAGTCCAGTCCGCTAAC 805  
>miR869.1 Score: 2.5 R03G\_11267  
Query: 1 TGGGTTCAAGTCTGGTGATTG 21  
|||||||\*||\*||:|||||  
Sbjct: 825 ACCCAAGTCCAGTCCGCTAAC 805  
>miR869.1 Score: 2.5 R03G\_11280  
Query: 1 TGGGTTCAAGTCTGGTGATTG 21  
|||||||\*||\*||:|||||  
Sbjct: 633 ACCCAAGTCCAGTCCGCTAAC 613  
>miR869.1 Score: 0.0 R03G\_11401  
Query: 1 TGGGTTCAAGTCTGGTGATTG 21  
|||||||:|||||||  
Sbjct: 831 ACCCAAGTTCAGACCACTAAC 811  
>miR869.1 Score: 0.0 R03G\_11773  
Query: 1 TGGGTTCAAGTCTGGTGATTG 21  
|||||||:|||||||  
Sbjct: 831 ACCCAAGTTCAGACCACTAAC 811  
>miR869.1 Score: 0.5 R03G\_10235  
Query: 1 TGGGTTCAAGTCTGGTGATTG 21  
|||||||:|||||||  
Sbjct: 831 ACCCAAGTTCAGGCCACTAAC 811  
>miR869.1 Score: 2.5 R03G\_10549  
Query: 1 TGGGTTCAAGTCTGGTGATTG 21  
|||||||\*||\*||:|||||  
Sbjct: 825 ACCCAAGTCCAGTCCGCTAAC 805  
>miR869.1 Score: 0.5 R03G\_10732  
Query: 1 TGGGTTCAAGTCTGGTGATTG 21  
|||||||:|||||||  
Sbjct: 831 ACCCAAGTTCAGGCCACTAAC 811  
>miR869.1 Score: 0.5 R03G\_09483  
Query: 1 TGGGTTCAAGTCTGGTGATTG 21  
|||||||:|||||||  
Sbjct: 831 ACCCAAGTTCAGGCCACTAAC 811  
>miR869.1 Score: 0.5 R03G\_09499  
Query: 1 TGGGTTCAAGTCTGGTGATTG 21  
|||||||:|||||||  
Sbjct: 831 ACCCAAGTTCAGGCCACTAAC 811

>miR869.1 Score: 1.0 R03G\_09544  
Query: 1 TGGGTTCAAGTCTGGTGATTG 21  
|||||||:||||  
Sbjct: 831 ACCCAAGTTCAGGCCATTAAC 811

>miR869.1 Score: 0.0 R03G\_09607  
Query: 1 TGGGTTCAAGTCTGGTGATTG 21  
|||||||  
Sbjct: 831 ACCCAAGTTCAGACCACTAAC 811

>miR869.1 Score: 2.5 R03G\_07995  
Query: 1 TGGGTTCAAGTCTGGTGATTG 21  
|||||||\*||\*||:||||  
Sbjct: 732 ACCCAAGTCCAGTCCGCTAAC 712

>miR869.1 Score: 0.0 R03G\_08661  
Query: 1 TGGGTTCAAGTCTGGTGATTG 21  
|||||||  
Sbjct: 831 ACCCAAGTTCAGACCACTAAC 811

>miR869.1 Score: 0.0 R03G\_08846  
Query: 1 TGGGTTCAAGTCTGGTGATTG 21  
|||||||  
Sbjct: 831 ACCCAAGTTCAGACCACTAAC 811

>miR869.1 Score: 0.5 R03G\_07303  
Query: 1 TGGGTTCAAGTCTGGTGATTG 21  
|||||||:|||||||  
Sbjct: 831 ACCCAAGTTCAGGCCACTAAC 811

>miR869.1 Score: 2.2 R03G\_07688  
Query: 1 TGGGTTCAAGTCTGGTGATTG 21  
|||:|||||\*|:||||:|  
Sbjct: 831 ACCTAAGTCTGGCCACTGAC 811

>miR869.1 Score: 0.0 R03G\_07706  
Query: 1 TGGGTTCAAGTCTGGTGATTG 21  
|||||||  
Sbjct: 168 ACCCAAGTTCAGACCACTAAC 148

>miR869.1 Score: 0.5 R03G\_07875  
Query: 1 TGGGTTCAAGTCTGGTGATTG 21  
|||||||:|||||||  
Sbjct: 831 ACCCAAGTTCAGGCCACTAAC 811

>miR869.1 Score: 0.5 R03G\_05622  
Query: 1 TGGGTTCAAGTCTGGTGATTG 21  
|||||||:|||||||  
Sbjct: 831 ACCCAAGTTCAGGCCACTAAC 811

>miR869.1 Score: 0.0 R03G\_05635  
Query: 1 TGGGTTCAAGTCTGGTGATTG 21  
|||||||  
Sbjct: 831 ACCCAAGTTCAGACCACTAAC 811

>miR869.1 Score: 2.5 R03G\_05904

Query: 1 TGGGTTCAAGTCTGGTGATTG 21  
|||||||\*||\*||:|||||  
Sbjct: 825 ACCCAAGTCCAGTCCGCTAAC 805  
>miR869.1 Score: 0.5 R03G\_05915  
Query: 1 TGGGTTCAAGTCTGGTGATTG 21  
|||||||:|||||||  
Sbjct: 831 ACCCAAGTTCAGGCCACTAAC 811  
>miR869.1 Score: 0.5 R03G\_06423  
Query: 1 TGGGTTCAAGTCTGGTGATTG 21  
|||||||:|||||||  
Sbjct: 885 ACCCAAGTTCAGGCCACTAAC 865  
>miR869.1 Score: 0.0 R03G\_06441  
Query: 1 TGGGTTCAAGTCTGGTGATTG 21  
|||||||:|||||||  
Sbjct: 831 ACCCAAGTTCAGACCACTAAC 811  
>miR869.1 Score: 0.5 R03G\_05336  
Query: 1 TGGGTTCAAGTCTGGTGATTG 21  
|||||||:|||||||  
Sbjct: 831 ACCCAAGTTCAGGCCACTAAC 811  
>miR869.1 Score: 0.0 R03G\_02689  
Query: 1 TGGGTTCAAGTCTGGTGATTG 21  
|||||||:|||||||  
Sbjct: 831 ACCCAAGTTCAGACCACTAAC 811  
>miR869.1 Score: 1.8 R03G\_02844  
Query: 1 TGGGTTCAAGTCTGGTGATTG 21  
|||:|||||||\*|||||:||  
Sbjct: 609 ACCTAAGTTCAGTCCACTGAC 589  
>miR869.1 Score: 0.0 R03G\_03571  
Query: 1 TGGGTTCAAGTCTGGTGATTG 21  
|||||||:|||||||  
Sbjct: 831 ACCCAAGTTCAGACCACTAAC 811  
>miR869.1 Score: 1.0 R03G\_03616  
Query: 1 TGGGTTCAAGTCTGGTGATTG 21  
|\*|||||||:|||||||  
Sbjct: 270 AGCCAAGTTCAGACCACTAAC 250  
>miR869.1 Score: 1.8 R03G\_03766  
Query: 1 TGGGTTCAAGTCTGGTGATTG 21  
|||:|||||||\*|||||:||  
Sbjct: 609 ACCTAAGTTCAGTCCACTGAC 589  
>miR869.1 Score: 0.5 R03G\_00681  
Query: 1 TGGGTTCAAGTCTGGTGATTG 21  
|||||||:|||||||  
Sbjct: 831 ACCCAAGTTCAGGCCACTAAC 811  
>miR869.1 Score: 2.5 R03G\_01305  
Query: 1 TGGGTTCAAGTCTGGTGATTG 21

```
|||||||*||*||:|||||
Sbjct: 825 ACCCAAGTCCAGTCCGCTAAC 805
>miR869.1 Score: 1.0 R03G_01322
Query: 1 TGGGTTCAAGTCTGGTGATTG 21
|||||||:|||||||
Sbjct: 717 ACCCAAGTTCAGGTCACCTAAC 697
>miR869.1 Score: 0.5 R03G_01652
Query: 1 TGGGTTCAAGTCTGGTGATTG 21
|||||||:|||||||
Sbjct: 831 ACCCAAGTTCAGGCCACTAAC 811
>miR869.1 Score: 0.5 R03G_01730
Query: 1 TGGGTTCAAGTCTGGTGATTG 21
|||||||:|||||||
Sbjct: 831 ACCCAAGTTCAGGCCACTAAC 811
>miR869.1 Score: 0.0 R03G_01956
Query: 1 TGGGTTCAAGTCTGGTGATTG 21
|||||||:|||||||
Sbjct: 831 ACCCAAGTTCAGACCTAAC 811
>miR869.1 Score: 0.5 R03G_17400
Query: 1 TGGGTTCAAGTCTGGTGATTG 21
|||||||:|||||||
Sbjct: 705 ACCCAAGTTCAGGCCACTAAC 685
>miR869.1 Score: 0.5 R03G_17382
Query: 1 TGGGTTCAAGTCTGGTGATTG 21
|||||||:|||||||
Sbjct: 831 ACCCAAGTTCAGGCCACTAAC 811
>miR869.1 Score: 0.0 R03G_17285
Query: 1 TGGGTTCAAGTCTGGTGATTG 21
|||||||:|||||||
Sbjct: 831 ACCCAAGTTCAGACCTAAC 811
>miR447a-3p Score: 0.0 R03G_15872
Query: 1 TTGCGGACGAGAATTTTGTG 20
|||||||:|||||||
Sbjct: 130 AACGCCTGCTCTTAAAACAC 111
>miR447a-3p Score: 2.5 R03G_11868
Query: 1 TTGCGGACGAGAATTTTGTG 20
||*|||||*|||||*|
Sbjct: 843 AACTCCTGCTATTAAAAC-C 825
>miR4412-5p Score: 0.5 R03G_16716
Query: 1 TGTTGCGGATATTCTTTGCACT 22
|||||||:|||||||
Sbjct: 355 ACAACGCCTATAGGAAACGTGA 334
>miR4412-5p Score: 0.5 R03G_16373
Query: 1 TGTTGCGGATATTCTTTGCACT 22
|||||||:|||||||*|||
```



Sbjct: 229 ACAACGCCTATAAGAAACATGA 208  
>miR4412-5p Score: 0.5 R03G\_16554  
Query: 1 TGTTGCGGATATTCTTTGCACT 22  
|||||\*||  
Sbjct: 376 ACAACGCCTATAAGAAACGCGA 355  
>miR4412-5p Score: 0.0 R03G\_16146  
Query: 1 TGTTGCGGATATTCTTTGCACT 22  
|||||  
Sbjct: 406 ACAACGCCTATAAGAAACGTGA 385  
>miR4412-5p Score: 2.0 R03G\_14895  
Query: 1 TGTTGCGGATATTCTTTGCACT 22  
||:||||:||||:||||\*|||  
Sbjct: 139 ACGACGTCTATGAGAAACCTGA 118  
>miR4412-5p Score: 0.5 R03G\_15146  
Query: 1 TGTTGCGGATATTCTTTGCACT 22  
|||||\*||  
Sbjct: 256 ACAACGCCTATAAGAAACGCGA 235  
>miR4412-5p Score: 0.5 R03G\_15251  
Query: 1 TGTTGCGGATATTCTTTGCACT 22  
|||||\*|||  
Sbjct: 337 ACAACGCCTATAAGAAACATGA 316  
>miR4412-5p Score: 0.0 R03G\_12466  
Query: 1 TGTTGCGGATATTCTTTGCACT 22  
|||||  
Sbjct: 229 ACAACGCCTATAAGAAACGTGA 208  
>miR4412-5p Score: 2.5 R03G\_11240  
Query: 1 TGTTGCGGATATTCTTTGCACT 22  
|\*||||:||||\*|||||  
Sbjct: 199 AGAACGTCTATAAAAAACGTGA 178  
>miR4412-5p Score: 2.5 R03G\_11266  
Query: 1 TGTTGCGGATATTCTTTGCACT 22  
|\*||||:||||\*|||||  
Sbjct: 199 AGAACGTCTATAAAAAACGTGA 178  
>miR4412-5p Score: 0.0 R03G\_10239  
Query: 1 TGTTGCGGATATTCTTTGCACT 22  
|||||  
Sbjct: 370 ACAACGCCTATAAGAAACGTGA 349  
>miR4412-5p Score: 0.5 R03G\_09616  
Query: 1 TGTTGCGGATATTCTTTGCACT 22  
||:|||||  
Sbjct: 370 ACAGCGCCTATAAGAAACGTGA 349  
>miR4412-5p Score: 0.5 R03G\_07031  
Query: 1 TGTTGCGGATATTCTTTGCACT 22  
|||||\*||  
Sbjct: 376 ACAACGCCTATAAGAAACGCGA 355



Query: 1 TGTTGCGGATATTCTTTGCACT 22  
|||||\*|||  
Sbjct: 580 ACAACGCCTATAAGAAACATGA 559  
>miR4412-5p Score: 0.0 R03G\_17448  
Query: 1 TGTTGCGGATATTCTTTGCACT 22  
|||||  
Sbjct: 370 ACAACGCCTATAAGAAACGTGA 349  
>miR477 Score: 2.5 R03G\_10629  
Query: 1 TTGGAGTATCTTTGGAGGAGC 21  
|||||\*||\*||\*|||  
Sbjct: 325 AACCTCATAAAAAGCTC-TCG 306  
>miR5632-5p Score: 2.5 R03G\_16460  
Query: 1 TGTCATTCTTTATCCAACCTG 20  
||\*\*|||||\*||  
Sbjct: 2405 ACTATAAGAAATAGGTTAAC 2386  
>miR5632-5p Score: 2.5 R03G\_10250  
Query: 1 TGTCATTCTTTATCCAACCTG 20  
\*:\*|||||  
Sbjct: 1541 TTGTTAAGAAATAGGTTGAC 1522  
>miR5632-5p Score: 2.2 R03G\_10750  
Query: 1 TGTCATTCTTTATCCAACCTG 20  
||\*|||:|||||\*|:  
Sbjct: 254 ACTGTAGGAAATAGGTTTAT 235  
>miR5632-5p Score: 0.0 R03G\_08617  
Query: 1 TGTCATTCTTTATCCAACCTG 20  
|||||  
Sbjct: 1708 ACAGTAAGAAATAGGTTGAC 1689  
>miR5632-5p Score: 0.0 R03G\_05328  
Query: 1 TGTCATTCTTTATCCAACCTG 20  
|||||  
Sbjct: 781 ACAGTAAGAAATAGGTTGAC 762  
>miR5632-5p Score: 2.2 R03G\_17115  
Query: 1 TGTCATTCTTTATCCAACCTG 20  
|:|\*|||||\*:  
Sbjct: 961 ATAGAAAGAAATAGGTTGTT 942  
>miR5163b-3p Score: 1.5 R03G\_15290  
Query: 1 TAGATACTTTGGTTGTGGGA 20  
|||||\*:|||  
Sbjct: 154 ATCTATAGAACCAACACCCT 135  
>miR5163b-3p Score: 0.5 R03G\_15497  
Query: 1 TAGATACTTTGGTTGTGGGA 20  
|||||:|||||  
Sbjct: 154 ATCTATGGAACCAACACCCT 135  
>miR5163b-3p Score: 1.5 R03G\_13307  
Query: 1 TAGATACTTTGGTTGTGGGA 20

||||\*||:|||||||  
Sbjct: 187 ATCTTTGGAACCAACACCCT 168  
>miR5163b-3p Score: 1.5 R03G\_12685  
Query: 1 TAGATACTTTGGTTGTGGGA 20  
|\*||||:|||||||  
Sbjct: 208 ACCTATGGAACCAACACCCT 189  
>miR5163b-3p Score: 1.0 R03G\_13022  
Query: 1 TAGATACTTTGGTTGTGGGA 20  
|||||:|||||:|||  
Sbjct: 226 ATCTATGGAACCAACATCCT 207  
>miR5163b-3p Score: 0.0 R03G\_12243  
Query: 1 TAGATACTTTGGTTGTGGGA 20  
|||||||  
Sbjct: 226 ATCTATGAAACCAACACCCT 207  
>miR5163b-3p Score: 0.5 R03G\_12446  
Query: 1 TAGATACTTTGGTTGTGGGA 20  
|||||:|||||||  
Sbjct: 226 ATCTATGGAACCAACACCCT 207  
>miR5163b-3p Score: 0.0 R03G\_10657  
Query: 1 TAGATACTTTGGTTGTGGGA 20  
|||||||  
Sbjct: 226 ATCTATGAAACCAACACCCT 207  
>miR5163b-3p Score: 2.5 R03G\_08353  
Query: 1 TAGATACTTTGGTTGTGGGA 20  
\*||\*:|||||||\*||  
Sbjct: 440 TTCAGTGAAACCAACAC-CT 422  
>miR5163b-3p Score: 1.0 R03G\_08447  
Query: 1 TAGATACTTTGGTTGTGGGA 20  
|||||:|||||:|||  
Sbjct: 226 ATCTATGGAACCAACATCCT 207  
>miR5163b-3p Score: 0.5 R03G\_09087  
Query: 1 TAGATACTTTGGTTGTGGGA 20  
|||||:|||||||  
Sbjct: 226 ATCTATGGAACCAACACCCT 207  
>miR5163b-3p Score: 2.5 R03G\_05552  
Query: 1 TAGATACTTTGGTTGTGGGA 20  
:||\*||||:|||||:  
Sbjct: 208 GTCTCTGAAATTAACACCTT 189  
>miR5163b-3p Score: 0.5 R03G\_05724  
Query: 1 TAGATACTTTGGTTGTGGGA 20  
|||||:|||||||  
Sbjct: 187 ATCTATGGAACCAACACCCT 168  
>miR5163b-3p Score: 0.5 R03G\_04502  
Query: 1 TAGATACTTTGGTTGTGGGA 20  
|||||:|||||||

Sbjct: 226 ATCTATGGAACCAACACCCT 207  
>miR5163b-3p Score: 2.5 R03G\_05035  
Query: 1 TAGATACTTTGGTTGTGGGA 20  
:|||||||:|||||\*\*:  
Sbjct: 970 GTCTATGAAATCAACA-ATT 952  
>miR5163b-3p Score: 0.0 R03G\_02942  
Query: 1 TAGATACTTTGGTTGTGGGA 20  
|||||||  
Sbjct: 226 ATCTATGAAACCAACACCCT 207  
>miR5163b-3p Score: 0.5 R03G\_03523  
Query: 1 TAGATACTTTGGTTGTGGGA 20  
||||||:|||||||  
Sbjct: 226 ATCTATGGAACCAACACCCT 207  
>miR5163b-3p Score: 1.5 R03G\_03564  
Query: 1 TAGATACTTTGGTTGTGGGA 20  
||||||:|:||||||\*|  
Sbjct: 639 ATCTATGGAATCAACACCAT 620  
>miR5163b-3p Score: 2.5 R03G\_03712  
Query: 1 TAGATACTTTGGTTGTGGGA 20  
\*|||||\*:||||||:||||  
Sbjct: 79 TTCTATTGAACCAACGCCCT 60  
>miR5163b-3p Score: 2.0 R03G\_03971  
Query: 1 TAGATACTTTGGTTGTGGGA 20  
||||\*|:|||||||:|||  
Sbjct: 226 ATCTAAGGAACCAACATCCT 207  
>miR5163b-3p Score: 0.5 R03G\_04017  
Query: 1 TAGATACTTTGGTTGTGGGA 20  
||||||:|||||||  
Sbjct: 226 ATCTATGGAACCAACACCCT 207  
>miR5163b-3p Score: 0.5 R03G\_01530  
Query: 1 TAGATACTTTGGTTGTGGGA 20  
||||||:|||||||  
Sbjct: 226 ATCTATGGAACCAACACCCT 207  
>miR1522 Score: 2.5 R03G\_13498  
Query: 1 TTTATTGTTAAGCATGAAAG 20  
|||||||:|:|:|\*|||  
Sbjct: 501 AAATAACAGTTTGTATGTTC 482  
>miR1052 Score: 2.2 R03G\_09342  
Query: 1 TTCCTATTTTATTGACTGTGTTA 23  
||\*||\*|||||||:|  
Sbjct: 24 AACGAAAAAATAACTGACACAGT 2  
>miR8148 Score: 0.5 R03G\_16424  
Query: 1 TGATTGGGTCTGCATGCCGTGGT 23  
|||||||:|||||||  
Sbjct: 254 ACTAACCCAGACGTATGGCACCA 232

```

>miR950 Score: 2.5 R03G_14208
Query: 1 TCTGGTCAGCTGGTTTGAT 19
||||:|*|||||||*||
Sbjct: 172 AGACTACTCGACCAAA-TA 155
>miR950 Score: 2.5 R03G_13428
Query: 1 TCTGGTCAGCTGGTTTGAT 19
*|||::|||||*|||||
Sbjct: 1840 TGACTGGTCGACAAAATA 1822
>miR950 Score: 2.2 R03G_09575
Query: 1 TCTGGTCAGCTGGTTTGAT 19
*|||||||*|:|||||:
Sbjct: 310 CGACCAGTCGTTCAAACG 292
>miR950 Score: 2.5 R03G_08593
Query: 1 TCTGGTCAGCTGGTTTGAT 19
|*||:||||*|||||||
Sbjct: 130 ATACTAGTCAACCAAATA 112
>miR950 Score: 2.5 R03G_05312
Query: 1 TCTGGTCAGCTGGTTTGAT 19
||||*|||*|||||||*|
Sbjct: 506 AGACCTGTCTACCAAAC-A 489
>miR950 Score: 1.5 R03G_03353
Query: 1 TCTGGTCAGCTGGTTTGAT 19
||||:|||||||:|||*|
Sbjct: 190 AGACTAGTCGACCGAACCA 172
>miR950 Score: 2.5 R03G_03724
Query: 1 TCTGGTCAGCTGGTTTGAT 19
||||:|*|||||||*||
Sbjct: 172 AGACTACTCGACCAAA-TA 155
>miR950 Score: 2.5 R03G_04130
Query: 1 TCTGGTCAGCTGGTTTGAT 19
||:|||*|:||||:||||
Sbjct: 566 AGGCCACTTGACCGAACTA 548
>miR950 Score: 2.0 R03G_01135
Query: 1 TCTGGTCAGCTGGTTTGAT 19
*||||*|||||:|||||
Sbjct: 2839 TGACCATTCGACTAAATA 2821
>miR9486a Score: 2.0 R03G_11550
Query: 1 TCTTTCAAGAGTTAGAGGTT 21
|||||||*|:|:|:|
Sbjct: 566 AGAAAGTTCTATTTCTAGG 546
>miR9486a Score: 2.5 R03G_07328
Query: 1 TCTTTCAAGAGTTAGAGGTT 21
|||||*|||:|||:|*||
Sbjct: 877 AGAAAGATCTTAATTTT-AAG 858
>miR9486a Score: 1.8 R03G_06014

```

Query: 1 TCTTTCAAGAGTTAGAGGTTTC 21  
|||||||:|::|\*  
Sbjct: 57 AGAAAGTTCTCAATTTTAAAC 37  
>miR9486a Score: 2.5 R03G\_00830  
Query: 1 TCTTTCAAGAGTTAGAGGTTTC 21  
|||||||:|\*||\*|||  
Sbjct: 602 AGAAAGTTCTTACTCTACAAG 582  
>miR6266a Score: 2.2 R03G\_13524  
Query: 1 TATATGCAGGCGCAAAT-AT 20  
:|\*|||:|\*||  
Sbjct: 2686 GTAGACGTCCGCTGTTTAATA 2666  
>miR847-3p Score: 2.2 R03G\_12785  
Query: 1 TGACTCCTCTTCTTCTGG-TCG 21  
:|\*|||:|\*||:  
Sbjct: 303 GCTTAGGAGAAGAAGACTAAGT 282  
>miR847-3p Score: 2.0 R03G\_02368  
Query: 1 TGACTCCTCTTCTTCTGGTCG 21  
|||\*|||:|\*||\*|  
Sbjct: 243 ACTGAAGAGAGGAAGACCACC 223  
>miR847-3p Score: 2.0 R03G\_03499  
Query: 1 TGACTCCTCTTCTTCTGGTCG 21  
||\*|||:|\*||\*|  
Sbjct: 2118 ACAGAGGAGAAGAAGAC-AAC 2099  
>miR822-5p Score: 2.5 R03G\_14440  
Query: 1 TGCGAAAGCATTGCGCAAG 19  
\*\*|||:|\*||  
Sbjct: 2182 TAGCTTTCGTAAATGGTCC 2164  
>miR822-5p Score: 2.5 R03G\_13777  
Query: 1 TGCGAAAGCATTGCGCAAG 19  
|||\*|||:|\*||  
Sbjct: 1033 ACGCTTATGTAAATGGT-C 1016  
>miR822-5p Score: 2.5 R03G\_12088  
Query: 1 TGCGAAAGCATTGCGCAAG 19  
|||\*|||:|\*||  
Sbjct: 329 ACGTATTCGTAGACGGT-C 312  
>miR822-5p Score: 2.5 R03G\_12467  
Query: 1 TGCGAAAGCATTGCGCAAG 19  
|||\*|||:|\*||  
Sbjct: 194 ACGTATTCGTAGACGGT-C 177  
>miR822-5p Score: 2.2 R03G\_11521  
Query: 1 TGCGAAAGCATTGCGCAAG 19  
:|\*|||:|\*||  
Sbjct: 1552 GCGGTTTCGTAAAGCGGT-C 1535  
>miR822-5p Score: 2.5 R03G\_10792  
Query: 1 TGCGAAAGCATTGCGCAAG 19

|||:\*|||:|||||\*  
Sbjct: 332 ACGTATTCGTAGACGGTTA 314  
>miR822-5p Score: 2.5 R03G\_06858  
Query: 1 TGCGAAAGCATTGCGCAAG 19  
\*||:||||\*|||||\*  
Sbjct: 45 CCGTTTTCATAAACGGTTA 27  
>miR822-5p Score: 2.5 R03G\_07964  
Query: 1 TGCGAAAGCATTGCGCAAG 19  
:\*|||||:||||:  
Sbjct: 766 GTTCTTTCGTAAATGGTTT 748  
>miR822-5p Score: 2.5 R03G\_06260  
Query: 1 TGCGAAAGCATTGCGCAAG 19  
:\*|||||\*  
Sbjct: 693 TTTCTTTCGTAAACGGTAC 675  
>miR822-5p Score: 2.2 R03G\_06339  
Query: 1 TGCGAAAGCATTGCGCAA-G 19  
:||:|||:||:|||||\*|  
Sbjct: 200 GCGTTTTTGTGAACGGTTAC 181  
>miR822-5p Score: 2.5 R03G\_04523  
Query: 1 TGCGAAAGCATTGCGCAAG 19  
|\*||\*||||:|||||  
Sbjct: 246 AAGCGTTCGTGAACGGTTC 228  
>miR822-5p Score: 2.5 R03G\_03576  
Query: 1 TGCGAAAGCATTGCGCAAG 19  
|||:\*||||:||||\*|  
Sbjct: 281 ACGTATTCGTAGACGGT-C 264  
>miR822-5p Score: 2.5 R03G\_03795  
Query: 1 TGCGAAAGCATTGCGCAAG 19  
|||:\*||||:||||\*|  
Sbjct: 281 ACGTATTCGTAGACGGT-C 264  
>miR7761-3p Score: 2.0 R03G\_14788  
Query: 1 TCTCGAATCAAGGACGCTCTGG 22  
|||||||\*||\*|||||  
Sbjct: 259 AGAGCTTAGATCCCGGAGACC 238  
>miR7761-3p Score: 2.0 R03G\_14801  
Query: 1 TCTCGAATCAAGGACGCTCTGG 22  
|||||||\*||\*|||||  
Sbjct: 259 AGAGCTTAGATCCCGGAGACC 238  
>miR3510 Score: 2.5 R03G\_09902  
Query: 1 TTAACCATCTTTCGGGACTGAA 22  
\*|||||||:|:||\*||\*  
Sbjct: 1153 CATTGGTAGAAGGTCCT-ACTA 1133  
>miR3510 Score: 1.8 R03G\_06495  
Query: 1 TTAACCATCTTTCGGGACTGAA 22  
|||||||:||\*||:|



Sbjct: 1084 AATTGGTAGAAAGTCCAGATTT 1063  
>miR842 Score: 2.0 R03G\_12444  
Query: 1 TATGGTCCCAGATCCGTCA-ACC 22  
\*||||:||||:|||||||\*|||

Sbjct: 830 TTACCGGGTTTAGGCAGTATGG 808  
>miR9667-5p Score: 2.5 R03G\_14530  
Query: 1 AAATTGGCAAACATGGTTG 19  
\*||||:|||||||\*::

Sbjct: 354 GTTAACTGTTTGTACCCGT 336  
>miR9667-5p Score: 2.5 R03G\_14023  
Query: 1 AAATTGGCAAACATGGTTG 19  
\*||||:||||\*|||:|||

Sbjct: 1643 CTTAACTGTTTCTACTAAC 1625  
>miR9667-5p Score: 2.5 R03G\_13643  
Query: 1 AAATTGGCAAACATGGTTG 19  
|||||||\*|||:||

Sbjct: 3365 TTTAACCGTTTAAACCGAC 3347  
>miR9667-5p Score: 1.8 R03G\_12615  
Query: 1 AAATTGGCAAACATGGTTG 19  
\*|||||||:||\*:

Sbjct: 386 GTTAACCGTTTGTATCA-T 369  
>miR9667-5p Score: 2.2 R03G\_11619  
Query: 1 AAATTGGCAAACATGGTTG 19  
|||||||\*|||\*|||:

Sbjct: 567 TTTAACCGTTTGTCCAAT 549  
>miR9667-5p Score: 2.5 R03G\_11879  
Query: 1 AAATTGGCAAACATGGTTG 19  
|||\*|||||||:|:|\*

Sbjct: 5513 TTTCACCGTTTGTATCGAA 5495  
>miR9667-5p Score: 2.0 R03G\_09699  
Query: 1 AAATTGGCAAACATGGTT-G 19  
\*\*|||||||\*|||

Sbjct: 1076 CCTAACCGTTTGTACCAAAC 1057  
>miR9667-5p Score: 2.5 R03G\_08916  
Query: 1 AAATTGGCAAACATGGTTG 19  
||||:||||\*||||:\*

Sbjct: 1328 TTTAATCGTTGGTACCGTC 1310  
>miR9667-5p Score: 2.5 R03G\_04417  
Query: 1 AAATTGGCAAACATGGTTG 19  
||||:|||||||\*|||

Sbjct: 1301 TTTAGCCGTTTGTAGAAAC 1283  
>miR9667-5p Score: 2.5 R03G\_03060  
Query: 1 AAATTGGCAAACATGGTTG 19  
|||:|||||||\*|||\*||

Sbjct: 1115 TTTGACCGTTTTTACCCAC 1097

>miR9667-5p Score: 2.5 R03G\_04061  
Query: 1 AAATTGGCAAACATGGTTG 19  
||||:\*|||||||:|\*|  
Sbjct: 56 TTTAATAGTTTGTACTACC 38

>miR9667-5p Score: 2.5 R03G\_01886  
Query: 1 AAATTGGCAAACATGGTTG 19  
||||||\*||||||:|:\*|  
Sbjct: 53 TTTAACCCCTTTGTATCG-C 36

>miR7807a-3p Score: 0.0 R03G\_16691  
Query: 1 TGAGGATTTGCATACATAC 19  
|||||||  
Sbjct: 284 ACTCCTAAACGTATGTATG 266

>miR7807a-3p Score: 0.0 R03G\_15671  
Query: 1 TGAGGATTTGCATACATAC 19  
|||||||  
Sbjct: 284 ACTCCTAAACGTATGTATG 266

>miR7807a-3p Score: 0.0 R03G\_15169  
Query: 1 TGAGGATTTGCATACATAC 19  
|||||||  
Sbjct: 284 ACTCCTAAACGTATGTATG 266

>miR7807a-3p Score: 0.0 R03G\_11965  
Query: 1 TGAGGATTTGCATACATAC 19  
|||||||  
Sbjct: 284 ACTCCTAAACGTATGTATG 266

>miR7807a-3p Score: 2.5 R03G\_12385  
Query: 1 TGAGGATTTGCATACATA-C 19  
||\*||:|||||||\*|  
Sbjct: 1403 ACTACTGGACGTATGTATTG 1384

>miR7807a-3p Score: 2.5 R03G\_11608  
Query: 1 TGAGGATTTGCATACATAC 19  
|||||:|:\*|||||\*|  
Sbjct: 1971 ACTCCTGAATCTATGTA-G 1954

>miR7807a-3p Score: 2.5 R03G\_10760  
Query: 1 TGAGGATTTGCATACATAC 19  
|||\*||:|||||||\*||  
Sbjct: 665 ACTCGTAGACGTATGT-TG 648

>miR7807a-3p Score: 0.0 R03G\_10873  
Query: 1 TGAGGATTTGCATACATAC 19  
|||||||  
Sbjct: 284 ACTCCTAAACGTATGTATG 266

>miR7807a-3p Score: 0.0 R03G\_10052  
Query: 1 TGAGGATTTGCATACATAC 19  
|||||||  
Sbjct: 284 ACTCCTAAACGTATGTATG 266

>miR7807a-3p Score: 0.0 R03G\_07740

Query: 1 TGAGGATTTGCATACATAC 19  
|||||  
Sbjct: 284 ACTCCTAAACGTATGTATG 266  
>miR7807a-3p Score: 2.5 R03G\_03206  
Query: 1 TGAGGATTTGCATACATAC 19  
|:|:||||\*|||||\*|  
Sbjct: 528 ATTCTTAAAGGTATGTA-G 511  
>miR7807a-3p Score: 2.5 R03G\_03919  
Query: 1 TGAGGATTTGCATACATAC 19  
||||\*|||||\*||\*|  
Sbjct: 389 ACTCGTAAACGTATCTAAG 371  
>miR7807a-3p Score: 2.5 R03G\_03940  
Query: 1 TGAGGATTTGCATACATA-C 19  
|:||||\*|:|||||\*|  
Sbjct: 449 ATTCCTACGCGTATGTATCG 430  
>miR7807a-3p Score: 0.0 R03G\_01616  
Query: 1 TGAGGATTTGCATACATAC 19  
|||||  
Sbjct: 284 ACTCCTAAACGTATGTATG 266  
>miR7807a-3p Score: 2.0 R03G\_01786  
Query: 1 TGAGGATTTGCATACATAC 19  
|||:|||||\*||:|  
Sbjct: 323 ACTTCTAAACGTAGGTGTG 305  
>miR3440 Score: 2.5 R03G\_02539  
Query: 1 TGGATTCGATCAAGGGAAAGC 21  
|:|||||:|||||:|\*||\*  
Sbjct: 865 ATCTAAGTTAGTTCCTTATCC 845  
>miR6214 Score: 1.0 R03G\_17251  
Query: 1 TGACGACGAGAGCCACGATCA 21  
|||||\*|||||\*|||||  
Sbjct: 407 ACTGCTGCTCTCGCTGCTAGT 387  
>miR6214 Score: 2.5 R03G\_17255  
Query: 1 TGACGACGAGAGCCACGATCA 21  
||||\*|||||\*|||||\*  
Sbjct: 2654 ACTGCCGCTCTCGCTGCTAGC 2634  
>miR6214 Score: 2.0 R03G\_16919  
Query: 1 TGACGACGAGAGCCACGATCA 21  
||||\*|||||\*|||||  
Sbjct: 278 ACTGCCGCTCTCGCTGCTAGT 258  
>miR6214 Score: 2.0 R03G\_16366  
Query: 1 TGACGACGAGAGCCACGATCA 21  
||||\*|||||\*|||||  
Sbjct: 2699 ACTGCCGCTCTCGCTGCTAGT 2679  
>miR6214 Score: 2.5 R03G\_15931  
Query: 1 TGACGACGAGAGCCACGATCA 21

|||||\*:||\*\*  
Sbjct: 1313 ACTGCTGCTCTCGGTTTTACC 1293  
>miR6214 Score: 2.0 R03G\_14563  
Query: 1 TGACGACGAGAGCCACGATCA 21  
||||\*|||||\*|||||  
Sbjct: 266 ACTGCCGCTCTCGCTGCTAGT 246  
>miR6214 Score: 2.5 R03G\_14273  
Query: 1 TGACGACGAGAGCCACGA-TCA 21  
|||||\*|||||\*|||\*|  
Sbjct: 215 ACTGCTGCTCTCGGTGGCCACT 194  
>miR6214 Score: 2.5 R03G\_13458  
Query: 1 TGACGACGAGAGCCACGATCA 21  
||\*|||||\*|||||\*  
Sbjct: 407 ACCGCTGCTCTCGCTGCTAGC 387  
>miR6214 Score: 2.2 R03G\_11579  
Query: 1 TGACGACGAGAGCCACGATCA 21  
:|||||\*||||\*||\*  
Sbjct: 3530 GCTGCTGCTCTCTGTGCAAGA 3510  
>miR6214 Score: 2.0 R03G\_10543  
Query: 1 TGACGACGAGAGCCACGATCA 21  
||||\*|||||\*|||||  
Sbjct: 2156 ACTGCCGCTCTCGCTGCTAGT 2136  
>miR6214 Score: 2.0 R03G\_07735  
Query: 1 TGACGACGAGAGCCACGATCA 21  
||||\*|||||\*|||||  
Sbjct: 2603 ACTGCCGCTCTCGCTGCTAGT 2583  
>miR6214 Score: 1.8 R03G\_03008  
Query: 1 TGACGACGAGAGCCACGATCA 21  
|||||\*|||||\*:||  
Sbjct: 1064 ACTGCTGCTCCCGGTGCAGGT 1044  
>miR6214 Score: 1.0 R03G\_01294  
Query: 1 TGACGACGAGAGCCACGATCA 21  
|||||\*|||||\*|||||  
Sbjct: 1772 ACTGCTGCTCTCGCTGCTAGT 1752  
>miR5788 Score: 0.0 R03G\_15585  
Query: 1 TGGATAGTTATCAGACTCTAGTA 23  
|||||\*|||||\*|||||  
Sbjct: 2529 ACCTATCAATAGTCTGAGATCAT 2507  
>miR5788 Score: 0.0 R03G\_15250  
Query: 1 TGGATAGTTATCAGACTCTAGTA 23  
|||||\*|||||\*|||||  
Sbjct: 2529 ACCTATCAATAGTCTGAGATCAT 2507  
>miR5788 Score: 0.2 R03G\_14355  
Query: 1 TGGATAGTTATCAGACTCTAGTA 23  
|||||\*|||||\*|||||

Sbjct: 780 ACCTATCAATAGTCTGAGGTCAT 758  
>miR5788 Score: 0.5 R03G\_13867  
Query: 1 TGGATAGTTATCAGACTCTAGTA 23  
|||||\*||  
Sbjct: 2490 ACCTATCAATAGTCTGAGATAAT 2468  
>miR5788 Score: 1.5 R03G\_13920  
Query: 1 TGGATAGTTATCAGACTCTAGTA 23  
|||||\*||:|:|  
Sbjct: 2574 ACCTATCAATAGTCTAAGGTTAT 2552  
>miR5788 Score: 0.0 R03G\_13749  
Query: 1 TGGATAGTTATCAGACTCTAGTA 23  
|||||  
Sbjct: 1137 ACCTATCAATAGTCTGAGATCAT 1115  
>miR5788 Score: 0.2 R03G\_10558  
Query: 1 TGGATAGTTATCAGACTCTAGTA 23  
|||||:|  
Sbjct: 327 ACCTATCAATAGTCTGAGGTCAT 305  
>miR5788 Score: 1.5 R03G\_09965  
Query: 1 TGGATAGTTATCAGACTCTAGTA 23  
|||||\*||:|:|  
Sbjct: 2574 ACCTATCAATAGTCTAAGGTTAT 2552  
>miR5788 Score: 1.5 R03G\_05619  
Query: 1 TGGATAGTTATCAGACTCTAGTA 23  
|||||\*||:|:|  
Sbjct: 717 ACCTATCAATAGTCTAAGGTTAT 695  
>miR5788 Score: 1.5 R03G\_06427  
Query: 1 TGGATAGTTATCAGACTCTAGTA 23  
|||||\*||:|:|  
Sbjct: 2166 ACCTATCAATAGTCTAAGGTTAT 2144  
>miR5788 Score: 1.5 R03G\_06428  
Query: 1 TGGATAGTTATCAGACTCTAGTA 23  
|||||\*||:|:|  
Sbjct: 1668 ACCTATCAATAGTCTAAGGTTAT 1646  
>miR5788 Score: 1.5 R03G\_06442  
Query: 1 TGGATAGTTATCAGACTCTAGTA 23  
|||||\*||:|:|  
Sbjct: 3231 ACCTATCAATAGTCTAAGGTTAT 3209  
>miR5788 Score: 0.2 R03G\_05272  
Query: 1 TGGATAGTTATCAGACTCTAGTA 23  
|||||:|  
Sbjct: 2574 ACCTATCAATAGTCTGAGGTCAT 2552  
>miR5788 Score: 1.5 R03G\_02691  
Query: 1 TGGATAGTTATCAGACTCTAGTA 23  
|||||\*||:|:|  
Sbjct: 6063 ACCTATCAATAGTCTAAGGTTAT 6041

>miR5788 Score: 1.5 R03G\_02959  
Query: 1 TGGATAGTTATCAGACTCTAGTA 23  
|||||\*||:|:|  
Sbjct: 2574 ACCTATCAATAGTCTAAGGTTAT 2552

>miR5788 Score: 1.5 R03G\_03547  
Query: 1 TGGATAGTTATCAGACTCTAGTA 23  
|||||\*||:|:|  
Sbjct: 2574 ACCTATCAATAGTCTAAGGTTAT 2552

>miR5788 Score: 0.2 R03G\_04114  
Query: 1 TGGATAGTTATCAGACTCTAGTA 23  
|||||:||||  
Sbjct: 2574 ACCTATCAATAGTCTGAGGTCAT 2552

>miR5788 Score: 0.0 R03G\_00306  
Query: 1 TGGATAGTTATCAGACTCTAGTA 23  
|||||  
Sbjct: 1023 ACCTATCAATAGTCTGAGATCAT 1001

>miR5788 Score: 0.0 R03G\_01613  
Query: 1 TGGATAGTTATCAGACTCTAGTA 23  
|||||  
Sbjct: 825 ACCTATCAATAGTCTGAGATCAT 803

>miR5788 Score: 1.5 R03G\_02221  
Query: 1 TGGATAGTTATCAGACTCTAGTA 23  
|||||\*||:|:|  
Sbjct: 2496 ACCTATCAATAGTCTAAGGTTAT 2474

>miR5788 Score: 0.2 R03G\_17371  
Query: 1 TGGATAGTTATCAGACTCTAGTA 23  
|||||:||||  
Sbjct: 2529 ACCTATCAATAGTCTGAGGTCAT 2507

>miR5788 Score: 1.5 R03G\_17326  
Query: 1 TGGATAGTTATCAGACTCTAGTA 23  
|||||\*||:|:|  
Sbjct: 2406 ACCTATCAATAGTCTAAGGTTAT 2384

>miR5208d Score: 1.5 R03G\_15573  
Query: 1 TTTAGTCATAGTTTGTAGGCAA 22  
|\*:|||||  
Sbjct: 1489 ATGTCAGTATCAAACATCCGTT 1468

>miR5208d Score: 1.5 R03G\_13849  
Query: 1 TTTAGTCATAGTTTGTAGGCAA 22  
|\*:|||||  
Sbjct: 1489 ATGTCAGTATCAAACATCCGTT 1468

>miR5208d Score: 2.5 R03G\_12344  
Query: 1 TTTAGTCATAGTTTGTAGGCAA 22  
||:|\*|||:|\*||  
Sbjct: 2523 AAGTGAGTATCAAACATTTCTT 2502

>miR5208d Score: 1.5 R03G\_10420

Query: 1 TTTAGTCATAGTTTGTAGGCAA 22  
|\*:||||||||||||||||||  
Sbjct: 1489 ATGTCAGTATCAAACATCCGTT 1468  
>miR5208d Score: 1.5 R03G\_10991  
Query: 1 TTTAGTCATAGTTTGTAGGCAA 22  
|\*:||||||||||||||||||  
Sbjct: 1489 ATGTCAGTATCAAACATCCGTT 1468  
>miR5208d Score: 1.0 R03G\_05865  
Query: 1 TTTAGTCATAGTTTGTAGGCAA 22  
|\*||||||||||||||||||  
Sbjct: 1489 ATATCAGTATCAAACATCCGTT 1468  
>miR5208d Score: 1.0 R03G\_06502  
Query: 1 TTTAGTCATAGTTTGTAGGCAA 22  
|\*||||||||||||||||||  
Sbjct: 1489 ATATCAGTATCAAACATCCGTT 1468  
>miR5208d Score: 1.0 R03G\_04662  
Query: 1 TTTAGTCATAGTTTGTAGGCAA 22  
|\*||||||||||||||||||  
Sbjct: 1231 ATATCAGTATCAAACATCCGTT 1210  
>miR5208d Score: 1.5 R03G\_02708  
Query: 1 TTTAGTCATAGTTTGTAGGCAA 22  
|\*:||||||||||||||||||  
Sbjct: 1222 ATGTCAGTATCAAACATCCGTT 1201  
>miR5208d Score: 1.5 R03G\_02966  
Query: 1 TTTAGTCATAGTTTGTAGGCAA 22  
|\*:||||||||||||||||||  
Sbjct: 760 ATGTCAGTATCAAACATCCGTT 739  
>miR5208d Score: 1.5 R03G\_03749  
Query: 1 TTTAGTCATAGTTTGTAGGCAA 22  
|\*:||||||||||||||||||  
Sbjct: 1489 ATGTCAGTATCAAACATCCGTT 1468  
>miR5208d Score: 2.0 R03G\_01056  
Query: 1 TTTAGTCATAGTTTGTAGGCAA 22  
\*\*||||||||||||||||||\*  
Sbjct: 1384 TCATCAGTATCAAACATCCGTC 1363  
>miR5208d Score: 1.0 R03G\_01733  
Query: 1 TTTAGTCATAGTTTGTAGGCAA 22  
|\*||||||||||||||||||  
Sbjct: 1413 ATATCAGTATCAAACATCCGTT 1392  
>miR5208d Score: 1.5 R03G\_01944  
Query: 1 TTTAGTCATAGTTTGTAGGCAA 22  
|\*:||||||||||||||||||  
Sbjct: 1489 ATGTCAGTATCAAACATCCGTT 1468  
>miR5208d Score: 1.5 R03G\_17446  
Query: 1 TTTAGTCATAGTTTGTAGGCAA 22

```
|*:|||||
Sbjct: 1489 ATGTCAGTATCAAACATCCGTT 1468
>miR5208d Score: 1.5 R03G_17287
Query: 1 TTTAGTCATAGTTTGTAGGCAA 22
|*:|||||
Sbjct: 1489 ATGTCAGTATCAAACATCCGTT 1468
>miR6209 Score: 1.0 R03G_16430
Query: 1 TGAGCATCAGAAGCTGTGCG 20
|||||*|||||
Sbjct: 212 ACTCGTAGTCTTAGACACGC 193
>miR6209 Score: 0.0 R03G_16144
Query: 1 TGAGCATCAGAAGCTGTGCG 20
|||||
Sbjct: 248 ACTCGTAGTCTTCGACACGC 229
>miR6209 Score: 0.0 R03G_14972
Query: 1 TGAGCATCAGAAGCTGTGCG 20
|||||
Sbjct: 179 ACTCGTAGTCTTCGACACGC 160
>miR6209 Score: 0.5 R03G_15151
Query: 1 TGAGCATCAGAAGCTGTGCG 20
|||||:|||||
Sbjct: 269 ACTCGTAGTCTTTGACACGC 250
>miR6209 Score: 0.0 R03G_13295
Query: 1 TGAGCATCAGAAGCTGTGCG 20
|||||
Sbjct: 179 ACTCGTAGTCTTCGACACGC 160
>miR6209 Score: 0.0 R03G_13702
Query: 1 TGAGCATCAGAAGCTGTGCG 20
|||||
Sbjct: 179 ACTCGTAGTCTTCGACACGC 160
>miR6209 Score: 1.0 R03G_13754
Query: 1 TGAGCATCAGAAGCTGTGCG 20
|||||*|||||
Sbjct: 248 ACTCGTAGTCTTAGACACGC 229
>miR6209 Score: 0.0 R03G_13860
Query: 1 TGAGCATCAGAAGCTGTGCG 20
|||||
Sbjct: 248 ACTCGTAGTCTTCGACACGC 229
>miR6209 Score: 0.0 R03G_12665
Query: 1 TGAGCATCAGAAGCTGTGCG 20
|||||
Sbjct: 227 ACTCGTAGTCTTCGACACGC 208
>miR6209 Score: 1.0 R03G_12672
Query: 1 TGAGCATCAGAAGCTGTGCG 20
|||||*|||||
```



Sbjct: 248 ACTCGTAGTCTTAGACACGC 229  
>miR6209 Score: 0.0 R03G\_13000  
Query: 1 TGAGCATCAGAAGCTGTGCG 20  
|||||

Sbjct: 179 ACTCGTAGTCTTCGACACGC 160  
>miR6209 Score: 1.0 R03G\_13138  
Query: 1 TGAGCATCAGAAGCTGTGCG 20  
|||||\*|||||

Sbjct: 179 ACTCGTAGTCTTAGACACGC 160  
>miR6209 Score: 1.0 R03G\_12004  
Query: 1 TGAGCATCAGAAGCTGTGCG 20  
|||||\*|||||

Sbjct: 248 ACTCGTAGTCTTAGACACGC 229  
>miR6209 Score: 1.0 R03G\_12173  
Query: 1 TGAGCATCAGAAGCTGTGCG 20  
|||||\*|||||

Sbjct: 248 ACTCGTAGTCTTAGACACGC 229  
>miR6209 Score: 2.5 R03G\_12181  
Query: 1 TGAGCATCAGAAGCTGTGCG 20  
\*:|||||\*|||\*|

Sbjct: 722 TTTCGTAGTCTTCAACAC-C 704  
>miR6209 Score: 2.0 R03G\_11253  
Query: 1 TGAGCATCAGAAGCTGTGCG 20  
|||||\*|||\*|

Sbjct: 794 ACTCGTAGGTTTCGACAC-C 776  
>miR6209 Score: 2.5 R03G\_10340  
Query: 1 TGAGCATCAGAAGCTGTGCG 20  
|:||||\*|||||\*\*

Sbjct: 467 ATTCGTTGTCTTCGACACAA 448  
>miR6209 Score: 0.0 R03G\_09598  
Query: 1 TGAGCATCAGAAGCTGTGCG 20  
|||||

Sbjct: 179 ACTCGTAGTCTTCGACACGC 160  
>miR6209 Score: 0.5 R03G\_09618  
Query: 1 TGAGCATCAGAAGCTGTGCG 20  
|||||\*|||||

Sbjct: 233 ACTCGTAGTCTTCGACACAC 214  
>miR6209 Score: 1.0 R03G\_09950  
Query: 1 TGAGCATCAGAAGCTGTGCG 20  
|||||\*|||||

Sbjct: 248 ACTCGTAGTCTTAGACACGC 229  
>miR6209 Score: 0.5 R03G\_10034  
Query: 1 TGAGCATCAGAAGCTGTGCG 20  
|||||:|||||

Sbjct: 233 ACTCGTAGTCTTTGACACGC 214

>miR6209 Score: 0.5 R03G\_10051  
Query: 1 TGAGCATCAGAAGCTGTGCG 20  
|||||:|||||  
Sbjct: 233 ACTCGTAGTCTTTGACACGC 214

>miR6209 Score: 1.0 R03G\_10231  
Query: 1 TGAGCATCAGAAGCTGTGCG 20  
|||||\*|||||  
Sbjct: 248 ACTCGTAGTCTTAGACACGC 229

>miR6209 Score: 0.0 R03G\_06740  
Query: 1 TGAGCATCAGAAGCTGTGCG 20  
|||||  
Sbjct: 179 ACTCGTAGTCTTCGACACGC 160

>miR6209 Score: 2.0 R03G\_07076  
Query: 1 TGAGCATCAGAAGCTGTGCG 20  
|||||\*|\*|  
Sbjct: 485 ACTCGTAGGTTTCGACAC-C 467

>miR6209 Score: 0.0 R03G\_07111  
Query: 1 TGAGCATCAGAAGCTGTGCG 20  
|||||  
Sbjct: 248 ACTCGTAGTCTTCGACACGC 229

>miR6209 Score: 1.0 R03G\_07673  
Query: 1 TGAGCATCAGAAGCTGTGCG 20  
||||\*|||||  
Sbjct: 248 ACTCGCAGTCTTCGACACGC 229

>miR6209 Score: 0.0 R03G\_07716  
Query: 1 TGAGCATCAGAAGCTGTGCG 20  
|||||  
Sbjct: 233 ACTCGTAGTCTTCGACACGC 214

>miR6209 Score: 0.5 R03G\_07719  
Query: 1 TGAGCATCAGAAGCTGTGCG 20  
|||||\*|  
Sbjct: 176 ACTCGTAGTCTTCGACACAC 157

>miR6209 Score: 1.0 R03G\_07859  
Query: 1 TGAGCATCAGAAGCTGTGCG 20  
|||||\*|||||  
Sbjct: 143 ACTCGTAGTCTTAGACACGC 124

>miR6209 Score: 1.0 R03G\_05932  
Query: 1 TGAGCATCAGAAGCTGTGCG 20  
|||||\*|||||  
Sbjct: 179 ACTCGTAGTCTTAGACACGC 160

>miR6209 Score: 0.0 R03G\_05934  
Query: 1 TGAGCATCAGAAGCTGTGCG 20  
|||||  
Sbjct: 179 ACTCGTAGTCTTCGACACGC 160

>miR6209 Score: 1.0 R03G\_06435

Query: 1 TGAGCATCAGAAGCTGTGCG 20  
|||||||\*|||||||  
Sbjct: 248 ACTCGTAGTCTTAGACACGC 229  
>miR6209 Score: 0.0 R03G\_06719  
Query: 1 TGAGCATCAGAAGCTGTGCG 20  
|||||||\*|||||||  
Sbjct: 179 ACTCGTAGTCTTCGACACGC 160  
>miR6209 Score: 0.0 R03G\_04671  
Query: 1 TGAGCATCAGAAGCTGTGCG 20  
|||||||\*|||||||  
Sbjct: 248 ACTCGTAGTCTTCGACACGC 229  
>miR6209 Score: 2.5 R03G\_05007  
Query: 1 TGAGCATCAGAAGCTGTGCG 20  
:|||\*|||||||\*:||  
Sbjct: 173 GCTCTTAGTCTTCGAC-TGC 155  
>miR6209 Score: 1.0 R03G\_05351  
Query: 1 TGAGCATCAGAAGCTGTGCG 20  
|||||||\*|||||||  
Sbjct: 233 ACTCGTAGTCTTAGACACGC 214  
>miR6209 Score: 0.0 R03G\_02701  
Query: 1 TGAGCATCAGAAGCTGTGCG 20  
|||||||\*|||||||  
Sbjct: 212 ACTCGTAGTCTTCGACACGC 193  
>miR6209 Score: 2.5 R03G\_02730  
Query: 1 TGAGCATCAGAAGCTGTGCG 20  
|||||||\*|||||||\*||  
Sbjct: 1163 ACTCGTAATCTTCGAC-CAC 1145  
>miR6209 Score: 1.8 R03G\_02745  
Query: 1 TGAGCATCAGAAGCTGTGCG 20  
|\*||||:|||||||:||  
Sbjct: 614 AATCGTGGTCTTCGACATGC 595  
>miR6209 Score: 0.5 R03G\_03561  
Query: 1 TGAGCATCAGAAGCTGTGCG 20  
|||||||\*|||||||  
Sbjct: 269 ACTCGTAGTCTTTGACACGC 250  
>miR6209 Score: 0.0 R03G\_03989  
Query: 1 TGAGCATCAGAAGCTGTGCG 20  
|||||||\*|||||||  
Sbjct: 179 ACTCGTAGTCTTCGACACGC 160  
>miR6209 Score: 2.0 R03G\_04128  
Query: 1 TGAGCATCAGAAGCTGTGCG 20  
|||||||\*||\*|||||||  
Sbjct: 248 ACTCGTAGTCCTCAACACGC 229  
>miR6209 Score: 0.0 R03G\_00252  
Query: 1 TGAGCATCAGAAGCTGTGCG 20

```
|||||
Sbjct: 302 ACTCGTAGTCTTCGACACGC 283
>miR6209 Score: 2.5 R03G_00502
Query: 1 TGAGCATCAGAAGCTGTGCG 20
|||||*||*|||||*||
Sbjct: 529 ACTCGTCGTGTTTCGACA-GC 511
>miR6209 Score: 0.0 R03G_01310
Query: 1 TGAGCATCAGAAGCTGTGCG 20
|||||
Sbjct: 179 ACTCGTAGTCTTCGACACGC 160
>miR6209 Score: 0.0 R03G_01738
Query: 1 TGAGCATCAGAAGCTGTGCG 20
|||||
Sbjct: 179 ACTCGTAGTCTTCGACACGC 160
>miR6209 Score: 1.0 R03G_01938
Query: 1 TGAGCATCAGAAGCTGTGCG 20
|||||*|||||
Sbjct: 248 ACTCGTAGTCTTAGACACGC 229
>miR6209 Score: 0.0 R03G_17468
Query: 1 TGAGCATCAGAAGCTGTGCG 20
|||||
Sbjct: 179 ACTCGTAGTCTTCGACACGC 160
>miR6209 Score: 0.5 R03G_17359
Query: 1 TGAGCATCAGAAGCTGTGCG 20
|||||:|||||
Sbjct: 269 ACTCGTAGTCTTTGACACGC 250
>miR6209 Score: 1.0 R03G_17333
Query: 1 TGAGCATCAGAAGCTGTGCG 20
|||||*|||||
Sbjct: 248 ACTCGTAGTCTTAGACACGC 229
>miR6209 Score: 0.0 R03G_17152
Query: 1 TGAGCATCAGAAGCTGTGCG 20
|||||
Sbjct: 227 ACTCGTAGTCTTCGACACGC 208
>miR1120c-5p Score: 2.5 R03G_02870
Query: 1 TAATATAAAATGCTTTGTTGAC 22
*||||*|||||**|
Sbjct: 688 CTTATACTTTACGAAACAAACG 667
>miR4387a Score: 2.5 R03G_01478
Query: 1 AACAAGCCGGTGTGGGTGACACT 23
*|||||*||*||*|
Sbjct: 2382 GTGTTCGGCCACAGCCACTTTTA 2360
>miR5718 Score: 1.5 R03G_16818
Query: 1 TCAGAACCAAGACCAGCCAAG 23
||||*|||||*||
```

Sbjct: 2258 AGTCCTGGTTCTGGTCTCGGCTC 2236  
>miR5718 Score: 2.0 R03G\_16818  
Query: 1 TCAGAACCAAGACCAGAGCCAAG 23  
:||||\*|||||||:|\*|||

Sbjct: 2228 GGTCTCGTTCTGGTCTTGATTC 2206  
>miR5718 Score: 1.8 R03G\_16800  
Query: 1 TCAGAACCAAGACCAGAGCCAAG 23  
:||:\*|||||||

Sbjct: 2486 GGTTCTGGTTCTGGTCTCGGTTC 2464  
>miR5718 Score: 2.2 R03G\_16171  
Query: 1 TCAGAACCAAGACCAGAGCCAAG 23  
|||||||\*|||:\*\*|||

Sbjct: 7028 AGTCTTGGTTCTGCTCTT-CTTC 7007  
>miR5718 Score: 1.8 R03G\_15265  
Query: 1 TCAGAACCAAGACCAGAGCCAAG 23  
:||:\*|||||||

Sbjct: 2486 GGTTCTGGTTCTGGTCTCGGTTC 2464  
>miR5718 Score: 1.8 R03G\_15267  
Query: 1 TCAGAACCAAGACCAGAGCCAAG 23  
:||:\*|||||||

Sbjct: 248 GGTCTGGTTCTGGTCTCGGTTC 226  
>miR5718 Score: 0.0 R03G\_15268  
Query: 1 TCAGAACCAAGACCAGAGCCAAG 23  
|||||||

Sbjct: 2486 AGTCTTGGTTCTGGTCTCGGTTC 2464  
>miR5718 Score: 1.8 R03G\_14350  
Query: 1 TCAGAACCAAGACCAGAGCCAAG 23  
:|||||||\*|||||||\*||

Sbjct: 2381 GGTCTTGGTCCTGGTCTCGGCTC 2359  
>miR5718 Score: 0.2 R03G\_14350  
Query: 1 TCAGAACCAAGACCAGAGCCAAG 23  
:|||||||

Sbjct: 2351 GGTCTTGGTTCTGGTCTCGGTTC 2329  
>miR5718 Score: 1.8 R03G\_14352  
Query: 1 TCAGAACCAAGACCAGAGCCAAG 23  
:|||||||\*|||||||\*||

Sbjct: 2519 GGTCTTGGTCCTGGTCTCGGCTC 2497  
>miR5718 Score: 0.2 R03G\_14352  
Query: 1 TCAGAACCAAGACCAGAGCCAAG 23  
:|||||||

Sbjct: 2489 GGTCTTGGTTCTGGTCTCGGTTC 2467  
>miR5718 Score: 1.8 R03G\_14777  
Query: 1 TCAGAACCAAGACCAGAGCCAAG 23  
:||:\*|||||||

Sbjct: 185 GGTCTGGTTCTGGTCTCGGTTC 163



Query: 1 TGGTCTGTGATGGATGCGTT 20  
|||\*\*|||||||\*  
Sbjct: 154 ACCCAACACTACCTACGCAC 135  
>miR6182 Score: 2.5 R03G\_00234  
Query: 1 TGGTCTGTGATGGATGCGTT 20  
|||||\*|||||||:|\*\*|  
Sbjct: 998 ACCAGAACTACCTATGATA 979  
>miR8179 Score: 0.0 R03G\_17263  
Query: 1 TGATCTGCATTCACTTGATCGT 22  
|||||||  
Sbjct: 1106 ACTAGACGTAAGTGAAGTAGCA 1085  
>miR8179 Score: 0.0 R03G\_15868  
Query: 1 TGATCTGCATTCACTTGATCGT 22  
|||||||  
Sbjct: 935 ACTAGACGTAAGTGAAGTAGCA 914  
>miR8179 Score: 2.5 R03G\_14486  
Query: 1 TGATCTGCATTCACTTGATCGT 22  
\*|\*|||||||\*|\*|  
Sbjct: 197 CCAAGACGTAAGTGAAC-AGGA 177  
>miR8179 Score: 0.0 R03G\_14771  
Query: 1 TGATCTGCATTCACTTGATCGT 22  
|||||||  
Sbjct: 1049 ACTAGACGTAAGTGAAGTAGCA 1028  
>miR8179 Score: 2.0 R03G\_12808  
Query: 1 TGATCTGCATTCACTTGATCGT 22  
|\*|||||||\*|\*|  
Sbjct: 815 AATAGACGTAAGTGAAC-AGAA 795  
>miR8179 Score: 2.2 R03G\_13234  
Query: 1 TGATCTGCATTCACTTGATCGT 22  
:||||||\*||||||\*|:|  
Sbjct: 293 GCTAGACGAAAGTGAAC-GGTA 273  
>miR8179 Score: 0.0 R03G\_13279  
Query: 1 TGATCTGCATTCACTTGATCGT 22  
|||||||  
Sbjct: 1949 ACTAGACGTAAGTGAAGTAGCA 1928  
>miR8179 Score: 2.5 R03G\_11794  
Query: 1 TGATCTGCATTCACTTGATC-GT 22  
||||||\*||:||||||\*|\*||  
Sbjct: 68 ACTAGACTTAGGTGAAGTTGACA 46  
>miR8179 Score: 0.0 R03G\_10786  
Query: 1 TGATCTGCATTCACTTGATCGT 22  
|||||||  
Sbjct: 1097 ACTAGACGTAAGTGAAGTAGCA 1076  
>miR8179 Score: 0.0 R03G\_09943  
Query: 1 TGATCTGCATTCACTTGATCGT 22





Sbjct: 223 GTACCTACTCCTCCTACGG 205  
>miR847-5p Score: 1.8 R03G\_13827  
Query: 1 TATTGATGAGGAGGATGGA 19  
\*||\*|||||||:|  
Sbjct: 1926 TTACCTACTCCTCCTACTT 1908  
>miR847-5p Score: 2.5 R03G\_12961  
Query: 1 TATTGATGAGGAGGATGGA 19  
\*\*\*|||||||  
Sbjct: 96 TCTACTACTCCTCCTACCT 78  
>miR847-5p Score: 2.0 R03G\_11915  
Query: 1 TATTGATGAGGAGGATGGA 19  
\*||||:|||||:|\*|  
Sbjct: 416 TTAAGTCTCCTCCTGC-T 399  
>miR847-5p Score: 2.5 R03G\_11952  
Query: 1 TATTGATGAGGAGGATGGA 19  
\*\*\*|||||||  
Sbjct: 141 TCTACTACTCCTCCTACCT 123  
>miR847-5p Score: 2.5 R03G\_10744  
Query: 1 TATTGATGAGGAGGATGGA 19  
|\*||||:||||:||||\*|  
Sbjct: 1911 ACAACTGCTCCTTCTAC-T 1894  
>miR847-5p Score: 2.5 R03G\_10745  
Query: 1 TATTGATGAGGAGGATGGA 19  
|\*||||:||||:||||\*|  
Sbjct: 879 ACAACTGCTCCTTCTAC-T 862  
>miR847-5p Score: 2.5 R03G\_10839  
Query: 1 TATTGATGAGGAGGATGGA 19  
:\*:|||||:|||||:|  
Sbjct: 615 GGGACTACTTCTCCTACTT 597  
>miR847-5p Score: 2.2 R03G\_11040  
Query: 1 TATTGATGAGGAGGATGGA 19  
|\*|||||:||:||||:|  
Sbjct: 99 ACAACTACTTCTTCTACTT 81  
>miR847-5p Score: 2.5 R03G\_09242  
Query: 1 TATTGATGAGGAGGATGGA 19  
|||\*|||||||:|\*|  
Sbjct: 526 ATACCTACTCCTCCTGT-T 509  
>miR847-5p Score: 1.8 R03G\_08083  
Query: 1 TATTGATGAGGAGGATGGA 19  
\*||||:|||||:|:|  
Sbjct: 398 TTAAGTCTCCTCCTGCTT 380  
>miR847-5p Score: 2.5 R03G\_08484  
Query: 1 TATTGATGAGGAGGATGGA 19  
|||||\*|||||||\*|\*|  
Sbjct: 152 ATAACCTCCTCCTCCTCC-T 135

>miR847-5p Score: 2.5 R03G\_08785  
Query: 1 TATTGATGAGGAGGATGGA 19  
|||||\*|||||||\*|\*|  
Sbjct: 284 ATAACCTCCTCCTCCTCC-T 267

>miR847-5p Score: 2.5 R03G\_07862  
Query: 1 TATTGATGAGGAGGATGGA 19  
|\*||||:||||:||||\*|  
Sbjct: 2022 ACAACTGCTCCTTCTAC-T 2005

>miR847-5p Score: 2.5 R03G\_06497  
Query: 1 TATTGATGAGGAGGATGGA 19  
\*||||:||||:||:|\*|  
Sbjct: 23 TTAACCTGCTCCTTCTGCGT 5

>miR847-5p Score: 2.5 R03G\_04817  
Query: 1 TATTGATGAGGAGGATGGA 19  
\*\*|||||:|||||||\*|  
Sbjct: 1335 TCAACTACTTCTCCTACCA 1317

>miR847-5p Score: 2.5 R03G\_05205  
Query: 1 TATTGATGAGGAGGATGGA 19  
||\*|||||||:|\*|  
Sbjct: 382 ATACCTACTCCTCCTGT-T 365

>miR847-5p Score: 2.5 R03G\_02989  
Query: 1 TATTGATGAGGAGGATGGA 19  
||||\*|||||||\*|\*|  
Sbjct: 470 ATAACAACCTCCTCCTCC-T 453

>miR847-5p Score: 0.0 R03G\_03516  
Query: 1 TATTGATGAGGAGGATGGA 19  
|||||||  
Sbjct: 663 ATAACTACTCCTCCTACCT 645

>miR847-5p Score: 2.5 R03G\_00683  
Query: 1 TATTGATGAGGAGGATGGA 19  
\*\*\*|||||||  
Sbjct: 96 TCTACTACTCCTCCTACCT 78

>miR847-5p Score: 2.5 R03G\_01278  
Query: 1 TATTGATGAGGAGGATGG-A 19  
||:|||||\*|:||||||\*|  
Sbjct: 211 ATGACTACTGTTCCCTACCGT 192

>miR847-5p Score: 2.5 R03G\_01830  
Query: 1 TATTGATGAGGAGGATGGA 19  
|||:|\*|:|||||||\*|  
Sbjct: 136 ATAGCAATTCCTCCTACCC 118

>miR847-5p Score: 2.5 R03G\_01875  
Query: 1 TATTGATGAGGAGGATGGA 19  
\*|||||||:||||\*|\*|  
Sbjct: 1136 TTAACCTACTTCTCCAAC-T 1119

>miR847-5p Score: 2.0 R03G\_02104

Query: 1 TATTGATGAGGAGGATGG-A 19  
|||||||:|:|||||||:|\*|  
Sbjct: 737 ATAACTATTTCTCCTATCGT 718  
>miR9559-5p Score: 2.0 R03G\_17021  
Query: 1 TTTGATTTTGGTTCATTTTG 20  
\*||||||:|:|||||||:|||  
Sbjct: 595 CAACTAGAGCCAAGTAGAAC 576  
>miR9559-5p Score: 1.5 R03G\_16288  
Query: 1 TTTGATTTTGGTTCATTTTG 20  
\*|||||||:|:|||||||  
Sbjct: 239 TAACTAAAATTAAGTAAAAC 220  
>miR9559-5p Score: 2.5 R03G\_15821  
Query: 1 TTTGATTTTGGTTCATTT-TG 20  
:|||||||:|\*||\*|\*|:  
Sbjct: 1364 GAACTAAAATCAAGCAAATAT 1344  
>miR9559-5p Score: 2.5 R03G\_15310  
Query: 1 TTTGATTTTGGTTCATTTTG 20  
|||:\*|||||||\*|||||  
Sbjct: 239 AAATAAAAACCAAATAAAAAC 220  
>miR9559-5p Score: 2.5 R03G\_14948  
Query: 1 TTTGATTTTGGTTCATTTTG 20  
||:|||||||\*|||  
Sbjct: 83 AAGCTAAAACCAAAGAAAAC 64  
>miR9559-5p Score: 2.0 R03G\_14378  
Query: 1 TTTGATTTTGGTTCATTTTG 20  
|||:|||:|:|:|||||||  
Sbjct: 3053 AAATTAAGACTAGGTAAAAC 3034  
>miR9559-5p Score: 2.5 R03G\_13883  
Query: 1 TTTGATTTTGGTTCATTT-TG 20  
\*|||||||:|:|||||||\*||  
Sbjct: 1622 TAACTAAAGTTAAGTAAAGAC 1602  
>miR9559-5p Score: 2.0 R03G\_14347  
Query: 1 TTTGATTTTGGTTCATTTTG 20  
\*||||||:|:|||||||:|||  
Sbjct: 595 CAACTAGAGCCAAGTAGAAC 576  
>miR9559-5p Score: 2.0 R03G\_13722  
Query: 1 TTTGATTTTGGTTCATTTTG 20  
\*||||||:|:|||||||:|||  
Sbjct: 592 CAACTAGAGCCAAGTAGAAC 573  
>miR9559-5p Score: 2.5 R03G\_13839  
Query: 1 TTTGATTTTGGTTCATTTTG 20  
\*|:|||||||:||\*|||||  
Sbjct: 168 CAGCTAAAACCTAAGCAAAAAC 149  
>miR9559-5p Score: 2.0 R03G\_12677  
Query: 1 TTTGATTTTGGTTCATTTTG 20

\*|||||:|:||||||:|||  
Sbjct: 595 CAACTAGAGCCAAGTAGAAC 576  
>miR9559-5p Score: 2.0 R03G\_11377  
Query: 1 TTTGATTTTGGTTCATTTTG 20  
|||||||\*|||||\*|\*  
Sbjct: 2405 AAATAAAACGAAGTAACAG 2386  
>miR9559-5p Score: 2.5 R03G\_10354  
Query: 1 TTTGATTTTGGTTCATTTTG 20  
|||:\*|||||\*|||||||  
Sbjct: 398 AAATAAAAACCTAGTAAAAC 379  
>miR9559-5p Score: 2.0 R03G\_10410  
Query: 1 TTTGATTTTGGTTCATTTTG 20  
|\*|:|||||||\*||  
Sbjct: 434 ATATTA AACCAAGTAACAC 415  
>miR9559-5p Score: 2.5 R03G\_10487  
Query: 1 TTTGATTTTGGTTCATTTTG 20  
:|||\*|||||||:|\*:  
Sbjct: 248 GAACGAAAACCAAGTAGATT 229  
>miR9559-5p Score: 2.5 R03G\_10638  
Query: 1 TTTGATTTTGGTTCATTTTG 20  
|||||\*|:||||||:|\*||  
Sbjct: 152 AAATAATGACCAAGTGA-AC 134  
>miR9559-5p Score: 2.5 R03G\_09382  
Query: 1 TTTGATTTTGGTTCATTTTG 20  
|||:||:||||:||||\*::  
Sbjct: 20 AAATTAGAACCGAGTAA-GT 2  
>miR9559-5p Score: 2.5 R03G\_09425  
Query: 1 TTTGATTTTGGTTCATTTTG 20  
|||||:||||||\*||\*|||  
Sbjct: 1311 AAATAAGAAACCAACTACAAC 1292  
>miR9559-5p Score: 2.2 R03G\_09435  
Query: 1 TTTGATTTTGGTTCATTTTG 20  
:|||||:|:|||||:||\*  
Sbjct: 641 GAACTAAGATCAAGTAGAAG 622  
>miR9559-5p Score: 2.2 R03G\_09506  
Query: 1 TTTGATTTTGGTTCATTTTG 20  
|||||:|||\*||:|||||:  
Sbjct: 733 AAATAAGAAAGCAGGTAAAAT 714  
>miR9559-5p Score: 2.0 R03G\_09547  
Query: 1 TTTGATTTTGGTTCATTTTG 20  
\*|||||:|:||||||:|||  
Sbjct: 595 CAACTAGAGCCAAGTAGAAC 576  
>miR9559-5p Score: 2.5 R03G\_09738  
Query: 1 TTTGATTTTGGTTCATTTTG 20  
|||||||\*|:||||||\*|

Sbjct: 95 AACTAAAGACAAGTAA-CC 77  
>miR9559-5p Score: 2.2 R03G\_09845  
Query: 1 TTTGATTTTGGTTCATTTTG 20  
\*|||||\*|\*|

Sbjct: 1265 CAACTAAAACCAAGTTA-GC 1247  
>miR9559-5p Score: 2.2 R03G\_08365  
Query: 1 TTTGATTTTGGTTCATTTTG 20  
\*:|||||:|

Sbjct: 491 TGACTAAAATTAAGTAAAGC 472  
>miR9559-5p Score: 2.5 R03G\_09064  
Query: 1 TTTGATTTTGGTTCATTTTG 20  
:|||\*||:|||||\*|

Sbjct: 47 GAACAAAGACCAAGTAAATT 28  
>miR9559-5p Score: 2.5 R03G\_07376  
Query: 1 TTTGATTTTGGTTCATTTTG 20  
|:|:|:|:|:|:|\*|

Sbjct: 1580 AGATTAAGACCAAGTAGAAG 1561  
>miR9559-5p Score: 2.5 R03G\_07643  
Query: 1 TTTGATTTTGGTTCATTTTG 20  
|:|||||\*|\*|

Sbjct: 272 AGACTAAAACCAAGAAGATC 253  
>miR9559-5p Score: 2.5 R03G\_05566  
Query: 1 TTTGATTTTGGTTCATTTTG 20  
||||\*|||:||\*|||

Sbjct: 89 AACTTAAACTAAGAAAAAC 70  
>miR9559-5p Score: 2.2 R03G\_05706  
Query: 1 TTTGATTTTGGTTCATTTTG 20  
|||||:|:|:|:|:

Sbjct: 822 AACTAAAGTTAGGTAAAAT 803  
>miR9559-5p Score: 2.5 R03G\_05788  
Query: 1 TTTGATTTTGGTTCATTTTG 20  
||||\*||:|:|||||\*|

Sbjct: 53 AAACAAAGATCAAGTAAAAA 34  
>miR9559-5p Score: 2.2 R03G\_06401  
Query: 1 TTTGATTTTGGTTCATTTTG 20  
:|||||\*|\*|

Sbjct: 187 GAACTAAAAGCTAGTAAAAC 168  
>miR9559-5p Score: 2.0 R03G\_06425  
Query: 1 TTTGATTTTGGTTCATTTTG 20  
\*||||:|:|||||:|

Sbjct: 595 CAACTAGAGCCAAGTAGAAC 576  
>miR9559-5p Score: 1.5 R03G\_04779  
Query: 1 TTTGATTTTGGTTCATTTTG 20  
|||||:|\*|

Sbjct: 1094 AACTAAAATAAGTAAAAC 1075



Query: 1 TTTGATTTTGGTTCATTTTG 20  
:||\*|||||||\*  
Sbjct: 745 GAAGTAAACCAAGTAAAGA 726  
>miR9559-5p Score: 2.0 R03G\_03778  
Query: 1 TTTGATTTTGGTTCATTTTG 20  
\*|||||:|:|||||:|||  
Sbjct: 595 CAACTAGAGCCAAGTAGAAC 576  
>miR9559-5p Score: 2.0 R03G\_03878  
Query: 1 TTTGATTTTGGTTCATTTTG 20  
|||||||:|\*|:|||  
Sbjct: 866 AACTAAAACCGAGCAGAAC 847  
>miR9559-5p Score: 2.5 R03G\_00162  
Query: 1 TTTGATTTTGGTTCATTTTG 20  
\*|||||:||||\*|||:|||  
Sbjct: 632 TAACTAAGACCATGTAGAAC 613  
>miR9559-5p Score: 2.2 R03G\_00170  
Query: 1 TTTGATTTTGGTTCATTTTG 20  
:|||||:|:|||||:|\*:  
Sbjct: 4763 GAACTAGAATCAAGTAAGTT 4744  
>miR9559-5p Score: 2.2 R03G\_00366  
Query: 1 TTTGATTTTGGTTCATTTTG 20  
:||||\*||||:|:|||||||  
Sbjct: 553 GAACTCAAAGTAGGTAAGTAAAC 534  
>miR9559-5p Score: 2.5 R03G\_02194  
Query: 1 TTTGATTTTGGTTCATTTTG 20  
|:|||:|||:|:||||||\*|  
Sbjct: 704 AACTGAAATTAAGTAAACC 685  
>miR9559-5p Score: 2.2 R03G\_16939  
Query: 1 TTTGATTTTGGTTCATTTTG 20  
|||||||:||||\*||\*  
Sbjct: 1225 AACTAAAAGTCAAGTCAAGG 1206  
>miR5387a Score: 2.0 R03G\_17253  
Query: 1 TAACACGCCGGTCTACAGTATC 22  
|||||||\*||\*|||  
Sbjct: 1435 ATTGTGCGGCCAGCTGCCATAG 1414  
>miR5387a Score: 2.0 R03G\_17255  
Query: 1 TAACACGCCGGTCTACAGTATC 22  
|||||||\*||\*|||  
Sbjct: 1435 ATTGTGCGGCCAGCTGCCATAG 1414  
>miR5387a Score: 1.0 R03G\_17217  
Query: 1 TAACACGCCGGTCTACAGTATC 22  
|||||||\*|||  
Sbjct: 163 ATTGTGCGGCCAGATGCCATAG 142  
>miR5387a Score: 2.0 R03G\_16366  
Query: 1 TAACACGCCGGTCTACAGTATC 22

```
|||||*||*|||||
Sbjct: 1465 ATTGTGCGGCCAGCTGCCATAG 1444
>miR5387a Score: 2.0 R03G_13448
Query: 1 TAACACGCCGGTCTACAGTATC 22
|||||*||*|||||
Sbjct: 1450 ATTGTGCGGCCAGCTGCCATAG 1429
>miR5387a Score: 2.0 R03G_11979
Query: 1 TAACACGCCGGTCTACAGTATC 22
|||||*||*|||||
Sbjct: 1438 ATTGTGCGGCCAGCTGCCATAG 1417
>miR5387a Score: 2.0 R03G_10532
Query: 1 TAACACGCCGGTCTACAGTATC 22
|||||*||*|||||
Sbjct: 1450 ATTGTGCGGCCAGCTGCCATAG 1429
>miR5387a Score: 2.0 R03G_10543
Query: 1 TAACACGCCGGTCTACAGTATC 22
|||||*||*|||||
Sbjct: 937 ATTGTGCGGCCAGCTGCCATAG 916
>miR5387a Score: 2.0 R03G_10744
Query: 1 TAACACGCCGGTCTACAGTATC 22
|||||*||*|||||
Sbjct: 1465 ATTGTGCGGCCAGCTGCCATAG 1444
>miR5387a Score: 2.0 R03G_10745
Query: 1 TAACACGCCGGTCTACAGTATC 22
|||||*||*|||||
Sbjct: 433 ATTGTGCGGCCAGCTGCCATAG 412
>miR5387a Score: 2.0 R03G_10747
Query: 1 TAACACGCCGGTCTACAGTATC 22
|||||*||*|||||
Sbjct: 1579 ATTGTGCGGCCAGCTGCCATAG 1558
>miR5387a Score: 2.0 R03G_07735
Query: 1 TAACACGCCGGTCTACAGTATC 22
|||||*||*|||||
Sbjct: 1384 ATTGTGCGGCCAGCTGCCATAG 1363
>miR5387a Score: 2.0 R03G_07862
Query: 1 TAACACGCCGGTCTACAGTATC 22
|||||*||*|||||
Sbjct: 1579 ATTGTGCGGCCAGCTGCCATAG 1558
>miR5256 Score: 2.2 R03G_13428
Query: 1 TAATGGCTTGTAAGAATTAA 20
:||||*||||*||
Sbjct: 2350 GTTATCGAACCTTCTTATTT 2331
>miR5256 Score: 2.2 R03G_12931
Query: 1 TAATGGCTTGTAAGAATTAA 20
:||||*||||*||
```





>miR775 Score: 1.0 R03G\_13903  
Query: 1 TTGCGATGTCTTGCAGTCAA 20  
||||\*|||||||  
Sbjct: 425 AACGCCACAGAACGTCAGTT 406

>miR775 Score: 2.0 R03G\_13574  
Query: 1 TTGCGATGTCTTGCAGTCAA 20  
||||\*|||\*|||||||  
Sbjct: 203 AACGCCACATAACGTCAGTT 184

>miR775 Score: 1.0 R03G\_13664  
Query: 1 TTGCGATGTCTTGCAGTCAA 20  
||||\*|||||||  
Sbjct: 425 AACGCCACAGAACGTCAGTT 406

>miR775 Score: 1.0 R03G\_13672  
Query: 1 TTGCGATGTCTTGCAGTCAA 20  
||||\*|||||||  
Sbjct: 425 AACGCCACAGAACGTCAGTT 406

>miR775 Score: 0.0 R03G\_11486  
Query: 1 TTGCGATGTCTTGCAGTCAA 20  
|||||||  
Sbjct: 197 AACGCTACAGAACGTCAGTT 178

>miR775 Score: 1.0 R03G\_11567  
Query: 1 TTGCGATGTCTTGCAGTCAA 20  
||||\*|||||||  
Sbjct: 1277 AACGCCACAGAACGTCAGTT 1258

>miR775 Score: 1.5 R03G\_09279  
Query: 1 TTGCGATGTCTTGCAGTCAA 20  
||||\*|||||||\*  
Sbjct: 191 AACGCCACAGAACGTCAGTC 172

>miR775 Score: 0.0 R03G\_09419  
Query: 1 TTGCGATGTCTTGCAGTCAA 20  
|||||||  
Sbjct: 245 AACGCTACAGAACGTCAGTT 226

>miR775 Score: 2.5 R03G\_09608  
Query: 1 TTGCGATGTCTTGCAGTCAA 20  
|::|||||||\*|\*||  
Sbjct: 758 AGTGCTACAGAACGTAATTT 739

>miR775 Score: 1.0 R03G\_09656  
Query: 1 TTGCGATGTCTTGCAGTCAA 20  
|||||||:|||||||:|||  
Sbjct: 122 AACGCTACGGAACGTCGGTT 103

>miR775 Score: 2.5 R03G\_09821  
Query: 1 TTGCGATGTCTTGCAGTCAA 20  
||||\*|||||\*|||||  
Sbjct: 122 AACGTCACAGAAAGTCAGTT 103

>miR775 Score: 0.5 R03G\_09838

Query: 1 TTGCGATGTCTTGCAGTCAA 20  
||:|||||||  
Sbjct: 197 AATGCTACAGAACGTCAGTT 178  
>miR775 Score: 2.5 R03G\_10000

Query: 1 TTGCGATGTCTTGCAGTCAA 20  
||||\*||||||\*||\*||  
Sbjct: 122 AACGCCACAGAACATCATTT 103  
>miR775 Score: 1.0 R03G\_08301

Query: 1 TTGCGATGTCTTGCAGTCAA 20  
||||\*|||||||  
Sbjct: 350 AACGCCACAGAACGTCAGTT 331  
>miR775 Score: 2.5 R03G\_08649

Query: 1 TTGCGATGTCTTGCAGTCAA 20  
||||\*||:||||\*|||||  
Sbjct: 152 AACGCCACGGAACATCAGTT 133  
>miR775 Score: 1.0 R03G\_08906

Query: 1 TTGCGATGTCTTGCAGTCAA 20  
||||\*|||||||  
Sbjct: 425 AACGCCACAGAACGTCAGTT 406  
>miR775 Score: 2.5 R03G\_09032

Query: 1 TTGCGATGTCTTGCAGTCAA 20  
||||\*|||||:||||\*  
Sbjct: 117 AACGCCACAGAGTGTCAGTA 98  
>miR775 Score: 2.0 R03G\_06838

Query: 1 TTGCGATGTCTTGCAGTCAA 20  
||||\*||:|||||||\*  
Sbjct: 68 AACGCCACGGAACGTCAGTG 49  
>miR775 Score: 0.5 R03G\_07273

Query: 1 TTGCGATGTCTTGCAGTCAA 20  
|||||||\*||  
Sbjct: 122 AACGCTACAGAACGTCAATT 103  
>miR775 Score: 1.5 R03G\_07438

Query: 1 TTGCGATGTCTTGCAGTCAA 20  
||||\*||:|||||||  
Sbjct: 122 AACGCCACGGAACGTCAGTT 103  
>miR775 Score: 1.0 R03G\_07580

Query: 1 TTGCGATGTCTTGCAGTCAA 20  
||||\*|||||||  
Sbjct: 149 AACGCCACAGAACGTCAGTT 130  
>miR775 Score: 1.0 R03G\_07788

Query: 1 TTGCGATGTCTTGCAGTCAA 20  
||||\*|||||||  
Sbjct: 374 AACGCCACAGAACGTCAGTT 355  
>miR775 Score: 1.0 R03G\_05133

Query: 1 TTGCGATGTCTTGCAGTCAA 20

```
||||*|||||
Sbjct: 374 AACGCCACAGAACGTCAGTT 355
>miR775 Score: 1.0 R03G_05181
Query: 1 TTGCGATGTCTTGCAGTCAA 20
||||*|||||
Sbjct: 425 AACGCCACAGAACGTCAGTT 406
>miR775 Score: 1.0 R03G_05194
Query: 1 TTGCGATGTCTTGCAGTCAA 20
||||*|||||
Sbjct: 425 AACGCCACAGAACGTCAGTT 406
>miR775 Score: 1.0 R03G_05303
Query: 1 TTGCGATGTCTTGCAGTCAA 20
||||*|||||
Sbjct: 425 AACGCCACAGAACGTCAGTT 406
>miR775 Score: 1.0 R03G_02348
Query: 1 TTGCGATGTCTTGCAGTCAA 20
||||*|||||
Sbjct: 137 AACGCCACAGAACGTCAGTT 118
>miR775 Score: 1.0 R03G_02354
Query: 1 TTGCGATGTCTTGCAGTCAA 20
||||*|||||
Sbjct: 425 AACGCCACAGAACGTCAGTT 406
>miR775 Score: 2.0 R03G_02936
Query: 1 TTGCGATGTCTTGCAGTCAA 20
|||:*|||||:|||
Sbjct: 425 AACGTCACAGAACGTCGGTT 406
>miR775 Score: 1.0 R03G_04104
Query: 1 TTGCGATGTCTTGCAGTCAA 20
||:|||||:|||||
Sbjct: 122 AATGCTACGGAACGTCAGTT 103
>miR775 Score: 1.0 R03G_04110
Query: 1 TTGCGATGTCTTGCAGTCAA 20
||:|||||:|||||
Sbjct: 122 AATGCTACGGAACGTCAGTT 103
>miR775 Score: 2.5 R03G_00450
Query: 1 TTGCGATGTCTTGCAGTCAA 20
|||**|||||:|||
Sbjct: 1859 AACAAACAGAACGTCGGTT 1840
>miR775 Score: 2.5 R03G_01013
Query: 1 TTGCGATGTCTTGCAGTCAA 20
||||*|||*|||||:||||
Sbjct: 122 AACGCCACAAAACGTTAGTT 103
>miR775 Score: 0.0 R03G_01528
Query: 1 TTGCGATGTCTTGCAGTCAA 20
|||||
```

Sbjct: 152 AACGCTACAGAACGTCAGTT 133  
>miR775 Score: 1.0 R03G\_01545  
Query: 1 TTGCGATGTCTTGCAGTCAA 20  
||||\*||||||||||||||  
Sbjct: 389 AACGCCACAGAACGTCAGTT 370  
>miR775 Score: 1.0 R03G\_01636  
Query: 1 TTGCGATGTCTTGCAGTCAA 20  
||||\*||||||||||||||  
Sbjct: 374 AACGCCACAGAACGTCAGTT 355  
>miR775 Score: 2.0 R03G\_01923  
Query: 1 TTGCGATGTCTTGCAGTCAA 20  
||||\*||||||\*||||||  
Sbjct: 374 AACGCCACAGAACATCAGTT 355  
>miR7120a Score: 2.5 R03G\_10474  
Query: 1 TGTTATTTGTCAGATTGATTCT 22  
:||||\*||||||||||||||\*:\*|  
Sbjct: 2030 GCAAGAAACAGTCTAAC-GACA 2010  
>miR5678 Score: 1.5 R03G\_16729  
Query: 1 TTCCATGCATAAGACTTTCC 20  
||||||||||||||\*||||\*  
Sbjct: 362 AAGGTACGTATTTCGAAAGA 343  
>miR5678 Score: 2.0 R03G\_16751  
Query: 1 TTCCATGCATAAGACTTTCC 20  
||||||||||||||:\*||\*||  
Sbjct: 83 AAGGTACGTATTTCGAATGG 64  
>miR5678 Score: 0.2 R03G\_16807  
Query: 1 TTCCATGCATAAGACTTTCC 20  
|||||||||||||||||:|  
Sbjct: 494 AAGGTACGTATTCTGAAGGG 475  
>miR5678 Score: 1.0 R03G\_16551  
Query: 1 TTCCATGCATAAGACTTTCC 20  
|||||||||||||||||\*||||  
Sbjct: 494 AAGGTACGTATTCTAAAAGG 475  
>miR5678 Score: 1.0 R03G\_16555  
Query: 1 TTCCATGCATAAGACTTTCC 20  
|||||||||||||||||\*||||  
Sbjct: 494 AAGGTACGTATTCTAAAAGG 475  
>miR5678 Score: 0.2 R03G\_15675  
Query: 1 TTCCATGCATAAGACTTTCC 20  
|||||||||||||||||:|  
Sbjct: 494 AAGGTACGTATTCTGAAGGG 475  
>miR5678 Score: 1.0 R03G\_15141  
Query: 1 TTCCATGCATAAGACTTTCC 20  
|||||||||||||||||\*||||  
Sbjct: 494 AAGGTACGTATTTCGAAAGG 475

>miR5678 Score: 0.2 R03G\_14359  
Query: 1 TTCCATGCATAAAGACTTTCC 20  
|||||||:|  
Sbjct: 494 AAGGTACGTATTCTGAAGGG 475

>miR5678 Score: 2.0 R03G\_14560  
Query: 1 TTCCATGCATAAAGACTTTCC 20  
|||||||\*|\*|  
Sbjct: 362 AAGGTACGTATCCGGAAAGG 343

>miR5678 Score: 2.0 R03G\_13919  
Query: 1 TTCCATGCATAAAGACTTTCC 20  
|||||||:|\*|\*|  
Sbjct: 686 AAGGTACGTATTTCTGAATGG 667

>miR5678 Score: 0.2 R03G\_13720  
Query: 1 TTCCATGCATAAAGACTTTCC 20  
|||||||:|  
Sbjct: 371 AAGGTACGTATTCTGAAGGG 352

>miR5678 Score: 0.5 R03G\_13742  
Query: 1 TTCCATGCATAAAGACTTTCC 20  
|||||:|||||  
Sbjct: 494 AAGGTATGTATTCTGAAAGG 475

>miR5678 Score: 0.0 R03G\_13848  
Query: 1 TTCCATGCATAAAGACTTTCC 20  
|||||||:|  
Sbjct: 494 AAGGTACGTATTCTGAAAGG 475

>miR5678 Score: 2.0 R03G\_13858  
Query: 1 TTCCATGCATAAAGACTTTCC 20  
|||||||\*|\*|  
Sbjct: 125 AAGGTACGTATCCGGAAAGG 106

>miR5678 Score: 2.0 R03G\_12666  
Query: 1 TTCCATGCATAAAGACTTTCC 20  
|||||||\*|\*|  
Sbjct: 125 AAGGTACGTATCCGGAAAGG 106

>miR5678 Score: 2.0 R03G\_12678  
Query: 1 TTCCATGCATAAAGACTTTCC 20  
|||||||:|\*|\*|  
Sbjct: 686 AAGGTACGTATTTGGAATGG 667

>miR5678 Score: 2.0 R03G\_12954  
Query: 1 TTCCATGCATAAAGACTTTCC 20  
|||||||\*|\*|  
Sbjct: 494 AAGGTACGTATCCGGAAAGG 475

>miR5678 Score: 0.5 R03G\_13151  
Query: 1 TTCCATGCATAAAGACTTTCC 20  
|||||||:|\*|  
Sbjct: 494 AAGGTACGTATTCTGAA-GG 476

>miR5678 Score: 2.0 R03G\_13286

Query: 1 TTCCATGCATAAGACTTTCC 20  
|||||||:|\*||\*||  
Sbjct: 686 AAGGTACGTATTTGGAATGG 667  
>miR5678 Score: 1.0 R03G\_12071  
Query: 1 TTCCATGCATAAGACTTTCC 20  
|||||||\*|||||  
Sbjct: 125 AAGGTACGTATTCGAAAGG 106  
>miR5678 Score: 2.0 R03G\_12659  
Query: 1 TTCCATGCATAAGACTTTCC 20  
|||||||:|\*||\*||  
Sbjct: 83 AAGGTACGTATTTCGAATGG 64  
>miR5678 Score: 2.5 R03G\_11281  
Query: 1 TTCCATGCATAAGACTTTCC 20  
|||||||:|\*||\*\*|  
Sbjct: 449 AAGGTACGTATTTGGAATAG 430  
>miR5678 Score: 0.2 R03G\_11401  
Query: 1 TTCCATGCATAAGACTTTCC 20  
|||||||:|  
Sbjct: 494 AAGGTACGTATTCTGAAGGG 475  
>miR5678 Score: 1.0 R03G\_11773  
Query: 1 TTCCATGCATAAGACTTTCC 20  
|||||||\*|||||  
Sbjct: 494 AAGGTACGTATTCTAAAAGG 475  
>miR5678 Score: 0.2 R03G\_10235  
Query: 1 TTCCATGCATAAGACTTTCC 20  
|||||||:|  
Sbjct: 494 AAGGTACGTATTCTGAAGGG 475  
>miR5678 Score: 2.0 R03G\_10529  
Query: 1 TTCCATGCATAAGACTTTCC 20  
|||||||\*|\*|||||  
Sbjct: 125 AAGGTACGTATCCGAAAGG 106  
>miR5678 Score: 0.2 R03G\_10732  
Query: 1 TTCCATGCATAAGACTTTCC 20  
|||||||:|  
Sbjct: 494 AAGGTACGTATTCTGAAGGG 475  
>miR5678 Score: 1.0 R03G\_10762  
Query: 1 TTCCATGCATAAGACTTTCC 20  
|||||||\*|||||  
Sbjct: 494 AAGGTACGTATTCGAAAGG 475  
>miR5678 Score: 2.0 R03G\_10763  
Query: 1 TTCCATGCATAAGACTTTCC 20  
|||||||:|\*||\*||  
Sbjct: 494 AAGGTACGTATTTCGAATGG 475  
>miR5678 Score: 1.0 R03G\_10770  
Query: 1 TTCCATGCATAAGACTTTCC 20

|||||\*|||||  
Sbjct: 494 AAGGTACGTATTCGGAAAGG 475  
>miR5678 Score: 2.0 R03G\_10787  
Query: 1 TTCCATGCATAAGACTTTCC 20  
|||||\*|||\*||  
Sbjct: 494 AAGGTACGTATTTCTGAATGG 475  
>miR5678 Score: 0.2 R03G\_09483  
Query: 1 TTCCATGCATAAGACTTTCC 20  
|||||:||  
Sbjct: 494 AAGGTACGTATTCTGAAGGG 475  
>miR5678 Score: 0.2 R03G\_09499  
Query: 1 TTCCATGCATAAGACTTTCC 20  
|||||:||  
Sbjct: 494 AAGGTACGTATTCTGAAGGG 475  
>miR5678 Score: 0.2 R03G\_09544  
Query: 1 TTCCATGCATAAGACTTTCC 20  
|||||:||  
Sbjct: 494 AAGGTACGTATTCTGAAGGG 475  
>miR5678 Score: 0.0 R03G\_09607  
Query: 1 TTCCATGCATAAGACTTTCC 20  
|||||  
Sbjct: 494 AAGGTACGTATTCTGAAAGG 475  
>miR5678 Score: 1.5 R03G\_08661  
Query: 1 TTCCATGCATAAGACTTTCC 20  
|||||\*|||\*|  
Sbjct: 494 AAGGTACGTATTCCGAAAAG 475  
>miR5678 Score: 0.0 R03G\_08846  
Query: 1 TTCCATGCATAAGACTTTCC 20  
|||||  
Sbjct: 494 AAGGTACGTATTCTGAAAGG 475  
>miR5678 Score: 2.0 R03G\_08847  
Query: 1 TTCCATGCATAAGACTTTCC 20  
|||||\*|||\*||  
Sbjct: 494 AAGGTACGTATTTCTGAATGG 475  
>miR5678 Score: 1.0 R03G\_09168  
Query: 1 TTCCATGCATAAGACTTTCC 20  
|||||\*|||||  
Sbjct: 494 AAGGTACGTATTCGGAAAGG 475  
>miR5678 Score: 1.0 R03G\_07129  
Query: 1 TTCCATGCATAAGACTTTCC 20  
|||||\*|||||  
Sbjct: 362 AAGGTACGTATTCGGAAAGG 343  
>miR5678 Score: 0.2 R03G\_07303  
Query: 1 TTCCATGCATAAGACTTTCC 20  
|||||:||





>miR5678 Score: 2.0 R03G\_05431  
Query: 1 TTCCATGCATAAGACTTTCC 20  
|||||||\*|\*|  
Sbjct: 494 AAGGTACGTATCCGGAAAGG 475

>miR5678 Score: 0.2 R03G\_02689  
Query: 1 TTCCATGCATAAGACTTTCC 20  
|||||||:|  
Sbjct: 494 AAGGTACGTATTCTGAAGGG 475

>miR5678 Score: 1.5 R03G\_02713  
Query: 1 TTCCATGCATAAGACTTTCC 20  
|||||||\*|\*|  
Sbjct: 224 AAGGTACGTATTCGGAAAGA 205

>miR5678 Score: 1.0 R03G\_02822  
Query: 1 TTCCATGCATAAGACTTTCC 20  
|||||||\*|  
Sbjct: 494 AAGGTACGTATTCGGAAAGG 475

>miR5678 Score: 0.0 R03G\_03571  
Query: 1 TTCCATGCATAAGACTTTCC 20  
|||||||  
Sbjct: 494 AAGGTACGTATTCTGAAAGG 475

>miR5678 Score: 2.0 R03G\_03602  
Query: 1 TTCCATGCATAAGACTTTCC 20  
|||||||:|\*|\*|  
Sbjct: 635 AAGGTACGTATTTGGAATGG 616

>miR5678 Score: 1.2 R03G\_03615  
Query: 1 TTCCATGCATAAGACTTTCC 20  
|||||||\*|:|  
Sbjct: 494 AAGGTACGTATTCAGAAGGG 475

>miR5678 Score: 2.0 R03G\_03624  
Query: 1 TTCCATGCATAAGACTTTCC 20  
|||||||:|\*|\*|  
Sbjct: 494 AAGGTACGTATTTCGAATGG 475

>miR5678 Score: 2.0 R03G\_03764  
Query: 1 TTCCATGCATAAGACTTTCC 20  
|||||||\*|\*|  
Sbjct: 125 AAGGTACGTATCCGGAAAGG 106

>miR5678 Score: 2.0 R03G\_00284  
Query: 1 TTCCATGCATAAGACTTTCC 20  
|||||||:|\*|\*|  
Sbjct: 503 AAGGTACGTATTTCGAATGG 484

>miR5678 Score: 1.5 R03G\_00304  
Query: 1 TTCCATGCATAAGACTTTCC 20  
|||||||\*|\*|  
Sbjct: 494 AAGGTACGTATTCGGAAAGA 475

>miR5678 Score: 2.0 R03G\_00679

Query: 1 TTCCATGCATAAGACTTTCC 20  
|||||||:|\*||\*||  
Sbjct: 686 AAGGTACGTATTTGGAATGG 667  
>miR5678 Score: 0.2 R03G\_00681  
Query: 1 TTCCATGCATAAGACTTTCC 20  
|||||||:|  
Sbjct: 494 AAGGTACGTATTCTGAAGGG 475  
>miR5678 Score: 2.0 R03G\_00688  
Query: 1 TTCCATGCATAAGACTTTCC 20  
|||||||:|\*||\*||  
Sbjct: 494 AAGGTACGTATTTGGAATGG 475  
>miR5678 Score: 1.0 R03G\_01188  
Query: 1 TTCCATGCATAAGACTTTCC 20  
|||||||\*|||  
Sbjct: 362 AAGGTACGTATTCGAAAGG 343  
>miR5678 Score: 0.2 R03G\_01322  
Query: 1 TTCCATGCATAAGACTTTCC 20  
|||||||:|  
Sbjct: 380 AAGGTACGTATTCTGAAGGG 361  
>miR5678 Score: 0.0 R03G\_01652  
Query: 1 TTCCATGCATAAGACTTTCC 20  
|||||||:|  
Sbjct: 494 AAGGTACGTATTCTGAAAGG 475  
>miR5678 Score: 0.2 R03G\_01730  
Query: 1 TTCCATGCATAAGACTTTCC 20  
|||||||:|  
Sbjct: 494 AAGGTACGTATTCTGAAGGG 475  
>miR5678 Score: 1.2 R03G\_01956  
Query: 1 TTCCATGCATAAGACTTTCC 20  
|||||||\*|||:|  
Sbjct: 494 AAGGTACGTATTCGAAGGG 475  
>miR5678 Score: 2.0 R03G\_17408  
Query: 1 TTCCATGCATAAGACTTTCC 20  
|||||||:|\*||\*||  
Sbjct: 494 AAGGTACGTATTTGGAATGG 475  
>miR5678 Score: 0.2 R03G\_17400  
Query: 1 TTCCATGCATAAGACTTTCC 20  
|||||||:|  
Sbjct: 368 AAGGTACGTATTCTGAAGGG 349  
>miR5678 Score: 0.2 R03G\_17382  
Query: 1 TTCCATGCATAAGACTTTCC 20  
|||||||:|  
Sbjct: 494 AAGGTACGTATTCTGAAGGG 475  
>miR5678 Score: 1.2 R03G\_17285  
Query: 1 TTCCATGCATAAGACTTTCC 20



Sbjct: 1056 AAGAACTTGTATAACTCCACG 1036  
>miR8610.2 Score: 2.5 R03G\_01654  
Query: 1 TTCTTGAACAAATTGAAG-GGC 21  
\*|||||||\*|||||||\*::|  
Sbjct: 104 CAGAACTTCTTTAACTTCTTTG 83  
>miR8610.2 Score: 2.5 R03G\_01917  
Query: 1 TTCTTGAACAAATTGAAGGG-C 21  
\*\*|||||||\*||\*|  
Sbjct: 78 TCGAACTTGTTTAACTTGCCAG 57  
>miR5261 Score: 2.5 R03G\_07791  
Query: 1 TCATGTCAGATGCTTTGGTCT 21  
|||||||:|\*|||:||\*|  
Sbjct: 517 AGTACAGTTTAGGAAGCCA-A 498  
>miR8658 Score: 2.0 R03G\_08552  
Query: 1 TTGACAAAGTACAGAGACCAT 21  
\*|||||||:|||||||\*|||  
Sbjct: 1183 CACTGTTTTGTGTCTCTCGTA 1163  
>miR8658 Score: 1.5 R03G\_08999  
Query: 1 TTGACAAAGTACAGAGACCAT 21  
|||||||:|\*|||||||  
Sbjct: 435 AACTGTTTCGTATCTCTGGTA 415  
>miR8658 Score: 2.0 R03G\_03092  
Query: 1 TTGACAAAGTACAGAGACCAT 21  
\*|||||||:|||||||\*|||  
Sbjct: 1183 CACTGTTTTGTGTCTCTCGTA 1163  
>miR2111 Score: 0.0 R03G\_15290  
Query: 1 TAAACTGTGTTTGGGTTTGG 20  
|||||||  
Sbjct: 186 ATTTGACACAAACCCAAACC 167  
>miR2111 Score: 0.0 R03G\_15497  
Query: 1 TAAACTGTGTTTGGGTTTGG 20  
|||||||  
Sbjct: 186 ATTTGACACAAACCCAAACC 167  
>miR2111 Score: 0.5 R03G\_13307  
Query: 1 TAAACTGTGTTTGGGTTTGG 20  
|||||||  
Sbjct: 219 ATTTGACACAAACCCAAACC 200  
>miR2111 Score: 0.5 R03G\_12685  
Query: 1 TAAACTGTGTTTGGGTTTGG 20  
|||||:|||||||  
Sbjct: 240 ATTTGATACAAACCCAAACC 221  
>miR2111 Score: 0.8 R03G\_13022  
Query: 1 TAAACTGTGTTTGGGTTTGG 20  
|||||||:|||||||:  
Sbjct: 258 ATTTGACACGAACCCAAACT 239

>miR2111 Score: 0.5 R03G\_12243  
Query: 1 TAAACTGTGTTTGGGTTTGG 20  
|||||:|||||||  
Sbjct: 258 ATTTGATACAAACCCAAACC 239

>miR2111 Score: 0.0 R03G\_12446  
Query: 1 TAAACTGTGTTTGGGTTTGG 20  
|||||||  
Sbjct: 258 ATTTGACACAAACCCAAACC 239

>miR2111 Score: 2.0 R03G\_11292  
Query: 1 TAAACTGTGTTTGGGTTTGG 20  
|||||||\*|||\*  
Sbjct: 3314 ATTTGACACAAACATAAACA 3295

>miR2111 Score: 2.5 R03G\_10271  
Query: 1 TAAACTGTGTTTGGGTTTGG 20  
|||||||:|\*\*::  
Sbjct: 929 ATTTGACACAAACCTA-TTT 911

>miR2111 Score: 2.0 R03G\_10368  
Query: 1 TAAACTGTGTTTGGGTTTGG 20  
\*|||||||\*|||\*  
Sbjct: 8723 TTTTGACACAAACGCAAACG 8704

>miR2111 Score: 0.5 R03G\_10657  
Query: 1 TAAACTGTGTTTGGGTTTGG 20  
|||||||:||||  
Sbjct: 258 ATTTGACACAAACCCGAACC 239

>miR2111 Score: 2.5 R03G\_10979  
Query: 1 TAAACTGTGTTTGGGTTT-GG 20  
||||\*||:||||||\*||  
Sbjct: 24 ATTTGCTACGAACCCAAAGCC 4

>miR2111 Score: 1.0 R03G\_08447  
Query: 1 TAAACTGTGTTTGGGTTTGG 20  
|||||||\*||||  
Sbjct: 258 ATTTGACACAAACCAAAAACC 239

>miR2111 Score: 0.2 R03G\_09087  
Query: 1 TAAACTGTGTTTGGGTTTGG 20  
|||||||:|||||||  
Sbjct: 258 ATTTGACACAAACCCAAACT 239

>miR2111 Score: 0.0 R03G\_05724  
Query: 1 TAAACTGTGTTTGGGTTTGG 20  
|||||||  
Sbjct: 219 ATTTGACACAAACCCAAACC 200

>miR2111 Score: 2.5 R03G\_06640  
Query: 1 TAAACTGTGTTTGGGTTTGG 20  
||||\*||\*||||||\*|  
Sbjct: 884 ATTTGTCTACTAACCCAAAAC 865

>miR2111 Score: 0.0 R03G\_04502

Query: 1 TAAACTGTGTTTGGGTTTGG 20  
|||||  
Sbjct: 258 ATTTGACACAAACCCAAACC 239  
>miR2111 Score: 0.0 R03G\_02942  
Query: 1 TAAACTGTGTTTGGGTTTGG 20  
|||||  
Sbjct: 258 ATTTGACACAAACCCAAACC 239  
>miR2111 Score: 0.0 R03G\_03523  
Query: 1 TAAACTGTGTTTGGGTTTGG 20  
|||||  
Sbjct: 258 ATTTGACACAAACCCAAACC 239  
>miR2111 Score: 0.8 R03G\_03971  
Query: 1 TAAACTGTGTTTGGGTTTGG 20  
|||||:|||||:  
Sbjct: 258 ATTTGACACGAACCCAAACT 239  
>miR2111 Score: 0.0 R03G\_04017  
Query: 1 TAAACTGTGTTTGGGTTTGG 20  
|||||  
Sbjct: 258 ATTTGACACAAACCCAAACC 239  
>miR2111 Score: 2.0 R03G\_00850  
Query: 1 TAAACTGTGTTTGGGTTTGG 20  
|||||\*|||:|||\*||  
Sbjct: 184 ATTTGACACCAACTCAA-CC 166  
>miR2111 Score: 0.0 R03G\_01530  
Query: 1 TAAACTGTGTTTGGGTTTGG 20  
|||||  
Sbjct: 258 ATTTGACACAAACCCAAACC 239  
>miR7817a Score: 0.0 R03G\_17165  
Query: 1 TTTGGTTGAACTTGTCTCGAGAA 23  
|||||  
Sbjct: 739 AAACCAACTTGAACAGAGCTCTT 717  
>miR7817a Score: 0.5 R03G\_17021  
Query: 1 TTTGGTTGAACTTGTCTCGAGAA 23  
|||||\*  
Sbjct: 4198 AAACCAACTTGAACAGAGCTCTC 4176  
>miR7817a Score: 0.5 R03G\_16693  
Query: 1 TTTGGTTGAACTTGTCTCGAGAA 23  
|||||\*  
Sbjct: 4363 AAACCAACTTGAACAGAGCTCTG 4341  
>miR7817a Score: 0.0 R03G\_16361  
Query: 1 TTTGGTTGAACTTGTCTCGAGAA 23  
|||||  
Sbjct: 4198 AAACCAACTTGAACAGAGCTCTT 4176  
>miR7817a Score: 0.5 R03G\_16539  
Query: 1 TTTGGTTGAACTTGTCTCGAGAA 23

```
|||||*
Sbjct: 4255 AAACCAACTTGAACAGAGCTCTG 4233
>miR7817a Score: 0.0 R03G_13918
Query: 1 TTTGGTTGAACTTGTCTCGAGAA 23
|||||
Sbjct: 4363 AAACCAACTTGAACAGAGCTCTT 4341
>miR7817a Score: 0.0 R03G_14347
Query: 1 TTTGGTTGAACTTGTCTCGAGAA 23
|||||
Sbjct: 4294 AAACCAACTTGAACAGAGCTCTT 4272
>miR7817a Score: 0.5 R03G_12673
Query: 1 TTTGGTTGAACTTGTCTCGAGAA 23
|||||*
Sbjct: 3499 AAACCAACTTGAACAGAGCTCTC 3477
>miR7817a Score: 0.5 R03G_12677
Query: 1 TTTGGTTGAACTTGTCTCGAGAA 23
|||||*
Sbjct: 4198 AAACCAACTTGAACAGAGCTCTC 4176
>miR7817a Score: 0.0 R03G_12527
Query: 1 TTTGGTTGAACTTGTCTCGAGAA 23
|||||
Sbjct: 4363 AAACCAACTTGAACAGAGCTCTT 4341
>miR7817a Score: 0.0 R03G_12530
Query: 1 TTTGGTTGAACTTGTCTCGAGAA 23
|||||
Sbjct: 181 AAACCAACTTGAACAGAGCTCTT 159
>miR7817a Score: 0.5 R03G_12538
Query: 1 TTTGGTTGAACTTGTCTCGAGAA 23
|||||*
Sbjct: 4255 AAACCAACTTGAACAGAGCTCTC 4233
>miR7817a Score: 2.2 R03G_11232
Query: 1 TTTGGTTGAACTTGTCTCGAGAA 23
|||*||:|||||*|:|
Sbjct: 28 AAACGAATTTGAACAGAGATTTT 6
>miR7817a Score: 0.5 R03G_11473
Query: 1 TTTGGTTGAACTTGTCTCGAGAA 23
|||||*
Sbjct: 181 AAACCAACTTGAACAGAGCTCTG 159
>miR7817a Score: 0.5 R03G_10804
Query: 1 TTTGGTTGAACTTGTCTCGAGAA 23
|||||*
Sbjct: 4204 AAACCAACTTGAACAGAGCTCTC 4182
>miR7817a Score: 0.0 R03G_09493
Query: 1 TTTGGTTGAACTTGTCTCGAGAA 23
|||||
```



Sbjct: 2911 AAACCAACTTGAACAGAGCTCTT 2889  
>miR7817a Score: 0.5 R03G\_09547  
Query: 1 TTTGGTTGAACTTGTCTCGAGAA 23  
|||||\*  
Sbjct: 4198 AAACCAACTTGAACAGAGCTCTC 4176  
>miR7817a Score: 0.5 R03G\_08107  
Query: 1 TTTGGTTGAACTTGTCTCGAGAA 23  
|||||\*  
Sbjct: 721 AAACCAACTTGAACAGAGCTCTG 699  
>miR7817a Score: 0.0 R03G\_08831  
Query: 1 TTTGGTTGAACTTGTCTCGAGAA 23  
|||||  
Sbjct: 109 AAACCAACTTGAACAGAGCTCTT 87  
>miR7817a Score: 0.5 R03G\_07311  
Query: 1 TTTGGTTGAACTTGTCTCGAGAA 23  
|||||\*  
Sbjct: 4204 AAACCAACTTGAACAGAGCTCTC 4182  
>miR7817a Score: 0.5 R03G\_06425  
Query: 1 TTTGGTTGAACTTGTCTCGAGAA 23  
|||||\*  
Sbjct: 4198 AAACCAACTTGAACAGAGCTCTC 4176  
>miR7817a Score: 0.5 R03G\_04933  
Query: 1 TTTGGTTGAACTTGTCTCGAGAA 23  
|||||\*  
Sbjct: 4198 AAACCAACTTGAACAGAGCTCTC 4176  
>miR7817a Score: 0.5 R03G\_05330  
Query: 1 TTTGGTTGAACTTGTCTCGAGAA 23  
|||||\*  
Sbjct: 4198 AAACCAACTTGAACAGAGCTCTC 4176  
>miR7817a Score: 0.5 R03G\_05344  
Query: 1 TTTGGTTGAACTTGTCTCGAGAA 23  
|||||\*  
Sbjct: 4024 AAACCAACTTGAACAGAGCTCTC 4002  
>miR7817a Score: 0.5 R03G\_05514  
Query: 1 TTTGGTTGAACTTGTCTCGAGAA 23  
|||||\*  
Sbjct: 712 AAACCAACTTGAACAGAGCTCTC 690  
>miR7817a Score: 0.5 R03G\_02704  
Query: 1 TTTGGTTGAACTTGTCTCGAGAA 23  
|||||\*  
Sbjct: 4198 AAACCAACTTGAACAGAGCTCTC 4176  
>miR7817a Score: 0.5 R03G\_02820  
Query: 1 TTTGGTTGAACTTGTCTCGAGAA 23  
|||||\*  
Sbjct: 181 AAACCAACTTGAACAGAGCTCTG 159

>miR7817a Score: 0.0 R03G\_03618  
Query: 1 TTTGGTTGAACTTGTCTCGAGAA 23  
|||||  
Sbjct: 181 AAACCAACTTGAACAGAGCTCTT 159

>miR7817a Score: 0.5 R03G\_03765  
Query: 1 TTTGGTTGAACTTGTCTCGAGAA 23  
||||:|||||  
Sbjct: 181 AAACCAACTTGAACAGAGCTCTT 159

>miR7817a Score: 0.5 R03G\_03778  
Query: 1 TTTGGTTGAACTTGTCTCGAGAA 23  
|||||\*  
Sbjct: 4156 AAACCAACTTGAACAGAGCTCTC 4134

>miR7817a Score: 0.0 R03G\_04126  
Query: 1 TTTGGTTGAACTTGTCTCGAGAA 23  
|||||  
Sbjct: 4357 AAACCAACTTGAACAGAGCTCTT 4335

>miR7817a Score: 0.5 R03G\_00239  
Query: 1 TTTGGTTGAACTTGTCTCGAGAA 23  
|||||\*  
Sbjct: 718 AAACCAACTTGAACAGAGCTCTG 696

>miR7817a Score: 0.0 R03G\_00298  
Query: 1 TTTGGTTGAACTTGTCTCGAGAA 23  
|||||  
Sbjct: 718 AAACCAACTTGAACAGAGCTCTT 696

>miR7817a Score: 0.5 R03G\_00701  
Query: 1 TTTGGTTGAACTTGTCTCGAGAA 23  
|||||\*  
Sbjct: 109 AAACCAACTTGAACAGAGCTCTG 87

>miR7817a Score: 2.5 R03G\_00973  
Query: 1 TTTGGTTGAACTTGTCTCGAGAA 23  
||||||\*||\*||\*  
Sbjct: 219 AAACCAACATGAACAGAAC-CTA 198

>miR7817a Score: 0.0 R03G\_01614  
Query: 1 TTTGGTTGAACTTGTCTCGAGAA 23  
|||||  
Sbjct: 4204 AAACCAACTTGAACAGAGCTCTT 4182

>miR7817a Score: 0.5 R03G\_01937  
Query: 1 TTTGGTTGAACTTGTCTCGAGAA 23  
|||||\*  
Sbjct: 181 AAACCAACTTGAACAGAGCTCTG 159

>miR7817a Score: 0.5 R03G\_01966  
Query: 1 TTTGGTTGAACTTGTCTCGAGAA 23  
|||||\*  
Sbjct: 1246 AAACCAACTTGAACAGAGCTCTG 1224

>miR7817a Score: 0.5 R03G\_17422

Query: 1 TTTGGTTGAACTTGTCTCGAGAA 23  
|||||||\*  
Sbjct: 3499 AAACCAACTTGAACAGAGCTCTC 3477  
>miR8581 Score: 2.5 R03G\_00004  
Query: 1 TAGAGAATTTTGTAGACAACTG 22  
:|||||||\*|\*|:  
Sbjct: 142 GTCTCTTAAACATTTATT-AT 122  
>miR391 Score: 0.0 R03G\_16708  
Query: 1 TACGCAGAGGGAGACGTCG 19  
|||||||  
Sbjct: 1204 ATGCGTCTCCCTCTGCAGC 1186  
>miR391 Score: 0.0 R03G\_15674  
Query: 1 TACGCAGAGGGAGACGTCG 19  
|||||||  
Sbjct: 1555 ATGCGTCTCCCTCTGCAGC 1537  
>miR391 Score: 0.0 R03G\_14622  
Query: 1 TACGCAGAGGGAGACGTCG 19  
|||||||  
Sbjct: 262 ATGCGTCTCCCTCTGCAGC 244  
>miR391 Score: 0.0 R03G\_13746  
Query: 1 TACGCAGAGGGAGACGTCG 19  
|||||||  
Sbjct: 58 ATGCGTCTCCCTCTGCAGC 40  
>miR391 Score: 0.0 R03G\_13865  
Query: 1 TACGCAGAGGGAGACGTCG 19  
|||||||  
Sbjct: 2476 ATGCGTCTCCCTCTGCAGC 2458  
>miR391 Score: 0.0 R03G\_12669  
Query: 1 TACGCAGAGGGAGACGTCG 19  
|||||||  
Sbjct: 1204 ATGCGTCTCCCTCTGCAGC 1186  
>miR391 Score: 0.0 R03G\_12961  
Query: 1 TACGCAGAGGGAGACGTCG 19  
|||||||  
Sbjct: 1537 ATGCGTCTCCCTCTGCAGC 1519  
>miR391 Score: 0.0 R03G\_12964  
Query: 1 TACGCAGAGGGAGACGTCG 19  
|||||||  
Sbjct: 1204 ATGCGTCTCCCTCTGCAGC 1186  
>miR391 Score: 0.0 R03G\_12075  
Query: 1 TACGCAGAGGGAGACGTCG 19  
|||||||  
Sbjct: 1204 ATGCGTCTCCCTCTGCAGC 1186  
>miR391 Score: 0.0 R03G\_11279  
Query: 1 TACGCAGAGGGAGACGTCG 19

```
|||||
Sbjct: 166 ATGCGTCTCCCTCTGCAGC 148
>miR391 Score: 0.0 R03G_11952
Query: 1 TACGCAGAGGGAGACGTCG 19
|||||
Sbjct: 1582 ATGCGTCTCCCTCTGCAGC 1564
>miR391 Score: 0.0 R03G_10777
Query: 1 TACGCAGAGGGAGACGTCG 19
|||||
Sbjct: 2380 ATGCGTCTCCCTCTGCAGC 2362
>miR391 Score: 0.0 R03G_09927
Query: 1 TACGCAGAGGGAGACGTCG 19
|||||
Sbjct: 1204 ATGCGTCTCCCTCTGCAGC 1186
>miR391 Score: 0.0 R03G_09951
Query: 1 TACGCAGAGGGAGACGTCG 19
|||||
Sbjct: 1462 ATGCGTCTCCCTCTGCAGC 1444
>miR391 Score: 0.0 R03G_08609
Query: 1 TACGCAGAGGGAGACGTCG 19
|||||
Sbjct: 1189 ATGCGTCTCCCTCTGCAGC 1171
>miR391 Score: 1.0 R03G_07869
Query: 1 TACGCAGAGGGAGACGTCG 19
||||*|||||
Sbjct: 2449 ATGCATCTCCCTCTGCAGC 2431
>miR391 Score: 2.5 R03G_05524
Query: 1 TACGCAGAGGGAGACGTCG 19
***|||||
Sbjct: 1204 TATCGTCTCCCTCTGCAGC 1186
>miR391 Score: 0.0 R03G_05925
Query: 1 TACGCAGAGGGAGACGTCG 19
|||||
Sbjct: 1204 ATGCGTCTCCCTCTGCAGC 1186
>miR391 Score: 0.0 R03G_05927
Query: 1 TACGCAGAGGGAGACGTCG 19
|||||
Sbjct: 1204 ATGCGTCTCCCTCTGCAGC 1186
>miR391 Score: 0.0 R03G_00684
Query: 1 TACGCAGAGGGAGACGTCG 19
|||||
Sbjct: 583 ATGCGTCTCCCTCTGCAGC 565
>miR391 Score: 0.0 R03G_01720
Query: 1 TACGCAGAGGGAGACGTCG 19
|||||
```

Sbjct: 1189 ATGCGTCTCCCTCTGCAGC 1171  
>miR399f Score: 2.0 R03G\_16425  
Query: 1 TGCCAACGCGATTTGCCTG 20  
\*|||||:|\*|||||||  
Sbjct: 36 TCGGTTGTGCCAAACAGGAC 17  
>miR399f Score: 2.0 R03G\_16556  
Query: 1 TGCCAACGCGATTTGCCTG 20  
\*|||||||\*|||\*|  
Sbjct: 36 CCGGTTGCGCTATACAGGCC 17  
>miR399f Score: 0.0 R03G\_16135  
Query: 1 TGCCAACGCGATTTGCCTG 20  
|||||||  
Sbjct: 36 ACGGTTGCGCTAAACAGGAC 17  
>miR399f Score: 0.0 R03G\_15285  
Query: 1 TGCCAACGCGATTTGCCTG 20  
|||||||  
Sbjct: 36 ACGGTTGCGCTAAACAGGAC 17  
>miR399f Score: 1.5 R03G\_15161  
Query: 1 TGCCAACGCGATTTGCCTG 20  
|||||:||||||\*|||  
Sbjct: 36 ACGGTTGTGCTAAACAAGAC 17  
>miR399f Score: 2.0 R03G\_15255  
Query: 1 TGCCAACGCGATTTGCCTG 20  
\*|||||:|\*|||||||  
Sbjct: 36 TCGGTTGTGCCAAACAGGAC 17  
>miR399f Score: 2.0 R03G\_14494  
Query: 1 TGCCAACGCGATTTGCCTG 20  
\*|||||||\*|||\*|  
Sbjct: 36 CCGGTTGCGCTATACAGGCC 17  
>miR399f Score: 2.0 R03G\_14628  
Query: 1 TGCCAACGCGATTTGCCTG 20  
\*|||||||\*|||\*|  
Sbjct: 36 CCGGTTGCGCTATACAGGCC 17  
>miR399f Score: 2.0 R03G\_12170  
Query: 1 TGCCAACGCGATTTGCCTG 20  
\*|||||:|\*|||||||  
Sbjct: 36 TCGGTTGTGCCAAACAGGAC 17  
>miR399f Score: 0.0 R03G\_11770  
Query: 1 TGCCAACGCGATTTGCCTG 20  
|||||||  
Sbjct: 36 ACGGTTGCGCTAAACAGGAC 17  
>miR399f Score: 0.0 R03G\_10523  
Query: 1 TGCCAACGCGATTTGCCTG 20  
|||||||  
Sbjct: 36 ACGGTTGCGCTAAACAGGAC 17

>miR399f Score: 0.0 R03G\_09599  
Query: 1 TGCCAACGCGATTTGTCCTG 20  
|||||  
Sbjct: 36 ACGGTTGCGCTAAACAGGAC 17

>miR399f Score: 0.0 R03G\_09932  
Query: 1 TGCCAACGCGATTTGTCCTG 20  
|||||  
Sbjct: 36 ACGGTTGCGCTAAACAGGAC 17

>miR399f Score: 2.0 R03G\_09935  
Query: 1 TGCCAACGCGATTTGTCCTG 20  
\*|||||\*|||\*|  
Sbjct: 36 CCGGTTGCGCTATACAGGCC 17

>miR399f Score: 1.0 R03G\_09956  
Query: 1 TGCCAACGCGATTTGTCCTG 20  
|||\*|||||  
Sbjct: 36 ACGATTGCGCTAAACAGGAC 17

>miR399f Score: 1.5 R03G\_07726  
Query: 1 TGCCAACGCGATTTGTCCTG 20  
|||||:|||||\*|||  
Sbjct: 36 ACGGTTGTGCTAAACAAGAC 17

>miR399f Score: 2.0 R03G\_07843  
Query: 1 TGCCAACGCGATTTGTCCTG 20  
\*|||||\*|||\*|  
Sbjct: 36 CCGGTTGCGCTATACAGGCC 17

>miR399f Score: 1.5 R03G\_05912  
Query: 1 TGCCAACGCGATTTGTCCTG 20  
|||||:||\*|||||  
Sbjct: 30 ACGGTTGTGCAAAACAGGAC 11

>miR399f Score: 2.0 R03G\_06412  
Query: 1 TGCCAACGCGATTTGTCCTG 20  
\*|||||\*|||\*|  
Sbjct: 36 CCGGTTGCGCTATACAGGCC 17

>miR399f Score: 2.5 R03G\_04734  
Query: 1 TGCCAACGCGATTTGTCCTG 20  
\*|\*|||||:|||||\*  
Sbjct: 516 CCAGTTGCGCTAGACAGGAA 497

>miR399f Score: 0.0 R03G\_03105  
Query: 1 TGCCAACGCGATTTGTCCTG 20  
|||||  
Sbjct: 36 ACGGTTGCGCTAAACAGGAC 17

>miR399f Score: 2.0 R03G\_04214  
Query: 1 TGCCAACGCGATTTGTCCTG 20  
\*|||||\*|||\*|  
Sbjct: 36 CCGGTTGCGCTATACAGGCC 17

>miR399f Score: 0.0 R03G\_04217

Query: 1 TGCCAACGCGATTTGTCCTG 20  
 |||  
 Sbjct: 36 ACGTTGCGCTAAACAGGAC 17  
 >miR399f Score: 2.0 R03G\_01715  
 Query: 1 TGCCAACGCGATTTGTCCTG 20  
 \*|||:|\*|||  
 Sbjct: 36 TCGTTGTGCCAACAGGAC 17  
 >miR399f Score: 2.0 R03G\_01882  
 Query: 1 TGCCAACGCGATTTGTCCTG 20  
 \*|||\*|||\*|  
 Sbjct: 36 CCGTTGCGCTATACAGGCC 17  
 >miR399f Score: 2.0 R03G\_01885  
 Query: 1 TGCCAACGCGATTTGTCCTG 20  
 \*|||\*|||\*|  
 Sbjct: 36 CCGTTGCGCTATACAGGCC 17  
 >miR399f Score: 0.0 R03G\_01941  
 Query: 1 TGCCAACGCGATTTGTCCTG 20  
 |||  
 Sbjct: 36 ACGTTGCGCTAAACAGGAC 17  
 >miR399f Score: 2.0 R03G\_17339  
 Query: 1 TGCCAACGCGATTTGTCCTG 20  
 \*|||\*|||\*|  
 Sbjct: 36 CCGTTGCGCTATACAGGCC 17  
 >miR399f Score: 2.0 R03G\_17290  
 Query: 1 TGCCAACGCGATTTGTCCTG 20  
 \*|||\*|||\*|  
 Sbjct: 36 TCGTTGCGCTATACAGGCC 17  
 >miR824-5p Score: 2.5 R03G\_05999  
 Query: 1 TAGACCATTGTGAGAAG-GG 20  
 |||:|\*|||:|\*:  
 Sbjct: 48 ATCTGGTAAACGTTTTTTGTC 28  
 >miR824-5p Score: 2.5 R03G\_06174  
 Query: 1 TAGACCATTGTGAGAAGGG 20  
 :|\*|||:|\*:  
 Sbjct: 178 GTTTTGTAAGCACTCTTCC 159  
 >miR824-5p Score: 2.5 R03G\_01069  
 Query: 1 TAGACCATTGTGAGAAGGG 20  
 \*|:|||||:|\*|  
 Sbjct: 2009 CTTTGGTAAACACTTTTAGC 1990  
 >miR824-5p Score: 2.2 R03G\_01701  
 Query: 1 TAGACCATTGTGAGAAGG-G 20  
 |||\*|||\*|  
 Sbjct: 136 ATCTGGTAAGAACTCTTCTGC 116  
 >miR5632-3p Score: 2.0 R03G\_17202  
 Query: 1 TTGGATTTAAGTCTGGATACT 21





Sbjct: 415 ACCCTAAATTCAGGCCTGAGA 395  
>miR5632-3p Score: 1.2 R03G\_16124  
Query: 1 TTGGATTTAAGTCTGGATACT 21  
|||||:|\*||  
Sbjct: 460 AACCTAAATTCAGGCCTGAGA 440  
>miR5632-3p Score: 1.2 R03G\_15286  
Query: 1 TTGGATTTAAGTCTGGATACT 21  
|||||:|\*||  
Sbjct: 460 AACCTAAATTCAGGCCTGAGA 440  
>miR5632-3p Score: 0.5 R03G\_15582  
Query: 1 TTGGATTTAAGTCTGGATACT 21  
|||||\*|||  
Sbjct: 211 AACCTAAATTCAGACCTCTGA 191  
>miR5632-3p Score: 1.2 R03G\_14981  
Query: 1 TTGGATTTAAGTCTGGATACT 21  
|||||:|\*||  
Sbjct: 460 AACCTAAATTCAGGCCTGAGA 440  
>miR5632-3p Score: 1.2 R03G\_15145  
Query: 1 TTGGATTTAAGTCTGGATACT 21  
|||||:|\*||  
Sbjct: 460 AACCTAAATTCAGGCCTGAGA 440  
>miR5632-3p Score: 1.2 R03G\_15170  
Query: 1 TTGGATTTAAGTCTGGATACT 21  
|||||:|\*||  
Sbjct: 460 AACCTAAATTCAGGCCTGAGA 440  
>miR5632-3p Score: 1.2 R03G\_14784  
Query: 1 TTGGATTTAAGTCTGGATACT 21  
|||||:|\*||  
Sbjct: 460 AACCTAAATTCAGGCCTGAGA 440  
>miR5632-3p Score: 0.0 R03G\_13919  
Query: 1 TTGGATTTAAGTCTGGATACT 21  
|||||  
Sbjct: 1024 AACCTAAATTCAGACCTATGA 1004  
>miR5632-3p Score: 0.5 R03G\_13453  
Query: 1 TTGGATTTAAGTCTGGATACT 21  
|||||\*|||  
Sbjct: 211 AACCTAAATTCAGACCTCTGA 191  
>miR5632-3p Score: 2.0 R03G\_13734  
Query: 1 TTGGATTTAAGTCTGGATACT 21  
|\*|||||\*|\*|  
Sbjct: 814 ATCCTAAATTCAGACCTCTCA 794  
>miR5632-3p Score: 1.2 R03G\_13752  
Query: 1 TTGGATTTAAGTCTGGATACT 21  
|||||:|\*||  
Sbjct: 460 AACCTAAATTCAGGCCTGAGA 440

>miR5632-3p Score: 2.5 R03G\_13855  
Query: 1 TTGGATTTAAGTCTGGATACT 21  
||\*\*|||||||\*|  
Sbjct: 2962 AAAATAAATTCAGACCTATTA 2942

>miR5632-3p Score: 1.2 R03G\_12950  
Query: 1 TTGGATTTAAGTCTGGATACT 21  
|||||||:|\*||  
Sbjct: 460 AACCTAAATTCAGGCCTGAGA 440

>miR5632-3p Score: 1.0 R03G\_13286  
Query: 1 TTGGATTTAAGTCTGGATACT 21  
|||||||\*||  
Sbjct: 1024 AACCTAAATTCAGACCTCCGA 1004

>miR5632-3p Score: 2.5 R03G\_12067  
Query: 1 TTGGATTTAAGTCTGGATACT 21  
||\*\*|||||||\*|  
Sbjct: 2962 AAAATAAATTCAGACCTATTA 2942

>miR5632-3p Score: 0.5 R03G\_12166  
Query: 1 TTGGATTTAAGTCTGGATACT 21  
|||||||\*|||  
Sbjct: 832 AACCTAAATTCAGACCTTTGA 812

>miR5632-3p Score: 0.5 R03G\_12659  
Query: 1 TTGGATTTAAGTCTGGATACT 21  
|||||||\*|||  
Sbjct: 421 AACCTAAATTCAGACCTCTGA 401

>miR5632-3p Score: 0.5 R03G\_11281  
Query: 1 TTGGATTTAAGTCTGGATACT 21  
|||||||\*|||  
Sbjct: 787 AACCTAAATTCAGACCTCTGA 767

>miR5632-3p Score: 2.0 R03G\_11411  
Query: 1 TTGGATTTAAGTCTGGATACT 21  
|\*|||||||\*|\*|  
Sbjct: 451 ATCCTAAATTCAGACCTCTCA 431

>miR5632-3p Score: 1.2 R03G\_11533  
Query: 1 TTGGATTTAAGTCTGGATACT 21  
|||||||:|\*||  
Sbjct: 460 AACCTAAATTCAGGCCTGAGA 440

>miR5632-3p Score: 1.2 R03G\_11536  
Query: 1 TTGGATTTAAGTCTGGATACT 21  
|||||||:|\*||  
Sbjct: 460 AACCTAAATTCAGGCCTGAGA 440

>miR5632-3p Score: 2.2 R03G\_10237  
Query: 1 TTGGATTTAAGTCTGGATACT 21  
|\*|||||||:|\*||  
Sbjct: 400 ACCCTAAATTCAGGCCTGAGA 380

>miR5632-3p Score: 0.5 R03G\_10550

Query: 1 TTGGATTTAAGTCTGGATACT 21  
|||||||\*|||  
Sbjct: 832 AACCTAAATTCAGACCTTTGA 812  
>miR5632-3p Score: 1.5 R03G\_10768  
Query: 1 TTGGATTTAAGTCTGGATACT 21  
|||\*|||||||\*|||  
Sbjct: 37 AACGTAAATTCAGACCTCTGA 17  
>miR5632-3p Score: 2.0 R03G\_10772  
Query: 1 TTGGATTTAAGTCTGGATACT 21  
|||||||:|||||\*|||\*|||  
Sbjct: 721 AACCTAAGTTCAGTCCTCTGA 701  
>miR5632-3p Score: 0.5 R03G\_10787  
Query: 1 TTGGATTTAAGTCTGGATACT 21  
|||||||\*|||  
Sbjct: 832 AACCTAAATTCAGACCTCTGA 812  
>miR5632-3p Score: 1.2 R03G\_10797  
Query: 1 TTGGATTTAAGTCTGGATACT 21  
|||||||:|||:\*|||  
Sbjct: 460 AACCTAAATTCAGGCCTGAGA 440  
>miR5632-3p Score: 1.2 R03G\_09926  
Query: 1 TTGGATTTAAGTCTGGATACT 21  
|||||||:|||:\*|||  
Sbjct: 460 AACCTAAATTCAGGCCTGAGA 440  
>miR5632-3p Score: 1.2 R03G\_10050  
Query: 1 TTGGATTTAAGTCTGGATACT 21  
|||||||:|||:\*|||  
Sbjct: 460 AACCTAAATTCAGGCCTGAGA 440  
>miR5632-3p Score: 0.5 R03G\_10220  
Query: 1 TTGGATTTAAGTCTGGATACT 21  
|||||||\*|||  
Sbjct: 271 AACCTAAATTCAGACCTCTGA 251  
>miR5632-3p Score: 2.0 R03G\_08657  
Query: 1 TTGGATTTAAGTCTGGATACT 21  
|||||||:|||||\*|||\*|||  
Sbjct: 724 AACCTAAGTTCAGTCCTCTGA 704  
>miR5632-3p Score: 0.5 R03G\_08847  
Query: 1 TTGGATTTAAGTCTGGATACT 21  
|||||||\*|||  
Sbjct: 832 AACCTAAATTCAGACCTTTGA 812  
>miR5632-3p Score: 1.2 R03G\_07136  
Query: 1 TTGGATTTAAGTCTGGATACT 21  
|||||||:|||:\*|||  
Sbjct: 151 AACCTAAATTCAGGCCTGAGA 131  
>miR5632-3p Score: 2.2 R03G\_07298  
Query: 1 TTGGATTTAAGTCTGGATACT 21

|\*|||||||:|\*||  
Sbjct: 460 ACCCTAAATTCAGGCCTGAGA 440  
>miR5632-3p Score: 0.0 R03G\_07690  
Query: 1 TTGGATTTAAGTCTGGATACT 21  
|||||||  
Sbjct: 832 AACCTAAATTCAGACCTATGA 812  
>miR5632-3p Score: 0.0 R03G\_07707  
Query: 1 TTGGATTTAAGTCTGGATACT 21  
|||||||  
Sbjct: 1024 AACCTAAATTCAGACCTATGA 1004  
>miR5632-3p Score: 1.2 R03G\_07723  
Query: 1 TTGGATTTAAGTCTGGATACT 21  
|||||||:|\*||  
Sbjct: 460 AACCTAAATTCAGGCCTGAGA 440  
>miR5632-3p Score: 1.2 R03G\_05522  
Query: 1 TTGGATTTAAGTCTGGATACT 21  
|||||||:|\*||  
Sbjct: 826 AACCTAAATTCAGGCCTGAGA 806  
>miR5632-3p Score: 2.0 R03G\_05945  
Query: 1 TTGGATTTAAGTCTGGATACT 21  
|\*|||||||\*|\*|  
Sbjct: 451 ATCCTAAATTCAGACCTCTCA 431  
>miR5632-3p Score: 2.5 R03G\_06322  
Query: 1 TTGGATTTAAGTCTGGATACT 21  
||||||\*|||\*|||\*||  
Sbjct: 331 AACCTAACTTCAAACCTACGA 311  
>miR5632-3p Score: 2.2 R03G\_04668  
Query: 1 TTGGATTTAAGTCTGGATACT 21  
|\*|||||||:|\*||  
Sbjct: 637 ACCCTAAATTCAGGCCTGAGA 617  
>miR5632-3p Score: 1.2 R03G\_05516  
Query: 1 TTGGATTTAAGTCTGGATACT 21  
|||||||:|\*||  
Sbjct: 460 AACCTAAATTCAGGCCTGAGA 440  
>miR5632-3p Score: 0.5 R03G\_02846  
Query: 1 TTGGATTTAAGTCTGGATACT 21  
|||||||\*|||  
Sbjct: 37 AACCTAAATTCAGACCTCTGA 17  
>miR5632-3p Score: 1.2 R03G\_03112  
Query: 1 TTGGATTTAAGTCTGGATACT 21  
|||||||:|\*||  
Sbjct: 826 AACCTAAATTCAGGCCTGAGA 806  
>miR5632-3p Score: 2.0 R03G\_03554  
Query: 1 TTGGATTTAAGTCTGGATACT 21  
||||||:||||\*||\*|||

Sbjct: 724 AACCTAAGTTCAGTCCTCTGA 704  
>miR5632-3p Score: 1.2 R03G\_03560  
Query: 1 TTGGATTTAAGTCTGGATACT 21  
|||||||:|\*||  
Sbjct: 460 AACCTAAATTCAGGCCTGAGA 440  
>miR5632-3p Score: 2.5 R03G\_03575  
Query: 1 TTGGATTTAAGTCTGGATACT 21  
||\*\*|||||||\*|  
Sbjct: 2962 AAAATAAATTCAGACCTATTA 2942  
>miR5632-3p Score: 1.0 R03G\_03603  
Query: 1 TTGGATTTAAGTCTGGATACT 21  
|||||||:|\*|||  
Sbjct: 271 AACCTAAATTCAGACTTTTGA 251  
>miR5632-3p Score: 1.0 R03G\_03624  
Query: 1 TTGGATTTAAGTCTGGATACT 21  
|||||||:|\*|||  
Sbjct: 832 AACCTAAATTCAGACTTCTGA 812  
>miR5632-3p Score: 1.2 R03G\_03791  
Query: 1 TTGGATTTAAGTCTGGATACT 21  
|||||||:|\*|||  
Sbjct: 460 AACCTAAATTCAGGCCTGAGA 440  
>miR5632-3p Score: 2.5 R03G\_03796  
Query: 1 TTGGATTTAAGTCTGGATACT 21  
||\*\*|||||||\*|  
Sbjct: 2155 AAAATAAATTCAGACCTATTA 2135  
>miR5632-3p Score: 1.2 R03G\_00240  
Query: 1 TTGGATTTAAGTCTGGATACT 21  
|||||||:|\*|||  
Sbjct: 769 AACCTAAATTCAGGCCTGAGA 749  
>miR5632-3p Score: 1.0 R03G\_00284  
Query: 1 TTGGATTTAAGTCTGGATACT 21  
|||||||:|\*|||  
Sbjct: 841 AACCTAAATTCAGACCTCCGA 821  
>miR5632-3p Score: 2.2 R03G\_00675  
Query: 1 TTGGATTTAAGTCTGGATACT 21  
|\*|||||||:|\*|||  
Sbjct: 460 ACCCTAAATTCAGGCCTGAGA 440  
>miR5632-3p Score: 0.5 R03G\_00679  
Query: 1 TTGGATTTAAGTCTGGATACT 21  
|||||||:|\*|||  
Sbjct: 1024 AACCTAAATTCAGACCTCTGA 1004  
>miR5632-3p Score: 0.5 R03G\_00700  
Query: 1 TTGGATTTAAGTCTGGATACT 21  
|||||||:|\*|||  
Sbjct: 271 AACCTAAATTCAGACCTCTGA 251

>miR5632-3p Score: 1.2 R03G\_01725  
Query: 1 TTGGATTTAAGTCTGGATACT 21  
|||||||:|\*||  
Sbjct: 460 AACCTAAATTCAGGCCTGAGA 440

>miR5632-3p Score: 1.0 R03G\_01959  
Query: 1 TTGGATTTAAGTCTGGATACT 21  
|||||||\*||  
Sbjct: 271 AACCTAAATTCAGACCTCCGA 251

>miR5632-3p Score: 2.5 R03G\_02224  
Query: 1 TTGGATTTAAGTCTGGATACT 21  
|\*||||||:||||\*|\*|  
Sbjct: 451 ATCCTAAATTCGGACCTCTCA 431

>miR5632-3p Score: 1.2 R03G\_02227  
Query: 1 TTGGATTTAAGTCTGGATACT 21  
|||||||:|\*||  
Sbjct: 826 AACCTAAATTCAGGCCTGAGA 806

>miR5632-3p Score: 1.2 R03G\_17423  
Query: 1 TTGGATTTAAGTCTGGATACT 21  
|||||||:|\*||  
Sbjct: 460 AACCTAAATTCAGGCCTGAGA 440

>miR5632-3p Score: 0.5 R03G\_17408  
Query: 1 TTGGATTTAAGTCTGGATACT 21  
|||||||\*|||  
Sbjct: 832 AACCTAAATTCAGACCTCTGA 812

>miR5632-3p Score: 1.2 R03G\_17328  
Query: 1 TTGGATTTAAGTCTGGATACT 21  
|||||||:|\*||  
Sbjct: 460 AACCTAAATTCAGGCCTGAGA 440

>miR5632-3p Score: 1.2 R03G\_17092  
Query: 1 TTGGATTTAAGTCTGGATACT 21  
|||||||:|\*||  
Sbjct: 460 AACCTAAATTCAGGCCTGAGA 440

>miR5632-3p Score: 2.0 R03G\_17154  
Query: 1 TTGGATTTAAGTCTGGATACT 21  
|\*||||||:||||\*|\*|  
Sbjct: 451 ATCCTAAATTCAGACCTCTCA 431

>miR475a-3p Score: 0.0 R03G\_16086  
Query: 1 TTAATGCCCATTCAGTTCAG 20  
|||||||  
Sbjct: 1844 AATTACGGGTAAGTGAAGTC 1825

>miR475a-3p Score: 0.0 R03G\_15802  
Query: 1 TTAATGCCCATTCAGTTCAG 20  
|||||||  
Sbjct: 3428 AATTACGGGTAAGTGAAGTC 3409

>miR475a-3p Score: 0.0 R03G\_14949

Query: 1 TTAATGCCCATTTGACTTCAG 20  
|||||  
Sbjct: 3050 AATTACGGGTAAGTCAAGTC 3031  
>miR475a-3p Score: 0.0 R03G\_12567  
Query: 1 TTAATGCCCATTTGACTTCAG 20  
|||||  
Sbjct: 3428 AATTACGGGTAAGTCAAGTC 3409  
>miR475a-3p Score: 0.0 R03G\_06775  
Query: 1 TTAATGCCCATTTGACTTCAG 20  
|||||  
Sbjct: 3428 AATTACGGGTAAGTCAAGTC 3409  
>miR475a-3p Score: 0.0 R03G\_07854  
Query: 1 TTAATGCCCATTTGACTTCAG 20  
|||||  
Sbjct: 3428 AATTACGGGTAAGTCAAGTC 3409  
>miR475a-3p Score: 0.0 R03G\_04252  
Query: 1 TTAATGCCCATTTGACTTCAG 20  
|||||  
Sbjct: 3428 AATTACGGGTAAGTCAAGTC 3409  
>miR475a-3p Score: 0.0 R03G\_04496  
Query: 1 TTAATGCCCATTTGACTTCAG 20  
|||||  
Sbjct: 3050 AATTACGGGTAAGTCAAGTC 3031  
>miR475a-3p Score: 0.0 R03G\_02364  
Query: 1 TTAATGCCCATTTGACTTCAG 20  
|||||  
Sbjct: 3428 AATTACGGGTAAGTCAAGTC 3409  
>miR475a-3p Score: 1.5 R03G\_01156  
Query: 1 TTAATGCCCATTTGACTTCAG 20  
|||||:|\*|  
Sbjct: 797 AATTATGGTTAAGTCAAGTC 778  
>miR475a-3p Score: 2.0 R03G\_16981  
Query: 1 TTAATGCCCATTTGACTTCAG 20  
|||||\*|\*|  
Sbjct: 323 AATTACGGTTAAGTCAAGTC 304  
>miR475a-3p Score: 2.0 R03G\_16987  
Query: 1 TTAATGCCCATTTGACTTCAG 20  
|||||\*|\*|  
Sbjct: 305 AATTACGGTTAAGTCAAGTC 286  
>miR8044-5p Score: 0.0 R03G\_17226  
Query: 1 TTGTCAAATGGTTGGAGATTT 22  
|||||  
Sbjct: 1864 AACAGTTTTACCAACCTCTAAA 1843  
>miR8044-5p Score: 0.0 R03G\_16815  
Query: 1 TTGTCAAATGGTTGGAGATTT 22

|||||  
Sbjct: 1864 AACAGTTTTACCAACCTCTAAA 1843  
>miR8044-5p Score: 0.0 R03G\_14795  
Query: 1 TTGTCAAATGGTTGGAGATTT 22  
|||||  
Sbjct: 1864 AACAGTTTTACCAACCTCTAAA 1843  
>miR8044-5p Score: 2.5 R03G\_11557  
Query: 1 TTGTCAAATGGTTGGAGATTT 22  
\*|:|||||:||||\*|  
Sbjct: 383 TATAGTTTTACTAACC-CTAAA 363  
>miR8044-5p Score: 2.2 R03G\_07485  
Query: 1 TTGTCAAATGGTTGGAGATTT 22  
:|||||\*||:|||||\*|  
Sbjct: 977 GACAGTTCTATCAACCTGTAAA 956  
>miR8044-5p Score: 2.2 R03G\_01429  
Query: 1 TTGTCAAATGGTTGGAGATTT 22  
:|||||\*||:|||||\*|  
Sbjct: 1565 GACAGTTCTATCAACCTGTAAA 1544  
>miR4240 Score: 2.5 R03G\_16915  
Query: 1 TCGACTGACTCGTAACATTTTC 21  
|||||\*||\*||:|||||  
Sbjct: 218 AGCTGTCTAAGTATTGTAAAG 198  
>miR4240 Score: 2.5 R03G\_16752  
Query: 1 TCGACTGACTCGTAACATTTTC 21  
|||||\*||\*||:|||||  
Sbjct: 419 AGCTGTCTAAGTATTGTAAAG 399  
>miR4240 Score: 0.0 R03G\_15274  
Query: 1 TCGACTGACTCGTAACATTTTC 21  
|||||  
Sbjct: 449 AGCTGACTGAGCATTGTAAAG 429  
>miR4240 Score: 0.0 R03G\_13916  
Query: 1 TCGACTGACTCGTAACATTTTC 21  
|||||  
Sbjct: 449 AGCTGACTGAGCATTGTAAAG 429  
>miR4240 Score: 2.5 R03G\_14292  
Query: 1 TCGACTGACTCGTAACATTTTC 21  
||\*|:|||||\*|\*|  
Sbjct: 706 AGCCGGCTGAGCATTGT-ACG 687  
>miR4240 Score: 2.5 R03G\_13144  
Query: 1 TCGACTGACTCGTAACATTTTC 21  
|||||\*||\*||:|||||  
Sbjct: 419 AGCTGTCTAAGTATTGTAAAG 399  
>miR4240 Score: 0.0 R03G\_12541  
Query: 1 TCGACTGACTCGTAACATTTTC 21  
|||||



Sbjct: 449 AGCTGACTGAGCATTGTAAAG 429  
>miR4240 Score: 0.0 R03G\_11272  
Query: 1 TCGACTGACTCGTAACATTTTC 21  
|||||

Sbjct: 449 AGCTGACTGAGCATTGTAAAG 429  
>miR4240 Score: 0.0 R03G\_11784  
Query: 1 TCGACTGACTCGTAACATTTTC 21  
|||||

Sbjct: 449 AGCTGACTGAGCATTGTAAAG 429  
>miR4240 Score: 2.5 R03G\_10860  
Query: 1 TCGACTGACTCGTAACATTTTC 21  
|||||\*||:|\*|||||

Sbjct: 449 AGCTGACTAAGTATCGTAAAG 429  
>miR4240 Score: 0.0 R03G\_09496  
Query: 1 TCGACTGACTCGTAACATTTTC 21  
|||||

Sbjct: 449 AGCTGACTGAGCATTGTAAAG 429  
>miR4240 Score: 2.5 R03G\_08111  
Query: 1 TCGACTGACTCGTAACATTTTC 21  
|||||\*||:|\*|||||

Sbjct: 449 AGCTGACTAAGTATCGTAAAG 429  
>miR4240 Score: 2.5 R03G\_05353  
Query: 1 TCGACTGACTCGTAACATTTTC 21  
||||\*||\*||:|||||

Sbjct: 419 AGCTGTCTAAGTATTGTAAAG 399  
>miR4240 Score: 2.5 R03G\_02834  
Query: 1 TCGACTGACTCGTAACATTTTC 21  
||||\*||\*||:|||||

Sbjct: 218 AGCTGTCTAAGTATTGTAAAG 198  
>miR4240 Score: 2.5 R03G\_17289  
Query: 1 TCGACTGACTCGTAACATTTTC 21  
|||||\*||:|\*|||||

Sbjct: 449 AGCTGACTAAGTATCGTAAAG 429  
>miR6443 Score: 0.0 R03G\_17204  
Query: 1 GTAAGGTCAAGATGATGAG 19  
|||||

Sbjct: 410 CATTCCAGTTCTACTACTC 392  
>miR6443 Score: 0.0 R03G\_16825  
Query: 1 GTAAGGTCAAGATGATGAG 19  
|||||

Sbjct: 347 CATTCCAGTTCTACTACTC 329  
>miR6443 Score: 0.0 R03G\_16905  
Query: 1 GTAAGGTCAAGATGATGAG 19  
|||||

Sbjct: 347 CATTCCAGTTCTACTACTC 329

>miR6443 Score: 2.5 R03G\_16737  
Query: 1 GTAAGGTCAAGATGATGAG 19  
||||\*||\*|||||||\*|  
Sbjct: 170 CATTCAAGATCTACTACGC 152

>miR6443 Score: 0.0 R03G\_16538  
Query: 1 GTAAGGTCAAGATGATGAG 19  
|||||||  
Sbjct: 425 CATTCCAGTTCTACTACTC 407

>miR6443 Score: 2.5 R03G\_16541  
Query: 1 GTAAGGTCAAGATGATGAG 19  
||||\*||\*|||||||\*|  
Sbjct: 170 CATTCAAGATCTACTACGC 152

>miR6443 Score: 2.5 R03G\_16141  
Query: 1 GTAAGGTCAAGATGATGAG 19  
||||\*||\*|||||||\*|  
Sbjct: 170 CATTCAAGATCTACTACGC 152

>miR6443 Score: 1.5 R03G\_16121  
Query: 1 GTAAGGTCAAGATGATGAG 19  
|||:|\*|||  
Sbjct: 125 CATTTCAGATCTACTACTC 107

>miR6443 Score: 0.0 R03G\_15672  
Query: 1 GTAAGGTCAAGATGATGAG 19  
|||||||  
Sbjct: 347 CATTCCAGTTCTACTACTC 329

>miR6443 Score: 2.5 R03G\_15286  
Query: 1 GTAAGGTCAAGATGATGAG 19  
||||\*||\*|||||||\*|  
Sbjct: 170 CATTCAAGATCTACTACGC 152

>miR6443 Score: 2.5 R03G\_15432  
Query: 1 GTAAGGTCAAGATGATGAG 19  
|:|||||\*||:|:|  
Sbjct: 908 CGTTCCAGTGCTGCTGCTC 890

>miR6443 Score: 0.0 R03G\_14974  
Query: 1 GTAAGGTCAAGATGATGAG 19  
|||||||  
Sbjct: 413 CATTCCAGTTCTACTACTC 395

>miR6443 Score: 2.5 R03G\_14981  
Query: 1 GTAAGGTCAAGATGATGAG 19  
||||\*||\*|||||||\*|  
Sbjct: 170 CATTCAAGATCTACTACGC 152

>miR6443 Score: 2.5 R03G\_15145  
Query: 1 GTAAGGTCAAGATGATGAG 19  
||||\*||\*|||||||\*|  
Sbjct: 170 CATTCAAGATCTACTACGC 152

>miR6443 Score: 2.5 R03G\_15170

Query: 1 GTAAGGTCAAGATGATGAG 19  
||||\*||\*||||||\*|  
Sbjct: 170 CATTCAAGATCTACTACGC 152  
>miR6443 Score: 2.5 R03G\_14715  
Query: 1 GTAAGGTCAAGATGATGAG 19  
||\*||:||||||\*|||  
Sbjct: 92 CAGTCTAGTTCTACTCCTC 74  
>miR6443 Score: 0.0 R03G\_14772  
Query: 1 GTAAGGTCAAGATGATGAG 19  
|||||||  
Sbjct: 425 CATTCCAGTTCTACTACTC 407  
>miR6443 Score: 2.5 R03G\_14784  
Query: 1 GTAAGGTCAAGATGATGAG 19  
||||\*||\*||||||\*|  
Sbjct: 170 CATTCAAGATCTACTACGC 152  
>miR6443 Score: 2.5 R03G\_13752  
Query: 1 GTAAGGTCAAGATGATGAG 19  
||||\*||\*||||||\*|  
Sbjct: 170 CATTCAAGATCTACTACGC 152  
>miR6443 Score: 0.0 R03G\_13857  
Query: 1 GTAAGGTCAAGATGATGAG 19  
|||||||  
Sbjct: 170 CATTCCAGTTCTACTACTC 152  
>miR6443 Score: 0.0 R03G\_12670  
Query: 1 GTAAGGTCAAGATGATGAG 19  
|||||||  
Sbjct: 347 CATTCCAGTTCTACTACTC 329  
>miR6443 Score: 2.5 R03G\_12785  
Query: 1 GTAAGGTCAAGATGATGAG 19  
\*|||||||:||\*||\*  
Sbjct: 575 AATTCCAGTTCTGCTTCTG 557  
>miR6443 Score: 2.5 R03G\_12950  
Query: 1 GTAAGGTCAAGATGATGAG 19  
||||\*||\*||||||\*|  
Sbjct: 170 CATTCAAGATCTACTACGC 152  
>miR6443 Score: 2.5 R03G\_13267  
Query: 1 GTAAGGTCAAGATGATGAG 19  
||||\*||\*||||||\*|  
Sbjct: 170 CATTCAAGATCTACTACGC 152  
>miR6443 Score: 0.0 R03G\_12082  
Query: 1 GTAAGGTCAAGATGATGAG 19  
|||||||  
Sbjct: 425 CATTCCAGTTCTACTACTC 407  
>miR6443 Score: 2.5 R03G\_12084  
Query: 1 GTAAGGTCAAGATGATGAG 19

```
||||*||*||||||*|
Sbjct: 170 CATTCAAGATCTACTACGC 152
>miR6443 Score: 0.5 R03G_12186
Query: 1 GTAAGGTCAAGATGATGAG 19
|||||||:|
Sbjct: 539 CATTCCAGTTCTACTGCTC 521
>miR6443 Score: 0.5 R03G_12196
Query: 1 GTAAGGTCAAGATGATGAG 19
|||||||:|
Sbjct: 461 CATTCCAGTTCTACTGCTC 443
>miR6443 Score: 0.0 R03G_12525
Query: 1 GTAAGGTCAAGATGATGAG 19
|||||||
Sbjct: 461 CATTCCAGTTCTACTACTC 443
>miR6443 Score: 0.0 R03G_11405
Query: 1 GTAAGGTCAAGATGATGAG 19
|||||||
Sbjct: 347 CATTCCAGTTCTACTACTC 329
>miR6443 Score: 2.5 R03G_11533
Query: 1 GTAAGGTCAAGATGATGAG 19
||||*||*||||||*|
Sbjct: 170 CATTCAAGATCTACTACGC 152
>miR6443 Score: 2.5 R03G_11857
Query: 1 GTAAGGTCAAGATGATGAG 19
||*|:|||||:||*|
Sbjct: 1310 CATCCTAGTTCTATTAC-C 1293
>miR6443 Score: 0.0 R03G_10515
Query: 1 GTAAGGTCAAGATGATGAG 19
|||||||
Sbjct: 461 CATTCCAGTTCTACTACTC 443
>miR6443 Score: 2.5 R03G_10797
Query: 1 GTAAGGTCAAGATGATGAG 19
||||*||*||||||*|
Sbjct: 170 CATTCAAGATCTACTACGC 152
>miR6443 Score: 2.0 R03G_09272
Query: 1 GTAAGGTCAAGATGATGAG 19
|||||||*|*|||
Sbjct: 1240 CATTCCAGTTCTTCCACTC 1222
>miR6443 Score: 2.5 R03G_09349
Query: 1 GTAAGGTCAAGATGATGAG 19
|||:|||*|||*|||
Sbjct: 785 CATTTTCAGTCTTCCACTC 767
>miR6443 Score: 2.5 R03G_09638
Query: 1 GTAAGGTCAAGATGATGAG 19
*|||||:|||||*|||*
```

Sbjct: 532 AATTCCGGTTCTAGTACTA 514  
>miR6443 Score: 2.5 R03G\_09926  
Query: 1 GTAAGGTCAAGATGATGAG 19  
||||\*||\*||||||\*|  
Sbjct: 170 CATTCAAGATCTACTACGC 152  
>miR6443 Score: 0.0 R03G\_09944  
Query: 1 GTAAGGTCAAGATGATGAG 19  
|||||||  
Sbjct: 347 CATTCCAGTTCTACTACTC 329  
>miR6443 Score: 0.0 R03G\_09952  
Query: 1 GTAAGGTCAAGATGATGAG 19  
|||||||  
Sbjct: 317 CATTCCAGTTCTACTACTC 299  
>miR6443 Score: 0.0 R03G\_09955  
Query: 1 GTAAGGTCAAGATGATGAG 19  
|||||||  
Sbjct: 224 CATTCCAGTTCTACTACTC 206  
>miR6443 Score: 2.5 R03G\_10050  
Query: 1 GTAAGGTCAAGATGATGAG 19  
||||\*||\*||||||\*|  
Sbjct: 170 CATTCAAGATCTACTACGC 152  
>miR6443 Score: 0.0 R03G\_10224  
Query: 1 GTAAGGTCAAGATGATGAG 19  
|||||||  
Sbjct: 347 CATTCCAGTTCTACTACTC 329  
>miR6443 Score: 0.0 R03G\_10226  
Query: 1 GTAAGGTCAAGATGATGAG 19  
|||||||  
Sbjct: 347 CATTCCAGTTCTACTACTC 329  
>miR6443 Score: 0.0 R03G\_08658  
Query: 1 GTAAGGTCAAGATGATGAG 19  
|||||||  
Sbjct: 347 CATTCCAGTTCTACTACTC 329  
>miR6443 Score: 2.2 R03G\_09080  
Query: 1 GTAAGGTCAAGATGATGAG 19  
||||:|\*|||:||||:  
Sbjct: 1435 CATTCTATTTCTGCTACTT 1417  
>miR6443 Score: 0.0 R03G\_09167  
Query: 1 GTAAGGTCAAGATGATGAG 19  
|||||||  
Sbjct: 347 CATTCCAGTTCTACTACTC 329  
>miR6443 Score: 0.0 R03G\_07024  
Query: 1 GTAAGGTCAAGATGATGAG 19  
|||||||  
Sbjct: 539 CATTCCAGTTCTACTACTC 521

>miR6443 Score: 2.0 R03G\_07041  
Query: 1 GTAAGGTCAAGATGATGAG 19  
||\*|||||\*|||||||  
Sbjct: 461 CAATCCAGCTCTACTACTC 443

>miR6443 Score: 0.0 R03G\_07121  
Query: 1 GTAAGGTCAAGATGATGAG 19  
|||||||  
Sbjct: 539 CATTCCAGTTCTACTACTC 521

>miR6443 Score: 1.5 R03G\_07298  
Query: 1 GTAAGGTCAAGATGATGAG 19  
|||:|||\*|||||||  
Sbjct: 170 CATTTCAGATCTACTACTC 152

>miR6443 Score: 0.0 R03G\_07302  
Query: 1 GTAAGGTCAAGATGATGAG 19  
|||||||  
Sbjct: 347 CATTCCAGTTCTACTACTC 329

>miR6443 Score: 0.0 R03G\_07689  
Query: 1 GTAAGGTCAAGATGATGAG 19  
|||||||  
Sbjct: 347 CATTCCAGTTCTACTACTC 329

>miR6443 Score: 2.5 R03G\_07723  
Query: 1 GTAAGGTCAAGATGATGAG 19  
||||\*||\*||||||\*|  
Sbjct: 170 CATTCAAGATCTACTACGC 152

>miR6443 Score: 2.5 R03G\_05522  
Query: 1 GTAAGGTCAAGATGATGAG 19  
||||\*||\*||||||\*|  
Sbjct: 536 CATTCAAGATCTACTACGC 518

>miR6443 Score: 2.5 R03G\_06384  
Query: 1 GTAAGGTCAAGATGATGAG 19  
|||:||\*|||:|||\*  
Sbjct: 668 CATTTCAATTCTATTACTA 650

>miR6443 Score: 0.5 R03G\_06424  
Query: 1 GTAAGGTCAAGATGATGAG 19  
|:|||||||  
Sbjct: 140 CGTTCCAGTTCTACTACTC 122

>miR6443 Score: 0.0 R03G\_06721  
Query: 1 GTAAGGTCAAGATGATGAG 19  
|||||||  
Sbjct: 347 CATTCCAGTTCTACTACTC 329

>miR6443 Score: 0.0 R03G\_04654  
Query: 1 GTAAGGTCAAGATGATGAG 19  
|||||||  
Sbjct: 347 CATTCCAGTTCTACTACTC 329

>miR6443 Score: 1.0 R03G\_04661

Query: 1 GTAAGGTCAAGATGATGAG 19  
|||\*|||||||  
Sbjct: 170 CATCCCAGTTCTACTACTC 152  
>miR6443 Score: 1.5 R03G\_04668  
Query: 1 GTAAGGTCAAGATGATGAG 19  
|||:|||\*|||||||  
Sbjct: 347 CATTTCAGATCTACTACTC 329  
>miR6443 Score: 0.0 R03G\_04786  
Query: 1 GTAAGGTCAAGATGATGAG 19  
|||||||  
Sbjct: 107 CATTCCAGTTCTACTACTC 89  
>miR6443 Score: 2.0 R03G\_05381  
Query: 1 GTAAGGTCAAGATGATGAG 19  
\*|||||||:||||\*\*  
Sbjct: 1009 AATTCCAGTTCTGCTACGG 991  
>miR6443 Score: 2.5 R03G\_05516  
Query: 1 GTAAGGTCAAGATGATGAG 19  
||||\*||\*||||||\*|  
Sbjct: 170 CATTCAAGATCTACTACGC 152  
>miR6443 Score: 0.0 R03G\_02700  
Query: 1 GTAAGGTCAAGATGATGAG 19  
|||||||  
Sbjct: 224 CATTCCAGTTCTACTACTC 206  
>miR6443 Score: 0.0 R03G\_02848  
Query: 1 GTAAGGTCAAGATGATGAG 19  
|||||||  
Sbjct: 170 CATTCCAGTTCTACTACTC 152  
>miR6443 Score: 0.0 R03G\_02850  
Query: 1 GTAAGGTCAAGATGATGAG 19  
|||||||  
Sbjct: 539 CATTCCAGTTCTACTACTC 521  
>miR6443 Score: 2.0 R03G\_03096  
Query: 1 GTAAGGTCAAGATGATGAG 19  
||\*|||||||\*|||  
Sbjct: 344 CAGTCCAGTTCTACTCCTC 326  
>miR6443 Score: 2.0 R03G\_03106  
Query: 1 GTAAGGTCAAGATGATGAG 19  
||\*|||||||\*|||  
Sbjct: 92 CAGTCCAGTTCTACTCCTC 74  
>miR6443 Score: 2.5 R03G\_03112  
Query: 1 GTAAGGTCAAGATGATGAG 19  
||||\*||\*||||||\*|  
Sbjct: 536 CATTCAAGATCTACTACGC 518  
>miR6443 Score: 2.0 R03G\_03450  
Query: 1 GTAAGGTCAAGATGATGAG 19

```
::||||*|||||||:
Sbjct: 1188 TGTTCCACTTCTACTACTT 1170
>miR6443 Score: 2.5 R03G_03560
Query: 1 GTAAGGTCAAGATGATGAG 19
||||*||*||||||*|
Sbjct: 170 CATTCAAGATCTACTACGC 152
>miR6443 Score: 0.0 R03G_03570
Query: 1 GTAAGGTCAAGATGATGAG 19
|||||||
Sbjct: 224 CATTCCAGTTCTACTACTC 206
>miR6443 Score: 0.0 R03G_03599
Query: 1 GTAAGGTCAAGATGATGAG 19
|||||||
Sbjct: 539 CATTCCAGTTCTACTACTC 521
>miR6443 Score: 1.5 R03G_03777
Query: 1 GTAAGGTCAAGATGATGAG 19
||||:|||*|||||||
Sbjct: 170 CATTTCAGATCTACTACTC 152
>miR6443 Score: 0.0 R03G_03785
Query: 1 GTAAGGTCAAGATGATGAG 19
|||||||
Sbjct: 152 CATTCCAGTTCTACTACTC 134
>miR6443 Score: 2.5 R03G_03791
Query: 1 GTAAGGTCAAGATGATGAG 19
||||*||*||||||*|
Sbjct: 170 CATTCAAGATCTACTACGC 152
>miR6443 Score: 0.0 R03G_03797
Query: 1 GTAAGGTCAAGATGATGAG 19
|||||||
Sbjct: 35 CATTCCAGTTCTACTACTC 17
>miR6443 Score: 0.0 R03G_04200
Query: 1 GTAAGGTCAAGATGATGAG 19
|||||||
Sbjct: 347 CATTCCAGTTCTACTACTC 329
>miR6443 Score: 2.5 R03G_00240
Query: 1 GTAAGGTCAAGATGATGAG 19
||||*||*||||||*|
Sbjct: 479 CATTCAAGATCTACTACGC 461
>miR6443 Score: 0.0 R03G_00247
Query: 1 GTAAGGTCAAGATGATGAG 19
|||||||
Sbjct: 347 CATTCCAGTTCTACTACTC 329
>miR6443 Score: 2.5 R03G_00250
Query: 1 GTAAGGTCAAGATGATGAG 19
||||*||*||||||*|
```



Sbjct: 170 CATTCAAGATCTACTACGC 152  
>miR6443 Score: 1.5 R03G\_00675  
Query: 1 GTAAGGTCAAGATGATGAG 19  
||||:||||\*|||||||  
Sbjct: 170 CATTTCAGATCTACTACTC 152  
>miR6443 Score: 1.5 R03G\_00689  
Query: 1 GTAAGGTCAAGATGATGAG 19  
||||:||||\*|||||||  
Sbjct: 38 CATTTCAGATCTACTACTC 20  
>miR6443 Score: 2.5 R03G\_01185  
Query: 1 GTAAGGTCAAGATGATGAG 19  
::||||::|||||||\*:  
Sbjct: 900 TGTTCTGGTTCTACTACAT 882  
>miR6443 Score: 0.0 R03G\_01587  
Query: 1 GTAAGGTCAAGATGATGAG 19  
|||||||  
Sbjct: 356 CATTCCAGTTCTACTACTC 338  
>miR6443 Score: 1.5 R03G\_01709  
Query: 1 GTAAGGTCAAGATGATGAG 19  
||||:||||\*|||||||  
Sbjct: 170 CATTTCAGATCTACTACTC 152  
>miR6443 Score: 2.5 R03G\_01725  
Query: 1 GTAAGGTCAAGATGATGAG 19  
||||\*||\*|||||||\*|  
Sbjct: 170 CATTCAAGATCTACTACGC 152  
>miR6443 Score: 0.0 R03G\_01925  
Query: 1 GTAAGGTCAAGATGATGAG 19  
|||||||  
Sbjct: 539 CATTCCAGTTCTACTACTC 521  
>miR6443 Score: 2.5 R03G\_02227  
Query: 1 GTAAGGTCAAGATGATGAG 19  
||||\*||\*|||||||\*|  
Sbjct: 536 CATTCAAGATCTACTACGC 518  
>miR6443 Score: 0.0 R03G\_17436  
Query: 1 GTAAGGTCAAGATGATGAG 19  
|||||||  
Sbjct: 347 CATTCCAGTTCTACTACTC 329  
>miR6443 Score: 2.5 R03G\_17423  
Query: 1 GTAAGGTCAAGATGATGAG 19  
||||\*||\*|||||||\*|  
Sbjct: 170 CATTCAAGATCTACTACGC 152  
>miR6443 Score: 0.0 R03G\_17361  
Query: 1 GTAAGGTCAAGATGATGAG 19  
|||||||  
Sbjct: 107 CATTCCAGTTCTACTACTC 89



Query: 1 TGTTAGCATGGAATAATG 18  
\*|::|:|||||:||||  
Sbjct: 345 TCGGTTGTACCTTGTTAC 328  
>miR1061-3p Score: 2.2 R03G\_05753  
Query: 1 TGTTAGCATGGAATAATG 18  
||||:|\*|||||:  
Sbjct: 127 ACAATTGTCCTTATTGT 110  
>miR1061-3p Score: 2.0 R03G\_00027  
Query: 1 TGTTAGCATGGAATAATG 18  
\*|||||:|\*|||||\*  
Sbjct: 190 TCAATCGTGTCTTATTAA 173  
>miR1061-3p Score: 2.5 R03G\_00751  
Query: 1 TGTTAGCATGGAATAATG 18  
|:|||||:|\*|||||  
Sbjct: 1123 ATAATCGTATTATATTAC 1106  
>miR1061-3p Score: 2.2 R03G\_01853  
Query: 1 TGTTAGCATGGAATAATG 18  
|||:|\*|||:|||||:  
Sbjct: 364 ACAGTCCTACTTTATTAT 347  
>miR5821 Score: 2.5 R03G\_10279  
Query: 1 TGGACGGAGACGATGGTAGAG 21  
||||:|||||||\*||\*\*|  
Sbjct: 242 ACCTGTCTCTGCTACGATGGC 222  
>miR5821 Score: 2.5 R03G\_10929  
Query: 1 TGGACGGAGACGATGGTAGAG 21  
\*|:|||||||:|\*|||  
Sbjct: 801 TCTTGCCTCTGCTGCC-TCTC 782  
>miR5821 Score: 2.5 R03G\_11069  
Query: 1 TGGACGGAGACGATGGTAGAG 21  
\*|:|||||||:|\*|||  
Sbjct: 801 CCTTGCCTCTGCTGCC-TCTC 782  
>miR5821 Score: 2.5 R03G\_05170  
Query: 1 TGGACGGAGACGATGGTAGAG 21  
\*|:|||||||:|\*|||  
Sbjct: 801 TCTTGCCTCTGCTGCC-TCTC 782  
>miR5821 Score: 2.5 R03G\_01864  
Query: 1 TGGACGGAGACGATGGTAGAG 21  
\*|:|||||||:|\*|||  
Sbjct: 801 CCTTGCCTCTGCTGCC-TCTC 782  
>miR5821 Score: 0.0 R03G\_17015  
Query: 1 TGGACGGAGACGATGGTAGAG 21  
|||||||  
Sbjct: 1042 ACCTGCCTCTGCTACCATCTC 1022  
>miR9409 Score: 2.2 R03G\_16817  
Query: 1 TTTTGCATAGTTCATTTTC 20

:|||:|\*|||\*  
Sbjct: 46 GAAATATTATCAAGTAAAAA 27  
>miR9409 Score: 2.5 R03G\_16521  
Query: 1 TTTTGCATAGTTCATTTTC 20  
\*|||\*|||\*|||  
Sbjct: 659 TAAACAGAATCAAGAAAAAG 640  
>miR9409 Score: 2.5 R03G\_16107  
Query: 1 TTTTGCATAGTTCATTTTC 20  
|||\*|:|||\*|||  
Sbjct: 1991 AAAACATTGTCAACTAAAAG 1972  
>miR9409 Score: 0.0 R03G\_15711  
Query: 1 TTTTGCATAGTTCATTTTC 20  
|||||  
Sbjct: 1642 AAAACAGTATCAAGTAAAAG 1623  
>miR9409 Score: 2.0 R03G\_14532  
Query: 1 TTTTGCATAGTTCATTTTC 20  
|:|:|:|:|:|:|\*  
Sbjct: 1633 AGAATAGTATTAAGTAAAAC 1614  
>miR9409 Score: 2.5 R03G\_14210  
Query: 1 TTTTGCATAGTTCATTTTC 20  
|:|:|:|:|:|:|\*  
Sbjct: 1027 AGAGTAGTATTAAGTAAAAC 1008  
>miR9409 Score: 2.5 R03G\_13589  
Query: 1 TTTTGCATAGTTCATTTTC 20  
|:|:|:|\*|:|:|:|\*  
Sbjct: 556 AGAACAGTTTTAAGTAAAAC 537  
>miR9409 Score: 2.5 R03G\_13624  
Query: 1 TTTTGCATAGTTCATTTTC 20  
|:|:|:|\*|:|:|:|\*  
Sbjct: 343 AGAACAGTTTTAAGTAAAAC 324  
>miR9409 Score: 2.2 R03G\_13728  
Query: 1 TTTTGCATAGTTCATTTTC 20  
:|:|:|:|:|:|:|:|:|\*|  
Sbjct: 836 GAAACGGTATCAAGTAGTTG 817  
>miR9409 Score: 0.0 R03G\_13796  
Query: 1 TTTTGCATAGTTCATTTTC 20  
|||||  
Sbjct: 1642 AAAACAGTATCAAGTAAAAG 1623  
>miR9409 Score: 2.0 R03G\_13807  
Query: 1 TTTTGCATAGTTCATTTTC 20  
|:|:|:|:|:|:|\*  
Sbjct: 895 AGAATAGTATTAAGTAAAAC 876  
>miR9409 Score: 0.0 R03G\_11521  
Query: 1 TTTTGCATAGTTCATTTTC 20  
|||||

Sbjct: 604 AAAACAGTATCAAGTAAAAG 585  
>miR9409 Score: 0.0 R03G\_09539  
Query: 1 TTTTGCATAGTTCATTTTC 20  
|||||

Sbjct: 1642 AAAACAGTATCAAGTAAAAG 1623  
>miR9409 Score: 2.2 R03G\_07873  
Query: 1 TTTTGCATAGTTCATTTTC 20  
:||||:|||||:\*\*|

Sbjct: 848 GAAACGGTATCAAGTAGTTG 829  
>miR9409 Score: 2.2 R03G\_05922  
Query: 1 TTTTGCATAGTTCATTTTC 20  
:||||:|||||:\*\*|

Sbjct: 347 GAAACGGTATCAAGTAGTTG 328  
>miR9409 Score: 2.5 R03G\_06371  
Query: 1 TTTTGCATAGTTCATTTTC 20  
|||||\*|\*|

Sbjct: 589 AAAACAGTATCAAGCGA-TG 571  
>miR9409 Score: 2.2 R03G\_04478  
Query: 1 TTTTGCATAGTTCATTTTC 20  
|:|||||\*|\*|:|\*

Sbjct: 1663 AGAACAGTATGAAGTAAGAC 1644  
>miR9409 Score: 2.2 R03G\_05273  
Query: 1 TTTTGCATAGTTCATTTTC 20  
:||||:|||||:\*\*|

Sbjct: 332 GAAACGGTATCAAGTAGTTG 313  
>miR9409 Score: 2.5 R03G\_02302  
Query: 1 TTTTGCATAGTTCATTTTC 20  
:|\*|\*|\*|\*|\*|\*|\*|\*|\*|

Sbjct: 70 GAAGAAGTATCAAGTAA-GG 52  
>miR9409 Score: 2.0 R03G\_03121  
Query: 1 TTTTGCATAGTTCATTTTC 20  
|:|\*|\*|\*|\*|\*|\*|\*|\*|\*|

Sbjct: 1633 AGAATAGTATTAAGTAAAAC 1614  
>miR9409 Score: 2.5 R03G\_00521  
Query: 1 TTTTGCATAGTTCATTT-TC 20  
||||\*|\*|\*|\*|\*|\*|\*|\*|\*|

Sbjct: 301 AAAAACTATCAAGTAAACAG 281  
>miR9409 Score: 2.5 R03G\_01204  
Query: 1 TTTTGCATAGTTCATTTTC 20  
\*|\*|\*|\*|\*|\*|\*|\*|\*|\*|

Sbjct: 106 TAAACAGTTTTAAGTAATAG 87  
>miR9409 Score: 2.0 R03G\_01426  
Query: 1 TTTTGCATAGTTCATTTTC 20  
|:|\*|\*|\*|\*|\*|\*|\*|\*|\*|

Sbjct: 895 AGAATAGTATTAAGTAAAAC 876

>miR9409 Score: 1.5 R03G\_01512  
Query: 1 TTTTGCATAGTTCATTTTC 20  
|||||\*||:|||||||  
Sbjct: 1630 AAAACAGCATTAAGTAAAAG 1611

>miR9409 Score: 2.5 R03G\_01924  
Query: 1 TTTTGCATAGTTCATTTTC 20  
|:|||||\*|:|||||||\*  
Sbjct: 1027 AGAACAGTTTTAAGTAAAAC 1008

>miR6194 Score: 0.0 R03G\_10233  
Query: 1 TAGTAGGGATCTTGACACACGAG 23  
|||||||  
Sbjct: 2164 ATCATCCCTAGAACTGTGTGCTC 2142

>miR6194 Score: 0.0 R03G\_04025  
Query: 1 TAGTAGGGATCTTGACACACGAG 23  
|||||||  
Sbjct: 2164 ATCATCCCTAGAACTGTGTGCTC 2142

>miR6194 Score: 0.0 R03G\_01744  
Query: 1 TAGTAGGGATCTTGACACACGAG 23  
|||||||  
Sbjct: 2167 ATCATCCCTAGAACTGTGTGCTC 2145

>miR5059 Score: 2.5 R03G\_00398  
Query: 1 CGATCCTGGGCAGCACCACC 20  
|\*||\*|||\*|||\*|||\*||  
Sbjct: 1583 GATAGTACCCGTCGTGGTCG 1564

>miR415 Score: 0.0 R03G\_17256  
Query: 1 AAAGGAACAGAAGCAGAAGCAG 22  
|||||||  
Sbjct: 182 TTCCTTGTCTTCGTCTTCGTC 161

>miR415 Score: 1.0 R03G\_17244  
Query: 1 AAAGGAACAGAAGCAGAAGCAG 22  
|\*|||\*|||\*|||\*|||\*|||  
Sbjct: 212 TGCCTTGTCTTCGTCTTCGTC 191

>miR415 Score: 2.5 R03G\_17245  
Query: 1 AAAGGAACAGAAGCAGAAGCAG 22  
\*||\*|||\*|||\*||\*||  
Sbjct: 35 CTTACTTGTCTTCGTCTAC-TC 15

>miR415 Score: 0.0 R03G\_17248  
Query: 1 AAAGGAACAGAAGCAGAAGCAG 22  
|||||||  
Sbjct: 188 TTCCTTGTCTTCGTCTTCGTC 167

>miR415 Score: 1.0 R03G\_17210  
Query: 1 AAAGGAACAGAAGCAGAAGCAG 22  
|\*|||\*|||\*|||\*|||  
Sbjct: 239 TGCCTTGTCTTCGTCTTCGTC 218

>miR415 Score: 1.0 R03G\_16901



||||\*||\*|:|||||||  
Sbjct: 26 TTTCATTATTTTCGTCTTCGTC 5  
>miR415 Score: 0.0 R03G\_15147  
Query: 1 AAAGGAACAGAAGCAGAAGCAG 22  
|||||||  
Sbjct: 134 TTTCCTTGTCTTCGTCTTCGTC 113  
>miR415 Score: 0.0 R03G\_14551  
Query: 1 AAAGGAACAGAAGCAGAAGCAG 22  
|||||||  
Sbjct: 158 TTTCCTTGTCTTCGTCTTCGTC 137  
>miR415 Score: 1.0 R03G\_14553  
Query: 1 AAAGGAACAGAAGCAGAAGCAG 22  
|\*|||||||  
Sbjct: 215 TGCCTTGTCTTCGTCTTCGTC 194  
>miR415 Score: 2.5 R03G\_14707  
Query: 1 AAAGGAACAGAAGCAGAAGCAG 22  
\*||\*|||||||\*||  
Sbjct: 35 CTTACTTGTCTTCGTCTAC-TC 15  
>miR415 Score: 1.0 R03G\_13452  
Query: 1 AAAGGAACAGAAGCAGAAGCAG 22  
|\*|||||||  
Sbjct: 191 TGCCTTGTCTTCGTCTTCGTC 170  
>miR415 Score: 2.5 R03G\_13710  
Query: 1 AAAGGAACAGAAGCAGAAGCAG 22  
\*||\*|||||||\*||  
Sbjct: 35 CTTACTTGTCTTCGTCTAC-TC 15  
>miR415 Score: 2.5 R03G\_13738  
Query: 1 AAAGGAACAGAAGCAGAAGCAG 22  
\*||\*|||||||\*||  
Sbjct: 35 CTTACTTGTCTTCGTCTAC-TC 15  
>miR415 Score: 1.0 R03G\_12976  
Query: 1 AAAGGAACAGAAGCAGAAGCAG 22  
|\*|||||||  
Sbjct: 218 TGCCTTGTCTTCGTCTTCGTC 197  
>miR415 Score: 0.0 R03G\_13146  
Query: 1 AAAGGAACAGAAGCAGAAGCAG 22  
|||||||  
Sbjct: 182 TTTCCTTGTCTTCGTCTTCGTC 161  
>miR415 Score: 0.0 R03G\_13272  
Query: 1 AAAGGAACAGAAGCAGAAGCAG 22  
|||||||  
Sbjct: 241 TTTCCTTGTCTTCGTCTTCGTC 220  
>miR415 Score: 2.5 R03G\_12006  
Query: 1 AAAGGAACAGAAGCAGAAGCAG 22  
\*||\*|||||||\*||



Sbjct: 35 CTTACTTGTCTTCGTCTAC-TC 15  
>miR415 Score: 1.0 R03G\_12011  
Query: 1 AAAGGAACAGAAGCAGAAGCAG 22  
|\*|||||||||||||||||||  
Sbjct: 215 TGCCTTGTCTTCGTCTTCGTC 194  
>miR415 Score: 0.0 R03G\_11236  
Query: 1 AAAGGAACAGAAGCAGAAGCAG 22  
|||||||||||||||||||  
Sbjct: 200 TTTCCTTGTCTTCGTCTTCGTC 179  
>miR415 Score: 0.0 R03G\_11537  
Query: 1 AAAGGAACAGAAGCAGAAGCAG 22  
|||||||||||||||||||  
Sbjct: 200 TTTCCTTGTCTTCGTCTTCGTC 179  
>miR415 Score: 1.0 R03G\_11543  
Query: 1 AAAGGAACAGAAGCAGAAGCAG 22  
|\*|||||||||||||||||||  
Sbjct: 215 TGCCTTGTCTTCGTCTTCGTC 194  
>miR415 Score: 0.0 R03G\_10775  
Query: 1 AAAGGAACAGAAGCAGAAGCAG 22  
|||||||||||||||||||  
Sbjct: 188 TTTCCTTGTCTTCGTCTTCGTC 167  
>miR415 Score: 0.0 R03G\_09602  
Query: 1 AAAGGAACAGAAGCAGAAGCAG 22  
|||||||||||||||||||  
Sbjct: 158 TTTCCTTGTCTTCGTCTTCGTC 137  
>miR415 Score: 0.0 R03G\_09603  
Query: 1 AAAGGAACAGAAGCAGAAGCAG 22  
|||||||||||||||||||  
Sbjct: 200 TTTCCTTGTCTTCGTCTTCGTC 179  
>miR415 Score: 0.0 R03G\_09929  
Query: 1 AAAGGAACAGAAGCAGAAGCAG 22  
|||||||||||||||||||  
Sbjct: 158 TTTCCTTGTCTTCGTCTTCGTC 137  
>miR415 Score: 0.0 R03G\_10041  
Query: 1 AAAGGAACAGAAGCAGAAGCAG 22  
|||||||||||||||||||  
Sbjct: 188 TTTCCTTGTCTTCGTCTTCGTC 167  
>miR415 Score: 1.0 R03G\_10043  
Query: 1 AAAGGAACAGAAGCAGAAGCAG 22  
|\*|||||||||||||||||||  
Sbjct: 209 TGCCTTGTCTTCGTCTTCGTC 188  
>miR415 Score: 2.5 R03G\_10043  
Query: 1 AAAGGAACAGAAGCAGAAGCAG 22  
|\*|||\*||||||||||||||\*|  
Sbjct: 161 TGCCTCGTCTTCGTCTTCGCC 140

>miR415 Score: 2.5 R03G\_10076  
Query: 1 AAAGGAACAGAAGCAGAAGCAG 22  
\*|\*|:|||||\*||  
Sbjct: 512 CTGCTTTGTCTTCGTCTTCTTC 491

>miR415 Score: 0.0 R03G\_10218  
Query: 1 AAAGGAACAGAAGCAGAAGCAG 22  
|||||  
Sbjct: 188 TTCCTTGTCTTCGTCTTCGTC 167

>miR415 Score: 0.0 R03G\_07981  
Query: 1 AAAGGAACAGAAGCAGAAGCAG 22  
|||||  
Sbjct: 158 TTCCTTGTCTTCGTCTTCGTC 137

>miR415 Score: 0.0 R03G\_09182  
Query: 1 AAAGGAACAGAAGCAGAAGCAG 22  
|||||  
Sbjct: 182 TTCCTTGTCTTCGTCTTCGTC 161

>miR415 Score: 0.0 R03G\_06730  
Query: 1 AAAGGAACAGAAGCAGAAGCAG 22  
|||||  
Sbjct: 158 TTCCTTGTCTTCGTCTTCGTC 137

>miR415 Score: 0.0 R03G\_07306  
Query: 1 AAAGGAACAGAAGCAGAAGCAG 22  
|||||  
Sbjct: 158 TTCCTTGTCTTCGTCTTCGTC 137

>miR415 Score: 1.0 R03G\_07692  
Query: 1 AAAGGAACAGAAGCAGAAGCAG 22  
|\*|||||  
Sbjct: 149 TGCCTTGTCTTCGTCTTCGTC 128

>miR415 Score: 0.0 R03G\_07696  
Query: 1 AAAGGAACAGAAGCAGAAGCAG 22  
|||||  
Sbjct: 158 TTCCTTGTCTTCGTCTTCGTC 137

>miR415 Score: 0.0 R03G\_07720  
Query: 1 AAAGGAACAGAAGCAGAAGCAG 22  
|||||  
Sbjct: 158 TTCCTTGTCTTCGTCTTCGTC 137

>miR415 Score: 0.0 R03G\_07738  
Query: 1 AAAGGAACAGAAGCAGAAGCAG 22  
|||||  
Sbjct: 200 TTCCTTGTCTTCGTCTTCGTC 179

>miR415 Score: 1.0 R03G\_04659  
Query: 1 AAAGGAACAGAAGCAGAAGCAG 22  
|\*|||||  
Sbjct: 149 TGCCTTGTCTTCGTCTTCGTC 128

>miR415 Score: 2.5 R03G\_04776

Query: 1 AAAGGAACAGAAGCAGAAGCAG 22  
|||||\*\*|||||||\*||  
Sbjct: 1427 TTCCTCTTCTTCGTCTTCCTC 1406  
>miR415 Score: 1.0 R03G\_05347

Query: 1 AAAGGAACAGAAGCAGAAGCAG 22  
|\*|||||||  
Sbjct: 215 TGCCTTGTCTTCGTCTTCGTC 194  
>miR415 Score: 0.0 R03G\_05425

Query: 1 AAAGGAACAGAAGCAGAAGCAG 22  
|||||||  
Sbjct: 188 TTCCTTGTCTTCGTCTTCGTC 167  
>miR415 Score: 0.0 R03G\_02228

Query: 1 AAAGGAACAGAAGCAGAAGCAG 22  
|||||||  
Sbjct: 158 TTCCTTGTCTTCGTCTTCGTC 137  
>miR415 Score: 1.0 R03G\_02817

Query: 1 AAAGGAACAGAAGCAGAAGCAG 22  
|\*|||||||  
Sbjct: 218 TGCCTTGTCTTCGTCTTCGTC 197  
>miR415 Score: 0.0 R03G\_03584

Query: 1 AAAGGAACAGAAGCAGAAGCAG 22  
|||||||  
Sbjct: 116 TTCCTTGTCTTCGTCTTCGTC 95  
>miR415 Score: 0.0 R03G\_04211

Query: 1 AAAGGAACAGAAGCAGAAGCAG 22  
|||||||  
Sbjct: 158 TTCCTTGTCTTCGTCTTCGTC 137  
>miR415 Score: 1.0 R03G\_00288

Query: 1 AAAGGAACAGAAGCAGAAGCAG 22  
|\*|||||||  
Sbjct: 182 TGCCTTGTCTTCGTCTTCGTC 161  
>miR415 Score: 2.2 R03G\_00874

Query: 1 AAAGGAACAGAAGCAGAAGCAG 22  
|||||\*|||||||\*:\*||  
Sbjct: 1889 TTCCTAGTCTTCGTCTAT-TC 1869  
>miR415 Score: 1.0 R03G\_01192

Query: 1 AAAGGAACAGAAGCAGAAGCAG 22  
|\*|||||||  
Sbjct: 152 TGCCTTGTCTTCGTCTTCGTC 131  
>miR415 Score: 2.5 R03G\_01196

Query: 1 AAAGGAACAGAAGCAGAAGCAG 22  
\*||\*|||||||\*|\*||  
Sbjct: 35 CTTACTTGTCTTCGTCTAC-TC 15  
>miR415 Score: 1.0 R03G\_01717

Query: 1 AAAGGAACAGAAGCAGAAGCAG 22



Sbjct: 759 AACCTGCCGACTGAACCTTG 740  
>miR5185l-3p Score: 1.5 R03G\_13447  
Query: 1 TTGGACGGTTGACTTAGAAC 20  
|||||:||||||\*|||

Sbjct: 759 AACCTGTCAACTGAACCTTG 740  
>miR5185l-3p Score: 1.5 R03G\_13706  
Query: 1 TTGGACGGTTGACTTAGAAC 20  
|||||:||||||\*|||

Sbjct: 717 AACCTGCCGACTGAACCTTG 698  
>miR5185l-3p Score: 1.0 R03G\_12013  
Query: 1 TTGGACGGTTGACTTAGAAC 20  
|||||||:||||||\*|||

Sbjct: 84 AACCTGCCAACTGAACCTTG 65  
>miR5185l-3p Score: 1.5 R03G\_12174  
Query: 1 TTGGACGGTTGACTTAGAAC 20  
|||||:||||||\*|||

Sbjct: 84 AACCTGCCGACTGAACCTTG 65  
>miR5185l-3p Score: 1.5 R03G\_12526  
Query: 1 TTGGACGGTTGACTTAGAAC 20  
|||||:||||||\*|||

Sbjct: 759 AACCTGCCGACTGAACCTTG 740  
>miR5185l-3p Score: 1.0 R03G\_11244  
Query: 1 TTGGACGGTTGACTTAGAAC 20  
|||||||:||||||\*|||

Sbjct: 759 AACCTGCCAACTGAACCTTG 740  
>miR5185l-3p Score: 1.5 R03G\_11263  
Query: 1 TTGGACGGTTGACTTAGAAC 20  
|||||:||||||\*|||

Sbjct: 84 AACCTGCCGACTGAACCTTG 65  
>miR5185l-3p Score: 1.0 R03G\_11528  
Query: 1 TTGGACGGTTGACTTAGAAC 20  
|||||||:||||||\*|||

Sbjct: 84 AACCTGCCAACTGAACCTTG 65  
>miR5185l-3p Score: 1.0 R03G\_11534  
Query: 1 TTGGACGGTTGACTTAGAAC 20  
|||||||:||||||\*|||

Sbjct: 759 AACCTGCCAACTGAACCTTG 740  
>miR5185l-3p Score: 0.0 R03G\_11948  
Query: 1 TTGGACGGTTGACTTAGAAC 20  
|||||||:|||||||

Sbjct: 759 AACCTGCCAACTGAATCTTG 740  
>miR5185l-3p Score: 1.0 R03G\_10528  
Query: 1 TTGGACGGTTGACTTAGAAC 20  
|||||||:||||||\*|||

Sbjct: 84 AACCTGCCAACTGAACCTTG 65

>miR5185l-3p Score: 1.0 R03G\_10537  
Query: 1 TTGGACGGTTGACTTAGAAC 20  
|||||\*||||  
Sbjct: 582 AACCTGCCAACTGAACCTTG 563

>miR5185l-3p Score: 1.0 R03G\_10720  
Query: 1 TTGGACGGTTGACTTAGAAC 20  
|||||\*||||  
Sbjct: 759 AACCTGCCAACTGAACCTTG 740

>miR5185l-3p Score: 1.0 R03G\_10742  
Query: 1 TTGGACGGTTGACTTAGAAC 20  
|||||\*||||  
Sbjct: 84 AACCTGCCAACTGAACCTTG 65

>miR5185l-3p Score: 0.0 R03G\_09199  
Query: 1 TTGGACGGTTGACTTAGAAC 20  
|||||\*||||  
Sbjct: 759 AACCTGCCAACTGAATCTTG 740

>miR5185l-3p Score: 0.0 R03G\_09924  
Query: 1 TTGGACGGTTGACTTAGAAC 20  
|||||\*||||  
Sbjct: 759 AACCTGCCAACTGAATCTTG 740

>miR5185l-3p Score: 1.0 R03G\_10044  
Query: 1 TTGGACGGTTGACTTAGAAC 20  
|||||\*||||  
Sbjct: 759 AACCTGCCAACTGAACCTTG 740

>miR5185l-3p Score: 1.0 R03G\_07994  
Query: 1 TTGGACGGTTGACTTAGAAC 20  
|||||\*||||  
Sbjct: 759 AACCTGCCAACTGAACCTTG 740

>miR5185l-3p Score: 2.0 R03G\_08835  
Query: 1 TTGGACGGTTGACTTAGAAC 20  
||||\*||||\*||||  
Sbjct: 69 AACCTACCAACTGAACCTTG 50

>miR5185l-3p Score: 1.0 R03G\_08848  
Query: 1 TTGGACGGTTGACTTAGAAC 20  
|||||\*||||  
Sbjct: 69 AACCTGCCAACTGAACCTTG 50

>miR5185l-3p Score: 1.0 R03G\_07119  
Query: 1 TTGGACGGTTGACTTAGAAC 20  
|||||\*||||  
Sbjct: 84 AACCTGCCAACTGAACCTTG 65

>miR5185l-3p Score: 0.0 R03G\_07295  
Query: 1 TTGGACGGTTGACTTAGAAC 20  
|||||\*||||  
Sbjct: 591 AACCTGCCAACTGAATCTTG 572

>miR5185l-3p Score: 2.5 R03G\_07465

Query: 1 TTGGACGGTTGACTTAGAA-C 20  
||||\*|||||\*||||\*|  
Sbjct: 1474 AACCTACCAACTGTATCTTAG 1454  
>miR5185l-3p Score: 1.0 R03G\_07683  
Query: 1 TTGGACGGTTGACTTAGAAC 20  
|||||||\*||||  
Sbjct: 759 AACCTGCCAACTGAACCTTG 740  
>miR5185l-3p Score: 1.0 R03G\_05916  
Query: 1 TTGGACGGTTGACTTAGAAC 20  
|||||||\*||||  
Sbjct: 759 AACCTGCCAACTGAACCTTG 740  
>miR5185l-3p Score: 1.5 R03G\_03558  
Query: 1 TTGGACGGTTGACTTAGAAC 20  
|||||:||||||\*||||  
Sbjct: 759 AACCTGTCAACTGAACCTTG 740  
>miR5185l-3p Score: 1.5 R03G\_03617  
Query: 1 TTGGACGGTTGACTTAGAAC 20  
|||||:||||||\*||||  
Sbjct: 759 AACCTGTCAACTGAACCTTG 740  
>miR5185l-3p Score: 1.0 R03G\_03987  
Query: 1 TTGGACGGTTGACTTAGAAC 20  
|||||||\*||||  
Sbjct: 759 AACCTGCCAACTGAACCTTG 740  
>miR5185l-3p Score: 1.0 R03G\_01194  
Query: 1 TTGGACGGTTGACTTAGAAC 20  
|||||||\*||||  
Sbjct: 759 AACCTGCCAACTGAACCTTG 740  
>miR5185l-3p Score: 1.0 R03G\_01313  
Query: 1 TTGGACGGTTGACTTAGAAC 20  
|||||||\*||||  
Sbjct: 759 AACCTGCCAACTGAACCTTG 740  
>miR5185l-3p Score: 0.0 R03G\_01950  
Query: 1 TTGGACGGTTGACTTAGAAC 20  
|||||||\*||||  
Sbjct: 759 AACCTGCCAACTGAATCTTG 740  
>miR5185l-3p Score: 1.0 R03G\_01951  
Query: 1 TTGGACGGTTGACTTAGAAC 20  
|||||||\*||||  
Sbjct: 759 AACCTGCCAACTGAACCTTG 740  
>miR5185l-3p Score: 1.5 R03G\_17409  
Query: 1 TTGGACGGTTGACTTAGAAC 20

|||||||:|||||\*||||  
Sbjct: 759 AACCTGCCGACTGAACCTTG 740  
>miR6274b-3p Score: 0.0 R03G\_15390  
Query: 1 TTGTGGTAGACCGAAAATAG 20  
|||||||  
Sbjct: 543 AACACCATCTGGCTTTTATC 524  
>miR6274b-3p Score: 0.0 R03G\_13001  
Query: 1 TTGTGGTAGACCGAAAATAG 20  
|||||||  
Sbjct: 2253 AACACCATCTGGCTTTTATC 2234  
>miR6274b-3p Score: 1.0 R03G\_10503  
Query: 1 TTGTGGTAGACCGAAAATAG 20  
|||||||\*|||||  
Sbjct: 189 AACACCATCTGGCCTTTATC 170  
>miR6274b-3p Score: 0.0 R03G\_06596  
Query: 1 TTGTGGTAGACCGAAAATAG 20  
|||||||  
Sbjct: 2253 AACACCATCTGGCTTTTATC 2234  
>miR6274b-3p Score: 0.0 R03G\_03002  
Query: 1 TTGTGGTAGACCGAAAATAG 20  
|||||||  
Sbjct: 2253 AACACCATCTGGCTTTTATC 2234  
>miR6274b-3p Score: 2.5 R03G\_02145  
Query: 1 TTGTGGTAGACCGAAAATAG 20  
|||||||\*||\*||||\*  
Sbjct: 135 AACACCATCTAGCCTTTATG 116  
>miR8126-3p Score: 2.5 R03G\_16842  
Query: 1 TTCAGTATATTTGTCATCAGAG 22  
||||\*||||:||||:|  
Sbjct: 258 AAGTCTTATAAGTAGTAGTTTT 237  
>miR8126-3p Score: 2.0 R03G\_10563  
Query: 1 TTCAGTATATTTGTCATCAGAG 22  
|||||||\*|:|||||||\*  
Sbjct: 24 AAGTCATATTAGCAGTAGTCTG 3  
>miR8126-3p Score: 2.5 R03G\_10119  
Query: 1 TTCAGTATATTTGTCATCAGAG 22  
||||:|\*|:|:|||||||  
Sbjct: 84 AAGTCGTACAGATAGTAGTCTC 63  
>miR8126-3p Score: 2.5 R03G\_06496  
Query: 1 TTCAGTATATTTGTCATCAGAG 22  
|||||||:|\*|||||\*\*|  
Sbjct: 1602 AAGTCATATGAAAAGTAGT-AC 1582  
>miR1428b Score: 0.2 R03G\_13882  
Query: 1 TATAAGAAATGCCATGAATTCT 22  
|||||||:||||



Sbjct: 654 ATATTCTTTACGGTACTTGAGA 633  
>miR1428b Score: 0.2 R03G\_13730  
Query: 1 TATAAGAAATGCCATGAATTCT 22  
|||||||:||||  
Sbjct: 417 ATATTCTTTACGGTACTTGAGA 396  
>miR1428b Score: 2.2 R03G\_08084  
Query: 1 TATAAGAAATGCCATGAATTCT 22  
|||||\*||||\*|||||||:  
Sbjct: 180 ATATTCCTTACTGTACTTAAGG 159  
>miR1428b Score: 0.2 R03G\_05325  
Query: 1 TATAAGAAATGCCATGAATTCT 22  
|||||||:||||  
Sbjct: 654 ATATTCTTTACGGTACTTGAGA 633  
>miR1428b Score: 0.0 R03G\_03721  
Query: 1 TATAAGAAATGCCATGAATTCT 22  
|||||||:||||  
Sbjct: 654 ATATTCTTTACGGTACTTAAGA 633  
>miR1428b Score: 0.5 R03G\_00141  
Query: 1 TATAAGAAATGCCATGAATTCT 22  
|||||||:|||||||  
Sbjct: 654 ATATTCTTTATGGTACTTAAGA 633  
>miR1428b Score: 0.2 R03G\_00809  
Query: 1 TATAAGAAATGCCATGAATTCT 22  
|||||||:|||||||  
Sbjct: 654 ATATTCTTTACGGTACTTGAGA 633  
>miR2111-3p Score: 2.5 R03G\_06346  
Query: 1 GAAGTCAGGTGGGATTACC 19  
|||\*|||:|||\*|||  
Sbjct: 276 CTTGAGTCTACCCAAATGG 258  
>miR825-3p Score: 1.5 R03G\_17249  
Query: 1 TGGTCTCGATAAGGTGCATTAAC 23  
|||||||\*|||||||\*|  
Sbjct: 515 ACCAGAGCTTTCCACGTAATAG 493  
>miR825-3p Score: 0.5 R03G\_14979  
Query: 1 TGGTCTCGATAAGGTGCATTAAC 23  
|||||||\*|||||||\*|  
Sbjct: 515 ACCAGAGCTATTCCACGTAATAG 493  
>miR825-3p Score: 0.0 R03G\_14363  
Query: 1 TGGTCTCGATAAGGTGCATTAAC 23  
|||||||:|||||||  
Sbjct: 473 ACCAGAGCTATTCCACGTAATTG 451  
>miR825-3p Score: 0.5 R03G\_13741  
Query: 1 TGGTCTCGATAAGGTGCATTAAC 23  
|||||||\*|||||||\*|  
Sbjct: 515 ACCAGAGCTATTCCACGTAATAG 493

>miR825-3p Score: 1.5 R03G\_13755  
Query: 1 TGGTCTCGATAAGGTGCATTAAC 23  
|||||\*||||\*|  
Sbjct: 515 ACCAGAGCTATTCCAAGTAATAG 493

>miR825-3p Score: 0.5 R03G\_13863  
Query: 1 TGGTCTCGATAAGGTGCATTAAC 23  
|||||\*|  
Sbjct: 215 ACCAGAGCTATTCCACGTAATAG 193

>miR825-3p Score: 0.5 R03G\_13270  
Query: 1 TGGTCTCGATAAGGTGCATTAAC 23  
|||||\*|  
Sbjct: 515 ACCAGAGCTATTCCACGTAATAG 493

>miR825-3p Score: 0.5 R03G\_10774  
Query: 1 TGGTCTCGATAAGGTGCATTAAC 23  
|||||\*|  
Sbjct: 482 ACCAGAGCTATTCCACGTAATAG 460

>miR825-3p Score: 0.5 R03G\_08849  
Query: 1 TGGTCTCGATAAGGTGCATTAAC 23  
|||||\*|  
Sbjct: 515 ACCAGAGCTATTCCACGTAATAG 493

>miR825-3p Score: 0.5 R03G\_05936  
Query: 1 TGGTCTCGATAAGGTGCATTAAC 23  
|||||\*|  
Sbjct: 515 ACCAGAGCTATTCCACGTAATAG 493

>miR825-3p Score: 1.0 R03G\_05420  
Query: 1 TGGTCTCGATAAGGTGCATTAAC 23  
|||||\*\*|  
Sbjct: 376 ACCAGAGCTATTCCACGTAAAGG 354

>miR825-3p Score: 0.8 R03G\_17276  
Query: 1 TGGTCTCGATAAGGTGCATTAAC 23  
:|||||\*|  
Sbjct: 605 GCCAGAGCTATTCCACGTAATAG 583

>miR5566 Score: 2.5 R03G\_07176  
Query: 1 TACATCACCTCCCTGTCTGT 20  
\*|||:|||||\*||||\*|  
Sbjct: 192 TTGTGGTGGAGGTACAGA-A 174

>miR5081 Score: 1.8 R03G\_00403  
Query: 1 TGAATTTGTAAAATTGATACT 21  
|||||:|||||\*|\*  
Sbjct: 4249 ACTTAAATATTTTAACTG-GC 4230

>miR5081 Score: 2.0 R03G\_01688  
Query: 1 TGAATTTGTAAAATTGATACT 21  
:|||\*|||||:|  
Sbjct: 1317 GCTTGCACATTTTAACTATGG 1297

>miR6459a-3p Score: 0.0 R03G\_16376

Query: 1 TTGATTTGGGCTTGAATTGA 20  
|||||  
Sbjct: 1045 AACTAAACCCGAACTTAACT 1026  
>miR6459a-3p Score: 2.5 R03G\_15761  
Query: 1 TTGATTTGGGCTTGAATTGA 20  
\*|||||:|||||\*|||\*  
Sbjct: 166 TACTAAATCCGAACTAAACA 147  
>miR6459a-3p Score: 0.0 R03G\_15573  
Query: 1 TTGATTTGGGCTTGAATTGA 20  
|||||  
Sbjct: 1120 AACTAAACCCGAACTTAACT 1101  
>miR6459a-3p Score: 1.5 R03G\_13849  
Query: 1 TTGATTTGGGCTTGAATTGA 20  
|||:|\*|||||  
Sbjct: 1120 AACTGAAGCCGAACTTAACT 1101  
>miR6459a-3p Score: 2.5 R03G\_12505  
Query: 1 TTGATTTGGGCTTGAATTGA 20  
|||||\*|:|||||\*|||||  
Sbjct: 567 AACTAACCTCGAACATAACT 548  
>miR6459a-3p Score: 2.5 R03G\_12506  
Query: 1 TTGATTTGGGCTTGAATTGA 20  
|||||\*|:|||||\*|||||  
Sbjct: 567 AACTAACCTCGAACATAACT 548  
>miR6459a-3p Score: 1.5 R03G\_10420  
Query: 1 TTGATTTGGGCTTGAATTGA 20  
|||:|\*|||||  
Sbjct: 1120 AACTGAAGCCGAACTTAACT 1101  
>miR6459a-3p Score: 0.0 R03G\_10991  
Query: 1 TTGATTTGGGCTTGAATTGA 20  
|||||  
Sbjct: 1120 AACTAAACCCGAACTTAACT 1101  
>miR6459a-3p Score: 2.5 R03G\_09502  
Query: 1 TTGATTTGGGCTTGAATTGA 20  
|||||\*||||\*|||||\*||  
Sbjct: 311 AACTATACCCCAACTTACCT 292  
>miR6459a-3p Score: 2.5 R03G\_10202  
Query: 1 TTGATTTGGGCTTGAATTGA 20  
||||\*|||||:|\*|||||  
Sbjct: 820 AACTTAACCCGAGATTAACT 801  
>miR6459a-3p Score: 2.5 R03G\_07372  
Query: 1 TTGATTTGGGCTTGAATT-GA 20  
|||||\*||||\*|||\*||  
Sbjct: 777 AACTAAACGCGAACATAAACT 757  
>miR6459a-3p Score: 1.5 R03G\_05865  
Query: 1 TTGATTTGGGCTTGAATTGA 20

||||:|\*| |||||  
Sbjct: 1120 AACTGAAGCCGA ACTTAACT 1101  
>miR6459a-3p Score: 2.5 R03G\_05991  
Query: 1 TTGATTTGGGCTTGAATTGA 20  
|\*| |||||\*|  
Sbjct: 980 ACGTAAACCCGA ACTTA-CT 962  
>miR6459a-3p Score: 0.0 R03G\_06502  
Query: 1 TTGATTTGGGCTTGAATTGA 20  
|||||  
Sbjct: 1120 AACTAAACCCGA ACTTAACT 1101  
>miR6459a-3p Score: 1.0 R03G\_04662  
Query: 1 TTGATTTGGGCTTGAATTGA 20  
||||:|:| |||||  
Sbjct: 972 AACTGAATCCGA ACTTAACT 953  
>miR6459a-3p Score: 2.2 R03G\_04718  
Query: 1 TTGATTTGGGCTTGAATTGA 20  
||||\*|||\*| ||||:|  
Sbjct: 611 AACTACACCCTA ACTTAGCT 592  
>miR6459a-3p Score: 0.0 R03G\_02708  
Query: 1 TTGATTTGGGCTTGAATTGA 20  
|||||  
Sbjct: 853 AACTAAACCCGA ACTTAACT 834  
>miR6459a-3p Score: 0.0 R03G\_02966  
Query: 1 TTGATTTGGGCTTGAATTGA 20  
|||||  
Sbjct: 391 AACTAAACCCGA ACTTAACT 372  
>miR6459a-3p Score: 1.5 R03G\_03749  
Query: 1 TTGATTTGGGCTTGAATTGA 20  
||||:|\*| |||||  
Sbjct: 1120 AACTGAAGCCGA ACTTAACT 1101  
>miR6459a-3p Score: 1.5 R03G\_00273  
Query: 1 TTGATTTGGGCTTGAATTGA 20  
||||\*| |||||\*|  
Sbjct: 807 AACTATACCCGA ACTTA-CT 789  
>miR6459a-3p Score: 1.0 R03G\_01056  
Query: 1 TTGATTTGGGCTTGAATTGA 20  
||||:|:| |||||  
Sbjct: 1027 AACTGAATCCGA ACTTAACT 1008  
>miR6459a-3p Score: 2.0 R03G\_01464  
Query: 1 TTGATTTGGGCTTGAATTGA 20  
\*|\*| |||||\*|  
Sbjct: 1182 TAATAAACCCGA ACTTAACC 1163  
>miR6459a-3p Score: 2.2 R03G\_01540  
Query: 1 TTGATTTGGGCTTGAATTGA 20  
|\*|\*| |||||:|





Query: 1 TACTTCTCTGTCTTGGTAT 19  
\*\*|||||\*|||||  
Sbjct: 721 TAGAAGAGAAAGAACCATA 703  
>miR9492 Score: 2.2 R03G\_12555  
Query: 1 TACTTCTCTGTCTTGGTAT 19  
|||||\*||\*|||:  
Sbjct: 1464 ATGAAGAGCCACAACCATG 1446  
>miR9492 Score: 2.2 R03G\_10607  
Query: 1 TACTTCTCTGTCTTGGTAT 19  
||\*|||||\*|:  
Sbjct: 3173 ATAAAGAGACAGAACC-TG 3156  
>miR9492 Score: 2.5 R03G\_10873  
Query: 1 TACTTCTCTGTCTTGGTAT 19  
|||:||||\*|\*|||\*|  
Sbjct: 321 ATGGAGAGAAGGAACCA-A 304  
>miR9492 Score: 1.8 R03G\_09359  
Query: 1 TACTTCTCTGTCTTGGTAT 19  
:\*|||||\*|  
Sbjct: 1853 GAGAAGAGACAGAACCAGA 1835  
>miR9492 Score: 2.5 R03G\_10052  
Query: 1 TACTTCTCTGTCTTGGTAT 19  
|||:||||\*|\*|||\*|  
Sbjct: 321 ATGGAGAGAAGGAACCA-A 304  
>miR9492 Score: 2.5 R03G\_07740  
Query: 1 TACTTCTCTGTCTTGGTAT 19  
|||:||||\*|\*|||\*|  
Sbjct: 321 ATGGAGAGAAGGAACCA-A 304  
>miR9492 Score: 2.0 R03G\_06411  
Query: 1 TACTTCTCTGTCTTGGTAT 19  
||\*|||||:||||:|  
Sbjct: 958 ATAAAGAGACGGAACCGTA 940  
>miR9492 Score: 2.5 R03G\_04538  
Query: 1 TACTTCTCTGTCTTGGTAT 19  
||||\*||:||||:|\*|  
Sbjct: 1548 ATGAACAGGCAGAACTACA 1530  
>miR9492 Score: 2.5 R03G\_02575  
Query: 1 TACTTCTCTGTCTTGGTAT 19  
\*||||\*|||||:|:|  
Sbjct: 500 TTGAAAAGACAGAGCTATA 482  
>miR9492 Score: 2.5 R03G\_03336  
Query: 1 TACTTCTCTGTCTTGGTAT 19  
||||\*||\*|||||:|  
Sbjct: 973 ATGACGACACAGAACCGTA 955  
>miR9492 Score: 2.0 R03G\_03783  
Query: 1 TACTTCTCTGTCTTGGTAT 19

||\*|||||||:|||||:||  
Sbjct: 958 ATAAAGAGACGGAACCGTA 940  
>miR9492 Score: 2.5 R03G\_00668  
Query: 1 TACTTCTCTGTCTTGGTAT 19  
\*||\*|||||||:||:||||  
Sbjct: 189 CTAAAGAGACAGGACTATA 171  
>miR9492 Score: 2.5 R03G\_01616  
Query: 1 TACTTCTCTGTCTTGGTAT 19  
|||:|||||\*:|||||\*|  
Sbjct: 321 ATGGAGAGAAGGAACCA-A 304  
>miR9492 Score: 2.0 R03G\_17372  
Query: 1 TACTTCTCTGTCTTGGTAT 19  
||\*|||||||:|||||:||  
Sbjct: 958 ATAAAGAGACGGAACCGTA 940  
>miR9492 Score: 2.0 R03G\_17309  
Query: 1 TACTTCTCTGTCTTGGTAT 19  
||\*|||||||:|||||:||  
Sbjct: 958 ATAAAGAGACGGAACCGTA 940  
>miR9492 Score: 2.0 R03G\_17311  
Query: 1 TACTTCTCTGTCTTGGTAT 19  
||\*|||||||:|||||:||  
Sbjct: 958 ATAAAGAGACGGAACCGTA 940  
>miR7542 Score: 2.5 R03G\_16171  
Query: 1 TGTTGCGTTCATAGATGGTA 20  
|||||||\*||\*||\*||  
Sbjct: 4270 ACAACGCAAGTTTCCAC-AT 4252  
>miR7542 Score: 2.5 R03G\_16285  
Query: 1 TGTTGCGTTCATAGATGGTA 20  
||:|||:|||||||\*||\*|  
Sbjct: 72 ACGACGTAAGTATCTAGCTT 53  
>miR7542 Score: 2.5 R03G\_16050  
Query: 1 TGTTGCGTTCATAGATGGTA 20  
||\*||\*|||||||\*||\*|  
Sbjct: 1669 ACTACCCAAGTATCTACCTT 1650  
>miR7542 Score: 2.5 R03G\_13406  
Query: 1 TGTTGCGTTCATAGATGGTA 20  
:||||\*|||||||::|:|  
Sbjct: 613 GCAACTCAAGTATCTGTCGT 594  
>miR7542 Score: 2.5 R03G\_13422  
Query: 1 TGTTGCGTTCATAGATGGTA 20  
:||||\*|||||||::|:|  
Sbjct: 637 GCAACTCAAGTATCTGTCGT 618  
>miR7542 Score: 2.5 R03G\_12721  
Query: 1 TGTTGCGTTCATAGATGGTA 20  
||:|||:|||||||\*||\*



Sbjct: 57 ACGACGTAAGTATCTATAAA 38  
>miR7542 Score: 2.5 R03G\_12788  
Query: 1 TGTTGCGTTCATAGATGGTA 20  
|:|||||\*||\*||  
Sbjct: 366 ATAACGCAAGTATCAGC-AT 348  
>miR7542 Score: 2.5 R03G\_12316  
Query: 1 TGTTGCGTTCATAGATGGTA 20  
:||||\*|||||:|:|  
Sbjct: 613 GCAACTCAAGTATCTGTCGT 594  
>miR7542 Score: 2.5 R03G\_05240  
Query: 1 TGTTGCGTTCATAGATGGTA 20  
:|||\*|||||:|:|  
Sbjct: 613 GCAATTCAAGTATCTGCCGT 594  
>miR166h-3p Score: 2.5 R03G\_12495  
Query: 1 TCGGACCAGGCTTCATTC-CC 20  
||||\*||\*|||||\*||  
Sbjct: 644 AGCCGGTCCGAAGTAAGTGG 624  
>miR159a Score: 2.5 R03G\_16775  
Query: 1 TTTGGATTGAAGGGAGCTCT 20  
|||||||:|\*|||:|\*|  
Sbjct: 844 AAACCTAATGTCCCTTGA-A 826  
>miR159a Score: 2.5 R03G\_14108  
Query: 1 TTTGGATTGAAGGGAGCTCT 20  
|||:|:|:|||||:||\*||  
Sbjct: 185 AAATTTAGCTTCCTTCG-GA 167  
>miR159a Score: 2.5 R03G\_13093  
Query: 1 TTTGGATTGAAGGGAGCTCT 20  
\*\*|||||:|||||\*|  
Sbjct: 311 TTACCTAATTTCCCTCGA-A 293  
>miR159a Score: 2.5 R03G\_10905  
Query: 1 TTTGGATTGAAGGGAGCTCT 20  
||||\*|||||:|||||\*\*  
Sbjct: 569 AAACCAAACCTTCCTCGATT 550  
>miR159a Score: 2.5 R03G\_08331  
Query: 1 TTTGGATTGAAGGGAGCTCT 20  
\*|||\*|||||:|||||  
Sbjct: 123 TAACTAACTTCTCTCGAGA 104  
>miR159a Score: 2.5 R03G\_02808  
Query: 1 TTTGGATTGAAGGGAGCTCT 20  
|||||||:|:|:|||||\*|  
Sbjct: 41 AAACCTAGTTTTCCCTCGTCA 22  
>miR4244 Score: 1.0 R03G\_13029  
Query: 1 TAGTTGTTCCCTGGAGATGTG 20  
|||||\*|||||  
Sbjct: 174 ATCAACAAGGACCTCAACAC 155

>miR4244 Score: 2.2 R03G\_12482  
Query: 1 TAGTTGTTCTGGAGATG-TG 20  
|\*|||||||:|\*||  
Sbjct: 637 ACCAACAAGGACCTTTATTAC 617  
>miR4244 Score: 1.5 R03G\_12568  
Query: 1 TAGTTGTTCTGGAGATGTG 20  
|||||||:|\*|||  
Sbjct: 483 ATCAACAAGGACTTCCACAC 464  
>miR4244 Score: 1.2 R03G\_11695  
Query: 1 TAGTTGTTCTGGAGATGTG 20  
|||||||\*|:|  
Sbjct: 240 ATCAACAAGGACCTCCATAC 221  
>miR4244 Score: 2.5 R03G\_05564  
Query: 1 TAGTTGTTCTGGAGATGTG 20  
||\*|:||||\*|||||  
Sbjct: 721 ATCCATAAGGACATCTACAC 702  
>miR4244 Score: 2.2 R03G\_04377  
Query: 1 TAGTTGTTCTGGAGATGTG 20  
:||||\*|||||:||||\*  
Sbjct: 570 GTCAAGAAGGACTTCTACAA 551  
>miR4244 Score: 0.5 R03G\_04497  
Query: 1 TAGTTGTTCTGGAGATGTG 20  
||:|||||||  
Sbjct: 240 ATTAACAAGGACCTCTACAC 221  
>miR4244 Score: 2.5 R03G\_05311  
Query: 1 TAGTTGTTCTGGAGATGTG 20  
||\*|:|||||:||||\*|  
Sbjct: 306 ATAAGCAAGGACTTCTA-AC 288  
>miR4244 Score: 1.0 R03G\_02365  
Query: 1 TAGTTGTTCTGGAGATGTG 20  
|||||||\*|||  
Sbjct: 240 ATCAACAAGGACCTCCACAC 221  
>miR4244 Score: 2.5 R03G\_03106  
Query: 1 TAGTTGTTCTGGAGATGTG 20  
:|||||||:|\*||\*|:  
Sbjct: 204 GTCAACAAGGACTGCTA-AT 186  
>miR4244 Score: 1.0 R03G\_16979  
Query: 1 TAGTTGTTCTGGAGATGTG 20  
|||||||\*|||  
Sbjct: 90 ATCAACAAGGACCTCCACAC 71  
>miR2595 Score: 2.5 R03G\_16060  
Query: 1 TACATTTCTACTTCTCTGTCT 21  
\*|||||||\*|\*|\*|  
Sbjct: 38 TTGTAAAGATGAAGAAAAACA 18  
>miR2595 Score: 0.0 R03G\_15743

Query: 1 TACATTTCTACTTCTCTGTCT 21  
|||||  
Sbjct: 966 ATGTAAAGATGAAGAGACAGA 946  
>miR6148b Score: 2.5 R03G\_17170  
Query: 1 TCTGTTATGTTTGTCCA 18  
|||\*:|||\*||  
Sbjct: 74 AGAAGATACAAACAAAGT 57  
>miR6148b Score: 2.0 R03G\_13408  
Query: 1 TCTGTTATGTTTGTCCA 18  
|||||:|\*|  
Sbjct: 60 AGACAATACAAACGGG-T 44  
>miR6148b Score: 2.5 R03G\_12835  
Query: 1 TCTGTTATGTTTGTCCA 18  
\*|||\*|||\*|||  
Sbjct: 1844 TGACCATAGAAACAAGGT 1827  
>miR6148b Score: 2.5 R03G\_12527  
Query: 1 TCTGTTATGTTTGTCCA 18  
|||\*:|||\*||  
Sbjct: 74 AGAAGATACAAACAAAGT 57  
>miR6148b Score: 2.5 R03G\_11902  
Query: 1 TCTGTTATGTTTGTCCA 18  
\*|||\*|||\*|||  
Sbjct: 132 TGACACTACAAACATGGT 115  
>miR6148b Score: 2.5 R03G\_10494  
Query: 1 TCTGTTATGTTTGTCCA 18  
|\*|||:|\*|||  
Sbjct: 254 AAACAATATAAACAACGT 237  
>miR6148b Score: 2.5 R03G\_09803  
Query: 1 TCTGTTATGTTTGTCCA 18  
|||||:|\*|||\*|  
Sbjct: 1014 AGACAATATAAACAAT-T 998  
>miR6148b Score: 2.5 R03G\_09920  
Query: 1 TCTGTTATGTTTGTCCA 18  
|||\*:|||\*||  
Sbjct: 74 AGAAGATACAAACAAAGT 57  
>miR6148b Score: 2.2 R03G\_10057  
Query: 1 TCTGTTATGTTTGTCCA 18  
:||||\*|||\*|||  
Sbjct: 1255 GGACAAAAAACAAGGT 1238  
>miR6148b Score: 2.5 R03G\_08323  
Query: 1 TCTGTTATGTTTGTCCA 18  
|\*|||\*|||\*|||\*|  
Sbjct: 642 ACACAATACAAACAAGAA 625  
>miR6148b Score: 2.5 R03G\_06478  
Query: 1 TCTGTTATGTTTGTCCA 18

\*|||||\*||:||||||\*  
Sbjct: 262 TGACAAAACGAACAAGGA 245  
>miR6148b Score: 2.5 R03G\_06500  
Query: 1 TCTGTTATGTTTGTCCA 18  
||:|\*|:||||:||||  
Sbjct: 32 AGATATTGCAAATAAGGT 15  
>miR6148b Score: 2.2 R03G\_06693  
Query: 1 TCTGTTATGTTTGTCCA 18  
:|||||||\*|\*||  
Sbjct: 83 GGACAATACAAACCATGT 66  
>miR6148b Score: 2.5 R03G\_05185  
Query: 1 TCTGTTATGTTTGTCCA 18  
|||||\*||:|||||\*|  
Sbjct: 1039 AGACAAGACGAACAAG-T 1023  
>miR6148b Score: 2.5 R03G\_05406  
Query: 1 TCTGTTATGTTTGTCCA 18  
||||:|\*||:||||  
Sbjct: 234 AGACAGTAGAAGTAAGGT 217  
>miR6148b Score: 2.5 R03G\_05519  
Query: 1 TCTGTTATGTTTGTCCA 18  
||\*|:|||||||\*||  
Sbjct: 74 AGAAGATACAAACAAAGT 57  
>miR6148b Score: 2.5 R03G\_03032  
Query: 1 TCTGTTATGTTTGTCCA 18  
||\*|:||:|||||||\*  
Sbjct: 1988 AGAAGATATAAACAAGGA 1971  
>miR6148b Score: 2.0 R03G\_03392  
Query: 1 TCTGTTATGTTTGTCCA 18  
||:|\*||||||||:|||  
Sbjct: 225 AGGCTATACAAACAGGGT 208  
>miR6148b Score: 2.5 R03G\_03474  
Query: 1 TCTGTTATGTTTGTCCA 18  
|||||||:||\*\*|  
Sbjct: 467 AGACAATACAAATAAC-T 451  
>miR6148b Score: 2.5 R03G\_00076  
Query: 1 TCTGTTATGTTTGTCCA 18  
\*\*|||||||\*|\*|||  
Sbjct: 348 TAACAATACACACAAGGT 331  
>miR6148b Score: 2.5 R03G\_00104  
Query: 1 TCTGTTATGTTTGTCCA 18  
\*\*|||||||\*|\*|||  
Sbjct: 348 TAACAATACACACAAGGT 331  
>miR6148b Score: 2.5 R03G\_00837  
Query: 1 TCTGTTATGTTTGTCCA 18  
\*|||||\*|\*||\*||\*|

Sbjct: 1410 CGACAACACAAACAAGTT 1393  
>miR6148b Score: 2.5 R03G\_00940  
Query: 1 TCTGTTATGTTTGTCCA 18  
||:|:|\*|:|:|

Sbjct: 699 AGGCAGTACTAACAGGGT 682  
>miR6148b Score: 2.5 R03G\_01252  
Query: 1 TCTGTTATGTTTGTCCA 18  
||:|\*|:|:|\*|

Sbjct: 540 AGGCCATATAAACAAGGA 523  
>miR6148b Score: 2.5 R03G\_01450  
Query: 1 TCTGTTATGTTTGTCCA 18  
|:|\*|:|:|\*|

Sbjct: 788 AGACAATATGGAGAAGGT 771  
>miR6148b Score: 2.5 R03G\_02202  
Query: 1 TCTGTTATGTTTGTCCA 18  
\*|\*|\*|\*|\*|\*|\*|\*|\*|\*|

Sbjct: 2089 CGAGAACACAAACAAGGT 2072  
>miR1425-5p Score: 1.5 R03G\_17222  
Query: 1 TACTGATCATCCTTGCTGCT 20  
|:|\*|:|:|\*|

Sbjct: 386 ATGACTAGTAGGGAAGACGA 367  
>miR1425-5p Score: 0.0 R03G\_16719  
Query: 1 TACTGATCATCCTTGCTGCT 20  
|:|\*|:|:|\*|

Sbjct: 194 ATGACTAGTAGGAACGACGA 175  
>miR1425-5p Score: 0.0 R03G\_16727  
Query: 1 TACTGATCATCCTTGCTGCT 20  
|:|\*|:|:|\*|

Sbjct: 194 ATGACTAGTAGGAACGACGA 175  
>miR1425-5p Score: 0.5 R03G\_16550  
Query: 1 TACTGATCATCCTTGCTGCT 20  
|:|\*|:|:|\*|

Sbjct: 305 ATGACTAGTAGGGACGACGA 286  
>miR1425-5p Score: 1.5 R03G\_15583  
Query: 1 TACTGATCATCCTTGCTGCT 20  
|:|\*|:|:|\*|

Sbjct: 59 ATGACTAGTAGCGACGACGA 40  
>miR1425-5p Score: 0.5 R03G\_13919  
Query: 1 TACTGATCATCCTTGCTGCT 20  
|:|\*|:|:|\*|

Sbjct: 386 ATGACTAGTAGGGACGACGA 367  
>miR1425-5p Score: 0.5 R03G\_13743  
Query: 1 TACTGATCATCCTTGCTGCT 20  
|:|\*|:|:|\*|

Sbjct: 194 ATGACTAGTAGGGACGACGA 175

>miR1425-5p Score: 1.0 R03G\_12678  
Query: 1 TACTGATCATCCTTGCTGCT 20  
|||||||:||||\*|  
Sbjct: 386 ATGACTAGTAGGGACGACAA 367

>miR1425-5p Score: 0.5 R03G\_13286  
Query: 1 TACTGATCATCCTTGCTGCT 20  
|||||||:|||||  
Sbjct: 386 ATGACTAGTAGGGACGACGA 367

>miR1425-5p Score: 1.5 R03G\_12166  
Query: 1 TACTGATCATCCTTGCTGCT 20  
|||||||\*|:|||||  
Sbjct: 194 ATGACTAGTAGCGACGACGA 175

>miR1425-5p Score: 1.5 R03G\_12658  
Query: 1 TACTGATCATCCTTGCTGCT 20  
|||||||\*|:|||||  
Sbjct: 194 ATGACTAGTAGCGACGACGA 175

>miR1425-5p Score: 0.0 R03G\_11281  
Query: 1 TACTGATCATCCTTGCTGCT 20  
|||||||:|||||  
Sbjct: 194 ATGACTAGTAGGAACGACGA 175

>miR1425-5p Score: 1.5 R03G\_10550  
Query: 1 TACTGATCATCCTTGCTGCT 20  
|||||||:|\*|||  
Sbjct: 194 ATGACTAGTAGGGACAACGA 175

>miR1425-5p Score: 0.5 R03G\_10741  
Query: 1 TACTGATCATCCTTGCTGCT 20  
|||||||:|||||  
Sbjct: 194 ATGACTAGTAGGGACGACGA 175

>miR1425-5p Score: 0.5 R03G\_10763  
Query: 1 TACTGATCATCCTTGCTGCT 20  
|||||||:|||||  
Sbjct: 194 ATGACTAGTAGGGACGACGA 175

>miR1425-5p Score: 0.5 R03G\_10769  
Query: 1 TACTGATCATCCTTGCTGCT 20  
|||||||:|||||  
Sbjct: 71 ATGACTAGTAGGGACGACGA 52

>miR1425-5p Score: 1.5 R03G\_10787  
Query: 1 TACTGATCATCCTTGCTGCT 20  
|||||||:|\*|||  
Sbjct: 194 ATGACTAGTAGGGACAACGA 175

>miR1425-5p Score: 1.5 R03G\_08847  
Query: 1 TACTGATCATCCTTGCTGCT 20  
|||||||\*|:|||||  
Sbjct: 194 ATGACTAGTAAGGACGACGA 175

>miR1425-5p Score: 0.0 R03G\_07690

Query: 1 TACTGATCATCCTTGCTGCT 20  
|||||  
Sbjct: 194 ATGACTAGTAGGAACGACGA 175  
>miR1425-5p Score: 0.0 R03G\_07707  
Query: 1 TACTGATCATCCTTGCTGCT 20  
|||||  
Sbjct: 386 ATGACTAGTAGGAACGACGA 367  
>miR1425-5p Score: 0.5 R03G\_02706  
Query: 1 TACTGATCATCCTTGCTGCT 20  
|||||:|||||  
Sbjct: 386 ATGACTAGTAGGGACGACGA 367  
>miR1425-5p Score: 0.5 R03G\_02845  
Query: 1 TACTGATCATCCTTGCTGCT 20  
|||||:|||||  
Sbjct: 419 ATGACTAGTAGGGACGACGA 400  
>miR1425-5p Score: 0.5 R03G\_03602  
Query: 1 TACTGATCATCCTTGCTGCT 20  
|||||:|||||  
Sbjct: 335 ATGACTAGTAGGGACGACGA 316  
>miR1425-5p Score: 0.5 R03G\_03624  
Query: 1 TACTGATCATCCTTGCTGCT 20  
|||||:|||||  
Sbjct: 194 ATGACTAGTAGGGACGACGA 175  
>miR1425-5p Score: 0.0 R03G\_00679  
Query: 1 TACTGATCATCCTTGCTGCT 20  
|||||:|||||  
Sbjct: 386 ATGACTAGTAGGAACGACGA 367  
>miR1425-5p Score: 0.5 R03G\_00688  
Query: 1 TACTGATCATCCTTGCTGCT 20  
|||||:|||||  
Sbjct: 194 ATGACTAGTAGGGACGACGA 175  
>miR1425-5p Score: 2.5 R03G\_01212  
Query: 1 TACTGATCATCCTTGCTGCT 20  
\*|||||\*|||||\*|\*  
Sbjct: 1508 TTGACTAGTCGGAACGA-GT 1490  
>miR1425-5p Score: 0.5 R03G\_01960  
Query: 1 TACTGATCATCCTTGCTGCT 20  
|||||:|||||  
Sbjct: 386 ATGACTAGTAGGGACGACGA 367  
>miR1425-5p Score: 0.0 R03G\_17408  
Query: 1 TACTGATCATCCTTGCTGCT 20  
|||||:|||||  
Sbjct: 194 ATGACTAGTAGGAACGACGA 175  
>miR6270 Score: 2.0 R03G\_16714  
Query: 1 TTCGCTATTGGAATCTTCATCT 22

||||\*||:|||||||\*|||  
Sbjct: 276 AAGCTATGACCTTAGAAGCAGA 255  
>miR6270 Score: 0.0 R03G\_16803  
Query: 1 TTCGCTATTGGAATCTTCATCT 22  
|||||||  
Sbjct: 159 AAGCGATAACCTTAGAAGTAGA 138  
>miR6270 Score: 1.5 R03G\_14983  
Query: 1 TTCGCTATTGGAATCTTCATCT 22  
|||||||:|||||\*|||||  
Sbjct: 723 AAGCGATAGCCTTAGCAGTAGA 702  
>miR6270 Score: 1.5 R03G\_13914  
Query: 1 TTCGCTATTGGAATCTTCATCT 22  
|||||||:|||||\*|||||  
Sbjct: 918 AAGCGATAGCCTTAGCAGTAGA 897  
>miR6270 Score: 1.5 R03G\_12667  
Query: 1 TTCGCTATTGGAATCTTCATCT 22  
|||||||:|||||\*|||||  
Sbjct: 288 AAGCGATAGCCTTAGCAGTAGA 267  
>miR6270 Score: 1.5 R03G\_12058  
Query: 1 TTCGCTATTGGAATCTTCATCT 22  
|||||||:|||||\*|||||  
Sbjct: 918 AAGCGATAGCCTTAGCAGTAGA 897  
>miR6270 Score: 1.5 R03G\_10801  
Query: 1 TTCGCTATTGGAATCTTCATCT 22  
|||||||:|||||\*|||||  
Sbjct: 723 AAGCGATAGCCTTAGCAGTAGA 702  
>miR6270 Score: 1.5 R03G\_09614  
Query: 1 TTCGCTATTGGAATCTTCATCT 22  
|||||||:|||||\*|||||  
Sbjct: 249 AAGCGATAGCCTTAGCAGTAGA 228  
>miR6270 Score: 1.0 R03G\_05930  
Query: 1 TTCGCTATTGGAATCTTCATCT 22  
|||||||\*|||||||  
Sbjct: 582 AAGCGATAACCCTAGAAGTAGA 561  
>miR6270 Score: 1.5 R03G\_04831  
Query: 1 TTCGCTATTGGAATCTTCATCT 22  
\*|||||||:||||:|||||  
Sbjct: 1580 CAGCGATAACTTTAGGAGTAGA 1559  
>miR6270 Score: 1.5 R03G\_02233  
Query: 1 TTCGCTATTGGAATCTTCATCT 22  
|||||||:|||||\*|||||  
Sbjct: 447 AAGCGATAGCCTTAGCAGTAGA 426  
>miR6270 Score: 0.0 R03G\_03556  
Query: 1 TTCGCTATTGGAATCTTCATCT 22  
|||||||



Sbjct: 723 AAGCGATAACCTTAGAAGTAGA 702  
>miR6270 Score: 1.0 R03G\_03583  
Query: 1 TTCGCTATTGGAATCTTCATCT 22  
|||||\*|||||  
Sbjct: 723 AAGCGATAACCTTAAAAGTAGA 702  
>miR6270 Score: 0.0 R03G\_03780  
Query: 1 TTCGCTATTGGAATCTTCATCT 22  
|||||\*|||||  
Sbjct: 159 AAGCGATAACCTTAGAAGTAGA 138  
>miR6270 Score: 0.0 R03G\_03794  
Query: 1 TTCGCTATTGGAATCTTCATCT 22  
|||||\*|||||  
Sbjct: 159 AAGCGATAACCTTAGAAGTAGA 138  
>miR6270 Score: 1.5 R03G\_04116  
Query: 1 TTCGCTATTGGAATCTTCATCT 22  
||||\*|||||\*|||  
Sbjct: 282 AAGCTATAACCTTAGAAGAAGA 261  
>miR6270 Score: 1.5 R03G\_17462  
Query: 1 TTCGCTATTGGAATCTTCATCT 22  
||||||:|||||\*|||||  
Sbjct: 1050 AAGCGATAGCCTTAGCAGTAGA 1029  
>miR6270 Score: 1.5 R03G\_17451  
Query: 1 TTCGCTATTGGAATCTTCATCT 22  
||||||:|||||\*|||||  
Sbjct: 159 AAGCGATAGCCTTAGCAGTAGA 138  
>miR6270 Score: 0.0 R03G\_17374  
Query: 1 TTCGCTATTGGAATCTTCATCT 22  
|||||\*|||||  
Sbjct: 159 AAGCGATAACCTTAGAAGTAGA 138  
>miR6270 Score: 0.0 R03G\_17281  
Query: 1 TTCGCTATTGGAATCTTCATCT 22  
|||||\*|||||  
Sbjct: 159 AAGCGATAACCTTAGAAGTAGA 138  
>miR5532 Score: 2.5 R03G\_04039  
Query: 1 TGGAATATATCACACAAGTTGG 22  
\*|||||\*:::  
Sbjct: 395 CCCTTATATAGTGTATAGTT 374  
>miR5144-5p Score: 2.5 R03G\_17223  
Query: 1 TTCTTGTGCTGTGCAGTGA 19  
|||||\*|\*|||\*|  
Sbjct: 95 AAGAACACGAAAAGTCAGT 77  
>miR5144-5p Score: 2.5 R03G\_17017  
Query: 1 TTCTTGTGCTGTGCAGTGA 19  
|||||\*|\*|||\*|  
Sbjct: 371 AAGAACACGAAAAGTCAGT 353

>miR5144-5p Score: 0.0 R03G\_17069  
Query: 1 TTCTTGTGCTGTGCAGTGA 19  
|||||  
Sbjct: 236 AAGAACACGACACGTCACT 218

>miR5144-5p Score: 1.8 R03G\_17083  
Query: 1 TTCTTGTGCTGTGCAGTGA 19  
|||||\*|||::|  
Sbjct: 1721 AAGAACACGACAAGTCGTT 1703

>miR5144-5p Score: 2.5 R03G\_16725  
Query: 1 TTCTTGTGCTGTGCAGTGA 19  
|||||\*|\*|||\*|  
Sbjct: 113 AAGAACACGAAAAGTCAGT 95

>miR5144-5p Score: 2.5 R03G\_16742  
Query: 1 TTCTTGTGCTGTGCAGTGA 19  
|||||\*|\*|||\*|  
Sbjct: 371 AAGAACACGAAAAGTCAGT 353

>miR5144-5p Score: 0.0 R03G\_16796  
Query: 1 TTCTTGTGCTGTGCAGTGA 19  
|||||  
Sbjct: 371 AAGAACACGACACGTCACT 353

>miR5144-5p Score: 0.0 R03G\_16798  
Query: 1 TTCTTGTGCTGTGCAGTGA 19  
|||||  
Sbjct: 371 AAGAACACGACACGTCACT 353

>miR5144-5p Score: 1.5 R03G\_16689  
Query: 1 TTCTTGTGCTGTGCAGTGA 19  
||\*|||||:|  
Sbjct: 371 AAAAACACGACACGTCGCT 353

>miR5144-5p Score: 2.5 R03G\_16698  
Query: 1 TTCTTGTGCTGTGCAGTGA 19  
|||||\*|\*|||\*|  
Sbjct: 368 AAGAACACGAAAAGTCAGT 350

>miR5144-5p Score: 2.5 R03G\_16706  
Query: 1 TTCTTGTGCTGTGCAGTGA 19  
|||||\*|\*|||\*|  
Sbjct: 95 AAGAACACGAAAAGTCAGT 77

>miR5144-5p Score: 2.5 R03G\_16372  
Query: 1 TTCTTGTGCTGTGCAGTGA 19  
|||||\*|\*|||\*|  
Sbjct: 371 AAGAACACGAAAAGTCAGT 353

>miR5144-5p Score: 2.5 R03G\_16383  
Query: 1 TTCTTGTGCTGTGCAGTGA 19  
|||||\*|\*|||\*|  
Sbjct: 371 AAGAACACGAAAAGTCAGT 353

>miR5144-5p Score: 2.5 R03G\_16420

Query: 1 TTCTTGTGCTGTGCAGTGA 19  
|||||||\*|\*|||\*|  
Sbjct: 122 AAGAACACGAAAAGTCAGT 104  
>miR5144-5p Score: 0.5 R03G\_16431  
Query: 1 TTCTTGTGCTGTGCAGTGA 19  
|||||||:|||||  
Sbjct: 239 AAGAACACGACATGTCACT 221  
>miR5144-5p Score: 0.0 R03G\_16142  
Query: 1 TTCTTGTGCTGTGCAGTGA 19  
|||||||  
Sbjct: 374 AAGAACACGACACGTCACT 356  
>miR5144-5p Score: 0.0 R03G\_15664  
Query: 1 TTCTTGTGCTGTGCAGTGA 19  
|||||||  
Sbjct: 371 AAGAACACGACACGTCACT 353  
>miR5144-5p Score: 2.5 R03G\_15271  
Query: 1 TTCTTGTGCTGTGCAGTGA 19  
|||||||\*|\*|||\*|  
Sbjct: 371 AAGAACACGAAAAGTCAGT 353  
>miR5144-5p Score: 2.5 R03G\_15282  
Query: 1 TTCTTGTGCTGTGCAGTGA 19  
|||||||\*|\*|||\*|  
Sbjct: 95 AAGAACACGAAAAGTCAGT 77  
>miR5144-5p Score: 2.5 R03G\_15261  
Query: 1 TTCTTGTGCTGTGCAGTGA 19  
|||||||\*|\*|||\*|  
Sbjct: 371 AAGAACACGAAAAGTCAGT 353  
>miR5144-5p Score: 0.0 R03G\_14361  
Query: 1 TTCTTGTGCTGTGCAGTGA 19  
|||||||  
Sbjct: 371 AAGAACACGACACGTCACT 353  
>miR5144-5p Score: 1.5 R03G\_14568  
Query: 1 TTCTTGTGCTGTGCAGTGA 19  
||\*|||||||:||  
Sbjct: 371 AAAAACACGACACGTGCT 353  
>miR5144-5p Score: 2.5 R03G\_14770  
Query: 1 TTCTTGTGCTGTGCAGTGA 19  
|||||||\*|\*|||\*|  
Sbjct: 371 AAGAACACGAAAAGTCAGT 353  
>miR5144-5p Score: 2.5 R03G\_14284  
Query: 1 TTCTTGTGCTGTGCAGTGA 19  
\*|||||||:|\*|||\*|  
Sbjct: 447 TAGAACACGACGGGTCA-T 430  
>miR5144-5p Score: 2.5 R03G\_13714  
Query: 1 TTCTTGTGCTGTGCAGTGA 19

|||||||\*|\*|||\*|  
Sbjct: 371 AAGAACACGAAAAGTCAGT 353  
>miR5144-5p Score: 2.5 R03G\_13852  
Query: 1 TTCTTGTGCTGTGCAGTGA 19  
|||||||\*|\*|||\*|  
Sbjct: 122 AAGAACACGAAAAGTCAGT 104  
>miR5144-5p Score: 2.5 R03G\_12663  
Query: 1 TTCTTGTGCTGTGCAGTGA 19  
|||||||\*|\*|||\*|  
Sbjct: 206 AAGAACACGAAAAGTCAGT 188  
>miR5144-5p Score: 1.0 R03G\_11966  
Query: 1 TTCTTGTGCTGTGCAGTGA 19  
||\*|||||||  
Sbjct: 371 AAAAACACGACACGTCACT 353  
>miR5144-5p Score: 0.0 R03G\_12070  
Query: 1 TTCTTGTGCTGTGCAGTGA 19  
|||||||  
Sbjct: 371 AAGAACACGACACGTCACT 353  
>miR5144-5p Score: 2.5 R03G\_12537  
Query: 1 TTCTTGTGCTGTGCAGTGA 19  
|||||||\*|\*|||\*|  
Sbjct: 122 AAGAACACGAAAAGTCAGT 104  
>miR5144-5p Score: 2.5 R03G\_12653  
Query: 1 TTCTTGTGCTGTGCAGTGA 19  
|||||||\*|\*|||\*|  
Sbjct: 644 AAGAACACGAAAAGTCAGT 626  
>miR5144-5p Score: 1.5 R03G\_11238  
Query: 1 TTCTTGTGCTGTGCAGTGA 19  
||\*|||||||:|  
Sbjct: 239 AAAAACACGACACGTCGCT 221  
>miR5144-5p Score: 0.0 R03G\_11264  
Query: 1 TTCTTGTGCTGTGCAGTGA 19  
|||||||  
Sbjct: 371 AAGAACACGACACGTCACT 353  
>miR5144-5p Score: 2.5 R03G\_11781  
Query: 1 TTCTTGTGCTGTGCAGTGA 19  
|||||||\*|\*|||\*|  
Sbjct: 371 AAGAACACGAAAAGTCAGT 353  
>miR5144-5p Score: 0.0 R03G\_10516  
Query: 1 TTCTTGTGCTGTGCAGTGA 19  
|||||||  
Sbjct: 371 AAGAACACGACACGTCACT 353  
>miR5144-5p Score: 0.0 R03G\_10729  
Query: 1 TTCTTGTGCTGTGCAGTGA 19  
|||||||

Sbjct: 371 AAGAACACGACACGTCCT 353  
>miR5144-5p Score: 0.0 R03G\_10743  
Query: 1 TTCTTGTGCTGTGCAGTGA 19  
|||||

Sbjct: 371 AAGAACACGACACGTCCT 353  
>miR5144-5p Score: 0.0 R03G\_10773  
Query: 1 TTCTTGTGCTGTGCAGTGA 19  
|||||

Sbjct: 371 AAGAACACGACACGTCCT 353  
>miR5144-5p Score: 0.0 R03G\_10780  
Query: 1 TTCTTGTGCTGTGCAGTGA 19  
|||||

Sbjct: 371 AAGAACACGACACGTCCT 353  
>miR5144-5p Score: 1.5 R03G\_10798  
Query: 1 TTCTTGTGCTGTGCAGTGA 19  
||\*|||||:|

Sbjct: 371 AAAAACACGACACGTCGCT 353  
>miR5144-5p Score: 2.5 R03G\_09193  
Query: 1 TTCTTGTGCTGTGCAGTGA 19  
|||||\*|\*|\*|

Sbjct: 95 AAGAACACGAAAAGTCAGT 77  
>miR5144-5p Score: 0.0 R03G\_09194  
Query: 1 TTCTTGTGCTGTGCAGTGA 19  
|||||

Sbjct: 371 AAGAACACGACACGTCCT 353  
>miR5144-5p Score: 0.0 R03G\_09542  
Query: 1 TTCTTGTGCTGTGCAGTGA 19  
|||||

Sbjct: 371 AAGAACACGACACGTCCT 353  
>miR5144-5p Score: 0.0 R03G\_09945  
Query: 1 TTCTTGTGCTGTGCAGTGA 19  
|||||

Sbjct: 95 AAGAACACGACACGTCCT 77  
>miR5144-5p Score: 0.0 R03G\_09967  
Query: 1 TTCTTGTGCTGTGCAGTGA 19  
|||||

Sbjct: 371 AAGAACACGACACGTCCT 353  
>miR5144-5p Score: 2.5 R03G\_07984  
Query: 1 TTCTTGTGCTGTGCAGTGA 19  
|||||\*|\*|\*|

Sbjct: 371 AAGAACACGAAAAGTCAGT 353  
>miR5144-5p Score: 2.0 R03G\_08312  
Query: 1 TTCTTGTGCTGTGCAGTGA 19  
|||||\*|\*|

Sbjct: 234 AAGAACACGACAGGTGACT 216

>miR5144-5p Score: 0.0 R03G\_08660  
Query: 1 TTCTTGTGCTGTGCAGTGA 19  
|||||  
Sbjct: 371 AAGAACACGACACGTCACT 353

>miR5144-5p Score: 0.0 R03G\_07030  
Query: 1 TTCTTGTGCTGTGCAGTGA 19  
|||||  
Sbjct: 371 AAGAACACGACACGTCACT 353

>miR5144-5p Score: 0.0 R03G\_07038  
Query: 1 TTCTTGTGCTGTGCAGTGA 19  
|||||  
Sbjct: 371 AAGAACACGACACGTCACT 353

>miR5144-5p Score: 0.0 R03G\_07040  
Query: 1 TTCTTGTGCTGTGCAGTGA 19  
|||||  
Sbjct: 371 AAGAACACGACACGTCACT 353

>miR5144-5p Score: 1.5 R03G\_07103  
Query: 1 TTCTTGTGCTGTGCAGTGA 19  
||\*|||||:|  
Sbjct: 95 AAAAACACGACACGTCGCT 77

>miR5144-5p Score: 0.0 R03G\_07124  
Query: 1 TTCTTGTGCTGTGCAGTGA 19  
|||||  
Sbjct: 371 AAGAACACGACACGTCACT 353

>miR5144-5p Score: 2.5 R03G\_07137  
Query: 1 TTCTTGTGCTGTGCAGTGA 19  
|||||\*|\*|\*|\*|  
Sbjct: 371 AAGAACACGAAAAGTCAGT 353

>miR5144-5p Score: 2.5 R03G\_07702  
Query: 1 TTCTTGTGCTGTGCAGTGA 19  
|||||\*|\*|\*|\*|  
Sbjct: 122 AAGAACACGAAAAGTCAGT 104

>miR5144-5p Score: 2.5 R03G\_07705  
Query: 1 TTCTTGTGCTGTGCAGTGA 19  
|||||\*|\*|\*|\*|  
Sbjct: 371 AAGAACACGAAAAGTCAGT 353

>miR5144-5p Score: 1.0 R03G\_07860  
Query: 1 TTCTTGTGCTGTGCAGTGA 19  
|||||\*|\*|\*|\*|  
Sbjct: 122 AAGAACACGAAAAGTCAGT 104

>miR5144-5p Score: 2.5 R03G\_07867  
Query: 1 TTCTTGTGCTGTGCAGTGA 19  
|||||\*|\*|\*|\*|  
Sbjct: 371 AAGAACACGAGACGTCACT 353

>miR5144-5p Score: 1.5 R03G\_05628  
Query: 1 TTCTTGTGCTGTGCAGTGA 19  
|||||\*|\*|\*|\*|  
Sbjct: 122 AAGAACACGAAAAGTCAGT 104

Query: 1 TTCTTGTGCTGTGCAGTGA 19  
||\*|||||||:|  
Sbjct: 371 AAAAACACGACACGTCGCT 353  
>miR5144-5p Score: 0.0 R03G\_05921  
Query: 1 TTCTTGTGCTGTGCAGTGA 19  
|||||||  
Sbjct: 371 AAGAACACGACACGTCCT 353  
>miR5144-5p Score: 0.0 R03G\_05939  
Query: 1 TTCTTGTGCTGTGCAGTGA 19  
|||||||  
Sbjct: 371 AAGAACACGACACGTCCT 353  
>miR5144-5p Score: 1.0 R03G\_05953  
Query: 1 TTCTTGTGCTGTGCAGTGA 19  
||\*|||||||  
Sbjct: 371 AAAAACACGACACGTCCT 353  
>miR5144-5p Score: 1.5 R03G\_05959  
Query: 1 TTCTTGTGCTGTGCAGTGA 19  
||\*|||||||:|  
Sbjct: 371 AAAAACACGACACGTCGCT 353  
>miR5144-5p Score: 2.5 R03G\_06008  
Query: 1 TTCTTGTGCTGTGCAGTGA 19  
|||:|||\*|||||:|\*|  
Sbjct: 136 AAGGACAAGACACGTCG-T 119  
>miR5144-5p Score: 2.0 R03G\_06678  
Query: 1 TTCTTGTGCTGTGCAGTGA 19  
|||||||\*|||\*||  
Sbjct: 860 AAGAACACGACTCGTC-CT 843  
>miR5144-5p Score: 2.5 R03G\_06717  
Query: 1 TTCTTGTGCTGTGCAGTGA 19  
|||||||\*|\*|||\*|  
Sbjct: 371 AAGAACACGAAAAGTCAGT 353  
>miR5144-5p Score: 2.5 R03G\_04674  
Query: 1 TTCTTGTGCTGTGCAGTGA 19  
|||||||\*|\*|||\*|  
Sbjct: 122 AAGAACACGAAAAGTCAGT 104  
>miR5144-5p Score: 2.5 R03G\_04682  
Query: 1 TTCTTGTGCTGTGCAGTGA 19  
|||||||\*|\*|||\*|  
Sbjct: 371 AAGAACACGAAAAGTCAGT 353  
>miR5144-5p Score: 2.5 R03G\_04695  
Query: 1 TTCTTGTGCTGTGCAGTGA 19  
|||||||\*|\*|||\*|  
Sbjct: 161 AAGAACACGAAAAGTCAGT 143  
>miR5144-5p Score: 2.5 R03G\_04759  
Query: 1 TTCTTGTGCTGTGCAGTGA 19

```
*|||||||*|||*|||||||
Sbjct: 285 TAGAACACCACAGGTCACT 267
>miR5144-5p Score: 0.0 R03G_04803
Query: 1 TTCTTGTGCTGTGCAGTGA 19
|||||||
Sbjct: 371 AAGAACACGACACGTCACT 353
>miR5144-5p Score: 0.0 R03G_05264
Query: 1 TTCTTGTGCTGTGCAGTGA 19
|||||||
Sbjct: 371 AAGAACACGACACGTCACT 353
>miR5144-5p Score: 0.0 R03G_05267
Query: 1 TTCTTGTGCTGTGCAGTGA 19
|||||||
Sbjct: 371 AAGAACACGACACGTCACT 353
>miR5144-5p Score: 2.5 R03G_05268
Query: 1 TTCTTGTGCTGTGCAGTGA 19
|||||||*|*|||*|
Sbjct: 371 AAGAACACGAAAAGTCAGT 353
>miR5144-5p Score: 0.0 R03G_05435
Query: 1 TTCTTGTGCTGTGCAGTGA 19
|||||||
Sbjct: 371 AAGAACACGACACGTCACT 353
>miR5144-5p Score: 2.5 R03G_02824
Query: 1 TTCTTGTGCTGTGCAGTGA 19
|||||||*|*|||*|
Sbjct: 371 AAGAACACGAAAAGTCAGT 353
>miR5144-5p Score: 0.0 R03G_02956
Query: 1 TTCTTGTGCTGTGCAGTGA 19
|||||||
Sbjct: 371 AAGAACACGACACGTCACT 353
>miR5144-5p Score: 0.5 R03G_03557
Query: 1 TTCTTGTGCTGTGCAGTGA 19
|||||||:|||||||
Sbjct: 197 AAGAACACGACGCGTCACT 179
>miR5144-5p Score: 0.0 R03G_04207
Query: 1 TTCTTGTGCTGTGCAGTGA 19
|||||||
Sbjct: 371 AAGAACACGACACGTCACT 353
>miR5144-5p Score: 0.0 R03G_04210
Query: 1 TTCTTGTGCTGTGCAGTGA 19
|||||||
Sbjct: 371 AAGAACACGACACGTCACT 353
>miR5144-5p Score: 2.5 R03G_00238
Query: 1 TTCTTGTGCTGTGCAGTGA 19
|||||||*|*|||*|
```



Sbjct: 371 AAGAACACGAAAAGTCAGT 353  
>miR5144-5p Score: 0.0 R03G\_00256  
Query: 1 TTCTTGTGCTGTGCAGTGA 19  
|||||

Sbjct: 371 AAGAACACGACACGTCACT 353  
>miR5144-5p Score: 2.5 R03G\_00446  
Query: 1 TTCTTGTGCTGTGCAGTGA 19  
|||||\*|||\*|||\*|

Sbjct: 804 AAGAACAAGACAGGTCAGT 786  
>miR5144-5p Score: 2.5 R03G\_01205  
Query: 1 TTCTTGTGCTGTGCAGTGA 19  
|||||\*|||\*|||\*|

Sbjct: 371 AAGAACACGAAAAGTCAGT 353  
>miR5144-5p Score: 2.5 R03G\_01328  
Query: 1 TTCTTGTGCTGTGCAGTGA 19  
|||||\*|||\*|||\*|

Sbjct: 371 AAGAACACGAAAAGTCAGT 353  
>miR5144-5p Score: 0.0 R03G\_01942  
Query: 1 TTCTTGTGCTGTGCAGTGA 19  
|||||

Sbjct: 371 AAGAACACGACACGTCACT 353  
>miR5144-5p Score: 2.5 R03G\_01962  
Query: 1 TTCTTGTGCTGTGCAGTGA 19  
|||||\*|||\*|||\*|

Sbjct: 122 AAGAACACGAAAAGTCAGT 104  
>miR5144-5p Score: 0.0 R03G\_17449  
Query: 1 TTCTTGTGCTGTGCAGTGA 19  
|||||

Sbjct: 371 AAGAACACGACACGTCACT 353  
>miR5144-5p Score: 2.5 R03G\_17416  
Query: 1 TTCTTGTGCTGTGCAGTGA 19  
|||||\*|||\*|||\*|

Sbjct: 371 AAGAACACGAAAAGTCAGT 353  
>miR5144-5p Score: 2.5 R03G\_17399  
Query: 1 TTCTTGTGCTGTGCAGTGA 19  
|||||\*|||\*|||\*|

Sbjct: 371 AAGAACACGAAAAGTCAGT 353  
>miR5144-5p Score: 2.5 R03G\_17387  
Query: 1 TTCTTGTGCTGTGCAGTGA 19  
|||||\*|||\*|||\*|

Sbjct: 371 AAGAACACGAAAAGTCAGT 353  
>miR5144-5p Score: 2.5 R03G\_17355  
Query: 1 TTCTTGTGCTGTGCAGTGA 19  
|||||\*|||\*|||\*|

Sbjct: 206 AAGAACACGAAAAGTCAGT 188

>miR5144-5p Score: 1.0 R03G\_17325  
Query: 1 TTCTTGTGCTGTGCAGTGA 19  
||\*|||||||  
Sbjct: 371 AAAAACACGACACGTCCT 353

>miR5144-5p Score: 1.5 R03G\_17308  
Query: 1 TTCTTGTGCTGTGCAGTGA 19  
||\*|||||||:|  
Sbjct: 371 AAAAACACGACACGTCGCT 353

>miR5144-5p Score: 2.5 R03G\_17291  
Query: 1 TTCTTGTGCTGTGCAGTGA 19  
|||||||\*|\*|||\*|  
Sbjct: 371 AAGAACACGAAAAGTCAGT 353

>miR6462e Score: 2.5 R03G\_16134  
Query: 1 TTTTTCCTTTTGTCTACT 20  
|||:|||||||\*|\*|  
Sbjct: 646 AAAGACGGAAAAACAAA-AA 628

>miR6462e Score: 2.5 R03G\_16191  
Query: 1 TTTTTCCTTTTGTCTA-CT 20  
\*||||\*|||||||:|\*||  
Sbjct: 3674 CAAAACGAAAAACAGGTAGA 3654

>miR6462e Score: 2.5 R03G\_16217  
Query: 1 TTTTTCCTTTTGTCTACT 20  
|||||||:|:|\*|\*||  
Sbjct: 339 AAAAACGGGAAGACAAA-GA 321

>miR6462e Score: 1.8 R03G\_16043  
Query: 1 TTTTTCCTTTTGTCTACT 20  
::|||||||:||||\*|  
Sbjct: 991 GGAAACGGAAAAGCAGAT-A 973

>miR6462e Score: 2.5 R03G\_15793  
Query: 1 TTTTTCCTTTTGTCTACT 20  
|||||:|||:||||:|\*|\*|  
Sbjct: 865 AAAAATGGAGAAACGGA-AA 847

>miR6462e Score: 2.5 R03G\_15284  
Query: 1 TTTTTCCTTTTGTCTACT 20  
|||:|||||||\*|\*|  
Sbjct: 646 AAAGACGGAAAAACAAA-AA 628

>miR6462e Score: 2.0 R03G\_15307  
Query: 1 TTTTTCCTTTTGTCTACT 20  
\*:|||||||:|||\*||  
Sbjct: 1128 TGAAACGGAAAAATAGA-GA 1110

>miR6462e Score: 2.0 R03G\_15381  
Query: 1 TTTTTCCTTTTGTCTACT 20  
\*:|||||||:||||||\*|  
Sbjct: 842 TGAAACGGAAAGAACAGATCA 823

>miR6462e Score: 2.5 R03G\_15382

Query: 1 TTTTGCCTTTTGTCTACT 20  
|:|||||:|\*||\*||  
Sbjct: 2455 AGAAACGGAAAGAAAAGA-GA 2437  
>miR6462e Score: 0.0 R03G\_15250  
Query: 1 TTTTGCCTTTTGTCTACT 20  
|||||  
Sbjct: 4129 AAAAACGGAAAAACAGATGA 4110  
>miR6462e Score: 0.0 R03G\_14355  
Query: 1 TTTTGCCTTTTGTCTACT 20  
|||||  
Sbjct: 2380 AAAAACGGAAAAACAGATGA 2361  
>miR6462e Score: 2.5 R03G\_14686  
Query: 1 TTTTGCCTTTTGTCTACT 20  
|||:|:|||||:|\*||\*||  
Sbjct: 577 AAAAGTGGAAAAATAGA-AA 559  
>miR6462e Score: 0.0 R03G\_13867  
Query: 1 TTTTGCCTTTTGTCTACT 20  
|||||  
Sbjct: 4090 AAAAACGGAAAAACAGATGA 4071  
>miR6462e Score: 0.0 R03G\_13920  
Query: 1 TTTTGCCTTTTGTCTACT 20  
|||||  
Sbjct: 4174 AAAAACGGAAAAACAGATGA 4155  
>miR6462e Score: 2.0 R03G\_14112  
Query: 1 TTTTGCCTTTTGTCTACT 20  
|:|||||\*||\*||  
Sbjct: 265 AGAAACGGAAAAAGAGATTA 246  
>miR6462e Score: 2.2 R03G\_13564  
Query: 1 TTTTGCCTTTTGTCTACT 20  
:|||||:|:||||\*|||  
Sbjct: 177 GAAAACGGAGAGACAGTTGA 158  
>miR6462e Score: 0.0 R03G\_13749  
Query: 1 TTTTGCCTTTTGTCTACT 20  
|||||  
Sbjct: 2683 AAAAACGGAAAAACAGATGA 2664  
>miR6462e Score: 2.5 R03G\_12946  
Query: 1 TTTTGCCTTTTGTCTACT 20  
|:|||||:|\*||\*||  
Sbjct: 232 AGAAACGGAAAAATAAA-GA 214  
>miR6462e Score: 2.5 R03G\_12236  
Query: 1 TTTTGCCTTTTGTCTAC-T 20  
|||||\*|||:|\*||\*||  
Sbjct: 727 AAAAACGGAAAAATAGACGTA 707  
>miR6462e Score: 2.2 R03G\_12274  
Query: 1 TTTTGCCTTTTGTCTACT 20

:|\*:|||||:|||||  
Sbjct: 394 GATGACGGAAAAATAGATGA 375  
>miR6462e Score: 2.0 R03G\_12330  
Query: 1 TTTTGCCTTTTGTCTACT 20  
||:|:|||||:|||||\*||  
Sbjct: 592 AAGAGCGGAAGAACAGACGA 573  
>miR6462e Score: 1.5 R03G\_12588  
Query: 1 TTTTGCCTTTTGTCTACT 20  
\*:|||||\*||  
Sbjct: 880 CGAAACGGAAAAACAGACGA 861  
>miR6462e Score: 2.0 R03G\_11598  
Query: 1 TTTTGCCTTTTGTCTACT 20  
||||\*|||||:||||\*||  
Sbjct: 673 AAAAAAGGAAAAGCAGAAGA 654  
>miR6462e Score: 0.0 R03G\_11776  
Query: 1 TTTTGCCTTTTGTCTACT 20  
|||||  
Sbjct: 1264 AAAAACGGAAAAACAGATGA 1245  
>miR6462e Score: 2.5 R03G\_10466  
Query: 1 TTTTGCCTTTTGTCTA-CT 20  
|:|||\*|||||\*||  
Sbjct: 1360 AGAAAAGGAAAACAGAAAGA 1340  
>miR6462e Score: 0.0 R03G\_10558  
Query: 1 TTTTGCCTTTTGTCTACT 20  
|||||  
Sbjct: 1927 AAAAACGGAAAAACAGATGA 1908  
>miR6462e Score: 2.5 R03G\_11011  
Query: 1 TTTTGCCTTTTGTCTAC-T 20  
|||||\*|:|||||\*|\*|  
Sbjct: 525 AAAAACGAAGAAACAGAAGCA 505  
>miR6462e Score: 2.5 R03G\_09886  
Query: 1 TTTTGCCTTTTGTCTACT 20  
|||||\*|||||\*|\*|  
Sbjct: 295 AAAAAGTAAAAACAGTTAA 276  
>miR6462e Score: 2.5 R03G\_09933  
Query: 1 TTTTGCCTTTTGTCTACT 20  
|||:|||||\*|\*|  
Sbjct: 646 AAAGACGGAAAAACAAA-AA 628  
>miR6462e Score: 2.5 R03G\_09957  
Query: 1 TTTTGCCTTTTGTCTACT 20  
|||:|||||\*|\*|  
Sbjct: 646 AAAGACGGAAAAACAAA-AA 628  
>miR6462e Score: 0.0 R03G\_09965  
Query: 1 TTTTGCCTTTTGTCTACT 20  
|||||

Sbjct: 4174 AAAAACGGAAAAACAGATGA 4155  
>miR6462e Score: 2.5 R03G\_10229  
Query: 1 TTTTTCCTTTTTGTCTACT 20  
|||:|||||||\*|\*\*|  
Sbjct: 58 AAAGACGGAAAAACAAA-AA 40  
>miR6462e Score: 2.2 R03G\_08307  
Query: 1 TTTTTCCTTTTTGTCTACT 20  
:|||||||\*||:||||\*|  
Sbjct: 2137 GAAACGGACAAGCAGAT-A 2119  
>miR6462e Score: 2.0 R03G\_07491  
Query: 1 TTTTTCCTTTTTGTCTACT 20  
||||\*|||||||:|||\*|  
Sbjct: 46 AAAAAGGGAAAAACGGAT-A 28  
>miR6462e Score: 2.5 R03G\_07675  
Query: 1 TTTTTCCTTTTTGTCTACT 20  
|||:|||||||\*|\*\*|  
Sbjct: 58 AAAGACGGAAAAACAAA-AA 40  
>miR6462e Score: 0.0 R03G\_05619  
Query: 1 TTTTTCCTTTTTGTCTACT 20  
|||||||  
Sbjct: 2317 AAAAACGGAAAAACAGATGA 2298  
>miR6462e Score: 0.0 R03G\_06427  
Query: 1 TTTTTCCTTTTTGTCTACT 20  
|||||||  
Sbjct: 3766 AAAAACGGAAAAACAGATGA 3747  
>miR6462e Score: 0.0 R03G\_06428  
Query: 1 TTTTTCCTTTTTGTCTACT 20  
|||||||  
Sbjct: 3268 AAAAACGGAAAAACAGATGA 3249  
>miR6462e Score: 0.0 R03G\_06442  
Query: 1 TTTTTCCTTTTTGTCTACT 20  
|||||||  
Sbjct: 4831 AAAAACGGAAAAACAGATGA 4812  
>miR6462e Score: 2.2 R03G\_06452  
Query: 1 TTTTTCCTTTTTGTCTACT 20  
:||||\*|||||||\*|  
Sbjct: 565 GAAAAAGGAAAAACAGAACA 546  
>miR6462e Score: 2.2 R03G\_04477  
Query: 1 TTTTTCCTTTTTGTCTACT 20  
:|||\*|||||||:|||\*|  
Sbjct: 2971 GAAACGGAAAAATAGATAA 2952  
>miR6462e Score: 2.5 R03G\_04479  
Query: 1 TTTTTCCTTTTTGTCTACT 20  
||:||||||:|||\*|||\*|  
Sbjct: 229 AAGAACGGAGAAAAAGATAA 210

>miR6462e Score: 2.5 R03G\_02685  
Query: 1 TTTTTCCTTTTTGTCTACT 20  
|:|||||:||||:|\*\*|  
Sbjct: 741 AGAAACGGAGAAACGGAACA 722

>miR6462e Score: 0.0 R03G\_02691  
Query: 1 TTTTTCCTTTTTGTCTACT 20  
|||||  
Sbjct: 7663 AAAAACGGAAAAACAGATGA 7644

>miR6462e Score: 2.5 R03G\_02760  
Query: 1 TTTTTCCTTTTTGTCTACT 20  
|||:\*|||:|||||\*||  
Sbjct: 412 AAAGAAGGAGAAACAGAAGA 393

>miR6462e Score: 2.5 R03G\_02836  
Query: 1 TTTTTCCTTTTTGTCTACT 20  
|||:|||||\*|\*\*|  
Sbjct: 646 AAAGACGGAAAAACAAA-AA 628

>miR6462e Score: 0.0 R03G\_02959  
Query: 1 TTTTTCCTTTTTGTCTACT 20  
|||||  
Sbjct: 4174 AAAAACGGAAAAACAGATGA 4155

>miR6462e Score: 2.5 R03G\_03104  
Query: 1 TTTTTCCTTTTTGTCTACT 20  
|||:|||||\*|\*\*|  
Sbjct: 646 AAAGACGGAAAAACAAA-AA 628

>miR6462e Score: 0.0 R03G\_03547  
Query: 1 TTTTTCCTTTTTGTCTACT 20  
|||||  
Sbjct: 4174 AAAAACGGAAAAACAGATGA 4155

>miR6462e Score: 0.0 R03G\_04115  
Query: 1 TTTTTCCTTTTTGTCTACT 20  
|||||  
Sbjct: 1117 AAAAACGGAAAAACAGATGA 1098

>miR6462e Score: 2.5 R03G\_04218  
Query: 1 TTTTTCCTTTTTGTCTACT 20  
|||:|||||\*|\*\*|  
Sbjct: 646 AAAGACGGAAAAACAAA-AA 628

>miR6462e Score: 2.5 R03G\_00105  
Query: 1 TTTTTCCTTTTTGTCTACT 20  
||||||\*||:||||\*||  
Sbjct: 2170 AAAAACGGTGAAGCAGAAGA 2151

>miR6462e Score: 2.5 R03G\_00458  
Query: 1 TTTTTCCTTTTTGTCTA-CT 20  
|:||\*|||||\*||  
Sbjct: 1447 AGAAAAGGAAAAACAGAAAGA 1427

>miR6462e Score: 2.5 R03G\_00717

Query: 1 TTTTTCCTTTTTGTCTACT 20  
|||\*|||\*|||\*|||\*||  
Sbjct: 217 AAAACCGGAAAAAAGAAGA 198  
>miR6462e Score: 2.0 R03G\_01140  
Query: 1 TTTTTCCTTTTTGTCTACT 20  
|||:|||||\*|||\*||  
Sbjct: 247 AAAAGCGGAAAAAAGAAGA 228  
>miR6462e Score: 0.0 R03G\_01330  
Query: 1 TTTTTCCTTTTTGTCTACT 20  
|||||\*|||\*|||\*|||  
Sbjct: 1408 AAAACCGGAAAAACAGATGA 1389  
>miR6462e Score: 2.5 R03G\_01423  
Query: 1 TTTTTCCTTTTTGTCTACT 20  
\*:|||||:|\*|||\*|||  
Sbjct: 25 TGAAACGGAAGAAAAGATGA 6  
>miR6462e Score: 2.5 R03G\_01430  
Query: 1 TTTTTCCTTTTTGTCTACT 20  
\*:|||||:|\*|||\*|||  
Sbjct: 25 TGAAACGGAAGAAAAGATGA 6  
>miR6462e Score: 0.0 R03G\_01613  
Query: 1 TTTTTCCTTTTTGTCTACT 20  
|||||\*|||\*|||\*|||  
Sbjct: 2371 AAAACCGGAAAAACAGATGA 2352  
>miR6462e Score: 2.5 R03G\_01940  
Query: 1 TTTTTCCTTTTTGTCTACT 20  
|||:|||||\*|||\*|||\*|||  
Sbjct: 646 AAAGACGGAAAAACAAA-AA 628  
>miR6462e Score: 2.5 R03G\_02035  
Query: 1 TTTTTCCTTTTTGTCTACT 20  
\*|||||\*|||\*|||\*|||\*|||  
Sbjct: 2454 TAAACGGAACAACAGA-AA 2436  
>miR6462e Score: 2.5 R03G\_02179  
Query: 1 TTTTTCCTTTTTGTCTACT 20  
\*|||||\*|||:|||||\*|||  
Sbjct: 2214 CAAAACGGTAAGACAGACGA 2195  
>miR6462e Score: 2.2 R03G\_02193  
Query: 1 TTTTTCCTTTTTGTCTACT 20  
:|||||\*|||\*|||\*|||\*|||  
Sbjct: 271 GAAAACGAAAAACGGAAGA 252  
>miR6462e Score: 0.0 R03G\_02222  
Query: 1 TTTTTCCTTTTTGTCTACT 20  
|||||\*|||\*|||\*|||\*|||  
Sbjct: 1228 AAAACCGGAAAAACAGATGA 1209  
>miR6462e Score: 0.0 R03G\_17404  
Query: 1 TTTTTCCTTTTTGTCTACT 20

|||||  
Sbjct: 802 AAAAACGGAAAAACAGATGA 783  
>miR6462e Score: 0.0 R03G\_17371  
Query: 1 TTTTGCCTTTTGTCTACT 20  
|||||  
Sbjct: 4129 AAAAACGGAAAAACAGATGA 4110  
>miR6462e Score: 1.0 R03G\_17326  
Query: 1 TTTTGCCTTTTGTCTACT 20  
|||||\*|||  
Sbjct: 4006 AAAAACGGAAAAACACATGA 3987  
>miR9657a-3p Score: 1.5 R03G\_15836  
Query: 1 TGGTGCTTCCTGTCGTACAGGT 22  
||\*|||:|||||  
Sbjct: 112 ACCTCGAAGGACAGTATGTCCA 91  
>miR9657a-3p Score: 0.5 R03G\_06070  
Query: 1 TGGTGCTTCCTGTCGTACAGGT 22  
|||||:|||||  
Sbjct: 112 ACCACGAAGGACAGTATGTCCA 91  
>miR6202 Score: 0.0 R03G\_16319  
Query: 1 TGAGGATTTAAGCTTTGAAG 20  
|||||  
Sbjct: 4073 ACTCCTAAATTCGAAACTTC 4054  
>miR6202 Score: 2.0 R03G\_15536  
Query: 1 TGAGGATTTAAGCTTTGAAG 20  
|||||:|||||\*\*||  
Sbjct: 3647 ACTCCTAAGTTCGAAA-ATC 3629  
>miR6202 Score: 0.0 R03G\_14345  
Query: 1 TGAGGATTTAAGCTTTGAAG 20  
|||||  
Sbjct: 35 ACTCCTAAATTCGAAACTTC 16  
>miR6202 Score: 0.0 R03G\_12753  
Query: 1 TGAGGATTTAAGCTTTGAAG 20  
|||||  
Sbjct: 35 ACTCCTAAATTCGAAACTTC 16  
>miR6202 Score: 0.0 R03G\_12207  
Query: 1 TGAGGATTTAAGCTTTGAAG 20  
|||||  
Sbjct: 4073 ACTCCTAAATTCGAAACTTC 4054  
>miR6202 Score: 2.0 R03G\_10954  
Query: 1 TGAGGATTTAAGCTTTGAAG 20  
|\*|||:|||:|||||  
Sbjct: 35 AGTCCTGAATTTGAAACTTC 16  
>miR6202 Score: 1.0 R03G\_09206  
Query: 1 TGAGGATTTAAGCTTTGAAG 20  
|||||\*|||||



Sbjct: 35 ACTCCTAAATTCGAAACTTC 16  
>miR6202 Score: 2.5 R03G\_09360  
Query: 1 TGAGGATTTAAGCTTTGAAG 20  
||\*\*|||||||:|  
Sbjct: 309 ACAACTAAATTCGAAATTTTC 290  
>miR6202 Score: 2.5 R03G\_09423  
Query: 1 TGAGGATTTAAGCTTTGAAG 20  
\*||\*|||:|:|  
Sbjct: 351 TCTGCTAGATTTGAAACTTC 332  
>miR6202 Score: 0.0 R03G\_08062  
Query: 1 TGAGGATTTAAGCTTTGAAG 20  
|  
Sbjct: 854 ACTCCTAAATTCGAAACTTC 835  
>miR6202 Score: 0.0 R03G\_08114  
Query: 1 TGAGGATTTAAGCTTTGAAG 20  
|  
Sbjct: 35 ACTCCTAAATTCGAAACTTC 16  
>miR6202 Score: 0.0 R03G\_06977  
Query: 1 TGAGGATTTAAGCTTTGAAG 20  
|  
Sbjct: 638 ACTCCTAAATTCGAAACTTC 619  
>miR6202 Score: 2.5 R03G\_05992  
Query: 1 TGAGGATTTAAGCTTTGAAG 20  
|  
Sbjct: 825 ACTCCTAAATTCGACTCTAC 806  
>miR6202 Score: 0.0 R03G\_04256  
Query: 1 TGAGGATTTAAGCTTTGAAG 20  
|  
Sbjct: 35 ACTCCTAAATTCGAAACTTC 16  
>miR6202 Score: 0.0 R03G\_02944  
Query: 1 TGAGGATTTAAGCTTTGAAG 20  
|  
Sbjct: 3392 ACTCCTAAATTCGAAACTTC 3373  
>miR6202 Score: 1.2 R03G\_00493  
Query: 1 TGAGGATTTAAGCTTTGAAG 20  
:\*|  
Sbjct: 377 GATCCTAAATTCGAAACTTC 358  
>miR6202 Score: 0.0 R03G\_00653  
Query: 1 TGAGGATTTAAGCTTTGAAG 20  
|  
Sbjct: 3983 ACTCCTAAATTCGAAACTTC 3964  
>miR6202 Score: 0.0 R03G\_01026  
Query: 1 TGAGGATTTAAGCTTTGAAG 20  
|  
Sbjct: 35 ACTCCTAAATTCGAAACTTC 16

>miR6202 Score: 0.0 R03G\_01242  
Query: 1 TGAGGATTTAAGCTTTGAAG 20  
|||||  
Sbjct: 35 ACTCCTAAATTCGAAACTTC 16

>miR6202 Score: 0.0 R03G\_01243  
Query: 1 TGAGGATTTAAGCTTTGAAG 20  
|||||  
Sbjct: 35 ACTCCTAAATTCGAAACTTC 16

>miR6202 Score: 2.5 R03G\_01379  
Query: 1 TGAGGATTTAAGCTTTGAAG 20  
|||\*:|||\*|||||  
Sbjct: 324 ACTATTAACTTCGAAACTTC 305

>miR6202 Score: 2.2 R03G\_17137  
Query: 1 TGAGGATTTAAGCTTTGAAG 20  
|\*|||\*|||||:  
Sbjct: 1523 AGTCCCAAATTCGAAACTTT 1504

>miR167c-3p Score: 0.0 R03G\_17238  
Query: 1 TGTATGACTTGGTAGTTTCACC 22  
|||||  
Sbjct: 202 ACATACTGAACCATCAAAGTGG 181

>miR167c-3p Score: 0.0 R03G\_16718  
Query: 1 TGTATGACTTGGTAGTTTCACC 22  
|||||  
Sbjct: 55 ACATACTGAACCATCAAAGTGG 34

>miR167c-3p Score: 0.0 R03G\_16690  
Query: 1 TGTATGACTTGGTAGTTTCACC 22  
|||||  
Sbjct: 55 ACATACTGAACCATCAAAGTGG 34

>miR167c-3p Score: 0.0 R03G\_15666  
Query: 1 TGTATGACTTGGTAGTTTCACC 22  
|||||  
Sbjct: 202 ACATACTGAACCATCAAAGTGG 181

>miR167c-3p Score: 0.0 R03G\_15140  
Query: 1 TGTATGACTTGGTAGTTTCACC 22  
|||||  
Sbjct: 55 ACATACTGAACCATCAAAGTGG 34

>miR167c-3p Score: 0.0 R03G\_15144  
Query: 1 TGTATGACTTGGTAGTTTCACC 22  
|||||  
Sbjct: 55 ACATACTGAACCATCAAAGTGG 34

>miR167c-3p Score: 0.0 R03G\_15148  
Query: 1 TGTATGACTTGGTAGTTTCACC 22  
|||||  
Sbjct: 55 ACATACTGAACCATCAAAGTGG 34

>miR167c-3p Score: 0.0 R03G\_14546

Query: 1 TGTATGACTTGGTAGTTTCACC 22  
|||||  
Sbjct: 151 ACATACTGAACCATCAAAGTGG 130  
>miR167c-3p Score: 0.0 R03G\_14561  
Query: 1 TGTATGACTTGGTAGTTTCACC 22  
|||||  
Sbjct: 202 ACATACTGAACCATCAAAGTGG 181  
>miR167c-3p Score: 1.0 R03G\_14720  
Query: 1 TGTATGACTTGGTAGTTTCACC 22  
|||||\*|  
Sbjct: 151 ACATACTTAACCATCAAAGTGG 130  
>miR167c-3p Score: 0.0 R03G\_13713  
Query: 1 TGTATGACTTGGTAGTTTCACC 22  
|||||  
Sbjct: 55 ACATACTGAACCATCAAAGTGG 34  
>miR167c-3p Score: 0.0 R03G\_13729  
Query: 1 TGTATGACTTGGTAGTTTCACC 22  
|||||  
Sbjct: 202 ACATACTGAACCATCAAAGTGG 181  
>miR167c-3p Score: 0.0 R03G\_13740  
Query: 1 TGTATGACTTGGTAGTTTCACC 22  
|||||  
Sbjct: 55 ACATACTGAACCATCAAAGTGG 34  
>miR167c-3p Score: 0.0 R03G\_13851  
Query: 1 TGTATGACTTGGTAGTTTCACC 22  
|||||  
Sbjct: 55 ACATACTGAACCATCAAAGTGG 34  
>miR167c-3p Score: 0.0 R03G\_12978  
Query: 1 TGTATGACTTGGTAGTTTCACC 22  
|||||  
Sbjct: 202 ACATACTGAACCATCAAAGTGG 181  
>miR167c-3p Score: 0.0 R03G\_13282  
Query: 1 TGTATGACTTGGTAGTTTCACC 22  
|||||  
Sbjct: 202 ACATACTGAACCATCAAAGTGG 181  
>miR167c-3p Score: 0.0 R03G\_10805  
Query: 1 TGTATGACTTGGTAGTTTCACC 22  
|||||  
Sbjct: 202 ACATACTGAACCATCAAAGTGG 181  
>miR167c-3p Score: 0.0 R03G\_09203  
Query: 1 TGTATGACTTGGTAGTTTCACC 22  
|||||  
Sbjct: 151 ACATACTGAACCATCAAAGTGG 130  
>miR167c-3p Score: 0.0 R03G\_08833  
Query: 1 TGTATGACTTGGTAGTTTCACC 22



Sbjct: 713 AGAACGAGGGAGAAGAAGAAGAA 691  
>miR2082 Score: 2.5 R03G\_15097  
Query: 1 TGTTGTTTCCTTCTTCTTCTT 22  
||:\*||||||||||||\*|||\*  
Sbjct: 1256 ACGAGAAGGAAGAAGAAAAGAC 1235  
>miR2082 Score: 2.5 R03G\_14402  
Query: 1 TGTTGTTTCCTTCTTCTTCTT 22  
||||||\*||||||\*||\*|||  
Sbjct: 1227 ACAACAAAGAAGAAGTAGCGAA 1206  
>miR2082 Score: 2.5 R03G\_13891  
Query: 1 TGTTGTTTCCTTCTTCTTC-TCTT 22  
||\*|||\*||||||||||\*|||  
Sbjct: 1140 ACCACACGGAAGAAGAAGAAGAA 1118  
>miR2082 Score: 2.5 R03G\_13935  
Query: 1 TGTTGTTTCCTTCTTCTTCT-CTT 22  
||:||||||||\*|||||\*\*||  
Sbjct: 1005 ACGACAAGGAAGTAGAAGATTAA 983  
>miR2082 Score: 2.5 R03G\_12789  
Query: 1 TGTTGTTTCCTTCTTCTTCTT 22  
||||||||\*|||\*||\*|||  
Sbjct: 80 ACAACAAGGTAGAAAAA-AGAA 60  
>miR2082 Score: 2.0 R03G\_13069  
Query: 1 TGTTGTTTCCTTCTTCTTCTT 22  
||||||\*||||||:|\*|||  
Sbjct: 962 ACAACAAAGAAGAAGGAAAGAA 941  
>miR2082 Score: 2.2 R03G\_13123  
Query: 1 TGTTGTTTCCTTCTTCTTCTT 22  
|:||||:|:||||||\*||:  
Sbjct: 834 ATAACAGGGGAGAAGAAGTGAG 813  
>miR2082 Score: 2.5 R03G\_12266  
Query: 1 TGTTGTTTCCTTCTTCTTCTT 22  
|\*||||\*||||||||||\*||  
Sbjct: 599 AAAACAAAGAAGAAGAAGAAAA 578  
>miR2082 Score: 2.5 R03G\_11023  
Query: 1 TGTTGTTTCCTTCTTCTTC-TCTT 22  
|||:|\*||||||||||\*|||  
Sbjct: 1515 ACAGTAAAGAAGAAGAAGAA 1493  
>miR2082 Score: 2.5 R03G\_09811  
Query: 1 TGTTGTTTCCTTCTTCTTCTT 22  
||:|:|\*||||||||||\*||  
Sbjct: 135 ACGATAAAGAAGAAGAAGAAAA 114  
>miR2082 Score: 2.5 R03G\_08027  
Query: 1 TGTTGTTTCCTTCTTCTTCTT 22  
|\*||||||||||||\*|||\*||  
Sbjct: 608 AGAACAAGGAAGAAAAAGAAAA 587

>miR2082 Score: 2.5 R03G\_09036  
Query: 1 TGTTGTTTCCTTCTTCTTC-TCTT 22  
|\*|||\*|||\*|||\*|||  
Sbjct: 477 AAAACAAAGAAGAAGAAGGAGAA 455

>miR2082 Score: 2.5 R03G\_06853  
Query: 1 TGTTGTTTCCTTCTTCTTCTT 22  
|\*||\*|||\*|||\*|||  
Sbjct: 1131 AAAAGAAGGAAGAAGAAAAGAA 1110

>miR2082 Score: 2.5 R03G\_06856  
Query: 1 TGTTGTTTCCTTCTTCTTCTT 22  
|\*||\*|||\*|||\*|||  
Sbjct: 552 AAAAGAAGGAAGAAGAAAAGAA 531

>miR2082 Score: 2.5 R03G\_07217  
Query: 1 TGTTGTTTCCTTCTTCTTC-TCTT 22  
|\*||\*|||\*|||\*|||  
Sbjct: 449 AGAAGAAGGAAGAAGAAGAA 427

>miR2082 Score: 2.5 R03G\_07516  
Query: 1 TGTTGTTTCCTTCTTCTTCTT 22  
\*|:|\*|||:|\*|||\*|||  
Sbjct: 1553 CCGAGAAGGAGGAAGAAGAGAA 1532

>miR2082 Score: 2.5 R03G\_05645  
Query: 1 TGTTGTTTCCTTCTTCTTC-TCTT 22  
|||\*|||\*|||\*|||\*|||  
Sbjct: 476 ACAAAAAGGAAGAACAAGAAGAA 454

>miR2082 Score: 2.0 R03G\_05980  
Query: 1 TGTTGTTTCCTTCTTCTTCTT 22  
||\*|:|\*|||\*|||\*|||\*|||  
Sbjct: 231 ACTATAAGGAAGAAGAAGAGAT 210

>miR2082 Score: 2.5 R03G\_06032  
Query: 1 TGTTGTTTCCTTCTTCTTCTT 22  
|:::|\*|||\*|||\*|||  
Sbjct: 405 ATGGTAAGGAAGAAGAA-AGAA 385

>miR2082 Score: 2.5 R03G\_06076  
Query: 1 TGTTGTTTCCTTCTTCTTCTT 22  
|:|\*|||\*|||\*|||\*|||  
Sbjct: 50 ATAACAAGGAGAAAGAGGAGAA 29

>miR2082 Score: 2.5 R03G\_06212  
Query: 1 TGTTGTTTCCTTCTTCTTCTT 22  
\*|||:|\*|||\*|||\*|||  
Sbjct: 379 TCAACGGGAAGAAGAGAAGAA 358

>miR2082 Score: 2.0 R03G\_06567  
Query: 1 TGTTGTTTCCTTCTTCTTCTT 22  
|||:|\*|||\*|||\*|||  
Sbjct: 641 ACAACGAAGAAGAAGAAGAA-AA 621

>miR2082 Score: 2.5 R03G\_02630

Query: 1 TGTTGTTTCCTTCTTCTTCTT 22  
|\*:\*|||  
Sbjct: 327 AAGAGAAGGAAGAAGAAGAGAA 306  
>miR2082 Score: 2.5 R03G\_03261  
Query: 1 TGTTGTTTCCTTCTTCTTCTT 22  
|||\*|||:|\*|||  
Sbjct: 36 ACAAAAAGGAAGGGGAACAGAA 15  
>miR2082 Score: 2.5 R03G\_03385  
Query: 1 TGTTGTTTCCTTCTTCTTCTT 22  
|\*|||\*|||\*||  
Sbjct: 1148 AAAACAAGGAAGAAAAGA-AA 1128  
>miR2082 Score: 2.5 R03G\_03704  
Query: 1 TGTTGTTTCCTTCTTCTTCTT 22  
|\*|||:|:|:|  
Sbjct: 158 AGAACAAGGAGGAGGAGAGAA 137  
>miR2082 Score: 2.0 R03G\_03818  
Query: 1 TGTTGTTTCCTTCTTCTTCTT 22  
|\*|||\*|||\*||  
Sbjct: 3617 AGAACAAGGAAGAAGAAAACGAA 3595  
>miR2082 Score: 2.5 R03G\_03958  
Query: 1 TGTTGTTTCCTTCTTCTTCTT 22  
||:|||\*|||\*||  
Sbjct: 188 ACGACAAAGAAGAAGAAAAAAA 167  
>miR7803b-3p Score: 0.5 R03G\_17223  
Query: 1 TGACACGTCGTCAATCATGTACT 23  
|||:|||  
Sbjct: 157 ACTGTGCAGCGGTTAGTACATGA 135  
>miR7803b-3p Score: 0.5 R03G\_17017  
Query: 1 TGACACGTCGTCAATCATGTACT 23  
|||:|||  
Sbjct: 433 ACTGTGCAGCGGTTAGTACATGA 411  
>miR7803b-3p Score: 0.5 R03G\_16725  
Query: 1 TGACACGTCGTCAATCATGTACT 23  
|||:|||  
Sbjct: 175 ACTGTGCAGCGGTTAGTACATGA 153  
>miR7803b-3p Score: 1.0 R03G\_16742  
Query: 1 TGACACGTCGTCAATCATGTACT 23  
|:|||:|||  
Sbjct: 433 ATTGTGCAGCGGTTAGTACATGA 411  
>miR7803b-3p Score: 0.8 R03G\_16698  
Query: 1 TGACACGTCGTCAATCATGTACT 23  
:|||:|||  
Sbjct: 430 GCTGTGCAGCGGTTAGTACATGA 408  
>miR7803b-3p Score: 1.0 R03G\_16706  
Query: 1 TGACACGTCGTCAATCATGTACT 23

|:|||||||:|||||||  
Sbjct: 157 ATTGTGCAGCGGTTAGTACATGA 135  
>miR7803b-3p Score: 1.0 R03G\_16372  
Query: 1 TGACACGTCGTCAATCATGTACT 23  
|:|||||||:|||||||  
Sbjct: 433 ATTGTGCAGCGGTTAGTACATGA 411  
>miR7803b-3p Score: 0.5 R03G\_16383  
Query: 1 TGACACGTCGTCAATCATGTACT 23  
|||||||:|||||||  
Sbjct: 433 ACTGTGCAGCGGTTAGTACATGA 411  
>miR7803b-3p Score: 0.5 R03G\_16420  
Query: 1 TGACACGTCGTCAATCATGTACT 23  
|||||||:|||||||  
Sbjct: 184 ACTGTGCAGCGGTTAGTACATGA 162  
>miR7803b-3p Score: 0.5 R03G\_16123  
Query: 1 TGACACGTCGTCAATCATGTACT 23  
|||||||:|||||||  
Sbjct: 433 ACTGTGCAGCGGTTAGTACATGA 411  
>miR7803b-3p Score: 0.5 R03G\_15271  
Query: 1 TGACACGTCGTCAATCATGTACT 23  
|||||||:|||||||  
Sbjct: 433 ACTGTGCAGCGGTTAGTACATGA 411  
>miR7803b-3p Score: 0.5 R03G\_15282  
Query: 1 TGACACGTCGTCAATCATGTACT 23  
|||||||:|||||||  
Sbjct: 157 ACTGTGCAGCGGTTAGTACATGA 135  
>miR7803b-3p Score: 0.5 R03G\_15261  
Query: 1 TGACACGTCGTCAATCATGTACT 23  
|||||||:|||||||  
Sbjct: 433 ACTGTGCAGCGGTTAGTACATGA 411  
>miR7803b-3p Score: 1.8 R03G\_14770  
Query: 1 TGACACGTCGTCAATCATGTACT 23  
:\*|||||||:|||||||  
Sbjct: 433 GCCGTGCAGCGGTTAGTACATGA 411  
>miR7803b-3p Score: 1.0 R03G\_13714  
Query: 1 TGACACGTCGTCAATCATGTACT 23  
|:|||||||:|||||||  
Sbjct: 433 ATTGTGCAGCGGTTAGTACATGA 411  
>miR7803b-3p Score: 0.5 R03G\_13852  
Query: 1 TGACACGTCGTCAATCATGTACT 23  
|||||||:|||||||  
Sbjct: 184 ACTGTGCAGCGGTTAGTACATGA 162  
>miR7803b-3p Score: 1.0 R03G\_12663  
Query: 1 TGACACGTCGTCAATCATGTACT 23  
|:|||||||:|||||||



Sbjct: 268 ATTGTGCAGCGGTTAGTACATGA 246  
>miR7803b-3p Score: 0.5 R03G\_11962  
Query: 1 TGACACGTCGTCAATCATGTACT 23  
|||||||:|||||||  
Sbjct: 157 ACTGTGCAGCGGTTAGTACATGA 135  
>miR7803b-3p Score: 0.8 R03G\_12537  
Query: 1 TGACACGTCGTCAATCATGTACT 23  
:|||||||:|||||||  
Sbjct: 184 GCTGTGCAGCGGTTAGTACATGA 162  
>miR7803b-3p Score: 1.5 R03G\_10771  
Query: 1 TGACACGTCGTCAATCATGTACT 23  
|||||||:||||\*|||||  
Sbjct: 184 ACTGTGCAGCGGTTAATACATGA 162  
>miR7803b-3p Score: 0.5 R03G\_10795  
Query: 1 TGACACGTCGTCAATCATGTACT 23  
|||||||:|||||||  
Sbjct: 433 ACTGTGCAGCGGTTAGTACATGA 411  
>miR7803b-3p Score: 1.0 R03G\_09193  
Query: 1 TGACACGTCGTCAATCATGTACT 23  
|:|||||||:|||||||  
Sbjct: 157 ATTGTGCAGCGGTTAGTACATGA 135  
>miR7803b-3p Score: 1.8 R03G\_07984  
Query: 1 TGACACGTCGTCAATCATGTACT 23  
:\*|||||||:|||||||  
Sbjct: 433 GCCGTGCAGCGGTTAGTACATGA 411  
>miR7803b-3p Score: 0.5 R03G\_06735  
Query: 1 TGACACGTCGTCAATCATGTACT 23  
|||||||:|||||||  
Sbjct: 157 ACTGTGCAGCGGTTAGTACATGA 135  
>miR7803b-3p Score: 0.5 R03G\_07137  
Query: 1 TGACACGTCGTCAATCATGTACT 23  
|||||||:|||||||  
Sbjct: 433 ACTGTGCAGCGGTTAGTACATGA 411  
>miR7803b-3p Score: 0.5 R03G\_07702  
Query: 1 TGACACGTCGTCAATCATGTACT 23  
|||||||:|||||||  
Sbjct: 184 ACTGTGCAGCGGTTAGTACATGA 162  
>miR7803b-3p Score: 0.5 R03G\_07705  
Query: 1 TGACACGTCGTCAATCATGTACT 23  
|||||||:|||||||  
Sbjct: 433 ACTGTGCAGCGGTTAGTACATGA 411  
>miR7803b-3p Score: 1.5 R03G\_07739  
Query: 1 TGACACGTCGTCAATCATGTACT 23  
||||||\*||:|||||||  
Sbjct: 184 ACTGTGCTGCGGTTAGTACATGA 162

>miR7803b-3p Score: 0.5 R03G\_07867  
Query: 1 TGACACGTCGTCAATCATGTACT 23  
|||||||:|||||||  
Sbjct: 184 ACTGTGCAGCGGTTAGTACATGA 162

>miR7803b-3p Score: 0.5 R03G\_05521  
Query: 1 TGACACGTCGTCAATCATGTACT 23  
|||||||\*  
Sbjct: 312 ACTGTGCAGCAGTTAGTACATGC 290

>miR7803b-3p Score: 0.5 R03G\_06433  
Query: 1 TGACACGTCGTCAATCATGTACT 23  
|||||||:|||||||  
Sbjct: 157 ACTGTGCAGCGGTTAGTACATGA 135

>miR7803b-3p Score: 0.5 R03G\_06717  
Query: 1 TGACACGTCGTCAATCATGTACT 23  
|||||||:|||||||  
Sbjct: 433 ACTGTGCAGCGGTTAGTACATGA 411

>miR7803b-3p Score: 0.5 R03G\_04674  
Query: 1 TGACACGTCGTCAATCATGTACT 23  
|||||||:|||||||  
Sbjct: 184 ACTGTGCAGCGGTTAGTACATGA 162

>miR7803b-3p Score: 1.0 R03G\_04682  
Query: 1 TGACACGTCGTCAATCATGTACT 23  
|:|||||||:|||||||  
Sbjct: 433 ATTGTGCAGCGGTTAGTACATGA 411

>miR7803b-3p Score: 0.5 R03G\_04695  
Query: 1 TGACACGTCGTCAATCATGTACT 23  
|||||||:|||||||  
Sbjct: 223 ACTGTGCAGCGGTTAGTACATGA 201

>miR7803b-3p Score: 0.5 R03G\_05268  
Query: 1 TGACACGTCGTCAATCATGTACT 23  
|||||||:|||||||  
Sbjct: 433 ACTGTGCAGCGGTTAGTACATGA 411

>miR7803b-3p Score: 1.0 R03G\_02824  
Query: 1 TGACACGTCGTCAATCATGTACT 23  
|:|||||||:|||||||  
Sbjct: 433 ATTGTGCAGCGGTTAGTACATGA 411

>miR7803b-3p Score: 0.8 R03G\_00238  
Query: 1 TGACACGTCGTCAATCATGTACT 23  
:|||||||:|||||||  
Sbjct: 433 GCTGTGCAGCGGTTAGTACATGA 411

>miR7803b-3p Score: 0.8 R03G\_01205  
Query: 1 TGACACGTCGTCAATCATGTACT 23  
:|||||||:|||||||  
Sbjct: 433 GCTGTGCAGCGGTTAGTACATGA 411

>miR7803b-3p Score: 0.5 R03G\_01328



\*||||:||||\*|||||||\*  
Sbjct: 1732 TTTCATTTCTTACAGGAAG 1714  
>miR5758 Score: 0.0 R03G\_09539  
Query: 1 TAAGTGAAGAATGTCCTTG 19  
|||||||  
Sbjct: 2527 ATTCACCTTCTTACAGGAAC 2509  
>miR5758 Score: 2.2 R03G\_09046  
Query: 1 TAAGTGAAGAATGTCCTTG 19  
:||:||||\*||:||||  
Sbjct: 255 GTTACTTCTTACGGGAAC 237  
>miR5758 Score: 2.5 R03G\_07962  
Query: 1 TAAGTGAAGAATGTCCTTG 19  
||:||\*||\*|||||||  
Sbjct: 34 ATTTACATCTAACAGGAAC 16  
>miR5758 Score: 2.0 R03G\_03267  
Query: 1 TAAGTGAAGAATGTCCTTG 19  
:||||||:||:||||\*:  
Sbjct: 811 GTTCACTTTTTATAGGA-T 794  
>miR5758 Score: 1.0 R03G\_03627  
Query: 1 TAAGTGAAGAATGTCCTTG 19  
|\*|||||||  
Sbjct: 544 AGTCACTTCTTACAGGAAC 526  
>miR5758 Score: 1.0 R03G\_01708  
Query: 1 TAAGTGAAGAATGTCCTTG 19  
|\*|||||||  
Sbjct: 544 AGTCACTTCTTACAGGAAC 526  
>miR5758 Score: 2.5 R03G\_01900  
Query: 1 TAAGTGAAGAATGTCCTTG 19  
\*|||||||:||\*|\*|  
Sbjct: 260 TTTCACCTTCTTATAGAA-C 243  
>miR5758 Score: 2.5 R03G\_02110  
Query: 1 TAAGTGAAGAATGTCCTTG 19  
||\*|||||\*|||||||\*  
Sbjct: 781 ATCCACTTCTTACAGGAAG 763  
>miR5038a Score: 2.0 R03G\_16707  
Query: 1 TGGGAATCTTGGCCTTTTCCA 21  
|:||\*|||||||\*|  
Sbjct: 652 ATCCCTAGAACCGGAAAAGCT 632  
>miR5038a Score: 2.5 R03G\_14583  
Query: 1 TGGGAATCTTGGCCTTTT-CCA 21  
||||\*|||||||:|\*\*||  
Sbjct: 697 ACCCATAGAACCGGAAGAACGT 676  
>miR5038a Score: 2.0 R03G\_13744  
Query: 1 TGGGAATCTTGGCCTTTTCCA 21  
|:||\*|||||||\*|

Sbjct: 652 ATCCCTAGAACCGGAAAAGCT 632  
>miR5038a Score: 0.0 R03G\_12668  
Query: 1 TGGGAATCTTGGCCTTTTCCA 21  
|||||

Sbjct: 565 ACCCTTAGAACCGGAAAAGGT 545  
>miR5038a Score: 0.0 R03G\_12962  
Query: 1 TGGGAATCTTGGCCTTTTCCA 21  
|||||

Sbjct: 652 ACCCTTAGAACCGGAAAAGGT 632  
>miR5038a Score: 2.0 R03G\_12965  
Query: 1 TGGGAATCTTGGCCTTTTCCA 21  
|:|\*|

Sbjct: 454 ATCCCTAGAACCGGAAAAGCT 434  
>miR5038a Score: 2.0 R03G\_12074  
Query: 1 TGGGAATCTTGGCCTTTTCCA 21  
|:|\*|

Sbjct: 652 ATCCCTAGAACCGGAAAAGCT 632  
>miR5038a Score: 1.2 R03G\_11954  
Query: 1 TGGGAATCTTGGCCTTTTCCA 21  
::|

Sbjct: 652 GTCCTTAGAACCGGAAAAGCT 632  
>miR5038a Score: 2.5 R03G\_10341  
Query: 1 TGGGAATCTTGGCCTTTTCCA 21  
\*:|||:|

Sbjct: 1261 TTCCTTGAACCGGAGAAAGT 1241  
>miR5038a Score: 0.0 R03G\_09928  
Query: 1 TGGGAATCTTGGCCTTTTCCA 21  
|||||

Sbjct: 652 ACCCTTAGAACCGGAAAAGGT 632  
>miR5038a Score: 2.5 R03G\_08982  
Query: 1 TGGGAATCTTGGCCTTTTCCA 21  
|||:|

Sbjct: 1094 ACCTTTAGAAGTGGAAAAGGC 1074  
>miR5038a Score: 2.0 R03G\_05525  
Query: 1 TGGGAATCTTGGCCTTTTCCA 21  
|:|\*|

Sbjct: 652 ATCCCTAGAACCGGAAAAGCT 632  
>miR5038a Score: 2.0 R03G\_05924  
Query: 1 TGGGAATCTTGGCCTTTTCCA 21  
|:|\*|

Sbjct: 652 ATCCCTAGAACCGGAAAAGCT 632  
>miR5038a Score: 0.0 R03G\_05926  
Query: 1 TGGGAATCTTGGCCTTTTCCA 21  
|||||

Sbjct: 652 ACCCTTAGAACCGGAAAAGGT 632



Query: 1 TGAATGGGGATGAGAGGAGG 21  
||:||||:|||||||:|:|:|  
Sbjct: 298 ACTTTATCCCTACTTTTCTTC 278  
>miR528-5p Score: 2.5 R03G\_05148  
Query: 1 TGAATGGGGATGAGAGGAGG 21  
\*|||||:|||||||\*||\*||  
Sbjct: 420 TCCTTATCCCTACTGTCCACC 400  
>miR7716-5p Score: 0.5 R03G\_15587  
Query: 1 TAGTTGATAAGTAAGAACGAGAC 23  
|||:|||||||  
Sbjct: 234 ATCGACTATTCATTCTTGCTCTG 212  
>miR7716-5p Score: 2.2 R03G\_13422  
Query: 1 TAGTTGATAAGTAAGAACGAGAC 23  
|\*|||||||\*|:|\*|  
Sbjct: 263 AGCAACTATTCATTCTTG-TTAG 242  
>miR7716-5p Score: 1.5 R03G\_08791  
Query: 1 TAGTTGATAAGTAAGAACGAGAC 23  
|||||||\*|  
Sbjct: 150 ATCAACTATTCGGTCTTGCTCTG 128  
>miR482e Score: 2.5 R03G\_00068  
Query: 1 TTGCCTATTCCTCTGCCAAG 20  
|||||||\*||\*\*  
Sbjct: 296 AACGGATAAGGAGGAGGTGG 277  
>miR5766 Score: 2.0 R03G\_16408  
Query: 1 TTAGGCAGAGGAATAGGCAAG 21  
||\*||\*|  
Sbjct: 1091 AACCTTCTCCTTATCCGTTC 1071  
>miR5766 Score: 0.5 R03G\_15259  
Query: 1 TTAGGCAGAGGAATAGGCAAG 21  
|||||||\*|||  
Sbjct: 1091 AATCCGTCTCCTTATCCATTC 1071  
>miR5766 Score: 0.0 R03G\_12958  
Query: 1 TTAGGCAGAGGAATAGGCAAG 21  
|||||||  
Sbjct: 911 AATCCGTCTCCTTATCCGTTC 891  
>miR5766 Score: 0.0 R03G\_12973  
Query: 1 TTAGGCAGAGGAATAGGCAAG 21  
|||||||  
Sbjct: 1091 AATCCGTCTCCTTATCCGTTC 1071  
>miR5766 Score: 0.0 R03G\_12650  
Query: 1 TTAGGCAGAGGAATAGGCAAG 21  
|||||||  
Sbjct: 1091 AATCCGTCTCCTTATCCGTTC 1071  
>miR5766 Score: 0.5 R03G\_11778  
Query: 1 TTAGGCAGAGGAATAGGCAAG 21

```
|||||*|||
Sbjct: 1091 AATCCGTCTCCTTATCCATTC 1071
>miR5766 Score: 0.0 R03G_07982
Query: 1 TTAGGCAGAGGAATAGGCAAG 21
|||||
Sbjct: 1091 AATCCGTCTCCTTATCCGTTT 1071
>miR5766 Score: 0.0 R03G_08650
Query: 1 TTAGGCAGAGGAATAGGCAAG 21
|||||
Sbjct: 1091 AATCCGTCTCCTTATCCGTTT 1071
>miR5766 Score: 0.0 R03G_08655
Query: 1 TTAGGCAGAGGAATAGGCAAG 21
|||||
Sbjct: 1091 AATCCGTCTCCTTATCCGTTT 1071
>miR5766 Score: 0.0 R03G_07035
Query: 1 TTAGGCAGAGGAATAGGCAAG 21
|||||
Sbjct: 1091 AATCCGTCTCCTTATCCGTTT 1071
>miR5766 Score: 0.0 R03G_05217
Query: 1 TTAGGCAGAGGAATAGGCAAG 21
|||||
Sbjct: 1091 AATCCGTCTCCTTATCCGTTT 1071
>miR5766 Score: 0.0 R03G_02849
Query: 1 TTAGGCAGAGGAATAGGCAAG 21
|||||
Sbjct: 1091 AATCCGTCTCCTTATCCGTTT 1071
>miR5766 Score: 0.0 R03G_02851
Query: 1 TTAGGCAGAGGAATAGGCAAG 21
|||||
Sbjct: 1091 AATCCGTCTCCTTATCCGTTT 1071
>miR5766 Score: 2.5 R03G_03289
Query: 1 TTAGGCAGAGGAATAGGCAAG 21
*:|||:|:|:|
Sbjct: 998 CGTCCGTTTTCTTGTCCGTTT 978
>miR5766 Score: 0.0 R03G_00697
Query: 1 TTAGGCAGAGGAATAGGCAAG 21
|||||
Sbjct: 1091 AATCCGTCTCCTTATCCGTTT 1071
>miR5766 Score: 0.0 R03G_01965
Query: 1 TTAGGCAGAGGAATAGGCAAG 21
|||||
Sbjct: 1091 AATCCGTCTCCTTATCCGTTT 1071
>miR5766 Score: 0.0 R03G_17425
Query: 1 TTAGGCAGAGGAATAGGCAAG 21
|||||
```



Sbjct: 1091 AATCCGTCTCCTTATCCGTTTC 1071  
>miR7763-5p Score: 2.0 R03G\_05488  
Query: 1 AACTTCATCGTGCTGGGGATAG 22  
|||||||:|\*|||\*|||  
Sbjct: 1829 TTGAAGTAGTACTACCCCAATC 1808  
>miR7763-5p Score: 2.0 R03G\_00708  
Query: 1 AACTTCATCGTGCTGGGGATAG 22  
|||||||:|\*|||\*|||  
Sbjct: 1760 TTGAAGTAGTACTACCCCAATC 1739  
>miR5227 Score: 2.5 R03G\_17229  
Query: 1 TGAAGAAGAAGAAGTTGAGGAT 22  
\*:|||||||\*|||\*|  
Sbjct: 504 CTTTCTTCTTCTTCCACTCC-A 484  
>miR5227 Score: 2.5 R03G\_12224  
Query: 1 TGAAGAAGAAGAAGTTGA-GGAT 22  
|||||\*|||||||\*\*\*|||  
Sbjct: 1289 ACTTCTGCTTCTTCAACAAACTA 1267  
>miR5227 Score: 2.0 R03G\_10883  
Query: 1 TGAAGAAGAAGAAGTTGAGGAT 22  
|:|\*|||||||\*|  
Sbjct: 759 ATTCCTTCTTCTTCAACTCC-A 739  
>miR5227 Score: 1.0 R03G\_10898  
Query: 1 TGAAGAAGAAGAAGTTGAGG-AT 22  
|||||||:|||||\*||  
Sbjct: 129 ACTTCTTCTTCTTAACTCCTTA 107  
>miR5227 Score: 2.0 R03G\_11015  
Query: 1 TGAAGAAGAAGAAGTTGA-GGAT 22  
|:|||||||:|\*|||:  
Sbjct: 42 ATTTCTTCTTCTTTCAGCTATCTG 20  
>miR5227 Score: 2.5 R03G\_11040  
Query: 1 TGAAGAAGAAGAAGTTGAGGAT 22  
|||||||\*|||\*|||\*|||  
Sbjct: 93 ACTTCTTCTACTTGAAC-CCTA 73  
>miR5227 Score: 2.2 R03G\_09917  
Query: 1 TGAAGAAGAAGAAGTTGAGGAT 22  
\*|||:|||||||\*||:|||  
Sbjct: 705 TCTTTTCTTCTTTCACCTTCTA 684  
>miR5227 Score: 2.0 R03G\_10043  
Query: 1 TGAAGAAGAAGAAGTTGAGGAT 22  
\*|||||||:|||\*|||:  
Sbjct: 957 CCTTCTTCTTCTTTCGACT-TTG 937  
>miR5227 Score: 2.5 R03G\_07000  
Query: 1 TGAAGAAGAAGAAGTTGAGGAT 22  
\*|||||||\*|||\*|||\*|||  
Sbjct: 192 TCTTCTTCTTCTTCTTCTCCTA 171

>miR5227 Score: 2.5 R03G\_07001  
Query: 1 TGAAGAAGAAGAAGTTGAGGAT 22  
\*|||||\*|||||  
Sbjct: 192 TCTTCTTCTTCTTCTTCTCCTA 171

>miR5227 Score: 2.5 R03G\_07279  
Query: 1 TGAAGAAGAAGAAGTTGAGGAT 22  
|||\*|||||:|||||  
Sbjct: 3594 ACTCCTTCTTCTTCGCCTCCTA 3573

>miR5227 Score: 2.0 R03G\_05565  
Query: 1 TGAAGAAGAAGAAGTTGAGGAT 22  
|||||\*||\*||\*  
Sbjct: 684 ACTTCTTCTTCTTCCACACCTC 663

>miR5227 Score: 2.2 R03G\_06171  
Query: 1 TGAAGAAGAAGAAGTTGA-GGAT 22  
\*|||\*|||||\*|||  
Sbjct: 216 TCTTGTTCTTCTTCAACTTTCTA 194

>miR5227 Score: 1.5 R03G\_06538  
Query: 1 TGAAGAAGAAGAAGTTGA-GGAT 22  
\*|||||\*||\*  
Sbjct: 1151 CCTTCTTCTTCAACTCCCTC 1129

>miR5227 Score: 2.2 R03G\_03357  
Query: 1 TGAAGAAGAAGAAGTTGAGGAT 22  
\*|||||\*|||:||\*  
Sbjct: 69 TCTTCTTCTTCTTGAATTCTT 48

>miR5227 Score: 2.5 R03G\_03738  
Query: 1 TGAAGAAGAAGAAGTTGAGGAT 22  
|||||\*||\*|||  
Sbjct: 1782 ACTTCTTCTTCTTCGTCGACTA 1761

>miR5227 Score: 2.5 R03G\_00057  
Query: 1 TGAAGAAGAAGAAGTTGAGGAT 22  
|||:|||||:|\*|||  
Sbjct: 1677 ACTTTTCTTCTTCGAGACCTA 1656

>miR5227 Score: 2.5 R03G\_01232  
Query: 1 TGAAGAAGAAGAAGTTGA-GGAT 22  
\*|||||\*||\*|\*|  
Sbjct: 189 CCTTCTTCTTCTTCAGCTAGCCA 167

>miR5227 Score: 2.5 R03G\_01236  
Query: 1 TGAAGAAGAAGAAGTTGA-GGAT 22  
\*|||||\*||\*|\*|  
Sbjct: 189 CCTTCTTCTTCTTCAGCTAGCCA 167

>miR5227 Score: 2.2 R03G\_01458  
Query: 1 TGAAGAAGAAGAAGTTGAGGAT 22  
\*|||||\*||:||\*  
Sbjct: 879 TCTTCTTCTTCTTCATCTTCTC 858

>miR823-5p Score: 2.2 R03G\_02988

Query: 1 TTTGTATTGATCACTGACCATT 22  
|||||||:|||||\*|:\*  
Sbjct: 234 AACATAACTGGTGGCTGTTGT 213  
>miR823-5p Score: 2.5 R03G\_01483  
Query: 1 TTTGTATTGATCACTGACCATT 22  
|\*|:|||||||\*|||  
Sbjct: 570 ATATGTAAGTACTGACTGTAA 549  
>miR2644 Score: 2.2 R03G\_13025  
Query: 1 TCTCTTCAGTTGATGGTT-GT 20  
|||||:|||||||\*:\*||  
Sbjct: 2033 AGAGAGGTCAACTACCTGACA 2013  
>miR2644 Score: 2.2 R03G\_12411  
Query: 1 TCTCTTCAGTTGATGGTTGT 20  
:\*|||||:|||||||\*|  
Sbjct: 979 GAAGAAGTAACTACCAA-A 961  
>miR2644 Score: 2.5 R03G\_11845  
Query: 1 TCTCTTCAGTTGATGGTTGT 20  
||\*||||\*||||||\*||  
Sbjct: 472 AGTGAAGTGAAGTACCAA-CA 454  
>miR2644 Score: 2.5 R03G\_09501  
Query: 1 TCTCTTCAGTTGATGGTTGT 20  
\*|||||||:|:||||||\*|  
Sbjct: 175 TGAGAAGTTGATTACCAA-A 157  
>miR2644 Score: 2.5 R03G\_07648  
Query: 1 TCTCTTCAGTTGATGGTT-GT 20  
\*|\*|||||:|||||||\*||  
Sbjct: 661 CGTGAAGTCGACTACCAAACA 641  
>miR2644 Score: 1.5 R03G\_06059  
Query: 1 TCTCTTCAGTTGATGGTTGT 20  
|\*|||||||:|||||  
Sbjct: 1018 AAAGAAGTCAACTACTAACA 999  
>miR2644 Score: 2.5 R03G\_04985  
Query: 1 TCTCTTCAGTTGATGGTTGT 20  
\*|||||||\*|:||||:|||  
Sbjct: 322 TGAGAAGTCATTTACCGACA 303  
>miR2644 Score: 2.5 R03G\_00074  
Query: 1 TCTCTTCAGTTGATGGTTGT 20  
||||\*|||||:||\*|||||  
Sbjct: 475 AGAGATGTCAATTAACAACA 456  
>miR2644 Score: 1.5 R03G\_00272  
Query: 1 TCTCTTCAGTTGATGGTTGT 20  
\*|:|||||||\*|||  
Sbjct: 5305 CGGGAAGTCAACTACCAA-CA 5287  
>miR2644 Score: 2.5 R03G\_01873  
Query: 1 TCTCTTCAGTTGATGGTTGT 20



Sbjct: 315 TAACTAGTTCTACACTTCA 297  
>miR1917 Score: 2.5 R03G\_10660  
Query: 1 ATTGATCAAGGTCTAAAGT 19  
\*:|||||||\*  
Sbjct: 1204 GGTCTAGTTCCAGATTTCT 1186  
>miR1917 Score: 2.2 R03G\_08230  
Query: 1 ATTGATCAAGGTCTAAAGT 19  
||\*||\*|||:|  
Sbjct: 260 TATCTACTTCCAGATTTTA 242  
>miR1917 Score: 2.5 R03G\_06399  
Query: 1 ATTGATCAAGGTCTAAAGT 19  
||||:||||:||||\*|\*|  
Sbjct: 3103 TAACTGGTTCTAGATGT-A 3086  
>miR1917 Score: 2.0 R03G\_02427  
Query: 1 ATTGATCAAGGTCTAAAGT 19  
\*||||\*|||\*|  
Sbjct: 683 AACTACTTCCAGATTT-A 666  
>miR1917 Score: 2.2 R03G\_02854  
Query: 1 ATTGATCAAGGTCTAAAGT 19  
||||||\*||\*|:|  
Sbjct: 889 TAACTAGTTGCAGATGTTA 871  
>miR1917 Score: 2.5 R03G\_03973  
Query: 1 ATTGATCAAGGTCTAAAGT 19  
||\*|||||:|\*|||  
Sbjct: 684 TATCTAGTTCTATATTTCA 666  
>miR1917 Score: 2.5 R03G\_00170  
Query: 1 ATTGATCAAGGTCTAAAGT 19  
\*||||||\*|||:||\*|  
Sbjct: 4480 GAACTAGTTACAGGTTT-A 4463  
>miR1917 Score: 2.0 R03G\_00502  
Query: 1 ATTGATCAAGGTCTAAAGT 19  
||:|||||||:||\*||  
Sbjct: 261 TAGCTAGTTCCAGGTT-CA 244  
>miR1917 Score: 2.2 R03G\_01687  
Query: 1 ATTGATCAAGGTCTAAAGT 19  
|||:|||||:||\*|||:  
Sbjct: 231 TAATTAGTTCTAGTTTTCG 213  
>miR1857-5p Score: 2.2 R03G\_14280  
Query: 1 TGGATTCTTTTGGAGATGCGG 21  
|||||||:|\*|||:  
Sbjct: 49 ACCTAAGAAAACCTTTAACGTC 29  
>miR1857-5p Score: 2.2 R03G\_12733  
Query: 1 TGGATTCTTTTGGAGATGCGG 21  
::|||||||:||\*|::  
Sbjct: 426 GTCTAAGAAAACCTTTA-GTT 407



Query: 1 TGATGAAGAAGTGGCGCAGAAGA 23  
|||||  
Sbjct: 2147 ACTACTTCTTCACCGCGTCTTCT 2125  
>miR5293 Score: 0.0 R03G\_12677

Query: 1 TGATGAAGAAGTGGCGCAGAAGA 23  
|||||  
Sbjct: 2846 ACTACTTCTTCACCGCGTCTTCT 2824  
>miR5293 Score: 0.0 R03G\_12527

Query: 1 TGATGAAGAAGTGGCGCAGAAGA 23  
|||||  
Sbjct: 3011 ACTACTTCTTCACCGCGTCTTCT 2989  
>miR5293 Score: 0.0 R03G\_12532

Query: 1 TGATGAAGAAGTGGCGCAGAAGA 23  
|||||  
Sbjct: 2852 ACTACTTCTTCACCGCGTCTTCT 2830  
>miR5293 Score: 0.0 R03G\_12538

Query: 1 TGATGAAGAAGTGGCGCAGAAGA 23  
|||||  
Sbjct: 2903 ACTACTTCTTCACCGCGTCTTCT 2881  
>miR5293 Score: 0.0 R03G\_10804

Query: 1 TGATGAAGAAGTGGCGCAGAAGA 23  
|||||  
Sbjct: 2852 ACTACTTCTTCACCGCGTCTTCT 2830  
>miR5293 Score: 0.0 R03G\_09493

Query: 1 TGATGAAGAAGTGGCGCAGAAGA 23  
|||||  
Sbjct: 1670 ACTACTTCTTCACCGCGTCTTCT 1648  
>miR5293 Score: 0.0 R03G\_09547

Query: 1 TGATGAAGAAGTGGCGCAGAAGA 23  
|||||  
Sbjct: 2846 ACTACTTCTTCACCGCGTCTTCT 2824  
>miR5293 Score: 1.5 R03G\_08830

Query: 1 TGATGAAGAAGTGGCGCAGAAGA 23  
|||||:|||||  
Sbjct: 125 ACTACTTCTTCACTACGTCTTCT 103  
>miR5293 Score: 0.0 R03G\_07311

Query: 1 TGATGAAGAAGTGGCGCAGAAGA 23  
|||||  
Sbjct: 2852 ACTACTTCTTCACCGCGTCTTCT 2830  
>miR5293 Score: 0.0 R03G\_06425

Query: 1 TGATGAAGAAGTGGCGCAGAAGA 23  
|||||  
Sbjct: 2846 ACTACTTCTTCACCGCGTCTTCT 2824  
>miR5293 Score: 0.0 R03G\_04933

Query: 1 TGATGAAGAAGTGGCGCAGAAGA 23

|||||  
Sbjct: 2846 ACTACTTCTTCACCGCGTCTTCT 2824  
>miR5293 Score: 0.0 R03G\_05330  
Query: 1 TGATGAAGAAGTGGCGCAGAAGA 23  
|||||  
Sbjct: 2846 ACTACTTCTTCACCGCGTCTTCT 2824  
>miR5293 Score: 0.0 R03G\_05344  
Query: 1 TGATGAAGAAGTGGCGCAGAAGA 23  
|||||  
Sbjct: 2672 ACTACTTCTTCACCGCGTCTTCT 2650  
>miR5293 Score: 0.0 R03G\_05515  
Query: 1 TGATGAAGAAGTGGCGCAGAAGA 23  
|||||  
Sbjct: 1841 ACTACTTCTTCACCGCGTCTTCT 1819  
>miR5293 Score: 0.0 R03G\_02704  
Query: 1 TGATGAAGAAGTGGCGCAGAAGA 23  
|||||  
Sbjct: 2846 ACTACTTCTTCACCGCGTCTTCT 2824  
>miR5293 Score: 0.0 R03G\_02821  
Query: 1 TGATGAAGAAGTGGCGCAGAAGA 23  
|||||  
Sbjct: 3011 ACTACTTCTTCACCGCGTCTTCT 2989  
>miR5293 Score: 0.0 R03G\_03619  
Query: 1 TGATGAAGAAGTGGCGCAGAAGA 23  
|||||  
Sbjct: 2738 ACTACTTCTTCACCGCGTCTTCT 2716  
>miR5293 Score: 0.0 R03G\_03769  
Query: 1 TGATGAAGAAGTGGCGCAGAAGA 23  
|||||  
Sbjct: 776 ACTACTTCTTCACCGCGTCTTCT 754  
>miR5293 Score: 0.0 R03G\_03778  
Query: 1 TGATGAAGAAGTGGCGCAGAAGA 23  
|||||  
Sbjct: 2804 ACTACTTCTTCACCGCGTCTTCT 2782  
>miR5293 Score: 0.0 R03G\_04126  
Query: 1 TGATGAAGAAGTGGCGCAGAAGA 23  
|||||  
Sbjct: 3005 ACTACTTCTTCACCGCGTCTTCT 2983  
>miR5293 Score: 0.0 R03G\_00241  
Query: 1 TGATGAAGAAGTGGCGCAGAAGA 23  
|||||  
Sbjct: 1136 ACTACTTCTTCACCGCGTCTTCT 1114  
>miR5293 Score: 0.0 R03G\_00296  
Query: 1 TGATGAAGAAGTGGCGCAGAAGA 23  
|||||



Sbjct: 1136 ACTACTTCTTCACCGCGTCTTCT 1114  
>miR5293 Score: 0.0 R03G\_01614  
Query: 1 TGATGAAGAAGTGGCGCAGAAGA 23  
|||||  
Sbjct: 2852 ACTACTTCTTCACCGCGTCTTCT 2830  
>miR5293 Score: 0.0 R03G\_01936  
Query: 1 TGATGAAGAAGTGGCGCAGAAGA 23  
|||||  
Sbjct: 2852 ACTACTTCTTCACCGCGTCTTCT 2830  
>miR5293 Score: 0.0 R03G\_01964  
Query: 1 TGATGAAGAAGTGGCGCAGAAGA 23  
|||||  
Sbjct: 1322 ACTACTTCTTCACCGCGTCTTCT 1300  
>miR5293 Score: 0.0 R03G\_17422  
Query: 1 TGATGAAGAAGTGGCGCAGAAGA 23  
|||||  
Sbjct: 2147 ACTACTTCTTCACCGCGTCTTCT 2125  
>miR535d Score: 2.5 R03G\_15968  
Query: 1 TGAACGACGATAGAGAGCAC 20  
|||\*|||:||||\*\*  
Sbjct: 1710 ACTTCCTGCTATTTCTCGCA 1691  
>miR535d Score: 2.0 R03G\_14153  
Query: 1 TGAACGACGATAGAGAGCAC 20  
\*||\*|||:|||||  
Sbjct: 633 TCTAGCTGCTATTTCTCGTG 614  
>miR535d Score: 2.5 R03G\_14251  
Query: 1 TGAACGACGATAGAGAGCAC 20  
|||||\*|||\*||\*||  
Sbjct: 440 ACTTGCTCCTATCTATC-TG 422  
>miR535d Score: 2.5 R03G\_09252  
Query: 1 TGAACGACGATAGAGAGCAC 20  
\*|||||\*||\*||\*  
Sbjct: 462 TCTTGCTGCTATCTATCTTA 443  
>miR535d Score: 2.2 R03G\_06941  
Query: 1 TGAACGACGATAGAGAGCAC 20  
::|||||:||||\*\*|  
Sbjct: 819 GTTTGCTGCTATTTCTCCAG 800  
>miR535d Score: 2.5 R03G\_04512  
Query: 1 TGAACGACGATAGAGAGCAC 20  
\*|||||\*||\*||\*  
Sbjct: 462 TCTTGCTGCTATCTATC-TC 444  
>miR535d Score: 0.0 R03G\_02254  
Query: 1 TGAACGACGATAGAGAGCAC 20  
|||||  
Sbjct: 621 ACTTGCTGCTATCTCTCGTG 602

>miR535d Score: 2.5 R03G\_03471  
Query: 1 TGAACGACGATAGAGAGCAC 20  
\*|||||||:\*|||||||:|||  
Sbjct: 635 TCTTGCTGTCATCTCTTGTG 616

>miR535d Score: 2.5 R03G\_03535  
Query: 1 TGAACGACGATAGAGAGCAC 20  
|||||||\*|||\*  
Sbjct: 39 ACTTGCTGCTATCTCAAGTA 20

>miR535d Score: 2.5 R03G\_03945  
Query: 1 TGAACGACGATAGAGAGCAC 20  
|:||||||\*|||||:||||\*  
Sbjct: 1071 ATTTGCTGGTATCTTTCGTA 1052

>miR1513a-5p Score: 1.2 R03G\_17260  
Query: 1 TGAACAAAGCCATGGACTTGC 21  
::|||||||:|||||||  
Sbjct: 1555 GTTTGTTCGGTATCTGAACG 1535

>miR1513a-5p Score: 1.8 R03G\_17268  
Query: 1 TGAACAAAGCCATGGACTTGC 21  
::|||||||\*|||||||  
Sbjct: 271 GTTTGTTCGGTAGCTGAACG 251

>miR1513a-5p Score: 1.2 R03G\_17226  
Query: 1 TGAACAAAGCCATGGACTTGC 21  
:|||||||\*|||||||  
Sbjct: 1690 GCTTGTTCGGTAACTGAACG 1670

>miR1513a-5p Score: 0.0 R03G\_16812  
Query: 1 TGAACAAAGCCATGGACTTGC 21  
|||||||\*|||||||  
Sbjct: 1687 ACTTGTTCGGTACCTGAACG 1667

>miR1513a-5p Score: 1.2 R03G\_16815  
Query: 1 TGAACAAAGCCATGGACTTGC 21  
:|||||||\*|||||||  
Sbjct: 1690 GCTTGTTCGGTAACTGAACG 1670

>miR1513a-5p Score: 0.0 R03G\_16392  
Query: 1 TGAACAAAGCCATGGACTTGC 21  
|||||||\*|||||||  
Sbjct: 670 ACTTGTTCGGTACCTGAACG 650

>miR1513a-5p Score: 0.0 R03G\_15270  
Query: 1 TGAACAAAGCCATGGACTTGC 21  
|||||||\*|||||||  
Sbjct: 736 ACTTGTTCGGTACCTGAACG 716

>miR1513a-5p Score: 0.0 R03G\_14791  
Query: 1 TGAACAAAGCCATGGACTTGC 21  
|||||||\*|||||||  
Sbjct: 1687 ACTTGTTCGGTACCTGAACG 1667

>miR1513a-5p Score: 1.8 R03G\_14793

Query: 1 TGAACAAAGCCATGGACTTGC 21  
::|||||||\*|||||||  
Sbjct: 1690 GTTTGTTTCGGTAGCTGAACG 1670  
>miR1513a-5p Score: 1.2 R03G\_14795  
Query: 1 TGAACAAAGCCATGGACTTGC 21  
:|||||||\*|||||||  
Sbjct: 1690 GCTTGTTTCGGTAACTGAACG 1670  
>miR1513a-5p Score: 0.0 R03G\_14798  
Query: 1 TGAACAAAGCCATGGACTTGC 21  
|||||||  
Sbjct: 1687 ACTTGTTTCGGTACCTGAACG 1667  
>miR1513a-5p Score: 1.8 R03G\_14800  
Query: 1 TGAACAAAGCCATGGACTTGC 21  
::|||||||\*|||||||  
Sbjct: 1690 GTTTGTTTCGGTAGCTGAACG 1670  
>miR1513a-5p Score: 1.2 R03G\_13288  
Query: 1 TGAACAAAGCCATGGACTTGC 21  
:|||||||:|||||||  
Sbjct: 1690 GTTTGTTTCGGTATCTGAACG 1670  
>miR1513a-5p Score: 0.0 R03G\_09180  
Query: 1 TGAACAAAGCCATGGACTTGC 21  
|||||||  
Sbjct: 1687 ACTTGTTTCGGTACCTGAACG 1667  
>miR1513a-5p Score: 0.0 R03G\_09189  
Query: 1 TGAACAAAGCCATGGACTTGC 21  
|||||||  
Sbjct: 1687 ACTTGTTTCGGTACCTGAACG 1667  
>miR1513a-5p Score: 1.2 R03G\_06734  
Query: 1 TGAACAAAGCCATGGACTTGC 21  
::|||||||:|||||||  
Sbjct: 991 GTTTGTTTCGGTATCTGAACG 971  
>miR1167 Score: 2.5 R03G\_15066  
Query: 1 TGGGCTGTGGATGACTTGAAAC 22  
||:||||||\*||||||\*||  
Sbjct: 565 ACTTGACACCTCCTGAACTATG 544  
>miR6114-5p Score: 0.0 R03G\_13432  
Query: 1 TCGAAAGCACCATGAACGTGA 21  
|||||||  
Sbjct: 368 AGCTTTCGTGGTACTTGCACT 348  
>miR6114-5p Score: 0.0 R03G\_00301  
Query: 1 TCGAAAGCACCATGAACGTGA 21  
|||||||  
Sbjct: 974 AGCTTTCGTGGTACTTGCACT 954  
>miR5809 Score: 0.0 R03G\_16804  
Query: 1 TCGGCTGGCGACCAAAGC 18

|||||  
Sbjct: 1404 AGCCGACCGCTGGTTTCG 1387  
>miR5809 Score: 0.0 R03G\_16602  
Query: 1 TCGGCTGGCGACCAAAGC 18  
|||||  
Sbjct: 210 AGCCGACCGCTGGTTTCG 193  
>miR5809 Score: 0.0 R03G\_16610  
Query: 1 TCGGCTGGCGACCAAAGC 18  
|||||  
Sbjct: 210 AGCCGACCGCTGGTTTCG 193  
>miR5809 Score: 0.0 R03G\_15003  
Query: 1 TCGGCTGGCGACCAAAGC 18  
|||||  
Sbjct: 303 AGCCGACCGCTGGTTTCG 286  
>miR5809 Score: 0.0 R03G\_15108  
Query: 1 TCGGCTGGCGACCAAAGC 18  
|||||  
Sbjct: 813 AGCCGACCGCTGGTTTCG 796  
>miR5809 Score: 0.0 R03G\_15131  
Query: 1 TCGGCTGGCGACCAAAGC 18  
|||||  
Sbjct: 1401 AGCCGACCGCTGGTTTCG 1384  
>miR5809 Score: 0.0 R03G\_13439  
Query: 1 TCGGCTGGCGACCAAAGC 18  
|||||  
Sbjct: 1401 AGCCGACCGCTGGTTTCG 1384  
>miR5809 Score: 0.0 R03G\_13293  
Query: 1 TCGGCTGGCGACCAAAGC 18  
|||||  
Sbjct: 1404 AGCCGACCGCTGGTTTCG 1387  
>miR5809 Score: 0.0 R03G\_12007  
Query: 1 TCGGCTGGCGACCAAAGC 18  
|||||  
Sbjct: 1404 AGCCGACCGCTGGTTTCG 1387  
>miR5809 Score: 2.5 R03G\_12638  
Query: 1 TCGGCTGGCGACCAAAGC 18  
|||\*||:|||||:\*\nSbjct: 1590 AGCCTACTGCTGGTTTTT 1573  
>miR5809 Score: 0.0 R03G\_10715  
Query: 1 TCGGCTGGCGACCAAAGC 18  
|||||  
Sbjct: 1404 AGCCGACCGCTGGTTTCG 1387  
>miR5809 Score: 0.0 R03G\_09718  
Query: 1 TCGGCTGGCGACCAAAGC 18  
|||||

Sbjct: 1404 AGCCGACCGCTGGTTTCG 1387  
>miR5809 Score: 0.0 R03G\_10177  
Query: 1 TCGGCTGGCGACCAAAGC 18  
|||||

Sbjct: 1404 AGCCGACCGCTGGTTTCG 1387  
>miR5809 Score: 0.0 R03G\_09043  
Query: 1 TCGGCTGGCGACCAAAGC 18  
|||||

Sbjct: 675 AGCCGACCGCTGGTTTCG 658  
>miR5809 Score: 0.0 R03G\_04309  
Query: 1 TCGGCTGGCGACCAAAGC 18  
|||||

Sbjct: 1344 AGCCGACCGCTGGTTTCG 1327  
>miR5809 Score: 0.0 R03G\_03867  
Query: 1 TCGGCTGGCGACCAAAGC 18  
|||||

Sbjct: 1401 AGCCGACCGCTGGTTTCG 1384  
>miR5809 Score: 2.2 R03G\_00519  
Query: 1 TCGGCTGGCGACCAAAGC 18  
:|:|\*|:|:|:|:|:|

Sbjct: 179 GGTCGTCCGTTGGTTTCG 162  
>miR5809 Score: 0.0 R03G\_00977  
Query: 1 TCGGCTGGCGACCAAAGC 18  
|||||

Sbjct: 663 AGCCGACCGCTGGTTTCG 646  
>miR5809 Score: 0.0 R03G\_01004  
Query: 1 TCGGCTGGCGACCAAAGC 18  
|||||

Sbjct: 1401 AGCCGACCGCTGGTTTCG 1384  
>miR5809 Score: 2.0 R03G\_01282  
Query: 1 TCGGCTGGCGACCAAAGC 18  
|\*|\*|\*|\*|\*|\*|\*|\*|\*|

Sbjct: 729 ATCCGACAGCTGGTTTCG 712  
>miR5809 Score: 2.2 R03G\_01428  
Query: 1 TCGGCTGGCGACCAAAGC 18  
:|:|\*|\*|\*|\*|\*|\*|\*|

Sbjct: 19 GGCCGACAGCTGGTTT-G 3  
>miR5809 Score: 0.0 R03G\_01475  
Query: 1 TCGGCTGGCGACCAAAGC 18  
|||||

Sbjct: 1401 AGCCGACCGCTGGTTTCG 1384  
>miR8578.2 Score: 2.5 R03G\_16055  
Query: 1 TATGAGTGTATTAGCAATG 19  
\*|\*|\*|\*|\*|\*|\*|\*|\*|

Sbjct: 1542 TTACTIONGACTAGTCGTT-C 1525

>miR8578.2 Score: 2.2 R03G\_15696  
Query: 1 TATGAGTGTATTAGCAATG 19  
:|||||||\*|||||||\*||  
Sbjct: 1095 G TACTCACCTAATCGT-AC 1078

>miR8578.2 Score: 2.5 R03G\_15525  
Query: 1 TATGAGTGTATTAGCAATG 19  
||\*|||||||\*::  
Sbjct: 1344 ATTCTCACATAATCGTAGT 1326

>miR8578.2 Score: 0.0 R03G\_14870  
Query: 1 TATGAGTGTATTAGCAATG 19  
|||||||  
Sbjct: 1896 ATACTCACATAATCGTTAC 1878

>miR8578.2 Score: 0.0 R03G\_14186  
Query: 1 TATGAGTGTATTAGCAATG 19  
|||||||  
Sbjct: 1896 ATACTCACATAATCGTTAC 1878

>miR8578.2 Score: 0.0 R03G\_14190  
Query: 1 TATGAGTGTATTAGCAATG 19  
|||||||  
Sbjct: 1896 ATACTCACATAATCGTTAC 1878

>miR8578.2 Score: 0.0 R03G\_13228  
Query: 1 TATGAGTGTATTAGCAATG 19  
|||||||  
Sbjct: 1485 ATACTCACATAATCGTTAC 1467

>miR8578.2 Score: 2.2 R03G\_08552  
Query: 1 TATGAGTGTATTAGCAATG 19  
:|||\*:|||||\*  
Sbjct: 720 GTACCTACATAATCGTTAG 702

>miR8578.2 Score: 0.0 R03G\_08806  
Query: 1 TATGAGTGTATTAGCAATG 19  
|||||||  
Sbjct: 1896 ATACTCACATAATCGTTAC 1878

>miR8578.2 Score: 2.5 R03G\_07900  
Query: 1 TATGAGTGTATTAGCAATG 19  
|\*|:|:|||||:||||  
Sbjct: 261 ACATTTACATAATTGTTAC 243

>miR8578.2 Score: 2.0 R03G\_04839  
Query: 1 TATGAGTGTATTAGCAATG 19  
|||||||\*|:|\*|  
Sbjct: 312 ATACTCACATATTTGTT-C 295

>miR8578.2 Score: 0.0 R03G\_01029  
Query: 1 TATGAGTGTATTAGCAATG 19  
|||||||  
Sbjct: 855 ATACTCACATAATCGTTAC 837

>miR7729a-5p Score: 0.5 R03G\_16371

Query: 1 TGT TTTCAAGTAGGACAGTGAGC 23  
|||||||:|:|  
Sbjct: 184 ACAAAAGTTCATCCTGTCATTTG 162  
>miR7729a-5p Score: 0.5 R03G\_15905  
Query: 1 TGT TTTCAAGTAGGACAGTGAGC 23  
|||||||:|||||||  
Sbjct: 184 ACAAAAGTTCGTCCTGTCCTCG 162  
>miR7729a-5p Score: 2.5 R03G\_15142  
Query: 1 TGT TTTCAAGTAGGACAGTGAGC 23  
|||||\*|||||||\*\*|\*|  
Sbjct: 190 ACAAACTTCATCCTGTCTGTGG 168  
>miR7729a-5p Score: 0.0 R03G\_12528  
Query: 1 TGT TTTCAAGTAGGACAGTGAGC 23  
|||||||  
Sbjct: 184 ACAAAAGTTCATCCTGTCCTCG 162  
>miR7729a-5p Score: 0.0 R03G\_06738  
Query: 1 TGT TTTCAAGTAGGACAGTGAGC 23  
|||||||  
Sbjct: 421 ACAAAAGTTCATCCTGTCCTCG 399  
>miR7729a-5p Score: 0.0 R03G\_02826  
Query: 1 TGT TTTCAAGTAGGACAGTGAGC 23  
|||||||  
Sbjct: 184 ACAAAAGTTCATCCTGTCCTCG 162  
>miR7729a-5p Score: 0.0 R03G\_17349  
Query: 1 TGT TTTCAAGTAGGACAGTGAGC 23  
|||||||  
Sbjct: 418 ACAAAAGTTCATCCTGTCCTCG 396  
>miR7753-3p Score: 2.5 R03G\_15882  
Query: 1 TTGAGCAATGGAGAAGAAGG 20  
:|:|\*|||:|||||:  
Sbjct: 874 GATTCTTACTTCTTCTTCT 855  
>miR7753-3p Score: 2.5 R03G\_15183  
Query: 1 TTGAGCAATGGAGAAGAAGG 20  
\*|||||\*|||:||||\*|  
Sbjct: 2019 TACTCGTTTCCTTTTCTTGC 2000  
>miR7753-3p Score: 2.5 R03G\_08425  
Query: 1 TTGAGCAATGGAGAAGAAGG 20  
:|||:||||:||||:|\*|  
Sbjct: 594 GACTTGTTATCTTTTATC 575  
>miR7753-3p Score: 2.2 R03G\_09011  
Query: 1 TTGAGCAATGGAGAAGAAGG 20  
|||||||\*|||||:|\*|:  
Sbjct: 3581 AACTCGTTTCCTTTT-CT 3563  
>miR7753-3p Score: 2.2 R03G\_07292  
Query: 1 TTGAGCAATGGAGAAGAAGG 20







>miR2108b Score: 0.5 R03G\_17257  
Query: 1 TTAATGTATGTGTTTGTAGT 20  
|:|||||||||||||||||  
Sbjct: 2039 AGTTACATACACAAACATCA 2020

>miR2108b Score: 1.8 R03G\_16749  
Query: 1 TTAATGTATGTGTTTGTAGT 20  
|:|||||||||:|||||\*:  
Sbjct: 2123 AGTTACATACATAAACAATA 2104

>miR2108b Score: 1.8 R03G\_16136  
Query: 1 TTAATGTATGTGTTTGTAGT 20  
|:|||||||||:|||||\*:  
Sbjct: 2039 AGTTACATACATAAACAATA 2020

>miR2108b Score: 0.5 R03G\_15889  
Query: 1 TTAATGTATGTGTTTGTAGT 20  
|:|||||||||||||||||  
Sbjct: 2039 AGTTACATACACAAACATCA 2020

>miR2108b Score: 2.5 R03G\_14674  
Query: 1 TTAATGTATGTGTTTGTAGT 20  
|\*||||||||||||\*||\*|  
Sbjct: 517 ACTTACATACACAACCAT-A 499

>miR2108b Score: 2.2 R03G\_13523  
Query: 1 TTAATGTATGTGTTTGTAGT 20  
|:|||||:\*|||||||:  
Sbjct: 410 AGTTACATGAACAAACATCG 391

>miR2108b Score: 1.8 R03G\_13145  
Query: 1 TTAATGTATGTGTTTGTAGT 20  
|:|||||||||:|||||\*:  
Sbjct: 2123 AGTTACATACATAAACAATA 2104

>miR2108b Score: 1.8 R03G\_13273  
Query: 1 TTAATGTATGTGTTTGTAGT 20  
|:|||||||||:|||||\*:  
Sbjct: 2123 AGTTACATACATAAACAATA 2104

>miR2108b Score: 0.5 R03G\_10735  
Query: 1 TTAATGTATGTGTTTGTAGT 20  
|:|||||||||||||||||  
Sbjct: 1568 AGTTACATACACAAACATCA 1549

>miR2108b Score: 1.8 R03G\_09728  
Query: 1 TTAATGTATGTGTTTGTAGT 20  
||\*|||||:|||||||:  
Sbjct: 174 AAATACATATACAAACATTA 155

>miR2108b Score: 0.5 R03G\_10040  
Query: 1 TTAATGTATGTGTTTGTAGT 20  
|:|||||||||||||||||  
Sbjct: 713 AGTTACATACACAAACATCA 694

>miR2108b Score: 1.8 R03G\_10217

Query: 1 TTAATGTATGTGTTTGTAGT 20  
|:|||||||:||||\*|  
Sbjct: 2123 AGTTACATACATAAACAATA 2104  
>miR2108b Score: 0.5 R03G\_09183  
Query: 1 TTAATGTATGTGTTTGTAGT 20  
|:|||||||  
Sbjct: 1256 AGTTACATACACAAACATCA 1237  
>miR2108b Score: 2.2 R03G\_07555  
Query: 1 TTAATGTATGTGTTTGTAGT 20  
\*:|||||||:|\*:  
Sbjct: 446 CGTTACATACACAAACGT-G 428  
>miR2108b Score: 1.8 R03G\_07697  
Query: 1 TTAATGTATGTGTTTGTAGT 20  
|:|||||||:||||\*|  
Sbjct: 449 AGTTACATACATAAACAATA 430  
>miR2108b Score: 2.5 R03G\_04258  
Query: 1 TTAATGTATGTGTTTGTAGT 20  
||||:|:|\*|||\*||  
Sbjct: 1408 AATTATATATAAAAACA-CA 1390  
>miR2108b Score: 0.0 R03G\_04592  
Query: 1 TTAATGTATGTGTTTGTAGT 20  
|||||||  
Sbjct: 1295 AATTACATACACAAACATCA 1276  
>miR2108b Score: 1.8 R03G\_04681  
Query: 1 TTAATGTATGTGTTTGTAGT 20  
|:|||||||:||||\*|  
Sbjct: 713 AGTTACATACATAAACAATA 694  
>miR2108b Score: 0.5 R03G\_05424  
Query: 1 TTAATGTATGTGTTTGTAGT 20  
|:|||||||  
Sbjct: 2039 AGTTACATACACAAACATCA 2020  
>miR2108b Score: 0.5 R03G\_03585  
Query: 1 TTAATGTATGTGTTTGTAGT 20  
|:|||||||  
Sbjct: 713 AGTTACATACACAAACATCA 694  
>miR2108b Score: 0.5 R03G\_00289  
Query: 1 TTAATGTATGTGTTTGTAGT 20  
|:|||||||  
Sbjct: 851 AGTTACATACACAAACATCA 832  
>miR2108b Score: 0.5 R03G\_17351  
Query: 1 TTAATGTATGTGTTTGTAGT 20  
|:|||||||  
Sbjct: 851 AGTTACATACACAAACATCA 832  
>miR2867-3p Score: 2.5 R03G\_17204  
Query: 1 TCAGGACTTTGGGATGGCCA 20

|||||:\*\*|  
Sbjct: 695 AGTCCTGAAACTCGTCCGGT 676  
>miR2867-3p Score: 1.5 R03G\_17211  
Query: 1 TCAGGACTTTGGGATGGCCA 20  
|||||:\*\*|  
Sbjct: 815 AGTCCTGAAACTCGACCGGT 796  
>miR2867-3p Score: 1.5 R03G\_17213  
Query: 1 TCAGGACTTTGGGATGGCCA 20  
|||||:\*\*|  
Sbjct: 140 AGTCCTGAAACTCGACCGGT 121  
>miR2867-3p Score: 2.0 R03G\_17223  
Query: 1 TCAGGACTTTGGGATGGCCA 20  
||\*|||||\*|||||  
Sbjct: 539 AGACCTGAAACACTACCGGT 520  
>miR2867-3p Score: 0.0 R03G\_17069  
Query: 1 TCAGGACTTTGGGATGGCCA 20  
|||||  
Sbjct: 680 AGTCCTGAAACCCTACCGGT 661  
>miR2867-3p Score: 2.5 R03G\_16905  
Query: 1 TCAGGACTTTGGGATGGCCA 20  
||\*|||||:\*\*|  
Sbjct: 632 AGCCCTGAAACTCGACCGGT 613  
>miR2867-3p Score: 2.0 R03G\_16715  
Query: 1 TCAGGACTTTGGGATGGCCA 20  
||\*|||||\*|||||  
Sbjct: 275 AGCCCTGAAACCCGACCGGT 256  
>miR2867-3p Score: 2.0 R03G\_16725  
Query: 1 TCAGGACTTTGGGATGGCCA 20  
||\*|||||\*|||||  
Sbjct: 557 AGACCTGAAACACTACCGGT 538  
>miR2867-3p Score: 2.0 R03G\_16742  
Query: 1 TCAGGACTTTGGGATGGCCA 20  
||\*|||||\*|||||  
Sbjct: 815 AGACCTGAAACACTACCGGT 796  
>miR2867-3p Score: 2.0 R03G\_16706  
Query: 1 TCAGGACTTTGGGATGGCCA 20  
||\*|||||\*|||||  
Sbjct: 539 AGACCTGAAACACTACCGGT 520  
>miR2867-3p Score: 2.0 R03G\_16372  
Query: 1 TCAGGACTTTGGGATGGCCA 20  
||\*|||||\*|||||  
Sbjct: 815 AGACCTGAAACACTACCGGT 796  
>miR2867-3p Score: 2.0 R03G\_16377  
Query: 1 TCAGGACTTTGGGATGGCCA 20  
|||:|||||:\*\*|

Sbjct: 140 AGTCTTGAAACTCGACCGGT 121  
>miR2867-3p Score: 2.0 R03G\_16420  
Query: 1 TCAGGACTTTGGGATGGCCA 20  
||\*|||||||\*|||||||

Sbjct: 566 AGACCTGAAACGCTACCGGT 547  
>miR2867-3p Score: 2.2 R03G\_16533  
Query: 1 TCAGGACTTTGGGATGGCCA 20  
:|:|:|:|:|:|:|\*|

Sbjct: 1411 GGTTCTGGAACCCTACCACT 1392  
>miR2867-3p Score: 2.0 R03G\_16548  
Query: 1 TCAGGACTTTGGGATGGCCA 20  
|:|:|:|:|:|:|\*|\*|

Sbjct: 470 AGTCCTGAAACTCGACCGTT 451  
>miR2867-3p Score: 1.5 R03G\_16118  
Query: 1 TCAGGACTTTGGGATGGCCA 20  
|:|:|:|:|:|:|\*|\*|

Sbjct: 83 AGTCCTGAAACTCGACCGGT 64  
>miR2867-3p Score: 2.0 R03G\_16123  
Query: 1 TCAGGACTTTGGGATGGCCA 20  
||\*|||||||\*|||||||

Sbjct: 815 AGACCTGAAACACTACCGGT 796  
>miR2867-3p Score: 2.5 R03G\_15672  
Query: 1 TCAGGACTTTGGGATGGCCA 20  
|:|:|:|:|:|:|\*|\*|

Sbjct: 632 AGTCCTGAAACTCGTCCGGT 613  
>miR2867-3p Score: 1.5 R03G\_15873  
Query: 1 TCAGGACTTTGGGATGGCCA 20  
|:|:|:|:|:|:|\*|\*|

Sbjct: 815 AGTCCTGAAACTCGACCGGT 796  
>miR2867-3p Score: 2.0 R03G\_15271  
Query: 1 TCAGGACTTTGGGATGGCCA 20  
||\*|||||||\*|||||||

Sbjct: 815 AGACCTGAAACACTACCGGT 796  
>miR2867-3p Score: 2.0 R03G\_15282  
Query: 1 TCAGGACTTTGGGATGGCCA 20  
||\*|||||||\*|||||||

Sbjct: 539 AGACCTGAAACGCTACCGGT 520  
>miR2867-3p Score: 2.5 R03G\_14987  
Query: 1 TCAGGACTTTGGGATGGCCA 20  
|:|:~|:|:|:|:|:|\*|\*|

Sbjct: 479 AGTCCTGAAACTCGTCCGGT 460  
>miR2867-3p Score: 1.5 R03G\_15154  
Query: 1 TCAGGACTTTGGGATGGCCA 20  
|:|:|:|:|:|:|\*|\*|

Sbjct: 815 AGTCCTGAAACTCGACCGGT 796

>miR2867-3p Score: 0.0 R03G\_14361  
Query: 1 TCAGGACTTTGGGATGGCCA 20  
|||||  
Sbjct: 815 AGTCCTGAAACCCTACCGGT 796

>miR2867-3p Score: 0.0 R03G\_14568  
Query: 1 TCAGGACTTTGGGATGGCCA 20  
|||||  
Sbjct: 815 AGTCCTGAAACCCTACCGGT 796

>miR2867-3p Score: 2.5 R03G\_14620  
Query: 1 TCAGGACTTTGGGATGGCCA 20  
|||||  
Sbjct: 260 AGTCCTGAAACTCGTCCGGT 241

>miR2867-3p Score: 2.5 R03G\_14772  
Query: 1 TCAGGACTTTGGGATGGCCA 20  
|||||  
Sbjct: 710 AGTCCTGAAACTCGTCCGGT 691

>miR2867-3p Score: 2.5 R03G\_14050  
Query: 1 TCAGGACTTTGGGATGGC-CA 20  
|||||:|||||\*\*\*||  
Sbjct: 1504 AGTCCTGGAACCCTACAACGT 1484

>miR2867-3p Score: 1.5 R03G\_13447  
Query: 1 TCAGGACTTTGGGATGGCCA 20  
|||||:|\*|||||  
Sbjct: 815 AGTCCTGAAACTCGACCGGT 796

>miR2867-3p Score: 1.5 R03G\_13706  
Query: 1 TCAGGACTTTGGGATGGCCA 20  
|||||:|\*|||||  
Sbjct: 773 AGTCCTGAAACTCGACCGGT 754

>miR2867-3p Score: 2.0 R03G\_13714  
Query: 1 TCAGGACTTTGGGATGGCCA 20  
||\*|||||||\*|||||||  
Sbjct: 815 AGACCTGAAACTACTACCGGT 796

>miR2867-3p Score: 2.5 R03G\_13852  
Query: 1 TCAGGACTTTGGGATGGCCA 20  
||\*|||||||\*||||:|||  
Sbjct: 566 AGACCTGAAACTACTGTT 547

>miR2867-3p Score: 2.0 R03G\_12663  
Query: 1 TCAGGACTTTGGGATGGCCA 20  
||\*|||||||\*|||||||  
Sbjct: 650 AGACCTGAAACTACTACCGGT 631

>miR2867-3p Score: 2.5 R03G\_12670  
Query: 1 TCAGGACTTTGGGATGGCCA 20  
|||||:|\*|||||  
Sbjct: 632 AGTCCTGAAACTCGTCCGGT 613

>miR2867-3p Score: 1.5 R03G\_13276

Query: 1 TCAGGACTTTGGGATGGCCA 20  
|||||||:|\*|  
Sbjct: 197 AGTCCTGAAACTCGACCGGT 178  
>miR2867-3p Score: 0.0 R03G\_11966  
Query: 1 TCAGGACTTTGGGATGGCCA 20  
|||||||:|\*|  
Sbjct: 815 AGTCCTGAAACCCTACCGGT 796  
>miR2867-3p Score: 1.5 R03G\_12013  
Query: 1 TCAGGACTTTGGGATGGCCA 20  
|||||||:|\*|  
Sbjct: 140 AGTCCTGAAACTCGACCGGT 121  
>miR2867-3p Score: 2.5 R03G\_12082  
Query: 1 TCAGGACTTTGGGATGGCCA 20  
|||||||:|\*\*|  
Sbjct: 710 AGTCCTGAAACTCGTCCGGT 691  
>miR2867-3p Score: 1.5 R03G\_12174  
Query: 1 TCAGGACTTTGGGATGGCCA 20  
|||||||:|\*|  
Sbjct: 140 AGTCCTGAAACTCGACCGGT 121  
>miR2867-3p Score: 2.5 R03G\_12186  
Query: 1 TCAGGACTTTGGGATGGCCA 20  
||\*||||||:|\*|  
Sbjct: 824 AGACCTGAAACTCGACCGGT 805  
>miR2867-3p Score: 2.5 R03G\_12196  
Query: 1 TCAGGACTTTGGGATGGCCA 20  
||\*||||||:|\*|  
Sbjct: 746 AGACCTGAAACTCGACCGGT 727  
>miR2867-3p Score: 2.5 R03G\_12525  
Query: 1 TCAGGACTTTGGGATGGCCA 20  
||\*||||||:|\*|  
Sbjct: 746 AGCCCTGAAACTCGACCGGT 727  
>miR2867-3p Score: 1.5 R03G\_12526  
Query: 1 TCAGGACTTTGGGATGGCCA 20  
|||||||:|\*|  
Sbjct: 815 AGTCCTGAAACTCGACCGGT 796  
>miR2867-3p Score: 1.5 R03G\_11244  
Query: 1 TCAGGACTTTGGGATGGCCA 20  
|||||||:|\*|  
Sbjct: 815 AGTCCTGAAACTCGACCGGT 796  
>miR2867-3p Score: 1.5 R03G\_11263  
Query: 1 TCAGGACTTTGGGATGGCCA 20  
|||||||:|\*|  
Sbjct: 140 AGTCCTGAAACTCGACCGGT 121  
>miR2867-3p Score: 2.5 R03G\_11273  
Query: 1 TCAGGACTTTGGGATGGCCA 20

||\*|||||||:|\*|||||  
Sbjct: 155 AGCCCTGAAACTCGACCGGT 136  
>miR2867-3p Score: 2.5 R03G\_11405  
Query: 1 TCAGGACTTTGGGATGGCCA 20  
|||||||:|\*\*|||||  
Sbjct: 632 AGTCCTGAAACTCGTCCGGT 613  
>miR2867-3p Score: 1.5 R03G\_11528  
Query: 1 TCAGGACTTTGGGATGGCCA 20  
|||||||:|\*|||||  
Sbjct: 140 AGTCCTGAAACTCGACCGGT 121  
>miR2867-3p Score: 2.5 R03G\_11534  
Query: 1 TCAGGACTTTGGGATGGCCA 20  
||||\*||||:|\*|||||  
Sbjct: 815 AGTCCCGAAACTCGACCGGT 796  
>miR2867-3p Score: 2.0 R03G\_11781  
Query: 1 TCAGGACTTTGGGATGGCCA 20  
||\*|||||||\*|||||||  
Sbjct: 710 AGACCTGAAACACTACCGGT 691  
>miR2867-3p Score: 1.5 R03G\_11948  
Query: 1 TCAGGACTTTGGGATGGCCA 20  
|||||||:|\*|||||  
Sbjct: 815 AGTCCTGAAACTCGACCGGT 796  
>miR2867-3p Score: 1.5 R03G\_10528  
Query: 1 TCAGGACTTTGGGATGGCCA 20  
|||||||:|\*|||||  
Sbjct: 140 AGTCCTGAAACTCGACCGGT 121  
>miR2867-3p Score: 1.5 R03G\_10537  
Query: 1 TCAGGACTTTGGGATGGCCA 20  
|||||||:|\*|||||  
Sbjct: 638 AGTCCTGAAACTCGACCGGT 619  
>miR2867-3p Score: 1.5 R03G\_10720  
Query: 1 TCAGGACTTTGGGATGGCCA 20  
|||||||:|\*|||||  
Sbjct: 815 AGTCCTGAAACTCGACCGGT 796  
>miR2867-3p Score: 0.5 R03G\_10729  
Query: 1 TCAGGACTTTGGGATGGCCA 20  
|||||||:|||||  
Sbjct: 815 AGTCCTGAAACCCTATCGGT 796  
>miR2867-3p Score: 1.5 R03G\_10742  
Query: 1 TCAGGACTTTGGGATGGCCA 20  
|||||||:|\*|||||  
Sbjct: 140 AGTCCTGAAACTCGACCGGT 121  
>miR2867-3p Score: 1.0 R03G\_10773  
Query: 1 TCAGGACTTTGGGATGGCCA 20  
||||\*|||||||



Sbjct: 815 AGTCCCGAAACCCTACCGGT 796  
>miR2867-3p Score: 1.0 R03G\_10780  
Query: 1 TCAGGACTTTGGGATGGCCA 20  
||||\*|||||||||||||

Sbjct: 815 AGTCCCGAAACCCTACCGGT 796  
>miR2867-3p Score: 2.0 R03G\_09193  
Query: 1 TCAGGACTTTGGGATGGCCA 20  
||\*||||||||\*|||||||

Sbjct: 539 AGACCTGAAACACTACCGGT 520  
>miR2867-3p Score: 1.0 R03G\_09194  
Query: 1 TCAGGACTTTGGGATGGCCA 20  
||||||||||||||||\*|||

Sbjct: 815 AGTCCTGAAACCCTACAGGT 796  
>miR2867-3p Score: 1.5 R03G\_09199  
Query: 1 TCAGGACTTTGGGATGGCCA 20  
|||||||||||:|\*|||||

Sbjct: 815 AGTCCTGAAACTCGACCGGT 796  
>miR2867-3p Score: 1.2 R03G\_09542  
Query: 1 TCAGGACTTTGGGATGGCCA 20  
:||||\*|||||||||||||

Sbjct: 815 GGTCCCGAAACCCTACCGGT 796  
>miR2867-3p Score: 1.5 R03G\_09924  
Query: 1 TCAGGACTTTGGGATGGCCA 20  
|||||||||||:|\*|||||

Sbjct: 815 AGTCCTGAAACTCGACCGGT 796  
>miR2867-3p Score: 2.5 R03G\_09944  
Query: 1 TCAGGACTTTGGGATGGCCA 20  
|||||||||||:|\*\*|||||

Sbjct: 632 AGTCCTGAAACTCGTCCGGT 613  
>miR2867-3p Score: 1.0 R03G\_09945  
Query: 1 TCAGGACTTTGGGATGGCCA 20  
||||||||||||||||\*|||

Sbjct: 539 AGTCCTGAAACCCTACAGGT 520  
>miR2867-3p Score: 2.5 R03G\_09955  
Query: 1 TCAGGACTTTGGGATGGCCA 20  
||\*||||||||:|\*|||||

Sbjct: 509 AGCCCTGAAACTCGACCGGT 490  
>miR2867-3p Score: 0.0 R03G\_09967  
Query: 1 TCAGGACTTTGGGATGGCCA 20  
|||||||||||||||||

Sbjct: 815 AGTCCTGAAACCCTACCGGT 796  
>miR2867-3p Score: 1.5 R03G\_10044  
Query: 1 TCAGGACTTTGGGATGGCCA 20  
|||||||||||:|\*|||||

Sbjct: 815 AGTCCTGAAACTCGACCGGT 796



Query: 1 TCAGGACTTTGGGATGGCCA 20  
|||||||:\*\*|  
Sbjct: 632 AGTCCTGAAACTCGTCCGGT 613  
>miR2867-3p Score: 2.5 R03G\_07673  
Query: 1 TCAGGACTTTGGGATGGCCA 20  
||\*|||||\*||:|  
Sbjct: 815 AGCCCTGAAACACTGCCGGT 796  
>miR2867-3p Score: 1.5 R03G\_07683  
Query: 1 TCAGGACTTTGGGATGGCCA 20  
|||||||:|\*|  
Sbjct: 815 AGTCCTGAAACTCGACCGGT 796  
>miR2867-3p Score: 2.5 R03G\_07689  
Query: 1 TCAGGACTTTGGGATGGCCA 20  
|||||||:\*\*|  
Sbjct: 632 AGTCCTGAAACTCGTCCGGT 613  
>miR2867-3p Score: 2.0 R03G\_07702  
Query: 1 TCAGGACTTTGGGATGGCCA 20  
||\*|||||\*|  
Sbjct: 566 AGACCTGAAACGCTACCGGT 547  
>miR2867-3p Score: 2.0 R03G\_07705  
Query: 1 TCAGGACTTTGGGATGGCCA 20  
||\*|||||\*|  
Sbjct: 815 AGACCTGAAACGCTACCGGT 796  
>miR2867-3p Score: 2.5 R03G\_07739  
Query: 1 TCAGGACTTTGGGATGGCCA 20  
||\*|||||\*|||:|  
Sbjct: 566 AGACCTGAAACACTACTGGT 547  
>miR2867-3p Score: 0.0 R03G\_07860  
Query: 1 TCAGGACTTTGGGATGGCCA 20  
|||||||  
Sbjct: 815 AGTCCTGAAACCCTACCGGT 796  
>miR2867-3p Score: 2.0 R03G\_07867  
Query: 1 TCAGGACTTTGGGATGGCCA 20  
||\*|||||\*|  
Sbjct: 566 AGACCTGAAACACTACCGGT 547  
>miR2867-3p Score: 2.0 R03G\_05640  
Query: 1 TCAGGACTTTGGGATGGCCA 20  
||\*|||||\*|  
Sbjct: 710 AGACCTGAAACACTACCGGT 691  
>miR2867-3p Score: 1.5 R03G\_05916  
Query: 1 TCAGGACTTTGGGATGGCCA 20  
|||||||:|\*|  
Sbjct: 815 AGTCCTGAAACTCGACCGGT 796  
>miR2867-3p Score: 0.0 R03G\_05921  
Query: 1 TCAGGACTTTGGGATGGCCA 20

|||||  
Sbjct: 815 AGTCCTGAAACCCTACCGGT 796  
>miR2867-3p Score: 2.0 R03G\_05950  
Query: 1 TCAGGACTTTGGGATGGCCA 20  
||\*|||||\*|||||  
Sbjct: 293 AGCCCTGAAACCCGACCGGT 274  
>miR2867-3p Score: 0.0 R03G\_05953  
Query: 1 TCAGGACTTTGGGATGGCCA 20  
|||||  
Sbjct: 815 AGTCCTGAAACCCTACCGGT 796  
>miR2867-3p Score: 0.0 R03G\_05959  
Query: 1 TCAGGACTTTGGGATGGCCA 20  
|||||  
Sbjct: 815 AGTCCTGAAACCCTACCGGT 796  
>miR2867-3p Score: 2.0 R03G\_06717  
Query: 1 TCAGGACTTTGGGATGGCCA 20  
||\*|||||\*|||||  
Sbjct: 815 AGACCTGAAACACTACCGGT 796  
>miR2867-3p Score: 2.5 R03G\_06721  
Query: 1 TCAGGACTTTGGGATGGCCA 20  
|||||:|\*\*|||||  
Sbjct: 629 AGTCCTGAAACTCGTCCGGT 610  
>miR2867-3p Score: 2.5 R03G\_04654  
Query: 1 TCAGGACTTTGGGATGGCCA 20  
|||||:|\*\*|||||  
Sbjct: 632 AGTCCTGAAACTCGTCCGGT 613  
>miR2867-3p Score: 2.0 R03G\_04674  
Query: 1 TCAGGACTTTGGGATGGCCA 20  
||\*|||||\*|||||  
Sbjct: 566 AGACCTGAAACACTACCGGT 547  
>miR2867-3p Score: 2.5 R03G\_04695  
Query: 1 TCAGGACTTTGGGATGGCCA 20  
||\*|:|||||\*|||||  
Sbjct: 605 AGACTTGAAACACTACCGGT 586  
>miR2867-3p Score: 2.5 R03G\_04786  
Query: 1 TCAGGACTTTGGGATGGCCA 20  
||\*|||||:|\*|||||  
Sbjct: 392 AGCCCTGAAACTCGACCGGT 373  
>miR2867-3p Score: 0.0 R03G\_05267  
Query: 1 TCAGGACTTTGGGATGGCCA 20  
|||||  
Sbjct: 815 AGTCCTGAAACCCTACCGGT 796  
>miR2867-3p Score: 2.0 R03G\_05268  
Query: 1 TCAGGACTTTGGGATGGCCA 20  
||\*|||||\*|||||

Sbjct: 815 AGACCTGAAACTACCGGT 796  
>miR2867-3p Score: 2.5 R03G\_02700  
Query: 1 TCAGGACTTTGGGATGGCCA 20  
||\*|||||||:|\*|||||||

Sbjct: 509 AGCCCTGAAACTCGACCGGT 490  
>miR2867-3p Score: 2.0 R03G\_02824  
Query: 1 TCAGGACTTTGGGATGGCCA 20  
||\*|||||||\*|||||||

Sbjct: 815 AGACCTGAAACTACCGGT 796  
>miR2867-3p Score: 1.5 R03G\_03558  
Query: 1 TCAGGACTTTGGGATGGCCA 20  
|||||||:|\*|||||||

Sbjct: 815 AGTCCTGAAACTCGACCGGT 796  
>miR2867-3p Score: 2.5 R03G\_03570  
Query: 1 TCAGGACTTTGGGATGGCCA 20  
||\*|||||||:|\*|||||||

Sbjct: 509 AGCCCTGAAACTCGACCGGT 490  
>miR2867-3p Score: 2.0 R03G\_03605  
Query: 1 TCAGGACTTTGGGATGGCCA 20  
||\*|||||||\*|||||||

Sbjct: 1277 AGCCCTGAAACCCGACCGGT 1258  
>miR2867-3p Score: 1.5 R03G\_03617  
Query: 1 TCAGGACTTTGGGATGGCCA 20  
|||||||:|\*|||||||

Sbjct: 815 AGTCCTGAAACTCGACCGGT 796  
>miR2867-3p Score: 2.5 R03G\_03785  
Query: 1 TCAGGACTTTGGGATGGCCA 20  
|||||||:|\*\*|||||||

Sbjct: 437 AGTCCTGAAACTCGTCCGGT 418  
>miR2867-3p Score: 2.5 R03G\_03797  
Query: 1 TCAGGACTTTGGGATGGCCA 20  
|||||||:|\*\*|||||||

Sbjct: 320 AGTCCTGAAACTCGTCCGGT 301  
>miR2867-3p Score: 1.5 R03G\_03987  
Query: 1 TCAGGACTTTGGGATGGCCA 20  
|||||||:|\*|||||||

Sbjct: 815 AGTCCTGAAACTCGACCGGT 796  
>miR2867-3p Score: 2.5 R03G\_04200  
Query: 1 TCAGGACTTTGGGATGGCCA 20  
|||||||:|\*\*|||||||

Sbjct: 632 AGTCCTGAAACTCGTCCGGT 613  
>miR2867-3p Score: 0.5 R03G\_04207  
Query: 1 TCAGGACTTTGGGATGGCCA 20  
||||:|||||||

Sbjct: 815 AGTCTTGAAACCCTACCGGT 796

>miR2867-3p Score: 1.0 R03G\_04210  
Query: 1 TCAGGACTTTGGGATGGCCA 20  
||||\*|||||||  
Sbjct: 815 AGTCCCGAAACCCTACCGGT 796

>miR2867-3p Score: 2.5 R03G\_00247  
Query: 1 TCAGGACTTTGGGATGGCCA 20  
|||||||:|\*\*|||  
Sbjct: 632 AGTCCTGAAACTCGTCCGGT 613

>miR2867-3p Score: 0.0 R03G\_00256  
Query: 1 TCAGGACTTTGGGATGGCCA 20  
|||||||  
Sbjct: 815 AGTCCTGAAACCCTACCGGT 796

>miR2867-3p Score: 2.0 R03G\_00677  
Query: 1 TCAGGACTTTGGGATGGCCA 20  
||\*|||||||\*|||  
Sbjct: 377 AGCCCTGAAACCCGACCGGT 358

>miR2867-3p Score: 2.5 R03G\_00690  
Query: 1 TCAGGACTTTGGGATGGCCA 20  
||\*|||||||:|\*|||  
Sbjct: 764 AGCCCTGAAACTCGACCGGT 745

>miR2867-3p Score: 2.0 R03G\_00745  
Query: 1 TCAGGACTTTGGGATGGCCA 20  
||\*|||||||\*|||  
Sbjct: 536 AGACCTGAAACTACTACCGGT 517

>miR2867-3p Score: 1.5 R03G\_01194  
Query: 1 TCAGGACTTTGGGATGGCCA 20  
|||||||:|\*|||  
Sbjct: 815 AGTCCTGAAACTCGACCGGT 796

>miR2867-3p Score: 1.5 R03G\_01313  
Query: 1 TCAGGACTTTGGGATGGCCA 20  
|||||||:|\*|||  
Sbjct: 815 AGTCCTGAAACTCGACCGGT 796

>miR2867-3p Score: 2.0 R03G\_01328  
Query: 1 TCAGGACTTTGGGATGGCCA 20  
||\*|||||||\*|||  
Sbjct: 815 AGACCTGAAACTACTACCGGT 796

>miR2867-3p Score: 2.5 R03G\_01468  
Query: 1 TCAGGACTTTGGGATGGCCA 20  
\*||:|||||||:|:|\*||  
Sbjct: 469 CGTTCTGAAACCTTGCCCGT 450

>miR2867-3p Score: 2.0 R03G\_01588  
Query: 1 TCAGGACTTTGGGATGGCCA 20  
||\*|||||||\*|||  
Sbjct: 155 AGCCCTGAAACCCGACCGGT 136

>miR2867-3p Score: 1.5 R03G\_01735

Query: 1 TCAGGACTTTGGGATGGCCA 20  
|||||||:|\*|||  
Sbjct: 815 AGTCCTGAAACTCGACCGGT 796  
>miR2867-3p Score: 2.5 R03G\_01925  
Query: 1 TCAGGACTTTGGGATGGCCA 20  
||\*|||:|\*|||  
Sbjct: 824 AGCCCTGAAACTCGACCGGT 805  
>miR2867-3p Score: 1.0 R03G\_01942  
Query: 1 TCAGGACTTTGGGATGGCCA 20  
|||||||\*|||  
Sbjct: 812 AGTCCTGAAACCCTACAGGT 793  
>miR2867-3p Score: 1.5 R03G\_01950  
Query: 1 TCAGGACTTTGGGATGGCCA 20  
|||||||:|\*|||  
Sbjct: 815 AGTCCTGAAACTCGACCGGT 796  
>miR2867-3p Score: 1.5 R03G\_01951  
Query: 1 TCAGGACTTTGGGATGGCCA 20  
|||||||:|\*|||  
Sbjct: 815 AGTCCTGAAACTCGACCGGT 796  
>miR2867-3p Score: 2.0 R03G\_01962  
Query: 1 TCAGGACTTTGGGATGGCCA 20  
||\*|||\*|||  
Sbjct: 566 AGACCTGAAACACTACCGGT 547  
>miR2867-3p Score: 0.0 R03G\_17449  
Query: 1 TCAGGACTTTGGGATGGCCA 20  
|||||||  
Sbjct: 815 AGTCCTGAAACCCTACCGGT 796  
>miR2867-3p Score: 2.5 R03G\_17436  
Query: 1 TCAGGACTTTGGGATGGCCA 20  
|||||||:|\*\*|||  
Sbjct: 632 AGTCCTGAAACTCGTCCGGT 613  
>miR2867-3p Score: 2.0 R03G\_17416  
Query: 1 TCAGGACTTTGGGATGGCCA 20  
||\*|||\*|||  
Sbjct: 815 AGACCTGAAACACTACCGGT 796  
>miR2867-3p Score: 1.5 R03G\_17409  
Query: 1 TCAGGACTTTGGGATGGCCA 20  
|||||||:|\*|||  
Sbjct: 815 AGTCCTGAAACTCGACCGGT 796  
>miR2867-3p Score: 2.0 R03G\_17406  
Query: 1 TCAGGACTTTGGGATGGCCA 20  
||\*|||\*|||  
Sbjct: 176 AGCCCTGAAACCCGACCGGT 157  
>miR2867-3p Score: 2.0 R03G\_17399  
Query: 1 TCAGGACTTTGGGATGGCCA 20

||\*|||||||\*|||||||  
Sbjct: 815 AGACCTGAAACACTACCGGT 796  
>miR2867-3p Score: 2.0 R03G\_17387  
Query: 1 TCAGGACTTTGGGATGGCCA 20  
||\*|||||||\*|||||||  
Sbjct: 815 AGACCTGAAACACTACCGGT 796  
>miR2867-3p Score: 2.0 R03G\_17355  
Query: 1 TCAGGACTTTGGGATGGCCA 20  
||\*|||||||\*|||||||  
Sbjct: 650 AGACCTGAAACACTACCGGT 631  
>miR2867-3p Score: 2.0 R03G\_17291  
Query: 1 TCAGGACTTTGGGATGGCCA 20  
||\*|||||||\*|||||||  
Sbjct: 815 AGACCTGAAACACTACCGGT 796  
>miR2867-3p Score: 2.5 R03G\_17293  
Query: 1 TCAGGACTTTGGGATGGCCA 20  
|||||||:|\*\*|||  
Sbjct: 632 AGTCCTGAAACTCGTCCGGT 613  
>miR5554a-5p Score: 1.0 R03G\_17220  
Query: 1 TGTTGCAGATCTTGAACAATGTT 23  
|||||||\*|||||  
Sbjct: 131 ACAACGTCTAGAACTCGTTACAA 109  
>miR5554a-5p Score: 0.0 R03G\_16903  
Query: 1 TGTTGCAGATCTTGAACAATGTT 23  
|||||||  
Sbjct: 68 ACAACGTCTAGAACTTGTTACAA 46  
>miR5554a-5p Score: 0.0 R03G\_14562  
Query: 1 TGTTGCAGATCTTGAACAATGTT 23  
|||||||  
Sbjct: 68 ACAACGTCTAGAACTTGTTACAA 46  
>miR5554a-5p Score: 2.5 R03G\_12583  
Query: 1 TGTTGCAGATCTTGAACAATGTT 23  
|\*|||||||\*|||||||\*||  
Sbjct: 443 AAAACGTCTAAAACCTTGTTA-AA 422  
>miR5554a-5p Score: 2.5 R03G\_08022  
Query: 1 TGTTGCAGATCTTGAACAATGTT 23  
|||||||\*|||\*|||\*||  
Sbjct: 252 ACAACGTCTAGCACTT-TTAGAA 231  
>miR5554a-5p Score: 0.0 R03G\_07863  
Query: 1 TGTTGCAGATCTTGAACAATGTT 23  
|||||||  
Sbjct: 131 ACAACGTCTAGAACTTGTTACAA 109  
>miR7539 Score: 0.0 R03G\_01611  
Query: 1 TGAGAGAGAAGAGCTATGAGG 21  
|||||||





>miR3703 Score: 2.5 R03G\_11638  
Query: 1 TAGATTCATCAGCCATTGCC 20  
||\*||\*||||||||||||\*||  
Sbjct: 583 ATATATGTAGTCGGTAA-GG 565

>miR3703 Score: 2.5 R03G\_11706  
Query: 1 TAGATTCATCAGCCATTGCC 20  
|\*:||||||||||||\*|\*  
Sbjct: 610 ACTTAAGTAGTCGGTAAAGA 591

>miR3703 Score: 1.0 R03G\_09601  
Query: 1 TAGATTCATCAGCCATTGCC 20  
|\*|||||||||||||||  
Sbjct: 1342 AACTAAGTAGTCGGTAACGG 1323

>miR3703 Score: 1.0 R03G\_09930  
Query: 1 TAGATTCATCAGCCATTGCC 20  
|\*|||||||||||||||  
Sbjct: 1342 AACTAAGTAGTCGGTAACGG 1323

>miR3703 Score: 1.0 R03G\_10217  
Query: 1 TAGATTCATCAGCCATTGCC 20  
|\*|||||||||||||||  
Sbjct: 1342 AACTAAGTAGTCGGTAACGG 1323

>miR3703 Score: 1.0 R03G\_07980  
Query: 1 TAGATTCATCAGCCATTGCC 20  
|\*|||||||||||||||  
Sbjct: 730 AACTAAGTAGTCGGTAACGG 711

>miR3703 Score: 2.2 R03G\_08415  
Query: 1 TAGATTCATCAGCCATTGCC 20  
:|:|:|\*|||||||||||  
Sbjct: 397 GTTTGAGAAGTCGGTAACGG 378

>miR3703 Score: 1.0 R03G\_06731  
Query: 1 TAGATTCATCAGCCATTGCC 20  
|\*|||||||||||||||  
Sbjct: 1342 AACTAAGTAGTCGGTAACGG 1323

>miR3703 Score: 1.0 R03G\_07307  
Query: 1 TAGATTCATCAGCCATTGCC 20  
|\*|||||||||||||||  
Sbjct: 1342 AACTAAGTAGTCGGTAACGG 1323

>miR3703 Score: 1.0 R03G\_07698  
Query: 1 TAGATTCATCAGCCATTGCC 20  
|\*|||||||||||||||  
Sbjct: 1342 AACTAAGTAGTCGGTAACGG 1323

>miR3703 Score: 1.0 R03G\_07721  
Query: 1 TAGATTCATCAGCCATTGCC 20  
|\*|||||||||||||||  
Sbjct: 1273 AACTAAGTAGTCGGTAACGG 1254

>miR3703 Score: 1.0 R03G\_07737

Query: 1 TAGATTCATCAGCCATTGCC 20  
|\*|||||||||||||||||  
Sbjct: 703 AACTAAGTAGTCGGTAACGG 684  
>miR3703 Score: 2.2 R03G\_07895  
Query: 1 TAGATTCATCAGCCATTGCC 20  
:|||||||:|||||||\*\*\*  
Sbjct: 892 GTCTAAGTGGTCGGTAAAAT 873  
>miR3703 Score: 1.5 R03G\_05557  
Query: 1 TAGATTCATCAGCCATTGCC 20  
|||||||||||||||||:~\*~\*  
Sbjct: 988 ATCTAAGTAGTCGGTAG-GT 970  
>miR3703 Score: 0.0 R03G\_04592  
Query: 1 TAGATTCATCAGCCATTGCC 20  
|||||||||||||||||  
Sbjct: 514 ATCTAAGTAGTCGGTAACGG 495  
>miR3703 Score: 1.0 R03G\_04683  
Query: 1 TAGATTCATCAGCCATTGCC 20  
|\*|||||||||||||||||  
Sbjct: 1342 AACTAAGTAGTCGGTAACGG 1323  
>miR3703 Score: 1.0 R03G\_04212  
Query: 1 TAGATTCATCAGCCATTGCC 20  
|\*|||||||||||||||||  
Sbjct: 1342 AACTAAGTAGTCGGTAACGG 1323  
>miR3703 Score: 1.8 R03G\_00332  
Query: 1 TAGATTCATCAGCCATTGCC 20  
:|:||||\*|||||||||||||  
Sbjct: 397 GTTTAAGAAGTCGGTAACGG 378  
>miR3703 Score: 1.0 R03G\_01727  
Query: 1 TAGATTCATCAGCCATTGCC 20  
|\*|||||||||||||||||  
Sbjct: 427 AACTAAGTAGTCGGTAACGG 408  
>miR7543 Score: 2.2 R03G\_16327  
Query: 1 TTCATATACATGTTTGACAA 20  
:||||\*|:|||||:|||||||  
Sbjct: 198 GAGTACGTGTACGAACTGTT 179  
>miR7543 Score: 2.5 R03G\_15734  
Query: 1 TTCATATACATGTTTGAC-AA 20  
||||||:|\*||:||||\*||  
Sbjct: 1176 AAGTATGTGAACGAACTGCTT 1156  
>miR7543 Score: 0.0 R03G\_14371  
Query: 1 TTCATATACATGTTTGACAA 20  
|||||||||||||||||  
Sbjct: 645 AAGTATATGTACAAACTGTT 626  
>miR7543 Score: 2.5 R03G\_13867  
Query: 1 TTCATATACATGTTTGACAA 20

||||:|||||||:|\*|  
Sbjct: 1013 AAGTGTATGTACAAGTTCAT 994  
>miR7543 Score: 0.5 R03G\_13908  
Query: 1 TTCATATACATGTTTGACAA 20  
|||||||:|||||||  
Sbjct: 480 AAGTATATGTACGAACTGTT 461  
>miR7543 Score: 0.5 R03G\_12320  
Query: 1 TTCATATACATGTTTGACAA 20  
|||||||:|||||||  
Sbjct: 597 AAGTATATGTACGAACTGTT 578  
>miR7543 Score: 2.5 R03G\_11852  
Query: 1 TTCATATACATGTTTGACAA 20  
|||||\*|||||||:|\*|\*  
Sbjct: 288 AAGTATTTGTACAAATTATG 269  
>miR7543 Score: 1.5 R03G\_10438  
Query: 1 TTCATATACATGTTTGACAA 20  
|||||||:|||\*|||  
Sbjct: 189 AAGTATATGTACGAACAGTT 170  
>miR7543 Score: 2.5 R03G\_08239  
Query: 1 TTCATATACATGTTTGACAA 20  
|||||\*|||||||\*|\*||  
Sbjct: 333 AAGTATTTGTACAAAAT-TT 315  
>miR7543 Score: 2.2 R03G\_08601  
Query: 1 TTCATATACATGTTTGACAA 20  
:|||||\*|||||||:|||\*  
Sbjct: 206 GAGTATTTGTACAAATTGTG 187  
>miR7543 Score: 0.5 R03G\_05704  
Query: 1 TTCATATACATGTTTGACAA 20  
|||||||:|||||||  
Sbjct: 597 AAGTATATGTACGAACTGTT 578  
>miR7543 Score: 2.5 R03G\_04493  
Query: 1 TTCATATACATGTTTGACAA 20  
|||||||\*|||:|||||||  
Sbjct: 108 AAGTATACATACGAACTGTT 89  
>miR7543 Score: 1.5 R03G\_02935  
Query: 1 TTCATATACATGTTTGACAA 20  
|||||||:|||\*|||  
Sbjct: 210 AAGTATATGTACGAACCGTT 191  
>miR7543 Score: 2.5 R03G\_03353  
Query: 1 TTCATATACATGTTTGACAA 20  
|||||||\*||:|||||||  
Sbjct: 540 AAGTATTCGTGCAAACCTGTT 521  
>miR7543 Score: 2.5 R03G\_04007  
Query: 1 TTCATATACATGTTTGACAA 20  
||||||\*||\*|||||:|||||

Sbjct: 1158 AAGTATCTGAACAAATTGTT 1139  
>miR7543 Score: 2.5 R03G\_00576  
Query: 1 TTCATATACATGTTTGAC-AA 20  
|:|||||||\*|||:|\*||  
Sbjct: 59 AGGTATATGTAGAAATTGGTT 39  
>miR7543 Score: 2.5 R03G\_00599  
Query: 1 TTCATATACATGTTTGAC-AA 20  
|:|||||||\*|||:|\*||  
Sbjct: 1698 AGGTATATGTAGAAATTGGTT 1678  
>miR7543 Score: 0.0 R03G\_00716  
Query: 1 TTCATATACATGTTTGACAA 20  
|||||||  
Sbjct: 630 AAGTATATGTACAAACTGTT 611  
>miR7543 Score: 0.5 R03G\_01392  
Query: 1 TTCATATACATGTTTGACAA 20  
|||||||:|||||  
Sbjct: 108 AAGTATATGTACGAACTGTT 89  
>miR7543 Score: 2.5 R03G\_01429  
Query: 1 TTCATATACATGTTTGAC-AA 20  
|:|||||||\*|||:|\*||  
Sbjct: 1872 AGGTATATGTAGAAATTGGTT 1852  
>miR8554 Score: 0.0 R03G\_13701  
Query: 1 TGCTTATGACTTTGATTTGGGA 22  
|||||||  
Sbjct: 2762 ACGAATACTGAAACTAAACCCT 2741  
>miR8554 Score: 0.0 R03G\_13855  
Query: 1 TGCTTATGACTTTGATTTGGGA 22  
|||||||  
Sbjct: 2762 ACGAATACTGAAACTAAACCCT 2741  
>miR8554 Score: 0.0 R03G\_12014  
Query: 1 TGCTTATGACTTTGATTTGGGA 22  
|||||||  
Sbjct: 2762 ACGAATACTGAAACTAAACCCT 2741  
>miR8554 Score: 0.0 R03G\_12067  
Query: 1 TGCTTATGACTTTGATTTGGGA 22  
|||||||  
Sbjct: 2762 ACGAATACTGAAACTAAACCCT 2741  
>miR8554 Score: 0.0 R03G\_12462  
Query: 1 TGCTTATGACTTTGATTTGGGA 22  
|||||||  
Sbjct: 2618 ACGAATACTGAAACTAAACCCT 2597  
>miR8554 Score: 0.0 R03G\_10222  
Query: 1 TGCTTATGACTTTGATTTGGGA 22  
|||||||  
Sbjct: 2762 ACGAATACTGAAACTAAACCCT 2741

>miR8554 Score: 0.0 R03G\_03575  
Query: 1 TGCTTATGACTTTGATTTGGGA 22  
|||||  
Sbjct: 2762 ACGAATACTGAAACTAAACCCT 2741

>miR8554 Score: 0.0 R03G\_03752  
Query: 1 TGCTTATGACTTTGATTTGGGA 22  
|||||  
Sbjct: 2762 ACGAATACTGAAACTAAACCCT 2741

>miR8554 Score: 0.0 R03G\_03796  
Query: 1 TGCTTATGACTTTGATTTGGGA 22  
|||||  
Sbjct: 1955 ACGAATACTGAAACTAAACCCT 1934

>miR1172.1 Score: 1.8 R03G\_16901  
Query: 1 AGGATTTGCAGCAGCAAAGGAG 22  
\*||||\*|||||:  
Sbjct: 1074 ACCTAACCGTCGTCGTTTCCTT 1053

>miR1172.1 Score: 1.8 R03G\_16917  
Query: 1 AGGATTTGCAGCAGCAAAGGAG 22  
\*||||\*|||||:  
Sbjct: 1080 ACCTAACCGTCGTCGTTTCCTT 1059

>miR1172.1 Score: 1.8 R03G\_16743  
Query: 1 AGGATTTGCAGCAGCAAAGGAG 22  
\*||||\*|||||:  
Sbjct: 1026 ACCTAACCGTCGTCGTTTCCTT 1005

>miR1172.1 Score: 1.8 R03G\_15879  
Query: 1 AGGATTTGCAGCAGCAAAGGAG 22  
\*||||\*|||||:  
Sbjct: 987 ACCTAACCGTCGTCGTTTCCTT 966

>miR1172.1 Score: 1.8 R03G\_15581  
Query: 1 AGGATTTGCAGCAGCAAAGGAG 22  
\*||||\*|||||:  
Sbjct: 237 ACCTAACCGTCGTCGTTTCCTT 216

>miR1172.1 Score: 1.8 R03G\_12975  
Query: 1 AGGATTTGCAGCAGCAAAGGAG 22  
\*||||\*|||||:  
Sbjct: 366 ACCTAACCGTCGTCGTTTCCTT 345

>miR1172.1 Score: 1.8 R03G\_12011  
Query: 1 AGGATTTGCAGCAGCAAAGGAG 22  
\*||||\*|||||:  
Sbjct: 1068 ACCTAACCGTCGTCGTTTCCTT 1047

>miR1172.1 Score: 1.8 R03G\_12078  
Query: 1 AGGATTTGCAGCAGCAAAGGAG 22  
\*||||\*|||||:  
Sbjct: 768 ACCTAACCGTCGTCGTTTCCTT 747

>miR1172.1 Score: 1.8 R03G\_12645

Query: 1 AGGATTTGCAGCAGCAAAGGAG 22  
\*|||||\*|||||||:|  
Sbjct: 240 ACCTAACCGTCGTCGTTTCCTT 219  
>miR1172.1 Score: 1.8 R03G\_10043  
Query: 1 AGGATTTGCAGCAGCAAAGGAG 22  
\*|||||\*|||||||:|  
Sbjct: 975 ACCTAACCGTCGTCGTTTCCTT 954  
>miR1172.1 Score: 1.8 R03G\_07115  
Query: 1 AGGATTTGCAGCAGCAAAGGAG 22  
\*|||||\*|||||||:|  
Sbjct: 1023 CCCTAATCGTCGTCGTTTTCTC 1002  
>miR1172.1 Score: 1.8 R03G\_07692  
Query: 1 AGGATTTGCAGCAGCAAAGGAG 22  
\*|||||\*|||||||:|  
Sbjct: 1002 ACCTAACCGTCGTCGTTTCCTT 981  
>miR1172.1 Score: 1.8 R03G\_05907  
Query: 1 AGGATTTGCAGCAGCAAAGGAG 22  
\*|||||\*|||||||:|  
Sbjct: 282 ACCTAACCGTCGTCGTTTCCTT 261  
>miR1172.1 Score: 1.8 R03G\_04659  
Query: 1 AGGATTTGCAGCAGCAAAGGAG 22  
\*|||||\*|||||||:|  
Sbjct: 1002 ACCTAACCGTCGTCGTTTCCTT 981  
>miR1172.1 Score: 1.8 R03G\_02817  
Query: 1 AGGATTTGCAGCAGCAAAGGAG 22  
\*|||||\*|||||||:|  
Sbjct: 1068 ACCTAACCGTCGTCGTTTCCTT 1047  
>miR1172.1 Score: 0.5 R03G\_00600  
Query: 1 AGGATTTGCAGCAGCAAAGGAG 22  
\*|||||||:|  
Sbjct: 879 ACCTAACCGTCGTCGTTTCCTC 858  
>miR1172.1 Score: 1.8 R03G\_01325  
Query: 1 AGGATTTGCAGCAGCAAAGGAG 22  
\*|||||\*|||||||:|  
Sbjct: 177 ACCTAACCGTCGTCGTTTCCTT 156  
>miR1172.1 Score: 1.8 R03G\_01717  
Query: 1 AGGATTTGCAGCAGCAAAGGAG 22  
\*|||||\*|||||||:|  
Sbjct: 1071 ACCTAACCGTCGTCGTTTCCTT 1050  
>miR1172.1 Score: 1.8 R03G\_17433  
Query: 1 AGGATTTGCAGCAGCAAAGGAG 22  
\*|||||\*|||||||:|  
Sbjct: 1065 ACCTAACCGTCGTCGTTTCCTT 1044  
>miR5080 Score: 0.0 R03G\_17260  
Query: 1 AAAAGGATCATGACGGTACATG 22

|||||  
Sbjct: 998 TTTTCCTAGTACTGCCATGTAC 977  
>miR5080 Score: 2.5 R03G\_17226  
Query: 1 AAAAGGATCATGACGGTACATG 22  
|||||\*|||||:||||\*|\*  
Sbjct: 1122 TTTTCCTAGCACTGCTATGAAA 1101  
>miR5080 Score: 0.0 R03G\_16733  
Query: 1 AAAAGGATCATGACGGTACATG 22  
|||||  
Sbjct: 1119 TTTTCCTAGTACTGCCATGTAC 1098  
>miR5080 Score: 0.0 R03G\_16812  
Query: 1 AAAAGGATCATGACGGTACATG 22  
|||||  
Sbjct: 1119 TTTTCCTAGTACTGCCATGTAC 1098  
>miR5080 Score: 2.5 R03G\_16815  
Query: 1 AAAAGGATCATGACGGTACATG 22  
|||||\*|||||:||||\*|\*  
Sbjct: 1122 TTTTCCTAGCACTGCTATGAAA 1101  
>miR5080 Score: 2.5 R03G\_16392  
Query: 1 AAAAGGATCATGACGGTACATG 22  
|||||\*|||||:||||\*|\*  
Sbjct: 102 TTTTCCTAGCACTGCTATGAAA 81  
>miR5080 Score: 0.0 R03G\_15270  
Query: 1 AAAAGGATCATGACGGTACATG 22  
|||||  
Sbjct: 168 TTTTCCTAGTACTGCCATGTAC 147  
>miR5080 Score: 0.0 R03G\_14791  
Query: 1 AAAAGGATCATGACGGTACATG 22  
|||||  
Sbjct: 1119 TTTTCCTAGTACTGCCATGTAC 1098  
>miR5080 Score: 2.5 R03G\_14795  
Query: 1 AAAAGGATCATGACGGTACATG 22  
|||||\*|||||:||||\*|\*  
Sbjct: 1122 TTTTCCTAGCACTGCTATGAAA 1101  
>miR5080 Score: 0.0 R03G\_14798  
Query: 1 AAAAGGATCATGACGGTACATG 22  
|||||  
Sbjct: 1119 TTTTCCTAGTACTGCCATGTAC 1098  
>miR5080 Score: 2.0 R03G\_08770  
Query: 1 AAAAGGATCATGACGGTA-CATG 22  
|||||\*|||||\*||\*|  
Sbjct: 311 TTTTCCTAGTTCTGCCATGGTCC 289  
>miR5080 Score: 0.0 R03G\_09180  
Query: 1 AAAAGGATCATGACGGTACATG 22  
|||||





>miR5037c Score: 2.2 R03G\_12169  
Query: 1 AGTTGAACTTTGGGCCCG 18  
||||\*|||||||\*|:  
Sbjct: 305 TCAAATTGAAACCCGTGT 288

>miR5037c Score: 2.2 R03G\_11404  
Query: 1 AGTTGAACTTTGGGCCCG 18  
||||\*|||||||\*|:  
Sbjct: 305 TCAAATTGAAACCCGTGT 288

>miR5037c Score: 2.2 R03G\_11771  
Query: 1 AGTTGAACTTTGGGCCCG 18  
||||\*|||||||\*|:  
Sbjct: 305 TCAAATTGAAACCCGTGT 288

>miR5037c Score: 2.2 R03G\_10725  
Query: 1 AGTTGAACTTTGGGCCCG 18  
||||\*|||||||\*|:  
Sbjct: 269 TCAAATTGAAACCCGTGT 252

>miR5037c Score: 2.2 R03G\_09192  
Query: 1 AGTTGAACTTTGGGCCCG 18  
||||\*|||||||\*|:  
Sbjct: 305 TCAAATTGAAACCCGTGT 288

>miR5037c Score: 2.2 R03G\_09940  
Query: 1 AGTTGAACTTTGGGCCCG 18  
||||\*|||||||\*|:  
Sbjct: 305 TCAAATTGAAACCCGTGT 288

>miR5037c Score: 2.2 R03G\_07130  
Query: 1 AGTTGAACTTTGGGCCCG 18  
||||\*|||||||\*|:  
Sbjct: 209 TCAAATTGAAACCCGTGT 192

>miR5037c Score: 2.2 R03G\_07686  
Query: 1 AGTTGAACTTTGGGCCCG 18  
||||\*|||||||\*|:  
Sbjct: 305 TCAAATTGAAACCCGTGT 288

>miR5037c Score: 2.2 R03G\_07976  
Query: 1 AGTTGAACTTTGGGCCCG 18  
||||\*|||||||\*|:  
Sbjct: 305 TCAAATTGAAACCCGTGT 288

>miR5037c Score: 2.2 R03G\_05631  
Query: 1 AGTTGAACTTTGGGCCCG 18  
||||\*|||||||\*|:  
Sbjct: 305 TCAAATTGAAACCCGTGT 288

>miR5037c Score: 2.2 R03G\_03555  
Query: 1 AGTTGAACTTTGGGCCCG 18  
||||\*|||||||\*|:  
Sbjct: 305 TCAAATTGAAACCCGTGT 288

>miR5037c Score: 2.2 R03G\_03574

Query: 1 AGTTGAACTTTGGGCCCG 18  
||||\*|||||||\*|:  
Sbjct: 188 TCAAATTGAAACCCGTGT 171  
>miR5037c Score: 2.5 R03G\_03632  
Query: 1 AGTTGAACTTTGGGCCCG 18  
|:||||\*|||||||\*||  
Sbjct: 353 TTAAGTGGAAACCCGTGC 336  
>miR5037c Score: 2.2 R03G\_01207  
Query: 1 AGTTGAACTTTGGGCCCG 18  
||||\*|||||||\*|:  
Sbjct: 305 TCAAATTGAAACCCGTGT 288  
>miR5037c Score: 2.2 R03G\_01309  
Query: 1 AGTTGAACTTTGGGCCCG 18  
||||\*|||||||\*|:  
Sbjct: 254 TCAAATTGAAACCCGTGT 237  
>miR5037c Score: 2.5 R03G\_01807  
Query: 1 AGTTGAACTTTGGGCCCG 18  
|||||||\*:::||||\*  
Sbjct: 590 TCAACTTGATGTCCGGGG 573  
>miR5037c Score: 2.2 R03G\_17385  
Query: 1 AGTTGAACTTTGGGCCCG 18  
||||\*|||||||\*|:  
Sbjct: 305 TCAAATTGAAACCCGTGT 288  
>miR5037c Score: 2.2 R03G\_17358  
Query: 1 AGTTGAACTTTGGGCCCG 18  
||||\*|||||||\*|:  
Sbjct: 305 TCAAATTGAAACCCGTGT 288  
>miR5037c Score: 2.2 R03G\_17356  
Query: 1 AGTTGAACTTTGGGCCCG 18  
||||\*|||||||\*|:  
Sbjct: 215 TCAAATTGAAACCCGTGT 198  
>miR396a-3p Score: 2.2 R03G\_11676  
Query: 1 GTTCAATAAAGCTGTGGGAA 20  
:|||||||:||||:\*\*|  
Sbjct: 1432 TAAGTATTTTGACACTAAT 1413  
>miR396a-3p Score: 2.5 R03G\_08313  
Query: 1 GTTCAATAAAGCTGTGGGAA 20  
||:|||||||\*||\*|\*  
Sbjct: 1089 CAGGTTATTTGAAACC-TA 1071  
>miR396a-3p Score: 2.0 R03G\_02514  
Query: 1 GTTCAATAAAGCTGTGGGAA 20  
:|||||||\*||||:|  
Sbjct: 471 TAAGTATTTGGACTTTT 452  
>miR4221 Score: 0.5 R03G\_12138  
Query: 1 TAAGAGTTCAAAGGTAGGAAA 23



Sbjct: 273 TCCTAGTCTTCCTCTGTCGTC 253  
>miR156i Score: 0.0 R03G\_12964  
Query: 1 TGGAACAGAAGAAGACAGCAG 21  
|||||

Sbjct: 2613 ACCTTGCTTCTTCTGTCGTC 2593  
>miR156i Score: 2.5 R03G\_11279  
Query: 1 TGGAACAGAAGAAGACAGCAG 21  
\*|:|\*|

Sbjct: 1995 TCTTCGTCTTCTTCTGTCGCC 1975  
>miR156i Score: 0.0 R03G\_11952  
Query: 1 TGGAACAGAAGAAGACAGCAG 21  
|||||

Sbjct: 2991 ACCTTGCTTCTTCTGTCGTC 2971  
>miR156i Score: 2.5 R03G\_07729  
Query: 1 TGGAACAGAAGAAGACAGCAG 21  
|||||:|||||:|\*||\*|||

Sbjct: 805 ACCTTGTTTTCTTTCGTGGTC 785  
>miR156i Score: 2.5 R03G\_07865  
Query: 1 TGGAACAGAAGAAGACAGCAG 21  
\*|:|\*|

Sbjct: 765 TCTTCGTCTTCTTCTGTCGCC 745  
>miR156i Score: 2.5 R03G\_02682  
Query: 1 TGGAACAGAAGAAGACAGCAG 21  
|||||:|||||:|\*||\*|||

Sbjct: 1036 ACCTTGTTTTCTTTCGTGGTC 1016  
>miR156i Score: 0.0 R03G\_00686  
Query: 1 TGGAACAGAAGAAGACAGCAG 21  
|||||

Sbjct: 336 ACCTTGCTTCTTCTGTCGTC 316  
>miR156i Score: 2.5 R03G\_01721  
Query: 1 TGGAACAGAAGAAGACAGCAG 21  
\*|:|\*|

Sbjct: 891 TCTTCGTCTTCTTCTGTCGCC 871  
>miR4374b Score: 1.8 R03G\_16714  
Query: 1 TCTTCAAAGACGGTTGTGAG 20  
||||\*|

Sbjct: 209 AGAAGATTCTGCCAACAGTT 190  
>miR4374b Score: 2.5 R03G\_16803  
Query: 1 TCTTCAAAGACGGTTGTGAG 20  
||||\*|\*|

Sbjct: 92 AGAAGATCCTGCCAACAGTC 73  
>miR4374b Score: 0.0 R03G\_14983  
Query: 1 TCTTCAAAGACGGTTGTGAG 20  
|||||

Sbjct: 656 AGAAGTTTCTGCCAACACTC 637



Query: 1 TCTTCAAAGACGGTTGTGAG 20  
||||\*|\*|||||||\*||  
Sbjct: 92 AGAAGATCCTGCCAACAGTC 73  
>miR4374b Score: 0.0 R03G\_17462  
Query: 1 TCTTCAAAGACGGTTGTGAG 20  
|||||||  
Sbjct: 983 AGAAGTTTCTGCCAACACTC 964  
>miR4374b Score: 0.0 R03G\_17451  
Query: 1 TCTTCAAAGACGGTTGTGAG 20  
|||||||  
Sbjct: 92 AGAAGTTTCTGCCAACACTC 73  
>miR4374b Score: 2.5 R03G\_17374  
Query: 1 TCTTCAAAGACGGTTGTGAG 20  
||||\*|\*|||||||\*||  
Sbjct: 92 AGAAGATCCTGCCAACAGTC 73  
>miR4374b Score: 2.5 R03G\_17281  
Query: 1 TCTTCAAAGACGGTTGTGAG 20  
||||\*|\*|||||||\*||  
Sbjct: 92 AGAAGATCCTGCCAACAGTC 73  
>miR826b Score: 2.5 R03G\_16423  
Query: 1 TGGTCTTGACATCGATGAAAAT 22  
|:|\*|\*|||||||\*|\*|  
Sbjct: 53 ATCTGAACTGTAGCTACTGTAA 32  
>miR826b Score: 2.5 R03G\_15253  
Query: 1 TGGTCTTGACATCGATGAAAAT 22  
|:|\*|\*|||||||\*|\*|  
Sbjct: 53 ATCTGAACTGTAGCTACTGTAA 32  
>miR826b Score: 2.5 R03G\_12175  
Query: 1 TGGTCTTGACATCGATGAAAAT 22  
|:|\*|\*|||||||\*|\*|  
Sbjct: 53 ATCTGAACTGTAGCTACTGTAA 32  
>miR826b Score: 2.5 R03G\_01713  
Query: 1 TGGTCTTGACATCGATGAAAAT 22  
|:|\*|\*|||||||\*|\*|  
Sbjct: 53 ATCTGAACTGTAGCTACTGTAA 32  
>miR7800 Score: 2.5 R03G\_16617  
Query: 1 TATTTTTGTCTCGTCTGGTC 20  
\*|:|::|\*|||  
Sbjct: 115 CTGAAAGTAGAGCAGAC-AG 97  
>miR7800 Score: 1.0 R03G\_16359  
Query: 1 TATTTTTGTCTCGTCTGGTC 20  
|||:|:|  
Sbjct: 456 ATAAAAGCAGAGCAGACTGG 437  
>miR7800 Score: 1.5 R03G\_16363  
Query: 1 TATTTTTGTCTCGTCTGGTC 20

\*|||||||:|::|  
Sbjct: 456 CTAAAAACAGAGCAGGCTGG 437  
>miR7800 Score: 1.0 R03G\_16545  
Query: 1 TATTTTGTCTCGTCTGGTC 20  
|||||:|||||||:|  
Sbjct: 456 ATAAAAGCAGAGCAGACTGG 437  
>miR7800 Score: 1.0 R03G\_16554  
Query: 1 TATTTTGTCTCGTCTGGTC 20  
\*|||||||:|  
Sbjct: 456 CTAAAAACAGAGCAGACTGG 437  
>miR7800 Score: 2.2 R03G\_16206  
Query: 1 TATTTTGTCTCGTCTGGTC 20  
|||:|:||||\*|||||:|  
Sbjct: 2221 ATAGAAGCAGAACAGACCGG 2202  
>miR7800 Score: 2.0 R03G\_15651  
Query: 1 TATTTTGTCTCGTCTGGTC 20  
\*|||||||\*||||||\*||  
Sbjct: 250 CTAAAAACATAGCAGAC-AG 232  
>miR7800 Score: 2.0 R03G\_15575  
Query: 1 TATTTTGTCTCGTCTGGTC 20  
|||||:||||||\*||:|  
Sbjct: 279 ATAAAAGCAGAGCAAAGTGG 260  
>miR7800 Score: 2.5 R03G\_15579  
Query: 1 TATTTTGTCTCGTCTGGTC 20  
\*||:|||||||:|:|:|  
Sbjct: 456 CTAGAAACAGAGTAGGCTGG 437  
>miR7800 Score: 1.0 R03G\_15001  
Query: 1 TATTTTGTCTCGTCTGGTC 20  
|||||:|||||||:|  
Sbjct: 279 ATAAAAGCAGAGCAGACTGG 260  
>miR7800 Score: 1.0 R03G\_15146  
Query: 1 TATTTTGTCTCGTCTGGTC 20  
\*|||||||:|  
Sbjct: 336 CTAAAAACAGAGCAGACTGG 317  
>miR7800 Score: 2.5 R03G\_14567  
Query: 1 TATTTTGTCTCGTCTGGTC 20  
\*||:|||||||:|:|:|  
Sbjct: 234 CTAGAAACAGAGTAGGCTGG 215  
>miR7800 Score: 2.5 R03G\_14150  
Query: 1 TATTTTGTCTCGTCTGGTC 20  
|||:||||:|:|\*|||  
Sbjct: 137 ATAGAAACGGAGTAGAGCAG 118  
>miR7800 Score: 2.5 R03G\_14349  
Query: 1 TATTTTGTCTCGTCTGGTC 20  
\*|:|||||||:|:|:|



Sbjct: 456 CTGAAAACAGAGTAGGCTGG 437  
>miR7800 Score: 2.5 R03G\_13502  
Query: 1 TATTTTTGTCTCGTCTGGTC 20  
||||:|\*||||\*|||||

Sbjct: 287 ATAAGAAAAGAGCTGACCAG 268  
>miR7800 Score: 2.0 R03G\_13718  
Query: 1 TATTTTTGTCTCGTCTGGTC 20  
\*|||||||:|:|:|

Sbjct: 234 CTAAAACAGAGTAGGCTGG 215  
>miR7800 Score: 2.0 R03G\_13733  
Query: 1 TATTTTTGTCTCGTCTGGTC 20  
\*|||||||:|:|:|

Sbjct: 234 CTAAAACAGAGTAGGCTGG 215  
>miR7800 Score: 2.0 R03G\_13137  
Query: 1 TATTTTTGTCTCGTCTGGTC 20  
\*|||||||:|:|:|

Sbjct: 456 CTAAAACAGAGTAGGCTGG 437  
>miR7800 Score: 2.0 R03G\_13147  
Query: 1 TATTTTTGTCTCGTCTGGTC 20  
\*|||||||:|:|:|

Sbjct: 234 CTAAAACAGAGTAGGCTGG 215  
>miR7800 Score: 1.0 R03G\_13266  
Query: 1 TATTTTTGTCTCGTCTGGTC 20  
|||||:|||||||:|

Sbjct: 234 ATAAAAGCAGAGCAGACTGG 215  
>miR7800 Score: 1.0 R03G\_13271  
Query: 1 TATTTTTGTCTCGTCTGGTC 20  
|||||:|||||||:|

Sbjct: 456 ATAAAAGCAGAGCAGACTGG 437  
>miR7800 Score: 1.0 R03G\_13277  
Query: 1 TATTTTTGTCTCGTCTGGTC 20  
|||||:|||||||:|

Sbjct: 456 ATAAAAGCAGAGCAGACTGG 437  
>miR7800 Score: 1.0 R03G\_11240  
Query: 1 TATTTTTGTCTCGTCTGGTC 20  
|||||:|||||||:|

Sbjct: 279 ATAAAAGCAGAGCAGACTGG 260  
>miR7800 Score: 2.5 R03G\_11254  
Query: 1 TATTTTTGTCTCGTCTGGTC 20  
|\*||||||\*||||\*||

Sbjct: 21 AAAAAACAGAACAGAC-AG 3  
>miR7800 Score: 1.0 R03G\_11266  
Query: 1 TATTTTTGTCTCGTCTGGTC 20  
|||||:|||||||:|

Sbjct: 279 ATAAAAGCAGAGCAGACTGG 260

>miR7800 Score: 2.5 R03G\_10837  
Query: 1 TATTTTGTCTCGTCTGGTC 20  
|||::|||||:|:|\*  
Sbjct: 1170 ATAGGAACAGAGTAGGCCAC 1151

>miR7800 Score: 2.5 R03G\_10846  
Query: 1 TATTTTGTCTCGTCTGGTC 20  
|||::|||||:|:|\*  
Sbjct: 1170 ATAGGAACAGAGTAGGCCAC 1151

>miR7800 Score: 1.0 R03G\_10866  
Query: 1 TATTTTGTCTCGTCTGGTC 20  
|||||:|||||||:|  
Sbjct: 456 ATAAAAGCAGAGCAGACTGG 437

>miR7800 Score: 1.0 R03G\_09612  
Query: 1 TATTTTGTCTCGTCTGGTC 20  
|||||:|||||||:|  
Sbjct: 456 ATAAAAGCAGAGCAGACTGG 437

>miR7800 Score: 1.0 R03G\_08663  
Query: 1 TATTTTGTCTCGTCTGGTC 20  
|||||:|||||||:|  
Sbjct: 456 ATAAAAGCAGAGCAGACTGG 437

>miR7800 Score: 1.5 R03G\_08842  
Query: 1 TATTTTGTCTCGTCTGGTC 20  
\*|||||||:|:|  
Sbjct: 456 CTAAAACAGAGCAGGCTGG 437

>miR7800 Score: 2.2 R03G\_08964  
Query: 1 TATTTTGTCTCGTCTGGTC 20  
|||\*|:|||||:|||||:|  
Sbjct: 921 ATATAGACAGAGTAGACCGG 902

>miR7800 Score: 1.0 R03G\_07031  
Query: 1 TATTTTGTCTCGTCTGGTC 20  
\*|||||||:|:|  
Sbjct: 456 CTAAAACAGAGCAGACTGG 437

>miR7800 Score: 1.0 R03G\_07112  
Query: 1 TATTTTGTCTCGTCTGGTC 20  
|||||:|||||||:|  
Sbjct: 279 ATAAAAGCAGAGCAGACTGG 260

>miR7800 Score: 1.0 R03G\_07120  
Query: 1 TATTTTGTCTCGTCTGGTC 20  
|||||:|||||||:|  
Sbjct: 279 ATAAAAGCAGAGCAGACTGG 260

>miR7800 Score: 1.5 R03G\_07688  
Query: 1 TATTTTGTCTCGTCTGGTC 20  
|||||:|||||:||||:|  
Sbjct: 456 ATAAAAGCAGAGTAGACTGG 437

>miR7800 Score: 2.0 R03G\_07877

Query: 1 TATTTTTGTCTCGTCTGGTC 20  
\*|||||||:|:|:|  
Sbjct: 234 CTAAAAACAGAGTAGGCTGG 215  
>miR7800 Score: 1.0 R03G\_06722  
Query: 1 TATTTTTGTCTCGTCTGGTC 20  
|||||||:|||||||:|  
Sbjct: 456 ATAAAAGCAGAGCAGACTGG 437  
>miR7800 Score: 2.0 R03G\_02844  
Query: 1 TATTTTTGTCTCGTCTGGTC 20  
\*|||||||:|:|:|  
Sbjct: 234 CTAAAAACAGAGTAGGCTGG 215  
>miR7800 Score: 2.0 R03G\_03017  
Query: 1 TATTTTTGTCTCGTCTGGTC 20  
\*|||||||:|||||||\*|\*  
Sbjct: 163 TTAAAAACGGAGCAGAC-AC 145  
>miR7800 Score: 2.0 R03G\_03113  
Query: 1 TATTTTTGTCTCGTCTGGTC 20  
\*|||||||:|:|:|  
Sbjct: 198 CTAAAAACAGAGTAGGCTGG 179  
>miR7800 Score: 2.0 R03G\_03766  
Query: 1 TATTTTTGTCTCGTCTGGTC 20  
\*|||||||:|:|:|  
Sbjct: 234 CTAAAAACAGAGTAGGCTGG 215  
>miR7800 Score: 2.0 R03G\_03772  
Query: 1 TATTTTTGTCTCGTCTGGTC 20  
\*|||||||:|:|:|  
Sbjct: 456 CTAAAAACAGAGTAGGCTGG 437  
>miR7800 Score: 2.0 R03G\_03803  
Query: 1 TATTTTTGTCTCGTCTGGTC 20  
|||||||:|||||\*||||:|  
Sbjct: 279 ATAAAAGCAGAGAAGACTGG 260  
>miR7800 Score: 2.5 R03G\_03862  
Query: 1 TATTTTTGTCTCGTCTGGTC 20  
\*|||||||:|\*||||\*||  
Sbjct: 752 TTAAAAACAGGACAGACGAG 733  
>miR7800 Score: 2.5 R03G\_04205  
Query: 1 TATTTTTGTCTCGTCTGGTC 20  
\*||:|||||||:|:|:|  
Sbjct: 234 CTAGAAACAGAGTAGGCTGG 215  
>miR7800 Score: 1.0 R03G\_00255  
Query: 1 TATTTTTGTCTCGTCTGGTC 20  
|||||||:|||||||:|  
Sbjct: 456 ATAAAAGCAGAGCAGACTGG 437  
>miR7800 Score: 2.0 R03G\_01618  
Query: 1 TATTTTTGTCTCGTCTGGTC 20

\*|||||||:|:|:|  
Sbjct: 456 CTAAAAACAGAGTAGGCTGG 437  
>miR7800 Score: 2.0 R03G\_17363  
Query: 1 TATTTTGTCTCGTCTGGTC 20  
\*|||||||:|:|:|  
Sbjct: 198 CTAAAAACAGAGTAGGCTGG 179  
>miR9759 Score: 2.2 R03G\_02813  
Query: 1 TAGTAAGCAAGTACGAGTTT-AT 22  
|||||||:||||\*:\*||  
Sbjct: 852 ATCATTCGTTTATGCTAGAAGTA 830  
>miR857 Score: 2.0 R03G\_16060  
Query: 1 TTTTGTATGTTGAAGGTGTG 20  
\*|||:|||||||:||||  
Sbjct: 949 TGAACGTACAACCTTCTACAC 930  
>miR857 Score: 2.5 R03G\_14364  
Query: 1 TTTTGTATGTTGAAGGTGTG 20  
\*||||\*||||||\*|||  
Sbjct: 165 TAAACATCCAACCTTCGACAC 146  
>miR857 Score: 2.2 R03G\_13922  
Query: 1 TTTTGTATGTTGAAGGTGTG 20  
:|||||||:|\*|\*||  
Sbjct: 1540 GAAACATACAACCTTTAA-AC 1522  
>miR857 Score: 2.5 R03G\_12689  
Query: 1 TTTTGTATGTTGAAGGTGTG 20  
\*|:||||:||||\*|||  
Sbjct: 102 CAGACATATAACTTCAACAC 83  
>miR857 Score: 0.8 R03G\_12721  
Query: 1 TTTTGTATGTTGAAGGTGTG 20  
|||||||:|||||:  
Sbjct: 100 AAAACATACAATTTCCACGC 81  
>miR857 Score: 2.2 R03G\_12281  
Query: 1 TTTTGTATGTTGAAGGTGTG 20  
||:||\*|||||||:|\*  
Sbjct: 765 AAGACACACAACCTTCCACGG 746  
>miR857 Score: 2.5 R03G\_10291  
Query: 1 TTTTGTATGTTGAAGGTGTG 20  
||||\*||||\*||||\*|  
Sbjct: 4699 AAAACAAACAACATCCAC-C 4681  
>miR857 Score: 2.2 R03G\_10294  
Query: 1 TTTTGTATGTTGAAGGTGTG 20  
:||:||||||\*||||\*  
Sbjct: 346 GAAGCATACAACCTCCACAA 327  
>miR857 Score: 2.5 R03G\_07876  
Query: 1 TTTTGTATGTTGAAGGTGTG 20  
|||:||||:|:|:|\*||

Sbjct: 25 AAAGCATACGATTTCTAAAC 6  
>miR857 Score: 2.5 R03G\_05896  
Query: 1 TTTTGTATGTTGAAGGTGTG 20  
\*::|||||:\*\*\*||  
Sbjct: 102 TGGACATACAACCTCCGGAC 83  
>miR857 Score: 2.5 R03G\_06365  
Query: 1 TTTTGTATGTTGAAGGTGTG 20  
|||||:|\*|\*|||\*||  
Sbjct: 1203 AAAACGTAAGACTTCCAGAC 1184  
>miR857 Score: 1.5 R03G\_06407  
Query: 1 TTTTGTATGTTGAAGGTGT-G 20  
|:|||||:|||||\*|  
Sbjct: 325 AGAACATACAATTTCCACAGC 305  
>miR857 Score: 2.5 R03G\_04379  
Query: 1 TTTTGTATGTTGAAGGTGTG 20  
||||\*||\*|||\*||  
Sbjct: 188 AAAACCTACTACTCCA-AC 170  
>miR857 Score: 2.5 R03G\_02261  
Query: 1 TTTTGTATGTTGAAGGTGTG 20  
|||||:||||\*||\*::  
Sbjct: 102 AAAACATATAACTACCA-GT 84  
>miR857 Score: 2.5 R03G\_02274  
Query: 1 TTTTGTATGTTGAAGGTGTG 20  
|||||:||||\*||\*::  
Sbjct: 2499 AAAACATACAACCTTTCCGT 2480  
>miR857 Score: 2.2 R03G\_02414  
Query: 1 TTTTGTATGTTGAAGGTGTG 20  
||:||\*|||\*|||\*|||\*  
Sbjct: 765 AAGACACACAACCTCCACGG 746  
>miR857 Score: 2.5 R03G\_02897  
Query: 1 TTTTGTATGTTGAAGGTGTG 20  
|||||\*|||\*||\*||  
Sbjct: 2737 AAAACATAAACTTCCTC-C 2719  
>miR857 Score: 2.2 R03G\_03544  
Query: 1 TTTTGTATGTTGAAGGTGTG 20  
:|||\*|||\*|||\*|||\*  
Sbjct: 51 GAAATTTACAACCTCCATAT 32  
>miR857 Score: 2.5 R03G\_00772  
Query: 1 TTTTGTATGTTGAAGGTG-TG 20  
||\*|||\*|||\*||\*||  
Sbjct: 465 AAACCATACAACCTGCCACCAC 445  
>miR857 Score: 2.5 R03G\_00834  
Query: 1 TTTTGTATGTTGAAGGTGTG 20  
|||||:||\*||\*|||  
Sbjct: 165 AAAACATATAACATTTACAC 146

>miR857 Score: 2.2 R03G\_01274  
Query: 1 TTTTGTATGTTGAAGGTGTG 20  
|||||||:||||\*\*|:  
Sbjct: 397 AAAACATACAATTTCCCGAT 378

>miR857 Score: 2.5 R03G\_17402  
Query: 1 TTTTGTATGTTGAAGGTGTG 20  
:||||\*||||:||||\*|:  
Sbjct: 208 GAAACACACAATTTCCAAAT 189

>miR6185 Score: 0.0 R03G\_13220  
Query: 1 TCTGGCAGCACGGGTAACAGTA 22  
|||||||  
Sbjct: 1227 AGACCGTCGTGCCATTGTCAT 1206

>miR6185 Score: 0.0 R03G\_13223  
Query: 1 TCTGGCAGCACGGGTAACAGTA 22  
|||||||  
Sbjct: 1227 AGACCGTCGTGCCATTGTCAT 1206

>miR6185 Score: 0.0 R03G\_04119  
Query: 1 TCTGGCAGCACGGGTAACAGTA 22  
|||||||  
Sbjct: 1227 AGACCGTCGTGCCATTGTCAT 1206

>miR6185 Score: 0.0 R03G\_04122  
Query: 1 TCTGGCAGCACGGGTAACAGTA 22  
|||||||  
Sbjct: 1227 AGACCGTCGTGCCATTGTCAT 1206

>miR1535a Score: 0.0 R03G\_17160  
Query: 1 TTCTGTTTGTGCGTGATGTCTT 22  
|||||||  
Sbjct: 80 AAGACAAACACGCACTACAGAA 59

>miR1535a Score: 0.0 R03G\_15884  
Query: 1 TTCTGTTTGTGCGTGATGTCTT 22  
|||||||  
Sbjct: 80 AAGACAAACACGCACTACAGAA 59

>miR1535a Score: 2.0 R03G\_09380  
Query: 1 TTCTGTTTGTGCGTGATGTCTT 22  
||\*|||||||\*||:  
Sbjct: 274 AACACAAACACGCACTA-GGAG 254

>miR1535a Score: 0.0 R03G\_09486  
Query: 1 TTCTGTTTGTGCGTGATGTCTT 22  
|||||||  
Sbjct: 80 AAGACAAACACGCACTACAGAA 59

>miR1535a Score: 2.5 R03G\_09571  
Query: 1 TTCTGTTTGTGCGTGATGTCTT 22  
|||\*|||||:||||\*||:  
Sbjct: 960 AAGAGAAACACGTACTA-GGAG 940

>miR1535a Score: 0.2 R03G\_02698

Query: 1 TTCTGTTTGTGCGTGATGTCTT 22  
:|||||  
Sbjct: 80 GAGACAAACACGCACTACAGAA 59  
>miR403a Score: 0.0 R03G\_17252  
Query: 1 TTGACGATTCACGCCAATCTTG 22  
|||||  
Sbjct: 108 AACTGCTAAGTGCGGTTAGAAC 87  
>miR403a Score: 0.0 R03G\_17156  
Query: 1 TTGACGATTCACGCCAATCTTG 22  
|||||  
Sbjct: 348 AACTGCTAAGTGCGGTTAGAAC 327  
>miR403a Score: 1.5 R03G\_16366  
Query: 1 TTGACGATTCACGCCAATCTTG 22  
|||||\*||:|||||  
Sbjct: 2091 AACTGCTAACTGTGGTTAGAAC 2070  
>miR403a Score: 1.5 R03G\_10744  
Query: 1 TTGACGATTCACGCCAATCTTG 22  
|||||\*||:|||||  
Sbjct: 2094 AACTGCTAACTGTGGTTAGAAC 2073  
>miR403a Score: 1.5 R03G\_10745  
Query: 1 TTGACGATTCACGCCAATCTTG 22  
|||||\*||:|||||  
Sbjct: 1062 AACTGCTAACTGTGGTTAGAAC 1041  
>miR403a Score: 1.5 R03G\_07862  
Query: 1 TTGACGATTCACGCCAATCTTG 22  
|||||\*||:|||||  
Sbjct: 2205 AACTGCTAACTGTGGTTAGAAC 2184  
>miR403a Score: 2.5 R03G\_01294  
Query: 1 TTGACGATTCACGCCAATCTTG 22  
|||||\*||\*||:|||||  
Sbjct: 1164 AACTGCCAACTGTGGTTAGAAC 1143  
>miR403a Score: 0.0 R03G\_17453  
Query: 1 TTGACGATTCACGCCAATCTTG 22  
|||||  
Sbjct: 108 AACTGCTAAGTGCGGTTAGAAC 87  
>miR5751 Score: 0.0 R03G\_15989  
Query: 1 TTGATTTGCAGATGCCTTTT 20  
|||||  
Sbjct: 2937 AACTAAACGTCTACGGAAAA 2918  
>miR5751 Score: 2.5 R03G\_15989  
Query: 1 TTGATTTGCAGATGCCTTTT 20  
\*:|||||:||\*|||  
Sbjct: 2282 TGCTAAACGTCTGCGAAAAA 2263  
>miR5751 Score: 1.8 R03G\_12400  
Query: 1 TTGATTTGCAGATGCCTTTT 20

|||||||\*|||||||\*:  
Sbjct: 720 AACTAAACTTCTACGGAACG 701  
>miR5751 Score: 1.8 R03G\_09146  
Query: 1 TTGATTTGCAGATGCCTTTT 20  
|||||||\*|||||||:  
Sbjct: 201 AACTAAACGATTACGGAAAG 182  
>miR5751 Score: 2.5 R03G\_05579  
Query: 1 TTGATTTGCAGATGCCTTTT 20  
|||||||\*||:||\*|||||||  
Sbjct: 1548 AACTAAAAGTTTAAGGAAAA 1529  
>miR5751 Score: 2.5 R03G\_05085  
Query: 1 TTGATTTGCAGATGCCTT-TT 20  
|||||||\*||:|||||||\*||  
Sbjct: 192 AACTAATTGTTTACGGAACAA 172  
>miR5751 Score: 2.5 R03G\_02776  
Query: 1 TTGATTTGCAGATGCCTTTT 20  
\*|:\*|||||||:|||||||  
Sbjct: 177 CATCAAACGTTTACGGA AAA 158  
>miR530 Score: 2.5 R03G\_05852  
Query: 1 TGATTATGCACCTGGCTCTC 20  
||||:|:|||||||\*|\*||  
Sbjct: 536 ACTAGTGCGTGGACCAAAAAG 517  
>miR6118-5p Score: 1.0 R03G\_14109  
Query: 1 TGGAATGGGTGCTTGGGAAA 20  
|:|||||||\*|  
Sbjct: 84 ATCTTACCCACGAACCCTCT 65  
>miR6118-5p Score: 1.0 R03G\_11276  
Query: 1 TGGAATGGGTGCTTGGGAAA 20  
|||||||:|||||||\*|  
Sbjct: 270 ACCTTATCCACGAACCCTCT 251  
>miR6118-5p Score: 2.5 R03G\_09531  
Query: 1 TGGAATGGGTGCTTGGGA-AA 20  
\*||\*|||||||:|\*||  
Sbjct: 618 TCCGTACCCACGAACCTTATT 598  
>miR6118-5p Score: 0.5 R03G\_04428  
Query: 1 TGGAATGGGTGCTTGGGAAA 20  
|||||||\*|  
Sbjct: 1551 ACCTTACCCACGAACCCTCT 1532  
>miR6118-5p Score: 0.0 R03G\_01147  
Query: 1 TGGAATGGGTGCTTGGGAAA 20  
|||||||  
Sbjct: 231 ACCTTACCCACGAACCCTTT 212  
>miR6118-5p Score: 0.0 R03G\_01161  
Query: 1 TGGAATGGGTGCTTGGGAAA 20  
|||||||



Sbjct: 231 ACCTTACCCACGAACCCTTT 212



```
.....
query 3' CCGGUACGAAUUUUUCUCCCUU 5'
query=miR1160.1, target=R03G_01589, score=0.5, range=234-255, str
target 5' GGUCAUGCUUAAAAAGAGGGAA 3'
.....
query 3' CCGGUACGAAUUUUUCUCCCUU 5'
query=miR1160.1, target=R03G_17249, score=1, range=753-774, stran
target 5' GGCCAUGCUUAAAAAGAGGGGA 3'
.....
query 3' CCGGUACGAAUUUUUCUCCCUU 5'
query=miR1160.1, target=R03G_14363, score=1, range=786-807, stran
target 5' GACCAUGCUUAAAAAGAGGGAA 3'
: .....
query 3' CCGGUACGAAUUUUUCUCCCUU 5'
query=miR1160.1, target=R03G_14547, score=1, range=234-255, stran
target 5' GACCAUGCUUAAAAAGAGGGAA 3'
: .....
query 3' CCGGUACGAAUUUUUCUCCCUU 5'
query=miR1160.1, target=R03G_10734, score=2, range=234-255, stran
target 5' GGCCAUGCUUAAAAAGAUGGAA 3'
.....
query 3' CCGGUACGAAUUUUUCUCCCUU 5'
query=miR1160.1, target=R03G_17459, score=2, range=234-255, stran
target 5' GGCCAUGCUUAAAAAGAUGGAA 3'
.....
query 3' CCGGUACGAAUUUUUCUCCCUU 5'
query=miR1160.1, target=R03G_05134, score=3.5, range=1120-1141,
strand=-1
target 5' UGCCAUCCUAAAAGAGAGGGAG 3'
.....
query 3' CCGGUACGAAUUUUUCUCCCUU 5'
query=miR1160.1, target=R03G_05127, score=3.5, range=1120-1141,
strand=-1
target 5' UGCCAUCCUAAAAGAGAGGGAG 3'
.....
query 3' CCGGUACGAAUUUUUCUCCCUU 5'
query=miR8632, target=R03G_19000, score=0, range=450-468, strand=
target 5' GGUUCCAACUUUGAGCUCU 3'
.....
query 3' CCAAGGUUGAACUCGAGA 5'
query=miR8632, target=R03G_19002, score=0, range=450-468, strand=
target 5' GGUUCCAACUUUGAGCUCU 3'
.....
query 3' CCAAGGUUGAACUCGAGA 5'
query=miR8632, target=R03G_15016, score=3, range=2706-2723, stran
```



target 5' AUGCGCAUCCUUCUUGGCUU 3'  
: :::: ::::::::::::::  
query 3' UCCGUGGAGGAAGAACCGAU 5'  
query=miR3711, target=R03G\_13432, score=4, range=548-567, strand=  
target 5' AGGCAUCAUCUUCUUGGCUG 3'  
: ::::: . ::::::::::::::.  
query 3' UCCGUGGAGGAAGAACCGAU 5'  
query=miR3711, target=R03G\_11375, score=4, range=1394-1413, stran  
target 5' GGGCAUCUGCUUCUUGGUUA 3'  
. ::::: :::::::::::::::  
query 3' UCCGUGGAGGAAGAACCGAU 5'  
query=miR3711, target=R03G\_11895, score=4, range=983-1003, strand  
target 5' AUGCAACUCCUUUUUGGCUG 3'  
: :: :::::::::::::::  
query 3' UCCG-UGGAGGAAGAACCGAU 5'  
query=miR3711, target=R03G\_03385, score=4, range=1172-1192, stran  
target 5' AGGCGUCUUCUUCUUGAGCUA 3'  
: ::::: :::::::::::::::  
query 3' UCCGUGGAGGAAGAAC-CGAU 5'  
query=miR3711, target=R03G\_11900, score=4, range=1400-1420, stran  
target 5' AGGCGGCUCCUUCUUGGCAA 3'  
: :::: . ::::::::::::::: :  
query 3' UCCG-UGGAGGAAGAACCGAU 5'  
query=miR3711, target=R03G\_15319, score=4, range=1145-1165, stran  
target 5' AGUUAUCUCCUUCUUCUUGGCUA 3'  
: :: . ::::::::::::::: ::::::::::  
query 3' UCCGUGGAGGAAG-AACCGAU 5'  
query=miR3711, target=R03G\_04341, score=4, range=643-661, strand=  
target 5' AUGU-CCUCCUUCUUGGUUG 3'  
: :. ::::::::::::::: .  
query 3' UCCGUGGAGGAAGAACCGAU 5'  
query=miR1057, target=R03G\_15507, score=4, range=5822-5841, stran  
target 5' AUCAAUCA-CUAAACCUAGAA 3'  
: :: . ::::::::::::::: :  
query 3' UGGUGGGUCGAUUUGGAUCUU 5'  
query=miR397a, target=R03G\_06442, score=4, range=5174-5194, stran  
target 5' CAUCAUCCUGUAUUCAAUGA 3'  
: ::::: : ::::::::::::::: :  
query 3' GUAGUUGCGACGUGAGUUACU 5'  
query=miR397a, target=R03G\_02691, score=4, range=8006-8026, stran  
target 5' CAUCAUCCUGUAUUCAAUGA 3'  
: ::::: : ::::::::::::::: :  
query 3' GUAGUUGCGACGUGAGUUACU 5'  
query=miR397a, target=R03G\_09965, score=4, range=4517-4537, stran  
target 5' CAUCAUCCUGUAUUCAAUGA 3'

query 3' GUAGUUGCGACGUGAGUUACU 5'  
query=miR397a, target=R03G\_13920, score=4, range=4517-4537, stran  
target 5' CAUCAUCCCUGUAUUCAAUGA 3'

query 3' GUAGUUGCGACGUGAGUUACU 5'  
query=miR397a, target=R03G\_03547, score=4, range=4517-4537, stran  
target 5' CAUCAUCCCUGUAUUCAAUGA 3'

query 3' GUAGUUGCGACGUGAGUUACU 5'  
query=miR397a, target=R03G\_13867, score=4, range=4433-4453, stran  
target 5' CAUCAUCCCUGUAUUCAAUGA 3'

query 3' GUAGUUGCGACGUGAGUUACU 5'  
query=miR397a, target=R03G\_02959, score=4, range=4517-4537, stran  
target 5' CAUCAUCCCUGUAUUCAAUGA 3'

query 3' GUAGUUGCGACGUGAGUUACU 5'  
query=miR397a, target=R03G\_15250, score=4, range=4472-4492, stran  
target 5' CAUCAUCCCUGUAUUCAAUGA 3'

query 3' GUAGUUGCGACGUGAGUUACU 5'  
query=miR397a, target=R03G\_17371, score=4, range=4472-4492, stran  
target 5' CAUCAUCCCUGUAUUCAAUGA 3'

query 3' GUAGUUGCGACGUGAGUUACU 5'  
query=miR397a, target=R03G\_06427, score=4, range=4109-4129, stran  
target 5' CAUCAUCCCUGUAUUCAAUGA 3'

query 3' GUAGUUGCGACGUGAGUUACU 5'  
query=miR397a, target=R03G\_17326, score=4, range=4349-4369, stran  
target 5' CAUCAUCCCUGUAUUCAAUGA 3'

query 3' GUAGUUGCGACGUGAGUUACU 5'  
query=miR397a, target=R03G\_06428, score=4, range=3611-3631, stran  
target 5' CAUCAUCCCUGUAUUCAAUGA 3'

query 3' GUAGUUGCGACGUGAGUUACU 5'  
query=miR397a, target=R03G\_13749, score=4, range=3026-3046, stran  
target 5' CAUCAUCCCUGUAUUCAAUGA 3'

query 3' GUAGUUGCGACGUGAGUUACU 5'  
query=miR397a, target=R03G\_05619, score=4, range=2660-2680, stran  
target 5' CAUCAUCCCUGUAUUCAAUGA 3'









```

::: : :::::::::::::::
query 3' UUUUACGAGUAGAGUUCUUU 5'
query=miR2645, target=R03G_06106, score=4, range=1295-1313, stran
target 5' AUUAUG-UUAUCUCAAGAAA 3'
: ::: :::::::::::::::
query 3' UUUUACGAGUAGAGUUCUUU 5'
query=miR2645, target=R03G_09549, score=4, range=106-124, strand=
target 5' AAAAAG-UCAUCUAAAGAAA 3'
:::: : ::::: :::::
query 3' UUUUACGAGUAGAGUUCUUU 5'
query=miR2645, target=R03G_09863, score=4, range=1198-1216, stran
target 5' AAAAAGUUCAUC-CAAGAAG 3'
:::: ::::: :::::
query 3' UUUUACGAGUAGAGUUCUUU 5'
query=miR2645, target=R03G_06697, score=4, range=274-292, strand=
target 5' AGAAGGUUCAU-UCAAGAAA 3'
:::: ::::: :::::
query 3' UUUUACGAGUAGAGUUCUUU 5'
query=miR2645, target=R03G_05056, score=4, range=593-612, strand=
target 5' AGGCUGCUCAUCACAAGAAA 3'
... ::::: :::::
query 3' UUUUACGAGUAGAGUUCUUU 5'
query=miR2645, target=R03G_11502, score=4, range=175-195, strand=
target 5' AGAGUGCUCUCAUGCUCAAGAAC 3'
::::::::::: :::::
query 3' UUUUACGAGUA-GAGUUCUUU 5'
query=miR3946, target=R03G_17023, score=1, range=1225-1246, stran
target 5' CAUGCUCUCCUCUUUUCUCUACA 3'
::::::::::: :::::
query 3' GUACGAGAGAGAAAAGAGAUGU 5'
query=miR3946, target=R03G_10379, score=3, range=319-340, strand=
target 5' CUUGUUCUUUCUUUUCUUUACA 3'
: ::::::::::::::::::::
query 3' GUACGAGAGAGAAAAGAGAUGU 5'
query=miR3946, target=R03G_02013, score=4, range=1467-1489, stran
target 5' CAUCUUCUUUCUUUUCUUCUACA 3'
::: ::::::::::::::: :::::
query 3' GUACGAGAGAGAAAAG-AGAUGU 5'
query=miR8748, target=R03G_04592, score=0, range=1361-1383, stran
target 5' AUUCAUUAUUAUCAUCACCAUCA 3'
::::::::::: :::::
query 3' UAAGUAAUAAUAGUAGUGGUAGU 5'
query=miR8748, target=R03G_10217, score=1, range=2189-2211, stran
target 5' AUUCAUUAUCAUCAUCACCAUCA 3'
::::::::::: :::::

```









```

::: :::::::::::::::
query 3' AGCGCAGAAGGUCAAGGGGU 5'
query=miR5769, target=R03G_15707, score=3, range=472-492, strand=
target 5' UCGACGACUUCAGUUCUCCA 3'
::: :: :::::::::::::::
query 3' AGC-GCAGAAGGUCAAGGGGU 5'
query=miR5769, target=R03G_05115, score=3.5, range=492-510, stran
target 5' UUG-GUCUUCAGUUCUUA 3'
::: :::::::::::::::
query 3' AGCGCAGAAGGUCAAGGGGU 5'
query=miR5769, target=R03G_09242, score=4, range=351-369, strand=
target 5' UCGC-ACUUUCAGUUCUUU 3'
:::: :::::::::::::::
query 3' AGCGCAGAAGGUCAAGGGGU 5'
query=miR5769, target=R03G_09290, score=4, range=903-922, strand=
target 5' UAGCGGCUUCUAGUUCUCA 3'
: ::: :::::::::::::::
query 3' AGCGCAGAAGGUCAAGGGGU 5'
query=miR5769, target=R03G_03922, score=4, range=472-492, strand=
target 5' GCGACGACUUCAGUUCUCCA 3'
:: :: :::::::::::::::
query 3' AGC-GCAGAAGGUCAAGGGGU 5'
query=miR827, target=R03G_16161, score=3, range=675-694, strand=1
target 5' AUUUAAUGAUGGUCAUUUAA 3'
:::: :::::::::::::::
query 3' UAAACAACUACCAGUAGAUU 5'
query=miR827, target=R03G_15356, score=4, range=687-706, strand=1
target 5' AUUUGGUGGUUGUCAUCUAA 3'
::::: ::: :::::::::::::::
query 3' UAAACAACUACCAGUAGAUU 5'
query=miR827, target=R03G_00714, score=4, range=616-635, strand=-
target 5' AUUUGUUGAUGGUUUUUUAA 3'
::::::::::: . :::
query 3' UAAACAACUACCAGUAGAUU 5'
query=miR827, target=R03G_16787, score=4, range=2140-2160, strand
target 5' CCUUGUUGAUGGUUCAUCUAA 3'
::::::::::: :::::::::::
query 3' UAAACAACUACC-AGUAGAUU 5'
query=miR171a-3p, target=R03G_16852, score=4, range=398-416, stra
target 5' AUUUUUUCG-GGCUCAAUCA 3'
::::: :: :::::::::::::::
query 3' UAUAAACCGCGCCGAGUUAGU 5'
query=miR8123-3p, target=R03G_16904, score=0, range=483-503, stra
target 5' GACUUGGACCAAUGGCGACAA 3'
::::::::::: :::::::::::

```

query 3' CUGAACCUGGUUACCGCUGUU 5'  
query=miR8123-3p, target=R03G\_16829, score=0, range=483-503, stra  
target 5' GACUUGGACCAAUGGCGACAA 3'  
.....  
query 3' CUGAACCUGGUUACCGCUGUU 5'  
query=miR8123-3p, target=R03G\_16428, score=0, range=120-140, stra  
target 5' GACUUGGACCAAUGGCGACAA 3'  
.....  
query 3' CUGAACCUGGUUACCGCUGUU 5'  
query=miR8123-3p, target=R03G\_16721, score=1, range=441-461, stra  
target 5' GACUUGGACCAAUGGCGAUAA 3'  
.....  
query 3' CUGAACCUGGUUACCGCUGUU 5'  
query=miR8123-3p, target=R03G\_11411, score=1, range=120-140, stra  
target 5' GACUUGGACCAAUGGCGAUAA 3'  
.....  
query 3' CUGAACCUGGUUACCGCUGUU 5'  
query=miR8123-3p, target=R03G\_05945, score=1, range=120-140, stra  
target 5' GACUUGGACCAAUGGCGAUAA 3'  
.....  
query 3' CUGAACCUGGUUACCGCUGUU 5'  
query=miR8123-3p, target=R03G\_16703, score=1.5, range=483-503,  
strand=1  
target 5' GGCUUGGACCAAUGGCGAUAA 3'  
.....  
query 3' CUGAACCUGGUUACCGCUGUU 5'  
query=miR8123-3p, target=R03G\_13734, score=2, range=483-503, stra  
target 5' GACUUGGACUAAUGGCGAUAA 3'  
.....  
query 3' CUGAACCUGGUUACCGCUGUU 5'  
query=miR8123-3p, target=R03G\_17154, score=2, range=120-140, stra  
target 5' GACUUGGACUAAUGGCGAUAA 3'  
.....  
query 3' CUGAACCUGGUUACCGCUGUU 5'  
query=miR8123-3p, target=R03G\_02224, score=2, range=120-140, stra  
target 5' GACUUGGACUAAUGGCGAUAA 3'  
.....  
query 3' CUGAACCUGGUUACCGCUGUU 5'  
query=miR8123-3p, target=R03G\_12060, score=2, range=120-140, stra  
target 5' GACUUGGACUAAUGGCGAUAA 3'  
.....  
query 3' CUGAACCUGGUUACCGCUGUU 5'  
query=miR8123-3p, target=R03G\_17202, score=3, range=483-503, stra  
target 5' GACUUGGACCAAUGGCAAUAA 3'  
..... :.::





query 3' UAGAUUCUAGUCGUACGUU 5'  
query=miR7823, target=R03G\_07541, score=4, range=210-228, strand=  
target 5' AUCCAAGGUCAGCAAGCAA 3'  
::: :::::::::::::: ::::

query 3' UAGAUUCUAGUCGUACGUU 5'  
query=miR7823, target=R03G\_00264, score=4, range=378-396, strand=  
target 5' AUCCAAGGUCAGCAAGCAA 3'  
::: :::::::::::::: ::::

query 3' UAGAUUCUAGUCGUACGUU 5'  
query=miR7823, target=R03G\_06546, score=4, range=207-225, strand=  
target 5' ACCUAAGGUCAGCAAGCAA 3'  
: :::::::::::::: ::::

query 3' UAGAUUCUAGUCGUACGUU 5'  
query=miR7823, target=R03G\_04372, score=4, range=648-666, strand=  
target 5' CUCUACGAUCAACAUGCAA 3'  
:::: :::::: ::::::::::

query 3' UAGAUUCUAGUCGUACGUU 5'  
query=miR7823, target=R03G\_05963, score=4, range=2524-2542, stran  
target 5' AGCUAUGAACAGCAUGCAA 3'  
: ::: :: ::::::::::::::

query 3' UAGAUUCUAGUCGUACGUU 5'  
query=miR7823, target=R03G\_08106, score=4, range=2458-2476, stran  
target 5' AGCUAUGAACAGCAUGCAA 3'  
: ::: :: ::::::::::::::

query 3' UAGAUUCUAGUCGUACGUU 5'  
query=miR7823, target=R03G\_17163, score=4, range=2338-2356, stran  
target 5' AGCUAUGAACAGCAUGCAA 3'  
: ::: :: ::::::::::::::

query 3' UAGAUUCUAGUCGUACGUU 5'  
query=miR7823, target=R03G\_15896, score=4, range=2524-2542, stran  
target 5' AGCUAUGAACAGCAUGCAA 3'  
: ::: :: ::::::::::::::

query 3' UAGAUUCUAGUCGUACGUU 5'  
query=miR7823, target=R03G\_02711, score=4, range=2458-2476, stran  
target 5' AACUAUGAACAGCAUGCAA 3'  
: ::: :: ::::::::::::::

query 3' UAGAUUCUAGUCGUACGUU 5'  
query=miR7823, target=R03G\_14242, score=4, range=622-640, strand=  
target 5' AUCCAUGAUCAGCAUGCUA 3'  
::: : :::::::::::::: :

query 3' UAGAUUCUAGUCGUACGUU 5'  
query=miR7823, target=R03G\_11906, score=4, range=170-189, strand=  
target 5' AUCUAAGUAUCAGCAUGCGC 3'  
::::: ::::::::::::::.

query 3' UAGAUUC-UAGUCGUACGUU 5'



query=miR7495a, target=R03G\_11567, score=4, range=1613-1632, strand  
target 5' UGAAGGUGGCUCUACGAGAA 3'  
:::::: ::: ::::::::::

query 3' ACUUCCUCCGUGAUGUUCUU 5'  
query=miR7495a, target=R03G\_11486, score=4, range=665-684, strand  
target 5' UGAAGGUGGCUCUACGAGAA 3'  
:::::: ::: ::::::::::

query 3' ACUUCCUCCGUGAUGUUCUU 5'  
query=miR7495a, target=R03G\_02354, score=4, range=956-975, strand  
target 5' UGAAGGUGGCUCUACGAGAA 3'  
:::::: ::: ::::::::::

query 3' ACUUCCUCCGUGAUGUUCUU 5'  
query=miR7495a, target=R03G\_08906, score=4, range=956-975, strand  
target 5' UGAAGGUGGCUCUACGAGAA 3'  
:::::: ::: ::::::::::

query 3' ACUUCCUCCGUGAUGUUCUU 5'  
query=miR7495a, target=R03G\_05303, score=4, range=956-975, strand  
target 5' UGAAGGUGGCUCUACGAGAA 3'  
:::::: ::: ::::::::::

query 3' ACUUCCUCCGUGAUGUUCUU 5'  
query=miR7495a, target=R03G\_13903, score=4, range=956-975, strand  
target 5' UGAAGGUGGCUCUACGAGAA 3'  
:::::: ::: ::::::::::

query 3' ACUUCCUCCGUGAUGUUCUU 5'  
query=miR7495a, target=R03G\_13672, score=4, range=956-975, strand  
target 5' UGAAGGUGGCUCUACGAGAA 3'  
:::::: ::: ::::::::::

query 3' ACUUCCUCCGUGAUGUUCUU 5'  
query=miR7495a, target=R03G\_14722, score=4, range=956-975, strand  
target 5' UGAAGGUGGCUCUACGAGAA 3'  
:::::: ::: ::::::::::

query 3' ACUUCCUCCGUGAUGUUCUU 5'  
query=miR7495a, target=R03G\_13664, score=4, range=956-975, strand  
target 5' UGAAGGUGGCUCUACGAGAA 3'  
:::::: ::: ::::::::::

query 3' ACUUCCUCCGUGAUGUUCUU 5'  
query=miR7495a, target=R03G\_05181, score=4, range=956-975, strand  
target 5' UGAAGGUGGCUCUACGAGAA 3'  
:::::: ::: ::::::::::

query 3' ACUUCCUCCGUGAUGUUCUU 5'  
query=miR7495a, target=R03G\_05194, score=4, range=956-975, strand  
target 5' UGAAGGUGGCUCUACGAGAA 3'  
:::::: ::: ::::::::::

query 3' ACUUCCUCCGUGAUGUUCUU 5'  
query=miR7495a, target=R03G\_01528, score=4, range=524-543, strand



query 3' AUGAGUGUCUUUGUUUGUUAUGU 5'  
query=miR9742, target=R03G\_02691, score=0, range=6186-6208, stran  
target 5' UACUCACAGAAACAAACAAUACA 3'

query 3' AUGAGUGUCUUUGUUUGUUAUGU 5'  
query=miR9742, target=R03G\_09965, score=0, range=2697-2719, stran  
target 5' UACUCACAGAAACAAACAAUACA 3'

query 3' AUGAGUGUCUUUGUUUGUUAUGU 5'  
query=miR9742, target=R03G\_13920, score=0, range=2697-2719, stran  
target 5' UACUCACAGAAACAAACAAUACA 3'

query 3' AUGAGUGUCUUUGUUUGUUAUGU 5'  
query=miR9742, target=R03G\_03547, score=0, range=2697-2719, stran  
target 5' UACUCACAGAAACAAACAAUACA 3'

query 3' AUGAGUGUCUUUGUUUGUUAUGU 5'  
query=miR9742, target=R03G\_13867, score=0, range=2613-2635, stran  
target 5' UACUCACAGAAACAAACAAUACA 3'

query 3' AUGAGUGUCUUUGUUUGUUAUGU 5'  
query=miR9742, target=R03G\_02959, score=0, range=2697-2719, stran  
target 5' UACUCACAGAAACAAACAAUACA 3'

query 3' AUGAGUGUCUUUGUUUGUUAUGU 5'  
query=miR9742, target=R03G\_15250, score=0, range=2652-2674, stran  
target 5' UACUCACAGAAACAAACAAUACA 3'

query 3' AUGAGUGUCUUUGUUUGUUAUGU 5'  
query=miR9742, target=R03G\_17371, score=0, range=2652-2674, stran  
target 5' UACUCACAGAAACAAACAAUACA 3'

query 3' AUGAGUGUCUUUGUUUGUUAUGU 5'  
query=miR9742, target=R03G\_06427, score=0, range=2289-2311, stran  
target 5' UACUCACAGAAACAAACAAUACA 3'

query 3' AUGAGUGUCUUUGUUUGUUAUGU 5'  
query=miR9742, target=R03G\_17326, score=0, range=2529-2551, stran  
target 5' UACUCACAGAAACAAACAAUACA 3'

query 3' AUGAGUGUCUUUGUUUGUUAUGU 5'  
query=miR9742, target=R03G\_06428, score=0, range=1791-1813, stran  
target 5' UACUCACAGAAACAAACAAUACA 3'

query 3' AUGAGUGUCUUUGUUUGUUAUGU 5'  
query=miR9742, target=R03G\_13749, score=0, range=1260-1282, stran  
target 5' UACUCACAGAAACAAACAAUACA 3'  
.....  
query 3' AUGAGUGUCUUUGUUUGUUAUGU 5'  
query=miR9742, target=R03G\_05619, score=0, range=840-862, strand=  
target 5' UACUCACAGAAACAAACAAUACA 3'  
.....  
query 3' AUGAGUGUCUUUGUUUGUUAUGU 5'  
query=miR9742, target=R03G\_14355, score=0, range=903-925, strand=  
target 5' UACUCACAGAAACAAACAAUACA 3'  
.....  
query 3' AUGAGUGUCUUUGUUUGUUAUGU 5'  
query=miR9742, target=R03G\_15585, score=0, range=2652-2674, stran  
target 5' UACUCACAGAAACAAACAAUACA 3'  
.....  
query 3' AUGAGUGUCUUUGUUUGUUAUGU 5'  
query=miR9742, target=R03G\_04114, score=0, range=2697-2719, stran  
target 5' UACUCACAGAAACAAACAAUACA 3'  
.....  
query 3' AUGAGUGUCUUUGUUUGUUAUGU 5'  
query=miR9742, target=R03G\_02221, score=0, range=2619-2641, stran  
target 5' UACUCACAGAAACAAACAAUACA 3'  
.....  
query 3' AUGAGUGUCUUUGUUUGUUAUGU 5'  
query=miR9742, target=R03G\_05272, score=0, range=2697-2719, stran  
target 5' UACUCACAGAAACAAACAAUACA 3'  
.....  
query 3' AUGAGUGUCUUUGUUUGUUAUGU 5'  
query=miR9742, target=R03G\_01613, score=0, range=948-970, strand=  
target 5' UACUCACAGAAACAAACAAUACA 3'  
.....  
query 3' AUGAGUGUCUUUGUUUGUUAUGU 5'  
query=miR9742, target=R03G\_00306, score=0, range=1146-1168, stran  
target 5' UACUCACAGAAACAAACAAUACA 3'  
.....  
query 3' AUGAGUGUCUUUGUUUGUUAUGU 5'  
query=miR9742, target=R03G\_10558, score=0, range=450-472, strand=  
target 5' UACUCACAGAAACAAACAAUACA 3'  
.....  
query 3' AUGAGUGUCUUUGUUUGUUAUGU 5'  
query=miR9742, target=R03G\_05368, score=3, range=1917-1939, stran  
target 5' UAAUAACAUAACAAACAAUACA 3'  
:: : :: : .....

query=miR9742, target=R03G\_02099, score=4, range=1832-1855, stran  
target 5' UACCUGACAGAAAUAGCAAUACA 3'  
:: :: :::::::::::::::::::::  
query 3' AU-GAGUGUCUUUGUUUGUUAUGU 5'  
query=miR823, target=R03G\_15228, score=0, range=138-157, strand=1  
target 5' AUCUUCAUUUGAUCACCACA 3'  
:::::::::::::::::::  
query 3' UAGAAGUAAACUAGUGGUGU 5'  
query=miR823, target=R03G\_02750, score=3, range=1018-1036, strand  
target 5' AUCUU-AUUUGAUCACCAAA 3'  
::::: :::::::::::::: ::  
query 3' UAGAAGUAAACUAGUGGUGU 5'  
query=miR823, target=R03G\_06586, score=3, range=250-270, strand=-  
target 5' AUCUUCAGUUUGAUCAUCACC 3'  
:::::::::: :::::::::::::::  
query 3' UAGAAGU-AAACUAGUGGUGU 5'  
query=miR823, target=R03G\_16990, score=3, range=970-989, strand=-  
target 5' ACCUUCUUUUGAUCACCACU 3'  
: :::: :::::::::::::::  
query 3' UAGAAGUAAACUAGUGGUGU 5'  
query=miR823, target=R03G\_12691, score=3.5, range=354-373, strand  
target 5' GUCUUCAUUCGAUCACCAUA 3'  
.:::::::::: :::::::::::::::  
query 3' UAGAAGUAAACUAGUGGUGU 5'  
query=miR823, target=R03G\_01418, score=3.5, range=235-253, strand  
target 5' AUC-UCGUUUGAUCAUCAUA 3'  
::: :::::::::::::::::::::  
query 3' UAGAAGUAAACUAGUGGUGU 5'  
query=miR823, target=R03G\_14897, score=3.5, range=138-157, strand  
target 5' AGCAUCGUUUGAUCACCGCA 3'  
: : :::::::::::::::::::::  
query 3' UAGAAGUAAACUAGUGGUGU 5'  
query=miR823, target=R03G\_08367, score=3.5, range=6352-6370, stra  
target 5' GCCUUC-UUUGAUCAUCACA 3'  
. ::::: :::::::::::::::::::::  
query 3' UAGAAGUAAACUAGUGGUGU 5'  
query=miR823, target=R03G\_06012, score=3.5, range=636-654, strand  
target 5' GUCUUC-UUUGAUUGCCACA 3'  
.:::::::::: :::::::::::::::::::::  
query 3' UAGAAGUAAACUAGUGGUGU 5'  
query=miR823, target=R03G\_06365, score=4, range=350-370, strand=1  
target 5' AUUUCUCGUUUGGUCACUACA 3'  
::: : :::::::::::::::::::::  
query 3' UAGA-AGUAAACUAGUGGUGU 5'  
query=miR823, target=R03G\_13123, score=4, range=1653-1672, strand







query 3' ACCAGAGAAGGUUCCAAAUUGU 5'  
query=miR4348c, target=R03G\_14347, score=4, range=875-896, strand  
target 5' UGAUCUCGACCAAGGUUUAGCA 3'  
:: :::: ::::::::::::::

query 3' ACCAGAGAAGGUUCCAAAUUGU 5'  
query=miR4348c, target=R03G\_09547, score=4, range=875-896, strand  
target 5' UGAUCUCGACCAAGGUUUAGCA 3'  
:: :::: ::::::::::::::

query 3' ACCAGAGAAGGUUCCAAAUUGU 5'  
query=miR4348c, target=R03G\_06425, score=4, range=875-896, strand  
target 5' UGAUCUCGACCAAGGUUUAGCA 3'  
:: :::: ::::::::::::::

query 3' ACCAGAGAAGGUUCCAAAUUGU 5'  
query=miR4348c, target=R03G\_17021, score=4, range=875-896, strand  
target 5' UGAUCUCGACCAAGGUUUAGCA 3'  
:: :::: ::::::::::::::

query 3' ACCAGAGAAGGUUCCAAAUUGU 5'  
query=miR4348c, target=R03G\_12677, score=4, range=875-896, strand  
target 5' UGAUCUCGACCAAGGUUUAGCA 3'  
:: :::: ::::::::::::::

query 3' ACCAGAGAAGGUUCCAAAUUGU 5'  
query=miR4348c, target=R03G\_04933, score=4, range=875-896, strand  
target 5' UGAUCUCGACCAAGGUUUAGCA 3'  
:: :::: ::::::::::::::

query 3' ACCAGAGAAGGUUCCAAAUUGU 5'  
query=miR4348c, target=R03G\_05330, score=4, range=875-896, strand  
target 5' UGAUCUCGACCAAGGUUUAGCA 3'  
:: :::: ::::::::::::::

query 3' ACCAGAGAAGGUUCCAAAUUGU 5'  
query=miR4348c, target=R03G\_02704, score=4, range=875-896, strand  
target 5' UGAUCUCGACCAAGGUUUAGCA 3'  
:: :::: ::::::::::::::

query 3' ACCAGAGAAGGUUCCAAAUUGU 5'  
query=miR4348c, target=R03G\_05344, score=4, range=875-896, strand  
target 5' UGAUCUCGACCAAGGUUUAGCA 3'  
:: :::: ::::::::::::::

query 3' ACCAGAGAAGGUUCCAAAUUGU 5'  
query=miR1870-5p, target=R03G\_15268, score=0, range=1663-1684,  
strand=1  
target 5' AUGCCACUGGUCCAUUCAGCAA 3'  
::::::::::::::::::::

query 3' UACGGUGACCAGGUAAGUCGUU 5'  
query=miR1870-5p, target=R03G\_04121, score=0, range=1663-1684,  
strand=1  
target 5' AUGCCACUGGUCCAUUCAGCAA 3'

query 3' UACGGUGACCAGGUAAGUCGUU 5'  
query=miR1870-5p, target=R03G\_13217, score=0, range=1663-1684,  
strand=1  
target 5' AUGCCACUGGUCCAUUCAGCAA 3'

query 3' UACGGUGACCAGGUAAGUCGUU 5'  
query=miR1870-5p, target=R03G\_15265, score=0, range=1663-1684,  
strand=1  
target 5' AUGCCACUGGUCCAUUCAGCAA 3'

query 3' UACGGUGACCAGGUAAGUCGUU 5'  
query=miR1870-5p, target=R03G\_14352, score=0, range=1663-1684,  
strand=1  
target 5' AUGCCACUGGUCCAUUCAGCAA 3'

query 3' UACGGUGACCAGGUAAGUCGUU 5'  
query=miR1870-5p, target=R03G\_13222, score=0, range=1657-1678,  
strand=1  
target 5' AUGCCACUGGUCCAUUCAGCAA 3'

query 3' UACGGUGACCAGGUAAGUCGUU 5'  
query=miR1870-5p, target=R03G\_13219, score=0, range=1663-1684,  
strand=1  
target 5' AUGCCACUGGUCCAUUCAGCAA 3'

query 3' UACGGUGACCAGGUAAGUCGUU 5'  
query=miR1870-5p, target=R03G\_16818, score=0, range=1405-1426,  
strand=1  
target 5' AUGCCACUGGUCCAUUCAGCAA 3'

query 3' UACGGUGACCAGGUAAGUCGUU 5'  
query=miR1870-5p, target=R03G\_05640, score=0, range=1411-1432,  
strand=1  
target 5' AUGCCACUGGUCCAUUCAGCAA 3'

query 3' UACGGUGACCAGGUAAGUCGUU 5'  
query=miR1870-5p, target=R03G\_15266, score=0, range=1663-1684,  
strand=1  
target 5' AUGCCACUGGUCCAUUCAGCAA 3'

query 3' UACGGUGACCAGGUAAGUCGUU 5'  
query=miR1870-5p, target=R03G\_03992, score=0, range=394-415, str  
target 5' AUGCCACUGGUCCAUUCAGCAA 3'



target 5' UUCAUUGUCGGCUACAGUG 3'  
: :: :.....  
query 3' ACGGAAACAGCCGAUGUCAU 5'  
query=miR2905, target=R03G\_11026, score=3.5, range=657-676, stran  
target 5' UGCUUUUGUUGGCUAUGGUA 3'  
:.....  
query 3' ACGGAAACAGCCGAUGUCAU 5'  
query=miR5557-3p, target=R03G\_14978, score=0, range=111-130, stra  
target 5' UCAACAAGAUAAUGCAAGCA 3'  
:.....  
query 3' AGUUGUUCUAUUACGUUCGU 5'  
query=miR5557-3p, target=R03G\_17249, score=0, range=630-649, stra  
target 5' UCAACAAGAUAAUGCAAGCA 3'  
:.....  
query 3' AGUUGUUCUAUUACGUUCGU 5'  
query=miR5557-3p, target=R03G\_11527, score=0, range=111-130, stra  
target 5' UCAACAAGAUAAUGCAAGCA 3'  
:.....  
query 3' AGUUGUUCUAUUACGUUCGU 5'  
query=miR5557-3p, target=R03G\_10774, score=0, range=672-691, stra  
target 5' UCAACAAGAUAAUGCAAGCA 3'  
:.....  
query 3' AGUUGUUCUAUUACGUUCGU 5'  
query=miR5557-3p, target=R03G\_13270, score=0, range=705-724, stra  
target 5' UCAACAAGAUAAUGCAAGCA 3'  
:.....  
query 3' AGUUGUUCUAUUACGUUCGU 5'  
query=miR5557-3p, target=R03G\_17276, score=0, range=795-814, stra  
target 5' UCAACAAGAUAAUGCAAGCA 3'  
:.....  
query 3' AGUUGUUCUAUUACGUUCGU 5'  
query=miR5557-3p, target=R03G\_03626, score=0, range=111-130, stra  
target 5' UCAACAAGAUAAUGCAAGCA 3'  
:.....  
query 3' AGUUGUUCUAUUACGUUCGU 5'  
query=miR5557-3p, target=R03G\_05935, score=0, range=111-130, stra  
target 5' UCAACAAGAUAAUGCAAGCA 3'  
:.....  
query 3' AGUUGUUCUAUUACGUUCGU 5'  
query=miR5557-3p, target=R03G\_01589, score=0, range=111-130, stra  
target 5' UCAACAAGAUAAUGCAAGCA 3'  
:.....  
query 3' AGUUGUUCUAUUACGUUCGU 5'  
query=miR5557-3p, target=R03G\_14547, score=0, range=111-130, stra  
target 5' UCAACAAGAUAAUGCAAGCA 3'

query 3' AGUUGUUCUAUUACGUUCGU 5'  
query=miR5557-3p, target=R03G\_00678, score=0, range=75-94, strand  
target 5' UCAACAAGAUAAUGCAAGCA 3'

query 3' AGUUGUUCUAUUACGUUCGU 5'  
query=miR5557-3p, target=R03G\_04790, score=0, range=111-130, strand  
target 5' UCAACAAGAUAAUGCAAGCA 3'

query 3' AGUUGUUCUAUUACGUUCGU 5'  
query=miR5557-3p, target=R03G\_13863, score=0, range=405-424, strand  
target 5' UCAACAAGAUAAUGCAAGCA 3'

query 3' AGUUGUUCUAUUACGUUCGU 5'  
query=miR5557-3p, target=R03G\_14363, score=0, range=663-682, strand  
target 5' UCAACAAGAUAAUGCAAGCA 3'

query 3' AGUUGUUCUAUUACGUUCGU 5'  
query=miR5557-3p, target=R03G\_10869, score=1, range=111-130, strand  
target 5' UCAACAUGAUAAUGCAAGCA 3'

query 3' AGUUGUUCUAUUACGUUCGU 5'  
query=miR5557-3p, target=R03G\_03593, score=2, range=111-130, strand  
target 5' UCAACAAGAUAGUGCAGGCA 3'

query 3' AGUUGUUCUAUUACGUUCGU 5'  
query=miR5557-3p, target=R03G\_17259, score=2, range=111-130, strand  
target 5' UCAACAAGAUAAUGAAAGCA 3'

query 3' AGUUGUUCUAUUACGUUCGU 5'  
query=miR5557-3p, target=R03G\_13921, score=2, range=111-130, strand  
target 5' UCAACAAGAUAAUGGAAGCA 3'

query 3' AGUUGUUCUAUUACGUUCGU 5'  
query=miR5557-3p, target=R03G\_10734, score=2, range=111-130, strand  
target 5' UCAACAACAUAUAAUGCAAGCA 3'

query 3' AGUUGUUCUAUUACGUUCGU 5'  
query=miR5557-3p, target=R03G\_17459, score=2, range=111-130, strand  
target 5' UCAACAACAUAUAAUGCAAGCA 3'

query 3' AGUUGUUCUAUUACGUUCGU 5'  
query=miR5557-3p, target=R03G\_05423, score=2, range=111-130, strand  
target 5' UCAACUAGAUAAUGUAAGCA 3'







query 3' AAGUCCAUCUCCUGUACGU 5'  
query=miR5232, target=R03G\_05271, score=0, range=2031-2049, stran  
target 5' UUCAGGUAGAGGACAUGCA 3'

query 3' AAGUCCAUCUCCUGUACGU 5'  
query=miR5232, target=R03G\_03098, score=0, range=1239-1257, stran  
target 5' UUCAGGUAGAGGACAUGCA 3'

query 3' AAGUCCAUCUCCUGUACGU 5'  
query=miR5232, target=R03G\_00290, score=0, range=2031-2049, stran  
target 5' UUCAGGUAGAGGACAUGCA 3'

query 3' AAGUCCAUCUCCUGUACGU 5'  
query=miR5232, target=R03G\_02703, score=0, range=198-216, strand=  
target 5' UUCAGGUAGAGGACAUGCA 3'

query 3' AAGUCCAUCUCCUGUACGU 5'  
query=miR5232, target=R03G\_06442, score=0, range=7755-7773, stran  
target 5' UUCAGGUAGAGGACAUGCA 3'

query 3' AAGUCCAUCUCCUGUACGU 5'  
query=miR5232, target=R03G\_12470, score=0, range=2031-2049, stran  
target 5' UUCAGGUAGAGGACAUGCA 3'

query 3' AAGUCCAUCUCCUGUACGU 5'  
query=miR5232, target=R03G\_14995, score=0, range=2031-2049, stran  
target 5' UUCAGGUAGAGGACAUGCA 3'

query 3' AAGUCCAUCUCCUGUACGU 5'  
query=miR5232, target=R03G\_17438, score=0, range=1563-1581, stran  
target 5' UUCAGGUAGAGGACAUGCA 3'

query 3' AAGUCCAUCUCCUGUACGU 5'  
query=miR5232, target=R03G\_11524, score=0, range=1098-1116, stran  
target 5' UUCAGGUAGAGGACAUGCA 3'

query 3' AAGUCCAUCUCCUGUACGU 5'  
query=miR5232, target=R03G\_07098, score=0, range=2031-2049, stran  
target 5' UUCAGGUAGAGGACAUGCA 3'

query 3' AAGUCCAUCUCCUGUACGU 5'  
query=miR5232, target=R03G\_16557, score=0, range=2031-2049, stran  
target 5' UUCAGGUAGAGGACAUGCA 3'



query=miR9491, target=R03G\_01718, score=0, range=278-298, strand=  
target 5' CUGAGUCAGAGGAAGAUAGCA 3'  
::::::::::::::::::::::::::  
query 3' GACUCAGUCUCCUUCUAUCGU 5'  
query=miR9491, target=R03G\_15869, score=0, range=278-298, strand=  
target 5' CUGAGUCAGAGGAAGAUAGCA 3'  
::::::::::::::::::::::::::  
query 3' GACUCAGUCUCCUUCUAUCGU 5'  
query=miR9491, target=R03G\_10560, score=0, range=278-298, strand=  
target 5' CUGAGUCAGAGGAAGAUAGCA 3'  
::::::::::::::::::::::::::  
query 3' GACUCAGUCUCCUUCUAUCGU 5'  
query=miR9491, target=R03G\_11275, score=0, range=278-298, strand=  
target 5' CUGAGUCAGAGGAAGAUAGCA 3'  
::::::::::::::::::::::::::  
query 3' GACUCAGUCUCCUUCUAUCGU 5'  
query=miR9491, target=R03G\_14704, score=0, range=278-298, strand=  
target 5' CUGAGUCAGAGGAAGAUAGCA 3'  
::::::::::::::::::::::::::  
query 3' GACUCAGUCUCCUUCUAUCGU 5'  
query=miR9491, target=R03G\_12979, score=0, range=278-298, strand=  
target 5' CUGAGUCAGAGGAAGAUAGCA 3'  
::::::::::::::::::::::::::  
query 3' GACUCAGUCUCCUUCUAUCGU 5'  
query=miR9491, target=R03G\_10555, score=0, range=278-298, strand=  
target 5' CUGAGUCAGAGGAAGAUAGCA 3'  
::::::::::::::::::::::::::  
query 3' GACUCAGUCUCCUUCUAUCGU 5'  
query=miR9491, target=R03G\_05280, score=0, range=278-298, strand=  
target 5' CUGAGUCAGAGGAAGAUAGCA 3'  
::::::::::::::::::::::::::  
query 3' GACUCAGUCUCCUUCUAUCGU 5'  
query=miR9491, target=R03G\_16686, score=0, range=278-298, strand=  
target 5' CUGAGUCAGAGGAAGAUAGCA 3'  
::::::::::::::::::::::::::  
query 3' GACUCAGUCUCCUUCUAUCGU 5'  
query=miR9491, target=R03G\_07305, score=0, range=278-298, strand=  
target 5' CUGAGUCAGAGGAAGAUAGCA 3'  
::::::::::::::::::::::::::  
query 3' GACUCAGUCUCCUUCUAUCGU 5'  
query=miR9491, target=R03G\_03103, score=0, range=278-298, strand=  
target 5' CUGAGUCAGAGGAAGAUAGCA 3'  
::::::::::::::::::::::::::  
query 3' GACUCAGUCUCCUUCUAUCGU 5'  
query=miR9491, target=R03G\_12087, score=0, range=278-298, strand=



query 3' GACUCAGUCUCCUUCUAUCGU 5'  
query=miR9491, target=R03G\_08632, score=3, range=503-523, strand=  
target 5' GUGAAUCAGAGGAAGAUAGCU 3'  
query 3' GACUCAGUCUCCUUCUAUCGU 5'  
query=miR9491, target=R03G\_12301, score=3.5, range=3578-3598, str  
target 5' UUGACUUGGAGGAAGAUAGUA 3'  
query 3' GACUCAGUCUCCUUCUAUCGU 5'  
query=miR1068, target=R03G\_06442, score=0, range=6121-6142, stran  
target 5' GACCUGCAAGCAAAAACUGGCUA 3'  
query 3' CUGGACGUUCGUUUUGACCGAU 5'  
query=miR1068, target=R03G\_16557, score=0, range=397-418, strand=  
target 5' GACCUGCAAGCAAAAACUGGCUA 3'  
query 3' CUGGACGUUCGUUUUGACCGAU 5'  
query=miR1068, target=R03G\_07098, score=0, range=397-418, strand=  
target 5' GACCUGCAAGCAAAAACUGGCUA 3'  
query 3' CUGGACGUUCGUUUUGACCGAU 5'  
query=miR1068, target=R03G\_01745, score=0, range=397-418, strand=  
target 5' GACCUGCAAGCAAAAACUGGCUA 3'  
query 3' CUGGACGUUCGUUUUGACCGAU 5'  
query=miR1068, target=R03G\_05271, score=0, range=397-418, strand=  
target 5' GACCUGCAAGCAAAAACUGGCUA 3'  
query 3' CUGGACGUUCGUUUUGACCGAU 5'  
query=miR1068, target=R03G\_00290, score=0, range=397-418, strand=  
target 5' GACCUGCAAGCAAAAACUGGCUA 3'  
query 3' CUGGACGUUCGUUUUGACCGAU 5'  
query=miR1068, target=R03G\_15134, score=0, range=439-460, strand=  
target 5' GACCUGCAAGCAAAAACUGGCUA 3'  
query 3' CUGGACGUUCGUUUUGACCGAU 5'  
query=miR1068, target=R03G\_12470, score=0, range=397-418, strand=  
target 5' GACCUGCAAGCAAAAACUGGCUA 3'  
query 3' CUGGACGUUCGUUUUGACCGAU 5'  
query=miR1068, target=R03G\_16132, score=0, range=397-418, strand=  
target 5' GACCUGCAAGCAAAAACUGGCUA 3'

query 3' CUGGACGUUCGUUUUGACCGAU 5'  
query=miR1068, target=R03G\_01928, score=0, range=397-418, strand=  
target 5' GACCUGCAAGCAAAACUGGCUA 3'  
.....  
query 3' CUGGACGUUCGUUUUGACCGAU 5'  
query=miR1068, target=R03G\_11525, score=0, range=397-418, strand=  
target 5' GACCUGCAAGCAAAACUGGCUA 3'  
.....  
query 3' CUGGACGUUCGUUUUGACCGAU 5'  
query=miR1068, target=R03G\_00485, score=0, range=397-418, strand=  
target 5' GACCUGCAAGCAAAACUGGCUA 3'  
.....  
query 3' CUGGACGUUCGUUUUGACCGAU 5'  
query=miR1068, target=R03G\_09479, score=0, range=397-418, strand=  
target 5' GACCUGCAAGCAAAACUGGCUA 3'  
.....  
query 3' CUGGACGUUCGUUUUGACCGAU 5'  
query=miR1068, target=R03G\_09541, score=0, range=397-418, strand=  
target 5' GACCUGCAAGCAAAACUGGCUA 3'  
.....  
query 3' CUGGACGUUCGUUUUGACCGAU 5'  
query=miR1068, target=R03G\_14995, score=0.5, range=397-418, stran  
target 5' GGCCUGCAAGCAAAACUGGCUA 3'  
.....  
query 3' CUGGACGUUCGUUUUGACCGAU 5'  
query=miR1068, target=R03G\_02714, score=3.5, range=397-418, stran  
target 5' GACUUACAAGCAAAACUAGCUA 3'  
.....  
query 3' CUGGACGUUCGUUUUGACCGAU 5'  
query=miR1068, target=R03G\_02962, score=3.5, range=182-202, stran  
target 5' AACUU-CAAGCAAAACUGGCUU 3'  
.....  
query 3' CUGGACGUUCGUUUUGACCGAU 5'  
query=miR1068, target=R03G\_06842, score=4, range=5290-5311, stran  
target 5' GACUUGCAAGCAAAACUGAUUG 3'  
.....  
query 3' CUGGACGUUCGUUUUGACCGAU 5'  
query=miR1068, target=R03G\_04655, score=4, range=1790-1811, stran  
target 5' GACAUGAAAGUAAAACUGGCUU 3'  
.....  
query 3' CUGGACGUUCGUUUUGACCGAU 5'  
query=miR1068, target=R03G\_14692, score=4, range=524-546, strand=  
target 5' GACCUGCUGGGCAAAACUCGCUA 3'  
.....  
query 3' CUGGACG-UUCGUUUUGACCGAU 5'









```
.....:
query 3' UACGACCGUUAGUGACCUU 5'
query=miR2602a, target=R03G_09614, score=0, range=68-86, strand=1
target 5' AUGCUGGCAAUCACUGGAA 3'
.....:
query 3' UACGACCGUUAGUGACCUU 5'
query=miR2602a, target=R03G_17462, score=0, range=869-887, strand
target 5' AUGCUGGCAAUCACUGGAA 3'
.....:
query 3' UACGACCGUUAGUGACCUU 5'
query=miR2602a, target=R03G_02233, score=0, range=266-284, strand
target 5' AUGCUGGCAAUCACUGGAA 3'
.....:
query 3' UACGACCGUUAGUGACCUU 5'
query=miR2602a, target=R03G_14983, score=1, range=542-560, strand
target 5' AUGCUGGCAAUACUGGAA 3'
.....:
query 3' UACGACCGUUAGUGACCUU 5'
query=miR2602a, target=R03G_03583, score=1, range=542-560, strand
target 5' ACGCUGGCAAUCACUGGAA 3'
: .....:
query 3' UACGACCGUUAGUGACCUU 5'
query=miR2602a, target=R03G_03556, score=2, range=542-560, strand
target 5' AUGCUGACAAUCACUGGAA 3'
.....: .....:
query 3' UACGACCGUUAGUGACCUU 5'
query=miR2602a, target=R03G_13096, score=3, range=269-287, strand
target 5' AUGGUGGCAGUCGCUGGAA 3'
:: .....: .....:
query 3' UACGACCGUUAGUGACCUU 5'
query=miR2602a, target=R03G_12495, score=3, range=320-339, strand
target 5' AUGCUUAGCAAUCACUGGAU 3'
:::: : .....: .....:
query 3' UACG-ACCGUUAGUGACCUU 5'
query=miR2602a, target=R03G_06752, score=3.5, range=179-197, stra
target 5' AUGAUGGUAUUACUGGAG 3'
::: .....: .....:
query 3' UACGACCGUUAGUGACCUU 5'
query=miR2602a, target=R03G_10535, score=4, range=2123-2141, stra
target 5' GUGUUGGCAAUGACUGGGA 3'
.....: .....:
query 3' UACGACCGUUAGUGACCUU 5'
query=miR2602a, target=R03G_12181, score=4, range=1292-1310, stra
target 5' GUGUUGGCAAUGACUGGGA 3'
.....: .....:
.....:
```

query 3' UACGACCGUUAGUGACCUU 5'  
query=miR2602a, target=R03G\_15136, score=4, range=185-203, strand  
target 5' GUGUUGGCAAUGACUGGGA 3'  
.....: .....

query 3' UACGACCGUUAGUGACCUU 5'  
query=miR2602a, target=R03G\_16143, score=4, range=4475-4493, strand  
target 5' GUGUUGGCAAUGACUGGGA 3'  
.....: .....

query 3' UACGACCGUUAGUGACCUU 5'  
query=miR2602a, target=R03G\_02691, score=4, range=2924-2942, strand  
target 5' GUGUUGGCAAUGACUGGGA 3'  
.....: .....

query 3' UACGACCGUUAGUGACCUU 5'  
query=miR2602a, target=R03G\_17318, score=4, range=4478-4496, strand  
target 5' GUGUUGGCAAUGACUGGGA 3'  
.....: .....

query 3' UACGACCGUUAGUGACCUU 5'  
query=miR2602a, target=R03G\_05918, score=4, range=998-1016, strand  
target 5' GUGUUGGCAAUGACUGGGA 3'  
.....: .....

query 3' UACGACCGUUAGUGACCUU 5'  
query=miR2602a, target=R03G\_12533, score=4, range=3818-3836, strand  
target 5' GUGUUGGCAAUGACUGGGA 3'  
.....: .....

query 3' UACGACCGUUAGUGACCUU 5'  
query=miR2602a, target=R03G\_07028, score=4, range=3461-3479, strand  
target 5' GUGUUGGCAAUGACUGGGA 3'  
.....: .....

query 3' UACGACCGUUAGUGACCUU 5'  
query=miR2602a, target=R03G\_05520, score=4, range=1145-1163, strand  
target 5' GUGUUGGCAAUGACUGGGA 3'  
.....: .....

query 3' UACGACCGUUAGUGACCUU 5'  
query=miR2602a, target=R03G\_17383, score=4, range=977-995, strand  
target 5' GUGUUGGCAAUGACUGGGA 3'  
.....: .....

query 3' UACGACCGUUAGUGACCUU 5'  
query=miR2602a, target=R03G\_17329, score=4, range=3815-3833, strand  
target 5' GUGUUGGCAAUGACUGGGA 3'  
.....: .....

query 3' UACGACCGUUAGUGACCUU 5'  
query=miR2602a, target=R03G\_17274, score=4, range=4301-4319, strand  
target 5' GUGUUGGCAAUGACUGGGA 3'  
.....: .....

query 3' UACGACCGUUAGUGACCUU 5'



```

target 5' UUUGC UUUGUUGCCUCUUUA 3'
... ::::::::::::::::::::
query 3' GAAGGAAACAACGGAGAAAU 5'
query=miR8138, target=R03G_08778, score=2, range=629-648, strand=
target 5' CUGCCUUUGUUGCCUCUUUC 3'
:: ::::::::::::::::::::
query 3' GAAGGAAACAACGGAGAAAU 5'
query=miR8138, target=R03G_04385, score=2.5, range=407-426, stran
target 5' CUGCCCUUGUUGCCUCUUUG 3'
:: :: ::::::::::::::::::::.
query 3' GAAGGAAACAACGGAGAAAU 5'
query=miR8138, target=R03G_04628, score=2.5, range=206-225, stran
target 5' UUUCCUUUGUUGUUUCUUUA 3'
.....:.....:.....:
query 3' GAAGGAAACAACGGAGAAAU 5'
query=miR8138, target=R03G_03926, score=2.5, range=148-166, stran
target 5' CUUCCUUUG-UGCCUCUUUG 3'
.....:.....:.....:
query 3' GAAGGAAACAACGGAGAAAU 5'
query=miR8138, target=R03G_16000, score=3, range=794-813, strand=
target 5' GUUCCUUUGUAGCCUCUUUA 3'
.....:.....:.....:
query 3' GAAGGAAACAACGGAGAAAU 5'
query=miR8138, target=R03G_02293, score=3, range=956-975, strand=
target 5' UUUCUUUUGUUGUUUCUUUA 3'
.....:.....:.....:
query 3' GAAGGAAACAACGGAGAAAU 5'
query=miR8138, target=R03G_01819, score=3, range=1316-1336, stran
target 5' CUUCCUCUUGUUGUUUCUUUA 3'
.....:.....:.....:
query 3' GAAGGA-AACAACGGAGAAAU 5'
query=miR8138, target=R03G_14329, score=3.5, range=1205-1224, str
target 5' CUUCAGUUGUUGUCUCUUUG 3'
:::: ::::::::::::::::::::.
query 3' GAAGGAAACAACGGAGAAAU 5'
query=miR8138, target=R03G_11173, score=3.5, range=2106-2124, str
target 5' CUACC-UUGUUGCCUUUUUG 3'
:: :: ::::::::::::::::::::.
query 3' GAAGGAAACAACGGAGAAAU 5'
query=miR8138, target=R03G_08998, score=3.5, range=1179-1198,
strand=-1
target 5' GUGUCUUUGUUGCCUUUUUA 3'
: ::::::::::::::::::::
query 3' GAAGGAAACAACGGAGAAAU 5'
query=miR8138, target=R03G_04233, score=3.5, range=966-984, stran

```



target 5' CUUUUUUAGUUGCUUCUUUA 3'  
:~::~: ~::~:  
query 3' GAAGGAAACAACGGAGAAAU 5'  
query=miR8138, target=R03G\_04369, score=4, range=212-231, strand=  
target 5' CUUUUUUGGUUGCUUCUUUA 3'  
:~::~: ~::~:  
query 3' GAAGGAAACAACGGAGAAAU 5'  
query=miR8138, target=R03G\_11011, score=4, range=512-531, strand=  
target 5' CUUUCUUUUUUGCUUCUUUG 3'  
:~::~: ~::~:  
query 3' GAAGGAAACAACGGAGAAAU 5'  
query=miR8138, target=R03G\_10851, score=4, range=767-787, strand=  
target 5' CUUGUUUUUGUUGCUUUUUUA 3'  
:~::~: ~::~:  
query 3' GAA-GGAAACAACGGAGAAAU 5'  
query=miR8138, target=R03G\_15381, score=4, range=231-251, strand=  
target 5' CUUCCUUUGUAUGCUUCUUUU 3'  
:~::~: ~::~:  
query 3' GAAGGAAACA-ACGGAGAAAU 5'  
query=miR8138, target=R03G\_00386, score=4, range=27-47, strand=-1  
target 5' CUUUUUUUGUUGCCUUCUUUU 3'  
:~::~: ~::~:  
query 3' GAAGGAAACAACGG-AGAAAU 5'  
query=miR8138, target=R03G\_07955, score=4, range=282-300, strand=  
target 5' UUUCCUAUGUUG-CUCUUUG 3'  
.~::~: ~::~:  
query 3' GAAGGAAACAACGGAGAAAU 5'  
query=miR6147, target=R03G\_05963, score=0, range=387-408, strand=  
target 5' AGUGGGGUUUUGAUGCAUGUCA 3'  
:~::~: ~::~:  
query 3' UCACCCCAAACUACGUACAGU 5'  
query=miR6147, target=R03G\_08106, score=0, range=387-408, strand=  
target 5' AGUGGGGUUUUGAUGCAUGUCA 3'  
:~::~: ~::~:  
query 3' UCACCCCAAACUACGUACAGU 5'  
query=miR6147, target=R03G\_17163, score=0, range=387-408, strand=  
target 5' AGUGGGGUUUUGAUGCAUGUCA 3'  
:~::~: ~::~:  
query 3' UCACCCCAAACUACGUACAGU 5'  
query=miR6147, target=R03G\_15896, score=0, range=387-408, strand=  
target 5' AGUGGGGUUUUGAUGCAUGUCA 3'  
:~::~: ~::~:  
query 3' UCACCCCAAACUACGUACAGU 5'  
query=miR6147, target=R03G\_14346, score=0, range=387-408, strand=  
target 5' AGUGGGGUUUUGAUGCAUGUCA 3'



query 3' UCACCCCAAACUACGUACAGU 5'  
query=miR6147, target=R03G\_02711, score=0, range=387-408, strand=  
target 5' AGUGGGGUUUUGAUGCAUGUCA 3'  
query 3' UCACCCCAAACUACGUACAGU 5'  
query=miR396b, target=R03G\_03508, score=2, range=780-800, strand=  
target 5' UGUUCAAGAAAGCUGUGGAA 3'  
query 3' UCAAG-UUCUUUCGACACCUU 5'  
query=miR396b, target=R03G\_02790, score=4, range=740-759, strand=  
target 5' CGCUCAAGAAAGCUAUGGAA 3'  
query 3' UCAAGUUCUUUCGACACCUU 5'  
query=miR396b, target=R03G\_16340, score=4, range=605-624, strand=  
target 5' AGUUGAUGGAAGCUGUGGAU 3'  
query 3' UCAAGUUCUUUCGACACCUU 5'  
query=miR396b, target=R03G\_07651, score=4, range=4206-4225, stran  
target 5' AAUUAAGAAAGCUGUGAAA 3'  
query 3' UCAAGUUCUUUCGACACCUU 5'  
query=miR396b, target=R03G\_08307, score=4, range=804-822, strand=  
target 5' AGUUGAAGAAAGCU-UGGAU 3'  
query 3' UCAAGUUCUUUCGACACCUU 5'  
query=miR396b, target=R03G\_06158, score=4, range=1190-1209, stran  
target 5' UGCGCAUGAAAGCUGUGGAA 3'  
query 3' UCAAGUUCUUUCGACACCUU 5'  
query=miR7711-5p.1, target=R03G\_12954, score=2, range=54-75, stra  
target 5' CAAGAAGUCAACAGCAAAGUA 3'  
query 3' GUUCUUCAGUUUGUCGAUUCAU 5'  
query=miR7711-5p.1, target=R03G\_10762, score=2, range=54-75, stra  
target 5' CAAGAAGUCAACAGCAAAGUA 3'  
query 3' GUUCUUCAGUUUGUCGAUUCAU 5'  
query=miR7711-5p.1, target=R03G\_10770, score=2, range=54-75, stra  
target 5' CAAGAAGUCAACAGCAAAGUA 3'  
query 3' GUUCUUCAGUUUGUCGAUUCAU 5'  
query=miR7711-5p.1, target=R03G\_00304, score=2, range=54-75, stra  
target 5' CAAGAAGUCAACAGCAAAGUA 3'

query 3' GUUCUUCAGUUUGUCGAUUCAU 5'  
query=miR7711-5p.1, target=R03G\_04690, score=4, range=54-75, strand=+  
target 5' CAAGAAGUCAAACAGCGAAAUA 3'  
..... :: ::  
query 3' GUUCUUCAGUUUGUCGAUUCAU 5'  
query=miR7711-5p.1, target=R03G\_05431, score=4, range=54-75, strand=+  
target 5' CAAGAAGUCAAACAGCAAAAUA 3'  
..... :: ::  
query 3' GUUCUUCAGUUUGUCGAUUCAU 5'  
query=miR7711-5p.1, target=R03G\_02822, score=4, range=54-75, strand=+  
target 5' CAAGAAGUCAAACAGCGAAAUA 3'  
..... :: ::  
query 3' GUUCUUCAGUUUGUCGAUUCAU 5'  
query=miR7711-5p.1, target=R03G\_09168, score=4, range=54-75, strand=+  
target 5' CAAGAAGUCAAACAGCAAAAUA 3'  
..... :: ::  
query 3' GUUCUUCAGUUUGUCGAUUCAU 5'  
query=miR7711-5p.1, target=R03G\_15141, score=4, range=54-75, strand=+  
target 5' CAAGAAGUCAAACAGCAAAAUA 3'  
..... :: ::  
query 3' GUUCUUCAGUUUGUCGAUUCAU 5'  
query=miR7711-5p.1, target=R03G\_04787, score=4, range=54-75, strand=+  
target 5' CAAGAAGUCAAACAGCAAAAUA 3'  
..... :: ::  
query 3' GUUCUUCAGUUUGUCGAUUCAU 5'  
query=miR5373, target=R03G\_13221, score=0, range=1731-1752, strand=-  
target 5' AACAUCAUCAGCAUACAAGAGA 3'  
.....  
query 3' UUGUAGUAGUCGUAUGUUCUCU 5'  
query=miR5373, target=R03G\_13224, score=0, range=1731-1752, strand=-  
target 5' AACAUCAUCAGCAUACAAGAGA 3'  
.....  
query 3' UUGUAGUAGUCGUAUGUUCUCU 5'  
query=miR5373, target=R03G\_04123, score=0, range=1731-1752, strand=-  
target 5' AACAUCAUCAGCAUACAAGAGA 3'  
.....  
query 3' UUGUAGUAGUCGUAUGUUCUCU 5'  
query=miR5373, target=R03G\_04120, score=0, range=1731-1752, strand=-  
target 5' AACAUCAUCAGCAUACAAGAGA 3'  
.....  
query 3' UUGUAGUAGUCGUAUGUUCUCU 5'  
query=miR5373, target=R03G\_04203, score=0, range=675-696, strand=-  
target 5' AACAUCAUCAGCAUACAAGAGA 3'  
.....  
query 3' UUGUAGUAGUCGUAUGUUCUCU 5'

query=miR5373, target=R03G\_13218, score=0, range=144-165, strand=  
 target 5' AACAUCAUCAGCAUACAAGAGA 3'  
 ::::::::::::::::::::::::::::  
 query 3' UUGUAGUAGUCGUAUGUUCUCU 5'  
 query=miR5373, target=R03G\_16122, score=0, range=144-165, strand=  
 target 5' AACAUCAUCAGCAUACAAGAGA 3'  
 ::::::::::::::::::::::::::::  
 query 3' UUGUAGUAGUCGUAUGUUCUCU 5'  
 query=miR5373, target=R03G\_14836, score=1, range=1482-1503, stran  
 target 5' AACGUCAUCAGCAUACAAGAGG 3'  
 ::::::::::::::::::::::::::::  
 query 3' UUGUAGUAGUCGUAUGUUCUCU 5'  
 query=miR5373, target=R03G\_06780, score=1, range=759-780, strand=  
 target 5' CACAUCAUCAUCAGCAUACAAGAGA 3'  
 ::::::::::::::::::::::::::::  
 query 3' UUGUAGUAGUCGUAUGUUCUCU 5'  
 query=miR5373, target=R03G\_00484, score=1.5, range=32-53, strand=  
 target 5' AAUGUCAUCAGCAUACAAGAGG 3'  
 ::::::::::::::::::::::::::::  
 query 3' UUGUAGUAGUCGUAUGUUCUCU 5'  
 query=miR5373, target=R03G\_16800, score=2, range=3363-3384, stran  
 target 5' CACAUCAUCAUCAGCAUACAGGAGA 3'  
 ::::::::::::::::::::::::::::  
 query 3' UUGUAGUAGUCGUAUGUUCUCU 5'  
 query=miR5373, target=R03G\_15267, score=2, range=1125-1146, stran  
 target 5' CACAUCAUCAUCAGCAUACAGGAGA 3'  
 ::::::::::::::::::::::::::::  
 query 3' UUGUAGUAGUCGUAUGUUCUCU 5'  
 query=miR5373, target=R03G\_17246, score=2, range=564-585, strand=  
 target 5' CACAUCAUCAUCAGCAUACAGGAGA 3'  
 ::::::::::::::::::::::::::::  
 query 3' UUGUAGUAGUCGUAUGUUCUCU 5'  
 query=miR5373, target=R03G\_16819, score=2, range=135-156, strand=  
 target 5' CACAUCAUCAUCAGCAUACAGGAGA 3'  
 ::::::::::::::::::::::::::::  
 query 3' UUGUAGUAGUCGUAUGUUCUCU 5'  
 query=miR5373, target=R03G\_12339, score=3.5, range=1656-1677,  
 strand=-1  
 target 5' GACUUCAUCAGCAUUCAAGAGA 3'  
 .:: :::::::::::::: ::::::::::  
 query 3' UUGUAGUAGUCGUAUGUUCUCU 5'  
 query=miR5373, target=R03G\_14120, score=4, range=145-166, strand=  
 target 5' UACAUCAUCCGGCAUACAAAAGA 3'  
 :::::::::::::: ::::  
 query 3' UUGUAGUAGUCGUAUGUUCUCU 5'





query 3' CCUAGUAACAGUACGAUUUUUAU 5'  
query=miR1515, target=R03G\_13271, score=3, range=719-740, strand=  
target 5' GGAUCAUUGUCAUGCUGAAAAA 3'

query 3' CCUAGUAACAGUACGAUUUUUAU 5'  
query=miR1515, target=R03G\_07112, score=3, range=542-563, strand=  
target 5' GGAUCAUUGUCAUGCUGAAAAA 3'

query 3' CCUAGUAACAGUACGAUUUUUAU 5'  
query=miR1515, target=R03G\_13266, score=3, range=497-518, strand=  
target 5' GGAUCAUUGUCAUGCUGAAAAA 3'

query 3' CCUAGUAACAGUACGAUUUUUAU 5'  
query=miR1515, target=R03G\_15166, score=3, range=707-728, strand=  
target 5' GGAUCAUUAUCAUGUUGAAAUA 3'

query 3' CCUAGUAACAGUACGAUUUUUAU 5'  
query=miR1515, target=R03G\_13714, score=3, range=710-731, strand=  
target 5' GGAUCAUUAUCGUGGCUGAAAUA 3'

query 3' CCUAGUAACAGUACGAUUUUUAU 5'  
query=miR1515, target=R03G\_16742, score=3, range=710-731, strand=  
target 5' GGAUCAUUAUCGUGGCUGAAAUA 3'

query 3' CCUAGUAACAGUACGAUUUUUAU 5'  
query=miR1515, target=R03G\_17416, score=3, range=710-731, strand=  
target 5' GGAUCAUUAUCGUGGCUGAAAUA 3'

query 3' CCUAGUAACAGUACGAUUUUUAU 5'  
query=miR1515, target=R03G\_17291, score=3, range=710-731, strand=  
target 5' GGAUCAUUAUCGUGGCUGAAAUA 3'

query 3' CCUAGUAACAGUACGAUUUUUAU 5'  
query=miR1515, target=R03G\_02824, score=3, range=710-731, strand=  
target 5' GGAUCAUUAUCGUGGCUGAAAUA 3'

query 3' CCUAGUAACAGUACGAUUUUUAU 5'  
query=miR1515, target=R03G\_16372, score=3, range=710-731, strand=  
target 5' GGAUCAUUAUCGUGGCUGAAAUA 3'

query 3' CCUAGUAACAGUACGAUUUUUAU 5'  
query=miR1515, target=R03G\_07705, score=3, range=710-731, strand=  
target 5' GGAUCAUUAUCGUGGCUGAAAUA 3'









:::::::::: :  
query 3' CCUAGUAACAGUACGAUUUUUAU 5'  
query=miR1515, target=R03G\_15895, score=3.5, range=20-41, strand=  
target 5' GGAUCGUUAUCAUGUUGAAAUA 3'  
:::::::::: :  
query 3' CCUAGUAACAGUACGAUUUUUAU 5'  
query=miR1515, target=R03G\_16536, score=3.5, range=20-41, strand=  
target 5' GGAUCGUUAUCAUGUUGAAAUA 3'  
:::::::::: :  
query 3' CCUAGUAACAGUACGAUUUUUAU 5'  
query=miR1515, target=R03G\_05953, score=4, range=710-731, strand=  
target 5' GGGUCGUUGUCAUGCUGAAAAA 3'  
:::::::::: :  
query 3' CCUAGUAACAGUACGAUUUUUAU 5'  
query=miR1515, target=R03G\_07688, score=4, range=719-740, strand=  
target 5' GGAUCAUUGUCAUGUUGAAAAA 3'  
:::::::::: :  
query 3' CCUAGUAACAGUACGAUUUUUAU 5'  
query=miR1515, target=R03G\_16359, score=4, range=719-740, strand=  
target 5' GGAUCAUUGUCAUGUUGAAAAA 3'  
:::::::::: :  
query 3' CCUAGUAACAGUACGAUUUUUAU 5'  
query=miR1515, target=R03G\_16545, score=4, range=719-740, strand=  
target 5' GGAUCAUUGUCAUGUUGAAAAA 3'  
:::::::::: :  
query 3' CCUAGUAACAGUACGAUUUUUAU 5'  
query=miR1515, target=R03G\_03772, score=4, range=719-740, strand=  
target 5' GGAUCAUUGUCAUGCUGGAAGA 3'  
:::::::::: :  
query 3' CCUAGUAACAGUACGAUUUUUAU 5'  
query=miR1515, target=R03G\_01618, score=4, range=719-740, strand=  
target 5' GGAUCAUUGUCAUGCUGGAAGA 3'  
:::::::::: :  
query 3' CCUAGUAACAGUACGAUUUUUAU 5'  
query=miR1515, target=R03G\_08842, score=4, range=719-740, strand=  
target 5' GGAUCAUUGUCAUGCUGGAAGA 3'  
:::::::::: :  
query 3' CCUAGUAACAGUACGAUUUUUAU 5'  
query=miR1515, target=R03G\_02844, score=4, range=497-518, strand=  
target 5' GGAUCAUUGUCAUGCUGGAAGA 3'  
:::::::::: :  
query 3' CCUAGUAACAGUACGAUUUUUAU 5'  
query=miR1515, target=R03G\_03766, score=4, range=497-518, strand=  
target 5' GGAUCAUUGUCAUGCUGGAAGA 3'  
:::::::::: :

query 3' CCUAGUAACAGUACGAUUUUUUAU 5'  
query=miR1515, target=R03G\_13137, score=4, range=617-638, strand=  
target 5' GGAUCAUUGUCAUGCUGGAAGA 3'  
..... :  
query 3' CCUAGUAACAGUACGAUUUUUUAU 5'  
query=miR1515, target=R03G\_03554, score=4, range=611-632, strand=  
target 5' GGAUCAUUGUCAUGCUGGAAGA 3'  
..... :  
query 3' CCUAGUAACAGUACGAUUUUUUAU 5'  
query=miR1515, target=R03G\_08657, score=4, range=611-632, strand=  
target 5' GGAUCAUUGUCAUGCUGGAAGA 3'  
..... :  
query 3' CCUAGUAACAGUACGAUUUUUUAU 5'  
query=miR1515, target=R03G\_10772, score=4, range=608-629, strand=  
target 5' GGAUCAUUGUCAUGCUGGAAGA 3'  
..... :  
query 3' CCUAGUAACAGUACGAUUUUUUAU 5'  
query=miR1515, target=R03G\_10780, score=4, range=710-731, strand=  
target 5' GGGUCGUUGUCAUGCUGAAAAA 3'  
..... :  
query 3' CCUAGUAACAGUACGAUUUUUUAU 5'  
query=miR1515, target=R03G\_00256, score=4, range=710-731, strand=  
target 5' GGGUCGUUGUCAUGCUGAAAAA 3'  
..... :  
query 3' CCUAGUAACAGUACGAUUUUUUAU 5'  
query=miR1515, target=R03G\_14361, score=4, range=710-731, strand=  
target 5' GGGUCGUUGUCAUGCUGAAAAA 3'  
..... :  
query 3' CCUAGUAACAGUACGAUUUUUUAU 5'  
query=miR1515, target=R03G\_05267, score=4, range=710-731, strand=  
target 5' GGGUCGUUGUCAUGCUGAAAAA 3'  
..... :  
query 3' CCUAGUAACAGUACGAUUUUUUAU 5'  
query=miR1515, target=R03G\_09967, score=4, range=710-731, strand=  
target 5' GGGUCGUUGUCAUGCUGAAAAA 3'  
..... :  
query 3' CCUAGUAACAGUACGAUUUUUUAU 5'  
query=miR1515, target=R03G\_04207, score=4, range=710-731, strand=  
target 5' GGGUCGUUGUCAUGCUGAAAAA 3'  
..... :  
query 3' CCUAGUAACAGUACGAUUUUUUAU 5'  
query=miR1515, target=R03G\_04210, score=4, range=710-731, strand=  
target 5' GGGUCGUUGUCAUGCUGAAAAA 3'  
..... :  
query 3' CCUAGUAACAGUACGAUUUUUUAU 5'





query 3' CCUAGUAACAGUACGAUUUUUAU 5'  
query=miR1515, target=R03G\_17167, score=4, range=59-80, strand=-1  
target 5' GGAUUGUUAUCAUGUUGAAAUA 3'

query 3' CCUAGUAACAGUACGAUUUUUAU 5'  
query=miR1515, target=R03G\_01952, score=4, range=59-80, strand=-1  
target 5' GGAUUGUUAUCAUGUUGAAAUA 3'

query 3' CCUAGUAACAGUACGAUUUUUAU 5'  
query=miR1515, target=R03G\_07301, score=4, range=59-80, strand=-1  
target 5' GGAUUGUUAUCAUGUUGAAAUA 3'

query 3' CCUAGUAACAGUACGAUUUUUAU 5'  
query=miR1515, target=R03G\_04678, score=4, range=59-80, strand=-1  
target 5' GGAUUGUUAUCAUGUUGAAAUA 3'

query 3' CCUAGUAACAGUACGAUUUUUAU 5'  
query=miR1515, target=R03G\_07681, score=4, range=59-80, strand=-1  
target 5' GGAUUGUUAUCAUGUUGAAAUA 3'

query 3' CCUAGUAACAGUACGAUUUUUAU 5'  
query=miR1515, target=R03G\_06723, score=4, range=59-80, strand=-1  
target 5' GGAUUGUUAUCAUGUUGAAAUA 3'

query 3' CCUAGUAACAGUACGAUUUUUAU 5'  
query=miR1515, target=R03G\_02720, score=4, range=59-80, strand=-1  
target 5' GGAUUGUUAUCAUGUUGAAAUA 3'

query 3' CCUAGUAACAGUACGAUUUUUAU 5'  
query=miR1515, target=R03G\_12676, score=4, range=20-41, strand=-1  
target 5' GGAUUGUUAUCAUGUUGAAAUA 3'

query 3' CCUAGUAACAGUACGAUUUUUAU 5'  
query=miR1515, target=R03G\_03112, score=4, range=709-731, strand=  
target 5' GGAUCAUUAUCAUGCUGAAAAGUA 3'

query 3' CCUAGUAACAGUACGA-UUUUUAU 5'  
query=miR1515, target=R03G\_05522, score=4, range=709-731, strand=  
target 5' GGAUCAUUAUCAUGCUGAAAAGUA 3'

query 3' CCUAGUAACAGUACGA-UUUUUAU 5'  
query=miR1515, target=R03G\_00240, score=4, range=652-674, strand=  
target 5' GGAUCAUUAUCAUGCUGAAAAGUA 3'



query=miR1515, target=R03G\_15145, score=4, range=343-365, strand=  
target 5' GGAUCAUUAUCAUGCUGAAAGUA 3'  
:~::~:~::~:~::~:  
query 3' CCUAGUAACAGUACGA-UUUUAU 5'  
query=miR1515, target=R03G\_03791, score=4, range=343-365, strand=  
target 5' GGAUCAUUAUCAUGCUGAAAGUA 3'  
:~::~:~::~:~::~:  
query 3' CCUAGUAACAGUACGA-UUUUAU 5'  
query=miR1515, target=R03G\_09926, score=4, range=343-365, strand=  
target 5' GGAUCAUUAUCAUGCUGAAAGUA 3'  
:~::~:~::~:~::~:  
query 3' CCUAGUAACAGUACGA-UUUUAU 5'  
query=miR1515, target=R03G\_11536, score=4, range=343-365, strand=  
target 5' GGAUCAUUAUCAUGCUGAAAGUA 3'  
:~::~:~::~:~::~:  
query 3' CCUAGUAACAGUACGA-UUUUAU 5'  
query=miR1515, target=R03G\_05516, score=4, range=343-365, strand=  
target 5' GGAUCAUUAUCAUGCUGAAAGUA 3'  
:~::~:~::~:~::~:  
query 3' CCUAGUAACAGUACGA-UUUUAU 5'  
query=miR1515, target=R03G\_17328, score=4, range=343-365, strand=  
target 5' GGAUCAUUAUCAUGCUGAAAGUA 3'  
:~::~:~::~:~::~:  
query 3' CCUAGUAACAGUACGA-UUUUAU 5'  
query=miR1515, target=R03G\_15170, score=4, range=343-365, strand=  
target 5' GGAUCAUUAUCAUGCUGAAAGUA 3'  
:~::~:~::~:~::~:  
query 3' CCUAGUAACAGUACGA-UUUUAU 5'  
query=miR1515, target=R03G\_16541, score=4, range=343-365, strand=  
target 5' GGAUCAUUAUCAUGCUGAAAGUA 3'  
:~::~:~::~:~::~:  
query 3' CCUAGUAACAGUACGA-UUUUAU 5'  
query=miR1515, target=R03G\_16124, score=4, range=343-365, strand=  
target 5' GGAUCAUUAUCAUGCUGAAAGUA 3'  
:~::~:~::~:~::~:  
query 3' CCUAGUAACAGUACGA-UUUUAU 5'  
query=miR1515, target=R03G\_15286, score=4, range=343-365, strand=  
target 5' GGAUCAUUAUCAUGCUGAAAGUA 3'  
:~::~:~::~:~::~:  
query 3' CCUAGUAACAGUACGA-UUUUAU 5'  
query=miR1515, target=R03G\_13752, score=4, range=343-365, strand=  
target 5' GGAUCAUUAUCAUGCUGAAAGUA 3'  
:~::~:~::~:~::~:  
query 3' CCUAGUAACAGUACGA-UUUUAU 5'  
query=miR1515, target=R03G\_03560, score=4, range=343-365, strand=





```
:: ..: ::::::::::::::.
query 3' UACGUACUUGAAUAAUUGUU 5'
query=miR7502b, target=R03G_12923, score=4, range=583-602, strand
target 5' UUGCAUGAAUUUUAUUAUGA 3'
:::::::::::::::::::
query 3' UACGUACUUGAAUAAUUGUU 5'
query=miR7502b, target=R03G_16530, score=4, range=1012-1031, strand
target 5' UUGAAUGAAUUUUAUUAUAA 3'
:: :::::::::::::::::::::
query 3' UACGUACUUGAAUAAUUGUU 5'
query=miR7502b, target=R03G_02695, score=4, range=3805-3825, strand
target 5' AUGAAUGAAUUUUAUUGAACAA 3'
::: :::::::::::::::::::::
query 3' UACGUACUUGAAUAA-UUGUU 5'
query=miR7502b, target=R03G_03550, score=4, range=3805-3825, strand
target 5' AUGAAUGAAUUUUAUUGAACAA 3'
::: :::::::::::::::::::::
query 3' UACGUACUUGAAUAA-UUGUU 5'
query=miR7502b, target=R03G_09175, score=4, range=3805-3825, strand
target 5' AUGAAUGAAUUUUAUUGAACAA 3'
::: :::::::::::::::::::::
query 3' UACGUACUUGAAUAA-UUGUU 5'
query=miR7502b, target=R03G_11541, score=4, range=1195-1215, strand
target 5' AUGAAUGAAUUUUAUUGAACAA 3'
::: :::::::::::::::::::::
query 3' UACGUACUUGAAUAA-UUGUU 5'
query=miR7502b, target=R03G_08532, score=4, range=1304-1322, strand
target 5' AUGCA-GAACUUAUUAAGA 3'
::::: :::::::::::::::::::::
query 3' UACGUACUUGAAUAAUUGUU 5'
query=miR7502b, target=R03G_11910, score=4, range=24-43, strand=1
target 5' AUCCUAAAUUUUAUUAACAA 3'
:: : : :::::::::::::::::::::
query 3' UACGUACUUGAAUAAUUGUU 5'
query=miR7502b, target=R03G_08587, score=4, range=2021-2039, strand
target 5' AU-CAAGAACUUAUUGACAU 3'
:: :: :::::::::::::::::::::
query 3' UACGUACUUGAAUAAUUGUU 5'
query=miR7502b, target=R03G_02564, score=4, range=443-461, strand
target 5' UUACA-GAAUUUUAUUAACAA 3'
: :: :::::::::::::::::::::
query 3' UACGUACUUGAAUAAUUGUU 5'
query=miR7502b, target=R03G_09426, score=4, range=1132-1151, strand
target 5' AAGCACAACUUAUUAACAU 3'
: ::: :::::::::::::::::::::
```

query 3' UACGUACUUGAAUAAUUGUU 5'  
query=miR7502b, target=R03G\_08891, score=4, range=109-127, strand  
target 5' AUGCUCGAA-UUAUUAACAA 3'  
:::: :::: ::::: :::::  
query 3' UACGUACUUGAAUAAUUGUU 5'  
query=miR7502b, target=R03G\_06589, score=4, range=316-335, strand  
target 5' GUGCUUGAGCUUUAUUAUAG 3'  
.:::: ::::: ::::: :::::  
query 3' UACGUACUUGAAUAAUUGUU 5'  
query=miR7502b, target=R03G\_09234, score=4, range=83-101, strand=  
target 5' AU-CAUGGGCUUUAUUAAGCAA 3'  
:: ::::: ::::: :::::  
query 3' UACGUACUUGAAUAAUUGUU 5'  
query=miR7502b, target=R03G\_02236, score=4, range=308-327, strand  
target 5' AUUCUUGAACUUAUUAACAA 3'  
:: : ::::: ::::: :::::  
query 3' UACGUACUUGAAUAAUUGUU 5'  
query=miR7502b, target=R03G\_08139, score=4, range=407-427, strand  
target 5' AUGACAUUAACUUAUUAUCA 3'  
::: ::: ::::: :::  
query 3' UAC-GUACUUGAAUAAUUGUU 5'  
query=miR7502b, target=R03G\_08587, score=4, range=620-639, strand  
target 5' UUGCUUUAACUUAUUAACAU 3'  
::: : ::::: ::::: :::  
query 3' UACGUACUUGAAUAAUUGUU 5'  
query=miR951, target=R03G\_04122, score=0, range=196-217, strand=1  
target 5' CGUAGCCAGAUCGUCAAGAGCA 3'  
::::: ::::: ::::: :::::  
query 3' GCAUCGGUCUAGCAGUUCUCGU 5'  
query=miR951, target=R03G\_13220, score=0, range=196-217, strand=1  
target 5' CGUAGCCAGAUCGUCAAGAGCA 3'  
::::: ::::: ::::: :::::  
query 3' GCAUCGGUCUAGCAGUUCUCGU 5'  
query=miR951, target=R03G\_04124, score=0, range=196-217, strand=1  
target 5' CGUAGCCAGAUCGUCAAGAGCA 3'  
::::: ::::: ::::: :::::  
query 3' GCAUCGGUCUAGCAGUUCUCGU 5'  
query=miR951, target=R03G\_13223, score=0.5, range=196-217, strand  
target 5' CGUAGUCAGAUCGUCAAGAGCA 3'  
::::: ::::: ::::: :::::  
query 3' GCAUCGGUCUAGCAGUUCUCGU 5'  
query=miR951, target=R03G\_04119, score=2, range=196-217, strand=1  
target 5' CGUAGCCAGAUGGUCAAGAGCA 3'  
::::: ::::: ::::: :::::  
query 3' GCAUCGGUCUAGCAGUUCUCGU 5'

query=miR8741, target=R03G\_13273, score=0, range=2206-2227, stran  
target 5' CCAUCAUCAUUCAUUCAGGCCA 3'  
::::::::::::::::::::::::::  
query 3' GGUAGUAGUAAGUAAGUCCGGU 5'  
query=miR8741, target=R03G\_10217, score=0, range=2206-2227, stran  
target 5' CCAUCAUCAUUCAUUCAGGCCA 3'  
::::::::::::::::::::::::::  
query 3' GGUAGUAGUAAGUAAGUCCGGU 5'  
query=miR8741, target=R03G\_16749, score=0, range=2206-2227, stran  
target 5' CCAUCAUCAUUCAUUCAGGCCA 3'  
::::::::::::::::::::::::::  
query 3' GGUAGUAGUAAGUAAGUCCGGU 5'  
query=miR8741, target=R03G\_13145, score=0, range=2206-2227, stran  
target 5' CCAUCAUCAUUCAUUCAGGCCA 3'  
::::::::::::::::::::::::::  
query 3' GGUAGUAGUAAGUAAGUCCGGU 5'  
query=miR8741, target=R03G\_17257, score=0, range=2122-2143, stran  
target 5' CCAUCAUCAUUCAUUCAGGCCA 3'  
::::::::::::::::::::::::::  
query 3' GGUAGUAGUAAGUAAGUCCGGU 5'  
query=miR8741, target=R03G\_05424, score=0, range=2122-2143, stran  
target 5' CCAUCAUCAUUCAUUCAGGCCA 3'  
::::::::::::::::::::::::::  
query 3' GGUAGUAGUAAGUAAGUCCGGU 5'  
query=miR8741, target=R03G\_15889, score=0, range=2122-2143, stran  
target 5' CCAUCAUCAUUCAUUCAGGCCA 3'  
::::::::::::::::::::::::::  
query 3' GGUAGUAGUAAGUAAGUCCGGU 5'  
query=miR8741, target=R03G\_16136, score=0, range=2122-2143, stran  
target 5' CCAUCAUCAUUCAUUCAGGCCA 3'  
::::::::::::::::::::::::::  
query 3' GGUAGUAGUAAGUAAGUCCGGU 5'  
query=miR8741, target=R03G\_04592, score=0, range=1378-1399, stran  
target 5' CCAUCAUCAUUCAUUCAGGCCA 3'  
::::::::::::::::::::::::::  
query 3' GGUAGUAGUAAGUAAGUCCGGU 5'  
query=miR8741, target=R03G\_09183, score=0, range=1339-1360, stran  
target 5' CCAUCAUCAUUCAUUCAGGCCA 3'  
::::::::::::::::::::::::::  
query 3' GGUAGUAGUAAGUAAGUCCGGU 5'  
query=miR8741, target=R03G\_00289, score=0, range=940-961, strand=  
target 5' CCAUCAUCAUUCAUUCAGGCCA 3'  
::::::::::::::::::::::::::  
query 3' GGUAGUAGUAAGUAAGUCCGGU 5'  
query=miR8741, target=R03G\_17351, score=0, range=934-955, strand=





query 3' AACGAGUGUUGGCAGAAACU 5'  
query=miR4401b, target=R03G\_02233, score=0, range=358-377, strand  
target 5' UUGCUCACAACCGUCUUUGA 3'

query 3' AACGAGUGUUGGCAGAAACU 5'  
query=miR4401b, target=R03G\_12667, score=2, range=199-218, strand  
target 5' UUGCUCACAACCGUCUUGGA 3'

query 3' AACGAGUGUUGGCAGAAACU 5'  
query=miR4401b, target=R03G\_03583, score=2, range=634-653, strand  
target 5' UUGCUCACAACAGUCUUUGA 3'

query 3' AACGAGUGUUGGCAGAAACU 5'  
query=miR4401b, target=R03G\_16714, score=3.5, range=187-206, strand  
target 5' UUGUUGACAACCGUCUUAGA 3'

query 3' AACGAGUGUUGGCAGAAACU 5'  
query=miR4401b, target=R03G\_04116, score=3.5, range=194-213, strand  
target 5' UUGUUGACAACCGUCUUAGA 3'

query 3' AACGAGUGUUGGCAGAAACU 5'  
query=miR4401b, target=R03G\_01079, score=3.5, range=466-486, strand  
target 5' UGGCUCACCAACCGUUUUUGG 3'

query 3' AACGAGU-GUUGGCAGAAACU 5'  
query=miR4401b, target=R03G\_01425, score=3.5, range=1419-1437,  
strand=-1  
target 5' UUUCUU-CAACCGUUUUUGA 3'

query 3' AACGAGUGUUGGCAGAAACU 5'  
query=miR4401b, target=R03G\_03120, score=3.5, range=1419-1437,  
strand=-1  
target 5' UUUCUU-CAACCGUUUUUGA 3'

query 3' AACGAGUGUUGGCAGAAACU 5'  
query=miR4401b, target=R03G\_16566, score=3.5, range=1419-1437,  
strand=-1  
target 5' UUUCUU-CAACCGUUUUUGA 3'

query 3' AACGAGUGUUGGCAGAAACU 5'  
query=miR4401b, target=R03G\_13806, score=3.5, range=1419-1437,  
strand=-1  
target 5' UUUCUU-CAACCGUUUUUGA 3'

```

query 3' AACGAGUGUUGGCAGAAACU 5'
query=miR4401b, target=R03G_14533, score=3.5, range=1224-1242,
strand=-1
target 5' UUUCUU-CAACCGUUUUUGA 3'
:: ::. :::::::::::::::
query 3' AACGAGUGUUGGCAGAAACU 5'
query=miR4401b, target=R03G_08383, score=4, range=281-300, strand
target 5' UUGCUCGCAGCCGUCUUGG 3'
:::::::::::::::::: :.
query 3' AACGAGUGUUGGCAGAAACU 5'
query=miR4401b, target=R03G_12286, score=4, range=242-260, strand
target 5' UUUCUGA-AACCGUCUUUGA 3'
:: :: : :::::::::::::::
query 3' AACGAGUGUUGGCAGAAACU 5'
query=miR4401b, target=R03G_07324, score=4, range=567-586, strand
target 5' UGGCUGCCAAUCGUCUUUGA 3'
: ::: :::::::::::::::
query 3' AACGAGUGUUGGCAGAAACU 5'
query=miR4401b, target=R03G_08428, score=4, range=401-419, strand
target 5' CUUCUCAC-ACCGUCUUUGA 3'
: ::::: :::::::::::::::
query 3' AACGAGUGUUGGCAGAAACU 5'
query=miR4401b, target=R03G_11133, score=4, range=95-113, strand=
target 5' UUGCUC-CAAUAGUCUUUGA 3'
::::: :::. :::::::::::::::
query 3' AACGAGUGUUGGCAGAAACU 5'
query=miR158-3p, target=R03G_02126, score=2, range=520-540, stran
target 5' GCAUUUGUCUACGUUUGGAAA 3'
:: ::::::::::::::::::::
query 3' CG-AAACAGAUGUAAACCUUU 5'
query=miR158-3p, target=R03G_05865, score=4, range=2734-2753, str
target 5' GCUUUGUCUACAUCUGAAAA 3'
:::::::::::::::::: :: :::
query 3' CGAAACAGAUGUAAACCUUU 5'
query=miR158-3p, target=R03G_02707, score=4, range=631-650, stran
target 5' GCUUUGUCUACAUCUGAAAA 3'
:::::::::::::::::: :: :::
query 3' CGAAACAGAUGUAAACCUUU 5'
query=miR158-3p, target=R03G_17446, score=4, range=3082-3101, str
target 5' GCUUUGUCUACAUCUGAAAA 3'
:::::::::::::::::: :: :::
query 3' CGAAACAGAUGUAAACCUUU 5'
query=miR158-3p, target=R03G_15863, score=4, range=10-29, strand=
target 5' GCUUUGUCUACAUCUGAAAA 3'
:::::::::::::::::: :: :::

```



query 3' CGAAACAGAUGUAAACCUUU 5'  
query=miR158-3p, target=R03G\_01733, score=4, range=2884-2903, str  
target 5' GCUUUGUCUACAUCUGAAAA 3'  
..... :: ::  
query 3' CGAAACAGAUGUAAACCUUU 5'  
query=miR158-3p, target=R03G\_11945, score=4, range=10-29, strand=  
target 5' GCUUUGUCUACAUCUGAAAA 3'  
..... :: ::  
query 3' CGAAACAGAUGUAAACCUUU 5'  
query=miR158-3p, target=R03G\_10420, score=4, range=3082-3101, str  
target 5' GCUUUGUCUACAUCUGAAAA 3'  
..... :: ::  
query 3' CGAAACAGAUGUAAACCUUU 5'  
query=miR158-3p, target=R03G\_02966, score=4, range=2353-2372, str  
target 5' GCUUUGUCUACAUCUGAAAA 3'  
..... :: ::  
query 3' CGAAACAGAUGUAAACCUUU 5'  
query=miR158-3p, target=R03G\_10991, score=4, range=3082-3101, str  
target 5' GCUUUGUCUACAUCUGAAAA 3'  
..... :: ::  
query 3' CGAAACAGAUGUAAACCUUU 5'  
query=miR158-3p, target=R03G\_01944, score=4, range=3082-3101, str  
target 5' GCUUUGUCUACAUCUGAAAA 3'  
..... :: ::  
query 3' CGAAACAGAUGUAAACCUUU 5'  
query=miR158-3p, target=R03G\_13849, score=4, range=3082-3101, str  
target 5' GCUUUGUCUACAUCUGAAAA 3'  
..... :: ::  
query 3' CGAAACAGAUGUAAACCUUU 5'  
query=miR158-3p, target=R03G\_06502, score=4, range=2959-2978, str  
target 5' GCUUUGUCUACAUCUGAAAA 3'  
..... :: ::  
query 3' CGAAACAGAUGUAAACCUUU 5'  
query=miR158-3p, target=R03G\_17287, score=4, range=3082-3101, str  
target 5' GCUUUGUCUACAUCUGAAAA 3'  
..... :: ::  
query 3' CGAAACAGAUGUAAACCUUU 5'  
query=miR158-3p, target=R03G\_03749, score=4, range=3082-3101, str  
target 5' GCUUUGUCUACAUCUGAAAA 3'  
..... :: ::  
query 3' CGAAACAGAUGUAAACCUUU 5'  
query=miR158-3p, target=R03G\_15573, score=4, range=3082-3101, str  
target 5' GCUUUGUCUACAUCUGAAAA 3'  
..... :: ::  
query 3' CGAAACAGAUGUAAACCUUU 5'

```

query=miR158-3p, target=R03G_07325, score=4, range=1306-1325, str
target 5' GCUUUGGUUACAUUUGAAAA 3'
: : : : : : : : : : : :
query 3' CGAAACAGAUGUAAACCUUU 5'
query=miR158-3p, target=R03G_09758, score=4, range=3112-3131, str
target 5' GCUUUUGCUACAUUAGGAAA 3'
: : : : : : : : : :
query 3' CGAAACAGAUGUAAACCUUU 5'
query=miR158-3p, target=R03G_06983, score=4, range=895-914, stran
target 5' GCUUGGUCUACAUCUGGAAU 3'
: : : : : : : : : :
query 3' CGAAACAGAUGUAAACCUUU 5'
query=miR158-3p, target=R03G_08644, score=4, range=829-847, stran
target 5' GUGUUG-CUAUAUUUGGAAG 3'
: . : : : : : : : : :
query 3' CGAAACAGAUGUAAACCUUU 5'
query=miR158-3p, target=R03G_17196, score=4, range=215-233, stran
target 5' GCAUUG-CUACAUUUGAAAA 3'
: : : : : : : : : :
query 3' CGAAACAGAUGUAAACCUUU 5'
query=miR1146, target=R03G_06423, score=0, range=518-538, strand=
target 5' AAGACUUCCCGUCGGACCCAA 3'
: : : : : : : : : :
query 3' UUCUGAAGGGCAGCCUGGGUU 5'
query=miR1146, target=R03G_10235, score=0, range=464-484, strand=
target 5' AAGACUUCCCGUCGGACCCAA 3'
: : : : : : : : : :
query 3' UUCUGAAGGGCAGCCUGGGUU 5'
query=miR1146, target=R03G_09483, score=0, range=464-484, strand=
target 5' AAGACUUCCCGUCGGACCCAA 3'
: : : : : : : : : :
query 3' UUCUGAAGGGCAGCCUGGGUU 5'
query=miR1146, target=R03G_06441, score=0, range=464-484, strand=
target 5' AAGACUUCCCGUCGGACCCAA 3'
: : : : : : : : : :
query 3' UUCUGAAGGGCAGCCUGGGUU 5'
query=miR1146, target=R03G_09499, score=0, range=464-484, strand=
target 5' AAGACUUCCCGUCGGACCCAA 3'
: : : : : : : : : :
query 3' UUCUGAAGGGCAGCCUGGGUU 5'
query=miR1146, target=R03G_15675, score=0, range=464-484, strand=
target 5' AAGACUUCCCGUCGGACCCAA 3'
: : : : : : : : : :
query 3' UUCUGAAGGGCAGCCUGGGUU 5'
query=miR1146, target=R03G_11401, score=0, range=464-484, strand=

```



query 3' UUCUGAAGGGCAGCCUGGGUU 5'  
query=miR1146, target=R03G\_17400, score=0, range=338-358, strand=  
target 5' AAGACUUCCCGUCGGACCCAA 3'

query 3' UUCUGAAGGGCAGCCUGGGUU 5'  
query=miR1146, target=R03G\_05915, score=0, range=464-484, strand=  
target 5' AAGACUUCCCGUCGGACCCAA 3'

query 3' UUCUGAAGGGCAGCCUGGGUU 5'  
query=miR1146, target=R03G\_01730, score=0, range=464-484, strand=  
target 5' AAGACUUCCCGUCGGACCCAA 3'

query 3' UUCUGAAGGGCAGCCUGGGUU 5'  
query=miR1146, target=R03G\_13720, score=0, range=341-361, strand=  
target 5' AAGACUUCCCGUCGGACCCAA 3'

query 3' UUCUGAAGGGCAGCCUGGGUU 5'  
query=miR1146, target=R03G\_16897, score=0, range=464-484, strand=  
target 5' AAGACUUCCCGUCGGACCCAA 3'

query 3' UUCUGAAGGGCAGCCUGGGUU 5'  
query=miR1146, target=R03G\_17285, score=0.5, range=464-484, stran  
target 5' AAGGCUUCCCGUCGGACCCAA 3'

query 3' UUCUGAAGGGCAGCCUGGGUU 5'  
query=miR1146, target=R03G\_01652, score=0.5, range=464-484, stran  
target 5' AAGACUUUCCGUCGGACCCAA 3'

query 3' UUCUGAAGGGCAGCCUGGGUU 5'  
query=miR1146, target=R03G\_01956, score=0.5, range=464-484, stran  
target 5' AAGGCUUCCCGUCGGACCCAA 3'

query 3' UUCUGAAGGGCAGCCUGGGUU 5'  
query=miR1146, target=R03G\_08846, score=0.5, range=464-484, stran  
target 5' AAGACUUUCCGUCGGACCCAA 3'

query 3' UUCUGAAGGGCAGCCUGGGUU 5'  
query=miR1146, target=R03G\_03571, score=0.5, range=464-484, stran  
target 5' AAGACUUUCCGUCGGACCCAA 3'

query 3' UUCUGAAGGGCAGCCUGGGUU 5'  
query=miR1146, target=R03G\_05635, score=0.5, range=464-484, stran  
target 5' AAGACUUUCCGUCGGACCCAA 3'

query 3' UUCUGAAGGGCAGCCUGGGUU 5'  
query=miR1146, target=R03G\_13848, score=0.5, range=464-484, stran  
target 5' AAGACUUUCCGUCGGACCCAA 3'  
.....  
query 3' UUCUGAAGGGCAGCCUGGGUU 5'  
query=miR1146, target=R03G\_09607, score=0.5, range=464-484, stran  
target 5' AAGACUUUCCGUCGGACCCAA 3'  
.....  
query 3' UUCUGAAGGGCAGCCUGGGUU 5'  
query=miR1146, target=R03G\_05622, score=0.5, range=464-484, stran  
target 5' AAGACUUUCCGUCGGACCCAA 3'  
.....  
query 3' UUCUGAAGGGCAGCCUGGGUU 5'  
query=miR1146, target=R03G\_13742, score=0.5, range=464-484, stran  
target 5' AAGACUUUCCGUCGGACCCAA 3'  
.....  
query 3' UUCUGAAGGGCAGCCUGGGUU 5'  
query=miR1146, target=R03G\_07704, score=0.5, range=464-484, stran  
target 5' AAGACUUUCCGUCGGACCCAA 3'  
.....  
query 3' UUCUGAAGGGCAGCCUGGGUU 5'  
query=miR1146, target=R03G\_13151, score=1, range=464-484, strand=  
target 5' AAGACUUCCUGUCGGACCCAA 3'  
.....  
query 3' UUCUGAAGGGCAGCCUGGGUU 5'  
query=miR1146, target=R03G\_11773, score=1, range=464-484, strand=  
target 5' AAGAUIIUCCGUCGGACCCAA 3'  
.....  
query 3' UUCUGAAGGGCAGCCUGGGUU 5'  
query=miR1146, target=R03G\_16551, score=1, range=464-484, strand=  
target 5' AAGAUIIUCCGUCGGACCCAA 3'  
.....  
query 3' UUCUGAAGGGCAGCCUGGGUU 5'  
query=miR1146, target=R03G\_16555, score=1, range=464-484, strand=  
target 5' AAGAUIIUCCGUCGGACCCAA 3'  
.....  
query 3' UUCUGAAGGGCAGCCUGGGUU 5'  
query=miR1146, target=R03G\_03615, score=1, range=464-484, strand=  
target 5' AAGUCUCCCCGUCGGACCCAA 3'  
... ..  
query 3' UUCUGAAGGGCAGCCUGGGUU 5'  
query=miR1146, target=R03G\_13726, score=1.5, range=464-484, stran  
target 5' UAGACUUUCCGUCGGACCCAA 3'  
.....  
query 3' UUCUGAAGGGCAGCCUGGGUU 5'

```
query=miR1146, target=R03G_08661, score=2, range=464-484, strand=  
target 5' AAGGCUUUUCGUCGGACCCAA 3'  
.....  
query 3' UUCUGAAGGGCAGCCUGGGUU 5'  
query=miR1146, target=R03G_05699, score=4, range=81-101, strand=1  
target 5' AAGACUUGUUGUUGGACCCAA 3'  
.....  
query 3' UUCUGAAGGGCAGCCUGGGUU 5'  
query=miR5219, target=R03G_04102, score=0, range=292-313, strand=  
target 5' ACGCAGCAGCUGAGAGUCCAGA 3'  
.....  
query 3' UCGGUCGUCGACUCUCAGGUCU 5'  
query=miR5219, target=R03G_17126, score=0, range=320-341, strand=  
target 5' ACGCAGCAGCUGAGAGUCCAGA 3'  
.....  
query 3' UCGGUCGUCGACUCUCAGGUCU 5'  
query=miR5219, target=R03G_09090, score=0, range=290-311, strand=  
target 5' ACGCAGCAGCUGAGAGUCCAGA 3'  
.....  
query 3' UCGGUCGUCGACUCUCAGGUCU 5'  
query=miR5219, target=R03G_07568, score=0, range=193-214, strand=  
target 5' ACGCAGCAGCUGAGAGUCCAGA 3'  
.....  
query 3' UCGGUCGUCGACUCUCAGGUCU 5'  
query=miR5219, target=R03G_02387, score=0.5, range=235-256, stran  
target 5' AUGCAGCAGCUGAGAGUCCAGA 3'  
.....  
query 3' UCGGUCGUCGACUCUCAGGUCU 5'  
query=miR5219, target=R03G_15231, score=1, range=533-554, strand=  
target 5' ACACAGCAGCUGAGAGUCCAGA 3'  
:: .....  
query 3' UCGGUCGUCGACUCUCAGGUCU 5'  
query=miR5219, target=R03G_10585, score=1, range=134-155, strand=  
target 5' ACACAGCAGCUGAGAGUCCAGA 3'  
:: .....  
query 3' UCGGUCGUCGACUCUCAGGUCU 5'  
query=miR5219, target=R03G_08723, score=1, range=197-218, strand=  
target 5' ACGCAGCAGCUGAGAGUCCGGA 3'  
.....  
query 3' UCGGUCGUCGACUCUCAGGUCU 5'  
query=miR5219, target=R03G_08544, score=1.5, range=139-160, stran  
target 5' ACGUAUCAGCUGAGAGUCCAGA 3'  
:::: .....  
query 3' UCGGUCGUCGACUCUCAGGUCU 5'  
query=miR5219, target=R03G_10900, score=2, range=89-110, strand=1
```



query 3' AGGAGGUUGUUGGGGUAACGAU 5'  
query=miR7729a-3p, target=R03G\_12079, score=1, range=73-94, stran  
target 5' UCCUCCAACAACCCCAUUGUUA 3'

query 3' AGGAGGUUGUUGGGGUAACGAU 5'  
query=miR7729a-3p, target=R03G\_12179, score=1, range=73-94, stran  
target 5' UCCUCCAACAACCCCAUUGUUA 3'

query 3' AGGAGGUUGUUGGGGUAACGAU 5'  
query=miR7729a-3p, target=R03G\_13735, score=1, range=73-94, stran  
target 5' UCCUCCAACAACCCCAUUGUUA 3'

query 3' AGGAGGUUGUUGGGGUAACGAU 5'  
query=miR7729a-3p, target=R03G\_04676, score=3, range=73-94, stran  
target 5' UCCUCCAACAACCCAAUUGUUA 3'

query 3' AGGAGGUUGUUGGGGUAACGAU 5'  
query=miR7729a-3p, target=R03G\_07676, score=4, range=73-94, stran  
target 5' UCCCCAACAGCCCUAUUGUUA 3'

query 3' AGGAGGUUGUUGGGGUAACGAU 5'  
query=miR7729a-3p, target=R03G\_01968, score=4, range=73-94, stran  
target 5' UCCCCAACAGCCCUAUUGUUA 3'

query 3' AGGAGGUUGUUGGGGUAACGAU 5'  
query=miR7729a-3p, target=R03G\_07678, score=4, range=73-94, stran  
target 5' UCCCCAACAGCCCUAUUGUUA 3'

query 3' AGGAGGUUGUUGGGGUAACGAU 5'  
query=miR7729a-3p, target=R03G\_07110, score=4, range=73-94, stran  
target 5' UCCCCAACAGCCCUAUUGUUA 3'

query 3' AGGAGGUUGUUGGGGUAACGAU 5'  
query=miR7729a-3p, target=R03G\_17380, score=4, range=73-94, stran  
target 5' UCCCCAACAGCCCUAUUGUUA 3'

query 3' AGGAGGUUGUUGGGGUAACGAU 5'  
query=miR7729a-3p, target=R03G\_01949, score=4, range=73-94, stran  
target 5' UCCCCAACAGCCCUAUUGUUA 3'

query 3' AGGAGGUUGUUGGGGUAACGAU 5'  
query=miR7729a-3p, target=R03G\_03767, score=4, range=73-94, stran  
target 5' UCCCCAACAGCCCUAUUGUUA 3'





query=miR8762d, target=R03G\_07739, score=3, range=484-505, strand  
target 5' AAACAUCGAUCAAAGUUCACAA 3'  
: ::::::::::::::: ::::  
query 3' UCUGUAGCUAGUUUCAA AUGUU 5'  
query=miR8762d, target=R03G\_13852, score=3, range=484-505, strand  
target 5' AAACAUCGAUCAAAGUUCACAA 3'  
: ::::::::::::::: ::::  
query 3' UCUGUAGCUAGUUUCAA AUGUU 5'  
query=miR8762d, target=R03G\_05953, score=4, range=733-754, strand  
target 5' AAACACCGAUCAAAGUCUACAA 3'  
: ::: ::::::::::: :::::  
query 3' UCUGUAGCUAGUUUCAA AUGUU 5'  
query=miR8762d, target=R03G\_17449, score=4, range=733-754, strand  
target 5' AAACACCGAUCAAAGUCUACAA 3'  
: ::: ::::::::::: :::::  
query 3' UCUGUAGCUAGUUUCAA AUGUU 5'  
query=miR8762d, target=R03G\_05921, score=4, range=733-754, strand  
target 5' AAACACCGAUCAAAGUCUACAA 3'  
: ::: ::::::::::: :::::  
query 3' UCUGUAGCUAGUUUCAA AUGUU 5'  
query=miR8762d, target=R03G\_10729, score=4, range=733-754, strand  
target 5' AAACACCGAUCAAAGUCUACAA 3'  
: ::: ::::::::::: :::::  
query 3' UCUGUAGCUAGUUUCAA AUGUU 5'  
query=miR8762d, target=R03G\_11966, score=4, range=733-754, strand  
target 5' AAACACCGAUCAAAGUCUACAA 3'  
: ::: ::::::::::: :::::  
query 3' UCUGUAGCUAGUUUCAA AUGUU 5'  
query=miR8762d, target=R03G\_05939, score=4, range=733-754, strand  
target 5' AAACACCGAUCAAAGUCUACAA 3'  
: ::: ::::::::::: :::::  
query 3' UCUGUAGCUAGUUUCAA AUGUU 5'  
query=miR1051-3p, target=R03G\_06734, score=0, range=443-461, stra  
target 5' GUGGGUUCAAGUACGGGAA 3'  
: ::::::::::::::: :::::  
query 3' CACCCAAGUUCAUGCCCUU 5'  
query=miR1051-3p, target=R03G\_16733, score=0, range=1139-1157,  
strand=1  
target 5' GUGGGUUCAAGUACGGGAA 3'  
: ::::::::::::::: :::::  
query 3' CACCCAAGUUCAUGCCCUU 5'  
query=miR1051-3p, target=R03G\_15270, score=0, range=188-206, stra  
target 5' GUGGGUUCAAGUACGGGAA 3'  
: ::::::::::::::: :::::  
query 3' CACCCAAGUUCAUGCCCUU 5'

```

query=miR1051-3p, target=R03G_09180, score=0, range=1139-1157,
strand=1
target 5' GUGGGUUCAAGUACGGGAA 3'
::::::::::::::::::::
query 3' CACCCAAGUUCAUGCCCUU 5'
query=miR1051-3p, target=R03G_16812, score=0, range=1139-1157,
strand=1
target 5' GUGGGUUCAAGUACGGGAA 3'
::::::::::::::::::::
query 3' CACCCAAGUUCAUGCCCUU 5'
query=miR1051-3p, target=R03G_09189, score=0, range=1139-1157,
strand=1
target 5' GUGGGUUCAAGUACGGGAA 3'
::::::::::::::::::::
query 3' CACCCAAGUUCAUGCCCUU 5'
query=miR1051-3p, target=R03G_14798, score=0, range=1139-1157,
strand=1
target 5' GUGGGUUCAAGUACGGGAA 3'
::::::::::::::::::::
query 3' CACCCAAGUUCAUGCCCUU 5'
query=miR1051-3p, target=R03G_14791, score=0, range=1139-1157,
strand=1
target 5' GUGGGUUCAAGUACGGGAA 3'
::::::::::::::::::::
query 3' CACCCAAGUUCAUGCCCUU 5'
query=miR1051-3p, target=R03G_17260, score=1, range=1018-1036,
strand=1
target 5' GUGGGUUCAAGUAUGGGAA 3'
::::::::::::::::::::
query 3' CACCCAAGUUCAUGCCCUU 5'
query=miR1051-3p, target=R03G_13789, score=4, range=2531-2548,
strand=1
target 5' GUGGG-GCAAGUACGGGAC 3'
::::: ::::::::::::::
query 3' CACCCAAGUUCAUGCCCUU 5'
query=miR1051-3p, target=R03G_09447, score=4, range=110-127, stra
target 5' GU-GGUUCAAGUAUUGGAA 3'
:: ::::::::::::::. ::::
query 3' CACCCAAGUUCAUGCCCUU 5'
query=miR1051-3p, target=R03G_01211, score=4, range=810-827, stra
target 5' GUGGGAUCAA-UACGGGAU 3'
::::: :::: ::::::::::
query 3' CACCCAAGUUCAUGCCCUU 5'
query=miR1216, target=R03G_14801, score=0, range=97-116, strand=1
target 5' GUACAAGCGCUAACCCAUCA 3'

```

query 3' CAUGUUCGCGAUUGGGUAGU 5'  
query=miR1216, target=R03G\_14788, score=0, range=97-116, strand=1  
target 5' GUACAAGCGCUAACCCAUCA 3'

query 3' CAUGUUCGCGAUUGGGUAGU 5'  
query=miR1216, target=R03G\_17261, score=0, range=164-183, strand=  
target 5' GUACAAGCGCUAACCCAUCA 3'

query 3' CAUGUUCGCGAUUGGGUAGU 5'  
query=miR1216, target=R03G\_09190, score=0, range=164-183, strand=  
target 5' GUACAAGCGCUAACCCAUCA 3'

query 3' CAUGUUCGCGAUUGGGUAGU 5'  
query=miR1216, target=R03G\_09181, score=0, range=164-183, strand=  
target 5' GUACAAGCGCUAACCCAUCA 3'

query 3' CAUGUUCGCGAUUGGGUAGU 5'  
query=miR1216, target=R03G\_16732, score=0, range=164-183, strand=  
target 5' GUACAAGCGCUAACCCAUCA 3'

query 3' CAUGUUCGCGAUUGGGUAGU 5'  
query=miR1216, target=R03G\_14792, score=0, range=164-183, strand=  
target 5' GUACAAGCGCUAACCCAUCA 3'

query 3' CAUGUUCGCGAUUGGGUAGU 5'  
query=miR1216, target=R03G\_14799, score=0, range=164-183, strand=  
target 5' GUACAAGCGCUAACCCAUCA 3'

query 3' CAUGUUCGCGAUUGGGUAGU 5'  
query=miR1216, target=R03G\_16813, score=0, range=164-183, strand=  
target 5' GUACAAGCGCUAACCCAUCA 3'

query 3' CAUGUUCGCGAUUGGGUAGU 5'  
query=miR1216, target=R03G\_09818, score=4, range=432-452, strand=  
target 5' GUACGAGUGGCUAACCUAUCA 3'

query 3' CAUGUUCG-CGAUUGGGUAGU 5'  
query=miR1216, target=R03G\_13574, score=4, range=219-237, strand=  
target 5' GUAAAAGCGC-AACUCAUCA 3'

query 3' CAUGUUCGCGAUUGGGUAGU 5'  
query=miR2612, target=R03G\_13221, score=0, range=767-787, strand=  
target 5' CUGAUACUACUGCCACUAUCA 3'

query 3' GACUAUGAUGACGGUGAUAGU 5'  
query=miR2612, target=R03G\_04123, score=1, range=767-787, strand=  
target 5' CUGAUACCACUGCCACUAUCA 3'  
.....  
query 3' GACUAUGAUGACGGUGAUAGU 5'  
query=miR2612, target=R03G\_04120, score=1, range=767-787, strand=  
target 5' CUGAUACCACUGCCACUAUCA 3'  
.....  
query 3' GACUAUGAUGACGGUGAUAGU 5'  
query=miR2612, target=R03G\_13224, score=1, range=767-787, strand=  
target 5' CUGAUACCACUGCCACUAUCA 3'  
.....  
query 3' GACUAUGAUGACGGUGAUAGU 5'  
query=miR2612, target=R03G\_17093, score=1, range=527-547, strand=  
target 5' CUGAUACCACUGCCACUAUCA 3'  
.....  
query 3' GACUAUGAUGACGGUGAUAGU 5'  
query=miR2612, target=R03G\_11597, score=2.5, range=895-916, stran  
target 5' UUGAUCACUACUGCCAUUAUCA 3'  
. ....  
query 3' GACUA-UGAUGACGGUGAUAGU 5'  
query=miR2612, target=R03G\_01516, score=3, range=2025-2045, stran  
target 5' UUGAUGCUGCUGCUACUAUCA 3'  
.....  
query 3' GACUAUGAUGACGGUGAUAGU 5'  
query=miR2612, target=R03G\_02911, score=3.5, range=113-133, stran  
target 5' CUGAUGAUACUGCUGCUAUCA 3'  
.....  
query 3' GACUAUGAUGACGGUGAUAGU 5'  
query=miR2612, target=R03G\_03005, score=3.5, range=107-127, stran  
target 5' UUGUUAUUACUGCCACUAUUG 3'  
... ..  
query 3' GACUAUGAUGACGGUGAUAGU 5'  
query=miR2612, target=R03G\_08542, score=3.5, range=237-256, stran  
target 5' CUG-UGCUACUUCCACUAUCA 3'  
... ..  
query 3' GACUAUGAUGACGGUGAUAGU 5'  
query=miR2612, target=R03G\_02624, score=3.5, range=315-334, stran  
target 5' UUGAUAC-ACUGCCGUUAUCA 3'  
.....  
query 3' GACUAUGAUGACGGUGAUAGU 5'  
query=miR2612, target=R03G\_08172, score=4, range=605-625, strand=  
target 5' AUGAUACUAUUGCUGCUAUCA 3'  
.....  
query 3' GACUAUGAUGACGGUGAUAGU 5'

query=miR2612, target=R03G\_02915, score=4, range=901-922, strand=  
target 5' GUGAUAACUACUGCCAUGUCA 3'  
:::: :  
query 3' GACUA-UGAUGACGGUGAUAGU 5'  
query=miR2612, target=R03G\_01852, score=4, range=164-183, strand=  
target 5' CUGCUACUACUGCUACU-UCA 3'  
::: :  
query 3' GACUAUGAUGACGGUGAUAGU 5'  
query=miR2612, target=R03G\_04617, score=4, range=675-694, strand=  
target 5' CUUUUACUACUGCCAC-AUCA 3'  
:: :  
query 3' GACUAUGAUGACGGUGAUAGU 5'  
query=miR6476a, target=R03G\_03666, score=4, range=110-128, strand  
target 5' UCAU-UUCAUUACUUGCCGA 3'  
:::: :  
query 3' AGUACAAGUAGUGGAUGGCU 5'  
query=miR6476a, target=R03G\_04527, score=4, range=780-799, strand  
target 5' UGAUGAUCAUCAUCUACUGA 3'  
: ::: :  
query 3' AGUACAAGUAGUGGAUGGCU 5'  
query=miR6476a, target=R03G\_05448, score=4, range=1076-1094, stra  
target 5' UCAUGGUCAUCACCU-CUGA 3'  
::::: :  
query 3' AGUACAAGUAGUGGAUGGCU 5'  
query=miR6476a, target=R03G\_10979, score=4, range=962-980, strand  
target 5' UCAAG-GCAUCACCUACUGA 3'  
::: :  
query 3' AGUACAAGUAGUGGAUGGCU 5'  
query=miR6476a, target=R03G\_00932, score=4, range=124-142, strand  
target 5' UCGUG-UCAUCAUCUACUGG 3'  
::::: :  
query 3' AGUACAAGUAGUGGAUGGCU 5'  
query=miR1446, target=R03G\_12063, score=0, range=814-835, strand=  
target 5' AUGAUGCGCAGAGAUUUCAGAA 3'  
::::: :  
query 3' UACUACGCGUCUCUAAAGUCUU 5'  
query=miR1446, target=R03G\_03622, score=0, range=1048-1069, stran  
target 5' AUGAUGCGCAGAGAUUUCAGAA 3'  
::::: :  
query 3' UACUACGCGUCUCUAAAGUCUU 5'  
query=miR1446, target=R03G\_12187, score=0, range=1318-1339, stran  
target 5' AUGAUGCGCAGAGAUUUCAGAA 3'  
::::: :  
query 3' UACUACGCGUCUCUAAAGUCUU 5'  
query=miR1446, target=R03G\_14986, score=0, range=1318-1339, stran

```
target 5' AUGAUGCGCAGAGAUUUCAGAA 3'
::::::::::::::::::::::::::
query 3' UACUACGCGUCUCUAAAAGUCUU 5'
query=miR1446, target=R03G_07714, score=0, range=1120-1141, stran
target 5' AUGAUGCGCAGAGAUUUCAGAA 3'
::::::::::::::::::::::::::
query 3' UACUACGCGUCUCUAAAAGUCUU 5'
query=miR1446, target=R03G_04206, score=0, range=367-388, strand=
target 5' AUGAUGCGCAGAGAUUUCAGAA 3'
::::::::::::::::::::::::::
query 3' UACUACGCGUCUCUAAAAGUCUU 5'
query=miR1446, target=R03G_13835, score=4, range=13844-13866, str
target 5' AUGCUGAACAAAGAGAUUUCAGAA 3'
::: : : : ::::::::::::::::::::
query 3' UACUACGCG-UCUCUAAAAGUCUU 5'
query=miR1446, target=R03G_02903, score=4, range=318-339, strand=
target 5' UUGAAGCGCAGAGAGUUCAGAA 3'
::: ::::::::::: ::::::::::
query 3' UACUACGCGUCUCUAAAAGUCUU 5'
query=miR1446, target=R03G_01098, score=4, range=108-128, strand=
target 5' GAA AUG-GUAGAGAUUUCAGAA 3'
. ::: ::::::::::::::::::::
query 3' UACUACGCGUCUCUAAAAGUCUU 5'
query=miR5021, target=R03G_00301, score=0, range=2541-2560, stran
target 5' UUUUCCUUCUUCUAUCGUCA 3'
::::::::::::::::::::::::::
query 3' AAAAGGAAGAAGAUAGCAGU 5'
query=miR5021, target=R03G_04050, score=0, range=1257-1276, stran
target 5' UUUUCCUUCUUCUAUCGUCA 3'
::::::::::::::::::::::::::
query 3' AAAAGGAAGAAGAUAGCAGU 5'
query=miR5021, target=R03G_12949, score=0, range=702-721, strand=
target 5' UUUUCCUUCUUCUAUCGUCA 3'
::::::::::::::::::::::::::
query 3' AAAAGGAAGAAGAUAGCAGU 5'
query=miR5021, target=R03G_06744, score=3, range=972-992, strand=
target 5' UUUUCCUUCUUUCAUCGUCA 3'
::::::::::::::::::: ::::::::::
query 3' AAAAGGAAGAAGA-UAGCAGU 5'
query=miR5021, target=R03G_14233, score=3.5, range=1104-1124, str
target 5' UUUUCCUUCUUCUAUUGAUCG 3'
::::::::::::::::::: : :
query 3' AAAAGGAAGAAGAUAGC-AGU 5'
query=miR5021, target=R03G_00801, score=3.5, range=857-876, stran
target 5' UUUUCUUCUUCAGUCGUCA 3'
```

query 3' AAAAGGAAGAAGAUAGCAGU 5'  
query=miR5021, target=R03G\_09998, score=3.5, range=132-151, stran  
target 5' UUUUUCUUCUUCUGUCUUCA 3'  
query 3' AAAAGGAAGAAGAUAGCAGU 5'  
query=miR5021, target=R03G\_15993, score=3.5, range=162-181, stran  
target 5' UAUUCUUCUUCUUUAUUGUCA 3'  
query 3' AAAAGGAAGAAGAUAGCAGU 5'  
query=miR5021, target=R03G\_06767, score=3.5, range=2738-2757,  
strand=-1  
target 5' UUCUUCUUCUUCUAUUGUCU 3'  
query 3' AAAAGGAAGAAGAUAGCAGU 5'  
query=miR5021, target=R03G\_16410, score=3.5, range=890-909, stran  
target 5' UUCUUCUUCUUUAUCGUCU 3'  
query 3' AAAAGGAAGAAGAUAGCAGU 5'  
query=miR5021, target=R03G\_03413, score=3.5, range=590-609, stran  
target 5' UCUUCUUCUUCUAUCGUUU 3'  
query 3' AAAAGGAAGAAGAUAGCAGU 5'  
query=miR5021, target=R03G\_04712, score=3.5, range=74-93, strand=  
target 5' UAUUCUUCUUCUGUCGUCA 3'  
query 3' AAAAGGAAGAAGAUAGCAGU 5'  
query=miR5021, target=R03G\_08238, score=3.5, range=992-1011, stra  
target 5' UUGCUCUUCUUCUGUCGUCA 3'  
query 3' AAAAGGAAGAAGAUAGCAGU 5'  
query=miR5021, target=R03G\_14008, score=3.5, range=792-810, stran  
target 5' CUUUUCUUCUUC-AUCGUCA 3'  
query 3' AAAAGGAAGAAGAUAGCAGU 5'  
query=miR5021, target=R03G\_13112, score=3.5, range=1851-1869,  
strand=-1  
target 5' UUCUUCUUCUUCUA-CGUCA 3'  
query 3' AAAAGGAAGAAGAUAGCAGU 5'  
query=miR5021, target=R03G\_10608, score=3.5, range=9639-9659,  
strand=-1  
target 5' AUUUCUUCUUCUUAUCGUCA 3'  
query 3' AAAAGGAAGAAG-AUAGCAGU 5'



query=miR5021, target=R03G\_06189, score=3.5, range=87-105, strand  
target 5' UUGUUCUUCUUC-AUCGUCA 3'  
:: :.:.:.:.:.:.:.:.:.:.: :.:.:.:.:.:.:.:.:.:.:  
query 3' AAAAGGAAGAAGAUAGCAGU 5'  
query=miR5021, target=R03G\_10250, score=4, range=237-256, strand=  
target 5' UUUUCCUUCUUCUCCAUGUCA 3'  
:.:.:.:.:.:.:.:.:.:.: :.:.:.:.:.:.:.:.:.:.:  
query 3' AAAAGGAAGAAGAUAGCAGU 5'  
query=miR5021, target=R03G\_03019, score=4, range=209-228, strand=  
target 5' AUUUUUUUCUUCUGUUGUCA 3'  
:.:.:.:.:.:.:.:.:.:.: :.:.:.:.:.:.:.:.:.:.:  
query 3' AAAAGGAAGAAGAUAGCAGU 5'  
query=miR5021, target=R03G\_12821, score=4, range=812-831, strand=  
target 5' UCUUACUUUUUCUGUCGUCA 3'  
: :.:.:.:.:.:.:.:.:.: :.:.:.:.:.:.:.:.:.:.:  
query 3' AAAAGGAAGAAGAUAGCAGU 5'  
query=miR5021, target=R03G\_09002, score=4, range=881-900, strand=  
target 5' AUUACCUUCUUCUCAAUCGUCA 3'  
: :.:.:.:.:.:.:.:.:.: :.:.:.:.:.:.:.:.:.:.:  
query 3' AAAAGGAAGAAGAUAGCAGU 5'  
query=miR5021, target=R03G\_13930, score=4, range=338-356, strand=  
target 5' UCUUCUUUCUU-UAUCGUCG 3'  
: :.:.:.:.:.:.:.:.:.: :.:.:.:.:.:.:.:.:.:.:  
query 3' AAAAGGAAGAAGAUAGCAGU 5'  
query=miR5021, target=R03G\_07645, score=4, range=494-513, strand=  
target 5' CUUGACUUCUUCUUAUCGUCU 3'  
: :.:.:.:.:.:.:.:.:.: :.:.:.:.:.:.:.:.:.:.:  
query 3' AAAAGGAAGAAGAUAGCAGU 5'  
query=miR5021, target=R03G\_03189, score=4, range=365-385, strand=  
target 5' AAUUCACAUCUUCUUAUCGUCA 3'  
: :.:.:.:.:.:.:.:.:.: :.:.:.:.:.:.:.:.:.:.:  
query 3' AAAAG-GAAGAAGAUAGCAGU 5'  
query=miR5021, target=R03G\_09319, score=4, range=558-576, strand=  
target 5' UUCUACUUCUUCUUAU-GUCA 3'  
: :.:.:.:.:.:.:.:.:.: :.:.:.:.:.:.:.:.:.:.:  
query 3' AAAAGGAAGAAGAUAGCAGU 5'  
query=miR6025e, target=R03G\_16742, score=0, range=601-622, strand  
target 5' GCAUGUCAGAUCUAUAAUGGCA 3'  
:.:.:.:.:.:.:.:.:.:.: :.:.:.:.:.:.:.:.:.:.:  
query 3' CGUACAGUCUAGAUUUUACCGU 5'  
query=miR6025e, target=R03G\_02824, score=0, range=601-622, strand  
target 5' GCAUGUCAGAUCUAUAAUGGCA 3'  
:.:.:.:.:.:.:.:.:.:.: :.:.:.:.:.:.:.:.:.:.:  
query 3' CGUACAGUCUAGAUUUUACCGU 5'  
query=miR6025e, target=R03G\_17416, score=0, range=601-622, strand

```
target 5' GCAUGUCAGAUCUAUAAUGGCA 3'
:
query 3' CGUACAGUCUAGAUUUUACCGU 5'
query=miR6025e, target=R03G_17291, score=0, range=601-622, strand
target 5' GCAUGUCAGAUCUAUAAUGGCA 3'
:
query 3' CGUACAGUCUAGAUUUUACCGU 5'
query=miR6025e, target=R03G_13714, score=0, range=601-622, strand
target 5' GCAUGUCAGAUCUAUAAUGGCA 3'
:
query 3' CGUACAGUCUAGAUUUUACCGU 5'
query=miR6025e, target=R03G_16372, score=0, range=601-622, strand
target 5' GCAUGUCAGAUCUAUAAUGGCA 3'
:
query 3' CGUACAGUCUAGAUUUUACCGU 5'
query=miR6025e, target=R03G_17355, score=0, range=436-457, strand
target 5' GCAUGUCAGAUCUAUAAUGGCA 3'
:
query 3' CGUACAGUCUAGAUUUUACCGU 5'
query=miR6025e, target=R03G_01962, score=0, range=352-373, strand
target 5' GCAUGUCAGAUCUAUAAUGGCA 3'
:
query 3' CGUACAGUCUAGAUUUUACCGU 5'
query=miR6025e, target=R03G_16706, score=0, range=325-346, strand
target 5' GCAUGUCAGAUCUAUAAUGGCA 3'
:
query 3' CGUACAGUCUAGAUUUUACCGU 5'
query=miR6025e, target=R03G_09193, score=0, range=325-346, strand
target 5' GCAUGUCAGAUCUAUAAUGGCA 3'
:
query 3' CGUACAGUCUAGAUUUUACCGU 5'
query=miR6025e, target=R03G_17223, score=0, range=325-346, strand
target 5' GCAUGUCAGAUCUAUAAUGGCA 3'
:
query 3' CGUACAGUCUAGAUUUUACCGU 5'
query=miR6025e, target=R03G_04682, score=0, range=601-622, strand
target 5' GCAUGUCAGAUCUAUAAUGGCA 3'
:
query 3' CGUACAGUCUAGAUUUUACCGU 5'
query=miR6025e, target=R03G_05640, score=1, range=496-517, strand
target 5' GCAUGUCAGAUCUAUGAUGGCA 3'
:
query 3' CGUACAGUCUAGAUUUUACCGU 5'
query=miR6025e, target=R03G_07705, score=1, range=601-622, strand
target 5' GCAUGUCAGAUCUAUAAUGGUA 3'
```

query 3' CGUACAGUCUAGAUUUUACCGU 5'  
query=miR6025e, target=R03G\_17387, score=1, range=601-622, strand  
target 5' GCAUGUCAGAUCUAUGAUGGCA 3'

query 3' CGUACAGUCUAGAUUUUACCGU 5'  
query=miR6025e, target=R03G\_16123, score=1, range=601-622, strand  
target 5' GCAUGUCAGAUCUAUGAUGGCA 3'

query 3' CGUACAGUCUAGAUUUUACCGU 5'  
query=miR6025e, target=R03G\_06717, score=1, range=601-622, strand  
target 5' GCAUGUCAGAUCUAUGAUGGCA 3'

query 3' CGUACAGUCUAGAUUUUACCGU 5'  
query=miR6025e, target=R03G\_07137, score=1, range=601-622, strand  
target 5' GCAUGUCAGAUCUAUGAUGGCA 3'

query 3' CGUACAGUCUAGAUUUUACCGU 5'  
query=miR6025e, target=R03G\_01328, score=1, range=601-622, strand  
target 5' GCAUGUCAGAUCUAUGAUGGCA 3'

query 3' CGUACAGUCUAGAUUUUACCGU 5'  
query=miR6025e, target=R03G\_05268, score=1, range=601-622, strand  
target 5' GCAUGUCAGAUCUAUGAUGGCA 3'

query 3' CGUACAGUCUAGAUUUUACCGU 5'  
query=miR6025e, target=R03G\_04674, score=1, range=352-373, strand  
target 5' GCAUGUCAGAUCUAUGAUGGCA 3'

query 3' CGUACAGUCUAGAUUUUACCGU 5'  
query=miR6025e, target=R03G\_14770, score=1, range=601-622, strand  
target 5' GCAUGUCAGAUCUAUAAUGGUA 3'

query 3' CGUACAGUCUAGAUUUUACCGU 5'  
query=miR6025e, target=R03G\_11781, score=1, range=496-517, strand  
target 5' GCAUGUCAGAUCUAUAAUGGUA 3'

query 3' CGUACAGUCUAGAUUUUACCGU 5'  
query=miR6025e, target=R03G\_07702, score=1, range=352-373, strand  
target 5' GCAUGUCAGAUCUAUAAUGGUA 3'

query 3' CGUACAGUCUAGAUUUUACCGU 5'  
query=miR6025e, target=R03G\_16420, score=1, range=352-373, strand  
target 5' GCAUGUCAGAUCUAUAAUGGUA 3'

query 3' CGUACAGUCUAGAUUUACCGU 5'  
query=miR6025e, target=R03G\_15282, score=1, range=325-346, strand  
target 5' GCAUGUCAGAUCUAUAAUGGUA 3'  
.....:  
query 3' CGUACAGUCUAGAUUUACCGU 5'  
query=miR6025e, target=R03G\_15261, score=1, range=601-622, strand  
target 5' GCAUGUCAGAUCUAUGAUGGCA 3'  
.....:  
query 3' CGUACAGUCUAGAUUUACCGU 5'  
query=miR6025e, target=R03G\_10795, score=1, range=601-622, strand  
target 5' GCAUGUCAGAUCUAUAAUGGUA 3'  
.....:  
query 3' CGUACAGUCUAGAUUUACCGU 5'  
query=miR6025e, target=R03G\_17017, score=1, range=601-622, strand  
target 5' GCAUGUCAGAUCUAUAAUGGUA 3'  
.....:  
query 3' CGUACAGUCUAGAUUUACCGU 5'  
query=miR6025e, target=R03G\_04695, score=1, range=391-412, strand  
target 5' GCAUGUCAGAUCUAUGAUGGCA 3'  
.....:  
query 3' CGUACAGUCUAGAUUUACCGU 5'  
query=miR6025e, target=R03G\_07867, score=1, range=352-373, strand  
target 5' GCAUGUCAGAUCUAUGAUGGCA 3'  
.....:  
query 3' CGUACAGUCUAGAUUUACCGU 5'  
query=miR6025e, target=R03G\_11235, score=1, range=496-517, strand  
target 5' GCAUGUCAGAUCUAUAAUGGUA 3'  
.....:  
query 3' CGUACAGUCUAGAUUUACCGU 5'  
query=miR6025e, target=R03G\_06735, score=1, range=325-346, strand  
target 5' GCAUGUCAGAUCUAUAAUGGUA 3'  
.....:  
query 3' CGUACAGUCUAGAUUUACCGU 5'  
query=miR6025e, target=R03G\_14555, score=1, range=229-250, strand  
target 5' GCAUGUCAGAUCUAUAAUGGUA 3'  
.....:  
query 3' CGUACAGUCUAGAUUUACCGU 5'  
query=miR6025e, target=R03G\_06417, score=1, range=229-250, strand  
target 5' GCAUGUCAGAUCUAUAAUGGUA 3'  
.....:  
query 3' CGUACAGUCUAGAUUUACCGU 5'  
query=miR6025e, target=R03G\_14786, score=1, range=229-250, strand  
target 5' GCAUGUCAGAUCUAUAAUGGUA 3'  
.....:  
query 3' CGUACAGUCUAGAUUUACCGU 5'

```

query=miR6025e, target=R03G_15271, score=2, range=601-622, strand
target 5' GCAUGUCAGAUCUAUGAUGGUA 3'
:::::::::::::::::::::::::::
query 3' CGUACAGUCUAGAUUUACCGU 5'
query=miR6025e, target=R03G_07739, score=2, range=352-373, strand
target 5' GCAUGUCAGAUCUAUGAUGGUA 3'
:::::::::::::::::::::::::::
query 3' CGUACAGUCUAGAUUUACCGU 5'
query=miR6025e, target=R03G_16725, score=2, range=343-364, strand
target 5' GCAUGUCAGAUCUAUGAUGGUA 3'
:::::::::::::::::::::::::::
query 3' CGUACAGUCUAGAUUUACCGU 5'
query=miR6025e, target=R03G_06433, score=2, range=325-346, strand
target 5' GCAUGUCAGAUUUUAAAUGGUA 3'
:::::::::::::::::::::::::::
query 3' CGUACAGUCUAGAUUUACCGU 5'
query=miR6025e, target=R03G_10779, score=2, range=217-238, strand
target 5' GCAUGUCAGAUUUUAAAUGGUA 3'
:::::::::::::::::::::::::::
query 3' CGUACAGUCUAGAUUUACCGU 5'
query=miR6025e, target=R03G_17277, score=2, range=85-106, strand=
target 5' GCAUGUCAGAUUUUAAAUGGUA 3'
:::::::::::::::::::::::::::
query 3' CGUACAGUCUAGAUUUACCGU 5'
query=miR6025e, target=R03G_05632, score=2, range=286-307, strand
target 5' GCAUGUCAGAUCUAUAAAUGGGA 3'
:::::::::::::::::::::::::::
query 3' CGUACAGUCUAGAUUUACCGU 5'
query=miR6025e, target=R03G_03591, score=2.5, range=217-238, stra
target 5' GCAUGUCGGAUUUAAAUGGUA 3'
:::::::::::::::::::::::::::
query 3' CGUACAGUCUAGAUUUACCGU 5'
query=miR6025e, target=R03G_10771, score=3, range=352-373, strand
target 5' ACAUGUCAGAUCUAUGAUGGUA 3'
:::::::::::::::::::::::::::
query 3' CGUACAGUCUAGAUUUACCGU 5'
query=miR6025e, target=R03G_13852, score=3, range=352-373, strand
target 5' ACAUGUCAGAUCUAUGAUGGUA 3'
:::::::::::::::::::::::::::
query 3' CGUACAGUCUAGAUUUACCGU 5'
query=miR6025e, target=R03G_04207, score=3, range=601-622, strand
target 5' GCAUGUCAGAUUAUGAUGGCA 3'
::::::::::::: :::::::::::::::
query 3' CGUACAGUCUAGAUUUACCGU 5'
query=miR6025e, target=R03G_17449, score=3, range=601-622, strand

```



query 3' CGUACAGUCUAGAUUUUACCGU 5'  
query=miR6025e, target=R03G\_04210, score=4, range=601-622, strand  
target 5' GCAUGUCAGGUGUAUGAUGGCA 3'

query 3' CGUACAGUCUAGAUUUUACCGU 5'  
query=miR6025e, target=R03G\_10773, score=4, range=601-622, strand  
target 5' GCAUGUCAGGUGUAUGAUGGCA 3'

query 3' CGUACAGUCUAGAUUUUACCGU 5'  
query=miR6025e, target=R03G\_10780, score=4, range=601-622, strand  
target 5' GCAUGUCAGGUGUAUGAUGGCA 3'

query 3' CGUACAGUCUAGAUUUUACCGU 5'  
query=miR6025e, target=R03G\_14568, score=4, range=601-622, strand  
target 5' GCAUGUCAGGUAUAUGAUGGCA 3'

query 3' CGUACAGUCUAGAUUUUACCGU 5'  
query=miR6025e, target=R03G\_10729, score=4, range=601-622, strand  
target 5' GCAUGUCAGGUAUAUGAUGGCA 3'

query 3' CGUACAGUCUAGAUUUUACCGU 5'  
query=miR6025e, target=R03G\_12663, score=4, range=436-457, strand  
target 5' GCAUGUCAGACUUAUGAUGGCA 3'

query 3' CGUACAGUCUAGAUUUUACCGU 5'  
query=miR6025e, target=R03G\_10798, score=4, range=601-622, strand  
target 5' GCAUGUCAGGUAUAUGAUGGCA 3'

query 3' CGUACAGUCUAGAUUUUACCGU 5'  
query=miR6025e, target=R03G\_17214, score=4, range=601-622, strand  
target 5' GCAUGUCAGGUGUAUGAUGGCA 3'

query 3' CGUACAGUCUAGAUUUUACCGU 5'  
query=miR6025e, target=R03G\_04117, score=4, range=496-517, strand  
target 5' GCAUGUCAGACCUAUGAUGGUA 3'

query 3' CGUACAGUCUAGAUUUUACCGU 5'  
query=miR6025e, target=R03G\_15866, score=4, range=325-346, strand  
target 5' GCAUGUCAGGUGUAUGAUGGCA 3'

query 3' CGUACAGUCUAGAUUUUACCGU 5'  
query=miR6025e, target=R03G\_05267, score=4, range=601-622, strand  
target 5' GCCUGUCAGAUUAUGAUGGCA 3'

query 3' CGUACAGUCUAGAUUUACCGU 5'  
query=miR6025e, target=R03G\_09967, score=4, range=601-622, strand  
target 5' GCCUGUCAGAUUAUGAUGGCA 3'  
:: .....  
query 3' CGUACAGUCUAGAUUUACCGU 5'  
query=miR6025e, target=R03G\_07860, score=4, range=601-622, strand  
target 5' GCCUGUCAGAUUAUGAUGGCA 3'  
:: .....  
query 3' CGUACAGUCUAGAUUUACCGU 5'  
query=miR6025e, target=R03G\_00256, score=4, range=601-622, strand  
target 5' GCCUGUCAGAUUAUGAUGGCA 3'  
:: .....  
query 3' CGUACAGUCUAGAUUUACCGU 5'  
query=miR6025e, target=R03G\_05959, score=4, range=601-622, strand  
target 5' GCCUGUCAGAUUAUGAUGGCA 3'  
:: .....  
query 3' CGUACAGUCUAGAUUUACCGU 5'  
query=miR6025e, target=R03G\_09194, score=4, range=601-622, strand  
target 5' GCCUGUCAGAUUAUGAUGGCA 3'  
:: .....  
query 3' CGUACAGUCUAGAUUUACCGU 5'  
query=miR6025e, target=R03G\_11966, score=4, range=601-622, strand  
target 5' GCCUGUCAGAUUAUGAUGGCA 3'  
:: .....  
query 3' CGUACAGUCUAGAUUUACCGU 5'  
query=miR319f, target=R03G\_04030, score=1, range=1106-1126, stran  
target 5' AAGCAUGCCCUUUUCAUCCAA 3'  
.....  
query 3' UUCGUACGGGGAAAGUAGGUU 5'  
query=miR319f, target=R03G\_12114, score=2.5, range=169-190, stran  
target 5' GAGCAUGUCCUCUUUCAUCCAA 3'  
.....  
query 3' UUCGUAC-GGGGAAAGUAGGUU 5'  
query=miR319f, target=R03G\_13957, score=3.5, range=394-415, stran  
target 5' AAGCAAUCUCUCUUUCAUCCAA 3'  
:::: :: .....  
query 3' UUCG-UACGGGGAAAGUAGGUU 5'  
query=miR319f, target=R03G\_01412, score=4, range=79-98, strand=1  
target 5' AAGGAU-CCCUUUUCAUCCGA 3'  
::: :: .....  
query 3' UUCGUACGGGGAAAGUAGGUU 5'  
query=miR319f, target=R03G\_12773, score=4, range=259-279, strand=  
target 5' AGGCCUGUCCUUUCAUCCAC 3'  
::: :: .....  
query 3' UUCGUACGGGGAAAGUAGGUU 5'





```

target 5' UCUUA-UACAACAAAUCAA 3'
: .:: :
query 3' ACGAUGAUGUUGUUUUAGUU 5'
query=miR2868, target=R03G_01909, score=3, range=795-814, strand=
target 5' AGCUGCUACAGCAAAAUCAG 3'
:::::
query 3' ACGAUGAUGUUGUUUUAGUU 5'
query=miR2868, target=R03G_03130, score=3, range=909-928, strand=
target 5' UGCUUCUACAAUGAAAUCAA 3'
:::: :
query 3' ACGAUGAUGUUGUUUUAGUU 5'
query=miR2868, target=R03G_11701, score=3, range=1224-1242, stran
target 5' UGCUACUGCAACAAA-CAA 3'
::::: :
query 3' ACGAUGAUGUUGUUUUAGUU 5'
query=miR2868, target=R03G_15707, score=3, range=2952-2970, stran
target 5' UGC-AGAACAACAAAUCAA 3'
::: :
query 3' ACGAUGAUGUUGUUUUAGUU 5'
query=miR2868, target=R03G_10856, score=3.5, range=641-660, stran
target 5' UGCUAUUACAGCAAAAUGAA 3'
::::: :
query 3' ACGAUGAUGUUGUUUUAGUU 5'
query=miR2868, target=R03G_00028, score=3.5, range=771-791, stran
target 5' UGCUUGCACAACAAAUCCA 3'
::: :
query 3' ACG-AUGAUGUUGUUUUAGUU 5'
query=miR2868, target=R03G_01651, score=3.5, range=239-258, stran
target 5' AACUCUUACAACAAAUCAA 3'
:: .:
query 3' ACGAUGAUGUUGUUUUAGUU 5'
query=miR2868, target=R03G_16465, score=3.5, range=2071-2090, str
target 5' AGUCUCUACAACAAAUCAA 3'
:. :
query 3' ACGAUGAUGUUGUUUUAGUU 5'
query=miR2868, target=R03G_08992, score=3.5, range=668-686, stran
target 5' UGC-AUUACAACAAAACAA 3'
::: :
query 3' ACGAUGAUGUUGUUUUAGUU 5'
query=miR2868, target=R03G_08603, score=3.5, range=438-456, stran
target 5' UGC-AGUACAACGAAAUCAG 3'
::: :
query 3' ACGAUGAUGUUGUUUUAGUU 5'
query=miR2868, target=R03G_12444, score=3.5, range=498-518, stran
target 5' UGCAGCAGACAACAAAUCAA 3'

```

```

::: .: :::::::::::::::
query 3' ACGAUG-AUGUUGUUUUAGUU 5'
query=miR2868, target=R03G_03905, score=3.5, range=1874-1892,
strand=-1
target 5' UG-UGCUACAACAAGAUCGA 3'
:: :::::::::::::::
query 3' ACGAUGAUGUUGUUUUAGUU 5'
query=miR2868, target=R03G_11177, score=3.5, range=1073-1091,
strand=-1
target 5' UGC-AUUUAUAAUAAAUCAA 3'
::: :::::::::::::::
query 3' ACGAUGAUGUUGUUUUAGUU 5'
query=miR2868, target=R03G_04878, score=3.5, range=1004-1023,
strand=-1
target 5' UUCUUUUACAGCAAAAUCAA 3'
: :: :::::::::::::::
query 3' ACGAUGAUGUUGUUUUAGUU 5'
query=miR2868, target=R03G_07279, score=4, range=3150-3169, stran
target 5' UGCUACUAUAACAGAAACAA 3'
::::::::::::: :::
query 3' ACGAUGAUGUUGUUUUAGUU 5'
query=miR2868, target=R03G_04479, score=4, range=530-549, strand=
target 5' UGUUAUUACACCAGAAUCAA 3'
::::::::::::: :::::::::::::::
query 3' ACGAUGAUGUUGUUUUAGUU 5'
query=miR2868, target=R03G_00451, score=4, range=279-298, strand=
target 5' AGCUACAACAUAAGAUCAA 3'
::::: :::::::::::::::
query 3' ACGAUGAUGUUGUUUUAGUU 5'
query=miR2868, target=R03G_11324, score=4, range=132-151, strand=
target 5' UGCUUUACAACAAAACCAC 3'
::::::::::::: ::
query 3' ACGAUGAUGUUGUUUUAGUU 5'
query=miR2868, target=R03G_04175, score=4, range=3378-3397, stran
target 5' UGUUGCCACAACAGAAUCAU 3'
::::: :::::::::::::::
query 3' ACGAUGAUGUUGUUUUAGUU 5'
query=miR2868, target=R03G_01836, score=4, range=803-822, strand=
target 5' UGUUGCAACAACAAGAUCAU 3'
::::: :::::::::::::::
query 3' ACGAUGAUGUUGUUUUAGUU 5'
query=miR2868, target=R03G_08583, score=4, range=1788-1806, stran
target 5' UGUUAUUACAG-AAAUCAA 3'
::::::::::::: :::::::::::::::
query 3' ACGAUGAUGUUGUUUUAGUU 5'
```

query=miR2868, target=R03G\_00460, score=4, range=291-310, strand=  
target 5' UCCUACUAAAACAAAGUCA 3'  
: ::::: ::::: :::::  
query 3' ACGAUGAUGUUGUUUUAGUU 5'  
query=miR2868, target=R03G\_06532, score=4, range=650-669, strand=  
target 5' AGCAACUACAGCAAAAUCAU 3'  
:: ::::: ::::: :::::  
query 3' ACGAUGAUGUUGUUUUAGUU 5'  
query=miR2868, target=R03G\_09230, score=4, range=195-214, strand=  
target 5' UACUACUACAACAAAAGCAC 3'  
: ::::: ::::: :::::  
query 3' ACGAUGAUGUUGUUUUAGUU 5'  
query=miR2868, target=R03G\_00896, score=4, range=359-378, strand=  
target 5' AGAUAAUGCAACAAAUCA 3'  
: :: ::::: ::::: :::::  
query 3' ACGAUGAUGUUGUUUUAGUU 5'  
query=miR2868, target=R03G\_13441, score=4, range=375-394, strand=  
target 5' AGCUUUAACAACAAAUCAG 3'  
::: . ::::: ::::: :::::  
query 3' ACGAUGAUGUUGUUUUAGUU 5'  
query=miR2868, target=R03G\_14147, score=4, range=1136-1154, stran  
target 5' UG-UACAAUAAUAAAUCA 3'  
:: ::: ::::: ::::: :::::  
query 3' ACGAUGAUGUUGUUUUAGUU 5'  
query=miR2868, target=R03G\_13385, score=4, range=92-111, strand=1  
target 5' AUCAACAACAACAAAUCA 3'  
: :: ::::: ::::: :::::  
query 3' ACGAUGAUGUUGUUUUAGUU 5'  
query=miR2868, target=R03G\_04779, score=4, range=461-479, strand=  
target 5' CGC-AAUACAACAAAGUCA 3'  
:: : ::::: ::::: :::::  
query 3' ACGAUGAUGUUGUUUUAGUU 5'  
query=miR2868, target=R03G\_08932, score=4, range=432-450, strand=  
target 5' CGUU-CAACAACAAAUCAG 3'  
::: : ::::: ::::: :::::  
query 3' ACGAUGAUGUUGUUUUAGUU 5'  
query=miR2868, target=R03G\_03029, score=4, range=1583-1602, stran  
target 5' UUCAACAACAACAAAUCAC 3'  
: : ::: ::::: ::::: :::::  
query 3' ACGAUGAUGUUGUUUUAGUU 5'  
query=miR2868, target=R03G\_03922, score=4, range=3036-3054, stran  
target 5' UGC-AGAGCAACAAAUCA 3'  
::: : ::::: ::::: :::::  
query 3' ACGAUGAUGUUGUUUUAGUU 5'  
query=miR2868, target=R03G\_15451, score=4, range=1122-1140, stran

```
target 5' UACUAC-ACAACGAAAUCAC 3'
: :::: :.....:
query 3' ACGAUGAUGUUGUUUUUAGUU 5'
query=miR2868, target=R03G_02573, score=4, range=295-315, strand=
target 5' GGUAUUAUCAACAAAUCAA 3'
:.....: :.....:
query 3' ACGAUGAU-GUUGUUUUAGUU 5'
query=miR2868, target=R03G_03208, score=4, range=18-36, strand=1
target 5' UGCAAC-ACAACAAAUUUAU 3'
::: :: :.....:
query 3' ACGAUGAUGUUGUUUUUAGUU 5'
query=miR2868, target=R03G_07160, score=4, range=996-1014, strand
target 5' UGCUGUUA-GACAAAUCAA 3'
:.....: .:.....:
query 3' ACGAUGAUGUUGUUUUUAGUU 5'
query=miR2868, target=R03G_08051, score=4, range=599-618, strand=
target 5' UGUUUUACAACAAAUAAA 3'
:..: .:.....: ::
query 3' ACGAUGAUGUUGUUUUUAGUU 5'
query=miR2868, target=R03G_17116, score=4, range=230-249, strand=
target 5' AACUGGUACAACAAAUCAG 3'
:.. :.....:
query 3' ACGAUGAUGUUGUUUUUAGUU 5'
query=miR2868, target=R03G_16533, score=4, range=284-304, strand=
target 5' GGUUGCAAACAACAAAUCAA 3'
:..: :.....:
query 3' ACGAUG-AUGUUGUUUUAGUU 5'
query=miR2868, target=R03G_03727, score=4, range=1259-1278, stran
target 5' UGCCUUGACAACAAAUCAG 3'
:.. . :.....:
query 3' ACGAUGAUGUUGUUUUUAGUU 5'
query=miR2592bp-3p, target=R03G_17250, score=0, range=158-180,
strand=-1
target 5' UCGCAAUGCAUGGAGUUCGGCCA 3'
:.....:
query 3' AGCGUUACGUACCUCAAGCCGGU 5'
query=miR2592bp-3p, target=R03G_16365, score=0, range=158-180,
strand=-1
target 5' UCGCAAUGCAUGGAGUUCGGCCA 3'
:.....:
query 3' AGCGUUACGUACCUCAAGCCGGU 5'
query=miR2592bp-3p, target=R03G_09174, score=0, range=158-180,
strand=-1
target 5' UCGCAAUGCAUGGAGUUCGGCCA 3'
:.....:
```





```
.....:
query 3' CUUUUUUUCUUUCGAGUUGGGUU 5'
query=miR8011a-5p, target=R03G_16065, score=4, range=407-429,
strand=-1
target 5' GGAAUAAGAAAACUCAACCCAG 3'
.....:
query 3' CUUUUUUUCUUUCGAGUUGGGUU 5'
query=miR1152, target=R03G_13297, score=0, range=719-738, strand=
target 5' UUCAAGACGCGCUCCUUUUA 3'
.....:
query 3' AAGUUCUGCGCGAGGAAAAU 5'
query=miR1152, target=R03G_09480, score=0, range=4958-4977, stran
target 5' UUCAAGACGCGCUCCUUUUA 3'
.....:
query 3' AAGUUCUGCGCGAGGAAAAU 5'
query=miR1152, target=R03G_10676, score=0, range=4100-4119, stran
target 5' UUCAAGACGCGCUCCUUUUA 3'
.....:
query 3' AAGUUCUGCGCGAGGAAAAU 5'
query=miR1152, target=R03G_11284, score=3.5, range=2536-2554, str
target 5' UUCAACGAGCUCCUUUUG 3'
.....:
query 3' AAGUUCUGCGCGAGGAAAAU 5'
query=miR1152, target=R03G_13853, score=3.5, range=1582-1600, str
target 5' UUCAACGAGCUCCUUUUG 3'
.....:
query 3' AAGUUCUGCGCGAGGAAAAU 5'
query=miR1152, target=R03G_13301, score=3.5, range=637-655, stran
target 5' UUCAACGAGCUCCUUUUG 3'
.....:
query 3' AAGUUCUGCGCGAGGAAAAU 5'
query=miR1152, target=R03G_00705, score=3.5, range=2536-2554, str
target 5' UUCAACGAGCUCCUUUUG 3'
.....:
query 3' AAGUUCUGCGCGAGGAAAAU 5'
query=miR1152, target=R03G_11478, score=3.5, range=121-139, stran
target 5' UUCAACGAGCUCCUUUUG 3'
.....:
query 3' AAGUUCUGCGCGAGGAAAAU 5'
query=miR1152, target=R03G_10802, score=4, range=1654-1672, stran
target 5' UUUAAACGAGCUCCUUUUG 3'
.....:
query 3' AAGUUCUGCGCGAGGAAAAU 5'
query=miR1152, target=R03G_01906, score=4, range=1174-1193, stran
target 5' CUUAAGAUGUGCUCUUUUG 3'
```



.....  
query 3' AAGUUCUGCGCGAGGAAAAU 5'  
query=miR1152, target=R03G\_10958, score=4, range=796-815, strand=  
target 5' CUCAGGAUGCGUCCUUUUG 3'  
.....  
query 3' AAGUUCUGCGCGAGGAAAAU 5'  
query=miR1152, target=R03G\_05195, score=4, range=95-114, strand=-  
target 5' UUCUUGACGCGCUUUUUUA 3'  
:: :.....  
query 3' AAGUUCUGCGCGAGGAAAAU 5'  
query=miR854, target=R03G\_06418, score=0, range=381-401, strand=-  
target 5' CCCUUCUCAAUAUCCUCAUCA 3'  
.....  
query 3' GGGAAGAGUUAUAGGAGUAGU 5'  
query=miR854, target=R03G\_11879, score=2.5, range=2138-2158, stra  
target 5' CACUUCUAAUAUCCUUAUCA 3'  
: :.....  
query 3' GGGAAGAGUUAUAGGAGUAGU 5'  
query=miR854, target=R03G\_10853, score=3, range=141-161, strand=-  
target 5' CUCUUUUGAAUAUCUUCAUCA 3'  
:..... :.....  
query 3' GGGAAGAGUUAUAGGAGUAGU 5'  
query=miR854, target=R03G\_09011, score=3.5, range=3740-3760, stra  
target 5' AUCUCGUCAAUAUCCUCAUCA 3'  
.:: :.....  
query 3' GGGAAGAGUUAUAGGAGUAGU 5'  
query=miR854, target=R03G\_12902, score=3.5, range=189-209, strand  
target 5' CUCUUUUCACUAUCCUCAUCG 3'  
:..... :.....  
query 3' GGGAAGAGUUAUAGGAGUAGU 5'  
query=miR854, target=R03G\_06151, score=3.5, range=1314-1335, stra  
target 5' CUCUUCUCCAUAUCCUCAUCA 3'  
:..... :: :.....  
query 3' GGGAAG-AGUUAUAGGAGUAGU 5'  
query=miR854, target=R03G\_04712, score=3.5, range=2535-2555, stra  
target 5' UACUCUCAAUAUCCUCAUCG 3'  
. :: :.....  
query 3' GGGAAGAGUUAUAGGAGUAGU 5'  
query=miR854, target=R03G\_05685, score=3.5, range=678-698, strand  
target 5' UCCUCCUCAAUAUCCUCCUCA 3'  
.:: :..... :..  
query 3' GGGAAGAGUUAUAGGAGUAGU 5'  
query=miR854, target=R03G\_06208, score=3.5, range=213-232, strand  
target 5' UCUUUUCAAU-UCCUCAUCA 3'  
:..... :.....



query=miR1435a, target=R03G\_12006, score=1, range=200-221, strand  
target 5' GAAGAAUUUGCACUUUAAGAAA 3'  
.....  
query 3' CUUUUUGAACGUGAAAUCUUU 5'  
query=miR1435a, target=R03G\_14707, score=1, range=200-221, strand  
target 5' GAAGAAUUUGCACUUUAAGAAA 3'  
.....  
query 3' CUUUUUGAACGUGAAAUCUUU 5'  
query=miR1435a, target=R03G\_16910, score=1, range=200-221, strand  
target 5' GAAGAAUUUGCACUUUAAGAAA 3'  
.....  
query 3' CUUUUUGAACGUGAAAUCUUU 5'  
query=miR1435a, target=R03G\_17365, score=1, range=200-221, strand  
target 5' GAAGAAUUUGCACUUUAAGAAA 3'  
.....  
query 3' CUUUUUGAACGUGAAAUCUUU 5'  
query=miR1435a, target=R03G\_01196, score=1, range=200-221, strand  
target 5' GAAGAAUUUGCACUUUAAGAAA 3'  
.....  
query 3' CUUUUUGAACGUGAAAUCUUU 5'  
query=miR1435a, target=R03G\_13738, score=1, range=200-221, strand  
target 5' GAAGAAUUUGCACUUUAAGAAA 3'  
.....  
query 3' CUUUUUGAACGUGAAAUCUUU 5'  
query=miR159a-3p, target=R03G\_12083, score=3, range=46-64, strand  
target 5' AGAAGUCCUUCAAUCCAA 3'  
::: .....  
query 3' UCUCGAGGGAAGUUAGGUU 5'  
query=miR159a-3p, target=R03G\_13093, score=3.5, range=292-310,  
strand=1  
target 5' GAAGCUCCUUUAAUCCAU 3'  
. ....  
query 3' UCUCGAGGGAAGUUAGGUU 5'  
query=miR159a-3p, target=R03G\_02051, score=3.5, range=137-156,  
strand=-1  
target 5' AGAGCUCCUUCGAAUCAA 3'  
.....  
query 3' UCUCGAGGGAAG-UUAGGUU 5'  
query=miR159a-3p, target=R03G\_01784, score=3.5, range=323-341,  
strand=-1  
target 5' AGAAUUCCUCAAUCAA 3'  
::: .....  
query 3' UCUCGAGGGAAGUUAGGUU 5'  
query=miR159a-3p, target=R03G\_09411, score=3.5, range=8-25, stran  
target 5' AGA-UUCUCUCAAUCAA 3'

```

::: .....:
query 3' UCUCGAGGGAAGUUAGGUU 5'
query=miR159a-3p, target=R03G_08331, score=4, range=104-122, stra
target 5' AGAGCUCUCUCAAUCA 3'
: .....:
query 3' UCUCGAGGGAAGUUAGGUU 5'
query=miR159a-3p, target=R03G_03730, score=4, range=1193-1211,
strand=1
target 5' AGACCUCUCUCAAUCUAC 3'
: .....:
query 3' UCUCGAGGGAAGUUAGGUU 5'
query=miR159a-3p, target=R03G_14260, score=4, range=960-978, stra
target 5' ACGUUUCCCUUCAGUCCAA 3'
: . .....:
query 3' UCUCGAGGGAAGUUAGGUU 5'
query=miR159a-3p, target=R03G_15046, score=4, range=707-725, stra
target 5' UGACCUCAUCAAUCCAA 3'
: : .....:
query 3' UCUCGAGGGAAGUUAGGUU 5'
query=miR159a-3p, target=R03G_14268, score=4, range=37-54, strand
target 5' ACAGCU-UCUCAAUCCAA 3'
: : .....:
query 3' UCUCGAGGGAAGUUAGGUU 5'
query=miR159a-3p, target=R03G_05261, score=4, range=372-389, stra
target 5' AGA-CAUCCUCAAUCCAU 3'
: : .....:
query 3' UCUCGAGGGAAGUUAGGUU 5'
query=miR159a-3p, target=R03G_15464, score=4, range=1048-1065,
strand=1
target 5' CGUGCUCUUUC-AUCCAA 3'
: : .....:
query 3' UCUCGAGGGAAGUUAGGUU 5'
query=miR159a-3p, target=R03G_03201, score=4, range=869-888, stra
target 5' AGAAGCUUUUUAAUCAA 3'
: : .....:
query 3' UC-UCGAGGGAAGUUAGGUU 5'
query=miR159a-3p, target=R03G_12035, score=4, range=812-831, stra
target 5' AGAUGCUCUUUUAAUCAA 3'
: : .....:
query 3' UCU-CGAGGGAAGUUAGGUU 5'
query=miR159a-3p, target=R03G_11721, score=4, range=224-243, stra
target 5' AGUAGCUUCCUCAAUUCAU 3'
: : .....:
query 3' UC-UCGAGGGAAGUUAGGUU 5'
query=miR159a-3p, target=R03G_10153, score=4, range=957-975, stra

```





target 5' GAUACAGACAGAAUGCCAA 3'  
:: :::::::::::::::  
query 3' CUCCACCUUGUCUUACGGUU 5'  
query=miR394a, target=R03G\_06545, score=4, range=923-941, strand=  
target 5' GAGGUAGACAGGAUGACAA 3'  
::::: ::::::::::: :::  
query 3' CUCCACCUUGUCUUACGGUU 5'  
query=miR2654, target=R03G\_15134, score=0, range=179-200, strand=  
target 5' AGCACACUUCGGUCCUGAAUA 3'  
:::::::::::::::::::::  
query 3' UCGUGUGAAGCCAGGGACUUAU 5'  
query=miR2654, target=R03G\_03099, score=0, range=179-200, strand=  
target 5' AGCACACUUCGGUCCUGAAUA 3'  
:::::::::::::::::::::  
query 3' UCGUGUGAAGCCAGGGACUUAU 5'  
query=miR2654, target=R03G\_03546, score=2, range=659-680, strand=  
target 5' AACUCACUUCGGUCCUGAAUA 3'  
: : :::::::::::::::  
query 3' UCGUGUGAAGCCAGGGACUUAU 5'  
query=miR2654, target=R03G\_08065, score=2, range=245-266, strand=  
target 5' AACUCACUUCGGUCCUGAAUA 3'  
: : :::::::::::::::  
query 3' UCGUGUGAAGCCAGGGACUUAU 5'  
query=miR2654, target=R03G\_15293, score=3, range=771-791, strand=  
target 5' AGUAC-UUUCGGUCCUUGAAUA 3'  
::::: .:::::::::::::  
query 3' UCGUGUGAAGCCAGGGACUUAU 5'  
query=miR2654, target=R03G\_02968, score=4, range=1235-1256, stran  
target 5' AGCAUGCUGCGGUCCAUGAAUA 3'  
::::: .: ::::: :::::  
query 3' UCGUGUGAAGCCAGGGACUUAU 5'  
query=miR2609a, target=R03G\_07862, score=0, range=905-926, strand  
target 5' AAGUGACGAGCCAUUACUCCA 3'  
:::::::::::::::::::::  
query 3' UUCACUGCUCGGUAAUGAAGGU 5'  
query=miR2609a, target=R03G\_10744, score=0, range=791-812, strand  
target 5' AAGUGACGAGCCAUUACUCCA 3'  
:::::::::::::::::::::  
query 3' UUCACUGCUCGGUAAUGAAGGU 5'  
query=miR2609a, target=R03G\_16366, score=0, range=791-812, strand  
target 5' AAGUGACGAGCCAUUACUCCA 3'  
:::::::::::::::::::::  
query 3' UUCACUGCUCGGUAAUGAAGGU 5'  
query=miR2609a, target=R03G\_07735, score=0, range=710-731, strand  
target 5' AAGUGACGAGCCAUUACUCCA 3'

```
.....
query 3' UUCACUGCUCGGUAAUGAAGGU 5'
query=miR2609a, target=R03G_10543, score=0, range=263-284, strand
target 5' AAGUGACGAGCCAUUACUCCA 3'
.....
query 3' UUCACUGCUCGGUAAUGAAGGU 5'
query=miR2609a, target=R03G_10747, score=0, range=905-926, strand
target 5' AAGUGACGAGCCAUUACUCCA 3'
.....
query 3' UUCACUGCUCGGUAAUGAAGGU 5'
query=miR2609a, target=R03G_09173, score=0, range=905-926, strand
target 5' AAGUGACGAGCCAUUACUCCA 3'
.....
query 3' UUCACUGCUCGGUAAUGAAGGU 5'
query=miR2609a, target=R03G_17218, score=0, range=791-812, strand
target 5' AAGUGACGAGCCAUUACUCCA 3'
.....
query 3' UUCACUGCUCGGUAAUGAAGGU 5'
query=miR2609a, target=R03G_02741, score=4, range=1688-1709, stra
target 5' AUGUAACCAGCCAUUACUCCU 3'
: : : : :
query 3' UUCACUGCUCGGUAAUGAAGGU 5'
query=miR1169-3p, target=R03G_11964, score=0, range=25-47, strand
target 5' GGUCACAGAAAGCAACAUCCACA 3'
.....
query 3' CCAGUGUCUUUCGUUGUAGGUGU 5'
query=miR1169-3p, target=R03G_13001, score=1, range=1581-1603,
strand=1
target 5' GGUCACAGAAAGUAACAUCCACA 3'
.....
query 3' CCAGUGUCUUUCGUUGUAGGUGU 5'
query=miR1169-3p, target=R03G_06596, score=1, range=1581-1603,
strand=1
target 5' GGUCACAGAAAGUAACAUCCACA 3'
.....
query 3' CCAGUGUCUUUCGUUGUAGGUGU 5'
query=miR1169-3p, target=R03G_03002, score=1, range=1581-1603,
strand=1
target 5' GGUCACAGAAAGUAACAUCCACA 3'
.....
query 3' CCAGUGUCUUUCGUUGUAGGUGU 5'
query=miR1169-3p, target=R03G_13809, score=2, range=59-81, strand
target 5' GGUCACAGAAAGCAACAUACACA 3'
.....
query 3' CCAGUGUCUUUCGUUGUAGGUGU 5'
```





query 3' ACGAGAGAUAGAAGACAGUU 5'  
query=miR157a-5p, target=R03G\_14433, score=3.5, range=5263-5281,  
strand=-1  
target 5' UGAUCUUU-UCUUCUGUCAA 3'  
:: ::::: ::::: :::::  
query 3' ACGAGAGAUAGAAGACAGUU 5'  
query=miR157a-5p, target=R03G\_03674, score=4, range=356-375, stra  
target 5' UGAUCUCUGUCUUGUGUCAA 3'  
:: ::::: ::::: :::::  
query 3' ACGAGAGAUAGAAGACAGUU 5'  
query=miR157a-5p, target=R03G\_02944, score=4, range=2526-2544,  
strand=1  
target 5' UGCUCACUAUUUUCU-UCAA 3'  
::::: ::::: ::::: :::::  
query 3' ACGAGAGAUAGAAGACAGUU 5'  
query=miR157a-5p, target=R03G\_12366, score=4, range=4974-4992,  
strand=1  
target 5' AGCACU-UAUCUUUUGUCAA 3'  
:: :: ::::: ::::: :::::  
query 3' ACGAGAGAUAGAAGACAGUU 5'  
query=miR157a-5p, target=R03G\_04854, score=4, range=614-632, stra  
target 5' UGCUUUUUAUCUUCU-UUAA 3'  
::::: ::::: ::::: :::::  
query 3' ACGAGAGAUAGAAGACAGUU 5'  
query=miR157a-5p, target=R03G\_11943, score=4, range=892-910, stra  
target 5' UGUCUUCU-UCUUCUGUCAA 3'  
:: .::: ::::: ::::: :::::  
query 3' ACGAGAGAUAGAAGACAGUU 5'  
query=miR157a-5p, target=R03G\_13979, score=4, range=842-861, stra  
target 5' UUAUCUGUAUCUUCUGUCAU 3'  
: ::: ::::: ::::: :::::  
query 3' ACGAGAGAUAGAAGACAGUU 5'  
query=miR157a-5p, target=R03G\_08269, score=4, range=235-253, stra  
target 5' UCUUUUCU-UCUUCUGUCAA 3'  
: .::: ::::: ::::: :::::  
query 3' ACGAGAGAUAGAAGACAGUU 5'  
query=miR5228, target=R03G\_16693, score=0, range=1470-1493, stran  
target 5' UCCAUCAAGUUGCUAUCACCACUA 3'  
::::: ::::: ::::: :::::  
query 3' AGGUAGUUCAACGAUAGUGGUGAU 5'  
query=miR5228, target=R03G\_12527, score=0, range=1470-1493, stran  
target 5' UCCAUCAAGUUGCUAUCACCACUA 3'  
::::: ::::: ::::: :::::  
query 3' AGGUAGUUCAACGAUAGUGGUGAU 5'  
query=miR5228, target=R03G\_14347, score=0, range=1464-1487, stran

target 5' UCCAUCAAGUUGCUAUCACCACUA 3'  
:  
query 3' AGGUAGUUCAACGAUAGUGGUGAU 5'  
query=miR5228, target=R03G\_16539, score=0, range=1362-1385, stran  
target 5' UCCAUCAAGUUGCUAUCACCACUA 3'  
:  
query 3' AGGUAGUUCAACGAUAGUGGUGAU 5'  
query=miR5228, target=R03G\_12538, score=0, range=1362-1385, stran  
target 5' UCCAUCAAGUUGCUAUCACCACUA 3'  
:  
query 3' AGGUAGUUCAACGAUAGUGGUGAU 5'  
query=miR5228, target=R03G\_06425, score=0, range=1464-1487, stran  
target 5' UCCAUCAAGUUGCUAUCACCACUA 3'  
:  
query 3' AGGUAGUUCAACGAUAGUGGUGAU 5'  
query=miR5228, target=R03G\_09547, score=0, range=1464-1487, stran  
target 5' UCCAUCAAGUUGCUAUCACCACUA 3'  
:  
query 3' AGGUAGUUCAACGAUAGUGGUGAU 5'  
query=miR5228, target=R03G\_16361, score=0, range=1464-1487, stran  
target 5' UCCAUCAAGUUGCUAUCACCACUA 3'  
:  
query 3' AGGUAGUUCAACGAUAGUGGUGAU 5'  
query=miR5228, target=R03G\_05330, score=0, range=1464-1487, stran  
target 5' UCCAUCAAGUUGCUAUCACCACUA 3'  
:  
query 3' AGGUAGUUCAACGAUAGUGGUGAU 5'  
query=miR5228, target=R03G\_17021, score=0, range=1464-1487, stran  
target 5' UCCAUCAAGUUGCUAUCACCACUA 3'  
:  
query 3' AGGUAGUUCAACGAUAGUGGUGAU 5'  
query=miR5228, target=R03G\_12677, score=0, range=1464-1487, stran  
target 5' UCCAUCAAGUUGCUAUCACCACUA 3'  
:  
query 3' AGGUAGUUCAACGAUAGUGGUGAU 5'  
query=miR5228, target=R03G\_04933, score=0, range=1464-1487, stran  
target 5' UCCAUCAAGUUGCUAUCACCACUA 3'  
:  
query 3' AGGUAGUUCAACGAUAGUGGUGAU 5'  
query=miR5228, target=R03G\_02704, score=0, range=1464-1487, stran  
target 5' UCCAUCAAGUUGCUAUCACCACUA 3'  
:  
query 3' AGGUAGUUCAACGAUAGUGGUGAU 5'  
query=miR5228, target=R03G\_05344, score=0, range=1464-1487, stran  
target 5' UCCAUCAAGUUGCUAUCACCACUA 3'

query 3' AGGUAGUUCAACGAUAGUGGUGAU 5'  
query=miR5228, target=R03G\_03778, score=0, range=1422-1445, stran  
target 5' UCCAUCAAGUUGCUAUCACCACUA 3'

query 3' AGGUAGUUCAACGAUAGUGGUGAU 5'  
query=miR5228, target=R03G\_17422, score=0, range=765-788, strand=  
target 5' UCCAUCAAGUUGCUAUCACCACUA 3'

query 3' AGGUAGUUCAACGAUAGUGGUGAU 5'  
query=miR5228, target=R03G\_12532, score=0, range=1470-1493, stran  
target 5' UCCAUCAAGUUGCUAUCACCACUA 3'

query 3' AGGUAGUUCAACGAUAGUGGUGAU 5'  
query=miR5228, target=R03G\_01936, score=0, range=1470-1493, stran  
target 5' UCCAUCAAGUUGCUAUCACCACUA 3'

query 3' AGGUAGUUCAACGAUAGUGGUGAU 5'  
query=miR5228, target=R03G\_09493, score=0, range=255-278, strand=  
target 5' UCCAUCAAGUUGCUAUCACCACUA 3'

query 3' AGGUAGUUCAACGAUAGUGGUGAU 5'  
query=miR5228, target=R03G\_00242, score=0, range=1470-1493, stran  
target 5' UCCAUCAAGUUGCUAUCACCACUA 3'

query 3' AGGUAGUUCAACGAUAGUGGUGAU 5'  
query=miR5228, target=R03G\_11414, score=0, range=1362-1385, stran  
target 5' UCCAUCAAGUUGCUAUCACCACUA 3'

query 3' AGGUAGUUCAACGAUAGUGGUGAU 5'  
query=miR5228, target=R03G\_08105, score=0, range=219-242, strand=  
target 5' UCCAUCAAGUUGCUAUCACCACUA 3'

query 3' AGGUAGUUCAACGAUAGUGGUGAU 5'  
query=miR5228, target=R03G\_13918, score=1, range=1470-1493, stran  
target 5' UCCAUCAAGUUGCUAUCACCGCUA 3'

query 3' AGGUAGUUCAACGAUAGUGGUGAU 5'  
query=miR5228, target=R03G\_10804, score=1, range=1470-1493, stran  
target 5' UCCAUCAAGUUGCUAUCACCGCUA 3'

query 3' AGGUAGUUCAACGAUAGUGGUGAU 5'  
query=miR5228, target=R03G\_07311, score=1, range=1470-1493, stran  
target 5' UCCAUCAAGUUGCUAUCACCGCUA 3'

query 3' AGGUAGUUCAACGAUAGUGGUGAU 5'  
query=miR5228, target=R03G\_01614, score=1, range=1470-1493, stran  
target 5' UCCAUCAAGUUGCUAUCACCGCUA 3'  
.....  
query 3' AGGUAGUUCAACGAUAGUGGUGAU 5'  
query=miR5228, target=R03G\_04126, score=1, range=1464-1487, stran  
target 5' UCCAUCAAGUUGCUAUCACCGCUA 3'  
.....  
query 3' AGGUAGUUCAACGAUAGUGGUGAU 5'  
query=miR5228, target=R03G\_12673, score=1, range=765-788, strand=  
target 5' UCCAUCAAGUUGCUAUCACCGCUA 3'  
.....  
query 3' AGGUAGUUCAACGAUAGUGGUGAU 5'  
query=miR5228, target=R03G\_03619, score=1, range=1470-1493, stran  
target 5' UCCAUCAAGUUGCUAUCACCGCUA 3'  
.....  
query 3' AGGUAGUUCAACGAUAGUGGUGAU 5'  
query=miR5228, target=R03G\_02821, score=1, range=1470-1493, stran  
target 5' UCCAUCAAGUUGCUAUCACCGCUA 3'  
.....  
query 3' AGGUAGUUCAACGAUAGUGGUGAU 5'  
query=miR5228, target=R03G\_05515, score=1, range=459-482, strand=  
target 5' UCCAUCAAGUUGCUAUCACCGCUA 3'  
.....  
query 3' AGGUAGUUCAACGAUAGUGGUGAU 5'  
query=miR5228, target=R03G\_00295, score=1, range=1308-1331, stran  
target 5' UCCAUCAAGUUGCUAUCACCGCUA 3'  
.....  
query 3' AGGUAGUUCAACGAUAGUGGUGAU 5'  
query=miR5228, target=R03G\_13722, score=1, range=1461-1484, stran  
target 5' UCCAUCAUUUGCUAUCACCACUA 3'  
..... :  
query 3' AGGUAGUUCAACGAUAGUGGUGAU 5'  
query=miR1850.1, target=R03G\_13985, score=1, range=15-35, strand=  
target 5' UCCCAACUCCCAAACUUUCAU 3'  
.....  
query 3' AGGGUUGAGGGUUUGAAAGUU 5'  
query=miR1850.1, target=R03G\_10032, score=2, range=9-29, strand=1  
target 5' UCCCAACUCCCAAACUUUCCA 3'  
..... :  
query 3' AGGGUUGAGGGUUUGAAAGUU 5'  
query=miR1850.1, target=R03G\_14387, score=3, range=1228-1248, str  
target 5' UUUCAAAUCCAGACUUUCA 3'  
.....  
query 3' AGGGUUGAGGGUUUGAAAGUU 5'











query 3' GCACUGUUUUCACCGUCGUUU 5'  
query=miR773a, target=R03G\_15904, score=2, range=585-604, strand=  
target 5' GGUG-CAAAAGUGGCAGCAAA 3'  
query 3' GCACUGUUUUCACCGUCGUUU 5'  
query=miR773a, target=R03G\_16361, score=3, range=900-920, strand=  
target 5' CGUGACAAAAGUUGCGGCAAA 3'  
query 3' GCACUGUUUUCACCGUCGUUU 5'  
query=miR773a, target=R03G\_17422, score=3, range=201-221, strand=  
target 5' CGUGACAAAAGUUGCGGCAAA 3'  
query 3' GCACUGUUUUCACCGUCGUUU 5'  
query=miR773a, target=R03G\_07244, score=4, range=674-694, strand=  
target 5' GGGUCCAAAAGUGGCAGCAAA 3'  
query 3' GCACUGUUUUCACCGUCGUUU 5'  
query=miR773a, target=R03G\_06815, score=4, range=581-601, strand=  
target 5' GGGUCCAAAAGUGGCAGCAAA 3'  
query 3' GCACUGUUUUCACCGUCGUUU 5'  
query=miR773a, target=R03G\_12228, score=4, range=647-667, strand=  
target 5' GGGUCCAAAAGUGGCAGCAAA 3'  
query 3' GCACUGUUUUCACCGUCGUUU 5'  
query=miR773a, target=R03G\_12986, score=4, range=647-667, strand=  
target 5' GGGUCCAAAAGUGGCAGCAAA 3'  
query 3' GCACUGUUUUCACCGUCGUUU 5'  
query=miR773a, target=R03G\_12985, score=4, range=647-667, strand=  
target 5' GGGUCCAAAAGUGGCAGCAAA 3'  
query 3' GCACUGUUUUCACCGUCGUUU 5'  
query=miR773a, target=R03G\_12229, score=4, range=647-667, strand=  
target 5' GGGUCCAAAAGUGGCAGCAAA 3'  
query 3' GCACUGUUUUCACCGUCGUUU 5'  
query=miR773a, target=R03G\_07241, score=4, range=581-601, strand=  
target 5' GGGUCCAAAAGUGGCAGCAAA 3'  
query 3' GCACUGUUUUCACCGUCGUUU 5'  
query=miR773a, target=R03G\_00573, score=4, range=419-439, strand=  
target 5' GGGUCCAAAAGUGGCAGCAAA 3'

```

query 3' GCACUGUUUUCACCGUCGUUU 5'
query=miR773a, target=R03G_06812, score=4, range=647-667, strand=
target 5' GGGUCCAAAAGUGGCAGCAAA 3'
: ::::::::::::::::::::
query 3' GCACUGUUUUCACCGUCGUUU 5'
query=miR773a, target=R03G_15475, score=4, range=467-487, strand=
target 5' GGGUCCAAAAGUGGCAGCAAA 3'
: ::::::::::::::::::::
query 3' GCACUGUUUUCACCGUCGUUU 5'
query=miR773a, target=R03G_01424, score=4, range=347-366, strand=
target 5' UGUUGC-GAAGUGGCAGCAAG 3'
.::: .: .::::::::::::::::::.
query 3' GCACUGUUUUCACCGUCGUUU 5'
query=miR6030, target=R03G_02123, score=3.5, range=1708-1728, str
target 5' GGUAUGGGUGGUAUGGGUGGU 3'
::: :: .::::::::::::::::::
query 3' CCAGACAUACCAUACCCACCU 5'
query=miR6030, target=R03G_02086, score=4, range=2452-2472, stran
target 5' GAACUUAUGGUAUGGGUGGA 3'
: :: ::::::::::::::::::::
query 3' CCAGACAUACCAUACCCACCU 5'
query=miR6030, target=R03G_06021, score=4, range=713-732, strand=
target 5' GUUCUCU-UGGUAUGGGUGGU 3'
: ::: : ::::::::::::::::::::
query 3' CCAGACAUACCAUACCCACCU 5'
query=miR5654a, target=R03G_10995, score=3.5, range=161-180, stra
target 5' GGAUGGUGUUUUGGAUUUAU 3'
::::::::::::: ::::::::::::::
query 3' CCUACUACGAACCCUAAAUA 5'
query=miR5654a, target=R03G_02461, score=3.5, range=1316-1335,
strand=-1
target 5' AAAUUGUGCUUGGGAUUUUAU 3'
:: .::::::::::::::::::
query 3' CCUACUACGAACCCUAAAUA 5'
query=miR5654a, target=R03G_12701, score=4, range=125-145, strand
target 5' UUUUGACUGCUUGGGAUUUUAU 3'
::: ::::::::::::::::::::
query 3' CCUACU-ACGAACCCUAAAUA 5'
query=miR1512a-3p, target=R03G_12005, score=1, range=1189-1210,
strand=-1
target 5' CAAACUGACAUUCUUAAGGCA 3'
:::::::::::::
query 3' GUUUUGACUGUAAGAAUUUCGU 5'
query=miR1512a-3p, target=R03G_04676, score=1, range=1189-1210,
strand=-1

```



```
:: : : : : : : : : : : .
query 3' CGAUAGCCAGAGAGCGGU 5'
query=miR9552b-3p, target=R03G_08147, score=3, range=380-398, str
target 5' GUUAUCGUGUCUCUCGCCG 3'
: : : : : : : : : : : .
query 3' CGAUAGC-CAGAGAGCGGU 5'
query=miR9552b-3p, target=R03G_15177, score=3, range=174-191,
strand=-1
target 5' GCCUUCGGUUUCUCGCCA 3'
: : : : : : : : : : : .
query 3' CGAUAGCCAGAGAGCGGU 5'
query=miR9552b-3p, target=R03G_09077, score=3.5, range=1057-1074,
strand=1
target 5' GGUGUUGGUCUCUUGCCA 3'
: : : : : : : : : : : .
query 3' CGAUAGCCAGAGAGCGGU 5'
query=miR9552b-3p, target=R03G_09074, score=3.5, range=1057-1074,
strand=1
target 5' GGUGUUGGUCUCUUGCCA 3'
: : : : : : : : : : : .
query 3' CGAUAGCCAGAGAGCGGU 5'
query=miR9552b-3p, target=R03G_03948, score=4, range=67-84, stran
target 5' GCUAUCGGUCUCUCAUUA 3'
: : : : : : : : : : : .
query 3' CGAUAGCCAGAGAGCGGU 5'
query=miR9552b-3p, target=R03G_02584, score=4, range=148-165, str
target 5' GCUACCGGUCUCUUGCUC 3'
: : : : : : : : : : : .
query 3' CGAUAGCCAGAGAGCGGU 5'
query=miR9552b-3p, target=R03G_07084, score=4, range=148-165, str
target 5' GCUACCGGUCUCUUGCUU 3'
: : : : : : : : : : : .
query 3' CGAUAGCCAGAGAGCGGU 5'
query=miR9552b-3p, target=R03G_00058, score=4, range=1521-1539,
strand=1
target 5' UCUGAUCGGUCUCUUGCCC 3'
: : : : : : : : : : : .
query 3' CGA-UAGCCAGAGAGCGGU 5'
query=miR9552b-3p, target=R03G_14836, score=4, range=85-102, stra
target 5' CCAACCGGUCUUUCGCCA 3'
: : : : : : : : : : : .
query 3' CGAUAGCCAGAGAGCGGU 5'
query=miR9552b-3p, target=R03G_00174, score=4, range=380-398, str
target 5' GUUACCGGUCUCUCGCCG 3'
: : : : : : : : : : : .
```

query 3' CGAUAGC-CAGAGAGCGGU 5'  
query=miR9552b-3p, target=R03G\_12433, score=4, range=3236-3252,  
strand=-1  
target 5' ACUAUCGGUCUC-CGUCA 3'  
.::.::.::.::.

query 3' CGAUAGCCAGAGAGCGGU 5'  
query=miR9552b-3p, target=R03G\_05760, score=4, range=745-761,  
strand=-1  
target 5' GC-AUCUGUCUCUUGCCA 3'  
.: :.: :.::.::.

query 3' CGAUAGCCAGAGAGCGGU 5'  
query=miR8141, target=R03G\_03764, score=0.5, range=502-521, stran  
target 5' GCACCACCAACUAGUAUGCA 3'  
.:.:.:.:.:.:.:.:.:

query 3' UGUGGUGGUUGAUCAUACGU 5'  
query=miR8141, target=R03G\_05431, score=0.5, range=829-848, stran  
target 5' GCACCACCAACUAGUAUGCA 3'  
.:.:.:.:.:.:.:.:.:

query 3' UGUGGUGGUUGAUCAUACGU 5'  
query=miR8141, target=R03G\_05421, score=0.5, range=541-560, stran  
target 5' GCACCACCAACUAGUAUGCA 3'  
.:.:.:.:.:.:.:.:.:

query 3' UGUGGUGGUUGAUCAUACGU 5'  
query=miR8141, target=R03G\_12666, score=0.5, range=502-521, stran  
target 5' GCACCACCAACUAGUAUGCA 3'  
.:.:.:.:.:.:.:.:.:

query 3' UGUGGUGGUUGAUCAUACGU 5'  
query=miR8141, target=R03G\_12954, score=0.5, range=871-890, stran  
target 5' GCACCACCAACUAGUAUGCA 3'  
.:.:.:.:.:.:.:.:.:

query 3' UGUGGUGGUUGAUCAUACGU 5'  
query=miR8141, target=R03G\_12071, score=0.5, range=502-521, stran  
target 5' GCACCACCAACUAGUAUGCA 3'  
.:.:.:.:.:.:.:.:.:

query 3' UGUGGUGGUUGAUCAUACGU 5'  
query=miR8141, target=R03G\_03776, score=0.5, range=331-350, stran  
target 5' GCACCACCAACUAGUAUGCA 3'  
.:.:.:.:.:.:.:.:.:

query 3' UGUGGUGGUUGAUCAUACGU 5'  
query=miR8141, target=R03G\_14560, score=0.5, range=739-758, stran  
target 5' GCACCACCAACUAGUAUGCA 3'  
.:.:.:.:.:.:.:.:.:

query 3' UGUGGUGGUUGAUCAUACGU 5'  
query=miR8141, target=R03G\_13858, score=0.5, range=502-521, stran  
target 5' GCACCACCAACUAGUAUGCA 3'







```
:::::::::::
query 3' ACUUCUUCGCACGUACGUCAU 5'
query=miR902a-5p, target=R03G_07868, score=1, range=327-347, stra
target 5' UGAAGAAGCGUGCAUGCAGUU 3'
:::::::::::
query 3' ACUUCUUCGCACGUACGUCAU 5'
query=miR902a-5p, target=R03G_10545, score=1, range=327-347, stra
target 5' UGAAGAAGCGUGCAUGCAGUU 3'
:::::::::::
query 3' ACUUCUUCGCACGUACGUCAU 5'
query=miR902a-5p, target=R03G_04676, score=2, range=327-347, stra
target 5' UGAAGAAGCGUGUAUGCAGUU 3'
:::::::::::
query 3' ACUUCUUCGCACGUACGUCAU 5'
query=miR902a-5p, target=R03G_12005, score=2, range=327-347, stra
target 5' UGAAGAAGCGUGUAUGCAGUU 3'
:::::::::::
query 3' ACUUCUUCGCACGUACGUCAU 5'
query=miR902a-5p, target=R03G_15157, score=2, range=327-347, stra
target 5' UGAAGAAGCGUGUAUGCAGUU 3'
:::::::::::
query 3' ACUUCUUCGCACGUACGUCAU 5'
query=miR902a-5p, target=R03G_14637, score=2, range=327-347, stra
target 5' UGAAGAAGCGUGUAUGCAGUU 3'
:::::::::::
query 3' ACUUCUUCGCACGUACGUCAU 5'
query=miR774b-5p, target=R03G_14626, score=0, range=1870-1892,
strand=1
target 5' GUCACUCCAAUAUGCAUCUUCA 3'
:::::::::::
query 3' CAGUGAGGUUUUAUACGUAGAAGU 5'
query=miR774b-5p, target=R03G_16138, score=0, range=1870-1892,
strand=1
target 5' GUCACUCCAAUAUGCAUCUUCA 3'
:::::::::::
query 3' CAGUGAGGUUUUAUACGUAGAAGU 5'
query=miR774b-5p, target=R03G_12072, score=0, range=1870-1892,
strand=1
target 5' GUCACUCCAAUAUGCAUCUUCA 3'
:::::::::::
query 3' CAGUGAGGUUUUAUACGUAGAAGU 5'
query=miR774b-5p, target=R03G_01740, score=0, range=1834-1856,
strand=1
target 5' GUCACUCCAAUAUGCAUCUUCA 3'
:::::::::::
```

query 3' CAGUGAGGUUUUACGUAGAAGU 5'  
query=miR774b-5p, target=R03G\_05958, score=0, range=1834-1856,  
strand=1  
target 5' GUCACUCCAAAUAUGCAUCUUCA 3'  
::::::::::::::::::::::::::  
query 3' CAGUGAGGUUUUACGUAGAAGU 5'  
query=miR774b-5p, target=R03G\_17441, score=0, range=1597-1619,  
strand=1  
target 5' GUCACUCCAAAUAUGCAUCUUCA 3'  
::::::::::::::::::::::::::  
query 3' CAGUGAGGUUUUACGUAGAAGU 5'  
query=miR774b-5p, target=R03G\_10522, score=0, range=1834-1856,  
strand=1  
target 5' GUCACUCCAAAUAUGCAUCUUCA 3'  
::::::::::::::::::::::::::  
query 3' CAGUGAGGUUUUACGUAGAAGU 5'  
query=miR774b-5p, target=R03G\_07294, score=0, range=1471-1493,  
strand=1  
target 5' GUCACUCCAAAUAUGCAUCUUCA 3'  
::::::::::::::::::::::::::  
query 3' CAGUGAGGUUUUACGUAGAAGU 5'  
query=miR774b-5p, target=R03G\_04785, score=0, range=1834-1856,  
strand=1  
target 5' GUCACUCCAAAUAUGCAUCUUCA 3'  
::::::::::::::::::::::::::  
query 3' CAGUGAGGUUUUACGUAGAAGU 5'  
query=miR774b-5p, target=R03G\_01954, score=0, range=820-842, stra  
target 5' GUCACUCCAAAUAUGCAUCUUCA 3'  
::::::::::::::::::::::::::  
query 3' CAGUGAGGUUUUACGUAGAAGU 5'  
query=miR774b-5p, target=R03G\_13149, score=0, range=67-89, strand  
target 5' GUCACUCCAAAUAUGCAUCUUCA 3'  
::::::::::::::::::::::::::  
query 3' CAGUGAGGUUUUACGUAGAAGU 5'  
query=miR774b-5p, target=R03G\_17385, score=0.5, range=1870-1892,  
strand=1  
target 5' GUUACUCCAAAUAUGCAUCUUCA 3'  
::::::::::::::::::::::::::  
query 3' CAGUGAGGUUUUACGUAGAAGU 5'  
query=miR774b-5p, target=R03G\_07686, score=0.5, range=1870-1892,  
strand=1  
target 5' GUUACUCCAAAUAUGCAUCUUCA 3'  
::::::::::::::::::::::::::  
query 3' CAGUGAGGUUUUACGUAGAAGU 5'  
query=miR774b-5p, target=R03G\_12009, score=0.5, range=1870-1892,

strand=1  
target 5' GUUACUCCAAAUAUGCAUCUUCA 3'  
:~::~  
query 3' CAGUGAGGUUUUAUACGUAGAAGU 5'  
query=miR774b-5p, target=R03G\_11771, score=0.5, range=1870-1892,  
strand=1  
target 5' GUUACUCCAAAUAUGCAUCUUCA 3'  
:~::~  
query 3' CAGUGAGGUUUUAUACGUAGAAGU 5'  
query=miR774b-5p, target=R03G\_17358, score=0.5, range=1870-1892,  
strand=1  
target 5' GUUACUCCAAAUAUGCAUCUUCA 3'  
:~::~  
query 3' CAGUGAGGUUUUAUACGUAGAAGU 5'  
query=miR774b-5p, target=R03G\_09940, score=0.5, range=1870-1892,  
strand=1  
target 5' GUUACUCCAAAUAUGCAUCUUCA 3'  
:~::~  
query 3' CAGUGAGGUUUUAUACGUAGAAGU 5'  
query=miR774b-5p, target=R03G\_12169, score=0.5, range=1870-1892,  
strand=1  
target 5' GUUACUCCAAAUAUGCAUCUUCA 3'  
:~::~  
query 3' CAGUGAGGUUUUAUACGUAGAAGU 5'  
query=miR774b-5p, target=R03G\_14710, score=0.5, range=1870-1892,  
strand=1  
target 5' GUUACUCCAAAUAUGCAUCUUCA 3'  
:~::~  
query 3' CAGUGAGGUUUUAUACGUAGAAGU 5'  
query=miR774b-5p, target=R03G\_07976, score=0.5, range=1867-1889,  
strand=1  
target 5' GUUACUCCAAAUAUGCAUCUUCA 3'  
:~::~  
query 3' CAGUGAGGUUUUAUACGUAGAAGU 5'  
query=miR774b-5p, target=R03G\_10725, score=0.5, range=1834-1856,  
strand=1  
target 5' GUUACUCCAAAUAUGCAUCUUCA 3'  
:~::~  
query 3' CAGUGAGGUUUUAUACGUAGAAGU 5'  
query=miR774b-5p, target=R03G\_01309, score=0.5, range=1819-1841,  
strand=1  
target 5' GUUACUCCAAAUAUGCAUCUUCA 3'  
:~::~  
query 3' CAGUGAGGUUUUAUACGUAGAAGU 5'  
query=miR774b-5p, target=R03G\_13747, score=0.5, range=1870-1892,



```
.....:
query 3' CAGUGAGGUUUUACGUAGAAGU 5'
query=miR774b-5p, target=R03G_01207, score=2.5, range=1687-1709,
strand=1
target 5' GGUACUCCAAUAUGCAUUUUCA 3'
: .....:
query 3' CAGUGAGGUUUUACGUAGAAGU 5'
query=miR774b-5p, target=R03G_08815, score=4, range=1695-1716,
strand=-1
target 5' GUUA-UUGAUUAUGCAUCUUCA 3'
:..: :. : .....:
query 3' CAGUGAGGUUUUACGUAGAAGU 5'
query=miR9653a-3p, target=R03G_10862, score=0, range=329-347, str
target 5' GGCCAGCCCAAAGUCCCAA 3'
:.....:
query 3' CCGGUCGGGUUUCAGGGUU 5'
query=miR9653a-3p, target=R03G_00677, score=1, range=359-377, str
target 5' GGCCAGCCCAAAGUCCCGA 3'
:.....:
query 3' CCGGUCGGGUUUCAGGGUU 5'
query=miR9653a-3p, target=R03G_03605, score=1, range=1259-1277,
strand=1
target 5' GGCCAGCCCAAAGUCCCGA 3'
:.....:
query 3' CCGGUCGGGUUUCAGGGUU 5'
query=miR9653a-3p, target=R03G_05950, score=1, range=275-293, str
target 5' GGCCAGCCCAAAGUCCCGA 3'
:.....:
query 3' CCGGUCGGGUUUCAGGGUU 5'
query=miR9653a-3p, target=R03G_16715, score=1, range=257-275, str
target 5' GGCCAGCCCAAAGUCCCGA 3'
:.....:
query 3' CCGGUCGGGUUUCAGGGUU 5'
query=miR9653a-3p, target=R03G_17406, score=1, range=158-176, str
target 5' GGCCAGCCCAAAGUCCCGA 3'
:.....:
query 3' CCGGUCGGGUUUCAGGGUU 5'
query=miR9653a-3p, target=R03G_01588, score=1, range=137-155, str
target 5' GGCCAGCCCAAAGUCCCGA 3'
:.....:
query 3' CCGGUCGGGUUUCAGGGUU 5'
query=miR9653a-3p, target=R03G_00690, score=2, range=746-764, str
target 5' GGCCAGCUCAAAGUCCCGA 3'
:.....:
query 3' CCGGUCGGGUUUCAGGGUU 5'
```

query=miR9653a-3p, target=R03G\_01925, score=2, range=806-824, str  
target 5' GGCCAGCUCAAAGUCCCGA 3'  
:~::~  
query 3' CCGGUCGGGUUUCAGGGUU 5'  
query=miR9653a-3p, target=R03G\_07024, score=2, range=806-824, str  
target 5' GGCCAGCUCAAAGUCCCGA 3'  
:~::~  
query 3' CCGGUCGGGUUUCAGGGUU 5'  
query=miR9653a-3p, target=R03G\_07121, score=2, range=806-824, str  
target 5' GGCCAGCUCAAAGUCCCGA 3'  
:~::~  
query 3' CCGGUCGGGUUUCAGGGUU 5'  
query=miR9653a-3p, target=R03G\_12525, score=2, range=728-746, str  
target 5' GGCCAGCUCAAAGUCCCGA 3'  
:~::~  
query 3' CCGGUCGGGUUUCAGGGUU 5'  
query=miR9653a-3p, target=R03G\_04786, score=2, range=374-392, str  
target 5' GGCCAGCUCAAAGUCCCGA 3'  
:~::~  
query 3' CCGGUCGGGUUUCAGGGUU 5'  
query=miR9653a-3p, target=R03G\_09955, score=2, range=491-509, str  
target 5' GGCCAGCUCAAAGUCCCGA 3'  
:~::~  
query 3' CCGGUCGGGUUUCAGGGUU 5'  
query=miR9653a-3p, target=R03G\_02700, score=2, range=491-509, str  
target 5' GGCCAGCUCAAAGUCCCGA 3'  
:~::~  
query 3' CCGGUCGGGUUUCAGGGUU 5'  
query=miR9653a-3p, target=R03G\_03570, score=2, range=491-509, str  
target 5' GGCCAGCUCAAAGUCCCGA 3'  
:~::~  
query 3' CCGGUCGGGUUUCAGGGUU 5'  
query=miR9653a-3p, target=R03G\_11273, score=2, range=137-155, str  
target 5' GGCCAGCUCAAAGUCCCGA 3'  
:~::~  
query 3' CCGGUCGGGUUUCAGGGUU 5'  
query=miR9653a-3p, target=R03G\_16905, score=2, range=614-632, str  
target 5' GGCCAGCUCAAAGUCCCGA 3'  
:~::~  
query 3' CCGGUCGGGUUUCAGGGUU 5'  
query=miR9653a-3p, target=R03G\_04661, score=2, range=437-455, str  
target 5' GGCCUGCCCAAAGUCCCGA 3'  
:~::~  
query 3' CCGGUCGGGUUUCAGGGUU 5'  
query=miR9653a-3p, target=R03G\_13276, score=3, range=179-197, str

target 5' GGCCAGCUCAAAGUCCUGA 3'  
:~::~  
query 3' CCGGUCGGGUUUCAGGGUU 5'  
query=miR9653a-3p, target=R03G\_16118, score=3, range=65-83, stran  
target 5' GGCCAGCUCAAAGUCCUGA 3'  
:~::~  
query 3' CCGGUCGGGUUUCAGGGUU 5'  
query=miR9653a-3p, target=R03G\_10537, score=3, range=620-638, str  
target 5' GGCCAGCUCAAAGUCCUGA 3'  
:~::~  
query 3' CCGGUCGGGUUUCAGGGUU 5'  
query=miR9653a-3p, target=R03G\_07295, score=3, range=629-647, str  
target 5' GGCCAGCUCAAAGUCCUGA 3'  
:~::~  
query 3' CCGGUCGGGUUUCAGGGUU 5'  
query=miR9653a-3p, target=R03G\_12174, score=3, range=122-140, str  
target 5' GGCCAGCUCAAAGUCCUGA 3'  
:~::~  
query 3' CCGGUCGGGUUUCAGGGUU 5'  
query=miR9653a-3p, target=R03G\_17213, score=3, range=122-140, str  
target 5' GGCCAGCUCAAAGUCCUGA 3'  
:~::~  
query 3' CCGGUCGGGUUUCAGGGUU 5'  
query=miR9653a-3p, target=R03G\_08835, score=3, range=107-125, str  
target 5' GGCCAGCUCAAAGUCCUGA 3'  
:~::~  
query 3' CCGGUCGGGUUUCAGGGUU 5'  
query=miR9653a-3p, target=R03G\_10528, score=3, range=122-140, str  
target 5' GGCCAGCUCAAAGUCCUGA 3'  
:~::~  
query 3' CCGGUCGGGUUUCAGGGUU 5'  
query=miR9653a-3p, target=R03G\_11263, score=3, range=122-140, str  
target 5' GGCCAGCUCAAAGUCCUGA 3'  
:~::~  
query 3' CCGGUCGGGUUUCAGGGUU 5'  
query=miR9653a-3p, target=R03G\_12013, score=3, range=122-140, str  
target 5' GGCCAGCUCAAAGUCCUGA 3'  
:~::~  
query 3' CCGGUCGGGUUUCAGGGUU 5'  
query=miR9653a-3p, target=R03G\_07119, score=3, range=122-140, str  
target 5' GGCCAGCUCAAAGUCCUGA 3'  
:~::~  
query 3' CCGGUCGGGUUUCAGGGUU 5'  
query=miR9653a-3p, target=R03G\_10742, score=3, range=122-140, str  
target 5' GGCCAGCUCAAAGUCCUGA 3'

query 3' CCGGUCGGGUUUCAGGGUU 5'  
query=miR9653a-3p, target=R03G\_11528, score=3, range=122-140, str  
target 5' GGCCAGCUCAAAGUCCUGA 3'

query 3' CCGGUCGGGUUUCAGGGUU 5'  
query=miR9653a-3p, target=R03G\_17409, score=3, range=797-815, str  
target 5' GGCCAGCUCAAAGUCCUGA 3'

query 3' CCGGUCGGGUUUCAGGGUU 5'  
query=miR9653a-3p, target=R03G\_01951, score=3, range=797-815, str  
target 5' GGCCAGCUCAAAGUCCUGA 3'

query 3' CCGGUCGGGUUUCAGGGUU 5'  
query=miR9653a-3p, target=R03G\_01194, score=3, range=797-815, str  
target 5' GGCCAGCUCAAAGUCCUGA 3'

query 3' CCGGUCGGGUUUCAGGGUU 5'  
query=miR9653a-3p, target=R03G\_09199, score=3, range=797-815, str  
target 5' GGCCAGCUCAAAGUCCUGA 3'

query 3' CCGGUCGGGUUUCAGGGUU 5'  
query=miR9653a-3p, target=R03G\_05916, score=3, range=797-815, str  
target 5' GGCCAGCUCAAAGUCCUGA 3'

query 3' CCGGUCGGGUUUCAGGGUU 5'  
query=miR9653a-3p, target=R03G\_15873, score=3, range=797-815, str  
target 5' GGCCAGCUCAAAGUCCUGA 3'

query 3' CCGGUCGGGUUUCAGGGUU 5'  
query=miR9653a-3p, target=R03G\_12526, score=3, range=797-815, str  
target 5' GGCCAGCUCAAAGUCCUGA 3'

query 3' CCGGUCGGGUUUCAGGGUU 5'  
query=miR9653a-3p, target=R03G\_13447, score=3, range=797-815, str  
target 5' GGCCAGCUCAAAGUCCUGA 3'

query 3' CCGGUCGGGUUUCAGGGUU 5'  
query=miR9653a-3p, target=R03G\_03987, score=3, range=797-815, str  
target 5' GGCCAGCUCAAAGUCCUGA 3'

query 3' CCGGUCGGGUUUCAGGGUU 5'  
query=miR9653a-3p, target=R03G\_11244, score=3, range=797-815, str  
target 5' GGCCAGCUCAAAGUCCUGA 3'



query 3' CCGGUCGGGUUUCAGGGUU 5'  
query=miR9653a-3p, target=R03G\_10044, score=3, range=797-815, str  
target 5' GGCCAGCUCAAAGUCCUGA 3'  
.....:  
query 3' CCGGUCGGGUUUCAGGGUU 5'  
query=miR9653a-3p, target=R03G\_01313, score=3, range=797-815, str  
target 5' GGCCAGCUCAAAGUCCUGA 3'  
.....:  
query 3' CCGGUCGGGUUUCAGGGUU 5'  
query=miR9653a-3p, target=R03G\_10720, score=3, range=797-815, str  
target 5' GGCCAGCUCAAAGUCCUGA 3'  
.....:  
query 3' CCGGUCGGGUUUCAGGGUU 5'  
query=miR9653a-3p, target=R03G\_01950, score=3, range=797-815, str  
target 5' GGCCAGCUCAAAGUCCUGA 3'  
.....:  
query 3' CCGGUCGGGUUUCAGGGUU 5'  
query=miR9653a-3p, target=R03G\_15154, score=3, range=797-815, str  
target 5' GGCCAGCUCAAAGUCCUGA 3'  
.....:  
query 3' CCGGUCGGGUUUCAGGGUU 5'  
query=miR9653a-3p, target=R03G\_03558, score=3, range=797-815, str  
target 5' GGCCAGCUCAAAGUCCUGA 3'  
.....:  
query 3' CCGGUCGGGUUUCAGGGUU 5'  
query=miR9653a-3p, target=R03G\_07994, score=3, range=797-815, str  
target 5' GGCCAGCUCAAAGUCCUGA 3'  
.....:  
query 3' CCGGUCGGGUUUCAGGGUU 5'  
query=miR9653a-3p, target=R03G\_07683, score=3, range=797-815, str  
target 5' GGCCAGCUCAAAGUCCUGA 3'  
.....:  
query 3' CCGGUCGGGUUUCAGGGUU 5'  
query=miR9653a-3p, target=R03G\_09924, score=3, range=797-815, str  
target 5' GGCCAGCUCAAAGUCCUGA 3'  
.....:  
query 3' CCGGUCGGGUUUCAGGGUU 5'  
query=miR9653a-3p, target=R03G\_11948, score=3, range=797-815, str  
target 5' GGCCAGCUCAAAGUCCUGA 3'  
.....:  
query 3' CCGGUCGGGUUUCAGGGUU 5'  
query=miR9653a-3p, target=R03G\_01735, score=3, range=797-815, str  
target 5' GGCCAGCUCAAAGUCCUGA 3'  
.....:  
query 3' CCGGUCGGGUUUCAGGGUU 5'

query=miR9653a-3p, target=R03G\_13706, score=3, range=755-773, str  
target 5' GGCCAGCUCAAAGUCCUGA 3'  
:~::~  
query 3' CCGGUCGGGUUUCAGGGUU 5'  
query=miR9653a-3p, target=R03G\_17211, score=3, range=797-815, str  
target 5' GGCCAGCUCAAAGUCCUGA 3'  
:~::~  
query 3' CCGGUCGGGUUUCAGGGUU 5'  
query=miR9653a-3p, target=R03G\_03617, score=3, range=797-815, str  
target 5' GGCCAGCUCAAAGUCCUGA 3'  
:~::~  
query 3' CCGGUCGGGUUUCAGGGUU 5'  
query=miR9653a-3p, target=R03G\_10805, score=3, range=806-824, str  
target 5' GGCCAGCCCAAUUCCCGA 3'  
:~::~  
query 3' CCGGUCGGGUUUCAGGGUU 5'  
query=miR9653a-3p, target=R03G\_01587, score=3, range=623-641, str  
target 5' GGCCUGCUCAAAGUCCCGA 3'  
:~::~  
query 3' CCGGUCGGGUUUCAGGGUU 5'  
query=miR9653a-3p, target=R03G\_17361, score=3, range=374-392, str  
target 5' GGCCUGCUCAAAGUCCCGA 3'  
:~::~  
query 3' CCGGUCGGGUUUCAGGGUU 5'  
query=miR9653a-3p, target=R03G\_08658, score=3, range=614-632, str  
target 5' GGCCUGCUCAAAGUCCCGA 3'  
:~::~  
query 3' CCGGUCGGGUUUCAGGGUU 5'  
query=miR9653a-3p, target=R03G\_14989, score=3, range=653-671, str  
target 5' GGCCUGCUCAAAGUCCCGA 3'  
:~::~  
query 3' CCGGUCGGGUUUCAGGGUU 5'  
query=miR9653a-3p, target=R03G\_11966, score=3, range=797-815, str  
target 5' GGCCAUCCCAAAGUCCUGA 3'  
:~::~  
query 3' CCGGUCGGGUUUCAGGGUU 5'  
query=miR9653a-3p, target=R03G\_13857, score=3, range=437-455, str  
target 5' GGCCUGCUCAAAGUCCCGA 3'  
:~::~  
query 3' CCGGUCGGGUUUCAGGGUU 5'  
query=miR9653a-3p, target=R03G\_05959, score=3, range=797-815, str  
target 5' GGCCAUCCCAAAGUCCUGA 3'  
:~::~  
query 3' CCGGUCGGGUUUCAGGGUU 5'  
query=miR9653a-3p, target=R03G\_05953, score=3, range=797-815, str



strand=1  
target 5' GGCUAUCCCAAAGUCCUGA 3'  
::::: :::::::::::::::  
query 3' CCGGUCGGGUUUCAGGGUU 5'  
query=miR9653a-3p, target=R03G\_07651, score=3.5, range=5193-5211,  
strand=1  
target 5' UGGUAGCUCAAAGUCCCAA 3'  
: .::::: :::::::::::::::  
query 3' CCGGUCGGGUUUCAGGGUU 5'  
query=miR9653a-3p, target=R03G\_05737, score=3.5, range=390-407,  
strand=-1  
target 5' GGAUAG-CCAAAGUCCCAA 3'  
:: .:: :::::::::::::::  
query 3' CCGGUCGGGUUUCAGGGUU 5'  
query=miR9653a-3p, target=R03G\_16377, score=4, range=122-140, str  
target 5' GGCCAGCUCAAAGUUCUGA 3'  
::::: :::::::::::::::  
query 3' CCGGUCGGGUUUCAGGGUU 5'  
query=miR9653a-3p, target=R03G\_16548, score=4, range=452-470, str  
target 5' UGCCAGCUCAAAGUCCUGA 3'  
::::: :::::::::::::::  
query 3' CCGGUCGGGUUUCAGGGUU 5'  
query=miR9653a-3p, target=R03G\_12186, score=4, range=806-824, str  
target 5' GGCCAGCUCAAAGUCCAGA 3'  
::::: ::::::::::::::: .:  
query 3' CCGGUCGGGUUUCAGGGUU 5'  
query=miR9653a-3p, target=R03G\_03599, score=4, range=806-824, str  
target 5' GGCCAGCUCAAAAUCCCGA 3'  
::::: ::::::::::::::: :::::::  
query 3' CCGGUCGGGUUUCAGGGUU 5'  
query=miR9653a-3p, target=R03G\_12196, score=4, range=728-746, str  
target 5' GGCCAGCUCAAAGUCCAGA 3'  
::::: ::::::::::::::: .:  
query 3' CCGGUCGGGUUUCAGGGUU 5'  
query=miR9653a-3p, target=R03G\_14620, score=4, range=242-260, str  
target 5' GGCCUGCUCAAAGUCCUGA 3'  
::::: ::::::::::::::: :::::::  
query 3' CCGGUCGGGUUUCAGGGUU 5'  
query=miR9653a-3p, target=R03G\_14987, score=4, range=461-479, str  
target 5' GGCCUGCUCAAAGUCCUGA 3'  
::::: ::::::::::::::: :::::::  
query 3' CCGGUCGGGUUUCAGGGUU 5'  
query=miR9653a-3p, target=R03G\_06721, score=4, range=611-629, str  
target 5' GGCCUGCUCAAAGUCCUGA 3'  
::::: ::::::::::::::: :::::::

query 3' CCGGUCGGGUUUCAGGGUU 5'  
query=miR9653a-3p, target=R03G\_03797, score=4, range=302-320, str  
target 5' GGCCUGCUCAAAGUCCUGA 3'  
:::: :::::::::::::::  
query 3' CCGGUCGGGUUUCAGGGUU 5'  
query=miR9653a-3p, target=R03G\_17293, score=4, range=614-632, str  
target 5' GGCCUGCUCAAAGUCCUGA 3'  
:::: :::::::::::::::  
query 3' CCGGUCGGGUUUCAGGGUU 5'  
query=miR9653a-3p, target=R03G\_04200, score=4, range=614-632, str  
target 5' GGCCUGCUCAAAGUCCUGA 3'  
:::: :::::::::::::::  
query 3' CCGGUCGGGUUUCAGGGUU 5'  
query=miR9653a-3p, target=R03G\_17436, score=4, range=614-632, str  
target 5' GGCCUGCUCAAAGUCCUGA 3'  
:::: :::::::::::::::  
query 3' CCGGUCGGGUUUCAGGGUU 5'  
query=miR9653a-3p, target=R03G\_04654, score=4, range=614-632, str  
target 5' GGCCUGCUCAAAGUCCUGA 3'  
:::: :::::::::::::::  
query 3' CCGGUCGGGUUUCAGGGUU 5'  
query=miR9653a-3p, target=R03G\_15672, score=4, range=614-632, str  
target 5' GGCCUGCUCAAAGUCCUGA 3'  
:::: :::::::::::::::  
query 3' CCGGUCGGGUUUCAGGGUU 5'  
query=miR9653a-3p, target=R03G\_11405, score=4, range=614-632, str  
target 5' GGCCUGCUCAAAGUCCUGA 3'  
:::: :::::::::::::::  
query 3' CCGGUCGGGUUUCAGGGUU 5'  
query=miR9653a-3p, target=R03G\_07689, score=4, range=614-632, str  
target 5' GGCCUGCUCAAAGUCCUGA 3'  
:::: :::::::::::::::  
query 3' CCGGUCGGGUUUCAGGGUU 5'  
query=miR9653a-3p, target=R03G\_07302, score=4, range=614-632, str  
target 5' GGCCUGCUCAAAGUCCUGA 3'  
:::: :::::::::::::::  
query 3' CCGGUCGGGUUUCAGGGUU 5'  
query=miR9653a-3p, target=R03G\_10224, score=4, range=614-632, str  
target 5' GGCCUGCUCAAAGUCCUGA 3'  
:::: :::::::::::::::  
query 3' CCGGUCGGGUUUCAGGGUU 5'  
query=miR9653a-3p, target=R03G\_00247, score=4, range=614-632, str  
target 5' GGCCUGCUCAAAGUCCUGA 3'  
:::: :::::::::::::::  
query 3' CCGGUCGGGUUUCAGGGUU 5'

query=miR9653a-3p, target=R03G\_12670, score=4, range=614-632, str  
target 5' GGCCUGCUCAAAGUCCUGA 3'  
:::: :::::::::::::::  
query 3' CCGGUCGGGUUUCAGGGUU 5'  
query=miR9653a-3p, target=R03G\_09944, score=4, range=614-632, str  
target 5' GGCCUGCUCAAAGUCCUGA 3'  
:::: :::::::::::::::  
query 3' CCGGUCGGGUUUCAGGGUU 5'  
query=miR9653a-3p, target=R03G\_03785, score=4, range=419-437, str  
target 5' GGCCUGCUCAAAGUCCUGA 3'  
:::: :::::::::::::::  
query 3' CCGGUCGGGUUUCAGGGUU 5'  
query=miR9653a-3p, target=R03G\_17204, score=4, range=677-695, str  
target 5' GGCCUGCUCAAAGUCCUGA 3'  
:::: :::::::::::::::  
query 3' CCGGUCGGGUUUCAGGGUU 5'  
query=miR9653a-3p, target=R03G\_08649, score=4, range=559-577, str  
target 5' GGCCUGCUCAAAGUCCUGA 3'  
:::: :::::::::::::::  
query 3' CCGGUCGGGUUUCAGGGUU 5'  
query=miR9653a-3p, target=R03G\_04207, score=4, range=797-815, str  
target 5' GGCCAUCCCAAAGUUCUGA 3'  
::::: :::::::::::::::  
query 3' CCGGUCGGGUUUCAGGGUU 5'  
query=miR9653a-3p, target=R03G\_10226, score=4, range=614-632, str  
target 5' GGCCUGCUCAAAGUCCUGA 3'  
:::: :::::::::::::::  
query 3' CCGGUCGGGUUUCAGGGUU 5'  
query=miR9653a-3p, target=R03G\_12082, score=4, range=692-710, str  
target 5' GGCCUGCUCAAAGUCCUGA 3'  
:::: :::::::::::::::  
query 3' CCGGUCGGGUUUCAGGGUU 5'  
query=miR9653a-3p, target=R03G\_14772, score=4, range=692-710, str  
target 5' GGCCUGCUCAAAGUCCUGA 3'  
:::: :::::::::::::::  
query 3' CCGGUCGGGUUUCAGGGUU 5'  
query=miR9653a-3p, target=R03G\_14972, score=4, range=728-746, str  
target 5' GGCCACCACAAAGUCCCGA 3'  
::::: : :::::::::::::::  
query 3' CCGGUCGGGUUUCAGGGUU 5'  
query=miR9653a-3p, target=R03G\_01942, score=4, range=794-812, str  
target 5' GGACAUCCCAAAGUCCUGA 3'  
:: :: :::::::::::::::  
query 3' CCGGUCGGGUUUCAGGGUU 5'  
query=miR9653a-3p, target=R03G\_09945, score=4, range=521-539, str

target 5' GGACAUCCCAAAGUCCUGA 3'  
:: :: :::::::::::::::  
query 3' CCGGUCGGGUUUCAGGGUU 5'  
query=miR9653a-3p, target=R03G\_09194, score=4, range=797-815, str  
target 5' GGACAUCCCAAAGUCCUGA 3'  
:: :: :::::::::::::::  
query 3' CCGGUCGGGUUUCAGGGUU 5'  
query=miR9653a-3p, target=R03G\_03612, score=4, range=284-302, str  
target 5' GGACUGCUCAAAGUCCCGA 3'  
:: : :::::::::::::::  
query 3' CCGGUCGGGUUUCAGGGUU 5'  
query=miR9653a-3p, target=R03G\_02961, score=4, range=284-302, str  
target 5' GGACUGCUCAAAGUCCCGA 3'  
:: : :::::::::::::::  
query 3' CCGGUCGGGUUUCAGGGUU 5'  
query=miR9653a-3p, target=R03G\_10457, score=4, range=148-165, str  
target 5' GAACAGCCCAAAG-CCCAA 3'  
: ::::::::::: :::::  
query 3' CCGGUCGGGUUUCAGGGUU 5'  
query=miR9653a-3p, target=R03G\_00639, score=4, range=174-193,  
strand=-1  
target 5' UGCCUGCCCAAAGUCCCAA 3'  
::: :::: ::::::::::::::  
query 3' CCGGUCGGG-UUUCAGGGUU 5'  
query=miR419, target=R03G\_17296, score=0, range=174-192, strand=1  
target 5' CUCACGUCAUCAUCCUCA 3'  
:::::::::::::::::::::  
query 3' GAGUGCAGUAGUAAGGAGU 5'  
query=miR419, target=R03G\_13948, score=2.5, range=1809-1827, stra  
target 5' CUCACCUCAUCAUUCUUCG 3'  
::::: :::::::::::::::  
query 3' GAGUGCAGUAGUAAGGAGU 5'  
query=miR419, target=R03G\_12214, score=3, range=947-966, strand=1  
target 5' CUCAACAUCAUCAUUUCUCA 3'  
::: :: :::::::::::::::  
query 3' GAG-UGCAGUAGUAAGGAGU 5'  
query=miR419, target=R03G\_16237, score=3, range=1366-1385, strand  
target 5' CUUAUAGUCAUCAUCCUCC 3'  
:..: :::::::::::::::  
query 3' GAGUG-CAGUAGUAAGGAGU 5'  
query=miR419, target=R03G\_04424, score=3, range=425-443, strand=-  
target 5' CUGCCGUCGUCAUCCUCA 3'  
:: :::::::::::::::  
query 3' GAGUGCAGUAGUAAGGAGU 5'  
query=miR419, target=R03G\_02333, score=3.5, range=120-138, strand

target 5' UUCACAUCAUCGUUCUUCA 3'  
.....  
query 3' GAGUGCAGUAGUAAGGAGU 5'  
query=miR419, target=R03G\_17067, score=3.5, range=1021-1040, stra  
target 5' UUCAAGUUCAUUUCCUCA 3'  
.... : .....  
query 3' GAGUGC-AGUAGUAAGGAGU 5'  
query=miR419, target=R03G\_13039, score=3.5, range=1728-1745, stra  
target 5' CUC-UGUCGUCAUCCUCC 3'  
... .....  
query 3' GAGUGCAGUAGUAAGGAGU 5'  
query=miR419, target=R03G\_01820, score=3.5, range=1471-1488, stra  
target 5' UUCA-GUCAUCAUCCCCA 3'  
.... ..... :  
query 3' GAGUGCAGUAGUAAGGAGU 5'  
query=miR419, target=R03G\_03632, score=3.5, range=1466-1483, stra  
target 5' CUCUCGUCAUCAUU-CUCG 3'  
... ..... :.  
query 3' GAGUGCAGUAGUAAGGAGU 5'  
query=miR419, target=R03G\_15326, score=3.5, range=68-85, strand=1  
target 5' CUUACAUCAUCA-UCCUCA 3'  
..... :  
query 3' GAGUGCAGUAGUAAGGAGU 5'  
query=miR419, target=R03G\_13329, score=3.5, range=276-293, strand  
target 5' CUC-UGUGAUCAUCCUCA 3'  
... .. :  
query 3' GAGUGCAGUAGUAAGGAGU 5'  
query=miR419, target=R03G\_05065, score=4, range=500-518, strand=1  
target 5' AACACGUCAUUUUCUUCA 3'  
..... :  
query 3' GAGUGCAGUAGUAAGGAGU 5'  
query=miR419, target=R03G\_17196, score=4, range=500-518, strand=1  
target 5' AACACGUCAUUUUCUUCA 3'  
..... :  
query 3' GAGUGCAGUAGUAAGGAGU 5'  
query=miR419, target=R03G\_14928, score=4, range=29-47, strand=1  
target 5' CUCGUGUCAUCAUUACUCU 3'  
..... :  
query 3' GAGUGCAGUAGUAAGGAGU 5'  
query=miR419, target=R03G\_14934, score=4, range=29-47, strand=1  
target 5' CUCGUGUCAUCAUUACUCU 3'  
..... :  
query 3' GAGUGCAGUAGUAAGGAGU 5'  
query=miR419, target=R03G\_02621, score=4, range=423-440, strand=1  
target 5' CUCA-GUCAUCGUUUUCA 3'



```
:::: :::::::::::::::
query 3' GAGUGCAGUAGUAAGGAGU 5'
query=miR419, target=R03G_16590, score=4, range=368-386, strand=1
target 5' UCCUGCCAUCAUCCUCA 3'
.:: .: :::::::::::::::
query 3' GAGUGCAGUAGUAAGGAGU 5'
query=miR419, target=R03G_06771, score=4, range=276-293, strand=1
target 5' CUCACGUCGU-AUCCUCC 3'
::::::::::: :::::::
query 3' GAGUGCAGUAGUAAGGAGU 5'
query=miR419, target=R03G_02782, score=4, range=392-411, strand=1
target 5' UAUACCGUCAUCAUCCUUA 3'
. .: :::::::::::::::
query 3' GAGU-GCAGUAGUAAGGAGU 5'
query=miR419, target=R03G_17114, score=4, range=473-491, strand=1
target 5' AUCAAGUCAUCAUUCAUCA 3'
::: ::::::::::::::: :::
query 3' GAGUGCAGUAGUAAGGAGU 5'
query=miR419, target=R03G_12716, score=4, range=269-287, strand=1
target 5' CUCAACUCAUUAUCCUCC 3'
:::: :::::::::::::::
query 3' GAGUGCAGUAGUAAGGAGU 5'
query=miR419, target=R03G_13887, score=4, range=465-483, strand=1
target 5' CUCUCAUCAUCAUCCCCA 3'
::: : ::::::::::::::: ::
query 3' GAGUGCAGUAGUAAGGAGU 5'
query=miR419, target=R03G_04821, score=4, range=339-356, strand=1
target 5' ACCAC-UCAUCAUCCUCC 3'
::: :::::::::::::::
query 3' GAGUGCAGUAGUAAGGAGU 5'
query=miR419, target=R03G_14305, score=4, range=452-470, strand=-
target 5' GUCACGUCAUCAUUCUUUU 3'
:::::::::::
query 3' GAGUGCAGUAGUAAGGAGU 5'
query=miR419, target=R03G_00234, score=4, range=1121-1139, strand
target 5' UCCAUAUCAUCAUUCUUCA 3'
. ::. :::::::::::::::
query 3' GAGUGCAGUAGUAAGGAGU 5'
query=miR419, target=R03G_12448, score=4, range=416-434, strand=-
target 5' CUGAAGUCAUCAUUCUUCU 3'
:: : :::::::::::::::
query 3' GAGUGCAGUAGUAAGGAGU 5'
query=miR419, target=R03G_01815, score=4, range=678-695, strand=-
target 5' CUCAAGUCAUCA-UCUUCA 3'
:::: ::::::::::::::: :::::::
```

query 3' GAGUGCAGUAGUAAGGAGU 5'  
query=miR419, target=R03G\_10948, score=4, range=747-764, strand=-  
target 5' UCCAUGUCAU-AUUCCUCA 3'  
. :.:.:.:.: :.:.:.:.:  
query 3' GAGUGCAGUAGUAAGGAGU 5'  
query=miR7734-3p, target=R03G\_13273, score=0, range=647-668, stra  
target 5' CGUUGAAUGUGGACUGGUUCCA 3'  
:.:.:.:.:.:.:.:.:.:.:  
query 3' GCAACUACACCCUGACCAAGGU 5'  
query=miR7734-3p, target=R03G\_10217, score=0, range=647-668, stra  
target 5' CGUUGAAUGUGGACUGGUUCCA 3'  
:.:.:.:.:.:.:.:.:.:.:  
query 3' GCAACUACACCCUGACCAAGGU 5'  
query=miR7734-3p, target=R03G\_16749, score=0, range=647-668, stra  
target 5' CGUUGAAUGUGGACUGGUUCCA 3'  
:.:.:.:.:.:.:.:.:.:.:  
query 3' GCAACUACACCCUGACCAAGGU 5'  
query=miR7734-3p, target=R03G\_13145, score=0, range=647-668, stra  
target 5' CGUUGAAUGUGGACUGGUUCCA 3'  
:.:.:.:.:.:.:.:.:.:.:  
query 3' GCAACUACACCCUGACCAAGGU 5'  
query=miR7734-3p, target=R03G\_11969, score=0, range=647-668, stra  
target 5' CGUUGAAUGUGGACUGGUUCCA 3'  
:.:.:.:.:.:.:.:.:.:.:  
query 3' GCAACUACACCCUGACCAAGGU 5'  
query=miR7734-3p, target=R03G\_07698, score=0, range=647-668, stra  
target 5' CGUUGAAUGUGGACUGGUUCCA 3'  
:.:.:.:.:.:.:.:.:.:.:  
query 3' GCAACUACACCCUGACCAAGGU 5'  
query=miR7734-3p, target=R03G\_11237, score=0, range=647-668, stra  
target 5' CGUUGAAUGUGGACUGGUUCCA 3'  
:.:.:.:.:.:.:.:.:.:.:  
query 3' GCAACUACACCCUGACCAAGGU 5'  
query=miR7734-3p, target=R03G\_04683, score=0, range=647-668, stra  
target 5' CGUUGAAUGUGGACUGGUUCCA 3'  
:.:.:.:.:.:.:.:.:.:.:  
query 3' GCAACUACACCCUGACCAAGGU 5'  
query=miR7734-3p, target=R03G\_11409, score=0, range=647-668, stra  
target 5' CGUUGAAUGUGGACUGGUUCCA 3'  
:.:.:.:.:.:.:.:.:.:.:  
query 3' GCAACUACACCCUGACCAAGGU 5'  
query=miR7734-3p, target=R03G\_04212, score=0, range=647-668, stra  
target 5' CGUUGAAUGUGGACUGGUUCCA 3'  
:.:.:.:.:.:.:.:.:.:.:  
query 3' GCAACUACACCCUGACCAAGGU 5'

query=miR7734-3p, target=R03G\_14550, score=0, range=647-668, stra  
target 5' CGUUGAAUGUGGACUGGUUCCA 3'  
::::::::::::::::::::::::::  
query 3' GCAACUUACACCUGACCAAGGU 5'  
query=miR7734-3p, target=R03G\_15898, score=0, range=647-668, stra  
target 5' CGUUGAAUGUGGACUGGUUCCA 3'  
::::::::::::::::::::::::::  
query 3' GCAACUUACACCUGACCAAGGU 5'  
query=miR7734-3p, target=R03G\_09930, score=0, range=647-668, stra  
target 5' CGUUGAAUGUGGACUGGUUCCA 3'  
::::::::::::::::::::::::::  
query 3' GCAACUUACACCUGACCAAGGU 5'  
query=miR7734-3p, target=R03G\_06731, score=0, range=647-668, stra  
target 5' CGUUGAAUGUGGACUGGUUCCA 3'  
::::::::::::::::::::::::::  
query 3' GCAACUUACACCUGACCAAGGU 5'  
query=miR7734-3p, target=R03G\_07307, score=0, range=647-668, stra  
target 5' CGUUGAAUGUGGACUGGUUCCA 3'  
::::::::::::::::::::::::::  
query 3' GCAACUUACACCUGACCAAGGU 5'  
query=miR7734-3p, target=R03G\_09601, score=0, range=647-668, stra  
target 5' CGUUGAAUGUGGACUGGUUCCA 3'  
::::::::::::::::::::::::::  
query 3' GCAACUUACACCUGACCAAGGU 5'  
query=miR7734-3p, target=R03G\_11538, score=0, range=647-668, stra  
target 5' CGUUGAAUGUGGACUGGUUCCA 3'  
::::::::::::::::::::::::::  
query 3' GCAACUUACACCUGACCAAGGU 5'  
query=miR7734-3p, target=R03G\_07721, score=0, range=647-668, stra  
target 5' CGUUGAAUGUGGACUGGUUCCA 3'  
::::::::::::::::::::::::::  
query 3' GCAACUUACACCUGACCAAGGU 5'  
query=miR7734-3p, target=R03G\_01728, score=0, range=605-626, stra  
target 5' CGUUGAAUGUGGACUGGUUCCA 3'  
::::::::::::::::::::::::::  
query 3' GCAACUUACACCUGACCAAGGU 5'  
query=miR7734-3p, target=R03G\_16827, score=0, range=647-668, stra  
target 5' CGUUGAAUGUGGACUGGUUCCA 3'  
::::::::::::::::::::::::::  
query 3' GCAACUUACACCUGACCAAGGU 5'  
query=miR7734-3p, target=R03G\_07980, score=0, range=35-56, strand  
target 5' CGUUGAAUGUGGACUGGUUCCA 3'  
::::::::::::::::::::::::::  
query 3' GCAACUUACACCUGACCAAGGU 5'  
query=miR7734-3p, target=R03G\_07737, score=0, range=8-29, strand=



query 3' GCAACUUACACCUGACCAAGGU 5'  
query=miR7734-3p, target=R03G\_17358, score=4, range=866-887, str  
target 5' CGUUGAAUGUCGAUUGGUUUCA 3'

query 3' GCAACUUACACCUGACCAAGGU 5'  
query=miR7734-3p, target=R03G\_07686, score=4, range=866-887, str  
target 5' CGUUGAAUGUCGAUUGGUUUCA 3'

query 3' GCAACUUACACCUGACCAAGGU 5'  
query=miR7734-3p, target=R03G\_14710, score=4, range=866-887, str  
target 5' CGUUGAAUGUCGAUUGGUUUCA 3'

query 3' GCAACUUACACCUGACCAAGGU 5'  
query=miR7734-3p, target=R03G\_17385, score=4, range=866-887, str  
target 5' CGUUGAAUGUCGAUUGGUUUCA 3'

query 3' GCAACUUACACCUGACCAAGGU 5'  
query=miR7734-3p, target=R03G\_12009, score=4, range=866-887, str  
target 5' CGUUGAAUGUCGAUUGGUUUCA 3'

query 3' GCAACUUACACCUGACCAAGGU 5'  
query=miR7734-3p, target=R03G\_09940, score=4, range=866-887, str  
target 5' CGUUGAAUGUCGAUUGGUUUCA 3'

query 3' GCAACUUACACCUGACCAAGGU 5'  
query=miR7734-3p, target=R03G\_07976, score=4, range=863-884, str  
target 5' CGUUGAAUGUCGAUUGGUUUCA 3'

query 3' GCAACUUACACCUGACCAAGGU 5'  
query=miR7734-3p, target=R03G\_10725, score=4, range=830-851, str  
target 5' CGUUGAAUGUCGAUUGGUUUCA 3'

query 3' GCAACUUACACCUGACCAAGGU 5'  
query=miR7734-3p, target=R03G\_03580, score=4, range=791-812, str  
target 5' CGUUGAAUGUCGAUUGGUUUCA 3'

query 3' GCAACUUACACCUGACCAAGGU 5'  
query=miR7734-3p, target=R03G\_17441, score=4, range=593-614, str  
target 5' CGUUGAAUGUCGAUUGGUUUCA 3'

query 3' GCAACUUACACCUGACCAAGGU 5'  
query=miR7734-3p, target=R03G\_13747, score=4, range=866-887, str  
target 5' CGUUGAAUGUCGAUUGGUUUCA 3'

query 3' GCAACUACACCGACCAAGGU 5'  
query=miR7734-3p, target=R03G\_08042, score=4, range=398-419, strand=1  
target 5' CGUUGAAUGUCGAUUGGUUUCA 3'  
.....  
query 3' GCAACUACACCGACCAAGGU 5'  
query=miR7734-3p, target=R03G\_07294, score=4, range=467-488, strand=1  
target 5' CGUUGAAUGUCGAUUGGUUUCA 3'  
.....  
query 3' GCAACUACACCGACCAAGGU 5'  
query=miR7734-3p, target=R03G\_05631, score=4, range=866-887, strand=1  
target 5' CGUUGAAUGUCGAUUGGUUUCA 3'  
.....  
query 3' GCAACUACACCGACCAAGGU 5'  
query=miR7734-3p, target=R03G\_07130, score=4, range=770-791, strand=1  
target 5' CGUUGAAUGUCGAUUGGUUUCA 3'  
.....  
query 3' GCAACUACACCGACCAAGGU 5'  
query=miR7734-3p, target=R03G\_16739, score=4, range=866-887, strand=1  
target 5' CGUUGAAUGUCGAUUGGUUUCA 3'  
.....  
query 3' GCAACUACACCGACCAAGGU 5'  
query=miR7734-3p, target=R03G\_09192, score=4, range=866-887, strand=1  
target 5' CGUUGAAUGUCGAUUGGUUUCA 3'  
.....  
query 3' GCAACUACACCGACCAAGGU 5'  
query=miR7734-3p, target=R03G\_00693, score=4, range=344-365, strand=1  
target 5' CGUUGAAUGUCGAUUGGUUUCA 3'  
.....  
query 3' GCAACUACACCGACCAAGGU 5'  
query=miR6477, target=R03G\_16897, score=0, range=93-110, strand=1  
target 5' AUCAUCCUCUACUGUUCA 3'  
.....  
query 3' UAGUAGGAGAUGACAAGU 5'  
query=miR6477, target=R03G\_17215, score=0, range=93-110, strand=1  
target 5' AUCAUCCUCUACUGUUCA 3'  
.....  
query 3' UAGUAGGAGAUGACAAGU 5'  
query=miR6477, target=R03G\_03109, score=0, range=93-110, strand=1  
target 5' AUCAUCCUCUACUGUUCA 3'  
.....  
query 3' UAGUAGGAGAUGACAAGU 5'  
query=miR6477, target=R03G\_10235, score=0, range=93-110, strand=1  
target 5' AUCAUCCUCUACUGUUCA 3'  
.....  
query 3' UAGUAGGAGAUGACAAGU 5'

query=miR6477, target=R03G\_03615, score=0, range=93-110, strand=1  
target 5' AUCAUCCUCUACUGUUCA 3'  
:::::::::::::::::::  
query 3' UAGUAGGAGAUGACAAGU 5'  
query=miR6477, target=R03G\_01322, score=0, range=93-110, strand=1  
target 5' AUCAUCCUCUACUGUUCA 3'  
:::::::::::::::::::  
query 3' UAGUAGGAGAUGACAAGU 5'  
query=miR6477, target=R03G\_06423, score=0, range=93-110, strand=1  
target 5' AUCAUCCUCUACUGUUCA 3'  
:::::::::::::::::::  
query 3' UAGUAGGAGAUGACAAGU 5'  
query=miR6477, target=R03G\_09499, score=0, range=93-110, strand=1  
target 5' AUCAUCCUCUACUGUUCA 3'  
:::::::::::::::::::  
query 3' UAGUAGGAGAUGACAAGU 5'  
query=miR6477, target=R03G\_06441, score=0, range=93-110, strand=1  
target 5' AUCAUCCUCUACUGUUCA 3'  
:::::::::::::::::::  
query 3' UAGUAGGAGAUGACAAGU 5'  
query=miR6477, target=R03G\_01956, score=0, range=93-110, strand=1  
target 5' AUCAUCCUCUACUGUUCA 3'  
:::::::::::::::::::  
query 3' UAGUAGGAGAUGACAAGU 5'  
query=miR6477, target=R03G\_05336, score=0, range=93-110, strand=1  
target 5' AUCAUCCUCUACUGUUCA 3'  
:::::::::::::::::::  
query 3' UAGUAGGAGAUGACAAGU 5'  
query=miR6477, target=R03G\_07303, score=0, range=93-110, strand=1  
target 5' AUCAUCCUCUACUGUUCA 3'  
:::::::::::::::::::  
query 3' UAGUAGGAGAUGACAAGU 5'  
query=miR6477, target=R03G\_14359, score=0, range=93-110, strand=1  
target 5' AUCAUCCUCUACUGUUCA 3'  
:::::::::::::::::::  
query 3' UAGUAGGAGAUGACAAGU 5'  
query=miR6477, target=R03G\_00681, score=0, range=93-110, strand=1  
target 5' AUCAUCCUCUACUGUUCA 3'  
:::::::::::::::::::  
query 3' UAGUAGGAGAUGACAAGU 5'  
query=miR6477, target=R03G\_17285, score=0, range=93-110, strand=1  
target 5' AUCAUCCUCUACUGUUCA 3'  
:::::::::::::::::::  
query 3' UAGUAGGAGAUGACAAGU 5'  
query=miR6477, target=R03G\_09483, score=0, range=93-110, strand=1







query 3' UAGUAGGAGAUGACAAGU 5'  
query=miR6477, target=R03G\_11773, score=2, range=93-110, strand=1  
target 5' AUCAUCCUCCACUGUUCA 3'  
.....  
query 3' UAGUAGGAGAUGACAAGU 5'  
query=miR6477, target=R03G\_11401, score=2, range=93-110, strand=1  
target 5' AUCAUCCUCCACUGUUCA 3'  
.....  
query 3' UAGUAGGAGAUGACAAGU 5'  
query=miR6477, target=R03G\_16555, score=2, range=93-110, strand=1  
target 5' AUCAUCCUCCACUGUUCA 3'  
.....  
query 3' UAGUAGGAGAUGACAAGU 5'  
query=miR6477, target=R03G\_03571, score=2, range=93-110, strand=1  
target 5' AUCAUCCUCUACUGUACA 3'  
.....  
query 3' UAGUAGGAGAUGACAAGU 5'  
query=miR6477, target=R03G\_13848, score=2, range=93-110, strand=1  
target 5' AUCAUCCUCCACUGUUCA 3'  
.....  
query 3' UAGUAGGAGAUGACAAGU 5'  
query=miR6477, target=R03G\_01902, score=2.5, range=354-371, stran  
target 5' GUCUUCUUCUACUGUUCA 3'  
... ..  
query 3' UAGUAGGAGAUGACAAGU 5'  
query=miR6477, target=R03G\_16099, score=3, range=747-764, strand=  
target 5' AUCAUCUUCUACUGAUCA 3'  
.....  
query 3' UAGUAGGAGAUGACAAGU 5'  
query=miR6477, target=R03G\_08661, score=3, range=93-110, strand=1  
target 5' AUCAUCCUCCACUGUUUA 3'  
.....  
query 3' UAGUAGGAGAUGACAAGU 5'  
query=miR6477, target=R03G\_13605, score=3, range=1012-1028, stran  
target 5' AUC-UCUUCUGCUGUUCA 3'  
... ..  
query 3' UAGUAGGAGAUGACAAGU 5'  
query=miR6477, target=R03G\_02290, score=3, range=76-92, strand=1  
target 5' AUC-UCUUCUGCUGUUCA 3'  
... ..  
query 3' UAGUAGGAGAUGACAAGU 5'  
query=miR6477, target=R03G\_10445, score=3, range=474-490, strand=  
target 5' UUCAUCCUCUACUG-UCA 3'  
.....  
query 3' UAGUAGGAGAUGACAAGU 5'



target 5' GUUCUCCUUUACUGUUCG 3'  
... ..  
query 3' UAGUAGGAGAUGACAAGU 5'  
query=miR6477, target=R03G\_04535, score=3.5, range=2019-2036, str  
target 5' CUCAUCCUCUACUUAUUCG 3'  
..... : ..  
query 3' UAGUAGGAGAUGACAAGU 5'  
query=miR6477, target=R03G\_14091, score=3.5, range=175-192, stran  
target 5' ACCGUCCUUUACUGUUC 3'  
: ..  
query 3' UAGUAGGAGAUGACAAGU 5'  
query=miR6477, target=R03G\_11057, score=3.5, range=53-71, strand=  
target 5' GUCAUGCCUCUACUGUUUC 3'  
.....  
query 3' UAGUA-GGAGAUGACAAGU 5'  
query=miR6477, target=R03G\_08425, score=3.5, range=577-593, stran  
target 5' AUU-UUCUCUAUUGUUCA 3'  
.. ..  
query 3' UAGUAGGAGAUGACAAGU 5'  
query=miR6477, target=R03G\_11337, score=3.5, range=217-234, stran  
target 5' AAGGUCCUCUAUUGUUCA 3'  
: ..  
query 3' UAGUAGGAGAUGACAAGU 5'  
query=miR6477, target=R03G\_15299, score=3.5, range=911-929, stran  
target 5' GUCAUACCUCUCCUGUUCA 3'  
.....  
query 3' UAGUA-GGAGAUGACAAGU 5'  
query=miR6477, target=R03G\_00043, score=3.5, range=46-63, strand=  
target 5' AAUAACCUCUACUGUUCU 3'  
: . : ..  
query 3' UAGUAGGAGAUGACAAGU 5'  
query=miR6477, target=R03G\_09501, score=3.5, range=988-1004, stra  
target 5' AUC-UCCUCUUCUGUUCG 3'  
... ..  
query 3' UAGUAGGAGAUGACAAGU 5'  
query=miR6477, target=R03G\_13886, score=3.5, range=749-767, stran  
target 5' GUCAUCUUGCUCUACUGUUCA 3'  
.....  
query 3' UAGUAGGA-GAUGACAAGU 5'  
query=miR6477, target=R03G\_08005, score=3.5, range=400-416, stran  
target 5' AUCAUCUUCU-CUGUUCG 3'  
.....  
query 3' UAGUAGGAGAUGACAAGU 5'  
query=miR6477, target=R03G\_14023, score=3.5, range=598-615, stran  
target 5' AUCGUCUUCUACUGUUUC 3'

.....  
query 3' UAGUAGGAGAUGACAAGU 5'  
query=miR6477, target=R03G\_08882, score=3.5, range=3155-3173,  
strand=-1  
target 5' CUCAUCCCUCUACUGUUUG 3'  
:::: :.....  
query 3' UAGUA-GGAGAUGACAAGU 5'  
query=miR6477, target=R03G\_13132, score=3.5, range=889-905, stran  
target 5' AUU-UCCUCUGCUGUUC 3'  
:: :.....  
query 3' UAGUAGGAGAUGACAAGU 5'  
query=miR6477, target=R03G\_09535, score=3.5, range=1014-1032,  
strand=-1  
target 5' AUUAUGCUCAUACUGUUCA 3'  
:::: : : :.....  
query 3' UAGUAGGAG-AUGACAAGU 5'  
query=miR6477, target=R03G\_06479, score=4, range=4041-4058, stran  
target 5' AUCGUCGUCUGCUGUUCG 3'  
:::: : : :.....  
query 3' UAGUAGGAGAUGACAAGU 5'  
query=miR6477, target=R03G\_11450, score=4, range=297-315, strand=  
target 5' UUCAUCCUCUAUUGUAUCA 3'  
:::: : : :.....  
query 3' UAGUAGGAGAUGACA-AGU 5'  
query=miR6477, target=R03G\_09842, score=4, range=2061-2078, stran  
target 5' UUCAACUUCUAUUGUUCA 3'  
:: : : :.....  
query 3' UAGUAGGAGAUGACAAGU 5'  
query=miR6477, target=R03G\_16482, score=4, range=105-122, strand=  
target 5' AUCAUCCUCUACUUUACA 3'  
:::: : : :.....  
query 3' UAGUAGGAGAUGACAAGU 5'  
query=miR6477, target=R03G\_02069, score=4, range=1033-1049, stran  
target 5' AUC-UCUUCUGCUGUUUA 3'  
:: : : :.....  
query 3' UAGUAGGAGAUGACAAGU 5'  
query=miR6477, target=R03G\_11156, score=4, range=181-197, strand=  
target 5' AUU-UCCUUUACUGUUUG 3'  
:: : : :.....  
query 3' UAGUAGGAGAUGACAAGU 5'  
query=miR6477, target=R03G\_02593, score=4, range=175-192, strand=  
target 5' UGCCUUCUCUACUGUUCA 3'  
: : :.....  
query 3' UAGUAGGAGAUGACAAGU 5'  
query=miR6477, target=R03G\_06092, score=4, range=1884-1900, stran

target 5' AUCUUCCUCUGCUG-UCA 3'  
::: ::::::::::: :::  
query 3' UAGUAGGAGAUGACAAGU 5'  
query=miR6477, target=R03G\_09997, score=4, range=1102-1119, stran  
target 5' AUAUCCUUUACUGUUCU 3'  
:: ::::::::::: ::  
query 3' UAGUAGGAGAUGACAAGU 5'  
query=miR6477, target=R03G\_16107, score=4, range=1572-1588, stran  
target 5' AUCA-CCACUGCUGUUCA 3'  
:::: :: ::::::::::: ::  
query 3' UAGUAGGAGAUGACAAGU 5'  
query=miR6477, target=R03G\_01072, score=4, range=2479-2495, stran  
target 5' UACA-CUUCUACUGUUCA 3'  
:: ::::::::::: ::  
query 3' UAGUAGGAGAUGACAAGU 5'  
query=miR6477, target=R03G\_10142, score=4, range=1542-1558, stran  
target 5' CUC-UCCUCUCCUGUUCA 3'  
:: ::::::::::: ::  
query 3' UAGUAGGAGAUGACAAGU 5'  
query=miR6477, target=R03G\_03107, score=4, range=1544-1560, stran  
target 5' CUC-UCCUCUCCUGUUCA 3'  
:: ::::::::::: ::  
query 3' UAGUAGGAGAUGACAAGU 5'  
query=miR6477, target=R03G\_04143, score=4, range=706-722, strand=  
target 5' AGCAU-CUCUACUGUUC 3'  
: ::: ::::::::::: ::  
query 3' UAGUAGGAGAUGACAAGU 5'  
query=miR6477, target=R03G\_00987, score=4, range=177-194, strand=  
target 5' CUCAUCUUUUGCUGUUCA 3'  
::::::::: ::::::::::: ::  
query 3' UAGUAGGAGAUGACAAGU 5'  
query=miR6477, target=R03G\_08255, score=4, range=87-105, strand=-  
target 5' AUCAUCUUUACUGUCUCA 3'  
::::::::: ::::::::::: ::  
query 3' UAGUAGGAGAUGACA-AGU 5'  
query=miR6477, target=R03G\_01827, score=4, range=105-123, strand=  
target 5' AUCAUCUUCUACUUGUUCU 3'  
::::::::: ::::::::::: ::  
query 3' UAGUAGGAGAUG-ACAAGU 5'  
query=miR6477, target=R03G\_14674, score=4, range=284-300, strand=  
target 5' AUCAUCCUUUACU-UUUA 3'  
::::::::: ::::::::::: ::  
query 3' UAGUAGGAGAUGACAAGU 5'  
query=miR6477, target=R03G\_01665, score=4, range=428-444, strand=  
target 5' AUCAUUCUCUGCU-UUCA 3'

:::::.....: :  
query 3' UAGUAGGAGAUGACAAGU 5'  
query=miR6477, target=R03G\_00507, score=4, range=481-498, strand=  
target 5' AUCAUCCUCUUCUGUUAA 3'  
:::::.....: :  
query 3' UAGUAGGAGAUGACAAGU 5'  
query=miR6477, target=R03G\_14152, score=4, range=1442-1459, stran  
target 5' AUAUCUUCUACGGUUCA 3'  
:: :.....: :  
query 3' UAGUAGGAGAUGACAAGU 5'  
query=miR6477, target=R03G\_12763, score=4, range=3051-3069, stran  
target 5' AUCCAUCCACUGCUGUUCA 3'  
:: :.....: :  
query 3' UA-GUAGGAGAUGACAAGU 5'  
query=miR6477, target=R03G\_09843, score=4, range=1781-1798, stran  
target 5' AGCAAUCUUUACUGUUCA 3'  
: : :.....: :  
query 3' UAGUAGGAGAUGACAAGU 5'  
query=miR6477, target=R03G\_12344, score=4, range=904-921, strand=  
target 5' AUAACCCUCUACUGUUUU 3'  
:: : :.....: :  
query 3' UAGUAGGAGAUGACAAGU 5'  
query=miR6477, target=R03G\_17111, score=4, range=691-707, strand=  
target 5' GUU-UCCUCUACUGUGCA 3'  
.. :.....: :  
query 3' UAGUAGGAGAUGACAAGU 5'  
query=miR6477, target=R03G\_13627, score=4, range=434-450, strand=  
target 5' ACCAUCCUCUACU-UUCU 3'  
: :.....: :  
query 3' UAGUAGGAGAUGACAAGU 5'  
query=miR3476-5p, target=R03G\_07738, score=0, range=378-398, stra  
target 5' GCAGCAGCAGCACCCAGUUCA 3'  
:.....: :  
query 3' CGUCGUCGUCGUGGGUCAAGU 5'  
query=miR3476-5p, target=R03G\_01726, score=0, range=372-392, stra  
target 5' GCAGCAGCAGCACCCAGUUCA 3'  
:.....: :  
query 3' CGUCGUCGUCGUGGGUCAAGU 5'  
query=miR3476-5p, target=R03G\_11537, score=0, range=369-389, stra  
target 5' GCAGCAGCAGCACCCAGUUCA 3'  
:.....: :  
query 3' CGUCGUCGUCGUGGGUCAAGU 5'  
query=miR3476-5p, target=R03G\_11236, score=0, range=369-389, stra  
target 5' GCAGCAGCAGCACCCAGUUCA 3'  
:.....: :

query 3' CGUCGUCGUCGUGGGUCAAGU 5'  
query=miR3476-5p, target=R03G\_07981, score=0, range=327-347, str  
target 5' GCAGCAGCAGCACCCAGUUCA 3'  
.....  
query 3' CGUCGUCGUCGUGGGUCAAGU 5'  
query=miR3476-5p, target=R03G\_07696, score=0, range=327-347, str  
target 5' GCAGCAGCAGCACCCAGUUCA 3'  
.....  
query 3' CGUCGUCGUCGUGGGUCAAGU 5'  
query=miR3476-5p, target=R03G\_06730, score=0, range=327-347, str  
target 5' GCAGCAGCAGCACCCAGUUCA 3'  
.....  
query 3' CGUCGUCGUCGUGGGUCAAGU 5'  
query=miR3476-5p, target=R03G\_07720, score=0, range=327-347, str  
target 5' GCAGCAGCAGCACCCAGUUCA 3'  
.....  
query 3' CGUCGUCGUCGUGGGUCAAGU 5'  
query=miR3476-5p, target=R03G\_04211, score=0, range=327-347, str  
target 5' GCAGCAGCAGCACCCAGUUCA 3'  
.....  
query 3' CGUCGUCGUCGUGGGUCAAGU 5'  
query=miR3476-5p, target=R03G\_09602, score=0, range=327-347, str  
target 5' GCAGCAGCAGCACCCAGUUCA 3'  
.....  
query 3' CGUCGUCGUCGUGGGUCAAGU 5'  
query=miR3476-5p, target=R03G\_07306, score=0, range=327-347, str  
target 5' GCAGCAGCAGCACCCAGUUCA 3'  
.....  
query 3' CGUCGUCGUCGUGGGUCAAGU 5'  
query=miR3476-5p, target=R03G\_14551, score=0, range=327-347, str  
target 5' GCAGCAGCAGCACCCAGUUCA 3'  
.....  
query 3' CGUCGUCGUCGUGGGUCAAGU 5'  
query=miR3476-5p, target=R03G\_09929, score=0, range=327-347, str  
target 5' GCAGCAGCAGCACCCAGUUCA 3'  
.....  
query 3' CGUCGUCGUCGUGGGUCAAGU 5'  
query=miR3476-5p, target=R03G\_15897, score=0, range=327-347, str  
target 5' GCAGCAGCAGCACCCAGUUCA 3'  
.....  
query 3' CGUCGUCGUCGUGGGUCAAGU 5'  
query=miR3476-5p, target=R03G\_09603, score=0, range=369-389, str  
target 5' GCAGCAGCAGCACCCAGUUCA 3'  
.....  
query 3' CGUCGUCGUCGUGGGUCAAGU 5'



query=miR3476-5p, target=R03G\_10218, score=0, range=348-368, str  
target 5' GCAGCAGCAGCACCCAGUUCA 3'  
::::::::::::::::::::  
query 3' CGUCGUCGUCGUGGGUCAAGU 5'  
query=miR3476-5p, target=R03G\_16748, score=0, range=327-347, str  
target 5' GCAGCAGCAGCACCCAGUUCA 3'  
::::::::::::::::::::  
query 3' CGUCGUCGUCGUGGGUCAAGU 5'  
query=miR3476-5p, target=R03G\_04679, score=0, range=297-317, str  
target 5' GCAGCAGCAGCACCCAGUUCA 3'  
::::::::::::::::::::  
query 3' CGUCGUCGUCGUGGGUCAAGU 5'  
query=miR3476-5p, target=R03G\_11977, score=0, range=291-311, str  
target 5' GCAGCAGCAGCACCCAGUUCA 3'  
::::::::::::::::::::  
query 3' CGUCGUCGUCGUGGGUCAAGU 5'  
query=miR3476-5p, target=R03G\_02228, score=0, range=327-347, str  
target 5' GCAGCAGCAGCACCCAGUUCA 3'  
::::::::::::::::::::  
query 3' CGUCGUCGUCGUGGGUCAAGU 5'  
query=miR3476-5p, target=R03G\_10041, score=1, range=357-377, str  
target 5' GCAGCAGCAGCAUCCAGUUCA 3'  
::::::::::::::::::::  
query 3' CGUCGUCGUCGUGGGUCAAGU 5'  
query=miR3476-5p, target=R03G\_17248, score=1, range=357-377, str  
target 5' GCAGCAGCAGCAUCCAGUUCA 3'  
::::::::::::::::::::  
query 3' CGUCGUCGUCGUGGGUCAAGU 5'  
query=miR3476-5p, target=R03G\_15147, score=1, range=321-341, str  
target 5' GCAGCAGCAGCAUCCAGUUCA 3'  
::::::::::::::::::::  
query 3' CGUCGUCGUCGUGGGUCAAGU 5'  
query=miR3476-5p, target=R03G\_03584, score=1, range=285-305, str  
target 5' GCAGCAGCAGCAUCCAGUUCA 3'  
::::::::::::::::::::  
query 3' CGUCGUCGUCGUGGGUCAAGU 5'  
query=miR3476-5p, target=R03G\_15890, score=1, range=357-377, str  
target 5' GCAGCAGCAGCAUCCAGUUCA 3'  
::::::::::::::::::::  
query 3' CGUCGUCGUCGUGGGUCAAGU 5'  
query=miR3476-5p, target=R03G\_13146, score=1, range=357-377, str  
target 5' GCAGCAGCAGCAUCCAGUUCA 3'  
::::::::::::::::::::  
query 3' CGUCGUCGUCGUGGGUCAAGU 5'  
query=miR3476-5p, target=R03G\_17256, score=1, range=354-374, str







query 3' CUUCUUUGUACGAAUACCUCCU 5'  
query=miR7719-5p, target=R03G\_14363, score=0, range=483-504, stra  
target 5' GAAGAAACAUGCUUAUGGAGGA 3'

query 3' CUUCUUUGUACGAAUACCUCCU 5'  
query=miR7719-5p, target=R03G\_10774, score=0, range=492-513, stra  
target 5' GAAGAAACAUGCUUAUGGAGGA 3'

query 3' CUUCUUUGUACGAAUACCUCCU 5'  
query=miR7719-5p, target=R03G\_13863, score=0, range=225-246, stra  
target 5' GAAGAAACAUGCUUAUGGAGGA 3'

query 3' CUUCUUUGUACGAAUACCUCCU 5'  
query=miR7719-5p, target=R03G\_13755, score=0, range=525-546, stra  
target 5' GAAGAAACAUGCUUAUGGAGGA 3'

query 3' CUUCUUUGUACGAAUACCUCCU 5'  
query=miR7719-5p, target=R03G\_08849, score=0, range=525-546, stra  
target 5' GAAGAAACAUGCUUAUGGAGGA 3'

query 3' CUUCUUUGUACGAAUACCUCCU 5'  
query=miR7719-5p, target=R03G\_14979, score=0, range=525-546, stra  
target 5' GAAGAAACAUGCUUAUGGAGGA 3'

query 3' CUUCUUUGUACGAAUACCUCCU 5'  
query=miR7719-5p, target=R03G\_17276, score=0.5, range=615-636,  
strand=1  
target 5' GAGGAAACAUGCUUAUGGAGGA 3'

query 3' CUUCUUUGUACGAAUACCUCCU 5'  
query=miR7719-5p, target=R03G\_13741, score=0.5, range=525-546,  
strand=1  
target 5' GAAGAAACGUGCUUAUGGAGGA 3'

query 3' CUUCUUUGUACGAAUACCUCCU 5'  
query=miR7719-5p, target=R03G\_17249, score=1, range=525-546, stra  
target 5' AAAGAAACAUGCUUAUGGAGGA 3'

query 3' CUUCUUUGUACGAAUACCUCCU 5'  
query=miR7719-5p, target=R03G\_05936, score=2, range=525-546, stra  
target 5' GAAGAAACAUGCUUAUGGAGCA 3'

query 3' CUUCUUUGUACGAAUACCUCCU 5'  
query=miR7719-5p, target=R03G\_05420, score=2, range=386-407, stra





query 3' GUGAUUGGAGGUGGAGUUAU 5'  
query=miR6248, target=R03G\_00107, score=4, range=345-364, strand=  
target 5' CAUUGACCUCUACUCAAUU 3'  
.....  
query 3' GUGAUUGGAGGUGGAGUUAU 5'  
query=miR6248, target=R03G\_07692, score=4, range=876-895, strand=  
target 5' CAGGGAACUCCACCUCAAUG 3'  
:: .: .....

query 3' GUGAUUGGAGGUGGAGUUAU 5'  
query=miR6221-5p, target=R03G\_04120, score=0, range=747-768, stra  
target 5' AGACAGCGGGCCAGAAGACAGA 3'  
.....  
query 3' UCUGUCGCCCCGGUCUUCUGUCU 5'  
query=miR6221-5p, target=R03G\_13224, score=0, range=747-768, stra  
target 5' AGACAGCGGGCCAGAAGACAGA 3'  
.....  
query 3' UCUGUCGCCCCGGUCUUCUGUCU 5'  
query=miR6221-5p, target=R03G\_04123, score=0, range=747-768, stra  
target 5' AGACAGCGGGCCAGAAGACAGA 3'  
.....  
query 3' UCUGUCGCCCCGGUCUUCUGUCU 5'  
query=miR6221-5p, target=R03G\_17093, score=0, range=507-528, stra  
target 5' AGACAGCGGGCCAGAAGACAGA 3'  
.....  
query 3' UCUGUCGCCCCGGUCUUCUGUCU 5'  
query=miR6221-5p, target=R03G\_13221, score=2, range=747-768, stra  
target 5' AGACAGCGGACCAGAAGACAGA 3'  
..... : .....

query 3' UCUGUCGCCCCGGUCUUCUGUCU 5'  
query=miR6221-5p, target=R03G\_01231, score=4, range=889-909, stra  
target 5' UGAGAGCGGGCCA-AAGACAGA 3'  
:: : .....

query 3' UCUGUCGCCCCGGUCUUCUGUCU 5'  
query=miR6221-5p, target=R03G\_01237, score=4, range=544-564, stra  
target 5' UGAGAGCGGGCCA-AAGACAGA 3'  
:: : .....

query 3' UCUGUCGCCCCGGUCUUCUGUCU 5'  
query=miR1849, target=R03G\_15157, score=0, range=555-573, strand=  
target 5' ACCAACCUAUGAUACGCUA 3'  
.....  
query 3' UGGUUGGAUACUAUGCGAU 5'  
query=miR1849, target=R03G\_16810, score=0, range=198-216, strand=  
target 5' ACCAACCUAUGAUACGCUA 3'  
.....  
query 3' UGGUUGGAUACUAUGCGAU 5'



query=miR1849, target=R03G\_04676, score=0, range=555-573, strand=  
target 5' ACCAACCUAUGAUACGCUA 3'  
::::::::::::::::::::  
query 3' UGGUUGGAUACUAUGCGAU 5'  
query=miR1849, target=R03G\_12005, score=0, range=555-573, strand=  
target 5' ACCAACCUAUGAUACGCUA 3'  
::::::::::::::::::::  
query 3' UGGUUGGAUACUAUGCGAU 5'  
query=miR1849, target=R03G\_11407, score=0, range=138-156, strand=  
target 5' ACCAACCUAUGAUACGCUA 3'  
::::::::::::::::::::  
query 3' UGGUUGGAUACUAUGCGAU 5'  
query=miR1849, target=R03G\_12080, score=0, range=138-156, strand=  
target 5' ACCAACCUAUGAUACGCUA 3'  
::::::::::::::::::::  
query 3' UGGUUGGAUACUAUGCGAU 5'  
query=miR1849, target=R03G\_05928, score=0, range=327-345, strand=  
target 5' ACCAACCUAUGAUACGCUA 3'  
::::::::::::::::::::  
query 3' UGGUUGGAUACUAUGCGAU 5'  
query=miR1849, target=R03G\_11953, score=2.5, range=432-450, stran  
target 5' ACCAGCCUAUGAUGCGCUC 3'  
:::::~::~:  
query 3' UGGUUGGAUACUAUGCGAU 5'  
query=miR1849, target=R03G\_07678, score=2.5, range=555-573, stran  
target 5' ACCAGCCUAUGAUGCGCUC 3'  
:::::~::~:  
query 3' UGGUUGGAUACUAUGCGAU 5'  
query=miR1849, target=R03G\_07110, score=2.5, range=555-573, stran  
target 5' ACCAGCCUAUGAUGCGCUC 3'  
:::::~::~:  
query 3' UGGUUGGAUACUAUGCGAU 5'  
query=miR1849, target=R03G\_10525, score=2.5, range=555-573, stran  
target 5' ACCAGCCUAUGAUGCGCUC 3'  
:::::~::~:  
query 3' UGGUUGGAUACUAUGCGAU 5'  
query=miR1849, target=R03G\_07676, score=2.5, range=555-573, stran  
target 5' ACCAGCCUAUGAUGCGCUC 3'  
:::::~::~:  
query 3' UGGUUGGAUACUAUGCGAU 5'  
query=miR1849, target=R03G\_01968, score=2.5, range=555-573, stran  
target 5' ACCAGCCUAUGAUGCGCUC 3'  
:::::~::~:  
query 3' UGGUUGGAUACUAUGCGAU 5'  
query=miR1849, target=R03G\_10531, score=2.5, range=555-573, stran



strand=-1  
target 5' ACUAUCUUAUGAUAUGCUA 3'  
::: :::::::::::::::  
query 3' UGGUUGGAUACUAUGCGAU 5'  
query=miR1849, target=R03G\_14706, score=3.5, range=1799-1817,  
strand=-1  
target 5' ACUAUCUUAUGAUAUGCUA 3'  
::: :::::::::::::::  
query 3' UGGUUGGAUACUAUGCGAU 5'  
query=miR1849, target=R03G\_02953, score=3.5, range=1913-1931,  
strand=-1  
target 5' ACUAUCUUAUGAUAUGCUA 3'  
::: :::::::::::::::  
query 3' UGGUUGGAUACUAUGCGAU 5'  
query=miR1849, target=R03G\_01303, score=3.5, range=2012-2030,  
strand=-1  
target 5' ACUAUCUUAUGAUAUGCUA 3'  
::: :::::::::::::::  
query 3' UGGUUGGAUACUAUGCGAU 5'  
query=miR1849, target=R03G\_05338, score=3.5, range=347-365, stran  
target 5' ACUAUCUUAUGAUAUGCUA 3'  
::: :::::::::::::::  
query 3' UGGUUGGAUACUAUGCGAU 5'  
query=miR1849, target=R03G\_10561, score=3.5, range=347-365, stran  
target 5' ACUAUCUUAUGAUAUGCUA 3'  
::: :::::::::::::::  
query 3' UGGUUGGAUACUAUGCGAU 5'  
query=miR1849, target=R03G\_12463, score=3.5, range=191-209, stran  
target 5' ACUAUCUUAUGAUAUGCUA 3'  
::: :::::::::::::::  
query 3' UGGUUGGAUACUAUGCGAU 5'  
query=miR1849, target=R03G\_17398, score=3.5, range=2012-2030,  
strand=-1  
target 5' ACUAUCUUAUGAUAUGCUA 3'  
::: :::::::::::::::  
query 3' UGGUUGGAUACUAUGCGAU 5'  
query=miR1849, target=R03G\_04802, score=3.5, range=1253-1271,  
strand=-1  
target 5' ACUAUCUUAUGAUAUGCUA 3'  
::: :::::::::::::::  
query 3' UGGUUGGAUACUAUGCGAU 5'  
query=miR1849, target=R03G\_12489, score=3.5, range=46-64, strand=  
target 5' ACAAGCCUAUGAUGCGCUC 3'  
:: :::::::::::::::  
query 3' UGGUUGGAUACUAUGCGAU 5'

query=miR1849, target=R03G\_07870, score=4, range=1473-1492, stran  
target 5' UCCAUCCUAUGAUAUCGCUA 3'  
::: ::::::::::: :::::  
query 3' UGGUUGGAUACUAU-GCGAU 5'  
query=miR1849, target=R03G\_15867, score=4, range=1473-1492, stran  
target 5' UCCAUCCUAUGAUAUCGCUA 3'  
::: ::::::::::: :::::  
query 3' UGGUUGGAUACUAU-GCGAU 5'  
query=miR1849, target=R03G\_05417, score=4, range=825-844, strand=  
target 5' UCCAUCCUAUGAUAUCGCUA 3'  
::: ::::::::::: :::::  
query 3' UGGUUGGAUACUAU-GCGAU 5'  
query=miR1849, target=R03G\_17442, score=4, range=1500-1519, stran  
target 5' UCCAUCCUAUGAUAUCGCUA 3'  
::: ::::::::::: :::::  
query 3' UGGUUGGAUACUAU-GCGAU 5'  
query=miR3627-3p, target=R03G\_12527, score=0, range=1323-1344,  
strand=-1  
target 5' CUUGUCACGAGGACAGCGAGCA 3'  
:::::::::::::::::::::::::::  
query 3' GAACAGUGCUCUGUCGUCUGU 5'  
query=miR3627-3p, target=R03G\_14347, score=0, range=1317-1338,  
strand=-1  
target 5' CUUGUCACGAGGACAGCGAGCA 3'  
:::::::::::::::::::::::::::  
query 3' GAACAGUGCUCUGUCGUCUGU 5'  
query=miR3627-3p, target=R03G\_16361, score=0, range=1317-1338,  
strand=-1  
target 5' CUUGUCACGAGGACAGCGAGCA 3'  
:::::::::::::::::::::::::::  
query 3' GAACAGUGCUCUGUCGUCUGU 5'  
query=miR3627-3p, target=R03G\_09547, score=0, range=1317-1338,  
strand=-1  
target 5' CUUGUCACGAGGACAGCGAGCA 3'  
:::::::::::::::::::::::::::  
query 3' GAACAGUGCUCUGUCGUCUGU 5'  
query=miR3627-3p, target=R03G\_06425, score=0, range=1317-1338,  
strand=-1  
target 5' CUUGUCACGAGGACAGCGAGCA 3'  
:::::::::::::::::::::::::::  
query 3' GAACAGUGCUCUGUCGUCUGU 5'  
query=miR3627-3p, target=R03G\_12677, score=0, range=1317-1338,  
strand=-1  
target 5' CUUGUCACGAGGACAGCGAGCA 3'  
:::::::::::::::::::::::::::

query 3' GAACAGUGCUCCUGUCGUCUGU 5'  
query=miR3627-3p, target=R03G\_17021, score=0, range=1317-1338,  
strand=-1  
target 5' CUUGUCACGAGGACAGCGAGCA 3'  
::::::::::::::::::::::::::

query 3' GAACAGUGCUCCUGUCGUCUGU 5'  
query=miR3627-3p, target=R03G\_02704, score=0, range=1317-1338,  
strand=-1  
target 5' CUUGUCACGAGGACAGCGAGCA 3'  
::::::::::::::::::::::::::

query 3' GAACAGUGCUCCUGUCGUCUGU 5'  
query=miR3627-3p, target=R03G\_05330, score=0, range=1317-1338,  
strand=-1  
target 5' CUUGUCACGAGGACAGCGAGCA 3'  
::::::::::::::::::::::::::

query 3' GAACAGUGCUCCUGUCGUCUGU 5'  
query=miR3627-3p, target=R03G\_04933, score=0, range=1317-1338,  
strand=-1  
target 5' CUUGUCACGAGGACAGCGAGCA 3'  
::::::::::::::::::::::::::

query 3' GAACAGUGCUCCUGUCGUCUGU 5'  
query=miR3627-3p, target=R03G\_04126, score=0, range=1317-1338,  
strand=-1  
target 5' CUUGUCACGAGGACAGCGAGCA 3'  
::::::::::::::::::::::::::

query 3' GAACAGUGCUCCUGUCGUCUGU 5'  
query=miR3627-3p, target=R03G\_05344, score=0, range=1317-1338,  
strand=-1  
target 5' CUUGUCACGAGGACAGCGAGCA 3'  
::::::::::::::::::::::::::

query 3' GAACAGUGCUCCUGUCGUCUGU 5'  
query=miR3627-3p, target=R03G\_03778, score=0, range=1275-1296,  
strand=-1  
target 5' CUUGUCACGAGGACAGCGAGCA 3'  
::::::::::::::::::::::::::

query 3' GAACAGUGCUCCUGUCGUCUGU 5'  
query=miR3627-3p, target=R03G\_17422, score=0, range=618-639, stra  
target 5' CUUGUCACGAGGACAGCGAGCA 3'  
::::::::::::::::::::::::::

query 3' GAACAGUGCUCCUGUCGUCUGU 5'  
query=miR3627-3p, target=R03G\_12532, score=0, range=1323-1344,  
strand=-1  
target 5' CUUGUCACGAGGACAGCGAGCA 3'  
::::::::::::::::::::::::::

query 3' GAACAGUGCUCCUGUCGUCUGU 5'





query 3' UCGUGCUCUUCUUGAUUCUCACU 5'  
query=miR9560b-3p, target=R03G\_17150, score=1, range=2096-2118,  
strand=-1  
target 5' AUCACGAGUAGAACUAAGAGUGA 3'  
: :::::::::::::::::::::  
query 3' UCGUGCUCUUCUUGAUUCUCACU 5'  
query=miR9560b-3p, target=R03G\_06111, score=4, range=34-56, stran  
target 5' AGCAAGCACAGAACUAAGAGUGA 3'  
:::: : :::::::::::::::::::::  
query 3' UCGUGCUCUUCUUGAUUCUCACU 5'  
query=miR160b-3p, target=R03G\_02296, score=4, range=1445-1464,  
strand=-1  
target 5' ACGCAUGACUACUCUGUGUG 3'  
: :: :::::::::::::::::::::  
query 3' UACGAACUGAUGAGACAUGC 5'  
query=miR5176-5p, target=R03G\_10860, score=0, range=576-595, stra  
target 5' GAGAUGUGACACAUGGAAUA 3'  
:::::::::::::::::::  
query 3' CUCUACACUGUGUACCUUUAU 5'  
query=miR5176-5p, target=R03G\_17289, score=0, range=576-595, stra  
target 5' GAGAUGUGACACAUGGAAUA 3'  
:::::::::::::::::::  
query 3' CUCUACACUGUGUACCUUUAU 5'  
query=miR5176-5p, target=R03G\_07729, score=0, range=345-364, stra  
target 5' GAGAUGUGACACAUGGAAUA 3'  
:::::::::::::::::::  
query 3' CUCUACACUGUGUACCUUUAU 5'  
query=miR5176-5p, target=R03G\_08111, score=0, range=576-595, stra  
target 5' GAGAUGUGACACAUGGAAUA 3'  
:::::::::::::::::::  
query 3' CUCUACACUGUGUACCUUUAU 5'  
query=miR5176-5p, target=R03G\_02682, score=0, range=576-595, stra  
target 5' GAGAUGUGACACAUGGAAUA 3'  
:::::::::::::::::::  
query 3' CUCUACACUGUGUACCUUUAU 5'  
query=miR5176-5p, target=R03G\_12182, score=0, range=576-595, stra  
target 5' GAGAUGUGACACAUGGAAUA 3'  
:::::::::::::::::::  
query 3' CUCUACACUGUGUACCUUUAU 5'  
query=miR5176-5p, target=R03G\_11784, score=0.5, range=576-595,  
strand=1  
target 5' GAGAUGUGACACAUGGAAUG 3'  
:::::::::::::::::::  
query 3' CUCUACACUGUGUACCUUUAU 5'  
query=miR5176-5p, target=R03G\_12541, score=0.5, range=576-595,





strand=-1  
target 5' GAGA-GGGAUGCAUGGAAUA 3'  
:::: : ::.....  
query 3' CUCUACACUGUGUACCUUUAU 5'  
query=miR5176-5p, target=R03G\_16929, score=4, range=1519-1539,  
strand=-1  
target 5' GAGCUUUUGACACAUGGAAUC 3'  
::: : ::.....  
query 3' CUC-UACACUGUGUACCUUUAU 5'  
query=miR8602, target=R03G\_17276, score=0, range=874-893, strand=  
target 5' UGGCCAGCAUACUCUCCUGA 3'  
:::::::::::  
query 3' ACCGUCGUAUGAGAGGACU 5'  
query=miR8602, target=R03G\_17259, score=0, range=190-209, strand=  
target 5' UGGCCAGCAUACUCUCCUGA 3'  
:::::::::::  
query 3' ACCGUCGUAUGAGAGGACU 5'  
query=miR8602, target=R03G\_10869, score=0, range=190-209, strand=  
target 5' UGGCCAGCAUACUCUCCUGA 3'  
:::::::::::  
query 3' ACCGUCGUAUGAGAGGACU 5'  
query=miR8602, target=R03G\_14363, score=0, range=742-761, strand=  
target 5' UGGCCAGCAUACUCUCCUGA 3'  
:::::::::::  
query 3' ACCGUCGUAUGAGAGGACU 5'  
query=miR8602, target=R03G\_17249, score=0, range=709-728, strand=  
target 5' UGGCCAGCAUACUCUCCUGA 3'  
:::::::::::  
query 3' ACCGUCGUAUGAGAGGACU 5'  
query=miR8602, target=R03G\_13270, score=0, range=784-803, strand=  
target 5' UGGCCAGCAUACUCUCCUGA 3'  
:::::::::::  
query 3' ACCGUCGUAUGAGAGGACU 5'  
query=miR8602, target=R03G\_10774, score=0, range=751-770, strand=  
target 5' UGGCCAGCAUACUCUCCUGA 3'  
:::::::::::  
query 3' ACCGUCGUAUGAGAGGACU 5'  
query=miR8602, target=R03G\_04790, score=0, range=190-209, strand=  
target 5' UGGCCAGCAUACUCUCCUGA 3'  
:::::::::::  
query 3' ACCGUCGUAUGAGAGGACU 5'  
query=miR8602, target=R03G\_05935, score=0, range=190-209, strand=  
target 5' UGGCCAGCAUACUCUCCUGA 3'  
:::::::::::  
query 3' ACCGUCGUAUGAGAGGACU 5'

query=miR8602, target=R03G\_03593, score=0, range=190-209, strand=  
target 5' UGGCCAGCAUACUCUCCUGA 3'  
:~::~  
query 3' ACCGGUCGUAUGAGAGGACU 5'  
query=miR8602, target=R03G\_01589, score=0, range=190-209, strand=  
target 5' UGGCCAGCAUACUCUCCUGA 3'  
:~::~  
query 3' ACCGGUCGUAUGAGAGGACU 5'  
query=miR8602, target=R03G\_03626, score=0, range=190-209, strand=  
target 5' UGGCCAGCAUACUCUCCUGA 3'  
:~::~  
query 3' ACCGGUCGUAUGAGAGGACU 5'  
query=miR8602, target=R03G\_13863, score=0, range=484-503, strand=  
target 5' UGGCCAGCAUACUCUCCUGA 3'  
:~::~  
query 3' ACCGGUCGUAUGAGAGGACU 5'  
query=miR8602, target=R03G\_11527, score=0, range=190-209, strand=  
target 5' UGGCCAGCAUACUCUCCUGA 3'  
:~::~  
query 3' ACCGGUCGUAUGAGAGGACU 5'  
query=miR8602, target=R03G\_00678, score=0, range=154-173, strand=  
target 5' UGGCCAGCAUACUCUCCUGA 3'  
:~::~  
query 3' ACCGGUCGUAUGAGAGGACU 5'  
query=miR8602, target=R03G\_14547, score=0.5, range=190-209, stran  
target 5' UGGCUAGCAUACUCUCCUGA 3'  
:~::~  
query 3' ACCGGUCGUAUGAGAGGACU 5'  
query=miR8602, target=R03G\_13921, score=1, range=190-209, strand=  
target 5' UGGCCAGCAUACUCUCUUGA 3'  
:~::~  
query 3' ACCGGUCGUAUGAGAGGACU 5'  
query=miR8602, target=R03G\_17459, score=1, range=190-209, strand=  
target 5' UGGUCAGCAUACUCUCCUGG 3'  
:~::~  
query 3' ACCGGUCGUAUGAGAGGACU 5'  
query=miR8602, target=R03G\_10734, score=1, range=190-209, strand=  
target 5' UGGUCAGCAUACUCUCCUGG 3'  
:~::~  
query 3' ACCGGUCGUAUGAGAGGACU 5'  
query=miR8602, target=R03G\_15166, score=3, range=790-809, strand=  
target 5' UGGCCAGCAUAUUCACCUGA 3'  
:~::~  
query 3' ACCGGUCGUAUGAGAGGACU 5'  
query=miR8602, target=R03G\_07577, score=3, range=142-161, strand=



query 3' AGGAAGUUUAGAGUUGCGCGUU 5'  
query=miR1043-3p, target=R03G\_17190, score=2, range=198-219, strand=+  
target 5' UCCUCAAACCUCAACGCGCAA 3'

query 3' AGGAAGUUUAGAGUUGCGCGUU 5'  
query=miR1043-3p, target=R03G\_14599, score=2, range=6-27, strand=+  
target 5' UCCUCAAACCUCAACGCGCAA 3'

query 3' AGGAAGUUUAGAGUUGCGCGUU 5'  
query=miR1043-3p, target=R03G\_10358, score=2, range=6-27, strand=+  
target 5' UCCUCAAACCUCAACGCGCAA 3'

query 3' AGGAAGUUUAGAGUUGCGCGUU 5'  
query=miR1043-3p, target=R03G\_10071, score=2, range=6-27, strand=+  
target 5' UCCUCAAACCUCAACGCGCAA 3'

query 3' AGGAAGUUUAGAGUUGCGCGUU 5'  
query=miR1043-3p, target=R03G\_11282, score=2, range=198-219, strand=+  
target 5' UCCUCAAACCUCAACGCGCAA 3'

query 3' AGGAAGUUUAGAGUUGCGCGUU 5'  
query=miR7814, target=R03G\_06442, score=0, range=3852-3873, strand=-  
target 5' UCAAAGCAUCAAAAGACAUAUUA 3'

query 3' AGUUUCGUAGUUUCUGUAUAAU 5'  
query=miR7814, target=R03G\_09965, score=0, range=3195-3216, strand=-  
target 5' UCAAAGCAUCAAAAGACAUAUUA 3'

query 3' AGUUUCGUAGUUUCUGUAUAAU 5'  
query=miR7814, target=R03G\_13867, score=0, range=3111-3132, strand=-  
target 5' UCAAAGCAUCAAAAGACAUAUUA 3'

query 3' AGUUUCGUAGUUUCUGUAUAAU 5'  
query=miR7814, target=R03G\_02959, score=0, range=3195-3216, strand=-  
target 5' UCAAAGCAUCAAAAGACAUAUUA 3'

query 3' AGUUUCGUAGUUUCUGUAUAAU 5'  
query=miR7814, target=R03G\_15250, score=0, range=3150-3171, strand=-  
target 5' UCAAAGCAUCAAAAGACAUAUUA 3'

query 3' AGUUUCGUAGUUUCUGUAUAAU 5'  
query=miR7814, target=R03G\_17371, score=0, range=3150-3171, strand=-  
target 5' UCAAAGCAUCAAAAGACAUAUUA 3'

query 3' AGUUUCGUAGUUUCUGUAUAAU 5'  
query=miR7814, target=R03G\_06427, score=0, range=2787-2808, stran  
target 5' UCAAAGCAUCAAAAGACAUAUUA 3'  
.....  
query 3' AGUUUCGUAGUUUCUGUAUAAU 5'  
query=miR7814, target=R03G\_17326, score=0, range=3027-3048, stran  
target 5' UCAAAGCAUCAAAAGACAUAUUA 3'  
.....  
query 3' AGUUUCGUAGUUUCUGUAUAAU 5'  
query=miR7814, target=R03G\_06428, score=0, range=2289-2310, stran  
target 5' UCAAAGCAUCAAAAGACAUAUUA 3'  
.....  
query 3' AGUUUCGUAGUUUCUGUAUAAU 5'  
query=miR7814, target=R03G\_13749, score=0, range=1758-1779, stran  
target 5' UCAAAGCAUCAAAAGACAUAUUA 3'  
.....  
query 3' AGUUUCGUAGUUUCUGUAUAAU 5'  
query=miR7814, target=R03G\_05619, score=0, range=1338-1359, stran  
target 5' UCAAAGCAUCAAAAGACAUAUUA 3'  
.....  
query 3' AGUUUCGUAGUUUCUGUAUAAU 5'  
query=miR7814, target=R03G\_14355, score=0, range=1401-1422, stran  
target 5' UCAAAGCAUCAAAAGACAUAUUA 3'  
.....  
query 3' AGUUUCGUAGUUUCUGUAUAAU 5'  
query=miR7814, target=R03G\_15585, score=0, range=2997-3018, stran  
target 5' UCAAAGCAUCAAAAGACAUAUUA 3'  
.....  
query 3' AGUUUCGUAGUUUCUGUAUAAU 5'  
query=miR7814, target=R03G\_11776, score=0, range=285-306, strand=  
target 5' UCAAAGCAUCAAAAGACAUAUUA 3'  
.....  
query 3' AGUUUCGUAGUUUCUGUAUAAU 5'  
query=miR7814, target=R03G\_02222, score=0, range=249-270, strand=  
target 5' UCAAAGCAUCAAAAGACAUAUUA 3'  
.....  
query 3' AGUUUCGUAGUUUCUGUAUAAU 5'  
query=miR7814, target=R03G\_10558, score=0, range=948-969, strand=  
target 5' UCAAAGCAUCAAAAGACAUAUUA 3'  
.....  
query 3' AGUUUCGUAGUUUCUGUAUAAU 5'  
query=miR7814, target=R03G\_04115, score=0, range=138-159, strand=  
target 5' UCAAAGCAUCAAAAGACAUAUUA 3'  
.....  
query 3' AGUUUCGUAGUUUCUGUAUAAU 5'

query=miR7814, target=R03G\_05279, score=0, range=141-162, strand=  
target 5' UCAAAGCAUCAAAAGACAUAUUA 3'  
:~::~:  
query 3' AGUUUCGUAGUUUCUGUAUAAU 5'  
query=miR7814, target=R03G\_02691, score=1, range=6684-6705, stran  
target 5' UCAAAGCAUCAAAAGAUUAUUA 3'  
:~::~:  
query 3' AGUUUCGUAGUUUCUGUAUAAU 5'  
query=miR7814, target=R03G\_03547, score=1, range=3195-3216, stran  
target 5' UCAAAGCAUCAAAAGAUUAUUA 3'  
:~::~:  
query 3' AGUUUCGUAGUUUCUGUAUAAU 5'  
query=miR7814, target=R03G\_13920, score=1, range=3195-3216, stran  
target 5' UCAAAGCAUCAAAAGAUUAUUA 3'  
:~::~:  
query 3' AGUUUCGUAGUUUCUGUAUAAU 5'  
query=miR7814, target=R03G\_01613, score=1, range=1446-1467, stran  
target 5' UCAAAGCAUCAAAAGGCAUAUUA 3'  
:~::~:  
query 3' AGUUUCGUAGUUUCUGUAUAAU 5'  
query=miR7814, target=R03G\_00306, score=2, range=1491-1512, stran  
target 5' UCAAAGCAUCAAAAGACAUAUCA 3'  
:~::~:  
query 3' AGUUUCGUAGUUUCUGUAUAAU 5'  
query=miR7814, target=R03G\_01330, score=2, range=429-450, strand=  
target 5' UCAAAGCAUCAAAAGACAUAUCA 3'  
:~::~:  
query 3' AGUUUCGUAGUUUCUGUAUAAU 5'  
query=miR6116-3p, target=R03G\_12001, score=0, range=785-806, stra  
target 5' CUA AUGCUUGGAUGACAAAUGA 3'  
:~::~:  
query 3' GAUUACGAACCUACUGUUUACU 5'  
query=miR6116-3p, target=R03G\_10556, score=0, range=785-806, stra  
target 5' CUA AUGCUUGGAUGACAAAUGA 3'  
:~::~:  
query 3' GAUUACGAACCUACUGUUUACU 5'  
query=miR6116-3p, target=R03G\_17369, score=0, range=785-806, stra  
target 5' CUA AUGCUUGGAUGACAAAUGA 3'  
:~::~:  
query 3' GAUUACGAACCUACUGUUUACU 5'  
query=miR6116-3p, target=R03G\_15681, score=0, range=44-65, strand  
target 5' CUA AUGCUUGGAUGACAAAUGA 3'  
:~::~:  
query 3' GAUUACGAACCUACUGUUUACU 5'  
query=miR6116-3p, target=R03G\_13488, score=0, range=44-65, strand





: ::::::::::: :::  
query 3' UUGAGAAACCGUAACACCU 5'  
query=miR6473, target=R03G\_05229, score=3.5, range=423-440, stran  
target 5' AUCUC-UUGGUAUUGUGGG 3'  
: ::: :::::::::::  
query 3' UUGAGAAACCGUAACACCU 5'  
query=miR6473, target=R03G\_01384, score=3.5, range=179-196, stran  
target 5' AACUC-UUGGAAUUGUGGG 3'  
::::: :::: :::::::::::  
query 3' UUGAGAAACCGUAACACCU 5'  
query=miR6473, target=R03G\_04420, score=3.5, range=74-92, strand=  
target 5' CAUUCUUUGGCAUUGAGGA 3'  
::::::::::::: :::  
query 3' UUGAGAAACCGUAACACCU 5'  
query=miR6473, target=R03G\_01452, score=3.5, range=477-495, stran  
target 5' AGCACAUUGGUAUUGUGGA 3'  
::: : :::::::::::::::  
query 3' UUGAGAAACCGUAACACCU 5'  
query=miR6473, target=R03G\_16362, score=3.5, range=2592-2610,  
strand=-1  
target 5' AGCCAAUUGGCAUUGUGGA 3'  
::: :::::::::::::::  
query 3' UUGAGAAACCGUAACACCU 5'  
query=miR6473, target=R03G\_11493, score=4, range=682-699, strand=  
target 5' CAUUUUUUGGC-UUGUGGA 3'  
:..: :::::::::::  
query 3' UUGAGAAACCGUAACACCU 5'  
query=miR6473, target=R03G\_01660, score=4, range=986-1004, strand  
target 5' GACUGUUUGGCAUUGUUGG 3'  
.::: ::::::::::: :.  
query 3' UUGAGAAACCGUAACACCU 5'  
query=miR6473, target=R03G\_02589, score=4, range=951-969, strand=  
target 5' AAGUCGUUGGUAUUGUGGU 3'  
:: : : :::::::::::::::  
query 3' UUGAGAAACCGUAACACCU 5'  
query=miR6473, target=R03G\_16173, score=4, range=222-239, strand=  
target 5' AAGUUUUUGGCAUU-UGGG 3'  
:: : ::::::::::: :::  
query 3' UUGAGAAACCGUAACACCU 5'  
query=miR6473, target=R03G\_10811, score=4, range=137-154, strand=  
target 5' AAC-AUUUGGCAUUGUGAA 3'  
::: ::::::::::: :  
query 3' UUGAGAAACCGUAACACCU 5'  
query=miR3712, target=R03G\_16744, score=0, range=558-578, strand=  
target 5' UGGUCUUGAUCUUGAUCAGCA 3'

query 3' ACCAGAACUAGAACUAGUCGU 5'  
query=miR3712, target=R03G\_01203, score=0, range=558-578, strand=  
target 5' UGGUCUUGAUCUUGAUCAGCA 3'

query 3' ACCAGAACUAGAACUAGUCGU 5'  
query=miR3712, target=R03G\_11403, score=0, range=558-578, strand=  
target 5' UGGUCUUGAUCUUGAUCAGCA 3'

query 3' ACCAGAACUAGAACUAGUCGU 5'  
query=miR3712, target=R03G\_06416, score=0, range=558-578, strand=  
target 5' UGGUCUUGAUCUUGAUCAGCA 3'

query 3' ACCAGAACUAGAACUAGUCGU 5'  
query=miR3712, target=R03G\_01718, score=0, range=558-578, strand=  
target 5' UGGUCUUGAUCUUGAUCAGCA 3'

query 3' ACCAGAACUAGAACUAGUCGU 5'  
query=miR3712, target=R03G\_15869, score=0, range=558-578, strand=  
target 5' UGGUCUUGAUCUUGAUCAGCA 3'

query 3' ACCAGAACUAGAACUAGUCGU 5'  
query=miR3712, target=R03G\_10560, score=0, range=558-578, strand=  
target 5' UGGUCUUGAUCUUGAUCAGCA 3'

query 3' ACCAGAACUAGAACUAGUCGU 5'  
query=miR3712, target=R03G\_11275, score=0, range=558-578, strand=  
target 5' UGGUCUUGAUCUUGAUCAGCA 3'

query 3' ACCAGAACUAGAACUAGUCGU 5'  
query=miR3712, target=R03G\_14704, score=0, range=558-578, strand=  
target 5' UGGUCUUGAUCUUGAUCAGCA 3'

query 3' ACCAGAACUAGAACUAGUCGU 5'  
query=miR3712, target=R03G\_12979, score=0, range=558-578, strand=  
target 5' UGGUCUUGAUCUUGAUCAGCA 3'

query 3' ACCAGAACUAGAACUAGUCGU 5'  
query=miR3712, target=R03G\_10555, score=0, range=558-578, strand=  
target 5' UGGUCUUGAUCUUGAUCAGCA 3'

query 3' ACCAGAACUAGAACUAGUCGU 5'  
query=miR3712, target=R03G\_05280, score=0, range=558-578, strand=  
target 5' UGGUCUUGAUCUUGAUCAGCA 3'

query 3' ACCAGAACUAGAACUAGUCGU 5'  
query=miR3712, target=R03G\_16686, score=0, range=558-578, strand=  
target 5' UGGUCUUGAUCUUGAUCAGCA 3'  
.....  
query 3' ACCAGAACUAGAACUAGUCGU 5'  
query=miR3712, target=R03G\_07305, score=0, range=558-578, strand=  
target 5' UGGUCUUGAUCUUGAUCAGCA 3'  
.....  
query 3' ACCAGAACUAGAACUAGUCGU 5'  
query=miR3712, target=R03G\_12087, score=0, range=558-578, strand=  
target 5' UGGUCUUGAUCUUGAUCAGCA 3'  
.....  
query 3' ACCAGAACUAGAACUAGUCGU 5'  
query=miR3712, target=R03G\_08612, score=0, range=558-578, strand=  
target 5' UGGUCUUGAUCUUGAUCAGCA 3'  
.....  
query 3' ACCAGAACUAGAACUAGUCGU 5'  
query=miR3712, target=R03G\_05630, score=0, range=558-578, strand=  
target 5' UGGUCUUGAUCUUGAUCAGCA 3'  
.....  
query 3' ACCAGAACUAGAACUAGUCGU 5'  
query=miR3712, target=R03G\_13450, score=0, range=513-533, strand=  
target 5' UGGUCUUGAUCUUGAUCAGCA 3'  
.....  
query 3' ACCAGAACUAGAACUAGUCGU 5'  
query=miR3712, target=R03G\_13859, score=0, range=183-203, strand=  
target 5' UGGUCUUGAUCUUGAUCAGCA 3'  
.....  
query 3' ACCAGAACUAGAACUAGUCGU 5'  
query=miR3712, target=R03G\_11970, score=0, range=558-578, strand=  
target 5' UGGUCUUGAUCUUGAUCAGCA 3'  
.....  
query 3' ACCAGAACUAGAACUAGUCGU 5'  
query=miR3712, target=R03G\_13152, score=0, range=558-578, strand=  
target 5' UGGUCUUGAUCUUGAUCAGCA 3'  
.....  
query 3' ACCAGAACUAGAACUAGUCGU 5'  
query=miR3712, target=R03G\_03988, score=0, range=558-578, strand=  
target 5' UGGUCUUGAUCUUGAUCAGCA 3'  
.....  
query 3' ACCAGAACUAGAACUAGUCGU 5'  
query=miR3712, target=R03G\_09376, score=0, range=558-578, strand=  
target 5' UGGUCUUGAUCUUGAUCAGCA 3'  
.....  
query 3' ACCAGAACUAGAACUAGUCGU 5'





query 3' UGCUUAAGGUACGACGAGAAGUU 5'  
query=miR163, target=R03G\_10737, score=1, range=851-873, strand=1  
target 5' ACGAAUCCAUGCUGUUCUCAA 3'

query 3' UGCUUAAGGUACGACGAGAAGUU 5'  
query=miR163, target=R03G\_00259, score=1, range=851-873, strand=1  
target 5' ACGAAUCCAUGCUGUUCUCAA 3'

query 3' UGCUUAAGGUACGACGAGAAGUU 5'  
query=miR163, target=R03G\_10048, score=1, range=851-873, strand=1  
target 5' ACGAAUCCAUGCUGUUCUCAA 3'

query 3' UGCUUAAGGUACGACGAGAAGUU 5'  
query=miR163, target=R03G\_02231, score=1, range=851-873, strand=1  
target 5' ACGAAUCCAUGCUGUUCUCAA 3'

query 3' UGCUUAAGGUACGACGAGAAGUU 5'  
query=miR163, target=R03G\_16127, score=1, range=851-873, strand=1  
target 5' ACGAAUCCAUGCUGUUCUCAA 3'

query 3' UGCUUAAGGUACGACGAGAAGUU 5'  
query=miR163, target=R03G\_02827, score=1, range=851-873, strand=1  
target 5' ACGAAUCCAUGCUGUUCUCAA 3'

query 3' UGCUUAAGGUACGACGAGAAGUU 5'  
query=miR163, target=R03G\_13711, score=1, range=836-858, strand=1  
target 5' ACGAAUCCAUGCUGUUCUCAA 3'

query 3' UGCUUAAGGUACGACGAGAAGUU 5'  
query=miR163, target=R03G\_05910, score=1, range=851-873, strand=1  
target 5' ACGAAUCCAUGCUGUUCUCAA 3'

query 3' UGCUUAAGGUACGACGAGAAGUU 5'  
query=miR163, target=R03G\_07115, score=1, range=812-834, strand=1  
target 5' ACGAAUCCAUGCUGUUCUCAA 3'

query 3' UGCUUAAGGUACGACGAGAAGUU 5'  
query=miR163, target=R03G\_01198, score=1, range=785-807, strand=1  
target 5' ACGAAUCCAUGCUGUUCUCAA 3'

query 3' UGCUUAAGGUACGACGAGAAGUU 5'  
query=miR163, target=R03G\_09184, score=1, range=563-585, strand=1  
target 5' ACGAAUCCAUGCUGUUCUCAA 3'

query 3' UGCUUAAGGUACGACGAGAAGUU 5'  
query=miR163, target=R03G\_01723, score=1, range=272-294, strand=1  
target 5' ACGAAUCCAUGCUGUUCUCAA 3'  
.....  
query 3' UGCUUAAGGUACGACGAGAAGUU 5'  
query=miR163, target=R03G\_17241, score=1, range=170-192, strand=1  
target 5' ACGAAUCCAUGCUGUUCUCAA 3'  
.....  
query 3' UGCUUAAGGUACGACGAGAAGUU 5'  
query=miR163, target=R03G\_12195, score=1, range=44-66, strand=1  
target 5' ACGAAUCCAUGCUGUUCUCAA 3'  
.....  
query 3' UGCUUAAGGUACGACGAGAAGUU 5'  
query=miR163, target=R03G\_07933, score=3.5, range=1332-1353, str  
target 5' AC-AGAUGCAUGCUGCUCUCAA 3'  
:: : : .....  
query 3' UGCUUAAGGUACGACGAGAAGUU 5'  
query=miR163, target=R03G\_12867, score=3.5, range=68-89, strand=-  
target 5' AC-AAUUUCUUGCUGCUUUCAA 3'  
:: : : .....  
query 3' UGCUUAAGGUACGACGAGAAGUU 5'  
query=miR163, target=R03G\_16486, score=4, range=2408-2430, strand  
target 5' ACGGACUCCAGGCUGCUCUUCAG 3'  
: : : : .....  
query 3' UGCUUAAGGUACGACGAGAAGUU 5'  
query=miR163, target=R03G\_16013, score=4, range=17-39, strand=-1  
target 5' ACGGAUCCGUCCUGUUCUCAA 3'  
: : : : .....  
query 3' UGCUUAAGGUACGACGAGAAGUU 5'  
query=miR5648-5p, target=R03G\_14543, score=3, range=1452-1472,  
strand=1  
target 5' AGUCAAUCCUAAAUUUUAAA 3'  
: : : : .....  
query 3' UCAGUCCGGUUUAAAAUUU 5'  
query=miR5648-5p, target=R03G\_11833, score=4, range=2232-2252,  
strand=-1  
target 5' AUCCAAGCCCAAUUUUUGAA 3'  
: : : : .....  
query 3' UCAGUCCGGUUUAAAAUUU 5'  
query=miR5648-5p, target=R03G\_02881, score=4, range=1084-1105,  
strand=-1  
target 5' AACCAACUGCCAAAUUUUAAA 3'  
: : : : .....  
query 3' UCAGUU-CCGGUUUAAAAUUU 5'  
query=miR444b, target=R03G\_11967, score=0, range=834-854, strand=





```
.. :: ::::::::::::::
query 3' UUGAACCUUUGUCGUUGCCGU 5'
query=miR2873b, target=R03G_14347, score=0, range=2183-2202, stra
target 5' AAUAACCAAUCCAAUCCAA 3'
::::::::::::::::::
query 3' UUAUUGGUUUAGGUUAGGUU 5'
query=miR2873b, target=R03G_05301, score=1.5, range=436-455, stra
target 5' ACUGACCAAUCCAAUCCAA 3'
: ::::::::::::::::::::
query 3' UUAUUGGUUUAGGUUAGGUU 5'
query=miR2873b, target=R03G_17068, score=2, range=113-132, strand
target 5' AAUAACCAAACCCAAUCCAA 3'
:::::::::::: ::::::::::
query 3' UUAUUGGUUUAGGUUAGGUU 5'
query=miR2873b, target=R03G_07209, score=2.5, range=19-38, strand
target 5' AAGAGCGAAAUCCAAUCCAA 3'
:: :: ::::::::::::::
query 3' UUAUUGGUUUAGGUUAGGUU 5'
query=miR2873b, target=R03G_04523, score=2.5, range=617-636, stra
target 5' AUUGACGAAAUCCAAUCCAA 3'
: :::: ::::::::::::::
query 3' UUAUUGGUUUAGGUUAGGUU 5'
query=miR2873b, target=R03G_03060, score=3, range=128-147, strand
target 5' AAUAAUUAUUCCAAUUUAA 3'
::::::::::::::::::
query 3' UUAUUGGUUUAGGUUAGGUU 5'
query=miR2873b, target=R03G_09293, score=3, range=342-361, strand
target 5' AAUAACCAAUUCGAUCCAU 3'
::::::::::::::::::
query 3' UUAUUGGUUUAGGUUAGGUU 5'
query=miR2873b, target=R03G_02140, score=3, range=218-237, strand
target 5' AAUAACAAAACCCAAUCCAA 3'
::::: ::: ::::::::::
query 3' UUAUUGGUUUAGGUUAGGUU 5'
query=miR2873b, target=R03G_02129, score=3.5, range=163-182, stra
target 5' UAUGGUCAAUCCAAUCCAU 3'
.....::::::::::::
query 3' UUAUUGGUUUAGGUUAGGUU 5'
query=miR2873b, target=R03G_03362, score=3.5, range=1125-1144,
strand=1
target 5' AAUGAGCAAUUCAAUCCAC 3'
::::: ::::::::::::::
query 3' UUAUUGGUUUAGGUUAGGUU 5'
query=miR2873b, target=R03G_07290, score=3.5, range=1570-1590,
strand=1
```





query 3' UUAUUGUUUAGGUUAGGUU 5'  
query=miR2873b, target=R03G\_08837, score=4, range=43-61, strand=-  
target 5' CAUAGCCAAAUCCAA-CCAG 3'  
.....  
query 3' UUAUUGUUUAGGUUAGGUU 5'  
query=miR2873b, target=R03G\_06993, score=4, range=605-624, strand  
target 5' AAUCACAAAUUCAAUCCAU 3'  
... :: .....  
query 3' UUAUUGUUUAGGUUAGGUU 5'  
query=miR2873b, target=R03G\_00559, score=4, range=192-210, strand  
target 5' AAUGA-UAAAUCCAAUCGAA 3'  
..... : .....  
query 3' UUAUUGUUUAGGUUAGGUU 5'  
query=miR2873b, target=R03G\_05783, score=4, range=773-791, strand  
target 5' AGUAAUGAAA-CCAAUCCAA 3'  
..... : .....  
query 3' UUAUUGUUUAGGUUAGGUU 5'  
query=miR833a-5p, target=R03G\_14793, score=0, range=1679-1702,  
strand=-1  
target 5' ACAGACCGGGUACAAACAAAGCCA 3'  
.....  
query 3' UGUCUGGCCCAUGUUUGUUUCGGU 5'  
query=miR833a-5p, target=R03G\_14787, score=0, range=1679-1702,  
strand=-1  
target 5' ACAGACCGGGUACAAACAAAGCCA 3'  
.....  
query 3' UGUCUGGCCCAUGUUUGUUUCGGU 5'  
query=miR833a-5p, target=R03G\_15875, score=0, range=1679-1702,  
strand=-1  
target 5' ACAGACCGGGUACAAACAAAGCCA 3'  
.....  
query 3' UGUCUGGCCCAUGUUUGUUUCGGU 5'  
query=miR833a-5p, target=R03G\_14800, score=0, range=1679-1702,  
strand=-1  
target 5' ACAGACCGGGUACAAACAAAGCCA 3'  
.....  
query 3' UGUCUGGCCCAUGUUUGUUUCGGU 5'  
query=miR833a-5p, target=R03G\_17411, score=0, range=1121-1144,  
strand=-1  
target 5' ACAGACCGGGUACAAACAAAGCCA 3'  
.....  
query 3' UGUCUGGCCCAUGUUUGUUUCGGU 5'  
query=miR833a-5p, target=R03G\_17268, score=0, range=260-283, stra  
target 5' ACAGACCGGGUACAAACAAAGCCA 3'  
.....





query 3' UACUGUCUCCGAUCUCUCG 5'  
query=miR858a, target=R03G\_05597, score=3, range=4075-4094, stran  
target 5' AAGCUAGAACAGACAACGGA 3'  
::: : :::::::::::::::  
query 3' UUCCAGCUUGUCUGUUGCUU 5'  
query=miR858a, target=R03G\_06011, score=3.5, range=77-97, strand=  
target 5' AAGGCUUGAGUAGACAACGAA 3'  
:::: :.....:::::  
query 3' UUCC-AGCUUGUCUGUUGCUU 5'  
query=miR858a, target=R03G\_01852, score=3.5, range=760-779, stran  
target 5' AAGAUGGAACAGACAGCGAG 3'  
::: : :::::::::::::::  
query 3' UUCCAGCUUGUCUGUUGCUU 5'  
query=miR858a, target=R03G\_07089, score=4, range=415-434, strand=  
target 5' AAGAUCAAACAGACGACGGA 3'  
::: :: :::::::::::::::  
query 3' UUCCAGCUUGUCUGUUGCUU 5'  
query=miR858a, target=R03G\_09755, score=4, range=2015-2033, stran  
target 5' AAGCUC-AACAAACAACGAA 3'  
::: :: ::: : :::::::::::::::  
query 3' UUCCAGCUUGUCUGUUGCUU 5'  
query=miR858a, target=R03G\_00260, score=4, range=415-434, strand=  
target 5' AAGUUCGAACGGACAAAGAA 3'  
::: : ::::::::::::::: : :::  
query 3' UUCCAGCUUGUCUGUUGCUU 5'  
query=miR858a, target=R03G\_14476, score=4, range=927-947, strand=  
target 5' AAGCCUCGAACAGACAAUGGA 3'  
::: : ::::::::::::::: : :::  
query 3' UUC-CAGCUUGUCUGUUGCUU 5'  
query=miR6269, target=R03G\_13221, score=0, range=860-881, strand=  
target 5' CCAUGGCUAAUCACUUGCAGCA 3'  
: ::::::::::::::: : :::  
query 3' GGUACCGAUUAGUGAACGUCGU 5'  
query=miR6269, target=R03G\_04123, score=2, range=860-881, strand=  
target 5' CCAUGGCUAACCACUUGCAGCA 3'  
: ::::::::::::::: : :::::::::::::::  
query 3' GGUACCGAUUAGUGAACGUCGU 5'  
query=miR6269, target=R03G\_13224, score=4, range=860-881, strand=  
target 5' CCAUGGCUAACCACUUGCAACA 3'  
: ::::::::::::::: : ::: : :::  
query 3' GGUACCGAUUAGUGAACGUCGU 5'  
query=miR6269, target=R03G\_04120, score=4, range=860-881, strand=  
target 5' CCAUGGCUAACCACUUGCAACA 3'  
: ::::::::::::::: : ::: : :::  
query 3' GGUACCGAUUAGUGAACGUCGU 5'







query 3' UGCUUGUUUCUUGAAGAAGUU 5'  
query=miR6156, target=R03G\_01323, score=0, range=394-414, strand=  
target 5' ACGAACAAAGAACUUCUUCAA 3'

query 3' UGCUUGUUUCUUGAAGAAGUU 5'  
query=miR6156, target=R03G\_17212, score=0, range=394-414, strand=  
target 5' ACGAACAAAGAACUUCUUCAA 3'

query 3' UGCUUGUUUCUUGAAGAAGUU 5'  
query=miR6156, target=R03G\_16740, score=0, range=394-414, strand=  
target 5' ACGAACAAAGAACUUCUUCAA 3'

query 3' UGCUUGUUUCUUGAAGAAGUU 5'  
query=miR6156, target=R03G\_10049, score=0, range=394-414, strand=  
target 5' ACGAACAAAGAACUUCUUCAA 3'

query 3' UGCUUGUUUCUUGAAGAAGUU 5'  
query=miR6156, target=R03G\_12012, score=0, range=559-579, strand=  
target 5' ACGAACAAAGAACUUCUUCAA 3'

query 3' UGCUUGUUUCUUGAAGAAGUU 5'  
query=miR6156, target=R03G\_09492, score=0, range=559-579, strand=  
target 5' ACGAACAAAGAACUUCUUCAA 3'

query 3' UGCUUGUUUCUUGAAGAAGUU 5'  
query=miR6156, target=R03G\_16559, score=0, range=394-414, strand=  
target 5' ACGAACAAAGAACUUCUUCAA 3'

query 3' UGCUUGUUUCUUGAAGAAGUU 5'  
query=miR6156, target=R03G\_12968, score=0.5, range=406-426, stran  
target 5' ACGGACAAAGAACUUCUUCAA 3'

query 3' UGCUUGUUUCUUGAAGAAGUU 5'  
query=miR6156, target=R03G\_05954, score=0.5, range=406-426, stran  
target 5' ACGGACAAAGAACUUCUUCAA 3'

query 3' UGCUUGUUUCUUGAAGAAGUU 5'  
query=miR6156, target=R03G\_12185, score=0.5, range=634-654, stran  
target 5' ACGGACAAAGAACUUCUUCAA 3'

query 3' UGCUUGUUUCUUGAAGAAGUU 5'  
query=miR6156, target=R03G\_05911, score=0.5, range=259-279, stran  
target 5' ACGGACAAAGAACUUCUUCAA 3'

query 3' UGCUUGUUUCUUGAAGAAGUU 5'  
query=miR6156, target=R03G\_14559, score=0.5, range=634-654, stran  
target 5' ACGGACAAAGAACUUCUUCAA 3'  
.....  
query 3' UGCUUGUUUCUUGAAGAAGUU 5'  
query=miR6156, target=R03G\_09185, score=0.5, range=634-654, stran  
target 5' ACGGACAAAGAACUUCUUCAA 3'  
.....  
query 3' UGCUUGUUUCUUGAAGAAGUU 5'  
query=miR6156, target=R03G\_00260, score=0.5, range=406-426, stran  
target 5' ACGGACAAAGAACUUCUUCAA 3'  
.....  
query 3' UGCUUGUUUCUUGAAGAAGUU 5'  
query=miR6156, target=R03G\_16128, score=0.5, range=406-426, stran  
target 5' ACGGACAAAGAACUUCUUCAA 3'  
.....  
query 3' UGCUUGUUUCUUGAAGAAGUU 5'  
query=miR6156, target=R03G\_10047, score=0.5, range=406-426, stran  
target 5' ACGGACAAAGAACUUCUUCAA 3'  
.....  
query 3' UGCUUGUUUCUUGAAGAAGUU 5'  
query=miR6156, target=R03G\_07691, score=0.5, range=406-426, stran  
target 5' ACGGACAAAGAACUUCUUCAA 3'  
.....  
query 3' UGCUUGUUUCUUGAAGAAGUU 5'  
query=miR6156, target=R03G\_01724, score=0.5, range=406-426, stran  
target 5' ACGGACAAAGAACUUCUUCAA 3'  
.....  
query 3' UGCUUGUUUCUUGAAGAAGUU 5'  
query=miR6156, target=R03G\_01199, score=0.5, range=406-426, stran  
target 5' ACGGACAAAGAACUUCUUCAA 3'  
.....  
query 3' UGCUUGUUUCUUGAAGAAGUU 5'  
query=miR6156, target=R03G\_13712, score=0.5, range=406-426, stran  
target 5' ACGGACAAAGAACUUCUUCAA 3'  
.....  
query 3' UGCUUGUUUCUUGAAGAAGUU 5'  
query=miR6156, target=R03G\_17434, score=0.5, range=406-426, stran  
target 5' ACGGACAAAGAACUUCUUCAA 3'  
.....  
query 3' UGCUUGUUUCUUGAAGAAGUU 5'  
query=miR6156, target=R03G\_02232, score=0.5, range=361-381, stran  
target 5' ACGGACAAAGAACUUCUUCAA 3'  
.....  
query 3' UGCUUGUUUCUUGAAGAAGUU 5'

query=miR6156, target=R03G\_10518, score=0.5, range=559-579, stran  
target 5' ACGAACGAAGAACUUCUCAA 3'  
:::::.....  
query 3' UGCUUGUUUCUUGAAGAAGUU 5'  
query=miR6156, target=R03G\_05426, score=0.5, range=406-426, stran  
target 5' ACGGACAAAGAACUUCUCAA 3'  
:::::.....  
query 3' UGCUUGUUUCUUGAAGAAGUU 5'  
query=miR6156, target=R03G\_16899, score=1, range=559-579, strand=  
target 5' ACGAACAAAGAACUUUUCAA 3'  
:::::.....  
query 3' UGCUUGUUUCUUGAAGAAGUU 5'  
query=miR6156, target=R03G\_04683, score=3, range=478-498, strand=  
target 5' ACGAACAAAAACUUCUUUAA 3'  
:::::..... :.....  
query 3' UGCUUGUUUCUUGAAGAAGUU 5'  
query=miR6156, target=R03G\_13273, score=3.5, range=478-498, stran  
target 5' ACGAGCAAAAACUUCUUUAA 3'  
:::::..... :.....  
query 3' UGCUUGUUUCUUGAAGAAGUU 5'  
query=miR6156, target=R03G\_13145, score=3.5, range=478-498, stran  
target 5' ACGAGCAAAAACUUCUUUAA 3'  
:::::..... :.....  
query 3' UGCUUGUUUCUUGAAGAAGUU 5'  
query=miR6156, target=R03G\_16749, score=3.5, range=478-498, stran  
target 5' ACGAGCAAAAACUUCUUUAA 3'  
:::::..... :.....  
query 3' UGCUUGUUUCUUGAAGAAGUU 5'  
query=miR6156, target=R03G\_10217, score=3.5, range=478-498, stran  
target 5' ACGAGCAAAAACUUCUUUAA 3'  
:::::..... :.....  
query 3' UGCUUGUUUCUUGAAGAAGUU 5'  
query=miR6156, target=R03G\_11969, score=3.5, range=478-498, stran  
target 5' ACGAGCAAAAACUUCUUUAA 3'  
:::::..... :.....  
query 3' UGCUUGUUUCUUGAAGAAGUU 5'  
query=miR6156, target=R03G\_07307, score=3.5, range=478-498, stran  
target 5' ACGAGCAAAAACUUCUUUAA 3'  
:::::..... :.....  
query 3' UGCUUGUUUCUUGAAGAAGUU 5'  
query=miR6156, target=R03G\_11409, score=3.5, range=478-498, stran  
target 5' ACGAGCAAAAACUUCUUUAA 3'  
:::::..... :.....  
query 3' UGCUUGUUUCUUGAAGAAGUU 5'  
query=miR6156, target=R03G\_09930, score=3.5, range=478-498, stran



::::: :  
query 3' UGCUUGUUUCUUGAAGAAGUU 5'  
query=miR6156, target=R03G\_02056, score=3.5, range=89-108, strand  
target 5' ACG-ACGAAGAACUUCUUGAA 3'  
:: :  
query 3' UGCUUGUUUCUUGAAGAAGUU 5'  
query=miR6156, target=R03G\_03999, score=3.5, range=89-108, strand  
target 5' ACG-ACGAAGAACUUCUUGAA 3'  
:: :  
query 3' UGCUUGUUUCUUGAAGAAGUU 5'  
query=miR6156, target=R03G\_10490, score=3.5, range=89-108, strand  
target 5' ACG-ACGAAGAACUUCUUGAA 3'  
:: :  
query 3' UGCUUGUUUCUUGAAGAAGUU 5'  
query=miR6156, target=R03G\_00809, score=4, range=974-993, strand=  
target 5' AU-AAAGAAGAACUUCUUUAA 3'  
.: :  
query 3' UGCUUGUUUCUUGAAGAAGUU 5'  
query=miR6156, target=R03G\_15046, score=4, range=1322-1341, stran  
target 5' UCGAAC-AAGAACUCCUUCAA 3'  
:::: :  
query 3' UGCUUGUUUCUUGAAGAAGUU 5'  
query=miR6156, target=R03G\_14251, score=4, range=734-754, strand=  
target 5' AUGAACAGAGCGCUUCUUCAA 3'  
::::: :  
query 3' UGCUUGUUUCUUGAAGAAGUU 5'  
query=miR6156, target=R03G\_10498, score=4, range=1223-1243, stran  
target 5' ACUUGCGAAGAACUUCUUUAA 3'  
:: :  
query 3' UGCUUGUUUCUUGAAGAAGUU 5'  
query=miR6156, target=R03G\_08677, score=4, range=668-687, strand=  
target 5' ACGAGCCAAGAA-UUCUUCAG 3'  
::::: :  
query 3' UGCUUGUUUCUUGAAGAAGUU 5'  
query=miR6156, target=R03G\_12153, score=4, range=1571-1590, stran  
target 5' ACAAUCAAAG-ACUUCUUCAA 3'  
:: :  
query 3' UGCUUGUUUCUUGAAGAAGUU 5'  
query=miR6156, target=R03G\_10466, score=4, range=214-233, strand=  
target 5' GCUUGC-AAGAACUUCUUCAA 3'  
.: :  
query 3' UGCUUGUUUCUUGAAGAAGUU 5'  
query=miR6156, target=R03G\_08561, score=4, range=284-303, strand=  
target 5' ACGAAC-CAGAAUUCUUUAA 3'  
::::: :  
::::: :



query=miR6464, target=R03G\_17255, score=0, range=605-625, strand=  
target 5' AUCAACAUCAACAAGCAAACA 3'  
:~::~  
query 3' UAGUUGUAGUUGUUCGUUUGU 5'  
query=miR6464, target=R03G\_10532, score=1, range=605-625, strand=  
target 5' AUCAACAUCAACAAGCAAUA 3'  
:~::~  
query 3' UAGUUGUAGUUGUUCGUUUGU 5'  
query=miR6464, target=R03G\_10747, score=1, range=719-739, strand=  
target 5' AUCAACAUCAACAAGCAAUA 3'  
:~::~  
query 3' UAGUUGUAGUUGUUCGUUUGU 5'  
query=miR6464, target=R03G\_16366, score=1.5, range=605-625, stran  
target 5' AUCAACAUCAACAAGCAAUG 3'  
:~::~  
query 3' UAGUUGUAGUUGUUCGUUUGU 5'  
query=miR6464, target=R03G\_11979, score=1.5, range=589-609, stran  
target 5' AUCAACAUCAACAAGCAAUG 3'  
:~::~  
query 3' UAGUUGUAGUUGUUCGUUUGU 5'  
query=miR6464, target=R03G\_13448, score=1.5, range=605-625, stran  
target 5' AUCAACAUCAACAAGCAAUG 3'  
:~::~  
query 3' UAGUUGUAGUUGUUCGUUUGU 5'  
query=miR6464, target=R03G\_10543, score=1.5, range=77-97, strand=  
target 5' AUCAACAUCAACAAGCAAUG 3'  
:~::~  
query 3' UAGUUGUAGUUGUUCGUUUGU 5'  
query=miR6464, target=R03G\_07862, score=2, range=719-739, strand=  
target 5' AUCAACAUCAGCAAGCAAUA 3'  
:~::~  
query 3' UAGUUGUAGUUGUUCGUUUGU 5'  
query=miR6464, target=R03G\_10744, score=2, range=605-625, strand=  
target 5' AUCAACAUCAGCAAGCAAUA 3'  
:~::~  
query 3' UAGUUGUAGUUGUUCGUUUGU 5'  
query=miR6464, target=R03G\_09173, score=2, range=719-739, strand=  
target 5' AUCAACAUCAGCAAGCAAUA 3'  
:~::~  
query 3' UAGUUGUAGUUGUUCGUUUGU 5'  
query=miR6464, target=R03G\_17218, score=2, range=605-625, strand=  
target 5' AUCAACAUCAACAAGCGAAUA 3'  
:~::~  
query 3' UAGUUGUAGUUGUUCGUUUGU 5'  
query=miR6464, target=R03G\_17253, score=2, range=605-625, strand=





::::: :: :::::::::::::::  
query 3' UAGUU-GUAGUUGUUCGUUUGU 5'  
query=miR6464, target=R03G\_14089, score=3, range=19-40, strand=1  
target 5' AUCAAUCAACAACAAGCAGACA 3'  
::::: :: :::::::::::::::  
query 3' UAGUU-GUAGUUGUUCGUUUGU 5'  
query=miR6464, target=R03G\_03317, score=3, range=829-849, strand=  
target 5' AUCAAUAUCAACAGGUAAACG 3'  
::::: :::::::::::::::  
query 3' UAGUUGUAGUUGUUCGUUUGU 5'  
query=miR6464, target=R03G\_09805, score=3.5, range=472-493, stran  
target 5' AUUAAUCAGCAACAAGCAGACA 3'  
::::: :: :::::::::::::::  
query 3' UAGUU-GUAGUUGUUCGUUUGU 5'  
query=miR6464, target=R03G\_00530, score=3.5, range=97-118, strand  
target 5' AUUAAUCAGCAACAAGCAGACA 3'  
::::: :: :::::::::::::::  
query 3' UAGUU-GUAGUUGUUCGUUUGU 5'  
query=miR6464, target=R03G\_07259, score=3.5, range=2026-2045, str  
target 5' AUC-ACGUCCACAAGCAAACA 3'  
::: ::::: :::::::::::::::  
query 3' UAGUUGUAGUUGUUCGUUUGU 5'  
query=miR6464, target=R03G\_09333, score=3.5, range=331-350, stran  
target 5' AUCAUUAUCAACAA-CAAACA 3'  
::::: . ::::::::::::::: :::::::  
query 3' UAGUUGUAGUUGUUCGUUUGU 5'  
query=miR6464, target=R03G\_00639, score=3.5, range=562-581, stran  
target 5' AUCAAU-UUGACAAGCAAACA 3'  
::::: . ::::::::::::::: :::::::  
query 3' UAGUUGUAGUUGUUCGUUUGU 5'  
query=miR6464, target=R03G\_05074, score=4, range=1688-1708, stran  
target 5' AUCAACAACAGCAAGUAAACU 3'  
::::: :: :::::::::::::::  
query 3' UAGUUGUAGUUGUUCGUUUGU 5'  
query=miR6464, target=R03G\_13401, score=4, range=686-706, strand=  
target 5' AUCAACGCCAACAAGCACACG 3'  
::::: . ::::::::::::::: :::  
query 3' UAGUUGUAGUUGUUCGUUUGU 5'  
query=miR6464, target=R03G\_14450, score=4, range=42-63, strand=1  
target 5' AUCUUACAUCA AUGAGCAAACA 3'  
::: :::::::::::::::  
query 3' UAG-UUGUAGUUGUUCGUUUGU 5'  
query=miR6464, target=R03G\_17083, score=4, range=153-173, strand=  
target 5' AGCAACAUCAACAAACAAACC 3'  
: ::::::::::::::: :::::::

```

query 3' UAGUUGUAGUUGUUCGUUUGU 5'
query=miR6464, target=R03G_07291, score=4, range=1250-1270, stran
target 5' CUCAACAACAACAAGAAAACA 3'
: : : : : : : : : :
query 3' UAGUUGUAGUUGUUCGUUUGU 5'
query=miR6464, target=R03G_04620, score=4, range=854-873, strand=
target 5' AUCAUCAUCAACAA-CAGACA 3'
: : : : : : : : : :
query 3' UAGUUGUAGUUGUUCGUUUGU 5'
query=miR6464, target=R03G_04140, score=4, range=395-414, strand=
target 5' AUCAACAACAACAAG-AGACA 3'
: : : : : : : : : :
query 3' UAGUUGUAGUUGUUCGUUUGU 5'
query=miR6464, target=R03G_15991, score=4, range=959-980, strand=
target 5' AACACAACAACAAGCAGAACA 3'
: : : : : : : : : :
query 3' UAGUUGUAGUUGUUCGU-UUGU 5'
query=miR6464, target=R03G_17097, score=4, range=676-697, strand=
target 5' AUCAAUCAGCAACAAGCACACA 3'
: : : : : : : : : :
query 3' UAGUU-GUAGUUGUUCGUUUGU 5'
query=miR6464, target=R03G_00154, score=4, range=47-66, strand=1
target 5' AUAUCAUCAACAAG-AAACA 3'
: : : : : : : : : :
query 3' UAGUUGUAGUUGUUCGUUUGU 5'
query=miR6464, target=R03G_01487, score=4, range=18-37, strand=1
target 5' AACACAACAACAACAA-CAAACA 3'
: : : : : : : : : :
query 3' UAGUUGUAGUUGUUCGUUUGU 5'
query=miR6464, target=R03G_00781, score=4, range=2404-2423, stran
target 5' GACAAUAUCAAC-AGCAAACA 3'
. : : : : : : : : :
query 3' UAGUUGUAGUUGUUCGUUUGU 5'
query=miR6464, target=R03G_01599, score=4, range=275-294, strand=
target 5' AGCAACAACAACAA-CAAACA 3'
: : : : : : : : : :
query 3' UAGUUGUAGUUGUUCGUUUGU 5'
query=miR6464, target=R03G_12687, score=4, range=232-252, strand=
target 5' AUUGACAACAACAAGAAAACA 3'
: : : : : : : : : :
query 3' UAGUUGUAGUUGUUCGUUUGU 5'
query=miR6464, target=R03G_02376, score=4, range=3656-3675, stran
target 5' AUAAACACCAACAAGC-AACA 3'
: : : : : : : : : :
query 3' UAGUUGUAGUUGUUCGUUUGU 5'

```





::::: : :: :::::::::::::::  
query 3' UAAAA-UCGUACUGUUACUAGGAU 5'  
query=miR5512a, target=R03G\_03785, score=4, range=326-349, strand  
target 5' AUUUUCAACACGACAGUGAUCCUA 3'  
::::: : :: :::::::::::::::  
query 3' UAAAA-UCGUACUGUUACUAGGAU 5'  
query=miR5512a, target=R03G\_14620, score=4, range=149-172, strand  
target 5' AUUUUCAACACGACAGUGAUCCUA 3'  
::::: : :: :::::::::::::::  
query 3' UAAAA-UCGUACUGUUACUAGGAU 5'  
query=miR5512a, target=R03G\_17349, score=4, range=13-35, strand=-  
target 5' AUUUUAGCAUGACAAUGACCCAA 3'  
::::: : :: :::::::::::::::  
query 3' UAAAAUCGUACUGUUACUAGGAU 5'  
query=miR5512a, target=R03G\_16894, score=4, range=13-35, strand=-  
target 5' AUUUUAGCAUGACAAUGACCCAA 3'  
::::: : :: :::::::::::::::  
query 3' UAAAAUCGUACUGUUACUAGGAU 5'  
query=miR5144-3p, target=R03G\_10780, score=0, range=350-373, stra  
target 5' CUUUCUUGUGCUGUGCAGUGAGUA 3'  
::::: : :: :::::::::::::::  
query 3' GAAAGAACACGACACGUCACUCAU 5'  
query=miR5144-3p, target=R03G\_10773, score=0, range=350-373, stra  
target 5' CUUUCUUGUGCUGUGCAGUGAGUA 3'  
::::: : :: :::::::::::::::  
query 3' GAAAGAACACGACACGUCACUCAU 5'  
query=miR5144-3p, target=R03G\_04210, score=0, range=350-373, stra  
target 5' CUUUCUUGUGCUGUGCAGUGAGUA 3'  
::::: : :: :::::::::::::::  
query 3' GAAAGAACACGACACGUCACUCAU 5'  
query=miR5144-3p, target=R03G\_09542, score=0, range=350-373, stra  
target 5' CUUUCUUGUGCUGUGCAGUGAGUA 3'  
::::: : :: :::::::::::::::  
query 3' GAAAGAACACGACACGUCACUCAU 5'  
query=miR5144-3p, target=R03G\_17449, score=0, range=350-373, stra  
target 5' CUUUCUUGUGCUGUGCAGUGAGUA 3'  
::::: : :: :::::::::::::::  
query 3' GAAAGAACACGACACGUCACUCAU 5'  
query=miR5144-3p, target=R03G\_09967, score=0, range=350-373, stra  
target 5' CUUUCUUGUGCUGUGCAGUGAGUA 3'  
::::: : :: :::::::::::::::  
query 3' GAAAGAACACGACACGUCACUCAU 5'  
query=miR5144-3p, target=R03G\_04207, score=0, range=350-373, stra  
target 5' CUUUCUUGUGCUGUGCAGUGAGUA 3'  
::::: : :: :::::::::::::::

query 3' GAAAGAACACGACACGUCACUCAU 5'  
query=miR5144-3p, target=R03G\_05267, score=0, range=350-373, strand  
target 5' CUUUCUUGUGCUGUGCAGUGAGUA 3'  
.....  
query 3' GAAAGAACACGACACGUCACUCAU 5'  
query=miR5144-3p, target=R03G\_14361, score=0, range=350-373, strand  
target 5' CUUUCUUGUGCUGUGCAGUGAGUA 3'  
.....  
query 3' GAAAGAACACGACACGUCACUCAU 5'  
query=miR5144-3p, target=R03G\_00256, score=0, range=350-373, strand  
target 5' CUUUCUUGUGCUGUGCAGUGAGUA 3'  
.....  
query 3' GAAAGAACACGACACGUCACUCAU 5'  
query=miR5144-3p, target=R03G\_05921, score=0, range=350-373, strand  
target 5' CUUUCUUGUGCUGUGCAGUGAGUA 3'  
.....  
query 3' GAAAGAACACGACACGUCACUCAU 5'  
query=miR5144-3p, target=R03G\_01942, score=0, range=350-373, strand  
target 5' CUUUCUUGUGCUGUGCAGUGAGUA 3'  
.....  
query 3' GAAAGAACACGACACGUCACUCAU 5'  
query=miR5144-3p, target=R03G\_09194, score=0, range=350-373, strand  
target 5' CUUUCUUGUGCUGUGCAGUGAGUA 3'  
.....  
query 3' GAAAGAACACGACACGUCACUCAU 5'  
query=miR5144-3p, target=R03G\_10729, score=0, range=350-373, strand  
target 5' CUUUCUUGUGCUGUGCAGUGAGUA 3'  
.....  
query 3' GAAAGAACACGACACGUCACUCAU 5'  
query=miR5144-3p, target=R03G\_05939, score=0, range=350-373, strand  
target 5' CUUUCUUGUGCUGUGCAGUGAGUA 3'  
.....  
query 3' GAAAGAACACGACACGUCACUCAU 5'  
query=miR5144-3p, target=R03G\_07124, score=0, range=350-373, strand  
target 5' CUUUCUUGUGCUGUGCAGUGAGUA 3'  
.....  
query 3' GAAAGAACACGACACGUCACUCAU 5'  
query=miR5144-3p, target=R03G\_17069, score=0, range=215-238, strand  
target 5' CUUUCUUGUGCUGUGCAGUGAGUA 3'  
.....  
query 3' GAAAGAACACGACACGUCACUCAU 5'  
query=miR5144-3p, target=R03G\_09945, score=0, range=74-97, strand  
target 5' CUUUCUUGUGCUGUGCAGUGAGUA 3'  
.....  
query 3' GAAAGAACACGACACGUCACUCAU 5'

query=miR5144-3p, target=R03G\_15664, score=0, range=350-373, str  
target 5' CUUUCUUGUGCUGUGCAGUGAGUA 3'  
:::::::::::  
query 3' GAAAGAACACGACACGUCACUCAU 5'  
query=miR5144-3p, target=R03G\_11264, score=0, range=350-373, str  
target 5' CUUUCUUGUGCUGUGCAGUGAGUA 3'  
:::::::::::  
query 3' GAAAGAACACGACACGUCACUCAU 5'  
query=miR5144-3p, target=R03G\_02956, score=0, range=350-373, str  
target 5' CUUUCUUGUGCUGUGCAGUGAGUA 3'  
:::::::::::  
query 3' GAAAGAACACGACACGUCACUCAU 5'  
query=miR5144-3p, target=R03G\_05435, score=0, range=350-373, str  
target 5' CUUUCUUGUGCUGUGCAGUGAGUA 3'  
:::::::::::  
query 3' GAAAGAACACGACACGUCACUCAU 5'  
query=miR5144-3p, target=R03G\_10743, score=0, range=350-373, str  
target 5' CUUUCUUGUGCUGUGCAGUGAGUA 3'  
:::::::::::  
query 3' GAAAGAACACGACACGUCACUCAU 5'  
query=miR5144-3p, target=R03G\_07038, score=0, range=350-373, str  
target 5' CUUUCUUGUGCUGUGCAGUGAGUA 3'  
:::::::::::  
query 3' GAAAGAACACGACACGUCACUCAU 5'  
query=miR5144-3p, target=R03G\_07040, score=0, range=350-373, str  
target 5' CUUUCUUGUGCUGUGCAGUGAGUA 3'  
:::::::::::  
query 3' GAAAGAACACGACACGUCACUCAU 5'  
query=miR5144-3p, target=R03G\_07030, score=0, range=350-373, str  
target 5' CUUUCUUGUGCUGUGCAGUGAGUA 3'  
:::::::::::  
query 3' GAAAGAACACGACACGUCACUCAU 5'  
query=miR5144-3p, target=R03G\_16142, score=0, range=353-376, str  
target 5' CUUUCUUGUGCUGUGCAGUGAGUA 3'  
:::::::::::  
query 3' GAAAGAACACGACACGUCACUCAU 5'  
query=miR5144-3p, target=R03G\_05264, score=0, range=350-373, str  
target 5' CUUUCUUGUGCUGUGCAGUGAGUA 3'  
:::::::::::  
query 3' GAAAGAACACGACACGUCACUCAU 5'  
query=miR5144-3p, target=R03G\_12070, score=0, range=350-373, str  
target 5' CUUUCUUGUGCUGUGCAGUGAGUA 3'  
:::::::::::  
query 3' GAAAGAACACGACACGUCACUCAU 5'  
query=miR5144-3p, target=R03G\_16798, score=0, range=350-373, str



target 5' CUUUCUUGUGCUGUGCAGUGAGUA 3'  
:~::~  
query 3' GAAAGAACACGACACGUCACUCAU 5'  
query=miR5144-3p, target=R03G\_16796, score=0, range=350-373, stra  
target 5' CUUUCUUGUGCUGUGCAGUGAGUA 3'  
:~::~  
query 3' GAAAGAACACGACACGUCACUCAU 5'  
query=miR5144-3p, target=R03G\_04803, score=0, range=350-373, stra  
target 5' CUUUCUUGUGCUGUGCAGUGAGUA 3'  
:~::~  
query 3' GAAAGAACACGACACGUCACUCAU 5'  
query=miR5144-3p, target=R03G\_10516, score=0, range=350-373, stra  
target 5' CUUUCUUGUGCUGUGCAGUGAGUA 3'  
:~::~  
query 3' GAAAGAACACGACACGUCACUCAU 5'  
query=miR5144-3p, target=R03G\_05953, score=0.5, range=350-373,  
strand=-1  
target 5' CUUUUUUGUGCUGUGCAGUGAGUA 3'  
:~::~  
query 3' GAAAGAACACGACACGUCACUCAU 5'  
query=miR5144-3p, target=R03G\_11966, score=0.5, range=350-373,  
strand=-1  
target 5' CUUUUUUGUGCUGUGCAGUGAGUA 3'  
:~::~  
query 3' GAAAGAACACGACACGUCACUCAU 5'  
query=miR5144-3p, target=R03G\_17325, score=0.5, range=350-373,  
strand=-1  
target 5' CUUUUUUGUGCUGUGCAGUGAGUA 3'  
:~::~  
query 3' GAAAGAACACGACACGUCACUCAU 5'  
query=miR5144-3p, target=R03G\_08660, score=0.5, range=350-373,  
strand=-1  
target 5' UUUUCUUGUGCUGUGCAGUGAGUA 3'  
:~::~  
query 3' GAAAGAACACGACACGUCACUCAU 5'  
query=miR5144-3p, target=R03G\_07860, score=2, range=350-373, stra  
target 5' CUUUCUUGUGCUCUGCAGUGAGUA 3'  
:~::~  
query 3' GAAAGAACACGACACGUCACUCAU 5'  
query=miR5144-3p, target=R03G\_16431, score=2, range=218-241, stra  
target 5' CUUUCUUGUGCUGUACAGUGAGUA 3'  
:~::~  
query 3' GAAAGAACACGACACGUCACUCAU 5'  
query=miR5144-3p, target=R03G\_03557, score=2, range=176-199, stra  
target 5' CUUUCUUGUGCUGCGCAGUGAGUA 3'

query 3' GAAAGAACACGACACGUCACUCAU 5'  
query=miR5144-3p, target=R03G\_05959, score=2.5, range=350-373,  
strand=-1  
target 5' CUUUUUUGUGCUGUGCAGCGAGUA 3'  
query 3' GAAAGAACACGACACGUCACUCAU 5'  
query=miR5144-3p, target=R03G\_14568, score=2.5, range=350-373,  
strand=-1  
target 5' CUUUUUUGUGCUGUGCAGCGAGUA 3'  
query 3' GAAAGAACACGACACGUCACUCAU 5'  
query=miR5144-3p, target=R03G\_10798, score=2.5, range=350-373,  
strand=-1  
target 5' CUUUUUUGUGCUGUGCAGCGAGUA 3'  
query 3' GAAAGAACACGACACGUCACUCAU 5'  
query=miR5144-3p, target=R03G\_16689, score=2.5, range=350-373,  
strand=-1  
target 5' CUUUUUUGUGCUGUGCAGCGAGUA 3'  
query 3' GAAAGAACACGACACGUCACUCAU 5'  
query=miR5144-3p, target=R03G\_17308, score=2.5, range=350-373,  
strand=-1  
target 5' CUUUUUUGUGCUGUGCAGCGAGUA 3'  
query 3' GAAAGAACACGACACGUCACUCAU 5'  
query=miR5144-3p, target=R03G\_05628, score=2.5, range=350-373,  
strand=-1  
target 5' CUUUUUUGUGCUGUGCAGCGAGUA 3'  
query 3' GAAAGAACACGACACGUCACUCAU 5'  
query=miR5144-3p, target=R03G\_11238, score=2.5, range=218-241,  
strand=-1  
target 5' CUUUUUUGUGCUGUGCAGCGAGUA 3'  
query 3' GAAAGAACACGACACGUCACUCAU 5'  
query=miR5144-3p, target=R03G\_07103, score=2.5, range=74-97, stra  
target 5' CUUUUUUGUGCUGUGCAGCGAGUA 3'  
query 3' GAAAGAACACGACACGUCACUCAU 5'  
query=miR894, target=R03G\_07465, score=3, range=343-362, strand=1  
target 5' GAUGAACUCCGACGUGAAAC 3'  
query 3' CCACUUG-GGCUGCACUUUG 5'

query=miR894, target=R03G\_04258, score=4, range=37-56, strand=1  
target 5' GAUGAACUUCGACGUGAAAC 3'  
: ::::: .:::::::::::::  
query 3' CCACUUG-GGCUGCACUUUG 5'  
query=miR894, target=R03G\_08009, score=4, range=208-227, strand=1  
target 5' GAUGAACUUCGACGUGAAAC 3'  
: ::::: .:::::::::::::  
query 3' CCACUUG-GGCUGCACUUUG 5'  
query=miR4385, target=R03G\_15671, score=0, range=1485-1506, stran  
target 5' ACCAAUCCUUUUUACAACAUUA 3'  
:::::::::::::  
query 3' UGGUUAGGAAAAAUGUUGUAAU 5'  
query=miR4385, target=R03G\_15169, score=0, range=1482-1503, stran  
target 5' ACCAAUCCUUUUUACAACAUUA 3'  
:::::::::::::  
query 3' UGGUUAGGAAAAAUGUUGUAAU 5'  
query=miR4385, target=R03G\_07740, score=0, range=1485-1506, stran  
target 5' ACCAAUCCUUUUUACAACAUUA 3'  
:::::::::::::  
query 3' UGGUUAGGAAAAAUGUUGUAAU 5'  
query=miR4385, target=R03G\_01208, score=0, range=1098-1119, stran  
target 5' ACCAAUCCUUUUUACAACAUUA 3'  
:::::::::::::  
query 3' UGGUUAGGAAAAAUGUUGUAAU 5'  
query=miR4385, target=R03G\_11965, score=0, range=1482-1503, stran  
target 5' ACCAAUCCUUUUUACAACAUUA 3'  
:::::::::::::  
query 3' UGGUUAGGAAAAAUGUUGUAAU 5'  
query=miR4385, target=R03G\_16746, score=0, range=1284-1305, stran  
target 5' ACCAAUCCUUUUUACAACAUUA 3'  
:::::::::::::  
query 3' UGGUUAGGAAAAAUGUUGUAAU 5'  
query=miR4385, target=R03G\_01616, score=0, range=1485-1506, stran  
target 5' ACCAAUCCUUUUUACAACAUUA 3'  
:::::::::::::  
query 3' UGGUUAGGAAAAAUGUUGUAAU 5'  
query=miR4385, target=R03G\_05411, score=0, range=57-78, strand=-1  
target 5' ACCAAUCCUUUUUACAACAUUA 3'  
:::::::::::::  
query 3' UGGUUAGGAAAAAUGUUGUAAU 5'  
query=miR4385, target=R03G\_10873, score=1, range=1485-1506, stran  
target 5' ACCAAUCCUUUUUACAACGUUA 3'  
:::::::::::::  
query 3' UGGUUAGGAAAAAUGUUGUAAU 5'  
query=miR4385, target=R03G\_16691, score=1, range=1485-1506, stran



. :  
query 3' GUGGAUACAAAAGAGGGU 5'  
query=miR5239, target=R03G\_11275, score=3.5, range=2981-2998, str  
target 5' UACCUAUGUUUUCUCGCU 3'  
. :  
query 3' GUGGAUACAAAAGAGGGU 5'  
query=miR5239, target=R03G\_11403, score=3.5, range=2981-2998, str  
target 5' UACCUAUGUUUUCUCGCU 3'  
. :  
query 3' GUGGAUACAAAAGAGGGU 5'  
query=miR5239, target=R03G\_15869, score=3.5, range=2981-2998, str  
target 5' UACCUAUGUUUUCUCGCU 3'  
. :  
query 3' GUGGAUACAAAAGAGGGU 5'  
query=miR5239, target=R03G\_01718, score=3.5, range=2981-2998, str  
target 5' UACCUAUGUUUUCUCGCU 3'  
. :  
query 3' GUGGAUACAAAAGAGGGU 5'  
query=miR5239, target=R03G\_01203, score=3.5, range=2981-2998, str  
target 5' UACCUAUGUUUUCUCGCU 3'  
. :  
query 3' GUGGAUACAAAAGAGGGU 5'  
query=miR5239, target=R03G\_10560, score=3.5, range=2981-2998, str  
target 5' UACCUAUGUUUUCUCGCU 3'  
. :  
query 3' GUGGAUACAAAAGAGGGU 5'  
query=miR5239, target=R03G\_10555, score=3.5, range=2822-2839, str  
target 5' UACCUAUGUUUUCUCGCU 3'  
. :  
query 3' GUGGAUACAAAAGAGGGU 5'  
query=miR5239, target=R03G\_03103, score=3.5, range=2822-2839, str  
target 5' UACCUAUGUUUUCUCGCU 3'  
. :  
query 3' GUGGAUACAAAAGAGGGU 5'  
query=miR5239, target=R03G\_12979, score=3.5, range=2822-2839, str  
target 5' UACCUAUGUUUUCUCGCU 3'  
. :  
query 3' GUGGAUACAAAAGAGGGU 5'  
query=miR5239, target=R03G\_08612, score=3.5, range=2822-2839, str  
target 5' UACCUAUGUUUUCUCGCU 3'  
. :  
query 3' GUGGAUACAAAAGAGGGU 5'  
query=miR5239, target=R03G\_12087, score=3.5, range=2822-2839, str  
target 5' UACCUAUGUUUUCUCGCU 3'  
. :

query 3' GUGGAUACAAAAGAGGGU 5'  
query=miR5239, target=R03G\_07305, score=3.5, range=2822-2839, str  
target 5' UACCUAUGUUUUCUCGCU 3'  
. :  
query 3' GUGGAUACAAAAGAGGGU 5'  
query=miR5239, target=R03G\_05280, score=3.5, range=2822-2839, str  
target 5' UACCUAUGUUUUCUCGCU 3'  
. :  
query 3' GUGGAUACAAAAGAGGGU 5'  
query=miR5239, target=R03G\_16686, score=3.5, range=2822-2839, str  
target 5' UACCUAUGUUUUCUCGCU 3'  
. :  
query 3' GUGGAUACAAAAGAGGGU 5'  
query=miR5239, target=R03G\_14704, score=3.5, range=2822-2839, str  
target 5' UACCUAUGUUUUCUCGCU 3'  
. :  
query 3' GUGGAUACAAAAGAGGGU 5'  
query=miR5239, target=R03G\_05630, score=3.5, range=2741-2758, str  
target 5' UACCUAUGUUUUCUCGCU 3'  
. :  
query 3' GUGGAUACAAAAGAGGGU 5'  
query=miR5239, target=R03G\_13450, score=3.5, range=2639-2656, str  
target 5' UACCUAUGUUUUCUCGCU 3'  
. :  
query 3' GUGGAUACAAAAGAGGGU 5'  
query=miR5239, target=R03G\_13859, score=3.5, range=2606-2623, str  
target 5' UACCUAUGUUUUCUCGCU 3'  
. :  
query 3' GUGGAUACAAAAGAGGGU 5'  
query=miR5239, target=R03G\_11970, score=3.5, range=2522-2539, str  
target 5' UACCUAUGUUUUCUCGCU 3'  
. :  
query 3' GUGGAUACAAAAGAGGGU 5'  
query=miR5239, target=R03G\_02235, score=3.5, range=2165-2182, str  
target 5' UACCUAUGUUUUCUCGCU 3'  
. :  
query 3' GUGGAUACAAAAGAGGGU 5'  
query=miR5239, target=R03G\_13152, score=3.5, range=2822-2839, str  
target 5' UACCUAUGUUUUCUCGCU 3'  
. :  
query 3' GUGGAUACAAAAGAGGGU 5'  
query=miR5239, target=R03G\_03988, score=3.5, range=2822-2839, str  
target 5' UACCUAUGUUUUCUCGCU 3'  
. :  
query 3' GUGGAUACAAAAGAGGGU 5'



query=miR5239, target=R03G\_08982, score=3.5, range=1151-1167,  
strand=-1  
target 5' UAUCU-UGUUUUCUCCCG 3'  
.....  
query 3' GUGGAUACAAAAGAGGGU 5'  
query=miR5239, target=R03G\_07205, score=3.5, range=457-474, stran  
target 5' CAUGUCUGUUUUCUCCCA 3'  
... : .....

query 3' GUGGAUACAAAAGAGGGU 5'  
query=miR5239, target=R03G\_15947, score=4, range=887-904, strand=  
target 5' UGCCUAUGUUUGCUCCUA 3'  
..... : .....

query 3' GUGGAUACAAAAGAGGGU 5'  
query=miR5239, target=R03G\_06471, score=4, range=186-203, strand=  
target 5' CAUUGGUGUUUUCUCCCU 3'  
.... : .....

query 3' GUGGAUACAAAAGAGGGU 5'  
query=miR5239, target=R03G\_08009, score=4, range=1931-1949, stran  
target 5' CACUAUGUUUUUCCCA 3'  
... : .....

query 3' GUGGAUA-CAAAAGAGGGU 5'  
query=miR5239, target=R03G\_13227, score=4, range=122-140, strand=  
target 5' CAACUGUGUUUAUCUCCCG 3'  
:: : .....

query 3' GUGGAUACAAA-AGAGGGU 5'  
query=miR5239, target=R03G\_15763, score=4, range=1749-1765, stran  
target 5' CAACUAUG-UUUCUCCCA 3'  
:: : .....

query 3' GUGGAUACAAAAGAGGGU 5'  
query=miR5239, target=R03G\_12102, score=4, range=1386-1402, stran  
target 5' CACCU-UGUUUGCUCCCA 3'  
..... : .....

query 3' GUGGAUACAAAAGAGGGU 5'  
query=miR5239, target=R03G\_13417, score=4, range=78-94, strand=1  
target 5' CAAUUAU-UUUUCUCCCG 3'  
:: : .....

query 3' GUGGAUACAAAAGAGGGU 5'  
query=miR5239, target=R03G\_06179, score=4, range=149-166, strand=  
target 5' UGCCUAUGUUUUCUUCUC 3'  
..... : .....

query 3' GUGGAUACAAAAGAGGGU 5'  
query=miR5239, target=R03G\_08339, score=4, range=1322-1339, stran  
target 5' AGUCCAUGUUUUCUCCCA 3'  
... : .....

query 3' GUGGAUACAAAAGAGGGU 5'



query=miR5239, target=R03G\_08916, score=4, range=1991-2008, stran  
target 5' CACCAAUGUCUUCUCUCA 3'  
:::: :::: ::::: :::  
query 3' GUGGAUACAAAAGAGGGU 5'  
query=miR5239, target=R03G\_07932, score=4, range=257-274, strand=  
target 5' CACCAAUCUUUUCUCCA 3'  
:::: :: ::::: :::  
query 3' GUGGAUACAAAAGAGGGU 5'  
query=miR5239, target=R03G\_12042, score=4, range=129-145, strand=  
target 5' CGCC-AUGUUUUCUUUCG 3'  
:::: ::::: :::  
query 3' GUGGAUACAAAAGAGGGU 5'  
query=miR5239, target=R03G\_12083, score=4, range=407-424, strand=  
target 5' CAUCGAUGUUUUCUCCAG 3'  
:::: ::::: :::  
query 3' GUGGAUACAAAAGAGGGU 5'  
query=miR5239, target=R03G\_04976, score=4, range=491-509, strand=  
target 5' CGCUUUUGUUUUCUCCACA 3'  
::::: ::::: :::  
query 3' GUGGAUACAAAAGAGG-GU 5'  
query=miR5239, target=R03G\_14378, score=4, range=2288-2305, stran  
target 5' CCCUCAUGUUUUCUCCG 3'  
: :. ::::: :::  
query 3' GUGGAUACAAAAGAGGGU 5'  
query=miR5239, target=R03G\_13112, score=4, range=1493-1510, stran  
target 5' UUUCA AUGUUUUCUCCA 3'  
. .: ::::: :::  
query 3' GUGGAUACAAAAGAGGGU 5'  
query=miR5239, target=R03G\_06194, score=4, range=1364-1380, stran  
target 5' CACC-AUGUAUUUCCCA 3'  
:::: ::::: :::  
query 3' GUGGAUACAAAAGAGGGU 5'  
query=miR5239, target=R03G\_02877, score=4, range=105-121, strand=  
target 5' CACC-AUGUUUACUCUCA 3'  
:::: ::::: :::  
query 3' GUGGAUACAAAAGAGGGU 5'  
query=miR5239, target=R03G\_12241, score=4, range=376-394, strand=  
target 5' CUCCAUAUGUUUUCUCUCC 3'  
: :: ::::: :::  
query 3' GUGG-AUACAAAAGAGGGU 5'  
query=miR845a, target=R03G\_15031, score=4, range=2663-2682, stran  
target 5' AUCAAUUGGUGUCAGGGCAG 3'  
::::: ::::: :::  
query 3' UAGUUAACCAUAGUCUCGGC 5'  
query=miR5252, target=R03G\_12976, score=0, range=220-241, strand=

```
target 5' GCAGACUUCAGUAGCUUUACAA 3'  
.....  
query 3' CGUCUGAAGUCAUCGAAAUGUU 5'  
query=miR5252, target=R03G_01717, score=0.5, range=220-241, stran  
target 5' GCAGGCUUCAGUAGCUUUACAA 3'  
.....  
query 3' CGUCUGAAGUCAUCGAAAUGUU 5'  
query=miR5252, target=R03G_12011, score=0.5, range=217-238, stran  
target 5' GCAGGCUUCAGUAGCUUUACAA 3'  
.....  
query 3' CGUCUGAAGUCAUCGAAAUGUU 5'  
query=miR5252, target=R03G_02817, score=0.5, range=220-241, stran  
target 5' GCAGGCUUCAGUAGCUUUACAA 3'  
.....  
query 3' CGUCUGAAGUCAUCGAAAUGUU 5'  
query=miR5252, target=R03G_17433, score=0.5, range=214-235, stran  
target 5' GCAGGCUUCAGUAGCUUUACAA 3'  
.....  
query 3' CGUCUGAAGUCAUCGAAAUGUU 5'  
query=miR5252, target=R03G_16743, score=0.5, range=163-184, stran  
target 5' GCAGGCUUCAGUAGCUUUACAA 3'  
.....  
query 3' CGUCUGAAGUCAUCGAAAUGUU 5'  
query=miR5252, target=R03G_07692, score=0.5, range=151-172, stran  
target 5' GCAGGCUUCAGUAGCUUUACAA 3'  
.....  
query 3' CGUCUGAAGUCAUCGAAAUGUU 5'  
query=miR5252, target=R03G_04659, score=0.5, range=151-172, stran  
target 5' GCAGGCUUCAGUAGCUUUACAA 3'  
.....  
query 3' CGUCUGAAGUCAUCGAAAUGUU 5'  
query=miR5252, target=R03G_10043, score=0.5, range=211-232, stran  
target 5' GCAGGCUUCAGUAGCUUUACAA 3'  
.....  
query 3' CGUCUGAAGUCAUCGAAAUGUU 5'  
query=miR5252, target=R03G_17460, score=0.5, range=241-262, stran  
target 5' GCAGGCUUCAGUAGCUUUACAA 3'  
.....  
query 3' CGUCUGAAGUCAUCGAAAUGUU 5'  
query=miR5252, target=R03G_13452, score=0.5, range=193-214, stran  
target 5' GCAGGCUUCAGUAGCUUUACAA 3'  
.....  
query 3' CGUCUGAAGUCAUCGAAAUGUU 5'  
query=miR5252, target=R03G_16369, score=0.5, range=196-217, stran  
target 5' GCAGGCUUCAGUAGCUUUACAA 3'
```

::::: query 3' CGUCUGAAGUCAUCGAAAUGUU 5'  
query=miR5252, target=R03G\_11543, score=0.5, range=217-238, stran  
target 5' GCAGGCUUCAGUAGCUUUACAA 3'  
:::::

::::: query 3' CGUCUGAAGUCAUCGAAAUGUU 5'  
query=miR5252, target=R03G\_14553, score=0.5, range=217-238, stran  
target 5' GCAGGCUUCAGUAGCUUUACAA 3'  
:::::

::::: query 3' CGUCUGAAGUCAUCGAAAUGUU 5'  
query=miR5252, target=R03G\_15887, score=0.5, range=241-262, stran  
target 5' GCAGGCUUCAGUAGCUUUACAA 3'  
:::::

::::: query 3' CGUCUGAAGUCAUCGAAAUGUU 5'  
query=miR5252, target=R03G\_01192, score=0.5, range=154-175, stran  
target 5' GCAGGCUUCAGUAGCUUUACAA 3'  
:::::

::::: query 3' CGUCUGAAGUCAUCGAAAUGUU 5'  
query=miR5252, target=R03G\_17265, score=0.5, range=118-139, stran  
target 5' GCAGGCUUCAGUAGCUUUACAA 3'  
:::::

::::: query 3' CGUCUGAAGUCAUCGAAAUGUU 5'  
query=miR5252, target=R03G\_05906, score=0.5, range=154-175, stran  
target 5' GCAGGCUUCAGUAGCUUUACAA 3'  
:::::

::::: query 3' CGUCUGAAGUCAUCGAAAUGUU 5'  
query=miR5252, target=R03G\_05347, score=0.5, range=217-238, stran  
target 5' GCAGGCUUCAGUAGCUUUACAA 3'  
:::::

::::: query 3' CGUCUGAAGUCAUCGAAAUGUU 5'  
query=miR5252, target=R03G\_17210, score=0.5, range=241-262, stran  
target 5' GCAGGCUUCAGUAGCUUUACAA 3'  
:::::

::::: query 3' CGUCUGAAGUCAUCGAAAUGUU 5'  
query=miR5252, target=R03G\_15879, score=2.5, range=217-239, stran  
target 5' GCAGGCUUCAGUAGGCUUUACAA 3'  
::::: :::::

::::: query 3' CGUCUGAAGUCAU-CGAAAUGUU 5'  
query=miR5252, target=R03G\_17244, score=2.5, range=214-235, stran  
target 5' GCAGGCUUCAGUAACUUUACAA 3'  
::::: :::::

::::: query 3' CGUCUGAAGUCAUCGAAAUGUU 5'  
query=miR5252, target=R03G\_16901, score=3.5, range=211-232, stran  
target 5' GCAGGAUUCAGUAGCUUCACAA 3'  
::::. :::::

```

query 3' CGUCUGAAGUCAUCGAAAUGUU 5'
query=miR5252, target=R03G_16917, score=3.5, range=217-238, stran
target 5' GCAGGAUUCAGUAGCUUCACAA 3'
..... : : : :
query 3' CGUCUGAAGUCAUCGAAAUGUU 5'
query=miR400, target=R03G_10001, score=3.5, range=130-149, strand
target 5' UGAUCUAUAAUAAUUUUCAUA 3'
.... : : : :
query 3' ACUGAAUAUUUAUGAGAGUAU 5'
query=miR400, target=R03G_12019, score=3.5, range=318-336, strand
target 5' CGACUUGUAAUACU-UCAUA 3'
..... : : : :
query 3' ACUGAAUAUUUAUGAGAGUAU 5'
query=miR400, target=R03G_13529, score=4, range=189-209, strand=-
target 5' UCAUUUGGUAUACUCUCAUC 3'
: : : : : : : : : :
query 3' ACUGAA-UAUUAUGAGAGUAU 5'
query=miR400, target=R03G_10373, score=4, range=970-990, strand=-
target 5' UGACUUAGUGAUACUCUGAUA 3'
..... : : : :
query 3' ACUGAAU-AUUUAUGAGAGUAU 5'
query=miR1108, target=R03G_10822, score=0, range=1093-1113, stran
target 5' GGGCGUUAUGUUUCCAGCUUA 3'
..... : : : :
query 3' CCCGCAAUACAAAGGUCGAAU 5'
query=miR1108, target=R03G_13723, score=1.5, range=1039-1059, str
target 5' GGAUGUUAUGUUUCCAGCUUA 3'
:: : : : :
query 3' CCCGCAAUACAAAGGUCGAAU 5'
query=miR1108, target=R03G_16906, score=1.5, range=208-228, stran
target 5' GGAUGUUAUGUUUCCAGCUUA 3'
:: : : : :
query 3' CCCGCAAUACAAAGGUCGAAU 5'
query=miR1108, target=R03G_01682, score=2.5, range=985-1005, stra
target 5' GGGUGUUAUGUUUCCAACUUA 3'
..... : : : :
query 3' CCCGCAAUACAAAGGUCGAAU 5'
query=miR164b, target=R03G_14967, score=3.5, range=915-934, stran
target 5' GUACGUCCUCUGCUUCUCCU 3'
..... : : : :
query 3' CGUGCACGGGACGAAGAGGU 5'
query=miR164b, target=R03G_07776, score=4, range=264-282, strand=
target 5' GAACGU-CCCUGCUUCUCUU 3'
: : : : : : : :
query 3' CGUGCACGGGACGAAGAGGU 5'

```

query=miR164b, target=R03G\_08297, score=4, range=537-555, strand=  
target 5' GC-CAUCCCCUGCUUCUUCA 3'  
:: : : :::::::::::::::  
query 3' CGUGCACGGGACGAAGAGGU 5'  
query=miR5207, target=R03G\_08154, score=3.5, range=2624-2645,  
strand=-1  
target 5' UUUCCAUUCAAACCUCUUUAG 3'  
:. :::::::::::::::  
query 3' AGCGGUAGGUUUUGGAGGAAUU 5'  
query=miR5207, target=R03G\_06603, score=3.5, range=512-532, stran  
target 5' UCUC-UCUUAAGACCUCCUUA 3'  
:: :: :::::::::::::::  
query 3' AGCGGUAGGUUUUGGAGGAAUU 5'  
query=miR5658, target=R03G\_16744, score=0, range=3642-3663, stran  
target 5' UUCUGCAACAUCAUCAUCA 3'  
:::::::::::::  
query 3' AAGACGUUGUAGUAGUAGUAGU 5'  
query=miR5658, target=R03G\_01203, score=0, range=3642-3663, stran  
target 5' UUCUGCAACAUCAUCAUCA 3'  
:::::::::::::  
query 3' AAGACGUUGUAGUAGUAGUAGU 5'  
query=miR5658, target=R03G\_11403, score=0, range=3642-3663, stran  
target 5' UUCUGCAACAUCAUCAUCA 3'  
:::::::::::::  
query 3' AAGACGUUGUAGUAGUAGUAGU 5'  
query=miR5658, target=R03G\_06416, score=0, range=3642-3663, stran  
target 5' UUCUGCAACAUCAUCAUCA 3'  
:::::::::::::  
query 3' AAGACGUUGUAGUAGUAGUAGU 5'  
query=miR5658, target=R03G\_01718, score=0, range=3642-3663, stran  
target 5' UUCUGCAACAUCAUCAUCA 3'  
:::::::::::::  
query 3' AAGACGUUGUAGUAGUAGUAGU 5'  
query=miR5658, target=R03G\_15869, score=0, range=3642-3663, stran  
target 5' UUCUGCAACAUCAUCAUCA 3'  
:::::::::::::  
query 3' AAGACGUUGUAGUAGUAGUAGU 5'  
query=miR5658, target=R03G\_10560, score=0, range=3642-3663, stran  
target 5' UUCUGCAACAUCAUCAUCA 3'  
:::::::::::::  
query 3' AAGACGUUGUAGUAGUAGUAGU 5'  
query=miR5658, target=R03G\_11275, score=0, range=3642-3663, stran  
target 5' UUCUGCAACAUCAUCAUCA 3'  
:::::::::::::  
query 3' AAGACGUUGUAGUAGUAGUAGU 5'

query=miR5658, target=R03G\_14704, score=0, range=3483-3504, stran  
target 5' UUCUGCAACAUCAUCAUCA 3'  
::::::::::::::::::::::::::  
query 3' AAGACGUUGUAGUAGUAGUAGU 5'  
query=miR5658, target=R03G\_12979, score=0, range=3483-3504, stran  
target 5' UUCUGCAACAUCAUCAUCA 3'  
::::::::::::::::::::::::::  
query 3' AAGACGUUGUAGUAGUAGUAGU 5'  
query=miR5658, target=R03G\_10555, score=0, range=3483-3504, stran  
target 5' UUCUGCAACAUCAUCAUCA 3'  
::::::::::::::::::::::::::  
query 3' AAGACGUUGUAGUAGUAGUAGU 5'  
query=miR5658, target=R03G\_05280, score=0, range=3483-3504, stran  
target 5' UUCUGCAACAUCAUCAUCA 3'  
::::::::::::::::::::::::::  
query 3' AAGACGUUGUAGUAGUAGUAGU 5'  
query=miR5658, target=R03G\_16686, score=0, range=3483-3504, stran  
target 5' UUCUGCAACAUCAUCAUCA 3'  
::::::::::::::::::::::::::  
query 3' AAGACGUUGUAGUAGUAGUAGU 5'  
query=miR5658, target=R03G\_07305, score=0, range=3483-3504, stran  
target 5' UUCUGCAACAUCAUCAUCA 3'  
::::::::::::::::::::::::::  
query 3' AAGACGUUGUAGUAGUAGUAGU 5'  
query=miR5658, target=R03G\_03103, score=0, range=3483-3504, stran  
target 5' UUCUGCAACAUCAUCAUCA 3'  
::::::::::::::::::::::::::  
query 3' AAGACGUUGUAGUAGUAGUAGU 5'  
query=miR5658, target=R03G\_12087, score=0, range=3483-3504, stran  
target 5' UUCUGCAACAUCAUCAUCA 3'  
::::::::::::::::::::::::::  
query 3' AAGACGUUGUAGUAGUAGUAGU 5'  
query=miR5658, target=R03G\_08612, score=0, range=3483-3504, stran  
target 5' UUCUGCAACAUCAUCAUCA 3'  
::::::::::::::::::::::::::  
query 3' AAGACGUUGUAGUAGUAGUAGU 5'  
query=miR5658, target=R03G\_05630, score=0, range=3402-3423, stran  
target 5' UUCUGCAACAUCAUCAUCA 3'  
::::::::::::::::::::::::::  
query 3' AAGACGUUGUAGUAGUAGUAGU 5'  
query=miR5658, target=R03G\_13450, score=0, range=3300-3321, stran  
target 5' UUCUGCAACAUCAUCAUCA 3'  
::::::::::::::::::::::::::  
query 3' AAGACGUUGUAGUAGUAGUAGU 5'  
query=miR5658, target=R03G\_13859, score=0, range=3267-3288, stran

```

target 5' UUCUGCAACAUCAUCAUCA 3'
::::::::::::::::::::::::::
query 3' AAGACGUUGUAGUAGUAGUAGU 5'
query=miR5658, target=R03G_02235, score=0, range=2826-2847, stran
target 5' UUCUGCAACAUCAUCAUCA 3'
::::::::::::::::::::::::::
query 3' AAGACGUUGUAGUAGUAGUAGU 5'
query=miR5658, target=R03G_13152, score=0, range=3483-3504, stran
target 5' UUCUGCAACAUCAUCAUCA 3'
::::::::::::::::::::::::::
query 3' AAGACGUUGUAGUAGUAGUAGU 5'
query=miR5658, target=R03G_12193, score=0, range=489-510, strand=
target 5' UUCUGCAACAUCAUCAUCA 3'
::::::::::::::::::::::::::
query 3' AAGACGUUGUAGUAGUAGUAGU 5'
query=miR5658, target=R03G_03990, score=0, range=240-261, strand=
target 5' UUCUGCAACAUCAUCAUCA 3'
::::::::::::::::::::::::::
query 3' AAGACGUUGUAGUAGUAGUAGU 5'
query=miR5658, target=R03G_10467, score=2, range=180-201, strand=
target 5' UUCUUCAUCAUCAUCAUCA 3'
:::: :: ::::::::::::::::::::
query 3' AAGACGUUGUAGUAGUAGUAGU 5'
query=miR5658, target=R03G_15427, score=2, range=633-654, strand=
target 5' UUCUUCAUCAUCAUCAUCA 3'
:::: :: ::::::::::::::::::::
query 3' AAGACGUUGUAGUAGUAGUAGU 5'
query=miR5658, target=R03G_14198, score=2.5, range=29-50, strand=
target 5' UUUACCAACAUCAUCAUCA 3'
::: ::::::::::::::::::::
query 3' AAGACGUUGUAGUAGUAGUAGU 5'
query=miR5658, target=R03G_16068, score=2.5, range=1575-1596,
strand=-1
target 5' UUCUCAAUAUCAUCGUCAUCA 3'
:::: ::::::::::::::::::::
query 3' AAGACGUUGUAGUAGUAGUAGU 5'
query=miR5658, target=R03G_16449, score=2.5, range=381-402, stran
target 5' UUCGGCAGCAUUAUCAUCAUCA 3'
::: ::::::::::::::::::::
query 3' AAGACGUUGUAGUAGUAGUAGU 5'
query=miR5658, target=R03G_03951, score=2.5, range=675-696, stran
target 5' UUCUCAAUAUCAUCAUCAUCA 3'
:::: :: ::::::::::::::::::::
query 3' AAGACGUUGUAGUAGUAGUAGU 5'
query=miR5658, target=R03G_15960, score=3, range=1604-1625, stran

```

target 5' AACAGCAACAUCAUCAUCA 3'  
: ::::::::::::::::::::  
query 3' AAGACGUUGUAGUAGUAGUAGU 5'  
query=miR5658, target=R03G\_16962, score=3, range=389-410, strand=  
target 5' UUGUCCAUCAUCAUCAUCA 3'  
:: : :: ::::::::::::::::::::  
query 3' AAGACGUUGUAGUAGUAGUAGU 5'  
query=miR5658, target=R03G\_14668, score=3, range=3063-3084, stran  
target 5' UUCUACAUCAUCAUCGUCAUCA 3'  
:::: : :: ::::::::::::::::::::  
query 3' AAGACGUUGUAGUAGUAGUAGU 5'  
query=miR5658, target=R03G\_03214, score=3, range=810-831, strand=  
target 5' UUCUUCAUCGUCAUCAUCAUCA 3'  
:::: : :: ::::::::::::::::::::  
query 3' AAGACGUUGUAGUAGUAGUAGU 5'  
query=miR5658, target=R03G\_08049, score=3, range=474-495, strand=  
target 5' UUCUUCAUCAUCAUCAUCGUCA 3'  
:::: : :: ::::::::::::::::::::  
query 3' AAGACGUUGUAGUAGUAGUAGU 5'  
query=miR5658, target=R03G\_11363, score=3, range=981-1002, strand  
target 5' UUCAUAGCAUCAUCAUCAUCA 3'  
::: . ::::::::::::::::::::  
query 3' AAGACGUUGUAGUAGUAGUAGU 5'  
query=miR5658, target=R03G\_02468, score=3, range=102-123, strand=  
target 5' UUCUUCAAGAUCGUCAUCAUCA 3'  
:::: : :: ::::::::::::::::::::  
query 3' AAGACGUUGUAGUAGUAGUAGU 5'  
query=miR5658, target=R03G\_06266, score=3, range=1425-1446, stran  
target 5' UUCUUCAUCAUCAUCAUCAUCU 3'  
:::: : :: ::::::::::::::::::::  
query 3' AAGACGUUGUAGUAGUAGUAGU 5'  
query=miR5658, target=R03G\_13668, score=3, range=216-237, strand=  
target 5' AUCAGCAUCAUCAUCAUCAUCA 3'  
:: : :: ::::::::::::::::::::  
query 3' AAGACGUUGUAGUAGUAGUAGU 5'  
query=miR5658, target=R03G\_00068, score=3, range=933-954, strand=  
target 5' UUCAUCAUCAUCAUCAUCAUCA 3'  
::: : :: ::::::::::::::::::::  
query 3' AAGACGUUGUAGUAGUAGUAGU 5'  
query=miR5658, target=R03G\_05239, score=3, range=102-122, strand=  
target 5' UUAU-CAUCAUCAUCAUCAUCA 3'  
:: : :: ::::::::::::::::::::  
query 3' AAGACGUUGUAGUAGUAGUAGU 5'  
query=miR5658, target=R03G\_01410, score=3.5, range=438-459, stran  
target 5' AUCUUUAUCAUCAUCAUCAUCA 3'



::: .: :::::::::::::::  
query 3' AAGACGUUGUAGUAGUAGUAGU 5'  
query=miR5658, target=R03G\_12605, score=3.5, range=111-132, stran  
target 5' UUCUUUAGCAUUAUCAUCAUCG 3'  
:::: .: :::::::::::::::  
query 3' AAGACGUUGUAGUAGUAGUAGU 5'  
query=miR5658, target=R03G\_14141, score=3.5, range=528-549, stran  
target 5' AUGUGUAACAUAUCAUCAUCA 3'  
: :::::::::::::::  
query 3' AAGACGUUGUAGUAGUAGUAGU 5'  
query=miR5658, target=R03G\_06694, score=3.5, range=645-666, stran  
target 5' UUUUGCAUCAUCAUCACCAUCA 3'  
::::: ::::::::::: ::::::  
query 3' AAGACGUUGUAGUAGUAGUAGU 5'  
query=miR5658, target=R03G\_14413, score=3.5, range=1110-1131,  
strand=-1  
target 5' UUCUUCAUCAUCGUCAUCAUCG 3'  
:::: :: :::::::::::::::  
query 3' AAGACGUUGUAGUAGUAGUAGU 5'  
query=miR5658, target=R03G\_16322, score=3.5, range=1824-1845,  
strand=-1  
target 5' UUCAUGAUUCAUCAUCAUCA 3'  
::: .: :::::::::::::::  
query 3' AAGACGUUGUAGUAGUAGUAGU 5'  
query=miR5658, target=R03G\_12515, score=3.5, range=189-210, stran  
target 5' CUCUCAAUAUCAUCAUCAUCC 3'  
::: :::::::::::::::  
query 3' AAGACGUUGUAGUAGUAGUAGU 5'  
query=miR5658, target=R03G\_04817, score=3.5, range=2901-2922,  
strand=-1  
target 5' UUCGUCAGCAUCAUCAUCAUCU 3'  
::: :::::::::::::::  
query 3' AAGACGUUGUAGUAGUAGUAGU 5'  
query=miR5658, target=R03G\_14543, score=3.5, range=1563-1584,  
strand=-1  
target 5' CUCUUUAUCAUCAUCAUCAUCA 3'  
::: .: :::::::::::::::  
query 3' AAGACGUUGUAGUAGUAGUAGU 5'  
query=miR5658, target=R03G\_13781, score=3.5, range=210-232, stran  
target 5' AUUUGUCAUCAUCAUCAUCAUCA 3'  
:::: :: :::::::::::::::  
query 3' AAGAC-GUUGUAGUAGUAGUAGU 5'  
query=miR5658, target=R03G\_03274, score=3.5, range=840-860, stran  
target 5' AUCU-CAUCAUCAUCAUCAUCG 3'  
::: :: :::::::::::::::

query 3' AAGACGUUGUAGUAGUAGUAGU 5'  
query=miR5658, target=R03G\_08260, score=3.5, range=330-350, stran  
target 5' UCCUGU-UCAUCAUCAUCAUCA 3'  
: :::: : :::::  
query 3' AAGACGUUGUAGUAGUAGUAGU 5'  
query=miR5658, target=R03G\_16243, score=3.5, range=1164-1184,  
strand=-1  
target 5' AUUUGCAA-AUCAUCAUUAUCA 3'  
: ::::: : :::::  
query 3' AAGACGUUGUAGUAGUAGUAGU 5'  
query=miR5658, target=R03G\_07768, score=4, range=861-881, strand=  
target 5' UUCU-CAAAAUCAUUAUCAUUA 3'  
: :::: : :::  
query 3' AAGACGUUGUAGUAGUAGUAGU 5'  
query=miR5658, target=R03G\_06536, score=4, range=395-416, strand=  
target 5' AACAAACAUCAUCAUCAUCA 3'  
: : ::::: : :::  
query 3' AAGACGUUGUAGUAGUAGUAGU 5'  
query=miR5658, target=R03G\_07545, score=4, range=444-465, strand=  
target 5' ACCUGCUCCAUCAUCAUCAUCA 3'  
: :::: : :::::  
query 3' AAGACGUUGUAGUAGUAGUAGU 5'  
query=miR5658, target=R03G\_09577, score=4, range=261-282, strand=  
target 5' CGCUGAAUCAUCAUCAUCAUCA 3'  
: :: : : ::::: : :::  
query 3' AAGACGUUGUAGUAGUAGUAGU 5'  
query=miR5658, target=R03G\_03075, score=4, range=1070-1091, stran  
target 5' AUCAUCACCAUCAUCAUCAUCA 3'  
: :: : : : ::::: : :::  
query 3' AAGACGUUGUAGUAGUAGUAGU 5'  
query=miR5658, target=R03G\_03827, score=4, range=1064-1085, stran  
target 5' AUCAUCAUCAUCAUCAUCAUCA 3'  
: :: : : : ::::: : :::  
query 3' AAGACGUUGUAGUAGUAGUAGU 5'  
query=miR5658, target=R03G\_13341, score=4, range=606-626, strand=  
target 5' AUCUUC-ACGUCAUCAUCAUCA 3'  
: :: : : : ::::: : :::  
query 3' AAGACGUUGUAGUAGUAGUAGU 5'  
query=miR5658, target=R03G\_00729, score=4, range=1058-1079, stran  
target 5' AUCAUCAUCAUCAUCAUCAUCA 3'  
: :: : : : ::::: : :::  
query 3' AAGACGUUGUAGUAGUAGUAGU 5'  
query=miR5658, target=R03G\_03011, score=4, range=380-401, strand=  
target 5' GUCGUCAUCAUCAUCAUCAUCA 3'  
: :: : : : ::::: : :::

query 3' AAGACGUUGUAGUAGUAGUAGU 5'  
query=miR5658, target=R03G\_06138, score=4, range=612-634, strand=  
target 5' AUCAGCAUCUAUCAUCAUCA 3'  
:: ::: : :::::::::::::::  
query 3' AAGACGUUG-UAGUAGUAGUAGU 5'  
query=miR5658, target=R03G\_00266, score=4, range=1206-1226, stran  
target 5' CCCU-CAUCAUCAUCAUCA 3'  
:: :: :::::::::::::::  
query 3' AAGACGUUGUAGUAGUAGUAGU 5'  
query=miR5658, target=R03G\_09516, score=4, range=242-262, strand=  
target 5' UUAU-UAUUAUCAUCAUCA 3'  
:: : .. :::::::::::::::  
query 3' AAGACGUUGUAGUAGUAGUAGU 5'  
query=miR5658, target=R03G\_09649, score=4, range=586-606, strand=  
target 5' CUUUGUAA-AUCAUCAUCAUCC 3'  
:.....: :::::::::::::::  
query 3' AAGACGUUGUAGUAGUAGUAGU 5'  
query=miR5658, target=R03G\_14098, score=4, range=1632-1653, stran  
target 5' UUCUGCAACGUCAUCUUCAUCU 3'  
:.....:.....: :::::::  
query 3' AAGACGUUGUAGUAGUAGUAGU 5'  
query=miR5658, target=R03G\_06174, score=4, range=1053-1074, stran  
target 5' UUCUGCAUCGUCAUCGUCAUCC 3'  
:.....: :.....: :::::::  
query 3' AAGACGUUGUAGUAGUAGUAGU 5'  
query=miR5658, target=R03G\_14654, score=4, range=543-564, strand=  
target 5' AUCUGCAACAUCAUUAAGCAUCA 3'  
:.....:.....: :.....: :::::::  
query 3' AAGACGUUGUAGUAGUAGUAGU 5'  
query=miR5658, target=R03G\_15062, score=4, range=420-441, strand=  
target 5' UUCUUCUACAUAUUCGUCAUCA 3'  
:.... : :.....:.....: :::::::  
query 3' AAGACGUUGUAGUAGUAGUAGU 5'  
query=miR5658, target=R03G\_17136, score=4, range=909-930, strand=  
target 5' UUGUGAGAUAUCAUCAUUAUCA 3'  
:: :: :.....:.....: :::::::  
query 3' AAGACGUUGUAGUAGUAGUAGU 5'  
query=miR5658, target=R03G\_04521, score=4, range=186-207, strand=  
target 5' AACUGCAUCGUCAUCAUCAUCA 3'  
:.....: :.....: :::::::  
query 3' AAGACGUUGUAGUAGUAGUAGU 5'  
query=miR5658, target=R03G\_17058, score=4, range=402-423, strand=  
target 5' UUUGGUAUCAUCAUCAUUA 3'  
:.. :.. :.....:.....: :  
query 3' AAGACGUUGUAGUAGUAGUAGU 5'

query=miR5658, target=R03G\_05224, score=4, range=477-498, strand=  
target 5' UUCAACAGCAUCAUCGUCAUCG 3'  
::: :::::::::::::::::::::  
query 3' AAGACGUUGUAGUAGUAGUAGU 5'  
query=miR5658, target=R03G\_10411, score=4, range=3885-3906, stran  
target 5' CUCUUCAUCAUCAUCAUCGUCA 3'  
::: :: :::::::::::::::::::::  
query 3' AAGACGUUGUAGUAGUAGUAGU 5'  
query=miR5658, target=R03G\_12721, score=4, range=1383-1404, stran  
target 5' AUUUUCGUCAUCAUCAUCAUCA 3'  
::: :: :::::::::::::::::::::  
query 3' AAGACGUUGUAGUAGUAGUAGU 5'  
query=miR5658, target=R03G\_02346, score=4, range=1554-1575, stran  
target 5' UUCUUCUACAUCAUCAUCAUUC 3'  
:::: : :::::::::::::::::::::  
query 3' AAGACGUUGUAGUAGUAGUAGU 5'  
query=miR5658, target=R03G\_07465, score=4, range=1080-1101, stran  
target 5' GUCGGCAUCAUCGUCAUCAUCA 3'  
:: ::: :::::::::::::::::::::  
query 3' AAGACGUUGUAGUAGUAGUAGU 5'  
query=miR5658, target=R03G\_04437, score=4, range=66-87, strand=-1  
target 5' UUCUUCAACAUCUUCAUCAUCC 3'  
:::: :::::::::: :::::::::::  
query 3' AAGACGUUGUAGUAGUAGUAGU 5'  
query=miR5658, target=R03G\_11688, score=4, range=1029-1050, stran  
target 5' CUCUUCGUUAUCAUCAUCAUCA 3'  
::: :: :::::::::::::::::::::  
query 3' AAGACGUUGUAGUAGUAGUAGU 5'  
query=miR5658, target=R03G\_09578, score=4, range=2882-2902, stran  
target 5' UUCU-UGACAUCAUCAUCAUGA 3'  
:::: ..:::::::::::::::::: :  
query 3' AAGACGUUGUAGUAGUAGUAGU 5'  
query=miR5658, target=R03G\_06187, score=4, range=423-444, strand=  
target 5' UUCUUCAUCAUCAUCAUCGUCU 3'  
:::: :: :::::::::::::::::::::  
query 3' AAGACGUUGUAGUAGUAGUAGU 5'  
query=miR5658, target=R03G\_10170, score=4, range=3336-3356, stran  
target 5' UUUUUUAA-AUCAUCGUCAUCA 3'  
:::: ::: :::::::::::::::::::::  
query 3' AAGACGUUGUAGUAGUAGUAGU 5'  
query=miR5658, target=R03G\_10853, score=4, range=138-158, strand=  
target 5' UUUUG-AAUAUCUUCAUCAUCA 3'  
::::: ::::::: :::::::::::::::  
query 3' AAGACGUUGUAGUAGUAGUAGU 5'  
query=miR5658, target=R03G\_05884, score=4, range=2109-2131, stran

target 5' UGCUGUCAUCAUCAUCGUCAUCA 3'  
: ::: :: :  
query 3' AAGAC-GUUGUAGUAGUAGUAGU 5'  
query=miR5658, target=R03G\_08246, score=4, range=207-227, strand=  
target 5' UUC-GUAUCAUCAUCAUUG 3'  
::: :: :  
query 3' AAGACGUUGUAGUAGUAGUAGU 5'  
query=miR5658, target=R03G\_10143, score=4, range=252-273, strand=  
target 5' UUCUUUGCAUCAUCAUCAUCC 3'  
:::: . :  
query 3' AAGACGUUGUAGUAGUAGUAGU 5'  
query=miR5658, target=R03G\_02328, score=4, range=540-561, strand=  
target 5' UUCUUCAUCAUCUUCAUCAUCA 3'  
:::: :: :  
query 3' AAGACGUUGUAGUAGUAGUAGU 5'  
query=miR5658, target=R03G\_10942, score=4, range=456-477, strand=  
target 5' UCCUCAUCAUCAUCGUCAUCA 3'  
::: :: :  
query 3' AAGACGUUGUAGUAGUAGUAGU 5'  
query=miR5658, target=R03G\_16404, score=4, range=1539-1560, stran  
target 5' AUCACCAUCAUCAUCAUCAUCA 3'  
:: :: :  
query 3' AAGACGUUGUAGUAGUAGUAGU 5'  
query=miR5658, target=R03G\_03908, score=4, range=2556-2577, stran  
target 5' UUCUUCUUCAUCAUCAUCAUCU 3'  
:::: : :  
query 3' AAGACGUUGUAGUAGUAGUAGU 5'  
query=miR5658, target=R03G\_15942, score=4, range=177-198, strand=  
target 5' GUCUACUUCAUCAUCAUCAUCA 3'  
::: : :  
query 3' AAGACGUUGUAGUAGUAGUAGU 5'  
query=miR5658, target=R03G\_15993, score=4, range=723-744, strand=  
target 5' GUCAUCAUCAUCAUCAUCAUCA 3'  
:: :: :  
query 3' AAGACGUUGUAGUAGUAGUAGU 5'  
query=miR5658, target=R03G\_09445, score=4, range=513-534, strand=  
target 5' AUCAUCAUCAUCAUCAUCAUCA 3'  
:: :: :  
query 3' AAGACGUUGUAGUAGUAGUAGU 5'  
query=miR5658, target=R03G\_01836, score=4, range=243-264, strand=  
target 5' AUCAUCAUCAUCAUCAUCAUCA 3'  
:: :: :  
query 3' AAGACGUUGUAGUAGUAGUAGU 5'  
query=miR5658, target=R03G\_04948, score=4, range=426-447, strand=  
target 5' GUCCUCAUCAUCAUCAUCAUCA 3'

```
:: :: :::::::::::::::
query 3' AAGACGUUGUAGUAGUAGUAGU 5'
query=miR5658, target=R03G_00749, score=4, range=972-994, strand=
target 5' CUCUGUAAUAUCUAUCAUCA 3'
::::::::::: :::::::::::
query 3' AAGACGUUGUAG-UAGUAGUAGU 5'
query=miR5658, target=R03G_03069, score=4, range=900-921, strand=
target 5' UUAUCCUCAUCAUCAUCA 3'
:: : : :::::::::::::::
query 3' AAGACGUUGUAGUAGUAGUAGU 5'
query=miR5658, target=R03G_05036, score=4, range=789-810, strand=
target 5' UUAUACUUCAUCAUCAUCA 3'
:: : : :::::::::::::::
query 3' AAGACGUUGUAGUAGUAGUAGU 5'
query=miR5658, target=R03G_10266, score=4, range=726-747, strand=
target 5' UUAUUCAUAAUCAUCAUCA 3'
:: : :: :::::::::::::::
query 3' AAGACGUUGUAGUAGUAGUAGU 5'
query=miR5658, target=R03G_13923, score=4, range=228-248, strand=
target 5' UUAU-UAUUAUCAUCAUCA 3'
:: : .: .:::::::::::::
query 3' AAGACGUUGUAGUAGUAGUAGU 5'
query=miR5658, target=R03G_01085, score=4, range=945-965, strand=
target 5' AUCUGUAA-AUCAUCAUUAUCG 3'
::::: : :::::::::::::::
query 3' AAGACGUUGUAGUAGUAGUAGU 5'
query=miR5658, target=R03G_02346, score=4, range=1734-1755, stran
target 5' UUCUUCUACAUCAUCAUCAUUC 3'
:::: : :::::::::::::::
query 3' AAGACGUUGUAGUAGUAGUAGU 5'
query=miR5658, target=R03G_04948, score=4, range=393-414, strand=
target 5' AUCAUCACCAUCAUCAUCA 3'
:: :: :::::::::::::::
query 3' AAGACGUUGUAGUAGUAGUAGU 5'
query=miR5658, target=R03G_02346, score=4, range=2379-2400, stran
target 5' UUCUUCUACAUCAUCAUCAUUC 3'
:::: : :::::::::::::::
query 3' AAGACGUUGUAGUAGUAGUAGU 5'
query=miR8034, target=R03G_08042, score=0, range=1280-1300, stran
target 5' AGUUUGUGCAGGCUUGUCAUA 3'
::::::::::::: :::::::::::
query 3' UCAAACACGUCCGAACAGUAU 5'
query=miR8034, target=R03G_07976, score=1, range=1745-1765, stran
target 5' AGUUUGUACAGGCUUGUCAUA 3'
::::: : :::::::::::::::
```









query 3' GGAGUUGCUUCGCUAGAU 5'  
query=miR5506, target=R03G\_12964, score=0, range=660-677, strand=  
target 5' CCUCAACGAAGCGAUCUA 3'

query 3' GGAGUUGCUUCGCUAGAU 5'  
query=miR5506, target=R03G\_11952, score=0, range=1038-1055, stran  
target 5' CCUCAACGAAGCGAUCUA 3'

query 3' GGAGUUGCUUCGCUAGAU 5'  
query=miR5506, target=R03G\_12669, score=0, range=660-677, strand=  
target 5' CCUCAACGAAGCGAUCUA 3'

query 3' GGAGUUGCUUCGCUAGAU 5'  
query=miR5506, target=R03G\_16708, score=0, range=660-677, strand=  
target 5' CCUCAACGAAGCGAUCUA 3'

query 3' GGAGUUGCUUCGCUAGAU 5'  
query=miR5506, target=R03G\_12075, score=0, range=660-677, strand=  
target 5' CCUCAACGAAGCGAUCUA 3'

query 3' GGAGUUGCUUCGCUAGAU 5'  
query=miR5506, target=R03G\_05925, score=0.5, range=660-677, stran  
target 5' UCUCAACGAAGCGAUCUA 3'

query 3' GGAGUUGCUUCGCUAGAU 5'  
query=miR5506, target=R03G\_12961, score=0.5, range=993-1010, stra  
target 5' UCUCAACGAAGCGAUCUA 3'

query 3' GGAGUUGCUUCGCUAGAU 5'  
query=miR5506, target=R03G\_05927, score=0.5, range=660-677, stran  
target 5' UCUCAACGAAGCGAUCUA 3'

query 3' GGAGUUGCUUCGCUAGAU 5'  
query=miR5506, target=R03G\_09927, score=1, range=660-677, strand=  
target 5' CCUCAACGAGGCGAUCUA 3'

query 3' GGAGUUGCUUCGCUAGAU 5'  
query=miR5506, target=R03G\_09951, score=2.5, range=918-935, stran  
target 5' UCUGAAUGAAGCGAUCUA 3'

query 3' GGAGUUGCUUCGCUAGAU 5'  
query=miR5506, target=R03G\_00927, score=3, range=608-625, strand=  
target 5' UUUCAAGGAAGCGAUCUA 3'

query 3' GGAGUUGCUUCGCUAGAU 5'  
query=miR5506, target=R03G\_08754, score=3, range=5278-5295, stran  
target 5' GCUGAACGAAGUGAUCUA 3'  
:: ::::::::::::::::::::  
query 3' GGAGUUGCUUCGCUAGAU 5'  
query=miR5506, target=R03G\_02524, score=3, range=244-260, strand=  
target 5' CCUC-ACGAAGCCAUCUA 3'  
:::: :::::::::: ::::::  
query 3' GGAGUUGCUUCGCUAGAU 5'  
query=miR5506, target=R03G\_07756, score=3.5, range=309-326, stran  
target 5' UCUUGACCAAGCGAUCUA 3'  
.....: ::::::::::::::::::::  
query 3' GGAGUUGCUUCGCUAGAU 5'  
query=miR5506, target=R03G\_16652, score=4, range=181-199, strand=  
target 5' CUUCAACGAAGUGAUGCUG 3'  
:.....: :::::::::::::::::::: :.  
query 3' GGAGUUGCUUCGCUA-GAU 5'  
query=miR5506, target=R03G\_13173, score=4, range=1310-1328, stran  
target 5' CCUCAGACGAAGUGAUCCA 3'  
:.....: :::::::::::::::::::: :  
query 3' GGAGU-UGCUUCGCUAGAU 5'  
query=miR5506, target=R03G\_02307, score=4, range=696-713, strand=  
target 5' CCUGAACGAAGCGAUCGC 3'  
::: ::::::::::::::::::::  
query 3' GGAGUUGCUUCGCUAGAU 5'  
query=miR5506, target=R03G\_07404, score=4, range=883-899, strand=  
target 5' CCUCAACGAAG-GAUUUC 3'  
:.....: ::::::::::::::::::::  
query 3' GGAGUUGCUUCGCUAGAU 5'  
query=miR5506, target=R03G\_12345, score=4, range=241-257, strand=  
target 5' CAUC-GCGAAGCGAUCUU 3'  
: ::: ..::::::::::::::::::  
query 3' GGAGUUGCUUCGCUAGAU 5'  
query=miR5506, target=R03G\_12484, score=4, range=3550-3568, stran  
target 5' GCUCAACGAAGACGAUCUC 3'  
:.....: ::::::::::::::::::::  
query 3' GGAGUUGCUUC-GCUAGAU 5'  
query=miR5506, target=R03G\_02322, score=4, range=1604-1621, stran  
target 5' CCUCAGCAAAGUGAUCUA 3'  
:.....: ::::::::::::::::::::  
query 3' GGAGUUGCUUCGCUAGAU 5'  
query=miR5506, target=R03G\_11393, score=4, range=254-271, strand=  
target 5' CCUUGACGAAUUGAUCUA 3'  
:.....: ..::::::::::::::::::  
query 3' GGAGUUGCUUCGCUAGAU 5'

query=miR5506, target=R03G\_09594, score=4, range=262-279, strand=  
target 5' CUUGAAUGGAGCGAUCUG 3'  
::: :::::::::::::::  
query 3' GGAGUUGCUUCGCUAGAU 5'  
query=miR5506, target=R03G\_15771, score=4, range=254-271, strand=  
target 5' CCUUGACGAAGCAAUCUU 3'  
::::: ::::::::::: :::::  
query 3' GGAGUUGCUUCGCUAGAU 5'  
query=miR9752, target=R03G\_02835, score=0, range=239-261, strand=  
target 5' AAAUCAUGGAACAGCAAGAAGCA 3'  
::::: ::::::::::: :::::::::::  
query 3' UUUAGUACCUUGUCGUUCUUCGU 5'  
query=miR9752, target=R03G\_07109, score=0, range=239-261, strand=  
target 5' AAAUCAUGGAACAGCAAGAAGCA 3'  
::::: ::::::::::: :::::::::::  
query 3' UUUAGUACCUUGUCGUUCUUCGU 5'  
query=miR9752, target=R03G\_07672, score=0, range=239-261, strand=  
target 5' AAAUCAUGGAACAGCAAGAAGCA 3'  
::::: ::::::::::: :::::::::::  
query 3' UUUAGUACCUUGUCGUUCUUCGU 5'  
query=miR9752, target=R03G\_09934, score=0, range=239-261, strand=  
target 5' AAAUCAUGGAACAGCAAGAAGCA 3'  
::::: ::::::::::: :::::::::::  
query 3' UUUAGUACCUUGUCGUUCUUCGU 5'  
query=miR9752, target=R03G\_09197, score=0, range=239-261, strand=  
target 5' AAAUCAUGGAACAGCAAGAAGCA 3'  
::::: ::::::::::: :::::::::::  
query 3' UUUAGUACCUUGUCGUUCUUCGU 5'  
query=miR9752, target=R03G\_15283, score=0, range=239-261, strand=  
target 5' AAAUCAUGGAACAGCAAGAAGCA 3'  
::::: ::::::::::: :::::::::::  
query 3' UUUAGUACCUUGUCGUUCUUCGU 5'  
query=miR9752, target=R03G\_10526, score=0, range=239-261, strand=  
target 5' AAAUCAUGGAACAGCAAGAAGCA 3'  
::::: ::::::::::: :::::::::::  
query 3' UUUAGUACCUUGUCGUUCUUCGU 5'  
query=miR9752, target=R03G\_01312, score=0, range=20-42, strand=1  
target 5' AAAUCAUGGAACAGCAAGAAGCA 3'  
::::: ::::::::::: :::::::::::  
query 3' UUUAGUACCUUGUCGUUCUUCGU 5'  
query=miR9752, target=R03G\_01935, score=0, range=239-261, strand=  
target 5' AAAUCAUGGAACAGCAAGAAGCA 3'  
::::: ::::::::::: :::::::::::  
query 3' UUUAGUACCUUGUCGUUCUUCGU 5'  
query=miR9752, target=R03G\_04795, score=3.5, range=289-312, stran



query 3' UACCUAGGAGGAAAAGAACU 5'  
query=miR5369, target=R03G\_14704, score=0, range=639-660, strand=  
target 5' AUGGACAUCUCCUUUUUCUUGA 3'

query 3' UACCUAGGAGGAAAAGAACU 5'  
query=miR5369, target=R03G\_12979, score=0, range=639-660, strand=  
target 5' AUGGACAUCUCCUUUUUCUUGA 3'

query 3' UACCUAGGAGGAAAAGAACU 5'  
query=miR5369, target=R03G\_10555, score=0, range=639-660, strand=  
target 5' AUGGACAUCUCCUUUUUCUUGA 3'

query 3' UACCUAGGAGGAAAAGAACU 5'  
query=miR5369, target=R03G\_05280, score=0, range=639-660, strand=  
target 5' AUGGACAUCUCCUUUUUCUUGA 3'

query 3' UACCUAGGAGGAAAAGAACU 5'  
query=miR5369, target=R03G\_16686, score=0, range=639-660, strand=  
target 5' AUGGACAUCUCCUUUUUCUUGA 3'

query 3' UACCUAGGAGGAAAAGAACU 5'  
query=miR5369, target=R03G\_07305, score=0, range=639-660, strand=  
target 5' AUGGACAUCUCCUUUUUCUUGA 3'

query 3' UACCUAGGAGGAAAAGAACU 5'  
query=miR5369, target=R03G\_03103, score=0, range=639-660, strand=  
target 5' AUGGACAUCUCCUUUUUCUUGA 3'

query 3' UACCUAGGAGGAAAAGAACU 5'  
query=miR5369, target=R03G\_12087, score=0, range=639-660, strand=  
target 5' AUGGACAUCUCCUUUUUCUUGA 3'

query 3' UACCUAGGAGGAAAAGAACU 5'  
query=miR5369, target=R03G\_08612, score=0, range=639-660, strand=  
target 5' AUGGACAUCUCCUUUUUCUUGA 3'

query 3' UACCUAGGAGGAAAAGAACU 5'  
query=miR5369, target=R03G\_05630, score=0, range=639-660, strand=  
target 5' AUGGACAUCUCCUUUUUCUUGA 3'

query 3' UACCUAGGAGGAAAAGAACU 5'  
query=miR5369, target=R03G\_13450, score=0, range=594-615, strand=  
target 5' AUGGACAUCUCCUUUUUCUUGA 3'



query=miR5369, target=R03G\_09088, score=4, range=243-263, strand=  
target 5' AUCGA-AUCCUCCUUUUUCUUA 3'  
:: :: :::::::::::::: ::  
query 3' UACCUGUAGGAGGAAAAGAACU 5'  
query=miR5369, target=R03G\_16312, score=4, range=1137-1157, stran  
target 5' AAGUACAU-CUUCUUUUUCUUGA 3'  
: : :::: ::::::::::::::  
query 3' UACCUGUAGGAGGAAAAGAACU 5'  
query=miR5369, target=R03G\_13188, score=4, range=60-81, strand=-1  
target 5' AUCGACACCUUUCUUUUUCUUGA 3'  
:: :::: ::::::::::::::  
query 3' UACCUGUAGGAGGAAAAGAACU 5'  
query=miR5369, target=R03G\_09005, score=4, range=759-780, strand=  
target 5' AUUUACAUCUCUUUUUCUUGC 3'  
:: ::::::::::::::  
query 3' UACCUGUAGGAGGAAAAGAACU 5'  
query=miR5369, target=R03G\_07455, score=4, range=90-111, strand=-  
target 5' UUUGACACCUUCCUUUUUCUUGA 3'  
: :::: ::::::::::::::  
query 3' UACCUGUAGGAGGAAAAGAACU 5'  
query=miR5369, target=R03G\_13619, score=4, range=153-174, strand=  
target 5' UUGCUCGUCCUCCUUUUUCUUGG 3'  
:: ::::::::::::::  
query 3' UACCUGUAGGAGGAAAAGAACU 5'  
query=miR1072, target=R03G\_15574, score=0, range=1404-1425, stran  
target 5' CCAAGCUCAAUAACAACAAUA 3'  
: ::::::::::::::  
query 3' GGUUCGAGUUUAUUGUUGUUAU 5'  
query=miR1072, target=R03G\_01425, score=2, range=1389-1410, stran  
target 5' UCAAGUUCAGUAACAACAAUA 3'  
. ::::::::::::::  
query 3' GGUUCGAGUUUAUUGUUGUUAU 5'  
query=miR1072, target=R03G\_13806, score=2, range=1389-1410, stran  
target 5' UCAAGUUCAGUAACAACAAUA 3'  
. ::::::::::::::  
query 3' GGUUCGAGUUUAUUGUUGUUAU 5'  
query=miR1072, target=R03G\_16566, score=2, range=1389-1410, stran  
target 5' UCAAGUUCAGUAACAACAAUA 3'  
. ::::::::::::::  
query 3' GGUUCGAGUUUAUUGUUGUUAU 5'  
query=miR1072, target=R03G\_03120, score=2, range=1389-1410, stran  
target 5' UCAAGUUCAGUAACAACAAUA 3'  
. ::::::::::::::  
query 3' GGUUCGAGUUUAUUGUUGUUAU 5'  
query=miR1072, target=R03G\_14533, score=2, range=1194-1215, stran



target 5' UCAAGUUCAGAUACAACAAUA 3'  
.....  
query 3' GGUUCGAGUUUAUUGUUGUUAU 5'  
query=miR1072, target=R03G\_03093, score=2.5, range=415-435, stran  
target 5' CGAAG-UCAAUAACAACAAUG 3'  
: ::: .....  
query 3' GGUUCGAGUUUAUUGUUGUUAU 5'  
query=miR1072, target=R03G\_15852, score=3.5, range=582-604, stran  
target 5' UCAUAGUUCGAAUAACAGCAAUA 3'  
... ..  
query 3' GGU-UCGAGUUUAUUGUUGUUAU 5'  
query=miR1072, target=R03G\_12258, score=4, range=540-562, strand=  
target 5' UCAACCUCAAAGUAACAACAAUG 3'  
.... : .....  
query 3' GGUUCGAGUUU-AUUGUUGUUAU 5'  
query=miR1072, target=R03G\_14612, score=4, range=49-70, strand=1  
target 5' CCCGGCACAAUAACAUAUAUG 3'  
:: ... ..  
query 3' GGUUCGAGUUUAUUGUUGUUAU 5'  
query=miR1072, target=R03G\_11195, score=4, range=1304-1324, stran  
target 5' UUAAGC-CAAUAACAAAAUA 3'  
..... : .....  
query 3' GGUUCGAGUUUAUUGUUGUUAU 5'  
query=miR1072, target=R03G\_16217, score=4, range=462-483, strand=  
target 5' CUGUGAUCCAUAACAACAAUA 3'  
... : :: .....  
query 3' GGUUCGAGUUUAUUGUUGUUAU 5'  
query=miR1072, target=R03G\_10289, score=4, range=948-968, strand=  
target 5' CCAGGCUCUAUAA-AACAAUG 3'  
..... : .....  
query 3' GGUUCGAGUUUAUUGUUGUUAU 5'  
query=miR2105, target=R03G\_07019, score=2, range=124-144, strand=  
target 5' GUCAGCC-UUCACAAAUCACAA 3'  
..... : .....  
query 3' UAGUUGGUAAGUGUUUAGUGUU 5'  
query=miR2105, target=R03G\_01808, score=3.5, range=2231-2252,  
strand=-1  
target 5' AGCAACCGAUCACAAAUACAA 3'  
: ..... : .....  
query 3' UAGUUGGUAAGUGUUUAGUGUU 5'  
query=miR2105, target=R03G\_13442, score=4, range=600-621, strand=  
target 5' AAGAACCGUUCACAAGUCACAG 3'  
: ..... : .....  
query 3' UAGUUGGUAAGUGUUUAGUGUU 5'  
query=miR2105, target=R03G\_13216, score=4, range=216-237, strand=

target 5' AAGAACCGUUCACAAGUCACAG 3'  
: .....  
query 3' UAGUUGGUAAGUGUUUAGUGUU 5'  
query=miR2105, target=R03G\_15621, score=4, range=85-105, strand=1  
target 5' GUUCAUU-UUCACAAAUCACAA 3'  
. . . . .  
query 3' UAGUUGGUAAGUGUUUAGUGUU 5'  
query=miR2105, target=R03G\_00180, score=4, range=2255-2277, stran  
target 5' AUCAGACUGUUCAUGAAUCACAA 3'  
: : : : :  
query 3' UAGU-UGGUAAGUGUUUAGUGUU 5'  
query=miR2105, target=R03G\_01213, score=4, range=98-118, strand=-  
target 5' AUAAACCA-UGACAAAUCACAA 3'  
: : : : : : : : : : :  
query 3' UAGUUGGUAAGUGUUUAGUGUU 5'  
query=miR2863b, target=R03G\_02990, score=3.5, range=6877-6896,  
strand=1  
target 5' GCAUCU-GCUUCAAUAGACA 3'  
. : : : : : : : : : : :  
query 3' UGUAGAUCGAGGUUUUUUUUGU 5'  
query=miR2863b, target=R03G\_12848, score=4, range=652-671, strand  
target 5' ACA-CUGGAUCCAAAUAACG 3'  
: : : : : : : : : : :  
query 3' UGUAGAUCGAGGUUUUUUUUGU 5'  
query=miR2863b, target=R03G\_14461, score=4, range=90-110, strand=  
target 5' GGAUCUGGCUUCAAUAAGCA 3'  
. : : : : : : : : : : :  
query 3' UGUAGAUCGAGGUUUUUUUUGU 5'  
query=miR2863b, target=R03G\_15597, score=4, range=1323-1343, stra  
target 5' ACAUCGAAUCCAAAUAAC 3'  
: : : : : : : : : : :  
query 3' UGUAGAUCGAGGUUUUUUUUGU 5'  
query=miR1090, target=R03G\_03575, score=0, range=2909-2931, stran  
target 5' GUUUGAUUGUAGUAUGGCUUUCA 3'  
: : : : : : : : : : :  
query 3' CAAACUAACAUCAUACCGAAAGU 5'  
query=miR1090, target=R03G\_12067, score=0, range=2909-2931, stran  
target 5' GUUUGAUUGUAGUAUGGCUUUCA 3'  
: : : : : : : : : : :  
query 3' CAAACUAACAUCAUACCGAAAGU 5'  
query=miR1090, target=R03G\_13855, score=0, range=2909-2931, stran  
target 5' GUUUGAUUGUAGUAUGGCUUUCA 3'  
: : : : : : : : : : :  
query 3' CAAACUAACAUCAUACCGAAAGU 5'  
query=miR1090, target=R03G\_13701, score=0, range=2909-2931, stran



```
..... : : :
query 3' UGGUUAGUUCUGAUGUAGUAGU 5'
query=miR9760, target=R03G_12520, score=4, range=1440-1461, stran
target 5' AGAGAUCAAGGACUACAUCGUCA 3'
: .....
query 3' UGGUUAGUUCUGAUGUAGUAGU 5'
query=miR9760, target=R03G_00797, score=4, range=1440-1461, stran
target 5' AGAGAUCAAGGACUACAUCGUCA 3'
: .....
query 3' UGGUUAGUUCUGAUGUAGUAGU 5'
query=miR9565-5p, target=R03G_17446, score=0, range=1355-1374,
strand=-1
target 5' AGAGAAACGAGCAGAACGGA 3'
.....
query 3' UCUCUUUGCUCGUCUUGCCU 5'
query=miR9565-5p, target=R03G_01733, score=0, range=1355-1374,
strand=-1
target 5' AGAGAAACGAGCAGAACGGA 3'
.....
query 3' UCUCUUUGCUCGUCUUGCCU 5'
query=miR9565-5p, target=R03G_02966, score=0, range=626-645, stra
target 5' AGAGAAACGAGCAGAACGGA 3'
.....
query 3' UCUCUUUGCUCGUCUUGCCU 5'
query=miR9565-5p, target=R03G_02708, score=0, range=1088-1107,
strand=-1
target 5' AGAGAAACGAGCAGAACGGA 3'
.....
query 3' UCUCUUUGCUCGUCUUGCCU 5'
query=miR9565-5p, target=R03G_06502, score=0, range=1355-1374,
strand=-1
target 5' AGAGAAACGAGCAGAACGGA 3'
.....
query 3' UCUCUUUGCUCGUCUUGCCU 5'
query=miR9565-5p, target=R03G_10420, score=0, range=1355-1374,
strand=-1
target 5' AGAGAAACGAGCAGAACGGA 3'
.....
query 3' UCUCUUUGCUCGUCUUGCCU 5'
query=miR9565-5p, target=R03G_04662, score=0, range=1097-1116,
strand=-1
target 5' AGAGAAACGAGCAGAACGGA 3'
.....
query 3' UCUCUUUGCUCGUCUUGCCU 5'
query=miR9565-5p, target=R03G_10991, score=0, range=1355-1374,
```



strand=-1  
target 5' AGAGCGACGAGCAGAACGAGA 3'  
:::: .::::: ::  
query 3' UCUCUUUGCUCGUCUUGC-CU 5'  
query=miR9565-5p, target=R03G\_17255, score=3.5, range=2881-2901,  
strand=-1  
target 5' AGAGCGACGAGCAGAACGAGA 3'  
:::: .::::: ::  
query 3' UCUCUUUGCUCGUCUUGC-CU 5'  
query=miR9565-5p, target=R03G\_07735, score=3.5, range=2830-2850,  
strand=-1  
target 5' AGAGCGACGAGCAGAACGAGA 3'  
:::: .::::: ::  
query 3' UCUCUUUGCUCGUCUUGC-CU 5'  
query=miR9565-5p, target=R03G\_10543, score=3.5, range=2383-2403,  
strand=-1  
target 5' AGAGCGACGAGCAGAACGAGA 3'  
:::: .::::: ::  
query 3' UCUCUUUGCUCGUCUUGC-CU 5'  
query=miR9565-5p, target=R03G\_10745, score=3.5, range=1897-1917,  
strand=-1  
target 5' AGAGCGACGAGCAGAACGAGA 3'  
:::: .::::: ::  
query 3' UCUCUUUGCUCGUCUUGC-CU 5'  
query=miR9565-5p, target=R03G\_17156, score=3.5, range=1183-1203,  
strand=-1  
target 5' AGAGCGACGAGCAGAACGAGA 3'  
:::: .::::: ::  
query 3' UCUCUUUGCUCGUCUUGC-CU 5'  
query=miR9565-5p, target=R03G\_16919, score=3.5, range=505-525,  
strand=-1  
target 5' AGAGCGACGAGCAGAACGAGA 3'  
:::: .::::: ::  
query 3' UCUCUUUGCUCGUCUUGC-CU 5'  
query=miR9565-5p, target=R03G\_14563, score=3.5, range=493-513,  
strand=-1  
target 5' AGAGCGACGAGCAGAACGAGA 3'  
:::: .::::: ::  
query 3' UCUCUUUGCUCGUCUUGC-CU 5'  
query=miR9565-5p, target=R03G\_01936, score=4, range=1370-1389,  
strand=-1  
target 5' AGCCAGGCGAGCGGAACGGA 3'  
:: :.::::: ::  
query 3' UCUCUUUGCUCGUCUUGCCU 5'  
query=miR9565-5p, target=R03G\_10142, score=4, range=2625-2643,







strand=-1  
target 5' AAUAGACAAAGGAAGACAUCA 3'  
: ::. :::::::::::::::  
query 3' UCAUUGGUUUCCUUCUGUAGU 5'  
query=miR169f-3p, target=R03G\_17385, score=2.5, range=2102-2122,  
strand=-1  
target 5' AAUAGACAAAGGAAGACAUCA 3'  
: ::. :::::::::::::::  
query 3' UCAUUGGUUUCCUUCUGUAGU 5'  
query=miR169f-3p, target=R03G\_17358, score=2.5, range=2102-2122,  
strand=-1  
target 5' AAUAGACAAAGGAAGACAUCA 3'  
: ::. :::::::::::::::  
query 3' UCAUUGGUUUCCUUCUGUAGU 5'  
query=miR169f-3p, target=R03G\_12169, score=2.5, range=2102-2122,  
strand=-1  
target 5' AAUAGACAAAGGAAGACAUCA 3'  
: ::. :::::::::::::::  
query 3' UCAUUGGUUUCCUUCUGUAGU 5'  
query=miR169f-3p, target=R03G\_11771, score=2.5, range=2102-2122,  
strand=-1  
target 5' AAUAGACAAAGGAAGACAUCA 3'  
: ::. :::::::::::::::  
query 3' UCAUUGGUUUCCUUCUGUAGU 5'  
query=miR169f-3p, target=R03G\_14710, score=2.5, range=2102-2122,  
strand=-1  
target 5' AAUAGACAAAGGAAGACAUCA 3'  
: ::. :::::::::::::::  
query 3' UCAUUGGUUUCCUUCUGUAGU 5'  
query=miR169f-3p, target=R03G\_07976, score=2.5, range=2099-2119,  
strand=-1  
target 5' AAUAGACAAAGGAAGACAUCA 3'  
: ::. :::::::::::::::  
query 3' UCAUUGGUUUCCUUCUGUAGU 5'  
query=miR169f-3p, target=R03G\_10725, score=2.5, range=2066-2086,  
strand=-1  
target 5' AAUAGACAAAGGAAGACAUCA 3'  
: ::. :::::::::::::::  
query 3' UCAUUGGUUUCCUUCUGUAGU 5'  
query=miR169f-3p, target=R03G\_06430, score=2.5, range=2066-2086,  
strand=-1  
target 5' AAUAGACAAAGGAAGACAUCA 3'  
: ::. :::::::::::::::  
query 3' UCAUUGGUUUCCUUCUGUAGU 5'  
query=miR169f-3p, target=R03G\_01309, score=2.5, range=2051-2071,

strand=-1  
target 5' AAUAGACAAAGGAAGACAUCA 3'  
: ::. :::::::::::::::  
query 3' UCAUUGGUUUCCUUCUGUAGU 5'  
query=miR169f-3p, target=R03G\_01207, score=2.5, range=1919-1939,  
strand=-1  
target 5' AAUAGACAAAGGAAGACAUCA 3'  
: ::. :::::::::::::::  
query 3' UCAUUGGUUUCCUUCUGUAGU 5'  
query=miR169f-3p, target=R03G\_17441, score=2.5, range=1829-1849,  
strand=-1  
target 5' AAUAGACAAAGGAAGACAUCA 3'  
: ::. :::::::::::::::  
query 3' UCAUUGGUUUCCUUCUGUAGU 5'  
query=miR169f-3p, target=R03G\_13747, score=2.5, range=2102-2122,  
strand=-1  
target 5' AAUAGACAAAGGAAGACAUCA 3'  
: ::. :::::::::::::::  
query 3' UCAUUGGUUUCCUUCUGUAGU 5'  
query=miR169f-3p, target=R03G\_07294, score=2.5, range=1703-1723,  
strand=-1  
target 5' AAUAGACAAAGGAAGACAUCA 3'  
: ::. :::::::::::::::  
query 3' UCAUUGGUUUCCUUCUGUAGU 5'  
query=miR169f-3p, target=R03G\_01954, score=2.5, range=1052-1072,  
strand=-1  
target 5' AAUAGACAAAGGAAGACAUCA 3'  
: ::. :::::::::::::::  
query 3' UCAUUGGUUUCCUUCUGUAGU 5'  
query=miR169f-3p, target=R03G\_03552, score=2.5, range=236-256,  
strand=-1  
target 5' AAUAGACAAAGGAAGACAUCA 3'  
: ::. :::::::::::::::  
query 3' UCAUUGGUUUCCUUCUGUAGU 5'  
query=miR169f-3p, target=R03G\_07128, score=2.5, range=620-640,  
strand=-1  
target 5' AAUAGACAAAGGAAGACAUCA 3'  
: ::. :::::::::::::::  
query 3' UCAUUGGUUUCCUUCUGUAGU 5'  
query=miR169f-3p, target=R03G\_06605, score=3, range=425-444, stra  
target 5' AGUAA-CAAAGGCAGACAUCA 3'  
: ::. :::::::::::::::  
query 3' UCAUUGGUUUCCUUCUGUAGU 5'  
query=miR169f-3p, target=R03G\_05462, score=4, range=973-994, stra  
target 5' CGUAACUGUAAGGGAGACAUCA 3'



query 3' CUACUACUUCUUCACCGCGU 5'  
query=miR6144, target=R03G\_00241, score=0, range=1119-1138, stran  
target 5' GAUGAUGAAGAAGUGGCGCA 3'

query 3' CUACUACUUCUUCACCGCGU 5'  
query=miR6144, target=R03G\_00296, score=0, range=1119-1138, stran  
target 5' GAUGAUGAAGAAGUGGCGCA 3'

query 3' CUACUACUUCUUCACCGCGU 5'  
query=miR6144, target=R03G\_14347, score=0, range=2925-2944, stran  
target 5' GAUGAUGAAGAAGUGGCGCA 3'

query 3' CUACUACUUCUUCACCGCGU 5'  
query=miR6144, target=R03G\_01964, score=0, range=1305-1324, stran  
target 5' GAUGAUGAAGAAGUGGCGCA 3'

query 3' CUACUACUUCUUCACCGCGU 5'  
query=miR6144, target=R03G\_12527, score=0, range=2994-3013, stran  
target 5' GAUGAUGAAGAAGUGGCGCA 3'

query 3' CUACUACUUCUUCACCGCGU 5'  
query=miR6144, target=R03G\_16693, score=0, range=2994-3013, stran  
target 5' GAUGAUGAAGAAGUGGCGCA 3'

query 3' CUACUACUUCUUCACCGCGU 5'  
query=miR6144, target=R03G\_13918, score=0, range=2994-3013, stran  
target 5' GAUGAUGAAGAAGUGGCGCA 3'

query 3' CUACUACUUCUUCACCGCGU 5'  
query=miR6144, target=R03G\_12673, score=0, range=2130-2149, stran  
target 5' GAUGAUGAAGAAGUGGCGCA 3'

query 3' CUACUACUUCUUCACCGCGU 5'  
query=miR6144, target=R03G\_01614, score=0, range=2835-2854, stran  
target 5' GAUGAUGAAGAAGUGGCGCA 3'

query 3' CUACUACUUCUUCACCGCGU 5'  
query=miR6144, target=R03G\_10804, score=0, range=2835-2854, stran  
target 5' GAUGAUGAAGAAGUGGCGCA 3'

query 3' CUACUACUUCUUCACCGCGU 5'  
query=miR6144, target=R03G\_07311, score=0, range=2835-2854, stran  
target 5' GAUGAUGAAGAAGUGGCGCA 3'

query 3' CUACUACUUCUUCACCGCGU 5'  
query=miR6144, target=R03G\_12538, score=0, range=2886-2905, stran  
target 5' GAUGAUGAAGAAGUGGCGCA 3'  
.....  
query 3' CUACUACUUCUUCACCGCGU 5'  
query=miR6144, target=R03G\_16539, score=0, range=2886-2905, stran  
target 5' GAUGAUGAAGAAGUGGCGCA 3'  
.....  
query 3' CUACUACUUCUUCACCGCGU 5'  
query=miR6144, target=R03G\_12532, score=0, range=2835-2854, stran  
target 5' GAUGAUGAAGAAGUGGCGCA 3'  
.....  
query 3' CUACUACUUCUUCACCGCGU 5'  
query=miR6144, target=R03G\_17422, score=0, range=2130-2149, stran  
target 5' GAUGAUGAAGAAGUGGCGCA 3'  
.....  
query 3' CUACUACUUCUUCACCGCGU 5'  
query=miR6144, target=R03G\_05515, score=0, range=1824-1843, stran  
target 5' GAUGAUGAAGAAGUGGCGCA 3'  
.....  
query 3' CUACUACUUCUUCACCGCGU 5'  
query=miR6144, target=R03G\_04126, score=0, range=2988-3007, stran  
target 5' GAUGAUGAAGAAGUGGCGCA 3'  
.....  
query 3' CUACUACUUCUUCACCGCGU 5'  
query=miR6144, target=R03G\_03769, score=0, range=759-778, strand=  
target 5' GAUGAUGAAGAAGUGGCGCA 3'  
.....  
query 3' CUACUACUUCUUCACCGCGU 5'  
query=miR6144, target=R03G\_16361, score=0, range=2829-2848, stran  
target 5' GAUGAUGAAGAAGUGGCGCA 3'  
.....  
query 3' CUACUACUUCUUCACCGCGU 5'  
query=miR6144, target=R03G\_09547, score=0, range=2829-2848, stran  
target 5' GAUGAUGAAGAAGUGGCGCA 3'  
.....  
query 3' CUACUACUUCUUCACCGCGU 5'  
query=miR6144, target=R03G\_06425, score=0, range=2829-2848, stran  
target 5' GAUGAUGAAGAAGUGGCGCA 3'  
.....  
query 3' CUACUACUUCUUCACCGCGU 5'  
query=miR6144, target=R03G\_04933, score=0, range=2829-2848, stran  
target 5' GAUGAUGAAGAAGUGGCGCA 3'  
.....  
query 3' CUACUACUUCUUCACCGCGU 5'









target 5' UUG-AACAGAGAUGACAACA 3'  
::: :: :::::::::::::::  
query 3' AAUGUUUUCUCUACUGUUGU 5'  
query=miR394a-3p, target=R03G\_01624, score=3.5, range=863-882,  
strand=1  
target 5' GUACAAGUGAGAUGACAACA 3'  
: : : :::::::::::::::  
query 3' AAUGUUUUCUCUACUGUUGU 5'  
query=miR394a-3p, target=R03G\_03967, score=3.5, range=1040-1059,  
strand=1  
target 5' UGAAGAAAGAGGUGACAACA 3'  
: : . :::::::::::::::  
query 3' AAUGUUUUCUCUACUGUUGU 5'  
query=miR394a-3p, target=R03G\_12023, score=3.5, range=2-22, stran  
target 5' UGCAGAAAGAGAUGACGACA 3'  
: . :: :::::::::::::::  
query 3' AAUGU-UUUCUCUACUGUUGU 5'  
query=miR394a-3p, target=R03G\_04896, score=3.5, range=2208-2226,  
strand=1  
target 5' GUACAAGAGAGAUGA-AACA 3'  
: : : : : :::::::::::::::  
query 3' AAUGUUUUCUCUACUGUUGU 5'  
query=miR394a-3p, target=R03G\_13557, score=3.5, range=974-993,  
strand=-1  
target 5' UGGUAAGAGAGAUGAUAACA 3'  
: . . . . . :::::::::::::::  
query 3' AAUGUUUUCUCUACUGUUGU 5'  
query=miR394a-3p, target=R03G\_16787, score=4, range=261-280, stra  
target 5' UUACACAGGAGAUGAUGACA 3'  
: : : : : . . . . . :::::::::::::::  
query 3' AAUGUUUUCUCUACUGUUGU 5'  
query=miR394a-3p, target=R03G\_12626, score=4, range=720-739, stra  
target 5' UGACAAAGUAGAUGACAACA 3'  
: : : : : . . . . . :::::::::::::::  
query 3' AAUGUUUUCUCUACUGUUGU 5'  
query=miR394a-3p, target=R03G\_05768, score=4, range=135-154, stra  
target 5' UUACUAUAGGGAUGAUAACA 3'  
: : : : : : . . . . . :::::::::::::::  
query 3' AAUGUUUUCUCUACUGUUGU 5'  
query=miR394a-3p, target=R03G\_12883, score=4, range=176-194, stra  
target 5' ACACAAAAGAGAUGAC-ACA 3'  
: : : : : . . . . . :::::::::::::::  
query 3' AAUGUUUUCUCUACUGUUGU 5'  
query=miR394a-3p, target=R03G\_06457, score=4, range=439-459, stra  
target 5' UUGCAAAGAGAUGAGCGACG 3'

```
..... :....
query 3' AAUGUUUUCUCUACU-GUUGU 5'
query=miR394a-3p, target=R03G_03160, score=4, range=300-320, stra
target 5' UUAUAGAUAGAGGUGACAACU 3'
..... :.....
query 3' AAUGUUU-UCUCUACUGUUGU 5'
query=miR394a-3p, target=R03G_10070, score=4, range=362-381, stra
target 5' UGGCGUAAGGGAUGACAACA 3'
: .. :.....
query 3' AAUGUUUUCUCUACUGUUGU 5'
query=miR394a-3p, target=R03G_11485, score=4, range=362-381, stra
target 5' UGGCGUAAGGGAUGACAACA 3'
: .. :.....
query 3' AAUGUUUUCUCUACUGUUGU 5'
query=miR394a-3p, target=R03G_10359, score=4, range=362-381, stra
target 5' UGGCGUAAGGGAUGACAACA 3'
: .. :.....
query 3' AAUGUUUUCUCUACUGUUGU 5'
query=miR394a-3p, target=R03G_17191, score=4, range=362-381, stra
target 5' UGGCGUAAGGGAUGACAACA 3'
: .. :.....
query 3' AAUGUUUUCUCUACUGUUGU 5'
query=miR394a-3p, target=R03G_06230, score=4, range=13977-13995,
strand=-1
target 5' UUA-AAAGGAGAUGACCACA 3'
... :..... :...
query 3' AAUGUUUUCUCUACUGUUGU 5'
query=miR414, target=R03G_12063, score=0, range=1104-1125, strand
target 5' UGACGAUAUGAAGAAGAUGGUA 3'
..... :.....
query 3' ACUGCUAUACUUCUUCUACCAU 5'
query=miR414, target=R03G_04206, score=0, range=657-678, strand=1
target 5' UGACGAUAUGAAGAAGAUGGUA 3'
..... :.....
query 3' ACUGCUAUACUUCUUCUACCAU 5'
query=miR414, target=R03G_07712, score=0, range=108-129, strand=1
target 5' UGACGAUAUGAAGAAGAUGGUA 3'
..... :.....
query 3' ACUGCUAUACUUCUUCUACCAU 5'
query=miR414, target=R03G_12187, score=0.5, range=1608-1629, stra
target 5' UGAUGAUAUGAAGAAGAUGGUA 3'
..... :.....
query 3' ACUGCUAUACUUCUUCUACCAU 5'
query=miR414, target=R03G_11395, score=3, range=108-129, strand=1
target 5' UGAAGAUAUGAAGACGAUGGUA 3'
```

```

::: ::::::::::: :::::::::::
query 3' ACUGCUAUACUUCUUCUACCAU 5'
query=miR414, target=R03G_02287, score=3.5, range=1829-1849, stra
target 5' UUUUGAU-UGAAGAAGAUGGUA 3'
: .::: :::::::::::
query 3' ACUGCUAUACUUCUUCUACCAU 5'
query=miR414, target=R03G_14053, score=3.5, range=922-944, strand
target 5' UGCUGAUUUGAAGAGGAUGGUA 3'
:: .::: :::::::::::
query 3' ACUGCUAU-ACUUCUUCUACCAU 5'
query=miR414, target=R03G_12494, score=4, range=894-916, strand=1
target 5' UGAUGAAGAUGAAGGAGAUGGUG 3'
::::: : :::::::::::
query 3' ACUGC-UAUACUUCUUCUACCAU 5'
query=miR414, target=R03G_01516, score=4, range=2539-2560, strand
target 5' CGACGAAAAGAGGAAGAUGGUA 3'
::::: : :::::::::::
query 3' ACUGCUAUACUUCUUCUACCAU 5'
query=miR414, target=R03G_15731, score=4, range=39-60, strand=1
target 5' UGACGAGAUGAAAAAGAUGGUU 3'
::::: : :::::::::::
query 3' ACUGCUAUACUUCUUCUACCAU 5'
query=miR414, target=R03G_03476, score=4, range=66-87, strand=1
target 5' UGUUGAAAAGAAGAAGAUGGUG 3'
:: .: : :::::::::::
query 3' ACUGCUAUACUUCUUCUACCAU 5'
query=miR414, target=R03G_02379, score=4, range=3894-3916, strand
target 5' UGACGAUGUAGAAGAAGAUGAUG 3'
::::::::::: ::::::::::: :.
query 3' ACUGCUAUA-CUUCUUCUACCAU 5'
query=miR414, target=R03G_07465, score=4, range=158-180, strand=-
target 5' UGGAGUAUGAGAAGAAGAUGGUA 3'
:: . : ::. :::::::::::
query 3' ACUGC-UAUACUUCUUCUACCAU 5'
query=miR169d, target=R03G_02691, score=0, range=335-356, strand=
target 5' CCGGUAUUCUCAUCCUUGCUGA 3'
:::::::::::
query 3' GGCCAUUAGAGUAGGAACGAUU 5'
query=miR169d, target=R03G_17318, score=0, range=1802-1823, stran
target 5' CCGGUAUUCUCAUCCUUGCUGA 3'
:::::::::::
query 3' GGCCAUUAGAGUAGGAACGAUU 5'
query=miR169d, target=R03G_04118, score=0, range=1802-1823, stran
target 5' CCGGUAUUCUCAUCCUUGCUGA 3'
:::::::::::

```

query 3' GGCCAUUAGAGUAGGAACGAUU 5'  
query=miR169d, target=R03G\_16143, score=0, range=1799-1820, stran  
target 5' CCGGUAUUCUCAUCCUUGCUGAA 3'  
.....  
query 3' GGCCAUUAGAGUAGGAACGAUU 5'  
query=miR169d, target=R03G\_17274, score=0, range=1802-1823, stran  
target 5' CCGGUAUUCUCAUCCUUGCUGAA 3'  
.....  
query 3' GGCCAUUAGAGUAGGAACGAUU 5'  
query=miR169d, target=R03G\_12533, score=0, range=1142-1163, stran  
target 5' CCGGUAUUCUCAUCCUUGCUGAA 3'  
.....  
query 3' GGCCAUUAGAGUAGGAACGAUU 5'  
query=miR169d, target=R03G\_17329, score=0, range=1139-1160, stran  
target 5' CCGGUAUUCUCAUCCUUGCUGAA 3'  
.....  
query 3' GGCCAUUAGAGUAGGAACGAUU 5'  
query=miR169d, target=R03G\_07028, score=0, range=872-893, strand=  
target 5' CCGGUAUUCUCAUCCUUGCUGAA 3'  
.....  
query 3' GGCCAUUAGAGUAGGAACGAUU 5'  
query=miR169d, target=R03G\_15135, score=0, range=1802-1823, stran  
target 5' CCGGUAUUCUCAUCCUUGCUGAA 3'  
.....  
query 3' GGCCAUUAGAGUAGGAACGAUU 5'  
query=miR169d, target=R03G\_17384, score=0, range=1802-1823, stran  
target 5' CCGGUAUUCUCAUCCUUGCUGAA 3'  
.....  
query 3' GGCCAUUAGAGUAGGAACGAUU 5'  
query=miR169d, target=R03G\_06727, score=0, range=1940-1961, stran  
target 5' CCGGUAUUCUCAUCCUUGCUGAA 3'  
.....  
query 3' GGCCAUUAGAGUAGGAACGAUU 5'  
query=miR169d, target=R03G\_02999, score=4, range=3362-3383, stran  
target 5' UCUGUAAAAUCAUCCUUGCUGAG 3'  
. : : : : : : : : : : .  
query 3' GGCCAUUAGAGUAGGAACGAUU 5'  
query=miR5499, target=R03G\_07972, score=0, range=428-447, strand=  
target 5' UUCAACGAUCUCCUGUA 3'  
.....  
query 3' AAGGUUUGCUAGAAGGACAU 5'  
query=miR5499, target=R03G\_07991, score=0, range=428-447, strand=  
target 5' UUCAACGAUCUCCUGUA 3'  
.....  
query 3' AAGGUUUGCUAGAAGGACAU 5'

query=miR5499, target=R03G\_16015, score=3, range=950-969, strand=  
target 5' UUUCAAGUGGUCUCCUGUA 3'  
:~::~  
query 3' AAGGUUUGCUAGAAGGACAU 5'  
query=miR5499, target=R03G\_11387, score=3, range=2596-2615, stran  
target 5' UUACAAAUGAUCUUCUUGUA 3'  
:: ~::~  
query 3' AAGGUUUGCUAGAAGGACAU 5'  
query=miR5499, target=R03G\_12682, score=3.5, range=410-429, stran  
target 5' CAAUAAACGAUCUCCUGUA 3'  
.~::~  
query 3' AAGGUUUGCUAGAAGGACAU 5'  
query=miR5499, target=R03G\_08132, score=4, range=161-179, strand=  
target 5' UUCCCAACGAUUUCCU-UA 3'  
:~::~  
query 3' AAGGUUUGCUAGAAGGACAU 5'  
query=miR5679, target=R03G\_16392, score=0, range=942-961, strand=  
target 5' UCUAACUUCUUCUGCACCAA 3'  
:~::~  
query 3' AGAUUGAAGAAGACGUGGUU 5'  
query=miR5679, target=R03G\_08382, score=1.5, range=1059-1078, str  
target 5' UCCAGCUUCUUCUGCACCAA 3'  
:: ~::~  
query 3' AGAUUGAAGAAGACGUGGUU 5'  
query=miR5679, target=R03G\_17260, score=2, range=1972-1991, stran  
target 5' UCCAACUUCUUUUGCACCAA 3'  
:: ~::~  
query 3' AGAUUGAAGAAGACGUGGUU 5'  
query=miR5679, target=R03G\_15046, score=2.5, range=81-100, strand  
target 5' UCUUCCUUCUUCUGCACCA 3'  
:~::~  
query 3' AGAUUGAAGAAGACGUGGUU 5'  
query=miR5679, target=R03G\_15766, score=3, range=1717-1735, stran  
target 5' UCU-ACUUCUUCUGUACUAA 3'  
:~::~  
query 3' AGAUUGAAGAAGACGUGGUU 5'  
query=miR5679, target=R03G\_15382, score=3.5, range=563-582, stran  
target 5' UUUGGGUUCUUCUGCACCGA 3'  
:~::~  
query 3' AGAUUGAAGAAGACGUGGUU 5'  
query=miR5679, target=R03G\_16662, score=3.5, range=344-363, stran  
target 5' UUUGGGUUCUUCUGCACCGA 3'  
:~::~  
query 3' AGAUUGAAGAAGACGUGGUU 5'  
query=miR5679, target=R03G\_00611, score=3.5, range=4253-4272,

strand=-1  
target 5' UUGAACUUCUUCUGGACCAA 3'  
.. ::::::::::: :::::  
query 3' AGAUUGAAGAAGACGUGGUU 5'  
query=miR5679, target=R03G\_12393, score=3.5, range=167-186, stran  
target 5' UCUGCCUUCUUCUUCACCAA 3'  
:::: ::::::::::: :::::::  
query 3' AGAUUGAAGAAGACGUGGUU 5'  
query=miR5679, target=R03G\_01808, score=3.5, range=4676-4695,  
strand=-1  
target 5' UUCAGCAUCUUCUGCACCCAG 3'  
.. ::::: ::::::::::: ..  
query 3' AGAUUGAAGAAGACGUGGUU 5'  
query=miR5679, target=R03G\_06040, score=3.5, range=377-396, stran  
target 5' GCUGUCUUCUUCUGCACCCAC 3'  
::: ::::::::::: :::::::  
query 3' AGAUUGAAGAAGACGUGGUU 5'  
query=miR5679, target=R03G\_04287, score=4, range=489-508, strand=  
target 5' UCUGAGUUAUUCUGCACCCAG 3'  
::::: ::: ::::::::::: ..  
query 3' AGAUUGAAGAAGACGUGGUU 5'  
query=miR5679, target=R03G\_10076, score=4, range=634-652, strand=  
target 5' UCU-ACUUCUUCUGCCUCAA 3'  
::: ::::::::::: :::::::  
query 3' AGAUUGAAGAAGACGUGGUU 5'  
query=miR5679, target=R03G\_00105, score=4, range=6733-6751, stran  
target 5' UCCAA-UUCUUCUGCAUCAC 3'  
::: ::: ::::::::::: :::::::  
query 3' AGAUUGAAGAAGACGUGGUU 5'  
query=miR5679, target=R03G\_04826, score=4, range=502-521, strand=  
target 5' UUUAAUUUUUUGUGCACCAA 3'  
:.....: ::::::::::: :::::::  
query 3' AGAUUGAAGAAGACGUGGUU 5'  
query=miR5679, target=R03G\_12932, score=4, range=1367-1386, stran  
target 5' GUUACCUUCUUCUGUACCAG 3'  
.:~: ::::::::::: ..  
query 3' AGAUUGAAGAAGACGUGGUU 5'  
query=miR5679, target=R03G\_00509, score=4, range=1631-1650, stran  
target 5' UCUAAUUUUUUCUGCACCCA 3'  
:.....: ::::::::::: :  
query 3' AGAUUGAAGAAGACGUGGUU 5'  
query=miR5679, target=R03G\_12643, score=4, range=239-258, strand=  
target 5' UCUACCUUUUUCUUCACCAA 3'  
:.....: ::::::::::: :::::::  
query 3' AGAUUGAAGAAGACGUGGUU 5'



```

target 5' ACCCCUUGAUGAGCCACUUUCA 3'
::::::::::::::::::::::::::
query 3' UGGGGAACUACUCGGUGAAAGU 5'
query=miR161.1, target=R03G_03622, score=2, range=201-222, strand
target 5' ACCCCUUGAUGAACCCACUUUCA 3'
::::::::::::::::::::::::::
query 3' UGGGGAACUACUCGGUGAAAGU 5'
query=miR161.1, target=R03G_12187, score=2, range=378-399, strand
target 5' ACCCCUUGAUGAACCCACUUUCA 3'
::::::::::::::::::::::::::
query 3' UGGGGAACUACUCGGUGAAAGU 5'
query=miR161.1, target=R03G_14986, score=2, range=378-399, strand
target 5' ACCCCUUGAUGAACCCACUUUCA 3'
::::::::::::::::::::::::::
query 3' UGGGGAACUACUCGGUGAAAGU 5'
query=miR161.1, target=R03G_07714, score=2, range=201-222, strand
target 5' ACCCCUUGAUGAACCCACUUUCA 3'
::::::::::::::::::::::::::
query 3' UGGGGAACUACUCGGUGAAAGU 5'
query=miR161.1, target=R03G_05349, score=2, range=378-399, strand
target 5' ACCCCUUGAUGAACCCACUUUCA 3'
::::::::::::::::::::::::::
query 3' UGGGGAACUACUCGGUGAAAGU 5'
query=miR161.1, target=R03G_04693, score=2, range=378-399, strand
target 5' ACCCCUUGAUGAACCCACUUUCA 3'
::::::::::::::::::::::::::
query 3' UGGGGAACUACUCGGUGAAAGU 5'
query=miR161.1, target=R03G_03610, score=2, range=356-377, strand
target 5' ACCCCUUGAUGAACCCACUUUCA 3'
::::::::::::::::::::::::::
query 3' UGGGGAACUACUCGGUGAAAGU 5'
query=miR161.1, target=R03G_04209, score=2.5, range=306-327, stra
target 5' GCCCCUUGAUGAACCCACUUUCA 3'
.:::::::::::::::::::::::::::
query 3' UGGGGAACUACUCGGUGAAAGU 5'
query=miR161.1, target=R03G_03658, score=4, range=128-150, strand
target 5' UCUCUUGGUUGAGCCACUUUCU 3'
.:::::. :::::::::::::::::::
query 3' UGGGGAACU-ACUCGGUGAAAGU 5'
query=miR161.1, target=R03G_11575, score=4, range=689-710, strand
target 5' AUACCUUGGUGAGCCACUAUCA 3'
.: ::::::::::::::::::: :.
query 3' UGGGGAACUACUCGGUGAAAGU 5'
query=miR164b-3p, target=R03G_16322, score=3, range=984-1001,
strand=-1

```



target 5' GGAGGAGAAGCUGGGGGC 3'  
:: :::::::::::::: ::  
query 3' CCACCUCUUCGACCCGCG 5'  
query=miR164b-3p, target=R03G\_14084, score=3, range=1524-1540,  
strand=-1  
target 5' CGU-GAGAAGUUGGGCGC 3'  
:: :::::::::::::: ::  
query 3' CCACCUCUUCGACCCGCG 5'  
query=miR164b-3p, target=R03G\_08058, score=3.5, range=1028-1046,  
strand=-1  
target 5' GGUGUGAGAAGCUGGGCUU 3'  
:::: :::::::::::::: .  
query 3' CCAC-CUCUUCGACCCGCG 5'  
query=miR164b-3p, target=R03G\_00245, score=4, range=190-208, stra  
target 5' GUUGGAGGAGCUGGGGCGC 3'  
: :::::::::::::: ::::::::::  
query 3' CCACCUCUUCGA-CCCGCG 5'  
query=miR164b-3p, target=R03G\_07739, score=4, range=6-24, strand=  
target 5' GUUGGAGGAGCUGGAGCGC 3'  
: :::::::::::::: :::::  
query 3' CCACCUCUUCGACC-CGCG 5'  
query=miR164b-3p, target=R03G\_17278, score=4, range=190-208, stra  
target 5' GUUGGAGGAGCUGGGGCGC 3'  
: :::::::::::::: ::::::::::  
query 3' CCACCUCUUCGA-CCCGCG 5'  
query=miR164b-3p, target=R03G\_09937, score=4, range=190-208, stra  
target 5' GUUGGAGGAGCUGGGGCGC 3'  
: :::::::::::::: ::::::::::  
query 3' CCACCUCUUCGA-CCCGCG 5'  
query=miR164b-3p, target=R03G\_10795, score=4, range=255-273, stra  
target 5' GUUGGAGGAGCUUGGGGCGC 3'  
: :::::::::::::: ::::::::::  
query 3' CCACCUCUUCG-ACCCGCG 5'  
query=miR164b-3p, target=R03G\_05521, score=4, range=255-273, stra  
target 5' GUUGGAGGAGCUGGGGCGC 3'  
: :::::::::::::: ::::::::::  
query 3' CCACCUCUUCGA-CCCGCG 5'  
query=miR164b-3p, target=R03G\_10474, score=4, range=10-27, strand  
target 5' AGUGGAGAAGCUGGUUGCA 3'  
: :::::::::::::: ::  
query 3' CCACCUCUUCGACCCGCG 5'  
query=miR164b-3p, target=R03G\_14969, score=4, range=606-623, stra  
target 5' GGUGAAGAAGGUGGGCGG 3'  
:::: ::::: :::::  
query 3' CCACCUCUUCGACCCGCG 5'



query=miR5246, target=R03G\_09485, score=0, range=226-243, strand=  
target 5' AAGUCAAAAGCUGUCUCA 3'  
:::::::::::::::::::  
query 3' UUCAGUUUCGACAGAGUU 5'  
query=miR5246, target=R03G\_09942, score=0, range=226-243, strand=  
target 5' AAGUCAAAAGCUGUCUCA 3'  
:::::::::::::::::::  
query 3' UUCAGUUUCGACAGAGUU 5'  
query=miR5246, target=R03G\_12672, score=0, range=655-672, strand=  
target 5' AAGUCAAAAGCUGUCUCA 3'  
:::::::::::::::::::  
query 3' UUCAGUUUCGACAGAGUU 5'  
query=miR5246, target=R03G\_01738, score=0, range=781-798, strand=  
target 5' AAGUCAAAAGCUGUCUCA 3'  
:::::::::::::::::::  
query 3' UUCAGUUUCGACAGAGUU 5'  
query=miR5246, target=R03G\_13702, score=0, range=781-798, strand=  
target 5' AAGUCAAAAGCUGUCUCA 3'  
:::::::::::::::::::  
query 3' UUCAGUUUCGACAGAGUU 5'  
query=miR5246, target=R03G\_06719, score=0, range=781-798, strand=  
target 5' AAGUCAAAAGCUGUCUCA 3'  
:::::::::::::::::::  
query 3' UUCAGUUUCGACAGAGUU 5'  
query=miR5246, target=R03G\_05934, score=0, range=781-798, strand=  
target 5' AAGUCAAAAGCUGUCUCA 3'  
:::::::::::::::::::  
query 3' UUCAGUUUCGACAGAGUU 5'  
query=miR5246, target=R03G\_14972, score=0, range=781-798, strand=  
target 5' AAGUCAAAAGCUGUCUCA 3'  
:::::::::::::::::::  
query 3' UUCAGUUUCGACAGAGUU 5'  
query=miR5246, target=R03G\_06740, score=0, range=781-798, strand=  
target 5' AAGUCAAAAGCUGUCUCA 3'  
:::::::::::::::::::  
query 3' UUCAGUUUCGACAGAGUU 5'  
query=miR5246, target=R03G\_13000, score=0, range=781-798, strand=  
target 5' AAGUCAAAAGCUGUCUCA 3'  
:::::::::::::::::::  
query 3' UUCAGUUUCGACAGAGUU 5'  
query=miR5246, target=R03G\_00252, score=0, range=904-921, strand=  
target 5' AAGUCAAAAGCUGUCUCA 3'  
:::::::::::::::::::  
query 3' UUCAGUUUCGACAGAGUU 5'  
query=miR5246, target=R03G\_09598, score=0, range=781-798, strand=



query 3' UUCAGUUUCGACAGAGUU 5'  
query=miR5246, target=R03G\_07673, score=0, range=850-867, strand=  
target 5' AAGUCAAAAGCUGUCUCA 3'  
query 3' UUCAGUUUCGACAGAGUU 5'  
query=miR5246, target=R03G\_01938, score=0, range=850-867, strand=  
target 5' AAGUCAAAAGCUGUCUCA 3'  
query 3' UUCAGUUUCGACAGAGUU 5'  
query=miR5246, target=R03G\_12173, score=0, range=646-663, strand=  
target 5' AAGUCAAAAGCUGUCUCA 3'  
query 3' UUCAGUUUCGACAGAGUU 5'  
query=miR5246, target=R03G\_01710, score=0, range=238-255, strand=  
target 5' AAGUCAAAAGCUGUCUCA 3'  
query 3' UUCAGUUUCGACAGAGUU 5'  
query=miR5246, target=R03G\_08455, score=1.5, range=762-779, stran  
target 5' GAUUCAAAAGCUGUCUCA 3'  
query 3' UUCAGUUUCGACAGAGUU 5'  
query=miR5246, target=R03G\_16144, score=2, range=850-867, strand=  
target 5' AAGUCAAAAACUGUCUCA 3'  
query 3' UUCAGUUUCGACAGAGUU 5'  
query=miR5246, target=R03G\_09215, score=2, range=477-493, strand=  
target 5' AAG-CAAAGCUGUCUCGA 3'  
query 3' UUCAGUUUCGACAGAGUU 5'  
query=miR5246, target=R03G\_09763, score=3, range=628-645, strand=  
target 5' GAAUAAAAGCUGUUUCA 3'  
query 3' UUCAGUUUCGACAGAGUU 5'  
query=miR5246, target=R03G\_16293, score=3, range=1171-1188, stran  
target 5' AAUUCAAAAGCUGUCUGAA 3'  
query 3' UUCAGUUUCGACAGAGUU 5'  
query=miR5246, target=R03G\_06799, score=3, range=2959-2977, stran  
target 5' AUGUCAAAAGGCUGUCUCA 3'  
query 3' UUCAGUUU-CGACAGAGUU 5'  
query=miR5246, target=R03G\_01135, score=3, range=2618-2634, stran  
target 5' AAGGCAAAGCUG-CUCA 3'

query 3' UUCAGUUUCGACAGAGUU 5'  
query=miR5246, target=R03G\_00648, score=3, range=426-444, strand=  
target 5' AAGUCCAAGCAUGUCUCA 3'  
.....  
query 3' UUCAGUUUCG-ACAGAGUU 5'  
query=miR5246, target=R03G\_05035, score=3, range=1720-1738, stran  
target 5' AAGUCAAAAGUUGUUUCA 3'  
.....  
query 3' UUCAG-UUUCGACAGAGUU 5'  
query=miR5246, target=R03G\_10647, score=3, range=914-931, strand=  
target 5' UAGCCAAAGCUGUUUCA 3'  
:: .....  
query 3' UUCAGUUUCGACAGAGUU 5'  
query=miR5246, target=R03G\_07588, score=3.5, range=106-122, stran  
target 5' AAGUUGAAGCUGUC-CAA 3'  
.....  
query 3' UUCAGUUUCGACAGAGUU 5'  
query=miR5246, target=R03G\_05836, score=3.5, range=767-785, stran  
target 5' AAUUAAGCUGUCAUCA 3'  
:: .....  
query 3' UUCAGUUUCGACAG-AGUU 5'  
query=miR5246, target=R03G\_11399, score=3.5, range=830-847, stran  
target 5' AAAUUAAGCUGUCUUA 3'  
:: .....  
query 3' UUCAGUUUCGACAGAGUU 5'  
query=miR5246, target=R03G\_10474, score=3.5, range=1487-1503, str  
target 5' GAG-CAAAGCUGUCACAA 3'  
... .....  
query 3' UUCAGUUUCGACAGAGUU 5'  
query=miR5246, target=R03G\_01898, score=3.5, range=631-648, stran  
target 5' AGGCCAAAGUUGUCUCAU 3'  
... .....  
query 3' UUCAGUUUCGACAGAGUU 5'  
query=miR5246, target=R03G\_00739, score=3.5, range=793-810, stran  
target 5' AAGGUAAGCUGUUUCAU 3'  
... .....  
query 3' UUCAGUUUCGACAGAGUU 5'  
query=miR5246, target=R03G\_03011, score=3.5, range=587-604, stran  
target 5' AUGCUAAAGUUGUCUCA 3'  
: : .....  
query 3' UUCAGUUUCGACAGAGUU 5'  
query=miR5246, target=R03G\_15244, score=4, range=605-622, strand=  
target 5' AAGUCAAGCUGUAUUA 3'  
.....  
query 3' UUCAGUUUCGACAGAGUU 5'

query=miR5246, target=R03G\_07201, score=4, range=883-901, strand=  
target 5' AAGCUCAAAGCUGUUUUGA 3'  
:: :::::::::::::::  
query 3' UUC-AGUUUCGACAGAGUU 5'  
query=miR5246, target=R03G\_04477, score=4, range=3244-3261, stran  
target 5' AAGUCUCAGCUGUCUCAA 3'  
::: :::::::::::::::  
query 3' UUCAGUUUCGACAGAGUU 5'  
query=miR5246, target=R03G\_09560, score=4, range=239-257, strand=  
target 5' AAAUCAAGCUGUUUACAA 3'  
:: :::::::::::::::  
query 3' UUCAGUUUCGACAGA-GUU 5'  
query=miR5246, target=R03G\_16067, score=4, range=1127-1144, stran  
target 5' UAGUCA AUGCUGUCUCAU 3'  
::: :::::::::::::::  
query 3' UUCAGUUUCGACAGAGUU 5'  
query=miR5246, target=R03G\_08131, score=4, range=1066-1083, stran  
target 5' AAAUUAAAGCUCUCUCAG 3'  
:: :::::::::::::::  
query 3' UUCAGUUUCGACAGAGUU 5'  
query=miR5246, target=R03G\_04841, score=4, range=407-424, strand=  
target 5' AAGAAAAAGUUGUUUCA 3'  
::: :::::::::::::::  
query 3' UUCAGUUUCGACAGAGUU 5'  
query=miR5246, target=R03G\_03464, score=4, range=244-262, strand=  
target 5' AAUUUGAAGACUGUCUCAA 3'  
:: :::::::::::::::  
query 3' UUCAGUUUC-GACAGAGUU 5'  
query=miR5246, target=R03G\_09319, score=4, range=618-634, strand=  
target 5' UAGU-AAAGCUGUUUCA 3'  
::: :::::::::::::::  
query 3' UUCAGUUUCGACAGAGUU 5'  
query=miR5246, target=R03G\_02881, score=4, range=1352-1370, stran  
target 5' CAAUCGAGAGCUGUCUCAA 3'  
: :: :::::::::::::::  
query 3' UUCAG-UUUCGACAGAGUU 5'  
query=miR5246, target=R03G\_14233, score=4, range=1403-1419, stran  
target 5' AAG-CAAAGCUGGUUCA 3'  
::: :::::::::::::::  
query 3' UUCAGUUUCGACAGAGUU 5'  
query=miR5246, target=R03G\_10027, score=4, range=719-735, strand=  
target 5' AAGU-AAAGCUGUUUGAA 3'  
::: :::::::::::::::  
query 3' UUCAGUUUCGACAGAGUU 5'  
query=miR5246, target=R03G\_16871, score=4, range=220-236, strand=









query=miR2108a, target=R03G\_03790, score=0, range=590-610, strand  
target 5' CCCGACAAAAAGAACAAUUA 3'  
.....  
query 3' GGGCUGUUUUUCUUGUUAUU 5'  
query=miR2108a, target=R03G\_05274, score=0, range=590-610, strand  
target 5' CCCGACAAAAAGAACAAUUA 3'  
.....  
query 3' GGGCUGUUUUUCUUGUUAUU 5'  
query=miR2108a, target=R03G\_02841, score=0, range=590-610, strand  
target 5' CCCGACAAAAAGAACAAUUA 3'  
.....  
query 3' GGGCUGUUUUUCUUGUUAUU 5'  
query=miR2108a, target=R03G\_17439, score=0, range=590-610, strand  
target 5' CCCGACAAAAAGAACAAUUA 3'  
.....  
query 3' GGGCUGUUUUUCUUGUUAUU 5'  
query=miR2108a, target=R03G\_04805, score=0, range=590-610, strand  
target 5' CCCGACAAAAAGAACAAUUA 3'  
.....  
query 3' GGGCUGUUUUUCUUGUUAUU 5'  
query=miR2108a, target=R03G\_07310, score=0, range=149-169, strand  
target 5' CCCGACAAAAAGAACAAUUA 3'  
.....  
query 3' GGGCUGUUUUUCUUGUUAUU 5'  
query=miR2108a, target=R03G\_03890, score=3, range=67-88, strand=1  
target 5' UCCGAUGAAGAAGAACAAUUA 3'  
. . . . . : .....

query 3' GGGCUG-UUUUUCUUGUUAUU 5'  
query=miR2108a, target=R03G\_08514, score=3.5, range=530-550, stra  
target 5' AUGGGCAGAAAGAACAAUUA 3'  
. : .....

query 3' GGGCUGUUUUUCUUGUUAUU 5'  
query=miR2108a, target=R03G\_12322, score=3.5, range=69-88, strand  
target 5' UCUGG-AUAAAGAACAAUUA 3'  
. . . . . : .....

query 3' GGGCUGUUUUUCUUGUUAUU 5'  
query=miR2108a, target=R03G\_09721, score=3.5, range=11-30, strand  
target 5' UUUGAC-UAAAGAACAAUUA 3'  
. . . . . : .....

query 3' GGGCUGUUUUUCUUGUUAUU 5'  
query=miR2108a, target=R03G\_08463, score=4, range=1416-1435, stra  
target 5' UCCGA-AAAAGGAACAAUUGG 3'  
. . . . . : .....

query 3' GGGCUGUUUUUCUUGUUAUU 5'  
query=miR2108a, target=R03G\_02901, score=4, range=9-29, strand=1



query 3' CAUCUGAUGAUGUAGUGGUU 5'  
query=miR5015, target=R03G\_13217, score=0, range=1642-1661, stran  
target 5' GUAGACUACUACAUCACCAA 3'

query 3' CAUCUGAUGAUGUAGUGGUU 5'  
query=miR5015, target=R03G\_05640, score=0, range=1390-1409, stran  
target 5' GUAGACUACUACAUCACCAA 3'

query 3' CAUCUGAUGAUGUAGUGGUU 5'  
query=miR5015, target=R03G\_15268, score=0, range=1642-1661, stran  
target 5' GUAGACUACUACAUCACCAA 3'

query 3' CAUCUGAUGAUGUAGUGGUU 5'  
query=miR5015, target=R03G\_16797, score=0, range=643-662, strand=  
target 5' GUAGACUACUACAUCACCAA 3'

query 3' CAUCUGAUGAUGUAGUGGUU 5'  
query=miR5015, target=R03G\_13222, score=0, range=1636-1655, stran  
target 5' GUAGACUACUACAUCACCAA 3'

query 3' CAUCUGAUGAUGUAGUGGUU 5'  
query=miR5015, target=R03G\_14352, score=0, range=1642-1661, stran  
target 5' GUAGACUACUACAUCACCAA 3'

query 3' CAUCUGAUGAUGUAGUGGUU 5'  
query=miR5015, target=R03G\_10870, score=3.5, range=373-392, stran  
target 5' GUGGACAGCUAUAUCACCAA 3'

query 3' CAUCUGAUGAUGUAGUGGUU 5'  
query=miR5015, target=R03G\_15674, score=4, range=694-713, strand=  
target 5' GUCGACUACUUUAUCACCAA 3'

query 3' CAUCUGAUGAUGUAGUGGUU 5'  
query=miR5015, target=R03G\_07869, score=4, range=1588-1607, stran  
target 5' GUCGACUACUUUAUCACCAA 3'

query 3' CAUCUGAUGAUGUAGUGGUU 5'  
query=miR5015, target=R03G\_13865, score=4, range=1615-1634, stran  
target 5' GUCGACUACUUUAUCACCAA 3'

query 3' CAUCUGAUGAUGUAGUGGUU 5'  
query=miR5015, target=R03G\_10777, score=4, range=1519-1538, stran  
target 5' GUCGACUACUUUAUCACCAA 3'

```
query 3' CAUCUGAUGAUGUAGUGGUU 5'
query=miR5015, target=R03G_11278, score=4, range=1546-1565, stran
target 5' GUCGACUACUUUAUCACCAA 3'
:: :::::::::: ::::::::::
query 3' CAUCUGAUGAUGUAGUGGUU 5'
query=miR5015, target=R03G_14624, score=4, range=1531-1550, stran
target 5' GUCGACUACUUUAUCACCAA 3'
:: :::::::::: ::::::::::
query 3' CAUCUGAUGAUGUAGUGGUU 5'
query=miR5015, target=R03G_08609, score=4, range=328-347, strand=
target 5' GUCGACUACUUUAUCACCAA 3'
:: :::::::::: ::::::::::
query 3' CAUCUGAUGAUGUAGUGGUU 5'
query=miR5015, target=R03G_01720, score=4, range=328-347, strand=
target 5' GUCGACUACUUUAUCACCAA 3'
:: :::::::::: ::::::::::
query 3' CAUCUGAUGAUGUAGUGGUU 5'
query=miR5015, target=R03G_16171, score=4, range=11174-11192,
strand=-1
target 5' GUA-ACAGCUGCAUCACCAA 3'
::: :: ::::::::::::::
query 3' CAUCUGAUGAUGUAGUGGUU 5'
query=miR5015, target=R03G_01332, score=4, range=851-869, strand=
target 5' GUA-ACAGCUGCAUCACCAA 3'
::: :: ::::::::::::::
query 3' CAUCUGAUGAUGUAGUGGUU 5'
query=miR4227, target=R03G_14636, score=0, range=38-55, strand=1
target 5' UGAAAGAUUGGUACCAGA 3'
::::::::::::::::::::
query 3' ACUUUCUAACCAUGGUCU 5'
query=miR4227, target=R03G_13717, score=0, range=38-55, strand=1
target 5' UGAAAGAUUGGUACCAGA 3'
::::::::::::::::::::
query 3' ACUUUCUAACCAUGGUCU 5'
query=miR4227, target=R03G_12005, score=0, range=662-679, strand=
target 5' UGAAAGAUUGGUACCAGA 3'
::::::::::::::::::::
query 3' ACUUUCUAACCAUGGUCU 5'
query=miR4227, target=R03G_12080, score=0, range=245-262, strand=
target 5' UGAAAGAUUGGUACCAGA 3'
::::::::::::::::::::
query 3' ACUUUCUAACCAUGGUCU 5'
query=miR4227, target=R03G_11407, score=0, range=245-262, strand=
target 5' UGAAAGAUUGGUACCAGA 3'
::::::::::::::::::::
```

query 3' ACUUUCUAACCAUGGUCU 5'  
query=miR4227, target=R03G\_05928, score=0, range=434-451, strand=  
target 5' UGAAAGAUUGGUACCAGA 3'  
.....  
query 3' ACUUUCUAACCAUGGUCU 5'  
query=miR4227, target=R03G\_15157, score=0, range=662-679, strand=  
target 5' UGAAAGAUUGGUACCAGA 3'  
.....  
query 3' ACUUUCUAACCAUGGUCU 5'  
query=miR4227, target=R03G\_04676, score=1, range=662-679, strand=  
target 5' UGAAUGAUUGGUACCAGA 3'  
.... :.....  
query 3' ACUUUCUAACCAUGGUCU 5'  
query=miR4227, target=R03G\_12687, score=2.5, range=38-55, strand=  
target 5' UGAAAGAUUGGUACCAAG 3'  
..... .  
query 3' ACUUUCUAACCAUGGUCU 5'  
query=miR4227, target=R03G\_17182, score=3, range=593-610, strand=  
target 5' ACAAGGAUUGGUACCAGG 3'  
.....  
query 3' ACUUUCUAACCAUGGUCU 5'  
query=miR4227, target=R03G\_06830, score=3, range=620-637, strand=  
target 5' UUAAGAUUUGUACCAGA 3'  
: :.....  
query 3' ACUUUCUAACCAUGGUCU 5'  
query=miR4227, target=R03G\_03064, score=3, range=836-853, strand=  
target 5' UGAUAGGUUGGUACCAGU 3'  
... :.....  
query 3' ACUUUCUAACCAUGGUCU 5'  
query=miR4227, target=R03G\_16810, score=3.5, range=305-322, stran  
target 5' CGAAAGAUUGGUACCAAG 3'  
..... .  
query 3' ACUUUCUAACCAUGGUCU 5'  
query=miR4227, target=R03G\_01968, score=3.5, range=662-679, stran  
target 5' UAAAAGAUUGGUACCAAG 3'  
: :..... .  
query 3' ACUUUCUAACCAUGGUCU 5'  
query=miR4227, target=R03G\_10525, score=3.5, range=662-679, stran  
target 5' UAAAAGAUUGGUACCAAG 3'  
: :..... .  
query 3' ACUUUCUAACCAUGGUCU 5'  
query=miR4227, target=R03G\_07678, score=3.5, range=662-679, stran  
target 5' UAAAAGAUUGGUACCAAG 3'  
: :..... .  
query 3' ACUUUCUAACCAUGGUCU 5'

query=miR4227, target=R03G\_17380, score=3.5, range=662-679, stran  
target 5' UAAAAGAUUGGUACCAAG 3'  
: :::::::::::::: .  
query 3' ACUUUCUAACCAUGGUCU 5'  
query=miR4227, target=R03G\_05523, score=3.5, range=662-679, stran  
target 5' UAAAAGAUUGGUACCAAG 3'  
: :::::::::::::: .  
query 3' ACUUUCUAACCAUGGUCU 5'  
query=miR4227, target=R03G\_10531, score=3.5, range=662-679, stran  
target 5' UAAAAGAUUGGUACCAAG 3'  
: :::::::::::::: .  
query 3' ACUUUCUAACCAUGGUCU 5'  
query=miR4227, target=R03G\_07110, score=3.5, range=662-679, stran  
target 5' UAAAAGAUUGGUACCAAG 3'  
: :::::::::::::: .  
query 3' ACUUUCUAACCAUGGUCU 5'  
query=miR4227, target=R03G\_03767, score=3.5, range=662-679, stran  
target 5' UAAAAGAUUGGUACCAAG 3'  
: :::::::::::::: .  
query 3' ACUUUCUAACCAUGGUCU 5'  
query=miR4227, target=R03G\_01949, score=3.5, range=662-679, stran  
target 5' UAAAAGAUUGGUACCAAG 3'  
: :::::::::::::: .  
query 3' ACUUUCUAACCAUGGUCU 5'  
query=miR4227, target=R03G\_07676, score=3.5, range=662-679, stran  
target 5' UAAAAGAUUGGUACCAAG 3'  
: :::::::::::::: .  
query 3' ACUUUCUAACCAUGGUCU 5'  
query=miR4227, target=R03G\_12960, score=3.5, range=323-340, stran  
target 5' UAAAAGAUUGGUACCAAG 3'  
: :::::::::::::: .  
query 3' ACUUUCUAACCAUGGUCU 5'  
query=miR4227, target=R03G\_12974, score=3.5, range=323-340, stran  
target 5' UAAAAGAUUGGUACCAAG 3'  
: :::::::::::::: .  
query 3' ACUUUCUAACCAUGGUCU 5'  
query=miR4227, target=R03G\_07866, score=3.5, range=38-55, strand=  
target 5' UAAAAGAUUGGUACCAAG 3'  
: :::::::::::::: .  
query 3' ACUUUCUAACCAUGGUCU 5'  
query=miR4227, target=R03G\_11953, score=3.5, range=539-556, stran  
target 5' UAAAAGAUUGGUACCAAG 3'  
: :::::::::::::: .  
query 3' ACUUUCUAACCAUGGUCU 5'  
query=miR4227, target=R03G\_04819, score=3.5, range=1030-1047,







::::: ::::: :::::  
query 3' AGUACUCUAGUAAUUAUCAG 5'  
query=miR400-3p, target=R03G\_12476, score=4, range=1806-1825,  
strand=-1  
target 5' UCAUACGAUCAUUGUAGGUC 3'  
::::: ::::: :::::  
query 3' AGUACUCUAGUAAUUAUCAG 5'  
query=miR165a-5p, target=R03G\_07902, score=3, range=192-210, stra  
target 5' CUC-AUCCAGACAACAGUCC 3'  
::: ::::: :::::  
query 3' GAGCUAGGUCUGUUGUAAGG 5'  
query=miR165a-5p, target=R03G\_06179, score=4, range=685-704, stra  
target 5' AUCGAUCCAGACAAUUAUUGC 3'  
::::: ::::: ::::: :  
query 3' GAGCUAGGUCUGUUGUAAGG 5'  
query=miR165a-5p, target=R03G\_00164, score=4, range=2528-2546,  
strand=1  
target 5' CUAGA-CCAGUAACAUAUUC 3'  
:: :: ::::: ::::: :::::  
query 3' GAGCUAGGUCUGUUGUAAGG 5'  
query=miR165a-5p, target=R03G\_11701, score=4, range=2827-2845,  
strand=-1  
target 5' UUUGCUCAGAUACAUAUCC 3'  
...: : ::::: ::::: :::::  
query 3' GAGCUAGGUCUGUUGUAAGG 5'  
query=miR165a-5p, target=R03G\_12331, score=4, range=1087-1105,  
strand=-1  
target 5' AUCGA-ACAGUAACAUAUCC 3'  
::::: ::::: ::::: :::::  
query 3' GAGCUAGGUCUGUUGUAAGG 5'  
query=miR4995, target=R03G\_15904, score=0, range=671-691, strand=  
target 5' UCCUUGACCAAGCCAUGCCUA 3'  
::::: ::::: ::::: :::::  
query 3' AGGAACUGGUUCGGUACGGAU 5'  
query=miR4995, target=R03G\_16782, score=1, range=737-757, strand=  
target 5' UCCUUGACCAAGCCAUGCCUC 3'  
::::: ::::: ::::: :::::  
query 3' AGGAACUGGUUCGGUACGGAU 5'  
query=miR4995, target=R03G\_16780, score=1, range=737-757, strand=  
target 5' UCCUUGACCAAGCCAUGCCUC 3'  
::::: ::::: ::::: :::::  
query 3' AGGAACUGGUUCGGUACGGAU 5'  
query=miR4995, target=R03G\_16853, score=1, range=737-757, strand=  
target 5' UCCUUGACCAAGCCAUGCCUC 3'  
::::: ::::: ::::: :::::



query=miR6169, target=R03G\_15259, score=0, range=879-899, strand=  
target 5' AGAGAGAAAAGACGAUAUCGA 3'  
::::::::::::::::::::::::::

query 3' UCUCUCUUUUCUGCUAUAGCU 5'  
query=miR6169, target=R03G\_07982, score=0, range=879-899, strand=  
target 5' AGAGAGAAAAGACGAUAUCGA 3'  
::::::::::::::::::::::::::

query 3' UCUCUCUUUUCUGCUAUAGCU 5'  
query=miR6169, target=R03G\_02849, score=0, range=879-899, strand=  
target 5' AGAGAGAAAAGACGAUAUCGA 3'  
::::::::::::::::::::::::::

query 3' UCUCUCUUUUCUGCUAUAGCU 5'  
query=miR6169, target=R03G\_00697, score=0, range=879-899, strand=  
target 5' AGAGAGAAAAGACGAUAUCGA 3'  
::::::::::::::::::::::::::

query 3' UCUCUCUUUUCUGCUAUAGCU 5'  
query=miR6169, target=R03G\_07035, score=0, range=879-899, strand=  
target 5' AGAGAGAAAAGACGAUAUCGA 3'  
::::::::::::::::::::::::::

query 3' UCUCUCUUUUCUGCUAUAGCU 5'  
query=miR6169, target=R03G\_11778, score=0, range=879-899, strand=  
target 5' AGAGAGAAAAGACGAUAUCGA 3'  
::::::::::::::::::::::::::

query 3' UCUCUCUUUUCUGCUAUAGCU 5'  
query=miR6169, target=R03G\_01965, score=0, range=879-899, strand=  
target 5' AGAGAGAAAAGACGAUAUCGA 3'  
::::::::::::::::::::::::::

query 3' UCUCUCUUUUCUGCUAUAGCU 5'  
query=miR6169, target=R03G\_08650, score=0, range=879-899, strand=  
target 5' AGAGAGAAAAGACGAUAUCGA 3'  
::::::::::::::::::::::::::

query 3' UCUCUCUUUUCUGCUAUAGCU 5'  
query=miR6169, target=R03G\_08655, score=0, range=879-899, strand=  
target 5' AGAGAGAAAAGACGAUAUCGA 3'  
::::::::::::::::::::::::::

query 3' UCUCUCUUUUCUGCUAUAGCU 5'  
query=miR6169, target=R03G\_10728, score=0, range=798-818, strand=  
target 5' AGAGAGAAAAGACGAUAUCGA 3'  
::::::::::::::::::::::::::

query 3' UCUCUCUUUUCUGCUAUAGCU 5'  
query=miR6169, target=R03G\_12973, score=0, range=879-899, strand=  
target 5' AGAGAGAAAAGACGAUAUCGA 3'  
::::::::::::::::::::::::::

query 3' UCUCUCUUUUCUGCUAUAGCU 5'  
query=miR6169, target=R03G\_02851, score=0, range=879-899, strand=



: ::: :::::::::::::::  
query 3' UCUCUCUUUUCUGCUAUAGCU 5'  
query=miR6169, target=R03G\_15660, score=4, range=446-465, strand=  
target 5' AGAG-GAAAAGGUGGUUUCGA 3'  
:::: :::::::::::::::  
query 3' UCUCUCUUUUCUGCUAUAGCU 5'  
query=miR869.1, target=R03G\_11401, score=0, range=811-831, strand  
target 5' CAAUCACCAGACUUGAACCCA 3'  
:::: :::::::::::::::  
query 3' GUUAGUGGUCUGAACUUGGGU 5'  
query=miR869.1, target=R03G\_16551, score=0, range=811-831, strand  
target 5' CAAUCACCAGACUUGAACCCA 3'  
:::: :::::::::::::::  
query 3' GUUAGUGGUCUGAACUUGGGU 5'  
query=miR869.1, target=R03G\_06441, score=0, range=811-831, strand  
target 5' CAAUCACCAGACUUGAACCCA 3'  
:::: :::::::::::::::  
query 3' GUUAGUGGUCUGAACUUGGGU 5'  
query=miR869.1, target=R03G\_08846, score=0, range=811-831, strand  
target 5' CAAUCACCAGACUUGAACCCA 3'  
:::: :::::::::::::::  
query 3' GUUAGUGGUCUGAACUUGGGU 5'  
query=miR869.1, target=R03G\_11773, score=0, range=811-831, strand  
target 5' CAAUCACCAGACUUGAACCCA 3'  
:::: :::::::::::::::  
query 3' GUUAGUGGUCUGAACUUGGGU 5'  
query=miR869.1, target=R03G\_05635, score=0, range=811-831, strand  
target 5' CAAUCACCAGACUUGAACCCA 3'  
:::: :::::::::::::::  
query 3' GUUAGUGGUCUGAACUUGGGU 5'  
query=miR869.1, target=R03G\_13848, score=0, range=811-831, strand  
target 5' CAAUCACCAGACUUGAACCCA 3'  
:::: :::::::::::::::  
query 3' GUUAGUGGUCUGAACUUGGGU 5'  
query=miR869.1, target=R03G\_01956, score=0, range=811-831, strand  
target 5' CAAUCACCAGACUUGAACCCA 3'  
:::: :::::::::::::::  
query 3' GUUAGUGGUCUGAACUUGGGU 5'  
query=miR869.1, target=R03G\_17285, score=0, range=811-831, strand  
target 5' CAAUCACCAGACUUGAACCCA 3'  
:::: :::::::::::::::  
query 3' GUUAGUGGUCUGAACUUGGGU 5'  
query=miR869.1, target=R03G\_08661, score=0, range=811-831, strand  
target 5' CAAUCACCAGACUUGAACCCA 3'  
:::: :::::::::::::::

query 3' GUUAGUGGUCUGAACUUGGGU 5'  
query=miR869.1, target=R03G\_03571, score=0, range=811-831, strand  
target 5' CAAUCACCAGACUUGAACCCA 3'  
.....  
query 3' GUUAGUGGUCUGAACUUGGGU 5'  
query=miR869.1, target=R03G\_16555, score=0, range=811-831, strand  
target 5' CAAUCACCAGACUUGAACCCA 3'  
.....  
query 3' GUUAGUGGUCUGAACUUGGGU 5'  
query=miR869.1, target=R03G\_15675, score=0, range=811-831, strand  
target 5' CAAUCACCAGACUUGAACCCA 3'  
.....  
query 3' GUUAGUGGUCUGAACUUGGGU 5'  
query=miR869.1, target=R03G\_02689, score=0, range=811-831, strand  
target 5' CAAUCACCAGACUUGAACCCA 3'  
.....  
query 3' GUUAGUGGUCUGAACUUGGGU 5'  
query=miR869.1, target=R03G\_09607, score=0, range=811-831, strand  
target 5' CAAUCACCAGACUUGAACCCA 3'  
.....  
query 3' GUUAGUGGUCUGAACUUGGGU 5'  
query=miR869.1, target=R03G\_13727, score=0, range=250-270, strand  
target 5' CAAUCACCAGACUUGAACCCA 3'  
.....  
query 3' GUUAGUGGUCUGAACUUGGGU 5'  
query=miR869.1, target=R03G\_16822, score=0, range=250-270, strand  
target 5' CAAUCACCAGACUUGAACCCA 3'  
.....  
query 3' GUUAGUGGUCUGAACUUGGGU 5'  
query=miR869.1, target=R03G\_13737, score=0, range=250-270, strand  
target 5' CAAUCACCAGACUUGAACCCA 3'  
.....  
query 3' GUUAGUGGUCUGAACUUGGGU 5'  
query=miR869.1, target=R03G\_07706, score=0, range=148-168, strand  
target 5' CAAUCACCAGACUUGAACCCA 3'  
.....  
query 3' GUUAGUGGUCUGAACUUGGGU 5'  
query=miR869.1, target=R03G\_06423, score=1, range=865-885, strand  
target 5' CAAUCACCGGACUUGAACCCA 3'  
.....  
query 3' GUUAGUGGUCUGAACUUGGGU 5'  
query=miR869.1, target=R03G\_10235, score=1, range=811-831, strand  
target 5' CAAUCACCGGACUUGAACCCA 3'  
.....  
query 3' GUUAGUGGUCUGAACUUGGGU 5'



query=miR869.1, target=R03G\_00681, score=1, range=811-831, strand  
target 5' CAAUCACCGGACUUGAACCCA 3'  
::::::::::::::::::::

query 3' GUUAGUGGUCUGAACUUGGGU 5'  
query=miR869.1, target=R03G\_09483, score=1, range=811-831, strand  
target 5' CAAUCACCGGACUUGAACCCA 3'  
::::::::::::::::::::

query 3' GUUAGUGGUCUGAACUUGGGU 5'  
query=miR869.1, target=R03G\_07875, score=1, range=811-831, strand  
target 5' CAAUCACCGGACUUGAACCCA 3'  
::::::::::::::::::::

query 3' GUUAGUGGUCUGAACUUGGGU 5'  
query=miR869.1, target=R03G\_16807, score=1, range=811-831, strand  
target 5' CAAUCACCGGACUUGAACCCA 3'  
::::::::::::::::::::

query 3' GUUAGUGGUCUGAACUUGGGU 5'  
query=miR869.1, target=R03G\_05336, score=1, range=811-831, strand  
target 5' CAAUCACCGGACUUGAACCCA 3'  
::::::::::::::::::::

query 3' GUUAGUGGUCUGAACUUGGGU 5'  
query=miR869.1, target=R03G\_07303, score=1, range=811-831, strand  
target 5' CAAUCACCGGACUUGAACCCA 3'  
::::::::::::::::::::

query 3' GUUAGUGGUCUGAACUUGGGU 5'  
query=miR869.1, target=R03G\_10732, score=1, range=811-831, strand  
target 5' CAAUCACCGGACUUGAACCCA 3'  
::::::::::::::::::::

query 3' GUUAGUGGUCUGAACUUGGGU 5'  
query=miR869.1, target=R03G\_09499, score=1, range=811-831, strand  
target 5' CAAUCACCGGACUUGAACCCA 3'  
::::::::::::::::::::

query 3' GUUAGUGGUCUGAACUUGGGU 5'  
query=miR869.1, target=R03G\_01652, score=1, range=811-831, strand  
target 5' CAAUCACCGGACUUGAACCCA 3'  
::::::::::::::::::::

query 3' GUUAGUGGUCUGAACUUGGGU 5'  
query=miR869.1, target=R03G\_14359, score=1, range=811-831, strand  
target 5' CAAUCACCGGACUUGAACCCA 3'  
::::::::::::::::::::

query 3' GUUAGUGGUCUGAACUUGGGU 5'  
query=miR869.1, target=R03G\_17382, score=1, range=811-831, strand  
target 5' CAAUCACCGGACUUGAACCCA 3'  
::::::::::::::::::::

query 3' GUUAGUGGUCUGAACUUGGGU 5'  
query=miR869.1, target=R03G\_13151, score=1, range=811-831, strand

```

target 5' CAAUCACCGGACUUGAACCCA 3'
:~::~:~::~:~::~:~::~:~::~:~::~:~::~:~::~:~::~:
query 3' GUUAGUGGUCUGAACUUGGGU 5'
query=miR869.1, target=R03G_17400, score=1, range=685-705, strand
target 5' CAAUCACCGGACUUGAACCCA 3'
:~::~:~::~:~::~:~::~:~::~:~::~:~::~:~::~:~::~:
query 3' GUUAGUGGUCUGAACUUGGGU 5'
query=miR869.1, target=R03G_05915, score=1, range=811-831, strand
target 5' CAAUCACCGGACUUGAACCCA 3'
:~::~:~::~:~::~:~::~:~::~:~::~:~::~:~::~:~::~:
query 3' GUUAGUGGUCUGAACUUGGGU 5'
query=miR869.1, target=R03G_01730, score=1, range=811-831, strand
target 5' CAAUCACCGGACUUGAACCCA 3'
:~::~:~::~:~::~:~::~:~::~:~::~:~::~:~::~:~::~:
query 3' GUUAGUGGUCUGAACUUGGGU 5'
query=miR869.1, target=R03G_05622, score=1, range=811-831, strand
target 5' CAAUCACCGGACUUGAACCCA 3'
:~::~:~::~:~::~:~::~:~::~:~::~:~::~:~::~:~::~:
query 3' GUUAGUGGUCUGAACUUGGGU 5'
query=miR869.1, target=R03G_13456, score=1, range=208-228, strand
target 5' CAAUCACCGGACUUGAACCCA 3'
:~::~:~::~:~::~:~::~:~::~:~::~:~::~:~::~:~::~:
query 3' GUUAGUGGUCUGAACUUGGGU 5'
query=miR869.1, target=R03G_16824, score=1, range=250-270, strand
target 5' CAAUCACCGGACUUGAACCCA 3'
:~::~:~::~:~::~:~::~:~::~:~::~:~::~:~::~:~::~:
query 3' GUUAGUGGUCUGAACUUGGGU 5'
query=miR869.1, target=R03G_09544, score=1.5, range=811-831, str
target 5' CAAUUACCGGACUUGAACCCA 3'
:~::~:~::~:~::~:~::~:~::~:~::~:~::~:~::~:~::~:
query 3' GUUAGUGGUCUGAACUUGGGU 5'
query=miR869.1, target=R03G_01322, score=1.5, range=697-717, stra
target 5' CAAUCACUGGACUUGAACCCA 3'
:~::~:~::~:~::~:~::~:~::~:~::~:~::~:~::~:~::~:
query 3' GUUAGUGGUCUGAACUUGGGU 5'
query=miR869.1, target=R03G_03616, score=2, range=250-270, strand
target 5' CAAUCACCAGACUUGAACCGA 3'
:~::~:~::~:~::~:~::~:~::~:~::~:~::~:~::~:~::~:
query 3' GUUAGUGGUCUGAACUUGGGU 5'
query=miR869.1, target=R03G_15287, score=3.5, range=445-465, stra
target 5' CAGUCACCUGACUUGAAUCCA 3'
:~::~:~::~:~::~:~::~:~::~:~::~:~::~:~::~:~::~:
query 3' GUUAGUGGUCUGAACUUGGGU 5'
query=miR869.1, target=R03G_03766, score=3.5, range=589-609, stra
target 5' CAGUCACCUGACUUGAAUCCA 3'

```

.....  
query 3' GUUAGUGGUCUGAACUUGGGU 5'  
query=miR869.1, target=R03G\_02844, score=3.5, range=589-609, str  
target 5' CAGUCACCUGACUUGAAUCCA 3'  
.....  
query 3' GUUAGUGGUCUGAACUUGGGU 5'  
query=miR869.1, target=R03G\_12664, score=3.5, range=538-558, str  
target 5' CAGUCCCCGGACUUGAAUCCA 3'  
.....  
query 3' GUUAGUGGUCUGAACUUGGGU 5'  
query=miR869.1, target=R03G\_06170, score=3.5, range=546-565, str  
target 5' CAAUCA-CAGACUUGAACUUG 3'  
.....  
query 3' GUUAGUGGUCUGAACUUGGGU 5'  
query=miR869.1, target=R03G\_00766, score=4, range=1800-1819, str  
target 5' CAAUCA-CAGGCUUGAACUUA 3'  
.....  
query 3' GUUAGUGGUCUGAACUUGGGU 5'  
query=miR869.1, target=R03G\_17260, score=4, range=1019-1039, str  
target 5' CGAUUCCCAUACUUGAACCCA 3'  
.....  
query 3' GUUAGUGGUCUGAACUUGGGU 5'  
query=miR447a-3p, target=R03G\_15872, score=0, range=111-130, str  
target 5' CACAAAUUCUCGUCCGCAA 3'  
.....  
query 3' GUGUUUUAAGAGCAGGCGUU 5'  
query=miR447a-3p, target=R03G\_09180, score=0, range=896-915, str  
target 5' CACAAAUUCUCGUCCGCAA 3'  
.....  
query 3' GUGUUUUAAGAGCAGGCGUU 5'  
query=miR447a-3p, target=R03G\_16812, score=0, range=896-915, str  
target 5' CACAAAUUCUCGUCCGCAA 3'  
.....  
query 3' GUGUUUUAAGAGCAGGCGUU 5'  
query=miR447a-3p, target=R03G\_09189, score=0, range=896-915, str  
target 5' CACAAAUUCUCGUCCGCAA 3'  
.....  
query 3' GUGUUUUAAGAGCAGGCGUU 5'  
query=miR447a-3p, target=R03G\_14798, score=0, range=896-915, str  
target 5' CACAAAUUCUCGUCCGCAA 3'  
.....  
query 3' GUGUUUUAAGAGCAGGCGUU 5'  
query=miR447a-3p, target=R03G\_14791, score=0, range=896-915, str  
target 5' CACAAAUUCUCGUCCGCAA 3'  
.....





target 5' GCUUCGCCAAAGAUGCUCCAA 3'  
::::: ::::::::::::::::::::  
query 3' CGAGGAGGUUUCUAUGAGGUU 5'  
query=miR477, target=R03G\_09164, score=2.5, range=1129-1149, stra  
target 5' GCUUCGCCAAAGAUGCUCCAA 3'  
::::: ::::::::::::::::::::  
query 3' CGAGGAGGUUUCUAUGAGGUU 5'  
query=miR477, target=R03G\_17219, score=2.5, range=988-1008, stran  
target 5' GCUUCGCCAAAGAUGCUCCAA 3'  
::::: ::::::::::::::::::::  
query 3' CGAGGAGGUUUCUAUGAGGUU 5'  
query=miR477, target=R03G\_12068, score=2.5, range=988-1008, stran  
target 5' GCUUCGCCAAAGAUGCUCCAA 3'  
::::: ::::::::::::::::::::  
query 3' CGAGGAGGUUUCUAUGAGGUU 5'  
query=miR477, target=R03G\_14707, score=3, range=988-1008, strand=  
target 5' GCUUCGCCAAAGGUACUCCAG 3'  
::::: ::::::::::::::::::::  
query 3' CGAGGAGGUUUCUAUGAGGUU 5'  
query=miR477, target=R03G\_16910, score=3, range=988-1008, strand=  
target 5' GCUUCGCCAAAGGUACUCCAG 3'  
::::: ::::::::::::::::::::  
query 3' CGAGGAGGUUUCUAUGAGGUU 5'  
query=miR477, target=R03G\_17245, score=3, range=988-1008, strand=  
target 5' GCUUCGCCAAAGGUACUCCAG 3'  
::::: ::::::::::::::::::::  
query 3' CGAGGAGGUUUCUAUGAGGUU 5'  
query=miR477, target=R03G\_11285, score=3, range=988-1008, strand=  
target 5' GCUUCGCCAAAGGUACUCCAG 3'  
::::: ::::::::::::::::::::  
query 3' CGAGGAGGUUUCUAUGAGGUU 5'  
query=miR477, target=R03G\_13710, score=3, range=988-1008, strand=  
target 5' GCUUCGCCAAAGGUACUCCAG 3'  
::::: ::::::::::::::::::::  
query 3' CGAGGAGGUUUCUAUGAGGUU 5'  
query=miR477, target=R03G\_17379, score=3, range=82-102, strand=-1  
target 5' GCUUCGCCAAAGGUACUCCAG 3'  
::::: ::::::::::::::::::::  
query 3' CGAGGAGGUUUCUAUGAGGUU 5'  
query=miR477, target=R03G\_01314, score=3, range=82-102, strand=-1  
target 5' GCUUCGCCAAAGGUACUCCAG 3'  
::::: ::::::::::::::::::::  
query 3' CGAGGAGGUUUCUAUGAGGUU 5'  
query=miR477, target=R03G\_13739, score=3, range=82-102, strand=-1  
target 5' GCUUCGCCAAAGGUACUCCAG 3'

::::: :::::::::::::::  
query 3' CGAGGAGGUUUCUAUGAGGUU 5'  
query=miR477, target=R03G\_16939, score=3.5, range=1040-1060, stra  
target 5' GCUCUUUUAAGAUAAUCCAA 3'  
::::: :::::::::::::::  
query 3' CGAGGAGGUUUCUAUGAGGUU 5'  
query=miR477, target=R03G\_10629, score=4, range=306-325, strand=1  
target 5' GCU-CUCGAAAAUACUCCAA 3'  
::: ::: ::: :::::::::::::::  
query 3' CGAGGAGGUUUCUAUGAGGUU 5'  
query=miR477, target=R03G\_13404, score=4, range=27-46, strand=1  
target 5' GAUGCU-CAAAGAUAUUCCAA 3'  
: : : : :::::::::::::::  
query 3' CGAGGAGGUUUCUAUGAGGUU 5'  
query=miR477, target=R03G\_17365, score=4, range=988-1008, strand=  
target 5' GCAUCGCCAAAGGUACUCCAG 3'  
:: .: :::::::::::::::  
query 3' CGAGGAGGUUUCUAUGAGGUU 5'  
query=miR477, target=R03G\_09816, score=4, range=189-208, strand=-  
target 5' GCUUCUCCAAA-AUAUCCAG 3'  
::::: :::::::::::::::  
query 3' CGAGGAGGUUUCUAUGAGGUU 5'  
query=miR4412-5p, target=R03G\_01190, score=0, range=208-229, stra  
target 5' AGUGCAAAGAAUAUCCGCAACA 3'  
::::: :::::::::::::::  
query 3' UCACGUUUCUUAUAGGCGUUGU 5'  
query=miR4412-5p, target=R03G\_16146, score=0, range=385-406, stra  
target 5' AGUGCAAAGAAUAUCCGCAACA 3'  
::::: :::::::::::::::  
query 3' UCACGUUUCUUAUAGGCGUUGU 5'  
query=miR4412-5p, target=R03G\_04677, score=0, range=355-376, stra  
target 5' AGUGCAAAGAAUAUCCGCAACA 3'  
::::: :::::::::::::::  
query 3' UCACGUUUCUUAUAGGCGUUGU 5'  
query=miR4412-5p, target=R03G\_17448, score=0, range=349-370, stra  
target 5' AGUGCAAAGAAUAUCCGCAACA 3'  
::::: :::::::::::::::  
query 3' UCACGUUUCUUAUAGGCGUUGU 5'  
query=miR4412-5p, target=R03G\_01209, score=0, range=349-370, stra  
target 5' AGUGCAAAGAAUAUCCGCAACA 3'  
::::: :::::::::::::::  
query 3' UCACGUUUCUUAUAGGCGUUGU 5'  
query=miR4412-5p, target=R03G\_10239, score=0, range=349-370, stra  
target 5' AGUGCAAAGAAUAUCCGCAACA 3'  
::::: :::::::::::::::

query 3' UCACGUUUCUUAUAGGCGUUGU 5'  
query=miR4412-5p, target=R03G\_07037, score=0, range=295-316, str  
target 5' AGUGCAAAGAAUAUCCGCAACA 3'  
.....  
query 3' UCACGUUUCUUAUAGGCGUUGU 5'  
query=miR4412-5p, target=R03G\_07032, score=0, range=283-304, str  
target 5' AGUGCAAAGAAUAUCCGCAACA 3'  
.....  
query 3' UCACGUUUCUUAUAGGCGUUGU 5'  
query=miR4412-5p, target=R03G\_12466, score=0, range=208-229, str  
target 5' AGUGCAAAGAAUAUCCGCAACA 3'  
.....  
query 3' UCACGUUUCUUAUAGGCGUUGU 5'  
query=miR4412-5p, target=R03G\_02950, score=0, range=208-229, str  
target 5' AGUGCAAAGAAUAUCCGCAACA 3'  
.....  
query 3' UCACGUUUCUUAUAGGCGUUGU 5'  
query=miR4412-5p, target=R03G\_01732, score=0, range=208-229, str  
target 5' AGUGCAAAGAAUAUCCGCAACA 3'  
.....  
query 3' UCACGUUUCUUAUAGGCGUUGU 5'  
query=miR4412-5p, target=R03G\_07713, score=0, range=184-205, str  
target 5' AGUGCAAAGAAUAUCCGCAACA 3'  
.....  
query 3' UCACGUUUCUUAUAGGCGUUGU 5'  
query=miR4412-5p, target=R03G\_09616, score=1, range=349-370, str  
target 5' AGUGCAAAGAAUAUCCGCGACA 3'  
.....  
query 3' UCACGUUUCUUAUAGGCGUUGU 5'  
query=miR4412-5p, target=R03G\_16716, score=1, range=334-355, str  
target 5' AGUGCAAAGGAUAUCCGCAACA 3'  
.....  
query 3' UCACGUUUCUUAUAGGCGUUGU 5'  
query=miR4412-5p, target=R03G\_00243, score=1, range=334-355, str  
target 5' AGUGCAAAGAAUAUCCGUAACA 3'  
.....  
query 3' UCACGUUUCUUAUAGGCGUUGU 5'  
query=miR4412-5p, target=R03G\_07031, score=1, range=355-376, str  
target 5' AGCGCAAAGAAUAUCCGCAACA 3'  
:: .....  
query 3' UCACGUUUCUUAUAGGCGUUGU 5'  
query=miR4412-5p, target=R03G\_16554, score=1, range=355-376, str  
target 5' AGCGCAAAGAAUAUCCGCAACA 3'  
:: .....  
query 3' UCACGUUUCUUAUAGGCGUUGU 5'







```

query=miR5163b-3p, target=R03G_12685, score=3, range=189-208, str
target 5' UCCCACAACCAAGGUAUCCA 3'
: : : : : : : : : : :
query 3' AGGGUGUUGGUUUCAUAGAU 5'
query=miR5163b-3p, target=R03G_15290, score=3, range=135-154, str
target 5' UCCCACAACCAAGAUUCUA 3'
: : : : : : : : : :
query 3' AGGGUGUUGGUUUCAUAGAU 5'
query=miR5163b-3p, target=R03G_13307, score=3, range=168-187, str
target 5' UCCCACAACCAAGGUUCUA 3'
: : : : : : : : : :
query 3' AGGGUGUUGGUUUCAUAGAU 5'
query=miR5163b-3p, target=R03G_03564, score=3, range=620-639, str
target 5' UACCACAACUAAGGUAUCUA 3'
: : : : : : : : : :
query 3' AGGGUGUUGGUUUCAUAGAU 5'
query=miR5163b-3p, target=R03G_03971, score=3.5, range=207-226,
strand=1
target 5' UCCUACAACCAAGGAAUCUA 3'
: : : : : : : : : :
query 3' AGGGUGUUGGUUUCAUAGAU 5'
query=miR5163b-3p, target=R03G_03492, score=3.5, range=1067-1087,
strand=-1
target 5' ACACACGAACCAAAGUAUCUG 3'
: : : : : : : : : :
query 3' AGGGUG-UUGGUUUCAUAGAU 5'
query=miR5163b-3p, target=R03G_02418, score=4, range=2354-2373,
strand=-1
target 5' UUCUUCAACUAAAGUGUCUA 3'
: : : : : : : : : :
query 3' AGGGUGUUGGUUUCAUAGAU 5'
query=miR5163b-3p, target=R03G_08626, score=4, range=1676-1695,
strand=-1
target 5' GCUUCCAACCAAAGUAUUUA 3'
: : : : : : : : : :
query 3' AGGGUGUUGGUUUCAUAGAU 5'
query=miR5163b-3p, target=R03G_10409, score=4, range=131-151,
strand=-1
target 5' UGUCACAGCCAAAGGUAUCUA 3'
: : : : : : : : : :
query 3' AGGGUGUUGGUUU-CAUAGAU 5'
query=miR6282, target=R03G_03573, score=0, range=559-580, strand=
target 5' UUAUACAUCCCCACAUGAUCAA 3'
: : : : : : : : : :
query 3' AAUAUGUAGGGGUGUACUAGUU 5'

```





:::::::::: : : : : :  
query 3' AAUAUGUAGGGGUGUACUAGUU 5'  
query=miR6282, target=R03G\_07723, score=3, range=193-214, strand=  
target 5' UUAUACAGCCCCACAUCAUCA 3'  
:::::::::: : : : : :  
query 3' AAUAUGUAGGGGUGUACUAGUU 5'  
query=miR6282, target=R03G\_13752, score=3, range=193-214, strand=  
target 5' UUAUACAGCCCCACAUCAUCA 3'  
:::::::::: : : : : :  
query 3' AAUAUGUAGGGGUGUACUAGUU 5'  
query=miR6282, target=R03G\_03791, score=3, range=193-214, strand=  
target 5' UUAUACAGCCCCACAUCAUCA 3'  
:::::::::: : : : : :  
query 3' AAUAUGUAGGGGUGUACUAGUU 5'  
query=miR6282, target=R03G\_11536, score=3, range=193-214, strand=  
target 5' UUAUACAGCCCCACAUCAUCA 3'  
:::::::::: : : : : :  
query 3' AAUAUGUAGGGGUGUACUAGUU 5'  
query=miR6282, target=R03G\_01725, score=3, range=193-214, strand=  
target 5' UUAUACAGCCCCACAUCAUCA 3'  
:::::::::: : : : : :  
query 3' AAUAUGUAGGGGUGUACUAGUU 5'  
query=miR6282, target=R03G\_09926, score=3, range=193-214, strand=  
target 5' UUAUACAGCCCCACAUCAUCA 3'  
:::::::::: : : : : :  
query 3' AAUAUGUAGGGGUGUACUAGUU 5'  
query=miR6282, target=R03G\_16124, score=3, range=193-214, strand=  
target 5' UUAUACAGCCCCACAUCAUCA 3'  
:::::::::: : : : : :  
query 3' AAUAUGUAGGGGUGUACUAGUU 5'  
query=miR6282, target=R03G\_12950, score=3, range=193-214, strand=  
target 5' UUAUACAGCCCCACAUCAUCA 3'  
:::::::::: : : : : :  
query 3' AAUAUGUAGGGGUGUACUAGUU 5'  
query=miR6282, target=R03G\_15286, score=3, range=193-214, strand=  
target 5' UUAUACAGCCCCACAUCAUCA 3'  
:::::::::: : : : : :  
query 3' AAUAUGUAGGGGUGUACUAGUU 5'  
query=miR6282, target=R03G\_05516, score=3, range=193-214, strand=  
target 5' UUAUACAGCCCCACAUCAUCA 3'  
:::::::::: : : : : :  
query 3' AAUAUGUAGGGGUGUACUAGUU 5'  
query=miR6282, target=R03G\_15145, score=3, range=193-214, strand=  
target 5' UUAUACAGCCCCACAUCAUCA 3'  
:::::::::: : : : : :







```
: :::::::::::::: :::
query 3' GUCAACCUAUUUCUUACUGU 5'
query=miR5632-5p, target=R03G_01483, score=4, range=457-475, stra
target 5' CAUUUGUAUAAAGAAU-ACA 3'
:: :: :::::::::::::: :::
query 3' GUCAACCUAUUUCUUACUGU 5'
query=miR5632-5p, target=R03G_10584, score=4, range=660-679, stra
target 5' CAGUUUGAUAAAGAUUGAUA 3'
:::: :::::::::::::: :::
query 3' GUCAACCUAUUUCUUACUGU 5'
query=miR5632-5p, target=R03G_16992, score=4, range=38-56, strand
target 5' UGGUU-GAUAAAGAAUGGUA 3'
..... :::::::::::::: :::
query 3' GUCAACCUAUUUCUUACUGU 5'
query=miR5632-5p, target=R03G_03359, score=4, range=498-516, stra
target 5' GAGGUGG-UAAAGAAUGACA 3'
:: :: :::::::::::::: :::
query 3' GUCAACCUAUUUCUUACUGU 5'
query=miR5632-5p, target=R03G_06155, score=4, range=1158-1176,
strand=-1
target 5' GAAUU-GAUAGAGAAUGACA 3'
: :: :::::::::::::: :::
query 3' GUCAACCUAUUUCUUACUGU 5'
query=miR5632-5p, target=R03G_09999, score=4, range=384-402, stra
target 5' CAG-UCCAUAAGAAUGACC 3'
::: : :::::::::::::: :::
query 3' GUCAACCUAUUUCUUACUGU 5'
query=miR5632-5p, target=R03G_13889, score=4, range=248-266, stra
target 5' UUGUUGGAUAAAG-AUGACG 3'
. :::::::::::::: :::
query 3' GUCAACCUAUUUCUUACUGU 5'
query=miR7122-5p, target=R03G_15154, score=0, range=424-446, stra
target 5' CGACGCGUAGUAUUCUCUGAUAA 3'
::::::::::::::::::::::::::
query 3' GCUGCGCAUCAUAAGAGACUAUU 5'
query=miR7122-5p, target=R03G_17409, score=0, range=424-446, stra
target 5' CGACGCGUAGUAUUCUCUGAUAA 3'
::::::::::::::::::::::::::
query 3' GCUGCGCAUCAUAAGAGACUAUU 5'
query=miR7122-5p, target=R03G_12526, score=0, range=424-446, stra
target 5' CGACGCGUAGUAUUCUCUGAUAA 3'
::::::::::::::::::::::::::
query 3' GCUGCGCAUCAUAAGAGACUAUU 5'
query=miR7122-5p, target=R03G_13706, score=0, range=382-404, stra
target 5' CGACGCGUAGUAUUCUCUGAUAA 3'
```

query 3' GCUGCGCAUCAUAAGAGACUAAU 5'  
query=miR7122-5p, target=R03G\_17211, score=0, range=424-446, str  
target 5' CGACGCGUAGUAUUCUCUGAUAA 3'

query 3' GCUGCGCAUCAUAAGAGACUAAU 5'  
query=miR7122-5p, target=R03G\_12172, score=0, range=424-446, str  
target 5' CGACGCGUAGUAUUCUCUGAUAA 3'

query 3' GCUGCGCAUCAUAAGAGACUAAU 5'  
query=miR7122-5p, target=R03G\_03617, score=1, range=424-446, str  
target 5' CGACGCGUAGUAUUCUCUGAUGA 3'

query 3' GCUGCGCAUCAUAAGAGACUAAU 5'  
query=miR7122-5p, target=R03G\_10720, score=1, range=424-446, str  
target 5' CGACGCGUAGUAUUCUCUGAUGA 3'

query 3' GCUGCGCAUCAUAAGAGACUAAU 5'  
query=miR7122-5p, target=R03G\_09924, score=1, range=424-446, str  
target 5' CGACGCGUAGUAUUCUCUGAUGA 3'

query 3' GCUGCGCAUCAUAAGAGACUAAU 5'  
query=miR7122-5p, target=R03G\_11948, score=1, range=424-446, str  
target 5' CGACGCGUAGUAUUCUCUGAUGA 3'

query 3' GCUGCGCAUCAUAAGAGACUAAU 5'  
query=miR7122-5p, target=R03G\_11244, score=1, range=424-446, str  
target 5' CGACGCGUAGUAUUCUCUGAUGA 3'

query 3' GCUGCGCAUCAUAAGAGACUAAU 5'  
query=miR7122-5p, target=R03G\_03987, score=1, range=424-446, str  
target 5' CGACGCGUAGUAUUCUCUGAUGA 3'

query 3' GCUGCGCAUCAUAAGAGACUAAU 5'  
query=miR7122-5p, target=R03G\_01950, score=1, range=424-446, str  
target 5' CGACGCGUAGUAUUCUCUGAUGA 3'

query 3' GCUGCGCAUCAUAAGAGACUAAU 5'  
query=miR7122-5p, target=R03G\_07994, score=1, range=424-446, str  
target 5' CGACGCGUAGUAUUCUCUGAUGA 3'

query 3' GCUGCGCAUCAUAAGAGACUAAU 5'  
query=miR7122-5p, target=R03G\_05916, score=1, range=424-446, str  
target 5' CGACGCGUAGUAUUCUCUGAUGA 3'





query=miR5050, target=R03G\_13220, score=0.5, range=1304-1323, str  
target 5' AUGUUGGUGAAUCGACCUCA 3'  
.....  
query 3' UACGACCACUUAGCUGGAGU 5'  
query=miR5050, target=R03G\_10401, score=3, range=5665-5684, stran  
target 5' CUGAUUGUGAAUCGACCUCA 3'  
:: : .....

query 3' UACGACCACUUAGCUGGAGU 5'  
query=miR5050, target=R03G\_12891, score=4, range=5566-5585, stran  
target 5' UUGAUUGUGAAUCGGCCUCA 3'  
:: : .....

query 3' UACGACCACUUAGCUGGAGU 5'  
query=miR5050, target=R03G\_08529, score=4, range=312-330, strand=  
target 5' AUG-UCAUGAAUCGACCUCU 3'  
::: : .....

query 3' UACGACCACUUAGCUGGAGU 5'  
query=miR5050, target=R03G\_13992, score=4, range=456-474, strand=  
target 5' GUG-UGAUGAAUCGACUUCG 3'  
.::: :: .....

query 3' UACGACCACUUAGCUGGAGU 5'  
query=miR390a-5p, target=R03G\_12249, score=3.5, range=310-329,  
strand=1  
target 5' AUGCUAUCCCUCCUGAGUUC 3'  
.....

query 3' CGCGAUAGGGAGGACUCGAA 5'  
query=miR6148a, target=R03G\_13221, score=0, range=2994-3014, stra  
target 5' AAGAACAAGCGAUCGACCGCA 3'  
.....

query 3' UUCUUGUUCGCUAGCUGGCGU 5'  
query=miR6148a, target=R03G\_13224, score=0, range=2994-3014, stra  
target 5' AAGAACAAGCGAUCGACCGCA 3'  
.....

query 3' UUCUUGUUCGCUAGCUGGCGU 5'  
query=miR6148a, target=R03G\_04123, score=0, range=2994-3014, stra  
target 5' AAGAACAAGCGAUCGACCGCA 3'  
.....

query 3' UUCUUGUUCGCUAGCUGGCGU 5'  
query=miR6148a, target=R03G\_04120, score=0, range=2994-3014, stra  
target 5' AAGAACAAGCGAUCGACCGCA 3'  
.....

query 3' UUCUUGUUCGCUAGCUGGCGU 5'  
query=miR6148a, target=R03G\_13218, score=0, range=1407-1427, stra  
target 5' AAGAACAAGCGAUCGACCGCA 3'  
.....

query 3' UUCUUGUUCGCUAGCUGGCGU 5'

query=miR6148a, target=R03G\_02078, score=3, range=185-205, strand  
target 5' AAGAUCAAGCGAUCGACCCCA 3'  
:::: :::::::::::::: ::  
query 3' UUCUUGUUCGCUAGCUGGCGU 5'  
query=miR6148a, target=R03G\_13696, score=3.5, range=651-672, stra  
target 5' GGCAUACAGGCGAUCGACCGCA 3'  
.. : ::::::::::::::  
query 3' UUCU-UGUUCGCUAGCUGGCGU 5'  
query=miR847-3p, target=R03G\_16744, score=0, range=1038-1058,  
strand=-1  
target 5' CGACCAGAAGAAGAGGAGUCA 3'  
:::: ::::::::::::::  
query 3' GCUGGUCUUCUUCUCCUCAGU 5'  
query=miR847-3p, target=R03G\_01203, score=0, range=1038-1058,  
strand=-1  
target 5' CGACCAGAAGAAGAGGAGUCA 3'  
:::: ::::::::::::::  
query 3' GCUGGUCUUCUUCUCCUCAGU 5'  
query=miR847-3p, target=R03G\_11403, score=0, range=1038-1058,  
strand=-1  
target 5' CGACCAGAAGAAGAGGAGUCA 3'  
:::: ::::::::::::::  
query 3' GCUGGUCUUCUUCUCCUCAGU 5'  
query=miR847-3p, target=R03G\_06416, score=0, range=1038-1058,  
strand=-1  
target 5' CGACCAGAAGAAGAGGAGUCA 3'  
:::: ::::::::::::::  
query 3' GCUGGUCUUCUUCUCCUCAGU 5'  
query=miR847-3p, target=R03G\_01718, score=0, range=1038-1058,  
strand=-1  
target 5' CGACCAGAAGAAGAGGAGUCA 3'  
:::: ::::::::::::::  
query 3' GCUGGUCUUCUUCUCCUCAGU 5'  
query=miR847-3p, target=R03G\_15869, score=0, range=1038-1058,  
strand=-1  
target 5' CGACCAGAAGAAGAGGAGUCA 3'  
:::: ::::::::::::::  
query 3' GCUGGUCUUCUUCUCCUCAGU 5'  
query=miR847-3p, target=R03G\_10560, score=0, range=1038-1058,  
strand=-1  
target 5' CGACCAGAAGAAGAGGAGUCA 3'  
:::: ::::::::::::::  
query 3' GCUGGUCUUCUUCUCCUCAGU 5'  
query=miR847-3p, target=R03G\_11275, score=0, range=1038-1058,  
strand=-1











query 3' CGUCGUAACAGUUUCUAUAGA 5'  
query=miR172c-3p, target=R03G\_16898, score=0, range=224-244, strand  
target 5' GCAGCAUUGUCAAAAGAUUCU 3'

query 3' CGUCGUAACAGUUUCUAUAGA 5'  
query=miR172c-3p, target=R03G\_16821, score=0, range=224-244, strand  
target 5' GCAGCAUUGUCAAAAGAUUCU 3'

query 3' CGUCGUAACAGUUUCUAUAGA 5'  
query=miR172c-3p, target=R03G\_17452, score=0, range=224-244, strand  
target 5' GCAGCAUUGUCAAAAGAUUCU 3'

query 3' CGUCGUAACAGUUUCUAUAGA 5'  
query=miR172c-3p, target=R03G\_13721, score=0, range=224-244, strand  
target 5' GCAGCAUUGUCAAAAGAUUCU 3'

query 3' CGUCGUAACAGUUUCUAUAGA 5'  
query=miR172c-3p, target=R03G\_01311, score=0, range=224-244, strand  
target 5' GCAGCAUUGUCAAAAGAUUCU 3'

query 3' CGUCGUAACAGUUUCUAUAGA 5'  
query=miR172c-3p, target=R03G\_14623, score=0, range=224-244, strand  
target 5' GCAGCAUUGUCAAAAGAUUCU 3'

query 3' CGUCGUAACAGUUUCUAUAGA 5'  
query=miR172c-3p, target=R03G\_03751, score=0, range=218-238, strand  
target 5' GCAGCAUUGUCAAAAGAUUCU 3'

query 3' CGUCGUAACAGUUUCUAUAGA 5'  
query=miR172c-3p, target=R03G\_05618, score=0, range=218-238, strand  
target 5' GCAGCAUUGUCAAAAGAUUCU 3'

query 3' CGUCGUAACAGUUUCUAUAGA 5'  
query=miR172c-3p, target=R03G\_03793, score=0, range=224-244, strand  
target 5' GCAGCAUUGUCAAAAGAUUCU 3'

query 3' CGUCGUAACAGUUUCUAUAGA 5'  
query=miR172c-3p, target=R03G\_17426, score=0, range=29-49, strand  
target 5' GCAGCAUUGUCAAAAGAUUCU 3'

query 3' CGUCGUAACAGUUUCUAUAGA 5'  
query=miR172c-3p, target=R03G\_02234, score=0, range=29-49, strand  
target 5' GCAGCAUUGUCAAAAGAUUCU 3'



query 3' GGGUUUGCUGGUUCUGCUGCU 5'  
query=miR3695, target=R03G\_16800, score=0, range=507-527, strand=  
target 5' CCCAAACGACCAAGACGACGA 3'

query 3' GGGUUUGCUGGUUCUGCUGCU 5'  
query=miR3695, target=R03G\_15265, score=0, range=507-527, strand=  
target 5' CCCAAACGACCAAGACGACGA 3'

query 3' GGGUUUGCUGGUUCUGCUGCU 5'  
query=miR3695, target=R03G\_13219, score=0, range=507-527, strand=  
target 5' CCCAAACGACCAAGACGACGA 3'

query 3' GGGUUUGCUGGUUCUGCUGCU 5'  
query=miR3695, target=R03G\_00682, score=0, range=513-533, strand=  
target 5' CCCAAACGACCAAGACGACGA 3'

query 3' GGGUUUGCUGGUUCUGCUGCU 5'  
query=miR3695, target=R03G\_13217, score=1, range=507-527, strand=  
target 5' CCCAAACGACCAAGACGGCGA 3'

query 3' GGGUUUGCUGGUUCUGCUGCU 5'  
query=miR3695, target=R03G\_14352, score=1, range=507-527, strand=  
target 5' CCCAAACGACCAAGACGGCGA 3'

query 3' GGGUUUGCUGGUUCUGCUGCU 5'  
query=miR3695, target=R03G\_15266, score=1, range=507-527, strand=  
target 5' CCCAAACGACCAAGACGGCGA 3'

query 3' GGGUUUGCUGGUUCUGCUGCU 5'  
query=miR3695, target=R03G\_10830, score=3, range=756-775, strand=  
target 5' UCCAAAC-ACCAAGACGAUGG 3'

query 3' GGGUUUGCUGGUUCUGCUGCU 5'  
query=miR3695, target=R03G\_16248, score=4, range=5334-5354, stran  
target 5' GCCAAAAGAUCAAGACGACGU 3'

query 3' GGGUUUGCUGGUUCUGCUGCU 5'  
query=miR3695, target=R03G\_03330, score=4, range=822-841, strand=  
target 5' UCCAAGC-ACCAAGAUGACGC 3'

query 3' GGGUUUGCUGGUUCUGCUGCU 5'  
query=miR3695, target=R03G\_14239, score=4, range=1836-1857, stran  
target 5' ACCAAAGGAACCAAGAUGACGA 3'

query 3' GGGUUUGC-UGGUUCUGCUGCU 5'  
query=miR3695, target=R03G\_07275, score=4, range=507-528, strand=  
target 5' ACCACCGUGACCAAGACGACGA 3'  
::: ..:::  
query 3' GGGU-UUGCUGGUUCUGCUGCU 5'  
query=miR3695, target=R03G\_10025, score=4, range=1769-1788, stran  
target 5' AGCAAA-AACCAAGACGACGA 3'  
:::: ..:::  
query 3' GGGUUUGCUGGUUCUGCUGCU 5'  
query=miR3510, target=R03G\_06495, score=2, range=1063-1084, stran  
target 5' UUUAGACCUGAAAGAUGGUUAA 3'  
:::..: ..:::  
query 3' AAGUCAGGGCUUUCUACCAAUU 5'  
query=miR842, target=R03G\_11952, score=2, range=54-75, strand=-1  
target 5' AGUUGACAGAUCUGGGACCAUA 3'  
::::: ..:::  
query 3' CCAACUGCCUAGACCCUGGUAU 5'  
query=miR842, target=R03G\_12444, score=4, range=808-830, strand=1  
target 5' GGUAUGACGGAUUUGGGCCAUA 3'  
::: ..:::  
query 3' CCA-ACUGCCUAGACCCUGGUAU 5'  
query=miR7807a-3p, target=R03G\_16691, score=0, range=266-284, str  
target 5' GUAUGUAUGCAAUCCUCA 3'  
::::: ..:::  
query 3' CAUACAUACGUUUAGGAGU 5'  
query=miR7807a-3p, target=R03G\_07740, score=0, range=266-284, str  
target 5' GUAUGUAUGCAAUCCUCA 3'  
::::: ..:::  
query 3' CAUACAUACGUUUAGGAGU 5'  
query=miR7807a-3p, target=R03G\_10873, score=0, range=266-284, str  
target 5' GUAUGUAUGCAAUCCUCA 3'  
::::: ..:::  
query 3' CAUACAUACGUUUAGGAGU 5'  
query=miR7807a-3p, target=R03G\_10052, score=0, range=266-284, str  
target 5' GUAUGUAUGCAAUCCUCA 3'  
::::: ..:::  
query 3' CAUACAUACGUUUAGGAGU 5'  
query=miR7807a-3p, target=R03G\_11965, score=0, range=266-284, str  
target 5' GUAUGUAUGCAAUCCUCA 3'  
::::: ..:::  
query 3' CAUACAUACGUUUAGGAGU 5'  
query=miR7807a-3p, target=R03G\_01616, score=0, range=266-284, str  
target 5' GUAUGUAUGCAAUCCUCA 3'  
::::: ..:::  
query 3' CAUACAUACGUUUAGGAGU 5'



strand=-1  
target 5' AUAUGUAGGCAAAUCCUCC 3'  
:::::: ::::::::::::::  
query 3' CAUACAUACGUUUAGGAGU 5'  
query=miR7807a-3p, target=R03G\_05776, score=4, range=333-350,  
strand=-1  
target 5' GUCU-UGUGCAAUUCUUCA 3'  
:: : :::::::::::::::  
query 3' CAUACAUACGUUUAGGAGU 5'  
query=miR7807a-3p, target=R03G\_08094, score=4, range=75-92, stran  
target 5' UUAAG-AUGCAAUUCUCA 3'  
:: : :::::::::::::::  
query 3' CAUACAUACGUUUAGGAGU 5'  
query=miR6214, target=R03G\_01294, score=1, range=1752-1772, stran  
target 5' UGAUCGUCGCUCUCGUCGUCA 3'  
:::::: :::::::::::::::  
query 3' ACUAGCACCGAGAGCAGCAGU 5'  
query=miR6214, target=R03G\_17251, score=1, range=387-407, strand=  
target 5' UGAUCGUCGCUCUCGUCGUCA 3'  
:::::: :::::::::::::::  
query 3' ACUAGCACCGAGAGCAGCAGU 5'  
query=miR6214, target=R03G\_16366, score=3, range=2679-2699, stran  
target 5' UGAUCGUCGCUCUCGCCGUCA 3'  
:::::: :::::::::: ::::::  
query 3' ACUAGCACCGAGAGCAGCAGU 5'  
query=miR6214, target=R03G\_07735, score=3, range=2583-2603, stran  
target 5' UGAUCGUCGCUCUCGCCGUCA 3'  
:::::: :::::::::: ::::::  
query 3' ACUAGCACCGAGAGCAGCAGU 5'  
query=miR6214, target=R03G\_10543, score=3, range=2136-2156, stran  
target 5' UGAUCGUCGCUCUCGCCGUCA 3'  
:::::: :::::::::: ::::::  
query 3' ACUAGCACCGAGAGCAGCAGU 5'  
query=miR6214, target=R03G\_16919, score=3, range=258-278, strand=  
target 5' UGAUCGUCGCUCUCGCCGUCA 3'  
:::::: :::::::::: ::::::  
query 3' ACUAGCACCGAGAGCAGCAGU 5'  
query=miR6214, target=R03G\_14563, score=3, range=246-266, strand=  
target 5' UGAUCGUCGCUCUCGCCGUCA 3'  
:::::: :::::::::: ::::::  
query 3' ACUAGCACCGAGAGCAGCAGU 5'  
query=miR6214, target=R03G\_03008, score=3.5, range=1044-1064, str  
target 5' UGGACGUGGCCUCUCGUCA 3'  
:: . :::::::::: ::::::::::  
query 3' ACUAGCACCGAGAGCAGCAGU 5'





target 5' UACUGGAGUCUGAUAAACUAUCCA 3'  
:~::~:  
query 3' AUGAUCUCAGACUAUUGAUAGGU 5'  
query=miR5788, target=R03G\_10558, score=0.5, range=305-327, stran  
target 5' UACUGGAGUCUGAUAAACUAUCCA 3'  
:~::~:  
query 3' AUGAUCUCAGACUAUUGAUAGGU 5'  
query=miR5788, target=R03G\_13867, score=1, range=2468-2490, stran  
target 5' UAAUAGAGUCUGAUAAACUAUCCA 3'  
:: :~::~:  
query 3' AUGAUCUCAGACUAUUGAUAGGU 5'  
query=miR5788, target=R03G\_06442, score=2, range=3209-3231, stran  
target 5' UAUUGGAAUCUGAUAAACUAUCCA 3'  
:~::~:  
query 3' AUGAUCUCAGACUAUUGAUAGGU 5'  
query=miR5788, target=R03G\_02691, score=2, range=6041-6063, stran  
target 5' UAUUGGAAUCUGAUAAACUAUCCA 3'  
:~::~:  
query 3' AUGAUCUCAGACUAUUGAUAGGU 5'  
query=miR5788, target=R03G\_09965, score=2, range=2552-2574, stran  
target 5' UAUUGGAAUCUGAUAAACUAUCCA 3'  
:~::~:  
query 3' AUGAUCUCAGACUAUUGAUAGGU 5'  
query=miR5788, target=R03G\_13920, score=2, range=2552-2574, stran  
target 5' UAUUGGAAUCUGAUAAACUAUCCA 3'  
:~::~:  
query 3' AUGAUCUCAGACUAUUGAUAGGU 5'  
query=miR5788, target=R03G\_03547, score=2, range=2552-2574, stran  
target 5' UAUUGGAAUCUGAUAAACUAUCCA 3'  
:~::~:  
query 3' AUGAUCUCAGACUAUUGAUAGGU 5'  
query=miR5788, target=R03G\_02959, score=2, range=2552-2574, stran  
target 5' UAUUGGAAUCUGAUAAACUAUCCA 3'  
:~::~:  
query 3' AUGAUCUCAGACUAUUGAUAGGU 5'  
query=miR5788, target=R03G\_06427, score=2, range=2144-2166, stran  
target 5' UAUUGGAAUCUGAUAAACUAUCCA 3'  
:~::~:  
query 3' AUGAUCUCAGACUAUUGAUAGGU 5'  
query=miR5788, target=R03G\_17326, score=2, range=2384-2406, stran  
target 5' UAUUGGAAUCUGAUAAACUAUCCA 3'  
:~::~:  
query 3' AUGAUCUCAGACUAUUGAUAGGU 5'  
query=miR5788, target=R03G\_06428, score=2, range=1646-1668, stran  
target 5' UAUUGGAAUCUGAUAAACUAUCCA 3'



query 3' AACGGAUGUUUGAUACUGAUUU 5'  
query=miR5208d, target=R03G\_17287, score=3, range=1468-1489, strand=1  
target 5' UUGCCUACAAACUAUGACUGUA 3'

query 3' AACGGAUGUUUGAUACUGAUUU 5'  
query=miR5208d, target=R03G\_01944, score=3, range=1468-1489, strand=1  
target 5' UUGCCUACAAACUAUGACUGUA 3'

query 3' AACGGAUGUUUGAUACUGAUUU 5'  
query=miR5208d, target=R03G\_13849, score=3, range=1468-1489, strand=1  
target 5' UUGCCUACAAACUAUGACUGUA 3'

query 3' AACGGAUGUUUGAUACUGAUUU 5'  
query=miR5208d, target=R03G\_03749, score=3, range=1468-1489, strand=1  
target 5' UUGCCUACAAACUAUGACUGUA 3'

query 3' AACGGAUGUUUGAUACUGAUUU 5'  
query=miR5208d, target=R03G\_15573, score=3, range=1468-1489, strand=1  
target 5' UUGCCUACAAACUAUGACUGUA 3'

query 3' AACGGAUGUUUGAUACUGAUUU 5'  
query=miR5208d, target=R03G\_10420, score=3, range=1468-1489, strand=1  
target 5' UUGCCUACAAACUAUGACUGUA 3'

query 3' AACGGAUGUUUGAUACUGAUUU 5'  
query=miR5208d, target=R03G\_02966, score=3, range=739-760, strand=-1  
target 5' UUGCCUACAAACUAUGACUGUA 3'

query 3' AACGGAUGUUUGAUACUGAUUU 5'  
query=miR5208d, target=R03G\_17446, score=3, range=1468-1489, strand=1  
target 5' UUGCCUACAAACUAUGACUGUA 3'

query 3' AACGGAUGUUUGAUACUGAUUU 5'  
query=miR5208d, target=R03G\_02708, score=3, range=1201-1222, strand=1  
target 5' UUGCCUACAAACUAUGACUGUA 3'

query 3' AACGGAUGUUUGAUACUGAUUU 5'  
query=miR5208d, target=R03G\_01056, score=4, range=1363-1384, strand=1  
target 5' CUGCCUACAAACUAUGACUACU 3'

query 3' AACGGAUGUUUGAUACUGAUUU 5'  
query=miR3440b-3p, target=R03G\_11266, score=0, range=313-334, strand=-1  
target 5' AGCUUCCCUUGACCGGAUCCA 3'

query 3' UCGAAAGGGAACUGGCCUAGGU 5'  
query=miR3440b-3p, target=R03G\_10866, score=2, range=490-511,  
strand=-1  
target 5' AGCUUCCCCUGACCGGAUCCA 3'  
query 3' UCGAAAGGGAACUGGCCUAGGU 5'  
query=miR3440b-3p, target=R03G\_07688, score=2, range=490-511,  
strand=-1  
target 5' AGCUUCCCCUGACCGGAUCCA 3'  
query 3' UCGAAAGGGAACUGGCCUAGGU 5'  
query=miR3440b-3p, target=R03G\_13266, score=2, range=268-289,  
strand=-1  
target 5' AGCUUCCCCUGACCGGAUCCA 3'  
query 3' UCGAAAGGGAACUGGCCUAGGU 5'  
query=miR3440b-3p, target=R03G\_13271, score=3, range=490-511,  
strand=-1  
target 5' AGCUUCCCCUGAUCGGAUCCA 3'  
query 3' UCGAAAGGGAACUGGCCUAGGU 5'  
query=miR3440b-3p, target=R03G\_16359, score=3, range=490-511,  
strand=-1  
target 5' AGCUUCCCCUGAUCGGAUCCA 3'  
query 3' UCGAAAGGGAACUGGCCUAGGU 5'  
query=miR3440b-3p, target=R03G\_16545, score=3, range=490-511,  
strand=-1  
target 5' AGCUUCCCCUGAUCGGAUCCA 3'  
query 3' UCGAAAGGGAACUGGCCUAGGU 5'  
query=miR3440b-3p, target=R03G\_00255, score=3, range=490-511,  
strand=-1  
target 5' AGCUUCCCCUGAUCGGAUCCA 3'  
query 3' UCGAAAGGGAACUGGCCUAGGU 5'  
query=miR3440b-3p, target=R03G\_09612, score=3, range=490-511,  
strand=-1  
target 5' AGCUUCCCCUGAUCGGAUCCA 3'  
query 3' UCGAAAGGGAACUGGCCUAGGU 5'  
query=miR3440b-3p, target=R03G\_14621, score=3, range=148-169,  
strand=-1  
target 5' AGCUUCCCCUGAUCGGAUCCA 3'

query 3' UCGAAAGGGAACUGGCCUAGGU 5'  
query=miR3440b-3p, target=R03G\_10800, score=3, range=148-169,  
strand=-1  
target 5' AGCUUCCCCUGAUCGGAUCCA 3'

query 3' UCGAAAGGGAACUGGCCUAGGU 5'  
query=miR6209, target=R03G\_07716, score=0, range=214-233, strand=  
target 5' CGCACAGCUUCUGAUGCUCU 3'

query 3' GCGUGUCGAAGACUACGAGU 5'  
query=miR6209, target=R03G\_17468, score=0, range=160-179, strand=  
target 5' CGCACAGCUUCUGAUGCUCU 3'

query 3' GCGUGUCGAAGACUACGAGU 5'  
query=miR6209, target=R03G\_04671, score=0, range=229-248, strand=  
target 5' CGCACAGCUUCUGAUGCUCU 3'

query 3' GCGUGUCGAAGACUACGAGU 5'  
query=miR6209, target=R03G\_17152, score=0, range=208-227, strand=  
target 5' CGCACAGCUUCUGAUGCUCU 3'

query 3' GCGUGUCGAAGACUACGAGU 5'  
query=miR6209, target=R03G\_12665, score=0, range=208-227, strand=  
target 5' CGCACAGCUUCUGAUGCUCU 3'

query 3' GCGUGUCGAAGACUACGAGU 5'  
query=miR6209, target=R03G\_00252, score=0, range=283-302, strand=  
target 5' CGCACAGCUUCUGAUGCUCU 3'

query 3' GCGUGUCGAAGACUACGAGU 5'  
query=miR6209, target=R03G\_16144, score=0, range=229-248, strand=  
target 5' CGCACAGCUUCUGAUGCUCU 3'

query 3' GCGUGUCGAAGACUACGAGU 5'  
query=miR6209, target=R03G\_13860, score=0, range=229-248, strand=  
target 5' CGCACAGCUUCUGAUGCUCU 3'

query 3' GCGUGUCGAAGACUACGAGU 5'  
query=miR6209, target=R03G\_07111, score=0, range=229-248, strand=  
target 5' CGCACAGCUUCUGAUGCUCU 3'

query 3' GCGUGUCGAAGACUACGAGU 5'  
query=miR6209, target=R03G\_09598, score=0, range=160-179, strand=  
target 5' CGCACAGCUUCUGAUGCUCU 3'

query 3' GCGUGUCGAAGACUACGAGU 5'  
query=miR6209, target=R03G\_13000, score=0, range=160-179, strand=  
target 5' CGCACAGCUUCUGAUGCUCU 3'

query 3' GCGUGUCGAAGACUACGAGU 5'  
query=miR6209, target=R03G\_14972, score=0, range=160-179, strand=  
target 5' CGCACAGCUUCUGAUGCUCU 3'

query 3' GCGUGUCGAAGACUACGAGU 5'  
query=miR6209, target=R03G\_01310, score=0, range=160-179, strand=  
target 5' CGCACAGCUUCUGAUGCUCU 3'

query 3' GCGUGUCGAAGACUACGAGU 5'  
query=miR6209, target=R03G\_01738, score=0, range=160-179, strand=  
target 5' CGCACAGCUUCUGAUGCUCU 3'

query 3' GCGUGUCGAAGACUACGAGU 5'  
query=miR6209, target=R03G\_06740, score=0, range=160-179, strand=  
target 5' CGCACAGCUUCUGAUGCUCU 3'

query 3' GCGUGUCGAAGACUACGAGU 5'  
query=miR6209, target=R03G\_13295, score=0, range=160-179, strand=  
target 5' CGCACAGCUUCUGAUGCUCU 3'

query 3' GCGUGUCGAAGACUACGAGU 5'  
query=miR6209, target=R03G\_06719, score=0, range=160-179, strand=  
target 5' CGCACAGCUUCUGAUGCUCU 3'

query 3' GCGUGUCGAAGACUACGAGU 5'  
query=miR6209, target=R03G\_03989, score=0, range=160-179, strand=  
target 5' CGCACAGCUUCUGAUGCUCU 3'

query 3' GCGUGUCGAAGACUACGAGU 5'  
query=miR6209, target=R03G\_05934, score=0, range=160-179, strand=  
target 5' CGCACAGCUUCUGAUGCUCU 3'

query 3' GCGUGUCGAAGACUACGAGU 5'  
query=miR6209, target=R03G\_13702, score=0, range=160-179, strand=  
target 5' CGCACAGCUUCUGAUGCUCU 3'

query 3' GCGUGUCGAAGACUACGAGU 5'  
query=miR6209, target=R03G\_02701, score=0, range=193-212, strand=  
target 5' CGCACAGCUUCUGAUGCUCU 3'





query=miR6209, target=R03G\_12004, score=2, range=229-248, strand=  
target 5' CGCACAGAUUCUGAUGCUCU 3'  
::::: ::::::::::::::  
query 3' GCGUGUCGAAGACUACGAGU 5'  
query=miR6209, target=R03G\_09950, score=2, range=229-248, strand=  
target 5' CGCACAGAUUCUGAUGCUCU 3'  
::::: ::::::::::::::  
query 3' GCGUGUCGAAGACUACGAGU 5'  
query=miR6209, target=R03G\_10231, score=2, range=229-248, strand=  
target 5' CGCACAGAUUCUGAUGCUCU 3'  
::::: ::::::::::::::  
query 3' GCGUGUCGAAGACUACGAGU 5'  
query=miR6209, target=R03G\_12173, score=2, range=229-248, strand=  
target 5' CGCACAGAUUCUGAUGCUCU 3'  
::::: ::::::::::::::  
query 3' GCGUGUCGAAGACUACGAGU 5'  
query=miR6209, target=R03G\_16430, score=2, range=193-212, strand=  
target 5' CGCACAGAUUCUGAUGCUCU 3'  
::::: ::::::::::::::  
query 3' GCGUGUCGAAGACUACGAGU 5'  
query=miR6209, target=R03G\_05351, score=2, range=214-233, strand=  
target 5' CGCACAGAUUCUGAUGCUCU 3'  
::::: ::::::::::::::  
query 3' GCGUGUCGAAGACUACGAGU 5'  
query=miR6209, target=R03G\_01938, score=2, range=229-248, strand=  
target 5' CGCACAGAUUCUGAUGCUCU 3'  
::::: ::::::::::::::  
query 3' GCGUGUCGAAGACUACGAGU 5'  
query=miR6209, target=R03G\_07673, score=2, range=229-248, strand=  
target 5' CGCACAGCUUCUGACGCUCA 3'  
::::: ::::::::::::::  
query 3' GCGUGUCGAAGACUACGAGU 5'  
query=miR6209, target=R03G\_13754, score=2, range=229-248, strand=  
target 5' CGCACAGAUUCUGAUGCUCU 3'  
::::: ::::::::::::::  
query 3' GCGUGUCGAAGACUACGAGU 5'  
query=miR6209, target=R03G\_12672, score=2, range=229-248, strand=  
target 5' CGCACAGAUUCUGAUGCUCU 3'  
::::: ::::::::::::::  
query 3' GCGUGUCGAAGACUACGAGU 5'  
query=miR6209, target=R03G\_07859, score=2, range=124-143, strand=  
target 5' CGCACAGAUUCUGAUGCUCU 3'  
::::: ::::::::::::::  
query 3' GCGUGUCGAAGACUACGAGU 5'  
query=miR6209, target=R03G\_04128, score=3, range=229-248, strand=







target 5' CAGGAAAAAGUAACGUUGUA 3'  
:.....: :  
query 3' CUUCUUUUUUUAUUGCGACAU 5'  
query=miR9726, target=R03G\_08514, score=4, range=509-528, strand=  
target 5' GAAUGGAAAAUAACGCUGAA 3'  
::: ..: :  
query 3' CUUCUUUUUUUAUUGCGACAU 5'  
query=miR9726, target=R03G\_05586, score=4, range=253-271, strand=  
target 5' AAAGAAAAAAU-GCGCUGUA 3'  
:.....: .: :  
query 3' CUUCUUUUUUUAUUGCGACAU 5'  
query=miR9726, target=R03G\_17187, score=4, range=4771-4789, stran  
target 5' GAACAAGAAUAACGC-GUG 3'  
::: :.....: :.  
query 3' CUUCUUUUUUUAUUGCGACAU 5'  
query=miR9726, target=R03G\_09761, score=4, range=144-164, strand=  
target 5' AAAGUAAUAGUAACGCUGUA 3'  
::: :: :.....: :  
query 3' CUUC-UUUUUUAUUGCGACAU 5'  
query=miR6182, target=R03G\_07088, score=2.5, range=250-269, stran  
target 5' GACGCAUCCAUCACAGAGCA 3'  
......: : :  
query 3' UUGCGUAGGUAGUGUCUGGU 5'  
query=miR6182, target=R03G\_15997, score=3, range=110-128, strand=  
target 5' AACG-AACCAUCACAGACCU 3'  
:.... : :.....: :  
query 3' UUGCGUAGGUAGUGUCUGGU 5'  
query=miR6182, target=R03G\_15911, score=3.5, range=115-133, stran  
target 5' AACGCGUCCAUCACA-ACCU 3'  
:.....: : : :  
query 3' UUGCGUAGGUAGUGUCUGGU 5'  
query=miR6182, target=R03G\_15722, score=3.5, range=398-416, stran  
target 5' AGCUC-UCCAUCACGGACCA 3'  
:.. : :.....: :  
query 3' UUGCGUAGGUAGUGUCUGGU 5'  
query=miR6182, target=R03G\_05899, score=4, range=1244-1262, stran  
target 5' AAC-CAACCAUCACAGAACA 3'  
::: :: :.....: : :  
query 3' UUGCGUAGGUAGUGUCUGGU 5'  
query=miR6182, target=R03G\_13262, score=4, range=832-851, strand=  
target 5' AGCUCGUCCAUCAUAGACCC 3'  
:.. :.....: :  
query 3' UUGCGUAGGUAGUGUCUGGU 5'  
query=miR6182, target=R03G\_16215, score=4, range=1171-1189, stran  
target 5' AACG-AUCCAUCAUAGACUC 3'

:::: :::::::::::::::  
query 3' UUGCGUAGGUAGUGUCUGGU 5'  
query=miR8179, target=R03G\_13279, score=0, range=1928-1949, stran  
target 5' ACGAUCAAGUGAAUGCAGAUCA 3'  
:::: :::::::::::::::  
query 3' UGCUAGUUCACUUACGUCUAGU 5'  
query=miR8179, target=R03G\_17346, score=0, range=1835-1856, stran  
target 5' ACGAUCAAGUGAAUGCAGAUCA 3'  
:::: :::::::::::::::  
query 3' UGCUAGUUCACUUACGUCUAGU 5'  
query=miR8179, target=R03G\_17263, score=0, range=1085-1106, stran  
target 5' ACGAUCAAGUGAAUGCAGAUCA 3'  
:::: :::::::::::::::  
query 3' UGCUAGUUCACUUACGUCUAGU 5'  
query=miR8179, target=R03G\_10786, score=0, range=1076-1097, stran  
target 5' ACGAUCAAGUGAAUGCAGAUCA 3'  
:::: :::::::::::::::  
query 3' UGCUAGUUCACUUACGUCUAGU 5'  
query=miR8179, target=R03G\_14771, score=0, range=1028-1049, stran  
target 5' ACGAUCAAGUGAAUGCAGAUCA 3'  
:::: :::::::::::::::  
query 3' UGCUAGUUCACUUACGUCUAGU 5'  
query=miR8179, target=R03G\_15868, score=0, range=914-935, strand=  
target 5' ACGAUCAAGUGAAUGCAGAUCA 3'  
:::: :::::::::::::::  
query 3' UGCUAGUUCACUUACGUCUAGU 5'  
query=miR8179, target=R03G\_17419, score=0, range=914-935, strand=  
target 5' ACGAUCAAGUGAAUGCAGAUCA 3'  
:::: :::::::::::::::  
query 3' UGCUAGUUCACUUACGUCUAGU 5'  
query=miR8179, target=R03G\_03598, score=0, range=1076-1097, stran  
target 5' ACGAUCAAGUGAAUGCAGAUCA 3'  
:::: :::::::::::::::  
query 3' UGCUAGUUCACUUACGUCUAGU 5'  
query=miR8179, target=R03G\_09943, score=0, range=701-722, strand=  
target 5' ACGAUCAAGUGAAUGCAGAUCA 3'  
:::: :::::::::::::::  
query 3' UGCUAGUUCACUUACGUCUAGU 5'  
query=miR8179, target=R03G\_17312, score=0, range=515-536, strand=  
target 5' ACGAUCAAGUGAAUGCAGAUCA 3'  
:::: :::::::::::::::  
query 3' UGCUAGUUCACUUACGUCUAGU 5'  
query=miR8179, target=R03G\_12808, score=4, range=795-815, strand=  
target 5' AAGA-CAAGUGAAUGCAGAUAA 3'  
: : ::::::::::::::: :

query 3' UGCUAGUUCACUUACGUCUAGU 5'  
query=miR8179, target=R03G\_12345, score=4, range=2510-2532, stran  
target 5' CUUAUACAAGUGAAUGCAGAU CG 3'  
. :: :  
query 3' UGCUA-GUUCACUUACGUCUAGU 5'  
query=miR847-5p, target=R03G\_03516, score=0, range=645-663, stran  
target 5' UCCAUCCUCCUCAUCAAUA 3'  
:  
query 3' AGGUAGGAGGAGUAGUUUAU 5'  
query=miR847-5p, target=R03G\_16309, score=1.5, range=174-192,  
strand=-1  
target 5' GUCAUCCUCCUCAUCAAUA 3'  
:  
query 3' AGGUAGGAGGAGUAGUUUAU 5'  
query=miR847-5p, target=R03G\_00269, score=2, range=1221-1239,  
strand=-1  
target 5' UACAUCCUCUUCAUCAAUA 3'  
:  
query 3' AGGUAGGAGGAGUAGUUUAU 5'  
query=miR847-5p, target=R03G\_06561, score=2.5, range=432-449, str  
target 5' AUCA-CCUCCUCAUCAAUA 3'  
:  
query 3' AGGUAGGAGGAGUAGUUUAU 5'  
query=miR847-5p, target=R03G\_03142, score=2.5, range=2607-2625,  
strand=-1  
target 5' UCCAUUCUUCUUAUCAAUA 3'  
:  
query 3' AGGUAGGAGGAGUAGUUUAU 5'  
query=miR847-5p, target=R03G\_01295, score=2.5, range=168-186,  
strand=-1  
target 5' UUGAUCCUCUUCAUCAAUA 3'  
:  
query 3' AGGUAGGAGGAGUAGUUUAU 5'  
query=miR847-5p, target=R03G\_08083, score=3, range=380-398, stran  
target 5' UUCGUCCUCCUCGUCAAUU 3'  
:  
query 3' AGGUAGGAGGAGUAGUUUAU 5'  
query=miR847-5p, target=R03G\_13952, score=3, range=1370-1389, str  
target 5' UUCAUUCUCCUCAUCAAUA 3'  
:  
query 3' AGGUAGGAGGAGUAGUU-AU 5'  
query=miR847-5p, target=R03G\_08484, score=3, range=135-152, stran  
target 5' UCC-UCCUCCUCCUCAUCAAUA 3'  
:  
query 3' AGGUAGGAGGAGUAGUUUAU 5'

query=miR847-5p, target=R03G\_02989, score=3, range=453-470, stran  
target 5' UCC-UCCUCCUCAACAAUA 3'  
::: ::::::::::: :::::  
query 3' AGGUAGGAGGAGUAGUUUAU 5'  
query=miR847-5p, target=R03G\_08785, score=3, range=267-284, stran  
target 5' UCC-UCCUCCUCCUCAAAUA 3'  
::: ::::::::::: :::::  
query 3' AGGUAGGAGGAGUAGUUUAU 5'  
query=miR847-5p, target=R03G\_07261, score=3, range=1853-1871,  
strand=-1  
target 5' UUCAUUUUCUUCAUCAAUA 3'  
:.....: :::::  
query 3' AGGUAGGAGGAGUAGUUUAU 5'  
query=miR847-5p, target=R03G\_03755, score=3, range=72-90, strand=  
target 5' UUCGACCUCUUCAUCAAUA 3'  
:..: ::::::::::: :::::  
query 3' AGGUAGGAGGAGUAGUUUAU 5'  
query=miR847-5p, target=R03G\_08201, score=3, range=837-855, stran  
target 5' UCUUUUCUCUUCAUCAAUA 3'  
:..: ::::::::::: :::::  
query 3' AGGUAGGAGGAGUAGUUUAU 5'  
query=miR847-5p, target=R03G\_14338, score=3, range=1503-1522,  
strand=-1  
target 5' ACCAUCCUCCUCAUCAAUA 3'  
:.....: :::::  
query 3' AGGUAGG-AGGAGUAGUUUAU 5'  
query=miR847-5p, target=R03G\_04646, score=3, range=2874-2891,  
strand=-1  
target 5' UCC-UCUUCUUCAUCAAUA 3'  
::: ::::::::::: :::::  
query 3' AGGUAGGAGGAGUAGUUUAU 5'  
query=miR847-5p, target=R03G\_02104, score=3.5, range=719-737, str  
target 5' GCUAUCCUCUUUAUCAAUA 3'  
:.....: :::::  
query 3' AGGUAGGAGGAGUAGUUUAU 5'  
query=miR847-5p, target=R03G\_13827, score=3.5, range=1908-1926,  
strand=1  
target 5' UUCAUCCUCCUCAUCCAUA 3'  
:.....: :::  
query 3' AGGUAGGAGGAGUAGUUUAU 5'  
query=miR847-5p, target=R03G\_06547, score=3.5, range=506-523, str  
target 5' UCUAUCCUCCUUA-CAAUA 3'  
:.....: :::::  
query 3' AGGUAGGAGGAGUAGUUUAU 5'  
query=miR847-5p, target=R03G\_15183, score=3.5, range=97-115, stra





.....  
query 3' AGGUAGGAGGAGUAGUUAU 5'  
query=miR847-5p, target=R03G\_01696, score=4, range=993-1011, strand  
target 5' UCCGUUCUCUUCUCAAUA 3'  
.....  
query 3' AGGUAGGAGGAGUAGUUAU 5'  
query=miR847-5p, target=R03G\_11807, score=4, range=89-108, strand  
target 5' UCCAUUCUCUUCAUCAAUG 3'  
.....  
query 3' AGGUAGGAGGAGUAG-UUAU 5'  
query=miR847-5p, target=R03G\_12917, score=4, range=1002-1020,  
strand=-1  
target 5' UUCAUUAUCUUCAUCAAUA 3'  
.....  
query 3' AGGUAGGAGGAGUAGUUAU 5'  
query=miR847-5p, target=R03G\_00050, score=4, range=84-102, strand  
target 5' UUCAUUCUCCUUAUCAACA 3'  
.....  
query 3' AGGUAGGAGGAGUAGUUAU 5'  
query=miR847-5p, target=R03G\_15129, score=4, range=171-189, strand  
target 5' UUCAUUCUCUUCAUCCAUA 3'  
.....  
query 3' AGGUAGGAGGAGUAGUUAU 5'  
query=miR847-5p, target=R03G\_12552, score=4, range=222-240, strand  
target 5' UCCACCCUUUUUAUCAAUA 3'  
.....  
query 3' AGGUAGGAGGAGUAGUUAU 5'  
query=miR847-5p, target=R03G\_14552, score=4, range=147-165, strand  
target 5' UCUUCCUCUUCGUCAAUG 3'  
.....  
query 3' AGGUAGGAGGAGUAGUUAU 5'  
query=miR847-5p, target=R03G\_05342, score=4, range=147-165, strand  
target 5' UCUUCCUCUUCGUCAAUG 3'  
.....  
query 3' AGGUAGGAGGAGUAGUUAU 5'  
query=miR847-5p, target=R03G\_16368, score=4, range=147-165, strand  
target 5' UCUUCCUCUUCGUCAAUG 3'  
.....  
query 3' AGGUAGGAGGAGUAGUUAU 5'  
query=miR847-5p, target=R03G\_12077, score=4, range=219-237, strand  
target 5' UCUUCCUCUUCGUCAAUG 3'  
.....  
query 3' AGGUAGGAGGAGUAGUUAU 5'  
query=miR847-5p, target=R03G\_17393, score=4, range=219-237, strand  
target 5' UCUUCCUCUUCGUCAAUG 3'

```
... :::::::::::::::
query 3' AGGUAGGAGGAGUAGUUAU 5'
query=miR847-5p, target=R03G_07693, score=4, range=147-165, stran
target 5' UCUUCCUCUUCGUCAAUG 3'
... :::::::::::::::
query 3' AGGUAGGAGGAGUAGUUAU 5'
query=miR847-5p, target=R03G_07978, score=4, range=147-165, stran
target 5' UCUUCCUCUUCGUCAAUG 3'
... :::::::::::::::
query 3' AGGUAGGAGGAGUAGUUAU 5'
query=miR847-5p, target=R03G_16899, score=4, range=147-165, stran
target 5' UCUUCCUCUUCGUCAAUG 3'
... :::::::::::::::
query 3' AGGUAGGAGGAGUAGUUAU 5'
query=miR847-5p, target=R03G_10518, score=4, range=147-165, stran
target 5' UCUUCCUCUUCGUCAAUG 3'
... :::::::::::::::
query 3' AGGUAGGAGGAGUAGUUAU 5'
query=miR847-5p, target=R03G_12012, score=4, range=147-165, stran
target 5' UCUUCCUCUUCGUCAAUG 3'
... :::::::::::::::
query 3' AGGUAGGAGGAGUAGUUAU 5'
query=miR847-5p, target=R03G_09492, score=4, range=147-165, stran
target 5' UCUUCCUCUUCGUCAAUG 3'
... :::::::::::::::
query 3' AGGUAGGAGGAGUAGUUAU 5'
query=miR847-5p, target=R03G_09454, score=4, range=6057-6075,
strand=-1
target 5' GCCAUCUUCAUCAUCAAUA 3'
.....: :::::::::::::::
query 3' AGGUAGGAGGAGUAGUUAU 5'
query=miR847-5p, target=R03G_02202, score=4, range=804-822, stran
target 5' ACCAUCCUCUUCAUCACUA 3'
.....: ::
query 3' AGGUAGGAGGAGUAGUUAU 5'
query=miR847-5p, target=R03G_06990, score=4, range=762-780, stran
target 5' GCCAUCCUCCUCAUCAGAA 3'
.....:
query 3' AGGUAGGAGGAGUAGUUAU 5'
query=miR847-5p, target=R03G_00272, score=4, range=1479-1497,
strand=-1
target 5' GUCAUCCUCAUCAUCAAUG 3'
.....:
query 3' AGGUAGGAGGAGUAGUUAU 5'
query=miR847-5p, target=R03G_11024, score=4, range=432-450, stran
```



query=miR847-5p, target=R03G\_15749, score=4, range=630-648, stran  
target 5' UGCCUCCUUUUCAUCAUA 3'  
: : :::::::::::::::  
query 3' AGGUAGGAGGAGUAGUUUAU 5'  
query=miR847-5p, target=R03G\_14129, score=4, range=637-656, stran  
target 5' UUCUUCUCCUCAUCAGUA 3'  
::: ::::::::::::::: :::  
query 3' AGGUAGGAGGAGUAGU-UAU 5'  
query=miR847-5p, target=R03G\_06649, score=4, range=2271-2288,  
strand=-1  
target 5' UCCAU-CUUUUCAUCAUC 3'  
::::: :::::::::::::::  
query 3' AGGUAGGAGGAGUAGUUUAU 5'  
query=miR5387a, target=R03G\_17217, score=1, range=142-163, strand  
target 5' GAUACCGUAGACCGGCGUGUUA 3'  
::::: :::::::::::::::  
query 3' CUAUGACAUCUGGCCGCACAAU 5'  
query=miR5387a, target=R03G\_07862, score=2, range=1558-1579, stra  
target 5' GAUACCGUCGACCGGCGUGUUA 3'  
::::: :: :::::::::::::::  
query 3' CUAUGACAUCUGGCCGCACAAU 5'  
query=miR5387a, target=R03G\_10744, score=2, range=1444-1465, stra  
target 5' GAUACCGUCGACCGGCGUGUUA 3'  
::::: :: :::::::::::::::  
query 3' CUAUGACAUCUGGCCGCACAAU 5'  
query=miR5387a, target=R03G\_16366, score=2, range=1444-1465, stra  
target 5' GAUACCGUCGACCGGCGUGUUA 3'  
::::: :: :::::::::::::::  
query 3' CUAUGACAUCUGGCCGCACAAU 5'  
query=miR5387a, target=R03G\_17255, score=2, range=1414-1435, stra  
target 5' GAUACCGUCGACCGGCGUGUUA 3'  
::::: :: :::::::::::::::  
query 3' CUAUGACAUCUGGCCGCACAAU 5'  
query=miR5387a, target=R03G\_07735, score=2, range=1363-1384, stra  
target 5' GAUACCGUCGACCGGCGUGUUA 3'  
::::: :: :::::::::::::::  
query 3' CUAUGACAUCUGGCCGCACAAU 5'  
query=miR5387a, target=R03G\_11979, score=2, range=1417-1438, stra  
target 5' GAUACCGUCGACCGGCGUGUUA 3'  
::::: :: :::::::::::::::  
query 3' CUAUGACAUCUGGCCGCACAAU 5'  
query=miR5387a, target=R03G\_13448, score=2, range=1429-1450, stra  
target 5' GAUACCGUCGACCGGCGUGUUA 3'  
::::: :: :::::::::::::::  
query 3' CUAUGACAUCUGGCCGCACAAU 5'



target 5' UUGGUCUGCAAGGCAUCGCAA 3'  
:::::.....  
query 3' AACUGACGUUCUGUAGCGUU 5'  
query=miR775, target=R03G\_04104, score=2, range=103-122, strand=1  
target 5' UUGACUGCAAGGCAUCGUAA 3'  
:::::.....  
query 3' AACUGACGUUCUGUAGCGUU 5'  
query=miR775, target=R03G\_04110, score=2, range=103-122, strand=1  
target 5' UUGACUGCAAGGCAUCGUAA 3'  
:::::.....  
query 3' AACUGACGUUCUGUAGCGUU 5'  
query=miR775, target=R03G\_08301, score=2, range=331-350, strand=1  
target 5' UUGACUGCAAGACACCGCAA 3'  
:::::.....  
query 3' AACUGACGUUCUGUAGCGUU 5'  
query=miR775, target=R03G\_16429, score=2, range=118-137, strand=1  
target 5' UUGACUGCAAGACACCGCAA 3'  
:::::.....  
query 3' AACUGACGUUCUGUAGCGUU 5'  
query=miR775, target=R03G\_02348, score=2, range=118-137, strand=1  
target 5' UUGACUGCAAGACACCGCAA 3'  
:::::.....  
query 3' AACUGACGUUCUGUAGCGUU 5'  
query=miR775, target=R03G\_13903, score=2, range=406-425, strand=1  
target 5' UUGACUGCAAGACACCGCAA 3'  
:::::.....  
query 3' AACUGACGUUCUGUAGCGUU 5'  
query=miR775, target=R03G\_14722, score=2, range=406-425, strand=1  
target 5' UUGACUGCAAGACACCGCAA 3'  
:::::.....  
query 3' AACUGACGUUCUGUAGCGUU 5'  
query=miR775, target=R03G\_08906, score=2, range=406-425, strand=1  
target 5' UUGACUGCAAGACACCGCAA 3'  
:::::.....  
query 3' AACUGACGUUCUGUAGCGUU 5'  
query=miR775, target=R03G\_13664, score=2, range=406-425, strand=1  
target 5' UUGACUGCAAGACACCGCAA 3'  
:::::.....  
query 3' AACUGACGUUCUGUAGCGUU 5'  
query=miR775, target=R03G\_05133, score=2, range=355-374, strand=1  
target 5' UUGACUGCAAGACACCGCAA 3'  
:::::.....  
query 3' AACUGACGUUCUGUAGCGUU 5'  
query=miR775, target=R03G\_05303, score=2, range=406-425, strand=1  
target 5' UUGACUGCAAGACACCGCAA 3'

query 3' AACUGACGUUCUGUAGCGUU 5'  
query=miR775, target=R03G\_05181, score=2, range=406-425, strand=1  
target 5' UUGACUGCAAGACACCGCAA 3'

query 3' AACUGACGUUCUGUAGCGUU 5'  
query=miR775, target=R03G\_05194, score=2, range=406-425, strand=1  
target 5' UUGACUGCAAGACACCGCAA 3'

query 3' AACUGACGUUCUGUAGCGUU 5'  
query=miR775, target=R03G\_13672, score=2, range=406-425, strand=1  
target 5' UUGACUGCAAGACACCGCAA 3'

query 3' AACUGACGUUCUGUAGCGUU 5'  
query=miR775, target=R03G\_02354, score=2, range=406-425, strand=1  
target 5' UUGACUGCAAGACACCGCAA 3'

query 3' AACUGACGUUCUGUAGCGUU 5'  
query=miR775, target=R03G\_07580, score=2, range=130-149, strand=1  
target 5' UUGACUGCAAGACACCGCAA 3'

query 3' AACUGACGUUCUGUAGCGUU 5'  
query=miR775, target=R03G\_11567, score=2, range=1258-1277, strand=1  
target 5' UUGACUGCAAGACACCGCAA 3'

query 3' AACUGACGUUCUGUAGCGUU 5'  
query=miR775, target=R03G\_07788, score=2, range=355-374, strand=1  
target 5' UUGACUGCAAGACACCGCAA 3'

query 3' AACUGACGUUCUGUAGCGUU 5'  
query=miR775, target=R03G\_01636, score=2, range=355-374, strand=1  
target 5' UUGACUGCAAGACACCGCAA 3'

query 3' AACUGACGUUCUGUAGCGUU 5'  
query=miR775, target=R03G\_01545, score=2, range=370-389, strand=1  
target 5' UUGACUGCAAGACACCGCAA 3'

query 3' AACUGACGUUCUGUAGCGUU 5'  
query=miR775, target=R03G\_14467, score=3, range=103-122, strand=1  
target 5' UUGACUGCAAGGCACCGCAA 3'

query 3' AACUGACGUUCUGUAGCGUU 5'  
query=miR775, target=R03G\_14806, score=3, range=313-332, strand=1  
target 5' UUGACUGCAAGACGCCGCAA 3'



query 3' AACUGACGUUCUGUAGCGUU 5'  
query=miR775, target=R03G\_07438, score=3, range=103-122, strand=1  
target 5' UUGACUGCAAGGCACCGCAA 3'  
.....  
query 3' AACUGACGUUCUGUAGCGUU 5'  
query=miR775, target=R03G\_09279, score=3, range=172-191, strand=1  
target 5' CUGACUGCAAGACACCGCAA 3'  
.....  
query 3' AACUGACGUUCUGUAGCGUU 5'  
query=miR775, target=R03G\_14365, score=3, range=298-317, strand=1  
target 5' UUGACCGCAAGACACCGCAA 3'  
.....  
query 3' AACUGACGUUCUGUAGCGUU 5'  
query=miR775, target=R03G\_01923, score=3, range=355-374, strand=1  
target 5' UUGACUACAAGACACCGCAA 3'  
.....  
query 3' AACUGACGUUCUGUAGCGUU 5'  
query=miR775, target=R03G\_02936, score=3.5, range=406-425, strand  
target 5' UUGGCUGCAAGACACUGCAA 3'  
.....  
query 3' AACUGACGUUCUGUAGCGUU 5'  
query=miR775, target=R03G\_06838, score=4, range=49-68, strand=1  
target 5' GUGACUGCAAGGCACCGCAA 3'  
.....  
query 3' AACUGACGUUCUGUAGCGUU 5'  
query=miR775, target=R03G\_13574, score=4, range=184-203, strand=1  
target 5' UUGACUGCAAUACACCGCAA 3'  
.....  
query 3' AACUGACGUUCUGUAGCGUU 5'  
query=miR775, target=R03G\_08649, score=4, range=133-152, strand=1  
target 5' UUGACUACAAGGCACCGCAA 3'  
.....  
query 3' AACUGACGUUCUGUAGCGUU 5'  
query=miR775, target=R03G\_09608, score=4, range=739-758, strand=1  
target 5' UUUAAUGCAAGACAUCGUGA 3'  
:: : .....

query 3' AACUGACGUUCUGUAGCGUU 5'  
query=miR775, target=R03G\_12158, score=4, range=29-47, strand=1  
target 5' UUGACUACAAGAUAU-GCAA 3'  
.....  
query 3' AACUGACGUUCUGUAGCGUU 5'  
query=miR775, target=R03G\_05218, score=4, range=410-428, strand=1  
target 5' UUAAC-GCAAGACAUCGUGA 3'  
:: : .....

query 3' AACUGACGUUCUGUAGCGUU 5'



query 3' UAAAACGCAAGGUUGAGUCG 5'  
query=miR9557-3p, target=R03G\_03846, score=4, range=637-656, strand=  
target 5' AUCAUACGUUCCAAUUCAGC 3'  
:: : ::::::::::::::::::::  
query 3' UAAAACGCAAGGUUGAGUCG 5'  
query=miR9557-3p, target=R03G\_07434, score=4, range=37-55, strand=  
target 5' AUUGU-CGUUCCAAUUCAGG 3'  
::: : ::::::::::::::::::::  
query 3' UAAAACGCAAGGUUGAGUCG 5'  
query=miR167d, target=R03G\_13498, score=3, range=394-414, strand=  
target 5' GGAUCCGUGUUGGCAGCUUCA 3'  
.::: :.:::.....  
query 3' UCUA-GUACGACCGUCGAAGU 5'  
query=miR167d, target=R03G\_02881, score=3, range=10143-10163,  
strand=-1  
target 5' AGAUAAUGGCUGGCAGCUUCC 3'  
::: : ::::::::::::::::::::  
query 3' UCUAGUA-CGACCGUCGAAGU 5'  
query=miR167d, target=R03G\_16597, score=3.5, range=342-361, strand=  
target 5' GGGUCAUGCUGGCCGCUUCG 3'  
.:::..... : :::.  
query 3' UCUAGUACGACCGUCGAAGU 5'  
query=miR167d, target=R03G\_01139, score=4, range=492-510, strand=  
target 5' GGAU-AUGCUGGCUGCUUCG 3'  
.::: : :::..... : :::.  
query 3' UCUAGUACGACCGUCGAAGU 5'  
query=miR167d, target=R03G\_02577, score=4, range=573-591, strand=  
target 5' UGA-CUUGCUGGCAGUUUCA 3'  
:: : ::::::::::::::::::::  
query 3' UCUAGUACGACCGUCGAAGU 5'  
query=miR5678, target=R03G\_05622, score=0, range=475-494, strand=  
target 5' GGAAAGUCUUAUGCAUGGAA 3'  
: :::..... : :::.  
query 3' CCUUUCAGAAUACGUACCUU 5'  
query=miR5678, target=R03G\_08846, score=0, range=475-494, strand=  
target 5' GGAAAGUCUUAUGCAUGGAA 3'  
: :::..... : :::.  
query 3' CCUUUCAGAAUACGUACCUU 5'  
query=miR5678, target=R03G\_13848, score=0, range=475-494, strand=  
target 5' GGAAAGUCUUAUGCAUGGAA 3'  
: :::..... : :::.  
query 3' CCUUUCAGAAUACGUACCUU 5'  
query=miR5678, target=R03G\_05635, score=0, range=475-494, strand=  
target 5' GGAAAGUCUUAUGCAUGGAA 3'  
: :::..... : :::.

query 3' CCUUUCAGAAUACGUACCUU 5'  
query=miR5678, target=R03G\_03571, score=0, range=475-494, strand=  
target 5' GGAAAGUCUUAUGCAUGGAA 3'  
.....  
query 3' CCUUUCAGAAUACGUACCUU 5'  
query=miR5678, target=R03G\_01652, score=0, range=475-494, strand=  
target 5' GGAAAGUCUUAUGCAUGGAA 3'  
.....  
query 3' CCUUUCAGAAUACGUACCUU 5'  
query=miR5678, target=R03G\_09607, score=0, range=475-494, strand=  
target 5' GGAAAGUCUUAUGCAUGGAA 3'  
.....  
query 3' CCUUUCAGAAUACGUACCUU 5'  
query=miR5678, target=R03G\_11401, score=0.5, range=475-494, stran  
target 5' GGGAAGUCUUAUGCAUGGAA 3'  
.....  
query 3' CCUUUCAGAAUACGUACCUU 5'  
query=miR5678, target=R03G\_09483, score=0.5, range=475-494, stran  
target 5' GGGAAGUCUUAUGCAUGGAA 3'  
.....  
query 3' CCUUUCAGAAUACGUACCUU 5'  
query=miR5678, target=R03G\_00681, score=0.5, range=475-494, stran  
target 5' GGGAAGUCUUAUGCAUGGAA 3'  
.....  
query 3' CCUUUCAGAAUACGUACCUU 5'  
query=miR5678, target=R03G\_09499, score=0.5, range=475-494, stran  
target 5' GGGAAGUCUUAUGCAUGGAA 3'  
.....  
query 3' CCUUUCAGAAUACGUACCUU 5'  
query=miR5678, target=R03G\_07303, score=0.5, range=475-494, stran  
target 5' GGGAAGUCUUAUGCAUGGAA 3'  
.....  
query 3' CCUUUCAGAAUACGUACCUU 5'  
query=miR5678, target=R03G\_09544, score=0.5, range=475-494, stran  
target 5' GGGAAGUCUUAUGCAUGGAA 3'  
.....  
query 3' CCUUUCAGAAUACGUACCUU 5'  
query=miR5678, target=R03G\_07875, score=0.5, range=475-494, stran  
target 5' GGGAAGUCUUAUGCAUGGAA 3'  
.....  
query 3' CCUUUCAGAAUACGUACCUU 5'  
query=miR5678, target=R03G\_05336, score=0.5, range=475-494, stran  
target 5' GGGAAGUCUUAUGCAUGGAA 3'  
.....  
query 3' CCUUUCAGAAUACGUACCUU 5'

query=miR5678, target=R03G\_17382, score=0.5, range=475-494, stran  
target 5' GGGAAGUCUUAUGCAUGGAA 3'  
.....  
query 3' CCUUUCAGAAUACGUACCUU 5'  
query=miR5678, target=R03G\_06423, score=0.5, range=529-548, stran  
target 5' GGGAAGUCUUAUGCAUGGAA 3'  
.....  
query 3' CCUUUCAGAAUACGUACCUU 5'  
query=miR5678, target=R03G\_16807, score=0.5, range=475-494, stran  
target 5' GGGAAGUCUUAUGCAUGGAA 3'  
.....  
query 3' CCUUUCAGAAUACGUACCUU 5'  
query=miR5678, target=R03G\_02689, score=0.5, range=475-494, stran  
target 5' GGGAAGUCUUAUGCAUGGAA 3'  
.....  
query 3' CCUUUCAGAAUACGUACCUU 5'  
query=miR5678, target=R03G\_10732, score=0.5, range=475-494, stran  
target 5' GGGAAGUCUUAUGCAUGGAA 3'  
.....  
query 3' CCUUUCAGAAUACGUACCUU 5'  
query=miR5678, target=R03G\_14359, score=0.5, range=475-494, stran  
target 5' GGGAAGUCUUAUGCAUGGAA 3'  
.....  
query 3' CCUUUCAGAAUACGUACCUU 5'  
query=miR5678, target=R03G\_06441, score=0.5, range=475-494, stran  
target 5' GGGAAGUCUUAUGCAUGGAA 3'  
.....  
query 3' CCUUUCAGAAUACGUACCUU 5'  
query=miR5678, target=R03G\_15675, score=0.5, range=475-494, stran  
target 5' GGGAAGUCUUAUGCAUGGAA 3'  
.....  
query 3' CCUUUCAGAAUACGUACCUU 5'  
query=miR5678, target=R03G\_10235, score=0.5, range=475-494, stran  
target 5' GGGAAGUCUUAUGCAUGGAA 3'  
.....  
query 3' CCUUUCAGAAUACGUACCUU 5'  
query=miR5678, target=R03G\_17400, score=0.5, range=349-368, stran  
target 5' GGGAAGUCUUAUGCAUGGAA 3'  
.....  
query 3' CCUUUCAGAAUACGUACCUU 5'  
query=miR5678, target=R03G\_01730, score=0.5, range=475-494, stran  
target 5' GGGAAGUCUUAUGCAUGGAA 3'  
.....  
query 3' CCUUUCAGAAUACGUACCUU 5'  
query=miR5678, target=R03G\_05915, score=0.5, range=475-494, stran



::::: ::::::::::::::  
query 3' CCUUUCAGAAUACGUACCUU 5'  
query=miR5678, target=R03G\_02822, score=1, range=475-494, strand=  
target 5' GGAAAGGCUUAUGCAUGGAA 3'  
::::: ::::::::::::::  
query 3' CCUUUCAGAAUACGUACCUU 5'  
query=miR5678, target=R03G\_15141, score=1, range=475-494, strand=  
target 5' GGAAAGGCUUAUGCAUGGAA 3'  
::::: ::::::::::::::  
query 3' CCUUUCAGAAUACGUACCUU 5'  
query=miR5678, target=R03G\_09168, score=1, range=475-494, strand=  
target 5' GGAAAGGCUUAUGCAUGGAA 3'  
::::: ::::::::::::::  
query 3' CCUUUCAGAAUACGUACCUU 5'  
query=miR5678, target=R03G\_10762, score=1, range=475-494, strand=  
target 5' GGAAAGGCUUAUGCAUGGAA 3'  
::::: ::::::::::::::  
query 3' CCUUUCAGAAUACGUACCUU 5'  
query=miR5678, target=R03G\_13151, score=1.5, range=475-494, stran  
target 5' AGGAAGUCUUAUGCAUGGAA 3'  
::::::::::::::::::::  
query 3' CCUUUCAGAAUACGUACCUU 5'  
query=miR5678, target=R03G\_01956, score=1.5, range=475-494, stran  
target 5' GGAAGCCUUAUGCAUGGAA 3'  
::::: ::::::::::::::  
query 3' CCUUUCAGAAUACGUACCUU 5'  
query=miR5678, target=R03G\_17285, score=1.5, range=475-494, stran  
target 5' GGAAGCCUUAUGCAUGGAA 3'  
::::: ::::::::::::::  
query 3' CCUUUCAGAAUACGUACCUU 5'  
query=miR5678, target=R03G\_03615, score=1.5, range=475-494, stran  
target 5' GGAAGACUUAUGCAUGGAA 3'  
::::: ::::::::::::::  
query 3' CCUUUCAGAAUACGUACCUU 5'  
query=miR5678, target=R03G\_00304, score=2, range=475-494, strand=  
target 5' AGAAAGGCUUAUGCAUGGAA 3'  
::::: ::::::::::::::  
query 3' CCUUUCAGAAUACGUACCUU 5'  
query=miR5678, target=R03G\_02713, score=2, range=205-224, strand=  
target 5' AGAAAGGCUUAUGCAUGGAA 3'  
::::: ::::::::::::::  
query 3' CCUUUCAGAAUACGUACCUU 5'  
query=miR5678, target=R03G\_16729, score=2, range=343-362, strand=  
target 5' AGAAAGGCUUAUGCAUGGAA 3'  
::::: ::::::::::::::







target 5' GGUAAGGUUUUAUGCAUGGAA 3'  
:: ::: .:~::~:  
query 3' CCUUUCAGAAUACGUACCUU 5'  
query=miR5678, target=R03G\_10763, score=3, range=475-494, strand=  
target 5' GGUAAGCUUUUAUGCAUGGAA 3'  
:: ::: .:~::~:  
query 3' CCUUUCAGAAUACGUACCUU 5'  
query=miR5678, target=R03G\_08115, score=3, range=179-197, strand=  
target 5' CUAAG-CUUAUGCAUGGAA 3'  
:::: ~::~:  
query 3' CCUUUCAGAAUACGUACCUU 5'  
query=miR5678, target=R03G\_11281, score=4, range=429-449, strand=  
target 5' UGAUAAGGUUUUAUGCAUGGAA 3'  
:: ::: .:~::~:  
query 3' CCU-UUCAGAAUACGUACCUU 5'  
query=miR5678, target=R03G\_02063, score=4, range=352-370, strand=  
target 5' GAAAAGUUUUUAUG-AUGGAA 3'  
: ~::~:  
query 3' CCUUUCAGAAUACGUACCUU 5'  
query=miR5261, target=R03G\_07863, score=0, range=932-952, strand=  
target 5' AGACCAAAGCAUCUGACAUGA 3'  
~::~:  
query 3' UCUGGUUUCGUAGACUGUACU 5'  
query=miR5261, target=R03G\_17254, score=0, range=932-952, strand=  
target 5' AGACCAAAGCAUCUGACAUGA 3'  
~::~:  
query 3' UCUGGUUUCGUAGACUGUACU 5'  
query=miR5261, target=R03G\_10748, score=0, range=932-952, strand=  
target 5' AGACCAAAGCAUCUGACAUGA 3'  
~::~:  
query 3' UCUGGUUUCGUAGACUGUACU 5'  
query=miR5261, target=R03G\_07861, score=0, range=932-952, strand=  
target 5' AGACCAAAGCAUCUGACAUGA 3'  
~::~:  
query 3' UCUGGUUUCGUAGACUGUACU 5'  
query=miR5261, target=R03G\_17201, score=0, range=929-949, strand=  
target 5' AGACCAAAGCAUCUGACAUGA 3'  
~::~:  
query 3' UCUGGUUUCGUAGACUGUACU 5'  
query=miR5261, target=R03G\_16903, score=0, range=866-886, strand=  
target 5' AGACCAAAGCAUCUGACAUGA 3'  
~::~:  
query 3' UCUGGUUUCGUAGACUGUACU 5'  
query=miR5261, target=R03G\_16358, score=0, range=761-781, strand=  
target 5' AGACCAAAGCAUCUGACAUGA 3'

query 3' UCUGGUUUCGUAGACUGUACU 5'  
query=miR5261, target=R03G\_11978, score=0.5, range=785-805, stran  
target 5' AGACCGAAGCAUCUGACAUGA 3'

query 3' UCUGGUUUCGUAGACUGUACU 5'  
query=miR5261, target=R03G\_13449, score=2, range=932-952, strand=  
target 5' AGACCAAAGCAUCUGACAUA 3'

query 3' UCUGGUUUCGUAGACUGUACU 5'  
query=miR5261, target=R03G\_16365, score=2, range=932-952, strand=  
target 5' AGACCAAAGCAUCUAACAUGA 3'

query 3' UCUGGUUUCGUAGACUGUACU 5'  
query=miR5261, target=R03G\_07736, score=2, range=932-952, strand=  
target 5' AGACCAAAGCAUCUGACAUA 3'

query 3' UCUGGUUUCGUAGACUGUACU 5'  
query=miR5261, target=R03G\_17250, score=2, range=932-952, strand=  
target 5' AGACCAAAGCAUCUGACAUA 3'

query 3' UCUGGUUUCGUAGACUGUACU 5'  
query=miR5261, target=R03G\_10533, score=2, range=932-952, strand=  
target 5' AGACCAAAGCAUCUGACAUA 3'

query 3' UCUGGUUUCGUAGACUGUACU 5'  
query=miR5261, target=R03G\_06414, score=2, range=929-949, strand=  
target 5' AGACCAAAGCAUCUGACAUA 3'

query 3' UCUGGUUUCGUAGACUGUACU 5'  
query=miR5261, target=R03G\_09174, score=2, range=929-949, strand=  
target 5' AGACCAAAGCAUCUGACAUA 3'

query 3' UCUGGUUUCGUAGACUGUACU 5'  
query=miR5261, target=R03G\_10538, score=2, range=890-910, strand=  
target 5' AGACCAAAGCAUCUGACAUA 3'

query 3' UCUGGUUUCGUAGACUGUACU 5'  
query=miR5261, target=R03G\_17220, score=4, range=938-958, strand=  
target 5' AGACCAAAGCAUCCGACAUA 3'

query 3' UCUGGUUUCGUAGACUGUACU 5'  
query=miR5261, target=R03G\_12967, score=4, range=932-952, strand=  
target 5' AGACCAAAGCAUCCGACAUA 3'



query=miR8658, target=R03G\_01139, score=4, range=721-741, strand=  
target 5' AUCUUCACUGUACUUUGUCAC 3'  
:: :: :::::::::::::::  
query 3' UACCAGAGACAUGAAACAGUU 5'  
query=miR2111, target=R03G\_04502, score=0, range=239-258, strand=  
target 5' CCAAACCCAAACACAGUUUA 3'  
:::::::::::::::::::  
query 3' GGUUUGGGUUUGUGUCAAAU 5'  
query=miR2111, target=R03G\_02942, score=0, range=239-258, strand=  
target 5' CCAAACCCAAACACAGUUUA 3'  
:::::::::::::::::::  
query 3' GGUUUGGGUUUGUGUCAAAU 5'  
query=miR2111, target=R03G\_01530, score=0, range=239-258, strand=  
target 5' CCAAACCCAAACACAGUUUA 3'  
:::::::::::::::::::  
query 3' GGUUUGGGUUUGUGUCAAAU 5'  
query=miR2111, target=R03G\_04017, score=0, range=239-258, strand=  
target 5' CCAAACCCAAACACAGUUUA 3'  
:::::::::::::::::::  
query 3' GGUUUGGGUUUGUGUCAAAU 5'  
query=miR2111, target=R03G\_03523, score=0, range=239-258, strand=  
target 5' CCAAACCCAAACACAGUUUA 3'  
:::::::::::::::::::  
query 3' GGUUUGGGUUUGUGUCAAAU 5'  
query=miR2111, target=R03G\_12446, score=0, range=239-258, strand=  
target 5' CCAAACCCAAACACAGUUUA 3'  
:::::::::::::::::::  
query 3' GGUUUGGGUUUGUGUCAAAU 5'  
query=miR2111, target=R03G\_15497, score=0, range=167-186, strand=  
target 5' CCAAACCCAAACACAGUUUA 3'  
:::::::::::::::::::  
query 3' GGUUUGGGUUUGUGUCAAAU 5'  
query=miR2111, target=R03G\_05724, score=0, range=200-219, strand=  
target 5' CCAAACCCAAACACAGUUUA 3'  
:::::::::::::::::::  
query 3' GGUUUGGGUUUGUGUCAAAU 5'  
query=miR2111, target=R03G\_15290, score=0, range=167-186, strand=  
target 5' CCAAACCCAAACACAGUUUA 3'  
:::::::::::::::::::  
query 3' GGUUUGGGUUUGUGUCAAAU 5'  
query=miR2111, target=R03G\_09087, score=0.5, range=239-258, stran  
target 5' UCAAACCCAAACACAGUUUA 3'  
.:::::::::::::::::::  
query 3' GGUUUGGGUUUGUGUCAAAU 5'  
query=miR2111, target=R03G\_10657, score=0.5, range=239-258, stran



.....  
query 3' GGUUUGGGUUUGUGUCAAAU 5'  
query=miR2111, target=R03G\_00850, score=4, range=165-184, strand=  
target 5' UCCAACUCAACCACAGUUUA 3'  
. : .....  
query 3' GGUUUGGGUUUGUGUCAAAU 5'  
query=miR2111, target=R03G\_08461, score=4, range=423-443, strand=  
target 5' UCAAAUCACAAACACAGGUUA 3'  
. : ..... : : :  
query 3' GGUUUGG-GUUUGUGUCAAAU 5'  
query=miR2111, target=R03G\_10271, score=4, range=910-929, strand=  
target 5' AUUUUAUCCAAACACAGUUUA 3'  
. : .....  
query 3' GGUUUGGGUUUGUGUCAAAU 5'  
query=miR2111, target=R03G\_09085, score=4, range=1804-1822, stran  
target 5' ACAGG-ACAAACACAGUUUA 3'  
: : : .....  
query 3' GGUUUGGGUUUGUGUCAAAU 5'  
query=miR2111, target=R03G\_00116, score=4, range=453-472, strand=  
target 5' CCAUAGGCAAACACAGUUUC 3'  
: : : : .....  
query 3' GGUUUGGGUUUGUGUCAAAU 5'  
query=miR7512, target=R03G\_16107, score=0, range=3015-3036, stran  
target 5' AUGGCAUAAGCUACAAGUAGUA 3'  
: : : .....  
query 3' UACCGUAUUCGAUGUUCAUCAU 5'  
query=miR7512, target=R03G\_03119, score=0, range=294-315, strand=  
target 5' AUGGCAUAAGCUACAAGUAGUA 3'  
: : : .....  
query 3' UACCGUAUUCGAUGUUCAUCAU 5'  
query=miR7817a, target=R03G\_12527, score=0, range=4341-4363, stra  
target 5' UUCUCGAGACAAGUUCAACCAAA 3'  
: : : .....  
query 3' AAGAGCUCUGUUCAAGUUGGUUU 5'  
query=miR7817a, target=R03G\_13918, score=0, range=4341-4363, stra  
target 5' UUCUCGAGACAAGUUCAACCAAA 3'  
: : : .....  
query 3' AAGAGCUCUGUUCAAGUUGGUUU 5'  
query=miR7817a, target=R03G\_14347, score=0, range=4272-4294, stra  
target 5' UUCUCGAGACAAGUUCAACCAAA 3'  
: : : .....  
query 3' AAGAGCUCUGUUCAAGUUGGUUU 5'  
query=miR7817a, target=R03G\_01614, score=0, range=4182-4204, stra  
target 5' UUCUCGAGACAAGUUCAACCAAA 3'  
: : : .....

query 3' AAGAGCUCUGUUCAAGUUGGUUU 5'  
query=miR7817a, target=R03G\_16361, score=0, range=4176-4198, strand  
target 5' UUCUCGAGACAAGUUCAACCAAA 3'  
.....  
query 3' AAGAGCUCUGUUCAAGUUGGUUU 5'  
query=miR7817a, target=R03G\_04126, score=0, range=4335-4357, strand  
target 5' UUCUCGAGACAAGUUCAACCAAA 3'  
.....  
query 3' AAGAGCUCUGUUCAAGUUGGUUU 5'  
query=miR7817a, target=R03G\_09493, score=0, range=2889-2911, strand  
target 5' UUCUCGAGACAAGUUCAACCAAA 3'  
.....  
query 3' AAGAGCUCUGUUCAAGUUGGUUU 5'  
query=miR7817a, target=R03G\_17165, score=0, range=717-739, strand  
target 5' UUCUCGAGACAAGUUCAACCAAA 3'  
.....  
query 3' AAGAGCUCUGUUCAAGUUGGUUU 5'  
query=miR7817a, target=R03G\_00298, score=0, range=696-718, strand  
target 5' UUCUCGAGACAAGUUCAACCAAA 3'  
.....  
query 3' AAGAGCUCUGUUCAAGUUGGUUU 5'  
query=miR7817a, target=R03G\_12530, score=0, range=159-181, strand  
target 5' UUCUCGAGACAAGUUCAACCAAA 3'  
.....  
query 3' AAGAGCUCUGUUCAAGUUGGUUU 5'  
query=miR7817a, target=R03G\_03618, score=0, range=159-181, strand  
target 5' UUCUCGAGACAAGUUCAACCAAA 3'  
.....  
query 3' AAGAGCUCUGUUCAAGUUGGUUU 5'  
query=miR7817a, target=R03G\_08831, score=0, range=87-109, strand=  
target 5' UUCUCGAGACAAGUUCAACCAAA 3'  
.....  
query 3' AAGAGCUCUGUUCAAGUUGGUUU 5'  
query=miR7817a, target=R03G\_03765, score=1, range=159-181, strand  
target 5' UUCUCGAGACAAGUUCAAUCAAA 3'  
.....  
query 3' AAGAGCUCUGUUCAAGUUGGUUU 5'  
query=miR7817a, target=R03G\_16693, score=1, range=4341-4363, strand  
target 5' GUCUCGAGACAAGUUCAACCAAA 3'  
.....  
query 3' AAGAGCUCUGUUCAAGUUGGUUU 5'  
query=miR7817a, target=R03G\_16539, score=1, range=4233-4255, strand  
target 5' GUCUCGAGACAAGUUCAACCAAA 3'  
.....  
query 3' AAGAGCUCUGUUCAAGUUGGUUU 5'



query=miR7817a, target=R03G\_12538, score=1, range=4233-4255, str  
target 5' CUCUCGAGACAAGUUCAACCAAA 3'  
::::::::::::::::::::::::::  
query 3' AAGAGCUCUGUUCAAGUUGGUUU 5'  
query=miR7817a, target=R03G\_07311, score=1, range=4182-4204, str  
target 5' CUCUCGAGACAAGUUCAACCAAA 3'  
::::::::::::::::::::::::::  
query 3' AAGAGCUCUGUUCAAGUUGGUUU 5'  
query=miR7817a, target=R03G\_10804, score=1, range=4182-4204, str  
target 5' CUCUCGAGACAAGUUCAACCAAA 3'  
::::::::::::::::::::::::::  
query 3' AAGAGCUCUGUUCAAGUUGGUUU 5'  
query=miR7817a, target=R03G\_09547, score=1, range=4176-4198, str  
target 5' CUCUCGAGACAAGUUCAACCAAA 3'  
::::::::::::::::::::::::::  
query 3' AAGAGCUCUGUUCAAGUUGGUUU 5'  
query=miR7817a, target=R03G\_06425, score=1, range=4176-4198, str  
target 5' CUCUCGAGACAAGUUCAACCAAA 3'  
::::::::::::::::::::::::::  
query 3' AAGAGCUCUGUUCAAGUUGGUUU 5'  
query=miR7817a, target=R03G\_17021, score=1, range=4176-4198, str  
target 5' CUCUCGAGACAAGUUCAACCAAA 3'  
::::::::::::::::::::::::::  
query 3' AAGAGCUCUGUUCAAGUUGGUUU 5'  
query=miR7817a, target=R03G\_05330, score=1, range=4176-4198, str  
target 5' CUCUCGAGACAAGUUCAACCAAA 3'  
::::::::::::::::::::::::::  
query 3' AAGAGCUCUGUUCAAGUUGGUUU 5'  
query=miR7817a, target=R03G\_02704, score=1, range=4176-4198, str  
target 5' CUCUCGAGACAAGUUCAACCAAA 3'  
::::::::::::::::::::::::::  
query 3' AAGAGCUCUGUUCAAGUUGGUUU 5'  
query=miR7817a, target=R03G\_12677, score=1, range=4176-4198, str  
target 5' CUCUCGAGACAAGUUCAACCAAA 3'  
::::::::::::::::::::::::::  
query 3' AAGAGCUCUGUUCAAGUUGGUUU 5'  
query=miR7817a, target=R03G\_04933, score=1, range=4176-4198, str  
target 5' CUCUCGAGACAAGUUCAACCAAA 3'  
::::::::::::::::::::::::::  
query 3' AAGAGCUCUGUUCAAGUUGGUUU 5'  
query=miR7817a, target=R03G\_05344, score=1, range=4002-4024, str  
target 5' CUCUCGAGACAAGUUCAACCAAA 3'  
::::::::::::::::::::::::::  
query 3' AAGAGCUCUGUUCAAGUUGGUUU 5'  
query=miR7817a, target=R03G\_03778, score=1, range=4134-4156, str



: .:::: : ::::: .  
query 3' AAGAGCUCUGUUCAAGUUGGUUU 5'  
query=miR8581, target=R03G\_04697, score=0, range=944-965, strand=  
target 5' CAGUUGUCUACAAAAUUCUCUA 3'  
: ::::: .  
query 3' GUCAACAGAUGUUUUAAGAGAU 5'  
query=miR8581, target=R03G\_00004, score=3.5, range=122-142, stran  
target 5' UA-UUAUUUACAAAAUUCUCUG 3'  
. : :: : ::::: .  
query 3' GUCAACAGAUGUUUUAAGAGAU 5'  
query=miR170-5p, target=R03G\_04566, score=4, range=288-308, stran  
target 5' AUGUGUGAACCCAGGUCCAAUA 3'  
: : ::::: .  
query 3' GACUCACUUGGUCC-GGUUUAU 5'  
query=miR9761, target=R03G\_10527, score=1, range=208-229, strand=  
target 5' ACAAGCAUAUCCUGGUCCUUCA 3'  
: ::::: .  
query 3' UGUUCGUAUAGGACUAGGAAGU 5'  
query=miR9761, target=R03G\_05522, score=1, range=585-606, strand=  
target 5' ACAAGCAUAUCCUGGUCCUUCA 3'  
: ::::: .  
query 3' UGUUCGUAUAGGACUAGGAAGU 5'  
query=miR9761, target=R03G\_03112, score=1, range=585-606, strand=  
target 5' ACAAGCAUAUCCUGGUCCUUCA 3'  
: ::::: .  
query 3' UGUUCGUAUAGGACUAGGAAGU 5'  
query=miR9761, target=R03G\_00240, score=1, range=528-549, strand=  
target 5' ACAAGCAUAUCCUGGUCCUUCA 3'  
: ::::: .  
query 3' UGUUCGUAUAGGACUAGGAAGU 5'  
query=miR9761, target=R03G\_02227, score=1, range=585-606, strand=  
target 5' ACAAGCAUAUCCUGGUCCUUCA 3'  
: ::::: .  
query 3' UGUUCGUAUAGGACUAGGAAGU 5'  
query=miR9761, target=R03G\_14784, score=1, range=219-240, strand=  
target 5' ACAAGCAUAUCCUGGUCCUUCA 3'  
: ::::: .  
query 3' UGUUCGUAUAGGACUAGGAAGU 5'  
query=miR9761, target=R03G\_10797, score=1, range=219-240, strand=  
target 5' ACAAGCAUAUCCUGGUCCUUCA 3'  
: ::::: .  
query 3' UGUUCGUAUAGGACUAGGAAGU 5'  
query=miR9761, target=R03G\_17423, score=1, range=219-240, strand=  
target 5' ACAAGCAUAUCCUGGUCCUUCA 3'  
: ::::: .

query 3' UGUUCGUUAGGACUAGGAAGU 5'  
query=miR9761, target=R03G\_16737, score=1, range=219-240, strand=  
target 5' ACAAGCAUAUCCUGGUCCUUCA 3'  
.....  
query 3' UGUUCGUUAGGACUAGGAAGU 5'  
query=miR9761, target=R03G\_03560, score=1, range=219-240, strand=  
target 5' ACAAGCAUAUCCUGGUCCUUCA 3'  
.....  
query 3' UGUUCGUUAGGACUAGGAAGU 5'  
query=miR9761, target=R03G\_07723, score=1, range=219-240, strand=  
target 5' ACAAGCAUAUCCUGGUCCUUCA 3'  
.....  
query 3' UGUUCGUUAGGACUAGGAAGU 5'  
query=miR9761, target=R03G\_16141, score=1, range=219-240, strand=  
target 5' ACAAGCAUAUCCUGGUCCUUCA 3'  
.....  
query 3' UGUUCGUUAGGACUAGGAAGU 5'  
query=miR9761, target=R03G\_01725, score=1, range=219-240, strand=  
target 5' ACAAGCAUAUCCUGGUCCUUCA 3'  
.....  
query 3' UGUUCGUUAGGACUAGGAAGU 5'  
query=miR9761, target=R03G\_15170, score=1, range=219-240, strand=  
target 5' ACAAGCAUAUCCUGGUCCUUCA 3'  
.....  
query 3' UGUUCGUUAGGACUAGGAAGU 5'  
query=miR9761, target=R03G\_17092, score=1, range=219-240, strand=  
target 5' ACAAGCAUAUCCUGGUCCUUCA 3'  
.....  
query 3' UGUUCGUUAGGACUAGGAAGU 5'  
query=miR9761, target=R03G\_13752, score=1, range=219-240, strand=  
target 5' ACAAGCAUAUCCUGGUCCUUCA 3'  
.....  
query 3' UGUUCGUUAGGACUAGGAAGU 5'  
query=miR9761, target=R03G\_03791, score=1, range=219-240, strand=  
target 5' ACAAGCAUAUCCUGGUCCUUCA 3'  
.....  
query 3' UGUUCGUUAGGACUAGGAAGU 5'  
query=miR9761, target=R03G\_14981, score=1, range=219-240, strand=  
target 5' ACAAGCAUAUCCUGGUCCUUCA 3'  
.....  
query 3' UGUUCGUUAGGACUAGGAAGU 5'  
query=miR9761, target=R03G\_15286, score=1, range=219-240, strand=  
target 5' ACAAGCAUAUCCUGGUCCUUCA 3'  
.....  
query 3' UGUUCGUUAGGACUAGGAAGU 5'

query=miR9761, target=R03G\_17328, score=1, range=219-240, strand=  
target 5' ACAAGCAUAUCCUGGUCCUUCA 3'  
:::::::::::::::::::::::::::  
query 3' UGUUCGUAUAGGACUAGGAAGU 5'  
query=miR9761, target=R03G\_10050, score=1, range=219-240, strand=  
target 5' ACAAGCAUAUCCUGGUCCUUCA 3'  
:::::::::::::::::::::::::::  
query 3' UGUUCGUAUAGGACUAGGAAGU 5'  
query=miR9761, target=R03G\_12950, score=1, range=219-240, strand=  
target 5' ACAAGCAUAUCCUGGUCCUUCA 3'  
:::::::::::::::::::::::::::  
query 3' UGUUCGUAUAGGACUAGGAAGU 5'  
query=miR9761, target=R03G\_15145, score=1, range=219-240, strand=  
target 5' ACAAGCAUAUCCUGGUCCUUCA 3'  
:::::::::::::::::::::::::::  
query 3' UGUUCGUAUAGGACUAGGAAGU 5'  
query=miR9761, target=R03G\_09926, score=1, range=219-240, strand=  
target 5' ACAAGCAUAUCCUGGUCCUUCA 3'  
:::::::::::::::::::::::::::  
query 3' UGUUCGUAUAGGACUAGGAAGU 5'  
query=miR9761, target=R03G\_11536, score=1, range=219-240, strand=  
target 5' ACAAGCAUAUCCUGGUCCUUCA 3'  
:::::::::::::::::::::::::::  
query 3' UGUUCGUAUAGGACUAGGAAGU 5'  
query=miR9761, target=R03G\_05516, score=1, range=219-240, strand=  
target 5' ACAAGCAUAUCCUGGUCCUUCA 3'  
:::::::::::::::::::::::::::  
query 3' UGUUCGUAUAGGACUAGGAAGU 5'  
query=miR9761, target=R03G\_16541, score=1, range=219-240, strand=  
target 5' ACAAGCAUAUCCUGGUCCUUCA 3'  
:::::::::::::::::::::::::::  
query 3' UGUUCGUAUAGGACUAGGAAGU 5'  
query=miR9761, target=R03G\_16124, score=1, range=219-240, strand=  
target 5' ACAAGCAUAUCCUGGUCCUUCA 3'  
:::::::::::::::::::::::::::  
query 3' UGUUCGUAUAGGACUAGGAAGU 5'  
query=miR9761, target=R03G\_11533, score=1, range=219-240, strand=  
target 5' ACAAGCAUAUCCUGGUCCUUCA 3'  
:::::::::::::::::::::::::::  
query 3' UGUUCGUAUAGGACUAGGAAGU 5'  
query=miR9761, target=R03G\_12084, score=1, range=219-240, strand=  
target 5' ACAAGCAUAUCCUGGUCCUUCA 3'  
:::::::::::::::::::::::::::  
query 3' UGUUCGUAUAGGACUAGGAAGU 5'  
query=miR9761, target=R03G\_00250, score=1, range=219-240, strand=



```

.:.:.:.:.:.:.:.:.:.:.:.:.
query 3' UGUUCGUAUAGGACUAGGAAGU 5'
query=miR9761, target=R03G_07680, score=1.5, range=115-136, stran
target 5' GCAAGCAUAUCCUGGUCCUUCA 3'
.:.:.:.:.:.:.:.:.:.:.:.
query 3' UGUUCGUAUAGGACUAGGAAGU 5'
query=miR9761, target=R03G_14999, score=1.5, range=115-136, stran
target 5' GCAAGCAUAUCCUGGUCCUUCA 3'
.:.:.:.:.:.:.:.:.:.:.:.
query 3' UGUUCGUAUAGGACUAGGAAGU 5'
query=miR9761, target=R03G_03581, score=1.5, range=115-136, stran
target 5' GCAAGCAUAUCCUGGUCCUUCA 3'
.:.:.:.:.:.:.:.:.:.:.:.
query 3' UGUUCGUAUAGGACUAGGAAGU 5'
query=miR9761, target=R03G_06443, score=1.5, range=115-136, stran
target 5' GCAAGCAUAUCCUGGUCCUUCA 3'
.:.:.:.:.:.:.:.:.:.:.:.
query 3' UGUUCGUAUAGGACUAGGAAGU 5'
query=miR9761, target=R03G_00253, score=1.5, range=115-136, stran
target 5' GCAAGCAUAUCCUGGUCCUUCA 3'
.:.:.:.:.:.:.:.:.:.:.:.
query 3' UGUUCGUAUAGGACUAGGAAGU 5'
query=miR9761, target=R03G_15156, score=1.5, range=115-136, stran
target 5' GCAAGCAUAUCCUGGUCCUUCA 3'
.:.:.:.:.:.:.:.:.:.:.:.
query 3' UGUUCGUAUAGGACUAGGAAGU 5'
query=miR9761, target=R03G_03789, score=1.5, range=115-136, stran
target 5' GCAAGCAUAUCCUGGUCCUUCA 3'
.:.:.:.:.:.:.:.:.:.:.:.
query 3' UGUUCGUAUAGGACUAGGAAGU 5'
query=miR9761, target=R03G_17237, score=1.5, range=115-136, stran
target 5' GCAAGCAUAUCCUGGUCCUUCA 3'
.:.:.:.:.:.:.:.:.:.:.:.
query 3' UGUUCGUAUAGGACUAGGAAGU 5'
query=miR9761, target=R03G_14360, score=1.5, range=115-136, stran
target 5' GCAAGCAUAUCCUGGUCCUUCA 3'
.:.:.:.:.:.:.:.:.:.:.:.
query 3' UGUUCGUAUAGGACUAGGAAGU 5'
query=miR9761, target=R03G_04687, score=1.5, range=115-136, stran
target 5' GCAAGCAUAUCCUGGUCCUUCA 3'
.:.:.:.:.:.:.:.:.:.:.:.
query 3' UGUUCGUAUAGGACUAGGAAGU 5'
query=miR9761, target=R03G_14985, score=1.5, range=115-136, stran
target 5' GCAAGCAUAUCCUGGUCCUUCA 3'
.:.:.:.:.:.:.:.:.:.:.:.

```

query 3' UGUUCGUUAGGACUAGGAAGU 5'  
query=miR9761, target=R03G\_01202, score=1.5, range=115-136, stran  
target 5' GCAAGCAUAUCCUGGUCCUUCA 3'  
.....  
query 3' UGUUCGUUAGGACUAGGAAGU 5'  
query=miR9761, target=R03G\_14973, score=1.5, range=115-136, stran  
target 5' GCAAGCAUAUCCUGGUCCUUCA 3'  
.....  
query 3' UGUUCGUUAGGACUAGGAAGU 5'  
query=miR9761, target=R03G\_00297, score=1.5, range=115-136, stran  
target 5' GCAAGCAUAUCCUGGUCCUUCA 3'  
.....  
query 3' UGUUCGUUAGGACUAGGAAGU 5'  
query=miR9761, target=R03G\_17153, score=1.5, range=115-136, stran  
target 5' GCAAGCAUAUCCUGGUCCUUCA 3'  
.....  
query 3' UGUUCGUUAGGACUAGGAAGU 5'  
query=miR9761, target=R03G\_09611, score=1.5, range=64-85, strand=  
target 5' GCAAGCAUAUCCUGGUCCUUCA 3'  
.....  
query 3' UGUUCGUUAGGACUAGGAAGU 5'  
query=miR9761, target=R03G\_05633, score=1.5, range=64-85, strand=  
target 5' GCAAGCAUAUCCUGGUCCUUCA 3'  
.....  
query 3' UGUUCGUUAGGACUAGGAAGU 5'  
query=miR9761, target=R03G\_07025, score=1.5, range=64-85, strand=  
target 5' GCAAGCAUAUCCUGGUCCUUCA 3'  
.....  
query 3' UGUUCGUUAGGACUAGGAAGU 5'  
query=miR9761, target=R03G\_13715, score=1.5, range=43-64, strand=  
target 5' GCAAGCAUAUCCUGGUCCUUCA 3'  
.....  
query 3' UGUUCGUUAGGACUAGGAAGU 5'  
query=miR9761, target=R03G\_16695, score=1.5, range=43-64, strand=  
target 5' GCAAGCAUAUCCUGGUCCUUCA 3'  
.....  
query 3' UGUUCGUUAGGACUAGGAAGU 5'  
query=miR9761, target=R03G\_03809, score=1.5, range=43-64, strand=  
target 5' GCAAGCAUAUCCUGGUCCUUCA 3'  
.....  
query 3' UGUUCGUUAGGACUAGGAAGU 5'  
query=miR9761, target=R03G\_03807, score=1.5, range=43-64, strand=  
target 5' GCAAGCAUAUCCUGGUCCUUCA 3'  
.....  
query 3' UGUUCGUUAGGACUAGGAAGU 5'



query=miR9761, target=R03G\_09543, score=1.5, range=172-193, stran  
target 5' GCAAGCAUAUCCUGGUCCUUCA 3'  
.:::::.  
query 3' UGUUCGUAUAGGACUAGGAAGU 5'  
query=miR9761, target=R03G\_04668, score=1.5, range=396-417, stran  
target 5' GCAAGCAUAUCCUGGUCCUUCA 3'  
.:::::.  
query 3' UGUUCGUAUAGGACUAGGAAGU 5'  
query=miR9761, target=R03G\_00689, score=1.5, range=87-108, strand  
target 5' GCAAGCAUAUCCUGGUCCUUCA 3'  
.:::::.  
query 3' UGUUCGUAUAGGACUAGGAAGU 5'  
query=miR9761, target=R03G\_00675, score=1.5, range=219-240, stran  
target 5' GCAAGCAUAUCCUGGUCCUUCA 3'  
.:::::.  
query 3' UGUUCGUAUAGGACUAGGAAGU 5'  
query=miR9761, target=R03G\_10237, score=1.5, range=159-180, stran  
target 5' GCAAGCAUAUCCUGGUCCUUCA 3'  
.:::::.  
query 3' UGUUCGUAUAGGACUAGGAAGU 5'  
query=miR9761, target=R03G\_07298, score=1.5, range=219-240, stran  
target 5' GCAAGCAUAUCCUGGUCCUUCA 3'  
.:::::.  
query 3' UGUUCGUAUAGGACUAGGAAGU 5'  
query=miR9761, target=R03G\_01709, score=1.5, range=219-240, stran  
target 5' GCAAGCAUAUCCUGGUCCUUCA 3'  
.:::::.  
query 3' UGUUCGUAUAGGACUAGGAAGU 5'  
query=miR9761, target=R03G\_17316, score=1.5, range=219-240, stran  
target 5' GCAAGCAUAUCCUGGUCCUUCA 3'  
.:::::.  
query 3' UGUUCGUAUAGGACUAGGAAGU 5'  
query=miR9761, target=R03G\_07135, score=1.5, range=267-288, stran  
target 5' GCAAGCAUAUCCUGGUCCUUCA 3'  
.:::::.  
query 3' UGUUCGUAUAGGACUAGGAAGU 5'  
query=miR9761, target=R03G\_05430, score=1.5, range=207-228, stran  
target 5' GCAAGCAUAUCCUGGUCCUUCA 3'  
.:::::.  
query 3' UGUUCGUAUAGGACUAGGAAGU 5'  
query=miR9761, target=R03G\_14804, score=1.5, range=207-228, stran  
target 5' GCAAGCAUAUCCUGGUCCUUCA 3'  
.:::::.  
query 3' UGUUCGUAUAGGACUAGGAAGU 5'  
query=miR9761, target=R03G\_08837, score=1.5, range=207-228, stran

target 5' GCAAGCAUAUCCUGGUCCUUCA 3'  
.....  
query 3' UGUUCGUAUAGGACUAGGAAGU 5'  
query=miR9761, target=R03G\_13850, score=1.5, range=27-48, strand=  
target 5' GCAAGCAUAUCCUGGUCCUUCA 3'  
.....  
query 3' UGUUCGUAUAGGACUAGGAAGU 5'  
query=miR9761, target=R03G\_13759, score=2, range=115-136, strand=  
target 5' ACAUCAUAUCCUGGUCCUUCA 3'  
:::: .....  
query 3' UGUUCGUAUAGGACUAGGAAGU 5'  
query=miR9761, target=R03G\_13267, score=2, range=219-240, strand=  
target 5' ACAAGCAUAUUCUGGUCCUUCA 3'  
.....  
query 3' UGUUCGUAUAGGACUAGGAAGU 5'  
query=miR9761, target=R03G\_17349, score=2.5, range=112-133, stran  
target 5' GCAAGCAUAUUCUGGUCCUUCA 3'  
.....  
query 3' UGUUCGUAUAGGACUAGGAAGU 5'  
query=miR9761, target=R03G\_11277, score=2.5, range=115-136, stran  
target 5' GCAAGCAUAUUCUGGUCCUUCA 3'  
.....  
query 3' UGUUCGUAUAGGACUAGGAAGU 5'  
query=miR9761, target=R03G\_17304, score=2.5, range=115-136, stran  
target 5' GCAAGCAUAUUCUGGUCCUUCA 3'  
.....  
query 3' UGUUCGUAUAGGACUAGGAAGU 5'  
query=miR9761, target=R03G\_17266, score=2.5, range=115-136, stran  
target 5' GCAAGCAUAUUCUGGUCCUUCA 3'  
.....  
query 3' UGUUCGUAUAGGACUAGGAAGU 5'  
query=miR9761, target=R03G\_05518, score=2.5, range=34-55, strand=  
target 5' GCAAGCUUAUCCUGGUCCUUCA 3'  
.....  
query 3' UGUUCGUAUAGGACUAGGAAGU 5'  
query=miR9761, target=R03G\_16121, score=2.5, range=174-195, stran  
target 5' GCAAGCAUAUCCUGGUUCUUCA 3'  
.....  
query 3' UGUUCGUAUAGGACUAGGAAGU 5'  
query=miR9761, target=R03G\_01946, score=2.5, range=411-432, stran  
target 5' GCAAGCAUAUUCUGGUCCUUCA 3'  
.....  
query 3' UGUUCGUAUAGGACUAGGAAGU 5'  
query=miR9761, target=R03G\_07975, score=2.5, range=354-375, stran  
target 5' GCAAGCAUAUUCUGGUCCUUCA 3'

```

.:
query 3' UGUUCGUAUAGGACUAGGAAGU 5'
query=miR9761, target=R03G_09962, score=3, range=34-55, strand=1
target 5' ACAAGCAUAUCCUGGUGCUUCA 3'
.:
query 3' UGUUCGUAUAGGACUAGGAAGU 5'
query=miR9761, target=R03G_09968, score=3, range=34-55, strand=1
target 5' ACAAGCAUAUCCUGGUGCUUCA 3'
.:
query 3' UGUUCGUAUAGGACUAGGAAGU 5'
query=miR9761, target=R03G_00649, score=3, range=735-756, strand=
target 5' CCCAGCAUAUCCUGAUCCUUCU 3'
:
query 3' UGUUCGUAUAGGACUAGGAAGU 5'
query=miR9761, target=R03G_10037, score=3.5, range=256-277, stran
target 5' GCAAGCAUAUCCUGGUGCUUCA 3'
.:
query 3' UGUUCGUAUAGGACUAGGAAGU 5'
query=miR9761, target=R03G_14993, score=3.5, range=115-136, stran
target 5' GCAAGCAUAUCCUGGUCAUUCA 3'
.:
query 3' UGUUCGUAUAGGACUAGGAAGU 5'
query=miR9761, target=R03G_16894, score=3.5, range=112-133, stran
target 5' GCAAGCAUAUCCUGGUCAUUCA 3'
.:
query 3' UGUUCGUAUAGGACUAGGAAGU 5'
query=miR9761, target=R03G_03777, score=3.5, range=219-240, stran
target 5' GCAAGCAUAUCCUGGUCCUCCA 3'
.:
query 3' UGUUCGUAUAGGACUAGGAAGU 5'
query=miR9761, target=R03G_00252, score=3.5, range=640-660, stran
target 5' ACAAGCAUAUCCUGGUCC-UCG 3'
.:
query 3' UGUUCGUAUAGGACUAGGAAGU 5'
query=miR9761, target=R03G_13754, score=3.5, range=586-606, stran
target 5' ACAAGCAUAUCCUGGUCC-UCG 3'
.:
query 3' UGUUCGUAUAGGACUAGGAAGU 5'
query=miR9761, target=R03G_07673, score=3.5, range=586-606, stran
target 5' ACAAGCAUAUCCUGGUCC-UCG 3'
.:
query 3' UGUUCGUAUAGGACUAGGAAGU 5'
query=miR9761, target=R03G_01938, score=3.5, range=586-606, stran
target 5' ACAAGCAUAUCCUGGUCC-UCG 3'
.:

```

query 3' UGUUCGUUAGGACUAGGAAGU 5'  
query=miR9761, target=R03G\_16144, score=3.5, range=586-606, stran  
target 5' ACAAGCAUAUCCUGGUCC-UCG 3'  
..... ::.

query 3' UGUUCGUUAGGACUAGGAAGU 5'  
query=miR9761, target=R03G\_13000, score=3.5, range=517-537, stran  
target 5' ACAAGCAUAUCCUGGUCC-UCG 3'  
..... ::.

query 3' UGUUCGUUAGGACUAGGAAGU 5'  
query=miR9761, target=R03G\_01738, score=3.5, range=517-537, stran  
target 5' ACAAGCAUAUCCUGGUCC-UCG 3'  
..... ::.

query 3' UGUUCGUUAGGACUAGGAAGU 5'  
query=miR9761, target=R03G\_06740, score=3.5, range=517-537, stran  
target 5' ACAAGCAUAUCCUGGUCC-UCG 3'  
..... ::.

query 3' UGUUCGUUAGGACUAGGAAGU 5'  
query=miR9761, target=R03G\_14972, score=3.5, range=517-537, stran  
target 5' ACAAGCAUAUCCUGGUCC-UCG 3'  
..... ::.

query 3' UGUUCGUUAGGACUAGGAAGU 5'  
query=miR9761, target=R03G\_09598, score=3.5, range=517-537, stran  
target 5' ACAAGCAUAUCCUGGUCC-UCG 3'  
..... ::.

query 3' UGUUCGUUAGGACUAGGAAGU 5'  
query=miR9761, target=R03G\_07111, score=3.5, range=586-606, stran  
target 5' ACAAGCAUAUCCUGGUCC-UCG 3'  
..... ::.

query 3' UGUUCGUUAGGACUAGGAAGU 5'  
query=miR9761, target=R03G\_17461, score=3.5, range=49-69, strand=  
target 5' ACAAGCAUAUCCUGGUCC-UCG 3'  
..... ::.

query 3' UGUUCGUUAGGACUAGGAAGU 5'  
query=miR9761, target=R03G\_16540, score=3.5, range=49-69, strand=  
target 5' ACAAGCAUAUCCUGGUCC-UCG 3'  
..... ::.

query 3' UGUUCGUUAGGACUAGGAAGU 5'  
query=miR9761, target=R03G\_04694, score=3.5, range=49-69, strand=  
target 5' ACAAGCAUAUCCUGGUCC-UCG 3'  
..... ::.

query 3' UGUUCGUUAGGACUAGGAAGU 5'  
query=miR9761, target=R03G\_16120, score=3.5, range=49-69, strand=  
target 5' ACAAGCAUAUCCUGGUCC-UCG 3'  
..... ::.

query 3' UGUUCGUUAGGACUAGGAAGU 5'

query=miR9761, target=R03G\_12189, score=3.5, range=49-69, strand=  
target 5' ACAAGCAUAUCCUGGUCC-UCG 3'  
.....  
query 3' UGUUCGUAUAGGACUAGGAAGU 5'  
query=miR9761, target=R03G\_03608, score=3.5, range=49-69, strand=  
target 5' ACAAGCAUAUCCUGGUCC-UCG 3'  
.....  
query 3' UGUUCGUAUAGGACUAGGAAGU 5'  
query=miR9761, target=R03G\_12062, score=3.5, range=49-69, strand=  
target 5' ACAAGCAUAUCCUGGUCC-UCG 3'  
.....  
query 3' UGUUCGUAUAGGACUAGGAAGU 5'  
query=miR9761, target=R03G\_12003, score=3.5, range=42-62, strand=  
target 5' ACAAGUAUAUCCUGGUCC-UCA 3'  
.....  
query 3' UGUUCGUAUAGGACUAGGAAGU 5'  
query=miR9761, target=R03G\_15529, score=3.5, range=2024-2044,  
strand=-1  
target 5' CUAAGC-UAUCUUGAUCCUUCA 3'  
.....  
query 3' UGUUCGUAUAGGACUAGGAAGU 5'  
query=miR9761, target=R03G\_00105, score=4, range=411-432, strand=  
target 5' ACAAGCAGUUCUUGAUCCUUCU 3'  
.....  
query 3' UGUUCGUAUAGGACUAGGAAGU 5'  
query=miR9761, target=R03G\_12616, score=4, range=355-375, strand=  
target 5' UCAA-UAUGUCCUGAUCCUUCU 3'  
... ..  
query 3' UGUUCGUAUAGGACUAGGAAGU 5'  
query=miR9761, target=R03G\_06719, score=4, range=517-537, strand=  
target 5' ACAAGUAUAUCCUGGUCC-UCG 3'  
.....  
query 3' UGUUCGUAUAGGACUAGGAAGU 5'  
query=miR9761, target=R03G\_13702, score=4, range=517-537, strand=  
target 5' ACAAGUAUAUCCUGGUCC-UCG 3'  
.....  
query 3' UGUUCGUAUAGGACUAGGAAGU 5'  
query=miR9761, target=R03G\_05934, score=4, range=517-537, strand=  
target 5' ACAAGUAUAUCCUGGUCC-UCG 3'  
.....  
query 3' UGUUCGUAUAGGACUAGGAAGU 5'  
query=miR9761, target=R03G\_04671, score=4, range=585-605, strand=  
target 5' AUAAGCAUAUCCUGGUCC-UCG 3'  
.....  
query 3' UGUUCGUAUAGGACUAGGAAGU 5'

query=miR9761, target=R03G\_13860, score=4, range=585-605, strand=  
target 5' AUAAGCAUAUCCUGGUCC-UCG 3'  
:.....: :.  
query 3' UGUUCGUUAGGACUAGGAAGU 5'  
query=miR9761, target=R03G\_02701, score=4, range=549-569, strand=  
target 5' AUAAGCAUAUCCUGGUCC-UCG 3'  
:.....: :.  
query 3' UGUUCGUUAGGACUAGGAAGU 5'  
query=miR9761, target=R03G\_11235, score=4, range=480-501, strand=  
target 5' ACAUGCGUAUCCAGAUCUUCG 3'  
::: :.....: :.....:  
query 3' UGUUCGUUAGGACUAGGAAGU 5'  
query=miR399f, target=R03G\_11770, score=0, range=17-36, strand=1  
target 5' CAGGACAAAUCGCGUUGGCA 3'  
:.....: :  
query 3' GUCCUGUUUAGCGCAACCGU 5'  
query=miR399f, target=R03G\_04217, score=0, range=17-36, strand=1  
target 5' CAGGACAAAUCGCGUUGGCA 3'  
:.....: :  
query 3' GUCCUGUUUAGCGCAACCGU 5'  
query=miR399f, target=R03G\_16135, score=0, range=17-36, strand=1  
target 5' CAGGACAAAUCGCGUUGGCA 3'  
:.....: :  
query 3' GUCCUGUUUAGCGCAACCGU 5'  
query=miR399f, target=R03G\_10523, score=0, range=17-36, strand=1  
target 5' CAGGACAAAUCGCGUUGGCA 3'  
:.....: :  
query 3' GUCCUGUUUAGCGCAACCGU 5'  
query=miR399f, target=R03G\_01941, score=0, range=17-36, strand=1  
target 5' CAGGACAAAUCGCGUUGGCA 3'  
:.....: :  
query 3' GUCCUGUUUAGCGCAACCGU 5'  
query=miR399f, target=R03G\_03105, score=0, range=17-36, strand=1  
target 5' CAGGACAAAUCGCGUUGGCA 3'  
:.....: :  
query 3' GUCCUGUUUAGCGCAACCGU 5'  
query=miR399f, target=R03G\_15285, score=0, range=17-36, strand=1  
target 5' CAGGACAAAUCGCGUUGGCA 3'  
:.....: :  
query 3' GUCCUGUUUAGCGCAACCGU 5'  
query=miR399f, target=R03G\_09599, score=0, range=17-36, strand=1  
target 5' CAGGACAAAUCGCGUUGGCA 3'  
:.....: :  
query 3' GUCCUGUUUAGCGCAACCGU 5'  
query=miR399f, target=R03G\_09932, score=0, range=17-36, strand=1







: : : :::::::::::::::  
query 3' GGAAGAGUGUUUACCAGAU 5'  
query=miR5632-3p, target=R03G\_07707, score=0, range=1004-1024,  
strand=1  
target 5' AGUAUCCAGACUAAAUCCAA 3'  
:::::::::::::  
query 3' UCAUAGGUCUGAAUUUAGGUU 5'  
query=miR5632-3p, target=R03G\_13919, score=0, range=1004-1024,  
strand=1  
target 5' AGUAUCCAGACUAAAUCCAA 3'  
:::::::::::::  
query 3' UCAUAGGUCUGAAUUUAGGUU 5'  
query=miR5632-3p, target=R03G\_07690, score=0, range=812-832, stra  
target 5' AGUAUCCAGACUAAAUCCAA 3'  
:::::::::::::  
query 3' UCAUAGGUCUGAAUUUAGGUU 5'  
query=miR5632-3p, target=R03G\_00679, score=1, range=1004-1024,  
strand=1  
target 5' AGUCUCCAGACUAAAUCCAA 3'  
::: :::::::::::::::  
query 3' UCAUAGGUCUGAAUUUAGGUU 5'  
query=miR5632-3p, target=R03G\_10550, score=1, range=812-832, stra  
target 5' AGUUUCCAGACUAAAUCCAA 3'  
::: :::::::::::::::  
query 3' UCAUAGGUCUGAAUUUAGGUU 5'  
query=miR5632-3p, target=R03G\_17408, score=1, range=812-832, stra  
target 5' AGUCUCCAGACUAAAUCCAA 3'  
::: :::::::::::::::  
query 3' UCAUAGGUCUGAAUUUAGGUU 5'  
query=miR5632-3p, target=R03G\_11281, score=1, range=767-787, stra  
target 5' AGUCUCCAGACUAAAUCCAA 3'  
::: :::::::::::::::  
query 3' UCAUAGGUCUGAAUUUAGGUU 5'  
query=miR5632-3p, target=R03G\_12166, score=1, range=812-832, stra  
target 5' AGUUUCCAGACUAAAUCCAA 3'  
::: :::::::::::::::  
query 3' UCAUAGGUCUGAAUUUAGGUU 5'  
query=miR5632-3p, target=R03G\_10787, score=1, range=812-832, stra  
target 5' AGUCUCCAGACUAAAUCCAA 3'  
::: :::::::::::::::  
query 3' UCAUAGGUCUGAAUUUAGGUU 5'  
query=miR5632-3p, target=R03G\_08847, score=1, range=812-832, stra  
target 5' AGUUUCCAGACUAAAUCCAA 3'  
::: :::::::::::::::  
query 3' UCAUAGGUCUGAAUUUAGGUU 5'

query=miR5632-3p, target=R03G\_12659, score=1, range=401-421, strand=1  
target 5' AGUCUCCAGACUUAAAUCCAA 3'  
::: ::::::::::::::::::::::

query 3' UCAUAGGUCUGAAUUUAGGUU 5'  
query=miR5632-3p, target=R03G\_00700, score=1, range=251-271, strand=1  
target 5' AGUCUCCAGACUUAAAUCCAA 3'  
::: ::::::::::::::::::::::

query 3' UCAUAGGUCUGAAUUUAGGUU 5'  
query=miR5632-3p, target=R03G\_16140, score=1, range=251-271, strand=1  
target 5' AGUUUCCAGACUUAAAUCCAA 3'  
::: ::::::::::::::::::::::

query 3' UCAUAGGUCUGAAUUUAGGUU 5'  
query=miR5632-3p, target=R03G\_15582, score=1, range=191-211, strand=1  
target 5' AGUCUCCAGACUUAAAUCCAA 3'  
::: ::::::::::::::::::::::

query 3' UCAUAGGUCUGAAUUUAGGUU 5'  
query=miR5632-3p, target=R03G\_13453, score=1, range=191-211, strand=1  
target 5' AGUCUCCAGACUUAAAUCCAA 3'  
::: ::::::::::::::::::::::

query 3' UCAUAGGUCUGAAUUUAGGUU 5'  
query=miR5632-3p, target=R03G\_10220, score=1, range=251-271, strand=1  
target 5' AGUCUCCAGACUUAAAUCCAA 3'  
::: ::::::::::::::::::::::

query 3' UCAUAGGUCUGAAUUUAGGUU 5'  
query=miR5632-3p, target=R03G\_02846, score=1, range=17-37, strand=1  
target 5' AGUCUCCAGACUUAAAUCCAA 3'  
::: ::::::::::::::::::::::

query 3' UCAUAGGUCUGAAUUUAGGUU 5'  
query=miR5632-3p, target=R03G\_03624, score=1.5, range=812-832, strand=1  
target 5' AGUCUUCAGACUUAAAUCCAA 3'  
::: ::::::::::::::::::::::

query 3' UCAUAGGUCUGAAUUUAGGUU 5'  
query=miR5632-3p, target=R03G\_03603, score=1.5, range=251-271, strand=1  
target 5' AGUUUUCAGACUUAAAUCCAA 3'  
::: ::::::::::::::::::::::

query 3' UCAUAGGUCUGAAUUUAGGUU 5'  
query=miR5632-3p, target=R03G\_03112, score=2, range=806-826, strand=1  
target 5' AGAGUCCGGACUUAAAUCCAA 3'  
::: ::::::::::::::::::::::

query 3' UCAUAGGUCUGAAUUUAGGUU 5'  
query=miR5632-3p, target=R03G\_05522, score=2, range=806-826, strand=1  
target 5' AGAGUCCGGACUUAAAUCCAA 3'  
::: ::::::::::::::::::::::

query 3' UCAUAGGUCUGAAUUUAGGUU 5'  
query=miR5632-3p, target=R03G\_00240, score=2, range=749-769, str  
target 5' AGAGUCCGGACUUAAAUCCAA 3'  
:: .....  
query 3' UCAUAGGUCUGAAUUUAGGUU 5'  
query=miR5632-3p, target=R03G\_02227, score=2, range=806-826, str  
target 5' AGAGUCCGGACUUAAAUCCAA 3'  
:: .....  
query 3' UCAUAGGUCUGAAUUUAGGUU 5'  
query=miR5632-3p, target=R03G\_14784, score=2, range=440-460, str  
target 5' AGAGUCCGGACUUAAAUCCAA 3'  
:: .....  
query 3' UCAUAGGUCUGAAUUUAGGUU 5'  
query=miR5632-3p, target=R03G\_17423, score=2, range=440-460, str  
target 5' AGAGUCCGGACUUAAAUCCAA 3'  
:: .....  
query 3' UCAUAGGUCUGAAUUUAGGUU 5'  
query=miR5632-3p, target=R03G\_16737, score=2, range=440-460, str  
target 5' AGAGUCCGGACUUAAAUCCAA 3'  
:: .....  
query 3' UCAUAGGUCUGAAUUUAGGUU 5'  
query=miR5632-3p, target=R03G\_10797, score=2, range=440-460, str  
target 5' AGAGUCCGGACUUAAAUCCAA 3'  
:: .....  
query 3' UCAUAGGUCUGAAUUUAGGUU 5'  
query=miR5632-3p, target=R03G\_03560, score=2, range=440-460, str  
target 5' AGAGUCCGGACUUAAAUCCAA 3'  
:: .....  
query 3' UCAUAGGUCUGAAUUUAGGUU 5'  
query=miR5632-3p, target=R03G\_17328, score=2, range=440-460, str  
target 5' AGAGUCCGGACUUAAAUCCAA 3'  
:: .....  
query 3' UCAUAGGUCUGAAUUUAGGUU 5'  
query=miR5632-3p, target=R03G\_12950, score=2, range=440-460, str  
target 5' AGAGUCCGGACUUAAAUCCAA 3'  
:: .....  
query 3' UCAUAGGUCUGAAUUUAGGUU 5'  
query=miR5632-3p, target=R03G\_14981, score=2, range=440-460, str  
target 5' AGAGUCCGGACUUAAAUCCAA 3'  
:: .....  
query 3' UCAUAGGUCUGAAUUUAGGUU 5'  
query=miR5632-3p, target=R03G\_16124, score=2, range=440-460, str  
target 5' AGAGUCCGGACUUAAAUCCAA 3'  
:: .....  
query 3' UCAUAGGUCUGAAUUUAGGUU 5'

query=miR5632-3p, target=R03G\_15170, score=2, range=440-460, str  
target 5' AGAGUCCGGACUUAAAUCCAA 3'  
:: .....  
query 3' UCAUAGGUCUGAAUUUAGGUU 5'  
query=miR5632-3p, target=R03G\_10050, score=2, range=440-460, str  
target 5' AGAGUCCGGACUUAAAUCCAA 3'  
:: .....  
query 3' UCAUAGGUCUGAAUUUAGGUU 5'  
query=miR5632-3p, target=R03G\_15145, score=2, range=440-460, str  
target 5' AGAGUCCGGACUUAAAUCCAA 3'  
:: .....  
query 3' UCAUAGGUCUGAAUUUAGGUU 5'  
query=miR5632-3p, target=R03G\_13752, score=2, range=440-460, str  
target 5' AGAGUCCGGACUUAAAUCCAA 3'  
:: .....  
query 3' UCAUAGGUCUGAAUUUAGGUU 5'  
query=miR5632-3p, target=R03G\_03791, score=2, range=440-460, str  
target 5' AGAGUCCGGACUUAAAUCCAA 3'  
:: .....  
query 3' UCAUAGGUCUGAAUUUAGGUU 5'  
query=miR5632-3p, target=R03G\_07723, score=2, range=440-460, str  
target 5' AGAGUCCGGACUUAAAUCCAA 3'  
:: .....  
query 3' UCAUAGGUCUGAAUUUAGGUU 5'  
query=miR5632-3p, target=R03G\_17092, score=2, range=440-460, str  
target 5' AGAGUCCGGACUUAAAUCCAA 3'  
:: .....  
query 3' UCAUAGGUCUGAAUUUAGGUU 5'  
query=miR5632-3p, target=R03G\_16141, score=2, range=440-460, str  
target 5' AGAGUCCGGACUUAAAUCCAA 3'  
:: .....  
query 3' UCAUAGGUCUGAAUUUAGGUU 5'  
query=miR5632-3p, target=R03G\_16541, score=2, range=440-460, str  
target 5' AGAGUCCGGACUUAAAUCCAA 3'  
:: .....  
query 3' UCAUAGGUCUGAAUUUAGGUU 5'  
query=miR5632-3p, target=R03G\_11536, score=2, range=440-460, str  
target 5' AGAGUCCGGACUUAAAUCCAA 3'  
:: .....  
query 3' UCAUAGGUCUGAAUUUAGGUU 5'  
query=miR5632-3p, target=R03G\_15286, score=2, range=440-460, str  
target 5' AGAGUCCGGACUUAAAUCCAA 3'  
:: .....  
query 3' UCAUAGGUCUGAAUUUAGGUU 5'  
query=miR5632-3p, target=R03G\_09926, score=2, range=440-460, str

target 5' AGAGUCCGGACUUAAAUCCAA 3'  
:: .....  
query 3' UCAUAGGUCUGAAUUUAGGUU 5'  
query=miR5632-3p, target=R03G\_05516, score=2, range=440-460, stra  
target 5' AGAGUCCGGACUUAAAUCCAA 3'  
:: .....  
query 3' UCAUAGGUCUGAAUUUAGGUU 5'  
query=miR5632-3p, target=R03G\_01725, score=2, range=440-460, stra  
target 5' AGAGUCCGGACUUAAAUCCAA 3'  
:: .....  
query 3' UCAUAGGUCUGAAUUUAGGUU 5'  
query=miR5632-3p, target=R03G\_07136, score=2, range=131-151, stra  
target 5' AGAGUCCGGACUUAAAUCCAA 3'  
:: .....  
query 3' UCAUAGGUCUGAAUUUAGGUU 5'  
query=miR5632-3p, target=R03G\_11533, score=2, range=440-460, stra  
target 5' AGAGUCCGGACUUAAAUCCAA 3'  
:: .....  
query 3' UCAUAGGUCUGAAUUUAGGUU 5'  
query=miR5632-3p, target=R03G\_13286, score=2, range=1004-1024,  
strand=1  
target 5' AGCCUCCAGACUUAAAUCCAA 3'  
:: .....  
query 3' UCAUAGGUCUGAAUUUAGGUU 5'  
query=miR5632-3p, target=R03G\_00284, score=2, range=821-841, stra  
target 5' AGCCUCCAGACUUAAAUCCAA 3'  
:: .....  
query 3' UCAUAGGUCUGAAUUUAGGUU 5'  
query=miR5632-3p, target=R03G\_16727, score=2, range=812-832, stra  
target 5' AGCCUCCAGACUUAAAUCCAA 3'  
:: .....  
query 3' UCAUAGGUCUGAAUUUAGGUU 5'  
query=miR5632-3p, target=R03G\_16719, score=2, range=812-832, stra  
target 5' AGCCUCCAGACUUAAAUCCAA 3'  
:: .....  
query 3' UCAUAGGUCUGAAUUUAGGUU 5'  
query=miR5632-3p, target=R03G\_01959, score=2, range=251-271, stra  
target 5' AGCCUCCAGACUUAAAUCCAA 3'  
:: .....  
query 3' UCAUAGGUCUGAAUUUAGGUU 5'  
query=miR5632-3p, target=R03G\_16751, score=2, range=401-421, stra  
target 5' AGUUCCCAGACUUAAAUCCAA 3'  
::: .....  
query 3' UCAUAGGUCUGAAUUUAGGUU 5'  
query=miR5632-3p, target=R03G\_03554, score=3, range=704-724, stra



: : :::::::::::::: :  
query 3' UCAUAGGUCUGAAUUUAGGUU 5'  
query=miR5632-3p, target=R03G\_16829, score=4, range=794-814, stra  
target 5' ACUCUCCAGACUAAAUCCUA 3'  
: : :::::::::::::: :  
query 3' UCAUAGGUCUGAAUUUAGGUU 5'  
query=miR5632-3p, target=R03G\_13734, score=4, range=794-814, stra  
target 5' ACUCUCCAGACUAAAUCCUA 3'  
: : :::::::::::::: :  
query 3' UCAUAGGUCUGAAUUUAGGUU 5'  
query=miR5632-3p, target=R03G\_17202, score=4, range=794-814, stra  
target 5' ACUCUCCAGACUAAAUCCUA 3'  
: : :::::::::::::: :  
query 3' UCAUAGGUCUGAAUUUAGGUU 5'  
query=miR5632-3p, target=R03G\_16428, score=4, range=431-451, stra  
target 5' ACUCUCCAGACUAAAUCCUA 3'  
: : :::::::::::::: :  
query 3' UCAUAGGUCUGAAUUUAGGUU 5'  
query=miR5632-3p, target=R03G\_03772, score=4, range=812-832, stra  
target 5' AGUCCCCUGACUUGAAUCCAA 3'  
::: : : :::::::::::::: :  
query 3' UCAUAGGUCUGAAUUUAGGUU 5'  
query=miR5632-3p, target=R03G\_05945, score=4, range=431-451, stra  
target 5' ACUCUCCAGACUAAAUCCUA 3'  
: : :::::::::::::: :  
query 3' UCAUAGGUCUGAAUUUAGGUU 5'  
query=miR5632-3p, target=R03G\_11411, score=4, range=431-451, stra  
target 5' ACUCUCCAGACUAAAUCCUA 3'  
: : :::::::::::::: :  
query 3' UCAUAGGUCUGAAUUUAGGUU 5'  
query=miR5632-3p, target=R03G\_08842, score=4, range=812-832, stra  
target 5' AGUCCCCUGACUUGAAUCCAA 3'  
::: : : :::::::::::::: :  
query 3' UCAUAGGUCUGAAUUUAGGUU 5'  
query=miR5632-3p, target=R03G\_15579, score=4, range=812-832, stra  
target 5' AGUCCCCUGACUUGAAUCCAA 3'  
::: : : :::::::::::::: :  
query 3' UCAUAGGUCUGAAUUUAGGUU 5'  
query=miR5632-3p, target=R03G\_02844, score=4, range=590-610, stra  
target 5' AGUCACCUGACUUGAAUCCAA 3'  
::: : : :::::::::::::: :  
query 3' UCAUAGGUCUGAAUUUAGGUU 5'  
query=miR5632-3p, target=R03G\_03766, score=4, range=590-610, stra  
target 5' AGUCACCUGACUUGAAUCCAA 3'  
::: : : :::::::::::::: :





query 3' GACUUCAGUUACCCGUAAUU 5'  
query=miR475a-3p, target=R03G\_15802, score=0, range=3409-3428,  
strand=1  
target 5' CUGAAGUCA AUGGGCAUUA 3'  
::::::::::::::::::  
query 3' GACUUCAGUUACCCGUAAUU 5'  
query=miR475a-3p, target=R03G\_12567, score=0, range=3409-3428,  
strand=1  
target 5' CUGAAGUCA AUGGGCAUUA 3'  
::::::::::::::::::  
query 3' GACUUCAGUUACCCGUAAUU 5'  
query=miR475a-3p, target=R03G\_04496, score=0, range=3031-3050,  
strand=1  
target 5' CUGAAGUCA AUGGGCAUUA 3'  
::::::::::::::::::  
query 3' GACUUCAGUUACCCGUAAUU 5'  
query=miR475a-3p, target=R03G\_06775, score=0, range=3409-3428,  
strand=1  
target 5' CUGAAGUCA AUGGGCAUUA 3'  
::::::::::::::::::  
query 3' GACUUCAGUUACCCGUAAUU 5'  
query=miR475a-3p, target=R03G\_04252, score=0, range=3409-3428,  
strand=1  
target 5' CUGAAGUCA AUGGGCAUUA 3'  
::::::::::::::::::  
query 3' GACUUCAGUUACCCGUAAUU 5'  
query=miR475a-3p, target=R03G\_07854, score=0, range=3409-3428,  
strand=1  
target 5' CUGAAGUCA AUGGGCAUUA 3'  
::::::::::::::::::  
query 3' GACUUCAGUUACCCGUAAUU 5'  
query=miR475a-3p, target=R03G\_14949, score=0, range=3031-3050,  
strand=1  
target 5' CUGAAGUCA AUGGGCAUUA 3'  
::::::::::::::::::  
query 3' GACUUCAGUUACCCGUAAUU 5'  
query=miR475a-3p, target=R03G\_01156, score=3, range=778-797, stra  
target 5' CUGAAGUCA AUUGGUAUUA 3'  
:::::::::: ::::::  
query 3' GACUUCAGUUACCCGUAAUU 5'  
query=miR475a-3p, target=R03G\_16981, score=3, range=304-323, stra  
target 5' CUGAAUUC AAUUGGCAUUA 3'  
::::: ::::: ::::::  
query 3' GACUUCAGUUACCCGUAAUU 5'  
query=miR475a-3p, target=R03G\_16987, score=3, range=286-305, stra



query 3' AACUGCUUUACUCAACAAACGU 5'  
query=miR7725a-3p, target=R03G\_07028, score=0, range=914-935,  
strand=-1  
target 5' UUGACGAAAUGAGUUGUUUGCA 3'  
::::::::::::::::::::::::::

query 3' AACUGCUUUACUCAACAAACGU 5'  
query=miR7725a-3p, target=R03G\_15135, score=0, range=1844-1865,  
strand=-1  
target 5' UUGACGAAAUGAGUUGUUUGCA 3'  
::::::::::::::::::::::::::

query 3' AACUGCUUUACUCAACAAACGU 5'  
query=miR7725a-3p, target=R03G\_17384, score=0, range=1844-1865,  
strand=-1  
target 5' UUGACGAAAUGAGUUGUUUGCA 3'  
::::::::::::::::::::::::::

query 3' AACUGCUUUACUCAACAAACGU 5'  
query=miR7725a-3p, target=R03G\_05919, score=0, range=2018-2039,  
strand=-1  
target 5' UUGACGAAAUGAGUUGUUUGCA 3'  
::::::::::::::::::::::::::

query 3' AACUGCUUUACUCAACAAACGU 5'  
query=miR7725a-3p, target=R03G\_16914, score=0, range=1778-1799,  
strand=-1  
target 5' UUGACGAAAUGAGUUGUUUGCA 3'  
::::::::::::::::::::::::::

query 3' AACUGCUUUACUCAACAAACGU 5'  
query=miR7725a-3p, target=R03G\_06727, score=0, range=1982-2003,  
strand=-1  
target 5' UUGACGAAAUGAGUUGUUUGCA 3'  
::::::::::::::::::::::::::

query 3' AACUGCUUUACUCAACAAACGU 5'  
query=miR6029, target=R03G\_13006, score=4, range=1448-1468, stran  
target 5' UAGCUG-AUAUUCACAACCUUG 3'  
:::::: :.::::::::::::...

query 3' AUCGACUUGUAAGUGUUGGGGU 5'  
query=miR1059, target=R03G\_11686, score=0, range=863-884, strand=  
target 5' GUUGUUGUGAAGAUAGCUUUCA 3'  
::::::::::::::::::::::::::

query 3' CAACAACACUUCUAUCGAAAGU 5'  
query=miR1059, target=R03G\_13429, score=0, range=113-134, strand=  
target 5' GUUGUUGUGAAGAUAGCUUUCA 3'  
::::::::::::::::::::::::::

query 3' CAACAACACUUCUAUCGAAAGU 5'  
query=miR1059, target=R03G\_13415, score=0, range=572-593, strand=  
target 5' GUUGUUGUGAAGAUAGCUUUCA 3'

query 3' CAACAACACUUCUAUCGAAAGU 5'  
query=miR1059, target=R03G\_15710, score=0, range=1100-1121, stran  
target 5' GUUGUUGUGAAGAUAGCUUUCA 3'

query 3' CAACAACACUUCUAUCGAAAGU 5'  
query=miR1059, target=R03G\_15719, score=0, range=1100-1121, stran  
target 5' GUUGUUGUGAAGAUAGCUUUCA 3'

query 3' CAACAACACUUCUAUCGAAAGU 5'  
query=miR1059, target=R03G\_07566, score=0, range=1100-1121, stran  
target 5' GUUGUUGUGAAGAUAGCUUUCA 3'

query 3' CAACAACACUUCUAUCGAAAGU 5'  
query=miR1059, target=R03G\_15077, score=0, range=1010-1031, stran  
target 5' GUUGUUGUGAAGAUAGCUUUCA 3'

query 3' CAACAACACUUCUAUCGAAAGU 5'  
query=miR1059, target=R03G\_10583, score=0, range=1010-1031, stran  
target 5' GUUGUUGUGAAGAUAGCUUUCA 3'

query 3' CAACAACACUUCUAUCGAAAGU 5'  
query=miR1059, target=R03G\_14857, score=0, range=968-989, strand=  
target 5' GUUGUUGUGAAGAUAGCUUUCA 3'

query 3' CAACAACACUUCUAUCGAAAGU 5'  
query=miR1059, target=R03G\_14874, score=0, range=968-989, strand=  
target 5' GUUGUUGUGAAGAUAGCUUUCA 3'

query 3' CAACAACACUUCUAUCGAAAGU 5'  
query=miR1059, target=R03G\_09088, score=0, range=863-884, strand=  
target 5' GUUGUUGUGAAGAUAGCUUUCA 3'

query 3' CAACAACACUUCUAUCGAAAGU 5'  
query=miR1059, target=R03G\_03773, score=0, range=113-134, strand=  
target 5' GUUGUUGUGAAGAUAGCUUUCA 3'

query 3' CAACAACACUUCUAUCGAAAGU 5'  
query=miR1059, target=R03G\_15418, score=2, range=1112-1133, stran  
target 5' GUUGUUGUGAAGAUAGCUUCCA 3'

query 3' CAACAACACUUCUAUCGAAAGU 5'  
query=miR1059, target=R03G\_16388, score=3, range=152-173, strand=  
target 5' GUUGUUGUGAGGAGAGCUUUCA 3'

query 3' CAACAACACUUCUAUCGAAAGU 5'  
query=miR1059, target=R03G\_07497, score=3, range=152-173, strand=  
target 5' GUUGCUGUGAAGAGAGCUUUCA 3'  
:::: :::::::::: ::::::::::  
query 3' CAACAACACUUCUAUCGAAAGU 5'  
query=miR1059, target=R03G\_03932, score=4, range=152-173, strand=  
target 5' GUUGUUGUGAAGAGAGCUUCCA 3'  
:::::::::::::::::: ::::: ::  
query 3' CAACAACACUUCUAUCGAAAGU 5'  
query=miR1059, target=R03G\_16153, score=4, range=113-134, strand=  
target 5' GUUACUGUGAAGAGAGCUUUCA 3'  
::: :::::::::: ::::::::::  
query 3' CAACAACACUUCUAUCGAAAGU 5'  
query=miR1059, target=R03G\_04982, score=4, range=113-134, strand=  
target 5' GUUGCUGUAAAGAGAGCUUUCA 3'  
:::: :::: ::::: ::::::::::  
query 3' CAACAACACUUCUAUCGAAAGU 5'  
query=miR6284, target=R03G\_03193, score=3, range=55-73, strand=-1  
target 5' AUGGUUCAUCUUGGUCAUA 3'  
: : ::::::::::::::::::::  
query 3' UUCGAAGUAGGACCAGUAU 5'  
query=miR6284, target=R03G\_06931, score=3.5, range=304-322, stran  
target 5' AUGAUUCAUCCUGGUUAUG 3'  
: : ::::::::::::::::::::.  
query 3' UUCGAAGUAGGACCAGUAU 5'  
query=miR6284, target=R03G\_11359, score=4, range=192-210, strand=  
target 5' AAGCAUUAUCCUGAUCAUA 3'  
:::: :.:::::::::: :::::  
query 3' UUCGAAGUAGGACCAGUAU 5'  
query=miR6284, target=R03G\_06036, score=4, range=4816-4834, stran  
target 5' UUACUUCAUCCUGGUCAUU 3'  
::::::::::::::::::  
query 3' UUCGAAGUAGGACCAGUAU 5'  
query=miR6284, target=R03G\_01819, score=4, range=2121-2140, stran  
target 5' AAGACUUCAUCCUGGGCAUC 3'  
::: :::::::::::::::::::: :::  
query 3' UUC-GAAGUAGGACCAGUAU 5'  
query=miR6284, target=R03G\_12801, score=4, range=25-42, strand=1  
target 5' AAGCUAUAUCCUGGU-AUA 3'  
::::: .:::::::::: :::  
query 3' UUCGAAGUAGGACCAGUAU 5'  
query=miR6284, target=R03G\_15189, score=4, range=566-583, strand=  
target 5' AAGC-UCAUCCUGAUCGUA 3'  
::::: :::::::::::::::::::: :::::  
query 3' UUCGAAGUAGGACCAGUAU 5'

query=miR6284, target=R03G\_13203, score=4, range=1180-1197, stran  
target 5' AAGCAUCAUCCUGGU-AUU 3'  
:::: ::::::::::: ::  
query 3' UUCGAAGUAGGACCAGUAU 5'  
query=miR6284, target=R03G\_16894, score=4, range=114-131, strand=  
target 5' AAGCAU-AUCCUGGUCAUU 3'  
:::: : ::::::::::: ::  
query 3' UUCGAAGUAGGACCAGUAU 5'  
query=miR6284, target=R03G\_14993, score=4, range=117-134, strand=  
target 5' AAGCAU-AUCCUGGUCAUU 3'  
:::: : ::::::::::: ::  
query 3' UUCGAAGUAGGACCAGUAU 5'  
query=miR6284, target=R03G\_14020, score=4, range=4663-4682, stran  
target 5' AAGCGUUCGUCUUGGUCAUC 3'  
:::: ::::::::::: ::  
query 3' UUCG-AAGUAGGACCAGUAU 5'  
query=miR6284, target=R03G\_04648, score=4, range=25-42, strand=-1  
target 5' AAG-UUCAUCUUGUUCAUA 3'  
::: ::::::::::: ::::::  
query 3' UUCGAAGUAGGACCAGUAU 5'  
query=miR6284, target=R03G\_06167, score=4, range=1572-1590, stran  
target 5' AUACUCCAUCUUGGUCAUA 3'  
: :: ::::::::::: ::  
query 3' UUCGAAGUAGGACCAGUAU 5'  
query=miR6284, target=R03G\_07951, score=4, range=1368-1385, stran  
target 5' AAG-UUCAUCCUGUUCAUU 3'  
::: ::::::::::: ::::::  
query 3' UUCGAAGUAGGACCAGUAU 5'  
query=miR1061-3p, target=R03G\_19004, score=0, range=797-814, stra  
target 5' CAUUAUCCAUGCUAACA 3'  
::::::::::::::::::::  
query 3' GAAUAAGGUACGAUUGU 5'  
query=miR1061-3p, target=R03G\_19001, score=0, range=501-518, stra  
target 5' CAUUAUCCAUGCUAACA 3'  
::::::::::::::::::::  
query 3' GAAUAAGGUACGAUUGU 5'  
query=miR1061-3p, target=R03G\_10004, score=2, range=230-246, stra  
target 5' CAUU-UUCAUGCUAAUA 3'  
:::: ::::::::::: ::  
query 3' GAAUAAGGUACGAUUGU 5'  
query=miR1061-3p, target=R03G\_07815, score=3, range=738-754, stra  
target 5' CAUUAUCCAUGC-AAUA 3'  
::::::::::::::::: :::  
query 3' GAAUAAGGUACGAUUGU 5'  
query=miR1061-3p, target=R03G\_09588, score=3, range=663-679, stra

target 5' CAGU-UUCCAUGUUAACA 3'  
:: : :::::::::::::::  
query 3' GUAAUAAGGUACGAUUGU 5'  
query=miR1061-3p, target=R03G\_08463, score=3, range=947-963, str  
target 5' CAGU-UUCCAUGCUAACU 3'  
:: : :::::::::::::::  
query 3' GUAAUAAGGUACGAUUGU 5'  
query=miR1061-3p, target=R03G\_13503, score=3.5, range=1240-1257,  
strand=1  
target 5' UAUUAUUUCAUGCUGAUA 3'  
.:::::::::::::  
query 3' GUAAUAAGGUACGAUUGU 5'  
query=miR1061-3p, target=R03G\_07650, score=3.5, range=100-118,  
strand=1  
target 5' UAUUAUCCACUGCUGACA 3'  
.:::::::::::: :  
query 3' GUAAUAAGGU-ACGAUUGU 5'  
query=miR1061-3p, target=R03G\_12113, score=3.5, range=2253-2270,  
strand=-1  
target 5' GAUUGUUUCAUGCUAUA 3'  
:::::::::::::  
query 3' GUAAUAAGGUACGAUUGU 5'  
query=miR1061-3p, target=R03G\_01111, score=3.5, range=273-289,  
strand=-1  
target 5' UCUUAUCCAUGCU-ACA 3'  
. : :::::::::::::: :  
query 3' GUAAUAAGGUACGAUUGU 5'  
query=miR1061-3p, target=R03G\_05753, score=4, range=110-127, str  
target 5' UGUUAUCCUUGUUAACA 3'  
.:::::::::::: :  
query 3' GUAAUAAGGUACGAUUGU 5'  
query=miR1061-3p, target=R03G\_00027, score=4, range=173-190, str  
target 5' AAUUAUUCUGUGCUAACU 3'  
:::::::::::::  
query 3' GUAAUAAGGUACGAUUGU 5'  
query=miR1061-3p, target=R03G\_10806, score=4, range=1253-1270,  
strand=1  
target 5' CAGGAUCCAUGCUGGCA 3'  
:: : :::::::::::::::  
query 3' GUAAUAAGGUACGAUUGU 5'  
query=miR1061-3p, target=R03G\_07773, score=4, range=811-828, str  
target 5' CAUAUUUCUAUGCUAGCA 3'  
:: : :::::::::::::::  
query 3' GUAAUAAGGUACGAUUGU 5'  
query=miR1061-3p, target=R03G\_08438, score=4, range=2454-2470,

```
strand=1
target 5' CA-UAUUCAAUGCUAACC 3'
:: ::::: :::::
query 3' GUAAUAAGGUACGAUUGU 5'
query=miR1061-3p, target=R03G_00213, score=4, range=2244-2262,
strand=-1
target 5' CAUUAUCCAUGCCAACA 3'
::::::::::: :: :::::
query 3' GUAAUAAGGUA-CGAUUGU 5'
query=miR1061-3p, target=R03G_02280, score=4, range=372-389, stra
target 5' UAUUUUCCAUGCUAUCG 3'
.:::: ::::: :.
query 3' GUAAUAAGGUACGAUUGU 5'
query=miR1061-3p, target=R03G_04817, score=4, range=650-667, stra
target 5' CCUUAUCCCUGCUAACU 3'
: ::::: :::::
query 3' GUAAUAAGGUACGAUUGU 5'
query=miR1061-3p, target=R03G_12684, score=4, range=336-352, stra
target 5' CAGU-UUCCAUGUUGACA 3'
:: : :::::
query 3' GUAAUAAGGUACGAUUGU 5'
query=miR1061-3p, target=R03G_09476, score=4, range=315-331, stra
target 5' UGUUCUCCAUGCU-ACA 3'
.:::: ::::: :::::
query 3' GUAAUAAGGUACGAUUGU 5'
query=miR1061-3p, target=R03G_04299, score=4, range=258-276, stra
target 5' CACUUCUCCUUGCUAACA 3'
:: : ::::: :::::
query 3' GU-AAUAAGGUACGAUUGU 5'
query=miR1061-3p, target=R03G_08883, score=4, range=114-131, stra
target 5' CAGCCUCCAUGCUGACA 3'
:: :::::
query 3' GUAAUAAGGUACGAUUGU 5'
query=miR1061-3p, target=R03G_05448, score=4, range=1535-1551,
strand=-1
target 5' CACU-UUCAAUGCUAACA 3'
:: : :::::
query 3' GUAAUAAGGUACGAUUGU 5'
query=miR1061-3p, target=R03G_08652, score=4, range=186-202, stra
target 5' CACU-UUCCAUGCCAACA 3'
:: : ::::: :::::
query 3' GUAAUAAGGUACGAUUGU 5'
query=miR5719, target=R03G_12938, score=3.5, range=2660-2678, str
target 5' AAGAC-GAUUAUUAUCACAG 3'
::: : :::::

```





query 3' UUCAGCCUAAUAGUAGUGUU 5'  
query=miR5821, target=R03G\_17015, score=0, range=1022-1042, stran  
target 5' CUCUACCAUCGUCUCCGUCCA 3'  
.....  
query 3' GAGAUUGGUAGCAGAGGCAGGU 5'  
query=miR5821, target=R03G\_10929, score=3.5, range=782-801, stran  
target 5' CUCU-CCGUCGUCUCCGUUCU 3'  
.... :.....  
query 3' GAGAUUGGUAGCAGAGGCAGGU 5'  
query=miR5821, target=R03G\_01864, score=3.5, range=782-801, stran  
target 5' CUCU-CCGUCGUCUCCGUUCC 3'  
.... :.....  
query 3' GAGAUUGGUAGCAGAGGCAGGU 5'  
query=miR5821, target=R03G\_11069, score=3.5, range=782-801, stran  
target 5' CUCU-CCGUCGUCUCCGUUCC 3'  
.... :.....  
query 3' GAGAUUGGUAGCAGAGGCAGGU 5'  
query=miR5821, target=R03G\_05170, score=3.5, range=782-801, stran  
target 5' CUCU-CCGUCGUCUCCGUUCU 3'  
.... :.....  
query 3' GAGAUUGGUAGCAGAGGCAGGU 5'  
query=miR5821, target=R03G\_04495, score=4, range=489-510, strand=  
target 5' CCCUACAAUCGUCUCUCGUCCA 3'  
: .... :.....  
query 3' GAGAUUGGUAGCAGAG-GCAGGU 5'  
query=miR5821, target=R03G\_10279, score=4, range=222-242, strand=  
target 5' CGGUAGCAUCGUCUCUGUCCA 3'  
: : :.....  
query 3' GAGAUUGGUAGCAGAGGCAGGU 5'  
query=miR5821, target=R03G\_14257, score=4, range=1135-1155, stran  
target 5' UUCCACUAUUGUCUCUGUCCA 3'  
... :.....  
query 3' GAGAUUGGUAGCAGAGGCAGGU 5'  
query=miR482d-3p, target=R03G\_13222, score=0, range=676-697, stra  
target 5' UGGCAUAGGUAGGGUCGGCCAA 3'  
.....  
query 3' ACCGUAUCCAUCCCAGCCGGUU 5'  
query=miR482d-3p, target=R03G\_14778, score=0, range=715-736, stra  
target 5' UGGCAUAGGUAGGGUCGGCCAA 3'  
.....  
query 3' ACCGUAUCCAUCCCAGCCGGUU 5'  
query=miR482d-3p, target=R03G\_11967, score=1, range=724-745, stra  
target 5' AGGCAUAGGUAGGGUCGGCCAA 3'  
.....  
query 3' ACCGUAUCCAUCCCAGCCGGUU 5'



query=miR6255, target=R03G\_14722, score=0, range=979-1000, strand  
target 5' ACUCAUCGUCCAUCUUUCCCA 3'  
::::::::::::::::::::::::::  
query 3' UGAGUAGCAGGUAAGAAAGGGU 5'  
query=miR6255, target=R03G\_05181, score=0, range=979-1000, strand  
target 5' ACUCAUCGUCCAUCUUUCCCA 3'  
::::::::::::::::::::::::::  
query 3' UGAGUAGCAGGUAAGAAAGGGU 5'  
query=miR6255, target=R03G\_13664, score=0, range=979-1000, strand  
target 5' ACUCAUCGUCCAUCUUUCCCA 3'  
::::::::::::::::::::::::::  
query 3' UGAGUAGCAGGUAAGAAAGGGU 5'  
query=miR6255, target=R03G\_02354, score=0, range=979-1000, strand  
target 5' ACUCAUCGUCCAUCUUUCCCA 3'  
::::::::::::::::::::::::::  
query 3' UGAGUAGCAGGUAAGAAAGGGU 5'  
query=miR6255, target=R03G\_08906, score=0, range=979-1000, strand  
target 5' ACUCAUCGUCCAUCUUUCCCA 3'  
::::::::::::::::::::::::::  
query 3' UGAGUAGCAGGUAAGAAAGGGU 5'  
query=miR6255, target=R03G\_13903, score=0, range=979-1000, strand  
target 5' ACUCAUCGUCCAUCUUUCCCA 3'  
::::::::::::::::::::::::::  
query 3' UGAGUAGCAGGUAAGAAAGGGU 5'  
query=miR6255, target=R03G\_05303, score=0, range=979-1000, strand  
target 5' ACUCAUCGUCCAUCUUUCCCA 3'  
::::::::::::::::::::::::::  
query 3' UGAGUAGCAGGUAAGAAAGGGU 5'  
query=miR6255, target=R03G\_05194, score=0, range=979-1000, strand  
target 5' ACUCAUCGUCCAUCUUUCCCA 3'  
::::::::::::::::::::::::::  
query 3' UGAGUAGCAGGUAAGAAAGGGU 5'  
query=miR6255, target=R03G\_13672, score=0, range=979-1000, strand  
target 5' ACUCAUCGUCCAUCUUUCCCA 3'  
::::::::::::::::::::::::::  
query 3' UGAGUAGCAGGUAAGAAAGGGU 5'  
query=miR6255, target=R03G\_11567, score=1, range=1636-1657, stran  
target 5' ACUCAUCAUCCAUCUUUCCCA 3'  
:::::::::: ::::::::::::::::::::  
query 3' UGAGUAGCAGGUAAGAAAGGGU 5'  
query=miR6255, target=R03G\_01923, score=1, range=928-949, strand=  
target 5' ACUCAUCAUCCAUCUUUCCCA 3'  
:::::::::: ::::::::::::::::::::  
query 3' UGAGUAGCAGGUAAGAAAGGGU 5'  
query=miR6255, target=R03G\_09419, score=1, range=799-820, strand=

```

target 5' ACUCAUCAUCCAUCUUUCCCA 3'
:::::::::: ::::::::::::::::::::
query 3' UGAGUAGCAGGUAAGAAAGGGU 5'
query=miR6255, target=R03G_11486, score=1, range=688-709, strand=
target 5' ACUCAUCAUCCAUCUUUCCCA 3'
:::::::::: ::::::::::::::::::::
query 3' UGAGUAGCAGGUAAGAAAGGGU 5'
query=miR6255, target=R03G_04104, score=1, range=676-697, strand=
target 5' ACUCAUCAUCCAUCUUUCCCA 3'
:::::::::: ::::::::::::::::::::
query 3' UGAGUAGCAGGUAAGAAAGGGU 5'
query=miR6255, target=R03G_04110, score=1, range=676-697, strand=
target 5' ACUCAUCAUCCAUCUUUCCCA 3'
:::::::::: ::::::::::::::::::::
query 3' UGAGUAGCAGGUAAGAAAGGGU 5'
query=miR6255, target=R03G_05535, score=1, range=364-385, strand=
target 5' ACUCAUCAUCCAUCUUUCCCA 3'
:::::::::: ::::::::::::::::::::
query 3' UGAGUAGCAGGUAAGAAAGGGU 5'
query=miR6255, target=R03G_11757, score=1, range=364-385, strand=
target 5' ACUCAUCAUCCAUCUUUCCCA 3'
:::::::::: ::::::::::::::::::::
query 3' UGAGUAGCAGGUAAGAAAGGGU 5'
query=miR6255, target=R03G_11765, score=1, range=364-385, strand=
target 5' ACUCAUCAUCCAUCUUUCCCA 3'
:::::::::: ::::::::::::::::::::
query 3' UGAGUAGCAGGUAAGAAAGGGU 5'
query=miR6255, target=R03G_10644, score=1, range=364-385, strand=
target 5' ACUCAUCAUCCAUCUUUCCCA 3'
:::::::::: ::::::::::::::::::::
query 3' UGAGUAGCAGGUAAGAAAGGGU 5'
query=miR6255, target=R03G_12139, score=1, range=352-373, strand=
target 5' ACUCAUCAUCCAUCUUUCCCA 3'
:::::::::: ::::::::::::::::::::
query 3' UGAGUAGCAGGUAAGAAAGGGU 5'
query=miR6255, target=R03G_05616, score=1, range=268-289, strand=
target 5' ACUCAUCAUCCAUCUUUCCCA 3'
:::::::::: ::::::::::::::::::::
query 3' UGAGUAGCAGGUAAGAAAGGGU 5'
query=miR6255, target=R03G_01528, score=1.5, range=547-568, stran
target 5' ACUCAUCAUCCAUCUUUCCCG 3'
:::::::::: ::::::::::::::::::::
query 3' UGAGUAGCAGGUAAGAAAGGGU 5'
query=miR6255, target=R03G_01518, score=1.5, range=352-373, stran
target 5' ACUCAUCAUCCAUCUUUCCCG 3'

```

::::: :::::  
query 3' UGAGUAGCAGGUAAGAAAGGGU 5'  
query=miR6255, target=R03G\_14467, score=2, range=508-529, strand=  
target 5' ACUCAUCAUCUAUUCUUUCCCA 3'  
::::: :::::  
query 3' UGAGUAGCAGGUAAGAAAGGGU 5'  
query=miR6255, target=R03G\_05603, score=2, range=238-259, strand=  
target 5' ACUCAUCAUUCUAUUCUUUCCCA 3'  
::::: :::::  
query 3' UGAGUAGCAGGUAAGAAAGGGU 5'  
query=miR6255, target=R03G\_08684, score=3, range=397-418, strand=  
target 5' AAACAUCAUCCAUCUUUCCCA 3'  
: ::::: :::::  
query 3' UGAGUAGCAGGUAAGAAAGGGU 5'  
query=miR6255, target=R03G\_14050, score=4, range=815-835, strand=  
target 5' ACUCAUC-UUCAUUCUUUACCA 3'  
::::: ::::: :::  
query 3' UGAGUAGCAGGUAAGAAAGGGU 5'  
query=miR9409, target=R03G\_11521, score=0, range=585-604, strand=  
target 5' GAAAUGAACUAUGACAAAA 3'  
::::: :::::  
query 3' CUUUUACUUGAUACUGUUUU 5'  
query=miR9409, target=R03G\_15711, score=0, range=1623-1642, stran  
target 5' GAAAUGAACUAUGACAAAA 3'  
::::: :::::  
query 3' CUUUUACUUGAUACUGUUUU 5'  
query=miR9409, target=R03G\_09539, score=0, range=1623-1642, stran  
target 5' GAAAUGAACUAUGACAAAA 3'  
::::: :::::  
query 3' CUUUUACUUGAUACUGUUUU 5'  
query=miR9409, target=R03G\_13796, score=0, range=1623-1642, stran  
target 5' GAAAUGAACUAUGACAAAA 3'  
::::: :::::  
query 3' CUUUUACUUGAUACUGUUUU 5'  
query=miR9409, target=R03G\_01512, score=3, range=1611-1630, stran  
target 5' GAAAUGAAUUACGACAAAA 3'  
::::: :::::  
query 3' CUUUUACUUGAUACUGUUUU 5'  
query=miR9409, target=R03G\_11616, score=3.5, range=2292-2311, str  
target 5' AAAAGAAAACUAUGACAAAA 3'  
::: :::::  
query 3' CUUUUACUUGAUACUGUUUU 5'  
query=miR9409, target=R03G\_03121, score=4, range=1614-1633, stran  
target 5' CAAAUGAAUUUAUGAUAAGA 3'  
::::: :::::

```

query 3' CUUUUACUUGAUACUGUUUU 5'
query=miR9409, target=R03G_14532, score=4, range=1614-1633, stran
target 5' CAAAUGAAUUAUGAUAGA 3'
.....:
query 3' CUUUUACUUGAUACUGUUUU 5'
query=miR9409, target=R03G_13807, score=4, range=876-895, strand=
target 5' CAAAUGAAUUAUGAUAGA 3'
.....:
query 3' CUUUUACUUGAUACUGUUUU 5'
query=miR9409, target=R03G_01426, score=4, range=876-895, strand=
target 5' CAAAUGAAUUAUGAUAGA 3'
.....:
query 3' CUUUUACUUGAUACUGUUUU 5'
query=miR9409, target=R03G_16107, score=4, range=1972-1991, stran
target 5' GAAAUCAACUGUUACAAA 3'
.....:
query 3' CUUUUACUUGAUACUGUUUU 5'
query=miR9409, target=R03G_07873, score=4, range=829-848, strand=
target 5' GUUGAUGAACUAUGGCAAAG 3'
: .....:
query 3' CUUUUACUUGAUACUGUUUU 5'
query=miR9409, target=R03G_13728, score=4, range=817-836, strand=
target 5' GUUGAUGAACUAUGGCAAAG 3'
: .....:
query 3' CUUUUACUUGAUACUGUUUU 5'
query=miR9409, target=R03G_05922, score=4, range=328-347, strand=
target 5' GUUGAUGAACUAUGGCAAAG 3'
: .....:
query 3' CUUUUACUUGAUACUGUUUU 5'
query=miR9409, target=R03G_05273, score=4, range=313-332, strand=
target 5' GUUGAUGAACUAUGGCAAAG 3'
: .....:
query 3' CUUUUACUUGAUACUGUUUU 5'
query=miR9409, target=R03G_16521, score=4, range=640-659, strand=
target 5' GAAAAGAACUAAGACAAA 3'
.....:
query 3' CUUUUACUUGAUACUGUUUU 5'
query=miR9409, target=R03G_06371, score=4, range=570-589, strand=
target 5' UGUAGCGAACUAUGACAAA 3'
. .: .....:
query 3' CUUUUACUUGAUACUGUUUU 5'
query=miR9409, target=R03G_03094, score=4, range=1883-1903, stran
target 5' GAAACACGAACUAUCACAAA 3'
.....:
query 3' CUUU-UACUUGAUACUGUUUU 5'

```

query=miR9409, target=R03G\_17057, score=4, range=440-459, strand=  
target 5' GCAAUUGAAUUGUGAUAAAA 3'  
: :::::::::::::::::::::  
query 3' CUUUUACUUGAUACUGUUUU 5'  
query=miR2199, target=R03G\_09540, score=0, range=3543-3563, stran  
target 5' GUCGAUCCGUUCUGGUUAUCA 3'  
:::::::::::::::::::  
query 3' CAGCUAGGCAAGACCAAUAGU 5'  
query=miR2199, target=R03G\_13797, score=0, range=1038-1058, stran  
target 5' GUCGAUCCGUUCUGGUUAUCA 3'  
:::::::::::::::::::  
query 3' CAGCUAGGCAAGACCAAUAGU 5'  
query=miR2199, target=R03G\_15712, score=0, range=1038-1058, stran  
target 5' GUCGAUCCGUUCUGGUUAUCA 3'  
:::::::::::::::::::  
query 3' CAGCUAGGCAAGACCAAUAGU 5'  
query=miR2199, target=R03G\_11523, score=0, range=1038-1058, stran  
target 5' GUCGAUCCGUUCUGGUUAUCA 3'  
:::::::::::::::::::  
query 3' CAGCUAGGCAAGACCAAUAGU 5'  
query=miR2199, target=R03G\_01171, score=4, range=54-74, strand=-1  
target 5' GUCGAUCCGGUCGGGUUAUCA 3'  
:::::::::: :: :::::::::::  
query 3' CAGCUAGGCAAGACCAAUAGU 5'  
query=miR6194, target=R03G\_10233, score=0, range=2142-2164, stran  
target 5' CUCGUGUGUCAAGAUCUUACUA 3'  
:::::::::::::::::::  
query 3' GAGCACACAGUUCUAGGGAUGAU 5'  
query=miR6194, target=R03G\_01744, score=0, range=2145-2167, stran  
target 5' CUCGUGUGUCAAGAUCUUACUA 3'  
:::::::::::::::::::  
query 3' GAGCACACAGUUCUAGGGAUGAU 5'  
query=miR6194, target=R03G\_04025, score=0, range=2142-2164, stran  
target 5' CUCGUGUGUCAAGAUCUUACUA 3'  
:::::::::::::::::::  
query 3' GAGCACACAGUUCUAGGGAUGAU 5'  
query=miR5059, target=R03G\_13235, score=4, range=1381-1399, stran  
target 5' UGUAG-GCUGUCCAGGAUCG 3'  
:: : :::::::::::::::::::::  
query 3' CCACCACGACGGGUCCUAGC 5'  
query=miR1093, target=R03G\_13221, score=0, range=473-491, strand=  
target 5' UCGUUGGCAAGAACAUCA 3'  
:::::::::::::::::::  
query 3' AGCAACCGUUCUUGUAGGU 5'  
query=miR1093, target=R03G\_13224, score=0, range=473-491, strand=





query 3' AGCAACCGUUCUUGUAGGU 5'  
query=miR1093, target=R03G\_14227, score=3.5, range=9-26, strand=-  
target 5' UUCUU-GCAAGAACAUCCC 3'  
:. :: :::::::::::::::  
query 3' AGCAACCGUUCUUGUAGGU 5'  
query=miR1093, target=R03G\_06872, score=4, range=657-675, strand=  
target 5' UCGUGGACAAGAACAUCU 3'  
:::: : :::::::::::::::  
query 3' AGCAACCGUUCUUGUAGGU 5'  
query=miR1093, target=R03G\_04142, score=4, range=2111-2129, stran  
target 5' UCAUUCGCAAGAGCAUCCC 3'  
:: :: :::::::::::::::  
query 3' AGCAACCGUUCUUGUAGGU 5'  
query=miR1093, target=R03G\_01055, score=4, range=525-543, strand=  
target 5' ACGUUGGUAAGAGUAUCCA 3'  
:::::::::::  
query 3' AGCAACCGUUCUUGUAGGU 5'  
query=miR1093, target=R03G\_14069, score=4, range=938-956, strand=  
target 5' ACGUUGGAAAGAACAUUCA 3'  
::::: :::::::::::::::  
query 3' AGCAACCGUUCUUGUAGGU 5'  
query=miR1093, target=R03G\_12235, score=4, range=204-222, strand=  
target 5' UCGAUGACAAGGACAUCCA 3'  
::: :: :::::::::::::::  
query 3' AGCAACCGUUCUUGUAGGU 5'  
query=miR1093, target=R03G\_09847, score=4, range=2115-2133, stran  
target 5' CAGUUUGCAAGAAUAUCCA 3'  
::: :::::::::::::::  
query 3' AGCAACCGUUCUUGUAGGU 5'  
query=miR1093, target=R03G\_16334, score=4, range=105-122, strand=  
target 5' UCCUUGGCAAGAAUA-CCA 3'  
:: ::::::::::::::: :::  
query 3' AGCAACCGUUCUUGUAGGU 5'  
query=miR1093, target=R03G\_06144, score=4, range=911-928, strand=  
target 5' UC-UUUGCAAGAACAUUUA 3'  
:: :: :::::::::::::::  
query 3' AGCAACCGUUCUUGUAGGU 5'  
query=miR1093, target=R03G\_10291, score=4, range=4109-4126, stran  
target 5' UC-UUGGCAAGUACAUCU 3'  
:: ::::::::::: :::::::  
query 3' AGCAACCGUUCUUGUAGGU 5'  
query=miR415, target=R03G\_07738, score=0, range=179-200, strand=1  
target 5' CUGCUUCUGCUUCUGUCCUUU 3'  
:::::::::::  
:::::::::::

query 3' GACGAAGACGAAGACAAGGAAA 5'  
query=miR415, target=R03G\_11537, score=0, range=179-200, strand=1  
target 5' CUGCUUCUGCUUCUGUCCUUU 3'  
.....  
query 3' GACGAAGACGAAGACAAGGAAA 5'  
query=miR415, target=R03G\_11236, score=0, range=179-200, strand=1  
target 5' CUGCUUCUGCUUCUGUCCUUU 3'  
.....  
query 3' GACGAAGACGAAGACAAGGAAA 5'  
query=miR415, target=R03G\_17248, score=0, range=167-188, strand=1  
target 5' CUGCUUCUGCUUCUGUCCUUU 3'  
.....  
query 3' GACGAAGACGAAGACAAGGAAA 5'  
query=miR415, target=R03G\_10041, score=0, range=167-188, strand=1  
target 5' CUGCUUCUGCUUCUGUCCUUU 3'  
.....  
query 3' GACGAAGACGAAGACAAGGAAA 5'  
query=miR415, target=R03G\_06730, score=0, range=137-158, strand=1  
target 5' CUGCUUCUGCUUCUGUCCUUU 3'  
.....  
query 3' GACGAAGACGAAGACAAGGAAA 5'  
query=miR415, target=R03G\_07981, score=0, range=137-158, strand=1  
target 5' CUGCUUCUGCUUCUGUCCUUU 3'  
.....  
query 3' GACGAAGACGAAGACAAGGAAA 5'  
query=miR415, target=R03G\_15897, score=0, range=137-158, strand=1  
target 5' CUGCUUCUGCUUCUGUCCUUU 3'  
.....  
query 3' GACGAAGACGAAGACAAGGAAA 5'  
query=miR415, target=R03G\_07720, score=0, range=137-158, strand=1  
target 5' CUGCUUCUGCUUCUGUCCUUU 3'  
.....  
query 3' GACGAAGACGAAGACAAGGAAA 5'  
query=miR415, target=R03G\_09602, score=0, range=137-158, strand=1  
target 5' CUGCUUCUGCUUCUGUCCUUU 3'  
.....  
query 3' GACGAAGACGAAGACAAGGAAA 5'  
query=miR415, target=R03G\_07306, score=0, range=137-158, strand=1  
target 5' CUGCUUCUGCUUCUGUCCUUU 3'  
.....  
query 3' GACGAAGACGAAGACAAGGAAA 5'  
query=miR415, target=R03G\_04211, score=0, range=137-158, strand=1  
target 5' CUGCUUCUGCUUCUGUCCUUU 3'  
.....  
query 3' GACGAAGACGAAGACAAGGAAA 5'

query=miR415, target=R03G\_07696, score=0, range=137-158, strand=1  
target 5' CUGCUUCUGCUUCUGUCCUUU 3'  
::::::::::::::::::::::::::  
query 3' GACGAAGACGAAGACAAGGAAA 5'  
query=miR415, target=R03G\_14551, score=0, range=137-158, strand=1  
target 5' CUGCUUCUGCUUCUGUCCUUU 3'  
::::::::::::::::::::::::::  
query 3' GACGAAGACGAAGACAAGGAAA 5'  
query=miR415, target=R03G\_09929, score=0, range=137-158, strand=1  
target 5' CUGCUUCUGCUUCUGUCCUUU 3'  
::::::::::::::::::::::::::  
query 3' GACGAAGACGAAGACAAGGAAA 5'  
query=miR415, target=R03G\_15147, score=0, range=113-134, strand=1  
target 5' CUGCUUCUGCUUCUGUCCUUU 3'  
::::::::::::::::::::::::::  
query 3' GACGAAGACGAAGACAAGGAAA 5'  
query=miR415, target=R03G\_10775, score=0, range=167-188, strand=1  
target 5' CUGCUUCUGCUUCUGUCCUUU 3'  
::::::::::::::::::::::::::  
query 3' GACGAAGACGAAGACAAGGAAA 5'  
query=miR415, target=R03G\_03584, score=0, range=95-116, strand=1  
target 5' CUGCUUCUGCUUCUGUCCUUU 3'  
::::::::::::::::::::::::::  
query 3' GACGAAGACGAAGACAAGGAAA 5'  
query=miR415, target=R03G\_09603, score=0, range=179-200, strand=1  
target 5' CUGCUUCUGCUUCUGUCCUUU 3'  
::::::::::::::::::::::::::  
query 3' GACGAAGACGAAGACAAGGAAA 5'  
query=miR415, target=R03G\_15890, score=0, range=161-182, strand=1  
target 5' CUGCUUCUGCUUCUGUCCUUU 3'  
::::::::::::::::::::::::::  
query 3' GACGAAGACGAAGACAAGGAAA 5'  
query=miR415, target=R03G\_13146, score=0, range=161-182, strand=1  
target 5' CUGCUUCUGCUUCUGUCCUUU 3'  
::::::::::::::::::::::::::  
query 3' GACGAAGACGAAGACAAGGAAA 5'  
query=miR415, target=R03G\_05425, score=0, range=167-188, strand=1  
target 5' CUGCUUCUGCUUCUGUCCUUU 3'  
::::::::::::::::::::::::::  
query 3' GACGAAGACGAAGACAAGGAAA 5'  
query=miR415, target=R03G\_17256, score=0, range=161-182, strand=1  
target 5' CUGCUUCUGCUUCUGUCCUUU 3'  
::::::::::::::::::::::::::  
query 3' GACGAAGACGAAGACAAGGAAA 5'  
query=miR415, target=R03G\_16137, score=0, range=161-182, strand=1



query 3' GACGAAGACGAAGACAAGGAAA 5'  
query=miR415, target=R03G\_12011, score=2, range=194-215, strand=1  
target 5' CUGCUUCUGCUUCUGUCCUGU 3'

query 3' GACGAAGACGAAGACAAGGAAA 5'  
query=miR415, target=R03G\_17433, score=2, range=191-212, strand=1  
target 5' CUGCUUCUGCUUCUGUCCUGU 3'

query 3' GACGAAGACGAAGACAAGGAAA 5'  
query=miR415, target=R03G\_16743, score=2, range=140-161, strand=1  
target 5' CUGCUUCUGCUUCUGUCCUGU 3'

query 3' GACGAAGACGAAGACAAGGAAA 5'  
query=miR415, target=R03G\_04659, score=2, range=128-149, strand=1  
target 5' CUGCUUCUGCUUCUGUCCUGU 3'

query 3' GACGAAGACGAAGACAAGGAAA 5'  
query=miR415, target=R03G\_07692, score=2, range=128-149, strand=1  
target 5' CUGCUUCUGCUUCUGUCCUGU 3'

query 3' GACGAAGACGAAGACAAGGAAA 5'  
query=miR415, target=R03G\_15879, score=2, range=194-215, strand=1  
target 5' CUGCUUCUGCUUCUGUCCUGU 3'

query 3' GACGAAGACGAAGACAAGGAAA 5'  
query=miR415, target=R03G\_10043, score=2, range=188-209, strand=1  
target 5' CUGCUUCUGCUUCUGUCCUGU 3'

query 3' GACGAAGACGAAGACAAGGAAA 5'  
query=miR415, target=R03G\_17460, score=2, range=218-239, strand=1  
target 5' CUGCUUCUGCUUCUGUCCUGU 3'

query 3' GACGAAGACGAAGACAAGGAAA 5'  
query=miR415, target=R03G\_13452, score=2, range=170-191, strand=1  
target 5' CUGCUUCUGCUUCUGUCCUGU 3'

query 3' GACGAAGACGAAGACAAGGAAA 5'  
query=miR415, target=R03G\_16369, score=2, range=173-194, strand=1  
target 5' CUGCUUCUGCUUCUGUCCUGU 3'

query 3' GACGAAGACGAAGACAAGGAAA 5'  
query=miR415, target=R03G\_00288, score=2, range=161-182, strand=1  
target 5' CUGCUUCUGCUUCUGUCCUGU 3'











:::: ::::::::::::::  
query 3' CAAGAUUCAGUUGGCAGGUU 5'  
query=miR5185l-3p, target=R03G\_01194, score=1, range=740-759, str  
target 5' GUUCCAAGUCAACCGUCCAA 3'  
:::: ::::::::::::::  
query 3' CAAGAUUCAGUUGGCAGGUU 5'  
query=miR5185l-3p, target=R03G\_10044, score=1, range=740-759, str  
target 5' GUUCCAAGUCAACCGUCCAA 3'  
:::: ::::::::::::::  
query 3' CAAGAUUCAGUUGGCAGGUU 5'  
query=miR5185l-3p, target=R03G\_11534, score=1, range=740-759, str  
target 5' GUUCCAAGUCAACCGUCCAA 3'  
:::: ::::::::::::::  
query 3' CAAGAUUCAGUUGGCAGGUU 5'  
query=miR5185l-3p, target=R03G\_03987, score=1, range=740-759, str  
target 5' GUUCCAAGUCAACCGUCCAA 3'  
:::: ::::::::::::::  
query 3' CAAGAUUCAGUUGGCAGGUU 5'  
query=miR5185l-3p, target=R03G\_15873, score=1, range=740-759, str  
target 5' GUUCCAAGUCAACCGUCCAA 3'  
:::: ::::::::::::::  
query 3' CAAGAUUCAGUUGGCAGGUU 5'  
query=miR5185l-3p, target=R03G\_10720, score=1, range=740-759, str  
target 5' GUUCCAAGUCAACCGUCCAA 3'  
:::: ::::::::::::::  
query 3' CAAGAUUCAGUUGGCAGGUU 5'  
query=miR5185l-3p, target=R03G\_05916, score=1, range=740-759, str  
target 5' GUUCCAAGUCAACCGUCCAA 3'  
:::: ::::::::::::::  
query 3' CAAGAUUCAGUUGGCAGGUU 5'  
query=miR5185l-3p, target=R03G\_07994, score=1, range=740-759, str  
target 5' GUUCCAAGUCAACCGUCCAA 3'  
:::: ::::::::::::::  
query 3' CAAGAUUCAGUUGGCAGGUU 5'  
query=miR5185l-3p, target=R03G\_07683, score=1, range=740-759, str  
target 5' GUUCCAAGUCAACCGUCCAA 3'  
:::: ::::::::::::::  
query 3' CAAGAUUCAGUUGGCAGGUU 5'  
query=miR5185l-3p, target=R03G\_16118, score=1, range=8-27, strand  
target 5' GUUCCAAGUCAACCGUCCAA 3'  
:::: ::::::::::::::  
query 3' CAAGAUUCAGUUGGCAGGUU 5'  
query=miR5185l-3p, target=R03G\_01735, score=1, range=740-759, str  
target 5' GUUCCAAGUCAACCGUCCAA 3'  
:::: ::::::::::::::



query=miR5185l-3p, target=R03G\_08835, score=3, range=50-69, stran  
target 5' GUUCCAAGUCAACCAUCCAA 3'  
:::: :::::::::: :::::  
query 3' CAAGAUUCAGUUGGCAGGUU 5'  
query=miR5185l-3p, target=R03G\_16377, score=4, range=65-84, stran  
target 5' GUUCCAAGUCAACAGUUCAA 3'  
:::: :::::::::: :::::  
query 3' CAAGAUUCAGUUGGCAGGUU 5'  
query=miR5185l-3p, target=R03G\_07465, score=4, range=1455-1474,  
strand=1  
target 5' AUUCUAUGUCAACCAUCCAA 3'  
:::: :::::::::: :::::  
query 3' CAAGAUUCAGUUGGCAGGUU 5'  
query=miR5185l-3p, target=R03G\_00951, score=4, range=1834-1853,  
strand=1  
target 5' CUUCAACGUCAAUCGUCCAA 3'  
::: : :::::::::::::::  
query 3' CAAGAUUCAGUUGGCAGGUU 5'  
query=miR5185l-3p, target=R03G\_12994, score=4, range=31-50, stran  
target 5' GAUAAAAGUCAAAUCGUCCAA 3'  
: : :::::::::::::::  
query 3' CAAGAUUCAGUUGGCAGGUU 5'  
query=miR1147.2, target=R03G\_08100, score=0, range=2769-2788,  
strand=-1  
target 5' UCUUCCAGACUUGCCGAGC 3'  
:::: :::::::::::::::  
query 3' AGAAAGGUCUGAACGGCUCG 5'  
query=miR1147.2, target=R03G\_04700, score=3, range=30-49, strand=  
target 5' UUUCUUCAGACUUGCUGAGC 3'  
::: :::::::::::::::  
query 3' AGAAAGGUCUGAACGGCUCG 5'  
query=miR1147.2, target=R03G\_00224, score=3, range=57-76, strand=  
target 5' UCUAUCCAGACUUGCUGAGG 3'  
::: :::::::::::::::  
query 3' AGAAAGGUCUGAACGGCUCG 5'  
query=miR1147.2, target=R03G\_09223, score=3.5, range=242-262, str  
target 5' CCUUCUUCAGACUUGCUGAGC 3'  
::: :::::::::::::::  
query 3' AGAA-AGGUCUGAACGGCUCG 5'  
query=miR1147.2, target=R03G\_08369, score=3.5, range=1268-1288,  
strand=1  
target 5' CCUUCUUCAGACUUGCUGAGC 3'  
::: :::::::::::::::  
query 3' AGAA-AGGUCUGAACGGCUCG 5'  
query=miR1147.2, target=R03G\_10416, score=3.5, range=242-262, str

target 5' CCUUCUUCAGACUUGCUGAGC 3'  
::: ::::::::::::::::::::  
query 3' AGAA-AGGUCUGAACGGCUCG 5'  
query=miR1147.2, target=R03G\_08103, score=3.5, range=916-936, str  
target 5' CCUUCUUCAGACUUGCUGAGC 3'  
::: ::::::::::::::::::::  
query 3' AGAA-AGGUCUGAACGGCUCG 5'  
query=miR1147.2, target=R03G\_13308, score=3.5, range=1100-1120,  
strand=1  
target 5' CCUUCUUCAGACUUGCUGAGC 3'  
::: ::::::::::::::::::::  
query 3' AGAA-AGGUCUGAACGGCUCG 5'  
query=miR1147.2, target=R03G\_06788, score=3.5, range=242-262, str  
target 5' CCUUCUUCAGACUUGCUGAGC 3'  
::: ::::::::::::::::::::  
query 3' AGAA-AGGUCUGAACGGCUCG 5'  
query=miR1147.2, target=R03G\_07829, score=3.5, range=242-262, str  
target 5' CCUUCUUCAGACUUGCUGAGC 3'  
::: ::::::::::::::::::::  
query 3' AGAA-AGGUCUGAACGGCUCG 5'  
query=miR1147.2, target=R03G\_05806, score=4, range=13570-13588,  
strand=-1  
target 5' UCUUUCCAGACUUG-UGGGC 3'  
:::::::::::::::::: .::::  
query 3' AGAAAGGUCUGAACGGCUCG 5'  
query=miR1147.2, target=R03G\_13132, score=4, range=414-432, stran  
target 5' UC-UUCCAGACUUGUCGAUC 3'  
:: :::::::::::::::::::: :  
query 3' AGAAAGGUCUGAACGGCUCG 5'  
query=miR6274b-3p, target=R03G\_13001, score=0, range=2234-2253,  
strand=1  
target 5' CUAUUUUCGGUCUACCACAA 3'  
::::::::::::::::::  
query 3' GAUAAAAGCCAGAUGGUGUU 5'  
query=miR6274b-3p, target=R03G\_06596, score=0, range=2234-2253,  
strand=1  
target 5' CUAUUUUCGGUCUACCACAA 3'  
::::::::::::::::::  
query 3' GAUAAAAGCCAGAUGGUGUU 5'  
query=miR6274b-3p, target=R03G\_03002, score=0, range=2234-2253,  
strand=1  
target 5' CUAUUUUCGGUCUACCACAA 3'  
::::::::::::::::::  
query 3' GAUAAAAGCCAGAUGGUGUU 5'  
query=miR6274b-3p, target=R03G\_15390, score=0, range=524-543, str



query=miR2111-3p, target=R03G\_06346, score=4, range=258-276, str  
target 5' GGUAAACCCAUCUGAGUUC 3'  
::::: ::::: :::  
query 3' CCAUUAGGGUGGACUGAAG 5'  
query=miR2111-3p, target=R03G\_16693, score=4, range=414-433, str  
target 5' UGUCAUCCCACCUGACCUUC 3'  
:: ::::: :::  
query 3' CCAUUAGGGUGGACU-GAAG 5'  
query=miR2111-3p, target=R03G\_12527, score=4, range=414-433, str  
target 5' UGUUAUCCCACCUGACCUUC 3'  
:: ::::: :::  
query 3' CCAUUAGGGUGGACU-GAAG 5'  
query=miR2111-3p, target=R03G\_07311, score=4, range=414-433, str  
target 5' UGUCAUCCCACCUGACCUUC 3'  
:: ::::: :::  
query 3' CCAUUAGGGUGGACU-GAAG 5'  
query=miR2111-3p, target=R03G\_01614, score=4, range=414-433, str  
target 5' UGUCAUCCCACCUGACCUUC 3'  
:: ::::: :::  
query 3' CCAUUAGGGUGGACU-GAAG 5'  
query=miR2111-3p, target=R03G\_10804, score=4, range=414-433, str  
target 5' UGUCAUCCCACCUGACCUUC 3'  
:: ::::: :::  
query 3' CCAUUAGGGUGGACU-GAAG 5'  
query=miR2111-3p, target=R03G\_12532, score=4, range=414-433, str  
target 5' UGUCAUCCCACCUGACCUUC 3'  
:: ::::: :::  
query 3' CCAUUAGGGUGGACU-GAAG 5'  
query=miR2111-3p, target=R03G\_01936, score=4, range=414-433, str  
target 5' UGUCAUCCCACCUGACCUUC 3'  
:: ::::: :::  
query 3' CCAUUAGGGUGGACU-GAAG 5'  
query=miR2111-3p, target=R03G\_03619, score=4, range=414-433, str  
target 5' UGUCAUCCCACCUGACCUUC 3'  
:: ::::: :::  
query 3' CCAUUAGGGUGGACU-GAAG 5'  
query=miR2111-3p, target=R03G\_02821, score=4, range=414-433, str  
target 5' UGUCAUCCCACCUGACCUUC 3'  
:: ::::: :::  
query 3' CCAUUAGGGUGGACU-GAAG 5'  
query=miR2111-3p, target=R03G\_00242, score=4, range=414-433, str  
target 5' UGUCAUCCCACCUGACCUUC 3'  
:: ::::: :::  
query 3' CCAUUAGGGUGGACU-GAAG 5'  
query=miR2111-3p, target=R03G\_00295, score=4, range=414-433, str





```
:: :::::::::::::::::::::
query 3' UC-UUAAGUACCGUAAAGAAUUAU 5'
query=miR1428b, target=R03G_12350, score=4, range=1371-1392, stran
target 5' UAAAUUCAUGGCAUUUCUAAUA 3'
::::::::::::::::::: :::
query 3' UCUUAAGUACCGUAAAGAAUUAU 5'
query=miR825-3p, target=R03G_14363, score=0, range=451-473, stran
target 5' GUUAAUGCACCUUAUCGAGACCA 3'
:::::::::::::::::::
query 3' CAAUUACGUGGAAUAGCUCUGGU 5'
query=miR825-3p, target=R03G_13270, score=1, range=493-515, stran
target 5' GAUAAUGCACCUUAUCGAGACCA 3'
: :::::::::::::::::::::
query 3' CAAUUACGUGGAAUAGCUCUGGU 5'
query=miR825-3p, target=R03G_10774, score=1, range=460-482, stran
target 5' GAUAAUGCACCUUAUCGAGACCA 3'
: :::::::::::::::::::::
query 3' CAAUUACGUGGAAUAGCUCUGGU 5'
query=miR825-3p, target=R03G_13863, score=1, range=193-215, stran
target 5' GAUAAUGCACCUUAUCGAGACCA 3'
: :::::::::::::::::::::
query 3' CAAUUACGUGGAAUAGCUCUGGU 5'
query=miR825-3p, target=R03G_13741, score=1, range=493-515, stran
target 5' GAUAAUGCACCUUAUCGAGACCA 3'
: :::::::::::::::::::::
query 3' CAAUUACGUGGAAUAGCUCUGGU 5'
query=miR825-3p, target=R03G_08849, score=1, range=493-515, stran
target 5' GAUAAUGCACCUUAUCGAGACCA 3'
: :::::::::::::::::::::
query 3' CAAUUACGUGGAAUAGCUCUGGU 5'
query=miR825-3p, target=R03G_05936, score=1, range=493-515, stran
target 5' GAUAAUGCACCUUAUCGAGACCA 3'
: :::::::::::::::::::::
query 3' CAAUUACGUGGAAUAGCUCUGGU 5'
query=miR825-3p, target=R03G_14979, score=1, range=493-515, stran
target 5' GAUAAUGCACCUUAUCGAGACCA 3'
: :::::::::::::::::::::
query 3' CAAUUACGUGGAAUAGCUCUGGU 5'
query=miR825-3p, target=R03G_17276, score=1.5, range=583-605, str
target 5' GAUAAUGCACCUUAUCGAGACCG 3'
: :::::::::::::::::::::
query 3' CAAUUACGUGGAAUAGCUCUGGU 5'
query=miR825-3p, target=R03G_05420, score=2, range=354-376, stran
target 5' GGAAAUGCACCUUAUCGAGACCA 3'
: :::::::::::::::::::::
```







query=miR7542, target=R03G\_05619, score=0.5, range=1287-1306,  
strand=-1  
target 5' UAUCAUCUAUGAACGCAACA 3'  
.....  
query 3' AUGGUAGAUACUUGCGUUGU 5'  
query=miR7542, target=R03G\_06427, score=0.5, range=2736-2755,  
strand=-1  
target 5' UAUCAUCUAUGAACGCAACA 3'  
.....  
query 3' AUGGUAGAUACUUGCGUUGU 5'  
query=miR7542, target=R03G\_09965, score=0.5, range=3144-3163,  
strand=-1  
target 5' UAUCAUCUAUGAACGCAACA 3'  
.....  
query 3' AUGGUAGAUACUUGCGUUGU 5'  
query=miR7542, target=R03G\_13920, score=0.5, range=3144-3163,  
strand=-1  
target 5' UAUCAUCUAUGAACGCAACA 3'  
.....  
query 3' AUGGUAGAUACUUGCGUUGU 5'  
query=miR7542, target=R03G\_03547, score=0.5, range=3144-3163,  
strand=-1  
target 5' UAUCAUCUAUGAACGCAACA 3'  
.....  
query 3' AUGGUAGAUACUUGCGUUGU 5'  
query=miR7542, target=R03G\_02691, score=0.5, range=6633-6652,  
strand=-1  
target 5' UAUCAUCUAUGAACGCAACA 3'  
.....  
query 3' AUGGUAGAUACUUGCGUUGU 5'  
query=miR7542, target=R03G\_06442, score=0.5, range=3801-3820,  
strand=-1  
target 5' UAUCAUCUAUGAACGCAACA 3'  
.....  
query 3' AUGGUAGAUACUUGCGUUGU 5'  
query=miR7542, target=R03G\_11776, score=1.5, range=234-253, stran  
target 5' UAUCAUCUAUGAAUGCAACA 3'  
.....  
query 3' AUGGUAGAUACUUGCGUUGU 5'  
query=miR7542, target=R03G\_13867, score=1.5, range=3060-3079,  
strand=-1  
target 5' UAUCAUCUAUGAAUGCAACA 3'  
.....  
query 3' AUGGUAGAUACUUGCGUUGU 5'  
query=miR7542, target=R03G\_13749, score=1.5, range=1707-1726,

strand=-1  
target 5' UAUCAUCUAUGAAUGCAACA 3'  
.....  
query 3' AUGGUAGAUACUUGCGUUGU 5'  
query=miR7542, target=R03G\_04115, score=1.5, range=87-106, strand  
target 5' UAUCAUCUAUGAAUGCAACA 3'  
.....  
query 3' AUGGUAGAUACUUGCGUUGU 5'  
query=miR7542, target=R03G\_01613, score=1.5, range=1395-1414,  
strand=-1  
target 5' UAUCAUCUAUGAAUGCAACA 3'  
.....  
query 3' AUGGUAGAUACUUGCGUUGU 5'  
query=miR7542, target=R03G\_10558, score=1.5, range=897-916, stran  
target 5' UAUCAUCUAUGAAUGCAACA 3'  
.....  
query 3' AUGGUAGAUACUUGCGUUGU 5'  
query=miR7542, target=R03G\_17326, score=1.5, range=2976-2995,  
strand=-1  
target 5' UAUCAUCUAUGAAUGCAACA 3'  
.....  
query 3' AUGGUAGAUACUUGCGUUGU 5'  
query=miR7542, target=R03G\_14355, score=1.5, range=1350-1369,  
strand=-1  
target 5' UAUCAUCUAUGAAUGCAACA 3'  
.....  
query 3' AUGGUAGAUACUUGCGUUGU 5'  
query=miR7542, target=R03G\_05279, score=1.5, range=90-109, strand  
target 5' UAUCAUCUAUGAAUGCAACA 3'  
.....  
query 3' AUGGUAGAUACUUGCGUUGU 5'  
query=miR7542, target=R03G\_17371, score=1.5, range=3099-3118,  
strand=-1  
target 5' UAUCAUCUAUGAAUGCAACA 3'  
.....  
query 3' AUGGUAGAUACUUGCGUUGU 5'  
query=miR7542, target=R03G\_15250, score=1.5, range=3099-3118,  
strand=-1  
target 5' UAUCAUCUAUGAAUGCAACA 3'  
.....  
query 3' AUGGUAGAUACUUGCGUUGU 5'  
query=miR7542, target=R03G\_12788, score=3, range=348-366, strand=  
target 5' UACGA-CUAUGAACGCAAUA 3'  
... : .....  
query 3' AUGGUAGAUACUUGCGUUGU 5'

query=miR7542, target=R03G\_13422, score=4, range=618-637, strand=  
target 5' UGCUGUCUAUGAACUCAACG 3'  
.....  
query 3' AUGGUAGAUACUUGCGUUGU 5'  
query=miR7542, target=R03G\_12316, score=4, range=594-613, strand=  
target 5' UGCUGUCUAUGAACUCAACG 3'  
.....  
query 3' AUGGUAGAUACUUGCGUUGU 5'  
query=miR7542, target=R03G\_13406, score=4, range=594-613, strand=  
target 5' UGCUGUCUAUGAACUCAACG 3'  
.....  
query 3' AUGGUAGAUACUUGCGUUGU 5'  
query=miR7542, target=R03G\_01494, score=4, range=1754-1773, stran  
target 5' AAUUGUUUAUGAACGCAACC 3'  
.....  
query 3' AUGGUAGAUACUUGCGUUGU 5'  
query=miR7542, target=R03G\_11117, score=4, range=294-312, strand=  
target 5' UACCAUCUAUGAA-GUAGCA 3'  
.....  
query 3' AUGGUAGAUACUUGCGUUGU 5'  
query=miR7542, target=R03G\_02560, score=4, range=1093-1113, stran  
target 5' UGUCAUCUUAUGAAUGCAACU 3'  
.....  
query 3' AUGGUAG-AUACUUGCGUUGU 5'  
query=miR7542, target=R03G\_16285, score=4, range=53-72, strand=1  
target 5' UUCGAUCUAUGAAUGCAGCA 3'  
: : .....  
query 3' AUGGUAGAUACUUGCGUUGU 5'  
query=miR7542, target=R03G\_17390, score=4, range=594-614, strand=  
target 5' UGCUACCUAUGAACGCAAGCA 3'  
.....  
query 3' AUGGUAGAUACUUGCGUU-GU 5'  
query=miR7542, target=R03G\_02872, score=4, range=3755-3775, stran  
target 5' CACCAGUCUAUGAACGCAAUC 3'  
.....  
query 3' AUGGU-AGAUACUUGCGUUGU 5'  
query=miR7542, target=R03G\_06268, score=4, range=140-160, strand=  
target 5' AACCUUCUAUGAACAGCAACA 3'  
.....  
query 3' AUGGUAGAUACUUG-CGUUGU 5'  
query=miR7542, target=R03G\_15995, score=4, range=375-393, strand=  
target 5' UGCCAGCUAUGAA-GCAACG 3'  
.....  
query 3' AUGGUAGAUACUUGCGUUGU 5'  
query=miR9484, target=R03G\_04998, score=2.5, range=206-223, stran



```
target 5' GUGGACUUCCCUUGCCUC 3'
:. :.....:
query 3' CGGCUGAAGGGAACGGAU 5'
query=miR9484, target=R03G_01232, score=3, range=1021-1037, stran
target 5' GCCGAC-UCCCUUGUCUA 3'
:.....: :.....:
query 3' CGGCUGAAGGGAACGGAU 5'
query=miR9484, target=R03G_01236, score=3, range=1021-1037, stran
target 5' GCCGAC-UCCCUUGUCUA 3'
:.....: :.....:
query 3' CGGCUGAAGGGAACGGAU 5'
query=miR9484, target=R03G_19000, score=3, range=2331-2348, stran
target 5' GCCGACUUCCCUUAUCUA 3'
:.....: :.....:
query 3' CGGCUGAAGGGAACGGAU 5'
query=miR9484, target=R03G_19002, score=3, range=2331-2348, stran
target 5' GCCGACUUCCCUUAUCUA 3'
:.....: :.....:
query 3' CGGCUGAAGGGAACGGAU 5'
query=miR9484, target=R03G_05548, score=3.5, range=924-941, stran
target 5' GAUGACUUCCUUGCCUU 3'
: :.....:
query 3' CGGCUGAAGGGAACGGAU 5'
query=miR9484, target=R03G_10660, score=3.5, range=893-910, stran
target 5' GUCUACUUCCUUGUCUA 3'
:. :.....:
query 3' CGGCUGAAGGGAACGGAU 5'
query=miR9484, target=R03G_04265, score=3.5, range=1295-1311,
strand=-1
target 5' GCUGACUU-UCUUGCCUA 3'
:.....: :.....:
query 3' CGGCUGAAGGGAACGGAU 5'
query=miR9484, target=R03G_01983, score=4, range=293-310, strand=
target 5' GUCGGCAUCCUUGCCUA 3'
:.....: :.....:
query 3' CGGCUGAAGGGAACGGAU 5'
query=miR9484, target=R03G_15411, score=4, range=527-544, strand=
target 5' GCCUGUUCCUUGCCUG 3'
:.....: :.....:
query 3' CGGCUGAAGGGAACGGAU 5'
query=miR9484, target=R03G_00332, score=4, range=750-767, strand=
target 5' CUCUACUUCCUUGCCUG 3'
:. :.....:
query 3' CGGCUGAAGGGAACGGAU 5'
query=miR9484, target=R03G_08415, score=4, range=750-767, strand=
```

target 5' CUCUACUUUCCUUGCCUG 3'  
.: :.....  
query 3' CGGCUGAAGGGAACGGAU 5'  
query=miR9484, target=R03G\_12433, score=4, range=4094-4111, stran  
target 5' GUCAUCUUCCUUGCCUG 3'  
.: :.....  
query 3' CGGCUGAAGGGAACGGAU 5'  
query=miR9484, target=R03G\_03073, score=4, range=965-982, strand=  
target 5' GUGAACUUUCCUUGCCUG 3'  
.: :.....  
query 3' CGGCUGAAGGGAACGGAU 5'  
query=miR9484, target=R03G\_11428, score=4, range=136-152, strand=  
target 5' GCAGACUU-CCUUGCCUU 3'  
.: :..... :.....  
query 3' CGGCUGAAGGGAACGGAU 5'  
query=miR9484, target=R03G\_01278, score=4, range=367-383, strand=  
target 5' GCUGGC-UCCCUUGUCUA 3'  
.: :..... :.....  
query 3' CGGCUGAAGGGAACGGAU 5'  
query=miR9484, target=R03G\_10866, score=4, range=48-65, strand=-1  
target 5' ACCGACUUUCCUUGUUUA 3'  
.: :..... :.....  
query 3' CGGCUGAAGGGAACGGAU 5'  
query=miR9484, target=R03G\_13835, score=4, range=8232-8249, stran  
target 5' UCAGACUUUCUUGCUUA 3'  
.: :..... :.....  
query 3' CGGCUGAAGGGAACGGAU 5'  
query=miR9484, target=R03G\_01754, score=4, range=350-367, strand=  
target 5' GCAGGCUGCCCUUGCCUG 3'  
.: :..... :.....  
query 3' CGGCUGAAGGGAACGGAU 5'  
query=miR9484, target=R03G\_03392, score=4, range=1112-1128, stran  
target 5' GCCG-UUUCCCUUGCCAA 3'  
.: :..... :..... :  
query 3' CGGCUGAAGGGAACGGAU 5'  
query=miR9484, target=R03G\_07018, score=4, range=1009-1027, stran  
target 5' GCCCAUCUUCCCUUGUCUU 3'  
.: :..... :..... :  
query 3' CGGCU-GAAGGGAACGGAU 5'  
query=miR9484, target=R03G\_15064, score=4, range=5719-5735, stran  
target 5' GCC-UUUCCCUUGUCUU 3'  
.: :..... :..... :  
query 3' CGGCUGAAGGGAACGGAU 5'  
query=miR9557-5p, target=R03G\_06039, score=3.5, range=1108-1126,  
strand=1

```

target 5' GAAC-AAUUGAAACGCAAAG 3'
:: : : ::::::::::::::.
query 3' CUGGCUCAACUUUGCGUUUU 5'
query=miR9557-5p, target=R03G_02762, score=4, range=552-571, str
target 5' GAGCGAGUUGAGACGCCAAA 3'
:: ::::::::::::::: :::
query 3' CUGGCUCAACUUUGCGUUUU 5'
query=miR9557-5p, target=R03G_05103, score=4, range=1044-1063,
strand=1
target 5' UACCGUGUUGAAACGUAAAA 3'
:::: :::::::::::::::
query 3' CUGGCUCAACUUUGCGUUUU 5'
query=miR9557-5p, target=R03G_03818, score=4, range=3583-3602,
strand=1
target 5' GAACGACUUGAAAAGCAAAA 3'
:: ::: ::::::::::: ::::::::::
query 3' CUGGCUCAACUUUGCGUUUU 5'
query=miR9557-5p, target=R03G_06261, score=4, range=1638-1657,
strand=-1
target 5' CAACGACUUGAAACGCAAAC 3'
: ::: :::::::::::::::
query 3' CUGGCUCAACUUUGCGUUUU 5'
query=miR159a, target=R03G_01784, score=3, range=322-341, strand=
target 5' AGAAUUUCCUUCAAUCCAAA 3'
::: .::::::::::::::::::
query 3' UCUCGAGGGAAGUUAGGUUU 5'
query=miR159a, target=R03G_12083, score=3.5, range=46-65, strand=
target 5' AGAAGUCCUUCAAUCCAAG 3'
::: ::::::::::::::::::::
query 3' UCUCGAGGGAAGUUAGGUUU 5'
query=miR159a, target=R03G_14268, score=3.5, range=37-55, strand=
target 5' ACAGCU-UCUCAAUCCAAG 3'
: :::: .::::::::::::::::::
query 3' UCUCGAGGGAAGUUAGGUUU 5'
query=miR159a, target=R03G_02134, score=3.5, range=401-420, stran
target 5' GGAGCUACAUCAAUCCAAA 3'
.::::: : :::::::::::::::
query 3' UCUCGAGGGAAGUUAGGUUU 5'
query=miR159a, target=R03G_00458, score=4, range=48-66, strand=1
target 5' UGAGC-GCCUCAAUCCGAA 3'
:::: ::::::::::::::::::::
query 3' UCUCGAGGGAAGUUAGGUUU 5'
query=miR159a, target=R03G_11680, score=4, range=801-819, strand=
target 5' AGAGAU-CAUCAAUCCAAA 3'
:::: : : :::::::::::::::

```

```

query 3' UCUCGAGGGAAGUUAGGUUU 5'
query=miR159a, target=R03G_06157, score=4, range=667-687, strand=
target 5' AGAGCUUUCUAUCGAUCCAAA 3'
.....: :.....:
query 3' UCUCGAGGGA-AGUUAGGUUU 5'
query=miR7532a, target=R03G_01231, score=3, range=166-185, strand
target 5' CUAUUGACCAAAGGCUGUUC 3'
.....: :.....:
query 3' GGUAGCUGGUCUCCGACAAG 5'
query=miR7532a, target=R03G_04988, score=4, range=239-257, strand
target 5' CUA-CGAGCAGAGGCUGUUU 3'
.: :.: :.....:
query 3' GGUAGCUGGUCUCCGACAAG 5'
query=miR7532a, target=R03G_15725, score=4, range=1148-1166, stra
target 5' ACACCGACCAGAGGCU-UUC 3'
.: :.....: :.:
query 3' GGUAGCUGGUCUCCGACAAG 5'
query=miR7532a, target=R03G_12815, score=4, range=683-701, strand
target 5' CCUUUGA-CAGAGGCUGUUU 3'
.: :.: :.....:
query 3' GGUAGCUGGUCUCCGACAAG 5'
query=miR7532a, target=R03G_04076, score=4, range=1063-1083, stra
target 5' CCAUCGGUCAGCAGGCUGUUG 3'
.....: :.....:
query 3' GGUAGCUGGUC-UCCGACAAG 5'
query=miR4244, target=R03G_04497, score=1, range=221-240, strand=
target 5' CACAUCUCCAGGAACAAUUA 3'
.....: :.....:
query 3' GUGUAGAGGUCCUUGUUGAU 5'
query=miR4244, target=R03G_02365, score=1, range=221-240, strand=
target 5' CACACCUCCAGGAACAACUA 3'
.: :.....: :.:
query 3' GUGUAGAGGUCCUUGUUGAU 5'
query=miR4244, target=R03G_13029, score=1, range=155-174, strand=
target 5' CACAACUCCAGGAACAACUA 3'
.: :.....: :.:
query 3' GUGUAGAGGUCCUUGUUGAU 5'
query=miR4244, target=R03G_16979, score=1, range=71-90, strand=1
target 5' CACACCUCCAGGAACAACUA 3'
.: :.....: :.:
query 3' GUGUAGAGGUCCUUGUUGAU 5'
query=miR4244, target=R03G_11695, score=1.5, range=221-240, stran
target 5' CAUACCUCCAGGAACAACUA 3'
.: :.....: :.:
query 3' GUGUAGAGGUCCUUGUUGAU 5'

```

query=miR4244, target=R03G\_12568, score=2, range=464-483, strand=  
target 5' CACACCUUCAGGAACAACUA 3'  
:::: :::::::::::::::  
query 3' GUGUAGAGGUCCUUGUUGAU 5'  
query=miR4244, target=R03G\_12482, score=4, range=617-637, strand=  
target 5' CAUUUUUCCAGGAACAACCA 3'  
:: ::::::::::::::: :  
query 3' GU-GUAGAGGUCCUUGUUGAU 5'  
query=miR4244, target=R03G\_02714, score=4, range=705-723, strand=  
target 5' CACAU-UCAAGGAACAAUUA 3'  
::::: :: :::::::::::::::  
query 3' GUGUAGAGGUCCUUGUUGAU 5'  
query=miR4244, target=R03G\_03106, score=4, range=186-204, strand=  
target 5' UA-AUCGUCAGGAACAACUG 3'  
. : :: ::::::::::::::.  
query 3' GUGUAGAGGUCCUUGUUGAU 5'  
query=miR4244, target=R03G\_13937, score=4, range=184-202, strand=  
target 5' CA-AACACCAGGAACAGCUA 3'  
:: : : :::::::::::::::  
query 3' GUGUAGAGGUCCUUGUUGAU 5'  
query=miR4244, target=R03G\_11363, score=4, range=911-930, strand=  
target 5' UACAGUUUCAGGAACAACUU 3'  
. : : :::::::::::::::  
query 3' GUGUAGAGGUCCUUGUUGAU 5'  
query=miR4244, target=R03G\_04292, score=4, range=1586-1606, stran  
target 5' UACAGCUUCCAGGAACAAUUG 3'  
. : : : ::::::::::::::.  
query 3' GUGUAG-AGGUCCUUGUUGAU 5'  
query=miR912, target=R03G\_09591, score=4, range=1021-1042, strand  
target 5' UUCUGGGUUGGUGAUCAAUCCG 3'  
. : : : ::::::::::::::.  
query 3' CGGUCCCUACCACUAGUUAGGU 5'  
query=miR912, target=R03G\_11488, score=4, range=1461-1482, strand  
target 5' ACUAAGAGUGGUGAUCAAUCCA 3'  
: : : : :::::::::::::::  
query 3' CGGUCCCUACCACUAGUUAGGU 5'  
query=miR2595, target=R03G\_15743, score=0, range=946-966, strand=  
target 5' AGACAGAGAAGUAGAAAUGUA 3'  
: : : : : :::::::::::::::  
query 3' UCUGUCUCUUCAUCUUUACAU 5'  
query=miR2595, target=R03G\_16060, score=4, range=18-38, strand=1  
target 5' ACAAAAAGAAGUAGAAAUGUU 3'  
: : : : : :::::::::::::::  
query 3' UCUGUCUCUUCAUCUUUACAU 5'  
query=miR2595, target=R03G\_07199, score=4, range=98-119, strand=1

```

target 5' AAAGAGAUGAAGUAGAAAUGUU 3'
: : ::: :
query 3' UUGUCU-CUUCAUCUUUACAU 5'
query=miR2595, target=R03G_08289, score=4, range=26-45, strand=1
target 5' AGAAAAAGAA-UAGAAAUGUA 3'
::: : :
query 3' UUGUCUCUUCAUCUUUACAU 5'
query=miR2595, target=R03G_11137, score=4, range=206-225, strand=
target 5' AGAUA-AGAAGUAGACAUGUG 3'
::: : :
query 3' UUGUCUCUUCAUCUUUACAU 5'
query=miR166d-5p, target=R03G_00164, score=4, range=2528-2546,
strand=1
target 5' CUAGA-CCAGUAACAUUUC 3'
:: : :
query 3' GAGCUCGGUCUGUUGUAAGG 5'
query=miR166d-5p, target=R03G_02325, score=4, range=320-338, stra
target 5' CUCGUACCAGACAA-AUUCC 3'
::: : :
query 3' GAGCUCGGUCUGUUGUAAGG 5'
query=miR166d-5p, target=R03G_12331, score=4, range=1087-1105,
strand=-1
target 5' AUCGA-ACAGUAACAUUCC 3'
::: : :
query 3' GAGCUCGGUCUGUUGUAAGG 5'
query=miR166d-5p, target=R03G_07902, score=4, range=192-210, stra
target 5' CUC-AUCCAGACAACAGUCC 3'
:: : :
query 3' GAGCUCGGUCUGUUGUAAGG 5'
query=miR156c, target=R03G_03020, score=2.5, range=3298-3317,
strand=-1
target 5' UGCUUGUUCUCUUCUGUCAC 3'
::: : :
query 3' ACGAGCCAGAGAAGACAGUU 5'
query=miR156c, target=R03G_03236, score=3.5, range=3770-3788, str
target 5' AGCAU-GUCUCUUCUGUCA 3'
:: . :
query 3' ACGAGCCAGAGAAGACAGUU 5'
query=miR156c, target=R03G_02254, score=3.5, range=1-20, strand=-
target 5' UAUUCGGUCUUUUCUGUCAU 3'
: . :
query 3' ACGAGCCAGAGAAGACAGUU 5'
query=miR156c, target=R03G_05443, score=3.5, range=28-47, strand=
target 5' UGCUCUGUCUCUUCUGUGAG 3'
::: : :

```

query 3' ACGAGCCAGAGAAGACAGUU 5'  
query=miR156c, target=R03G\_02539, score=3.5, range=257-276, stran  
target 5' UGCUUGUUCUAUUCUGUCA 3'  
.....: ::: .....

query 3' ACGAGCCAGAGAAGACAGUU 5'  
query=miR156c, target=R03G\_10375, score=3.5, range=130-148, stran  
target 5' UGC-CUGUUUCUUCUGUCAG 3'  
::: : .....:

query 3' ACGAGCCAGAGAAGACAGUU 5'  
query=miR156c, target=R03G\_14374, score=4, range=386-404, strand=  
target 5' UGCUCGCUUUCUU-UGUCA 3'  
.....: .....:

query 3' ACGAGCCAGAGAAGACAGUU 5'  
query=miR156c, target=R03G\_10007, score=4, range=264-284, strand=  
target 5' UGCUCGGUUUGCUUCUGUUA 3'  
.....: .....:

query 3' ACGAGCCAGA-GAAGACAGUU 5'  
query=miR156c, target=R03G\_14239, score=4, range=1023-1041, stran  
target 5' UG-UCGGUCUCUUUUUGUUGA 3'  
:: .....:

query 3' ACGAGCCAGAGAAGACAGUU 5'  
query=miR156c, target=R03G\_02086, score=4, range=616-635, strand=  
target 5' UGGUCCUUUUCUUCUGUCA 3'  
:: : .....:

query 3' ACGAGCCAGAGAAGACAGUU 5'  
query=miR156c, target=R03G\_14433, score=4, range=5263-5281, stran  
target 5' UGAUC-UUUUCUUCUGUCA 3'  
:: : .....:

query 3' ACGAGCCAGAGAAGACAGUU 5'  
query=miR6270, target=R03G\_03556, score=0, range=702-723, strand=  
target 5' AGAUGAAGAUUCCAAUAGCGAA 3'  
.....:

query 3' UCUACUUCUAAGGUUAUCGCUU 5'  
query=miR6270, target=R03G\_17281, score=0, range=138-159, strand=  
target 5' AGAUGAAGAUUCCAAUAGCGAA 3'  
.....:

query 3' UCUACUUCUAAGGUUAUCGCUU 5'  
query=miR6270, target=R03G\_16803, score=0, range=138-159, strand=  
target 5' AGAUGAAGAUUCCAAUAGCGAA 3'  
.....:

query 3' UCUACUUCUAAGGUUAUCGCUU 5'  
query=miR6270, target=R03G\_17374, score=0, range=138-159, strand=  
target 5' AGAUGAAGAUUCCAAUAGCGAA 3'  
.....:

query 3' UCUACUUCUAAGGUUAUCGCUU 5'





```

target 5' AGAUGACGAUCCGAUAGCGAA 3'
::::::::::::::::::::::::::
query 3' UCUACUUCUAAGGUAUCGCUU 5'
query=miR6270, target=R03G_17451, score=2, range=138-159, strand=
target 5' AGAUGACGAUCCGAUAGCGAA 3'
::::::::::::::::::::::::::
query 3' UCUACUUCUAAGGUAUCGCUU 5'
query=miR6270, target=R03G_04831, score=2.5, range=1559-1580, str
target 5' AGAUGAGGAUUUCAAUAGCGAC 3'
::::::::::::::::::::::::::
query 3' UCUACUUCUAAGGUAUCGCUU 5'
query=miR6270, target=R03G_04116, score=3, range=261-282, strand=
target 5' AGAAGAAGAUCCAAUAUCGAA 3'
::: :::::::::::::::::::: :::
query 3' UCUACUUCUAAGGUAUCGCUU 5'
query=miR6270, target=R03G_16714, score=4, range=255-276, strand=
target 5' AGACGAAGAUUCCAGUAUCGAA 3'
::: :::::::::::::::::::: :::
query 3' UCUACUUCUAAGGUAUCGCUU 5'
query=miR827-3p, target=R03G_06727, score=0, range=102-124, stran
target 5' CGUUUGUUGGAUGGAUCAUAUUA 3'
::::::::::::::::::::::::::
query 3' GCAAACAACCUACCUAGUAUAAU 5'
query=miR5144-5p, target=R03G_09194, score=0, range=353-371, stra
target 5' UCACUGCACAGCACAAGAA 3'
::::::::::::::::::::::::::
query 3' AGUGACGUGUCGUGUUCUU 5'
query=miR5144-5p, target=R03G_16798, score=0, range=353-371, stra
target 5' UCACUGCACAGCACAAGAA 3'
::::::::::::::::::::::::::
query 3' AGUGACGUGUCGUGUUCUU 5'
query=miR5144-5p, target=R03G_07038, score=0, range=353-371, stra
target 5' UCACUGCACAGCACAAGAA 3'
::::::::::::::::::::::::::
query 3' AGUGACGUGUCGUGUUCUU 5'
query=miR5144-5p, target=R03G_04803, score=0, range=353-371, stra
target 5' UCACUGCACAGCACAAGAA 3'
::::::::::::::::::::::::::
query 3' AGUGACGUGUCGUGUUCUU 5'
query=miR5144-5p, target=R03G_16796, score=0, range=353-371, stra
target 5' UCACUGCACAGCACAAGAA 3'
::::::::::::::::::::::::::
query 3' AGUGACGUGUCGUGUUCUU 5'
query=miR5144-5p, target=R03G_10516, score=0, range=353-371, stra
target 5' UCACUGCACAGCACAAGAA 3'

```

query 3' AGUGACGUGUCGUGUUCUU 5'  
query=miR5144-5p, target=R03G\_07040, score=0, range=353-371, strand  
target 5' UCACUGCACAGCACAAGAA 3'

query 3' AGUGACGUGUCGUGUUCUU 5'  
query=miR5144-5p, target=R03G\_07124, score=0, range=353-371, strand  
target 5' UCACUGCACAGCACAAGAA 3'

query 3' AGUGACGUGUCGUGUUCUU 5'  
query=miR5144-5p, target=R03G\_15664, score=0, range=353-371, strand  
target 5' UCACUGCACAGCACAAGAA 3'

query 3' AGUGACGUGUCGUGUUCUU 5'  
query=miR5144-5p, target=R03G\_10729, score=0, range=353-371, strand  
target 5' UCACUGCACAGCACAAGAA 3'

query 3' AGUGACGUGUCGUGUUCUU 5'  
query=miR5144-5p, target=R03G\_10743, score=0, range=353-371, strand  
target 5' UCACUGCACAGCACAAGAA 3'

query 3' AGUGACGUGUCGUGUUCUU 5'  
query=miR5144-5p, target=R03G\_09945, score=0, range=77-95, strand  
target 5' UCACUGCACAGCACAAGAA 3'

query 3' AGUGACGUGUCGUGUUCUU 5'  
query=miR5144-5p, target=R03G\_01942, score=0, range=353-371, strand  
target 5' UCACUGCACAGCACAAGAA 3'

query 3' AGUGACGUGUCGUGUUCUU 5'  
query=miR5144-5p, target=R03G\_11264, score=0, range=353-371, strand  
target 5' UCACUGCACAGCACAAGAA 3'

query 3' AGUGACGUGUCGUGUUCUU 5'  
query=miR5144-5p, target=R03G\_02956, score=0, range=353-371, strand  
target 5' UCACUGCACAGCACAAGAA 3'

query 3' AGUGACGUGUCGUGUUCUU 5'  
query=miR5144-5p, target=R03G\_05435, score=0, range=353-371, strand  
target 5' UCACUGCACAGCACAAGAA 3'

query 3' AGUGACGUGUCGUGUUCUU 5'  
query=miR5144-5p, target=R03G\_07030, score=0, range=353-371, strand  
target 5' UCACUGCACAGCACAAGAA 3'

query 3' AGUGACGUGUCGUGUUCUU 5'  
query=miR5144-5p, target=R03G\_00256, score=0, range=353-371, str  
target 5' UCACUGCACAGCACAAGAA 3'  
.....  
query 3' AGUGACGUGUCGUGUUCUU 5'  
query=miR5144-5p, target=R03G\_10780, score=0, range=353-371, str  
target 5' UCACUGCACAGCACAAGAA 3'  
.....  
query 3' AGUGACGUGUCGUGUUCUU 5'  
query=miR5144-5p, target=R03G\_12070, score=0, range=353-371, str  
target 5' UCACUGCACAGCACAAGAA 3'  
.....  
query 3' AGUGACGUGUCGUGUUCUU 5'  
query=miR5144-5p, target=R03G\_09542, score=0, range=353-371, str  
target 5' UCACUGCACAGCACAAGAA 3'  
.....  
query 3' AGUGACGUGUCGUGUUCUU 5'  
query=miR5144-5p, target=R03G\_17449, score=0, range=353-371, str  
target 5' UCACUGCACAGCACAAGAA 3'  
.....  
query 3' AGUGACGUGUCGUGUUCUU 5'  
query=miR5144-5p, target=R03G\_05939, score=0, range=353-371, str  
target 5' UCACUGCACAGCACAAGAA 3'  
.....  
query 3' AGUGACGUGUCGUGUUCUU 5'  
query=miR5144-5p, target=R03G\_14361, score=0, range=353-371, str  
target 5' UCACUGCACAGCACAAGAA 3'  
.....  
query 3' AGUGACGUGUCGUGUUCUU 5'  
query=miR5144-5p, target=R03G\_09967, score=0, range=353-371, str  
target 5' UCACUGCACAGCACAAGAA 3'  
.....  
query 3' AGUGACGUGUCGUGUUCUU 5'  
query=miR5144-5p, target=R03G\_05267, score=0, range=353-371, str  
target 5' UCACUGCACAGCACAAGAA 3'  
.....  
query 3' AGUGACGUGUCGUGUUCUU 5'  
query=miR5144-5p, target=R03G\_05264, score=0, range=353-371, str  
target 5' UCACUGCACAGCACAAGAA 3'  
.....  
query 3' AGUGACGUGUCGUGUUCUU 5'  
query=miR5144-5p, target=R03G\_04210, score=0, range=353-371, str  
target 5' UCACUGCACAGCACAAGAA 3'  
.....  
query 3' AGUGACGUGUCGUGUUCUU 5'

query=miR5144-5p, target=R03G\_16142, score=0, range=356-374, str  
target 5' UCACUGCACAGCACAAGAA 3'  
:~::~  
query 3' AGUGACGUGUCGUGUUCUU 5'  
query=miR5144-5p, target=R03G\_08660, score=0, range=353-371, str  
target 5' UCACUGCACAGCACAAGAA 3'  
:~::~  
query 3' AGUGACGUGUCGUGUUCUU 5'  
query=miR5144-5p, target=R03G\_05921, score=0, range=353-371, str  
target 5' UCACUGCACAGCACAAGAA 3'  
:~::~  
query 3' AGUGACGUGUCGUGUUCUU 5'  
query=miR5144-5p, target=R03G\_17069, score=0, range=218-236, str  
target 5' UCACUGCACAGCACAAGAA 3'  
:~::~  
query 3' AGUGACGUGUCGUGUUCUU 5'  
query=miR5144-5p, target=R03G\_04207, score=0, range=353-371, str  
target 5' UCACUGCACAGCACAAGAA 3'  
:~::~  
query 3' AGUGACGUGUCGUGUUCUU 5'  
query=miR5144-5p, target=R03G\_10773, score=0, range=353-371, str  
target 5' UCACUGCACAGCACAAGAA 3'  
:~::~  
query 3' AGUGACGUGUCGUGUUCUU 5'  
query=miR5144-5p, target=R03G\_16431, score=1, range=221-239, str  
target 5' UCACUGUACAGCACAAGAA 3'  
:~::~  
query 3' AGUGACGUGUCGUGUUCUU 5'  
query=miR5144-5p, target=R03G\_03557, score=1, range=179-197, str  
target 5' UCACUGCGCAGCACAAGAA 3'  
:~::~  
query 3' AGUGACGUGUCGUGUUCUU 5'  
query=miR5144-5p, target=R03G\_17325, score=2, range=353-371, str  
target 5' UCACUGCACAGCACAAAAA 3'  
:~::~  
query 3' AGUGACGUGUCGUGUUCUU 5'  
query=miR5144-5p, target=R03G\_11966, score=2, range=353-371, str  
target 5' UCACUGCACAGCACAAAAA 3'  
:~::~  
query 3' AGUGACGUGUCGUGUUCUU 5'  
query=miR5144-5p, target=R03G\_07860, score=2, range=353-371, str  
target 5' UCACUGCAGAGCACAAGAA 3'  
:~::~  
query 3' AGUGACGUGUCGUGUUCUU 5'  
query=miR5144-5p, target=R03G\_05953, score=2, range=353-371, str

```

target 5' UCACUGCACAGCACAAAAA 3'
:::::::::::::::::::: ::
query 3' AGUGACGUGUCGUGUUCUU 5'
query=miR5144-5p, target=R03G_05959, score=2.5, range=353-371,
strand=1
target 5' UCGCUGCACAGCACAAAAA 3'
:::::::::::::::::::: ::
query 3' AGUGACGUGUCGUGUUCUU 5'
query=miR5144-5p, target=R03G_11238, score=2.5, range=221-239,
strand=1
target 5' UCGCUGCACAGCACAAAAA 3'
:::::::::::::::::::: ::
query 3' AGUGACGUGUCGUGUUCUU 5'
query=miR5144-5p, target=R03G_05628, score=2.5, range=353-371,
strand=1
target 5' UCGCUGCACAGCACAAAAA 3'
:::::::::::::::::::: ::
query 3' AGUGACGUGUCGUGUUCUU 5'
query=miR5144-5p, target=R03G_07103, score=2.5, range=77-95, stra
target 5' UCGCUGCACAGCACAAAAA 3'
:::::::::::::::::::: ::
query 3' AGUGACGUGUCGUGUUCUU 5'
query=miR5144-5p, target=R03G_14568, score=2.5, range=353-371,
strand=1
target 5' UCGCUGCACAGCACAAAAA 3'
:::::::::::::::::::: ::
query 3' AGUGACGUGUCGUGUUCUU 5'
query=miR5144-5p, target=R03G_16689, score=2.5, range=353-371,
strand=1
target 5' UCGCUGCACAGCACAAAAA 3'
:::::::::::::::::::: ::
query 3' AGUGACGUGUCGUGUUCUU 5'
query=miR5144-5p, target=R03G_17308, score=2.5, range=353-371,
strand=1
target 5' UCGCUGCACAGCACAAAAA 3'
:::::::::::::::::::: ::
query 3' AGUGACGUGUCGUGUUCUU 5'
query=miR5144-5p, target=R03G_10798, score=2.5, range=353-371,
strand=1
target 5' UCGCUGCACAGCACAAAAA 3'
:::::::::::::::::::: ::
query 3' AGUGACGUGUCGUGUUCUU 5'
query=miR5144-5p, target=R03G_03037, score=2.5, range=1836-1853,
strand=-1
target 5' UC-CUUCACAGCACAAGAG 3'

```

```
:: :: ::::::::::::::.
query 3' AGUGACGUGUCGUGUUCUU 5'
query=miR5144-5p, target=R03G_17083, score=3, range=1703-1721,
strand=1
target 5' UUGCUGAACAGCACAAGAA 3'
:.....: ::::::::::::::.
query 3' AGUGACGUGUCGUGUUCUU 5'
query=miR5144-5p, target=R03G_07214, score=3, range=62-81, strand
target 5' UCACUUGCACAGCACGAGAU 3'
::::: ::::::::::::::.
query 3' AGUG-ACGUGUCGUGUUCUU 5'
query=miR5144-5p, target=R03G_08312, score=3, range=216-234, stra
target 5' UCAGUGGACAGCACAAGAA 3'
::: :: ::::::::::::::.
query 3' AGUGACGUGUCGUGUUCUU 5'
query=miR5144-5p, target=R03G_06678, score=3, range=843-860, stra
target 5' UC-CUGCUCAGCACAAGAA 3'
:: :::::: ::::::::::::::.
query 3' AGUGACGUGUCGUGUUCUU 5'
query=miR5144-5p, target=R03G_05120, score=4, range=289-306, stra
target 5' UCACUGCACAGCGC-GGAA 3'
::::::::::::. : :::::
query 3' AGUGACGUGUCGUGUUCUU 5'
query=miR5144-5p, target=R03G_14679, score=4, range=702-720, stra
target 5' UUAUUUAUACAGCACAAGAU 3'
:.....: .::::::::::::.
query 3' AGUGACGUGUCGUGUUCUU 5'
query=miR5144-5p, target=R03G_04155, score=4, range=161-180, stra
target 5' UGGCUGUACAGCACGAAGAA 3'
: .::::.::::. : :::::
query 3' AGUGACGUGUCGUG-UUCUU 5'
query=miR5144-5p, target=R03G_00637, score=4, range=3-20, strand=
target 5' GUGC-GCACAGCACAAGGA 3'
... :::::::::::::.
query 3' AGUGACGUGUCGUGUUCUU 5'
query=miR5144-5p, target=R03G_08491, score=4, range=760-777, stra
target 5' ACAC-CCACAGUACAAGAA 3'
::: :.....:
query 3' AGUGACGUGUCGUGUUCUU 5'
query=miR5144-5p, target=R03G_06174, score=4, range=2914-2931,
strand=1
target 5' UCACUGCACA-CACAAGGC 3'
::::::::::::: : :::::.
query 3' AGUGACGUGUCGUGUUCUU 5'
query=miR5144-5p, target=R03G_07934, score=4, range=325-342, stra
```

target 5' UUAUUUCA-AGCACAAGAA 3'  
:..: :: :.....:  
query 3' AGUGACGUGUCGUGUUCUU 5'  
query=miR5144-5p, target=R03G\_17255, score=4, range=1093-1110,  
strand=-1  
target 5' CCACUG-ACAGCACAAGGA 3'  
:.... :.....:  
query 3' AGUGACGUGUCGUGUUCUU 5'  
query=miR5144-5p, target=R03G\_11979, score=4, range=1096-1113,  
strand=-1  
target 5' CCACUG-ACAGCACAAGGA 3'  
:.... :.....:  
query 3' AGUGACGUGUCGUGUUCUU 5'  
query=miR5144-5p, target=R03G\_10532, score=4, range=1108-1125,  
strand=-1  
target 5' CCACUG-ACAGCACAAGGA 3'  
:.... :.....:  
query 3' AGUGACGUGUCGUGUUCUU 5'  
query=miR6202, target=R03G\_08114, score=0, range=16-35, strand=1  
target 5' CUUCAAGCUUAAAUCCUCA 3'  
:.....:  
query 3' GAAGUUUCGAAUUUAGGAGU 5'  
query=miR6202, target=R03G\_00653, score=0, range=3964-3983, stran  
target 5' CUUCAAGCUUAAAUCCUCA 3'  
:.....:  
query 3' GAAGUUUCGAAUUUAGGAGU 5'  
query=miR6202, target=R03G\_12753, score=0, range=16-35, strand=1  
target 5' CUUCAAGCUUAAAUCCUCA 3'  
:.....:  
query 3' GAAGUUUCGAAUUUAGGAGU 5'  
query=miR6202, target=R03G\_04256, score=0, range=16-35, strand=1  
target 5' CUUCAAGCUUAAAUCCUCA 3'  
:.....:  
query 3' GAAGUUUCGAAUUUAGGAGU 5'  
query=miR6202, target=R03G\_14345, score=0, range=16-35, strand=1  
target 5' CUUCAAGCUUAAAUCCUCA 3'  
:.....:  
query 3' GAAGUUUCGAAUUUAGGAGU 5'  
query=miR6202, target=R03G\_08062, score=0, range=835-854, strand=  
target 5' CUUCAAGCUUAAAUCCUCA 3'  
:.....:  
query 3' GAAGUUUCGAAUUUAGGAGU 5'  
query=miR6202, target=R03G\_01243, score=0, range=16-35, strand=1  
target 5' CUUCAAGCUUAAAUCCUCA 3'  
:.....:

query 3' GAAGUUUCGAAUUUAGGAGU 5'  
query=miR6202, target=R03G\_06977, score=0, range=619-638, strand=  
target 5' CUUCAAGCUUAAAUCCUCA 3'  
.....  
query 3' GAAGUUUCGAAUUUAGGAGU 5'  
query=miR6202, target=R03G\_16319, score=0, range=4054-4073, stran  
target 5' CUUCAAGCUUAAAUCCUCA 3'  
.....  
query 3' GAAGUUUCGAAUUUAGGAGU 5'  
query=miR6202, target=R03G\_12207, score=0, range=4054-4073, stran  
target 5' CUUCAAGCUUAAAUCCUCA 3'  
.....  
query 3' GAAGUUUCGAAUUUAGGAGU 5'  
query=miR6202, target=R03G\_01242, score=0, range=16-35, strand=1  
target 5' CUUCAAGCUUAAAUCCUCA 3'  
.....  
query 3' GAAGUUUCGAAUUUAGGAGU 5'  
query=miR6202, target=R03G\_02944, score=0, range=3373-3392, stran  
target 5' CUUCAAGCUUAAAUCCUCA 3'  
.....  
query 3' GAAGUUUCGAAUUUAGGAGU 5'  
query=miR6202, target=R03G\_01026, score=0, range=16-35, strand=1  
target 5' CUUCAAGCUUAAAUCCUCA 3'  
.....  
query 3' GAAGUUUCGAAUUUAGGAGU 5'  
query=miR6202, target=R03G\_09206, score=2, range=16-35, strand=1  
target 5' CUUCAACCUUAAAUCCUCA 3'  
.....  
query 3' GAAGUUUCGAAUUUAGGAGU 5'  
query=miR6202, target=R03G\_00493, score=2.5, range=358-377, stran  
target 5' CUUCAAGCUUAAAUCCUAG 3'  
.....  
query 3' GAAGUUUCGAAUUUAGGAGU 5'  
query=miR6202, target=R03G\_05992, score=3, range=806-825, strand=  
target 5' CAUCUCAGCUUAAAUCCUCA 3'  
: : .....

query 3' GAAGUUUCGAAUUUAGGAGU 5'  
query=miR6202, target=R03G\_11606, score=3, range=1047-1066, stran  
target 5' UUUCCAAGCUUAAAUCUUCG 3'  
.... ..

query 3' GAAGUUUCGAAUUUAGGAGU 5'  
query=miR6202, target=R03G\_10954, score=4, range=16-35, strand=1  
target 5' CUUCAAGUUUAAGUCCUGA 3'  
..... :  
query 3' GAAGUUUCGAAUUUAGGAGU 5'



query=miR6202, target=R03G\_15536, score=4, range=3628-3647, stran  
target 5' GCUAAAAGCUUGAAUCCUCA 3'  
: :::::::::::::::::::::  
query 3' GAAGUUUCGAAUUUAGGAGU 5'  
query=miR6202, target=R03G\_01906, score=4, range=882-900, strand=  
target 5' CUUC-AAGCUAAA AUCCUCU 3'  
:::: ::::: :::::::::::  
query 3' GAAGUUUCGAAUUUAGGAGU 5'  
query=miR6202, target=R03G\_09575, score=4, range=957-976, strand=  
target 5' CAUCAACGCUUAGAUCUUCA 3'  
: ::::: :::::::::::::::::::::  
query 3' GAAGUUUCGAAUUUAGGAGU 5'  
query=miR9657a-3p, target=R03G\_05616, score=0, range=69-90, stran  
target 5' ACCUGUACGACAGGAAGCACCA 3'  
:::::::::::::::::::::::::::  
query 3' UGGACAUGCUGUCCUUCGUGGU 5'  
query=miR9657a-3p, target=R03G\_06070, score=0.5, range=91-112,  
strand=1  
target 5' ACCUGUAUGACAGGAAGCACCA 3'  
:::::::::::::::::::::::::::  
query 3' UGGACAUGCUGUCCUUCGUGGU 5'  
query=miR9657a-3p, target=R03G\_01923, score=0.5, range=728-749,  
strand=-1  
target 5' ACCUGUAUGACAGGAAGCACCA 3'  
:::::::::::::::::::::::::::  
query 3' UGGACAUGCUGUCCUUCGUGGU 5'  
query=miR9657a-3p, target=R03G\_02936, score=0.5, range=777-798,  
strand=-1  
target 5' ACCUGUAUGACAGGAAGCACCA 3'  
:::::::::::::::::::::::::::  
query 3' UGGACAUGCUGUCCUUCGUGGU 5'  
query=miR9657a-3p, target=R03G\_11486, score=0.5, range=489-510,  
strand=-1  
target 5' ACCUGUAUGACAGGAAGCACCA 3'  
:::::::::::::::::::::::::::  
query 3' UGGACAUGCUGUCCUUCGUGGU 5'  
query=miR9657a-3p, target=R03G\_05133, score=0.5, range=543-564,  
strand=-1  
target 5' ACCUGUAUGACAGGAAGCACCA 3'  
:::::::::::::::::::::::::::  
query 3' UGGACAUGCUGUCCUUCGUGGU 5'  
query=miR9657a-3p, target=R03G\_01528, score=0.5, range=348-369,  
strand=-1  
target 5' ACCUGUAUGACAGGAAGCACCA 3'  
:::::::::::::::::::::::::::

query 3' UGGACAUGCUGUCCUUCGUGGU 5'  
query=miR9657a-3p, target=R03G\_08649, score=0.5, range=485-506,  
strand=-1  
target 5' ACCUGUAUGACAGGAAGCACCA 3'  
::::::::::::::::::::::::::

query 3' UGGACAUGCUGUCCUUCGUGGU 5'  
query=miR9657a-3p, target=R03G\_15496, score=0.5, range=423-444,  
strand=-1  
target 5' ACCUGUAUGACAGGAAGCACCA 3'  
::::::::::::::::::::::::::

query 3' UGGACAUGCUGUCCUUCGUGGU 5'  
query=miR9657a-3p, target=R03G\_10644, score=0.5, range=165-186,  
strand=-1  
target 5' ACCUGUAUGACAGGAAGCACCA 3'  
::::::::::::::::::::::::::

query 3' UGGACAUGCUGUCCUUCGUGGU 5'  
query=miR9657a-3p, target=R03G\_05535, score=0.5, range=165-186,  
strand=-1  
target 5' ACCUGUAUGACAGGAAGCACCA 3'  
::::::::::::::::::::::::::

query 3' UGGACAUGCUGUCCUUCGUGGU 5'  
query=miR9657a-3p, target=R03G\_12139, score=0.5, range=153-174,  
strand=-1  
target 5' ACCUGUAUGACAGGAAGCACCA 3'  
::::::::::::::::::::::::::

query 3' UGGACAUGCUGUCCUUCGUGGU 5'  
query=miR9657a-3p, target=R03G\_01518, score=0.5, range=153-174,  
strand=-1  
target 5' ACCUGUAUGACAGGAAGCACCA 3'  
::::::::::::::::::::::::::

query 3' UGGACAUGCUGUCCUUCGUGGU 5'  
query=miR9657a-3p, target=R03G\_01013, score=0.5, range=222-243,  
strand=-1  
target 5' ACCUGUAUGACAGGAAGCACCA 3'  
::::::::::::::::::::::::::

query 3' UGGACAUGCUGUCCUUCGUGGU 5'  
query=miR9657a-3p, target=R03G\_16893, score=0.5, range=165-186,  
strand=-1  
target 5' ACCUGUAUGACAGGAAGCACCA 3'  
::::::::::::::::::::::::::

query 3' UGGACAUGCUGUCCUUCGUGGU 5'  
query=miR9657a-3p, target=R03G\_04866, score=0.5, range=165-186,  
strand=-1  
target 5' ACCUGUAUGACAGGAAGCACCA 3'  
::::::::::::::::::::::::::



query 3' UGGACAUGCUGUCCUUCGUGGU 5'  
query=miR9657a-3p, target=R03G\_13664, score=1.5, range=780-801,  
strand=-1  
target 5' ACCAGUAUGACAGGAAGCACCA 3'  
::: ::::::::::::::::::::

query 3' UGGACAUGCUGUCCUUCGUGGU 5'  
query=miR9657a-3p, target=R03G\_14722, score=1.5, range=780-801,  
strand=-1  
target 5' ACCAGUAUGACAGGAAGCACCA 3'  
::: ::::::::::::::::::::

query 3' UGGACAUGCUGUCCUUCGUGGU 5'  
query=miR9657a-3p, target=R03G\_05303, score=1.5, range=780-801,  
strand=-1  
target 5' ACCAGUAUGACAGGAAGCACCA 3'  
::: ::::::::::::::::::::

query 3' UGGACAUGCUGUCCUUCGUGGU 5'  
query=miR9657a-3p, target=R03G\_02354, score=1.5, range=780-801,  
strand=-1  
target 5' ACCAGUAUGACAGGAAGCACCA 3'  
::: ::::::::::::::::::::

query 3' UGGACAUGCUGUCCUUCGUGGU 5'  
query=miR9657a-3p, target=R03G\_08906, score=1.5, range=780-801,  
strand=-1  
target 5' ACCAGUAUGACAGGAAGCACCA 3'  
::: ::::::::::::::::::::

query 3' UGGACAUGCUGUCCUUCGUGGU 5'  
query=miR9657a-3p, target=R03G\_05194, score=1.5, range=780-801,  
strand=-1  
target 5' ACCAGUAUGACAGGAAGCACCA 3'  
::: ::::::::::::::::::::

query 3' UGGACAUGCUGUCCUUCGUGGU 5'  
query=miR9657a-3p, target=R03G\_05181, score=1.5, range=780-801,  
strand=-1  
target 5' ACCAGUAUGACAGGAAGCACCA 3'  
::: ::::::::::::::::::::

query 3' UGGACAUGCUGUCCUUCGUGGU 5'  
query=miR9657a-3p, target=R03G\_10707, score=2, range=267-288,  
strand=-1  
target 5' AUCUGUAUGACAGGAAGCGCCA 3'  
:.....:.....:.....

query 3' UGGACAUGCUGUCCUUCGUGGU 5'  
query=miR9657a-3p, target=R03G\_00780, score=2, range=334-355,  
strand=-1  
target 5' ACCUGUACGACAGGAAGCUCCA 3'  
:.....:.....:.....

query 3' UGGACAUGCUGUCCUUCGUGGU 5'  
query=miR9657a-3p, target=R03G\_04104, score=2, range=477-498,  
strand=-1  
target 5' ACCUAUGUGACAGGAAGCACCA 3'  
:::: :.....  
query 3' UGGACAUGCUGUCCUUCGUGGU 5'  
query=miR9657a-3p, target=R03G\_04110, score=2, range=477-498,  
strand=-1  
target 5' ACCUAUGUGACAGGAAGCACCA 3'  
:::: :.....  
query 3' UGGACAUGCUGUCCUUCGUGGU 5'  
query=miR9657a-3p, target=R03G\_15836, score=2.5, range=91-112,  
strand=1  
target 5' ACCUGUAUGACAGGAAGCUCCA 3'  
:.....: ::::  
query 3' UGGACAUGCUGUCCUUCGUGGU 5'  
query=miR9657a-3p, target=R03G\_01545, score=2.5, range=576-597,  
strand=-1  
target 5' ACCUGUAUGACAGGAAGCUCCA 3'  
:.....: ::::  
query 3' UGGACAUGCUGUCCUUCGUGGU 5'  
query=miR9657a-3p, target=R03G\_14365, score=2.5, range=522-543,  
strand=-1  
target 5' ACCUGUAUGACAGGAAGCUCCA 3'  
:.....: ::::  
query 3' UGGACAUGCUGUCCUUCGUGGU 5'  
query=miR9657a-3p, target=R03G\_14123, score=2.5, range=264-285,  
strand=-1  
target 5' ACCUGUAUGACAGGAAGCUCCA 3'  
:.....: ::::  
query 3' UGGACAUGCUGUCCUUCGUGGU 5'  
query=miR9657a-3p, target=R03G\_04776, score=2.5, range=726-746,  
strand=-1  
target 5' AUCUGUACG-CAGGAAGCACCA 3'  
:.....: :.....  
query 3' UGGACAUGCUGUCCUUCGUGGU 5'  
query=miR9657a-3p, target=R03G\_11757, score=3.5, range=165-186,  
strand=-1  
target 5' ACCUGUAUGGCAGGAAGCUCCA 3'  
:.....: ::::  
query 3' UGGACAUGCUGUCCUUCGUGGU 5'  
query=miR9657a-3p, target=R03G\_11765, score=3.5, range=165-186,  
strand=-1  
target 5' ACCUGUAUGGCAGGAAGCUCCA 3'  
:.....: ::::

query 3' UGGACAUGCUGUCCUUCGUGGU 5'  
query=miR9657a-3p, target=R03G\_06838, score=3.5, range=264-285,  
strand=-1  
target 5' ACCUGUAUGACAGGAAGCUCUA 3'  
:~::~  
query 3' UGGACAUGCUGUCCUUCGUGGU 5'  
query=miR9657a-3p, target=R03G\_15336, score=3.5, range=267-287,  
strand=-1  
target 5' ACCUGUAUGACAGGAAGC-UCA 3'  
:~::~  
query 3' UGGACAUGCUGUCCUUCGUGGU 5'  
query=miR9657a-3p, target=R03G\_08684, score=3.5, range=198-219,  
strand=-1  
target 5' ACCUAUAUGACAGGAAGCUCCA 3'  
:~::~  
query 3' UGGACAUGCUGUCCUUCGUGGU 5'  
query=miR9657a-3p, target=R03G\_09656, score=3.5, range=306-327,  
strand=-1  
target 5' ACCUGUAUAACAGGAAGCUCCA 3'  
:~::~  
query 3' UGGACAUGCUGUCCUUCGUGGU 5'  
query=miR9657a-3p, target=R03G\_13827, score=4, range=1203-1223,  
strand=1  
target 5' ACCUGU-CGACAGGAUGCAUCA 3'  
:~::~  
query 3' UGGACAUGCUGUCCUUCGUGGU 5'  
query=miR9657a-3p, target=R03G\_09838, score=4, range=552-573,  
strand=-1  
target 5' CUCUGUAUGACAGGAAGCUCCA 3'  
.~::~  
query 3' UGGACAUGCUGUCCUUCGUGGU 5'  
query=miR6462e, target=R03G\_06442, score=0, range=4812-4831, stra  
target 5' AGUAGACAAAAAGGCAAAAA 3'  
:~::~  
query 3' UCAUCUGUUUUUCCGUUUUU 5'  
query=miR6462e, target=R03G\_02691, score=0, range=7644-7663, stra  
target 5' AGUAGACAAAAAGGCAAAAA 3'  
:~::~  
query 3' UCAUCUGUUUUUCCGUUUUU 5'  
query=miR6462e, target=R03G\_09965, score=0, range=4155-4174, stra  
target 5' AGUAGACAAAAAGGCAAAAA 3'  
:~::~  
query 3' UCAUCUGUUUUUCCGUUUUU 5'  
query=miR6462e, target=R03G\_13920, score=0, range=4155-4174, stra  
target 5' AGUAGACAAAAAGGCAAAAA 3'

query 3' UCAUCUGUUUUUCCGUUUUU 5'  
query=miR6462e, target=R03G\_03547, score=0, range=4155-4174, str  
target 5' AGUAGACAAAAAGGCAAAAA 3'

query 3' UCAUCUGUUUUUCCGUUUUU 5'  
query=miR6462e, target=R03G\_13867, score=0, range=4071-4090, str  
target 5' AGUAGACAAAAAGGCAAAAA 3'

query 3' UCAUCUGUUUUUCCGUUUUU 5'  
query=miR6462e, target=R03G\_02959, score=0, range=4155-4174, str  
target 5' AGUAGACAAAAAGGCAAAAA 3'

query 3' UCAUCUGUUUUUCCGUUUUU 5'  
query=miR6462e, target=R03G\_15250, score=0, range=4110-4129, str  
target 5' AGUAGACAAAAAGGCAAAAA 3'

query 3' UCAUCUGUUUUUCCGUUUUU 5'  
query=miR6462e, target=R03G\_17371, score=0, range=4110-4129, str  
target 5' AGUAGACAAAAAGGCAAAAA 3'

query 3' UCAUCUGUUUUUCCGUUUUU 5'  
query=miR6462e, target=R03G\_06427, score=0, range=3747-3766, str  
target 5' AGUAGACAAAAAGGCAAAAA 3'

query 3' UCAUCUGUUUUUCCGUUUUU 5'  
query=miR6462e, target=R03G\_02222, score=0, range=1209-1228, str  
target 5' AGUAGACAAAAAGGCAAAAA 3'

query 3' UCAUCUGUUUUUCCGUUUUU 5'  
query=miR6462e, target=R03G\_10558, score=0, range=1908-1927, str  
target 5' AGUAGACAAAAAGGCAAAAA 3'

query 3' UCAUCUGUUUUUCCGUUUUU 5'  
query=miR6462e, target=R03G\_04115, score=0, range=1098-1117, str  
target 5' AGUAGACAAAAAGGCAAAAA 3'

query 3' UCAUCUGUUUUUCCGUUUUU 5'  
query=miR6462e, target=R03G\_11776, score=0, range=1245-1264, str  
target 5' AGUAGACAAAAAGGCAAAAA 3'

query 3' UCAUCUGUUUUUCCGUUUUU 5'  
query=miR6462e, target=R03G\_14355, score=0, range=2361-2380, str  
target 5' AGUAGACAAAAAGGCAAAAA 3'

```

query 3' UCAUCUGUUUUUCCGUUUUU 5'
query=miR6462e, target=R03G_17404, score=0, range=783-802, strand
target 5' AGUAGACAAAAAGGCAAAAA 3'
: : : : : : : : : : : :
query 3' UCAUCUGUUUUUCCGUUUUU 5'
query=miR6462e, target=R03G_13749, score=0, range=2664-2683, str
target 5' AGUAGACAAAAAGGCAAAAA 3'
: : : : : : : : : : : :
query 3' UCAUCUGUUUUUCCGUUUUU 5'
query=miR6462e, target=R03G_01330, score=0, range=1389-1408, stra
target 5' AGUAGACAAAAAGGCAAAAA 3'
: : : : : : : : : : : :
query 3' UCAUCUGUUUUUCCGUUUUU 5'
query=miR6462e, target=R03G_06428, score=0, range=3249-3268, stra
target 5' AGUAGACAAAAAGGCAAAAA 3'
: : : : : : : : : : : :
query 3' UCAUCUGUUUUUCCGUUUUU 5'
query=miR6462e, target=R03G_01613, score=0, range=2352-2371, stra
target 5' AGUAGACAAAAAGGCAAAAA 3'
: : : : : : : : : : ~:
query 3' UCAUCUGUUUUUCCGUUUUU 5'
query=miR6462e, target=R03G_05619, score=0, range=2298-2317, stra
target 5' AGUAGACAAAAAGGCAAAAA 3'
: : : : : : : : : ~:
query 3' UCAUCUGUUUUUCCGUUUUU 5'
query=miR6462e, target=R03G_17326, score=1, range=3987-4006, stra
target 5' AGUACACAAAAAGGCAAAAA 3'
: : : : : : : : : ~:
query 3' UCAUCUGUUUUUCCGUUUUU 5'
query=miR6462e, target=R03G_16015, score=1.5, range=2154-2172,
strand=-1
target 5' AGU-GGCAAAAAGGCAAAAA 3'
: : : : : : : : : ~:
query 3' UCAUCUGUUUUUCCGUUUUU 5'
query=miR6462e, target=R03G_12588, score=3, range=861-880, strand
target 5' AGCAGACAAAAAGGCAAAGC 3'
: : : : : : : : : ~:
query 3' UCAUCUGUUUUUCCGUUUUU 5'
query=miR6462e, target=R03G_14112, score=3, range=246-265, strand
target 5' AUUAGAGAAAAAGGCAAAGA 3'
: : : : : : : : : ~:
query 3' UCAUCUGUUUUUCCGUUUUU 5'
query=miR6462e, target=R03G_01140, score=3, range=228-247, strand
target 5' AGAAGAAAAAAGGCGAAAA 3'
: : : : : : : : : ~:

```



query 3' UCAUCUGUUUUUCCGUUUUU 5'  
query=miR6462e, target=R03G\_16912, score=3, range=634-652, strand  
target 5' AUUA-AAAAAAGGCAAAA 3'  
: :: : ::::: :::::  
query 3' UCAUCUGUUUUUCCGUUUUU 5'  
query=miR6462e, target=R03G\_13564, score=3.5, range=158-177, stra  
target 5' AGUUGACAGAGAGGCAAAAG 3'  
::: ::::: :::::  
query 3' UCAUCUGUUUUUCCGUUUUU 5'  
query=miR6462e, target=R03G\_15072, score=3.5, range=228-247, stra  
target 5' AGUUGUAAAAAGGCAGAAA 3'  
::: : .::: :::::  
query 3' UCAUCUGUUUUUCCGUUUUU 5'  
query=miR6462e, target=R03G\_15307, score=3.5, range=1110-1128,  
strand=1  
target 5' AG-AGAUAAAAAGGCAAAGU 3'  
:: ::::: :::::  
query 3' UCAUCUGUUUUUCCGUUUUU 5'  
query=miR6462e, target=R03G\_02652, score=3.5, range=48-66, strand  
target 5' AGCAGAUAAAAA-GCAAAA 3'  
:: ::::: :::::  
query 3' UCAUCUGUUUUUCCGUUUUU 5'  
query=miR6462e, target=R03G\_02732, score=3.5, range=295-313, stra  
target 5' AGUA-UUAAAAAGGCAAAGA 3'  
:::: .::: :::::  
query 3' UCAUCUGUUUUUCCGUUUUU 5'  
query=miR6462e, target=R03G\_03214, score=3.5, range=229-247, stra  
target 5' AGUCUG-AAAAAGGCAAAA 3'  
::: . ::::: :::::  
query 3' UCAUCUGUUUUUCCGUUUUU 5'  
query=miR6462e, target=R03G\_12330, score=4, range=573-592, strand  
target 5' AGCAGACAAGAAGGCGAGAA 3'  
:: ::::: :::::  
query 3' UCAUCUGUUUUUCCGUUUUU 5'  
query=miR6462e, target=R03G\_12274, score=4, range=375-394, strand  
target 5' AGUAGAUAAAAAGGCAGUAG 3'  
::: ::::: ::::: .  
query 3' UCAUCUGUUUUUCCGUUUUU 5'  
query=miR6462e, target=R03G\_06590, score=4, range=3001-3020, stra  
target 5' AGUGCACAAAAAGGUGAAAG 3'  
::: . ::::: :::::  
query 3' UCAUCUGUUUUUCCGUUUUU 5'  
query=miR6462e, target=R03G\_01430, score=4, range=6-25, strand=1  
target 5' AGUAGAAAAGAAGGCAAAGU 3'  
::: ::::: :::::



query=miR6462e, target=R03G\_10924, score=4, range=536-554, strand  
target 5' AGAAGACGAAAA-GCAAAAA 3'  
:: ::::::::::: :::::::::::  
query 3' UCAUCUGUUUUUCCGUUUUU 5'  
query=miR6462e, target=R03G\_15382, score=4, range=2437-2455, strand  
target 5' AG-AGAAAAGAAGGCAAAGA 3'  
:: :: ::::::::::: :::::::::::  
query 3' UCAUCUGUUUUUCCGUUUUU 5'  
query=miR6462e, target=R03G\_10256, score=4, range=569-587, strand  
target 5' AGAAGA-AGAAAGGCAAGAA 3'  
:: :: ::::::::::: :::::::::::  
query 3' UCAUCUGUUUUUCCGUUUUU 5'  
query=miR6462e, target=R03G\_09886, score=4, range=276-295, strand  
target 5' AAUUGACAAAAAGUCAAAAA 3'  
: : ::::::::::: :::::::::::  
query 3' UCAUCUGUUUUUCCGUUUUU 5'  
query=miR6462e, target=R03G\_07436, score=4, range=1944-1963, strand  
target 5' AGAAACCAAAAAGGCGAAAA 3'  
:: : ::::::::::: :::::::::::  
query 3' UCAUCUGUUUUUCCGUUUUU 5'  
query=miR6462e, target=R03G\_05744, score=4, range=864-883, strand  
target 5' AGUUGAAAAAAAGCCAAAAA 3'  
::: : ::::::::::: :::::::::::  
query 3' UCAUCUGUUUUUCCGUUUUU 5'  
query=miR6462e, target=R03G\_00717, score=4, range=198-217, strand  
target 5' AGAAGAAAAAAAGGCCAAAA 3'  
:: :: ::::::::::: :::::::::::  
query 3' UCAUCUGUUUUUCCGUUUUU 5'  
query=miR6462e, target=R03G\_10919, score=4, range=1349-1369, strand  
target 5' AGUUUAUCAAGAAGGCAAAAA 3'  
::: : ::::::::::: :::::::::::  
query 3' UCAUCU-GUUUUUCCGUUUUU 5'  
query=miR6462e, target=R03G\_14082, score=4, range=700-718, strand  
target 5' CCUACA-AAAAAGGCAAAAA 3'  
:: : ::::::::::: :::::::::::  
query 3' UCAUCUGUUUUUCCGUUUUU 5'  
query=miR6462e, target=R03G\_03022, score=4, range=251-271, strand  
target 5' AGUAAGACAAAAGGGUAAAGA 3'  
::: ::::::::::: :::::::::::  
query 3' UCA-UCUGUUUUUCCGUUUUU 5'  
query=miR6462e, target=R03G\_03656, score=4, range=661-681, strand  
target 5' AGUAGAUGAAGAAGGCAAAGG 3'  
::: ::::::::::: :::::::::::  
query 3' UCAUCUG-UUUUUUCCGUUUUU 5'  
query=miR6462e, target=R03G\_09847, score=4, range=2651-2669, strand

target 5' GGU-GGCAAAAAGGUGAAAA 3'  
... :.....  
query 3' UCAUCUGUUUUUCCGUUUUU 5'  
query=miR6462e, target=R03G\_03960, score=4, range=59-77, strand=-  
target 5' AAUA-AAAAAGAGGCAAAAA 3'  
: : : :.....  
query 3' UCAUCUGUUUUUCCGUUUUU 5'  
query=miR5711, target=R03G\_12115, score=4, range=4425-4444, stran  
target 5' UCGUAAAAACCCAGAGAACG 3'  
. :..... :.....  
query 3' GCCAUUUUUUGGGUGUCUUGU 5'  
query=miR5711, target=R03G\_12097, score=4, range=1828-1846, stran  
target 5' UGG-GACGACCCACAGAACA 3'  
... : : :.....  
query 3' GCCAUUUUUUGGGUGUCUUGU 5'  
query=miR5711, target=R03G\_08264, score=4, range=620-639, strand=  
target 5' GGGCAAAAUCCACAGAGCA 3'  
: : :.....  
query 3' GCCAUUUUUUGGGUGUCUUGU 5'  
query=miR7803b-3p, target=R03G\_15271, score=1, range=411-433, str  
target 5' AGUACAUGAUUGGCGACGUGUCA 3'  
:.....  
query 3' UCAUGUACUAACUGCUGCACAGU 5'  
query=miR7803b-3p, target=R03G\_07705, score=1, range=411-433, str  
target 5' AGUACAUGAUUGGCGACGUGUCA 3'  
:.....  
query 3' UCAUGUACUAACUGCUGCACAGU 5'  
query=miR7803b-3p, target=R03G\_01328, score=1, range=411-433, str  
target 5' AGUACAUGAUUGGCGACGUGUCA 3'  
:.....  
query 3' UCAUGUACUAACUGCUGCACAGU 5'  
query=miR7803b-3p, target=R03G\_17387, score=1, range=411-433, str  
target 5' AGUACAUGAUUGGCGACGUGUCA 3'  
:.....  
query 3' UCAUGUACUAACUGCUGCACAGU 5'  
query=miR7803b-3p, target=R03G\_16123, score=1, range=411-433, str  
target 5' AGUACAUGAUUGGCGACGUGUCA 3'  
:.....  
query 3' UCAUGUACUAACUGCUGCACAGU 5'  
query=miR7803b-3p, target=R03G\_17399, score=1, range=411-433, str  
target 5' AGUACAUGAUUGGCGACGUGUCA 3'  
:.....  
query 3' UCAUGUACUAACUGCUGCACAGU 5'  
query=miR7803b-3p, target=R03G\_06717, score=1, range=411-433, str  
target 5' AGUACAUGAUUGGCGACGUGUCA 3'

query 3' UCAUGUACUAACUGCUGCACAGU 5'  
query=miR7803b-3p, target=R03G\_07137, score=1, range=411-433, str  
target 5' AGUACAUGAUUGGCGACGUGUCA 3'

query 3' UCAUGUACUAACUGCUGCACAGU 5'  
query=miR7803b-3p, target=R03G\_05268, score=1, range=411-433, str  
target 5' AGUACAUGAUUGGCGACGUGUCA 3'

query 3' UCAUGUACUAACUGCUGCACAGU 5'  
query=miR7803b-3p, target=R03G\_04674, score=1, range=162-184, str  
target 5' AGUACAUGAUUGGCGACGUGUCA 3'

query 3' UCAUGUACUAACUGCUGCACAGU 5'  
query=miR7803b-3p, target=R03G\_17223, score=1, range=135-157, str  
target 5' AGUACAUGAUUGGCGACGUGUCA 3'

query 3' UCAUGUACUAACUGCUGCACAGU 5'  
query=miR7803b-3p, target=R03G\_07702, score=1, range=162-184, str  
target 5' AGUACAUGAUUGGCGACGUGUCA 3'

query 3' UCAUGUACUAACUGCUGCACAGU 5'  
query=miR7803b-3p, target=R03G\_16420, score=1, range=162-184, str  
target 5' AGUACAUGAUUGGCGACGUGUCA 3'

query 3' UCAUGUACUAACUGCUGCACAGU 5'  
query=miR7803b-3p, target=R03G\_15282, score=1, range=135-157, str  
target 5' AGUACAUGAUUGGCGACGUGUCA 3'

query 3' UCAUGUACUAACUGCUGCACAGU 5'  
query=miR7803b-3p, target=R03G\_10795, score=1, range=411-433, str  
target 5' AGUACAUGAUUGGCGACGUGUCA 3'

query 3' UCAUGUACUAACUGCUGCACAGU 5'  
query=miR7803b-3p, target=R03G\_15261, score=1, range=411-433, str  
target 5' AGUACAUGAUUGGCGACGUGUCA 3'

query 3' UCAUGUACUAACUGCUGCACAGU 5'  
query=miR7803b-3p, target=R03G\_17017, score=1, range=411-433, str  
target 5' AGUACAUGAUUGGCGACGUGUCA 3'

query 3' UCAUGUACUAACUGCUGCACAGU 5'  
query=miR7803b-3p, target=R03G\_04695, score=1, range=201-223, str  
target 5' AGUACAUGAUUGGCGACGUGUCA 3'

query 3' UCAUGUACUAACUGCUGCACAGU 5'  
query=miR7803b-3p, target=R03G\_07867, score=1, range=162-184, str  
target 5' AGUACAUGAUUGGCGACGUGUCA 3'  
.....  
query 3' UCAUGUACUAACUGCUGCACAGU 5'  
query=miR7803b-3p, target=R03G\_16725, score=1, range=153-175, str  
target 5' AGUACAUGAUUGGCGACGUGUCA 3'  
.....  
query 3' UCAUGUACUAACUGCUGCACAGU 5'  
query=miR7803b-3p, target=R03G\_13852, score=1, range=162-184, str  
target 5' AGUACAUGAUUGGCGACGUGUCA 3'  
.....  
query 3' UCAUGUACUAACUGCUGCACAGU 5'  
query=miR7803b-3p, target=R03G\_16383, score=1, range=411-433, str  
target 5' AGUACAUGAUUGGCGACGUGUCA 3'  
.....  
query 3' UCAUGUACUAACUGCUGCACAGU 5'  
query=miR7803b-3p, target=R03G\_06735, score=1, range=135-157, str  
target 5' AGUACAUGAUUGGCGACGUGUCA 3'  
.....  
query 3' UCAUGUACUAACUGCUGCACAGU 5'  
query=miR7803b-3p, target=R03G\_11962, score=1, range=135-157, str  
target 5' AGUACAUGAUUGGCGACGUGUCA 3'  
.....  
query 3' UCAUGUACUAACUGCUGCACAGU 5'  
query=miR7803b-3p, target=R03G\_06433, score=1, range=135-157, str  
target 5' AGUACAUGAUUGGCGACGUGUCA 3'  
.....  
query 3' UCAUGUACUAACUGCUGCACAGU 5'  
query=miR7803b-3p, target=R03G\_05521, score=1, range=290-312, str  
target 5' CGUACAUGAUUGACGACGUGUCA 3'  
.....  
query 3' UCAUGUACUAACUGCUGCACAGU 5'  
query=miR7803b-3p, target=R03G\_01205, score=1.5, range=411-433,  
strand=1  
target 5' AGUACAUGAUUGGCGACGUGUCG 3'  
.....  
query 3' UCAUGUACUAACUGCUGCACAGU 5'  
query=miR7803b-3p, target=R03G\_00238, score=1.5, range=411-433,  
strand=1  
target 5' AGUACAUGAUUGGCGACGUGUCG 3'  
.....  
query 3' UCAUGUACUAACUGCUGCACAGU 5'  
query=miR7803b-3p, target=R03G\_16698, score=1.5, range=408-430,  
strand=1



target 5' AGUACAUGAUUGGCGACGUGUUA 3'  
 :::::::::::::::::::::::::::::::

query 3' UCAUGUACUAACUGCUGCACAGU 5'  
 query=miR7803b-3p, target=R03G\_09193, score=2, range=135-157, str  
 target 5' AGUACAUGAUUGGCGACGUGUUA 3'  
 :::::::::::::::::::::::::::::::

query 3' UCAUGUACUAACUGCUGCACAGU 5'  
 query=miR7803b-3p, target=R03G\_04682, score=2, range=411-433, str  
 target 5' AGUACAUGAUUGGCGACGUGUUA 3'  
 :::::::::::::::::::::::::::::::

query 3' UCAUGUACUAACUGCUGCACAGU 5'  
 query=miR7803b-3p, target=R03G\_10771, score=2, range=162-184, str  
 target 5' AGUACAUAUUUGGCGACGUGUCA 3'  
 :::::::::: ::::::::::::::::::::::

query 3' UCAUGUACUAACUGCUGCACAGU 5'  
 query=miR7803b-3p, target=R03G\_07739, score=3, range=162-184, str  
 target 5' AGUACAUGAUUGGCGUCGUGUCA 3'  
 :::::::::::::::::::::: ::::::::::

query 3' UCAUGUACUAACUGCUGCACAGU 5'  
 query=miR7803b-3p, target=R03G\_14770, score=3.5, range=411-433,  
 strand=1  
 target 5' AGUACAUGAUUGGCGACGUGCCG 3'  
 :::::::::::::::::::::::::::::: :.

query 3' UCAUGUACUAACUGCUGCACAGU 5'  
 query=miR7803b-3p, target=R03G\_07984, score=3.5, range=411-433,  
 strand=1  
 target 5' AGUACAUGAUUGGCGACGUGCCG 3'  
 :::::::::::::::::::::::::::::: :.

query 3' UCAUGUACUAACUGCUGCACAGU 5'  
 query=miR2082, target=R03G\_07738, score=0, range=93-114, strand=-  
 target 5' AAGAGAAGAAGAAGGAACAACA 3'  
 :::::::::::::::::::::::::::::::

query 3' UUCUCUUCUUCUUCUUCUUGUUGU 5'  
 query=miR2082, target=R03G\_01726, score=0, range=93-114, strand=-  
 target 5' AAGAGAAGAAGAAGGAACAACA 3'  
 :::::::::::::::::::::::::::::::

query 3' UUCUCUUCUUCUUCUUCUUGUUGU 5'  
 query=miR2082, target=R03G\_11537, score=0, range=93-114, strand=-  
 target 5' AAGAGAAGAAGAAGGAACAACA 3'  
 :::::::::::::::::::::::::::::::

query 3' UUCUCUUCUUCUUCUUCUUGUUGU 5'  
 query=miR2082, target=R03G\_11236, score=0, range=93-114, strand=-  
 target 5' AAGAGAAGAAGAAGGAACAACA 3'  
 :::::::::::::::::::::::::::::::

query 3' UUCUCUUCUUCUUCUUCUUGUUGU 5'



query=miR2082, target=R03G\_07981, score=0, range=93-114, strand=-  
target 5' AAGAGAAGAAGAAGGAACAACA 3'  
::::::::::::::::::::::::::  
query 3' UUCUCUUCUUCUUCUCCUUGUUGU 5'  
query=miR2082, target=R03G\_07696, score=0, range=93-114, strand=-  
target 5' AAGAGAAGAAGAAGGAACAACA 3'  
::::::::::::::::::::::::::  
query 3' UUCUCUUCUUCUUCUCCUUGUUGU 5'  
query=miR2082, target=R03G\_06730, score=0, range=93-114, strand=-  
target 5' AAGAGAAGAAGAAGGAACAACA 3'  
::::::::::::::::::::::::::  
query 3' UUCUCUUCUUCUUCUCCUUGUUGU 5'  
query=miR2082, target=R03G\_07720, score=0, range=93-114, strand=-  
target 5' AAGAGAAGAAGAAGGAACAACA 3'  
::::::::::::::::::::::::::  
query 3' UUCUCUUCUUCUUCUCCUUGUUGU 5'  
query=miR2082, target=R03G\_04211, score=0, range=93-114, strand=-  
target 5' AAGAGAAGAAGAAGGAACAACA 3'  
::::::::::::::::::::::::::  
query 3' UUCUCUUCUUCUUCUCCUUGUUGU 5'  
query=miR2082, target=R03G\_09602, score=0, range=93-114, strand=-  
target 5' AAGAGAAGAAGAAGGAACAACA 3'  
::::::::::::::::::::::::::  
query 3' UUCUCUUCUUCUUCUCCUUGUUGU 5'  
query=miR2082, target=R03G\_07306, score=0, range=93-114, strand=-  
target 5' AAGAGAAGAAGAAGGAACAACA 3'  
::::::::::::::::::::::::::  
query 3' UUCUCUUCUUCUUCUCCUUGUUGU 5'  
query=miR2082, target=R03G\_14551, score=0, range=93-114, strand=-  
target 5' AAGAGAAGAAGAAGGAACAACA 3'  
::::::::::::::::::::::::::  
query 3' UUCUCUUCUUCUUCUCCUUGUUGU 5'  
query=miR2082, target=R03G\_09929, score=0, range=93-114, strand=-  
target 5' AAGAGAAGAAGAAGGAACAACA 3'  
::::::::::::::::::::::::::  
query 3' UUCUCUUCUUCUUCUCCUUGUUGU 5'  
query=miR2082, target=R03G\_15897, score=0, range=93-114, strand=-  
target 5' AAGAGAAGAAGAAGGAACAACA 3'  
::::::::::::::::::::::::::  
query 3' UUCUCUUCUUCUUCUCCUUGUUGU 5'  
query=miR2082, target=R03G\_09603, score=0, range=93-114, strand=-  
target 5' AAGAGAAGAAGAAGGAACAACA 3'  
::::::::::::::::::::::::::  
query 3' UUCUCUUCUUCUUCUCCUUGUUGU 5'  
query=miR2082, target=R03G\_10218, score=0, range=93-114, strand=-

```

target 5' AAGAGAAGAAGAAGGAACAACA 3'
::::::::::::::::::::::::::
query 3' UUCUCUUCUUCUUCUCCUUGUUGU 5'
query=miR2082, target=R03G_16748, score=0, range=93-114, strand=-
target 5' AAGAGAAGAAGAAGGAACAACA 3'
::::::::::::::::::::::::::
query 3' UUCUCUUCUUCUUCUCCUUGUUGU 5'
query=miR2082, target=R03G_11977, score=0, range=93-114, strand=-
target 5' AAGAGAAGAAGAAGGAACAACA 3'
::::::::::::::::::::::::::
query 3' UUCUCUUCUUCUUCUCCUUGUUGU 5'
query=miR2082, target=R03G_02228, score=0, range=93-114, strand=-
target 5' AAGAGAAGAAGAAGGAACAACA 3'
::::::::::::::::::::::::::
query 3' UUCUCUUCUUCUUCUCCUUGUUGU 5'
query=miR2082, target=R03G_13272, score=0, range=93-114, strand=-
target 5' AAGAGAAGAAGAAGGAACAACA 3'
::::::::::::::::::::::::::
query 3' UUCUCUUCUUCUUCUCCUUGUUGU 5'
query=miR2082, target=R03G_06990, score=1, range=93-114, strand=-
target 5' AAGAGAAGAAGAAGGAACAGCA 3'
::::::::::::::::::::::::::
query 3' UUCUCUUCUUCUUCUCCUUGUUGU 5'
query=miR2082, target=R03G_10041, score=1.5, range=93-115, strand
target 5' AAGAAGAAGGAGAAGGAACAACA 3'
::: ::::::::::::::::::::
query 3' UUC-UCUUCUUCUUCUCCUUGUUGU 5'
query=miR2082, target=R03G_17248, score=1.5, range=93-115, strand
target 5' AAGAAGAAGGAGAAGGAACAACA 3'
::: ::::::::::::::::::::
query 3' UUC-UCUUCUUCUUCUCCUUGUUGU 5'
query=miR2082, target=R03G_10775, score=1.5, range=93-115, strand
target 5' AAGAAGAAGGAGAAGGAACAACA 3'
::: ::::::::::::::::::::
query 3' UUC-UCUUCUUCUUCUCCUUGUUGU 5'
query=miR2082, target=R03G_03584, score=1.5, range=27-49, strand=
target 5' AAGAAGAAGGAGAAGGAACAACA 3'
::: ::::::::::::::::::::
query 3' UUC-UCUUCUUCUUCUCCUUGUUGU 5'
query=miR2082, target=R03G_13146, score=1.5, range=93-115, strand
target 5' AAGAAGAAGGAGAAGGAACAACA 3'
::: ::::::::::::::::::::
query 3' UUC-UCUUCUUCUUCUCCUUGUUGU 5'
query=miR2082, target=R03G_15890, score=1.5, range=93-115, strand
target 5' AAGAAGAAGGAGAAGGAACAACA 3'

```

```

::: ::::::::::::::::::::
query 3' UUC-UCUUCUUCUUCUUCUUGUUGU 5'
query=miR2082, target=R03G_17256, score=1.5, range=93-115, strand
target 5' AAGAAGAAGGAGAAGGAACAACA 3'
::: ::::::::::::::::::::
query 3' UUC-UCUUCUUCUUCUUCUUGUUGU 5'
query=miR2082, target=R03G_05425, score=1.5, range=93-115, strand
target 5' AAGAAGAAGGAGAAGGAACAACA 3'
::: ::::::::::::::::::::
query 3' UUC-UCUUCUUCUUCUUCUUGUUGU 5'
query=miR2082, target=R03G_17350, score=1.5, range=93-115, strand
target 5' AAGAAGAAGGAGAAGGAACAACA 3'
::: ::::::::::::::::::::
query 3' UUC-UCUUCUUCUUCUUCUUGUUGU 5'
query=miR2082, target=R03G_16137, score=1.5, range=93-115, strand
target 5' AAGAAGAAGGAGAAGGAACAACA 3'
::: ::::::::::::::::::::
query 3' UUC-UCUUCUUCUUCUUCUUGUUGU 5'
query=miR2082, target=R03G_00288, score=1.5, range=93-115, strand
target 5' AAGAAGAAGGAGAAGGAACAACA 3'
::: ::::::::::::::::::::
query 3' UUC-UCUUCUUCUUCUUCUUGUUGU 5'
query=miR2082, target=R03G_09182, score=1.5, range=93-115, strand
target 5' AAGAAGAAGGAGAAGGAACAACA 3'
::: ::::::::::::::::::::
query 3' UUC-UCUUCUUCUUCUUCUUGUUGU 5'
query=miR2082, target=R03G_04679, score=1.5, range=93-115, strand
target 5' AAGAAGAAGGAGAAGGAACAACA 3'
::: ::::::::::::::::::::
query 3' UUC-UCUUCUUCUUCUUCUUGUUGU 5'
query=miR2082, target=R03G_10488, score=3, range=987-1008, strand
target 5' AAGAGUAGAAGAAGGAACACCA 3'
::::: :::::::::::::::::::: ::
query 3' UUCUCUUCUUCUUCUUCUUGUUGU 5'
query=miR2082, target=R03G_01565, score=3, range=216-238, strand=
target 5' AAGAAGAAGCAGAGGGAACAACA 3'
::: :::::: ::::::::::::::::::::
query 3' UUC-UCUUCUUCUUCUUCUUGUUGU 5'
query=miR2082, target=R03G_13069, score=3.5, range=941-962, stran
target 5' AAGAAAGGAAGAAGAAACAACA 3'
::::: :::::::::::::::::::: :::::::
query 3' UUCUCUUCUUCUUCUUCUUGUUGU 5'
query=miR2082, target=R03G_06764, score=3.5, range=60-80, strand=
target 5' ACGGGAAGAAGAA-GAACAACA 3'
: :::::::::::::::::::: :::::::

```

query 3' UUCUCUUCUUCUUCUCCUUGUUGU 5'  
query=miR2082, target=R03G\_08916, score=3.5, range=9-30, strand=-  
target 5' AAGAGAAGGAGGAGGAGCAACU 3'  
.....  
query 3' UUCUCUUCUUCUUCUCCUUGUUGU 5'  
query=miR2082, target=R03G\_02306, score=3.5, range=498-519, stran  
target 5' UGGAGCAGAAGAAGGAACAGCA 3'  
. . . . .  
query 3' UUCUCUUCUUCUUCUCCUUGUUGU 5'  
query=miR2082, target=R03G\_06282, score=3.5, range=216-238, stran  
target 5' AAGAGGAAGCAGAGGGAACAACG 3'  
. . . . .  
query 3' UUCU-CUUCUUCUUCUCCUUGUUGU 5'  
query=miR2082, target=R03G\_10686, score=3.5, range=216-238, stran  
target 5' AAGAGGAAGCAGAGGGAACAACG 3'  
. . . . .  
query 3' UUCU-CUUCUUCUUCUCCUUGUUGU 5'  
query=miR2082, target=R03G\_14846, score=3.5, range=216-238, stran  
target 5' AAGAGGAAGCAGAGGGAACAACG 3'  
. . . . .  
query 3' UUCU-CUUCUUCUUCUCCUUGUUGU 5'  
query=miR2082, target=R03G\_03704, score=4, range=137-158, strand=  
target 5' AAGAGGAGGAGGAGGAACAAGA 3'  
..... :  
query 3' UUCUCUUCUUCUUCUCCUUGUUGU 5'  
query=miR2082, target=R03G\_04239, score=4, range=1229-1249, stran  
target 5' GGGAGAAGAAGAAGGAA-AAUA 3'  
..... :  
query 3' UUCUCUUCUUCUUCUCCUUGUUGU 5'  
query=miR2082, target=R03G\_05980, score=4, range=210-231, strand=  
target 5' UAGAGAAGAAGAAGGAAUAUCA 3'  
..... :  
query 3' UUCUCUUCUUCUUCUCCUUGUUGU 5'  
query=miR2082, target=R03G\_04776, score=4, range=510-530, strand=  
target 5' AGGAGGAGAAGAAGG-ACAACU 3'  
..... :  
query 3' UUCUCUUCUUCUUCUCCUUGUUGU 5'  
query=miR2082, target=R03G\_03818, score=4, range=3595-3617, stran  
target 5' AAGCAAAGAAGAAGGAACAAGA 3'  
. . . :  
query 3' UUC-UCUUCUUCUUCUCCUUGUUGU 5'  
query=miR2082, target=R03G\_14402, score=4, range=1206-1227, stran  
target 5' AAGCGAUGAAGAAGAAACAACA 3'  
. . . :  
query 3' UUCUCUUCUUCUUCUCCUUGUUGU 5'

query=miR2082, target=R03G\_06260, score=4, range=656-676, strand=  
target 5' GGGAAAAGAAGAAGGAA-AACA 3'  
..... : : : :  
query 3' UUCUCUUCUUCUUCUCCUUGUUGU 5'  
query=miR2082, target=R03G\_08027, score=4, range=587-608, strand=  
target 5' AAAAGAAAAAGAAGGAACAAGA 3'  
: : : : : : : : : : : : : :  
query 3' UUCUCUUCUUCUUCUCCUUGUUGU 5'  
query=miR2082, target=R03G\_05645, score=4, range=454-476, strand=  
target 5' AAGAAGAACAAGAAGGAAAAACA 3'  
: : : : : : : : : : : : : :  
query 3' UUC-UCUUCUUCUUCUCCUUGUUGU 5'  
query=miR2082, target=R03G\_08171, score=4, range=1410-1432, stran  
target 5' AAGAUGGAGGAGAAGGAAUGACA 3'  
: : : : : : : : : : : : : :  
query 3' UUCU-CUUCUUCUUCUCCUUGUUGU 5'  
query=miR2082, target=R03G\_15990, score=4, range=1192-1212, stran  
target 5' AGGAGAAGGAGAAGGAG-AACA 3'  
: : : : : : : : : : : : : :  
query 3' UUCUCUUCUUCUUCUCCUUGUUGU 5'  
query=miR2082, target=R03G\_12011, score=4, range=93-114, strand=-  
target 5' GGGAGCAGAAGCAGGAACAACA 3'  
..... : : : : : : : : : :  
query 3' UUCUCUUCUUCUUCUCCUUGUUGU 5'  
query=miR2082, target=R03G\_17433, score=4, range=93-114, strand=-  
target 5' GGGAGCAGAAGCAGGAACAACA 3'  
..... : : : : : : : : : :  
query 3' UUCUCUUCUUCUUCUCCUUGUUGU 5'  
query=miR2082, target=R03G\_16743, score=4, range=120-141, strand=  
target 5' AGGAGCAGGAGCAGGAACAACA 3'  
..... : : : : : : : : : :  
query 3' UUCUCUUCUUCUUCUCCUUGUUGU 5'  
query=miR2082, target=R03G\_04659, score=4, range=54-75, strand=-1  
target 5' GGGAGCAGAAGCAGGAACAACA 3'  
..... : : : : : : : : : :  
query 3' UUCUCUUCUUCUUCUCCUUGUUGU 5'  
query=miR2082, target=R03G\_07692, score=4, range=27-48, strand=-1  
target 5' GGGAGCAGAAGCAGGAACAACA 3'  
..... : : : : : : : : : :  
query 3' UUCUCUUCUUCUUCUCCUUGUUGU 5'  
query=miR2082, target=R03G\_15879, score=4, range=93-114, strand=-  
target 5' GGGAGCAGAAGCAGGAACAACA 3'  
..... : : : : : : : : : :  
query 3' UUCUCUUCUUCUUCUCCUUGUUGU 5'  
query=miR2082, target=R03G\_13452, score=4, range=93-114, strand=-

target 5' GGGAGCAGAAGCAGGAACAACA 3'  
.....  
query 3' UUCUCUUCUUCUCCUUGUUGU 5'  
query=miR2082, target=R03G\_16369, score=4, range=93-114, strand=-  
target 5' GGGAGCAGAAGCAGGAACAACA 3'  
.....  
query 3' UUCUCUUCUUCUCCUUGUUGU 5'  
query=miR2082, target=R03G\_14553, score=4, range=93-114, strand=-  
target 5' GGGAGCAGAAGCAGGAACAACA 3'  
.....  
query 3' UUCUCUUCUUCUCCUUGUUGU 5'  
query=miR2082, target=R03G\_11543, score=4, range=93-114, strand=-  
target 5' GGGAGCAGAAGCAGGAACAACA 3'  
.....  
query 3' UUCUCUUCUUCUCCUUGUUGU 5'  
query=miR2082, target=R03G\_15887, score=4, range=93-114, strand=-  
target 5' GGGAGCAGAAGCAGGAACAACA 3'  
.....  
query 3' UUCUCUUCUUCUCCUUGUUGU 5'  
query=miR2082, target=R03G\_05347, score=4, range=93-114, strand=-  
target 5' GGGAGCAGAAGCAGGAACAACA 3'  
.....  
query 3' UUCUCUUCUUCUCCUUGUUGU 5'  
query=miR2082, target=R03G\_12976, score=4, range=93-114, strand=-  
target 5' GGGAGCAGAAGCAGGAACAACA 3'  
.....  
query 3' UUCUCUUCUUCUCCUUGUUGU 5'  
query=miR2082, target=R03G\_16743, score=4, range=93-114, strand=-  
target 5' GGGAGCAGAAGCAGGAACAACA 3'  
.....  
query 3' UUCUCUUCUUCUCCUUGUUGU 5'  
query=miR5038a, target=R03G\_17155, score=0, range=632-652, strand  
target 5' UGGAAAAGGCCAAGAUUCCCA 3'  
.....  
query 3' ACCUUUCCGGUUCUAAGGGU 5'  
query=miR5038a, target=R03G\_05926, score=0, range=632-652, strand  
target 5' UGGAAAAGGCCAAGAUUCCCA 3'  
.....  
query 3' ACCUUUCCGGUUCUAAGGGU 5'  
query=miR5038a, target=R03G\_09928, score=0, range=632-652, strand  
target 5' UGGAAAAGGCCAAGAUUCCCA 3'  
.....  
query 3' ACCUUUCCGGUUCUAAGGGU 5'  
query=miR5038a, target=R03G\_12668, score=0, range=545-565, strand  
target 5' UGGAAAAGGCCAAGAUUCCCA 3'



```
.....
query 3' GACUACGAGACCGUAUAAGU 5'
query=miR9674b-3p, target=R03G_13459, score=1, range=250-269, str
target 5' CCGAUGCUCUGGCAUAUUCA 3'
: .....
query 3' GACUACGAGACCGUAUAAGU 5'
query=miR9674b-3p, target=R03G_17251, score=2, range=553-572, str
target 5' CUGAUGCUCUGGCAUAUACA 3'
..... ::
query 3' GACUACGAGACCGUAUAAGU 5'
query=miR9674b-3p, target=R03G_16366, score=2, range=2845-2864,
strand=1
target 5' CUGAUGCUCUGGCAUAUACA 3'
..... ::
query 3' GACUACGAGACCGUAUAAGU 5'
query=miR9674b-3p, target=R03G_17156, score=2.5, range=1102-1121,
strand=1
target 5' UUGAUGCUCUGGCAUAUCCA 3'
..... ::
query 3' GACUACGAGACCGUAUAAGU 5'
query=miR9674b-3p, target=R03G_02475, score=3, range=1496-1514,
strand=1
target 5' AUUAU-CUCUGGCAUAUUCA 3'
: :: .....
query 3' GACUACGAGACCGUAUAAGU 5'
query=miR9674b-3p, target=R03G_13580, score=3.5, range=332-351,
strand=-1
target 5' UAAAUGCUCUGGCAUGUUCA 3'
. ....
query 3' GACUACGAGACCGUAUAAGU 5'
query=miR9674b-3p, target=R03G_12833, score=4, range=1483-1501,
strand=1
target 5' AUGAU-CUCUGGUAUAUUC 3'
:::: .....
query 3' GACUACGAGACCGUAUAAGU 5'
query=miR9674b-3p, target=R03G_07810, score=4, range=365-385,
strand=-1
target 5' CUGGUGUCUCUGGUAUAUUUG 3'
::::: .....
query 3' GACUAC-GAGACCGUAUAAGU 5'
query=miR9674b-3p, target=R03G_01002, score=4, range=1592-1611,
strand=-1
target 5' CUGUUGCUCUGGUAUAUUAA 3'
::: ..... :
query 3' GACUACGAGACCGUAUAAGU 5'
```



```

query=miR9674b-3p, target=R03G_07279, score=4, range=3078-3097,
strand=-1
target 5' CUGUUGC UUUGGCAGAUUCA 3'
::: ::::: ::::: :::::
query 3' GACUACGAGACCGUAUAAGU 5'
query=miR9674b-3p, target=R03G_16585, score=4, range=188-206,
strand=-1
target 5' CUG-UGGUCUGGAAUAUUCA 3'
::: :: ::::: :::::
query 3' GACUACGAGACCGUAUAAGU 5'
query=miR528-5p, target=R03G_09951, score=0, range=29-49, strand=
target 5' CCUCCUCUCAUCCCCAUUCCA 3'
:::::
query 3' GGAGGAGAGUAGGGGUAAGGU 5'
query=miR528-5p, target=R03G_05148, score=4, range=400-420, stran
target 5' CCACCUGUCAUCCCUAUUCU 3'
:: ::: :::::
query 3' GGAGGAGAGUAGGGGUAAGGU 5'
query=miR528-5p, target=R03G_05364, score=4, range=1573-1593,
strand=-1
target 5' UCUUUUUUCAUCCGCAUUCCA 3'
.....
query 3' GGAGGAGAGUAGGGGUAAGGU 5'
query=miR528-5p, target=R03G_05871, score=4, range=955-975, stran
target 5' UCUCCACUCAUCCCUAUUUCG 3'
.....
query 3' GGAGGAGAGUAGGGGUAAGGU 5'
query=miR4397-3p, target=R03G_07123, score=0, range=769-790, stra
target 5' AGUCUUUCUCCACAUCUUUGAA 3'
:::::
query 3' UCAGAAAGAGGUGUAGAAACUU 5'
query=miR4397-3p, target=R03G_11284, score=0, range=1012-1033,
strand=-1
target 5' AGUCUUUCUCCACAUCUUUGAA 3'
:::::
query 3' UCAGAAAGAGGUGUAGAAACUU 5'
query=miR4397-3p, target=R03G_13853, score=0, range=58-79, strand
target 5' AGUCUUUCUCCACAUCUUUGAA 3'
:::::
query 3' UCAGAAAGAGGUGUAGAAACUU 5'
query=miR4397-3p, target=R03G_00705, score=0, range=1012-1033,
strand=-1
target 5' AGUCUUUCUCCACAUCUUUGAA 3'
:::::
query 3' UCAGAAAGAGGUGUAGAAACUU 5'

```





query=miR482e, target=R03G\_11778, score=2, range=1072-1092, stran  
target 5' CUUAGGCAGAGGAAUAGGUAA 3'  
::: :::::::::::::::::::::  
query 3' GAA-CCGUCUCCUUAUCCGUU 5'  
query=miR482e, target=R03G\_16408, score=2, range=1072-1092, stran  
target 5' CUUGGGAAGAGGAAUAGGCAA 3'  
::: :: :::::::::::::::::::::  
query 3' GAA-CCGUCUCCUUAUCCGUU 5'  
query=miR482e, target=R03G\_08310, score=3, range=129-148, strand=  
target 5' AUUGACCGAGGAAUAGGCAA 3'  
::: : :::::::::::::::::::::  
query 3' GAACCGUCUCCUUAUCCGUU 5'  
query=miR482e, target=R03G\_00068, score=3.5, range=277-296, stran  
target 5' GGUGGAGGAGGAAUAGGCAA 3'  
::: .:::::::::::::::::::  
query 3' GAACCGUCUCCUUAUCCGUU 5'  
query=miR482e, target=R03G\_05305, score=4, range=1161-1179, stran  
target 5' CUUGGCUGAGGAA-GGGCAA 3'  
:::::: :::::::::: .:::::  
query 3' GAACCGUCUCCUUAUCCGUU 5'  
query=miR482e, target=R03G\_08315, score=4, range=129-147, strand=  
target 5' AUUAGCAGAGGAA-AGGCAA 3'  
:: :::::::::: ::::::::::  
query 3' GAACCGUCUCCUUAUCCGUU 5'  
query=miR482e, target=R03G\_02737, score=4, range=2080-2100, stran  
target 5' AUUAGCACGGGGAAUAGGCAA 3'  
:: ::: .:::::::::::::::::::  
query 3' GAACCGU-CUCCUUAUCCGUU 5'  
query=miR482e, target=R03G\_10728, score=4, range=991-1011, strand  
target 5' CUUGGGAAGAGAAAUAGGCAA 3'  
::: :: ::::: :::::::::::::::  
query 3' GAA-CCGUCUCCUUAUCCGUU 5'  
query=miR482e, target=R03G\_03247, score=4, range=508-526, strand=  
target 5' CUUCACA-AGGAAUAGGCAA 3'  
::: :: :::::::::::::::::::::  
query 3' GAACCGUCUCCUUAUCCGUU 5'  
query=miR7716-5p, target=R03G\_15587, score=1, range=212-234, stra  
target 5' GUCUCGUUCUUAUUAUCAGCUA 3'  
:::::::::::::::::::::::::::::  
query 3' CAGAGCAAGAAUGAAUAGUUGAU 5'  
query=miR7716-5p, target=R03G\_08791, score=3, range=128-150, stra  
target 5' GUCUCGUUCUGGCUUAUCAACUA 3'  
::::::::::::: .:::::::::::::::::::  
query 3' CAGAGCAAGAAUGAAUAGUUGAU 5'  
query=miR3707, target=R03G\_13812, score=0, range=985-1007, strand



query 3' GAACGGAUAAAGGAGACGGAUU 5'  
query=miR5766, target=R03G\_12958, score=0, range=891-911, strand=  
target 5' CUUGCCUAUUCUCUGCCUAA 3'  
query 3' GAACGGAUAAAGGAGACGGAUU 5'  
query=miR5766, target=R03G\_17425, score=0, range=1071-1091, stran  
target 5' CUUGCCUAUUCUCUGCCUAA 3'  
query 3' GAACGGAUAAAGGAGACGGAUU 5'  
query=miR5766, target=R03G\_15259, score=1, range=1071-1091, stran  
target 5' CUUACCUAUUCUCUGCCUAA 3'  
query 3' GAACGGAUAAAGGAGACGGAUU 5'  
query=miR5766, target=R03G\_11778, score=1, range=1071-1091, stran  
target 5' CUUACCUAUUCUCUGCCUAA 3'  
query 3' GAACGGAUAAAGGAGACGGAUU 5'  
query=miR5766, target=R03G\_08741, score=3, range=1074-1094, stran  
target 5' CUAGCAUUAUUCUCUGCCUGA 3'  
query 3' GAACGGAUAAAGGAGACGGAUU 5'  
query=miR5766, target=R03G\_16408, score=4, range=1071-1091, stran  
target 5' CUUGCCUAUUCUCUUCCTAA 3'  
query 3' GAACGGAUAAAGGAGACGGAUU 5'  
query=miR7763-5p, target=R03G\_19004, score=0, range=1548-1569,  
strand=-1  
target 5' CUAUCCCCAGCACGAUGAAGUU 3'  
query 3' GAUAGGGGUCGUGCUACUCAA 5'  
query=miR7763-5p, target=R03G\_19001, score=0, range=1252-1273,  
strand=-1  
target 5' CUAUCCCCAGCACGAUGAAGUU 3'  
query 3' GAUAGGGGUCGUGCUACUCAA 5'  
query=miR7763-5p, target=R03G\_05488, score=4, range=1808-1829,  
strand=1  
target 5' CUAACCCCAUCAUGAUGAAGUU 3'  
query 3' GAUAGGGGUCGUGCUACUCAA 5'  
query=miR7763-5p, target=R03G\_00708, score=4, range=1739-1760,  
strand=1  
target 5' CUAACCCCAUCAUGAUGAAGUU 3'

query 3' GAUAGGGGUCGUGCUACUCAA 5'  
query=miR7763-5p, target=R03G\_00340, score=4, range=1226-1246,  
strand=-1  
target 5' CU-UCUUCAGCACGACGAAGUU 3'  
:: ..... :  
query 3' GAUAGGGGUCGUGCUACUCAA 5'  
query=miR5227, target=R03G\_04218, score=0, range=837-858, strand=  
target 5' AUCCUCAACUUCUUCUUCUUCA 3'  
:.....  
query 3' UAGGAGUUGAAGAAGAAGAAGU 5'  
query=miR5227, target=R03G\_02836, score=0, range=837-858, strand=  
target 5' AUCCUCAACUUCUUCUUCUUCA 3'  
:.....  
query 3' UAGGAGUUGAAGAAGAAGAAGU 5'  
query=miR5227, target=R03G\_09957, score=0, range=837-858, strand=  
target 5' AUCCUCAACUUCUUCUUCUUCA 3'  
:.....  
query 3' UAGGAGUUGAAGAAGAAGAAGU 5'  
query=miR5227, target=R03G\_16134, score=0, range=837-858, strand=  
target 5' AUCCUCAACUUCUUCUUCUUCA 3'  
:.....  
query 3' UAGGAGUUGAAGAAGAAGAAGU 5'  
query=miR5227, target=R03G\_15284, score=0, range=837-858, strand=  
target 5' AUCCUCAACUUCUUCUUCUUCA 3'  
:.....  
query 3' UAGGAGUUGAAGAAGAAGAAGU 5'  
query=miR5227, target=R03G\_03104, score=0, range=837-858, strand=  
target 5' AUCCUCAACUUCUUCUUCUUCA 3'  
:.....  
query 3' UAGGAGUUGAAGAAGAAGAAGU 5'  
query=miR5227, target=R03G\_09933, score=0, range=837-858, strand=  
target 5' AUCCUCAACUUCUUCUUCUUCA 3'  
:.....  
query 3' UAGGAGUUGAAGAAGAAGAAGU 5'  
query=miR5227, target=R03G\_01940, score=0, range=795-816, strand=  
target 5' AUCCUCAACUUCUUCUUCUUCA 3'  
:.....  
query 3' UAGGAGUUGAAGAAGAAGAAGU 5'  
query=miR5227, target=R03G\_10229, score=0, range=249-270, strand=  
target 5' AUCCUCAACUUCUUCUUCUUCA 3'  
:.....  
query 3' UAGGAGUUGAAGAAGAAGAAGU 5'  
query=miR5227, target=R03G\_07675, score=0, range=249-270, strand=  
target 5' AUCCUCAACUUCUUCUUCUUCA 3'  
:.....

query 3' UAGGAGUUGAAGAAGAAGAAGU 5'  
query=miR5227, target=R03G\_10898, score=1.5, range=108-129, stran  
target 5' UUCCUCAUUUCUUCUUCUUCA 3'  
.....  
query 3' UAGGAGUUGAAGAAGAAGAAGU 5'  
query=miR5227, target=R03G\_01819, score=1.5, range=1071-1092,  
strand=-1  
target 5' AUCCUCGUCUUCUUCUUCUUCA 3'  
.....  
query 3' UAGGAGUUGAAGAAGAAGAAGU 5'  
query=miR5227, target=R03G\_08358, score=2, range=1089-1110, stran  
target 5' AUCCUCUACUUCUUCUUCUUCU 3'  
.....  
query 3' UAGGAGUUGAAGAAGAAGAAGU 5'  
query=miR5227, target=R03G\_04876, score=2, range=452-472, strand=  
target 5' AUUC-CAUUUCUUCUUCUUCA 3'  
...  
query 3' UAGGAGUUGAAGAAGAAGAAGU 5'  
query=miR5227, target=R03G\_03732, score=2, range=510-530, strand=  
target 5' AUCCUU-GCUUCUUCUUCUUCA 3'  
.....  
query 3' UAGGAGUUGAAGAAGAAGAAGU 5'  
query=miR5227, target=R03G\_08993, score=2, range=144-165, strand=  
target 5' AUCCUCUUCUUCUUCUUCUUCA 3'  
.....  
query 3' UAGGAGUUGAAGAAGAAGAAGU 5'  
query=miR5227, target=R03G\_07832, score=2, range=630-651, strand=  
target 5' AUCCUCCUCUUCUUCUUCUUCA 3'  
.....  
query 3' UAGGAGUUGAAGAAGAAGAAGU 5'  
query=miR5227, target=R03G\_13189, score=2.5, range=216-237, stran  
target 5' CUCCUCGACUUCUUCUUCUUCU 3'  
.....  
query 3' UAGGAGUUGAAGAAGAAGAAGU 5'  
query=miR5227, target=R03G\_16997, score=2.5, range=879-900, stran  
target 5' AUCUUCGGAUUCUUCUUCUUCA 3'  
.....  
query 3' UAGGAGUUGAAGAAGAAGAAGU 5'  
query=miR5227, target=R03G\_09023, score=2.5, range=879-900, stran  
target 5' AUCUUCGGAUUCUUCUUCUUCA 3'  
.....  
query 3' UAGGAGUUGAAGAAGAAGAAGU 5'  
query=miR5227, target=R03G\_00109, score=2.5, range=642-663, stran  
target 5' AUCCUCACUUCUUCUUCUUCUCC 3'  
.....





query 3' UAGGAGUUGAAGAAGAAGAAGU 5'  
query=miR5227, target=R03G\_07001, score=3, range=171-192, strand=  
target 5' AUCCUCUUCUUCUUCUUCUUCU 3'  
query 3' UAGGAGUUGAAGAAGAAGAAGU 5'  
query=miR5227, target=R03G\_07000, score=3, range=171-192, strand=  
target 5' AUCCUCUUCUUCUUCUUCUUCU 3'  
query 3' UAGGAGUUGAAGAAGAAGAAGU 5'  
query=miR5227, target=R03G\_05565, score=3, range=663-684, strand=  
target 5' CUCCACACCUUCUUCUUCUUCA 3'  
query 3' UAGGAGUUGAAGAAGAAGAAGU 5'  
query=miR5227, target=R03G\_05857, score=3, range=27-48, strand=-1  
target 5' CUUUUCAACUUUUUCUUCUUCA 3'  
query 3' UAGGAGUUGAAGAAGAAGAAGU 5'  
query=miR5227, target=R03G\_07659, score=3, range=465-486, strand=  
target 5' AUCUCAAUCUCUUCUUCUUCA 3'  
query 3' UAGGAGUUGAAGAAGAAGAAGU 5'  
query=miR5227, target=R03G\_07328, score=3, range=411-432, strand=  
target 5' AUCCUCACUUUCUUUUUCUUCG 3'  
query 3' UAGGAGUUGAAGAAGAAGAAGU 5'  
query=miR5227, target=R03G\_06107, score=3, range=1311-1332, stran  
target 5' CUCUUCGACUUCUUCUUCUUCU 3'  
query 3' UAGGAGUUGAAGAAGAAGAAGU 5'  
query=miR5227, target=R03G\_14397, score=3, range=1083-1104, stran  
target 5' GGCUUCGAUUUCUUCUUCUUCA 3'  
query 3' UAGGAGUUGAAGAAGAAGAAGU 5'  
query=miR5227, target=R03G\_14329, score=3, range=57-78, strand=-1  
target 5' GUCUUCAUCUUCUUCUUCUUC 3'  
query 3' UAGGAGUUGAAGAAGAAGAAGU 5'  
query=miR5227, target=R03G\_01773, score=3, range=1197-1218, stran  
target 5' AUCUUCGUCUUCUUCUUCUUCU 3'  
query 3' UAGGAGUUGAAGAAGAAGAAGU 5'  
query=miR5227, target=R03G\_02077, score=3, range=396-417, strand=  
target 5' UUCUCCAUUUCUUCUUCUUCA 3'



query=miR5227, target=R03G\_13627, score=3, range=273-294, strand=  
target 5' UUCCUCUUCUUCUUCUUCUUCA 3'  
::::: :::::::::::::::  
query 3' UAGGAGUUGAAGAAGAAGAAGU 5'  
query=miR5227, target=R03G\_16847, score=3, range=936-957, strand=  
target 5' CUCCUCUUCUUCUUCUUCUUCA 3'  
::::: :::::::::::::::  
query 3' UAGGAGUUGAAGAAGAAGAAGU 5'  
query=miR5227, target=R03G\_08412, score=3, range=639-660, strand=  
target 5' AUCCUCUUCUUCUUCUUCUUCU 3'  
::::: :::::::::::::::  
query 3' UAGGAGUUGAAGAAGAAGAAGU 5'  
query=miR5227, target=R03G\_01052, score=3, range=879-900, strand=  
target 5' CUCCUCUUCUUCUUCUUCUUCA 3'  
::::: :::::::::::::::  
query 3' UAGGAGUUGAAGAAGAAGAAGU 5'  
query=miR5227, target=R03G\_03638, score=3, range=162-183, strand=  
target 5' CUCCUCCUCUUCUUCUUCUUCA 3'  
::::: :::::::::::::::  
query 3' UAGGAGUUGAAGAAGAAGAAGU 5'  
query=miR5227, target=R03G\_08508, score=3, range=540-561, strand=  
target 5' AUCCUCUUCUUCUUCUUCUUCU 3'  
::::: :::::::::::::::  
query 3' UAGGAGUUGAAGAAGAAGAAGU 5'  
query=miR5227, target=R03G\_01098, score=3, range=378-399, strand=  
target 5' CUCCUCCUCUUCUUCUUCUUCA 3'  
::::: :::::::::::::::  
query 3' UAGGAGUUGAAGAAGAAGAAGU 5'  
query=miR5227, target=R03G\_15201, score=3, range=543-564, strand=  
target 5' UUCCUCCUCUUCUUCUUCUUCA 3'  
::::: :::::::::::::::  
query 3' UAGGAGUUGAAGAAGAAGAAGU 5'  
query=miR5227, target=R03G\_11593, score=3, range=63-84, strand=-1  
target 5' UUCAUCAUCUUCUUCUUCUUCA 3'  
:: :: :::::::::::::::  
query 3' UAGGAGUUGAAGAAGAAGAAGU 5'  
query=miR5227, target=R03G\_08160, score=3, range=984-1004, strand  
target 5' ACCUUUAA-UUCUUCUUCUUCA 3'  
: ::::::: :::::::::::::::  
query 3' UAGGAGUUGAAGAAGAAGAAGU 5'  
query=miR5227, target=R03G\_09393, score=3, range=744-765, strand=  
target 5' AUCAUCCUCUUCUUCUUCUUCA 3'  
::: :: :::::::::::::::  
query 3' UAGGAGUUGAAGAAGAAGAAGU 5'  
query=miR5227, target=R03G\_08267, score=3, range=1272-1293, stran

target 5' AUCAUCCUCUUCUUCUUCUUCA 3'  
::: :: :  
query 3' UAGGAGUUGAAGAAGAAGAAGU 5'  
query=miR5227, target=R03G\_07283, score=3, range=105-126, strand=  
target 5' CUCUUCGUCUUCUUCUUCUUCA 3'  
:..... :  
query 3' UAGGAGUUGAAGAAGAAGAAGU 5'  
query=miR5227, target=R03G\_05857, score=3, range=174-195, strand=  
target 5' CUCCUCUUCUUCUUCUUCUUCA 3'  
:..... :  
query 3' UAGGAGUUGAAGAAGAAGAAGU 5'  
query=miR5227, target=R03G\_10079, score=3, range=300-322, strand=  
target 5' AUCCAUCACCUUCUUCUUCUUC 3'  
:.... : :  
query 3' UAGG-AGUUGAAGAAGAAGAAGU 5'  
query=miR5227, target=R03G\_11015, score=3.5, range=20-42, strand=  
target 5' GUCUAUCGACUUCUUCUUCUUA 3'  
.... :..... :  
query 3' UAGG-AGUUGAAGAAGAAGAAGU 5'  
query=miR5227, target=R03G\_07279, score=3.5, range=3573-3594, str  
target 5' AUCCUCCGCUUCUUCUUCUCA 3'  
:..... :..... : :  
query 3' UAGGAGUUGAAGAAGAAGAAGU 5'  
query=miR5227, target=R03G\_09917, score=3.5, range=684-705, stran  
target 5' AUCUUCACUUCUUCUUCUUCU 3'  
:..... :..... :  
query 3' UAGGAGUUGAAGAAGAAGAAGU 5'  
query=miR5227, target=R03G\_06244, score=3.5, range=1458-1479, str  
target 5' AUCUUCUUCUUCUUCUUCUUA 3'  
:..... :..... :  
query 3' UAGGAGUUGAAGAAGAAGAAGU 5'  
query=miR5227, target=R03G\_00057, score=3.5, range=1656-1677, str  
target 5' AUCCAGAGCUUCUUCUUCUUCU 3'  
:.... :..... :  
query 3' UAGGAGUUGAAGAAGAAGAAGU 5'  
query=miR5227, target=R03G\_03357, score=3.5, range=48-69, strand=  
target 5' UUCUUCAAGUUCUUCUUCUUCU 3'  
:..... :..... :  
query 3' UAGGAGUUGAAGAAGAAGAAGU 5'  
query=miR5227, target=R03G\_01458, score=3.5, range=858-879, stran  
target 5' CUCUUCUACUUCUUCUUCUUCU 3'  
:.... :..... :  
query 3' UAGGAGUUGAAGAAGAAGAAGU 5'  
query=miR5227, target=R03G\_12945, score=3.5, range=1503-1524, str  
target 5' UUCUUCUUCUUCUUCUUCUUCA 3'

.....  
query 3' UAGGAGUUGAAGAAGAAGAAGU 5'  
query=miR5227, target=R03G\_00312, score=3.5, range=744-765, stran  
target 5' UUCUUCUUCUUCUUCUUCUUCA 3'  
.....  
query 3' UAGGAGUUGAAGAAGAAGAAGU 5'  
query=miR5227, target=R03G\_03738, score=3.5, range=1761-1782, str  
target 5' AUCAGCUGCUUCUUCUUCUUCA 3'  
... : .....  
query 3' UAGGAGUUGAAGAAGAAGAAGU 5'  
query=miR5227, target=R03G\_15453, score=3.5, range=1580-1602, str  
target 5' AACUCAACAUCUUCUUCUUCG 3'  
: .....  
query 3' UAGGAGUUG-AAGAAGAAGAAGU 5'  
query=miR5227, target=R03G\_08622, score=3.5, range=1218-1239,  
strand=-1  
target 5' AUUCUUGACUUCUUCUUCUUUU 3'  
.....  
query 3' UAGGAGUUGAAGAAGAAGAAGU 5'  
query=miR5227, target=R03G\_10411, score=3.5, range=1395-1416,  
strand=-1  
target 5' AAUUUCGACUUUUUCUUCUUCA 3'  
: .....  
query 3' UAGGAGUUGAAGAAGAAGAAGU 5'  
query=miR5227, target=R03G\_10319, score=3.5, range=933-954, stran  
target 5' AUCUUUAGGUUCUUUUUCUUCA 3'  
.....  
query 3' UAGGAGUUGAAGAAGAAGAAGU 5'  
query=miR5227, target=R03G\_02254, score=3.5, range=840-861, stran  
target 5' GUCCACA AUUUUUUCUUCUUCG 3'  
. ....  
query 3' UAGGAGUUGAAGAAGAAGAAGU 5'  
query=miR5227, target=R03G\_06538, score=3.5, range=195-216, stran  
target 5' AUCUUCGUUUUCUUCUUUUUCA 3'  
.....  
query 3' UAGGAGUUGAAGAAGAAGAAGU 5'  
query=miR5227, target=R03G\_13396, score=3.5, range=177-198, stran  
target 5' AUUUUCAAUUACUUCUUCUUCA 3'  
.....  
query 3' UAGGAGUUGAAGAAGAAGAAGU 5'  
query=miR5227, target=R03G\_06685, score=3.5, range=1122-1143,  
strand=-1  
target 5' UUCUUCACUUCUUCUUCUUUA 3'  
.....  
query 3' UAGGAGUUGAAGAAGAAGAAGU 5'

query=miR5227, target=R03G\_11306, score=3.5, range=549-570, strand  
target 5' AUUUUCCGCUUCUUCUUCUCC 3'  
.....  
query 3' UAGGAGUUGAAGAAGAAGAAGU 5'  
query=miR5227, target=R03G\_13926, score=3.5, range=1290-1311,  
strand=-1  
target 5' UCCUUGUUUUCUUCUUCUUCA 3'  
.....  
query 3' UAGGAGUUGAAGAAGAAGAAGU 5'  
query=miR5227, target=R03G\_05498, score=3.5, range=123-144, strand  
target 5' UUCUUCAUCUUCUUCUUUUUCA 3'  
.....  
query 3' UAGGAGUUGAAGAAGAAGAAGU 5'  
query=miR5227, target=R03G\_01827, score=3.5, range=99-120, strand  
target 5' AUCUUCUACUUGUUCUUCUUCA 3'  
.....  
query 3' UAGGAGUUGAAGAAGAAGAAGU 5'  
query=miR5227, target=R03G\_03429, score=3.5, range=1113-1134,  
strand=-1  
target 5' AUCCUCAGAUUCUUCUUCUGCA 3'  
.....  
query 3' UAGGAGUUGAAGAAGAAGAAGU 5'  
query=miR5227, target=R03G\_06850, score=3.5, range=522-543, strand  
target 5' AUCCUCAUCUUCUUCAUCUUCG 3'  
.....  
query 3' UAGGAGUUGAAGAAGAAGAAGU 5'  
query=miR5227, target=R03G\_05173, score=3.5, range=750-771, strand  
target 5' AUCUUCAUCCUCUUCUUCUUCA 3'  
.....  
query 3' UAGGAGUUGAAGAAGAAGAAGU 5'  
query=miR5227, target=R03G\_07261, score=3.5, range=810-831, strand  
target 5' UCCUCUAUUUCUUCUUCUUCU 3'  
.....  
query 3' UAGGAGUUGAAGAAGAAGAAGU 5'  
query=miR5227, target=R03G\_03381, score=3.5, range=507-528, strand  
target 5' CUCUUCUACUUCUUCUUCUUCU 3'  
.....  
query 3' UAGGAGUUGAAGAAGAAGAAGU 5'  
query=miR5227, target=R03G\_11176, score=3.5, range=597-618, strand  
target 5' CUCCUCGUCUUCUUCUUCUUC 3'  
.....  
query 3' UAGGAGUUGAAGAAGAAGAAGU 5'  
query=miR5227, target=R03G\_15658, score=3.5, range=408-429, strand  
target 5' UUCUUCUACUUCUUCUUCUUCU 3'  
.....

query 3' UAGGAGUUGAAGAAGAAGAAGU 5'  
query=miR5227, target=R03G\_11924, score=3.5, range=252-273, stran  
target 5' CUCAUCAGCUUCUUCUUCUUCU 3'  
:: .....  
query 3' UAGGAGUUGAAGAAGAAGAAGU 5'  
query=miR5227, target=R03G\_09312, score=3.5, range=216-238, stran  
target 5' GUUUUAAAGCUUCUUCUUCUUCA 3'  
..... :: .....  
query 3' UAGGAGUU-GAAGAAGAAGAAGU 5'  
query=miR5227, target=R03G\_09135, score=3.5, range=3882-3903,  
strand=-1  
target 5' UUCGGCAAUUUCUUCUUCUUCA 3'  
:: .....  
query 3' UAGGAGUUGAAGAAGAAGAAGU 5'  
query=miR5227, target=R03G\_10467, score=3.5, range=195-216, stran  
target 5' UUCUUCUUCUUCUUCUUCUUCA 3'  
:::: .....  
query 3' UAGGAGUUGAAGAAGAAGAAGU 5'  
query=miR5227, target=R03G\_05884, score=3.5, range=1203-1224,  
strand=-1  
target 5' UUCUUCUUCUUCUUCUUCUUCA 3'  
:::: .....  
query 3' UAGGAGUUGAAGAAGAAGAAGU 5'  
query=miR5227, target=R03G\_01472, score=3.5, range=1404-1425,  
strand=-1  
target 5' UUCUUCUUCUUCUUCUUCUUCA 3'  
:::: .....  
query 3' UAGGAGUUGAAGAAGAAGAAGU 5'  
query=miR5227, target=R03G\_05552, score=3.5, range=99-120, strand  
target 5' UUCAUCGUCUUCUUCUUCUUCA 3'  
:: .. .....  
query 3' UAGGAGUUGAAGAAGAAGAAGU 5'  
query=miR5227, target=R03G\_07254, score=3.5, range=1494-1515,  
strand=-1  
target 5' CUCUUCUUCUUCUUCUUCUUCA 3'  
:::: .....  
query 3' UAGGAGUUGAAGAAGAAGAAGU 5'  
query=miR5227, target=R03G\_07634, score=3.5, range=1629-1650,  
strand=-1  
target 5' UUCUUCUUCUUCUUCUUCUUCA 3'  
:::: .....  
query 3' UAGGAGUUGAAGAAGAAGAAGU 5'  
query=miR5227, target=R03G\_00658, score=3.5, range=1200-1221,  
strand=-1  
target 5' UUCUUCUUCUUCUUCUUCUUCG 3'



:::: ::::::::::::::  
query 3' UAGGAGUUGAAGAAGAAGAAGU 5'  
query=miR5227, target=R03G\_12990, score=3.5, range=534-555, stran  
target 5' UUCUUCUUCUUCUUCUUCUUCA 3'  
:::: ::::::::::::::  
query 3' UAGGAGUUGAAGAAGAAGAAGU 5'  
query=miR5227, target=R03G\_06058, score=3.5, range=372-393, stran  
target 5' UUCUUCUUCUUCUUCUUCUUCA 3'  
:::: ::::::::::::::  
query 3' UAGGAGUUGAAGAAGAAGAAGU 5'  
query=miR5227, target=R03G\_03973, score=3.5, range=567-588, stran  
target 5' AUCCGCACUUCUUCUUCUUC 3'  
:::: ::::::::::::::  
query 3' UAGGAGUUGAAGAAGAAGAAGU 5'  
query=miR5227, target=R03G\_14740, score=3.5, range=777-798, stran  
target 5' UUCUUCUUCUUCUUCUUCUUCA 3'  
:::: ::::::::::::::  
query 3' UAGGAGUUGAAGAAGAAGAAGU 5'  
query=miR5227, target=R03G\_00906, score=3.5, range=363-384, stran  
target 5' UUCUUCUUCUUCUUCUUCUUCA 3'  
:::: ::::::::::::::  
query 3' UAGGAGUUGAAGAAGAAGAAGU 5'  
query=miR5227, target=R03G\_15854, score=3.5, range=669-690, stran  
target 5' AUCUUCUUCUUCUUCUUCUUCU 3'  
:::: ::::::::::::::  
query 3' UAGGAGUUGAAGAAGAAGAAGU 5'  
query=miR5227, target=R03G\_05540, score=3.5, range=180-201, stran  
target 5' UUCUUCUUCUUCUUCUUCUUCA 3'  
:::: ::::::::::::::  
query 3' UAGGAGUUGAAGAAGAAGAAGU 5'  
query=miR5227, target=R03G\_09134, score=3.5, range=555-576, stran  
target 5' UUCUUCUUCUUCUUCUUCUUCA 3'  
:::: ::::::::::::::  
query 3' UAGGAGUUGAAGAAGAAGAAGU 5'  
query=miR5227, target=R03G\_14175, score=3.5, range=135-156, stran  
target 5' CUCUUCUUCUUCUUCUUCUUCA 3'  
:::: ::::::::::::::  
query 3' UAGGAGUUGAAGAAGAAGAAGU 5'  
query=miR5227, target=R03G\_02089, score=3.5, range=315-336, stran  
target 5' GGCGUCAACUUCUUCUUCUUCU 3'  
. : ::::::::::::::  
query 3' UAGGAGUUGAAGAAGAAGAAGU 5'  
query=miR5227, target=R03G\_03760, score=3.5, range=72-93, strand=  
target 5' AAUAUCAACUUCUUCUUCUUCU 3'  
: . ::::::::::::::

```
query 3' UAGGAGUUGAAGAAGAAGAAGU 5'  
query=miR5227, target=R03G_08243, score=3.5, range=51-72, strand=  
target 5' UUCUUCUUCUUCUUCUUCUUCA 3'  
:..: :.....  
query 3' UAGGAGUUGAAGAAGAAGAAGU 5'  
query=miR5227, target=R03G_16184, score=3.5, range=3243-3265,  
strand=-1  
target 5' AUUCCAAAUUCUUCUUCUUCUUCA 3'  
:..: : :.....  
query 3' UAGGAGUU-GAAGAAGAAGAAGU 5'  
query=miR5227, target=R03G_13525, score=3.5, range=750-770, stran  
target 5' AUCUUU-UUUUCUUCUUCUUCA 3'  
:..... :.....  
query 3' UAGGAGUUGAAGAAGAAGAAGU 5'  
query=miR5227, target=R03G_09240, score=3.5, range=57-78, strand=  
target 5' ACUCUCCUCUUCUUCUUCUUCA 3'  
: .:~: :.....  
query 3' UAGGAGUUGAAGAAGAAGAAGU 5'  
query=miR5227, target=R03G_01410, score=3.5, range=306-327, stran  
target 5' GUCAUCCUCUUCUUCUUCUUCA 3'  
.~: : :.....  
query 3' UAGGAGUUGAAGAAGAAGAAGU 5'  
query=miR5227, target=R03G_13511, score=3.5, range=219-240, stran  
target 5' AUCUCCUUCUUCUUCUUCUUCA 3'  
:~: . :.....  
query 3' UAGGAGUUGAAGAAGAAGAAGU 5'  
query=miR5227, target=R03G_13239, score=3.5, range=315-336, stran  
target 5' AUCCAUUUCUUCUUCUUCUUCA 3'  
:~:~ . :.....  
query 3' UAGGAGUUGAAGAAGAAGAAGU 5'  
query=miR5227, target=R03G_12381, score=3.5, range=675-696, stran  
target 5' AUCAUCCUCUUCUUCUUCUUCG 3'  
:~:~ : :.....  
query 3' UAGGAGUUGAAGAAGAAGAAGU 5'  
query=miR5227, target=R03G_07422, score=3.5, range=321-341, stran  
target 5' GUCGUCAAC-UCUUCUUCUUCA 3'  
.~: :~:~ :.....  
query 3' UAGGAGUUGAAGAAGAAGAAGU 5'  
query=miR5227, target=R03G_04929, score=3.5, range=1083-1104,  
strand=-1  
target 5' AUCUUCUUCUUCUUCUUCUUCU 3'  
:~:~:~ :.....  
query 3' UAGGAGUUGAAGAAGAAGAAGU 5'  
query=miR5227, target=R03G_15658, score=3.5, range=441-462, stran  
target 5' UUCUUCUUCUUCUUCUUCUUCA 3'
```

.....  
query 3' UAGGAGUUGAAGAAGAAGAAGU 5'  
query=miR5227, target=R03G\_00049, score=3.5, range=252-272, stran  
target 5' AUCUUU-UCUUCUUCUUCUUCG 3'  
.....  
query 3' UAGGAGUUGAAGAAGAAGAAGU 5'  
query=miR5227, target=R03G\_03381, score=3.5, range=924-946, stran  
target 5' GUUCGUUAUCUUCUUCUUCUUCA 3'  
...: ..: .....  
query 3' UAGG-AGUUGAAGAAGAAGAAGU 5'  
query=miR5227, target=R03G\_02972, score=4, range=201-222, strand=  
target 5' UUCUUCUUCUUCUUCUUCUUCG 3'  
.....  
query 3' UAGGAGUUGAAGAAGAAGAAGU 5'  
query=miR5227, target=R03G\_00345, score=4, range=3-24, strand=1  
target 5' GACUUCUUUCUUCUUCUUCUUCA 3'  
. ....  
query 3' UAGGAGUUGAAGAAGAAGAAGU 5'  
query=miR5227, target=R03G\_14312, score=4, range=248-270, strand=  
target 5' AUCGUACUACUUCUUCUUCUUCU 3'  
... : : .....  
query 3' UAGGA-GUUGAAGAAGAAGAAGU 5'  
query=miR5227, target=R03G\_03203, score=4, range=515-537, strand=  
target 5' AUCCCGAAUCUUCUUCUUCUUCU 3'  
.....  
query 3' UAGGAGUU-GAAGAAGAAGAAGU 5'  
query=miR5227, target=R03G\_11040, score=4, range=73-93, strand=1  
target 5' AUCC-CAAGUUCAUCUUCUUCA 3'  
.....  
query 3' UAGGAGUUGAAGAAGAAGAAGU 5'  
query=miR5227, target=R03G\_13835, score=4, range=13665-13686,  
strand=-1  
target 5' CUUCUCAGCUUUUUCUUCUUUA 3'  
.....  
query 3' UAGGAGUUGAAGAAGAAGAAGU 5'  
query=miR5227, target=R03G\_10982, score=4, range=1254-1275, stran  
target 5' AUCAUUAAUUUCUUUUUCUUUA 3'  
... ..  
query 3' UAGGAGUUGAAGAAGAAGAAGU 5'  
query=miR5227, target=R03G\_09720, score=4, range=318-339, strand=  
target 5' GUCCUUGAUUUCUUCUUCUUCA 3'  
.....  
query 3' UAGGAGUUGAAGAAGAAGAAGU 5'  
query=miR5227, target=R03G\_06767, score=4, range=3225-3246, stran  
target 5' CCUUUAGCUUCUUCUUCUUCA 3'

.....  
query 3' UAGGAGUUGAAGAAGAAGAAGU 5'  
query=miR5227, target=R03G\_07999, score=4, range=969-990, strand=  
target 5' AUCUUCAGCUUCUUCUUCUUCU 3'  
..... ::  
query 3' UAGGAGUUGAAGAAGAAGAAGU 5'  
query=miR5227, target=R03G\_08632, score=4, range=558-579, strand=  
target 5' AUCCUCAACUUCUUCUCAUCA 3'  
..... :: ::  
query 3' UAGGAGUUGAAGAAGAAGAAGU 5'  
query=miR5227, target=R03G\_14961, score=4, range=3449-3470, stran  
target 5' AUACUCAACAUCUUCUUCUUUA 3'  
:: ::::: ::::: :::::  
query 3' UAGGAGUUGAAGAAGAAGAAGU 5'  
query=miR5227, target=R03G\_00993, score=4, range=612-633, strand=  
target 5' AUCCUCAUCGUUUUCUUCUUCA 3'  
::::: : ::::: :::::  
query 3' UAGGAGUUGAAGAAGAAGAAGU 5'  
query=miR5227, target=R03G\_13237, score=4, range=189-210, strand=  
target 5' GUCCUCGUCUUCUUCUUCUUCA 3'  
.::::. ::::: :::::  
query 3' UAGGAGUUGAAGAAGAAGAAGU 5'  
query=miR5227, target=R03G\_14289, score=4, range=618-639, strand=  
target 5' AUCGUCAUCUUUUUCUUCUUUA 3'  
::: ::: ::::: :::::  
query 3' UAGGAGUUGAAGAAGAAGAAGU 5'  
query=miR5227, target=R03G\_07647, score=4, range=150-171, strand=  
target 5' AUUUUGAACUUCUUCUUCUCCA 3'  
::::: ::::: ::::: :::  
query 3' UAGGAGUUGAAGAAGAAGAAGU 5'  
query=miR5227, target=R03G\_11504, score=4, range=270-291, strand=  
target 5' AGCUUCAGCAUCUUCUUCUUCA 3'  
: ::::: ::::: :::::  
query 3' UAGGAGUUGAAGAAGAAGAAGU 5'  
query=miR5227, target=R03G\_04929, score=4, range=441-462, strand=  
target 5' AUCUUCUUUUUCUUCUUCUUUA 3'  
::::: ::::: ::::: :::  
query 3' UAGGAGUUGAAGAAGAAGAAGU 5'  
query=miR5227, target=R03G\_04852, score=4, range=870-891, strand=  
target 5' AUCUACAGAUUCUUCUUUUUCA 3'  
::: ::: ::::: :::::  
query 3' UAGGAGUUGAAGAAGAAGAAGU 5'  
query=miR5227, target=R03G\_03409, score=4, range=414-435, strand=  
target 5' AUCUUUCUCUUUUUCUUCUUCA 3'  
::::. ::::: ::::: :::::

```
query 3' UAGGAGUUGAAGAAGAAGAAGU 5'
query=miR5227, target=R03G_02335, score=4, range=906-928, strand=
target 5' AUCUUUCAUUUUUCUUCUUUUUCA 3'
::: .::: .:::
query 3' UAG-GAGUUGAAGAAGAAGAAGU 5'
query=miR5227, target=R03G_17101, score=4, range=665-686, strand=
target 5' UUCCAUAUUUCUUCUUCUUCU 3'
::: .:::
query 3' UAGGAGUUGAAGAAGAAGAAGU 5'
query=miR5227, target=R03G_10461, score=4, range=620-641, strand=
target 5' UUCCAUAGCUUCUUCUUCUUCU 3'
::: .:::
query 3' UAGGAGUUGAAGAAGAAGAAGU 5'
query=miR5227, target=R03G_16965, score=4, range=2358-2379, stran
target 5' AUCCUCAUCUUCUUCUUCAUCC 3'
::: .:::
query 3' UAGGAGUUGAAGAAGAAGAAGU 5'
query=miR5227, target=R03G_16470, score=4, range=426-448, strand=
target 5' GUUGUUCGUCUUCUUCUUCUUCA 3'
... .:::
query 3' UAG-GAGUUGAAGAAGAAGAAGU 5'
query=miR5227, target=R03G_14853, score=4, range=246-267, strand=
target 5' UUCUUCGUCUUCUUCUUCUUC 3'
::: .:::
query 3' UAGGAGUUGAAGAAGAAGAAGU 5'
query=miR5227, target=R03G_04484, score=4, range=84-105, strand=-
target 5' UUCCUCAUCUUCUUCUUCUUCA 3'
::: .:::
query 3' UAGGAGUUGAAGAAGAAGAAGU 5'
query=miR5227, target=R03G_07020, score=4, range=735-756, strand=
target 5' AUCCUCAUCUUCUUCAUCUUCU 3'
::: .:::
query 3' UAGGAGUUGAAGAAGAAGAAGU 5'
query=miR5227, target=R03G_15353, score=4, range=657-678, strand=
target 5' CUCCUCAUCCUCUUCUUCUUCA 3'
::: .:::
query 3' UAGGAGUUGAAGAAGAAGAAGU 5'
query=miR5227, target=R03G_13505, score=4, range=381-402, strand=
target 5' UUCUUCUUCUUCUUCUUCUUCG 3'
::: .:::
query 3' UAGGAGUUGAAGAAGAAGAAGU 5'
query=miR5227, target=R03G_12517, score=4, range=27-48, strand=-1
target 5' UUCCUCAAGCUCUUCUUCUUCA 3'
::: .:::
query 3' UAGGAGUUGAAGAAGAAGAAGU 5'
```

query=miR5227, target=R03G\_01798, score=4, range=207-228, strand=  
target 5' ACUCUCGCCUUCUUCUUCUUCU 3'  
: .:::: :  
query 3' UAGGAGUUGAAGAAGAAGAAGU 5'  
query=miR5227, target=R03G\_14420, score=4, range=1773-1794, stran  
target 5' UUCUUCUUCUUCUUCUUCUUCG 3'  
:::: :  
query 3' UAGGAGUUGAAGAAGAAGAAGU 5'  
query=miR5227, target=R03G\_13513, score=4, range=1503-1524, stran  
target 5' UUCUUCUUCUUCUUCUUCUUCG 3'  
:::: :  
query 3' UAGGAGUUGAAGAAGAAGAAGU 5'  
query=miR5227, target=R03G\_00845, score=4, range=1437-1458, stran  
target 5' GCCUCCACUUCUUCUUCUUC 3'  
. :::: :  
query 3' UAGGAGUUGAAGAAGAAGAAGU 5'  
query=miR5227, target=R03G\_08989, score=4, range=1746-1767, stran  
target 5' AAUUUCACCUUCUUCUUCUUCU 3'  
: .:::: :  
query 3' UAGGAGUUGAAGAAGAAGAAGU 5'  
query=miR5227, target=R03G\_12945, score=4, range=72-93, strand=-1  
target 5' UUCUUCUUCUUCUUCUUCUUCG 3'  
:::: :  
query 3' UAGGAGUUGAAGAAGAAGAAGU 5'  
query=miR5227, target=R03G\_02556, score=4, range=3054-3075, stran  
target 5' AUCAUCAAAUUCUUCUUCUCA 3'  
::: :::: :  
query 3' UAGGAGUUGAAGAAGAAGAAGU 5'  
query=miR5227, target=R03G\_03969, score=4, range=600-621, strand=  
target 5' AUCCGCGCUUCUUCUUCUUC 3'  
:::: :. .:::: :  
query 3' UAGGAGUUGAAGAAGAAGAAGU 5'  
query=miR5227, target=R03G\_10712, score=4, range=1143-1164, stran  
target 5' UUCUUCUUCUUCUUCUUCUUCG 3'  
:::: :  
query 3' UAGGAGUUGAAGAAGAAGAAGU 5'  
query=miR5227, target=R03G\_00049, score=4, range=174-195, strand=  
target 5' CUUUUCUUCUUCUUCUUCUCA 3'  
:::: :  
query 3' UAGGAGUUGAAGAAGAAGAAGU 5'  
query=miR5227, target=R03G\_03544, score=4, range=735-756, strand=  
target 5' UUCUUCUUCUUCUUCUUCUUCG 3'  
:::: :  
query 3' UAGGAGUUGAAGAAGAAGAAGU 5'  
query=miR5227, target=R03G\_09400, score=4, range=612-633, strand=

```
target 5' UUCUUUUUCUUCUUCUUCUUCA 3'
.....
query 3' UAGGAGUUGAAGAAGAAGAAGU 5'
query=miR5227, target=R03G_11643, score=4, range=402-423, strand=
target 5' CUCUUCUUCUUCUUCUUCUUCG 3'
.....
query 3' UAGGAGUUGAAGAAGAAGAAGU 5'
query=miR5227, target=R03G_10079, score=4, range=720-741, strand=
target 5' GUCUUCUUCUUCUUCUUCUUCU 3'
.....
query 3' UAGGAGUUGAAGAAGAAGAAGU 5'
query=miR5227, target=R03G_16926, score=4, range=387-408, strand=
target 5' AUCUCUCACUUCUUCUUCUUCU 3'
.... .
query 3' UAGGAGUUGAAGAAGAAGAAGU 5'
query=miR5227, target=R03G_04817, score=4, range=2955-2976, stran
target 5' AAUACAAUUUCUUCUUCUUCA 3'
: .
query 3' UAGGAGUUGAAGAAGAAGAAGU 5'
query=miR5227, target=R03G_01413, score=4, range=363-384, strand=
target 5' AUCUUCUGAUUCUUCUUCUUC 3'
.....
query 3' UAGGAGUUGAAGAAGAAGAAGU 5'
query=miR5227, target=R03G_11230, score=4, range=2004-2025, stran
target 5' AUCAACAACUUCUUCUUCAUCA 3'
...
query 3' UAGGAGUUGAAGAAGAAGAAGU 5'
query=miR5227, target=R03G_04278, score=4, range=1923-1945, stran
target 5' AUACCUCAUCAUCUUCUUCUUCA 3'
..
query 3' UA-GGAGUUGAAGAAGAAGAAGU 5'
query=miR5227, target=R03G_10002, score=4, range=180-200, strand=
target 5' AUCUCUAACUU-UUCUUCUUCA 3'
....
query 3' UAGGAGUUGAAGAAGAAGAAGU 5'
query=miR5227, target=R03G_12131, score=4, range=1437-1458, stran
target 5' AUCAUCAUCCUCUUCUUCUUCA 3'
...
query 3' UAGGAGUUGAAGAAGAAGAAGU 5'
query=miR5227, target=R03G_03957, score=4, range=1284-1305, stran
target 5' AUCAUCAUCCUCUUCUUCUUCA 3'
...
query 3' UAGGAGUUGAAGAAGAAGAAGU 5'
query=miR5227, target=R03G_15686, score=4, range=720-741, strand=
target 5' AUCAUCAUCUUCUUCUUCAUCA 3'
```

::: :: : : : : : : : : : : : : :  
query 3' UAGGAGUUGAAGAAGAAGAAGU 5'  
query=miR5227, target=R03G\_11890, score=4, range=111-132, strand=  
target 5' AUCUUUUAAUUCUUCUUCUUC 3'  
 : : : : : : : : : : : : : : : : : : :  
query 3' UAGGAGUUGAAGAAGAAGAAGU 5'  
query=miR5227, target=R03G\_13255, score=4, range=195-217, strand=  
target 5' CUCCUUGUUCUUCUUCUUCUUCA 3'  
 : : : : : : : : : : : : : : : : : : :  
query 3' UAGGAGU-UGAAGAAGAAGAAGU 5'  
query=miR5227, target=R03G\_02114, score=4, range=459-480, strand=  
target 5' AUCAUCAUCUUCUUCUUCUCA 3'  
 : : : : : : : : : : : : : : : : : : :  
query 3' UAGGAGUUGAAGAAGAAGAAGU 5'  
query=miR5227, target=R03G\_01368, score=4, range=633-654, strand=  
target 5' CUCAUCAAAUUCUUCUUCUUC 3'  
 : : : : : : : : : : : : : : : : : : :  
query 3' UAGGAGUUGAAGAAGAAGAAGU 5'  
query=miR5227, target=R03G\_06704, score=4, range=171-192, strand=  
target 5' AUCAUCAUCGUCUUCUUCUUCA 3'  
 : : : : : : : : : : : : : : : : : : :  
query 3' UAGGAGUUGAAGAAGAAGAAGU 5'  
query=miR5227, target=R03G\_09755, score=4, range=2232-2253, stran  
target 5' UUCCUCUUCUUCUUCUUCUUCU 3'  
 : : : : : : : : : : : : : : : : : : :  
query 3' UAGGAGUUGAAGAAGAAGAAGU 5'  
query=miR5227, target=R03G\_16240, score=4, range=390-411, strand=  
target 5' AUCGUCACCUUCUUCUUCAUCA 3'  
 : : : : : : : : : : : : : : : : : : :  
query 3' UAGGAGUUGAAGAAGAAGAAGU 5'  
query=miR5227, target=R03G\_02991, score=4, range=135-156, strand=  
target 5' UUCCUCUUCUUCUUCUUCUUC 3'  
 : : : : : : : : : : : : : : : : : : :  
query 3' UAGGAGUUGAAGAAGAAGAAGU 5'  
query=miR5227, target=R03G\_05313, score=4, range=1230-1251, stran  
target 5' UUCCUCUUCUUCUUCUUCUUCU 3'  
 : : : : : : : : : : : : : : : : : : :  
query 3' UAGGAGUUGAAGAAGAAGAAGU 5'  
query=miR5227, target=R03G\_02243, score=4, range=363-384, strand=  
target 5' UUCCUCCUCUUCUUCUUCUUC 3'  
 : : : : : : : : : : : : : : : : : : :  
query 3' UAGGAGUUGAAGAAGAAGAAGU 5'  
query=miR5227, target=R03G\_12267, score=4, range=396-417, strand=  
target 5' AUUUUCUUGUUCUUCUUCUUCA 3'  
 : : : : : : : : : : : : : : : : : : :  
 : : : : : : : : : : : : : : : : : : :



query 3' UAGGAGUUGAAGAAGAAGAAGU 5'  
query=miR5227, target=R03G\_07091, score=4, range=357-378, strand=  
target 5' CUCCUCCUCUUCUUCUUCUUC 3'  
.....  
query 3' UAGGAGUUGAAGAAGAAGAAGU 5'  
query=miR5227, target=R03G\_01019, score=4, range=72-93, strand=-1  
target 5' CUCCUCCUCUUCUUCUUCUUC 3'  
.....  
query 3' UAGGAGUUGAAGAAGAAGAAGU 5'  
query=miR5227, target=R03G\_13923, score=4, range=105-126, strand=  
target 5' UUCUUCUUCUUCUUCUUCUUC 3'  
.....  
query 3' UAGGAGUUGAAGAAGAAGAAGU 5'  
query=miR5227, target=R03G\_14653, score=4, range=318-339, strand=  
target 5' AUCUCUUCUUCUUCUUCUUCU 3'  
.... .  
query 3' UAGGAGUUGAAGAAGAAGAAGU 5'  
query=miR5227, target=R03G\_11915, score=4, range=804-826, strand=  
target 5' GUCUUUCUAAUUCUUCUUCUUC 3'  
... ..  
query 3' UAG-GAGUUGAAGAAGAAGAAGU 5'  
query=miR5227, target=R03G\_08247, score=4, range=678-700, strand=  
target 5' GUACUAGUACUUCUUCUUCUUC 3'  
.. :  
query 3' UAGGAGU-UGAAGAAGAAGAAGU 5'  
query=miR5227, target=R03G\_13436, score=4, range=105-126, strand=  
target 5' UUCUUCUUCUUCUUCUUCUUC 3'  
.....  
query 3' UAGGAGUUGAAGAAGAAGAAGU 5'  
query=miR5227, target=R03G\_04530, score=4, range=147-168, strand=  
target 5' CACAUCAUCUUCUUCUUCUUC 3'  
: :  
query 3' UAGGAGUUGAAGAAGAAGAAGU 5'  
query=miR5227, target=R03G\_15929, score=4, range=56-78, strand=-1  
target 5' AUUCAUUAUAUUCUUCUUCUUC 3'  
... :  
query 3' UAGG-AGUUGAAGAAGAAGAAGU 5'  
query=miR5227, target=R03G\_01696, score=4, range=753-774, strand=  
target 5' UUCUUUUUCUUCUUCUUCUUC 3'  
.....  
query 3' UAGGAGUUGAAGAAGAAGAAGU 5'  
query=miR5227, target=R03G\_10492, score=4, range=129-150, strand=  
target 5' AUCCUGCUCUUCUUCUUCUUC 3'  
.....  
query 3' UAGGAGUUGAAGAAGAAGAAGU 5'



```
target 5' ACACACCAUCAACUGAAGGGC 3'
::: :::::::::::::::::::::
query 3' UGU-UGGUAGUUGACUUCUCU 5'
query=miR2644, target=R03G_10744, score=3.5, range=360-378, stran
target 5' GCUAUC-UCAACUGAAGAGG 3'
.: :.: :::::::::::::::::::::
query 3' UGUUGGUAGUUGACUUCUCU 5'
query=miR2644, target=R03G_16366, score=3.5, range=360-378, stran
target 5' GCUAUC-UCAACUGAAGAGG 3'
.: :.: :::::::::::::::::::::
query 3' UGUUGGUAGUUGACUUCUCU 5'
query=miR2644, target=R03G_13448, score=3.5, range=360-378, stran
target 5' GCUAUC-UCAACUGAAGAGG 3'
.: :.: :::::::::::::::::::::
query 3' UGUUGGUAGUUGACUUCUCU 5'
query=miR2644, target=R03G_17253, score=3.5, range=360-378, stran
target 5' GCUAUC-UCAACUGAAGAGG 3'
.: :.: :::::::::::::::::::::
query 3' UGUUGGUAGUUGACUUCUCU 5'
query=miR2644, target=R03G_17200, score=3.5, range=474-492, stran
target 5' GCUAUC-UCAACUGAAGAGG 3'
.: :.: :::::::::::::::::::::
query 3' UGUUGGUAGUUGACUUCUCU 5'
query=miR2644, target=R03G_00074, score=4, range=456-475, strand=
target 5' ACAACAAUUAACUGUAGAGA 3'
::::: :::::::::::::::::::::
query 3' UGUUGGUAGUUGACUUCUCU 5'
query=miR2644, target=R03G_01826, score=4, range=165-184, strand=
target 5' ACCUUUAUCAAUUGAAGAGA 3'
:: ..:::::::::::::::::::
query 3' UGUUGGUAGUUGACUUCUCU 5'
query=miR2644, target=R03G_06628, score=4, range=242-262, strand=
target 5' AUAUAAAUCAACUGAAGAGC 3'
:.... :::::::::::::::::::::
query 3' UGUUG-GUAGUUGACUUCUCU 5'
query=miR1028a-3p, target=R03G_12393, score=1.5, range=435-453,
strand=-1
target 5' AGCUACAUCUACAGUGUCA 3'
:::::::::::::::::::
query 3' UUGAUGUAGAUGUUACAGU 5'
query=miR1028a-3p, target=R03G_06288, score=2.5, range=25-43, str
target 5' GACUGUGUCUACAAUGUCA 3'
.....:::::::::::::::::::
query 3' UUGAUGUAGAUGUUACAGU 5'
query=miR1028a-3p, target=R03G_09309, score=2.5, range=70-88, str
```

target 5' AGCUACAUCAACAAUGUCA 3'  
:..... :.....  
query 3' UUGAUGUAGAUGUUACAGU 5'  
query=miR1028a-3p, target=R03G\_10411, score=2.5, range=5271-5289,  
strand=-1  
target 5' AAUUACAUCUGCAAUGUUA 3'  
:..... :.....  
query 3' UUGAUGUAGAUGUUACAGU 5'  
query=miR1028a-3p, target=R03G\_16774, score=3, range=348-366,  
strand=-1  
target 5' AGCCAUGUCUACAAUGUCA 3'  
:.: :..... :.....  
query 3' UUGAUGUAGAUGUUACAGU 5'  
query=miR1028a-3p, target=R03G\_09670, score=3.5, range=99-118,  
strand=1  
target 5' CAUUAUCAUUUACAAUGUCA 3'  
:..: :..... :.....  
query 3' UUGAU-GUAGAUGUUACAGU 5'  
query=miR1028a-3p, target=R03G\_07365, score=3.5, range=338-355,  
strand=1  
target 5' AGCUCCAUCUACAAU-UCA 3'  
:..: :..... :.....  
query 3' UUGAUGUAGAUGUUACAGU 5'  
query=miR1028a-3p, target=R03G\_04625, score=3.5, range=330-348,  
strand=-1  
target 5' GGUAACAUCUGCAAUGUCA 3'  
... :..... :.....  
query 3' UUGAUGUAGAUGUUACAGU 5'  
query=miR1028a-3p, target=R03G\_16225, score=3.5, range=27-45,  
strand=-1  
target 5' AAUUUCAUCUACAAUUUCA 3'  
:..: :..... :.....  
query 3' UUGAUGUAGAUGUUACAGU 5'  
query=miR1028a-3p, target=R03G\_10981, score=3.5, range=534-551,  
strand=-1  
target 5' AAUU-CAUCUAUAAUGUCU 3'  
:..: :..... :.....  
query 3' UUGAUGUAGAUGUUACAGU 5'  
query=miR1028a-3p, target=R03G\_05471, score=3.5, range=333-351,  
strand=-1  
target 5' CACUUGAUCUACAAUGUCG 3'  
:..: :..... :.....  
query 3' UUGAUGUAGAUGUUACAGU 5'  
query=miR1028a-3p, target=R03G\_16994, score=4, range=471-489, str  
target 5' AACUACAUCUACACUGACA 3'

```
::::::::::: :: ::
query 3' UUGAUGUAGAUGUUACAGU 5'
query=miR1028a-3p, target=R03G_07870, score=4, range=1032-1050,
strand=1
target 5' AACACAUUUACAAGGUCA 3'
::: ::::::::::::: ::::
query 3' UUGAUGUAGAUGUUACAGU 5'
query=miR1028a-3p, target=R03G_11701, score=4, range=1865-1882,
strand=1
target 5' GACU-CAUUUACAGUGUCG 3'
.:::: :::::::::::::
query 3' UUGAUGUAGAUGUUACAGU 5'
query=miR1028a-3p, target=R03G_15867, score=4, range=1032-1050,
strand=1
target 5' AACACAUUUACAAGGUCA 3'
::: ::::::::::::: ::::
query 3' UUGAUGUAGAUGUUACAGU 5'
query=miR1028a-3p, target=R03G_11205, score=4, range=1744-1762,
strand=1
target 5' AAAUACAUCUAUUAUGUCA 3'
:: ::::::::::::: ::::::
query 3' UUGAUGUAGAUGUUACAGU 5'
query=miR1028a-3p, target=R03G_05417, score=4, range=384-402, str
target 5' AACACAUUUACAAGGUCA 3'
::: ::::::::::::: ::::
query 3' UUGAUGUAGAUGUUACAGU 5'
query=miR1028a-3p, target=R03G_03157, score=4, range=4066-4084,
strand=1
target 5' AGCAAUAUCUACAAGGUCA 3'
:.. ::::::::::::: ::::
query 3' UUGAUGUAGAUGUUACAGU 5'
query=miR1028a-3p, target=R03G_07623, score=4, range=367-385, str
target 5' AAUUUUAUCUCCAAUGUCA 3'
:..: .::::: ::::::::::::
query 3' UUGAUGUAGAUGUUACAGU 5'
query=miR1028a-3p, target=R03G_12933, score=4, range=1213-1231,
strand=1
target 5' UACCACAUCUACAAUGUAA 3'
:: ::::::::::::: :
query 3' UUGAUGUAGAUGUUACAGU 5'
query=miR1028a-3p, target=R03G_04703, score=4, range=104-122, str
target 5' CACAUCAUUUACAAUGUCA 3'
:: :::::::::::::
query 3' UUGAUGUAGAUGUUACAGU 5'
query=miR1028a-3p, target=R03G_08194, score=4, range=759-777, str
```

```

target 5' ACCAACACCUACAAUGUCA 3'
: : ::: : : : : : : : : :
query 3' UUGAUGUAGAUGUUACAGU 5'
query=miR1028a-3p, target=R03G_02763, score=4, range=164-181, str
target 5' AAAUA-AACUACAAUGUCA 3'
:: : : : : : : : : :
query 3' UUGAUGUAGAUGUUACAGU 5'
query=miR1028a-3p, target=R03G_06637, score=4, range=1341-1359,
strand=-1
target 5' GACUAUGUCUACAAUUUCA 3'
.: : : : : : : : : :
query 3' UUGAUGUAGAUGUUACAGU 5'
query=miR1028a-3p, target=R03G_09358, score=4, range=105-123,
strand=-1
target 5' AGUUACAUUUACAACGUCA 3'
:..: : : : : : : : : :
query 3' UUGAUGUAGAUGUUACAGU 5'
query=miR1028a-3p, target=R03G_14577, score=4, range=2232-2250,
strand=-1
target 5' AACAGCAUCUAUAAUGUUG 3'
::: .: : : : : : : : :
query 3' UUGAUGUAGAUGUUACAGU 5'
query=miR1028a-3p, target=R03G_07414, score=4, range=1374-1392,
strand=-1
target 5' AACACAUGUGCAAUGUCA 3'
::: : : : : : : : : :
query 3' UUGAUGUAGAUGUUACAGU 5'
query=miR1028a-3p, target=R03G_15747, score=4, range=2-20, strand
target 5' AACUUCAUCUUUAAUGUCA 3'
: : : : : : : : : :
query 3' UUGAUGUAGAUGUUACAGU 5'
query=miR1028a-3p, target=R03G_10852, score=4, range=4311-4329,
strand=-1
target 5' GGCUUCAUCUACAAUGACA 3'
.: : : : : : : : : :
query 3' UUGAUGUAGAUGUUACAGU 5'
query=miR1028a-3p, target=R03G_12345, score=4, range=4095-4113,
strand=-1
target 5' AGUUUCAUCUAGAAUGUCA 3'
:..: : : : : : : : : :
query 3' UUGAUGUAGAUGUUACAGU 5'
query=miR1028a-3p, target=R03G_06931, score=4, range=2370-2388,
strand=-1
target 5' GGCAACAUCAACAAUGUCA 3'
.: : : : : : : : : :

```

query 3' UUGAUGUAGAUGUUACAGU 5'  
query=miR1028a-3p, target=R03G\_08401, score=4, range=123-140,  
strand=-1  
target 5' AGUU-CAUUUACAAUGUCC 3'  
...: :::::::::::::::  
query 3' UUGAUGUAGAUGUUACAGU 5'  
query=miR1028a-3p, target=R03G\_00368, score=4, range=486-503,  
strand=-1  
target 5' GAUU-CAUCUAGAAUGUCA 3'  
...: ::::::: :::::::  
query 3' UUGAUGUAGAUGUUACAGU 5'  
query=miR1028a-3p, target=R03G\_02893, score=4, range=150-168,  
strand=-1  
target 5' AUCUUCUUCUACAAUGUCA 3'  
: :: : :::::::::::::::  
query 3' UUGAUGUAGAUGUUACAGU 5'  
query=miR1028a-3p, target=R03G\_04819, score=4, range=2195-2213,  
strand=-1  
target 5' AACCAGAUCUUCAAUGUCA 3'  
::: : ::::: :::::::  
query 3' UUGAUGUAGAUGUUACAGU 5'  
query=miR1028a-3p, target=R03G\_17125, score=4, range=722-739,  
strand=-1  
target 5' UACUA-AUCAACAAUGUCA 3'  
::::: ::: :::::::  
query 3' UUGAUGUAGAUGUUACAGU 5'  
query=miR863-5p, target=R03G\_14622, score=0, range=2022-2042,  
strand=-1  
target 5' AUGAUUAACAACAAGCCAUAA 3'  
:::::::::::::::::::::  
query 3' UACUAUAUGUUGUUCGGUAUU 5'  
query=miR863-5p, target=R03G\_14810, score=2.5, range=488-508, str  
target 5' AUGGAAUACAACAAGUCAUAA 3'  
:::. :::::::::::::::  
query 3' UACUAUAUGUUGUUCGGUAUU 5'  
query=miR863-5p, target=R03G\_07492, score=3.5, range=116-135,  
strand=-1  
target 5' AAGAU-UGCGACAAGCCAUAA 3'  
: ::: :::::::::::::::  
query 3' UACUAUAUGUUGUUCGGUAUU 5'  
query=miR863-5p, target=R03G\_14232, score=4, range=167-187, stran  
target 5' UUGCUCACAACAAGCCAUAC 3'  
:: :: :::::::::::::::  
query 3' UACUAUAUGUUGUUCGGUAUU 5'  
query=miR863-5p, target=R03G\_11909, score=4, range=12-31, strand=

target 5' AUG-UUUCCAACAAGCCAUAAC 3'  
::: : : :::::::::::::::  
query 3' UACUAUAUGUUGUUCGGUAUU 5'  
query=miR863-5p, target=R03G\_13469, score=4, range=39-59, strand=  
target 5' AUCACAAACAACAAGCCAUGA 3'  
:: : : :::::::::::::::  
query 3' UACUAUAUGUUGUUCGGUAUU 5'  
query=miR863-5p, target=R03G\_08590, score=4, range=422-443, stran  
target 5' ACGAUUAACAACAUGGCCAUAA 3'  
: : :::::::::::::: . :::::::::::  
query 3' UACUAUAUGUUGU-UCGGUAUU 5'  
query=miR416, target=R03G\_04690, score=0, range=90-111, strand=-1  
target 5' CUGAACAGUGGUACGACUAACA 3'  
: :::::::::::::::  
query 3' GACUUGUCACCAUGCUGAUUGU 5'  
query=miR416, target=R03G\_05431, score=0, range=90-111, strand=-1  
target 5' CUGAACAGUGGUACGACUAACA 3'  
: :::::::::::::::  
query 3' GACUUGUCACCAUGCUGAUUGU 5'  
query=miR416, target=R03G\_02822, score=0, range=90-111, strand=-1  
target 5' CUGAACAGUGGUACGACUAACA 3'  
: :::::::::::::::  
query 3' GACUUGUCACCAUGCUGAUUGU 5'  
query=miR416, target=R03G\_15141, score=0, range=90-111, strand=-1  
target 5' CUGAACAGUGGUACGACUAACA 3'  
: :::::::::::::::  
query 3' GACUUGUCACCAUGCUGAUUGU 5'  
query=miR416, target=R03G\_09168, score=0, range=90-111, strand=-1  
target 5' CUGAACAGUGGUACGACUAACA 3'  
: :::::::::::::::  
query 3' GACUUGUCACCAUGCUGAUUGU 5'  
query=miR416, target=R03G\_04787, score=0, range=90-111, strand=-1  
target 5' CUGAACAGUGGUACGACUAACA 3'  
: :::::::::::::::  
query 3' GACUUGUCACCAUGCUGAUUGU 5'  
query=miR416, target=R03G\_00304, score=1, range=90-111, strand=-1  
target 5' CUGAACAGUGGUACGACUAAUA 3'  
: :::::::::::::::  
query 3' GACUUGUCACCAUGCUGAUUGU 5'  
query=miR416, target=R03G\_12954, score=1, range=90-111, strand=-1  
target 5' CUGGACAGUGGUACGACUAACG 3'  
: :::::::::::::::  
query 3' GACUUGUCACCAUGCUGAUUGU 5'  
query=miR416, target=R03G\_10770, score=1, range=90-111, strand=-1  
target 5' CUGGACAGUGGUACGACUAACG 3'



```
.....
query 3' GACUUGUCACCAUGCUGAUUGU 5'
query=miR416, target=R03G_10762, score=1, range=90-111, strand=-1
target 5' CUGGACAGUGGUACGACUAACG 3'
.....
query 3' GACUUGUCACCAUGCUGAUUGU 5'
query=miR1122, target=R03G_05937, score=0, range=519-538, strand=
target 5' UCCAAAUGCCGAUGAUUAUCA 3'
.....
query 3' AGGUUUACGGCUACUAUAGU 5'
query=miR1122, target=R03G_10867, score=0, range=261-280, strand=
target 5' UCCAAAUGCCGAUGAUUAUCA 3'
.....
query 3' AGGUUUACGGCUACUAUAGU 5'
query=miR1122, target=R03G_05597, score=3, range=1521-1540, stran
target 5' UACGAGCGCCGAUGAUUAUCA 3'
: :.. :.....
query 3' AGGUUUACGGCUACUAUAGU 5'
query=miR1122, target=R03G_14134, score=3.5, range=150-169, stran
target 5' UCUAAAUACCGAUGGUAUCA 3'
: :.. :.....
query 3' AGGUUUACGGCUACUAUAGU 5'
query=miR1122, target=R03G_08754, score=3.5, range=4267-4285, str
target 5' UUCAAGGCCGAUG-UAUCA 3'
: :.. :.....
query 3' AGGUUUACGGCUACUAUAGU 5'
query=miR1122, target=R03G_10357, score=3.5, range=117-136, stran
target 5' UGCGUAUGCCGAUGAUUAUCU 3'
: :. :.....
query 3' AGGUUUACGGCUACUAUAGU 5'
query=miR1122, target=R03G_09310, score=4, range=345-364, strand=
target 5' UCCGAUGCUGAUGAUUAUCU 3'
: :. :.....
query 3' AGGUUUACGGCUACUAUAGU 5'
query=miR1122, target=R03G_02783, score=4, range=1881-1900, stran
target 5' UUUUAAUGCAGAUGAUUAUCA 3'
: :. :.....
query 3' AGGUUUACGGCUACUAUAGU 5'
query=miR1122, target=R03G_05252, score=4, range=1158-1177, stran
target 5' ACCACAUGCAGAUGAUUAUCA 3'
: :. :.....
query 3' AGGUUUACGGCUACUAUAGU 5'
query=miR1122, target=R03G_12366, score=4, range=2278-2296, stran
target 5' UACAAA-GCUGAUGAUUAUA 3'
: :.. :.....
```





query 3' AGAAGACGCGGUGAAGAAGUAGU 5'  
query=miR5293, target=R03G\_14347, score=0, range=2920-2942, stran  
target 5' UCUUCUGCGCCACUUCUUCAUCA 3'  
.....  
query 3' AGAAGACGCGGUGAAGAAGUAGU 5'  
query=miR5293, target=R03G\_16539, score=0, range=2881-2903, stran  
target 5' UCUUCUGCGCCACUUCUUCAUCA 3'  
.....  
query 3' AGAAGACGCGGUGAAGAAGUAGU 5'  
query=miR5293, target=R03G\_12538, score=0, range=2881-2903, stran  
target 5' UCUUCUGCGCCACUUCUUCAUCA 3'  
.....  
query 3' AGAAGACGCGGUGAAGAAGUAGU 5'  
query=miR5293, target=R03G\_10804, score=0, range=2830-2852, stran  
target 5' UCUUCUGCGCCACUUCUUCAUCA 3'  
.....  
query 3' AGAAGACGCGGUGAAGAAGUAGU 5'  
query=miR5293, target=R03G\_07311, score=0, range=2830-2852, stran  
target 5' UCUUCUGCGCCACUUCUUCAUCA 3'  
.....  
query 3' AGAAGACGCGGUGAAGAAGUAGU 5'  
query=miR5293, target=R03G\_01614, score=0, range=2830-2852, stran  
target 5' UCUUCUGCGCCACUUCUUCAUCA 3'  
.....  
query 3' AGAAGACGCGGUGAAGAAGUAGU 5'  
query=miR5293, target=R03G\_09547, score=0, range=2824-2846, stran  
target 5' UCUUCUGCGCCACUUCUUCAUCA 3'  
.....  
query 3' AGAAGACGCGGUGAAGAAGUAGU 5'  
query=miR5293, target=R03G\_16361, score=0, range=2824-2846, stran  
target 5' UCUUCUGCGCCACUUCUUCAUCA 3'  
.....  
query 3' AGAAGACGCGGUGAAGAAGUAGU 5'  
query=miR5293, target=R03G\_06425, score=0, range=2824-2846, stran  
target 5' UCUUCUGCGCCACUUCUUCAUCA 3'  
.....  
query 3' AGAAGACGCGGUGAAGAAGUAGU 5'  
query=miR5293, target=R03G\_05330, score=0, range=2824-2846, stran  
target 5' UCUUCUGCGCCACUUCUUCAUCA 3'  
.....  
query 3' AGAAGACGCGGUGAAGAAGUAGU 5'  
query=miR5293, target=R03G\_02704, score=0, range=2824-2846, stran  
target 5' UCUUCUGCGCCACUUCUUCAUCA 3'  
.....  
query 3' AGAAGACGCGGUGAAGAAGUAGU 5'

query=miR5293, target=R03G\_12677, score=0, range=2824-2846, stran  
target 5' UCUUCUGCGCCACUUCUUCAUCA 3'  
:::::::::::::::::::::::::::  
query 3' AGAAGACGCGGUGAAGAAGUAGU 5'  
query=miR5293, target=R03G\_17021, score=0, range=2824-2846, stran  
target 5' UCUUCUGCGCCACUUCUUCAUCA 3'  
:::::::::::::::::::::::::::  
query 3' AGAAGACGCGGUGAAGAAGUAGU 5'  
query=miR5293, target=R03G\_04933, score=0, range=2824-2846, stran  
target 5' UCUUCUGCGCCACUUCUUCAUCA 3'  
:::::::::::::::::::::::::::  
query 3' AGAAGACGCGGUGAAGAAGUAGU 5'  
query=miR5293, target=R03G\_04126, score=0, range=2983-3005, stran  
target 5' UCUUCUGCGCCACUUCUUCAUCA 3'  
:::::::::::::::::::::::::::  
query 3' AGAAGACGCGGUGAAGAAGUAGU 5'  
query=miR5293, target=R03G\_05344, score=0, range=2650-2672, stran  
target 5' UCUUCUGCGCCACUUCUUCAUCA 3'  
:::::::::::::::::::::::::::  
query 3' AGAAGACGCGGUGAAGAAGUAGU 5'  
query=miR5293, target=R03G\_03778, score=0, range=2782-2804, stran  
target 5' UCUUCUGCGCCACUUCUUCAUCA 3'  
:::::::::::::::::::::::::::  
query 3' AGAAGACGCGGUGAAGAAGUAGU 5'  
query=miR5293, target=R03G\_12673, score=0, range=2125-2147, stran  
target 5' UCUUCUGCGCCACUUCUUCAUCA 3'  
:::::::::::::::::::::::::::  
query 3' AGAAGACGCGGUGAAGAAGUAGU 5'  
query=miR5293, target=R03G\_17422, score=0, range=2125-2147, stran  
target 5' UCUUCUGCGCCACUUCUUCAUCA 3'  
:::::::::::::::::::::::::::  
query 3' AGAAGACGCGGUGAAGAAGUAGU 5'  
query=miR5293, target=R03G\_12532, score=0, range=2830-2852, stran  
target 5' UCUUCUGCGCCACUUCUUCAUCA 3'  
:::::::::::::::::::::::::::  
query 3' AGAAGACGCGGUGAAGAAGUAGU 5'  
query=miR5293, target=R03G\_01936, score=0, range=2830-2852, stran  
target 5' UCUUCUGCGCCACUUCUUCAUCA 3'  
:::::::::::::::::::::::::::  
query 3' AGAAGACGCGGUGAAGAAGUAGU 5'  
query=miR5293, target=R03G\_03619, score=0, range=2716-2738, stran  
target 5' UCUUCUGCGCCACUUCUUCAUCA 3'  
:::::::::::::::::::::::::::  
query 3' AGAAGACGCGGUGAAGAAGUAGU 5'  
query=miR5293, target=R03G\_09493, score=0, range=1648-1670, stran





```

. ::::::::::::::: ::::
query 3' GAAGCUUGUAUCGUCACUUGCU 5'
query=miR917, target=R03G_01593, score=4, range=376-397, strand=-
target 5' CUUCAACAUGGUGGUGAACGA 3'
:::: :::::::::::::::
query 3' GAAGCUUGUAUCGUCACUUGCU 5'
query=miR1167, target=R03G_04690, score=2, range=406-427, strand=
target 5' GUUUCAGUCAUCCACAGUCCA 3'
::::: :::::::::::::::
query 3' CAAAGUUCAGUAGGUGUCGGGU 5'
query=miR1167, target=R03G_16729, score=2, range=274-295, strand=
target 5' GUUUCAGUCAUCCACAGUCCA 3'
::::: :::::::::::::::
query 3' CAAAGUUCAGUAGGUGUCGGGU 5'
query=miR1167, target=R03G_14560, score=2, range=274-295, strand=
target 5' GUUUCAGUCAUCCACAGUCCA 3'
::::: :::::::::::::::
query 3' CAAAGUUCAGUAGGUGUCGGGU 5'
query=miR1167, target=R03G_15141, score=2, range=406-427, strand=
target 5' GUUUCAGUCAUCCACAGUCCA 3'
::::: :::::::::::::::
query 3' CAAAGUUCAGUAGGUGUCGGGU 5'
query=miR1167, target=R03G_02822, score=2, range=406-427, strand=
target 5' GUUUCAGUCAUCCACAGUCCA 3'
::::: :::::::::::::::
query 3' CAAAGUUCAGUAGGUGUCGGGU 5'
query=miR1167, target=R03G_02713, score=2, range=136-157, strand=
target 5' GUUUCAGUCAUCCACAGUCCA 3'
::::: :::::::::::::::
query 3' CAAAGUUCAGUAGGUGUCGGGU 5'
query=miR1167, target=R03G_08115, score=2, range=136-157, strand=
target 5' GUUUCAGUCAUCCACAGUCCA 3'
::::: :::::::::::::::
query 3' CAAAGUUCAGUAGGUGUCGGGU 5'
query=miR1167, target=R03G_05421, score=2, range=154-175, strand=
target 5' GUUUCAGUCAUCCACAGUCCA 3'
::::: :::::::::::::::
query 3' CAAAGUUCAGUAGGUGUCGGGU 5'
query=miR1167, target=R03G_00304, score=2, range=406-427, strand=
target 5' GUUUCAGUCAUCCACAGUCCA 3'
::::: :::::::::::::::
query 3' CAAAGUUCAGUAGGUGUCGGGU 5'
query=miR1167, target=R03G_05431, score=3, range=406-427, strand=
target 5' GUUUCAGUCGUCCACAGUCCA 3'
::::: :::::::::::::::

```



query 3' CAAAGUUCAGUAGGUGUCGGGU 5'  
query=miR1167, target=R03G\_07112, score=3, range=229-250, strand=  
target 5' GUUCCAGUCAUCUACAGUCCA 3'  
.....  
query 3' CAAAGUUCAGUAGGUGUCGGGU 5'  
query=miR1167, target=R03G\_12666, score=3, range=37-58, strand=-1  
target 5' GUUCCAGUCGUCCACAGUCCA 3'  
.....  
query 3' CAAAGUUCAGUAGGUGUCGGGU 5'  
query=miR1167, target=R03G\_09168, score=3, range=406-427, strand=  
target 5' GUUCCAGUCGUCCAUAGCCCA 3'  
.....  
query 3' CAAAGUUCAGUAGGUGUCGGGU 5'  
query=miR1167, target=R03G\_10762, score=3, range=406-427, strand=  
target 5' GUUCCAGUCGUCCAUAGCCCA 3'  
.....  
query 3' CAAAGUUCAGUAGGUGUCGGGU 5'  
query=miR1167, target=R03G\_10770, score=3, range=406-427, strand=  
target 5' GUUCCAGUCGUCCAUAGCCCA 3'  
.....  
query 3' CAAAGUUCAGUAGGUGUCGGGU 5'  
query=miR1167, target=R03G\_08663, score=3, range=406-427, strand=  
target 5' GUUCCAGUCAUCUACAGUCCA 3'  
.....  
query 3' CAAAGUUCAGUAGGUGUCGGGU 5'  
query=miR1167, target=R03G\_13858, score=3, range=37-58, strand=-1  
target 5' GUUCCAGUCGUCCACAGUCCA 3'  
.....  
query 3' CAAAGUUCAGUAGGUGUCGGGU 5'  
query=miR1167, target=R03G\_07129, score=3, range=274-295, strand=  
target 5' GUUCCAGUCGUCCACAGUCCA 3'  
.....  
query 3' CAAAGUUCAGUAGGUGUCGGGU 5'  
query=miR1167, target=R03G\_01188, score=3, range=274-295, strand=  
target 5' GUUCCAGUCGUCCACAGUCCA 3'  
.....  
query 3' CAAAGUUCAGUAGGUGUCGGGU 5'  
query=miR1167, target=R03G\_12071, score=3, range=37-58, strand=-1  
target 5' GUUCCAGUCGUCCACAGUCCA 3'  
.....  
query 3' CAAAGUUCAGUAGGUGUCGGGU 5'  
query=miR1167, target=R03G\_03764, score=3, range=37-58, strand=-1  
target 5' GUUCCAGUCGUCCACAGUCCA 3'  
.....  
query 3' CAAAGUUCAGUAGGUGUCGGGU 5'



query=miR1167, target=R03G\_16359, score=4, range=406-427, strand=  
target 5' GUUUCAGUCAUCUAUAGUCCA 3'  
::::: ::::::::::::::::::::  
query 3' CAAAGUUCAGUAGGUGUCGGGU 5'  
query=miR1167, target=R03G\_09612, score=4, range=406-427, strand=  
target 5' GUUUCAGUCAUCUAUAGUCCA 3'  
::::: ::::::::::::::::::::  
query 3' CAAAGUUCAGUAGGUGUCGGGU 5'  
query=miR1167, target=R03G\_07688, score=4, range=406-427, strand=  
target 5' GUUUCAGUCAUCUAUAGUCCA 3'  
::::: ::::::::::::::::::::  
query 3' CAAAGUUCAGUAGGUGUCGGGU 5'  
query=miR1167, target=R03G\_10866, score=4, range=406-427, strand=  
target 5' GUUUCAGUCAUCUAUAGUCCA 3'  
::::: ::::::::::::::::::::  
query 3' CAAAGUUCAGUAGGUGUCGGGU 5'  
query=miR1167, target=R03G\_16545, score=4, range=406-427, strand=  
target 5' GUUUCAGUCAUCUAUAGUCCA 3'  
::::: ::::::::::::::::::::  
query 3' CAAAGUUCAGUAGGUGUCGGGU 5'  
query=miR1167, target=R03G\_13271, score=4, range=406-427, strand=  
target 5' GUUUCAGUCAUCUAUAGUCCA 3'  
::::: ::::::::::::::::::::  
query 3' CAAAGUUCAGUAGGUGUCGGGU 5'  
query=miR1167, target=R03G\_00255, score=4, range=406-427, strand=  
target 5' GUUUCAGUCAUCUAUAGUCCA 3'  
::::: ::::::::::::::::::::  
query 3' CAAAGUUCAGUAGGUGUCGGGU 5'  
query=miR1167, target=R03G\_12954, score=4, range=406-427, strand=  
target 5' GUUUCAGUCGUUCACAGUCCA 3'  
::::: ::::::::::::::::::::  
query 3' CAAAGUUCAGUAGGUGUCGGGU 5'  
query=miR1167, target=R03G\_13266, score=4, range=184-205, strand=  
target 5' GUUUCAGUCAUCUAUAGUCCA 3'  
::::: ::::::::::::::::::::  
query 3' CAAAGUUCAGUAGGUGUCGGGU 5'  
query=miR1167, target=R03G\_03766, score=4, range=184-205, strand=  
target 5' GUUUCAGUCAUCUAUAGUCCA 3'  
::::: ::::::::::::::::::::  
query 3' CAAAGUUCAGUAGGUGUCGGGU 5'  
query=miR1167, target=R03G\_13147, score=4, range=184-205, strand=  
target 5' GUUUCAGUCAUCUAUAGUCCA 3'  
::::: ::::::::::::::::::::  
query 3' CAAAGUUCAGUAGGUGUCGGGU 5'  
query=miR1167, target=R03G\_06722, score=4, range=406-427, strand=





query=miR1513a-5p, target=R03G\_17411, score=3.5, range=1112-1132,  
strand=1  
target 5' GCAAUCAAUGGCUUUG-UCA 3'  
:::: :: :::::::::::::: ::  
query 3' CGUUCAGGUACCGAAACAAGU 5'  
query=miR1513a-5p, target=R03G\_03072, score=3.5, range=465-485,  
strand=1  
target 5' GAAAGGAUAUGGCUUUGUUCA 3'  
: ::: .:::::::::::::  
query 3' CGUUCAGGUACCGAAACAAGU 5'  
query=miR1513a-5p, target=R03G\_06449, score=4, range=3435-3454,  
strand=-1  
target 5' GUGA-UCCAAGGCUUUGUUCA 3'  
:..: :::: ::::::::::::::  
query 3' CGUUCAGGUACCGAAACAAGU 5'  
query=miR1513a-5p, target=R03G\_16135, score=4, range=267-286,  
strand=-1  
target 5' GCAAUCAAUGGCUUUG-UCA 3'  
:::: :: :::::::::::::: ::  
query 3' CGUUCAGGUACCGAAACAAGU 5'  
query=miR1513a-5p, target=R03G\_01941, score=4, range=267-286,  
strand=-1  
target 5' GCAAUCAAUGGCUUUG-UCA 3'  
:::: :: :::::::::::::: ::  
query 3' CGUUCAGGUACCGAAACAAGU 5'  
query=miR1513a-5p, target=R03G\_09956, score=4, range=267-286,  
strand=-1  
target 5' GCAAUCAAUGGCUUUG-UCA 3'  
:::: :: :::::::::::::: ::  
query 3' CGUUCAGGUACCGAAACAAGU 5'  
query=miR1513a-5p, target=R03G\_03105, score=4, range=267-286,  
strand=-1  
target 5' GCAAUCAAUGGCUUUG-UCA 3'  
:::: :: :::::::::::::: ::  
query 3' CGUUCAGGUACCGAAACAAGU 5'  
query=miR1513a-5p, target=R03G\_10523, score=4, range=267-286,  
strand=-1  
target 5' GCAAUCAAUGGCUUUG-UCA 3'  
:::: :: :::::::::::::: ::  
query 3' CGUUCAGGUACCGAAACAAGU 5'  
query=miR1513a-5p, target=R03G\_15285, score=4, range=267-286,  
strand=-1  
target 5' GCAAUCAAUGGCUUUG-UCA 3'  
:::: :: :::::::::::::: ::  
query 3' CGUUCAGGUACCGAAACAAGU 5'

query=miR1513a-5p, target=R03G\_04217, score=4, range=267-286,  
strand=-1  
target 5' GCAAUCAAUGGCUUUG-UCA 3'  
:::: :: ::::::::::: :::  
query 3' CGUUCAGGUACCGAAACAAGU 5'  
query=miR1513a-5p, target=R03G\_07679, score=4, range=36-55, stran  
target 5' GCAAUCAAUGGCUUUG-UCA 3'  
:::: :: ::::::::::: :::  
query 3' CGUUCAGGUACCGAAACAAGU 5'  
query=miR1513a-5p, target=R03G\_09932, score=4, range=267-286,  
strand=-1  
target 5' GCAAUCAAUGGCUUUG-UCA 3'  
:::: :: ::::::::::: :::  
query 3' CGUUCAGGUACCGAAACAAGU 5'  
query=miR1513a-5p, target=R03G\_11770, score=4, range=267-286,  
strand=-1  
target 5' GCAAUCAAUGGCUUUG-UCA 3'  
:::: :: ::::::::::: :::  
query 3' CGUUCAGGUACCGAAACAAGU 5'  
query=miR6114-5p, target=R03G\_00301, score=0, range=954-974, stra  
target 5' UCACGUUCAUGGUGCUUUCGA 3'  
::::::::::::::::::::::::::  
query 3' AGUGCAAGUACCACGAAAGCU 5'  
query=miR6114-5p, target=R03G\_13432, score=0, range=348-368, stra  
target 5' UCACGUUCAUGGUGCUUUCGA 3'  
::::::::::::::::::::::::::  
query 3' AGUGCAAGUACCACGAAAGCU 5'  
query=miR6478, target=R03G\_19017, score=0, range=1-22, strand=-1  
target 5' CUACCAACUGAGCUAAGGCCGG 3'  
::::::::::::::::::::::::::  
query 3' GAUGGUUGACUCGAUUCGGCC 5'  
query=miR6478, target=R03G\_19074, score=0, range=1-22, strand=-1  
target 5' CUACCAACUGAGCUAAGGCCGG 3'  
::::::::::::::::::::::::::  
query 3' GAUGGUUGACUCGAUUCGGCC 5'  
query=miR6478, target=R03G\_19106, score=0, range=1-22, strand=-1  
target 5' CUACCAACUGAGCUAAGGCCGG 3'  
::::::::::::::::::::::::::  
query 3' GAUGGUUGACUCGAUUCGGCC 5'  
query=miR6478, target=R03G\_19164, score=0, range=1-22, strand=-1  
target 5' CUACCAACUGAGCUAAGGCCGG 3'  
::::::::::::::::::::::::::  
query 3' GAUGGUUGACUCGAUUCGGCC 5'  
query=miR6478, target=R03G\_19144, score=0, range=1-22, strand=-1  
target 5' CUACCAACUGAGCUAAGGCCGG 3'

```
.....
query 3' GAUGGUUGACUCGAUUCCGGCC 5'
query=miR6478, target=R03G_19194, score=0, range=1-22, strand=-1
target 5' CUACCAACUGAGCUAAGGCCGG 3'
.....
query 3' GAUGGUUGACUCGAUUCCGGCC 5'
query=miR6478, target=R03G_19112, score=0, range=1-22, strand=-1
target 5' CUACCAACUGAGCUAAGGCCGG 3'
.....
query 3' GAUGGUUGACUCGAUUCCGGCC 5'
query=miR6478, target=R03G_19210, score=0, range=1-22, strand=-1
target 5' CUACCAACUGAGCUAAGGCCGG 3'
.....
query 3' GAUGGUUGACUCGAUUCCGGCC 5'
query=miR6478, target=R03G_19195, score=0, range=1-22, strand=-1
target 5' CUACCAACUGAGCUAAGGCCGG 3'
.....
query 3' GAUGGUUGACUCGAUUCCGGCC 5'
query=miR1214, target=R03G_17226, score=0, range=1271-1290, stran
target 5' GUGCCGCGAGACUCUAAGUA 3'
.....
query 3' CACGGCGCUCUGAGAUUCAU 5'
query=miR1214, target=R03G_16815, score=0, range=1271-1290, stran
target 5' GUGCCGCGAGACUCUAAGUA 3'
.....
query 3' CACGGCGCUCUGAGAUUCAU 5'
query=miR1214, target=R03G_14795, score=0, range=1271-1290, stran
target 5' GUGCCGCGAGACUCUAAGUA 3'
.....
query 3' CACGGCGCUCUGAGAUUCAU 5'
query=miR1214, target=R03G_16392, score=2, range=251-270, strand=
target 5' GUGUGGUGAGACUCUAAGUA 3'
... ..
query 3' CACGGCGCUCUGAGAUUCAU 5'
query=miR1214, target=R03G_02091, score=3.5, range=112-130, stran
target 5' GUACC-CGAGACUUUAAGUG 3'
:: :: .....
query 3' CACGGCGCUCUGAGAUUCAU 5'
query=miR1214, target=R03G_16382, score=4, range=1123-1143, stran
target 5' GUAGCCGCGAGAUUCUACGUA 3'
:: .....
query 3' CA-CGGCGCUCUGAGAUUCAU 5'
query=miR2100-5p, target=R03G_05925, score=0, range=867-888, stra
target 5' UCGUUUGGCAGACUUGAGAGCA 3'
.....
```



query 3' AGCAAACCGUCUGAACUCUCGU 5'  
query=miR2100-5p, target=R03G\_12075, score=0, range=867-888, strand=1  
target 5' UCGUUUGGCAGACUUGAGAGCA 3'  
::::::::::::::::::::::::::

query 3' AGCAAACCGUCUGAACUCUCGU 5'  
query=miR2100-5p, target=R03G\_16708, score=0, range=867-888, strand=1  
target 5' UCGUUUGGCAGACUUGAGAGCA 3'  
::::::::::::::::::::::::::

query 3' AGCAAACCGUCUGAACUCUCGU 5'  
query=miR2100-5p, target=R03G\_09951, score=0, range=1125-1146, strand=-1  
target 5' UCGUUUGGCAGACUUGAGAGCA 3'  
::::::::::::::::::::::::::

query 3' AGCAAACCGUCUGAACUCUCGU 5'  
query=miR2100-5p, target=R03G\_00684, score=0, range=246-267, strand=1  
target 5' UCGUUUGGCAGACUUGAGAGCA 3'  
::::::::::::::::::::::::::

query 3' AGCAAACCGUCUGAACUCUCGU 5'  
query=miR2100-5p, target=R03G\_11952, score=3, range=1245-1266, strand=-1  
target 5' ACGCUUAGCAGACUUGAGAGCA 3'  
:: :: ::::::::::::::::::::

query 3' AGCAAACCGUCUGAACUCUCGU 5'  
query=miR2100-5p, target=R03G\_12964, score=3, range=867-888, strand=1  
target 5' ACGCUUAGCAGACUUGAGAGCA 3'  
:: :: ::::::::::::::::::::

query 3' AGCAAACCGUCUGAACUCUCGU 5'  
query=miR2100-5p, target=R03G\_09927, score=3, range=867-888, strand=1  
target 5' ACGCUUAGCAGACUUGAGAGCA 3'  
:: :: ::::::::::::::::::::

query 3' AGCAAACCGUCUGAACUCUCGU 5'  
query=miR2100-5p, target=R03G\_05927, score=3, range=867-888, strand=1  
target 5' ACGCUUAGCAGACUUGAGAGCA 3'  
:: :: ::::::::::::::::::::

query 3' AGCAAACCGUCUGAACUCUCGU 5'  
query=miR2100-5p, target=R03G\_12669, score=3, range=867-888, strand=1  
target 5' ACGCUUAGCAGACUUGAGAGCA 3'  
:: :: ::::::::::::::::::::

query 3' AGCAAACCGUCUGAACUCUCGU 5'  
query=miR2100-5p, target=R03G\_12961, score=3, range=1200-1221, strand=-1  
target 5' ACGCUUAGCAGACUUGAGAGCA 3'  
:: :: ::::::::::::::::::::

query 3' AGCAAACCGUCUGAACUCUCGU 5'  
query=miR2100-5p, target=R03G\_05524, score=3, range=867-888, strand=1

target 5' ACGCUUAGCAGACUUGAGAGCA 3'  
:: :: ::::::::::::::::::::  
query 3' AGCAAACCGUCUGAACUCUCGU 5'  
query=miR2867-3p, target=R03G\_05953, score=0, range=796-815, stra  
target 5' UGGCCAUCCCAAAGUCCUGA 3'  
:::::::::::::::::::  
query 3' ACCGGUAGGGUUUCAGGACU 5'  
query=miR2867-3p, target=R03G\_17069, score=0, range=661-680, stra  
target 5' UGGCCAUCCCAAAGUCCUGA 3'  
:::::::::::::::::::  
query 3' ACCGGUAGGGUUUCAGGACU 5'  
query=miR2867-3p, target=R03G\_14568, score=0, range=796-815, stra  
target 5' UGGCCAUCCCAAAGUCCUGA 3'  
:::::::::::::::::::  
query 3' ACCGGUAGGGUUUCAGGACU 5'  
query=miR2867-3p, target=R03G\_09967, score=0, range=796-815, stra  
target 5' UGGCCAUCCCAAAGUCCUGA 3'  
:::::::::::::::::::  
query 3' ACCGGUAGGGUUUCAGGACU 5'  
query=miR2867-3p, target=R03G\_00256, score=0, range=796-815, stra  
target 5' UGGCCAUCCCAAAGUCCUGA 3'  
:::::::::::::::::::  
query 3' ACCGGUAGGGUUUCAGGACU 5'  
query=miR2867-3p, target=R03G\_17449, score=0, range=796-815, stra  
target 5' UGGCCAUCCCAAAGUCCUGA 3'  
:::::::::::::::::::  
query 3' ACCGGUAGGGUUUCAGGACU 5'  
query=miR2867-3p, target=R03G\_14361, score=0, range=796-815, stra  
target 5' UGGCCAUCCCAAAGUCCUGA 3'  
:::::::::::::::::::  
query 3' ACCGGUAGGGUUUCAGGACU 5'  
query=miR2867-3p, target=R03G\_07860, score=0, range=796-815, stra  
target 5' UGGCCAUCCCAAAGUCCUGA 3'  
:::::::::::::::::::  
query 3' ACCGGUAGGGUUUCAGGACU 5'  
query=miR2867-3p, target=R03G\_05267, score=0, range=796-815, stra  
target 5' UGGCCAUCCCAAAGUCCUGA 3'  
:::::::::::::::::::  
query 3' ACCGGUAGGGUUUCAGGACU 5'  
query=miR2867-3p, target=R03G\_05921, score=0, range=796-815, stra  
target 5' UGGCCAUCCCAAAGUCCUGA 3'  
:::::::::::::::::::  
query 3' ACCGGUAGGGUUUCAGGACU 5'  
query=miR2867-3p, target=R03G\_11966, score=0, range=796-815, stra  
target 5' UGGCCAUCCCAAAGUCCUGA 3'

query 3' ACCGGUAGGGUUUCAGGACU 5'  
query=miR2867-3p, target=R03G\_05959, score=0, range=796-815, strand=1  
target 5' UGGCCAUCCCAAAGUCCUGA 3'

query 3' ACCGGUAGGGUUUCAGGACU 5'  
query=miR2867-3p, target=R03G\_10729, score=0.5, range=796-815, strand=1  
target 5' UGGCUAUCCCAAAGUCCUGA 3'

query 3' ACCGGUAGGGUUUCAGGACU 5'  
query=miR2867-3p, target=R03G\_04207, score=1, range=796-815, strand=1  
target 5' UGGCCAUCCCAAAGUCCUGA 3'

query 3' ACCGGUAGGGUUUCAGGACU 5'  
query=miR2867-3p, target=R03G\_09945, score=1, range=520-539, strand=1  
target 5' UGGACAUCCCAAAGUCCUGA 3'

query 3' ACCGGUAGGGUUUCAGGACU 5'  
query=miR2867-3p, target=R03G\_01942, score=1, range=793-812, strand=1  
target 5' UGGACAUCCCAAAGUCCUGA 3'

query 3' ACCGGUAGGGUUUCAGGACU 5'  
query=miR2867-3p, target=R03G\_09194, score=1, range=796-815, strand=1  
target 5' UGGACAUCCCAAAGUCCUGA 3'

query 3' ACCGGUAGGGUUUCAGGACU 5'  
query=miR2867-3p, target=R03G\_04210, score=2, range=796-815, strand=1  
target 5' UGGCCAUCCCAAAGCCCUGA 3'

query 3' ACCGGUAGGGUUUCAGGACU 5'  
query=miR2867-3p, target=R03G\_10780, score=2, range=796-815, strand=1  
target 5' UGGCCAUCCCAAAGCCCUGA 3'

query 3' ACCGGUAGGGUUUCAGGACU 5'  
query=miR2867-3p, target=R03G\_10773, score=2, range=796-815, strand=1  
target 5' UGGCCAUCCCAAAGCCCUGA 3'

query 3' ACCGGUAGGGUUUCAGGACU 5'  
query=miR2867-3p, target=R03G\_08835, score=2, range=106-125, strand=1  
target 5' UGGCCAGCUCAAAGUCCUGA 3'

query 3' ACCGGUAGGGUUUCAGGACU 5'  
query=miR2867-3p, target=R03G\_11244, score=2, range=796-815, strand=1  
target 5' UGGCCAGCUCAAAGUCCUGA 3'

query 3' ACCGGUAGGGUUUCAGGACU 5'  
query=miR2867-3p, target=R03G\_01313, score=2, range=796-815, str  
target 5' UGGCCAGCUCAAAGUCCUGA 3'

query 3' ACCGGUAGGGUUUCAGGACU 5'  
query=miR2867-3p, target=R03G\_13447, score=2, range=796-815, str  
target 5' UGGCCAGCUCAAAGUCCUGA 3'

query 3' ACCGGUAGGGUUUCAGGACU 5'  
query=miR2867-3p, target=R03G\_15154, score=2, range=796-815, str  
target 5' UGGCCAGCUCAAAGUCCUGA 3'

query 3' ACCGGUAGGGUUUCAGGACU 5'  
query=miR2867-3p, target=R03G\_10720, score=2, range=796-815, str  
target 5' UGGCCAGCUCAAAGUCCUGA 3'

query 3' ACCGGUAGGGUUUCAGGACU 5'  
query=miR2867-3p, target=R03G\_10044, score=2, range=796-815, str  
target 5' UGGCCAGCUCAAAGUCCUGA 3'

query 3' ACCGGUAGGGUUUCAGGACU 5'  
query=miR2867-3p, target=R03G\_03987, score=2, range=796-815, str  
target 5' UGGCCAGCUCAAAGUCCUGA 3'

query 3' ACCGGUAGGGUUUCAGGACU 5'  
query=miR2867-3p, target=R03G\_03558, score=2, range=796-815, str  
target 5' UGGCCAGCUCAAAGUCCUGA 3'

query 3' ACCGGUAGGGUUUCAGGACU 5'  
query=miR2867-3p, target=R03G\_01951, score=2, range=796-815, str  
target 5' UGGCCAGCUCAAAGUCCUGA 3'

query 3' ACCGGUAGGGUUUCAGGACU 5'  
query=miR2867-3p, target=R03G\_01194, score=2, range=796-815, str  
target 5' UGGCCAGCUCAAAGUCCUGA 3'

query 3' ACCGGUAGGGUUUCAGGACU 5'  
query=miR2867-3p, target=R03G\_09924, score=2, range=796-815, str  
target 5' UGGCCAGCUCAAAGUCCUGA 3'

query 3' ACCGGUAGGGUUUCAGGACU 5'  
query=miR2867-3p, target=R03G\_05916, score=2, range=796-815, str  
target 5' UGGCCAGCUCAAAGUCCUGA 3'

query 3' ACCGGUAGGGUUUCAGGACU 5'  
query=miR2867-3p, target=R03G\_11948, score=2, range=796-815, str  
target 5' UGGCCAGCUCAAAGUCCUGA 3'  
.....  
query 3' ACCGGUAGGGUUUCAGGACU 5'  
query=miR2867-3p, target=R03G\_15873, score=2, range=796-815, str  
target 5' UGGCCAGCUCAAAGUCCUGA 3'  
.....  
query 3' ACCGGUAGGGUUUCAGGACU 5'  
query=miR2867-3p, target=R03G\_17409, score=2, range=796-815, str  
target 5' UGGCCAGCUCAAAGUCCUGA 3'  
.....  
query 3' ACCGGUAGGGUUUCAGGACU 5'  
query=miR2867-3p, target=R03G\_07683, score=2, range=796-815, str  
target 5' UGGCCAGCUCAAAGUCCUGA 3'  
.....  
query 3' ACCGGUAGGGUUUCAGGACU 5'  
query=miR2867-3p, target=R03G\_07994, score=2, range=796-815, str  
target 5' UGGCCAGCUCAAAGUCCUGA 3'  
.....  
query 3' ACCGGUAGGGUUUCAGGACU 5'  
query=miR2867-3p, target=R03G\_13706, score=2, range=754-773, str  
target 5' UGGCCAGCUCAAAGUCCUGA 3'  
.....  
query 3' ACCGGUAGGGUUUCAGGACU 5'  
query=miR2867-3p, target=R03G\_12526, score=2, range=796-815, str  
target 5' UGGCCAGCUCAAAGUCCUGA 3'  
.....  
query 3' ACCGGUAGGGUUUCAGGACU 5'  
query=miR2867-3p, target=R03G\_01950, score=2, range=796-815, str  
target 5' UGGCCAGCUCAAAGUCCUGA 3'  
.....  
query 3' ACCGGUAGGGUUUCAGGACU 5'  
query=miR2867-3p, target=R03G\_09199, score=2, range=796-815, str  
target 5' UGGCCAGCUCAAAGUCCUGA 3'  
.....  
query 3' ACCGGUAGGGUUUCAGGACU 5'  
query=miR2867-3p, target=R03G\_12174, score=2, range=121-140, str  
target 5' UGGCCAGCUCAAAGUCCUGA 3'  
.....  
query 3' ACCGGUAGGGUUUCAGGACU 5'  
query=miR2867-3p, target=R03G\_17213, score=2, range=121-140, str  
target 5' UGGCCAGCUCAAAGUCCUGA 3'  
.....  
query 3' ACCGGUAGGGUUUCAGGACU 5'

query=miR2867-3p, target=R03G\_17211, score=2, range=796-815, strand  
target 5' UGGCCAGCUCAAAGUCCUGA 3'  
:::::: ::::::::::::::  
query 3' ACCGGUAGGGUUUCAGGACU 5'  
query=miR2867-3p, target=R03G\_12013, score=2, range=121-140, strand  
target 5' UGGCCAGCUCAAAGUCCUGA 3'  
:::::: ::::::::::::::  
query 3' ACCGGUAGGGUUUCAGGACU 5'  
query=miR2867-3p, target=R03G\_07119, score=2, range=121-140, strand  
target 5' UGGCCAGCUCAAAGUCCUGA 3'  
:::::: ::::::::::::::  
query 3' ACCGGUAGGGUUUCAGGACU 5'  
query=miR2867-3p, target=R03G\_10528, score=2, range=121-140, strand  
target 5' UGGCCAGCUCAAAGUCCUGA 3'  
:::::: ::::::::::::::  
query 3' ACCGGUAGGGUUUCAGGACU 5'  
query=miR2867-3p, target=R03G\_11263, score=2, range=121-140, strand  
target 5' UGGCCAGCUCAAAGUCCUGA 3'  
:::::: ::::::::::::::  
query 3' ACCGGUAGGGUUUCAGGACU 5'  
query=miR2867-3p, target=R03G\_10742, score=2, range=121-140, strand  
target 5' UGGCCAGCUCAAAGUCCUGA 3'  
:::::: ::::::::::::::  
query 3' ACCGGUAGGGUUUCAGGACU 5'  
query=miR2867-3p, target=R03G\_11528, score=2, range=121-140, strand  
target 5' UGGCCAGCUCAAAGUCCUGA 3'  
:::::: ::::::::::::::  
query 3' ACCGGUAGGGUUUCAGGACU 5'  
query=miR2867-3p, target=R03G\_07295, score=2, range=628-647, strand  
target 5' UGGCCAGCUCAAAGUCCUGA 3'  
:::::: ::::::::::::::  
query 3' ACCGGUAGGGUUUCAGGACU 5'  
query=miR2867-3p, target=R03G\_13276, score=2, range=178-197, strand  
target 5' UGGCCAGCUCAAAGUCCUGA 3'  
:::::: ::::::::::::::  
query 3' ACCGGUAGGGUUUCAGGACU 5'  
query=miR2867-3p, target=R03G\_01735, score=2, range=796-815, strand  
target 5' UGGCCAGCUCAAAGUCCUGA 3'  
:::::: ::::::::::::::  
query 3' ACCGGUAGGGUUUCAGGACU 5'  
query=miR2867-3p, target=R03G\_03617, score=2, range=796-815, strand  
target 5' UGGCCAGCUCAAAGUCCUGA 3'  
:::::: ::::::::::::::  
query 3' ACCGGUAGGGUUUCAGGACU 5'  
query=miR2867-3p, target=R03G\_16118, score=2, range=64-83, strand

```
target 5' UGGCCAGCUCAAAGUCCUGA 3'
:::::: :.::::::::::::
query 3' ACCGGUAGGGUUUCAGGACU 5'
query=miR2867-3p, target=R03G_10537, score=2, range=619-638, stra
target 5' UGGCCAGCUCAAAGUCCUGA 3'
:::::: :.::::::::::::
query 3' ACCGGUAGGGUUUCAGGACU 5'
query=miR2867-3p, target=R03G_09542, score=2.5, range=796-815,
strand=1
target 5' UGGCCAUCCCAAAGCCCUGG 3'
:::::::::::::::::: :.:.
query 3' ACCGGUAGGGUUUCAGGACU 5'
query=miR2867-3p, target=R03G_16377, score=3, range=121-140, stra
target 5' UGGCCAGCUCAAAGUUCUGA 3'
:::::: :.::::::::::::
query 3' ACCGGUAGGGUUUCAGGACU 5'
query=miR2867-3p, target=R03G_17406, score=3, range=157-176, stra
target 5' UGGCCAGCCCAAAGUCCCGA 3'
:::::: :.:::::::::::: :.
query 3' ACCGGUAGGGUUUCAGGACU 5'
query=miR2867-3p, target=R03G_05950, score=3, range=274-293, stra
target 5' UGGCCAGCCCAAAGUCCCGA 3'
:::::: :.:::::::::::: :.
query 3' ACCGGUAGGGUUUCAGGACU 5'
query=miR2867-3p, target=R03G_16715, score=3, range=256-275, stra
target 5' UGGCCAGCCCAAAGUCCCGA 3'
:::::: :.:::::::::::: :.
query 3' ACCGGUAGGGUUUCAGGACU 5'
query=miR2867-3p, target=R03G_03605, score=3, range=1258-1277,
strand=1
target 5' UGGCCAGCCCAAAGUCCCGA 3'
:::::: :.:::::::::::: :.
query 3' ACCGGUAGGGUUUCAGGACU 5'
query=miR2867-3p, target=R03G_00677, score=3, range=358-377, stra
target 5' UGGCCAGCCCAAAGUCCCGA 3'
:::::: :.:::::::::::: :.
query 3' ACCGGUAGGGUUUCAGGACU 5'
query=miR2867-3p, target=R03G_01588, score=3, range=136-155, stra
target 5' UGGCCAGCCCAAAGUCCCGA 3'
:::::: :.:::::::::::: :.
query 3' ACCGGUAGGGUUUCAGGACU 5'
query=miR2867-3p, target=R03G_14620, score=3, range=241-260, stra
target 5' UGGCCUGCUCAAAGUCCUGA 3'
:::::: :.::::::::::::
query 3' ACCGGUAGGGUUUCAGGACU 5'
```

query=miR2867-3p, target=R03G\_03785, score=3, range=418-437, str  
target 5' UGGCCUGCUCAAAGUCCUGA 3'  
::::: ::::::::::::::  
query 3' ACCGGUAGGGUUUCAGGACU 5'  
query=miR2867-3p, target=R03G\_10224, score=3, range=613-632, str  
target 5' UGGCCUGCUCAAAGUCCUGA 3'  
::::: ::::::::::::::  
query 3' ACCGGUAGGGUUUCAGGACU 5'  
query=miR2867-3p, target=R03G\_07302, score=3, range=613-632, str  
target 5' UGGCCUGCUCAAAGUCCUGA 3'  
::::: ::::::::::::::  
query 3' ACCGGUAGGGUUUCAGGACU 5'  
query=miR2867-3p, target=R03G\_09944, score=3, range=613-632, str  
target 5' UGGCCUGCUCAAAGUCCUGA 3'  
::::: ::::::::::::::  
query 3' ACCGGUAGGGUUUCAGGACU 5'  
query=miR2867-3p, target=R03G\_00247, score=3, range=613-632, str  
target 5' UGGCCUGCUCAAAGUCCUGA 3'  
::::: ::::::::::::::  
query 3' ACCGGUAGGGUUUCAGGACU 5'  
query=miR2867-3p, target=R03G\_17436, score=3, range=613-632, str  
target 5' UGGCCUGCUCAAAGUCCUGA 3'  
::::: ::::::::::::::  
query 3' ACCGGUAGGGUUUCAGGACU 5'  
query=miR2867-3p, target=R03G\_07689, score=3, range=613-632, str  
target 5' UGGCCUGCUCAAAGUCCUGA 3'  
::::: ::::::::::::::  
query 3' ACCGGUAGGGUUUCAGGACU 5'  
query=miR2867-3p, target=R03G\_17293, score=3, range=613-632, str  
target 5' UGGCCUGCUCAAAGUCCUGA 3'  
::::: ::::::::::::::  
query 3' ACCGGUAGGGUUUCAGGACU 5'  
query=miR2867-3p, target=R03G\_11405, score=3, range=613-632, str  
target 5' UGGCCUGCUCAAAGUCCUGA 3'  
::::: ::::::::::::::  
query 3' ACCGGUAGGGUUUCAGGACU 5'  
query=miR2867-3p, target=R03G\_15672, score=3, range=613-632, str  
target 5' UGGCCUGCUCAAAGUCCUGA 3'  
::::: ::::::::::::::  
query 3' ACCGGUAGGGUUUCAGGACU 5'  
query=miR2867-3p, target=R03G\_12670, score=3, range=613-632, str  
target 5' UGGCCUGCUCAAAGUCCUGA 3'  
::::: ::::::::::::::  
query 3' ACCGGUAGGGUUUCAGGACU 5'  
query=miR2867-3p, target=R03G\_04200, score=3, range=613-632, str





```
target 5' UGGCCUGUCCAAAGUCCUGG 3'
::::: .::::::::::::.
query 3' ACCGGUAGGGUUUCAGGACU 5'
query=miR2867-3p, target=R03G_11765, score=3.5, range=238-257,
strand=1
target 5' UGGCCUGUCCAAAGUCCUGG 3'
::::: .::::::::::::.
query 3' ACCGGUAGGGUUUCAGGACU 5'
query=miR2867-3p, target=R03G_12030, score=3.5, range=360-379,
strand=-1
target 5' UGAUCAUCCCAAAGUCUUGU 3'
:: .::::::::::::.
query 3' ACCGGUAGGGUUUCAGGACU 5'
query=miR2867-3p, target=R03G_15271, score=4, range=796-815, stra
target 5' UGGCCAUCACAAAGUCCAGA 3'
::::: ::::::::::: ::
query 3' ACCGGUAGGGUUUCAGGACU 5'
query=miR2867-3p, target=R03G_01962, score=4, range=547-566, stra
target 5' UGGCCAUCACAAAGUCCAGA 3'
::::: ::::::::::: ::
query 3' ACCGGUAGGGUUUCAGGACU 5'
query=miR2867-3p, target=R03G_16725, score=4, range=538-557, stra
target 5' UGGCCAUCACAAAGUCCAGA 3'
::::: ::::::::::: ::
query 3' ACCGGUAGGGUUUCAGGACU 5'
query=miR2867-3p, target=R03G_13714, score=4, range=796-815, stra
target 5' UGGCCAUCACAAAGUCCAGA 3'
::::: ::::::::::: ::
query 3' ACCGGUAGGGUUUCAGGACU 5'
query=miR2867-3p, target=R03G_16742, score=4, range=796-815, stra
target 5' UGGCCAUCACAAAGUCCAGA 3'
::::: ::::::::::: ::
query 3' ACCGGUAGGGUUUCAGGACU 5'
query=miR2867-3p, target=R03G_04674, score=4, range=547-566, stra
target 5' UGGCCAUCACAAAGUCCAGA 3'
::::: ::::::::::: ::
query 3' ACCGGUAGGGUUUCAGGACU 5'
query=miR2867-3p, target=R03G_17416, score=4, range=796-815, stra
target 5' UGGCCAUCACAAAGUCCAGA 3'
::::: ::::::::::: ::
query 3' ACCGGUAGGGUUUCAGGACU 5'
query=miR2867-3p, target=R03G_02824, score=4, range=796-815, stra
target 5' UGGCCAUCACAAAGUCCAGA 3'
::::: ::::::::::: ::
query 3' ACCGGUAGGGUUUCAGGACU 5'
```

query=miR2867-3p, target=R03G\_17291, score=4, range=796-815, str  
target 5' UGGCCAUCACAAAGUCCAGA 3'  
::::: ::::: ::  
query 3' ACCGGUAGGGUUUCAGGACU 5'  
query=miR2867-3p, target=R03G\_07702, score=4, range=547-566, str  
target 5' UGGCCAUCGCAAAGUCCAGA 3'  
::::: ::::: ::  
query 3' ACCGGUAGGGUUUCAGGACU 5'  
query=miR2867-3p, target=R03G\_16420, score=4, range=547-566, str  
target 5' UGGCCAUCGCAAAGUCCAGA 3'  
::::: ::::: ::  
query 3' ACCGGUAGGGUUUCAGGACU 5'  
query=miR2867-3p, target=R03G\_07867, score=4, range=547-566, str  
target 5' UGGCCAUCACAAAGUCCAGA 3'  
::::: ::::: ::  
query 3' ACCGGUAGGGUUUCAGGACU 5'  
query=miR2867-3p, target=R03G\_16372, score=4, range=796-815, str  
target 5' UGGCCAUCACAAAGUCCAGA 3'  
::::: ::::: ::  
query 3' ACCGGUAGGGUUUCAGGACU 5'  
query=miR2867-3p, target=R03G\_07705, score=4, range=796-815, str  
target 5' UGGCCAUCGCAAAGUCCAGA 3'  
::::: ::::: ::  
query 3' ACCGGUAGGGUUUCAGGACU 5'  
query=miR2867-3p, target=R03G\_01328, score=4, range=796-815, str  
target 5' UGGCCAUCACAAAGUCCAGA 3'  
::::: ::::: ::  
query 3' ACCGGUAGGGUUUCAGGACU 5'  
query=miR2867-3p, target=R03G\_15282, score=4, range=520-539, str  
target 5' UGGCCAUCGCAAAGUCCAGA 3'  
::::: ::::: ::  
query 3' ACCGGUAGGGUUUCAGGACU 5'  
query=miR2867-3p, target=R03G\_17387, score=4, range=796-815, str  
target 5' UGGCCAUCACAAAGUCCAGA 3'  
::::: ::::: ::  
query 3' ACCGGUAGGGUUUCAGGACU 5'  
query=miR2867-3p, target=R03G\_17399, score=4, range=796-815, str  
target 5' UGGCCAUCACAAAGUCCAGA 3'  
::::: ::::: ::  
query 3' ACCGGUAGGGUUUCAGGACU 5'  
query=miR2867-3p, target=R03G\_06717, score=4, range=796-815, str  
target 5' UGGCCAUCACAAAGUCCAGA 3'  
::::: ::::: ::  
query 3' ACCGGUAGGGUUUCAGGACU 5'  
query=miR2867-3p, target=R03G\_16123, score=4, range=796-815, str



target 5' CCUUUAUCCCAAAGUCCUGA 3'  
.....  
query 3' ACCGGUAGGGUUUCAGGACU 5'  
query=miR2867-3p, target=R03G\_11534, score=4, range=796-815, stra  
target 5' UGGCCAGCUCAAAGCCUGA 3'  
..... :..... :.....  
query 3' ACCGGUAGGGUUUCAGGACU 5'  
query=miR2867-3p, target=R03G\_02700, score=4, range=490-509, stra  
target 5' UGGCCAGCUCAAAGUCCCGA 3'  
..... :..... :..  
query 3' ACCGGUAGGGUUUCAGGACU 5'  
query=miR2867-3p, target=R03G\_03570, score=4, range=490-509, stra  
target 5' UGGCCAGCUCAAAGUCCCGA 3'  
..... :..... :..  
query 3' ACCGGUAGGGUUUCAGGACU 5'  
query=miR2867-3p, target=R03G\_09955, score=4, range=490-509, stra  
target 5' UGGCCAGCUCAAAGUCCCGA 3'  
..... :..... :..  
query 3' ACCGGUAGGGUUUCAGGACU 5'  
query=miR2867-3p, target=R03G\_11273, score=4, range=136-155, stra  
target 5' UGGCCAGCUCAAAGUCCCGA 3'  
..... :..... :..  
query 3' ACCGGUAGGGUUUCAGGACU 5'  
query=miR2867-3p, target=R03G\_16905, score=4, range=613-632, stra  
target 5' UGGCCAGCUCAAAGUCCCGA 3'  
..... :..... :..  
query 3' ACCGGUAGGGUUUCAGGACU 5'  
query=miR2867-3p, target=R03G\_12196, score=4, range=727-746, stra  
target 5' UGGCCAGCUCAAAGUCCAGA 3'  
..... :..... :..  
query 3' ACCGGUAGGGUUUCAGGACU 5'  
query=miR2867-3p, target=R03G\_04786, score=4, range=373-392, stra  
target 5' UGGCCAGCUCAAAGUCCCGA 3'  
..... :..... :..  
query 3' ACCGGUAGGGUUUCAGGACU 5'  
query=miR2867-3p, target=R03G\_12525, score=4, range=727-746, stra  
target 5' UGGCCAGCUCAAAGUCCCGA 3'  
..... :..... :..  
query 3' ACCGGUAGGGUUUCAGGACU 5'  
query=miR2867-3p, target=R03G\_00690, score=4, range=745-764, stra  
target 5' UGGCCAGCUCAAAGUCCCGA 3'  
..... :..... :..  
query 3' ACCGGUAGGGUUUCAGGACU 5'  
query=miR2867-3p, target=R03G\_12186, score=4, range=805-824, stra  
target 5' UGGCCAGCUCAAAGUCCAGA 3'

```
::::: ::::: ::
query 3' ACCGGUAGGGUUUCAGGACU 5'
query=miR2867-3p, target=R03G_01925, score=4, range=805-824, str
target 5' UGGCCAGCUCAAAGUCCCGA 3'
::::: ::::: ::
query 3' ACCGGUAGGGUUUCAGGACU 5'
query=miR2867-3p, target=R03G_07024, score=4, range=805-824, str
target 5' UGGCCAGCUCAAAGUCCCGA 3'
::::: ::::: ::
query 3' ACCGGUAGGGUUUCAGGACU 5'
query=miR2867-3p, target=R03G_07121, score=4, range=805-824, str
target 5' UGGCCAGCUCAAAGUCCCGA 3'
::::: ::::: ::
query 3' ACCGGUAGGGUUUCAGGACU 5'
query=miR2867-3p, target=R03G_08848, score=4, range=106-125, str
target 5' UGGCCAGCUCAAAGCCCUGA 3'
::::: ::::: ::
query 3' ACCGGUAGGGUUUCAGGACU 5'
query=miR2867-3p, target=R03G_14467, score=4, range=382-401, str
target 5' UGGCCUGCCCAAAGCCCUGA 3'
::::: ::::: ::
query 3' ACCGGUAGGGUUUCAGGACU 5'
query=miR2867-3p, target=R03G_04661, score=4, range=436-455, str
target 5' UGGCCUGCCCAAAGUCCCGA 3'
::::: ::::: ::
query 3' ACCGGUAGGGUUUCAGGACU 5'
query=miR2867-3p, target=R03G_09167, score=4, range=614-632, str
target 5' UGCCUG-CUCAAAGUCCUGA 3'
:: .. ::::: ::
query 3' ACCGGUAGGGUUUCAGGACU 5'
query=miR5554a-5p, target=R03G_07863, score=0, range=109-131, str
target 5' AACAUUGUUCAAGAUCUGCAACA 3'
::::: ::::: ::
query 3' UUGUAACAAGUUCUAGACGUUGU 5'
query=miR5554a-5p, target=R03G_14562, score=0, range=46-68, stran
target 5' AACAUUGUUCAAGAUCUGCAACA 3'
::::: ::::: ::
query 3' UUGUAACAAGUUCUAGACGUUGU 5'
query=miR5554a-5p, target=R03G_16903, score=0, range=46-68, stran
target 5' AACAUUGUUCAAGAUCUGCAACA 3'
::::: ::::: ::
query 3' UUGUAACAAGUUCUAGACGUUGU 5'
query=miR5554a-5p, target=R03G_17220, score=1, range=109-131, str
target 5' AACAUUGCUCUAGAUCUGCAACA 3'
::::: ::::: ::
```



query 3' CCGUUACCGACUACUUAGAU 5'  
query=miR3703, target=R03G\_11969, score=2, range=1323-1342, stran  
target 5' GGCAAUGGCUGAUGAAUCA 3'

query 3' CCGUUACCGACUACUUAGAU 5'  
query=miR3703, target=R03G\_13273, score=2, range=1323-1342, stran  
target 5' GGCAAUGGCUGAUGAAUCA 3'

query 3' CCGUUACCGACUACUUAGAU 5'  
query=miR3703, target=R03G\_15898, score=2, range=1323-1342, stran  
target 5' GGCAAUGGCUGAUGAAUCA 3'

query 3' CCGUUACCGACUACUUAGAU 5'  
query=miR3703, target=R03G\_16749, score=2, range=1323-1342, stran  
target 5' GGCAAUGGCUGAUGAAUCA 3'

query 3' CCGUUACCGACUACUUAGAU 5'  
query=miR3703, target=R03G\_11237, score=2, range=1323-1342, stran  
target 5' GGCAAUGGCUGAUGAAUCA 3'

query 3' CCGUUACCGACUACUUAGAU 5'  
query=miR3703, target=R03G\_04683, score=2, range=1323-1342, stran  
target 5' GGCAAUGGCUGAUGAAUCA 3'

query 3' CCGUUACCGACUACUUAGAU 5'  
query=miR3703, target=R03G\_11409, score=2, range=1323-1342, stran  
target 5' GGCAAUGGCUGAUGAAUCA 3'

query 3' CCGUUACCGACUACUUAGAU 5'  
query=miR3703, target=R03G\_04212, score=2, range=1323-1342, stran  
target 5' GGCAAUGGCUGAUGAAUCA 3'

query 3' CCGUUACCGACUACUUAGAU 5'  
query=miR3703, target=R03G\_13145, score=2, range=1323-1342, stran  
target 5' GGCAAUGGCUGAUGAAUCA 3'

query 3' CCGUUACCGACUACUUAGAU 5'  
query=miR3703, target=R03G\_11538, score=2, range=1323-1342, stran  
target 5' GGCAAUGGCUGAUGAAUCA 3'

query 3' CCGUUACCGACUACUUAGAU 5'  
query=miR3703, target=R03G\_09930, score=2, range=1323-1342, stran  
target 5' GGCAAUGGCUGAUGAAUCA 3'



query 3' CCGUUACCGACUACUUAGAU 5'  
query=miR3703, target=R03G\_01727, score=2, range=408-427, strand=  
target 5' GGCAAUGGCUGAUGAAUCAA 3'  
..... :  
query 3' CCGUUACCGACUACUUAGAU 5'  
query=miR3703, target=R03G\_06731, score=2, range=1323-1342, stran  
target 5' GGCAAUGGCUGAUGAAUCAA 3'  
..... :  
query 3' CCGUUACCGACUACUUAGAU 5'  
query=miR3703, target=R03G\_07307, score=2, range=1323-1342, stran  
target 5' GGCAAUGGCUGAUGAAUCAA 3'  
..... :  
query 3' CCGUUACCGACUACUUAGAU 5'  
query=miR3703, target=R03G\_07698, score=2, range=1323-1342, stran  
target 5' GGCAAUGGCUGAUGAAUCAA 3'  
..... :  
query 3' CCGUUACCGACUACUUAGAU 5'  
query=miR3703, target=R03G\_09601, score=2, range=1323-1342, stran  
target 5' GGCAAUGGCUGAUGAAUCAA 3'  
..... :  
query 3' CCGUUACCGACUACUUAGAU 5'  
query=miR3703, target=R03G\_10217, score=2, range=1323-1342, stran  
target 5' GGCAAUGGCUGAUGAAUCAA 3'  
..... :  
query 3' CCGUUACCGACUACUUAGAU 5'  
query=miR3703, target=R03G\_14550, score=2, range=1323-1342, stran  
target 5' GGCAAUGGCUGAUGAAUCAA 3'  
..... :  
query 3' CCGUUACCGACUACUUAGAU 5'  
query=miR3703, target=R03G\_07980, score=2, range=711-730, strand=  
target 5' GGCAAUGGCUGAUGAAUCAA 3'  
..... :  
query 3' CCGUUACCGACUACUUAGAU 5'  
query=miR3703, target=R03G\_07721, score=2, range=1254-1273, stran  
target 5' GGCAAUGGCUGAUGAAUCAA 3'  
..... :  
query 3' CCGUUACCGACUACUUAGAU 5'  
query=miR3703, target=R03G\_00332, score=3.5, range=378-397, stran  
target 5' GGCAAUGGCUGAAGAAUUUG 3'  
..... :  
query 3' CCGUUACCGACUACUUAGAU 5'  
query=miR3703, target=R03G\_05557, score=3.5, range=969-988, stran  
target 5' UUGGAUGGCUGAUGAAUCUA 3'  
..... :  
query 3' CCGUUACCGACUACUUAGAU 5'

query=miR3703, target=R03G\_10411, score=3.5, range=1855-1873, str  
target 5' GAUAGU-GCUGAUGAAUCUG 3'  
: .:.: :::::::::::::::  
query 3' CCGUUACCGACUACUUAGAU 5'  
query=miR3703, target=R03G\_08231, score=4, range=1242-1261, stran  
target 5' GGCACUAGCUGAUAAAUCUA 3'  
:::: : ::::: :::::  
query 3' CCGUUACCGACUACUUAGAU 5'  
query=miR3703, target=R03G\_01507, score=4, range=1139-1158, stran  
target 5' GGAAAAGGCAGAUGAAUCUA 3'  
:: :: ::: : ::::: :::::  
query 3' CCGUUACCGACUACUUAGAU 5'  
query=miR3703, target=R03G\_09337, score=4, range=375-393, strand=  
target 5' GAUAA-AGCUGAUGAAUCUG 3'  
: .:.: :::::::::::::::  
query 3' CCGUUACCGACUACUUAGAU 5'  
query=miR8554, target=R03G\_03575, score=0, range=2741-2762, stran  
target 5' UCCCAAUCAAAGUCAUAAGCA 3'  
:::::::::::::::::::::  
query 3' AGGGUUUAGUUUCAGUAUUCGU 5'  
query=miR8554, target=R03G\_12067, score=0, range=2741-2762, stran  
target 5' UCCCAAUCAAAGUCAUAAGCA 3'  
:::::::::::::::::::::  
query 3' AGGGUUUAGUUUCAGUAUUCGU 5'  
query=miR8554, target=R03G\_13855, score=0, range=2741-2762, stran  
target 5' UCCCAAUCAAAGUCAUAAGCA 3'  
:::::::::::::::::::::  
query 3' AGGGUUUAGUUUCAGUAUUCGU 5'  
query=miR8554, target=R03G\_13701, score=0, range=2741-2762, stran  
target 5' UCCCAAUCAAAGUCAUAAGCA 3'  
:::::::::::::::::::::  
query 3' AGGGUUUAGUUUCAGUAUUCGU 5'  
query=miR8554, target=R03G\_12014, score=0, range=2741-2762, stran  
target 5' UCCCAAUCAAAGUCAUAAGCA 3'  
:::::::::::::::::::::  
query 3' AGGGUUUAGUUUCAGUAUUCGU 5'  
query=miR8554, target=R03G\_10222, score=0, range=2741-2762, stran  
target 5' UCCCAAUCAAAGUCAUAAGCA 3'  
:::::::::::::::::::::  
query 3' AGGGUUUAGUUUCAGUAUUCGU 5'  
query=miR8554, target=R03G\_12462, score=0, range=2597-2618, stran  
target 5' UCCCAAUCAAAGUCAUAAGCA 3'  
:::::::::::::::::::::  
query 3' AGGGUUUAGUUUCAGUAUUCGU 5'  
query=miR8554, target=R03G\_03796, score=0, range=1934-1955, stran



query 3' GUACAUGGCAGUACUAGGAAAA 5'  
query=miR5080, target=R03G\_15270, score=0, range=147-168, strand=  
target 5' CAUGUACCGUCAUGAUCCUUUU 3'

query 3' GUACAUGGCAGUACUAGGAAAA 5'  
query=miR5080, target=R03G\_06734, score=0, range=402-423, strand=  
target 5' CAUGUACCGUCAUGAUCCUUUU 3'

query 3' GUACAUGGCAGUACUAGGAAAA 5'  
query=miR5080, target=R03G\_08770, score=4, range=290-311, strand=  
target 5' CUGGUACCGUCUUGAUCCUUUU 3'

query 3' GUACAUGGCAGUACUAGGAAAA 5'  
query=miR1222e, target=R03G\_05326, score=0, range=767-788, strand  
target 5' UGUCCACUGAAGCUUCCUUUAA 3'

query 3' ACAGGUGACUUCGAAGGAAAUU 5'  
query=miR1222e, target=R03G\_08618, score=0, range=698-719, strand  
target 5' UGUCCACUGAAGCUUCCUUUAA 3'

query 3' ACAGGUGACUUCGAAGGAAAUU 5'  
query=miR4221, target=R03G\_04030, score=0, range=1211-1233, stran  
target 5' UUUCCUACCUUUUGAACCUCUUA 3'

query 3' AAAGGAUGGAAAACUUGGAGAAU 5'  
query=miR4221, target=R03G\_05627, score=0, range=104-126, strand=  
target 5' UUUCCUACCUUUUGAACCUCUUA 3'

query 3' AAAGGAUGGAAAACUUGGAGAAU 5'  
query=miR4221, target=R03G\_09361, score=0.5, range=890-912, stran  
target 5' UUUCCUAUCUUUUGAACCUCUUA 3'

query 3' AAAGGAUGGAAAACUUGGAGAAU 5'  
query=miR4221, target=R03G\_12138, score=0.5, range=845-867, stran  
target 5' UUUCCUAUCUUUUGAACCUCUUA 3'

query 3' AAAGGAUGGAAAACUUGGAGAAU 5'  
query=miR4221, target=R03G\_05034, score=4, range=158-179, strand=  
target 5' UUUUCU-CUUUUUGAGCCUCUUU 3'

query 3' AAAGGAUGGAAAACUUGGAGAAU 5'  
query=miR396a-3p, target=R03G\_09454, score=2, range=2269-2288,  
strand=-1  
target 5' UUUUCACAGCUUUGUUGAAC 3'



query 3' GAGUGUUGGCAGAAACUUCU 5'  
query=miR4374b, target=R03G\_02233, score=0, range=361-380, strand  
target 5' CUCACAACCGUCUUUGAAGA 3'  
.....  
query 3' GAGUGUUGGCAGAAACUUCU 5'  
query=miR4374b, target=R03G\_14983, score=0, range=637-656, strand  
target 5' CUCACAACCGUCUUUGAAGA 3'  
.....  
query 3' GAGUGUUGGCAGAAACUUCU 5'  
query=miR4374b, target=R03G\_10801, score=0, range=637-656, strand  
target 5' CUCACAACCGUCUUUGAAGA 3'  
.....  
query 3' GAGUGUUGGCAGAAACUUCU 5'  
query=miR4374b, target=R03G\_09614, score=0, range=163-182, strand  
target 5' CUCACAACCGUCUUUGAAGA 3'  
.....  
query 3' GAGUGUUGGCAGAAACUUCU 5'  
query=miR4374b, target=R03G\_03583, score=2, range=637-656, strand  
target 5' CUCACAACAGUCUUUGAAGA 3'  
.....  
query 3' GAGUGUUGGCAGAAACUUCU 5'  
query=miR4374b, target=R03G\_12667, score=2, range=202-221, strand  
target 5' CUCACAACCGUCUUUGAAGA 3'  
.....  
query 3' GAGUGUUGGCAGAAACUUCU 5'  
query=miR4374b, target=R03G\_03116, score=3, range=256-276, strand  
target 5' CUGCAUGACCGUUUUUGAAGA 3'  
:: .....  
query 3' GA-GUGUUGGCAGAAACUUCU 5'  
query=miR4374b, target=R03G\_09836, score=3, range=780-798, strand  
target 5' CUCAU-GCUGUCUUUGAAGA 3'  
.....  
query 3' GAGUGUUGGCAGAAACUUCU 5'  
query=miR4374b, target=R03G\_11295, score=3.5, range=25-44, strand  
target 5' ACCAUAACUGUCUUUGAAGA 3'  
.....  
query 3' GAGUGUUGGCAGAAACUUCU 5'  
query=miR4374b, target=R03G\_16714, score=3.5, range=190-209, stra  
target 5' UUGACAACCGUCUUAGAAGA 3'  
. : .....  
query 3' GAGUGUUGGCAGAAACUUCU 5'  
query=miR4374b, target=R03G\_09352, score=3.5, range=336-356, stra  
target 5' CUCAAAAUCGUCUUAUGAAGA 3'  
.....  
query 3' GAGUGUUGGCAGAA-ACUUCU 5'

query=miR4374b, target=R03G\_09578, score=3.5, range=2535-2553,  
strand=-1  
target 5' UUCA-AACUGUCUUUGAAGC 3'  
.....  
query 3' GAGUGUUGGCAGAAACUUCU 5'  
query=miR4374b, target=R03G\_15506, score=4, range=1832-1850, stra  
target 5' CUU-CUGCUGUCUUUGAAGA 3'  
... : .....  
query 3' GAGUGUUGGCAGAAACUUCU 5'  
query=miR4374b, target=R03G\_10348, score=4, range=1194-1213, stra  
target 5' CUUGAAAUCGUCUUUGAGGA 3'  
.... : .....  
query 3' GAGUGUUGGCAGAAACUUCU 5'  
query=miR4374b, target=R03G\_11686, score=4, range=2820-2838, stra  
target 5' CUCA-GGCCGUCUUUGAACA 3'  
.... : ..... :  
query 3' GAGUGUUGGCAGAAACUUCU 5'  
query=miR4374b, target=R03G\_13429, score=4, range=1953-1971, stra  
target 5' CUCA-GGCCGUCUUUGAACA 3'  
.... : ..... :  
query 3' GAGUGUUGGCAGAAACUUCU 5'  
query=miR4374b, target=R03G\_07567, score=4, range=1122-1140, stra  
target 5' CUCA-GGCCGUCUUUGAACA 3'  
.... : ..... :  
query 3' GAGUGUUGGCAGAAACUUCU 5'  
query=miR4374b, target=R03G\_09089, score=4, range=1122-1140, stra  
target 5' CUCA-GGCCGUCUUUGAACA 3'  
.... : ..... :  
query 3' GAGUGUUGGCAGAAACUUCU 5'  
query=miR4374b, target=R03G\_15417, score=4, range=1371-1389, stra  
target 5' CUCA-GGCCGUCUUUGAACA 3'  
.... : ..... :  
query 3' GAGUGUUGGCAGAAACUUCU 5'  
query=miR4374b, target=R03G\_15078, score=4, range=1122-1140, stra  
target 5' CUCA-GGCCGUCUUUGAACA 3'  
.... : ..... :  
query 3' GAGUGUUGGCAGAAACUUCU 5'  
query=miR4374b, target=R03G\_09251, score=4, range=267-285, strand  
target 5' CUCA-GGCCGUCUUUGAACA 3'  
.... : ..... :  
query 3' GAGUGUUGGCAGAAACUUCU 5'  
query=miR4374b, target=R03G\_13414, score=4, range=99-117, strand=  
target 5' CUCA-GGCCGUCUUUGAACA 3'  
.... : ..... :  
query 3' GAGUGUUGGCAGAAACUUCU 5'

query=miR4374b, target=R03G\_14856, score=4, range=924-942, strand  
target 5' CUCA-GGCCGUCUUUGAACA 3'  
:::: ..::: :  
query 3' GAGUGUUGGCAGAAACUUCU 5'  
query=miR4374b, target=R03G\_14875, score=4, range=924-942, strand  
target 5' CUCA-GGCCGUCUUUGAACA 3'  
:::: ..::: :  
query 3' GAGUGUUGGCAGAAACUUCU 5'  
query=miR4374b, target=R03G\_15709, score=4, range=264-282, strand  
target 5' CUCA-GGCCGUCUUUGAACA 3'  
:::: ..::: :  
query 3' GAGUGUUGGCAGAAACUUCU 5'  
query=miR4374b, target=R03G\_10584, score=4, range=747-765, strand  
target 5' CUCA-GGCCGUCUUUGAACA 3'  
:::: ..::: :  
query 3' GAGUGUUGGCAGAAACUUCU 5'  
query=miR4374b, target=R03G\_14154, score=4, range=99-117, strand=  
target 5' CUCA-GGCCGUCUUUGAACA 3'  
:::: ..::: :  
query 3' GAGUGUUGGCAGAAACUUCU 5'  
query=miR1520g, target=R03G\_19000, score=2, range=2503-2525, stra  
target 5' UUGUCCGUACCAGUUCUAAGUUG 3'  
::::: :  
query 3' AACAGGCAUGGUCAAGACUCAAC 5'  
query=miR1520g, target=R03G\_19002, score=2, range=2503-2525, stra  
target 5' UUGUCCGUACCAGUUCUAAGUUG 3'  
::::: :  
query 3' AACAGGCAUGGUCAAGACUCAAC 5'  
query=miR393b-3p, target=R03G\_15466, score=3.5, range=266-284,  
strand=1  
target 5' GACCAA-GAGGUCGCAUGAU 3'  
.:::: :  
query 3' UAGGUUACUCUAGCGUACUA 5'  
query=miR393b-3p, target=R03G\_15926, score=4, range=347-366, stra  
target 5' AUUUUAUUGACAUCGCAUGAU 3'  
.....: :  
query 3' UAGGUUACUCUAGCGUACUA 5'  
query=miR5544, target=R03G\_12002, score=0, range=544-565, strand=  
target 5' ACCAACUUCCUAUGCGUGUUUU 3'  
::::: :  
query 3' UGGUUGAAGGAUACGCACAAAA 5'  
query=miR5544, target=R03G\_16896, score=0, range=544-565, strand=  
target 5' ACCAACUUCCUAUGCGUGUUUU 3'  
::::: :  
query 3' UGGUUGAAGGAUACGCACAAAA 5'



```

query=miR5544, target=R03G_13296, score=0, range=544-565, strand=
target 5' ACCAACUUCCUAUGCGUGUUUU 3'
::::::::::::::::::::::::::
query 3' UGGUUGAAGGAUACGCACAAAA 5'
query=miR5544, target=R03G_01537, score=0, range=400-421, strand=
target 5' ACCAACUUCCUAUGCGUGUUUU 3'
::::::::::::::::::::::::::
query 3' UGGUUGAAGGAUACGCACAAAA 5'
query=miR5544, target=R03G_03748, score=0, range=220-241, strand=
target 5' ACCAACUUCCUAUGCGUGUUUU 3'
::::::::::::::::::::::::::
query 3' UGGUUGAAGGAUACGCACAAAA 5'
query=miR5544, target=R03G_05583, score=3.5, range=1468-1490, str
target 5' ACCAAAUUGUCUGUGCGUGUUUU 3'
::::: :: .....
query 3' UGGUUGAA-GGAUACGCACAAAA 5'
query=miR5544, target=R03G_01673, score=3.5, range=410-432, stran
target 5' ACCAAAGUUUCUAUGCGUGUUUA 3'
::: :: .....
query 3' UGG-UUGAAGGAUACGCACAAAA 5'
query=miR826b, target=R03G_15287, score=0, range=828-849, strand=
target 5' AUUUUCAUCGAUGUCAAGACCA 3'
::::::::::::::::::::::::::
query 3' UAAAAGUAGCUACAGUUCUGGU 5'
query=miR826b, target=R03G_07134, score=0, range=273-294, strand=
target 5' AUUUUCAUCGAUGUCAAGACCA 3'
::::::::::::::::::::::::::
query 3' UAAAAGUAGCUACAGUUCUGGU 5'
query=miR826b, target=R03G_13291, score=0, range=273-294, strand=
target 5' AUUUUCAUCGAUGUCAAGACCA 3'
::::::::::::::::::::::::::
query 3' UAAAAGUAGCUACAGUUCUGGU 5'
query=miR826b, target=R03G_01722, score=0, range=294-315, strand=
target 5' AUUUUCAUCGAUGUCAAGACCA 3'
::::::::::::::::::::::::::
query 3' UAAAAGUAGCUACAGUUCUGGU 5'
query=miR826b, target=R03G_02952, score=0, range=294-315, strand=
target 5' AUUUUCAUCGAUGUCAAGACCA 3'
::::::::::::::::::::::::::
query 3' UAAAAGUAGCUACAGUUCUGGU 5'
query=miR826b, target=R03G_17431, score=0, range=261-282, strand=
target 5' AUUUUCAUCGAUGUCAAGACCA 3'
::::::::::::::::::::::::::
query 3' UAAAAGUAGCUACAGUUCUGGU 5'
query=miR826b, target=R03G_17247, score=0, range=261-282, strand=

```





query 3' CUGGUCUGCUCUGUUUUUUAU 5'  
query=miR7800, target=R03G\_06722, score=2, range=437-456, strand=  
target 5' GGUCAGACGAGACGAAAAUA 3'  
.....  
query 3' CUGGUCUGCUCUGUUUUUUAU 5'  
query=miR7800, target=R03G\_07112, score=2, range=260-279, strand=  
target 5' GGUCAGACGAGACGAAAAUA 3'  
.....  
query 3' CUGGUCUGCUCUGUUUUUUAU 5'  
query=miR7800, target=R03G\_16359, score=2, range=437-456, strand=  
target 5' GGUCAGACGAGACGAAAAUA 3'  
.....  
query 3' CUGGUCUGCUCUGUUUUUUAU 5'  
query=miR7800, target=R03G\_13271, score=2, range=437-456, strand=  
target 5' GGUCAGACGAGACGAAAAUA 3'  
.....  
query 3' CUGGUCUGCUCUGUUUUUUAU 5'  
query=miR7800, target=R03G\_09612, score=2, range=437-456, strand=  
target 5' GGUCAGACGAGACGAAAAUA 3'  
.....  
query 3' CUGGUCUGCUCUGUUUUUUAU 5'  
query=miR7800, target=R03G\_10866, score=2, range=437-456, strand=  
target 5' GGUCAGACGAGACGAAAAUA 3'  
.....  
query 3' CUGGUCUGCUCUGUUUUUUAU 5'  
query=miR7800, target=R03G\_16545, score=2, range=437-456, strand=  
target 5' GGUCAGACGAGACGAAAAUA 3'  
.....  
query 3' CUGGUCUGCUCUGUUUUUUAU 5'  
query=miR7800, target=R03G\_00255, score=2, range=437-456, strand=  
target 5' GGUCAGACGAGACGAAAAUA 3'  
.....  
query 3' CUGGUCUGCUCUGUUUUUUAU 5'  
query=miR7800, target=R03G\_13266, score=2, range=215-234, strand=  
target 5' GGUCAGACGAGACGAAAAUA 3'  
.....  
query 3' CUGGUCUGCUCUGUUUUUUAU 5'  
query=miR7800, target=R03G\_13277, score=2, range=437-456, strand=  
target 5' GGUCAGACGAGACGAAAAUA 3'  
.....  
query 3' CUGGUCUGCUCUGUUUUUUAU 5'  
query=miR7800, target=R03G\_11266, score=2, range=260-279, strand=  
target 5' GGUCAGACGAGACGAAAAUA 3'  
.....  
query 3' CUGGUCUGCUCUGUUUUUUAU 5'

query=miR7800, target=R03G\_07120, score=2, range=260-279, strand=  
target 5' GGUCAGACGAGACGAAAAUA 3'  
.....  
query 3' CUGGUCUGCUCUGUUUUUAU 5'  
query=miR7800, target=R03G\_15001, score=2, range=260-279, strand=  
target 5' GGUCAGACGAGACGAAAAUA 3'  
.....  
query 3' CUGGUCUGCUCUGUUUUUAU 5'  
query=miR7800, target=R03G\_11240, score=2, range=260-279, strand=  
target 5' GGUCAGACGAGACGAAAAUA 3'  
.....  
query 3' CUGGUCUGCUCUGUUUUUAU 5'  
query=miR7800, target=R03G\_07031, score=2, range=437-456, strand=  
target 5' GGUCAGACGAGACAAAAAUC 3'  
.....  
query 3' CUGGUCUGCUCUGUUUUUAU 5'  
query=miR7800, target=R03G\_16554, score=2, range=437-456, strand=  
target 5' GGUCAGACGAGACAAAAAUC 3'  
.....  
query 3' CUGGUCUGCUCUGUUUUUAU 5'  
query=miR7800, target=R03G\_15146, score=2, range=317-336, strand=  
target 5' GGUCAGACGAGACAAAAAUC 3'  
.....  
query 3' CUGGUCUGCUCUGUUUUUAU 5'  
query=miR7800, target=R03G\_08842, score=2.5, range=437-456, stran  
target 5' GGUCGGACGAGACAAAAAUC 3'  
.....  
query 3' CUGGUCUGCUCUGUUUUUAU 5'  
query=miR7800, target=R03G\_16363, score=2.5, range=437-456, stran  
target 5' GGUCGGACGAGACAAAAAUC 3'  
.....  
query 3' CUGGUCUGCUCUGUUUUUAU 5'  
query=miR7800, target=R03G\_07688, score=3, range=437-456, strand=  
target 5' GGUCAGAUGAGACGAAAAUA 3'  
.....  
query 3' CUGGUCUGCUCUGUUUUUAU 5'  
query=miR7800, target=R03G\_15575, score=3, range=260-279, strand=  
target 5' GGUCAACGAGACGAAAAUA 3'  
.....  
query 3' CUGGUCUGCUCUGUUUUUAU 5'  
query=miR7800, target=R03G\_07877, score=3.5, range=215-234, stran  
target 5' GGUCGGAUGAGACAAAAAUC 3'  
.....  
query 3' CUGGUCUGCUCUGUUUUUAU 5'  
query=miR7800, target=R03G\_13718, score=3.5, range=215-234, stran

target 5' GGUCGGAUGAGACAAAAAUC 3'  
:.....  
query 3' CUGGUCUGCUCUGUUUUUUAU 5'  
query=miR7800, target=R03G\_13147, score=3.5, range=215-234, stran  
target 5' GGUCGGAUGAGACAAAAAUC 3'  
:.....  
query 3' CUGGUCUGCUCUGUUUUUUAU 5'  
query=miR7800, target=R03G\_03772, score=3.5, range=437-456, stran  
target 5' GGUCGGAUGAGACAAAAAUC 3'  
:.....  
query 3' CUGGUCUGCUCUGUUUUUUAU 5'  
query=miR7800, target=R03G\_13733, score=3.5, range=215-234, stran  
target 5' GGUCGGAUGAGACAAAAAUC 3'  
:.....  
query 3' CUGGUCUGCUCUGUUUUUUAU 5'  
query=miR7800, target=R03G\_17363, score=3.5, range=179-198, stran  
target 5' GGUCGGAUGAGACAAAAAUC 3'  
:.....  
query 3' CUGGUCUGCUCUGUUUUUUAU 5'  
query=miR7800, target=R03G\_03113, score=3.5, range=179-198, stran  
target 5' GGUCGGAUGAGACAAAAAUC 3'  
:.....  
query 3' CUGGUCUGCUCUGUUUUUUAU 5'  
query=miR7800, target=R03G\_02844, score=3.5, range=215-234, stran  
target 5' GGUCGGAUGAGACAAAAAUC 3'  
:.....  
query 3' CUGGUCUGCUCUGUUUUUUAU 5'  
query=miR7800, target=R03G\_03766, score=3.5, range=215-234, stran  
target 5' GGUCGGAUGAGACAAAAAUC 3'  
:.....  
query 3' CUGGUCUGCUCUGUUUUUUAU 5'  
query=miR7800, target=R03G\_13137, score=3.5, range=437-456, stran  
target 5' GGUCGGAUGAGACAAAAAUC 3'  
:.....  
query 3' CUGGUCUGCUCUGUUUUUUAU 5'  
query=miR7800, target=R03G\_01618, score=3.5, range=437-456, stran  
target 5' GGUCGGAUGAGACAAAAAUC 3'  
:.....  
query 3' CUGGUCUGCUCUGUUUUUUAU 5'  
query=miR7800, target=R03G\_14150, score=4, range=118-137, strand=  
target 5' GACGAGAUGAGGCAAAGAUA 3'  
::: :.....  
query 3' CUGGUCUGCUCUGUUUUUUAU 5'  
query=miR7800, target=R03G\_03803, score=4, range=260-279, strand=  
target 5' GGUCAGAAGAGACGAAAAUA 3'

.....  
query 3' CUGGUCUGCUCUGUUUUUUAU 5'  
query=miR7800, target=R03G\_13502, score=4, range=268-287, strand=  
target 5' GACCAGUCGAGAAAAGAAUA 3'  
.....  
query 3' CUGGUCUGCUCUGUUUUUUAU 5'  
query=miR7800, target=R03G\_00482, score=4, range=116-136, strand=  
target 5' GAACAGACGAGAUGAAAAUA 3'  
:: .....  
query 3' CUGGUCUGCUCUG-UUUUUUAU 5'  
query=miR7800, target=R03G\_15651, score=4, range=232-250, strand=  
target 5' GA-CAGACGAUACAAAAUC 3'  
:: .....  
query 3' CUGGUCUGCUCUGUUUUUUAU 5'  
query=miR7800, target=R03G\_06934, score=4, range=1364-1384, stran  
target 5' GACCAGCAGAGACCAAAAAUA 3'  
.....  
query 3' CUGGUCUGCUCU-GUUUUUUAU 5'  
query=miR9759, target=R03G\_02835, score=0, range=188-209, strand=  
target 5' AUAAACUCGUACUUGCUUACUA 3'  
.....  
query 3' UAUUUGAGCAUGAACGAAUGAU 5'  
query=miR9759, target=R03G\_07109, score=0, range=188-209, strand=  
target 5' AUAAACUCGUACUUGCUUACUA 3'  
.....  
query 3' UAUUUGAGCAUGAACGAAUGAU 5'  
query=miR9759, target=R03G\_09197, score=0, range=188-209, strand=  
target 5' AUAAACUCGUACUUGCUUACUA 3'  
.....  
query 3' UAUUUGAGCAUGAACGAAUGAU 5'  
query=miR9759, target=R03G\_09934, score=0, range=188-209, strand=  
target 5' AUAAACUCGUACUUGCUUACUA 3'  
.....  
query 3' UAUUUGAGCAUGAACGAAUGAU 5'  
query=miR9759, target=R03G\_15283, score=0, range=188-209, strand=  
target 5' AUAAACUCGUACUUGCUUACUA 3'  
.....  
query 3' UAUUUGAGCAUGAACGAAUGAU 5'  
query=miR9759, target=R03G\_10526, score=0, range=188-209, strand=  
target 5' AUAAACUCGUACUUGCUUACUA 3'  
.....  
query 3' UAUUUGAGCAUGAACGAAUGAU 5'  
query=miR9759, target=R03G\_01935, score=0, range=188-209, strand=  
target 5' AUAAACUCGUACUUGCUUACUA 3'  
.....

query 3' UAUUUGAGCAUGAACGAAUGAU 5'  
query=miR9759, target=R03G\_02813, score=3.5, range=830-852, stran  
target 5' AUGAAGAUCGUUUUGCUUACUA 3'  
:: :: .....  
query 3' UA-UUUGAGCAUGAACGAAUGAU 5'  
query=miR9759, target=R03G\_07672, score=4, range=188-209, strand=  
target 5' AUAAACUCGUACUUGCCUACCA 3'  
..... : :  
query 3' UAUUUGAGCAUGAACGAAUGAU 5'  
query=miR857, target=R03G\_12721, score=1.5, range=81-100, strand=  
target 5' CGCACCUUUUAACAUACAAAA 3'  
.....  
query 3' GUGUGGAAGUUGUAUGUUUU 5'  
query=miR857, target=R03G\_06407, score=3, range=306-325, strand=1  
target 5' GACACCUUUUAACAUACAAGA 3'  
.....  
query 3' GUGUGGAAGUUGUAUGUUUU 5'  
query=miR857, target=R03G\_02274, score=3, range=2480-2499, strand  
target 5' UGCCUUUUAACAUACAAAA 3'  
... ..  
query 3' GUGUGGAAGUUGUAUGUUUU 5'  
query=miR857, target=R03G\_13922, score=3, range=1522-1540, strand  
target 5' CA-AAUUUCAACAUACAAG 3'  
:: : .....query 3' GUGUGGAAGUUGUAUGUUUU 5'  
query=miR857, target=R03G\_16060, score=3.5, range=930-949, strand  
target 5' CACAUCUUCAACAUUGCAAGU 3'  
.....  
query 3' GUGUGGAAGUUGUAUGUUUU 5'  
query=miR857, target=R03G\_07199, score=3.5, range=152-170, strand  
target 5' UACG-UUUCGACAUACAAAA 3'  
... ..  
query 3' GUGUGGAAGUUGUAUGUUUU 5'  
query=miR857, target=R03G\_01274, score=3.5, range=378-397, strand  
target 5' UAGCCCUUUUAACAUACAAAA 3'  
.. : .....query 3' GUGUGGAAGUUGUAUGUUUU 5'  
query=miR857, target=R03G\_03519, score=3.5, range=1670-1689, stra  
target 5' CACAUCAUCAGCAUAUAAAA 3'  
..... : .....query 3' GUGUGGAAGUUGUAUGUUUU 5'  
query=miR857, target=R03G\_03719, score=3.5, range=1586-1605, stra  
target 5' CACAUCGUCAGCAUAUAAAA 3'  
..... : .....query 3' GUGUGGAAGUUGUAUGUUUU 5'





target 5' CGCG-AUUCAACAUGCAAAA 3'  
:.:. :.....  
query 3' GUGUGGAAGUUGUAUGUUUU 5'  
query=miR857, target=R03G\_00772, score=4, range=445-465, strand=1  
target 5' CACCACCGUCAACAUACCAAA 3'  
:: :... :..... :...  
query 3' GU-GUGGAAGUUGUAUGUUUU 5'  
query=miR857, target=R03G\_17016, score=4, range=271-290, strand=1  
target 5' CGAGCGGUCAACAUAACAAA 3'  
:. .: :.....  
query 3' GUGUGGAAGUUGUAUGUUUU 5'  
query=miR857, target=R03G\_08895, score=4, range=354-372, strand=1  
target 5' UUUACCUUCAACA-ACAAA 3'  
. :..... :.....  
query 3' GUGUGGAAGUUGUAUGUUUU 5'  
query=miR857, target=R03G\_00356, score=4, range=536-555, strand=-  
target 5' CACACCUUCAACAAUGAAA 3'  
:..... :.....  
query 3' GUGUGGAAGUUGUAUGUUUU 5'  
query=miR857, target=R03G\_14105, score=4, range=164-183, strand=-  
target 5' UACAUCAUCGGCAUACAAA 3'  
. :..... :.....  
query 3' GUGUGGAAGUUGUAUGUUUU 5'  
query=miR9411, target=R03G\_03002, score=4, range=1486-1504, stran  
target 5' GCUCGUGUAAGUCGUCCUU 3'  
:.....  
query 3' AAUGCACAUUCAGCAGGAU 5'  
query=miR9411, target=R03G\_06596, score=4, range=1486-1504, stran  
target 5' GCUCGUGUAAGUCGUCCUU 3'  
:.....  
query 3' AAUGCACAUUCAGCAGGAU 5'  
query=miR9411, target=R03G\_13001, score=4, range=1486-1504, stran  
target 5' GCUCGUGUAAGUCGUCCUU 3'  
:.....  
query 3' AAUGCACAUUCAGCAGGAU 5'  
query=miR9411, target=R03G\_13169, score=4, range=218-235, strand=  
target 5' UCAC-UGUAAGUGGUCCUA 3'  
: : :..... :.....  
query 3' AAUGCACAUUCAGCAGGAU 5'  
query=miR9411, target=R03G\_13840, score=4, range=768-785, strand=  
target 5' UCGCGUG-AAGUCGUCCUG 3'  
: : :..... :.....  
query 3' AAUGCACAUUCAGCAGGAU 5'  
query=miR9411, target=R03G\_06362, score=4, range=2544-2561, stran  
target 5' UUAACUGU-AGUCGUCCUA 3'

```

::: ::: :
query 3' AAUGCACAUUCAGCAGGAU 5'
query=miR9411, target=R03G_16788, score=4, range=514-531, strand=
target 5' UUGAGUGUAAGU-GUCCUG 3'
::: :
query 3' AAUGCACAUUCAGCAGGAU 5'
query=miR1023e-3p, target=R03G_17387, score=0, range=78-99, stran
target 5' AUGCACUCCAACCCGUUCCCA 3'
:
query 3' UACGUGAGGUUGGGCAAAGGGU 5'
query=miR1023e-3p, target=R03G_01205, score=0, range=78-99, stran
target 5' AUGCACUCCAACCCGUUCCCA 3'
:
query 3' UACGUGAGGUUGGGCAAAGGGU 5'
query=miR1023e-3p, target=R03G_00238, score=0, range=78-99, stran
target 5' AUGCACUCCAACCCGUUCCCA 3'
:
query 3' UACGUGAGGUUGGGCAAAGGGU 5'
query=miR1023e-3p, target=R03G_10795, score=0, range=78-99, stran
target 5' AUGCACUCCAACCCGUUCCCA 3'
:
query 3' UACGUGAGGUUGGGCAAAGGGU 5'
query=miR1023e-3p, target=R03G_16698, score=0, range=78-99, stran
target 5' AUGCACUCCAACCCGUUCCCA 3'
:
query 3' UACGUGAGGUUGGGCAAAGGGU 5'
query=miR1023e-3p, target=R03G_05521, score=0, range=78-99, stran
target 5' AUGCACUCCAACCCGUUCCCA 3'
:
query 3' UACGUGAGGUUGGGCAAAGGGU 5'
query=miR1023e-3p, target=R03G_12539, score=0.5, range=78-99,
strand=-1
target 5' AUGCACUUCAACCCGUUCCCA 3'
:
query 3' UACGUGAGGUUGGGCAAAGGGU 5'
query=miR1023e-3p, target=R03G_09494, score=0.5, range=78-99,
strand=-1
target 5' AUGCACUUCAACCCGUUCCCA 3'
:
query 3' UACGUGAGGUUGGGCAAAGGGU 5'
query=miR1023e-3p, target=R03G_09498, score=0.5, range=78-99,
strand=-1
target 5' AUGCACUUCAACCCGUUCCCA 3'
:
query 3' UACGUGAGGUUGGGCAAAGGGU 5'

```

query=miR1023e-3p, target=R03G\_12542, score=0.5, range=78-99,  
strand=-1  
target 5' AUGCACUUCAACCCGUUCCCCA 3'  
.....  
query 3' UACGUGAGGUUGGGCAAAGGGU 5'  
query=miR1023e-3p, target=R03G\_05640, score=1, range=78-99, stran  
target 5' AUGCACUCCAACUCGUUCCCCA 3'  
.....  
query 3' UACGUGAGGUUGGGCAAAGGGU 5'  
query=miR1023e-3p, target=R03G\_17416, score=1, range=78-99, stran  
target 5' AUGCACUCCAACUCGUUCCCCA 3'  
.....  
query 3' UACGUGAGGUUGGGCAAAGGGU 5'  
query=miR1023e-3p, target=R03G\_16742, score=1, range=78-99, stran  
target 5' AUGCACUCCAACUCGUUCCCCA 3'  
.....  
query 3' UACGUGAGGUUGGGCAAAGGGU 5'  
query=miR1023e-3p, target=R03G\_17291, score=1, range=78-99, stran  
target 5' AUGCACUCCAACUCGUUCCCCA 3'  
.....  
query 3' UACGUGAGGUUGGGCAAAGGGU 5'  
query=miR1023e-3p, target=R03G\_02824, score=1, range=78-99, stran  
target 5' AUGCACUCCAACUCGUUCCCCA 3'  
.....  
query 3' UACGUGAGGUUGGGCAAAGGGU 5'  
query=miR1023e-3p, target=R03G\_13714, score=1, range=78-99, stran  
target 5' AUGCACUCCAACUCGUUCCCCA 3'  
.....  
query 3' UACGUGAGGUUGGGCAAAGGGU 5'  
query=miR1023e-3p, target=R03G\_16372, score=1, range=78-99, stran  
target 5' AUGCACUCCAACUCGUUCCCCA 3'  
.....  
query 3' UACGUGAGGUUGGGCAAAGGGU 5'  
query=miR1023e-3p, target=R03G\_07705, score=1, range=78-99, stran  
target 5' AUGCACUCCAACCCGUUUCUCA 3'  
.....  
query 3' UACGUGAGGUUGGGCAAAGGGU 5'  
query=miR1023e-3p, target=R03G\_06717, score=1, range=78-99, stran  
target 5' AUGCACUCCAACUCGUUCCCCA 3'  
.....  
query 3' UACGUGAGGUUGGGCAAAGGGU 5'  
query=miR1023e-3p, target=R03G\_17399, score=1, range=78-99, stran  
target 5' AUGCACUCCAACUCGUUCCCCA 3'  
.....  
query 3' UACGUGAGGUUGGGCAAAGGGU 5'

query=miR1023e-3p, target=R03G\_16123, score=1, range=78-99, stran  
target 5' AUGCACUCCAACUCGUUCCCCA 3'  
::::::::::::::::::::::::::  
query 3' UACGUGAGGUUGGGCAAAGGGU 5'  
query=miR1023e-3p, target=R03G\_01328, score=1, range=78-99, stran  
target 5' AUGCACUCCAACUCGUUCCCCA 3'  
::::::::::::::::::::::::::  
query 3' UACGUGAGGUUGGGCAAAGGGU 5'  
query=miR1023e-3p, target=R03G\_07137, score=1, range=78-99, stran  
target 5' AUGCACUCCAACUCGUUCCCCA 3'  
::::::::::::::::::::::::::  
query 3' UACGUGAGGUUGGGCAAAGGGU 5'  
query=miR1023e-3p, target=R03G\_05268, score=1, range=78-99, stran  
target 5' AUGCACUCCAACUCGUUCCCCA 3'  
::::::::::::::::::::::::::  
query 3' UACGUGAGGUUGGGCAAAGGGU 5'  
query=miR1023e-3p, target=R03G\_17355, score=1, range=78-99, stran  
target 5' AUGCACUCCAACUCGUUCCCCA 3'  
::::::::::::::::::::::::::  
query 3' UACGUGAGGUUGGGCAAAGGGU 5'  
query=miR1023e-3p, target=R03G\_12663, score=1, range=78-99, stran  
target 5' AUGCACUCCAACUCGUUCCCCA 3'  
::::::::::::::::::::::::::  
query 3' UACGUGAGGUUGGGCAAAGGGU 5'  
query=miR1023e-3p, target=R03G\_14770, score=1, range=78-99, stran  
target 5' AUGCACUCCAACUCGUUCCCCA 3'  
::::::::::::::::::::::::::  
query 3' UACGUGAGGUUGGGCAAAGGGU 5'  
query=miR1023e-3p, target=R03G\_11781, score=1, range=78-99, stran  
target 5' AUGCACUCCAACUCGUUCCCCA 3'  
::::::::::::::::::::::::::  
query 3' UACGUGAGGUUGGGCAAAGGGU 5'  
query=miR1023e-3p, target=R03G\_07984, score=1, range=78-99, stran  
target 5' AUGCACUCCAACUCGUUCCCCA 3'  
::::::::::::::::::::::::::  
query 3' UACGUGAGGUUGGGCAAAGGGU 5'  
query=miR1023e-3p, target=R03G\_15261, score=1, range=78-99, stran  
target 5' AUGCACUCCAACUCGUUCCCCA 3'  
::::::::::::::::::::::::::  
query 3' UACGUGAGGUUGGGCAAAGGGU 5'  
query=miR1023e-3p, target=R03G\_17017, score=1, range=78-99, stran  
target 5' AUGCACUCCAACUCGUUCCCCA 3'  
::::::::::::::::::::::::::  
query 3' UACGUGAGGUUGGGCAAAGGGU 5'  
query=miR1023e-3p, target=R03G\_12653, score=1, range=516-537,

strand=-1  
target 5' AUGCACUCCAACUCGUUCCCCA 3'  
::::::::::::::::::::::::::  
query 3' UACGUGAGGUUGGGCAAAGGGU 5'  
query=miR1023e-3p, target=R03G\_04682, score=1, range=78-99, stran  
target 5' AUGCACUCCAACUCGUUCCCCA 3'  
::::::::::::::::::::::::::  
query 3' UACGUGAGGUUGGGCAAAGGGU 5'  
query=miR1023e-3p, target=R03G\_16383, score=1, range=78-99, stran  
target 5' AUGCACUCCAACUCGUUCCCCA 3'  
::::::::::::::::::::::::::  
query 3' UACGUGAGGUUGGGCAAAGGGU 5'  
query=miR1023e-3p, target=R03G\_11270, score=1, range=78-99, stran  
target 5' AUGCACUCCAACUCGUUCCCCA 3'  
::::::::::::::::::::::::::  
query 3' UACGUGAGGUUGGGCAAAGGGU 5'  
query=miR1023e-3p, target=R03G\_17466, score=1, range=78-99, stran  
target 5' AUGCACUCCAACUCGUUCCCCA 3'  
::::::::::::::::::::::::::  
query 3' UACGUGAGGUUGGGCAAAGGGU 5'  
query=miR1023e-3p, target=R03G\_17278, score=1, range=78-99, stran  
target 5' AUGCACUCCAACCCGUUUCUCA 3'  
::::::::::::::::::::::::::  
query 3' UACGUGAGGUUGGGCAAAGGGU 5'  
query=miR1023e-3p, target=R03G\_00245, score=1, range=78-99, stran  
target 5' AUGCACUCCAACCCGUUUCUCA 3'  
::::::::::::::::::::::::::  
query 3' UACGUGAGGUUGGGCAAAGGGU 5'  
query=miR1023e-3p, target=R03G\_17344, score=1, range=78-99, stran  
target 5' AUGCACUCCAACUCGUUCCCCA 3'  
::::::::::::::::::::::::::  
query 3' UACGUGAGGUUGGGCAAAGGGU 5'  
query=miR1023e-3p, target=R03G\_09937, score=1.5, range=78-99,  
strand=-1  
target 5' AUGCAUCCAACCCGUUUCUCA 3'  
::::::::::::::::::::::::::  
query 3' UACGUGAGGUUGGGCAAAGGGU 5'  
query=miR1023e-3p, target=R03G\_04117, score=2.5, range=78-99,  
strand=-1  
target 5' AUGCACUCCAACCCAUUCCCCA 3'  
::::::::::::::::::::::::::  
query 3' UACGUGAGGUUGGGCAAAGGGU 5'  
query=miR1023e-3p, target=R03G\_15271, score=3, range=78-99, stran  
target 5' AUGCACUCCGACACGUUCCCCA 3'  
::::::::::::::::::::::::::

query 3' UACGUGAGGUUGGGCAAAGGGU 5'  
query=miR1023e-3p, target=R03G\_11235, score=3, range=78-99, stran  
target 5' AUGCACUCCGACACGUUCCCA 3'  
.....: :  
query 3' UACGUGAGGUUGGGCAAAGGGU 5'  
query=miR1023e-3p, target=R03G\_04669, score=3, range=78-99, stran  
target 5' AUGCACUCCAACUCGCUUCCCA 3'  
.....: :  
query 3' UACGUGAGGUUGGGCAAAGGGU 5'  
query=miR1023e-3p, target=R03G\_03115, score=3.5, range=78-99,  
strand=-1  
target 5' AUGCACUUAACUCGCUUCCCA 3'  
.....: :  
query 3' UACGUGAGGUUGGGCAAAGGGU 5'  
query=miR1023e-3p, target=R03G\_00745, score=4, range=159-180,  
strand=-1  
target 5' AUGCACUCCAACUCGCUUCCUCA 3'  
.....: :  
query 3' UACGUGAGGUUGGGCAAAGGGU 5'  
query=miR6185, target=R03G\_13223, score=0, range=1206-1227, stran  
target 5' UACUGUUACCCGUGCUGCCAGA 3'  
.....: :  
query 3' AUGACAAUGGGCACGACGGUCU 5'  
query=miR6185, target=R03G\_04122, score=0, range=1206-1227, stran  
target 5' UACUGUUACCCGUGCUGCCAGA 3'  
.....: :  
query 3' AUGACAAUGGGCACGACGGUCU 5'  
query=miR6185, target=R03G\_13220, score=0, range=1206-1227, stran  
target 5' UACUGUUACCCGUGCUGCCAGA 3'  
.....: :  
query 3' AUGACAAUGGGCACGACGGUCU 5'  
query=miR6185, target=R03G\_04119, score=0, range=1206-1227, stran  
target 5' UACUGUUACCCGUGCUGCCAGA 3'  
.....: :  
query 3' AUGACAAUGGGCACGACGGUCU 5'  
query=miR6138, target=R03G\_16760, score=3.5, range=1638-1660, str  
target 5' AUUAUUUGUUA AUGCUCAAAGUG 3'  
.....: :  
query 3' AAUAAGAAGUUACGAGUUUCAU 5'  
query=miR172b-5p, target=R03G\_04776, score=4, range=713-731, stra  
target 5' CUGAAU-UUAAUGGUGGUGC 3'  
.....: :  
query 3' CACUAGAAUUACCACGACG 5'  
query=miR172b-5p, target=R03G\_06102, score=4, range=734-752, stra  
target 5' GUG-CUCUUA AUGGUGCUAC 3'





query 3' CUCUCGGUCCACGUUUAGU 5'  
query=miR530, target=R03G\_08655, score=0, range=4641-4660, strand  
target 5' GAGAGCCAGGUGCAUAAUCA 3'

query 3' CUCUCGGUCCACGUUUAGU 5'  
query=miR530, target=R03G\_07028, score=0, range=3765-3784, strand  
target 5' GAGAGCCAGGUGCAUAAUCA 3'

query 3' CUCUCGGUCCACGUUUAGU 5'  
query=miR530, target=R03G\_05520, score=0, range=1449-1468, strand  
target 5' GAGAGCCAGGUGCAUAAUCA 3'

query 3' CUCUCGGUCCACGUUUAGU 5'  
query=miR530, target=R03G\_10728, score=0, range=4560-4579, strand  
target 5' GAGAGCCAGGUGCAUAAUCA 3'

query 3' CUCUCGGUCCACGUUUAGU 5'  
query=miR530, target=R03G\_02816, score=0, range=579-598, strand=-  
target 5' GAGAGCCAGGUGCAUAAUCA 3'

query 3' CUCUCGGUCCACGUUUAGU 5'  
query=miR530, target=R03G\_12959, score=0, range=681-700, strand=-  
target 5' GAGAGCCAGGUGCAUAAUCA 3'

query 3' CUCUCGGUCCACGUUUAGU 5'  
query=miR530, target=R03G\_17383, score=0, range=1281-1300, strand  
target 5' GAGAGCCAGGUGCAUAAUCA 3'

query 3' CUCUCGGUCCACGUUUAGU 5'  
query=miR530, target=R03G\_12533, score=0, range=4122-4141, strand  
target 5' GAGAGCCAGGUGCAUAAUCA 3'

query 3' CUCUCGGUCCACGUUUAGU 5'  
query=miR530, target=R03G\_01965, score=0, range=4692-4711, strand  
target 5' GAGAGCCAGGUGCAUAAUCA 3'

query 3' CUCUCGGUCCACGUUUAGU 5'  
query=miR530, target=R03G\_15136, score=0, range=489-508, strand=-  
target 5' GAGAGCCAGGUGCAUAAUCA 3'

query 3' CUCUCGGUCCACGUUUAGU 5'  
query=miR530, target=R03G\_12651, score=0, range=489-508, strand=-  
target 5' GAGAGCCAGGUGCAUAAUCA 3'

query 3' CUCUCGGUCCACGUUUAGU 5'  
query=miR530, target=R03G\_02691, score=0, range=3228-3247, strand  
target 5' GAGAGCCAGGUGCAUAAUCA 3'  
.....  
query 3' CUCUCGGUCCACGUUUAGU 5'  
query=miR530, target=R03G\_17318, score=0, range=4782-4801, strand  
target 5' GAGAGCCAGGUGCAUAAUCA 3'  
.....  
query 3' CUCUCGGUCCACGUUUAGU 5'  
query=miR530, target=R03G\_04118, score=0, range=4782-4801, strand  
target 5' GAGAGCCAGGUGCAUAAUCA 3'  
.....  
query 3' CUCUCGGUCCACGUUUAGU 5'  
query=miR530, target=R03G\_17329, score=0, range=4119-4138, strand  
target 5' GAGAGCCAGGUGCAUAAUCA 3'  
.....  
query 3' CUCUCGGUCCACGUUUAGU 5'  
query=miR530, target=R03G\_07971, score=0, range=234-253, strand=-  
target 5' GAGAGCCAGGUGCAUAAUCA 3'  
.....  
query 3' CUCUCGGUCCACGUUUAGU 5'  
query=miR530, target=R03G\_02849, score=0, range=4800-4819, strand  
target 5' GAGAGCCAGGUGCAUAAUCA 3'  
.....  
query 3' CUCUCGGUCCACGUUUAGU 5'  
query=miR530, target=R03G\_15259, score=0, range=4800-4819, strand  
target 5' GAGAGCCAGGUGCAUAAUCA 3'  
.....  
query 3' CUCUCGGUCCACGUUUAGU 5'  
query=miR530, target=R03G\_11778, score=0, range=4800-4819, strand  
target 5' GAGAGCCAGGUGCAUAAUCA 3'  
.....  
query 3' CUCUCGGUCCACGUUUAGU 5'  
query=miR530, target=R03G\_05217, score=0, range=4800-4819, strand  
target 5' GAGAGCCAGGUGCAUAAUCA 3'  
.....  
query 3' CUCUCGGUCCACGUUUAGU 5'  
query=miR530, target=R03G\_07982, score=0, range=4800-4819, strand  
target 5' GAGAGCCAGGUGCAUAAUCA 3'  
.....  
query 3' CUCUCGGUCCACGUUUAGU 5'  
query=miR530, target=R03G\_00697, score=0, range=4800-4819, strand  
target 5' GAGAGCCAGGUGCAUAAUCA 3'  
.....  
query 3' CUCUCGGUCCACGUUUAGU 5'

query=miR530, target=R03G\_07035, score=0, range=4800-4819, strand  
target 5' GAGAGCCAGGUGCAUAAUCA 3'  
:~::~  
query 3' CUCUCGGUCCACGUUUAGU 5'  
query=miR530, target=R03G\_10535, score=0, range=2427-2446, strand  
target 5' GAGAGCCAGGUGCAUAAUCA 3'  
:~::~  
query 3' CUCUCGGUCCACGUUUAGU 5'  
query=miR530, target=R03G\_02851, score=0, range=4800-4819, strand  
target 5' GAGAGCCAGGUGCAUAAUCA 3'  
:~::~  
query 3' CUCUCGGUCCACGUUUAGU 5'  
query=miR530, target=R03G\_17274, score=1, range=4605-4624, strand  
target 5' GAGAACCAGGUGCAUAAUCA 3'  
:~:::  
query 3' CUCUCGGUCCACGUUUAGU 5'  
query=miR530, target=R03G\_05852, score=4, range=517-536, strand=1  
target 5' GAAAACCAGGUGCGUGAUCA 3'  
:~:::  
query 3' CUCUCGGUCCACGUUUAGU 5'  
query=miR530, target=R03G\_12181, score=4, range=1596-1615, strand  
target 5' GGGAGUCAGGAGCAUAAUCC 3'  
:~:::  
query 3' CUCUCGGUCCACGUUUAGU 5'  
query=miR530, target=R03G\_05918, score=4, range=1302-1321, strand  
target 5' GGGAGUCAGGAGCAUAAUCC 3'  
:~:::  
query 3' CUCUCGGUCCACGUUUAGU 5'  
query=miR530, target=R03G\_01102, score=4, range=1863-1882, strand  
target 5' CUGAGGCAGGUGCAUGAUCA 3'  
:~:::  
query 3' CUCUCGGUCCACGUUUAGU 5'  
query=miR530, target=R03G\_05951, score=4, range=816-835, strand=-  
target 5' GAAGUUCAGGUGCAUAGUCA 3'  
:~:::  
query 3' CUCUCGGUCCACGUUUAGU 5'  
query=miR530, target=R03G\_03890, score=4, range=396-416, strand=-  
target 5' GGAAGUGCAGGUGUAUAAUCA 3'  
:~:::  
query 3' CUCUCG-GUCCACGUUUAGU 5'  
query=miR6118-5p, target=R03G\_01147, score=0, range=212-231, stra  
target 5' UUUCCCAAGCACCCAUUCCA 3'  
:~::~  
query 3' AAAGGGUUCGUGGGUAAGGU 5'  
query=miR6118-5p, target=R03G\_01161, score=0, range=212-231, stra



query=miR6279, target=R03G\_14793, score=2, range=1245-1267, strand  
target 5' CGUCUGGCUGGAAGUCUUGUCCA 3'

:::::::::::::::::::::::::: :

query 3' GCAGACCGACCUUCAGAACAGAU 5'

query=miR6279, target=R03G\_17411, score=2, range=687-709, strand=  
target 5' CGUCUGGCUGGAAGUCUUGUCCA 3'

:::::::::::::::::::::::::: :

query 3' GCAGACCGACCUUCAGAACAGAU 5'

CDC-8219 know miRNA target PsRobot  
#miRNA Score mRNA Pairing target and miRNA

>miR1160.1 Score: 0.5 R03G\_17249

Query: 1 TTCCCTCTTTTAAAGCATGGCC 22

|:||||||||||||||||||

Sbjct: 774 AGGGGAGAAAAATTCGTACCGG 753

>miR1160.1 Score: 0.5 R03G\_14363

Query: 1 TTCCCTCTTTTAAAGCATGG-CC 22

||||||||||||||||||\*||

Sbjct: 807 AAGGGAGAAAAATTCGTACCAGG 785

>miR1160.1 Score: 0.5 R03G\_14547

Query: 1 TTCCCTCTTTTAAAGCATGG-CC 22

||||||||||||||||||\*||

Sbjct: 255 AAGGGAGAAAAATTCGTACCAGG 233

>miR1160.1 Score: 0.0 R03G\_13863

Query: 1 TTCCCTCTTTTAAAGCATGGCC 22

||||||||||||||||||

Sbjct: 549 AAGGGAGAAAAATTCGTACCGG 528

>miR1160.1 Score: 0.0 R03G\_13270

Query: 1 TTCCCTCTTTTAAAGCATGGCC 22

||||||||||||||||||

Sbjct: 849 AAGGGAGAAAAATTCGTACCGG 828

>miR1160.1 Score: 0.0 R03G\_11527

Query: 1 TTCCCTCTTTTAAAGCATGGCC 22

||||||||||||||||||

Sbjct: 255 AAGGGAGAAAAATTCGTACCGG 234

>miR1160.1 Score: 1.0 R03G\_10734

Query: 1 TTCCCTCTTTTAAAGCATGGCC 22

||||\*||||||||||||||

Sbjct: 255 AAGGTAGAAAAATTCGTACCGG 234

>miR1160.1 Score: 0.0 R03G\_10774

Query: 1 TTCCCTCTTTTAAAGCATGGCC 22

||||||||||||||||||

Sbjct: 816 AAGGGAGAAAAATTCGTACCGG 795

>miR1160.1 Score: 0.0 R03G\_10869

Query: 1 TTCCCTCTTTTAAAGCATGGCC 22

||||||||||||||||||

Sbjct: 255 AAGGGAGAAAAATTCGTACCGG 234  
>miR1160.1 Score: 0.0 R03G\_05935  
Query: 1 TTCCCTCTTTTAAAGCATGGCC 22  
|||||

Sbjct: 255 AAGGGAGAAAAATTCGTACCGG 234  
>miR1160.1 Score: 0.0 R03G\_04790  
Query: 1 TTCCCTCTTTTAAAGCATGGCC 22  
|||||

Sbjct: 255 AAGGGAGAAAAATTCGTACCGG 234  
>miR1160.1 Score: 0.0 R03G\_03593  
Query: 1 TTCCCTCTTTTAAAGCATGGCC 22  
|||||

Sbjct: 255 AAGGGAGAAAAATTCGTACCGG 234  
>miR1160.1 Score: 0.0 R03G\_03626  
Query: 1 TTCCCTCTTTTAAAGCATGGCC 22  
|||||

Sbjct: 255 AAGGGAGAAAAATTCGTACCGG 234  
>miR1160.1 Score: 0.0 R03G\_00678  
Query: 1 TTCCCTCTTTTAAAGCATGGCC 22  
|||||

Sbjct: 219 AAGGGAGAAAAATTCGTACCGG 198  
>miR1160.1 Score: 0.2 R03G\_01589  
Query: 1 TTCCCTCTTTTAAAGCATGGCC 22  
|||||:|

Sbjct: 255 AAGGGAGAAAAATTCGTACTGG 234  
>miR1160.1 Score: 1.0 R03G\_17459  
Query: 1 TTCCCTCTTTTAAAGCATGGCC 22  
||||\*|||||

Sbjct: 255 AAGGTAGAAAAATTCGTACCGG 234  
>miR1160.1 Score: 0.0 R03G\_17276  
Query: 1 TTCCCTCTTTTAAAGCATGGCC 22  
|||||

Sbjct: 939 AAGGGAGAAAAATTCGTACCGG 918  
>miR5565e Score: 0.0 R03G\_16107  
Query: 1 TATGGTCTAGATGTTGTCCGA 21  
|||||

Sbjct: 547 ATACCAGATCTACAACAGCCT 527  
>miR3711 Score: 2.2 R03G\_13432  
Query: 1 TAGCCAAGAAGGAGGTGCCT 20  
:|||||\*|:|||||

Sbjct: 567 GTCGGTCTTCTACTACGGA 548  
>miR3711 Score: 2.2 R03G\_11375  
Query: 1 TAGCCAAGAAGGAGGTGCCT 20  
||:|||||\*||:||||:

Sbjct: 1413 ATTGGTCTTCGTCTACGGG 1394

>miR3711 Score: 2.2 R03G\_00301  
Query: 1 TAGCCAAGAAGGAGGTGCCT 20  
:|:|||||||\*|||||||  
Sbjct: 1173 GTTGGTTCTTCTACCACGGA 1154

>miR1057 Score: 2.5 R03G\_12443  
Query: 1 TTCTAGGTTTAGCTGGGTGGT 21  
|||||:|\*|||||\*|:  
Sbjct: 603 AAGATCTAAAGCGACCCTTCG 583

>miR397a Score: 2.5 R03G\_11794  
Query: 1 TCATTGAGTGCAGCGTTGATG 21  
\*|||||||:|\*|||||\*|||  
Sbjct: 2483 TGTAACCTCATGCCGCAAGTAC 2463

>miR397a Score: 2.5 R03G\_03441  
Query: 1 TCATTGAGTGCAGCGTTG-ATG 21  
\*|||||||:|\*|||||\*|||  
Sbjct: 477 TGTAACCTGCGTTGCAACCTAC 456

>miR2645 Score: 1.0 R03G\_16799  
Query: 1 TTTCTTGAGATGAGCATTTT 20  
||\*|||||||  
Sbjct: 204 AAAAACTCTACTCGTAAAA 185

>miR2645 Score: 2.2 R03G\_16589  
Query: 1 TTTCTTGAGATGAGCATTTT 20  
|||:|\*|||||||:  
Sbjct: 815 AAAGGACTTGACTCGTAAAG 796

>miR2645 Score: 2.5 R03G\_16003  
Query: 1 TTTCTTGAGATGAGCATTTT 20  
\*|||||||\*::|:  
Sbjct: 231 CAAGAACTCTACTCGAGGAG 212

>miR2645 Score: 2.5 R03G\_15838  
Query: 1 TTTCTTGAGATGAGCATTTT 20  
||||:||||\*|||||:~\*  
Sbjct: 2319 AAAGAGCTCTAGTCGTAGGC 2300

>miR2645 Score: 0.0 R03G\_14350  
Query: 1 TTTCTTGAGATGAGCATTTT 20  
|||||||  
Sbjct: 204 AAAGAACTCTACTCGTAAAA 185

>miR2645 Score: 0.0 R03G\_14778  
Query: 1 TTTCTTGAGATGAGCATTTT 20  
|||||||  
Sbjct: 204 AAAGAACTCTACTCGTAAAA 185

>miR2645 Score: 2.5 R03G\_13980  
Query: 1 TTTCTTGAGATGAGCATTTT 20  
:||||||\*|\*|||||:|  
Sbjct: 1773 GAAGAACTGAACTCGTAGAA 1754

>miR2645 Score: 2.5 R03G\_14053

Query: 1 TTTCTTGAGATGAGCATTTT 20  
|||||||:|:||||\*||\*  
Sbjct: 138 AAAGAACTTTATTCGTCAAT 119  
>miR2645 Score: 0.0 R03G\_13222  
Query: 1 TTTCTTGAGATGAGCATTTT 20  
|||||||  
Sbjct: 156 AAAGAACTCTACTCGTAAAA 137  
>miR2645 Score: 0.0 R03G\_13225  
Query: 1 TTTCTTGAGATGAGCATTTT 20  
|||||||  
Sbjct: 204 AAAGAACTCTACTCGTAAAA 185  
>miR2645 Score: 0.0 R03G\_11967  
Query: 1 TTTCTTGAGATGAGCATTTT 20  
|||||||  
Sbjct: 204 AAAGAACTCTACTCGTAAAA 185  
>miR2645 Score: 2.5 R03G\_09407  
Query: 1 TTTCTTGAGATGAGCATTT-T 20  
:||||||:|:||||\*:\*|  
Sbjct: 672 GAAGAACTTTATTCGTATGTA 652  
>miR2645 Score: 2.5 R03G\_10170  
Query: 1 TTTCTTGAGATGAGCATTTT 20  
|||:||||||\*|||\*::  
Sbjct: 1492 AAAGGACTCTACACGTATGG 1473  
>miR2645 Score: 2.5 R03G\_06767  
Query: 1 TTTCTTGAGATGAGCATTTT 20  
|||||:||\*||||\*|||  
Sbjct: 331 AAAGAGCTCAACTCGGAAAA 312  
>miR2645 Score: 2.0 R03G\_07237  
Query: 1 TTTCTTGAGATGAGCATTTT 20  
|||||||:||||||\*|||  
Sbjct: 148 AAAGAACTTTACTCGCATAA 129  
>miR2645 Score: 2.5 R03G\_07548  
Query: 1 TTTCTTGAGATGAGCATTTT 20  
\*\*|||||||:|:|||||  
Sbjct: 525 TCAGAACTCTATTTGTAAAA 506  
>miR2645 Score: 2.0 R03G\_05639  
Query: 1 TTTCTTGAGATGAGCATTTT 20  
||\*\*|||||||  
Sbjct: 204 AACAACTCTACTCGTAAAA 185  
>miR2645 Score: 2.5 R03G\_05663  
Query: 1 TTTCTTGAGATGAGCATTTT 20  
\*\*|||||||:|||||:|  
Sbjct: 144 CCAGAACTCTATTCGTAGGA 125  
>miR2645 Score: 2.5 R03G\_05056  
Query: 1 TTTCTTGAGATGAGCATTTT 20



||||||\*||||||\*::|  
Sbjct: 612 AAAGAACACTACTCGTCGGA 593  
>miR2645 Score: 2.5 R03G\_05056  
Query: 1 TTTCTTGAGATGAGCATTTT 20  
||||||\*||||||\*\*||  
Sbjct: 294 AAAGAACACTACTCGTCTAA 275  
>miR2645 Score: 2.2 R03G\_05469  
Query: 1 TTTCTTGAGATGAGCATTTT 20  
:||||||\*|||||:\*||  
Sbjct: 804 GAAGAACTCGACTCGTGCAA 785  
>miR2645 Score: 0.0 R03G\_03991  
Query: 1 TTTCTTGAGATGAGCATTTT 20  
|||||||  
Sbjct: 204 AAAGAACTCTACTCGTAAAA 185  
>miR2645 Score: 0.0 R03G\_17015  
Query: 1 TTTCTTGAGATGAGCATTTT 20  
|||||||  
Sbjct: 204 AAAGAACTCTACTCGTAAAA 185  
>miR3946 Score: 1.0 R03G\_17023  
Query: 1 TGTAGAGAAAAGAGAGCATG 22  
|||||||\*|||||||  
Sbjct: 1246 ACATCTCTTTTCTCCCTCGTAC 1225  
>miR8748 Score: 1.0 R03G\_17257  
Query: 1 TGATGGTGATGATAATAATGAAT 23  
|||||||\*|||||||  
Sbjct: 2127 ACTACCACTACTACTATTACTTA 2105  
>miR8748 Score: 1.0 R03G\_16749  
Query: 1 TGATGGTGATGATAATAATGAAT 23  
|||||||\*|||||||  
Sbjct: 2211 ACTACCACTACTACTATTACTTA 2189  
>miR8748 Score: 2.5 R03G\_16764  
Query: 1 TGATGGTGATGATAATAATGAAT 23  
:|||||:||||\*||||:\*||  
Sbjct: 722 GCTACCATTACTACTATTG-TTA 701  
>miR8748 Score: 1.0 R03G\_16136  
Query: 1 TGATGGTGATGATAATAATGAAT 23  
|||||||\*|||||||  
Sbjct: 2127 ACTACCACTACTACTATTACTTA 2105  
>miR8748 Score: 1.0 R03G\_15889  
Query: 1 TGATGGTGATGATAATAATGAAT 23  
|||||||\*|||||||  
Sbjct: 2127 ACTACCACTACTACTATTACTTA 2105  
>miR8748 Score: 1.0 R03G\_13145  
Query: 1 TGATGGTGATGATAATAATGAAT 23  
|||||||\*|||||||

Sbjct: 2211 ACTACCACTACTACTATTACTTA 2189  
>miR8748 Score: 1.0 R03G\_13273  
Query: 1 TGATGGTGATGATAATAATGAAT 23  
|||||\*|||||  
Sbjct: 2211 ACTACCACTACTACTATTACTTA 2189  
>miR8748 Score: 1.0 R03G\_10735  
Query: 1 TGATGGTGATGATAATAATGAAT 23  
|||||\*|||||  
Sbjct: 1656 ACTACCACTACTACTATTACTTA 1634  
>miR8748 Score: 2.2 R03G\_11036  
Query: 1 TGATGGTGATGATAATAATGAAT 23  
::|||:|||||:|||||\*||  
Sbjct: 1069 GTTACTACTACTGTTATTAC-TA 1048  
>miR8748 Score: 1.0 R03G\_09516  
Query: 1 TGATGGTGATGATAATAATGAAT 23  
|||||:|||||\*|||  
Sbjct: 262 ACTACTACTACTATTATTA-TTA 241  
>miR8748 Score: 1.0 R03G\_10040  
Query: 1 TGATGGTGATGATAATAATGAAT 23  
|||||\*|||||  
Sbjct: 801 ACTACCACTACTACTATTACTTA 779  
>miR8748 Score: 1.0 R03G\_10217  
Query: 1 TGATGGTGATGATAATAATGAAT 23  
|||||\*|||||  
Sbjct: 2211 ACTACCACTACTACTATTACTTA 2189  
>miR8748 Score: 2.0 R03G\_08929  
Query: 1 TGATGGTGATGATAATAATGAAT 23  
|||||\*:|||||\*|||  
Sbjct: 30 ACTACCTTTACTATTATTA-TTA 9  
>miR8748 Score: 2.5 R03G\_08974  
Query: 1 TGATGGTGATGATAATAATGAAT 23  
:|||||\*|||||:||\*|  
Sbjct: 176 GCTACCATCACTATTATTGCTAA 154  
>miR8748 Score: 1.0 R03G\_09183  
Query: 1 TGATGGTGATGATAATAATGAAT 23  
|||||\*|||||  
Sbjct: 1344 ACTACCACTACTACTATTACTTA 1322  
>miR8748 Score: 2.5 R03G\_07191  
Query: 1 TGATGGTGATGATAATAATGAAT 23  
|||||\*||\*||  
Sbjct: 303 ACTACCACTACTATTACGAGATA 281  
>miR8748 Score: 1.0 R03G\_07697  
Query: 1 TGATGGTGATGATAATAATGAAT 23  
|||||\*|||||  
Sbjct: 537 ACTACCACTACTACTATTACTTA 515

>miR8748 Score: 0.0 R03G\_04592  
Query: 1 TGATGGTGATGATAATAATGAAT 23  
|||||  
Sbjct: 1383 ACTACCACTACTATTACTTA 1361

>miR8748 Score: 1.0 R03G\_04681  
Query: 1 TGATGGTGATGATAATAATGAAT 23  
|||||\*|||  
Sbjct: 801 ACTACCACTACTACTATTACTTA 779

>miR8748 Score: 2.5 R03G\_04843  
Query: 1 TGATGGTGATGATAATAATGAAT 23  
|:|:|:|:|:|\*|||  
Sbjct: 368 ATTATCATTATTATTATTA-TTA 347

>miR8748 Score: 1.0 R03G\_05424  
Query: 1 TGATGGTGATGATAATAATGAAT 23  
|||||\*|||  
Sbjct: 2127 ACTACCACTACTACTATTACTTA 2105

>miR8748 Score: 2.2 R03G\_02397  
Query: 1 TGATGGTGATGATAATAATGAAT 23  
||||:|||||\*||\*|||  
Sbjct: 357 ACTACTACTACTATCATT-TTTA 336

>miR8748 Score: 2.0 R03G\_02763  
Query: 1 TGATGGTGATGATAATAATGAAT 23  
|||||:|:|:|\*|||  
Sbjct: 865 ACTACCGTTATTATTATTA-TTA 844

>miR8748 Score: 1.5 R03G\_00289  
Query: 1 TGATGGTGATGATAATAATGAAT 23  
|||||\*|||\*|||  
Sbjct: 945 ACTACCACTACTACTATTAC-TA 924

>miR8748 Score: 2.5 R03G\_01410  
Query: 1 TGATGGTGATGATAATAATGAAT 23  
|||||:|||||\*|||\*|||  
Sbjct: 459 ACTACTACTACTACTATTTC-TA 438

>miR8748 Score: 2.2 R03G\_01780  
Query: 1 TGATGGTGATGATAATAATGAAT 23  
|||||:|||||:||||\*|:\*|||  
Sbjct: 1267 ACTACCGCTACTGTTAT-ATCTA 1246

>miR8748 Score: 1.0 R03G\_17351  
Query: 1 TGATGGTGATGATAATAATGAAT 23  
|||||\*|||  
Sbjct: 939 ACTACCACTACTACTATTACTTA 917

>miR408-3p Score: 2.5 R03G\_12917  
Query: 1 ATGCACTGCCTCTCCCTGG 20  
\*|||||:|||||:|\*  
Sbjct: 370 CACGTGGTGGAGAAGGGGTA 351

>miR408-3p Score: 2.5 R03G\_04352

Query: 1 ATGCACTGCCTCTTCCCTGG 20  
\*:|||\*|||||||\*|  
Sbjct: 706 GGCGTTACGGAGAAGGGAAC 687  
>miR395b Score: 2.5 R03G\_10645  
Query: 1 CTGAAGTGTTTGGGGGGACT 20  
\*||||\*||||:|||||  
Sbjct: 1173 TACTTCCCAAACCTCCCTGA 1154  
>miR395b Score: 2.0 R03G\_07684  
Query: 1 CTGAAGTGTTTGGGGGGACT 20  
||||:|:|||||:|\*||  
Sbjct: 391 GACTTTATAAACCTCCAGA 372  
>miR395b Score: 2.5 R03G\_06340  
Query: 1 CTGAAGTGTTTGGGGGGACT 20  
\*||||||\*||||||:|\*|  
Sbjct: 433 CACTTCACTAACCCCTTTA 414  
>miR395b Score: 2.0 R03G\_05297  
Query: 1 CTGAAGTGTTTGGGGGGACT 20  
||||\*|\*|||||||  
Sbjct: 489 GACTCCTCAAACCCCTGA 470  
>miR5769 Score: 2.5 R03G\_13148  
Query: 1 TGGGGAACTGGAAGACGCGA 20  
|||\*|\*|||||||\*||  
Sbjct: 1463 ACCGCCTGACCTTCTGCTCT 1444  
>miR5769 Score: 2.2 R03G\_11767  
Query: 1 TGGGGAACTGGAAGACGCGA 20  
:\*|:|||||||\*||  
Sbjct: 153 GACTCTTGACCTTCTGC-CT 135  
>miR5769 Score: 0.0 R03G\_08042  
Query: 1 TGGGGAACTGGAAGACGCGA 20  
|||||||  
Sbjct: 1262 ACCCCTTGACCTTCTGCGCT 1243  
>miR5769 Score: 2.2 R03G\_17150  
Query: 1 TGGGGAACTGGAAGACGCGA 20  
:\*|:|||||||\*||  
Sbjct: 999 GACTCTTGACCTTCTGC-CT 981  
>miR827 Score: 2.5 R03G\_16161  
Query: 1 TTAGATGACCATCAACAAAT 20  
|||:|||||||\*|||  
Sbjct: 694 AATTTACTGGTAGTAATTTA 675  
>miR827 Score: 2.5 R03G\_15356  
Query: 1 TTAGATGACCATCAACAAAT 20  
|||||||\*|:|\*|||  
Sbjct: 706 AATCTACTGTTGGTGGTTTA 687  
>miR827 Score: 2.2 R03G\_05422  
Query: 1 TTAGATGACCATCAACAAAT 20

||\*|||||||:|||||\*:  
Sbjct: 352 AAGCTACTGGTGGTTGTTTCG 333  
>miR171a-3p Score: 2.5 R03G\_16320  
Query: 1 TGATTGAGCCGCGCCAAT-AT 20  
\*|||||||\*||:|||||\*||  
Sbjct: 366 CCTAACTCGACGTGGTTAGTA 346  
>miR8123-3p Score: 1.5 R03G\_17202  
Query: 1 TTGTCGCCATTGGTCCAAGTC 21  
||:|\*|||||||  
Sbjct: 503 AATAACGGTAACCAGGTTTCAG 483  
>miR8123-3p Score: 0.0 R03G\_16829  
Query: 1 TTGTCGCCATTGGTCCAAGTC 21  
|||||||  
Sbjct: 503 AACAGCGGTAACCAGGTTTCAG 483  
>miR8123-3p Score: 0.0 R03G\_16904  
Query: 1 TTGTCGCCATTGGTCCAAGTC 21  
|||||||  
Sbjct: 503 AACAGCGGTAACCAGGTTTCAG 483  
>miR8123-3p Score: 0.5 R03G\_16721  
Query: 1 TTGTCGCCATTGGTCCAAGTC 21  
||:|||||||  
Sbjct: 461 AATAGCGGTAACCAGGTTTCAG 441  
>miR8123-3p Score: 0.8 R03G\_16703  
Query: 1 TTGTCGCCATTGGTCCAAGTC 21  
||:|||||||:|  
Sbjct: 503 AATAGCGGTAACCAGGTTTCAG 483  
>miR8123-3p Score: 0.0 R03G\_16428  
Query: 1 TTGTCGCCATTGGTCCAAGTC 21  
|||||||  
Sbjct: 140 AACAGCGGTAACCAGGTTTCAG 120  
>miR8123-3p Score: 1.0 R03G\_13734  
Query: 1 TTGTCGCCATTGGTCCAAGTC 21  
||:|||||||:|||||||  
Sbjct: 503 AATAGCGGTAATCAGGTTTCAG 483  
>miR8123-3p Score: 1.0 R03G\_12060  
Query: 1 TTGTCGCCATTGGTCCAAGTC 21  
||:|||||||:|||||||  
Sbjct: 140 AATAGCGGTAATCAGGTTTCAG 120  
>miR8123-3p Score: 0.5 R03G\_11411  
Query: 1 TTGTCGCCATTGGTCCAAGTC 21  
||:|||||||:|||||||  
Sbjct: 140 AATAGCGGTAACCAGGTTTCAG 120  
>miR8123-3p Score: 0.5 R03G\_05945  
Query: 1 TTGTCGCCATTGGTCCAAGTC 21  
||:|||||||:|||||||

Sbjct: 140 AATAGCGGTAACCAGGTTTCAG 120  
>miR8123-3p Score: 1.5 R03G\_03594  
Query: 1 TTGTCGCCATTGGTCCAAGTC 21  
||:\*|||||||||||||||  
Sbjct: 140 AATAACGGTAACCAGGTTTCAG 120  
>miR8123-3p Score: 1.5 R03G\_00676  
Query: 1 TTGTCGCCATTGGTCCAAGTC 21  
||:|||||||||\*|||||||  
Sbjct: 503 AATAGCGGTAACGAGGTTTCAG 483  
>miR8123-3p Score: 1.0 R03G\_02224  
Query: 1 TTGTCGCCATTGGTCCAAGTC 21  
||:|||||||||:|||||||  
Sbjct: 140 AATAGCGGTAATCAGGTTTCAG 120  
>miR8123-3p Score: 1.0 R03G\_17154  
Query: 1 TTGTCGCCATTGGTCCAAGTC 21  
||:|||||||||:|||||||  
Sbjct: 140 AATAGCGGTAATCAGGTTTCAG 120  
>miR7823 Score: 2.5 R03G\_17163  
Query: 1 TTGCATGCTGATCTTAGAT 19  
|||||||||\*||\*||\*|  
Sbjct: 2356 AACGTACGACAAGTATCGA 2338  
>miR7823 Score: 2.5 R03G\_15896  
Query: 1 TTGCATGCTGATCTTAGAT 19  
|||||||||\*||\*||\*|  
Sbjct: 2542 AACGTACGACAAGTATCGA 2524  
>miR7823 Score: 2.5 R03G\_08106  
Query: 1 TTGCATGCTGATCTTAGAT 19  
|||||||||\*||\*||\*|  
Sbjct: 2476 AACGTACGACAAGTATCGA 2458  
>miR7823 Score: 2.5 R03G\_07541  
Query: 1 TTGCATGCTGATCTTAGAT 19  
||||\*||||||:||\*|||  
Sbjct: 228 AACGAACGACTGGAACCTA 210  
>miR7823 Score: 2.5 R03G\_05963  
Query: 1 TTGCATGCTGATCTTAGAT 19  
|||||||||\*||\*||\*|  
Sbjct: 2542 AACGTACGACAAGTATCGA 2524  
>miR7823 Score: 2.0 R03G\_06546  
Query: 1 TTGCATGCTGATCTTAGAT 19  
||||\*||||||:||||\*|  
Sbjct: 225 AACGAACGACTGGAATCCA 207  
>miR7823 Score: 2.5 R03G\_04341  
Query: 1 TTGCATGCTGATCTTAGAT 19  
||||||||||||:|:\*||\*|  
Sbjct: 1912 AACGTACGACTGGGTTTC-A 1895

>miR7823 Score: 2.5 R03G\_04372  
Query: 1 TTGCATGCTGATCTTAGAT 19  
|||||\*||||\*|||\*  
Sbjct: 666 AACGTACAAGTAGCATCTC 648

>miR7823 Score: 2.0 R03G\_04655  
Query: 1 TTGCATGCTGATCTTAGAT 19  
\*|:|||||||\*|||  
Sbjct: 820 TATGTACGACTAGAACTA 802

>miR7823 Score: 2.5 R03G\_02711  
Query: 1 TTGCATGCTGATCTTAGAT 19  
|||||||\*||\*||\*|  
Sbjct: 2476 AACGTACGACAAGTATCAA 2458

>miR7823 Score: 2.5 R03G\_00264  
Query: 1 TTGCATGCTGATCTTAGAT 19  
|||\*|||||:||\*|||  
Sbjct: 396 AACGAACGACTGGAACCTA 378

>miR7823 Score: 2.2 R03G\_00505  
Query: 1 TTGCATGCTGATCTTAGAT 19  
\*|:|||||||:|:|:  
Sbjct: 26 CATGTACGACTAGAGTTTG 8

>miR7823 Score: 2.5 R03G\_01867  
Query: 1 TTGCATGCTGATCTTAGAT 19  
\*|||||||\*||\*||  
Sbjct: 277 CACGTACGACTAGCATGTA 259

>miR7495a Score: 2.5 R03G\_16104  
Query: 1 TTCTTGAGTGCCTCCTTCA 20  
|||||:|:~:|||||||  
Sbjct: 67 AAGAACGTTTTGGAGGAAGT 48

>miR7495a Score: 2.5 R03G\_14467  
Query: 1 TTCTTGAGTGCCTCCTTCA 20  
||||:||||\*||\*|||||  
Sbjct: 504 AAGAGCATCTCGGTGGAAGT 485

>miR7495a Score: 2.5 R03G\_14722  
Query: 1 TTCTTGAGTGCCTCCTTCA 20  
||||:||||\*||\*|||||  
Sbjct: 975 AAGAGCATCTCGGTGGAAGT 956

>miR7495a Score: 2.5 R03G\_13903  
Query: 1 TTCTTGAGTGCCTCCTTCA 20  
||||:||||\*||\*|||||  
Sbjct: 975 AAGAGCATCTCGGTGGAAGT 956

>miR7495a Score: 2.5 R03G\_13664  
Query: 1 TTCTTGAGTGCCTCCTTCA 20  
||||:||||\*||\*|||||  
Sbjct: 975 AAGAGCATCTCGGTGGAAGT 956

>miR7495a Score: 2.5 R03G\_13672

Query: 1 TTCTTGTAGTGCCTCCTTCA 20  
||||:||||\*|||\*|||||  
Sbjct: 975 AAGAGCATCTCGGTGGAAGT 956  
>miR7495a Score: 2.5 R03G\_12139  
Query: 1 TTCTTGTAGTGCCTCCTTCA 20  
||||:||||\*|||\*|||||  
Sbjct: 348 AAGAGCATCTCGGTGGAAGT 329  
>miR7495a Score: 2.5 R03G\_11171  
Query: 1 TTCTTGTAGTGCCTCCTTCA 20  
|||||||:|:|\*|||\*|||\*  
Sbjct: 510 AAGAACATTGTGGAGGA-GA 492  
>miR7495a Score: 2.5 R03G\_11486  
Query: 1 TTCTTGTAGTGCCTCCTTCA 20  
||||:||||\*|||\*|||||  
Sbjct: 684 AAGAGCATCTCGGTGGAAGT 665  
>miR7495a Score: 2.5 R03G\_11567  
Query: 1 TTCTTGTAGTGCCTCCTTCA 20  
||||:||||\*|||\*|||||  
Sbjct: 1632 AAGAGCATCTCGGTGGAAGT 1613  
>miR7495a Score: 2.5 R03G\_10644  
Query: 1 TTCTTGTAGTGCCTCCTTCA 20  
||||:||||\*|||\*|||||  
Sbjct: 360 AAGAGCATCTCGGTGGAAGT 341  
>miR7495a Score: 2.0 R03G\_09419  
Query: 1 TTCTTGTAGTGCCTCCTTCA 20  
|||||||\*|||\*|||||  
Sbjct: 795 AAGAACATCTCGGTGGAAGT 776  
>miR7495a Score: 2.0 R03G\_08375  
Query: 1 TTCTTGTAGTGCCTCCTTCA 20  
|\*|||||:|||||||\*|  
Sbjct: 1014 ATGAACATTACGGAGGAAAT 995  
>miR7495a Score: 2.5 R03G\_08906  
Query: 1 TTCTTGTAGTGCCTCCTTCA 20  
||||:||||\*|||\*|||||  
Sbjct: 975 AAGAGCATCTCGGTGGAAGT 956  
>miR7495a Score: 2.5 R03G\_07788  
Query: 1 TTCTTGTAGTGCCTCCTTCA 20  
||||:||||\*|||\*|||||  
Sbjct: 924 AAGAGCATCTCGGTGGAAGT 905  
>miR7495a Score: 2.5 R03G\_05535  
Query: 1 TTCTTGTAGTGCCTCCTTCA 20  
||||:||||\*|||\*|||||  
Sbjct: 360 AAGAGCATCTCGGTGGAAGT 341  
>miR7495a Score: 2.5 R03G\_04841  
Query: 1 TTCTTGTAGTGCCTCCTTCA 20



```
::*|||||||*  
Sbjct: 922 GGAAACATCACGGAGGAGGA 903  
>miR7495a Score: 2.0 R03G_05161  
Query: 1 TTCTTGAGTGCCTCCTTCA 20  
|||||||*:  
Sbjct: 2095 AAGAACATAGCGGAGGAAGG 2076  
>miR7495a Score: 2.5 R03G_05181  
Query: 1 TTCTTGAGTGCCTCCTTCA 20  
|||:||||*||*|||  
Sbjct: 975 AAGAGCATCTCGGTGGAAGT 956  
>miR7495a Score: 2.5 R03G_05194  
Query: 1 TTCTTGAGTGCCTCCTTCA 20  
|||:||||*||*|||  
Sbjct: 975 AAGAGCATCTCGGTGGAAGT 956  
>miR7495a Score: 2.5 R03G_05303  
Query: 1 TTCTTGAGTGCCTCCTTCA 20  
|||:||||*||*|||  
Sbjct: 975 AAGAGCATCTCGGTGGAAGT 956  
>miR7495a Score: 2.5 R03G_02354  
Query: 1 TTCTTGAGTGCCTCCTTCA 20  
|||:||||*||*|||  
Sbjct: 975 AAGAGCATCTCGGTGGAAGT 956  
>miR7495a Score: 2.5 R03G_03896  
Query: 1 TTCTTGAGTGCCTCCTTCA 20  
||||*||*||||||*||  
Sbjct: 1233 AAGAAAAACACGGAGGA-GT 1215  
>miR7495a Score: 2.5 R03G_04104  
Query: 1 TTCTTGAGTGCCTCCTTCA 20  
|||:||||*||*|||  
Sbjct: 672 AAGAGCATCTCGGCGGAAGT 653  
>miR7495a Score: 2.5 R03G_04110  
Query: 1 TTCTTGAGTGCCTCCTTCA 20  
|||:||||*||*|||  
Sbjct: 672 AAGAGCATCTCGGTGGAAGT 653  
>miR7495a Score: 2.5 R03G_00779  
Query: 1 TTCTTGAGTGCCTCCTTCA 20  
||||*||||*||||*||  
Sbjct: 2835 AAGAAGATCAGGGAGGA-GT 2817  
>miR7495a Score: 2.5 R03G_01518  
Query: 1 TTCTTGAGTGCCTCCTTCA 20  
|||:||||*||*|||  
Sbjct: 348 AAGAGCATCTCGGTGGAAGT 329  
>miR7495a Score: 2.5 R03G_01528  
Query: 1 TTCTTGAGTGCCTCCTTCA 20  
|||:||||*||*|||
```

Sbjct: 543 AAGAGCATCTCGGTGGAAGT 524  
>miR7495a Score: 2.5 R03G\_01838  
Query: 1 TTCTTGTAGTGCCTCCTTCA 20  
|||||\*||||||\*|||\*|  
Sbjct: 486 AAGAACTTCACGGAAGAA-T 468  
>miR7495a Score: 2.5 R03G\_01923  
Query: 1 TTCTTGTAGTGCCTCCTTCA 20  
||||:||||\*|||\*|||||  
Sbjct: 924 AAGAGCATCTCGGTGGAAGT 905  
>miR7495a Score: 2.0 R03G\_02132  
Query: 1 TTCTTGTAGTGCCTCCTTCA 20  
||||\*||\*|||||||  
Sbjct: 175 AAGAAAAGCACGGAGGAAGT 156  
>miR7495a Score: 2.5 R03G\_02179  
Query: 1 TTCTTGTAGTGCCTCCTTCA 20  
||||\*|||:|||||||  
Sbjct: 3597 AAGACCATTCCGGAGGAAGT 3578  
>miR9742 Score: 0.0 R03G\_15585  
Query: 1 TGTATTGTTTGTCTGTGAGTA 23  
|||||||  
Sbjct: 2674 ACATAACAAACAAAGACACTCAT 2652  
>miR9742 Score: 0.0 R03G\_15250  
Query: 1 TGTATTGTTTGTCTGTGAGTA 23  
|||||||  
Sbjct: 2674 ACATAACAAACAAAGACACTCAT 2652  
>miR9742 Score: 0.0 R03G\_14355  
Query: 1 TGTATTGTTTGTCTGTGAGTA 23  
|||||||  
Sbjct: 925 ACATAACAAACAAAGACACTCAT 903  
>miR9742 Score: 0.0 R03G\_13867  
Query: 1 TGTATTGTTTGTCTGTGAGTA 23  
|||||||  
Sbjct: 2635 ACATAACAAACAAAGACACTCAT 2613  
>miR9742 Score: 0.0 R03G\_13920  
Query: 1 TGTATTGTTTGTCTGTGAGTA 23  
|||||||  
Sbjct: 2719 ACATAACAAACAAAGACACTCAT 2697  
>miR9742 Score: 0.0 R03G\_13749  
Query: 1 TGTATTGTTTGTCTGTGAGTA 23  
|||||||  
Sbjct: 1282 ACATAACAAACAAAGACACTCAT 1260  
>miR9742 Score: 0.0 R03G\_10558  
Query: 1 TGTATTGTTTGTCTGTGAGTA 23  
|||||||  
Sbjct: 472 ACATAACAAACAAAGACACTCAT 450

>miR9742 Score: 2.5 R03G\_09555  
Query: 1 TGTATTGTTTGTCTGTGAGTA 23  
||||||\*|||:||||||\*|  
Sbjct: 1308 ACATAACCGACAGAGACTC-T 1287

>miR9742 Score: 0.0 R03G\_09965  
Query: 1 TGTATTGTTTGTCTGTGAGTA 23  
|||||||  
Sbjct: 2719 ACATAACAAACAAAGACTCAT 2697

>miR9742 Score: 2.2 R03G\_10158  
Query: 1 TGTATTGTTTGTCTGTGAGTA 23  
|||||\*|||||:||||\*|||  
Sbjct: 72 ACATAAAAAACAGAGAC-TTCAT 51

>miR9742 Score: 0.0 R03G\_05619  
Query: 1 TGTATTGTTTGTCTGTGAGTA 23  
|||||||  
Sbjct: 862 ACATAACAAACAAAGACTCAT 840

>miR9742 Score: 0.0 R03G\_06427  
Query: 1 TGTATTGTTTGTCTGTGAGTA 23  
|||||||  
Sbjct: 2311 ACATAACAAACAAAGACTCAT 2289

>miR9742 Score: 0.0 R03G\_06428  
Query: 1 TGTATTGTTTGTCTGTGAGTA 23  
|||||||  
Sbjct: 1813 ACATAACAAACAAAGACTCAT 1791

>miR9742 Score: 0.0 R03G\_06442  
Query: 1 TGTATTGTTTGTCTGTGAGTA 23  
|||||||  
Sbjct: 3376 ACATAACAAACAAAGACTCAT 3354

>miR9742 Score: 2.5 R03G\_06545  
Query: 1 TGTATTGTTTGTCTGTGAGTA 23  
\*:|||||:||||||\*|\*|||  
Sbjct: 957 TTATAACAGACAAAGACTC-CAT 936

>miR9742 Score: 0.0 R03G\_05272  
Query: 1 TGTATTGTTTGTCTGTGAGTA 23  
|||||||  
Sbjct: 2719 ACATAACAAACAAAGACTCAT 2697

>miR9742 Score: 2.0 R03G\_05368  
Query: 1 TGTATTGTTTGTCTGTGAGTA 23  
|||||||\*||\*|\*||  
Sbjct: 1939 ACATAACAAACAAATACAATAAT 1917

>miR9742 Score: 2.5 R03G\_02393  
Query: 1 TGTATTGTTTGTCTGTG-AGTA 23  
|||:||||||\*||||\*|\*||  
Sbjct: 383 ACATGACAAACAACGACACGTAAT 360

>miR9742 Score: 0.0 R03G\_02691

Query: 1 TGTATTGTTTGTCTGTGAGTA 23  
|||||  
Sbjct: 6208 ACATAACAAACAAAGACTCAT 6186  
>miR9742 Score: 0.0 R03G\_02959  
Query: 1 TGTATTGTTTGTCTGTGAGTA 23  
|||||  
Sbjct: 2719 ACATAACAAACAAAGACTCAT 2697  
>miR9742 Score: 0.0 R03G\_03547  
Query: 1 TGTATTGTTTGTCTGTGAGTA 23  
|||||  
Sbjct: 2719 ACATAACAAACAAAGACTCAT 2697  
>miR9742 Score: 0.0 R03G\_04114  
Query: 1 TGTATTGTTTGTCTGTGAGTA 23  
|||||  
Sbjct: 2719 ACATAACAAACAAAGACTCAT 2697  
>miR9742 Score: 0.0 R03G\_00306  
Query: 1 TGTATTGTTTGTCTGTGAGTA 23  
|||||  
Sbjct: 1168 ACATAACAAACAAAGACTCAT 1146  
>miR9742 Score: 0.0 R03G\_01613  
Query: 1 TGTATTGTTTGTCTGTGAGTA 23  
|||||  
Sbjct: 970 ACATAACAAACAAAGACTCAT 948  
>miR9742 Score: 2.0 R03G\_02099  
Query: 1 TGTATTGTTTGTCTGTGA-GTA 23  
|||||:|:|||||\*|\*|||  
Sbjct: 1855 ACATAACGAATAAAGACAGTCCAT 1832  
>miR9742 Score: 0.0 R03G\_02221  
Query: 1 TGTATTGTTTGTCTGTGAGTA 23  
|||||  
Sbjct: 2641 ACATAACAAACAAAGACTCAT 2619  
>miR9742 Score: 0.0 R03G\_17371  
Query: 1 TGTATTGTTTGTCTGTGAGTA 23  
|||||  
Sbjct: 2674 ACATAACAAACAAAGACTCAT 2652  
>miR9742 Score: 0.0 R03G\_17326  
Query: 1 TGTATTGTTTGTCTGTGAGTA 23  
|||||  
Sbjct: 2551 ACATAACAAACAAAGACTCAT 2529  
>miR823 Score: 2.5 R03G\_16350  
Query: 1 TGTGGTGATCAAATGAAGAT 20  
|||:|\*|\*|||:|||||  
Sbjct: 259 ACATTACCAGTTTATTTCTA 240  
>miR823 Score: 2.5 R03G\_15947  
Query: 1 TGTGGTGATCAAATGAAGAT 20



Sbjct: 361 ACACTACTAGTTTACT-CGA 343  
>miR823 Score: 2.5 R03G\_05436  
Query: 1 TGTGGTGATCAAATGAAGAT 20  
|||::||\*|||||:|||||  
Sbjct: 259 ACATTACCAGTTTATTTCTA 240  
>miR823 Score: 2.5 R03G\_02716  
Query: 1 TGTGGTGATCAAATGAAGAT 20  
|||::||\*|||||:|||||  
Sbjct: 259 ACATTACCAGTTTATTTCTA 240  
>miR823 Score: 2.5 R03G\_02750  
Query: 1 TGTGGTGATCAAATGAAGAT 20  
|\*|||||||:|\*|||  
Sbjct: 1036 AAACCACTAGTTTATT-CTA 1018  
>miR823 Score: 2.5 R03G\_03273  
Query: 1 TGTGGTGATCAAATGAAGAT 20  
|:|:\*|||||||\*||  
Sbjct: 114 ATATGACTAGTTTACTT-TA 96  
>miR823 Score: 2.5 R03G\_01418  
Query: 1 TGTGGTGATCAAATGAAGAT 20  
|:|:|||||||:|\*|||  
Sbjct: 253 AACTACTAGTTTGCT-CTA 235  
>miR823 Score: 2.5 R03G\_01610  
Query: 1 TGTGGTGATCAAATGAAGAT 20  
|||::||\*|||||:|||||  
Sbjct: 259 ACATTACCAGTTTATTTCTA 240  
>miR7699-3p Score: 2.2 R03G\_13470  
Query: 1 TGTAAATACCATCATTAATGC 22  
::|||||\*|||||||\*|  
Sbjct: 1120 GTATTTATCGTAGTAATTTA-G 1100  
>miR7699-3p Score: 0.0 R03G\_17377  
Query: 1 TGTAAATACCATCATTAATGC 22  
|||||||  
Sbjct: 58 ACATTTATGGTAGTAATTTACG 37  
>miR4348c Score: 2.5 R03G\_11064  
Query: 1 TGTAAACCTTGAAGAGACCA 22  
\*:|||||||\*||\*||  
Sbjct: 1278 CTAATTTGGAACCTTCCCTCGT 1257  
>miR4348c Score: 2.5 R03G\_09637  
Query: 1 TGTAAACCTTGAAGAGACCA 22  
|||:|\*|||||:||||\*|||  
Sbjct: 966 ACAGTTCGGAACCTTCTCCGGT 945  
>miR1870-5p Score: 0.0 R03G\_16818  
Query: 1 TTGCTGAATGGACCAGTGGCAT 22  
|||||||  
Sbjct: 1426 AACGACTTACCTGGTCACCGTA 1405

>miR1870-5p Score: 0.0 R03G\_16797  
Query: 1 TTGCTGAATGGACCAGTGGCAT 22  
|||||  
Sbjct: 685 AACGACTTACCTGGTCACCGTA 664

>miR1870-5p Score: 2.0 R03G\_16800  
Query: 1 TTGCTGAATGGACCAGTGGCAT 22  
|||||\*|:|||||  
Sbjct: 1684 AACGACTCGCTTGGTCACCGTA 1663

>miR1870-5p Score: 0.0 R03G\_15265  
Query: 1 TTGCTGAATGGACCAGTGGCAT 22  
|||||  
Sbjct: 1684 AACGACTTACCTGGTCACCGTA 1663

>miR1870-5p Score: 0.0 R03G\_15266  
Query: 1 TTGCTGAATGGACCAGTGGCAT 22  
|||||  
Sbjct: 1684 AACGACTTACCTGGTCACCGTA 1663

>miR1870-5p Score: 0.0 R03G\_15268  
Query: 1 TTGCTGAATGGACCAGTGGCAT 22  
|||||  
Sbjct: 1684 AACGACTTACCTGGTCACCGTA 1663

>miR1870-5p Score: 0.0 R03G\_14352  
Query: 1 TTGCTGAATGGACCAGTGGCAT 22  
|||||  
Sbjct: 1684 AACGACTTACCTGGTCACCGTA 1663

>miR1870-5p Score: 0.0 R03G\_13217  
Query: 1 TTGCTGAATGGACCAGTGGCAT 22  
|||||  
Sbjct: 1684 AACGACTTACCTGGTCACCGTA 1663

>miR1870-5p Score: 0.0 R03G\_13219  
Query: 1 TTGCTGAATGGACCAGTGGCAT 22  
|||||  
Sbjct: 1684 AACGACTTACCTGGTCACCGTA 1663

>miR1870-5p Score: 0.0 R03G\_13222  
Query: 1 TTGCTGAATGGACCAGTGGCAT 22  
|||||  
Sbjct: 1678 AACGACTTACCTGGTCACCGTA 1657

>miR1870-5p Score: 1.0 R03G\_13225  
Query: 1 TTGCTGAATGGACCAGTGGCAT 22  
|||||:|:|||||  
Sbjct: 1696 AACGACTTGCTTGGTCACCGTA 1675

>miR1870-5p Score: 1.0 R03G\_11967  
Query: 1 TTGCTGAATGGACCAGTGGCAT 22  
|||||:|:|||||  
Sbjct: 1696 AACGACTTGCTTGGTCACCGTA 1675

>miR1870-5p Score: 2.5 R03G\_08855

Query: 1 TTGCTGAATGGACCAGTGGCAT 22  
|:|:|||||\*|||\*|  
Sbjct: 935 AGTGACTTACCTGGACACCGCA 914  
>miR1870-5p Score: 0.0 R03G\_05640  
Query: 1 TTGCTGAATGGACCAGTGGCAT 22  
|:|:|||||\*|||\*|  
Sbjct: 1432 AACGACTTACCTGGTCACCGTA 1411  
>miR1870-5p Score: 2.5 R03G\_05952  
Query: 1 TTGCTGAATGGACCAGTGGCAT 22  
|:|:|||||\*|||\*|  
Sbjct: 1564 AACGACTCGCTTGGTTACCGTA 1543  
>miR1870-5p Score: 0.0 R03G\_03992  
Query: 1 TTGCTGAATGGACCAGTGGCAT 22  
|:|:|||||\*|||\*|  
Sbjct: 415 AACGACTTACCTGGTCACCGTA 394  
>miR1870-5p Score: 0.0 R03G\_04121  
Query: 1 TTGCTGAATGGACCAGTGGCAT 22  
|:|:|||||\*|||\*|  
Sbjct: 1684 AACGACTTACCTGGTCACCGTA 1663  
>miR2905 Score: 0.0 R03G\_15711  
Query: 1 TACTGTAGCCGACAAAGGCA 20  
|:|:|||||\*|||\*|  
Sbjct: 2394 ATGACATCGGCTGTTTCCGT 2375  
>miR2905 Score: 0.0 R03G\_13796  
Query: 1 TACTGTAGCCGACAAAGGCA 20  
|:|:|||||\*|||\*|  
Sbjct: 2394 ATGACATCGGCTGTTTCCGT 2375  
>miR2905 Score: 0.0 R03G\_11521  
Query: 1 TACTGTAGCCGACAAAGGCA 20  
|:|:|||||\*|||\*|  
Sbjct: 1356 ATGACATCGGCTGTTTCCGT 1337  
>miR2905 Score: 2.0 R03G\_11026  
Query: 1 TACTGTAGCCGACAAAGGCA 20  
|:|:|||||\*|||\*|  
Sbjct: 676 ATGGTATCGGTTGTTTCCGT 657  
>miR2905 Score: 0.0 R03G\_09539  
Query: 1 TACTGTAGCCGACAAAGGCA 20  
|:|:|||||\*|||\*|  
Sbjct: 2394 ATGACATCGGCTGTTTCCGT 2375  
>miR2905 Score: 1.8 R03G\_03627  
Query: 1 TACTGTAGCCGACAAAGGCA 20  
|:|:|||||\*|||\*|  
Sbjct: 411 GTGACATCGGCTGTTACCTT 392  
>miR2905 Score: 1.8 R03G\_01708  
Query: 1 TACTGTAGCCGACAAAGGCA 20





Sbjct: 724 ACGAACGTAATAGAACAACT 705  
>miR5557-3p Score: 0.0 R03G\_11527  
Query: 1 TGCTTGCATTATCTTGTTGA 20  
|||||

Sbjct: 130 ACGAACGTAATAGAACAACT 111  
>miR5557-3p Score: 2.5 R03G\_11925  
Query: 1 TGCTTGCATTATCTTGTTGA 20  
|||\*|||||\*|||||\*|

Sbjct: 160 ACGTACGTAAAAGAACAAT 141  
>miR5557-3p Score: 2.5 R03G\_10608  
Query: 1 TGCTTGCATTATCTTGTTG-A 20  
|||||:|:||||\*|||\*|

Sbjct: 8947 ACGAACGTAGTGAAGAACGT 8927  
>miR5557-3p Score: 1.0 R03G\_10734  
Query: 1 TGCTTGCATTATCTTGTTGA 20  
|||||\*|||||

Sbjct: 130 ACGAACGTAATACAACAAC 111  
>miR5557-3p Score: 0.0 R03G\_10774  
Query: 1 TGCTTGCATTATCTTGTTGA 20  
|||||

Sbjct: 691 ACGAACGTAATAGAACAACT 672  
>miR5557-3p Score: 1.0 R03G\_10869  
Query: 1 TGCTTGCATTATCTTGTTGA 20  
|||||\*|||||

Sbjct: 130 ACGAACGTAATAGTACAAC 111  
>miR5557-3p Score: 2.5 R03G\_05820  
Query: 1 TGCTTGCATTATCTTGTTGA 20  
\*|||||:||||\*|||\*|

Sbjct: 507 CCGAACGTAGTAGAAGAAGT 488  
>miR5557-3p Score: 0.0 R03G\_05935  
Query: 1 TGCTTGCATTATCTTGTTGA 20  
|||||

Sbjct: 130 ACGAACGTAATAGAACAACT 111  
>miR5557-3p Score: 2.5 R03G\_04254  
Query: 1 TGCTTGCATTATCTTGTTGA 20  
||||\*|\*|||||\*|

Sbjct: 487 ACGATCTTAATAGAACAAACC 468  
>miR5557-3p Score: 0.0 R03G\_04790  
Query: 1 TGCTTGCATTATCTTGTTGA 20  
|||||

Sbjct: 130 ACGAACGTAATAGAACAACT 111  
>miR5557-3p Score: 1.5 R03G\_05423  
Query: 1 TGCTTGCATTATCTTGTTGA 20  
||||:|||||\*|||||

Sbjct: 130 ACGAATGTAATAGATCAACT 111

>miR5557-3p Score: 1.0 R03G\_03593  
Query: 1 TGCTTGCATTATCTTGTTGA 20  
|||:||||:|||||||  
Sbjct: 130 ACGGACGTGATAGAACAAC 111

>miR5557-3p Score: 0.0 R03G\_03626  
Query: 1 TGCTTGCATTATCTTGTTGA 20  
|||||||  
Sbjct: 130 ACGAACGTAATAGAACAAC 111

>miR5557-3p Score: 2.5 R03G\_00114  
Query: 1 TGCTTGCATTATCTTGTTGA 20  
||\*|||||||:\*|||||||  
Sbjct: 466 ACTAACGTAATGAAACAAC 447

>miR5557-3p Score: 0.0 R03G\_00678  
Query: 1 TGCTTGCATTATCTTGTTGA 20  
|||||||  
Sbjct: 94 ACGAACGTAATAGAACAAC 75

>miR5557-3p Score: 0.0 R03G\_01589  
Query: 1 TGCTTGCATTATCTTGTTGA 20  
|||||||  
Sbjct: 130 ACGAACGTAATAGAACAAC 111

>miR5557-3p Score: 1.0 R03G\_17459  
Query: 1 TGCTTGCATTATCTTGTTGA 20  
|||||||\*|||||||  
Sbjct: 130 ACGAACGTAATACAACAAC 111

>miR5557-3p Score: 0.0 R03G\_17276  
Query: 1 TGCTTGCATTATCTTGTTGA 20  
|||||||  
Sbjct: 814 ACGAACGTAATAGAACAAC 795

>miR5232 Score: 2.5 R03G\_16099  
Query: 1 TGCATGTCCTCTACCTGAA 19  
|:|:|:|||||||\*|\*|  
Sbjct: 528 ATGTATAGGAGATGGTCGT 510

>miR5232 Score: 2.5 R03G\_10258  
Query: 1 TGCATGTCCTCTACCTGAA 19  
|||||:|:|||||||\*|:|  
Sbjct: 2768 ACGTATGGGAGATGTATTT 2750

>miR5232 Score: 2.5 R03G\_06489  
Query: 1 TGCATGTCCTCTACCTGAA 19  
\*|||||||:|\*|\*|  
Sbjct: 1506 TCGTACAGGAGGTGGTCGT 1488

>miR5232 Score: 2.0 R03G\_03614  
Query: 1 TGCATGTCCTCTACCTGAA 19  
\*||||:||||\*|||||||  
Sbjct: 289 TCGTATAGGAGCTGGACTT 271

>miR9491 Score: 0.0 R03G\_16744

Query: 1 TGCTATCTTCCTCTGACTCAG 21  
|||||  
Sbjct: 298 ACGATAGAAGGAGACTGAGTC 278  
>miR9491 Score: 0.0 R03G\_16686  
Query: 1 TGCTATCTTCCTCTGACTCAG 21  
|||||  
Sbjct: 298 ACGATAGAAGGAGACTGAGTC 278  
>miR9491 Score: 0.0 R03G\_15869  
Query: 1 TGCTATCTTCCTCTGACTCAG 21  
|||||  
Sbjct: 298 ACGATAGAAGGAGACTGAGTC 278  
>miR9491 Score: 0.0 R03G\_14704  
Query: 1 TGCTATCTTCCTCTGACTCAG 21  
|||||  
Sbjct: 298 ACGATAGAAGGAGACTGAGTC 278  
>miR9491 Score: 0.0 R03G\_13450  
Query: 1 TGCTATCTTCCTCTGACTCAG 21  
|||||  
Sbjct: 298 ACGATAGAAGGAGACTGAGTC 278  
>miR9491 Score: 0.0 R03G\_13861  
Query: 1 TGCTATCTTCCTCTGACTCAG 21  
|||||  
Sbjct: 298 ACGATAGAAGGAGACTGAGTC 278  
>miR9491 Score: 0.0 R03G\_12951  
Query: 1 TGCTATCTTCCTCTGACTCAG 21  
|||||  
Sbjct: 298 ACGATAGAAGGAGACTGAGTC 278  
>miR9491 Score: 0.0 R03G\_12979  
Query: 1 TGCTATCTTCCTCTGACTCAG 21  
|||||  
Sbjct: 298 ACGATAGAAGGAGACTGAGTC 278  
>miR9491 Score: 0.0 R03G\_13152  
Query: 1 TGCTATCTTCCTCTGACTCAG 21  
|||||  
Sbjct: 298 ACGATAGAAGGAGACTGAGTC 278  
>miR9491 Score: 0.0 R03G\_11970  
Query: 1 TGCTATCTTCCTCTGACTCAG 21  
|||||  
Sbjct: 298 ACGATAGAAGGAGACTGAGTC 278  
>miR9491 Score: 0.0 R03G\_12087  
Query: 1 TGCTATCTTCCTCTGACTCAG 21  
|||||  
Sbjct: 298 ACGATAGAAGGAGACTGAGTC 278  
>miR9491 Score: 0.0 R03G\_12194  
Query: 1 TGCTATCTTCCTCTGACTCAG 21

|||||  
Sbjct: 298 ACGATAGAAGGAGACTGAGTC 278  
>miR9491 Score: 0.0 R03G\_11275  
Query: 1 TGCTATCTCCTCTGACTCAG 21  
|||||  
Sbjct: 298 ACGATAGAAGGAGACTGAGTC 278  
>miR9491 Score: 0.0 R03G\_11403  
Query: 1 TGCTATCTCCTCTGACTCAG 21  
|||||  
Sbjct: 298 ACGATAGAAGGAGACTGAGTC 278  
>miR9491 Score: 0.0 R03G\_10555  
Query: 1 TGCTATCTCCTCTGACTCAG 21  
|||||  
Sbjct: 298 ACGATAGAAGGAGACTGAGTC 278  
>miR9491 Score: 0.0 R03G\_10560  
Query: 1 TGCTATCTCCTCTGACTCAG 21  
|||||  
Sbjct: 298 ACGATAGAAGGAGACTGAGTC 278  
>miR9491 Score: 0.0 R03G\_09376  
Query: 1 TGCTATCTCCTCTGACTCAG 21  
|||||  
Sbjct: 298 ACGATAGAAGGAGACTGAGTC 278  
>miR9491 Score: 0.0 R03G\_08612  
Query: 1 TGCTATCTCCTCTGACTCAG 21  
|||||  
Sbjct: 298 ACGATAGAAGGAGACTGAGTC 278  
>miR9491 Score: 2.0 R03G\_08632  
Query: 1 TGCTATCTCCTCTGACTCAG 21  
\*|||||\*|||\*  
Sbjct: 523 TCGATAGAAGGAGACTAAGTG 503  
>miR9491 Score: 0.0 R03G\_07104  
Query: 1 TGCTATCTCCTCTGACTCAG 21  
|||||  
Sbjct: 298 ACGATAGAAGGAGACTGAGTC 278  
>miR9491 Score: 0.0 R03G\_07305  
Query: 1 TGCTATCTCCTCTGACTCAG 21  
|||||  
Sbjct: 298 ACGATAGAAGGAGACTGAGTC 278  
>miR9491 Score: 0.0 R03G\_05630  
Query: 1 TGCTATCTCCTCTGACTCAG 21  
|||||  
Sbjct: 298 ACGATAGAAGGAGACTGAGTC 278  
>miR9491 Score: 0.0 R03G\_06416  
Query: 1 TGCTATCTCCTCTGACTCAG 21  
|||||

Sbjct: 298 ACGATAGAAGGAGACTGAGTC 278  
>miR9491 Score: 0.0 R03G\_05280  
Query: 1 TGCTATCTTCCTCTGACTCAG 21  
|||||  
Sbjct: 298 ACGATAGAAGGAGACTGAGTC 278  
>miR9491 Score: 0.0 R03G\_03103  
Query: 1 TGCTATCTTCCTCTGACTCAG 21  
|||||  
Sbjct: 298 ACGATAGAAGGAGACTGAGTC 278  
>miR9491 Score: 0.0 R03G\_03988  
Query: 1 TGCTATCTTCCTCTGACTCAG 21  
|||||  
Sbjct: 298 ACGATAGAAGGAGACTGAGTC 278  
>miR9491 Score: 0.0 R03G\_01203  
Query: 1 TGCTATCTTCCTCTGACTCAG 21  
|||||  
Sbjct: 298 ACGATAGAAGGAGACTGAGTC 278  
>miR9491 Score: 0.0 R03G\_01718  
Query: 1 TGCTATCTTCCTCTGACTCAG 21  
|||||  
Sbjct: 298 ACGATAGAAGGAGACTGAGTC 278  
>miR1068 Score: 0.0 R03G\_16557  
Query: 1 TAGCCAGTTTTGCTTGCAAGGTC 22  
|||||  
Sbjct: 418 ATCGGTCAAACGAACGTCCAG 397  
>miR1068 Score: 0.0 R03G\_16132  
Query: 1 TAGCCAGTTTTGCTTGCAAGGTC 22  
|||||  
Sbjct: 418 ATCGGTCAAACGAACGTCCAG 397  
>miR1068 Score: 0.2 R03G\_14995  
Query: 1 TAGCCAGTTTTGCTTGCAAGGTC 22  
|||||:|  
Sbjct: 418 ATCGGTCAAACGAACGTCCGG 397  
>miR1068 Score: 0.0 R03G\_15134  
Query: 1 TAGCCAGTTTTGCTTGCAAGGTC 22  
|||||  
Sbjct: 460 ATCGGTCAAACGAACGTCCAG 439  
>miR1068 Score: 0.0 R03G\_12470  
Query: 1 TAGCCAGTTTTGCTTGCAAGGTC 22  
|||||  
Sbjct: 418 ATCGGTCAAACGAACGTCCAG 397  
>miR1068 Score: 0.0 R03G\_11525  
Query: 1 TAGCCAGTTTTGCTTGCAAGGTC 22  
|||||  
Sbjct: 418 ATCGGTCAAACGAACGTCCAG 397



Query: 1 TAGCCAGTTTTGCTTGCAGGTC 22  
|||||  
Sbjct: 418 ATCGGTCAAACGAACGTCCAG 397  
>miR1068 Score: 0.0 R03G\_01745  
Query: 1 TAGCCAGTTTTGCTTGCAGGTC 22  
|||||  
Sbjct: 418 ATCGGTCAAACGAACGTCCAG 397  
>miR1068 Score: 0.0 R03G\_01928  
Query: 1 TAGCCAGTTTTGCTTGCAGGTC 22  
|||||  
Sbjct: 418 ATCGGTCAAACGAACGTCCAG 397  
>miR6300 Score: 2.5 R03G\_16776  
Query: 1 GGTGGCTGTAGTATAGTGG 19  
|||||:||||\*|||  
Sbjct: 296 CCACCGACATTATAAGACC 278  
>miR6300 Score: 2.5 R03G\_16779  
Query: 1 GGTGGCTGTAGTATAGTGG 19  
|||||:||||\*|||  
Sbjct: 674 CCACCGACATTATAAGACC 656  
>miR6300 Score: 2.5 R03G\_16085  
Query: 1 GGTGGCTGTAGTATAGTGG 19  
|||||:||||\*|||  
Sbjct: 674 CCACCGACATTATAAGACC 656  
>miR6300 Score: 2.5 R03G\_15802  
Query: 1 GGTGGCTGTAGTATAGTGG 19  
|||||:||||\*|||  
Sbjct: 674 CCACCGACATTATAAGACC 656  
>miR6300 Score: 2.5 R03G\_14949  
Query: 1 GGTGGCTGTAGTATAGTGG 19  
|||||:||||\*|||  
Sbjct: 296 CCACCGACATTATAAGACC 278  
>miR6300 Score: 2.5 R03G\_14215  
Query: 1 GGTGGCTGTAGTATAGTGG 19  
|||||:||||\*|||  
Sbjct: 674 CCACCGACATTATAAGACC 656  
>miR6300 Score: 2.5 R03G\_12815  
Query: 1 GGTGGCTGTAGTATAGTGG 19  
|:|:|||||\*||||:|||  
Sbjct: 507 CTATCGACATAATATTACC 489  
>miR6300 Score: 2.5 R03G\_12567  
Query: 1 GGTGGCTGTAGTATAGTGG 19  
|||||:||||\*|||  
Sbjct: 674 CCACCGACATTATAAGACC 656  
>miR6300 Score: 2.2 R03G\_08103  
Query: 1 GGTGGCTGTAGTATAGTGG 19



:||:||||\*||||:|  
Sbjct: 93 TCATCGACAACATATTACC 75  
>miR6300 Score: 2.5 R03G\_06775  
Query: 1 GGTGGCTGTAGTATAGTGG 19  
|||||||:||\*\*||  
Sbjct: 674 CCACCGACATTATAAGACC 656  
>miR6300 Score: 2.5 R03G\_06912  
Query: 1 GGTGGCTGTAGTATAGTGG 19  
|\*||||||:||||:|\*|  
Sbjct: 345 CAACCGACATTATATTAAC 327  
>miR6300 Score: 2.5 R03G\_07854  
Query: 1 GGTGGCTGTAGTATAGTGG 19  
|||||||:||\*\*||  
Sbjct: 674 CCACCGACATTATAAGACC 656  
>miR6300 Score: 2.5 R03G\_06350  
Query: 1 GGTGGCTGTAGTATAGTGG 19  
|||||||:||\*\*||  
Sbjct: 296 CCACCGACATTATAAGACC 278  
>miR6300 Score: 2.5 R03G\_04252  
Query: 1 GGTGGCTGTAGTATAGTGG 19  
|||||||:||\*\*||  
Sbjct: 674 CCACCGACATTATAAGACC 656  
>miR6300 Score: 2.5 R03G\_04496  
Query: 1 GGTGGCTGTAGTATAGTGG 19  
|||||||:||\*\*||  
Sbjct: 296 CCACCGACATTATAAGACC 278  
>miR6300 Score: 2.5 R03G\_02364  
Query: 1 GGTGGCTGTAGTATAGTGG 19  
|||||||:||\*\*||  
Sbjct: 674 CCACCGACATTATAAGACC 656  
>miR6300 Score: 2.5 R03G\_03404  
Query: 1 GGTGGCTGTAGTATAGTGG 19  
:|||:|||:|\*|||||:  
Sbjct: 104 TCACTGACGTAATATCATC 86  
>miR6300 Score: 2.5 R03G\_01157  
Query: 1 GGTGGCTGTAGTATAGTGG 19  
|||||||:||\*\*||  
Sbjct: 296 CCACCGACATTATAAGACC 278  
>miR6300 Score: 2.5 R03G\_17397  
Query: 1 GGTGGCTGTAGTATAGTGG 19  
|||||||:||\*\*||  
Sbjct: 296 CCACCGACATTATAAGACC 278  
>miR2602a Score: 2.2 R03G\_17076  
Query: 1 TTCCAGTGATTGCCAGCAT 19  
::|||||:|||||||:|\*|

Sbjct: 814 GGGGTCATTAACGGTTGCA 796  
>miR2602a Score: 2.2 R03G\_16143  
Query: 1 TTCCAGTGATTGCCAGCAT 19  
|:|||||\*|||||||:|:|  
Sbjct: 4493 AGGGTCAGTAACGGTTGTG 4475  
>miR2602a Score: 0.5 R03G\_14983  
Query: 1 TTCCAGTGATTGCCAGCAT 19  
|||||||:|||||||  
Sbjct: 560 AAGGTCATTAACGGTCGTA 542  
>miR2602a Score: 2.2 R03G\_15136  
Query: 1 TTCCAGTGATTGCCAGCAT 19  
|:|||||\*|||||||:|:|  
Sbjct: 203 AGGGTCAGTAACGGTTGTG 185  
>miR2602a Score: 0.0 R03G\_13914  
Query: 1 TTCCAGTGATTGCCAGCAT 19  
|||||||  
Sbjct: 755 AAGGTCACTAACGGTCGTA 737  
>miR2602a Score: 2.0 R03G\_13096  
Query: 1 TTCCAGTGATTGCCAGCAT 19  
||||||:|:|\*|||  
Sbjct: 287 AAGGTCGCTGACGGTGGTA 269  
>miR2602a Score: 0.0 R03G\_12058  
Query: 1 TTCCAGTGATTGCCAGCAT 19  
|||||||  
Sbjct: 755 AAGGTCACTAACGGTCGTA 737  
>miR2602a Score: 2.2 R03G\_12181  
Query: 1 TTCCAGTGATTGCCAGCAT 19  
|:|||||\*|||||||:|:|  
Sbjct: 1310 AGGGTCAGTAACGGTTGTG 1292  
>miR2602a Score: 2.2 R03G\_12533  
Query: 1 TTCCAGTGATTGCCAGCAT 19  
|:|||||\*|||||||:|:|  
Sbjct: 3836 AGGGTCAGTAACGGTTGTG 3818  
>miR2602a Score: 2.2 R03G\_10535  
Query: 1 TTCCAGTGATTGCCAGCAT 19  
|:|||||\*|||||||:|:|  
Sbjct: 2141 AGGGTCAGTAACGGTTGTG 2123  
>miR2602a Score: 0.0 R03G\_10801  
Query: 1 TTCCAGTGATTGCCAGCAT 19  
|||||||  
Sbjct: 560 AAGGTCACTAACGGTCGTA 542  
>miR2602a Score: 0.0 R03G\_09614  
Query: 1 TTCCAGTGATTGCCAGCAT 19  
|||||||  
Sbjct: 86 AAGGTCACTAACGGTCGTA 68

>miR2602a Score: 2.2 R03G\_06752  
Query: 1 TTCCAGTGATTGCCAGCAT 19  
:|||||:|||:|||\*|||  
Sbjct: 197 GAGGTCATTAATGGTAGTA 179

>miR2602a Score: 2.2 R03G\_07028  
Query: 1 TTCCAGTGATTGCCAGCAT 19  
|:||||\*|||||||:|:  
Sbjct: 3479 AGGGTCAGTAACGGTTGTG 3461

>miR2602a Score: 2.2 R03G\_05750  
Query: 1 TTCCAGTGATTGCCAGCAT 19  
:||\*|||||:||||||\*|  
Sbjct: 309 GAGATCACTGACGGTCGGA 291

>miR2602a Score: 2.2 R03G\_05918  
Query: 1 TTCCAGTGATTGCCAGCAT 19  
|:||||\*|||||||:|:  
Sbjct: 1016 AGGGTCAGTAACGGTTGTG 998

>miR2602a Score: 2.2 R03G\_05520  
Query: 1 TTCCAGTGATTGCCAGCAT 19  
|:||||\*|||||||:|:  
Sbjct: 1163 AGGGTCAGTAACGGTTGTG 1145

>miR2602a Score: 0.0 R03G\_02233  
Query: 1 TTCCAGTGATTGCCAGCAT 19  
|||||||  
Sbjct: 284 AAGGTCACTAACGGTCGTA 266

>miR2602a Score: 2.2 R03G\_02691  
Query: 1 TTCCAGTGATTGCCAGCAT 19  
|:||||\*|||||||:|:  
Sbjct: 2942 AGGGTCAGTAACGGTTGTG 2924

>miR2602a Score: 1.0 R03G\_03556  
Query: 1 TTCCAGTGATTGCCAGCAT 19  
|||||||\*|||||  
Sbjct: 560 AAGGTCACTAACAGTCGTA 542

>miR2602a Score: 0.5 R03G\_03583  
Query: 1 TTCCAGTGATTGCCAGCAT 19  
|||||||\*|  
Sbjct: 560 AAGGTCACTAACGGTCGCA 542

>miR2602a Score: 2.0 R03G\_03950  
Query: 1 TTCCAGTGATTGCCAGCAT 19  
\*||||:|\*|||||||  
Sbjct: 220 CAGGTTACGAACGGTCGTA 202

>miR2602a Score: 2.5 R03G\_00540  
Query: 1 TTCCAGTGATTGCCAGCAT 19  
:||\*|||||||:|\*:  
Sbjct: 346 GAGGACACTAACGGTTG-G 329

>miR2602a Score: 2.5 R03G\_00714

Query: 1 TTCCAGTGATTGCCAGCAT 19  
\*:|||||\*:|||||  
Sbjct: 1934 CGGGTCACAGACGGTCGTA 1916  
>miR2602a Score: 2.5 R03G\_01041  
Query: 1 TTCCAGTGATTGCCAGCAT 19  
\*||||:|\*|||||||\*|  
Sbjct: 452 TAGGTTAATAACGGTCG-A 435  
>miR2602a Score: 0.0 R03G\_17462  
Query: 1 TTCCAGTGATTGCCAGCAT 19  
|||||||  
Sbjct: 887 AAGGTCACTAACGGTCGTA 869  
>miR2602a Score: 2.2 R03G\_17383  
Query: 1 TTCCAGTGATTGCCAGCAT 19  
|:|||||\*|||||||:|:  
Sbjct: 995 AGGGTCAGTAACGGTTGTG 977  
>miR2602a Score: 2.2 R03G\_17329  
Query: 1 TTCCAGTGATTGCCAGCAT 19  
|:|||||\*|||||||:|:  
Sbjct: 3833 AGGGTCAGTAACGGTTGTG 3815  
>miR2602a Score: 2.2 R03G\_17318  
Query: 1 TTCCAGTGATTGCCAGCAT 19  
|:|||||\*|||||||:|:  
Sbjct: 4496 AGGGTCAGTAACGGTTGTG 4478  
>miR2602a Score: 2.2 R03G\_17274  
Query: 1 TTCCAGTGATTGCCAGCAT 19  
|:|||||\*|||||||:|:  
Sbjct: 4319 AGGGTCAGTAACGGTTGTG 4301  
>miR8138 Score: 2.0 R03G\_16489  
Query: 1 TAAAGAGGCAACAAAGGAAG 20  
\*|||||:|||||||\*\*|  
Sbjct: 516 TTTTCTTCGTTGTTTCCAAC 497  
>miR8138 Score: 2.0 R03G\_16495  
Query: 1 TAAAGAGGCAACAAAGGAAG 20  
\*|||||:|||||||\*\*|  
Sbjct: 516 TTTTCTTCGTTGTTTCCAAC 497  
>miR8138 Score: 1.5 R03G\_16000  
Query: 1 TAAAGAGGCAACAAAGGAAG 20  
|||||||\*|||||||\*  
Sbjct: 813 ATTTCTCCGATGTTTCCTTG 794  
>miR8138 Score: 2.5 R03G\_12215  
Query: 1 TAAAGAGGCAACAAAGGAAG 20  
||||\*|||||||\*|\*|  
Sbjct: 30 ATTTGTCCGTTGTTTC-TGC 12  
>miR8138 Score: 1.0 R03G\_08778  
Query: 1 TAAAGAGGCAACAAAGGAAG 20

\*|||||\*||  
Sbjct: 648 CTTTCTCCGTTGTTTCCGTC 629  
>miR8138 Score: 1.8 R03G\_04385  
Query: 1 TAAAGAGGCAACAAAGGAAG 20  
:|||||\*||\*||  
Sbjct: 426 GTTTCTCCGTTGTTCCCGTC 407  
>miR8138 Score: 2.5 R03G\_04748  
Query: 1 TAAAGAGGCAACAAAGGAAG 20  
|||||\*|||\*||\*||  
Sbjct: 4053 ATTTCTCCTTTGTCTCCGTC 4034  
>miR8138 Score: 2.5 R03G\_02876  
Query: 1 TAAAGAGGCAACAAAGGAAG 20  
\*||\*|||:|||||\*||  
Sbjct: 41 TTTCTCTGTTGTTTCC-TC 23  
>miR396b Score: 2.5 R03G\_14017  
Query: 1 TTCCACAGCTTTCTTGAAGT 20  
||||\*|||||\*||||\*||  
Sbjct: 1794 AAGGTCTCGAAATAACT-GA 1776  
>miR396b Score: 2.5 R03G\_09454  
Query: 1 TTCCACAGCTTTCTTGAAGT 20  
||\*|||||\*|||||\*  
Sbjct: 2287 AAAGTGTGAAACAACACTTGC 2268  
>miR396b Score: 2.5 R03G\_07651  
Query: 1 TTCCACAGCTTTCTTGAAGT 20  
||\*|||||\*||\*||  
Sbjct: 4225 AAAGTGTGAAAGAAATTA 4206  
>miR396b Score: 2.0 R03G\_02790  
Query: 1 TTCCACAGCTTTCTTGAAC-T 20  
||||\*|||||\*||\*||  
Sbjct: 759 AAGGTATCGAAAGAACTCGCA 739  
>miR396b Score: 2.5 R03G\_03278  
Query: 1 TTCCACAGCTTTCTTGAAGT 20  
|||||:||||\*|:||\*||  
Sbjct: 1794 AAGGTGTTGAAAAAGCTT-A 1776  
>miR396b Score: 2.5 R03G\_03333  
Query: 1 TTCCACAGCTTTCTTGAAGT 20  
||||\*||||:|||||\*||  
Sbjct: 912 AAGGTATCGAGAGAACT-CA 894  
>miR396b Score: 2.5 R03G\_16940  
Query: 1 TTCCACAGCTTTCTTGAAGT 20  
||\*||||\*|||||\*||  
Sbjct: 69 AAGCTGTCTAAAGAACTCGA 50  
>miR7711-5p.1 Score: 2.0 R03G\_15141  
Query: 1 TACTTAGCTGTTTGAAGTCTTG 22  
||\*||\*|||||

Sbjct: 75 ATAAAACGACAAACTGAAGAAC 54  
>miR7711-5p.1 Score: 1.0 R03G\_12954  
Query: 1 TACTTAGCTGTTTGACTTCTTG 22  
||||\*|||||||||||||||||

Sbjct: 75 ATGAAACGACAAACTGAAGAAC 54  
>miR7711-5p.1 Score: 1.0 R03G\_10762  
Query: 1 TACTTAGCTGTTTGACTTCTTG 22  
||||\*|||||||||||||||||

Sbjct: 75 ATGAAACGACAAACTGAAGAAC 54  
>miR7711-5p.1 Score: 1.0 R03G\_10770  
Query: 1 TACTTAGCTGTTTGACTTCTTG 22  
||||\*|||||||||||||||||

Sbjct: 75 ATGAAACGACAAACTGAAGAAC 54  
>miR7711-5p.1 Score: 2.0 R03G\_09168  
Query: 1 TACTTAGCTGTTTGACTTCTTG 22  
||\*||\*|||||||||||||||||

Sbjct: 75 ATAAAACGACAAACTGAAGAAC 54  
>miR7711-5p.1 Score: 2.0 R03G\_04690  
Query: 1 TACTTAGCTGTTTGACTTCTTG 22  
||\*||\*|||||||||||||||||

Sbjct: 75 ATAAAGCGACAAACTGAAGAAC 54  
>miR7711-5p.1 Score: 2.0 R03G\_04787  
Query: 1 TACTTAGCTGTTTGACTTCTTG 22  
||\*||\*|||||||||||||||||

Sbjct: 75 ATAAAACGACAAACTGAAGAAC 54  
>miR7711-5p.1 Score: 2.0 R03G\_05431  
Query: 1 TACTTAGCTGTTTGACTTCTTG 22  
||\*||\*|||||||||||||||||

Sbjct: 75 ATAAAGCGACAAACTGAAGAAC 54  
>miR7711-5p.1 Score: 2.0 R03G\_02822  
Query: 1 TACTTAGCTGTTTGACTTCTTG 22  
||\*||\*|||||||||||||||||

Sbjct: 75 ATAAAGCGACAAACTGAAGAAC 54  
>miR7711-5p.1 Score: 1.0 R03G\_00304  
Query: 1 TACTTAGCTGTTTGACTTCTTG 22  
||||\*|||||||||||||||||

Sbjct: 75 ATGAAACGACAAACTGAAGAAC 54  
>miR5373 Score: 2.5 R03G\_15307  
Query: 1 TCTCTTGTATGCTGATGATGT-T 22  
|\*||||||||||||\*||||\*|

Sbjct: 1504 ACAGAACATACGACAACTACACA 1482  
>miR5373 Score: 2.0 R03G\_14120  
Query: 1 TCTCTTGTATGCTGATGATGTT 22  
|||\*|||||||:||||||\*|

Sbjct: 166 AGAAAACATACGGCTACTACAT 145

>miR5373 Score: 2.5 R03G\_10168  
Query: 1 TCTCTTGTATGCTGATGATGTT 22  
|||||||\*:|||||\*||  
Sbjct: 281 AGAGAACATTTGACTACGA-AA 261

>miR7837 Score: 0.0 R03G\_11243  
Query: 1 TGGGTGTAGGAGTGGTAGCTG 21  
|||||||  
Sbjct: 178 ACCCACATCCTCACCATCGAC 158

>miR7837 Score: 2.5 R03G\_08703  
Query: 1 TGGGTGTAGGAGTGGTAGCTG 21  
|||||||:|\*:|||\*||  
Sbjct: 34 ACCCACATCTTCTTCATCCAC 14

>miR7837 Score: 2.5 R03G\_06473  
Query: 1 TGGGTGTAGGAGTGGTAGCTG 21  
\*|||||||:|:|\*|||  
Sbjct: 148 TCCCACATCTTCATCGT-GAC 129

>miR7837 Score: 2.5 R03G\_05294  
Query: 1 TGGGTGTAGGAGTGGTAGCTG 21  
::||:|:|:|  
Sbjct: 247 GTCCGCATTTTCACCATCGAT 227

>miR7837 Score: 2.0 R03G\_00539  
Query: 1 TGGGTGTAGGAGTGGTAGCTG 21  
|||||\*|||||||\*||||  
Sbjct: 319 ACCCACTTCCTCACCTCGAC 299

>miR7837 Score: 2.0 R03G\_01660  
Query: 1 TGGGTGTAGGAGTGGTAGCTG 21  
::|||:|:|:|\*|:  
Sbjct: 853 GTCCACGCCTCACCATC-AT 834

>miR7837 Score: 2.5 R03G\_02068  
Query: 1 TGGGTGTAGGAGTGGTAGCTG 21  
|||||||:|\*|||\*||  
Sbjct: 226 ACCCACATCCTTCCCAT-AAC 207

>miR1515 Score: 0.2 R03G\_16894  
Query: 1 TATTTTAGCATGACAATGATCC 22  
|||||||:|  
Sbjct: 36 ATAAAATCGTACTGTTACTGGG 15

>miR1515 Score: 2.5 R03G\_16705  
Query: 1 TATTTTAGCATGACAATGATCC 22  
|\*|||:|\*|||  
Sbjct: 69 ACAAAGTCGTCCTGTTACTAGG 48

>miR1515 Score: 2.5 R03G\_16375  
Query: 1 TATTTTAGCATGACAATGATCC 22  
|\*|||:|\*|||  
Sbjct: 69 ACAAAGTCGTCCTGTTACTAGG 48

>miR1515 Score: 2.5 R03G\_16552

Query: 1 TATTTTAGCATGACAATGATCC 22  
|\*|||:||||\*|||||||  
Sbjct: 69 ACAAAGTCGTCCTGTTACTAGG 48  
>miR1515 Score: 2.5 R03G\_15668  
Query: 1 TATTTTAGCATGACAATGATCC 22  
|\*|||:||||\*|||||||  
Sbjct: 78 ACAAAGTCGTCCTGTTACTAGG 57  
>miR1515 Score: 2.5 R03G\_14803  
Query: 1 TATTTTAGCATGACAATGATCC 22  
|\*|||:||||\*|||||||  
Sbjct: 69 ACAAAGTCGTCCTGTTACTAGG 48  
>miR1515 Score: 2.5 R03G\_15135  
Query: 1 TATTTTAGCATGACAATGATCC 22  
|\*|||:||||\*|||||||  
Sbjct: 4260 ACAAAGTCGTCCTGTTACTAGG 4239  
>miR1515 Score: 2.5 R03G\_14638  
Query: 1 TATTTTAGCATGACAATGATCC 22  
|\*|||:||||\*|||||||  
Sbjct: 69 ACAAAGTCGTCCTGTTACTAGG 48  
>miR1515 Score: 1.8 R03G\_13731  
Query: 1 TATTTTAGCATGACAATGATCC 22  
\*\*|||||||:|  
Sbjct: 224 TGAAAATCGTACTGTTACTGGG 203  
>miR1515 Score: 2.5 R03G\_12191  
Query: 1 TATTTTAGCATGACAATGATCC 22  
|\*|||:||||\*|||||||  
Sbjct: 69 ACAAAGTCGTCCTGTTACTAGG 48  
>miR1515 Score: 2.5 R03G\_12648  
Query: 1 TATTTTAGCATGACAATGATCC 22  
|\*|||:||||\*|||||||  
Sbjct: 69 ACAAAGTCGTCCTGTTACTAGG 48  
>miR1515 Score: 2.5 R03G\_11260  
Query: 1 TATTTTAGCATGACAATGATCC 22  
|\*|||:||||\*|||||||  
Sbjct: 69 ACAAAGTCGTCCTGTTACTAGG 48  
>miR1515 Score: 2.5 R03G\_11408  
Query: 1 TATTTTAGCATGACAATGATCC 22  
|\*|||:||||\*|||||||  
Sbjct: 69 ACAAAGTCGTCCTGTTACTAGG 48  
>miR1515 Score: 1.2 R03G\_10527  
Query: 1 TATTTTAGCATGACAATGATCC 22  
|\*|||||||:|  
Sbjct: 210 ACAAATCGTACTGTTACTGGG 189  
>miR1515 Score: 2.5 R03G\_10534  
Query: 1 TATTTTAGCATGACAATGATCC 22



|\*|||:||||\*|||||||  
Sbjct: 69 ACAAAGTCGTCCTGTTACTAGG 48  
>miR1515 Score: 2.5 R03G\_10536  
Query: 1 TATTTTAGCATGACAATGATCC 22  
|\*|||:||||\*|||||||  
Sbjct: 69 ACAAAGTCGTCCTGTTACTAGG 48  
>miR1515 Score: 1.8 R03G\_10553  
Query: 1 TATTTTAGCATGACAATGATCC 22  
\*\*|||||||:|  
Sbjct: 210 TAAAAATCGTACTGTTACTGGG 189  
>miR1515 Score: 2.5 R03G\_10554  
Query: 1 TATTTTAGCATGACAATGATCC 22  
|\*|||:||||\*|||||||  
Sbjct: 69 ACAAAGTCGTCCTGTTACTAGG 48  
>miR1515 Score: 1.8 R03G\_10559  
Query: 1 TATTTTAGCATGACAATGATCC 22  
\*\*|||||||:|  
Sbjct: 210 TAAAAATCGTACTGTTACTGGG 189  
>miR1515 Score: 2.5 R03G\_10872  
Query: 1 TATTTTAGCATGACAATGATCC 22  
|\*|||:||||\*|||||||  
Sbjct: 69 ACAAAGTCGTCCTGTTACTAGG 48  
>miR1515 Score: 1.2 R03G\_09962  
Query: 1 TATTTTAGCATGACAATGATCC 22  
|\*|||||||:|  
Sbjct: 36 ACAAATCGTACTGTTACTGGG 15  
>miR1515 Score: 1.2 R03G\_09968  
Query: 1 TATTTTAGCATGACAATGATCC 22  
|\*|||||||:|  
Sbjct: 36 ACAAATCGTACTGTTACTGGG 15  
>miR1515 Score: 2.5 R03G\_07986  
Query: 1 TATTTTAGCATGACAATGATCC 22  
|\*|||:||||\*|||||||  
Sbjct: 69 ACAAAGTCGTCCTGTTACTAGG 48  
>miR1515 Score: 2.5 R03G\_07987  
Query: 1 TATTTTAGCATGACAATGATCC 22  
|\*|||:||||\*|||||||  
Sbjct: 69 ACAAAGTCGTCCTGTTACTAGG 48  
>miR1515 Score: 2.5 R03G\_07724  
Query: 1 TATTTTAGCATGACAATGATCC 22  
|\*|||:||||\*|||||||  
Sbjct: 69 ACAAAGTCGTCCTGTTACTAGG 48  
>miR1515 Score: 2.5 R03G\_07731  
Query: 1 TATTTTAGCATGACAATGATCC 22  
|\*|||:||||\*|||||||

Sbjct: 69 ACAAAGTCGTCCTGTTACTAGG 48  
>miR1515 Score: 2.5 R03G\_05917  
Query: 1 TATTTTAGCATGACAATGATCC 22  
|\*|||:||||\*|||||||

Sbjct: 69 ACAAAGTCGTCCTGTTACTAGG 48  
>miR1515 Score: 2.5 R03G\_05931  
Query: 1 TATTTTAGCATGACAATGATCC 22  
|\*|||:||||\*|||||||

Sbjct: 69 ACAAAGTCGTCCTGTTACTAGG 48  
>miR1515 Score: 2.5 R03G\_05948  
Query: 1 TATTTTAGCATGACAATGATCC 22  
|\*|||:||||\*|||||||

Sbjct: 69 ACAAAGTCGTCCTGTTACTAGG 48  
>miR1515 Score: 2.5 R03G\_06419  
Query: 1 TATTTTAGCATGACAATGATCC 22  
|\*|||:||||\*|||||||

Sbjct: 69 ACAAAGTCGTCCTGTTACTAGG 48  
>miR1515 Score: 2.5 R03G\_03592  
Query: 1 TATTTTAGCATGACAATGATCC 22  
|\*|||:||||\*|||||||

Sbjct: 69 ACAAAGTCGTCCTGTTACTAGG 48  
>miR1515 Score: 2.5 R03G\_03596  
Query: 1 TATTTTAGCATGACAATGATCC 22  
|\*|||:||||\*|||||||

Sbjct: 69 ACAAAGTCGTCCTGTTACTAGG 48  
>miR1515 Score: 2.5 R03G\_03788  
Query: 1 TATTTTAGCATGACAATGATCC 22  
|\*|||:||||\*|||||||

Sbjct: 69 ACAAAGTCGTCCTGTTACTAGG 48  
>miR1515 Score: 2.5 R03G\_04026  
Query: 1 TATTTTAGCATGACAATGATCC 22  
|\*|||:||||\*|||||||

Sbjct: 69 ACAAAGTCGTCCTGTTACTAGG 48  
>miR1515 Score: 2.5 R03G\_04199  
Query: 1 TATTTTAGCATGACAATGATCC 22  
|\*|||:||||\*|||||||

Sbjct: 69 ACAAAGTCGTCCTGTTACTAGG 48  
>miR1515 Score: 2.5 R03G\_00246  
Query: 1 TATTTTAGCATGACAATGATCC 22  
|\*|||:||||\*|||||||

Sbjct: 69 ACAAAGTCGTCCTGTTACTAGG 48  
>miR1515 Score: 2.5 R03G\_00685  
Query: 1 TATTTTAGCATGACAATGATCC 22  
|\*|||:||||\*|||||||

Sbjct: 69 ACAAAGTCGTCCTGTTACTAGG 48

>miR1515 Score: 2.5 R03G\_01200  
Query: 1 TATTTTAGCATGACAATGATCC 22  
|\*|||:||||\*|||||||  
Sbjct: 69 ACAAAGTCGTCCTGTTACTAGG 48

>miR1515 Score: 2.5 R03G\_01316  
Query: 1 TATTTTAGCATGACAATGATCC 22  
|\*|||:||||\*|||||||  
Sbjct: 69 ACAAAGTCGTCCTGTTACTAGG 48

>miR1515 Score: 2.5 R03G\_01736  
Query: 1 TATTTTAGCATGACAATGATCC 22  
|\*|||:||||\*|||||||  
Sbjct: 69 ACAAAGTCGTCCTGTTACTAGG 48

>miR1515 Score: 2.5 R03G\_01957  
Query: 1 TATTTTAGCATGACAATGATCC 22  
|\*|||:||||\*|||||||  
Sbjct: 69 ACAAAGTCGTCCTGTTACTAGG 48

>miR1515 Score: 2.5 R03G\_17368  
Query: 1 TATTTTAGCATGACAATGATCC 22  
|\*|||:||||\*|||||||  
Sbjct: 69 ACAAAGTCGTCCTGTTACTAGG 48

>miR1515 Score: 0.2 R03G\_17349  
Query: 1 TATTTTAGCATGACAATGATCC 22  
|||||||:|  
Sbjct: 36 ATAAAATCGTACTGTTACTGGG 15

>miR7502b Score: 2.5 R03G\_16530  
Query: 1 TTGTTAATAAGTTCATGC-AT 20  
||:|||||:||||\*||  
Sbjct: 1031 AATAATTATTTAAGTAAGTTA 1011

>miR7502b Score: 2.5 R03G\_14312  
Query: 1 TTGTTAATAAGTTCATGCAT 20  
\*|:|\*|||||||\*||  
Sbjct: 962 CATATTTATTCAAGTACTTA 943

>miR7502b Score: 2.0 R03G\_12923  
Query: 1 TTGTTAATAAGTTCATGCAT 20  
|::|||||:|||||\*  
Sbjct: 602 AGTAATTATTTAAGTACGTT 583

>miR7502b Score: 2.5 R03G\_13261  
Query: 1 TTGTTAATAAGTTCATGC-AT 20  
|||:|||||:|||||\*||  
Sbjct: 1246 AACGATTATTTAAGTATATTA 1226

>miR7502b Score: 2.2 R03G\_12569  
Query: 1 TTGTTAATAAGTTCATGCAT 20  
:||:|\*|:|||||||  
Sbjct: 281 GACGATAGTTCAAGTACGTA 262

>miR7502b Score: 2.5 R03G\_08198

Query: 1 TTGTTAATAAGTTCATGCAT 20  
|||::|||||||\*||\*|  
Sbjct: 190 AACGGTTATTCAAGAACG-A 172  
>miR7502b Score: 2.5 R03G\_08587  
Query: 1 TTGTTAATAAGTTCATGCAT 20  
\*|||:|||||||\*||\*||  
Sbjct: 2039 TACAGTTATTCAAGAAC-TA 2021  
>miR7502b Score: 2.5 R03G\_05880  
Query: 1 TTGTTAATAAGTTCATGCAT 20  
||||:|||||||\*||\*|||  
Sbjct: 290 AACAGTTATTCAAATA-GTA 272  
>miR7502b Score: 2.5 R03G\_03431  
Query: 1 TTGTTAATAAGTTCATGCA-T 20  
||:|:|||||||:|\*|\*|  
Sbjct: 3368 AATAGTTATTCAAGTATTTCA 3348  
>miR7502b Score: 2.2 R03G\_01163  
Query: 1 TTGTTAATAAGTTCATGCAT 20  
:|||:||:|||:||||\*||  
Sbjct: 335 GACAGTTGTTTCGAGTACTTA 316  
>miR951 Score: 0.0 R03G\_13220  
Query: 1 TGCTCTTGACGATCTGGCTACG 22  
|||||||  
Sbjct: 217 ACGAGAACTGCTAGACCGATGC 196  
>miR951 Score: 0.5 R03G\_13223  
Query: 1 TGCTCTTGACGATCTGGCTACG 22  
|||||||:|||||  
Sbjct: 217 ACGAGAACTGCTAGACTGATGC 196  
>miR951 Score: 2.5 R03G\_12464  
Query: 1 TGCTCTTGACGATCTGGCTACG 22  
||\*||||||\*|||||:|||||  
Sbjct: 217 ACAAGAACTGGTAGACTGATGC 196  
>miR951 Score: 1.0 R03G\_04119  
Query: 1 TGCTCTTGACGATCTGGCTACG 22  
|||||||\*|||||||  
Sbjct: 217 ACGAGAACTGGTAGACCGATGC 196  
>miR951 Score: 0.0 R03G\_04122  
Query: 1 TGCTCTTGACGATCTGGCTACG 22  
|||||||  
Sbjct: 217 ACGAGAACTGCTAGACCGATGC 196  
>miR951 Score: 0.0 R03G\_04124  
Query: 1 TGCTCTTGACGATCTGGCTACG 22  
|||||||  
Sbjct: 217 ACGAGAACTGCTAGACCGATGC 196  
>miR8741 Score: 0.0 R03G\_17257  
Query: 1 TGGCCTGAATGAATGATGATGG 22

|||||  
Sbjct: 2143 ACCGGACTTACTTACTACTACC 2122  
>miR8741 Score: 0.0 R03G\_16749  
Query: 1 TGGCCTGAATGAATGATGATGG 22  
|||||  
Sbjct: 2227 ACCGGACTTACTTACTACTACC 2206  
>miR8741 Score: 0.0 R03G\_16136  
Query: 1 TGGCCTGAATGAATGATGATGG 22  
|||||  
Sbjct: 2143 ACCGGACTTACTTACTACTACC 2122  
>miR8741 Score: 0.0 R03G\_15889  
Query: 1 TGGCCTGAATGAATGATGATGG 22  
|||||  
Sbjct: 2143 ACCGGACTTACTTACTACTACC 2122  
>miR8741 Score: 0.0 R03G\_13145  
Query: 1 TGGCCTGAATGAATGATGATGG 22  
|||||  
Sbjct: 2227 ACCGGACTTACTTACTACTACC 2206  
>miR8741 Score: 0.0 R03G\_13273  
Query: 1 TGGCCTGAATGAATGATGATGG 22  
|||||  
Sbjct: 2227 ACCGGACTTACTTACTACTACC 2206  
>miR8741 Score: 1.2 R03G\_10735  
Query: 1 TGGCCTGAATGAATGATGATGG 22  
:\*|||||  
Sbjct: 1672 GCGGACTTACTTACTACTACC 1651  
>miR8741 Score: 0.0 R03G\_10040  
Query: 1 TGGCCTGAATGAATGATGATGG 22  
|||||  
Sbjct: 817 ACCGGACTTACTTACTACTACC 796  
>miR8741 Score: 0.0 R03G\_10217  
Query: 1 TGGCCTGAATGAATGATGATGG 22  
|||||  
Sbjct: 2227 ACCGGACTTACTTACTACTACC 2206  
>miR8741 Score: 0.0 R03G\_09183  
Query: 1 TGGCCTGAATGAATGATGATGG 22  
|||||  
Sbjct: 1360 ACCGGACTTACTTACTACTACC 1339  
>miR8741 Score: 0.0 R03G\_07697  
Query: 1 TGGCCTGAATGAATGATGATGG 22  
|||||  
Sbjct: 553 ACCGGACTTACTTACTACTACC 532  
>miR8741 Score: 0.0 R03G\_04592  
Query: 1 TGGCCTGAATGAATGATGATGG 22  
|||||

Sbjct: 1399 ACCGGACTTACTTACTACTACC 1378  
>miR8741 Score: 0.0 R03G\_04681  
Query: 1 TGGCCTGAATGAATGATGATGG 22  
|||||  
Sbjct: 817 ACCGGACTTACTTACTACTACC 796  
>miR8741 Score: 0.0 R03G\_05424  
Query: 1 TGGCCTGAATGAATGATGATGG 22  
|||||  
Sbjct: 2143 ACCGGACTTACTTACTACTACC 2122  
>miR8741 Score: 0.0 R03G\_00289  
Query: 1 TGGCCTGAATGAATGATGATGG 22  
|||||  
Sbjct: 961 ACCGGACTTACTTACTACTACC 940  
>miR8741 Score: 0.0 R03G\_17351  
Query: 1 TGGCCTGAATGAATGATGATGG 22  
|||||  
Sbjct: 955 ACCGGACTTACTTACTACTACC 934  
>miR7716-3p Score: 2.2 R03G\_12741  
Query: 1 TTCTTCATCCTCCAGTAATGCC 22  
:|||||:|\*::\*|  
Sbjct: 1191 GAGAAGTAGGAGGTCGTGGTAG 1170  
>miR7716-3p Score: 2.2 R03G\_07958  
Query: 1 TTCTTCATCCTCCAGTAATGCC 22  
|||||:|\*:\*|  
Sbjct: 3090 AAGAAGTAGGAGGTTGT-GCAG 3070  
>miR7716-3p Score: 0.0 R03G\_17338  
Query: 1 TTCTTCATCCTCCAGTAATGCC 22  
|||||  
Sbjct: 24 AAGAAGTAGGAGGTCATTACGG 3  
>miR8603 Score: 2.5 R03G\_06113  
Query: 1 TGAGCTTGTGGTGAGCATTGT 21  
|||||:|\*||\*|||  
Sbjct: 1285 ACTCGAGCGCGACTCGT-ACA 1266  
>miR8603 Score: 2.5 R03G\_05236  
Query: 1 TGAGCTTGTGGTGAGCA-TTGT 21  
|:|:|||||:||||\*|||  
Sbjct: 36 ATTTGAACACTACTCGTTAACA 15  
>miR8603 Score: 2.5 R03G\_02600  
Query: 1 TGAGCTTGTGGTGAGCATTGT 21  
|||||\*||\*|||||:|:|  
Sbjct: 970 ACTCGAAAACGACTCGTGATA 950  
>miR8603 Score: 2.5 R03G\_03300  
Query: 1 TGAGCTTGTGGTGAGCATTGT 21  
|||||:|\*||\*|||  
Sbjct: 199 ACTCGAACACTACCCGT-TCA 180

>miR4401b Score: 2.5 R03G\_16714  
Query: 1 TCAAAGACGGTTGTGAGCAA 20  
||\*||||||||||||\*|:|||  
Sbjct: 206 AGATTCTGCCAACAGTTGTT 187

>miR4401b Score: 0.0 R03G\_14983  
Query: 1 TCAAAGACGGTTGTGAGCAA 20  
|||||||||||||||||||  
Sbjct: 653 AGTTTCTGCCAACACTCGTT 634

>miR4401b Score: 0.0 R03G\_13914  
Query: 1 TCAAAGACGGTTGTGAGCAA 20  
|||||||||||||||||||  
Sbjct: 848 AGTTTCTGCCAACACTCGTT 829

>miR4401b Score: 1.0 R03G\_12667  
Query: 1 TCAAAGACGGTTGTGAGCAA 20  
||\*|||||||||||||||||  
Sbjct: 218 AGGTTCTGCCAACACTCGTT 199

>miR4401b Score: 0.0 R03G\_12058  
Query: 1 TCAAAGACGGTTGTGAGCAA 20  
|||||||||||||||||||  
Sbjct: 848 AGTTTCTGCCAACACTCGTT 829

>miR4401b Score: 0.0 R03G\_10801  
Query: 1 TCAAAGACGGTTGTGAGCAA 20  
|||||||||||||||||||  
Sbjct: 653 AGTTTCTGCCAACACTCGTT 634

>miR4401b Score: 0.0 R03G\_09614  
Query: 1 TCAAAGACGGTTGTGAGCAA 20  
|||||||||||||||||||  
Sbjct: 179 AGTTTCTGCCAACACTCGTT 160

>miR4401b Score: 2.2 R03G\_08383  
Query: 1 TCAAAGACGGTTGTGAGCAA 20  
:|\*|||||||:|:|||||||  
Sbjct: 300 GGGTTCTGCCGACGCTCGTT 281

>miR4401b Score: 0.0 R03G\_02233  
Query: 1 TCAAAGACGGTTGTGAGCAA 20  
|||||||||||||||||||  
Sbjct: 377 AGTTTCTGCCAACACTCGTT 358

>miR4401b Score: 1.0 R03G\_03583  
Query: 1 TCAAAGACGGTTGTGAGCAA 20  
|||||||\*|||||||||||  
Sbjct: 653 AGTTTCTGACAACACTCGTT 634

>miR4401b Score: 2.5 R03G\_04116  
Query: 1 TCAAAGACGGTTGTGAGCAA 20  
||\*||||||||||||\*|:|||  
Sbjct: 213 AGATTCTGCCAACAGTTGTT 194

>miR4401b Score: 0.0 R03G\_17462

Query: 1 TCAAAGACGGTTGTGAGCAA 20  
|||||  
Sbjct: 980 AGTTTCTGCCAACACTCGTT 961  
>miR4401b Score: 0.0 R03G\_17451  
Query: 1 TCAAAGACGGTTGTGAGCAA 20  
|||||  
Sbjct: 89 AGTTTCTGCCAACACTCGTT 70  
>miR158-3p Score: 2.0 R03G\_15863  
Query: 1 TTTCCAAATGTAGACAAAGC 20  
|||\*||\*||  
Sbjct: 29 AAAAGTCTACATCTGTTTCG 10  
>miR158-3p Score: 2.0 R03G\_15573  
Query: 1 TTTCCAAATGTAGACAAAGC 20  
|||\*||\*||  
Sbjct: 3101 AAAAGTCTACATCTGTTTCG 3082  
>miR158-3p Score: 2.0 R03G\_13849  
Query: 1 TTTCCAAATGTAGACAAAGC 20  
|||\*||\*||  
Sbjct: 3101 AAAAGTCTACATCTGTTTCG 3082  
>miR158-3p Score: 2.0 R03G\_11945  
Query: 1 TTTCCAAATGTAGACAAAGC 20  
|||\*||\*||  
Sbjct: 29 AAAAGTCTACATCTGTTTCG 10  
>miR158-3p Score: 2.0 R03G\_10420  
Query: 1 TTTCCAAATGTAGACAAAGC 20  
|||\*||\*||  
Sbjct: 3101 AAAAGTCTACATCTGTTTCG 3082  
>miR158-3p Score: 2.5 R03G\_10923  
Query: 1 TTTCCAAATGTAGACAAAGC 20  
:||\*||\*||\*:  
Sbjct: 3134 GAACGTTTACATCTGTTATA 3115  
>miR158-3p Score: 2.0 R03G\_10991  
Query: 1 TTTCCAAATGTAGACAAAGC 20  
|||\*||\*||  
Sbjct: 3101 AAAAGTCTACATCTGTTTCG 3082  
>miR158-3p Score: 2.5 R03G\_09886  
Query: 1 TTTCCAAATGTAGACAAAGC 20  
\*|||\*||\*||\*||  
Sbjct: 1726 TAAGCTTTACAACACTGTTTCG 1707  
>miR158-3p Score: 2.5 R03G\_07325  
Query: 1 TTTCCAAATGTAGACAAAGC 20  
|||\*||\*||\*:  
Sbjct: 1325 AAAAGTTTACATTGGTTTCG 1306  
>miR158-3p Score: 2.0 R03G\_05865  
Query: 1 TTTCCAAATGTAGACAAAGC 20



|||\*||\*|||||||||||||  
Sbjct: 2753 AAAAGTCTACATCTGTTTCG 2734  
>miR158-3p Score: 2.0 R03G\_06502  
Query: 1 TTTCCAAATGTAGACAAAGC 20  
|||\*||\*|||||||||||||  
Sbjct: 2978 AAAAGTCTACATCTGTTTCG 2959  
>miR158-3p Score: 2.0 R03G\_02707  
Query: 1 TTTCCAAATGTAGACAAAGC 20  
|||\*||\*|||||||||||||  
Sbjct: 650 AAAAGTCTACATCTGTTTCG 631  
>miR158-3p Score: 2.0 R03G\_02966  
Query: 1 TTTCCAAATGTAGACAAAGC 20  
|||\*||\*|||||||||||||  
Sbjct: 2372 AAAAGTCTACATCTGTTTCG 2353  
>miR158-3p Score: 2.0 R03G\_03749  
Query: 1 TTTCCAAATGTAGACAAAGC 20  
|||\*||\*|||||||||||||  
Sbjct: 3101 AAAAGTCTACATCTGTTTCG 3082  
>miR158-3p Score: 2.5 R03G\_00647  
Query: 1 TTTCCAAATGTAGACAAAGC 20  
\*|||||||\*||:||||\*|  
Sbjct: 4144 TAAGGTTTAGATTTGTTT-G 4126  
>miR158-3p Score: 2.0 R03G\_01733  
Query: 1 TTTCCAAATGTAGACAAAGC 20  
|||\*||\*|||||||||||||  
Sbjct: 2903 AAAAGTCTACATCTGTTTCG 2884  
>miR158-3p Score: 2.0 R03G\_01944  
Query: 1 TTTCCAAATGTAGACAAAGC 20  
|||\*||\*|||||||||||||  
Sbjct: 3101 AAAAGTCTACATCTGTTTCG 3082  
>miR158-3p Score: 1.0 R03G\_02126  
Query: 1 TTTCCAAATGTAGACAAA-GC 20  
|||||||:|||||||\*||  
Sbjct: 540 AAAGGTTTGCATCTGTTTACG 520  
>miR158-3p Score: 2.0 R03G\_17446  
Query: 1 TTTCCAAATGTAGACAAAGC 20  
|||\*||\*|||||||||||||  
Sbjct: 3101 AAAAGTCTACATCTGTTTCG 3082  
>miR158-3p Score: 2.0 R03G\_17287  
Query: 1 TTTCCAAATGTAGACAAAGC 20  
|||\*||\*|||||||||||||  
Sbjct: 3101 AAAAGTCTACATCTGTTTCG 3082  
>miR1146 Score: 2.5 R03G\_05699  
Query: 1 TTGGGTCCGACGGGAAGTCTT 21  
|||||||:|:|\*|||||||

Sbjct: 101 AACCCAGGTTGTTGTTTCAGAA 81  
>miR5219 Score: 0.5 R03G\_15231  
Query: 1 TCTGGACTCTCAGCTGCTGCGT 22  
|||||\*||  
Sbjct: 554 AGACCTGAGAGTCGACGACACA 533  
>miR5219 Score: 0.5 R03G\_10585  
Query: 1 TCTGGACTCTCAGCTGCTGCGT 22  
|||||\*||  
Sbjct: 155 AGACCTGAGAGTCGACGACACA 134  
>miR5219 Score: 1.0 R03G\_10900  
Query: 1 TCTGGACTCTCAGCTGCTGCGT 22  
|||||\*|||||  
Sbjct: 110 AGACCTAAGAGTCGACGACGCA 89  
>miR7729a-3p Score: 2.0 R03G\_16734  
Query: 1 TAGCAATGGGGTTGTTGGAGGA 22  
||:||||:||||:|||||\*|||  
Sbjct: 94 ATTGTTATCCCGACAACCCCT 73  
>miR7729a-3p Score: 2.0 R03G\_16712  
Query: 1 TAGCAATGGGGTTGTTGGAGGA 22  
||:||||:||||:|||||\*|||  
Sbjct: 94 ATTGTTATCCCGACAACCCCT 73  
>miR7729a-3p Score: 0.5 R03G\_15157  
Query: 1 TAGCAATGGGGTTGTTGGAGGA 22  
||:|||||\*|||  
Sbjct: 94 ATTGTTACCCCAACAACCTCCT 73  
>miR7729a-3p Score: 0.0 R03G\_14637  
Query: 1 TAGCAATGGGGTTGTTGGAGGA 22  
|||||\*|||  
Sbjct: 94 ATCGTTACCCCAACAACCTCCT 73  
>miR7729a-3p Score: 0.5 R03G\_13735  
Query: 1 TAGCAATGGGGTTGTTGGAGGA 22  
||:|||||\*|||  
Sbjct: 94 ATTGTTACCCCAACAACCTCCT 73  
>miR7729a-3p Score: 2.0 R03G\_12957  
Query: 1 TAGCAATGGGGTTGTTGGAGGA 22  
||:||||:||||:|||||\*|||  
Sbjct: 94 ATTGTTATCCCGACAACCCCT 73  
>miR7729a-3p Score: 2.0 R03G\_12972  
Query: 1 TAGCAATGGGGTTGTTGGAGGA 22  
||:||||:||||:|||||\*|||  
Sbjct: 94 ATTGTTATCCCGACAACCCCT 73  
>miR7729a-3p Score: 0.5 R03G\_12005  
Query: 1 TAGCAATGGGGTTGTTGGAGGA 22  
||:|||||\*|||  
Sbjct: 94 ATTGTTACCCCAACAACCTCCT 73

>miR7729a-3p Score: 0.5 R03G\_12079  
Query: 1 TAGCAATGGGGTTGTTGGAGGA 22  
||:||||||||||||||||||  
Sbjct: 94 ATTGTTACCCCAACAACCTCCT 73

>miR7729a-3p Score: 0.5 R03G\_12179  
Query: 1 TAGCAATGGGGTTGTTGGAGGA 22  
||:||||||||||||||||||  
Sbjct: 94 ATTGTTACCCCAACAACCTCCT 73

>miR7729a-3p Score: 2.0 R03G\_10525  
Query: 1 TAGCAATGGGGTTGTTGGAGGA 22  
||:||||:||||:|||||\*|||  
Sbjct: 94 ATTGTTATCCCGACAACCCCT 73

>miR7729a-3p Score: 2.0 R03G\_10531  
Query: 1 TAGCAATGGGGTTGTTGGAGGA 22  
||:||||:||||:|||||\*|||  
Sbjct: 94 ATTGTTATCCCGACAACCCCT 73

>miR7729a-3p Score: 2.0 R03G\_10545  
Query: 1 TAGCAATGGGGTTGTTGGAGGA 22  
||:||||:||||:|||||\*|||  
Sbjct: 94 ATTGTTATCCCGACAACCCCT 73

>miR7729a-3p Score: 2.0 R03G\_07110  
Query: 1 TAGCAATGGGGTTGTTGGAGGA 22  
||:||||:||||:|||||\*|||  
Sbjct: 94 ATTGTTATCCCGACAACCCCT 73

>miR7729a-3p Score: 2.0 R03G\_07676  
Query: 1 TAGCAATGGGGTTGTTGGAGGA 22  
||:||||:||||:|||||\*|||  
Sbjct: 94 ATTGTTATCCCGACAACCCCT 73

>miR7729a-3p Score: 2.0 R03G\_07678  
Query: 1 TAGCAATGGGGTTGTTGGAGGA 22  
||:||||:||||:|||||\*|||  
Sbjct: 94 ATTGTTATCCCGACAACCCCT 73

>miR7729a-3p Score: 2.0 R03G\_07868  
Query: 1 TAGCAATGGGGTTGTTGGAGGA 22  
||:||||:||||:|||||\*|||  
Sbjct: 94 ATTGTTATCCCGACAACCCCT 73

>miR7729a-3p Score: 2.0 R03G\_05523  
Query: 1 TAGCAATGGGGTTGTTGGAGGA 22  
||:||||:||||:|||||\*|||  
Sbjct: 94 ATTGTTATCCCGACAACCCCT 73

>miR7729a-3p Score: 0.5 R03G\_05928  
Query: 1 TAGCAATGGGGTTGTTGGAGGA 22  
||:||||||||||||||||||  
Sbjct: 94 ATTGTTACCCCAACAACCTCCT 73

>miR7729a-3p Score: 1.5 R03G\_04676

Query: 1 TAGCAATGGGGTTGTTGGAGGA 22  
||:||||\*|||||||  
Sbjct: 94 ATTGTTAACCCAACAACCTCCT 73  
>miR7729a-3p Score: 2.0 R03G\_03767  
Query: 1 TAGCAATGGGGTTGTTGGAGGA 22  
||:||||:||||:||||\*|||  
Sbjct: 94 ATTGTTATCCCGACAACCCCT 73  
>miR7729a-3p Score: 2.0 R03G\_00430  
Query: 1 TAGCAATGGGGTTGTTGGAGGA 22  
:|||||||:|\*|||||||:|  
Sbjct: 73 GTCGTTACCTCCACAACCTTCT 52  
>miR7729a-3p Score: 0.0 R03G\_01201  
Query: 1 TAGCAATGGGGTTGTTGGAGGA 22  
|||||||  
Sbjct: 94 ATCGTTACCCAACAACCTCCT 73  
>miR7729a-3p Score: 2.0 R03G\_01949  
Query: 1 TAGCAATGGGGTTGTTGGAGGA 22  
||:||||:||||:||||\*|||  
Sbjct: 94 ATTGTTATCCCGACAACCCCT 73  
>miR7729a-3p Score: 2.0 R03G\_01968  
Query: 1 TAGCAATGGGGTTGTTGGAGGA 22  
||:||||:||||:||||\*|||  
Sbjct: 94 ATTGTTATCCCGACAACCCCT 73  
>miR7729a-3p Score: 2.0 R03G\_17380  
Query: 1 TAGCAATGGGGTTGTTGGAGGA 22  
||:||||:||||:||||\*|||  
Sbjct: 94 ATTGTTATCCCGACAACCCCT 73  
>miR8762d Score: 2.5 R03G\_17223  
Query: 1 TTGTAACTTTGATCGATGTCT 22  
||||\*\*|||||||\*|  
Sbjct: 478 AACACCTGAAACTAGCTACAAA 457  
>miR8762d Score: 2.5 R03G\_16725  
Query: 1 TTGTAACTTTGATCGATGTCT 22  
||||\*\*|||||||\*|  
Sbjct: 496 AACACCTGAAACTAGCTACAAA 475  
>miR8762d Score: 2.5 R03G\_16742  
Query: 1 TTGTAACTTTGATCGATGTCT 22  
||||\*\*|||||||\*|  
Sbjct: 754 AACACCTGAAACTAGCTACAAA 733  
>miR8762d Score: 2.5 R03G\_16706  
Query: 1 TTGTAACTTTGATCGATGTCT 22  
||||\*\*|||||||\*|  
Sbjct: 478 AACACCTGAAACTAGCTACAAA 457  
>miR8762d Score: 2.5 R03G\_16372  
Query: 1 TTGTAACTTTGATCGATGTCT 22

||||\*\*||||||||||||||||\*|  
Sbjct: 754 AACACCTGAAACTAGCTACAAA 733  
>miR8762d Score: 2.5 R03G\_16420  
Query: 1 TTGTAAACTTTGATCGATGTCT 22  
||||\*\*||||||||||||||||\*|  
Sbjct: 505 AACACCTGAAACTAGCTACAAA 484  
>miR8762d Score: 2.5 R03G\_16123  
Query: 1 TTGTAAACTTTGATCGATGTCT 22  
||||\*\*||||||||||||||||\*|  
Sbjct: 754 AACACCTGAAACTAGCTACAAA 733  
>miR8762d Score: 2.5 R03G\_15271  
Query: 1 TTGTAAACTTTGATCGATGTCT 22  
||||\*\*||||||||||||||||\*|  
Sbjct: 754 AACACCTGAAACTAGCTACAAA 733  
>miR8762d Score: 2.5 R03G\_15282  
Query: 1 TTGTAAACTTTGATCGATGTCT 22  
||||\*\*||||||||||||||||\*|  
Sbjct: 478 AACACCTGAAACTAGCTACAAA 457  
>miR8762d Score: 2.5 R03G\_13714  
Query: 1 TTGTAAACTTTGATCGATGTCT 22  
||||\*\*||||||||||||||||\*|  
Sbjct: 754 AACACCTGAAACTAGCTACAAA 733  
>miR8762d Score: 1.5 R03G\_13852  
Query: 1 TTGTAAACTTTGATCGATGTCT 22  
||||\*||||||||||||||||\*|  
Sbjct: 505 AACACTTGAAACTAGCTACAAA 484  
>miR8762d Score: 2.5 R03G\_12663  
Query: 1 TTGTAAACTTTGATCGATGTCT 22  
||||\*\*||||||||||||||||\*|  
Sbjct: 589 AACACCTGAAACTAGCTACAAA 568  
>miR8762d Score: 2.5 R03G\_11966  
Query: 1 TTGTAAACTTTGATCGATGTCT 22  
||||\*||||||||||||\*|||\*|  
Sbjct: 754 AACATCTGAAACTAGCCACAAA 733  
>miR8762d Score: 2.5 R03G\_11781  
Query: 1 TTGTAAACTTTGATCGATGTCT 22  
||||\*\*||||||||||||||||\*|  
Sbjct: 649 AACACCTGAAACTAGCTACAAA 628  
>miR8762d Score: 2.5 R03G\_10729  
Query: 1 TTGTAAACTTTGATCGATGTCT 22  
||||\*||||||||||||\*|||\*|  
Sbjct: 754 AACATCTGAAACTAGCCACAAA 733  
>miR8762d Score: 1.5 R03G\_10771  
Query: 1 TTGTAAACTTTGATCGATGTCT 22  
||||\*||||||||||||||||\*|

Sbjct: 505 AACACTTGAAACTAGCTACAAA 484  
>miR8762d Score: 2.5 R03G\_09193  
Query: 1 TTGTAAACTTTGATCGATGTCT 22  
||||\*\*||||||||||||||||\*|

Sbjct: 478 AACACCTGAAACTAGCTACAAA 457  
>miR8762d Score: 2.5 R03G\_07137  
Query: 1 TTGTAAACTTTGATCGATGTCT 22  
||||\*\*||||||||||||||||\*|

Sbjct: 754 AACACCTGAAACTAGCTACAAA 733  
>miR8762d Score: 2.5 R03G\_07702  
Query: 1 TTGTAAACTTTGATCGATGTCT 22  
||||\*\*||||||||||||||||\*|

Sbjct: 505 AACACCTGAAACTAGCTACAAA 484  
>miR8762d Score: 2.5 R03G\_07705  
Query: 1 TTGTAAACTTTGATCGATGTCT 22  
||||\*\*||||||||||||||||\*|

Sbjct: 754 AACACCTGAAACTAGCTACAAA 733  
>miR8762d Score: 1.5 R03G\_07739  
Query: 1 TTGTAAACTTTGATCGATGTCT 22  
||||\*||||||||||||||||\*|

Sbjct: 505 AACACTTGAAACTAGCTACAAA 484  
>miR8762d Score: 2.5 R03G\_07867  
Query: 1 TTGTAAACTTTGATCGATGTCT 22  
||||\*\*||||||||||||||||\*|

Sbjct: 505 AACACCTGAAACTAGCTACAAA 484  
>miR8762d Score: 2.5 R03G\_05640  
Query: 1 TTGTAAACTTTGATCGATGTCT 22  
||||\*\*||||||||||||||||\*|

Sbjct: 649 AACACCTGAAACTAGCTACAAA 628  
>miR8762d Score: 2.5 R03G\_05921  
Query: 1 TTGTAAACTTTGATCGATGTCT 22  
||||\*||||||||||||\*|||\*|

Sbjct: 754 AACATCTGAAACTAGCCACAAA 733  
>miR8762d Score: 2.5 R03G\_05939  
Query: 1 TTGTAAACTTTGATCGATGTCT 22  
||||\*||||||||||||\*|||\*|

Sbjct: 754 AACATCTGAAACTAGCCACAAA 733  
>miR8762d Score: 2.5 R03G\_05953  
Query: 1 TTGTAAACTTTGATCGATGTCT 22  
||||\*||||||||||||\*|||\*|

Sbjct: 754 AACATCTGAAACTAGCCACAAA 733  
>miR8762d Score: 2.5 R03G\_04327  
Query: 1 TTGTAAACTTTGATCGATGTCT 22  
||||\*|||\*||||||||||\*||

Sbjct: 864 AACATCTGACACTAGCTACCGA 843

>miR8762d Score: 2.5 R03G\_04674  
Query: 1 TTGTAAACTTTGATCGATGTCT 22  
||||\*\*||||||||||||||||\*|  
Sbjct: 505 AACACCTGAAACTAGCTACAAA 484

>miR8762d Score: 2.5 R03G\_04695  
Query: 1 TTGTAAACTTTGATCGATGTCT 22  
||||\*\*||||||||||||||||\*|  
Sbjct: 544 AACACCTGAAACTAGCTACAAA 523

>miR8762d Score: 2.5 R03G\_05268  
Query: 1 TTGTAAACTTTGATCGATGTCT 22  
||||\*\*||||||||||||||||\*|  
Sbjct: 754 AACACCTGAAACTAGCTACAAA 733

>miR8762d Score: 2.5 R03G\_02824  
Query: 1 TTGTAAACTTTGATCGATGTCT 22  
||||\*\*||||||||||||||||\*|  
Sbjct: 754 AACACCTGAAACTAGCTACAAA 733

>miR8762d Score: 2.5 R03G\_01328  
Query: 1 TTGTAAACTTTGATCGATGTCT 22  
||||\*\*||||||||||||||||\*|  
Sbjct: 754 AACACCTGAAACTAGCTACAAA 733

>miR8762d Score: 2.5 R03G\_01962  
Query: 1 TTGTAAACTTTGATCGATGTCT 22  
||||\*\*||||||||||||||||\*|  
Sbjct: 505 AACACCTGAAACTAGCTACAAA 484

>miR8762d Score: 2.5 R03G\_17449  
Query: 1 TTGTAAACTTTGATCGATGTCT 22  
||||\*||||||||||||\*||\*|  
Sbjct: 754 AACATCTGAAACTAGCCACAAA 733

>miR8762d Score: 2.5 R03G\_17416  
Query: 1 TTGTAAACTTTGATCGATGTCT 22  
||||\*\*||||||||||||||||\*|  
Sbjct: 754 AACACCTGAAACTAGCTACAAA 733

>miR8762d Score: 2.5 R03G\_17399  
Query: 1 TTGTAAACTTTGATCGATGTCT 22  
||||\*\*||||||||||||||||\*|  
Sbjct: 754 AACACCTGAAACTAGCTACAAA 733

>miR8762d Score: 2.5 R03G\_17387  
Query: 1 TTGTAAACTTTGATCGATGTCT 22  
||||\*\*||||||||||||||||\*|  
Sbjct: 754 AACACCTGAAACTAGCTACAAA 733

>miR8762d Score: 2.5 R03G\_17355  
Query: 1 TTGTAAACTTTGATCGATGTCT 22  
||||\*\*||||||||||||||||\*|  
Sbjct: 589 AACACCTGAAACTAGCTACAAA 568

>miR8762d Score: 2.5 R03G\_17291

Query: 1 TTGTAACTTTGATCGATGTCT 22  
||||\*\*||||||||||||||\*|  
Sbjct: 754 AACACCTGAACTAGCTACAAA 733  
>miR1051-3p Score: 0.5 R03G\_17260  
Query: 1 TTCCCGTACTTGAACCCAC 19  
||||:||||||||||||||  
Sbjct: 1036 AAGGGTATGAACTTGGGTG 1018  
>miR1051-3p Score: 0.0 R03G\_16733  
Query: 1 TTCCCGTACTTGAACCCAC 19  
||||||||||||||||||  
Sbjct: 1157 AAGGGCATGAACTTGGGTG 1139  
>miR1051-3p Score: 0.0 R03G\_16812  
Query: 1 TTCCCGTACTTGAACCCAC 19  
||||||||||||||||||  
Sbjct: 1157 AAGGGCATGAACTTGGGTG 1139  
>miR1051-3p Score: 0.0 R03G\_15270  
Query: 1 TTCCCGTACTTGAACCCAC 19  
||||||||||||||||||  
Sbjct: 206 AAGGGCATGAACTTGGGTG 188  
>miR1051-3p Score: 0.0 R03G\_14791  
Query: 1 TTCCCGTACTTGAACCCAC 19  
||||||||||||||||||  
Sbjct: 1157 AAGGGCATGAACTTGGGTG 1139  
>miR1051-3p Score: 0.0 R03G\_14798  
Query: 1 TTCCCGTACTTGAACCCAC 19  
||||||||||||||||||  
Sbjct: 1157 AAGGGCATGAACTTGGGTG 1139  
>miR1051-3p Score: 0.0 R03G\_09180  
Query: 1 TTCCCGTACTTGAACCCAC 19  
||||||||||||||||||  
Sbjct: 1157 AAGGGCATGAACTTGGGTG 1139  
>miR1051-3p Score: 0.0 R03G\_09189  
Query: 1 TTCCCGTACTTGAACCCAC 19  
||||||||||||||||||  
Sbjct: 1157 AAGGGCATGAACTTGGGTG 1139  
>miR1051-3p Score: 0.0 R03G\_06734  
Query: 1 TTCCCGTACTTGAACCCAC 19  
||||||||||||||||||  
Sbjct: 461 AAGGGCATGAACTTGGGTG 443  
>miR1216 Score: 0.0 R03G\_17261  
Query: 1 TGATGGGTTAGCGCTTGAC 20  
||||||||||||||||||  
Sbjct: 183 ACTACCCAATCGCGAACATG 164  
>miR1216 Score: 0.0 R03G\_16732  
Query: 1 TGATGGGTTAGCGCTTGAC 20



|||||  
Sbjct: 183 ACTACCCAATCGCGAACATG 164  
>miR1216 Score: 0.0 R03G\_16813  
Query: 1 TGATGGGTTAGCGCTTGTAC 20

|||||  
Sbjct: 183 ACTACCCAATCGCGAACATG 164  
>miR1216 Score: 0.0 R03G\_14788  
Query: 1 TGATGGGTTAGCGCTTGTAC 20

|||||  
Sbjct: 116 ACTACCCAATCGCGAACATG 97  
>miR1216 Score: 0.0 R03G\_14792  
Query: 1 TGATGGGTTAGCGCTTGTAC 20

|||||  
Sbjct: 183 ACTACCCAATCGCGAACATG 164  
>miR1216 Score: 0.0 R03G\_14799  
Query: 1 TGATGGGTTAGCGCTTGTAC 20

|||||  
Sbjct: 183 ACTACCCAATCGCGAACATG 164  
>miR1216 Score: 0.0 R03G\_14801  
Query: 1 TGATGGGTTAGCGCTTGTAC 20

|||||  
Sbjct: 116 ACTACCCAATCGCGAACATG 97  
>miR1216 Score: 0.0 R03G\_09181  
Query: 1 TGATGGGTTAGCGCTTGTAC 20

|||||  
Sbjct: 183 ACTACCCAATCGCGAACATG 164  
>miR1216 Score: 0.0 R03G\_09190  
Query: 1 TGATGGGTTAGCGCTTGTAC 20

|||||  
Sbjct: 183 ACTACCCAATCGCGAACATG 164  
>miR2612 Score: 2.5 R03G\_13972  
Query: 1 TGATAGTGGCAGTAGTATCAG 21  
|:\*|||:|||||\*||

Sbjct: 88 ATCATCATCGTCATCATCGTC 68  
>miR2612 Score: 2.5 R03G\_13081  
Query: 1 TGATAGTGGCAGTAGTATCAG 21  
|:\*|||:|||||\*||

Sbjct: 574 ATCATCATCGTCATCATACTC 554  
>miR2612 Score: 0.0 R03G\_13221  
Query: 1 TGATAGTGGCAGTAGTATCAG 21

|||||  
Sbjct: 787 ACTATCACCGTCATCATAGTC 767  
>miR2612 Score: 1.0 R03G\_13224  
Query: 1 TGATAGTGGCAGTAGTATCAG 21  
|||||\*|||||

Sbjct: 787 ACTATCACCGTCACCATAGTC 767  
>miR2612 Score: 2.5 R03G\_11742  
Query: 1 TGATAGTGGCAGTAGTATCAG 21  
|||:|:||||\*|||||\*|  
Sbjct: 823 ACTGTCGCCGTCTTCATAGAC 803  
>miR2612 Score: 2.5 R03G\_10462  
Query: 1 TGATAGTGGCAGTAGTATCAG 21  
|:|||||:|||||||\*|\*\*  
Sbjct: 379 ATTATCATCGTCATCATCGAA 359  
>miR2612 Score: 2.2 R03G\_11036  
Query: 1 TGATAGTGGCAGTAGTATCAG 21  
|||||:|:||||:||||:|  
Sbjct: 1294 ACTATTATCGTTGTCATGGTC 1274  
>miR2612 Score: 2.0 R03G\_08172  
Query: 1 TGATAGTGGCAGTAGTATCAG 21  
||||||:|:|:|||||||\*  
Sbjct: 625 ACTATCGTCGTTATCATAGTA 605  
>miR2612 Score: 2.5 R03G\_09062  
Query: 1 TGATAGTGGCAGTAGTATCAG 21  
||||||:|:|:||||\*\*||  
Sbjct: 64 ACTATCGTCGTCGTCATCATC 44  
>miR2612 Score: 2.5 R03G\_04278  
Query: 1 TGATAGTGGCAGTAGTATCAG 21  
|:||||:|:|||||:|\*|||  
Sbjct: 1357 ATTATCGTCGTCATCGTCGTC 1337  
>miR2612 Score: 2.2 R03G\_02581  
Query: 1 TGATAGTGGCAGTAGTATCAG 21  
|||\*|||||||:||||\*|:  
Sbjct: 163 ACTCTCACCGTCGTCATATTT 143  
>miR2612 Score: 2.5 R03G\_02911  
Query: 1 TGATAGTGGCAGTAGTATCAG 21  
||||||:|:|||||\*|:||||  
Sbjct: 133 ACTATCGTCGTCATAGTAGTC 113  
>miR2612 Score: 2.0 R03G\_03005  
Query: 1 TGATAGTGGCAGTAGTATCAG 21  
::|||||||:|\*||:  
Sbjct: 127 GTTATCACCGTCATTATTGTT 107  
>miR2612 Score: 2.5 R03G\_03352  
Query: 1 TGATAGTGGCAGTAGTATCAG 21  
||||||:|\*|||||\*||  
Sbjct: 739 ACTATCATCATCATCATTATC 719  
>miR2612 Score: 2.2 R03G\_03879  
Query: 1 TGATAGTGGCAGTAGTATCAG 21  
|:||||:|:||||:|:|:  
Sbjct: 136 ATTATCATCGTCATTGTAGTT 116

>miR2612 Score: 1.0 R03G\_04120  
Query: 1 TGATAGTGGCAGTAGTATCAG 21  
|||||\*|||||  
Sbjct: 787 ACTATCACCGTCACCATAGTC 767

>miR2612 Score: 1.0 R03G\_04123  
Query: 1 TGATAGTGGCAGTAGTATCAG 21  
|||||\*|||||  
Sbjct: 787 ACTATCACCGTCACCATAGTC 767

>miR2612 Score: 2.5 R03G\_00855  
Query: 1 TGATAGTGGCAGTAGTATCAG 21  
|||:|:|:|:|\*||  
Sbjct: 1111 ACTATTACTGTCGTCGTA-TC 1092

>miR2612 Score: 2.5 R03G\_00887  
Query: 1 TGATAGTGGCAGTAGTATCAG 21  
|:\*|||||\*||  
Sbjct: 367 ATCATCACCGTCATCAT-CTC 348

>miR2612 Score: 2.5 R03G\_01770  
Query: 1 TGATAGTGGCAGTAGTATCAG 21  
|:|:|:|:|\*||  
Sbjct: 637 ATTGTCATCGTCGTCATTGTC 617

>miR2612 Score: 1.0 R03G\_17093  
Query: 1 TGATAGTGGCAGTAGTATCAG 21  
|||||\*|||||  
Sbjct: 547 ACTATCACCGTCACCATAGTC 527

>miR6476a Score: 2.5 R03G\_04527  
Query: 1 TCGGTAGGTGATGAACATGA 20  
||:||||:||||\*||\*|  
Sbjct: 799 AGTCATCTACTACTAGTAGT 780

>miR1446 Score: 0.0 R03G\_14986  
Query: 1 TTCTGAAATCTCTGCGCATCAT 22  
|||||  
Sbjct: 1339 AAGACTTTAGAGACGCGTAGTA 1318

>miR1446 Score: 0.0 R03G\_12063  
Query: 1 TTCTGAAATCTCTGCGCATCAT 22  
|||||  
Sbjct: 835 AAGACTTTAGAGACGCGTAGTA 814

>miR1446 Score: 0.0 R03G\_12187  
Query: 1 TTCTGAAATCTCTGCGCATCAT 22  
|||||  
Sbjct: 1339 AAGACTTTAGAGACGCGTAGTA 1318

>miR1446 Score: 0.0 R03G\_07714  
Query: 1 TTCTGAAATCTCTGCGCATCAT 22  
|||||  
Sbjct: 1141 AAGACTTTAGAGACGCGTAGTA 1120

>miR1446 Score: 0.0 R03G\_03622

Query: 1 TTCTGAAATCTCTGCGCATCAT 22  
|||||  
Sbjct: 1069 AAGACTTTAGAGACGCGTAGTA 1048  
>miR1446 Score: 0.0 R03G\_04206  
Query: 1 TTCTGAAATCTCTGCGCATCAT 22  
|||||  
Sbjct: 388 AAGACTTTAGAGACGCGTAGTA 367  
>miR5021 Score: 2.5 R03G\_14233  
Query: 1 TGACGATAGAAGAAGGAAAA 20  
\*:\*|:|||||  
Sbjct: 1123 CTAGTTATCTTCTTCCTTTT 1104  
>miR5021 Score: 0.0 R03G\_12949  
Query: 1 TGACGATAGAAGAAGGAAAA 20  
|||||  
Sbjct: 721 ACTGCTATCTTCTTCCTTTT 702  
>miR5021 Score: 2.0 R03G\_10250  
Query: 1 TGACGATAGAAGAAGGAAAA 20  
|||\*||\*|  
Sbjct: 256 ACTGATACCTTCTTCCTTTT 237  
>miR5021 Score: 2.5 R03G\_09758  
Query: 1 TGACGATAGAAGAAGGAA-AA 20  
|||\*||:|||||:|\*||  
Sbjct: 1978 ACTACTGTCTTCTTCTTTGTT 1958  
>miR5021 Score: 2.5 R03G\_08015  
Query: 1 TGACGATAGAAGAAGGAAAA 20  
||||:\*|  
Sbjct: 1231 ACTGTAATCTTCTTCTTTAT 1212  
>miR5021 Score: 2.5 R03G\_04304  
Query: 1 TGACGATAGAAGAAGGAAAA 20  
|||||:\*|  
Sbjct: 1141 ACTGCTGGTTTCTTCCTTGT 1122  
>miR5021 Score: 0.0 R03G\_04050  
Query: 1 TGACGATAGAAGAAGGAAAA 20  
|||||  
Sbjct: 1276 ACTGCTATCTTCTTCCTTTT 1257  
>miR5021 Score: 0.0 R03G\_00301  
Query: 1 TGACGATAGAAGAAGGAAAA 20  
|||||  
Sbjct: 2560 ACTGCTATCTTCTTCCTTTT 2541  
>miR6025e Score: 2.0 R03G\_17214  
Query: 1 TGCCATTATAGATCTGACATGC 22  
|||||:|\*|:|||||  
Sbjct: 622 ACGGTAGTATGTGGACTGTACG 601  
>miR6025e Score: 0.0 R03G\_17223  
Query: 1 TGCCATTATAGATCTGACATGC 22

|||||  
Sbjct: 346 ACGGTAATATCTAGACTGTACG 325  
>miR6025e Score: 0.5 R03G\_17017  
Query: 1 TGCCATTATAGATCTGACATGC 22  
|:|||||  
Sbjct: 622 ATGGTAATATCTAGACTGTACG 601  
>miR6025e Score: 1.0 R03G\_16725  
Query: 1 TGCCATTATAGATCTGACATGC 22  
|:||||:|||||  
Sbjct: 364 ATGGTAGTATCTAGACTGTACG 343  
>miR6025e Score: 0.0 R03G\_16742  
Query: 1 TGCCATTATAGATCTGACATGC 22  
|||||  
Sbjct: 622 ACGGTAATATCTAGACTGTACG 601  
>miR6025e Score: 1.5 R03G\_16689  
Query: 1 TGCCATTATAGATCTGACATGC 22  
|||||:||||\*|||||  
Sbjct: 622 ACGGTAGTATATAGACTGTACG 601  
>miR6025e Score: 2.5 R03G\_16698  
Query: 1 TGCCATTATAGATCTGACATGC 22  
|:||||:||||\*|||||\*  
Sbjct: 619 ATGGTAGTATCCAGACTGTACA 598  
>miR6025e Score: 0.0 R03G\_16706  
Query: 1 TGCCATTATAGATCTGACATGC 22  
|||||  
Sbjct: 346 ACGGTAATATCTAGACTGTACG 325  
>miR6025e Score: 0.0 R03G\_16372  
Query: 1 TGCCATTATAGATCTGACATGC 22  
|||||  
Sbjct: 622 ACGGTAATATCTAGACTGTACG 601  
>miR6025e Score: 0.5 R03G\_16420  
Query: 1 TGCCATTATAGATCTGACATGC 22  
|:|||||  
Sbjct: 373 ATGGTAATATCTAGACTGTACG 352  
>miR6025e Score: 0.5 R03G\_16123  
Query: 1 TGCCATTATAGATCTGACATGC 22  
|||||:|||||  
Sbjct: 622 ACGGTAGTATCTAGACTGTACG 601  
>miR6025e Score: 2.0 R03G\_15866  
Query: 1 TGCCATTATAGATCTGACATGC 22  
|||||:||||\*|:|||||  
Sbjct: 346 ACGGTAGTATGTGGACTGTACG 325  
>miR6025e Score: 1.0 R03G\_15271  
Query: 1 TGCCATTATAGATCTGACATGC 22  
|:||||:|||||

Sbjct: 622 ATGGTAGTATCTAGACTGTACG 601  
>miR6025e Score: 0.5 R03G\_15282  
Query: 1 TGCCATTATAGATCTGACATGC 22  
|:|||||||||||||||||||||

Sbjct: 346 ATGGTAATATCTAGACTGTACG 325  
>miR6025e Score: 0.5 R03G\_15261  
Query: 1 TGCCATTATAGATCTGACATGC 22  
|||||:|||||||||||||||||

Sbjct: 622 ACGGTAGTATCTAGACTGTACG 601  
>miR6025e Score: 1.5 R03G\_14361  
Query: 1 TGCCATTATAGATCTGACATGC 22  
|||||:|||\*|||||||||||||

Sbjct: 622 ACGGTAGTATATAGACTGTACG 601  
>miR6025e Score: 0.5 R03G\_14555  
Query: 1 TGCCATTATAGATCTGACATGC 22  
|:|||||||||||||||||||||

Sbjct: 250 ATGGTAATATCTAGACTGTACG 229  
>miR6025e Score: 2.0 R03G\_14568  
Query: 1 TGCCATTATAGATCTGACATGC 22  
|||||:|||\*|:|||||||||

Sbjct: 622 ACGGTAGTATATGGACTGTACG 601  
>miR6025e Score: 0.5 R03G\_14770  
Query: 1 TGCCATTATAGATCTGACATGC 22  
|:|||||||||||||||||||||

Sbjct: 622 ATGGTAATATCTAGACTGTACG 601  
>miR6025e Score: 0.5 R03G\_14786  
Query: 1 TGCCATTATAGATCTGACATGC 22  
|:|||||||||||||||||||||

Sbjct: 250 ATGGTAATATCTAGACTGTACG 229  
>miR6025e Score: 0.0 R03G\_13714  
Query: 1 TGCCATTATAGATCTGACATGC 22  
|||||||||||||||||||||

Sbjct: 622 ACGGTAATATCTAGACTGTACG 601  
>miR6025e Score: 1.5 R03G\_13852  
Query: 1 TGCCATTATAGATCTGACATGC 22  
|:||||:|||||||||||||||\*

Sbjct: 373 ATGGTAGTATCTAGACTGTACA 352  
>miR6025e Score: 2.0 R03G\_12663  
Query: 1 TGCCATTATAGATCTGACATGC 22  
|||||:|||:\*|||||||||

Sbjct: 457 ACGGTAGTATTCAGACTGTACG 436  
>miR6025e Score: 1.5 R03G\_11962  
Query: 1 TGCCATTATAGATCTGACATGC 22  
|:|||||\*|||||||||||||

Sbjct: 346 ATGGTAATCTCTAGACTGTACG 325

>miR6025e Score: 2.0 R03G\_11966  
Query: 1 TGCCATTATAGATCTGACATGC 22  
|||||:||||\*|||||||\*||  
Sbjct: 622 ACGGTAGTATATAGACTGTCCG 601

>miR6025e Score: 0.5 R03G\_11235  
Query: 1 TGCCATTATAGATCTGACATGC 22  
|:|||||||  
Sbjct: 517 ATGGTAATATCTAGACTGTACG 496

>miR6025e Score: 1.5 R03G\_11264  
Query: 1 TGCCATTATAGATCTGACATGC 22  
|||||:||||\*|||||||  
Sbjct: 622 ACGGTAGTATATAGACTGTACG 601

>miR6025e Score: 0.5 R03G\_11781  
Query: 1 TGCCATTATAGATCTGACATGC 22  
|:|||||||  
Sbjct: 517 ATGGTAATATCTAGACTGTACG 496

>miR6025e Score: 2.0 R03G\_10729  
Query: 1 TGCCATTATAGATCTGACATGC 22  
|||||:||||\*|:|||||||  
Sbjct: 622 ACGGTAGTATATGGACTGTACG 601

>miR6025e Score: 1.5 R03G\_10771  
Query: 1 TGCCATTATAGATCTGACATGC 22  
|:||||:|||||||\*  
Sbjct: 373 ATGGTAGTATCTAGACTGTACA 352

>miR6025e Score: 2.0 R03G\_10773  
Query: 1 TGCCATTATAGATCTGACATGC 22  
|||||:||||\*|:|||||||  
Sbjct: 622 ACGGTAGTATGTGGACTGTACG 601

>miR6025e Score: 1.0 R03G\_10779  
Query: 1 TGCCATTATAGATCTGACATGC 22  
|:|||||||:|||||||  
Sbjct: 238 ATGGTAATATTTAGACTGTACG 217

>miR6025e Score: 2.0 R03G\_10780  
Query: 1 TGCCATTATAGATCTGACATGC 22  
|||||:||||\*|:|||||||  
Sbjct: 622 ACGGTAGTATGTGGACTGTACG 601

>miR6025e Score: 0.5 R03G\_10795  
Query: 1 TGCCATTATAGATCTGACATGC 22  
|:|||||||  
Sbjct: 622 ATGGTAATATCTAGACTGTACG 601

>miR6025e Score: 2.0 R03G\_10798  
Query: 1 TGCCATTATAGATCTGACATGC 22  
|||||:||||\*|:|||||||  
Sbjct: 622 ACGGTAGTATATGGACTGTACG 601

>miR6025e Score: 0.0 R03G\_09193

Query: 1 TGCCATTATAGATCTGACATGC 22  
|||||  
Sbjct: 346 ACGGTAATATCTAGACTGTACG 325  
>miR6025e Score: 2.0 R03G\_09194

Query: 1 TGCCATTATAGATCTGACATGC 22  
|||||:||||\*|||||\*||  
Sbjct: 622 ACGGTAGTATATAGACTGTCCG 601  
>miR6025e Score: 2.0 R03G\_09542

Query: 1 TGCCATTATAGATCTGACATGC 22  
|||||:||||\*|:|||||  
Sbjct: 622 ACGGTAGTATATGGACTGTACG 601  
>miR6025e Score: 1.5 R03G\_09945

Query: 1 TGCCATTATAGATCTGACATGC 22  
|||||:||||\*|||||  
Sbjct: 346 ACGGTAGTATATAGACTGTACG 325  
>miR6025e Score: 2.0 R03G\_09967

Query: 1 TGCCATTATAGATCTGACATGC 22  
|||||:||||\*|||||\*||  
Sbjct: 622 ACGGTAGTATATAGACTGTCCG 601  
>miR6025e Score: 2.5 R03G\_07984

Query: 1 TGCCATTATAGATCTGACATGC 22  
|:||||:||||\*|||||\*  
Sbjct: 622 ATGGTAGTATCCAGACTGTACA 601  
>miR6025e Score: 0.5 R03G\_06735

Query: 1 TGCCATTATAGATCTGACATGC 22  
|:|||||  
Sbjct: 346 ATGGTAATATCTAGACTGTACG 325  
>miR6025e Score: 1.5 R03G\_07124

Query: 1 TGCCATTATAGATCTGACATGC 22  
|||||:||||\*|||||  
Sbjct: 622 ACGGTAGTATGTAGACTGTACG 601  
>miR6025e Score: 0.5 R03G\_07137

Query: 1 TGCCATTATAGATCTGACATGC 22  
|||||:|||||  
Sbjct: 622 ACGGTAGTATCTAGACTGTACG 601  
>miR6025e Score: 0.5 R03G\_07702

Query: 1 TGCCATTATAGATCTGACATGC 22  
|:|||||  
Sbjct: 373 ATGGTAATATCTAGACTGTACG 352  
>miR6025e Score: 0.5 R03G\_07705

Query: 1 TGCCATTATAGATCTGACATGC 22  
|:|||||  
Sbjct: 622 ATGGTAATATCTAGACTGTACG 601  
>miR6025e Score: 1.0 R03G\_07739

Query: 1 TGCCATTATAGATCTGACATGC 22



|:||||:|||||||  
Sbjct: 373 ATGGTAGTATCTAGACTGTACG 352  
>miR6025e Score: 2.0 R03G\_07860  
Query: 1 TGCCATTATAGATCTGACATGC 22  
|||||:|||\*||||||\*||  
Sbjct: 622 ACGGTAGTATATAGACTGTCCG 601  
>miR6025e Score: 0.5 R03G\_07867  
Query: 1 TGCCATTATAGATCTGACATGC 22  
|||||:|||||||  
Sbjct: 373 ACGGTAGTATCTAGACTGTACG 352  
>miR6025e Score: 2.5 R03G\_07876  
Query: 1 TGCCATTATAGATCTGACATGC 22  
|:||||:|||\*|:|||||||  
Sbjct: 496 ATGGTAGTATATGGACTGTACG 475  
>miR6025e Score: 1.0 R03G\_05632  
Query: 1 TGCCATTATAGATCTGACATGC 22  
|\*|||||||  
Sbjct: 307 AGGGTAATATCTAGACTGTACG 286  
>miR6025e Score: 0.5 R03G\_05640  
Query: 1 TGCCATTATAGATCTGACATGC 22  
|||||:|||||||  
Sbjct: 517 ACGGTAGTATCTAGACTGTACG 496  
>miR6025e Score: 1.5 R03G\_05921  
Query: 1 TGCCATTATAGATCTGACATGC 22  
|||||:|||\*|||||||  
Sbjct: 622 ACGGTAGTATATAGACTGTACG 601  
>miR6025e Score: 1.5 R03G\_05939  
Query: 1 TGCCATTATAGATCTGACATGC 22  
|||||:|||\*|||||||  
Sbjct: 622 ACGGTAGTATGTAGACTGTACG 601  
>miR6025e Score: 2.5 R03G\_05953  
Query: 1 TGCCATTATAGATCTGACATGC 22  
|:||||:|||\*||||||\*||  
Sbjct: 622 ATGGTAGTATATAGACTGTCCG 601  
>miR6025e Score: 2.0 R03G\_05959  
Query: 1 TGCCATTATAGATCTGACATGC 22  
|||||:|||\*||||||\*||  
Sbjct: 622 ACGGTAGTATATAGACTGTCCG 601  
>miR6025e Score: 0.5 R03G\_06417  
Query: 1 TGCCATTATAGATCTGACATGC 22  
|:|||||||  
Sbjct: 250 ATGGTAATATCTAGACTGTACG 229  
>miR6025e Score: 1.0 R03G\_06433  
Query: 1 TGCCATTATAGATCTGACATGC 22  
|:|||||||:|||||||

Sbjct: 346 ATGGTAATATTTAGACTGTACG 325  
>miR6025e Score: 0.5 R03G\_06717  
Query: 1 TGCCATTATAGATCTGACATGC 22  
|||||:|||||

Sbjct: 622 ACGGTAGTATCTAGACTGTACG 601  
>miR6025e Score: 0.5 R03G\_04674  
Query: 1 TGCCATTATAGATCTGACATGC 22  
|||||:|||||

Sbjct: 373 ACGGTAGTATCTAGACTGTACG 352  
>miR6025e Score: 0.0 R03G\_04682  
Query: 1 TGCCATTATAGATCTGACATGC 22  
|||||:|||||

Sbjct: 622 ACGGTAATATCTAGACTGTACG 601  
>miR6025e Score: 0.5 R03G\_04695  
Query: 1 TGCCATTATAGATCTGACATGC 22  
|||||:|||||

Sbjct: 412 ACGGTAGTATCTAGACTGTACG 391  
>miR6025e Score: 2.0 R03G\_05267  
Query: 1 TGCCATTATAGATCTGACATGC 22  
|||||:|||\*|||||\*||

Sbjct: 622 ACGGTAGTATATAGACTGTCCG 601  
>miR6025e Score: 0.5 R03G\_05268  
Query: 1 TGCCATTATAGATCTGACATGC 22  
|||||:|||||

Sbjct: 622 ACGGTAGTATCTAGACTGTACG 601  
>miR6025e Score: 0.0 R03G\_02824  
Query: 1 TGCCATTATAGATCTGACATGC 22  
|||||:|||||

Sbjct: 622 ACGGTAATATCTAGACTGTACG 601  
>miR6025e Score: 1.5 R03G\_03591  
Query: 1 TGCCATTATAGATCTGACATGC 22  
|:|||||:|||:|||||

Sbjct: 238 ATGGTAATATTTAGGCTGTACG 217  
>miR6025e Score: 2.0 R03G\_04117  
Query: 1 TGCCATTATAGATCTGACATGC 22  
|:||||:||||\*|||||

Sbjct: 517 ATGGTAGTATCCAGACTGTACG 496  
>miR6025e Score: 1.5 R03G\_04207  
Query: 1 TGCCATTATAGATCTGACATGC 22  
|||||:|||\*|||||

Sbjct: 622 ACGGTAGTATATAGACTGTACG 601  
>miR6025e Score: 2.0 R03G\_04210  
Query: 1 TGCCATTATAGATCTGACATGC 22  
|||||:|||\*|:|||||

Sbjct: 622 ACGGTAGTATGTGGACTGTACG 601

>miR6025e Score: 2.5 R03G\_00238  
Query: 1 TGCCATTATAGATCTGACATGC 22  
|:||||:||||\*|||||||\*  
Sbjct: 622 ATGGTAGTATCCAGACTGTACA 601

>miR6025e Score: 2.0 R03G\_00256  
Query: 1 TGCCATTATAGATCTGACATGC 22  
|||||:|||\*|||||||\*||  
Sbjct: 622 ACGGTAGTATATAGACTGTCCG 601

>miR6025e Score: 2.5 R03G\_01205  
Query: 1 TGCCATTATAGATCTGACATGC 22  
|:||||:||||\*|||||||\*  
Sbjct: 622 ATGGTAGTATCCAGACTGTACA 601

>miR6025e Score: 0.5 R03G\_01328  
Query: 1 TGCCATTATAGATCTGACATGC 22  
|||||:|||||||  
Sbjct: 622 ACGGTAGTATCTAGACTGTACG 601

>miR6025e Score: 1.5 R03G\_01942  
Query: 1 TGCCATTATAGATCTGACATGC 22  
|||||:|||\*|||||||  
Sbjct: 619 ACGGTAGTATATAGACTGTACG 598

>miR6025e Score: 0.0 R03G\_01962  
Query: 1 TGCCATTATAGATCTGACATGC 22  
|||||||  
Sbjct: 373 ACGGTAATATCTAGACTGTACG 352

>miR6025e Score: 1.5 R03G\_17449  
Query: 1 TGCCATTATAGATCTGACATGC 22  
|||||:|||\*|||||||  
Sbjct: 622 ACGGTAGTATATAGACTGTACG 601

>miR6025e Score: 0.0 R03G\_17416  
Query: 1 TGCCATTATAGATCTGACATGC 22  
|||||||  
Sbjct: 622 ACGGTAATATCTAGACTGTACG 601

>miR6025e Score: 1.5 R03G\_17399  
Query: 1 TGCCATTATAGATCTGACATGC 22  
||\*|||:|||||||  
Sbjct: 622 ACAGTAGTATCTAGACTGTACG 601

>miR6025e Score: 0.5 R03G\_17387  
Query: 1 TGCCATTATAGATCTGACATGC 22  
|||||:|||||||  
Sbjct: 622 ACGGTAGTATCTAGACTGTACG 601

>miR6025e Score: 0.0 R03G\_17355  
Query: 1 TGCCATTATAGATCTGACATGC 22  
|||||||  
Sbjct: 457 ACGGTAATATCTAGACTGTACG 436

>miR6025e Score: 0.0 R03G\_17291

Query: 1 TGCCATTATAGATCTGACATGC 22  
|||||  
Sbjct: 622 ACGGTAATATCTAGACTGTACG 601  
>miR6025e Score: 1.0 R03G\_17277  
Query: 1 TGCCATTATAGATCTGACATGC 22  
|:|||||:|||||  
Sbjct: 106 ATGGTAATATTTAGACTGTACG 85  
>miR319f Score: 2.5 R03G\_14171  
Query: 1 TTGGATGAAAGGGGCATGCTT 21  
|:::|||||:|||||\*||  
Sbjct: 989 AGTTTACTTTCTCCGTACTAA 969  
>miR319f Score: 0.5 R03G\_04030  
Query: 1 TTGGATGAAAGGGGCATGCTT 21  
|||||:|||||  
Sbjct: 1126 AACCTACTTTTCCCGTACGAA 1106  
>miR9553-3p Score: 2.5 R03G\_16362  
Query: 1 TAATCATCCCAGCTATGAACAT 22  
||\*|||||:||||\*||\*|  
Sbjct: 3050 ATAAGTAGGGTTGATACCTGGA 3029  
>miR9553-3p Score: 0.0 R03G\_11541  
Query: 1 TAATCATCCCAGCTATGAACAT 22  
|||||:|||||  
Sbjct: 1076 ATTAGTAGGGTCGATACTTGTA 1055  
>miR9553-3p Score: 0.0 R03G\_09175  
Query: 1 TAATCATCCCAGCTATGAACAT 22  
|||||:|||||  
Sbjct: 3686 ATTAGTAGGGTCGATACTTGTA 3665  
>miR9553-3p Score: 0.0 R03G\_02695  
Query: 1 TAATCATCCCAGCTATGAACAT 22  
|||||:|||||  
Sbjct: 3686 ATTAGTAGGGTCGATACTTGTA 3665  
>miR9553-3p Score: 0.0 R03G\_03550  
Query: 1 TAATCATCCCAGCTATGAACAT 22  
|||||:|||||  
Sbjct: 3686 ATTAGTAGGGTCGATACTTGTA 3665  
>miR2868 Score: 2.5 R03G\_16417  
Query: 1 TTGATTTTGTGTTAGTAGCA 20  
|||||:|||||:|\*||\*|  
Sbjct: 747 AACTAAGACAACGTAATC-T 729  
>miR2868 Score: 2.5 R03G\_15310  
Query: 1 TTGATTTTGTGTTAGTAGCA 20  
|||||:|\*||:|||||\*|  
Sbjct: 670 AACTAGAAAAATATCATC-T 652  
>miR2868 Score: 2.5 R03G\_14147  
Query: 1 TTGATTTTGTGTTAGTAGCA 20

|||||||:|:|\*||\*||  
Sbjct: 1154 AACTAAAATAATAACAT-GT 1136  
>miR2868 Score: 0.0 R03G\_14217  
Query: 1 TTGATTTTGTGTAGTAGCA 20  
|||||||  
Sbjct: 618 AACTAAAACAACATCATCGT 599  
>miR2868 Score: 2.5 R03G\_13385  
Query: 1 TTGATTTTGTGTAGTAGCA 20  
|||||||\*||\*||\*||  
Sbjct: 111 AACTAAAACAACAACAAC-T 93  
>miR2868 Score: 0.0 R03G\_13590  
Query: 1 TTGATTTTGTGTAGTAGCA 20  
|||||||  
Sbjct: 618 AACTAAAACAACATCATCGT 599  
>miR2868 Score: 2.5 R03G\_12098  
Query: 1 TTGATTTTGTGTAGTAGCA 20  
\*||||:|||||||:|||\*\*  
Sbjct: 393 TACTAGAACAACATTATCAA 374  
>miR2868 Score: 2.5 R03G\_11324  
Query: 1 TTGATTTTGTGTAGTAGCA 20  
\*||\*|||||||:|  
Sbjct: 151 CACCAAAAACAACATTGTCGT 132  
>miR2868 Score: 0.2 R03G\_11515  
Query: 1 TTGATTTTGTGTAGTAGCA 20  
:|||||||  
Sbjct: 351 GACTAAAACAACATCATCGT 332  
>miR2868 Score: 2.5 R03G\_11675  
Query: 1 TTGATTTTGTGTAGTAGCA 20  
||\*||:|:|:|:|  
Sbjct: 598 AACGAAGACGACATCGTCGT 579  
>miR2868 Score: 2.2 R03G\_10461  
Query: 1 TTGATTTTGTGTAGTAGCA 20  
|\*\*|||||||:|  
Sbjct: 79 ATATAAAAACAACATCATTGT 60  
>miR2868 Score: 2.0 R03G\_10856  
Query: 1 TTGATTTTGTGTAGTAGCA 20  
||\*|||||:||||:|  
Sbjct: 660 AAGTAAAACGACATTATCGT 641  
>miR2868 Score: 2.0 R03G\_09230  
Query: 1 TTGATTTTGTGTAGTAGCA 20  
\*||\*|||||||\*||  
Sbjct: 214 CACGAAAACAACATCATCAT 195  
>miR2868 Score: 2.5 R03G\_08621  
Query: 1 TTGATTTTGTGTAGTAGCA 20  
||\*||\*|||||||\*||

Sbjct: 760 AACGACAACAACATCATCTT 741  
>miR2868 Score: 2.5 R03G\_08992  
Query: 1 TTGATTTTGTGTTGTAGTAGCA 20  
|||\*|||||||:|\*|||  
Sbjct: 686 AACAAAAACAACATTA-CGT 668  
>miR2868 Score: 2.0 R03G\_07279  
Query: 1 TTGATTTTGTGTTGTAGTAGCA 20  
|||\*||:||||:|||||||  
Sbjct: 3169 AACAAAGACAATATCATCGT 3150  
>miR2868 Score: 2.5 R03G\_07846  
Query: 1 TTGATTTTGTGTTGTAGTAGCA 20  
|||||||:|\*\*|\*  
Sbjct: 857 AACTAAAACAACATTA-GGA 839  
>miR2868 Score: 2.2 R03G\_06097  
Query: 1 TTGATTTTGTGTTGTAGTAGCA 20  
::||||:|\*|||||||  
Sbjct: 388 GGCTAAGAGAACATCATCGT 369  
>miR2868 Score: 2.5 R03G\_06532  
Query: 1 TTGATTTTGTGTTGTAGTAGCA 20  
\*|||||||:|||||\*||\*  
Sbjct: 669 TACTAAAACGACATCAACGA 650  
>miR2868 Score: 2.2 R03G\_04479  
Query: 1 TTGATTTTGTGTTGTAGTAGCA 20  
|||||:||\*||||:||:|  
Sbjct: 549 AACTAAGACCACATTATTGT 530  
>miR2868 Score: 2.5 R03G\_02514  
Query: 1 TTGATTTTGTGTTGTAGTAGCA 20  
|||||||\*|||:||||\*||\*  
Sbjct: 561 AACTAAAAGAACGTCATAGA 542  
>miR2868 Score: 2.5 R03G\_03026  
Query: 1 TTGATTTTGTGTTGTAGTAGCA 20  
|||||||\*|||:|||\*||\*  
Sbjct: 37 AACTAAAACAACATATTC-T 19  
>miR2868 Score: 2.0 R03G\_03130  
Query: 1 TTGATTTTGTGTTGTAGTAGCA 20  
|||||||:|||||\*|||  
Sbjct: 928 AACTAAAGTAACATCTTCGT 909  
>miR2868 Score: 2.5 R03G\_03352  
Query: 1 TTGATTTTGTGTTGTAGTAGCA 20  
|||\*||\*|||||||\*||\*  
Sbjct: 667 AACACAACAACATCATCTT 648  
>miR2868 Score: 0.5 R03G\_03617  
Query: 1 TTGATTTTGTGTTGTAGTAGCA 20  
|||||||:||||  
Sbjct: 1587 AACTAAAACAACATCGTCGT 1568

>miR2868 Score: 2.2 R03G\_03720  
Query: 1 TTGATTTTGTGTTGTAGTAGCA 20  
|||\*|||:|  
Sbjct: 352 AACGACAACAACATCATTGT 333

>miR2868 Score: 2.5 R03G\_03818  
Query: 1 TTGATTTTGTGTTGTAGTAGCA 20  
|||\*|||:|  
Sbjct: 1756 AACGACAACAACATCGTCGT 1737

>miR2868 Score: 2.5 R03G\_03950  
Query: 1 TTGATTTTGTGTTGTAGTAGCA 20  
|||\*|||\*|  
Sbjct: 373 AACGACAACAACATCATCAT 354

>miR2868 Score: 0.5 R03G\_04048  
Query: 1 TTGATTTTGTGTTGTAGTAGCA 20  
|||:|  
Sbjct: 1527 AACTAAAACAACATCGTCGT 1508

>miR2868 Score: 2.0 R03G\_04201  
Query: 1 TTGATTTTGTGTTGTAGTAGCA 20  
::|||:|\*|  
Sbjct: 792 GGCTAAAACAACATTATT-T 774

>miR2868 Score: 2.5 R03G\_04209  
Query: 1 TTGATTTTGTGTTGTAGTAGCA 20  
|||\*||:|\*|  
Sbjct: 85 AACTAAAAAATATTATAGT 66

>miR2868 Score: 2.2 R03G\_00028  
Query: 1 TTGATTTTGTGTTGTAGTAG-CA 20  
|\*|||:|\*|  
Sbjct: 791 ACCTAAAACAACATCGTTCGT 771

>miR2868 Score: 2.5 R03G\_00451  
Query: 1 TTGATTTTGTGTTGTAGTAGCA 20  
|||:|\*|||\*  
Sbjct: 298 AACTAGAATAACAACATCGA 279

>miR2868 Score: 2.0 R03G\_00460  
Query: 1 TTGATTTTGTGTTGTAGTAGCA 20  
|||:|||\*|||\*|  
Sbjct: 310 AACTGAAACAAAATCATCCT 291

>miR2868 Score: 2.5 R03G\_00896  
Query: 1 TTGATTTTGTGTTGTAGTAGCA 20  
|||:|\*||\*|  
Sbjct: 378 AACTAAAACAACGTAATAGA 359

>miR2868 Score: 2.0 R03G\_01611  
Query: 1 TTGATTTTGTGTTGTAGTAGCA 20  
::|||:|\*|  
Sbjct: 2832 GGCTAAAACAACATTATT-T 2814

>miR2868 Score: 2.5 R03G\_01651





```
|||||
Sbjct: 4355 AACCCAACCTCGAAAGAAAAAAG 4333
>miR8011a-5p Score: 0.0 R03G_06442
Query: 1 TTGGGTTGAGCTTTCTTTTTTTC 23
|||||
Sbjct: 5918 AACCCAACCTCGAAAGAAAAAAG 5896
>miR8011a-5p Score: 0.0 R03G_02691
Query: 1 TTGGGTTGAGCTTTCTTTTTTTC 23
|||||
Sbjct: 8750 AACCCAACCTCGAAAGAAAAAAG 8728
>miR8011a-5p Score: 0.0 R03G_02959
Query: 1 TTGGGTTGAGCTTTCTTTTTTTC 23
|||||
Sbjct: 5101 AACCCAACCTCGAAAGAAAAAAG 5079
>miR8011a-5p Score: 0.0 R03G_03547
Query: 1 TTGGGTTGAGCTTTCTTTTTTTC 23
|||||
Sbjct: 5261 AACCCAACCTCGAAAGAAAAAAG 5239
>miR8011a-5p Score: 1.0 R03G_04115
Query: 1 TTGGGTTGAGCTTTCTTTTTTTC 23
||||:|||||*
Sbjct: 2053 AACCTAACCTCGAAAGAAAAAAG 2031
>miR8011a-5p Score: 0.5 R03G_17404
Query: 1 TTGGGTTGAGCTTTCTTTTTTTC 23
|||||*
Sbjct: 1738 AACCCAACCTCGAAAGAAAAAAG 1716
>miR1152 Score: 0.0 R03G_13297
Query: 1 TAAAAGGAGCGCGTCTTGAA 20
|||||
Sbjct: 738 ATTTTCCTCGCGCAGAACTT 719
>miR1152 Score: 0.0 R03G_10676
Query: 1 TAAAAGGAGCGCGTCTTGAA 20
|||||
Sbjct: 4119 ATTTTCCTCGCGCAGAACTT 4100
>miR1152 Score: 0.0 R03G_09480
Query: 1 TAAAAGGAGCGCGTCTTGAA 20
|||||
Sbjct: 4977 ATTTTCCTCGCGCAGAACTT 4958
>miR854 Score: 2.5 R03G_14229
Query: 1 TGATGAGGATATTGAGAAGGG 21
*||*|||||:|||||:
Sbjct: 2660 CCTCCTCCTATAGCTCTTCTT 2640
>miR854 Score: 2.5 R03G_13317
Query: 1 TGATGAGGATATTGAGAAGGG 21
*|||||:|||||*||*
```

Sbjct: 486 CCTACTTCTATAACTCCTCCA 466  
>miR854 Score: 1.5 R03G\_11879  
Query: 1 TGATGAGGATATTGAGAAGGG 21  
||||:|||||||:||||\*|  
Sbjct: 2158 ACTATTCCTATAATTCTTCAC 2138  
>miR854 Score: 2.0 R03G\_03642  
Query: 1 TGATGAGGATATTGAGAAGGG 21  
::||:||:|||||||:|  
Sbjct: 1195 GTTATTCTTATAACTCTTCTC 1175  
>miR824-3p Score: 2.2 R03G\_12044  
Query: 1 CCTTCTCATCGATGGTCTAG 20  
\*\*|||||||:|||||:|  
Sbjct: 220 ATAAGAGTAGTTACCAGGTC 201  
>miR1435a Score: 0.8 R03G\_17245  
Query: 1 TTTCTTAAAGTGCAAGTTTTTC 22  
|||||||:||:|  
Sbjct: 221 AAAGAATTTACGTTTAAGAAG 200  
>miR1435a Score: 0.8 R03G\_16910  
Query: 1 TTTCTTAAAGTGCAAGTTTTTC 22  
|||||||:||:|  
Sbjct: 221 AAAGAATTTACGTTTAAGAAG 200  
>miR1435a Score: 0.8 R03G\_14707  
Query: 1 TTTCTTAAAGTGCAAGTTTTTC 22  
|||||||:||:|  
Sbjct: 221 AAAGAATTTACGTTTAAGAAG 200  
>miR1435a Score: 0.0 R03G\_13710  
Query: 1 TTTCTTAAAGTGCAAGTTTTTC 22  
|||||||:||||  
Sbjct: 221 AAAGAATTTACGTTCAAAAAG 200  
>miR1435a Score: 0.8 R03G\_13738  
Query: 1 TTTCTTAAAGTGCAAGTTTTTC 22  
|||||||:||:|  
Sbjct: 221 AAAGAATTTACGTTTAAGAAG 200  
>miR1435a Score: 0.8 R03G\_12006  
Query: 1 TTTCTTAAAGTGCAAGTTTTTC 22  
|||||||:||:|  
Sbjct: 221 AAAGAATTTACGTTTAAGAAG 200  
>miR1435a Score: 0.0 R03G\_11285  
Query: 1 TTTCTTAAAGTGCAAGTTTTTC 22  
|||||||:||||  
Sbjct: 221 AAAGAATTTACGTTCAAAAAG 200  
>miR1435a Score: 2.5 R03G\_11681  
Query: 1 TTTCTTAAAGTGCAAGTTTTTC 22  
\*|||\*|||||||\*|||  
Sbjct: 1201 CAAGTATTTACGTTCACTAAG 1180



Query: 1 TTGGATTGAAGGGAGCTCT 19  
\*|:|||||||:||||\*|||  
Sbjct: 1211 CATCTAACTTCTCTCCAGA 1193  
>miR9722 Score: 2.5 R03G\_08462  
Query: 1 TAAAGATGGGAAGATGAAGAA 21  
\*|||||||:|||||:||||\*\*  
Sbjct: 437 CTTTCTACTCTTCTGCTTCGA 417  
>miR394a Score: 2.5 R03G\_08277  
Query: 1 TTGGCATTCTGTCCACCTC 19  
|||||||:\*||||||\*|||  
Sbjct: 2351 AACCGTAGCACAGGTCGAG 2333  
>miR1169-3p Score: 2.5 R03G\_14434  
Query: 1 TGTGGATGTTGCTTTCTGTGACC 23  
||||||\*|:|||||||\*|||\*|  
Sbjct: 1375 ACACCTTTAACGAAAGA-ACTTG 1354  
>miR1169-3p Score: 1.0 R03G\_13809  
Query: 1 TGTGGATGTTGCTTTCTGTGACC 23  
||||\*|||||||  
Sbjct: 81 ACACATACAACGAAAGACACTGG 59  
>miR1169-3p Score: 0.5 R03G\_13001  
Query: 1 TGTGGATGTTGCTTTCTGTGACC 23  
|||||||:|||||||  
Sbjct: 1603 ACACCTACAATGAAAGACACTGG 1581  
>miR1169-3p Score: 0.0 R03G\_11964  
Query: 1 TGTGGATGTTGCTTTCTGTGACC 23  
|||||||  
Sbjct: 47 ACACCTACAACGAAAGACACTGG 25  
>miR1169-3p Score: 2.5 R03G\_08182  
Query: 1 TGTGGATGTTGCTTTCTGTGACC 23  
|||:|:|:|||||||\*|||\*|  
Sbjct: 237 ACATCTGCGACGAAAGA-ACTAG 216  
>miR1169-3p Score: 2.0 R03G\_08215  
Query: 1 TGTGGATGTTGCTTTCTGTGACC 23  
|||:|:|:|||||||\*|||  
Sbjct: 252 ACATCTGCGACGAAAGA-ACTGG 231  
>miR1169-3p Score: 2.5 R03G\_08368  
Query: 1 TGTGGATGTTGCTTTCTGTGACC 23  
|||:|:|:|||||||\*||\*|  
Sbjct: 109 ACATCTGCGACGAAAGA-ACCGG 88  
>miR1169-3p Score: 0.5 R03G\_06596  
Query: 1 TGTGGATGTTGCTTTCTGTGACC 23  
|||||||:|||||||  
Sbjct: 1603 ACACCTACAATGAAAGACACTGG 1581  
>miR1169-3p Score: 0.5 R03G\_03002  
Query: 1 TGTGGATGTTGCTTTCTGTGACC 23

|||||||:|||||||  
Sbjct: 1603 ACACCTACAATGAAAGACACTGG 1581  
>miR1169-3p Score: 1.0 R03G\_02146  
Query: 1 TGTGGATGTTGCTTTCTGTGACC 23  
|||||||:|||||||\*  
Sbjct: 24 ACACCTACAATGAAAGACACTGT 2  
>miR157a-5p Score: 2.5 R03G\_08552  
Query: 1 TTGACAGAAGATAGAGAGCA 20  
\*||||:|\*|:|||||  
Sbjct: 1183 CACTGTTTTGTGTCTCTCGT 1164  
>miR157a-5p Score: 2.5 R03G\_07943  
Query: 1 TTGACAGAAGATAGAGAGCA 20  
\*|||||||\*|:|||\*|  
Sbjct: 434 CACTGTCTTCTACTTCTCCT 415  
>miR157a-5p Score: 2.5 R03G\_05159  
Query: 1 TTGACAGAAGATAGAGAGCA 20  
:|:|\*|||||||:|||:|  
Sbjct: 98 GATTATCTTCTATTTCTTGT 79  
>miR157a-5p Score: 2.5 R03G\_03092  
Query: 1 TTGACAGAAGATAGAGAGCA 20  
\*||||:|\*|:|||||  
Sbjct: 1183 CACTGTTTTGTGTCTCTCGT 1164  
>miR157a-5p Score: 2.0 R03G\_03674  
Query: 1 TTGACAGAAGATAGAGAGCA 20  
|||||\*||||:||||\*||  
Sbjct: 375 AACTGTGTTCTGTCTCTAGT 356  
>miR1850.1 Score: 2.0 R03G\_14387  
Query: 1 TTGAAAGTTTGGGAGTTGGGA 21  
|||||||:||||\*|||:|  
Sbjct: 1248 AACTTTCAGACCCTAAACTTT 1228  
>miR1850.1 Score: 0.5 R03G\_13985  
Query: 1 TTGAAAGTTTGGGAGTTGGGA 21  
\*|||||||  
Sbjct: 35 TACTTTCAAACCCTCAACCCT 15  
>miR1850.1 Score: 1.0 R03G\_10032  
Query: 1 TTGAAAGTTTGGGAGTTGGGA 21  
|\*|||||||  
Sbjct: 29 ACCTTTCAAACCCTCAACCCT 9  
>miR1850.1 Score: 2.5 R03G\_06362  
Query: 1 TTGAAAGTTTGGGAGTTG-GGA 21  
|:|||||:|||:|\*|||  
Sbjct: 2173 AGCTTTCAGACCTTCGACACCT 2152  
>miR835-3p Score: 2.5 R03G\_17089  
Query: 1 TGAAGAGATACGCCAGGAG 19  
||\*|||||\*||||:|||

Sbjct: 395 ACATCTCTAGGCGGTTCTC 377  
>miR835-3p Score: 0.0 R03G\_14509  
Query: 1 TGAAGAGATACGCCAGGAG 19  
|||||

Sbjct: 856 ACTTCTCTATGCGGTCCTC 838  
>miR835-3p Score: 2.5 R03G\_05548  
Query: 1 TGAAGAGATACGCCAGGAG 19  
\*|||||\*||

Sbjct: 972 CCTTCTCTATGCTGTC-TC 955  
>miR835-3p Score: 2.5 R03G\_06167  
Query: 1 TGAAGAGATACGCCAGGAG 19  
|:|\*|||||\*||||

Sbjct: 338 ATTA CTCTATGCAGTCCTC 320  
>miR1428e-3p Score: 0.0 R03G\_13882  
Query: 1 TAAGAAATGCCATGAACTCTTT 22  
|||||

Sbjct: 652 ATTCTTTACGGTACTTGAGAAA 631  
>miR1428e-3p Score: 0.0 R03G\_13730  
Query: 1 TAAGAAATGCCATGAACTCTTT 22  
|||||

Sbjct: 415 ATTCTTTACGGTACTTGAGAAA 394  
>miR1428e-3p Score: 0.0 R03G\_05325  
Query: 1 TAAGAAATGCCATGAACTCTTT 22  
|||||

Sbjct: 652 ATTCTTTACGGTACTTGAGAAA 631  
>miR1428e-3p Score: 1.0 R03G\_03721  
Query: 1 TAAGAAATGCCATGAACTCTTT 22  
|||||

Sbjct: 652 ATTCTTTACGGTACTTAAGAAA 631  
>miR1428e-3p Score: 1.5 R03G\_00141  
Query: 1 TAAGAAATGCCATGAACTCTTT 22  
|||||:|||||\*||||

Sbjct: 652 ATTCTTTATGGTACTTAAGAAA 631  
>miR1428e-3p Score: 0.0 R03G\_00809  
Query: 1 TAAGAAATGCCATGAACTCTTT 22  
|||||

Sbjct: 652 ATTCTTTACGGTACTTGAGAAA 631  
>miR1428e-3p Score: 2.5 R03G\_02044  
Query: 1 TAAGAAATGCCATGAACTCTTT 22  
:||:|\*|||||:|||||:

Sbjct: 1542 GTTTTTGACGGTATTTGAGAAG 1521  
>miR7536a Score: 2.5 R03G\_07618  
Query: 1 TGAAGCATGCTCGAGACTG 19  
||||:|||\*|||||\*|

Sbjct: 417 ACTTTGTATCAGCTCTG-C 400

>miR7536a Score: 2.0 R03G\_01272  
Query: 1 TGAAGCATGCTCGAGACTG 19  
:|||||:|\*|||:|  
Sbjct: 3269 GCTTCGTATGAGGTCTGGC 3251

>miR393a Score: 2.5 R03G\_04001  
Query: 1 TCCAAAGGGATCGCATTGATC 21  
|\*||||\*|||||||\*|  
Sbjct: 2603 AAGTTTCACTAGCGTAACT-G 2584

>miR773a Score: 1.5 R03G\_16853  
Query: 1 TTTGCTGCCACTTTTGTACG 21  
|||||||\*||\*  
Sbjct: 670 AAACGACGGTGAAAAC-GTGG 651

>miR773a Score: 1.5 R03G\_16855  
Query: 1 TTTGCTGCCACTTTTGTACG 21  
|||||||\*||\*  
Sbjct: 670 AAACGACGGTGAAAAC-GTGG 651

>miR773a Score: 1.5 R03G\_16780  
Query: 1 TTTGCTGCCACTTTTGTACG 21  
|||||||\*||\*  
Sbjct: 670 AAACGACGGTGAAAAC-GTGG 651

>miR773a Score: 1.5 R03G\_16782  
Query: 1 TTTGCTGCCACTTTTGTACG 21  
|||||||\*||\*  
Sbjct: 670 AAACGACGGTGAAAAC-GTGG 651

>miR773a Score: 1.5 R03G\_16361  
Query: 1 TTTGCTGCCACTTTTGTACG 21  
||||:|\*|||||||  
Sbjct: 920 AAACGGCGTTGAAAACAGTGC 900

>miR773a Score: 1.5 R03G\_15904  
Query: 1 TTTGCTGCCACTTTTGTACG 21  
|||||||\*||\*  
Sbjct: 604 AAACGACGGTGAAAAC-GTGG 585

>miR773a Score: 2.0 R03G\_15475  
Query: 1 TTTGCTGCCACTTTTGTACG 21  
|||||||\*\*||\*  
Sbjct: 487 AAACGACGGTGAAAAC-CTGG 468

>miR773a Score: 2.0 R03G\_12985  
Query: 1 TTTGCTGCCACTTTTGTACG 21  
|||||||\*\*||\*  
Sbjct: 667 AAACGACGGTGAAAAC-CTGG 648

>miR773a Score: 2.0 R03G\_12986  
Query: 1 TTTGCTGCCACTTTTGTACG 21  
|||||||\*\*||\*  
Sbjct: 667 AAACGACGGTGAAAAC-CTGG 648

>miR773a Score: 2.0 R03G\_12228

Query: 1 TTTGCTGCCACTTTTGTACG 21  
|||||||\*||\*  
Sbjct: 667 AAACGACGGTGAAAAC-CTGG 648  
>miR773a Score: 2.0 R03G\_12229

Query: 1 TTTGCTGCCACTTTTGTACG 21  
|||||||\*||\*  
Sbjct: 667 AAACGACGGTGAAAAC-CTGG 648  
>miR773a Score: 2.5 R03G\_08059

Query: 1 TTTGCTGCCACTTTTGTACG 21  
\*||||||\*||||\*||\*  
Sbjct: 427 TAACGACGGTAAAAACTTC 407  
>miR773a Score: 2.0 R03G\_06812

Query: 1 TTTGCTGCCACTTTTGTACG 21  
|||||||\*||\*  
Sbjct: 667 AAACGACGGTGAAAAC-CTGG 648  
>miR773a Score: 2.0 R03G\_06815

Query: 1 TTTGCTGCCACTTTTGTACG 21  
|||||||\*||\*  
Sbjct: 601 AAACGACGGTGAAAAC-CTGG 582  
>miR773a Score: 2.0 R03G\_07241

Query: 1 TTTGCTGCCACTTTTGTACG 21  
|||||||\*||\*  
Sbjct: 601 AAACGACGGTGAAAAC-CTGG 582  
>miR773a Score: 2.0 R03G\_07244

Query: 1 TTTGCTGCCACTTTTGTACG 21  
|||||||\*||\*  
Sbjct: 694 AAACGACGGTGAAAAC-CTGG 675  
>miR773a Score: 2.5 R03G\_04955

Query: 1 TTTGCTGCCACTTTTGTCA-CG 21  
|||\*|||||:||\*||\*||  
Sbjct: 180 AAACCACGGTGAAGACACTAGC 159  
>miR773a Score: 2.5 R03G\_03107

Query: 1 TTTGCTGCCACTTTTGTACG 21  
\*||||||\*||||\*||\*  
Sbjct: 2734 TAACGACGGTAAAAACTTC 2714  
>miR773a Score: 0.0 R03G\_04126

Query: 1 TTTGCTGCCACTTTTGTACG 21  
|||||||  
Sbjct: 920 AAACGACGGTGAAAACAGTGC 900  
>miR773a Score: 2.0 R03G\_00573

Query: 1 TTTGCTGCCACTTTTGTACG 21  
|||||||\*||\*  
Sbjct: 439 AAACGACGGTGAAAAC-TTGG 420  
>miR773a Score: 1.5 R03G\_17422

Query: 1 TTTGCTGCCACTTTTGTACG 21



|||||:|\*|||||||  
Sbjct: 221 AAACGGCGTTGAAAACAGTGC 201  
>miR6030 Score: 2.5 R03G\_02123  
Query: 1 TCCACCCATACCATACAGACC 21  
\*|||||||:|\*|||  
Sbjct: 1728 TGGTGGGTATGGTGGGTATGG 1708  
>miR9552b-3p Score: 2.5 R03G\_10258  
Query: 1 TGGCGAGAGACCGATAGC 18  
\*|||||:|:|:|:|  
Sbjct: 1399 CCCGCTTTTTGGTTGTCG 1382  
>miR9552b-3p Score: 2.5 R03G\_09074  
Query: 1 TGGCGAGAGACCGATAGC 18  
||||:||||||:|:|\*|  
Sbjct: 1074 ACCGTTCTCTGGTTGTGG 1057  
>miR9552b-3p Score: 2.5 R03G\_09077  
Query: 1 TGGCGAGAGACCGATAGC 18  
||||:||||||:|:|\*|  
Sbjct: 1074 ACCGTTCTCTGGTTGTGG 1057  
>miR9552b-3p Score: 2.5 R03G\_07084  
Query: 1 TGGCGAGAGACCGATAGC 18  
\*:||:|||||||\*|||  
Sbjct: 165 TTCGTTCTCTGGCCATCG 148  
>miR9552b-3p Score: 2.5 R03G\_02584  
Query: 1 TGGCGAGAGACCGATAGC 18  
\*:||:|||||||\*|||  
Sbjct: 165 CTCGTTCTCTGGCCATCG 148  
>miR9552b-3p Score: 2.0 R03G\_03948  
Query: 1 TGGCGAGAGACCGATAGC 18  
|:~\*|||||||  
Sbjct: 84 ATTACTCTCTGGCTATCG 67  
>miR9552b-3p Score: 2.0 R03G\_01749  
Query: 1 TGGCGAGAGACCGATAGC 18  
\*:|||||||\*|||  
Sbjct: 204 CTCGCTCTCTGGCTACCG 187  
>miR8141 Score: 1.0 R03G\_16729  
Query: 1 TGCATACTAGTTGGTGGTGT 20  
|||||||\*|||||||  
Sbjct: 758 ACGTATGATGAACCACCACA 739  
>miR8141 Score: 0.2 R03G\_14560  
Query: 1 TGCATACTAGTTGGTGGTGT 20  
|||||||:|  
Sbjct: 758 ACGTATGATCAACCACCACG 739  
>miR8141 Score: 0.2 R03G\_13858  
Query: 1 TGCATACTAGTTGGTGGTGT 20  
|||||||:|



>miR902a-5p Score: 1.0 R03G\_15157  
Query: 1 TACTGCATGCACGCTTCTTCA 21  
\*|||||||:|||||||  
Sbjct: 347 TTGACGTATGTGCGAAGAAGT 327

>miR902a-5p Score: 1.0 R03G\_14637  
Query: 1 TACTGCATGCACGCTTCTTCA 21  
\*|||||||:|||||||  
Sbjct: 347 TTGACGTATGTGCGAAGAAGT 327

>miR902a-5p Score: 0.5 R03G\_13735  
Query: 1 TACTGCATGCACGCTTCTTCA 21  
|||||||:|||||||  
Sbjct: 347 ATGACGTATGTGCGAAGAAGT 327

>miR902a-5p Score: 0.2 R03G\_12957  
Query: 1 TACTGCATGCACGCTTCTTCA 21  
:|||||||:|||||||  
Sbjct: 347 GTGACGTACGTGCGAAGAAGT 327

>miR902a-5p Score: 1.0 R03G\_12005  
Query: 1 TACTGCATGCACGCTTCTTCA 21  
\*|||||||:|||||||  
Sbjct: 347 TTGACGTATGTGCGAAGAAGT 327

>miR902a-5p Score: 0.5 R03G\_12179  
Query: 1 TACTGCATGCACGCTTCTTCA 21  
|||||||:|||||||  
Sbjct: 347 ATGACGTATGTGCGAAGAAGT 327

>miR902a-5p Score: 0.5 R03G\_11953  
Query: 1 TACTGCATGCACGCTTCTTCA 21  
\*|||||||:|||||||  
Sbjct: 224 TTGACGTACGTGCGAAGAAGT 204

>miR902a-5p Score: 0.5 R03G\_10525  
Query: 1 TACTGCATGCACGCTTCTTCA 21  
\*|||||||:|||||||  
Sbjct: 347 TTGACGTACGTGCGAAGAAGT 327

>miR902a-5p Score: 0.5 R03G\_10531  
Query: 1 TACTGCATGCACGCTTCTTCA 21  
\*|||||||:|||||||  
Sbjct: 347 TTGACGTACGTGCGAAGAAGT 327

>miR902a-5p Score: 0.5 R03G\_10545  
Query: 1 TACTGCATGCACGCTTCTTCA 21  
\*|||||||:|||||||  
Sbjct: 347 TTGACGTACGTGCGAAGAAGT 327

>miR902a-5p Score: 0.5 R03G\_07110  
Query: 1 TACTGCATGCACGCTTCTTCA 21  
\*|||||||:|||||||  
Sbjct: 347 TTGACGTACGTGCGAAGAAGT 327

>miR902a-5p Score: 0.5 R03G\_07676

Query: 1 TACTGCATGCACGCTTCTTCA 21  
\*|||||  
Sbjct: 347 TTGACGTACGTGCGAAGAAGT 327  
>miR902a-5p Score: 0.5 R03G\_07678  
Query: 1 TACTGCATGCACGCTTCTTCA 21  
\*|||||  
Sbjct: 347 TTGACGTACGTGCGAAGAAGT 327  
>miR902a-5p Score: 0.5 R03G\_07868  
Query: 1 TACTGCATGCACGCTTCTTCA 21  
\*|||||  
Sbjct: 347 TTGACGTACGTGCGAAGAAGT 327  
>miR902a-5p Score: 0.5 R03G\_05523  
Query: 1 TACTGCATGCACGCTTCTTCA 21  
\*|||||  
Sbjct: 347 TTGACGTACGTGCGAAGAAGT 327  
>miR902a-5p Score: 1.0 R03G\_04676  
Query: 1 TACTGCATGCACGCTTCTTCA 21  
\*|||||:|||||  
Sbjct: 347 TTGACGTATGTGCGAAGAAGT 327  
>miR902a-5p Score: 0.5 R03G\_03767  
Query: 1 TACTGCATGCACGCTTCTTCA 21  
\*|||||  
Sbjct: 347 TTGACGTACGTGCGAAGAAGT 327  
>miR902a-5p Score: 0.5 R03G\_01949  
Query: 1 TACTGCATGCACGCTTCTTCA 21  
\*|||||  
Sbjct: 347 TTGACGTACGTGCGAAGAAGT 327  
>miR902a-5p Score: 0.5 R03G\_01968  
Query: 1 TACTGCATGCACGCTTCTTCA 21  
\*|||||  
Sbjct: 347 TTGACGTACGTGCGAAGAAGT 327  
>miR902a-5p Score: 0.5 R03G\_17380  
Query: 1 TACTGCATGCACGCTTCTTCA 21  
\*|||||  
Sbjct: 347 TTGACGTACGTGCGAAGAAGT 327  
>miR774b-5p Score: 0.2 R03G\_16736  
Query: 1 TGAAGATGCATATTTGGAGTGAC 23  
|||||:||  
Sbjct: 26 ACTTCTACGTATAAACCTCATTG 4  
>miR774b-5p Score: 0.0 R03G\_16138  
Query: 1 TGAAGATGCATATTTGGAGTGAC 23  
|||||  
Sbjct: 1892 ACTTCTACGTATAAACCTCACTG 1870  
>miR774b-5p Score: 0.5 R03G\_15580  
Query: 1 TGAAGATGCATATTTGGAGTGA-C 23

```
|||||*|
Sbjct: 1856 ACTTCTACGTATAAACCTCACTAG 1833
>miR774b-5p Score: 0.0 R03G_14626
Query: 1 TGAAGATGCATATTTGGAGTGAC 23
|||||
Sbjct: 1892 ACTTCTACGTATAAACCTCACTG 1870
>miR774b-5p Score: 0.2 R03G_14710
Query: 1 TGAAGATGCATATTTGGAGTGAC 23
|||||:|
Sbjct: 1892 ACTTCTACGTATAAACCTCATTG 1870
>miR774b-5p Score: 0.2 R03G_13747
Query: 1 TGAAGATGCATATTTGGAGTGAC 23
|||||:|
Sbjct: 1892 ACTTCTACGTATAAACCTCATTG 1870
>miR774b-5p Score: 0.0 R03G_13149
Query: 1 TGAAGATGCATATTTGGAGTGAC 23
|||||
Sbjct: 89 ACTTCTACGTATAAACCTCACTG 67
>miR774b-5p Score: 0.2 R03G_12009
Query: 1 TGAAGATGCATATTTGGAGTGAC 23
|||||:|
Sbjct: 1892 ACTTCTACGTATAAACCTCATTG 1870
>miR774b-5p Score: 0.0 R03G_12072
Query: 1 TGAAGATGCATATTTGGAGTGAC 23
|||||
Sbjct: 1892 ACTTCTACGTATAAACCTCACTG 1870
>miR774b-5p Score: 0.2 R03G_12169
Query: 1 TGAAGATGCATATTTGGAGTGAC 23
|||||:|
Sbjct: 1892 ACTTCTACGTATAAACCTCATTG 1870
>miR774b-5p Score: 0.2 R03G_11404
Query: 1 TGAAGATGCATATTTGGAGTGAC 23
|||||:|
Sbjct: 1892 ACTTCTACGTATAAACCTCATTG 1870
>miR774b-5p Score: 0.5 R03G_11531
Query: 1 TGAAGATGCATATTTGGAGTGA-C 23
|||||*|
Sbjct: 1385 ACTTCTACGTATAAACCTCACTAG 1362
>miR774b-5p Score: 0.2 R03G_11771
Query: 1 TGAAGATGCATATTTGGAGTGAC 23
|||||:|
Sbjct: 1892 ACTTCTACGTATAAACCTCATTG 1870
>miR774b-5p Score: 0.0 R03G_10522
Query: 1 TGAAGATGCATATTTGGAGTGAC 23
|||||
```

Sbjct: 1856 ACTTCTACGTATAAACCTCACTG 1834  
>miR774b-5p Score: 0.2 R03G\_10725  
Query: 1 TGAAGATGCATATTTGGAGTGAC 23  
|||||:|  
Sbjct: 1856 ACTTCTACGTATAAACCTCATTG 1834  
>miR774b-5p Score: 0.2 R03G\_09940  
Query: 1 TGAAGATGCATATTTGGAGTGAC 23  
|||||:|  
Sbjct: 1892 ACTTCTACGTATAAACCTCATTG 1870  
>miR774b-5p Score: 0.2 R03G\_07128  
Query: 1 TGAAGATGCATATTTGGAGTGAC 23  
|||||:|  
Sbjct: 410 ACTTCTACGTATAAACCTCATTG 388  
>miR774b-5p Score: 0.0 R03G\_07294  
Query: 1 TGAAGATGCATATTTGGAGTGAC 23  
|||||  
Sbjct: 1493 ACTTCTACGTATAAACCTCACTG 1471  
>miR774b-5p Score: 0.2 R03G\_07686  
Query: 1 TGAAGATGCATATTTGGAGTGAC 23  
|||||:|  
Sbjct: 1892 ACTTCTACGTATAAACCTCATTG 1870  
>miR774b-5p Score: 0.2 R03G\_07976  
Query: 1 TGAAGATGCATATTTGGAGTGAC 23  
|||||:|  
Sbjct: 1889 ACTTCTACGTATAAACCTCATTG 1867  
>miR774b-5p Score: 0.0 R03G\_05958  
Query: 1 TGAAGATGCATATTTGGAGTGAC 23  
|||||  
Sbjct: 1856 ACTTCTACGTATAAACCTCACTG 1834  
>miR774b-5p Score: 0.8 R03G\_06430  
Query: 1 TGAAGATGCATATTTGGAGTGAC 23  
||||:|||||:|  
Sbjct: 1856 ACTTTTACGTATAAACCTCATTG 1834  
>miR774b-5p Score: 0.0 R03G\_04785  
Query: 1 TGAAGATGCATATTTGGAGTGAC 23  
|||||  
Sbjct: 1856 ACTTCTACGTATAAACCTCACTG 1834  
>miR774b-5p Score: 0.2 R03G\_03552  
Query: 1 TGAAGATGCATATTTGGAGTGAC 23  
|||||:|  
Sbjct: 26 ACTTCTACGTATAAACCTCATTG 4  
>miR774b-5p Score: 0.5 R03G\_03580  
Query: 1 TGAAGATGCATATTTGGAGTGA-C 23  
|||||\*|  
Sbjct: 1817 ACTTCTACGTATAAACCTCACTAG 1794

>miR774b-5p Score: 0.5 R03G\_03589  
Query: 1 TGAAGATGCATATTTGGAGTGA-C 23  
|||||\*|  
Sbjct: 1817 ACTTCTACGTATAAACCTCACTAG 1794

>miR774b-5p Score: 1.0 R03G\_01207  
Query: 1 TGAAGATGCATATTTGGAGTGAC 23  
||||:||||\*||  
Sbjct: 1709 ACTTTTACGTATAAACCTCA-TG 1688

>miR774b-5p Score: 0.2 R03G\_01309  
Query: 1 TGAAGATGCATATTTGGAGTGAC 23  
||||:||||  
Sbjct: 1841 ACTTCTACGTATAAACCTCATTG 1819

>miR774b-5p Score: 0.0 R03G\_01740  
Query: 1 TGAAGATGCATATTTGGAGTGAC 23  
|||||  
Sbjct: 1856 ACTTCTACGTATAAACCTCACTG 1834

>miR774b-5p Score: 0.0 R03G\_01954  
Query: 1 TGAAGATGCATATTTGGAGTGAC 23  
|||||  
Sbjct: 842 ACTTCTACGTATAAACCTCACTG 820

>miR774b-5p Score: 0.0 R03G\_17441  
Query: 1 TGAAGATGCATATTTGGAGTGAC 23  
|||||  
Sbjct: 1619 ACTTCTACGTATAAACCTCACTG 1597

>miR774b-5p Score: 0.2 R03G\_17385  
Query: 1 TGAAGATGCATATTTGGAGTGAC 23  
||||:||||  
Sbjct: 1892 ACTTCTACGTATAAACCTCATTG 1870

>miR774b-5p Score: 0.2 R03G\_17358  
Query: 1 TGAAGATGCATATTTGGAGTGAC 23  
||||:||||  
Sbjct: 1892 ACTTCTACGTATAAACCTCATTG 1870

>miR9653a-3p Score: 2.5 R03G\_17204  
Query: 1 TTGGGACTTTGGGCTGGCC 19  
|::|||||:|\*|||  
Sbjct: 695 AGTCCTGAAACTCGTCCGG 677

>miR9653a-3p Score: 1.5 R03G\_17211  
Query: 1 TTGGGACTTTGGGCTGGCC 19  
|::|||||:|||||  
Sbjct: 815 AGTCCTGAAACTCGACCGG 797

>miR9653a-3p Score: 1.5 R03G\_17213  
Query: 1 TTGGGACTTTGGGCTGGCC 19  
|::|||||:|||||  
Sbjct: 140 AGTCCTGAAACTCGACCGG 122

>miR9653a-3p Score: 2.0 R03G\_17069

Query: 1 TTGGGACTTTGGGCTGGCC 19  
|::|||||||\*|||||  
Sbjct: 680 AGTCCTGAAACCCTACCGG 662  
>miR9653a-3p Score: 1.0 R03G\_16905  
Query: 1 TTGGGACTTTGGGCTGGCC 19  
|:|||||||:|||||||  
Sbjct: 632 AGCCCTGAAACTCGACCGG 614  
>miR9653a-3p Score: 0.5 R03G\_16715  
Query: 1 TTGGGACTTTGGGCTGGCC 19  
|:|||||||\*|||||||  
Sbjct: 275 AGCCCTGAAACCCGACCGG 257  
>miR9653a-3p Score: 2.5 R03G\_16737  
Query: 1 TTGGGACTTTGGGCTGGCC 19  
|:\*|||||:||:|||||||  
Sbjct: 449 AGGCCTGAGACTCGACCGG 431  
>miR9653a-3p Score: 2.0 R03G\_16377  
Query: 1 TTGGGACTTTGGGCTGGCC 19  
|::|:||||||:|||||||  
Sbjct: 140 AGTCTTGAAACTCGACCGG 122  
>miR9653a-3p Score: 2.5 R03G\_16541  
Query: 1 TTGGGACTTTGGGCTGGCC 19  
|:\*|||||:||:|||||||  
Sbjct: 449 AGGCCTGAGACTCGACCGG 431  
>miR9653a-3p Score: 2.0 R03G\_16548  
Query: 1 TTGGGACTTTGGGCTGGCC 19  
|::|||||||:|||||||\*  
Sbjct: 470 AGTCCTGAAACTCGACCGT 452  
>miR9653a-3p Score: 2.5 R03G\_16141  
Query: 1 TTGGGACTTTGGGCTGGCC 19  
|:\*|||||:||:|||||||  
Sbjct: 449 AGGCCTGAGACTCGACCGG 431  
>miR9653a-3p Score: 1.5 R03G\_16118  
Query: 1 TTGGGACTTTGGGCTGGCC 19  
|::|||||||:|||||||  
Sbjct: 83 AGTCCTGAAACTCGACCGG 65  
>miR9653a-3p Score: 2.5 R03G\_16121  
Query: 1 TTGGGACTTTGGGCTGGCC 19  
|:\*|||||:||:|||||||  
Sbjct: 404 AGGCCTGAGACTCGACCGG 386  
>miR9653a-3p Score: 2.5 R03G\_15672  
Query: 1 TTGGGACTTTGGGCTGGCC 19  
|::|||||||:||\*|||||  
Sbjct: 632 AGTCCTGAAACTCGTCCGG 614  
>miR9653a-3p Score: 1.5 R03G\_15873  
Query: 1 TTGGGACTTTGGGCTGGCC 19



|::|||||||:|||||||  
Sbjct: 815 AGTCCTGAAACTCGACCGG 797  
>miR9653a-3p Score: 2.5 R03G\_15286  
Query: 1 TTGGGACTTTGGGCTGGCC 19  
|:\*|||||:||:|||||||  
Sbjct: 449 AGGCCTGAGACTCGACCGG 431  
>miR9653a-3p Score: 2.5 R03G\_14972  
Query: 1 TTGGGACTTTGGGCTGGCC 19  
|:|||||||\*|\*|||||  
Sbjct: 746 AGCCCTGAAACACCACCGG 728  
>miR9653a-3p Score: 2.5 R03G\_14981  
Query: 1 TTGGGACTTTGGGCTGGCC 19  
|:\*|||||:||:|||||||  
Sbjct: 449 AGGCCTGAGACTCGACCGG 431  
>miR9653a-3p Score: 2.5 R03G\_14987  
Query: 1 TTGGGACTTTGGGCTGGCC 19  
|::|||||||:||\*|||||  
Sbjct: 479 AGTCCTGAAACTCGTCCGG 461  
>miR9653a-3p Score: 2.0 R03G\_14989  
Query: 1 TTGGGACTTTGGGCTGGCC 19  
|:|||||||:||\*|||||  
Sbjct: 671 AGCCCTGAAACTCGTCCGG 653  
>miR9653a-3p Score: 2.5 R03G\_15145  
Query: 1 TTGGGACTTTGGGCTGGCC 19  
|:\*|||||:||:|||||||  
Sbjct: 449 AGGCCTGAGACTCGACCGG 431  
>miR9653a-3p Score: 1.5 R03G\_15154  
Query: 1 TTGGGACTTTGGGCTGGCC 19  
|::|||||||:|||||||  
Sbjct: 815 AGTCCTGAAACTCGACCGG 797  
>miR9653a-3p Score: 2.5 R03G\_15170  
Query: 1 TTGGGACTTTGGGCTGGCC 19  
|:\*|||||:||:|||||||  
Sbjct: 449 AGGCCTGAGACTCGACCGG 431  
>miR9653a-3p Score: 2.0 R03G\_14361  
Query: 1 TTGGGACTTTGGGCTGGCC 19  
|::|||||||\*|\*|||||  
Sbjct: 815 AGTCCTGAAACCCTACCGG 797  
>miR9653a-3p Score: 2.0 R03G\_14568  
Query: 1 TTGGGACTTTGGGCTGGCC 19  
|:|||||||\*|\*|||||  
Sbjct: 815 AGTCCTGAAACCCTACCGG 797  
>miR9653a-3p Score: 2.5 R03G\_14620  
Query: 1 TTGGGACTTTGGGCTGGCC 19  
|::|||||||:||\*|||||

Sbjct: 260 AGTCCTGAAACTCGTCCGG 242  
>miR9653a-3p Score: 2.5 R03G\_14772  
Query: 1 TTGGGACTTTGGGCTGGCC 19  
|::|||||||:|\*|||  
Sbjct: 710 AGTCCTGAAACTCGTCCGG 692  
>miR9653a-3p Score: 2.5 R03G\_14784  
Query: 1 TTGGGACTTTGGGCTGGCC 19  
|:\*|||||:|:|||||  
Sbjct: 449 AGGCCTGAGACTCGACCGG 431  
>miR9653a-3p Score: 1.5 R03G\_13447  
Query: 1 TTGGGACTTTGGGCTGGCC 19  
|::|||||||:|||||  
Sbjct: 815 AGTCCTGAAACTCGACCGG 797  
>miR9653a-3p Score: 1.5 R03G\_13706  
Query: 1 TTGGGACTTTGGGCTGGCC 19  
|::|||||||:|||||  
Sbjct: 773 AGTCCTGAAACTCGACCGG 755  
>miR9653a-3p Score: 2.5 R03G\_13752  
Query: 1 TTGGGACTTTGGGCTGGCC 19  
|:\*|||||:|:|||||  
Sbjct: 449 AGGCCTGAGACTCGACCGG 431  
>miR9653a-3p Score: 2.0 R03G\_13857  
Query: 1 TTGGGACTTTGGGCTGGCC 19  
|:|||||||:|\*|||  
Sbjct: 455 AGCCCTGAAACTCGTCCGG 437  
>miR9653a-3p Score: 2.5 R03G\_12670  
Query: 1 TTGGGACTTTGGGCTGGCC 19  
|::|||||||:|\*|||  
Sbjct: 632 AGTCCTGAAACTCGTCCGG 614  
>miR9653a-3p Score: 2.5 R03G\_12950  
Query: 1 TTGGGACTTTGGGCTGGCC 19  
|:\*|||||:|:|||||  
Sbjct: 449 AGGCCTGAGACTCGACCGG 431  
>miR9653a-3p Score: 1.5 R03G\_13276  
Query: 1 TTGGGACTTTGGGCTGGCC 19  
|::|||||||:|||||  
Sbjct: 197 AGTCCTGAAACTCGACCGG 179  
>miR9653a-3p Score: 2.0 R03G\_11966  
Query: 1 TTGGGACTTTGGGCTGGCC 19  
|:|||||||\*|||  
Sbjct: 815 AGTCCTGAAACCCTACCGG 797  
>miR9653a-3p Score: 1.5 R03G\_12013  
Query: 1 TTGGGACTTTGGGCTGGCC 19  
|::|||||||:|||||  
Sbjct: 140 AGTCCTGAAACTCGACCGG 122

>miR9653a-3p Score: 2.5 R03G\_12082  
Query: 1 TTGGGACTTTGGGCTGGCC 19  
|::|||||||:|\*|||  
Sbjct: 710 AGTCCTGAAACTCGTCCGG 692

>miR9653a-3p Score: 1.5 R03G\_12174  
Query: 1 TTGGGACTTTGGGCTGGCC 19  
|::|||||||:|||||||  
Sbjct: 140 AGTCCTGAAACTCGACCGG 122

>miR9653a-3p Score: 2.0 R03G\_12186  
Query: 1 TTGGGACTTTGGGCTGGCC 19  
|:\*|||||||:|||||||  
Sbjct: 824 AGACCTGAAACTCGACCGG 806

>miR9653a-3p Score: 2.0 R03G\_12196  
Query: 1 TTGGGACTTTGGGCTGGCC 19  
|:\*|||||||:|||||||  
Sbjct: 746 AGACCTGAAACTCGACCGG 728

>miR9653a-3p Score: 1.0 R03G\_12525  
Query: 1 TTGGGACTTTGGGCTGGCC 19  
|:|||||||:|||||||  
Sbjct: 746 AGCCCTGAAACTCGACCGG 728

>miR9653a-3p Score: 1.5 R03G\_12526  
Query: 1 TTGGGACTTTGGGCTGGCC 19  
|::|||||||:|||||||  
Sbjct: 815 AGTCCTGAAACTCGACCGG 797

>miR9653a-3p Score: 2.5 R03G\_11158  
Query: 1 TTGGGACTTTGGGCTGGCC 19  
|||::|||\*|||:|||||||  
Sbjct: 480 AACTTTGACACCTGACCGG 462

>miR9653a-3p Score: 1.5 R03G\_11244  
Query: 1 TTGGGACTTTGGGCTGGCC 19  
|::|||||||:|||||||  
Sbjct: 815 AGTCCTGAAACTCGACCGG 797

>miR9653a-3p Score: 1.5 R03G\_11263  
Query: 1 TTGGGACTTTGGGCTGGCC 19  
|::|||||||:|||||||  
Sbjct: 140 AGTCCTGAAACTCGACCGG 122

>miR9653a-3p Score: 1.0 R03G\_11273  
Query: 1 TTGGGACTTTGGGCTGGCC 19  
|:|||||||:|||||||  
Sbjct: 155 AGCCCTGAAACTCGACCGG 137

>miR9653a-3p Score: 2.5 R03G\_11405  
Query: 1 TTGGGACTTTGGGCTGGCC 19  
|::|||||||:|\*|||  
Sbjct: 632 AGTCCTGAAACTCGTCCGG 614

>miR9653a-3p Score: 1.5 R03G\_11528

Query: 1 TTGGGACTTTGGGCTGGCC 19  
|::|||||||:|||||||  
Sbjct: 140 AGTCCTGAAACTCGACCGG 122  
>miR9653a-3p Score: 2.5 R03G\_11533  
Query: 1 TTGGGACTTTGGGCTGGCC 19  
|:\*|||||:||:|||||||  
Sbjct: 449 AGGCCTGAGACTCGACCGG 431  
>miR9653a-3p Score: 2.5 R03G\_11534  
Query: 1 TTGGGACTTTGGGCTGGCC 19  
|::||\*|||||:|||||||  
Sbjct: 815 AGTCCCGAAACTCGACCGG 797  
>miR9653a-3p Score: 2.5 R03G\_11536  
Query: 1 TTGGGACTTTGGGCTGGCC 19  
|:\*|||||:||:|||||||  
Sbjct: 449 AGGCCTGAGACTCGACCGG 431  
>miR9653a-3p Score: 1.5 R03G\_11948  
Query: 1 TTGGGACTTTGGGCTGGCC 19  
|::|||||||:|||||||  
Sbjct: 815 AGTCCTGAAACTCGACCGG 797  
>miR9653a-3p Score: 1.5 R03G\_10528  
Query: 1 TTGGGACTTTGGGCTGGCC 19  
|::|||||||:|||||||  
Sbjct: 140 AGTCCTGAAACTCGACCGG 122  
>miR9653a-3p Score: 1.5 R03G\_10537  
Query: 1 TTGGGACTTTGGGCTGGCC 19  
|::|||||||:|||||||  
Sbjct: 638 AGTCCTGAAACTCGACCGG 620  
>miR9653a-3p Score: 1.5 R03G\_10720  
Query: 1 TTGGGACTTTGGGCTGGCC 19  
|::|||||||:|||||||  
Sbjct: 815 AGTCCTGAAACTCGACCGG 797  
>miR9653a-3p Score: 2.5 R03G\_10729  
Query: 1 TTGGGACTTTGGGCTGGCC 19  
|::|||||||\*|:|||  
Sbjct: 815 AGTCCTGAAACCCTATCGG 797  
>miR9653a-3p Score: 1.5 R03G\_10742  
Query: 1 TTGGGACTTTGGGCTGGCC 19  
|::|||||||:|||||||  
Sbjct: 140 AGTCCTGAAACTCGACCGG 122  
>miR9653a-3p Score: 1.5 R03G\_10805  
Query: 1 TTGGGACTTTGGGCTGGCC 19  
|:||||\*|||||||  
Sbjct: 824 AGCCCTTAAACCCGACCGG 806  
>miR9653a-3p Score: 0.0 R03G\_10862  
Query: 1 TTGGGACTTTGGGCTGGCC 19

|||||  
Sbjct: 347 AACCTGAAACCCGACCGG 329  
>miR9653a-3p Score: 1.5 R03G\_09199  
Query: 1 TTGGGACTTTGGGCTGGCC 19  
|::|  
Sbjct: 815 AGTCCTGAAACTCGACCGG 797  
>miR9653a-3p Score: 1.5 R03G\_09924  
Query: 1 TTGGGACTTTGGGCTGGCC 19  
|::|  
Sbjct: 815 AGTCCTGAAACTCGACCGG 797  
>miR9653a-3p Score: 2.5 R03G\_09926  
Query: 1 TTGGGACTTTGGGCTGGCC 19  
|:\*|  
Sbjct: 449 AGGCCTGAGACTCGACCGG 431  
>miR9653a-3p Score: 2.5 R03G\_09944  
Query: 1 TTGGGACTTTGGGCTGGCC 19  
|::|\*|  
Sbjct: 632 AGTCCTGAAACTCGTCCGG 614  
>miR9653a-3p Score: 1.0 R03G\_09955  
Query: 1 TTGGGACTTTGGGCTGGCC 19  
|:|  
Sbjct: 509 AGCCCTGAAACTCGACCGG 491  
>miR9653a-3p Score: 2.0 R03G\_09967  
Query: 1 TTGGGACTTTGGGCTGGCC 19  
|::|\*|  
Sbjct: 815 AGTCCTGAAACCCTACCGG 797  
>miR9653a-3p Score: 1.5 R03G\_10044  
Query: 1 TTGGGACTTTGGGCTGGCC 19  
|::|  
Sbjct: 815 AGTCCTGAAACTCGACCGG 797  
>miR9653a-3p Score: 2.5 R03G\_10050  
Query: 1 TTGGGACTTTGGGCTGGCC 19  
|:\*|  
Sbjct: 449 AGGCCTGAGACTCGACCGG 431  
>miR9653a-3p Score: 2.5 R03G\_10224  
Query: 1 TTGGGACTTTGGGCTGGCC 19  
|::|\*|  
Sbjct: 632 AGTCCTGAAACTCGTCCGG 614  
>miR9653a-3p Score: 2.5 R03G\_10226  
Query: 1 TTGGGACTTTGGGCTGGCC 19  
|::|\*|  
Sbjct: 632 AGTCCTGAAACTCGTCCGG 614  
>miR9653a-3p Score: 1.5 R03G\_07994  
Query: 1 TTGGGACTTTGGGCTGGCC 19  
|::|

Sbjct: 815 AGTCCTGAAACTCGACCGG 797  
>miR9653a-3p Score: 2.5 R03G\_08649  
Query: 1 TTGGGACTTTGGGCTGGCC 19  
|::|||||||:|\*|||  
Sbjct: 577 AGTCCTGAAACTCGTCCGG 559  
>miR9653a-3p Score: 2.0 R03G\_08658  
Query: 1 TTGGGACTTTGGGCTGGCC 19  
|:|||||||:|\*|||  
Sbjct: 632 AGCCCTGAAACTCGTCCGG 614  
>miR9653a-3p Score: 1.5 R03G\_08835  
Query: 1 TTGGGACTTTGGGCTGGCC 19  
|::|||||||:|||||||  
Sbjct: 125 AGTCCTGAAACTCGACCGG 107  
>miR9653a-3p Score: 2.5 R03G\_08848  
Query: 1 TTGGGACTTTGGGCTGGCC 19  
|::||\*|||||:|||||||  
Sbjct: 125 AGTCCCGAAACTCGACCGG 107  
>miR9653a-3p Score: 1.0 R03G\_07024  
Query: 1 TTGGGACTTTGGGCTGGCC 19  
|:|||||||:|||||||  
Sbjct: 824 AGCCCTGAAACTCGACCGG 806  
>miR9653a-3p Score: 1.5 R03G\_07119  
Query: 1 TTGGGACTTTGGGCTGGCC 19  
|:|||||||:|||||||  
Sbjct: 140 AGTCCTGAAACTCGACCGG 122  
>miR9653a-3p Score: 1.0 R03G\_07121  
Query: 1 TTGGGACTTTGGGCTGGCC 19  
|:|||||||:|||||||  
Sbjct: 824 AGCCCTGAAACTCGACCGG 806  
>miR9653a-3p Score: 1.5 R03G\_07295  
Query: 1 TTGGGACTTTGGGCTGGCC 19  
|:|||||||:|||||||  
Sbjct: 647 AGTCCTGAAACTCGACCGG 629  
>miR9653a-3p Score: 2.5 R03G\_07298  
Query: 1 TTGGGACTTTGGGCTGGCC 19  
|:\*|||||:|:|||||||  
Sbjct: 449 AGGCCTGAGACTCGACCGG 431  
>miR9653a-3p Score: 2.5 R03G\_07302  
Query: 1 TTGGGACTTTGGGCTGGCC 19  
|:|||||||:|\*|||  
Sbjct: 632 AGTCCTGAAACTCGTCCGG 614  
>miR9653a-3p Score: 2.0 R03G\_07651  
Query: 1 TTGGGACTTTGGGCTGGCC 19  
|||||||:|:|\*||  
Sbjct: 5211 AACCTGAAACTCGAT-GG 5194

>miR9653a-3p Score: 1.5 R03G\_07683  
Query: 1 TTGGGACTTTGGGCTGGCC 19  
|::|||||||:|||||||  
Sbjct: 815 AGTCCTGAAACTCGACCGG 797

>miR9653a-3p Score: 2.5 R03G\_07689  
Query: 1 TTGGGACTTTGGGCTGGCC 19  
|::|||||||:|\*|||  
Sbjct: 632 AGTCCTGAAACTCGTCCGG 614

>miR9653a-3p Score: 2.5 R03G\_07723  
Query: 1 TTGGGACTTTGGGCTGGCC 19  
|:\*|||||:||:|||||||  
Sbjct: 449 AGGCCTGAGACTCGACCGG 431

>miR9653a-3p Score: 2.0 R03G\_07860  
Query: 1 TTGGGACTTTGGGCTGGCC 19  
|::|||||||\*|||  
Sbjct: 815 AGTCCTGAAACCCTACCGG 797

>miR9653a-3p Score: 2.5 R03G\_05522  
Query: 1 TTGGGACTTTGGGCTGGCC 19  
|:\*|||||:||:|||||||  
Sbjct: 815 AGGCCTGAGACTCGACCGG 797

>miR9653a-3p Score: 1.5 R03G\_05916  
Query: 1 TTGGGACTTTGGGCTGGCC 19  
|::|||||||:|||||||  
Sbjct: 815 AGTCCTGAAACTCGACCGG 797

>miR9653a-3p Score: 2.0 R03G\_05921  
Query: 1 TTGGGACTTTGGGCTGGCC 19  
|::|||||||\*|||  
Sbjct: 815 AGTCCTGAAACCCTACCGG 797

>miR9653a-3p Score: 0.5 R03G\_05950  
Query: 1 TTGGGACTTTGGGCTGGCC 19  
|:|||||||  
Sbjct: 293 AGCCCTGAAACCCGACCGG 275

>miR9653a-3p Score: 2.0 R03G\_05953  
Query: 1 TTGGGACTTTGGGCTGGCC 19  
|::|||||||\*|||  
Sbjct: 815 AGTCCTGAAACCCTACCGG 797

>miR9653a-3p Score: 2.0 R03G\_05959  
Query: 1 TTGGGACTTTGGGCTGGCC 19  
|::|||||||\*|||  
Sbjct: 815 AGTCCTGAAACCCTACCGG 797

>miR9653a-3p Score: 2.5 R03G\_06721  
Query: 1 TTGGGACTTTGGGCTGGCC 19  
|::|||||||:|\*|||  
Sbjct: 629 AGTCCTGAAACTCGTCCGG 611

>miR9653a-3p Score: 2.5 R03G\_04654

Query: 1 TTGGGACTTTGGGCTGGCC 19  
|::|||||||:|\*|||  
Sbjct: 632 AGTCCTGAAACTCGTCCGG 614  
>miR9653a-3p Score: 1.5 R03G\_04661  
Query: 1 TTGGGACTTTGGGCTGGCC 19  
|:|||||||\*|||  
Sbjct: 455 AGCCCTGAAACCCGTCCGG 437  
>miR9653a-3p Score: 2.5 R03G\_04668  
Query: 1 TTGGGACTTTGGGCTGGCC 19  
|:\*|||||:|:|||||  
Sbjct: 626 AGGCCTGAGACTCGACCGG 608  
>miR9653a-3p Score: 1.0 R03G\_04786  
Query: 1 TTGGGACTTTGGGCTGGCC 19  
|:|||||||:|||||  
Sbjct: 392 AGCCCTGAAACTCGACCGG 374  
>miR9653a-3p Score: 2.0 R03G\_05267  
Query: 1 TTGGGACTTTGGGCTGGCC 19  
|::|||||||\*|||  
Sbjct: 815 AGTCCTGAAACCCTACCGG 797  
>miR9653a-3p Score: 2.5 R03G\_05516  
Query: 1 TTGGGACTTTGGGCTGGCC 19  
|:\*|||||:|:|||||  
Sbjct: 449 AGGCCTGAGACTCGACCGG 431  
>miR9653a-3p Score: 1.0 R03G\_02700  
Query: 1 TTGGGACTTTGGGCTGGCC 19  
|:|||||||:|||||  
Sbjct: 509 AGCCCTGAAACTCGACCGG 491  
>miR9653a-3p Score: 1.5 R03G\_03558  
Query: 1 TTGGGACTTTGGGCTGGCC 19  
|::|||||||:|||||  
Sbjct: 815 AGTCCTGAAACTCGACCGG 797  
>miR9653a-3p Score: 2.5 R03G\_03560  
Query: 1 TTGGGACTTTGGGCTGGCC 19  
|:\*|||||:|:|||||  
Sbjct: 449 AGGCCTGAGACTCGACCGG 431  
>miR9653a-3p Score: 1.0 R03G\_03570  
Query: 1 TTGGGACTTTGGGCTGGCC 19  
|:|||||||:|||||  
Sbjct: 509 AGCCCTGAAACTCGACCGG 491  
>miR9653a-3p Score: 2.0 R03G\_03599  
Query: 1 TTGGGACTTTGGGCTGGCC 19  
|:||||\*||||:|||||  
Sbjct: 824 AGCCCTAAAACCTCGACCGG 806  
>miR9653a-3p Score: 0.5 R03G\_03605  
Query: 1 TTGGGACTTTGGGCTGGCC 19



|:||||||||||||||  
Sbjct: 1277 AGCCCTGAAACCCGACCGG 1259  
>miR9653a-3p Score: 1.5 R03G\_03617  
Query: 1 TTGGGACTTTGGGCTGGCC 19  
|::|||||||:|||||||  
Sbjct: 815 AGTCCTGAAACTCGACCGG 797  
>miR9653a-3p Score: 2.5 R03G\_03785  
Query: 1 TTGGGACTTTGGGCTGGCC 19  
|::|||||||:||\*|||  
Sbjct: 437 AGTCCTGAAACTCGTCCGG 419  
>miR9653a-3p Score: 2.5 R03G\_03791  
Query: 1 TTGGGACTTTGGGCTGGCC 19  
|:\*|||||:||:|||||||  
Sbjct: 449 AGGCCTGAGACTCGACCGG 431  
>miR9653a-3p Score: 2.5 R03G\_03797  
Query: 1 TTGGGACTTTGGGCTGGCC 19  
|::|||||||:||\*|||  
Sbjct: 320 AGTCCTGAAACTCGTCCGG 302  
>miR9653a-3p Score: 1.5 R03G\_03987  
Query: 1 TTGGGACTTTGGGCTGGCC 19  
|::|||||||:|||||||  
Sbjct: 815 AGTCCTGAAACTCGACCGG 797  
>miR9653a-3p Score: 2.5 R03G\_04200  
Query: 1 TTGGGACTTTGGGCTGGCC 19  
|::|||||||:||\*|||  
Sbjct: 632 AGTCCTGAAACTCGTCCGG 614  
>miR9653a-3p Score: 2.5 R03G\_04207  
Query: 1 TTGGGACTTTGGGCTGGCC 19  
|::|:|||||||\*|||  
Sbjct: 815 AGTCTTGAAACCCTACCGG 797  
>miR9653a-3p Score: 2.5 R03G\_00240  
Query: 1 TTGGGACTTTGGGCTGGCC 19  
|:\*|||||:||:|||||||  
Sbjct: 758 AGGCCTGAGACTCGACCGG 740  
>miR9653a-3p Score: 2.5 R03G\_00247  
Query: 1 TTGGGACTTTGGGCTGGCC 19  
|::|||||||:||\*|||  
Sbjct: 632 AGTCCTGAAACTCGTCCGG 614  
>miR9653a-3p Score: 2.0 R03G\_00256  
Query: 1 TTGGGACTTTGGGCTGGCC 19  
|::|||||||\*|||  
Sbjct: 815 AGTCCTGAAACCCTACCGG 797  
>miR9653a-3p Score: 2.5 R03G\_00675  
Query: 1 TTGGGACTTTGGGCTGGCC 19  
|:\*|||||:||:|||||||

Sbjct: 449 AGGCCTGAGACTCGACCGG 431  
>miR9653a-3p Score: 0.5 R03G\_00677  
Query: 1 TTGGGACTTTGGGCTGGCC 19  
|:|||||||||||||||  
Sbjct: 377 AGCCCTGAAACCCGACCGG 359  
>miR9653a-3p Score: 2.5 R03G\_00689  
Query: 1 TTGGGACTTTGGGCTGGCC 19  
|:\*|||||:|:|||||||  
Sbjct: 317 AGGCCTGAGACTCGACCGG 299  
>miR9653a-3p Score: 1.0 R03G\_00690  
Query: 1 TTGGGACTTTGGGCTGGCC 19  
|:|||||||||:|||||||  
Sbjct: 764 AGCCCTGAAACTCGACCGG 746  
>miR9653a-3p Score: 1.5 R03G\_01194  
Query: 1 TTGGGACTTTGGGCTGGCC 19  
|::|||||||||:|||||||  
Sbjct: 815 AGTCCTGAAACTCGACCGG 797  
>miR9653a-3p Score: 1.5 R03G\_01313  
Query: 1 TTGGGACTTTGGGCTGGCC 19  
|::|||||||||:|||||||  
Sbjct: 815 AGTCCTGAAACTCGACCGG 797  
>miR9653a-3p Score: 2.0 R03G\_01587  
Query: 1 TTGGGACTTTGGGCTGGCC 19  
|:|||||||||:|\*|||||  
Sbjct: 641 AGCCCTGAAACTCGTCCGG 623  
>miR9653a-3p Score: 0.5 R03G\_01588  
Query: 1 TTGGGACTTTGGGCTGGCC 19  
|:|||||||||:|||||||  
Sbjct: 155 AGCCCTGAAACCCGACCGG 137  
>miR9653a-3p Score: 2.5 R03G\_01725  
Query: 1 TTGGGACTTTGGGCTGGCC 19  
|:\*|||||:|:|||||||  
Sbjct: 449 AGGCCTGAGACTCGACCGG 431  
>miR9653a-3p Score: 1.5 R03G\_01735  
Query: 1 TTGGGACTTTGGGCTGGCC 19  
|::|||||||||:|||||||  
Sbjct: 815 AGTCCTGAAACTCGACCGG 797  
>miR9653a-3p Score: 1.0 R03G\_01925  
Query: 1 TTGGGACTTTGGGCTGGCC 19  
|:|||||||||:|||||||  
Sbjct: 824 AGCCCTGAAACTCGACCGG 806  
>miR9653a-3p Score: 1.5 R03G\_01950  
Query: 1 TTGGGACTTTGGGCTGGCC 19  
|::|||||||||:|||||||  
Sbjct: 815 AGTCCTGAAACTCGACCGG 797

>miR9653a-3p Score: 1.5 R03G\_01951  
Query: 1 TTGGGACTTTGGGCTGGCC 19  
|::|||||||:|||||||  
Sbjct: 815 AGTCCTGAAACTCGACCGG 797  
>miR9653a-3p Score: 2.5 R03G\_02227  
Query: 1 TTGGGACTTTGGGCTGGCC 19  
|:\*|||||:||:|||||||  
Sbjct: 815 AGGCCTGAGACTCGACCGG 797  
>miR9653a-3p Score: 2.0 R03G\_17449  
Query: 1 TTGGGACTTTGGGCTGGCC 19  
|::|||||||\*|||||  
Sbjct: 815 AGTCCTGAAACCCTACCGG 797  
>miR9653a-3p Score: 2.5 R03G\_17436  
Query: 1 TTGGGACTTTGGGCTGGCC 19  
|::|||||||:||\*|||||  
Sbjct: 632 AGTCCTGAAACTCGTCCGG 614  
>miR9653a-3p Score: 2.5 R03G\_17423  
Query: 1 TTGGGACTTTGGGCTGGCC 19  
|:\*|||||:||:|||||||  
Sbjct: 449 AGGCCTGAGACTCGACCGG 431  
>miR9653a-3p Score: 1.5 R03G\_17409  
Query: 1 TTGGGACTTTGGGCTGGCC 19  
|::|||||||:|||||||  
Sbjct: 815 AGTCCTGAAACTCGACCGG 797  
>miR9653a-3p Score: 0.5 R03G\_17406  
Query: 1 TTGGGACTTTGGGCTGGCC 19  
|:|||||||  
Sbjct: 176 AGCCCTGAAACCCGACCGG 158  
>miR9653a-3p Score: 2.0 R03G\_17361  
Query: 1 TTGGGACTTTGGGCTGGCC 19  
|:|||||||:||\*|||||  
Sbjct: 392 AGCCCTGAAACTCGTCCGG 374  
>miR9653a-3p Score: 2.5 R03G\_17328  
Query: 1 TTGGGACTTTGGGCTGGCC 19  
|:\*|||||:||:|||||||  
Sbjct: 449 AGGCCTGAGACTCGACCGG 431  
>miR9653a-3p Score: 2.5 R03G\_17293  
Query: 1 TTGGGACTTTGGGCTGGCC 19  
|::|||||||:||\*|||||  
Sbjct: 632 AGTCCTGAAACTCGTCCGG 614  
>miR9653a-3p Score: 2.5 R03G\_17092  
Query: 1 TTGGGACTTTGGGCTGGCC 19  
|:\*|||||:||:|||||||  
Sbjct: 449 AGGCCTGAGACTCGACCGG 431  
>miR419 Score: 2.0 R03G\_17196



|||\*|||||||\*|||\*  
Sbjct: 491 ACTACTTACTACTGAACTA 473  
>miR7734-3p Score: 1.0 R03G\_17257  
Query: 1 TGGAACCAGTCCACATTCAACG 22  
|||||||:|||||||\*|  
Sbjct: 584 ACCTTGGTTAGGTGTAAGTTAC 563  
>miR7734-3p Score: 2.5 R03G\_17240  
Query: 1 TGGAACCAGTCCACATTCAACG 22  
||:|||||:||\*|||||||\*|  
Sbjct: 596 ACTTTGGTTAGTTGTAAGTTAC 575  
>miR7734-3p Score: 2.5 R03G\_17212  
Query: 1 TGGAACCAGTCCACATTCAACG 22  
||:|||||:||\*|||||||\*|  
Sbjct: 584 ACTTTGGTTAGTTGTAAGTTAC 563  
>miR7734-3p Score: 0.0 R03G\_16827  
Query: 1 TGGAACCAGTCCACATTCAACG 22  
|||||||  
Sbjct: 668 ACCTTGGTCAGGTGTAAGTTGC 647  
>miR7734-3p Score: 2.0 R03G\_16739  
Query: 1 TGGAACCAGTCCACATTCAACG 22  
||:|||||:||\*|||||||  
Sbjct: 887 ACTTTGGTTAGCTGTAAGTTGC 866  
>miR7734-3p Score: 0.0 R03G\_16749  
Query: 1 TGGAACCAGTCCACATTCAACG 22  
|||||||  
Sbjct: 668 ACCTTGGTCAGGTGTAAGTTGC 647  
>miR7734-3p Score: 1.0 R03G\_16136  
Query: 1 TGGAACCAGTCCACATTCAACG 22  
|||||||:|||||||\*|  
Sbjct: 584 ACCTTGGTTAGGTGTAAGTTAC 563  
>miR7734-3p Score: 2.5 R03G\_16138  
Query: 1 TGGAACCAGTCCACATTCAACG 22  
||:|||||:||\*|||||\*|||  
Sbjct: 887 ACTTTGGTTAGCTGTAAATTGC 866  
>miR7734-3p Score: 1.0 R03G\_15889  
Query: 1 TGGAACCAGTCCACATTCAACG 22  
|||||||:|||||||\*|  
Sbjct: 584 ACCTTGGTTAGGTGTAAGTTAC 563  
>miR7734-3p Score: 0.0 R03G\_15898  
Query: 1 TGGAACCAGTCCACATTCAACG 22  
|||||||  
Sbjct: 668 ACCTTGGTCAGGTGTAAGTTGC 647  
>miR7734-3p Score: 2.5 R03G\_15580  
Query: 1 TGGAACCAGTCCACATTCAACG 22  
||:|||||:||\*|||||||\*|

Sbjct: 851 ACTTTGGTTAGCTGTAAGTTTC 830  
>miR7734-3p Score: 1.0 R03G\_14991  
Query: 1 TGGAACCAGTCCACATTCAACG 22  
|||||||:|||||||\*|  
Sbjct: 29 ACCTTGGTTAGGTGTAAGTTAC 8  
>miR7734-3p Score: 0.0 R03G\_14550  
Query: 1 TGGAACCAGTCCACATTCAACG 22  
|||||||  
Sbjct: 668 ACCTTGGTCAGGTGTAAGTTGC 647  
>miR7734-3p Score: 2.5 R03G\_14626  
Query: 1 TGGAACCAGTCCACATTCAACG 22  
||:|||||:||\*|||||||\*|  
Sbjct: 887 ACTTTGGTTAGCTGTAAGTTTC 866  
>miR7734-3p Score: 2.0 R03G\_14710  
Query: 1 TGGAACCAGTCCACATTCAACG 22  
||:|||||:||\*|||||||  
Sbjct: 887 ACTTTGGTTAGCTGTAAGTTGC 866  
>miR7734-3p Score: 2.5 R03G\_13866  
Query: 1 TGGAACCAGTCCACATTCAACG 22  
||:|||||:||\*|||||||\*|  
Sbjct: 719 ACTTTGGTTAGCTGTAAGTTTC 698  
>miR7734-3p Score: 2.0 R03G\_13747  
Query: 1 TGGAACCAGTCCACATTCAACG 22  
||:|||||:||\*|||||||  
Sbjct: 887 ACTTTGGTTAGCTGTAAGTTGC 866  
>miR7734-3p Score: 0.0 R03G\_13145  
Query: 1 TGGAACCAGTCCACATTCAACG 22  
|||||||  
Sbjct: 668 ACCTTGGTCAGGTGTAAGTTGC 647  
>miR7734-3p Score: 2.5 R03G\_13148  
Query: 1 TGGAACCAGTCCACATTCAACG 22  
||:|||||:||\*|||||||\*|  
Sbjct: 620 ACTTTGGTTAGCTGTAAGTTTC 599  
>miR7734-3p Score: 0.0 R03G\_13273  
Query: 1 TGGAACCAGTCCACATTCAACG 22  
|||||||  
Sbjct: 668 ACCTTGGTCAGGTGTAAGTTGC 647  
>miR7734-3p Score: 0.0 R03G\_11969  
Query: 1 TGGAACCAGTCCACATTCAACG 22  
|||||||  
Sbjct: 668 ACCTTGGTCAGGTGTAAGTTGC 647  
>miR7734-3p Score: 2.0 R03G\_12009  
Query: 1 TGGAACCAGTCCACATTCAACG 22  
||:|||||:||\*|||||||  
Sbjct: 887 ACTTTGGTTAGCTGTAAGTTGC 866

>miR7734-3p Score: 2.0 R03G\_12072  
Query: 1 TGGAACCAGTCCACATTCAACG 22  
||:|||||:|\*|||||||  
Sbjct: 887 ACTTTGGTTAGCTGTAAGTTGC 866

>miR7734-3p Score: 2.5 R03G\_12169  
Query: 1 TGGAACCAGTCCACATTCAACG 22  
||:|||||:|\*|||||||\*|  
Sbjct: 887 ACTTTGGTTAGCTGTAAGTTTC 866

>miR7734-3p Score: 0.0 R03G\_11237  
Query: 1 TGGAACCAGTCCACATTCAACG 22  
|||||||  
Sbjct: 668 ACCTTGGTCAGGTGTAAGTTGC 647

>miR7734-3p Score: 2.5 R03G\_11404  
Query: 1 TGGAACCAGTCCACATTCAACG 22  
||:|||||:|\*|||||||\*|  
Sbjct: 887 ACTTTGGTTAGCTGTAAGTTAC 866

>miR7734-3p Score: 0.0 R03G\_11409  
Query: 1 TGGAACCAGTCCACATTCAACG 22  
|||||||  
Sbjct: 668 ACCTTGGTCAGGTGTAAGTTGC 647

>miR7734-3p Score: 2.5 R03G\_11531  
Query: 1 TGGAACCAGTCCACATTCAACG 22  
||:|||||:|\*|||||||\*|  
Sbjct: 380 ACTTTGGTTAGCTGTAAGTTTC 359

>miR7734-3p Score: 0.0 R03G\_11538  
Query: 1 TGGAACCAGTCCACATTCAACG 22  
|||||||  
Sbjct: 668 ACCTTGGTCAGGTGTAAGTTGC 647

>miR7734-3p Score: 2.5 R03G\_11542  
Query: 1 TGGAACCAGTCCACATTCAACG 22  
||:|||||:|\*|||||||\*|  
Sbjct: 584 ACTTTGGTTAGTTGTAAGTTAC 563

>miR7734-3p Score: 2.5 R03G\_11771  
Query: 1 TGGAACCAGTCCACATTCAACG 22  
||:|||||:|\*|||||||\*|  
Sbjct: 887 ACTTTGGTTAGCTGTAAGTTTC 866

>miR7734-3p Score: 1.0 R03G\_11949  
Query: 1 TGGAACCAGTCCACATTCAACG 22  
|||||||:|||||||\*|  
Sbjct: 29 ACCTTGGTTAGGTGTAAGTTAC 8

>miR7734-3p Score: 2.5 R03G\_10522  
Query: 1 TGGAACCAGTCCACATTCAACG 22  
||:|||||:|\*|||||||\*|  
Sbjct: 851 ACTTTGGTTAGCTGTAAGTTTC 830

>miR7734-3p Score: 2.0 R03G\_10725

Query: 1 TGGAACCAGTCCACATTCAACG 22  
||:|||||:|\*|||||||  
Sbjct: 851 ACTTTGGTTAGCTGTAAGTTGC 830  
>miR7734-3p Score: 1.0 R03G\_10735  
Query: 1 TGGAACCAGTCCACATTCAACG 22  
|||||||:|||||||\*|  
Sbjct: 113 ACCTTGGTTAGGTGTAAGTTAC 92  
>miR7734-3p Score: 2.0 R03G\_09192  
Query: 1 TGGAACCAGTCCACATTCAACG 22  
||:|||||:|\*|||||||  
Sbjct: 887 ACTTTGGTTAGCTGTAAGTTGC 866  
>miR7734-3p Score: 0.0 R03G\_09601  
Query: 1 TGGAACCAGTCCACATTCAACG 22  
|||||||:|||||||\*|  
Sbjct: 668 ACCTTGGTCAGGTGTAAGTTGC 647  
>miR7734-3p Score: 0.0 R03G\_09930  
Query: 1 TGGAACCAGTCCACATTCAACG 22  
|||||||:|||||||\*|  
Sbjct: 668 ACCTTGGTCAGGTGTAAGTTGC 647  
>miR7734-3p Score: 2.0 R03G\_09940  
Query: 1 TGGAACCAGTCCACATTCAACG 22  
||:|||||:|\*|||||||  
Sbjct: 887 ACTTTGGTTAGCTGTAAGTTGC 866  
>miR7734-3p Score: 1.0 R03G\_10039  
Query: 1 TGGAACCAGTCCACATTCAACG 22  
|||||||:|||||||\*|  
Sbjct: 584 ACCTTGGTTAGGTGTAAGTTAC 563  
>miR7734-3p Score: 0.0 R03G\_10217  
Query: 1 TGGAACCAGTCCACATTCAACG 22  
|||||||:|||||||\*|  
Sbjct: 668 ACCTTGGTCAGGTGTAAGTTGC 647  
>miR7734-3p Score: 0.0 R03G\_07980  
Query: 1 TGGAACCAGTCCACATTCAACG 22  
|||||||:|||||||\*|  
Sbjct: 56 ACCTTGGTCAGGTGTAAGTTGC 35  
>miR7734-3p Score: 2.0 R03G\_08042  
Query: 1 TGGAACCAGTCCACATTCAACG 22  
||:|||||:|\*|||||||  
Sbjct: 419 ACTTTGGTTAGCTGTAAGTTGC 398  
>miR7734-3p Score: 0.0 R03G\_06731  
Query: 1 TGGAACCAGTCCACATTCAACG 22  
|||||||:|||||||\*|  
Sbjct: 668 ACCTTGGTCAGGTGTAAGTTGC 647  
>miR7734-3p Score: 2.0 R03G\_07130  
Query: 1 TGGAACCAGTCCACATTCAACG 22



||:|||||:||\*|||||||  
Sbjct: 791 ACTTTGGTTAGCTGTAAGTTGC 770  
>miR7734-3p Score: 2.0 R03G\_07294  
Query: 1 TGGAACCAGTCCACATTCAACG 22  
||:|||||:||\*|||||||  
Sbjct: 488 ACTTTGGTTAGCTGTAAGTTGC 467  
>miR7734-3p Score: 0.0 R03G\_07307  
Query: 1 TGGAACCAGTCCACATTCAACG 22  
|||||||  
Sbjct: 668 ACCTTGGTCAGGTGTAAGTTGC 647  
>miR7734-3p Score: 2.0 R03G\_07686  
Query: 1 TGGAACCAGTCCACATTCAACG 22  
||:|||||:||\*|||||||  
Sbjct: 887 ACTTTGGTTAGCTGTAAGTTGC 866  
>miR7734-3p Score: 2.5 R03G\_07693  
Query: 1 TGGAACCAGTCCACATTCAACG 22  
||:|||||:||\*|||||||\*|  
Sbjct: 749 ACTTTGGTTAGTTGTAAGTTAC 728  
>miR7734-3p Score: 0.0 R03G\_07698  
Query: 1 TGGAACCAGTCCACATTCAACG 22  
|||||||  
Sbjct: 668 ACCTTGGTCAGGTGTAAGTTGC 647  
>miR7734-3p Score: 0.0 R03G\_07721  
Query: 1 TGGAACCAGTCCACATTCAACG 22  
|||||||  
Sbjct: 668 ACCTTGGTCAGGTGTAAGTTGC 647  
>miR7734-3p Score: 0.0 R03G\_07737  
Query: 1 TGGAACCAGTCCACATTCAACG 22  
|||||||  
Sbjct: 29 ACCTTGGTCAGGTGTAAGTTGC 8  
>miR7734-3p Score: 2.0 R03G\_07976  
Query: 1 TGGAACCAGTCCACATTCAACG 22  
||:|||||:||\*|||||||  
Sbjct: 884 ACTTTGGTTAGCTGTAAGTTGC 863  
>miR7734-3p Score: 2.0 R03G\_05631  
Query: 1 TGGAACCAGTCCACATTCAACG 22  
||:|||||:||\*|||||||  
Sbjct: 887 ACTTTGGTTAGCTGTAAGTTGC 866  
>miR7734-3p Score: 2.5 R03G\_05958  
Query: 1 TGGAACCAGTCCACATTCAACG 22  
||:|||||:||\*|||||||\*|  
Sbjct: 851 ACTTTGGTTAGCTGTAAGTTTC 830  
>miR7734-3p Score: 2.5 R03G\_06430  
Query: 1 TGGAACCAGTCCACATTCAACG 22  
||:|||||:||\*|||||||\*|

Sbjct: 851 ACTTTGGTTAGCTGTAAGTTTC 830  
>miR7734-3p Score: 0.0 R03G\_04683  
Query: 1 TGGAACCAGTCCACATTCAACG 22  
|||||

Sbjct: 668 ACCTTGGTCAGGTGTAAGTTGC 647  
>miR7734-3p Score: 2.5 R03G\_04785  
Query: 1 TGGAACCAGTCCACATTCAACG 22  
||:|||||:|\*|||||\*|

Sbjct: 851 ACTTTGGTTAGCTGTAAGTTTC 830  
>miR7734-3p Score: 1.0 R03G\_05424  
Query: 1 TGGAACCAGTCCACATTCAACG 22  
|||||:|||||\*|

Sbjct: 584 ACCTTGGTTAGGTGTAAGTTAC 563  
>miR7734-3p Score: 1.0 R03G\_02828  
Query: 1 TGGAACCAGTCCACATTCAACG 22  
|||||:|||||\*|

Sbjct: 584 ACCTTGGTTAGGTGTAAGTTAC 563  
>miR7734-3p Score: 2.5 R03G\_03555  
Query: 1 TGGAACCAGTCCACATTCAACG 22  
||:|||||:|\*|||||\*|

Sbjct: 887 ACTTTGGTTAGCTGTAAGTTTC 866  
>miR7734-3p Score: 2.0 R03G\_03580  
Query: 1 TGGAACCAGTCCACATTCAACG 22  
||:|||||:|\*|||||

Sbjct: 812 ACTTTGGTTAGCTGTAAGTTGC 791  
>miR7734-3p Score: 2.5 R03G\_03589  
Query: 1 TGGAACCAGTCCACATTCAACG 22  
||:|||||:|\*|||||\*|

Sbjct: 812 ACTTTGGTTAGCTGTAAGTTTC 791  
>miR7734-3p Score: 0.0 R03G\_04212  
Query: 1 TGGAACCAGTCCACATTCAACG 22  
|||||

Sbjct: 668 ACCTTGGTCAGGTGTAAGTTGC 647  
>miR7734-3p Score: 1.0 R03G\_00291  
Query: 1 TGGAACCAGTCCACATTCAACG 22  
|||||:|||||\*|

Sbjct: 584 ACCTTGGTTAGGTGTAAGTTAC 563  
>miR7734-3p Score: 2.0 R03G\_00693  
Query: 1 TGGAACCAGTCCACATTCAACG 22  
||:|||||:|\*|||||

Sbjct: 365 ACTTTGGTTAGCTGTAAGTTGC 344  
>miR7734-3p Score: 2.5 R03G\_01207  
Query: 1 TGGAACCAGTCCACATTCAACG 22  
||:|||||:|\*|||||\*|

Sbjct: 821 ACTTTGGTTAGCTGTAAGTTTC 800

>miR7734-3p Score: 2.5 R03G\_01309  
Query: 1 TGGAACCAGTCCACATTCAACG 22  
||:|||||:|\*|||||||\*|  
Sbjct: 836 ACTTTGGTTAGCTGTAAGTTTC 815

>miR7734-3p Score: 0.0 R03G\_01728  
Query: 1 TGGAACCAGTCCACATTCAACG 22  
|||||||  
Sbjct: 626 ACCTTGGTCAGGTGTAAGTTGC 605

>miR7734-3p Score: 2.5 R03G\_01740  
Query: 1 TGGAACCAGTCCACATTCAACG 22  
||:|||||:|\*|||||||\*|  
Sbjct: 851 ACTTTGGTTAGCTGTAAGTTTC 830

>miR7734-3p Score: 2.0 R03G\_17441  
Query: 1 TGGAACCAGTCCACATTCAACG 22  
||:|||||:|\*|||||||  
Sbjct: 614 ACTTTGGTTAGCTGTAAGTTGC 593

>miR7734-3p Score: 2.0 R03G\_17385  
Query: 1 TGGAACCAGTCCACATTCAACG 22  
||:|||||:|\*|||||||  
Sbjct: 887 ACTTTGGTTAGCTGTAAGTTGC 866

>miR7734-3p Score: 2.0 R03G\_17358  
Query: 1 TGGAACCAGTCCACATTCAACG 22  
||:|||||:|\*|||||||  
Sbjct: 887 ACTTTGGTTAGCTGTAAGTTGC 866

>miR6477 Score: 2.5 R03G\_17265  
Query: 1 TGAACAGTAGAGGATGAT 18  
\*|||||:|\*|||||||  
Sbjct: 101 CCTTGTTGTCACCTACTA 84

>miR6477 Score: 2.5 R03G\_17244  
Query: 1 TGAACAGTAGAGGATGAT 18  
\*|||||:|\*|||||||  
Sbjct: 101 CCTTGTTGTCACCTACTA 84

>miR6477 Score: 2.5 R03G\_17210  
Query: 1 TGAACAGTAGAGGATGAT 18  
\*|||||:|\*|||||||  
Sbjct: 101 CCTTGTTGTCACCTACTA 84

>miR6477 Score: 0.0 R03G\_17215  
Query: 1 TGAACAGTAGAGGATGAT 18  
|||||||  
Sbjct: 110 ACTTGTCATCTCCTACTA 93

>miR6477 Score: 0.0 R03G\_16897  
Query: 1 TGAACAGTAGAGGATGAT 18  
|||||||  
Sbjct: 110 ACTTGTCATCTCCTACTA 93

>miR6477 Score: 2.5 R03G\_16743

Query: 1 TGAACAGTAGAGGATGAT 18  
\*|||||:|\*|||||  
Sbjct: 101 CCTTGTTGTCACCTACTA 84  
>miR6477 Score: 2.5 R03G\_16748  
Query: 1 TGAACAGTAGAGGATGAT 18  
\*|||||:|\*|||||  
Sbjct: 101 CCTTGTTGTCACCTACTA 84  
>miR6477 Score: 0.0 R03G\_16807  
Query: 1 TGAACAGTAGAGGATGAT 18  
|||||||  
Sbjct: 110 ACTTGTCATCTCCTACTA 93  
>miR6477 Score: 2.5 R03G\_16369  
Query: 1 TGAACAGTAGAGGATGAT 18  
\*|||||:|\*|||||  
Sbjct: 101 CCTTGTTGTCACCTACTA 84  
>miR6477 Score: 2.2 R03G\_16436  
Query: 1 TGAACAGTAGAGGATGAT 18  
::|||||:||||:|:|  
Sbjct: 444 GTTTGTTCGTCTCTTATTA 427  
>miR6477 Score: 2.0 R03G\_16482  
Query: 1 TGAACAGTAGAGGATGAT 18  
||\*|\*|||||||  
Sbjct: 122 ACATTTTCATCTCCTACTA 105  
>miR6477 Score: 1.0 R03G\_16551  
Query: 1 TGAACAGTAGAGGATGAT 18  
|||||||\*|||||||  
Sbjct: 110 ACTTGTCACCTCCTACTA 93  
>miR6477 Score: 1.0 R03G\_16555  
Query: 1 TGAACAGTAGAGGATGAT 18  
|||||||\*|||||||  
Sbjct: 110 ACTTGTCACCTCCTACTA 93  
>miR6477 Score: 2.5 R03G\_15879  
Query: 1 TGAACAGTAGAGGATGAT 18  
\*|||||:|\*|||||  
Sbjct: 101 CCTTGTTGTCACCTACTA 84  
>miR6477 Score: 2.5 R03G\_15897  
Query: 1 TGAACAGTAGAGGATGAT 18  
\*|||||:|\*|||||  
Sbjct: 101 CCTTGTTGTCACCTACTA 84  
>miR6477 Score: 1.5 R03G\_16099  
Query: 1 TGAACAGTAGAGGATGAT 18  
||\*|||||||:|||||  
Sbjct: 764 ACTAGTCATCTTCTACTA 747  
>miR6477 Score: 0.0 R03G\_15675  
Query: 1 TGAACAGTAGAGGATGAT 18

|||||  
Sbjct: 110 ACTTGTCATCTCCTACTA 93  
>miR6477 Score: 2.5 R03G\_14963  
Query: 1 TGAACAGTAGAGGATGAT 18  
\*|||||\*\*|||||  
Sbjct: 615 CCTTGTCATCAACTACTA 598  
>miR6477 Score: 0.0 R03G\_14359  
Query: 1 TGAACAGTAGAGGATGAT 18  
|||||  
Sbjct: 110 ACTTGTCATCTCCTACTA 93  
>miR6477 Score: 2.5 R03G\_14551  
Query: 1 TGAACAGTAGAGGATGAT 18  
\*||||:|\*|||||  
Sbjct: 101 CCTTGTTGTCACCTACTA 84  
>miR6477 Score: 2.5 R03G\_14553  
Query: 1 TGAACAGTAGAGGATGAT 18  
\*||||:|\*|||||  
Sbjct: 101 CCTTGTTGTCACCTACTA 84  
>miR6477 Score: 2.5 R03G\_14690  
Query: 1 TGAACAGTAGAGGATGAT 18  
\*|\*|||||\*|||||  
Sbjct: 122 CCATGTCATCACCTACTA 105  
>miR6477 Score: 2.5 R03G\_14091  
Query: 1 TGAACAGTAGAGGATGAT 18  
\*|||||||:||||:|\*|  
Sbjct: 192 CCTTGTCATTTCTGCCA 175  
>miR6477 Score: 2.5 R03G\_13452  
Query: 1 TGAACAGTAGAGGATGAT 18  
\*||||:|\*|||||  
Sbjct: 101 CCTTGTTGTCACCTACTA 84  
>miR6477 Score: 1.0 R03G\_13726  
Query: 1 TGAACAGTAGAGGATGAT 18  
||||||\*|||||  
Sbjct: 110 ACTTGTCACCTCCTACTA 93  
>miR6477 Score: 1.0 R03G\_13742  
Query: 1 TGAACAGTAGAGGATGAT 18  
||||||\*|||||  
Sbjct: 110 ACTTGTCACCTCCTACTA 93  
>miR6477 Score: 1.0 R03G\_13848  
Query: 1 TGAACAGTAGAGGATGAT 18  
||||||\*|||||  
Sbjct: 110 ACTTGTCACCTCCTACTA 93  
>miR6477 Score: 2.5 R03G\_12976  
Query: 1 TGAACAGTAGAGGATGAT 18  
\*||||:|\*|||||

Sbjct: 101 CCTTGTTGTCACCTACTA 84  
>miR6477 Score: 0.2 R03G\_13151  
Query: 1 TGAACAGTAGAGGATGAT 18  
|||||||:|||||||  
Sbjct: 110 ACTTGTCATCTCCTACTG 93  
>miR6477 Score: 2.5 R03G\_13272  
Query: 1 TGAACAGTAGAGGATGAT 18  
\*|||||:|\*|||||||  
Sbjct: 101 CCTTGTTGTCACCTACTA 84  
>miR6477 Score: 2.5 R03G\_11977  
Query: 1 TGAACAGTAGAGGATGAT 18  
\*|||||:|\*|||||||  
Sbjct: 101 CCTTGTTGTCACCTACTA 84  
>miR6477 Score: 2.5 R03G\_12011  
Query: 1 TGAACAGTAGAGGATGAT 18  
\*|||||:|\*|||||||  
Sbjct: 101 CCTTGTTGTCACCTACTA 84  
>miR6477 Score: 2.5 R03G\_11236  
Query: 1 TGAACAGTAGAGGATGAT 18  
\*|||||:|\*|||||||  
Sbjct: 101 CCTTGTTGTCACCTACTA 84  
>miR6477 Score: 1.0 R03G\_11401  
Query: 1 TGAACAGTAGAGGATGAT 18  
|||||||\*|||||||  
Sbjct: 110 ACTTGTCACCTCCTACTA 93  
>miR6477 Score: 2.5 R03G\_11537  
Query: 1 TGAACAGTAGAGGATGAT 18  
\*|||||:|\*|||||||  
Sbjct: 101 CCTTGTTGTCACCTACTA 84  
>miR6477 Score: 2.5 R03G\_11543  
Query: 1 TGAACAGTAGAGGATGAT 18  
\*|||||:|\*|||||||  
Sbjct: 101 CCTTGTTGTCACCTACTA 84  
>miR6477 Score: 2.5 R03G\_11651  
Query: 1 TGAACAGTAGAGGATGAT 18  
:|||||\*|||:||:|:  
Sbjct: 3200 GCTTGTCTTCTTCTGCTG 3183  
>miR6477 Score: 1.0 R03G\_11773  
Query: 1 TGAACAGTAGAGGATGAT 18  
|||||||\*|||||||  
Sbjct: 110 ACTTGTCACCTCCTACTA 93  
>miR6477 Score: 0.0 R03G\_10235  
Query: 1 TGAACAGTAGAGGATGAT 18  
|||||||:|||||||  
Sbjct: 110 ACTTGTCATCTCCTACTA 93

>miR6477 Score: 0.0 R03G\_10732  
Query: 1 TGAACAGTAGAGGATGAT 18  
|||||  
Sbjct: 110 ACTTGTCATCTCCTACTA 93

>miR6477 Score: 0.0 R03G\_09483  
Query: 1 TGAACAGTAGAGGATGAT 18  
|||||  
Sbjct: 110 ACTTGTCATCTCCTACTA 93

>miR6477 Score: 0.0 R03G\_09499  
Query: 1 TGAACAGTAGAGGATGAT 18  
|||||  
Sbjct: 110 ACTTGTCATCTCCTACTA 93

>miR6477 Score: 0.0 R03G\_09544  
Query: 1 TGAACAGTAGAGGATGAT 18  
|||||  
Sbjct: 110 ACTTGTCATCTCCTACTA 93

>miR6477 Score: 2.5 R03G\_09602  
Query: 1 TGAACAGTAGAGGATGAT 18  
\*|||||:|\*|||||  
Sbjct: 101 CCTTGTTGTCACCTACTA 84

>miR6477 Score: 2.5 R03G\_09603  
Query: 1 TGAACAGTAGAGGATGAT 18  
\*|||||:|\*|||||  
Sbjct: 101 CCTTGTTGTCACCTACTA 84

>miR6477 Score: 1.0 R03G\_09607  
Query: 1 TGAACAGTAGAGGATGAT 18  
||||||\*|||||  
Sbjct: 110 ACTTGTCACCTCCTACTA 93

>miR6477 Score: 2.5 R03G\_09842  
Query: 1 TGAACAGTAGAGGATGAT 18  
|||||:||||:|\*|||\*  
Sbjct: 2078 ACTTGTTATCTTCAACTT 2061

>miR6477 Score: 2.5 R03G\_09929  
Query: 1 TGAACAGTAGAGGATGAT 18  
\*|||||:|\*|||||  
Sbjct: 101 CCTTGTTGTCACCTACTA 84

>miR6477 Score: 2.5 R03G\_10043  
Query: 1 TGAACAGTAGAGGATGAT 18  
\*|||||:|\*|||||  
Sbjct: 101 CCTTGTTGTCACCTACTA 84

>miR6477 Score: 2.5 R03G\_10218  
Query: 1 TGAACAGTAGAGGATGAT 18  
\*|||||:|\*|||||  
Sbjct: 101 CCTTGTTGTCACCTACTA 84

>miR6477 Score: 2.5 R03G\_07981

Query: 1 TGAACAGTAGAGGATGAT 18  
\*|||||:|\*|||||  
Sbjct: 101 CCTTGTTGTCACCTACTA 84  
>miR6477 Score: 2.2 R03G\_08245  
Query: 1 TGAACAGTAGAGGATGAT 18  
::|||||:|:|:|||||  
Sbjct: 444 GTTTGTCGTTTCTTACTA 427  
>miR6477 Score: 1.5 R03G\_08661  
Query: 1 TGAACAGTAGAGGATGAT 18  
|:|||||\*|||||  
Sbjct: 110 ATTTGTCACCTCCTACTA 93  
>miR6477 Score: 1.0 R03G\_08846  
Query: 1 TGAACAGTAGAGGATGAT 18  
||||||\*|||||  
Sbjct: 110 ACTTGTCACCTCCTACTA 93  
>miR6477 Score: 2.0 R03G\_08852  
Query: 1 TGAACAGTAGAGGATGAT 18  
\*|||||:|||||:|\*  
Sbjct: 578 CCTTGTCGTCTCCTGCTC 561  
>miR6477 Score: 2.5 R03G\_06730  
Query: 1 TGAACAGTAGAGGATGAT 18  
\*|||||:|\*|||||  
Sbjct: 101 CCTTGTTGTCACCTACTA 84  
>miR6477 Score: 2.5 R03G\_06990  
Query: 1 TGAACAGTAGAGGATGAT 18  
\*|||||:|\*|||:|  
Sbjct: 101 CCTTGTCGTCACCTGCTA 84  
>miR6477 Score: 1.0 R03G\_07210  
Query: 1 TGAACAGTAGAGGATGAT 18  
|||||||:|  
Sbjct: 920 ACTTGTCATCTCCTGTTA 903  
>miR6477 Score: 0.0 R03G\_07303  
Query: 1 TGAACAGTAGAGGATGAT 18  
|||||||:|  
Sbjct: 110 ACTTGTCATCTCCTACTA 93  
>miR6477 Score: 2.5 R03G\_07306  
Query: 1 TGAACAGTAGAGGATGAT 18  
\*|||||:|\*|||||  
Sbjct: 101 CCTTGTTGTCACCTACTA 84  
>miR6477 Score: 2.5 R03G\_07696  
Query: 1 TGAACAGTAGAGGATGAT 18  
\*|||||:|\*|||||  
Sbjct: 101 CCTTGTTGTCACCTACTA 84  
>miR6477 Score: 1.0 R03G\_07704  
Query: 1 TGAACAGTAGAGGATGAT 18



|||||||\*|||||||  
Sbjct: 110 ACTTGTCACCTCCTACTA 93  
>miR6477 Score: 2.5 R03G\_07720  
Query: 1 TGAACAGTAGAGGATGAT 18  
\*|||||:|\*|||||||  
Sbjct: 101 CCTTGTTGTCACCTACTA 84  
>miR6477 Score: 2.5 R03G\_07738  
Query: 1 TGAACAGTAGAGGATGAT 18  
\*|||||:|\*|||||||  
Sbjct: 101 CCTTGTTGTCACCTACTA 84  
>miR6477 Score: 0.0 R03G\_07875  
Query: 1 TGAACAGTAGAGGATGAT 18  
|||||||  
Sbjct: 110 ACTTGTCATCTCCTACTA 93  
>miR6477 Score: 1.0 R03G\_05622  
Query: 1 TGAACAGTAGAGGATGAT 18  
|||||||\*|||||||  
Sbjct: 110 ACTTGTCACCTCCTACTA 93  
>miR6477 Score: 0.0 R03G\_05635  
Query: 1 TGAACAGTAGAGGATGAT 18  
|||||||  
Sbjct: 110 ACTTGTCATCTCCTACTA 93  
>miR6477 Score: 2.5 R03G\_05906  
Query: 1 TGAACAGTAGAGGATGAT 18  
\*|||||:|\*|||||||  
Sbjct: 101 CCTTGTTGTCACCTACTA 84  
>miR6477 Score: 1.0 R03G\_05915  
Query: 1 TGAACAGTAGAGGATGAT 18  
|\*|||||  
Sbjct: 110 ACGTGTCATCTCCTACTA 93  
>miR6477 Score: 2.2 R03G\_06138  
Query: 1 TGAACAGTAGAGGATGAT 18  
|:|\*|||||:||||:  
Sbjct: 531 ATTTTTCATCTCTTACTG 514  
>miR6477 Score: 0.0 R03G\_06423  
Query: 1 TGAACAGTAGAGGATGAT 18  
|||||||  
Sbjct: 110 ACTTGTCATCTCCTACTA 93  
>miR6477 Score: 0.0 R03G\_06441  
Query: 1 TGAACAGTAGAGGATGAT 18  
|||||||  
Sbjct: 110 ACTTGTCATCTCCTACTA 93  
>miR6477 Score: 2.2 R03G\_06479  
Query: 1 TGAACAGTAGAGGATGAT 18  
:|||||:|\*||:|

Sbjct: 4058 GCTTGTCGTCTGCTGCTA 4041  
>miR6477 Score: 1.8 R03G\_04535  
Query: 1 TGAACAGTAGAGGATGAT 18  
:||||\*|||||||\*  
Sbjct: 2036 GCTTATCATCTCCTACTC 2019  
>miR6477 Score: 2.5 R03G\_04659  
Query: 1 TGAACAGTAGAGGATGAT 18  
\*|||||:|\*|||||  
Sbjct: 62 CCTTGTTGTCACCTACTA 45  
>miR6477 Score: 2.5 R03G\_05171  
Query: 1 TGAACAGTAGAGGATGAT 18  
|||||:||||\*|||:|\*  
Sbjct: 749 ACTTGTTATCGCCTATTC 732  
>miR6477 Score: 0.0 R03G\_05336  
Query: 1 TGAACAGTAGAGGATGAT 18  
|||||||  
Sbjct: 110 ACTTGTCATCTCCTACTA 93  
>miR6477 Score: 2.5 R03G\_05347  
Query: 1 TGAACAGTAGAGGATGAT 18  
\*|||||:|\*|||||  
Sbjct: 101 CCTTGTTGTCACCTACTA 84  
>miR6477 Score: 2.5 R03G\_02228  
Query: 1 TGAACAGTAGAGGATGAT 18  
\*|||||:|\*|||||  
Sbjct: 101 CCTTGTTGTCACCTACTA 84  
>miR6477 Score: 2.5 R03G\_02407  
Query: 1 TGAACAGTAGAGGATGAT 18  
||||\*|||:||||\*|  
Sbjct: 417 ACTTGCCATTTCTAC-A 401  
>miR6477 Score: 0.0 R03G\_02689  
Query: 1 TGAACAGTAGAGGATGAT 18  
|||||||  
Sbjct: 110 ACTTGTCATCTCCTACTA 93  
>miR6477 Score: 2.5 R03G\_02817  
Query: 1 TGAACAGTAGAGGATGAT 18  
\*|||||:|\*|||||  
Sbjct: 101 CCTTGTTGTCACCTACTA 84  
>miR6477 Score: 0.0 R03G\_03109  
Query: 1 TGAACAGTAGAGGATGAT 18  
|||||||  
Sbjct: 110 ACTTGTCATCTCCTACTA 93  
>miR6477 Score: 1.0 R03G\_03571  
Query: 1 TGAACAGTAGAGGATGAT 18  
||\*|||||||  
Sbjct: 110 ACATGTCATCTCCTACTA 93

>miR6477 Score: 0.0 R03G\_03615  
Query: 1 TGAACAGTAGAGGATGAT 18  
|||||  
Sbjct: 110 ACTTGTCATCTCCTACTA 93

>miR6477 Score: 2.5 R03G\_04211  
Query: 1 TGAACAGTAGAGGATGAT 18  
\*|||||:|\*|||||  
Sbjct: 101 CCTTGTTGTCACCTACTA 84

>miR6477 Score: 2.5 R03G\_00513  
Query: 1 TGAACAGTAGAGGATGAT 18  
:|||||:||||\*|:  
Sbjct: 5609 GCTTGTCATTTCTCTTG 5592

>miR6477 Score: 0.0 R03G\_00681  
Query: 1 TGAACAGTAGAGGATGAT 18  
|||||  
Sbjct: 110 ACTTGTCATCTCCTACTA 93

>miR6477 Score: 1.0 R03G\_00999  
Query: 1 TGAACAGTAGAGGATGAT 18  
|||||:|  
Sbjct: 1952 ACTTGTCATCTCCTGTTA 1935

>miR6477 Score: 2.5 R03G\_01108  
Query: 1 TGAACAGTAGAGGATGAT 18  
\*|\*|||:|||||\*  
Sbjct: 377 CCATGTCGTCTCCTACTT 360

>miR6477 Score: 2.5 R03G\_01192  
Query: 1 TGAACAGTAGAGGATGAT 18  
\*|||||:|\*|||||  
Sbjct: 101 CCTTGTTGTCACCTACTA 84

>miR6477 Score: 0.0 R03G\_01322  
Query: 1 TGAACAGTAGAGGATGAT 18  
|||||  
Sbjct: 110 ACTTGTCATCTCCTACTA 93

>miR6477 Score: 1.0 R03G\_01612  
Query: 1 TGAACAGTAGAGGATGAT 18  
||||||\*|||||  
Sbjct: 110 ACTTGTCACCTCCTACTA 93

>miR6477 Score: 0.0 R03G\_01652  
Query: 1 TGAACAGTAGAGGATGAT 18  
|||||  
Sbjct: 110 ACTTGTCATCTCCTACTA 93

>miR6477 Score: 2.5 R03G\_01717  
Query: 1 TGAACAGTAGAGGATGAT 18  
\*|||||:|\*|||||  
Sbjct: 101 CCTTGTTGTCACCTACTA 84

>miR6477 Score: 2.5 R03G\_01726

Query: 1 TGAACAGTAGAGGATGAT 18  
\*|||||:|\*|||||  
Sbjct: 101 CCTTGTTGTCACCTACTA 84  
>miR6477 Score: 1.0 R03G\_01730  
Query: 1 TGAACAGTAGAGGATGAT 18  
||\*|||||  
Sbjct: 110 ACGTGTCATCTCCTACTA 93  
>miR6477 Score: 2.5 R03G\_01780  
Query: 1 TGAACAGTAGAGGATGAT 18  
\*|||\*|||:|||||\*  
Sbjct: 696 CCTTTTCATTTCTACTC 679  
>miR6477 Score: 1.8 R03G\_01902  
Query: 1 TGAACAGTAGAGGATGAT 18  
|||||||:|\*||:  
Sbjct: 371 ACTTGTCATCTTCTTCTG 354  
>miR6477 Score: 0.0 R03G\_01956  
Query: 1 TGAACAGTAGAGGATGAT 18  
|||||||  
Sbjct: 110 ACTTGTCATCTCCTACTA 93  
>miR6477 Score: 2.5 R03G\_17460  
Query: 1 TGAACAGTAGAGGATGAT 18  
\*|||||:|\*|||||  
Sbjct: 101 CCTTGTTGTCACCTACTA 84  
>miR6477 Score: 2.5 R03G\_17433  
Query: 1 TGAACAGTAGAGGATGAT 18  
\*|||||:|\*|||||  
Sbjct: 101 CCTTGTTGTCACCTACTA 84  
>miR6477 Score: 0.0 R03G\_17382  
Query: 1 TGAACAGTAGAGGATGAT 18  
|||||||  
Sbjct: 110 ACTTGTCATCTCCTACTA 93  
>miR6477 Score: 0.0 R03G\_17285  
Query: 1 TGAACAGTAGAGGATGAT 18  
|||||||  
Sbjct: 110 ACTTGTCATCTCCTACTA 93  
>miR3476-5p Score: 0.5 R03G\_17256  
Query: 1 TGAAGGGTGCTGCTGCTGC 21  
|||||||:|||||||  
Sbjct: 374 ACTTGACCTACGACGACGACG 354  
>miR3476-5p Score: 0.5 R03G\_17248  
Query: 1 TGAAGGGTGCTGCTGCTGC 21  
|||||||:|||||||  
Sbjct: 377 ACTTGACCTACGACGACGACG 357  
>miR3476-5p Score: 0.0 R03G\_16748  
Query: 1 TGAAGGGTGCTGCTGCTGC 21

|||||  
Sbjct: 347 ACTTGACCCACGACGACGACG 327  
>miR3476-5p Score: 0.5 R03G\_16137  
Query: 1 TGAAGTGGGTGCTGCTGCTGC 21  
|||||:|||||  
Sbjct: 371 ACTTGACCTACGACGACGACG 351  
>miR3476-5p Score: 0.5 R03G\_15890  
Query: 1 TGAAGTGGGTGCTGCTGCTGC 21  
|||||:|||||  
Sbjct: 377 ACTTGACCTACGACGACGACG 357  
>miR3476-5p Score: 0.0 R03G\_15897  
Query: 1 TGAAGTGGGTGCTGCTGCTGC 21  
|||||:|||||  
Sbjct: 347 ACTTGACCCACGACGACGACG 327  
>miR3476-5p Score: 0.5 R03G\_15147  
Query: 1 TGAAGTGGGTGCTGCTGCTGC 21  
|||||:|||||  
Sbjct: 341 ACTTGACCTACGACGACGACG 321  
>miR3476-5p Score: 0.0 R03G\_14551  
Query: 1 TGAAGTGGGTGCTGCTGCTGC 21  
|||||:|||||  
Sbjct: 347 ACTTGACCCACGACGACGACG 327  
>miR3476-5p Score: 2.5 R03G\_13627  
Query: 1 TGAAGTGGGTGCTGCTGCTGC 21  
:|\*|||||:||\*:  
Sbjct: 393 GCCTGACCCACGATGACCGCG 373  
>miR3476-5p Score: 0.5 R03G\_13146  
Query: 1 TGAAGTGGGTGCTGCTGCTGC 21  
|||||:|||||  
Sbjct: 377 ACTTGACCTACGACGACGACG 357  
>miR3476-5p Score: 0.0 R03G\_11977  
Query: 1 TGAAGTGGGTGCTGCTGCTGC 21  
|||||:|||||  
Sbjct: 311 ACTTGACCCACGACGACGACG 291  
>miR3476-5p Score: 0.0 R03G\_11236  
Query: 1 TGAAGTGGGTGCTGCTGCTGC 21  
|||||:|||||  
Sbjct: 389 ACTTGACCCACGACGACGACG 369  
>miR3476-5p Score: 0.0 R03G\_11537  
Query: 1 TGAAGTGGGTGCTGCTGCTGC 21  
|||||:|||||  
Sbjct: 389 ACTTGACCCACGACGACGACG 369  
>miR3476-5p Score: 2.5 R03G\_10502  
Query: 1 TGAAGTGGGTGCTGCTGCTGC 21  
|||\*:::|||||

Sbjct: 231 ACTTTGTTACGACGACGACG 211  
>miR3476-5p Score: 2.0 R03G\_10775  
Query: 1 TGAAGGGTGCTGCTGCTGC 21  
|||||||:||||\*||\*|||  
Sbjct: 375 ACTTGACCTACGAAGACAACG 355  
>miR3476-5p Score: 1.0 R03G\_09497  
Query: 1 TGAAGGGTGCTGCTGCTGC 21  
|||||||:|||||||\*|||  
Sbjct: 86 ACTTGACCTACGACGACAACG 66  
>miR3476-5p Score: 0.0 R03G\_09602  
Query: 1 TGAAGGGTGCTGCTGCTGC 21  
|||||||  
Sbjct: 347 ACTTGACCCACGACGACGACG 327  
>miR3476-5p Score: 0.0 R03G\_09603  
Query: 1 TGAAGGGTGCTGCTGCTGC 21  
|||||||  
Sbjct: 389 ACTTGACCCACGACGACGACG 369  
>miR3476-5p Score: 0.0 R03G\_09929  
Query: 1 TGAAGGGTGCTGCTGCTGC 21  
|||||||  
Sbjct: 347 ACTTGACCCACGACGACGACG 327  
>miR3476-5p Score: 0.5 R03G\_10041  
Query: 1 TGAAGGGTGCTGCTGCTGC 21  
|||||||:|||||||  
Sbjct: 377 ACTTGACCTACGACGACGACG 357  
>miR3476-5p Score: 0.0 R03G\_10218  
Query: 1 TGAAGGGTGCTGCTGCTGC 21  
|||||||  
Sbjct: 368 ACTTGACCCACGACGACGACG 348  
>miR3476-5p Score: 0.0 R03G\_07981  
Query: 1 TGAAGGGTGCTGCTGCTGC 21  
|||||||  
Sbjct: 347 ACTTGACCCACGACGACGACG 327  
>miR3476-5p Score: 0.5 R03G\_09182  
Query: 1 TGAAGGGTGCTGCTGCTGC 21  
|||||||:|||||||  
Sbjct: 353 ACTTGACCTACGACGACGACG 333  
>miR3476-5p Score: 0.0 R03G\_06730  
Query: 1 TGAAGGGTGCTGCTGCTGC 21  
|||||||  
Sbjct: 347 ACTTGACCCACGACGACGACG 327  
>miR3476-5p Score: 0.0 R03G\_07306  
Query: 1 TGAAGGGTGCTGCTGCTGC 21  
|||||||  
Sbjct: 347 ACTTGACCCACGACGACGACG 327

>miR3476-5p Score: 0.0 R03G\_07696  
Query: 1 TGAAGTGGGTGCTGCTGCTGC 21  
|||||  
Sbjct: 347 ACTTGACCCACGACGACGACG 327

>miR3476-5p Score: 0.0 R03G\_07720  
Query: 1 TGAAGTGGGTGCTGCTGCTGC 21  
|||||  
Sbjct: 347 ACTTGACCCACGACGACGACG 327

>miR3476-5p Score: 0.0 R03G\_07738  
Query: 1 TGAAGTGGGTGCTGCTGCTGC 21  
|||||  
Sbjct: 398 ACTTGACCCACGACGACGACG 378

>miR3476-5p Score: 0.0 R03G\_04679  
Query: 1 TGAAGTGGGTGCTGCTGCTGC 21  
|||||  
Sbjct: 317 ACTTGACCCACGACGACGACG 297

>miR3476-5p Score: 1.5 R03G\_05425  
Query: 1 TGAAGTGGGTGCTGCTGCTGC 21  
|||||:||||\*|||||  
Sbjct: 374 ACTTGACCTACGAAGACGACG 354

>miR3476-5p Score: 0.0 R03G\_02228  
Query: 1 TGAAGTGGGTGCTGCTGCTGC 21  
|||||  
Sbjct: 347 ACTTGACCCACGACGACGACG 327

>miR3476-5p Score: 2.5 R03G\_03439  
Query: 1 TGAAGTGGGTGCTGCTGCTGC 21  
|||||:||||\*||\*\*  
Sbjct: 537 ACTTGACCCATGACGAAGAAA 517

>miR3476-5p Score: 0.5 R03G\_03584  
Query: 1 TGAAGTGGGTGCTGCTGCTGC 21  
|||||:|||||  
Sbjct: 305 ACTTGACCTACGACGACGACG 285

>miR3476-5p Score: 2.2 R03G\_03734  
Query: 1 TGAAGTGGGTGCTGCTGCTGC 21  
||\*|||||:||||:\*\nSbjct: 286 ACTAGACCCACGATGACGGGG 266

>miR3476-5p Score: 0.0 R03G\_04211  
Query: 1 TGAAGTGGGTGCTGCTGCTGC 21  
|||||  
Sbjct: 347 ACTTGACCCACGACGACGACG 327

>miR3476-5p Score: 0.5 R03G\_00288  
Query: 1 TGAAGTGGGTGCTGCTGCTGC 21  
|||||:|||||  
Sbjct: 368 ACTTGACCTACGACGACGACG 348

>miR3476-5p Score: 0.0 R03G\_01726

Query: 1 TGAAGTGGGTGCTGCTGCTGC 21  
|||||  
Sbjct: 392 ACTTGACCCACGACGACGACG 372  
>miR3476-5p Score: 0.5 R03G\_17350  
Query: 1 TGAAGTGGGTGCTGCTGCTGC 21  
|||||:|||||  
Sbjct: 371 ACTTGACCTACGACGACGACG 351  
>miR8571 Score: 0.0 R03G\_16560  
Query: 1 TTCATCGTCAAGATCCTGTTCT 22  
|||||  
Sbjct: 534 AAGTAGCAGTTCTAGGACAAGA 513  
>miR8571 Score: 0.0 R03G\_16557  
Query: 1 TTCATCGTCAAGATCCTGTTCT 22  
|||||  
Sbjct: 1464 AAGTAGCAGTTCTAGGACAAGA 1443  
>miR8571 Score: 0.0 R03G\_16132  
Query: 1 TTCATCGTCAAGATCCTGTTCT 22  
|||||  
Sbjct: 1464 AAGTAGCAGTTCTAGGACAAGA 1443  
>miR8571 Score: 2.5 R03G\_14835  
Query: 1 TTCATCGTCAAGATCCTGTTCT 22  
\*|||||\*|||||\*|\*|  
Sbjct: 459 TAGTAGCAGTTGTAGGACTA-A 439  
>miR8571 Score: 1.5 R03G\_14926  
Query: 1 TTCATCGTCAAGATCCTGTTCT 22  
|||||:|||||\*|||||  
Sbjct: 51 AAGTAGTAGTTTTAGGA-AAGA 31  
>miR8571 Score: 0.0 R03G\_14995  
Query: 1 TTCATCGTCAAGATCCTGTTCT 22  
|||||  
Sbjct: 1464 AAGTAGCAGTTCTAGGACAAGA 1443  
>miR8571 Score: 0.0 R03G\_15134  
Query: 1 TTCATCGTCAAGATCCTGTTCT 22  
|||||  
Sbjct: 1506 AAGTAGCAGTTCTAGGACAAGA 1485  
>miR8571 Score: 2.5 R03G\_13437  
Query: 1 TTCATCGTCAAGATCCTGTTCT 22  
|||||\*|||||:||||\*|\*|  
Sbjct: 231 AAGTAGAAGTTCTGGGACTAAA 210  
>miR8571 Score: 0.0 R03G\_12470  
Query: 1 TTCATCGTCAAGATCCTGTTCT 22  
|||||  
Sbjct: 1464 AAGTAGCAGTTCTAGGACAAGA 1443  
>miR8571 Score: 0.0 R03G\_11524  
Query: 1 TTCATCGTCAAGATCCTGTTCT 22



|||||  
Sbjct: 531 AAGTAGCAGTTCTAGGACAAGA 510  
>miR8571 Score: 0.0 R03G\_09540  
Query: 1 TTCATCGTCAAGATCCTGTTCT 22  
|||||  
Sbjct: 672 AAGTAGCAGTTCTAGGACAAGA 651  
>miR8571 Score: 0.0 R03G\_07098  
Query: 1 TTCATCGTCAAGATCCTGTTCT 22  
|||||  
Sbjct: 1464 AAGTAGCAGTTCTAGGACAAGA 1443  
>miR8571 Score: 0.0 R03G\_06442  
Query: 1 TTCATCGTCAAGATCCTGTTCT 22  
|||||  
Sbjct: 7188 AAGTAGCAGTTCTAGGACAAGA 7167  
>miR8571 Score: 0.0 R03G\_05271  
Query: 1 TTCATCGTCAAGATCCTGTTCT 22  
|||||  
Sbjct: 1464 AAGTAGCAGTTCTAGGACAAGA 1443  
>miR8571 Score: 0.0 R03G\_02699  
Query: 1 TTCATCGTCAAGATCCTGTTCT 22  
|||||  
Sbjct: 261 AAGTAGCAGTTCTAGGACAAGA 240  
>miR8571 Score: 0.0 R03G\_03098  
Query: 1 TTCATCGTCAAGATCCTGTTCT 22  
|||||  
Sbjct: 672 AAGTAGCAGTTCTAGGACAAGA 651  
>miR8571 Score: 0.0 R03G\_00290  
Query: 1 TTCATCGTCAAGATCCTGTTCT 22  
|||||  
Sbjct: 1464 AAGTAGCAGTTCTAGGACAAGA 1443  
>miR8571 Score: 0.0 R03G\_00486  
Query: 1 TTCATCGTCAAGATCCTGTTCT 22  
|||||  
Sbjct: 261 AAGTAGCAGTTCTAGGACAAGA 240  
>miR8571 Score: 0.0 R03G\_01745  
Query: 1 TTCATCGTCAAGATCCTGTTCT 22  
|||||  
Sbjct: 1464 AAGTAGCAGTTCTAGGACAAGA 1443  
>miR8571 Score: 0.0 R03G\_01928  
Query: 1 TTCATCGTCAAGATCCTGTTCT 22  
|||||  
Sbjct: 1464 AAGTAGCAGTTCTAGGACAAGA 1443  
>miR8571 Score: 0.0 R03G\_17438  
Query: 1 TTCATCGTCAAGATCCTGTTCT 22  
|||||

Sbjct: 996 AAGTAGCAGTTCTAGGACAAGA 975  
>miR7719-5p Score: 0.5 R03G\_17249  
Query: 1 TCCTCCATAAGCATGTTTCTTC 22  
|||||\*  
Sbjct: 546 AGGAGGTATTCGTACAAAGAAA 525  
>miR7719-5p Score: 0.0 R03G\_14979  
Query: 1 TCCTCCATAAGCATGTTTCTTC 22  
|||||  
Sbjct: 546 AGGAGGTATTCGTACAAAGAAG 525  
>miR7719-5p Score: 0.0 R03G\_14363  
Query: 1 TCCTCCATAAGCATGTTTCTTC 22  
|||||  
Sbjct: 504 AGGAGGTATTCGTACAAAGAAG 483  
>miR7719-5p Score: 0.5 R03G\_13741  
Query: 1 TCCTCCATAAGCATGTTTCTTC 22  
|||||:|||||  
Sbjct: 546 AGGAGGTATTCGTGCAAAGAAG 525  
>miR7719-5p Score: 0.0 R03G\_13755  
Query: 1 TCCTCCATAAGCATGTTTCTTC 22  
|||||  
Sbjct: 546 AGGAGGTATTCGTACAAAGAAG 525  
>miR7719-5p Score: 0.0 R03G\_13863  
Query: 1 TCCTCCATAAGCATGTTTCTTC 22  
|||||  
Sbjct: 246 AGGAGGTATTCGTACAAAGAAG 225  
>miR7719-5p Score: 0.0 R03G\_13270  
Query: 1 TCCTCCATAAGCATGTTTCTTC 22  
|||||  
Sbjct: 546 AGGAGGTATTCGTACAAAGAAG 525  
>miR7719-5p Score: 0.0 R03G\_10774  
Query: 1 TCCTCCATAAGCATGTTTCTTC 22  
|||||  
Sbjct: 513 AGGAGGTATTCGTACAAAGAAG 492  
>miR7719-5p Score: 0.0 R03G\_08849  
Query: 1 TCCTCCATAAGCATGTTTCTTC 22  
|||||  
Sbjct: 546 AGGAGGTATTCGTACAAAGAAG 525  
>miR7719-5p Score: 1.0 R03G\_05936  
Query: 1 TCCTCCATAAGCATGTTTCTTC 22  
|\*|||||  
Sbjct: 546 ACGAGGTATTCGTACAAAGAAG 525  
>miR7719-5p Score: 1.0 R03G\_05420  
Query: 1 TCCTCCATAAGCATGTTTCTTC 22  
|\*|||||  
Sbjct: 407 ACGAGGTATTCGTACAAAGAAG 386

>miR7719-5p Score: 0.2 R03G\_17276  
Query: 1 TCCTCCATAAGCATGTTTCTTC 22  
|||||||:||||  
Sbjct: 636 AGGAGGTATTCGTACAAAGGAG 615

>miR5177 Score: 2.5 R03G\_16800  
Query: 1 TGAGGTTGGAAAACGAGCAG 20  
|||||:||||\*\*|||||  
Sbjct: 1215 ACTCCAGCCTTCCGCTCGTC 1196

>miR5177 Score: 2.5 R03G\_15748  
Query: 1 TGAGGTTGGAAAACGAGCAG 20  
\*||:|||||||\*||\*  
Sbjct: 69 TCTTCAACCTTTTGCTTATA 50

>miR5177 Score: 2.5 R03G\_15265  
Query: 1 TGAGGTTGGAAAACGAGCAG 20  
|||||:||||\*\*|||||  
Sbjct: 1215 ACTCCAGCCTTCCGCTCGTC 1196

>miR5177 Score: 2.5 R03G\_15268  
Query: 1 TGAGGTTGGAAAACGAGCAG 20  
|||||:||||\*\*|||||  
Sbjct: 1215 ACTCCAGCCTTCCGCTCGTC 1196

>miR5177 Score: 2.5 R03G\_13129  
Query: 1 TGAGGTTGGAAAACGAGCAG 20  
|:|||||||\*||\*|||  
Sbjct: 365 ATTCCAACCTTTGGCTAGTC 346

>miR5177 Score: 2.5 R03G\_13219  
Query: 1 TGAGGTTGGAAAACGAGCAG 20  
|||||:||||\*\*|||||  
Sbjct: 1215 ACTCCAGCCTTCCGCTCGTC 1196

>miR5177 Score: 2.5 R03G\_13222  
Query: 1 TGAGGTTGGAAAACGAGCAG 20  
|||||:||||\*\*|||||  
Sbjct: 1209 ACTCCAGCCTTCCGCTCGTC 1190

>miR5177 Score: 1.5 R03G\_12627  
Query: 1 TGAGGTTGGAAAACGAGCAG 20  
\*|||||||\*|||||||  
Sbjct: 1137 CCTCCAACCTTCTGCTCGTC 1118

>miR5177 Score: 2.5 R03G\_05640  
Query: 1 TGAGGTTGGAAAACGAGCAG 20  
|||||:||||\*\*|||||  
Sbjct: 1152 ACTCCAGCCTTCCGCTCGTC 1133

>miR5177 Score: 2.5 R03G\_05952  
Query: 1 TGAGGTTGGAAAACGAGCAG 20  
|||||:||||\*\*|||||  
Sbjct: 1095 ACTCCAGCCTTCCGCTCGTC 1076

>miR5177 Score: 2.5 R03G\_05990

Query: 1 TGAGGTTGGAAAACGAGCAG 20  
|||\*||||\*||||||\*||  
Sbjct: 1236 ACTACAACCTTTGCTCTTC 1217  
>miR5177 Score: 2.5 R03G\_06701  
Query: 1 TGAGGTTGGAAAACGAGCAG 20  
|||:||||\*|||||||  
Sbjct: 336 ACTTAAACCATTTGCTCGTC 317  
>miR5177 Score: 2.5 R03G\_04121  
Query: 1 TGAGGTTGGAAAACGAGCAG 20  
|||||:||||\*\*|||||  
Sbjct: 1215 ACTCCAGCCTTCCGCTCGTC 1196  
>miR5177 Score: 2.5 R03G\_00075  
Query: 1 TGAGGTTGGAAAACGAGCAG 20  
\*||\*||||||\*|||||||  
Sbjct: 1233 CCTACAACCTATTGCTCGTC 1214  
>miR5177 Score: 2.0 R03G\_01141  
Query: 1 TGAGGTTGGAAAACGAGCAG 20  
||||:||||||\*||||\*||  
Sbjct: 517 ACTCTAACCTTTTCGCTC-TC 499  
>miR5177 Score: 0.0 R03G\_17015  
Query: 1 TGAGGTTGGAAAACGAGCAG 20  
|||||||  
Sbjct: 1227 ACTCCAACCTTTTGCTCGTC 1208  
>miR6248 Score: 2.5 R03G\_16143  
Query: 1 TATTGAGGTGGAGGTTAGTG 20  
\*||:||:|||||:||\*||  
Sbjct: 538 TTAGCTTCACCTCTAATAAC 519  
>miR6248 Score: 2.5 R03G\_16292  
Query: 1 TATTGAGGTGGAGGTTAGTG 20  
:||:|||||||\*||:\*\|  
Sbjct: 658 GTAGCTCCACCTCCCATT-C 640  
>miR6248 Score: 2.5 R03G\_15135  
Query: 1 TATTGAGGTGGAGGTTAGTG 20  
\*||:||:|||||:||\*||  
Sbjct: 538 TTAGCTTCACCTCTAATAAC 519  
>miR6248 Score: 0.0 R03G\_12949  
Query: 1 TATTGAGGTGGAGGTTAGTG 20  
|||||||  
Sbjct: 766 ATAACTCCACCTCCAATCAC 747  
>miR6248 Score: 2.5 R03G\_12534  
Query: 1 TATTGAGGTGGAGGTTAGTG 20  
\*||:||:|||||:||\*||  
Sbjct: 538 TTAGCTTCACCTCTAATAAC 519  
>miR6248 Score: 2.5 R03G\_10206  
Query: 1 TATTGAGGTGGAGGTTAG-TG 20

|||||\*||:|\*||  
Sbjct: 425 ATAACTCCACCACCGGTCTAC 405  
>miR6248 Score: 2.5 R03G\_07027  
Query: 1 TATTGAGGTGGAGGTTAGTG 20  
\*||:|:|||||:|\*||  
Sbjct: 538 TTAGCTTCACCTCTAATAAC 519  
>miR6248 Score: 2.5 R03G\_05683  
Query: 1 TATTGAGGTGGAGGTTAGTG 20  
|||||\*||:|\*||  
Sbjct: 551 ATAACTCCACCACCAG-CAC 533  
>miR6248 Score: 2.5 R03G\_06727  
Query: 1 TATTGAGGTGGAGGTTAGTG 20  
\*||:|:|||||:|\*||  
Sbjct: 676 TTAGCTTCACCTCTAATAAC 657  
>miR6248 Score: 2.0 R03G\_04538  
Query: 1 TATTGAGGTGGAGGTTAGTG 20  
\*|||||\*||\*  
Sbjct: 1595 CTAACCTCCACCTCCAACCAA 1576  
>miR6248 Score: 2.5 R03G\_02690  
Query: 1 TATTGAGGTGGAGGTTAGTG 20  
\*||:|:|||||:|\*||  
Sbjct: 118 TTAGCTTCACCTCTAATAAC 99  
>miR6248 Score: 0.0 R03G\_04050  
Query: 1 TATTGAGGTGGAGGTTAGTG 20  
|||||\*||\*  
Sbjct: 1321 ATAACTCCACCTCCAATCAC 1302  
>miR6248 Score: 2.5 R03G\_04118  
Query: 1 TATTGAGGTGGAGGTTAGTG 20  
\*||:|:|||||:|\*||  
Sbjct: 538 TTAGCTTCACCTCTAATAAC 519  
>miR6248 Score: 0.0 R03G\_00301  
Query: 1 TATTGAGGTGGAGGTTAGTG 20  
|||||\*||\*  
Sbjct: 2605 ATAACTCCACCTCCAATCAC 2586  
>miR6248 Score: 2.5 R03G\_00949  
Query: 1 TATTGAGGTGGAGGTTAGTG 20  
\*||||\*|||||\*||  
Sbjct: 2045 CTAACACCACCTCCAA-CAC 2027  
>miR6248 Score: 2.5 R03G\_17384  
Query: 1 TATTGAGGTGGAGGTTAGTG 20  
\*||:|:|||||:|\*||  
Sbjct: 538 TTAGCTTCACCTCTAATAAC 519  
>miR6248 Score: 2.5 R03G\_17318  
Query: 1 TATTGAGGTGGAGGTTAGTG 20  
\*||:|:|||||:|\*||

Sbjct: 538 TTAGCTTCACCTCTAATAAC 519  
>miR6248 Score: 2.5 R03G\_17274  
Query: 1 TATTGAGGTGGAGGTTAGTG 20  
\*||:|:|||||:|\*||  
Sbjct: 538 TTAGCTTCACCTCTAATAAC 519  
>miR1849 Score: 0.0 R03G\_16810  
Query: 1 TAGCGTATCATAGGTTGGT 19  
|||||  
Sbjct: 216 ATCGCATAGTATCCAACCA 198  
>miR1849 Score: 0.0 R03G\_15157  
Query: 1 TAGCGTATCATAGGTTGGT 19  
|||||  
Sbjct: 573 ATCGCATAGTATCCAACCA 555  
>miR1849 Score: 2.5 R03G\_14264  
Query: 1 TAGCGTATCATAGGTTGGT 19  
||\*||:||||:|||||::  
Sbjct: 290 ATAGCGTAGTGTCCAACCTG 272  
>miR1849 Score: 1.5 R03G\_12960  
Query: 1 TAGCGTATCATAGGTTGGT 19  
\*||||:|||||:||||  
Sbjct: 234 CTCGCGTAGTATCCGACCA 216  
>miR1849 Score: 1.5 R03G\_12974  
Query: 1 TAGCGTATCATAGGTTGGT 19  
\*||||:|||||:||||  
Sbjct: 234 CTCGCGTAGTATCCGACCA 216  
>miR1849 Score: 0.0 R03G\_12005  
Query: 1 TAGCGTATCATAGGTTGGT 19  
|||||  
Sbjct: 573 ATCGCATAGTATCCAACCA 555  
>miR1849 Score: 0.0 R03G\_12080  
Query: 1 TAGCGTATCATAGGTTGGT 19  
|||||  
Sbjct: 156 ATCGCATAGTATCCAACCA 138  
>miR1849 Score: 2.2 R03G\_12201  
Query: 1 TAGCGTATCATAGGTTGGT 19  
:||\*|:|||||\*  
Sbjct: 36 GTCGAGTAGTATCCAACCT 18  
>miR1849 Score: 0.0 R03G\_11407  
Query: 1 TAGCGTATCATAGGTTGGT 19  
|||||  
Sbjct: 156 ATCGCATAGTATCCAACCA 138  
>miR1849 Score: 1.5 R03G\_11953  
Query: 1 TAGCGTATCATAGGTTGGT 19  
\*||||:|||||:||||  
Sbjct: 450 CTCGCGTAGTATCCGACCA 432

>miR1849 Score: 1.5 R03G\_10525  
Query: 1 TAGCGTATCATAGGTTGGT 19  
\*||||:|||||||:||||  
Sbjct: 573 CTCGCGTAGTATCCGACCA 555

>miR1849 Score: 1.5 R03G\_10531  
Query: 1 TAGCGTATCATAGGTTGGT 19  
\*||||:|||||||:||||  
Sbjct: 573 CTCGCGTAGTATCCGACCA 555

>miR1849 Score: 1.5 R03G\_10545  
Query: 1 TAGCGTATCATAGGTTGGT 19  
\*||||:|||||||:||||  
Sbjct: 573 CTCGCGTAGTATCCGACCA 555

>miR1849 Score: 2.5 R03G\_09022  
Query: 1 TAGCGTATCATAGGTTGGT 19  
\*\*||:|||||||\*|  
Sbjct: 1337 CACGTATAGTATCCAAC-A 1320

>miR1849 Score: 1.5 R03G\_07110  
Query: 1 TAGCGTATCATAGGTTGGT 19  
\*||||:|||||||:||||  
Sbjct: 573 CTCGCGTAGTATCCGACCA 555

>miR1849 Score: 1.5 R03G\_07676  
Query: 1 TAGCGTATCATAGGTTGGT 19  
\*||||:|||||||:||||  
Sbjct: 573 CTCGCGTAGTATCCGACCA 555

>miR1849 Score: 1.5 R03G\_07678  
Query: 1 TAGCGTATCATAGGTTGGT 19  
\*||||:|||||||:||||  
Sbjct: 573 CTCGCGTAGTATCCGACCA 555

>miR1849 Score: 1.5 R03G\_05523  
Query: 1 TAGCGTATCATAGGTTGGT 19  
\*||||:|||||||:||||  
Sbjct: 573 CTCGCGTAGTATCCGACCA 555

>miR1849 Score: 0.0 R03G\_05928  
Query: 1 TAGCGTATCATAGGTTGGT 19  
|||||||  
Sbjct: 345 ATCGCATAGTATCCAACCA 327

>miR1849 Score: 0.0 R03G\_04676  
Query: 1 TAGCGTATCATAGGTTGGT 19  
|||||||  
Sbjct: 573 ATCGCATAGTATCCAACCA 555

>miR1849 Score: 2.5 R03G\_02881  
Query: 1 TAGCGTATCATAGGTTGGT 19  
|||||||\*|:|\*|  
Sbjct: 636 ATCGCATAGTACTCGAC-A 619

>miR1849 Score: 2.5 R03G\_03254

Query: 1 TAGCGTATCATAGGTTGGT 19  
:|\*\*|||||||:|  
Sbjct: 114 GTGACATAGTATCCAACTA 96  
>miR1849 Score: 1.5 R03G\_03767  
Query: 1 TAGCGTATCATAGGTTGGT 19  
\*||||:|||||||:||||  
Sbjct: 573 CTCGCGTAGTATCCGACCA 555  
>miR1849 Score: 2.5 R03G\_00382  
Query: 1 TAGCGTATCATAGGTTGGT 19  
\*|||\*|||||||:||||\*|  
Sbjct: 351 TTCGAATAGTATTCAAC-A 334  
>miR1849 Score: 1.5 R03G\_01949  
Query: 1 TAGCGTATCATAGGTTGGT 19  
\*||||:|||||||:||||  
Sbjct: 573 CTCGCGTAGTATCCGACCA 555  
>miR1849 Score: 1.5 R03G\_01968  
Query: 1 TAGCGTATCATAGGTTGGT 19  
\*||||:|||||||:||||  
Sbjct: 573 CTCGCGTAGTATCCGACCA 555  
>miR1849 Score: 1.5 R03G\_17380  
Query: 1 TAGCGTATCATAGGTTGGT 19  
\*||||:|||||||:||||  
Sbjct: 573 CTCGCGTAGTATCCGACCA 555  
>miR535a Score: 1.0 R03G\_16800  
Query: 1 TGGCAACGAAGAAGAGAGCAGC 22  
||||\*|||||||  
Sbjct: 3987 ACCGTCGCTTCTTCTCTCGTCG 3966  
>miR535a Score: 2.5 R03G\_15265  
Query: 1 TGGCAACGAAGAAGAGAGCAGC 22  
||||\*|||||||\*|||  
Sbjct: 3987 ACCGTCTTCTTCTCTCTTCG 3966  
>miR535a Score: 2.5 R03G\_15267  
Query: 1 TGGCAACGAAGAAGAGAGCAGC 22  
||||\*|||||||\*|||  
Sbjct: 1749 ACCGTCTTCTTCTCTCTTCG 1728  
>miR535a Score: 2.0 R03G\_15268  
Query: 1 TGGCAACGAAGAAGAGAGCAGC 22  
||||\*|||||||\*|||  
Sbjct: 3993 ACCGTCTTCTTCTCTCGTCG 3972  
>miR535a Score: 2.0 R03G\_14350  
Query: 1 TGGCAACGAAGAAGAGAGCAGC 22  
||||\*|||||||\*|||  
Sbjct: 3858 ACCGTCTTCTTCTCTCGTCG 3837  
>miR535a Score: 2.5 R03G\_14777  
Query: 1 TGGCAACGAAGAAGAGAGCAGC 22



||||\*\*||||||||||||\*|||  
Sbjct: 1686 ACCGTCTCTTCTTCTCTCTCG 1665  
>miR535a Score: 2.0 R03G\_13217  
Query: 1 TGGCAACGAAGAAGAGAGCAGC 22  
||||\*\*|||||||||||||  
Sbjct: 3987 ACCGTCTCTTCTTCTCTCGTCG 3966  
>miR535a Score: 1.0 R03G\_13226  
Query: 1 TGGCAACGAAGAAGAGAGCAGC 22  
||||\*|||||||||||||  
Sbjct: 99 ACCGTCGCTTCTTCTCTCGTCG 78  
>miR535a Score: 2.0 R03G\_11967  
Query: 1 TGGCAACGAAGAAGAGAGCAGC 22  
||||\*\*|||||||||||||  
Sbjct: 4014 ACCGTCTCTTCTTCTCTCGTCG 3993  
>miR535a Score: 2.5 R03G\_07661  
Query: 1 TGGCAACGAAGAAGAGAGCAGC 22  
||\*|||:||||||||\*||\*  
Sbjct: 839 ACCATTGTTTCTTCTCTCCTCA 818  
>miR535a Score: 1.0 R03G\_05953  
Query: 1 TGGCAACGAAGAAGAGAGCAGC 22  
||||\*|||||||||||||  
Sbjct: 2946 ACCGTCGCTTCTTCTCTCGTCG 2925  
>miR535a Score: 2.5 R03G\_04121  
Query: 1 TGGCAACGAAGAAGAGAGCAGC 22  
||||\*\*||||||||\*|||  
Sbjct: 3987 ACCGTCTCTTCTTCTCTCTCG 3966  
>miR160b-3p Score: 2.5 R03G\_00397  
Query: 1 CGTACAGAGTAGTCAAGCAT 20  
\*||||||:|::||||\*|  
Sbjct: 308 CCATGTCTTATTGGTTCG-A 290  
>miR5176-5p Score: 0.2 R03G\_15862  
Query: 1 TATTCCATGTGTCACATCTC 20  
:|||||||||  
Sbjct: 595 GTAAGGTACACAGTGTAGAG 576  
>miR5176-5p Score: 0.2 R03G\_15274  
Query: 1 TATTCCATGTGTCACATCTC 20  
:|||||||||  
Sbjct: 595 GTAAGGTACACAGTGTAGAG 576  
>miR5176-5p Score: 0.2 R03G\_15288  
Query: 1 TATTCCATGTGTCACATCTC 20  
:|||||||||  
Sbjct: 595 GTAAGGTACACAGTGTAGAG 576  
>miR5176-5p Score: 0.2 R03G\_13916  
Query: 1 TATTCCATGTGTCACATCTC 20  
:|||||||||

Sbjct: 595 GTAAGGTACACAGTGTAGAG 576  
>miR5176-5p Score: 0.0 R03G\_12182  
Query: 1 TATTCCATGTGTCACATCTC 20  
|||||

Sbjct: 595 ATAAGGTACACAGTGTAGAG 576  
>miR5176-5p Score: 0.2 R03G\_12541  
Query: 1 TATTCCATGTGTCACATCTC 20  
:|||||

Sbjct: 595 GTAAGGTACACAGTGTAGAG 576  
>miR5176-5p Score: 0.2 R03G\_11272  
Query: 1 TATTCCATGTGTCACATCTC 20  
:|||||

Sbjct: 595 GTAAGGTACACAGTGTAGAG 576  
>miR5176-5p Score: 0.2 R03G\_11784  
Query: 1 TATTCCATGTGTCACATCTC 20  
:|||||

Sbjct: 595 GTAAGGTACACAGTGTAGAG 576  
>miR5176-5p Score: 0.0 R03G\_10860  
Query: 1 TATTCCATGTGTCACATCTC 20  
|||||

Sbjct: 595 ATAAGGTACACAGTGTAGAG 576  
>miR5176-5p Score: 0.2 R03G\_09496  
Query: 1 TATTCCATGTGTCACATCTC 20  
:|||||

Sbjct: 595 GTAAGGTACACAGTGTAGAG 576  
>miR5176-5p Score: 0.0 R03G\_08111  
Query: 1 TATTCCATGTGTCACATCTC 20  
|||||

Sbjct: 595 ATAAGGTACACAGTGTAGAG 576  
>miR5176-5p Score: 0.0 R03G\_07729  
Query: 1 TATTCCATGTGTCACATCTC 20  
|||||

Sbjct: 364 ATAAGGTACACAGTGTAGAG 345  
>miR5176-5p Score: 2.5 R03G\_04287  
Query: 1 TATTCCATGTGTCACATCTC 20  
||:|\*|:|||||\*||

Sbjct: 1132 ATGAGCTGCACAGTGTA-AG 1114  
>miR5176-5p Score: 2.5 R03G\_04878  
Query: 1 TATTCCATGTGTCACATCTC 20  
||:|\*|:|||||\*||

Sbjct: 943 ATGAGCTGCACAGTGTA-AG 925  
>miR5176-5p Score: 0.0 R03G\_02682  
Query: 1 TATTCCATGTGTCACATCTC 20  
|||||

Sbjct: 595 ATAAGGTACACAGTGTAGAG 576

>miR5176-5p Score: 2.0 R03G\_02988  
Query: 1 TATTCCATGTGTCACATC-TC 20  
\*|||||||\*||||||\*||  
Sbjct: 1347 TTAAGGTACAAAGTGTAGTAG 1327

>miR5176-5p Score: 0.0 R03G\_17289  
Query: 1 TATTCCATGTGTCACATCTC 20  
|||||||  
Sbjct: 595 ATAAGGTACACAGTGTAGAG 576

>miR8602 Score: 0.0 R03G\_17259  
Query: 1 TCAGGAGAGTATGCTGGCCA 20  
|||||||  
Sbjct: 209 AGTCCTCTCATACGACCGGT 190

>miR8602 Score: 0.0 R03G\_17249  
Query: 1 TCAGGAGAGTATGCTGGCCA 20  
|||||||  
Sbjct: 728 AGTCCTCTCATACGACCGGT 709

>miR8602 Score: 2.0 R03G\_17207  
Query: 1 TCAGGAGAGTATGCTGGCCA 20  
||||\*||:||:|||||||  
Sbjct: 161 AGTCCACTTATATGACCGGT 142

>miR8602 Score: 1.5 R03G\_16536  
Query: 1 TCAGGAGAGTATGCTGGCCA 20  
||||\*||:|||||||  
Sbjct: 122 AGTCCGCTTATACGACCGGT 103

>miR8602 Score: 2.0 R03G\_15895  
Query: 1 TCAGGAGAGTATGCTGGCCA 20  
||||\*||:||:|||||||  
Sbjct: 122 AGTCCACTTATATGACCGGT 103

>miR8602 Score: 1.5 R03G\_15166  
Query: 1 TCAGGAGAGTATGCTGGCCA 20  
||||\*||:|||||||  
Sbjct: 809 AGTCCACTTATACGACCGGT 790

>miR8602 Score: 0.0 R03G\_14363  
Query: 1 TCAGGAGAGTATGCTGGCCA 20  
|||||||  
Sbjct: 761 AGTCCTCTCATACGACCGGT 742

>miR8602 Score: 0.5 R03G\_14547  
Query: 1 TCAGGAGAGTATGCTGGCCA 20  
|||||||:||||  
Sbjct: 209 AGTCCTCTCATACGATCGGT 190

>miR8602 Score: 0.5 R03G\_13921  
Query: 1 TCAGGAGAGTATGCTGGCCA 20  
||:|||||||  
Sbjct: 209 AGTTCTCTCATACGACCGGT 190

>miR8602 Score: 0.0 R03G\_13863

Query: 1 TCAGGAGAGTATGCTGGCCA 20  
|||||  
Sbjct: 503 AGTCCTCTCATACGACCGGT 484  
>miR8602 Score: 0.0 R03G\_13270  
Query: 1 TCAGGAGAGTATGCTGGCCA 20  
|||||  
Sbjct: 803 AGTCCTCTCATACGACCGGT 784  
>miR8602 Score: 0.0 R03G\_11527  
Query: 1 TCAGGAGAGTATGCTGGCCA 20  
|||||  
Sbjct: 209 AGTCCTCTCATACGACCGGT 190  
>miR8602 Score: 0.8 R03G\_10734  
Query: 1 TCAGGAGAGTATGCTGGCCA 20  
:|||||:|||||  
Sbjct: 209 GGTCCCTCTCATACGACTGGT 190  
>miR8602 Score: 0.0 R03G\_10774  
Query: 1 TCAGGAGAGTATGCTGGCCA 20  
|||||  
Sbjct: 770 AGTCCTCTCATACGACCGGT 751  
>miR8602 Score: 0.0 R03G\_10869  
Query: 1 TCAGGAGAGTATGCTGGCCA 20  
|||||  
Sbjct: 209 AGTCCTCTCATACGACCGGT 190  
>miR8602 Score: 1.5 R03G\_07577  
Query: 1 TCAGGAGAGTATGCTGGCCA 20  
||||\*||:|||||  
Sbjct: 161 AGTCCAATTATACGACCGGT 142  
>miR8602 Score: 2.5 R03G\_07783  
Query: 1 TCAGGAGAGTATGCTGGCCA 20  
|||||\*||\*||  
Sbjct: 677 AGTCCTCTCTTACGACACGT 658  
>miR8602 Score: 0.0 R03G\_05935  
Query: 1 TCAGGAGAGTATGCTGGCCA 20  
|||||  
Sbjct: 209 AGTCCTCTCATACGACCGGT 190  
>miR8602 Score: 1.5 R03G\_05940  
Query: 1 TCAGGAGAGTATGCTGGCCA 20  
||||\*||:|||||  
Sbjct: 518 AGTCCAATTATACGACCGGT 499  
>miR8602 Score: 2.0 R03G\_04692  
Query: 1 TCAGGAGAGTATGCTGGCCA 20  
||||\*||:|||:|||||  
Sbjct: 161 AGTCCAATTATATGACCGGT 142  
>miR8602 Score: 0.0 R03G\_04790  
Query: 1 TCAGGAGAGTATGCTGGCCA 20

|||||  
Sbjct: 209 AGTCCTCTCATACGACCGGT 190  
>miR8602 Score: 0.0 R03G\_03593  
Query: 1 TCAGGAGAGTATGCTGGCCA 20  
|||||  
Sbjct: 209 AGTCCTCTCATACGACCGGT 190  
>miR8602 Score: 0.0 R03G\_03626  
Query: 1 TCAGGAGAGTATGCTGGCCA 20  
|||||  
Sbjct: 209 AGTCCTCTCATACGACCGGT 190  
>miR8602 Score: 2.5 R03G\_03629  
Query: 1 TCAGGAGAGTATGCTGGCCA 20  
|||||:||||\*|||\*|  
Sbjct: 1085 AGTCCTCTTATACCACC-TT 1067  
>miR8602 Score: 1.5 R03G\_00237  
Query: 1 TCAGGAGAGTATGCTGGCCA 20  
||||\*||:|||||  
Sbjct: 278 AGTCCACTTATACGACCGGT 259  
>miR8602 Score: 0.0 R03G\_00678  
Query: 1 TCAGGAGAGTATGCTGGCCA 20  
|||||  
Sbjct: 173 AGTCCTCTCATACGACCGGT 154  
>miR8602 Score: 0.0 R03G\_01589  
Query: 1 TCAGGAGAGTATGCTGGCCA 20  
|||||  
Sbjct: 209 AGTCCTCTCATACGACCGGT 190  
>miR8602 Score: 0.8 R03G\_17459  
Query: 1 TCAGGAGAGTATGCTGGCCA 20  
:|||||:|||  
Sbjct: 209 GGCCTCTCATACGACTGGT 190  
>miR8602 Score: 0.0 R03G\_17276  
Query: 1 TCAGGAGAGTATGCTGGCCA 20  
|||||  
Sbjct: 893 AGTCCTCTCATACGACCGGT 874  
>miR1043-3p Score: 1.0 R03G\_17190  
Query: 1 TTGCGCGTTGAGATTTGAAGGA 22  
|||||\*|||||  
Sbjct: 219 AACGCGCAACTCCAAACTTCCT 198  
>miR1043-3p Score: 1.0 R03G\_14599  
Query: 1 TTGCGCGTTGAGATTTGAAGGA 22  
|||||\*|||||  
Sbjct: 27 AACGCGCAACTCCAAACTTCCT 6  
>miR1043-3p Score: 1.0 R03G\_11282  
Query: 1 TTGCGCGTTGAGATTTGAAGGA 22  
|||||\*|||||

Sbjct: 219 AACGCGCAACTCCAAACTTCCT 198  
>miR1043-3p Score: 1.0 R03G\_11484  
Query: 1 TTGCGCGTTGAGATTTGAAGGA 22  
|||||\*|||||  
Sbjct: 219 AACGCGCAACTCCAAACTTCCT 198  
>miR1043-3p Score: 1.0 R03G\_10358  
Query: 1 TTGCGCGTTGAGATTTGAAGGA 22  
|||||\*|||||  
Sbjct: 27 AACGCGCAACTCCAAACTTCCT 6  
>miR1043-3p Score: 1.0 R03G\_10071  
Query: 1 TTGCGCGTTGAGATTTGAAGGA 22  
|||||\*|||||  
Sbjct: 27 AACGCGCAACTCCAAACTTCCT 6  
>miR1043-3p Score: 2.5 R03G\_09040  
Query: 1 TTGCGCGTTGAGATTTGAAGGA 22  
|||||\*|||||\*||:|||||  
Sbjct: 219 AACGCGGAACTCCAAGCTTCCT 198  
>miR1043-3p Score: 1.0 R03G\_02458  
Query: 1 TTGCGCGTTGAGATTTGAAGGA 22  
|||||\*|||||\*|||||  
Sbjct: 219 AACGCGCAACTCCAAACTTCCT 198  
>miR7814 Score: 2.5 R03G\_16088  
Query: 1 TAATATGTCTTTGATGCTT-TGA 22  
:|||||\*|||||\*|\*|:|  
Sbjct: 553 GTTATACAAAACACTACGTATATT 531  
>miR7814 Score: 0.0 R03G\_15585  
Query: 1 TAATATGTCTTTGATGCTTTGA 22  
|||||  
Sbjct: 3018 ATTATACAGAACTACGAAACT 2997  
>miR7814 Score: 0.0 R03G\_15250  
Query: 1 TAATATGTCTTTGATGCTTTGA 22  
|||||  
Sbjct: 3171 ATTATACAGAACTACGAAACT 3150  
>miR7814 Score: 0.0 R03G\_14355  
Query: 1 TAATATGTCTTTGATGCTTTGA 22  
|||||  
Sbjct: 1422 ATTATACAGAACTACGAAACT 1401  
>miR7814 Score: 0.0 R03G\_13867  
Query: 1 TAATATGTCTTTGATGCTTTGA 22  
|||||  
Sbjct: 3132 ATTATACAGAACTACGAAACT 3111  
>miR7814 Score: 0.5 R03G\_13920  
Query: 1 TAATATGTCTTTGATGCTTTGA 22  
|||||:|||||  
Sbjct: 3216 ATTATATAGAACTACGAAACT 3195

>miR7814 Score: 0.0 R03G\_13749  
Query: 1 TAATATGTCTTTGATGCTTTGA 22  
|||||  
Sbjct: 1779 ATTATACAGAACTACGAACT 1758

>miR7814 Score: 0.0 R03G\_11776  
Query: 1 TAATATGTCTTTGATGCTTTGA 22  
|||||  
Sbjct: 306 ATTATACAGAACTACGAACT 285

>miR7814 Score: 0.0 R03G\_10558  
Query: 1 TAATATGTCTTTGATGCTTTGA 22  
|||||  
Sbjct: 969 ATTATACAGAACTACGAACT 948

>miR7814 Score: 0.0 R03G\_09965  
Query: 1 TAATATGTCTTTGATGCTTTGA 22  
|||||  
Sbjct: 3216 ATTATACAGAACTACGAACT 3195

>miR7814 Score: 0.0 R03G\_05619  
Query: 1 TAATATGTCTTTGATGCTTTGA 22  
|||||  
Sbjct: 1359 ATTATACAGAACTACGAACT 1338

>miR7814 Score: 0.0 R03G\_06427  
Query: 1 TAATATGTCTTTGATGCTTTGA 22  
|||||  
Sbjct: 2808 ATTATACAGAACTACGAACT 2787

>miR7814 Score: 0.0 R03G\_06428  
Query: 1 TAATATGTCTTTGATGCTTTGA 22  
|||||  
Sbjct: 2310 ATTATACAGAACTACGAACT 2289

>miR7814 Score: 0.0 R03G\_06442  
Query: 1 TAATATGTCTTTGATGCTTTGA 22  
|||||  
Sbjct: 3873 ATTATACAGAACTACGAACT 3852

>miR7814 Score: 0.0 R03G\_05279  
Query: 1 TAATATGTCTTTGATGCTTTGA 22  
|||||  
Sbjct: 162 ATTATACAGAACTACGAACT 141

>miR7814 Score: 0.5 R03G\_02691  
Query: 1 TAATATGTCTTTGATGCTTTGA 22  
|||||:|||||  
Sbjct: 6705 ATTATATAGAACTACGAACT 6684

>miR7814 Score: 0.0 R03G\_02959  
Query: 1 TAATATGTCTTTGATGCTTTGA 22  
|||||  
Sbjct: 3216 ATTATACAGAACTACGAACT 3195

>miR7814 Score: 0.5 R03G\_03547

Query: 1 TAATATGTCTTTGATGCTTTGA 22  
|||||:|||||  
Sbjct: 3216 ATTATATAGAAACTACGAAACT 3195  
>miR7814 Score: 0.0 R03G\_04115  
Query: 1 TAATATGTCTTTGATGCTTTGA 22  
|||||:|||||  
Sbjct: 159 ATTATACAGAAACTACGAAACT 138  
>miR7814 Score: 1.0 R03G\_00306  
Query: 1 TAATATGTCTTTGATGCTTTGA 22  
|\*|||||  
Sbjct: 1512 ACTATACAGAAACTACGAAACT 1491  
>miR7814 Score: 1.0 R03G\_01330  
Query: 1 TAATATGTCTTTGATGCTTTGA 22  
|\*|||||  
Sbjct: 450 ATCATACAGAAACTACGAAACT 429  
>miR7814 Score: 0.5 R03G\_01613  
Query: 1 TAATATGTCTTTGATGCTTTGA 22  
|||||:|||||  
Sbjct: 1467 ATTATACGGAAACTACGAAACT 1446  
>miR7814 Score: 2.5 R03G\_02034  
Query: 1 TAATATGTCTTTGATGCTTTGA 22  
|||||:|||||:|:|:|\*|  
Sbjct: 1302 ATTATATAGAAATTATGGGAGT 1281  
>miR7814 Score: 0.0 R03G\_02222  
Query: 1 TAATATGTCTTTGATGCTTTGA 22  
|||||:|||||  
Sbjct: 270 ATTATACAGAAACTACGAAACT 249  
>miR7814 Score: 0.0 R03G\_17371  
Query: 1 TAATATGTCTTTGATGCTTTGA 22  
|||||:|||||  
Sbjct: 3171 ATTATACAGAAACTACGAAACT 3150  
>miR7814 Score: 0.0 R03G\_17326  
Query: 1 TAATATGTCTTTGATGCTTTGA 22  
|||||:|||||  
Sbjct: 3048 ATTATACAGAAACTACGAAACT 3027  
>miR6116-3p Score: 0.0 R03G\_15681  
Query: 1 TCATTTGTCATCCAAGCATTAG 22  
|||||:|||||  
Sbjct: 65 AGTAAACAGTAGGTTTCGTAATC 44  
>miR6116-3p Score: 0.0 R03G\_13488  
Query: 1 TCATTTGTCATCCAAGCATTAG 22  
|||||:|||||  
Sbjct: 65 AGTAAACAGTAGGTTTCGTAATC 44  
>miR6116-3p Score: 0.0 R03G\_13491  
Query: 1 TCATTTGTCATCCAAGCATTAG 22



|||||  
Sbjct: 65 AGTAAACAGTAGGTTTCGTAATC 44  
>miR6116-3p Score: 0.0 R03G\_12001  
Query: 1 TCATTTGTCATCCAAGCATTAG 22  
|||||  
Sbjct: 806 AGTAAACAGTAGGTTTCGTAATC 785  
>miR6116-3p Score: 0.0 R03G\_10556  
Query: 1 TCATTTGTCATCCAAGCATTAG 22  
|||||  
Sbjct: 806 AGTAAACAGTAGGTTTCGTAATC 785  
>miR6116-3p Score: 0.0 R03G\_05824  
Query: 1 TCATTTGTCATCCAAGCATTAG 22  
|||||  
Sbjct: 65 AGTAAACAGTAGGTTTCGTAATC 44  
>miR6116-3p Score: 0.0 R03G\_03517  
Query: 1 TCATTTGTCATCCAAGCATTAG 22  
|||||  
Sbjct: 65 AGTAAACAGTAGGTTTCGTAATC 44  
>miR6116-3p Score: 0.0 R03G\_03518  
Query: 1 TCATTTGTCATCCAAGCATTAG 22  
|||||  
Sbjct: 65 AGTAAACAGTAGGTTTCGTAATC 44  
>miR6116-3p Score: 0.0 R03G\_01302  
Query: 1 TCATTTGTCATCCAAGCATTAG 22  
|||||  
Sbjct: 377 AGTAAACAGTAGGTTTCGTAATC 356  
>miR6116-3p Score: 0.0 R03G\_17369  
Query: 1 TCATTTGTCATCCAAGCATTAG 22  
|||||  
Sbjct: 806 AGTAAACAGTAGGTTTCGTAATC 785  
>miR6473 Score: 2.2 R03G\_14532  
Query: 1 TCCACAATGCCAAAGAGTT 19  
|||||::|:|:|  
Sbjct: 3029 AGGTGTTGTGGTTTTTTTGA 3011  
>miR6473 Score: 2.5 R03G\_14295  
Query: 1 TCCACAATGCCAAAGAGTT 19  
|||||\*|:|:|\*|  
Sbjct: 35 AGGTGTAATGGTTTCTTTA 17  
>miR6473 Score: 2.2 R03G\_13808  
Query: 1 TCCACAATGCCAAAGAGTT 19  
|||||::|:|:|  
Sbjct: 329 AGGTGTTGTGGTTTTTTTGA 311  
>miR6473 Score: 2.5 R03G\_13244  
Query: 1 TCCACAATGCCAAAGAGTT 19  
|||\*\*|||:|:|

Sbjct: 4040 AGGACTTATGGTTTCTCAA 4022  
>miR6473 Score: 2.0 R03G\_05727  
Query: 1 TCCACAATGCCAAAGAGTT 19  
||||\*|||||||:|\*|

Sbjct: 406 AGGTTTTACGGTTTTTCTA 388  
>miR6473 Score: 2.0 R03G\_05738  
Query: 1 TCCACAATGCCAAAGAGTT 19  
||||\*|||||||:|\*|

Sbjct: 406 AGGTTTTACGGTTTTTCTA 388  
>miR6473 Score: 2.2 R03G\_03123  
Query: 1 TCCACAATGCCAAAGAGTT 19  
|||||||:|:|:|:|:|

Sbjct: 329 AGGTGTTGTGGTTTTTTGA 311  
>miR6473 Score: 2.2 R03G\_01427  
Query: 1 TCCACAATGCCAAAGAGTT 19  
|||||||:|:|:|:|:|

Sbjct: 329 AGGTGTTGTGGTTTTTTGA 311  
>miR3712 Score: 2.0 R03G\_17220  
Query: 1 TGCTGATCAAGATCAAGACCA 21  
\*:\*|\*|||||||

Sbjct: 536 CTGTCTAGTTCTAGTTCTGGT 516  
>miR3712 Score: 0.0 R03G\_16744  
Query: 1 TGCTGATCAAGATCAAGACCA 21  
|||||||

Sbjct: 578 ACGACTAGTTCTAGTTCTGGT 558  
>miR3712 Score: 0.0 R03G\_16686  
Query: 1 TGCTGATCAAGATCAAGACCA 21  
|||||||

Sbjct: 578 ACGACTAGTTCTAGTTCTGGT 558  
>miR3712 Score: 0.0 R03G\_15869  
Query: 1 TGCTGATCAAGATCAAGACCA 21  
|||||||

Sbjct: 578 ACGACTAGTTCTAGTTCTGGT 558  
>miR3712 Score: 0.0 R03G\_14704  
Query: 1 TGCTGATCAAGATCAAGACCA 21  
|||||||

Sbjct: 578 ACGACTAGTTCTAGTTCTGGT 558  
>miR3712 Score: 0.0 R03G\_13450  
Query: 1 TGCTGATCAAGATCAAGACCA 21  
|||||||

Sbjct: 533 ACGACTAGTTCTAGTTCTGGT 513  
>miR3712 Score: 0.0 R03G\_13859  
Query: 1 TGCTGATCAAGATCAAGACCA 21  
|||||||

Sbjct: 203 ACGACTAGTTCTAGTTCTGGT 183

>miR3712 Score: 1.0 R03G\_12951  
Query: 1 TGCTGATCAAGATCAAGACCA 21  
||\*||||||||||||||||||  
Sbjct: 578 ACAACTAGTTCTAGTTCTGGT 558

>miR3712 Score: 0.0 R03G\_12979  
Query: 1 TGCTGATCAAGATCAAGACCA 21  
||||||||||||||||||||  
Sbjct: 578 ACGACTAGTTCTAGTTCTGGT 558

>miR3712 Score: 0.0 R03G\_13152  
Query: 1 TGCTGATCAAGATCAAGACCA 21  
||||||||||||||||||||  
Sbjct: 578 ACGACTAGTTCTAGTTCTGGT 558

>miR3712 Score: 0.0 R03G\_11970  
Query: 1 TGCTGATCAAGATCAAGACCA 21  
||||||||||||||||||||  
Sbjct: 578 ACGACTAGTTCTAGTTCTGGT 558

>miR3712 Score: 0.0 R03G\_12087  
Query: 1 TGCTGATCAAGATCAAGACCA 21  
||||||||||||||||||||  
Sbjct: 578 ACGACTAGTTCTAGTTCTGGT 558

>miR3712 Score: 0.0 R03G\_12194  
Query: 1 TGCTGATCAAGATCAAGACCA 21  
||||||||||||||||||||  
Sbjct: 578 ACGACTAGTTCTAGTTCTGGT 558

>miR3712 Score: 0.0 R03G\_11275  
Query: 1 TGCTGATCAAGATCAAGACCA 21  
||||||||||||||||||||  
Sbjct: 578 ACGACTAGTTCTAGTTCTGGT 558

>miR3712 Score: 0.0 R03G\_11403  
Query: 1 TGCTGATCAAGATCAAGACCA 21  
||||||||||||||||||||  
Sbjct: 578 ACGACTAGTTCTAGTTCTGGT 558

>miR3712 Score: 0.0 R03G\_10555  
Query: 1 TGCTGATCAAGATCAAGACCA 21  
||||||||||||||||||||  
Sbjct: 578 ACGACTAGTTCTAGTTCTGGT 558

>miR3712 Score: 0.0 R03G\_10560  
Query: 1 TGCTGATCAAGATCAAGACCA 21  
||||||||||||||||||||  
Sbjct: 578 ACGACTAGTTCTAGTTCTGGT 558

>miR3712 Score: 2.5 R03G\_10759  
Query: 1 TGCTGATCAAGATCAAGACCA 21  
||||\*|||||||:|\*\*|  
Sbjct: 518 ACGACAAGTTCTAGTTTT-TT 499

>miR3712 Score: 0.0 R03G\_09376

Query: 1 TGCTGATCAAGATCAAGACCA 21  
|||||  
Sbjct: 578 ACGACTAGTTCTAGTTCTGGT 558  
>miR3712 Score: 0.0 R03G\_08612  
Query: 1 TGCTGATCAAGATCAAGACCA 21  
|||||  
Sbjct: 578 ACGACTAGTTCTAGTTCTGGT 558  
>miR3712 Score: 0.0 R03G\_07104  
Query: 1 TGCTGATCAAGATCAAGACCA 21  
|||||  
Sbjct: 578 ACGACTAGTTCTAGTTCTGGT 558  
>miR3712 Score: 0.0 R03G\_07305  
Query: 1 TGCTGATCAAGATCAAGACCA 21  
|||||  
Sbjct: 578 ACGACTAGTTCTAGTTCTGGT 558  
>miR3712 Score: 0.0 R03G\_05630  
Query: 1 TGCTGATCAAGATCAAGACCA 21  
|||||  
Sbjct: 578 ACGACTAGTTCTAGTTCTGGT 558  
>miR3712 Score: 0.0 R03G\_06416  
Query: 1 TGCTGATCAAGATCAAGACCA 21  
|||||  
Sbjct: 578 ACGACTAGTTCTAGTTCTGGT 558  
>miR3712 Score: 0.0 R03G\_05280  
Query: 1 TGCTGATCAAGATCAAGACCA 21  
|||||  
Sbjct: 578 ACGACTAGTTCTAGTTCTGGT 558  
>miR3712 Score: 2.5 R03G\_05369  
\*:|||||\*|\*\*  
Sbjct: 335 TTGACTAGTTCTAGTTC-GAA 316  
>miR3712 Score: 0.5 R03G\_03103  
Query: 1 TGCTGATCAAGATCAAGACCA 21  
|||||\*||  
Sbjct: 578 ACGACTAGTTCTAGTTCTAGT 558  
>miR3712 Score: 2.0 R03G\_03330  
Query: 1 TGCTGATCAAGATCAAGACCA 21  
\*|||||\*|\*\*  
Sbjct: 1586 CCGACTAGTTCTAGTTC-GAA 1567  
>miR3712 Score: 0.0 R03G\_03988  
Query: 1 TGCTGATCAAGATCAAGACCA 21  
|||||  
Sbjct: 578 ACGACTAGTTCTAGTTCTGGT 558  
>miR3712 Score: 0.0 R03G\_01203  
Query: 1 TGCTGATCAAGATCAAGACCA 21

|||||  
Sbjct: 578 ACGACTAGTTCTAGTTCTGGT 558  
>miR3712 Score: 0.0 R03G\_01718  
Query: 1 TGCTGATCAAGATCAAGACCA 21  
|||||  
Sbjct: 578 ACGACTAGTTCTAGTTCTGGT 558  
>miR5225a Score: 0.0 R03G\_17239  
Query: 1 TCTTGTTGAAGGTAAATGGTGC 22  
|||||  
Sbjct: 722 AGAACAACTTCCATTTACCACG 701  
>miR5225a Score: 2.2 R03G\_17204  
Query: 1 TCTTGTTGAAGGTAAATGG-TGC 22  
|||||:|\*|\*|  
Sbjct: 596 AGAACAACTTTTATTTATCGAAG 574  
>miR5225a Score: 2.2 R03G\_16905  
Query: 1 TCTTGTTGAAGGTAAATGG-TGC 22  
|||||:|\*|\*|  
Sbjct: 533 AGAACAACTTTTATTTATCGAAG 511  
>miR5225a Score: 2.2 R03G\_14987  
Query: 1 TCTTGTTGAAGGTAAATGG-TGC 22  
|||||:|\*|\*|  
Sbjct: 380 AGAACAACTTTTATTTATCGAAG 358  
>miR5225a Score: 2.2 R03G\_14989  
Query: 1 TCTTGTTGAAGGTAAATGG-TGC 22  
|||||:|\*|\*|  
Sbjct: 572 AGAACAACTTTTATTTATCGAAG 550  
>miR5225a Score: 0.0 R03G\_15168  
Query: 1 TCTTGTTGAAGGTAAATGGTGC 22  
|||||  
Sbjct: 506 AGAACAACTTCCATTTACCACG 485  
>miR5225a Score: 2.5 R03G\_14757  
Query: 1 TCTTGTTGAAGGTAAATGGTGC 22  
\*|||||\*|\*|\*|\*  
Sbjct: 681 TGAACAACTTCCATTT-CGACA 661  
>miR5225a Score: 2.2 R03G\_13857  
Query: 1 TCTTGTTGAAGGTAAATGG-TGC 22  
|||||:|\*|\*|  
Sbjct: 356 AGAACAACTTTTATTTATCGAAG 334  
>miR5225a Score: 2.2 R03G\_13276  
Query: 1 TCTTGTTGAAGGTAAATGG-TGC 22  
|||||:|\*|\*|  
Sbjct: 98 AGAACAACTTTTATTTATCGAAG 76  
>miR5225a Score: 2.2 R03G\_12186  
Query: 1 TCTTGTTGAAGGTAAATGG-TGC 22  
|||||:|\*|\*|

Sbjct: 725 AGAACAACTTTTATTTATCGAAG 703  
>miR5225a Score: 2.2 R03G\_12196  
Query: 1 TCTTGTTGAAGGTAAATGG-TGC 22  
|||||||:::|||||:|\*|\*|

Sbjct: 647 AGAACAACTTTTATTTATCGAAG 625  
>miR5225a Score: 2.2 R03G\_12525  
Query: 1 TCTTGTTGAAGGTAAATGG-TGC 22  
|||||||:::|||||:|\*|\*|

Sbjct: 647 AGAACAACTTTTATTTATCGAAG 625  
>miR5225a Score: 0.0 R03G\_10799  
Query: 1 TCTTGTTGAAGGTAAATGGTGC 22  
|||||||

Sbjct: 722 AGAACAACTTCCATTTACCACG 701  
>miR5225a Score: 2.2 R03G\_09955  
Query: 1 TCTTGTTGAAGGTAAATGG-TGC 22  
|||||||:::|||||:|\*|\*|

Sbjct: 410 AGAACAACTTTTATTTATCGAAG 388  
>miR5225a Score: 2.2 R03G\_07024  
Query: 1 TCTTGTTGAAGGTAAATGG-TGC 22  
|||||||:::|||||:|\*|\*|

Sbjct: 725 AGAACAACTTTTATTTATCGAAG 703  
>miR5225a Score: 2.2 R03G\_07121  
Query: 1 TCTTGTTGAAGGTAAATGG-TGC 22  
|||||||:::|||||:|\*|\*|

Sbjct: 725 AGAACAACTTTTATTTATCGAAG 703  
>miR5225a Score: 0.0 R03G\_04664  
Query: 1 TCTTGTTGAAGGTAAATGGTGC 22  
|||||||

Sbjct: 722 AGAACAACTTCCATTTACCACG 701  
>miR5225a Score: 2.2 R03G\_02700  
Query: 1 TCTTGTTGAAGGTAAATGG-TGC 22  
|||||||:::|||||:|\*|\*|

Sbjct: 410 AGAACAACTTTTATTTATCGAAG 388  
>miR5225a Score: 2.5 R03G\_02961  
Query: 1 TCTTGTTGAAGGTAAATGG-TGC 22  
:|||||||:::|||||:|\*|\*|

Sbjct: 203 GGAACAACTTTTATTTATCGAAG 181  
>miR5225a Score: 2.2 R03G\_03570  
Query: 1 TCTTGTTGAAGGTAAATGG-TGC 22  
|||||||:::|||||:|\*|\*|

Sbjct: 410 AGAACAACTTTTATTTATCGAAG 388  
>miR5225a Score: 0.5 R03G\_03573  
Query: 1 TCTTGTTGAAGGTAAATGGTGC 22  
|||||||

Sbjct: 722 AGAACAACTTCCATTTGCCACG 701

>miR5225a Score: 2.2 R03G\_03599  
Query: 1 TCTTGTTGAAGGTAAATGG-TGC 22  
|||||||:|||||:|\*|\*|  
Sbjct: 725 AGAACAACTTTTATTTATCGAAG 703

>miR5225a Score: 2.5 R03G\_03612  
Query: 1 TCTTGTTGAAGGTAAATGG-TGC 22  
:|||||||:|||||:|\*|\*|  
Sbjct: 203 GGAACAACTTTTATTTATCGAAG 181

>miR5225a Score: 2.2 R03G\_00690  
Query: 1 TCTTGTTGAAGGTAAATGG-TGC 22  
|||||||:|||||:|\*|\*|  
Sbjct: 665 AGAACAACTTTTATTTATCGAAG 643

>miR5225a Score: 0.0 R03G\_01327  
Query: 1 TCTTGTTGAAGGTAAATGGTGC 22  
|||||||:|||||:|\*|\*|  
Sbjct: 722 AGAACAACTTCCATTTACCACG 701

>miR5225a Score: 2.2 R03G\_01925  
Query: 1 TCTTGTTGAAGGTAAATGG-TGC 22  
|||||||:|||||:|\*|\*|  
Sbjct: 725 AGAACAACTTTTATTTATCGAAG 703

>miR5225a Score: 2.5 R03G\_17361  
Query: 1 TCTTGTTGAAGGTAAATGGTGC 22  
|||||||:|||||:|\*:\*|  
Sbjct: 293 AGAACAACTTTTATTTATC-TA 273

>miR163 Score: 0.5 R03G\_17241  
Query: 1 TTGAAGAGCAGCATGGAATTCGT 23  
||||||:|||||||  
Sbjct: 192 AACTTCTTGTCGTACCTTAAGCA 170

>miR163 Score: 2.0 R03G\_16486  
Query: 1 TTGAAGAGCAGCATGGAATTCGT 23  
:|||||||\*||||\*|:|||  
Sbjct: 2430 GACTTCTCGTCGGACCTCAGGCA 2408

>miR163 Score: 0.5 R03G\_16127  
Query: 1 TTGAAGAGCAGCATGGAATTCGT 23  
||||||:|||||||  
Sbjct: 873 AACTTCTTGTCGTACCTTAAGCA 851

>miR163 Score: 0.5 R03G\_15256  
Query: 1 TTGAAGAGCAGCATGGAATTCGT 23  
||||||:|||||||  
Sbjct: 873 AACTTCTTGTCGTACCTTAAGCA 851

>miR163 Score: 0.5 R03G\_13711  
Query: 1 TTGAAGAGCAGCATGGAATTCGT 23  
||||||:|||||||  
Sbjct: 858 AACTTCTTGTCGTACCTTAAGCA 836

>miR163 Score: 0.0 R03G\_13072







Sbjct: 2542 AACCTATCCTAAACCAG-GA 2524  
>miR2873b Score: 2.2 R03G\_12378  
Query: 1 TTGGATTGGATTTGGTTATT 20  
:||||:||||:|||||\*\*|  
Sbjct: 456 GACCTGACCTGAACCAACTA 437  
>miR2873b Score: 2.5 R03G\_11821  
Query: 1 TTGGATTGGATTTGGTTATT 20  
|||:||||\*|||||\*|||  
Sbjct: 197 AACTTAACGTAAACCCATAA 178  
>miR2873b Score: 2.5 R03G\_11891  
Query: 1 TTGGATTGGATTTGGTTATT 20  
|||:|||||||:|||:|\*\*|  
Sbjct: 1062 AACTTAACCTAGACCGAGTA 1043  
>miR2873b Score: 2.5 R03G\_11007  
Query: 1 TTGGATTGGATTTGGTTATT 20  
|||:||||:|||||:|\*||  
Sbjct: 1734 AACTTAACCTAAACTAG-AA 1716  
>miR2873b Score: 2.0 R03G\_06774  
Query: 1 TTGGATTGGATTTGGTTAT-T 20  
|||||||\*||||||\*|\*|  
Sbjct: 130 AACCTAACCCAAACCAACATA 110  
>miR2873b Score: 2.0 R03G\_07209  
Query: 1 TTGGATTGGATTTGGTTATT 20  
|||||||\*|||\*||\*||  
Sbjct: 38 AACCTAACCTAAAGCGAGAA 19  
>miR2873b Score: 2.5 R03G\_07290  
Query: 1 TTGGATTGGATTTGGTTATT 20  
|||||\*|||||||\*||\*  
Sbjct: 1590 AACCTACCCTAAACCA-TAT 1572  
>miR2873b Score: 2.5 R03G\_07770  
Query: 1 TTGGATTGGATTTGGTTATT 20  
|||||||:|||:|:|\*||  
Sbjct: 736 AACCTAACTTAAGCTGACAA 717  
>miR2873b Score: 2.5 R03G\_05780  
Query: 1 TTGGATTGGATTTGGTTATT 20  
|||||||:||:|:|\*|\*  
Sbjct: 1593 AACCTAACTTAGACTAA-AC 1575  
>miR2873b Score: 2.0 R03G\_05999  
Query: 1 TTGGATTGGATTTGGTTATT 20  
|||||||:||||||:|\*||  
Sbjct: 764 AACCTAACTTAAACCGG-AA 746  
>miR2873b Score: 2.5 R03G\_04315  
Query: 1 TTGGATTGGATTTGGTTATT 20  
|:|:||||:|:|\*||  
Sbjct: 492 AGCTTAACCTTAGACCAA-AA 474



Query: 1 TGAATTGTTGGGATTGTACTT 21  
|||||  
Sbjct: 1059 ACTTAACAACCCTAACATGAA 1039  
>miR2678 Score: 2.2 R03G\_08781  
Query: 1 TGAATTGTTGGGATTGTAC-TT 21  
|||||:|\*|\*|  
Sbjct: 2794 ACTTAACAACCTTAACAAGTGA 2773  
>miR2678 Score: 2.5 R03G\_08782  
Query: 1 TGAATTGTTGGGATTGTACTT 21  
\*|||||\*|||||\*||  
Sbjct: 208 TCTTAACAAACCTAACAAAAA 188  
>miR2678 Score: 2.5 R03G\_06760  
Query: 1 TGAATTGTTGGGATTGTACTT 21  
||\*|||||:|\*||  
Sbjct: 162 ACATAACAACCCTAATAACAA 142  
>miR2678 Score: 2.5 R03G\_05796  
Query: 1 TGAATTGTTGGGATTGTACTT 21  
|||||\*|\*||\*||  
Sbjct: 1485 ACTTAACAACATTAACA-GAT 1466  
>miR2678 Score: 2.5 R03G\_03140  
Query: 1 TGAATTGTTGGGATTGTACTT 21  
|||||:|\*||||:|\*||  
Sbjct: 348 ACTTAATAAGCCTAATATTAA 328  
>miR5291a Score: 2.5 R03G\_10995  
Query: 1 TGTTTGTAGATGGATGGATGAT 22  
|\*|||||:|||||\*||\*|  
Sbjct: 191 AGAAACATTTACCTACC-ACAA 171  
>miR157a-3p Score: 2.5 R03G\_12815  
Query: 1 GCTCTCTAGCCTTCTGTCAT 20  
||\*|||||\*||\*||  
Sbjct: 597 CGATAGATCGGAAAACATTA 578  
>miR157a-3p Score: 2.5 R03G\_05078  
Query: 1 GCTCTCTAGCCTTCTGTCAT 20  
|||||:|||||\*|\*|  
Sbjct: 68 CGAGAGGTCGGAAGAAGGAA 49  
>miR858a Score: 2.5 R03G\_11732  
Query: 1 TTCGTTGTCTGTTCGACCTT 20  
|||:|\*||||:||||  
Sbjct: 2669 AAGTGACAAACAAGTTGGAA 2650  
>miR858a Score: 2.5 R03G\_10552  
Query: 1 TTCGTTGTCTGTTCGACCTT 20  
|||:|||||\*|\*||  
Sbjct: 753 AAGTAACAGAAGAGCTGTAA 734  
>miR6269 Score: 0.0 R03G\_13221  
Query: 1 TGCTGCAAGTGATTAGCCATGG 22

```
|||||
Sbjct: 881 ACGACGTTCACTAATCGGTACC 860
>miR6269 Score: 2.0 R03G_13224
Query: 1 TGCTGCAAGTGATTAGCCATGG 22
||*|||||*|||||
Sbjct: 881 ACAACGTTACCAATCGGTACC 860
>miR6269 Score: 2.0 R03G_04120
Query: 1 TGCTGCAAGTGATTAGCCATGG 22
||*|||||*|||||
Sbjct: 881 ACAACGTTACCAATCGGTACC 860
>miR6269 Score: 1.0 R03G_04123
Query: 1 TGCTGCAAGTGATTAGCCATGG 22
|||||*|||||
Sbjct: 881 ACGACGTTACCAATCGGTACC 860
>miR6269 Score: 2.0 R03G_17093
Query: 1 TGCTGCAAGTGATTAGCCATGG 22
||*|||||*|||||
Sbjct: 641 ACAACGTTACCAATCGGTACC 620
>miR6156 Score: 2.5 R03G_16582
Query: 1 TTGAAGAAGTTCTTTGTTTCGT 21
*|||||*:*:||||*||
Sbjct: 685 CACTTCTTCAACGAACAA-CA 666
>miR6156 Score: 2.0 R03G_13795
Query: 1 TTGAAGAAGTTCTTTGTTTCGT 21
|*|||||*||*
Sbjct: 1087 ATCTTCTTCAAGAAACA-GCC 1068
>miR6156 Score: 2.5 R03G_12847
Query: 1 TTGAAGAAGTTCTTTGTTTCGT 21
|::||||*:*:|||||
Sbjct: 589 AGTTTCTCTAAGAAACAAGCA 569
>miR403-3p Score: 2.5 R03G_02749
Query: 1 TTAGATTCACGCACAAACTC 20
*:*:|||||*|||||*|
Sbjct: 536 CGTCTAAGTGGGTGTTTGTG 517
>miR403-3p Score: 2.5 R03G_03878
Query: 1 TTAGATTCACGCACAAACTC 20
|||:|||||*|||||*|
Sbjct: 275 AATTTAAGTGCTTGTTTATG 256
>miR5244 Score: 2.2 R03G_12564
Query: 1 TTCTCTTGAAGTAGTTGTTGGT 22
||*|||||:|||||*|:|
Sbjct: 570 AAAAGAACTTTATCAACACCTA 549
>miR5244 Score: 0.0 R03G_10142
Query: 1 TTCTCTTGAAGTAGTTGTTGGT 22
|||||
```

Sbjct: 359 AAGAGAACTTCATCAACAACCA 338  
>miR5244 Score: 2.5 R03G\_02474  
Query: 1 TTCTCTTGAAGTAGTTGTTGGT 22  
|||\*|||\*||||||\*|||  
Sbjct: 102 AAGAAAACCTCCATCAACATCCA 81  
>miR5244 Score: 0.0 R03G\_03107  
Query: 1 TTCTCTTGAAGTAGTTGTTGGT 22  
|||||||  
Sbjct: 359 AAGAGAACTTCATCAACAACCA 338  
>miR5244 Score: 2.5 R03G\_01005  
Query: 1 TTCTCTTGAAGTAGTTGTTGGT 22  
|||||||\*||||||:|::\*|  
Sbjct: 193 AAGAGAACGTCATCAATAGTAA 172  
>miR5244 Score: 2.5 R03G\_01078  
Query: 1 TTCTCTTGAAGTAGTTGTTGGT 22  
|||||||::|\*|||\*||  
Sbjct: 228 AAGAGAACTTTGTCCACAAACA 207  
>miR2611 Score: 2.5 R03G\_15192  
Query: 1 TATTTTCAGTGTTGTGGTAGAA 22  
:||||||:|:||||||:|\*\*  
Sbjct: 849 GTAAAAGTTATAACACCGTCGC 828  
>miR6464 Score: 1.2 R03G\_17253  
Query: 1 TGTTTGCTTGTTGATGTTGAT 21  
::|||||||:||||  
Sbjct: 625 GTAAACGAACAACACTACGACTA 605  
>miR6464 Score: 0.0 R03G\_17255  
Query: 1 TGTTTGCTTGTTGATGTTGAT 21  
|||||||  
Sbjct: 625 ACAACGAACAACACTACAACACTA 605  
>miR6464 Score: 1.0 R03G\_17218  
Query: 1 TGTTTGCTTGTTGATGTTGAT 21  
|:|:|||||||  
Sbjct: 625 ATAAGCGAACAACACTACAACACTA 605  
>miR6464 Score: 2.0 R03G\_17083  
Query: 1 TGTTTGCTTGTTGATGTTGAT 21  
\*||||\*|||||||\*|  
Sbjct: 173 CCAAACAACAACACTACAACGA 153  
>miR6464 Score: 0.8 R03G\_16366  
Query: 1 TGTTTGCTTGTTGATGTTGAT 21  
::|||||||  
Sbjct: 625 GTAAACGAACAACACTACAACACTA 605  
>miR6464 Score: 2.5 R03G\_15299  
Query: 1 TGTTTGCTTGTTGATGTTGAT 21  
||\*\*|||||||\*|  
Sbjct: 952 ACCTACGAACAACACTACAAC-A 933

>miR6464 Score: 2.0 R03G\_14450  
Query: 1 TGTTTGCTTGTTGATGTT-GAT 21  
|||||||:|||||||\*|||  
Sbjct: 63 ACAACGAGTAACTACATTCTA 42

>miR6464 Score: 0.8 R03G\_13448  
Query: 1 TGTTTGCTTGTTGATGTTGAT 21  
::|||||||  
Sbjct: 625 GTAAACGAACAACTACAACATA 605

>miR6464 Score: 0.8 R03G\_11979  
Query: 1 TGTTTGCTTGTTGATGTTGAT 21  
::|||||||  
Sbjct: 609 GTAAACGAACAACTACAACATA 589

>miR6464 Score: 1.8 R03G\_12315  
Query: 1 TGTTTGCTTGTTGATGTTGAT 21  
|||||||:|||||:|\*:||  
Sbjct: 2538 ACAACGAATAACTATATTTA 2518

>miR6464 Score: 0.5 R03G\_10532  
Query: 1 TGTTTGCTTGTTGATGTTGAT 21  
|:|||||||  
Sbjct: 625 ATAAACGAACAACTACAACATA 605

>miR6464 Score: 1.5 R03G\_10539  
Query: 1 TGTTTGCTTGTTGATGTTGAT 21  
|:|||||||\*|||  
Sbjct: 739 ATAAACGAACAACCACAACATA 719

>miR6464 Score: 0.8 R03G\_10543  
Query: 1 TGTTTGCTTGTTGATGTTGAT 21  
::|||||||  
Sbjct: 97 GTAAACGAACAACTACAACATA 77

>miR6464 Score: 1.0 R03G\_10744  
Query: 1 TGTTTGCTTGTTGATGTTGAT 21  
|:|||||||:|||||||  
Sbjct: 625 ATAAACGAACGACTACAACATA 605

>miR6464 Score: 0.5 R03G\_10747  
Query: 1 TGTTTGCTTGTTGATGTTGAT 21  
|:|||||||  
Sbjct: 739 ATAAACGAACAACTACAACATA 719

>miR6464 Score: 2.2 R03G\_09582  
Query: 1 TGTTTGCTTGTTGATGTTGAT 21  
:\*|||:|||||||\*|  
Sbjct: 106 GAAAATGAACAACTACAACAAA 86

>miR6464 Score: 2.5 R03G\_08583  
Query: 1 TGTTTGCTTGTTGATGTTGAT 21  
||||\*||\*|:|||||||  
Sbjct: 3479 ACAAAGATCGACTACAACATA 3459

>miR6464 Score: 2.5 R03G\_08623







Sbjct: 367 AACCTAGTAATAGTACGACTTTCA 344  
>miR5512a Score: 2.5 R03G\_14981  
Query: 1 TAGGATCATTGTCATGCT-AAAAT 23  
|\*|||||||:||||||\*|||\*|

Sbjct: 367 AACCTAGTAATAGTACGACTTTCA 344  
>miR5512a Score: 2.5 R03G\_15145  
Query: 1 TAGGATCATTGTCATGCT-AAAAT 23  
|\*|||||||:||||||\*|||\*|

Sbjct: 367 AACCTAGTAATAGTACGACTTTCA 344  
>miR5512a Score: 2.5 R03G\_15170  
Query: 1 TAGGATCATTGTCATGCT-AAAAT 23  
|\*|||||||:||||||\*|||\*|

Sbjct: 367 AACCTAGTAATAGTACGACTTTCA 344  
>miR5512a Score: 2.5 R03G\_14784  
Query: 1 TAGGATCATTGTCATGCT-AAAAT 23  
|\*|||||||:||||||\*|||\*|

Sbjct: 367 AACCTAGTAATAGTACGACTTTCA 344  
>miR5512a Score: 2.5 R03G\_13752  
Query: 1 TAGGATCATTGTCATGCT-AAAAT 23  
|\*|||||||:||||||\*|||\*|

Sbjct: 367 AACCTAGTAATAGTACGACTTTCA 344  
>miR5512a Score: 0.5 R03G\_13852  
Query: 1 TAGGATCATTGTCATGCTAAAAT 23  
|||||||\*|||

Sbjct: 484 ATCCTAGTAACAGTACGACTTTA 462  
>miR5512a Score: 2.5 R03G\_12950  
Query: 1 TAGGATCATTGTCATGCT-AAAAT 23  
|\*|||||||:||||||\*|||\*|

Sbjct: 367 AACCTAGTAATAGTACGACTTTCA 344  
>miR5512a Score: 2.5 R03G\_13267  
Query: 1 TAGGATCATTGTCATGCT-AAAAT 23  
|\*|||||||:||||||\*|||\*|

Sbjct: 367 AACCTAGTAATAGTACGACTTTCA 344  
>miR5512a Score: 2.5 R03G\_12084  
Query: 1 TAGGATCATTGTCATGCT-AAAAT 23  
|\*|||||||:||||||\*|||\*|

Sbjct: 367 AACCTAGTAATAGTACGACTTTCA 344  
>miR5512a Score: 2.5 R03G\_11533  
Query: 1 TAGGATCATTGTCATGCT-AAAAT 23  
|\*|||||||:||||||\*|||\*|

Sbjct: 367 AACCTAGTAATAGTACGACTTTCA 344  
>miR5512a Score: 2.5 R03G\_11536  
Query: 1 TAGGATCATTGTCATGCT-AAAAT 23  
|\*|||||||:||||||\*|||\*|

Sbjct: 367 AACCTAGTAATAGTACGACTTTCA 344

>miR5512a Score: 1.5 R03G\_10771  
Query: 1 TAGGATCATTGTCATGCTAAAAT 23  
|||||\*|\*|||  
Sbjct: 484 ATCCTAGTAACAGTACAACCTTTA 462

>miR5512a Score: 2.5 R03G\_10785  
Query: 1 TAGGATCATTGTCATGCT-AAAAT 23  
|\*|||:||||\*||\*|  
Sbjct: 367 AACCTAGTAATAGTACGACTTTCA 344

>miR5512a Score: 2.5 R03G\_10797  
Query: 1 TAGGATCATTGTCATGCT-AAAAT 23  
|\*|||:||||\*||\*|  
Sbjct: 367 AACCTAGTAATAGTACGACTTTCA 344

>miR5512a Score: 2.5 R03G\_09926  
Query: 1 TAGGATCATTGTCATGCT-AAAAT 23  
|\*|||:||||\*||\*|  
Sbjct: 367 AACCTAGTAATAGTACGACTTTCA 344

>miR5512a Score: 2.5 R03G\_10050  
Query: 1 TAGGATCATTGTCATGCT-AAAAT 23  
|\*|||:||||\*||\*|  
Sbjct: 367 AACCTAGTAATAGTACGACTTTCA 344

>miR5512a Score: 2.5 R03G\_07136  
Query: 1 TAGGATCATTGTCATGCT-AAAAT 23  
|\*|||:||||\*||\*|  
Sbjct: 58 AACCTAGTAATAGTACGACTTTCA 35

>miR5512a Score: 2.5 R03G\_07723  
Query: 1 TAGGATCATTGTCATGCT-AAAAT 23  
|\*|||:||||\*||\*|  
Sbjct: 367 AACCTAGTAATAGTACGACTTTCA 344

>miR5512a Score: 1.5 R03G\_07739  
Query: 1 TAGGATCATTGTCATGCTAAAAT 23  
|||||\*|\*|||  
Sbjct: 484 ATCCTAGTAAGAGTACGACTTTA 462

>miR5512a Score: 2.5 R03G\_05522  
Query: 1 TAGGATCATTGTCATGCT-AAAAT 23  
|\*|||:||||\*||\*|  
Sbjct: 733 AACCTAGTAATAGTACGACTTTCA 710

>miR5512a Score: 2.5 R03G\_05516  
Query: 1 TAGGATCATTGTCATGCT-AAAAT 23  
|\*|||:||||\*||\*|  
Sbjct: 367 AACCTAGTAATAGTACGACTTTCA 344

>miR5512a Score: 2.5 R03G\_02844  
Query: 1 TAGGATCATTGTCATGCTAAAAT 23  
|\*|||\*||\*|  
Sbjct: 520 ACCCTAGTAACAGTACGACCTTC 498

>miR5512a Score: 2.5 R03G\_03112

Query: 1 TAGGATCATTGTCATGCT-AAAAT 23  
|\*|||||||:||||||\*|||\*|  
Sbjct: 733 AACCTAGTAATAGTACGACTTTCA 710  
>miR5512a Score: 2.5 R03G\_03560

Query: 1 TAGGATCATTGTCATGCT-AAAAT 23  
|\*|||||||:||||||\*|||\*|  
Sbjct: 367 AACCTAGTAATAGTACGACTTTCA 344  
>miR5512a Score: 2.5 R03G\_03791

Query: 1 TAGGATCATTGTCATGCT-AAAAT 23  
|\*|||||||:||||||\*|||\*|  
Sbjct: 367 AACCTAGTAATAGTACGACTTTCA 344  
>miR5512a Score: 2.0 R03G\_03797

Query: 1 TAGGATCATTGTCATGCT-AAAAT 23  
|||||||:||||\*|||\*|||||  
Sbjct: 232 ATCCTAGTGACAGCAGACTTTTA 209  
>miR5512a Score: 2.5 R03G\_00240

Query: 1 TAGGATCATTGTCATGCT-AAAAT 23  
|\*|||||||:||||||\*|||\*|  
Sbjct: 676 AACCTAGTAATAGTACGACTTTCA 653  
>miR5512a Score: 2.5 R03G\_00250

Query: 1 TAGGATCATTGTCATGCT-AAAAT 23  
|\*|||||||:||||||\*|||\*|  
Sbjct: 367 AACCTAGTAATAGTACGACTTTCA 344  
>miR5512a Score: 2.5 R03G\_00745

Query: 1 TAGGATCATTGTCATGCTAAAAT 23  
|||||||\*||\*|||\*|||  
Sbjct: 454 ATCCTAGTAACAGCACAACTTTA 432  
>miR5512a Score: 2.5 R03G\_01725

Query: 1 TAGGATCATTGTCATGCT-AAAAT 23  
|\*|||||||:||||||\*|||\*|  
Sbjct: 367 AACCTAGTAATAGTACGACTTTCA 344  
>miR5512a Score: 2.5 R03G\_02227

Query: 1 TAGGATCATTGTCATGCT-AAAAT 23  
|\*|||||||:||||||\*|||\*|  
Sbjct: 733 AACCTAGTAATAGTACGACTTTCA 710  
>miR5512a Score: 2.5 R03G\_17423

Query: 1 TAGGATCATTGTCATGCT-AAAAT 23  
|\*|||||||:||||||\*|||\*|  
Sbjct: 367 AACCTAGTAATAGTACGACTTTCA 344  
>miR5512a Score: 2.5 R03G\_17328

Query: 1 TAGGATCATTGTCATGCT-AAAAT 23  
|\*|||||||:||||||\*|||\*|  
Sbjct: 367 AACCTAGTAATAGTACGACTTTCA 344  
>miR5512a Score: 2.5 R03G\_17092

Query: 1 TAGGATCATTGTCATGCT-AAAAT 23

|\*|||||:|||||\*||\*|  
Sbjct: 367 AACCTAGTAATAGTACGACTTTCA 344  
>miR894 Score: 2.5 R03G\_15221  
Query: 1 GTTTCACGTCGGGTTACAC 19  
|||||\*||||:||||\*|  
Sbjct: 910 CAAAGTTCAGCTTAAGTAG 892  
>miR894 Score: 2.5 R03G\_11316  
Query: 1 GTTTCACGTCGGGTTACAC 19  
|||:||||:||||||\*\*  
Sbjct: 1029 CAAGGTGTGGCCCAAGTCC 1011  
>miR894 Score: 2.5 R03G\_10759  
Query: 1 GTTTCACGTCGGGTTACAC 19  
\*|||||\*||:|:|||||  
Sbjct: 2182 GAAAGTGAAGTCTAAGTGG 2164  
>miR4385 Score: 1.8 R03G\_03357  
Query: 1 TAATGTTGTA AAAAAGGATTGGT 22  
:|||||:|||||||\*\*|  
Sbjct: 1927 GTTACAATATTTTTCCTAA-AA 1907  
>miR4385 Score: 2.5 R03G\_00371  
Query: 1 TAATGTTGTA AAAAAGGATTGGT 22  
|||||:|||||\*|||:|\*||||  
Sbjct: 663 ATTACGACATTATTCTT-ACCA 643  
>miR4385 Score: 2.5 R03G\_16946  
Query: 1 TAATGTTGTA AAAAAGGATTGGT 22  
|||||||\*||\*|:|||||  
Sbjct: 2325 ATTACAACATCTTCCTTAACCA 2304  
>miR5239 Score: 1.8 R03G\_16744  
Query: 1 TGGGAGAAAACATAGGTG 18  
\*|\*|||||||:|  
Sbjct: 2998 TCGCTCTTTTGTATCCAT 2981  
>miR5239 Score: 1.8 R03G\_16686  
Query: 1 TGGGAGAAAACATAGGTG 18  
\*|\*|||||||:|  
Sbjct: 2839 TCGCTCTTTTGTATCCAT 2822  
>miR5239 Score: 2.2 R03G\_15947  
Query: 1 TGGGAGAAAACATAGGTG 18  
|:||||\*|||||||:|  
Sbjct: 904 ATCCTCGTTTGTATCCGT 887  
>miR5239 Score: 2.2 R03G\_15659  
Query: 1 TGGGAGAAAACATAGGTG 18  
|\*||||\*|||||||:|  
Sbjct: 856 AACCTCGTTTGTATCCAT 839  
>miR5239 Score: 1.8 R03G\_15869  
Query: 1 TGGGAGAAAACATAGGTG 18  
\*|\*|||||||:|

Sbjct: 2998 TCGCTCTTTTGTATCCAT 2981  
>miR5239 Score: 1.8 R03G\_14704  
Query: 1 TGGGAGAAAACATAGGTG 18  
\*|\*|||||||||||||:  
Sbjct: 2839 TCGCTCTTTTGTATCCAT 2822  
>miR5239 Score: 1.8 R03G\_13450  
Query: 1 TGGGAGAAAACATAGGTG 18  
\*|\*|||||||||||||:  
Sbjct: 2656 TCGCTCTTTTGTATCCAT 2639  
>miR5239 Score: 1.8 R03G\_13859  
Query: 1 TGGGAGAAAACATAGGTG 18  
\*|\*|||||||||||||:  
Sbjct: 2623 TCGCTCTTTTGTATCCAT 2606  
>miR5239 Score: 1.8 R03G\_12951  
Query: 1 TGGGAGAAAACATAGGTG 18  
\*|\*|||||||||||||:  
Sbjct: 2839 TCGCTCTTTTGTATCCAT 2822  
>miR5239 Score: 1.8 R03G\_12979  
Query: 1 TGGGAGAAAACATAGGTG 18  
\*|\*|||||||||||||:  
Sbjct: 2839 TCGCTCTTTTGTATCCAT 2822  
>miR5239 Score: 1.8 R03G\_13152  
Query: 1 TGGGAGAAAACATAGGTG 18  
\*|\*|||||||||||||:  
Sbjct: 2839 TCGCTCTTTTGTATCCAT 2822  
>miR5239 Score: 1.8 R03G\_11970  
Query: 1 TGGGAGAAAACATAGGTG 18  
\*|\*|||||||||||||:  
Sbjct: 2539 TCGCTCTTTTGTATCCAT 2522  
>miR5239 Score: 2.5 R03G\_11987  
Query: 1 TGGGAGAAAACATAGGTG 18  
||:||||\*||||:||||\*  
Sbjct: 428 ACTCTCTCTTGTGTCCAG 411  
>miR5239 Score: 1.8 R03G\_12087  
Query: 1 TGGGAGAAAACATAGGTG 18  
\*|\*|||||||||||||:  
Sbjct: 2839 TCGCTCTTTTGTATCCAT 2822  
>miR5239 Score: 1.8 R03G\_11275  
Query: 1 TGGGAGAAAACATAGGTG 18  
\*|\*|||||||||||||:  
Sbjct: 2998 TCGCTCTTTTGTATCCAT 2981  
>miR5239 Score: 1.8 R03G\_11403  
Query: 1 TGGGAGAAAACATAGGTG 18  
\*|\*|||||||||||||:  
Sbjct: 2998 TCGCTCTTTTGTATCCAT 2981

>miR5239 Score: 1.8 R03G\_11785  
Query: 1 TGGGAGAAAACATAGGTG 18  
\*|\*|||||||||||||||:  
Sbjct: 1159 TCGCTCTTTTGTATCCAT 1142

>miR5239 Score: 1.8 R03G\_10555  
Query: 1 TGGGAGAAAACATAGGTG 18  
\*|\*|||||||||||||||:  
Sbjct: 2839 TCGCTCTTTTGTATCCAT 2822

>miR5239 Score: 1.8 R03G\_10560  
Query: 1 TGGGAGAAAACATAGGTG 18  
\*|\*|||||||||||||||:  
Sbjct: 2998 TCGCTCTTTTGTATCCAT 2981

>miR5239 Score: 1.8 R03G\_09376  
Query: 1 TGGGAGAAAACATAGGTG 18  
\*|\*|||||||||||||||:  
Sbjct: 2877 TCGCTCTTTTGTATCCAT 2860

>miR5239 Score: 1.8 R03G\_08612  
Query: 1 TGGGAGAAAACATAGGTG 18  
\*|\*|||||||||||||||:  
Sbjct: 2839 TCGCTCTTTTGTATCCAT 2822

>miR5239 Score: 1.8 R03G\_08968  
Query: 1 TGGGAGAAAACATAGGTG 18  
\*|\*|||||||||||||||:  
Sbjct: 553 TCGCTCTTTTGTATCCAT 536

>miR5239 Score: 1.8 R03G\_07305  
Query: 1 TGGGAGAAAACATAGGTG 18  
\*|\*|||||||||||||||:  
Sbjct: 2839 TCGCTCTTTTGTATCCAT 2822

>miR5239 Score: 1.8 R03G\_05630  
Query: 1 TGGGAGAAAACATAGGTG 18  
\*|\*|||||||||||||||:  
Sbjct: 2758 TCGCTCTTTTGTATCCAT 2741

>miR5239 Score: 1.8 R03G\_06416  
Query: 1 TGGGAGAAAACATAGGTG 18  
\*|\*|||||||||||||||:  
Sbjct: 2998 TCGCTCTTTTGTATCCAT 2981

>miR5239 Score: 1.8 R03G\_05280  
Query: 1 TGGGAGAAAACATAGGTG 18  
\*|\*|||||||||||||||:  
Sbjct: 2839 TCGCTCTTTTGTATCCAT 2822

>miR5239 Score: 1.8 R03G\_02235  
Query: 1 TGGGAGAAAACATAGGTG 18  
\*|\*|||||||||||||||:  
Sbjct: 2182 TCGCTCTTTTGTATCCAT 2165

>miR5239 Score: 1.8 R03G\_03103





|||||:||||  
Sbjct: 262 AACATTTTCGATGACTTCGGACG 241  
>miR5252 Score: 2.2 R03G\_16901  
Query: 1 TTGTAAAGCTACTGAAGTCTGC 22  
||||\*|||||\*:||||  
Sbjct: 232 AACACTTCGATGACTTAGGACG 211  
>miR5252 Score: 2.2 R03G\_16917  
Query: 1 TTGTAAAGCTACTGAAGTCTGC 22  
||||\*|||||\*:||||  
Sbjct: 238 AACACTTCGATGACTTAGGACG 217  
>miR5252 Score: 0.2 R03G\_16743  
Query: 1 TTGTAAAGCTACTGAAGTCTGC 22  
|||||:||||  
Sbjct: 184 AACATTTTCGATGACTTCGGACG 163  
>miR5252 Score: 0.2 R03G\_16369  
Query: 1 TTGTAAAGCTACTGAAGTCTGC 22  
|||||:||||  
Sbjct: 217 AACATTTTCGATGACTTCGGACG 196  
>miR5252 Score: 0.2 R03G\_15887  
Query: 1 TTGTAAAGCTACTGAAGTCTGC 22  
|||||:||||  
Sbjct: 262 AACATTTTCGATGACTTCGGACG 241  
>miR5252 Score: 0.2 R03G\_14553  
Query: 1 TTGTAAAGCTACTGAAGTCTGC 22  
|||||:||||  
Sbjct: 238 AACATTTTCGATGACTTCGGACG 217  
>miR5252 Score: 0.2 R03G\_13452  
Query: 1 TTGTAAAGCTACTGAAGTCTGC 22  
|||||:||||  
Sbjct: 214 AACATTTTCGATGACTTCGGACG 193  
>miR5252 Score: 0.0 R03G\_12976  
Query: 1 TTGTAAAGCTACTGAAGTCTGC 22  
|||||:||||  
Sbjct: 241 AACATTTTCGATGACTTCAGACG 220  
>miR5252 Score: 0.2 R03G\_12011  
Query: 1 TTGTAAAGCTACTGAAGTCTGC 22  
|||||:||||  
Sbjct: 238 AACATTTTCGATGACTTCGGACG 217  
>miR5252 Score: 0.2 R03G\_11543  
Query: 1 TTGTAAAGCTACTGAAGTCTGC 22  
|||||:||||  
Sbjct: 238 AACATTTTCGATGACTTCGGACG 217  
>miR5252 Score: 0.2 R03G\_10043  
Query: 1 TTGTAAAGCTACTGAAGTCTGC 22  
|||||:||||

Sbjct: 232 AACATTTTCGATGACTTCGGACG 211  
>miR5252 Score: 0.2 R03G\_07692  
Query: 1 TTGTAAAGCTACTGAAGTCTGC 22  
|||||:||||  
Sbjct: 172 AACATTTTCGATGACTTCGGACG 151  
>miR5252 Score: 0.2 R03G\_05906  
Query: 1 TTGTAAAGCTACTGAAGTCTGC 22  
|||||:||||  
Sbjct: 175 AACATTTTCGATGACTTCGGACG 154  
>miR5252 Score: 0.2 R03G\_04659  
Query: 1 TTGTAAAGCTACTGAAGTCTGC 22  
|||||:||||  
Sbjct: 172 AACATTTTCGATGACTTCGGACG 151  
>miR5252 Score: 0.2 R03G\_05347  
Query: 1 TTGTAAAGCTACTGAAGTCTGC 22  
|||||:||||  
Sbjct: 238 AACATTTTCGATGACTTCGGACG 217  
>miR5252 Score: 0.2 R03G\_02817  
Query: 1 TTGTAAAGCTACTGAAGTCTGC 22  
|||||:||||  
Sbjct: 241 AACATTTTCGATGACTTCGGACG 220  
>miR5252 Score: 0.2 R03G\_01192  
Query: 1 TTGTAAAGCTACTGAAGTCTGC 22  
|||||:||||  
Sbjct: 175 AACATTTTCGATGACTTCGGACG 154  
>miR5252 Score: 0.2 R03G\_01717  
Query: 1 TTGTAAAGCTACTGAAGTCTGC 22  
|||||:||||  
Sbjct: 241 AACATTTTCGATGACTTCGGACG 220  
>miR5252 Score: 0.2 R03G\_17460  
Query: 1 TTGTAAAGCTACTGAAGTCTGC 22  
|||||:||||  
Sbjct: 262 AACATTTTCGATGACTTCGGACG 241  
>miR5252 Score: 0.2 R03G\_17433  
Query: 1 TTGTAAAGCTACTGAAGTCTGC 22  
|||||:||||  
Sbjct: 235 AACATTTTCGATGACTTCGGACG 214  
>miR400 Score: 2.5 R03G\_02756  
Query: 1 TATGAGAGTATTATAAGTCA 20  
\*||||\*|||||\*  
Sbjct: 129 CTAATATCATAATATTC-TT 111  
>miR400 Score: 2.5 R03G\_01140  
Query: 1 TATGAGAGTATTATAAGTCA 20  
||||:|\*:|||||\*  
Sbjct: 519 ATACTTTAGTAATATTCAGC 500

>miR5072 Score: 2.5 R03G\_16128  
Query: 1 CGTTCCCAGCAGAGTCG-CC 20  
\*|:|||||||\*|||||\*||  
Sbjct: 542 CCGAGGGGTCGACTCAGCTGG 522

>miR5072 Score: 2.5 R03G\_14559  
Query: 1 CGTTCCCAGCAGAGTCG-CC 20  
\*|:|||||||\*|||||\*||  
Sbjct: 770 CCGAGGGGTCGACTCAGCTGG 750

>miR5072 Score: 2.5 R03G\_13712  
Query: 1 CGTTCCCAGCAGAGTCG-CC 20  
\*|:|||||||\*|||||\*||  
Sbjct: 542 CCGAGGGGTCGACTCAGCTGG 522

>miR5072 Score: 2.5 R03G\_12968  
Query: 1 CGTTCCCAGCAGAGTCG-CC 20  
\*|:|||||||\*|||||\*||  
Sbjct: 542 CCGAGGGGTCGACTCAGCTGG 522

>miR5072 Score: 2.5 R03G\_12185  
Query: 1 CGTTCCCAGCAGAGTCG-CC 20  
\*|:|||||||\*|||||\*||  
Sbjct: 770 CCGAGGGGTCGACTCAGCTGG 750

>miR5072 Score: 2.5 R03G\_10047  
Query: 1 CGTTCCCAGCAGAGTCG-CC 20  
\*|:|||||||\*|||||\*||  
Sbjct: 542 CCGAGGGGTCGACTCAGCTGG 522

>miR5072 Score: 2.5 R03G\_09185  
Query: 1 CGTTCCCAGCAGAGTCG-CC 20  
\*|:|||||||\*|||||\*||  
Sbjct: 770 CCGAGGGGTCGACTCAGCTGG 750

>miR5072 Score: 2.5 R03G\_05911  
Query: 1 CGTTCCCAGCAGAGTCG-CC 20  
\*|:|||||||\*|||||\*||  
Sbjct: 395 CCGAGGGGTCGACTCAGCTGG 375

>miR5072 Score: 2.5 R03G\_05954  
Query: 1 CGTTCCCAGCAGAGTCG-CC 20  
\*|:|||||||\*|||||\*||  
Sbjct: 542 CCGAGGGGTCGACTCAGCTGG 522

>miR5072 Score: 2.5 R03G\_02232  
Query: 1 CGTTCCCAGCAGAGTCG-CC 20  
\*|:|||||||\*|||||\*||  
Sbjct: 477 CCGAGGGGTCGACTCAGCTGG 457

>miR5072 Score: 2.5 R03G\_00260  
Query: 1 CGTTCCCAGCAGAGTCG-CC 20  
\*|:|||||||\*|||||\*||  
Sbjct: 542 CCGAGGGGTCGACTCAGCTGG 522

>miR5072 Score: 2.5 R03G\_01199

Query: 1 CGTTCCCAGCAGAGTCG-CC 20  
\*|:|||||||\*|||||\*||  
Sbjct: 542 CCGAGGGGTCGACTCAGCTGG 522  
>miR5072 Score: 2.5 R03G\_17434  
Query: 1 CGTTCCCAGCAGAGTCG-CC 20  
\*|:|||||||\*|||||\*||  
Sbjct: 542 CCGAGGGGTCGACTCAGCTGG 522  
>miR1108 Score: 0.8 R03G\_16906  
Query: 1 TAAGCTGGAAACATAACG-CCC 21  
|||||||:\*\*\*||  
Sbjct: 228 ATTCGACCTTTGTATTGTAGGG 207  
>miR1108 Score: 0.8 R03G\_13723  
Query: 1 TAAGCTGGAAACATAACG-CCC 21  
|||||||:\*\*\*||  
Sbjct: 1059 ATTCGACCTTTGTATTGTAGGG 1038  
>miR1108 Score: 0.0 R03G\_10822  
Query: 1 TAAGCTGGAAACATAACGCC 21  
|||||||  
Sbjct: 1113 ATTCGACCTTTGTATTGCGGG 1093  
>miR1108 Score: 1.2 R03G\_01682  
Query: 1 TAAGCTGGAAACATAACGCC 21  
||||\*|||||||:|||  
Sbjct: 1005 ATTCAACCTTTGTATTGTGGG 985  
>miR5207 Score: 2.2 R03G\_04584  
Query: 1 TTAAGGAGGTTTTGGATGGCGA 22  
|||\*|||||||\*||:|  
Sbjct: 422 AATACCTCCAAAACCTAGAGTT 401  
>miR5658 Score: 0.0 R03G\_16744  
Query: 1 TGATGATGATGATGTTGCAGAA 22  
|||||||  
Sbjct: 3663 ACTACTACTACTACAACGTCTT 3642  
>miR5658 Score: 0.0 R03G\_16686  
Query: 1 TGATGATGATGATGTTGCAGAA 22  
|||||||  
Sbjct: 3504 ACTACTACTACTACAACGTCTT 3483  
>miR5658 Score: 1.5 R03G\_15960  
Query: 1 TGATGATGATGATGTTGCAGAA 22  
|||||||\*|\*\*  
Sbjct: 1625 ACTACTACTACTACAACGACAA 1604  
>miR5658 Score: 0.0 R03G\_15869  
Query: 1 TGATGATGATGATGTTGCAGAA 22  
|||||||  
Sbjct: 3663 ACTACTACTACTACAACGTCTT 3642  
>miR5658 Score: 0.0 R03G\_14704  
Query: 1 TGATGATGATGATGTTGCAGAA 22

|||||  
Sbjct: 3504 ACTACTACTACTACAACGTCTT 3483  
>miR5658 Score: 1.2 R03G\_14198  
Query: 1 TGATGATGATGATGTTGCAGAA 22  
|||||\*:\*||  
Sbjct: 50 ACTACTACTACTACAACCATTT 29  
>miR5658 Score: 2.5 R03G\_13341  
Query: 1 TGATGATGATGATGTTGCAGAA 22  
|||||\*||\*||\*  
Sbjct: 635 ACTACTACTACTACTACTG 614  
>miR5658 Score: 0.0 R03G\_13450  
Query: 1 TGATGATGATGATGTTGCAGAA 22  
|||||  
Sbjct: 3321 ACTACTACTACTACAACGTCTT 3300  
>miR5658 Score: 0.0 R03G\_13859  
Query: 1 TGATGATGATGATGTTGCAGAA 22  
|||||  
Sbjct: 3288 ACTACTACTACTACAACGTCTT 3267  
>miR5658 Score: 0.0 R03G\_12979  
Query: 1 TGATGATGATGATGTTGCAGAA 22  
|||||  
Sbjct: 3504 ACTACTACTACTACAACGTCTT 3483  
>miR5658 Score: 0.0 R03G\_13152  
Query: 1 TGATGATGATGATGTTGCAGAA 22  
|||||  
Sbjct: 3504 ACTACTACTACTACAACGTCTT 3483  
>miR5658 Score: 0.0 R03G\_12087  
Query: 1 TGATGATGATGATGTTGCAGAA 22  
|||||  
Sbjct: 3504 ACTACTACTACTACAACGTCTT 3483  
>miR5658 Score: 0.0 R03G\_12193  
Query: 1 TGATGATGATGATGTTGCAGAA 22  
|||||  
Sbjct: 510 ACTACTACTACTACAACGTCTT 489  
>miR5658 Score: 0.0 R03G\_11275  
Query: 1 TGATGATGATGATGTTGCAGAA 22  
|||||  
Sbjct: 3663 ACTACTACTACTACAACGTCTT 3642  
>miR5658 Score: 0.0 R03G\_11403  
Query: 1 TGATGATGATGATGTTGCAGAA 22  
|||||  
Sbjct: 3663 ACTACTACTACTACAACGTCTT 3642  
>miR5658 Score: 0.0 R03G\_10555  
Query: 1 TGATGATGATGATGTTGCAGAA 22  
|||||

Sbjct: 3504 ACTACTACTACTACAACGTCTT 3483  
>miR5658 Score: 0.0 R03G\_10560  
Query: 1 TGATGATGATGATGTTGCAGAA 22  
|||||

Sbjct: 3663 ACTACTACTACTACAACGTCTT 3642  
>miR5658 Score: 0.0 R03G\_08612  
Query: 1 TGATGATGATGATGTTGCAGAA 22  
|||||

Sbjct: 3504 ACTACTACTACTACAACGTCTT 3483  
>miR5658 Score: 0.0 R03G\_07305  
Query: 1 TGATGATGATGATGTTGCAGAA 22  
|||||

Sbjct: 3504 ACTACTACTACTACAACGTCTT 3483  
>miR5658 Score: 2.5 R03G\_07545  
Query: 1 TGATGATGATGATGTTGCAGAA 22  
\*|||||\*||\*||\*|

Sbjct: 468 CCTACTACTACTACTACCTCGT 447  
>miR5658 Score: 2.5 R03G\_07768  
Query: 1 TGATGATGATGATGTTGCAGAA 22  
|:|||||:||||\*||\*|||

Sbjct: 881 ATTACTATTACTAAAAC-TCTT 861  
>miR5658 Score: 0.0 R03G\_05630  
Query: 1 TGATGATGATGATGTTGCAGAA 22  
|||||

Sbjct: 3423 ACTACTACTACTACAACGTCTT 3402  
>miR5658 Score: 0.0 R03G\_06416  
Query: 1 TGATGATGATGATGTTGCAGAA 22  
|||||

Sbjct: 3663 ACTACTACTACTACAACGTCTT 3642  
>miR5658 Score: 2.0 R03G\_06536  
Query: 1 TGATGATGATGATGTTGCAGAA 22  
|||||\*\*|\*\*

Sbjct: 416 ACTACTACTACTACAACAACAA 395  
>miR5658 Score: 2.5 R03G\_06611  
Query: 1 TGATGATGATGATGTTGCAGAA 22  
|||||\*||\*\*|\*|

Sbjct: 459 ACTACTACTACTACCACACCGT 438  
>miR5658 Score: 2.5 R03G\_05207  
Query: 1 TGATGATGATGATGTTGCAGAA 22  
|||||\*||\*\*|\*|

Sbjct: 956 ACTACTACTACTACTACTG 935  
>miR5658 Score: 0.0 R03G\_05280  
Query: 1 TGATGATGATGATGTTGCAGAA 22  
|||||

Sbjct: 3504 ACTACTACTACTACAACGTCTT 3483

>miR5658 Score: 0.0 R03G\_02235  
Query: 1 TGATGATGATGATGTTGCAGAA 22  
|||||  
Sbjct: 2847 ACTACTACTACTACAACGTCTT 2826

>miR5658 Score: 2.5 R03G\_03011  
Query: 1 TGATGATGATGATGTTGCAGAA 22  
|||||\*||\*\*||\*  
Sbjct: 401 ACTACTACTACTACTGCTG 380

>miR5658 Score: 2.5 R03G\_03075  
Query: 1 TGATGATGATGATGTTGCAGAA 22  
|||||\*||\*\*||\*  
Sbjct: 1091 ACTACTACTACTACCACTACTA 1070

>miR5658 Score: 0.0 R03G\_03103  
Query: 1 TGATGATGATGATGTTGCAGAA 22  
|||||  
Sbjct: 3504 ACTACTACTACTACAACGTCTT 3483

>miR5658 Score: 2.5 R03G\_03827  
Query: 1 TGATGATGATGATGTTGCAGAA 22  
|||||\*||\*\*||\*  
Sbjct: 1085 ACTACTACTACTACTACTACTA 1064

>miR5658 Score: 2.5 R03G\_03866  
Query: 1 TGATGATGATGATGTTGCAGAA 22  
|||||\*|\*\*\*|  
Sbjct: 110 ACTACTACTACTACAA-GAAGT 90

>miR5658 Score: 0.0 R03G\_03990  
Query: 1 TGATGATGATGATGTTGCAGAA 22  
|||||  
Sbjct: 261 ACTACTACTACTACAACGTCTT 240

>miR5658 Score: 2.5 R03G\_04007  
Query: 1 TGATGATGATGATGTTGCAGAA 22  
|\*|||||:|\*||\*  
Sbjct: 1097 AATACTACTACTACGACGACTA 1076

>miR5658 Score: 2.5 R03G\_00266  
Query: 1 TGATGATGATGATGTTGCAGAA 22  
|||||\*||\*||\*\*  
Sbjct: 1226 ACTACTACTACTACTAC-TCCC 1206

>miR5658 Score: 2.5 R03G\_00272  
Query: 1 TGATGATGATGATGTTGCAGAA 22  
\*:|||||:|\*||\*  
Sbjct: 5961 TTTACTACTACTACGACCTCTA 5940

>miR5658 Score: 2.5 R03G\_00729  
Query: 1 TGATGATGATGATGTTGCAGAA 22  
|||||\*||\*\*||\*  
Sbjct: 1070 ACTACTACTACTACTACTACTA 1049

>miR5658 Score: 2.5 R03G\_00853

Query: 1 TGATGATGATGATGTTGCAGAA 22  
|||||||:|\*\*|\*\*  
Sbjct: 1100 ACTACTACTACTACGACAACAA 1079  
>miR5658 Score: 0.0 R03G\_01203  
Query: 1 TGATGATGATGATGTTGCAGAA 22  
|||||||  
Sbjct: 3663 ACTACTACTACTACAACGTCTT 3642  
>miR5658 Score: 2.0 R03G\_01410  
Query: 1 TGATGATGATGATGTTGCAGAA 22  
|||||||\*||\*||  
Sbjct: 462 ACTACTACTACTACTAC-TATT 442  
>miR5658 Score: 0.0 R03G\_01718  
Query: 1 TGATGATGATGATGTTGCAGAA 22  
|||||||  
Sbjct: 3663 ACTACTACTACTACAACGTCTT 3642  
>miR5658 Score: 2.0 R03G\_16962  
Query: 1 TGATGATGATGATGTTGCAGAA 22  
|||||||\*||\*||  
Sbjct: 410 ACTACTACTACTACTACCTGTT 389  
>miR8034 Score: 2.0 R03G\_16738  
Query: 1 TATGACAAGCCTGCACAAACT 21  
||||||\*||||\*||||  
Sbjct: 685 ATACTGTCCGGACATGTTTGA 665  
>miR8034 Score: 2.0 R03G\_16138  
Query: 1 TATGACAAGCCTGCACAAACT 21  
||||||\*||||\*||||  
Sbjct: 1768 ATACTGTCCGGACATGTTTGA 1748  
>miR8034 Score: 1.0 R03G\_15580  
Query: 1 TATGACAAGCCTGCACAAACT 21  
||||||\*||||\*||||  
Sbjct: 1732 ATACTGTCCGGACGTGTTTGA 1712  
>miR8034 Score: 2.0 R03G\_14626  
Query: 1 TATGACAAGCCTGCACAAACT 21  
||||||\*||||\*||||  
Sbjct: 1768 ATACTGTCCGGACATGTTTGA 1748  
>miR8034 Score: 2.0 R03G\_14710  
Query: 1 TATGACAAGCCTGCACAAACT 21  
||||||\*||||\*||||  
Sbjct: 1768 ATACTGTCCGGACATGTTTGA 1748  
>miR8034 Score: 2.2 R03G\_13747  
Query: 1 TATGACAAGCCTGCACAAACT 21  
||||||\*||||\*||||:  
Sbjct: 1768 ATACTGTCCGGACATGTTTGG 1748  
>miR8034 Score: 2.0 R03G\_13148  
Query: 1 TATGACAAGCCTGCACAAACT 21



```
||||||*||||*|||||
Sbjct: 1501 ATACTGTCCGGACATGTTTGA 1481
>miR8034 Score: 2.2 R03G_12009
Query: 1 TATGACAAGCCTGCACAAACT 21
||||||*||||*|||||:
Sbjct: 1768 ATACTGTCCGGACATGTTTGG 1748
>miR8034 Score: 2.0 R03G_12072
Query: 1 TATGACAAGCCTGCACAAACT 21
||||||*||||*|||||
Sbjct: 1768 ATACTGTCCGGACATGTTTGA 1748
>miR8034 Score: 2.0 R03G_12169
Query: 1 TATGACAAGCCTGCACAAACT 21
||||||*||||*|||||
Sbjct: 1768 ATACTGTCCGGACATGTTTGA 1748
>miR8034 Score: 2.2 R03G_11404
Query: 1 TATGACAAGCCTGCACAAACT 21
||||||*||||*|||||:
Sbjct: 1768 ATACTGTCCGGACATGTTTGG 1748
>miR8034 Score: 1.0 R03G_11531
Query: 1 TATGACAAGCCTGCACAAACT 21
||||||*|||||||
Sbjct: 1261 ATACTGTCCGGACGTGTTTGA 1241
>miR8034 Score: 2.0 R03G_11771
Query: 1 TATGACAAGCCTGCACAAACT 21
||||||*||||*|||||
Sbjct: 1768 ATACTGTCCGGACATGTTTGA 1748
>miR8034 Score: 2.0 R03G_10522
Query: 1 TATGACAAGCCTGCACAAACT 21
||||||*||||*|||||
Sbjct: 1732 ATACTGTCCGGACATGTTTGA 1712
>miR8034 Score: 2.0 R03G_10725
Query: 1 TATGACAAGCCTGCACAAACT 21
||||||*||||*|||||
Sbjct: 1732 ATACTGTCCGGACATGTTTGA 1712
>miR8034 Score: 2.0 R03G_09940
Query: 1 TATGACAAGCCTGCACAAACT 21
||||||*||||*|||||
Sbjct: 1768 ATACTGTCCGGACATGTTTGA 1748
>miR8034 Score: 0.0 R03G_08042
Query: 1 TATGACAAGCCTGCACAAACT 21
|||||||
Sbjct: 1300 ATACTGTTCGGACGTGTTTGA 1280
>miR8034 Score: 2.0 R03G_07128
Query: 1 TATGACAAGCCTGCACAAACT 21
||||||*||||*|||||
```

Sbjct: 286 ATACTGTCCGGACATGTTTGA 266  
>miR8034 Score: 2.0 R03G\_07294  
Query: 1 TATGACAAGCCTGCACAAACT 21  
||||||\*||||\*||||||  
Sbjct: 1369 ATACTGTCCGGACATGTTTGA 1349  
>miR8034 Score: 2.0 R03G\_07686  
Query: 1 TATGACAAGCCTGCACAAACT 21  
||||||\*||||\*||||||  
Sbjct: 1768 ATACTGTCCGGACATGTTTGA 1748  
>miR8034 Score: 1.0 R03G\_07976  
Query: 1 TATGACAAGCCTGCACAAACT 21  
||||||\*||||\*||||||  
Sbjct: 1765 ATACTGTCCGGACATGTTTGA 1745  
>miR8034 Score: 2.0 R03G\_05958  
Query: 1 TATGACAAGCCTGCACAAACT 21  
||||||\*||||\*||||||  
Sbjct: 1732 ATACTGTCCGGACATGTTTGA 1712  
>miR8034 Score: 2.0 R03G\_06430  
Query: 1 TATGACAAGCCTGCACAAACT 21  
||||||\*||||\*||||||  
Sbjct: 1732 ATACTGTCCGGACATGTTTGA 1712  
>miR8034 Score: 2.0 R03G\_04785  
Query: 1 TATGACAAGCCTGCACAAACT 21  
||||||\*||||\*||||||  
Sbjct: 1732 ATACTGTCCGGACATGTTTGA 1712  
>miR8034 Score: 2.0 R03G\_03555  
Query: 1 TATGACAAGCCTGCACAAACT 21  
||||||\*||||\*||||||  
Sbjct: 1768 ATACTGTCCGGACATGTTTGA 1748  
>miR8034 Score: 1.0 R03G\_03580  
Query: 1 TATGACAAGCCTGCACAAACT 21  
||||||\*||||\*||||||  
Sbjct: 1693 ATACTGTCCGGACGTGTTTGA 1673  
>miR8034 Score: 1.0 R03G\_03589  
Query: 1 TATGACAAGCCTGCACAAACT 21  
||||||\*||||\*||||||  
Sbjct: 1693 ATACTGTCCGGACGTGTTTGA 1673  
>miR8034 Score: 2.0 R03G\_01309  
Query: 1 TATGACAAGCCTGCACAAACT 21  
||||||\*||||\*||||||  
Sbjct: 1717 ATACTGTCCGGACATGTTTGA 1697  
>miR8034 Score: 2.0 R03G\_01740  
Query: 1 TATGACAAGCCTGCACAAACT 21  
||||||\*||||\*||||||  
Sbjct: 1732 ATACTGTCCGGACATGTTTGA 1712

>miR8034 Score: 2.0 R03G\_01954  
Query: 1 TATGACAAGCCTGCACAAACT 21  
||||||\*||||\*||||||  
Sbjct: 718 ATACTGTCCGGACATGTTTGA 698

>miR8034 Score: 2.0 R03G\_17441  
Query: 1 TATGACAAGCCTGCACAAACT 21  
||||||\*||||\*||||||  
Sbjct: 1495 ATACTGTCCGGACATGTTTGA 1475

>miR8034 Score: 2.0 R03G\_17385  
Query: 1 TATGACAAGCCTGCACAAACT 21  
||||||\*||||\*||||||  
Sbjct: 1768 ATACTGTCCGGACATGTTTGA 1748

>miR8034 Score: 2.0 R03G\_17358  
Query: 1 TATGACAAGCCTGCACAAACT 21  
||||||\*||||\*||||||  
Sbjct: 1768 ATACTGTCCGGACATGTTTGA 1748

>miR5506 Score: 0.0 R03G\_16708  
Query: 1 TAGATCGCTTCGTTGAGG 18  
|||||||  
Sbjct: 677 ATCTAGCGAAGCAACTCC 660

>miR5506 Score: 0.0 R03G\_13745  
Query: 1 TAGATCGCTTCGTTGAGG 18  
|||||||  
Sbjct: 677 ATCTAGCGAAGCAACTCC 660

>miR5506 Score: 0.0 R03G\_12669  
Query: 1 TAGATCGCTTCGTTGAGG 18  
|||||||  
Sbjct: 677 ATCTAGCGAAGCAACTCC 660

>miR5506 Score: 0.2 R03G\_12961  
Query: 1 TAGATCGCTTCGTTGAGG 18  
|||||||:  
Sbjct: 1010 ATCTAGCGAAGCAACTCT 993

>miR5506 Score: 0.0 R03G\_12964  
Query: 1 TAGATCGCTTCGTTGAGG 18  
|||||||  
Sbjct: 677 ATCTAGCGAAGCAACTCC 660

>miR5506 Score: 0.0 R03G\_12075  
Query: 1 TAGATCGCTTCGTTGAGG 18  
|||||||  
Sbjct: 677 ATCTAGCGAAGCAACTCC 660

>miR5506 Score: 0.0 R03G\_11952  
Query: 1 TAGATCGCTTCGTTGAGG 18  
|||||||  
Sbjct: 1055 ATCTAGCGAAGCAACTCC 1038

>miR5506 Score: 0.5 R03G\_09927



|||||  
Sbjct: 261 ACGAAGAACGACAAGGTACTAAA 239  
>miR9752 Score: 0.0 R03G\_09934  
Query: 1 TGCTTCTTGCTGTTCCATGATTT 23  
|||||  
Sbjct: 261 ACGAAGAACGACAAGGTACTAAA 239  
>miR9752 Score: 0.0 R03G\_07109  
Query: 1 TGCTTCTTGCTGTTCCATGATTT 23  
|||||  
Sbjct: 261 ACGAAGAACGACAAGGTACTAAA 239  
>miR9752 Score: 0.0 R03G\_07672  
Query: 1 TGCTTCTTGCTGTTCCATGATTT 23  
|||||  
Sbjct: 261 ACGAAGAACGACAAGGTACTAAA 239  
>miR9752 Score: 2.5 R03G\_06295  
Query: 1 TGCTTCTTGCTGTTCCATGATTT 23  
|:|||||\*|||\*|||  
Sbjct: 2737 ATGAAGAACGAAAAGGGACTAAA 2715  
>miR9752 Score: 2.2 R03G\_04795  
Query: 1 TGCTTCTTGCTGTTCCA-TGATTT 23  
|||||\*|||\*|:||||  
Sbjct: 312 ACGAAGAACGAAAAGGTTATTAAA 289  
>miR9752 Score: 0.0 R03G\_02835  
Query: 1 TGCTTCTTGCTGTTCCATGATTT 23  
|||||  
Sbjct: 261 ACGAAGAACGACAAGGTACTAAA 239  
>miR9752 Score: 2.5 R03G\_00450  
Query: 1 TGCTTCTTGCTGTTCCATGATTT 23  
|||||\*|||\*||\*||  
Sbjct: 2446 ACGAAGAACGAAAAGGAACGAAA 2424  
>miR9752 Score: 0.0 R03G\_01312  
Query: 1 TGCTTCTTGCTGTTCCATGATTT 23  
|||||  
Sbjct: 42 ACGAAGAACGACAAGGTACTAAA 20  
>miR9752 Score: 0.0 R03G\_01935  
Query: 1 TGCTTCTTGCTGTTCCATGATTT 23  
|||||  
Sbjct: 261 ACGAAGAACGACAAGGTACTAAA 239  
>miR5369 Score: 2.5 R03G\_15932  
Query: 1 TCAAGAAAAGGAGGATGTCCAT 22  
|||||\*|||:|\*||\*  
Sbjct: 1706 AGTTCTTTTCATCCTATTGGTC 1685  
>miR5369 Score: 2.5 R03G\_09088  
Query: 1 TCAAGAAAAGGAGGATGTCCAT 22  
|\*|||||\*||\*||





Query: 1 TCCGTTCTGCTCGTTTCTCT 20  
|\*|:|||||||:|||||\*  
Sbjct: 1776 ACGTAAGACGAGCGAAGAGC 1757  
>miR9565-5p Score: 2.5 R03G\_00401  
Query: 1 TCCGTTCTGCTCGTTTCTCT 20  
|\*\*|||||||\*||  
Sbjct: 67 AACCAAGACGAGCAAAGTGA 48  
>miR398b-3p Score: 2.5 R03G\_04368  
Query: 1 ATGTGTTCTCAGGTCACCCCT 21  
|||||||:||||\*\*\*||  
Sbjct: 2694 TACACAAGAGTTCAGT-CAGA 2675  
>miR169f-3p Score: 2.5 R03G\_16614  
Query: 1 TGATGTCTTCCTTTGGTTACT 21  
:|||\*|||||||:\*\*\*||  
Sbjct: 154 GCTAAAGAAGGAAACCG-TGG 135  
>miR169f-3p Score: 2.0 R03G\_15960  
Query: 1 TGATGTCTTCCTTTGGTTACT 21  
|:||\*|||||||\*||  
Sbjct: 592 ATTAAAGAAGGAAACCAA-GA 573  
>miR169f-3p Score: 2.5 R03G\_15382  
Query: 1 TGATGTCTTCCTTTGGTTACT 21  
|||||||:|\*|||||||\*\*|  
Sbjct: 2320 ACTACAGGAAGAAACCAA-AA 2301  
>miR169f-3p Score: 2.5 R03G\_14833  
Query: 1 TGATGTCTTCCTTTGGTTACT 21  
|:|||||||\*||||||\*|\*|  
Sbjct: 538 ATTACAGAAGTAAACCACT-A 519  
>miR169f-3p Score: 2.2 R03G\_15222  
Query: 1 TGATGTCTTCCTTTGGTTACT 21  
|||||:|||||||:|\*|\*  
Sbjct: 1801 ACTACGGAAGGAAACTAG-GT 1782  
>miR169f-3p Score: 2.5 R03G\_09894  
Query: 1 TGATGTCTTCCTTTGGTT-ACT 21  
|:|:||||||\*||||||\*|||  
Sbjct: 1408 ATTGCAGAAGAAAACCAAGTGA 1387  
>miR6144 Score: 2.5 R03G\_14393  
Query: 1 TGCGCCACTTCTTCATCA-TC 20  
|||\*|\*|||||||\*||  
Sbjct: 23 ACGAGATGAAGAAGTAGTGAG 3  
>miR6144 Score: 2.5 R03G\_11938  
Query: 1 TGCGCCACTTCTTCATCATC 20  
\*|||||||\*||\*|\*  
Sbjct: 1247 TCGCGGTGAAGAAGAAG-AC 1229  
>miR6144 Score: 2.5 R03G\_09154  
Query: 1 TGCGCCACTTCTTCATCATC 20



```
|:*||||*|||||||
Sbjct: 374 ATACGGTTAAGAAGTAGTAG 355
>miR6144 Score: 2.0 R03G_07145
Query: 1 TGCGCCACTTCTTCATCATC 20
||||*|*|||||||
Sbjct: 149 ACGCGTTAAAGAAGTAGTAG 130
>miR6144 Score: 1.8 R03G_07923
Query: 1 TGCGCCACTTCTTCATCATC 20
:||||*|*||||||*||
Sbjct: 338 GCGCGTTAAGAAGTAGGAG 319
>miR6144 Score: 2.0 R03G_05534
Query: 1 TGCGCCACTTCTTCATCATC 20
|**|||||||
Sbjct: 3269 AGACGGTGAAGAAGTAGTAG 3250
>miR168 Score: 2.5 R03G_16003
Query: 1 TCGCTTGGTGCAGGTCGGGA 20
|*||||*|*||||||*
Sbjct: 2980 ATCGAACAAACGTCCAGCCCC 2961
>miR9558-3p Score: 0.0 R03G_15577
Query: 1 TTGCAAGGCCAGCTTTTCCTCT 22
|||||||
Sbjct: 318 AACGTTCCGGTCGAAAAGGAGA 297
>miR9558-3p Score: 0.0 R03G_14625
Query: 1 TTGCAAGGCCAGCTTTTCCTCT 22
|||||||
Sbjct: 318 AACGTTCCGGTCGAAAAGGAGA 297
>miR9558-3p Score: 0.0 R03G_13150
Query: 1 TTGCAAGGCCAGCTTTTCCTCT 22
|||||||
Sbjct: 39 AACGTTCCGGTCGAAAAGGAGA 18
>miR9558-3p Score: 0.0 R03G_11530
Query: 1 TTGCAAGGCCAGCTTTTCCTCT 22
|||||||
Sbjct: 318 AACGTTCCGGTCGAAAAGGAGA 297
>miR9558-3p Score: 0.0 R03G_10519
Query: 1 TTGCAAGGCCAGCTTTTCCTCT 22
|||||||
Sbjct: 318 AACGTTCCGGTCGAAAAGGAGA 297
>miR9558-3p Score: 2.5 R03G_08428
Query: 1 TTGCAAGGCCAGCTTTTCCTCT 22
|||||||**||||*|||
Sbjct: 318 AACGTTCCGAACGAAAAGAAGA 297
>miR9558-3p Score: 0.0 R03G_07107
Query: 1 TTGCAAGGCCAGCTTTTCCTCT 22
|||||||
```

Sbjct: 318 AACGTTCCGGTCGAAAAGGAGA 297  
>miR9558-3p Score: 0.0 R03G\_05957  
Query: 1 TTGCAAGGCCAGCTTTTCCTCT 22  
|||||  
Sbjct: 318 AACGTTCCGGTCGAAAAGGAGA 297  
>miR9558-3p Score: 0.0 R03G\_04783  
Query: 1 TTGCAAGGCCAGCTTTTCCTCT 22  
|||||  
Sbjct: 180 AACGTTCCGGTCGAAAAGGAGA 159  
>miR9558-3p Score: 2.0 R03G\_02685  
Query: 1 TTGCAAGGCCAGCTTTTCCTCT 22  
|||||\*|\*|  
Sbjct: 39 AACGTTCCGGACAAAAGGAGA 18  
>miR9558-3p Score: 0.0 R03G\_03097  
Query: 1 TTGCAAGGCCAGCTTTTCCTCT 22  
|||||  
Sbjct: 318 AACGTTCCGGTCGAAAAGGAGA 297  
>miR9558-3p Score: 0.0 R03G\_03579  
Query: 1 TTGCAAGGCCAGCTTTTCCTCT 22  
|||||  
Sbjct: 318 AACGTTCCGGTCGAAAAGGAGA 297  
>miR9558-3p Score: 2.0 R03G\_04093  
Query: 1 TTGCAAGGCCAGCTTTTCCTCT 22  
|||||:|\*||\*  
Sbjct: 1332 AACGTTCCGGTCGAGGAAGAGT 1311  
>miR9558-3p Score: 2.5 R03G\_00117  
Query: 1 TTGCAAGGCCAGCTTTTC-CTCT 22  
|||||\*|\*||\*||  
Sbjct: 115 AACGTTGCGGTCGAAAAGATCGA 93  
>miR9558-3p Score: 0.0 R03G\_01734  
Query: 1 TTGCAAGGCCAGCTTTTCCTCT 22  
|||||  
Sbjct: 318 AACGTTCCGGTCGAAAAGGAGA 297  
>miR9558-3p Score: 0.0 R03G\_17440  
Query: 1 TTGCAAGGCCAGCTTTTCCTCT 22  
|||||  
Sbjct: 318 AACGTTCCGGTCGAAAAGGAGA 297  
>miR6155 Score: 0.0 R03G\_14837  
Query: 1 TGAGTTGCCTGTGCCTTGCA 20  
|||||  
Sbjct: 38 ACTCAACGGACACGGAACGT 19  
>miR6155 Score: 0.0 R03G\_08656  
Query: 1 TGAGTTGCCTGTGCCTTGCA 20  
|||||  
Sbjct: 260 ACTCAACGGACACGGAACGT 241





```
||||||*||||||*|||
Sbjct: 129 ATGGTAGCAGAAGTATAGAAGT 108
>miR414 Score: 0.0 R03G_07712
Query: 1 TACCATCTTCTTCATATCGTCA 22
||||||
Sbjct: 129 ATGGTAGAAGAAGTATAGCAGT 108
>miR414 Score: 2.5 R03G_04919
Query: 1 TACCATCTTCTTCATATCGTCA 22
*||||||*|||**|
Sbjct: 1452 CTGGTAGAAGAAGTAAAGC-CT 1432
>miR414 Score: 0.0 R03G_04206
Query: 1 TACCATCTTCTTCATATCGTCA 22
||||||
Sbjct: 678 ATGGTAGAAGAAGTATAGCAGT 657
>miR169d Score: 0.0 R03G_16143
Query: 1 TTAGCAAGGATGAGATTACCGG 22
||||||
Sbjct: 1820 AATCGTTCCTACTCTAATGGCC 1799
>miR169d Score: 0.0 R03G_15135
Query: 1 TTAGCAAGGATGAGATTACCGG 22
||||||
Sbjct: 1823 AATCGTTCCTACTCTAATGGCC 1802
>miR169d Score: 0.0 R03G_12533
Query: 1 TTAGCAAGGATGAGATTACCGG 22
||||||
Sbjct: 1163 AATCGTTCCTACTCTAATGGCC 1142
>miR169d Score: 0.0 R03G_07028
Query: 1 TTAGCAAGGATGAGATTACCGG 22
||||||
Sbjct: 893 AATCGTTCCTACTCTAATGGCC 872
>miR169d Score: 0.0 R03G_06727
Query: 1 TTAGCAAGGATGAGATTACCGG 22
||||||
Sbjct: 1961 AATCGTTCCTACTCTAATGGCC 1940
>miR169d Score: 0.0 R03G_02691
Query: 1 TTAGCAAGGATGAGATTACCGG 22
||||||
Sbjct: 356 AATCGTTCCTACTCTAATGGCC 335
>miR169d Score: 0.0 R03G_04118
Query: 1 TTAGCAAGGATGAGATTACCGG 22
||||||
Sbjct: 1823 AATCGTTCCTACTCTAATGGCC 1802
>miR169d Score: 0.0 R03G_17384
Query: 1 TTAGCAAGGATGAGATTACCGG 22
||||||
```

Sbjct: 1823 AATCGTTCCTACTCTAATGGCC 1802  
>miR169d Score: 0.0 R03G\_17329  
Query: 1 TTAGCAAGGATGAGATTACCGG 22  
|||||  
Sbjct: 1160 AATCGTTCCTACTCTAATGGCC 1139  
>miR169d Score: 0.0 R03G\_17318  
Query: 1 TTAGCAAGGATGAGATTACCGG 22  
|||||  
Sbjct: 1823 AATCGTTCCTACTCTAATGGCC 1802  
>miR169d Score: 0.0 R03G\_17274  
Query: 1 TTAGCAAGGATGAGATTACCGG 22  
|||||  
Sbjct: 1823 AATCGTTCCTACTCTAATGGCC 1802  
>miR5499 Score: 2.5 R03G\_13849  
Query: 1 TACAGGAAGATCGTTTGGAA 20  
|\*\*|||||:|||||  
Sbjct: 438 ACATCCTTCTAGTAAACCTT 419  
>miR5499 Score: 2.0 R03G\_12682  
Query: 1 TACAGGAAGATCGTTTGGAA 20  
|||||:\*\*\*  
Sbjct: 429 ATGCCTTCTAGCAAATAAC 410  
>miR5499 Score: 2.5 R03G\_10420  
Query: 1 TACAGGAAGATCGTTTGGAA 20  
|\*\*|||||:|||||  
Sbjct: 438 ACATCCTTCTAGTAAACCTT 419  
>miR5499 Score: 2.5 R03G\_10965  
Query: 1 TACAGGAAGATCGTTTGGAA 20  
|\*\*|||||:|||||  
Sbjct: 438 ACATCCTTCTAGTAAACCTT 419  
>miR5499 Score: 0.0 R03G\_07991  
Query: 1 TACAGGAAGATCGTTTGGAA 20  
|||||  
Sbjct: 447 ATGCCTTCTAGCAAACCTT 428  
>miR5499 Score: 0.0 R03G\_07972  
Query: 1 TACAGGAAGATCGTTTGGAA 20  
|||||  
Sbjct: 447 ATGCCTTCTAGCAAACCTT 428  
>miR5499 Score: 2.5 R03G\_05865  
Query: 1 TACAGGAAGATCGTTTGGAA 20  
|\*\*|||||:|||||  
Sbjct: 438 ACATCCTTCTAGTAAACCTT 419  
>miR5499 Score: 2.2 R03G\_03352  
Query: 1 TACAGGAAGATCGTTTGGAA 20  
:|||:|||||\*||||\*|  
Sbjct: 361 GTGTTCTTCTAGGAAACCCT 342

>miR5499 Score: 2.2 R03G\_03677  
Query: 1 TACAGGAAGATCGTTTGGAA 20  
:|||||||:|:||||\*|\*  
Sbjct: 381 GTGTCCTTCTGGTAAAC-TA 363

>miR5499 Score: 2.5 R03G\_01733  
Query: 1 TACAGGAAGATCGTTTGGAA 20  
|\*\*|||||||:|||||||  
Sbjct: 438 ACATCCTTCTAGTAAACCTT 419

>miR5499 Score: 2.5 R03G\_01944  
Query: 1 TACAGGAAGATCGTTTGGAA 20  
|\*\*|||||||:|||||||  
Sbjct: 438 ACATCCTTCTAGTAAACCTT 419

>miR5499 Score: 2.5 R03G\_17446  
Query: 1 TACAGGAAGATCGTTTGGAA 20  
|\*\*|||||||:|||||||  
Sbjct: 438 ACATCCTTCTAGTAAACCTT 419

>miR5499 Score: 2.5 R03G\_17287  
Query: 1 TACAGGAAGATCGTTTGGAA 20  
|\*\*|||||||:|||||||  
Sbjct: 438 ACATCCTTCTAGTAAACCTT 419

>miR5679 Score: 1.0 R03G\_17260  
Query: 1 TTGGTGCAGAAGAAGTTAGA 20  
|||||||:|||||||\*||  
Sbjct: 1991 AACCACGTTTTCTTCAACCT 1972

>miR5679 Score: 0.0 R03G\_16392  
Query: 1 TTGGTGCAGAAGAAGTTAGA 20  
|||||||  
Sbjct: 961 AACCACGTCTTCTTCAATCT 942

>miR5679 Score: 2.0 R03G\_15766  
Query: 1 TTGGTGCAGAAGAAGTTAGA 20  
||:|:|||||||\*|||  
Sbjct: 1735 AATCATGTCTTCTTCA-TCT 1717

>miR5679 Score: 2.2 R03G\_15046  
Query: 1 TTGGTGCAGAAGAAGTTAGA 20  
:|||||||\*|||  
Sbjct: 100 GACCACGTCTTCTTCTTCT 81

>miR5679 Score: 2.5 R03G\_13244  
Query: 1 TTGGTGCAGAAGAAGTTAGA 20  
|||:|\*|:|||||||\*||  
Sbjct: 3965 AACTACTTTTCTTCAA-CT 3947

>miR5679 Score: 2.5 R03G\_10076  
Query: 1 TTGGTGCAGAAGAAGTTAGA 20  
|||:\*|||||||\*|||  
Sbjct: 652 AACTCCGTCTTCTTCA-TCT 634

>miR5679 Score: 2.5 R03G\_08276

Query: 1 TTGGTGCAGAAGAAGTTAGA 20  
|||||\*\*|||||||\*|  
Sbjct: 409 AACCACTACTTCTTCAAT-T 391  
>miR5679 Score: 1.0 R03G\_08382  
Query: 1 TTGGTGCAGAAGAAGTTAGA 20  
|||||||\*|||:|\*||  
Sbjct: 1078 AACCACTCTTCTTCGACCT 1059  
>miR161.1 Score: 1.0 R03G\_14986  
Query: 1 TGAAAGTGGCTCATCAAGGGGT 22  
|||||||\*|||||||  
Sbjct: 399 ACTTTCACCAAGTAGTTCCCCA 378  
>miR161.1 Score: 0.0 R03G\_13154  
Query: 1 TGAAAGTGGCTCATCAAGGGGT 22  
|||||||\*|||||||  
Sbjct: 399 ACTTTCACCGAGTAGTTCCCCA 378  
>miR161.1 Score: 1.0 R03G\_12187  
Query: 1 TGAAAGTGGCTCATCAAGGGGT 22  
|||||||\*|||||||  
Sbjct: 399 ACTTTCACCAAGTAGTTCCCCA 378  
>miR161.1 Score: 1.0 R03G\_07714  
Query: 1 TGAAAGTGGCTCATCAAGGGGT 22  
|||||||\*|||||||  
Sbjct: 222 ACTTTCACCAAGTAGTTCCCCA 201  
>miR161.1 Score: 1.0 R03G\_04693  
Query: 1 TGAAAGTGGCTCATCAAGGGGT 22  
|||||||\*|||||||  
Sbjct: 399 ACTTTCACCAAGTAGTTCCCCA 378  
>miR161.1 Score: 1.0 R03G\_05349  
Query: 1 TGAAAGTGGCTCATCAAGGGGT 22  
|||||||\*|||||||  
Sbjct: 399 ACTTTCACCAAGTAGTTCCCCA 378  
>miR161.1 Score: 0.0 R03G\_02823  
Query: 1 TGAAAGTGGCTCATCAAGGGGT 22  
|||||||\*|||||||  
Sbjct: 399 ACTTTCACCGAGTAGTTCCCCA 378  
>miR161.1 Score: 1.0 R03G\_03610  
Query: 1 TGAAAGTGGCTCATCAAGGGGT 22  
|||||||\*|||||||  
Sbjct: 377 ACTTTCACCAAGTAGTTCCCCA 356  
>miR161.1 Score: 1.0 R03G\_03622  
Query: 1 TGAAAGTGGCTCATCAAGGGGT 22  
|||||||\*|||||||  
Sbjct: 222 ACTTTCACCAAGTAGTTCCCCA 201  
>miR161.1 Score: 1.2 R03G\_04209  
Query: 1 TGAAAGTGGCTCATCAAGGGGT 22



|||||||\*|||||||:
Sbjct: 327 ACTTTCACCAAGTAGTTCCTCCCG 306
>miR164b-3p Score: 2.5 R03G\_14969
Query: 1 GCGCCCAGCTTCTCCACC 18
\*|||||\*||||\*|||
Sbjct: 623 GGCGGGTGAAGAAGTGG 606
>miR164b-3p Score: 2.0 R03G\_10474
Query: 1 GCGCCCAGCTTCTCCACC 18
\*||\*|||||||\*
Sbjct: 27 AGCTGGTGAAGAGGTGA 10
>miR164b-3p Score: 2.5 R03G\_01126
Query: 1 GCGCCCAGCTTCTCCACC 18
\*|||||\*||||\*|||
Sbjct: 623 GGCGGGTGAAGAAGTGG 606
>miR5246 Score: 0.0 R03G\_16540
Query: 1 TTGAGACAGCTTTGACTT 18
|||||||
Sbjct: 330 AACTCTGTCGAAACTGAA 313
>miR5246 Score: 1.0 R03G\_16144
Query: 1 TTGAGACAGCTTTGACTT 18
|||||||\*|||||
Sbjct: 867 AACTCTGTCAAAACTGAA 850
>miR5246 Score: 2.0 R03G\_16293
Query: 1 TTGAGACAGCTTTGACTT 18
||\*|||||||\*||
Sbjct: 1188 AAGTCTGTCGAAACTTAA 1171
>miR5246 Score: 2.0 R03G\_16067
Query: 1 TTGAGACAGCTTTGACTT 18
\*|||||||\*|||||\*
Sbjct: 1144 TACTCTGTCGTAAGTAT 1127
>miR5246 Score: 0.0 R03G\_16120
Query: 1 TTGAGACAGCTTTGACTT 18
|||||||
Sbjct: 330 AACTCTGTCGAAACTGAA 313
>miR5246 Score: 2.5 R03G\_14810
Query: 1 TTGAGACAGCTTTGACTT 18
||\*|||||\*|||||
Sbjct: 2541 AAATCTGTAAAAGTAA 2524
>miR5246 Score: 0.0 R03G\_14972
Query: 1 TTGAGACAGCTTTGACTT 18
|||||||
Sbjct: 798 AACTCTGTCGAAACTGAA 781
>miR5246 Score: 2.0 R03G\_15244
Query: 1 TTGAGACAGCTTTGACTT 18
||:|\*|||||:|||||

Sbjct: 622 AATTATGTCGGAAGTAA 605  
>miR5246 Score: 0.0 R03G\_13295  
Query: 1 TTGAGACAGCTTTGACTT 18  
|||||

Sbjct: 603 AACTCTGTCGAAAGTAA 586  
>miR5246 Score: 0.0 R03G\_13702  
Query: 1 TTGAGACAGCTTTGACTT 18  
|||||

Sbjct: 798 AACTCTGTCGAAAGTAA 781  
>miR5246 Score: 0.0 R03G\_13754  
Query: 1 TTGAGACAGCTTTGACTT 18  
|||||

Sbjct: 867 AACTCTGTCGAAAGTAA 850  
>miR5246 Score: 0.0 R03G\_12672  
Query: 1 TTGAGACAGCTTTGACTT 18  
|||||

Sbjct: 672 AACTCTGTCGAAAGTAA 655  
>miR5246 Score: 0.0 R03G\_13000  
Query: 1 TTGAGACAGCTTTGACTT 18  
|||||

Sbjct: 798 AACTCTGTCGAAAGTAA 781  
>miR5246 Score: 0.0 R03G\_13139  
Query: 1 TTGAGACAGCTTTGACTT 18  
|||||

Sbjct: 243 AACTCTGTCGAAAGTAA 226  
>miR5246 Score: 0.0 R03G\_12062  
Query: 1 TTGAGACAGCTTTGACTT 18  
|||||

Sbjct: 330 AACTCTGTCGAAAGTAA 313  
>miR5246 Score: 0.0 R03G\_12173  
Query: 1 TTGAGACAGCTTTGACTT 18  
|||||

Sbjct: 663 AACTCTGTCGAAAGTAA 646  
>miR5246 Score: 0.0 R03G\_12189  
Query: 1 TTGAGACAGCTTTGACTT 18  
|||||

Sbjct: 330 AACTCTGTCGAAAGTAA 313  
>miR5246 Score: 2.5 R03G\_11276  
Query: 1 TTGAGACAGCTTTGACTT 18  
|||||\*|:|::|

Sbjct: 235 AACTCTCTGAAGTTGAA 218  
>miR5246 Score: 2.5 R03G\_09214  
Query: 1 TTGAGACAGCTTTGACTT 18  
\*|||\*|||:||||:|

Sbjct: 25 CACTATGTTGAAATTGAA 8

>miR5246 Score: 0.0 R03G\_09485  
Query: 1 TTGAGACAGCTTTGACTT 18  
|||||  
Sbjct: 243 AACTCTGTCGAAACTGAA 226

>miR5246 Score: 0.0 R03G\_09487  
Query: 1 TTGAGACAGCTTTGACTT 18  
|||||  
Sbjct: 243 AACTCTGTCGAAACTGAA 226

>miR5246 Score: 0.0 R03G\_09598  
Query: 1 TTGAGACAGCTTTGACTT 18  
|||||  
Sbjct: 798 AACTCTGTCGAAACTGAA 781

>miR5246 Score: 2.2 R03G\_09763  
Query: 1 TTGAGACAGCTTTGACTT 18  
|||:|||||:|\*|:  
Sbjct: 645 AACTTTGTCGAAATTAAG 628

>miR5246 Score: 0.0 R03G\_09942  
Query: 1 TTGAGACAGCTTTGACTT 18  
|||||  
Sbjct: 243 AACTCTGTCGAAACTGAA 226

>miR5246 Score: 0.0 R03G\_10036  
Query: 1 TTGAGACAGCTTTGACTT 18  
|||||  
Sbjct: 243 AACTCTGTCGAAACTGAA 226

>miR5246 Score: 1.2 R03G\_08455  
Query: 1 TTGAGACAGCTTTGACTT 18  
|||||\*|:  
Sbjct: 779 AACTCTGTCGAAACTTAG 762

>miR5246 Score: 0.0 R03G\_06740  
Query: 1 TTGAGACAGCTTTGACTT 18  
|||||  
Sbjct: 798 AACTCTGTCGAAACTGAA 781

>miR5246 Score: 0.0 R03G\_07029  
Query: 1 TTGAGACAGCTTTGACTT 18  
|||||  
Sbjct: 243 AACTCTGTCGAAACTGAA 226

>miR5246 Score: 0.0 R03G\_07673  
Query: 1 TTGAGACAGCTTTGACTT 18  
|||||  
Sbjct: 867 AACTCTGTCGAAACTGAA 850

>miR5246 Score: 0.0 R03G\_05933  
Query: 1 TTGAGACAGCTTTGACTT 18  
|||||  
Sbjct: 243 AACTCTGTCGAAACTGAA 226

>miR5246 Score: 0.0 R03G\_05934

Query: 1 TTGAGACAGCTTTGACTT 18  
|||||  
Sbjct: 798 AACTCTGTCGAAACTGAA 781  
>miR5246 Score: 0.0 R03G\_06719  
Query: 1 TTGAGACAGCTTTGACTT 18  
|||||  
Sbjct: 798 AACTCTGTCGAAACTGAA 781  
>miR5246 Score: 2.0 R03G\_04477  
Query: 1 TTGAGACAGCTTTGACTT 18  
|||||\*\*|||  
Sbjct: 3261 AACTCTGTCGACTCTGAA 3244  
>miR5246 Score: 0.0 R03G\_04671  
Query: 1 TTGAGACAGCTTTGACTT 18  
|||||  
Sbjct: 744 AACTCTGTCGAAACTGAA 727  
>miR5246 Score: 0.0 R03G\_04694  
Query: 1 TTGAGACAGCTTTGACTT 18  
|||||  
Sbjct: 330 AACTCTGTCGAAACTGAA 313  
>miR5246 Score: 0.0 R03G\_03608  
Query: 1 TTGAGACAGCTTTGACTT 18  
|||||  
Sbjct: 330 AACTCTGTCGAAACTGAA 313  
>miR5246 Score: 0.0 R03G\_03989  
Query: 1 TTGAGACAGCTTTGACTT 18  
|||||  
Sbjct: 603 AACTCTGTCGAAACTGAA 586  
>miR5246 Score: 2.5 R03G\_04159  
Query: 1 TTGAGACAGCTTTGACTT 18  
|||\*|||\*|||  
Sbjct: 223 AACTATGTTTAAACTGAA 206  
>miR5246 Score: 0.0 R03G\_00252  
Query: 1 TTGAGACAGCTTTGACTT 18  
|||||  
Sbjct: 921 AACTCTGTCGAAACTGAA 904  
>miR5246 Score: 0.0 R03G\_01310  
Query: 1 TTGAGACAGCTTTGACTT 18  
|||||  
Sbjct: 603 AACTCTGTCGAAACTGAA 586  
>miR5246 Score: 0.0 R03G\_01710  
Query: 1 TTGAGACAGCTTTGACTT 18  
|||||  
Sbjct: 255 AACTCTGTCGAAACTGAA 238  
>miR5246 Score: 0.0 R03G\_01738  
Query: 1 TTGAGACAGCTTTGACTT 18

```

|||||
Sbjct: 798 AACTCTGTCGAAACTGAA 781
>miR5246 Score: 0.0 R03G_01938
Query: 1 TTGAGACAGCTTTGACTT 18
|||||
Sbjct: 867 AACTCTGTCGAAACTGAA 850
>miR5246 Score: 0.0 R03G_17463
Query: 1 TTGAGACAGCTTTGACTT 18
|||||
Sbjct: 243 AACTCTGTCGAAACTGAA 226
>miR5246 Score: 0.0 R03G_17461
Query: 1 TTGAGACAGCTTTGACTT 18
|||||
Sbjct: 330 AACTCTGTCGAAACTGAA 313
>miR1098 Score: 2.5 R03G_04797
Query: 1 TATGCGTTTTTGTCTGAAAT 20
*||:|*||||:|||||
Sbjct: 998 TTATGAAAAAGCAGACTTTA 979
>miR1098 Score: 2.5 R03G_04907
Query: 1 TATGCGTTTTTGTCTGAAAT 20
*||||:||||:||:|*
Sbjct: 45 CTACGCGAAAACGGATTTTT 26
>miR1098 Score: 2.5 R03G_00337
Query: 1 TATGCGTTTTTGTCTGAAAT 20
*||||:||||:||||*|
Sbjct: 593 CTACGTAAAAGTAGACTTCA 574
>miR1098 Score: 2.5 R03G_01119
Query: 1 TATGCGTTTTTGTCTGAAAT 20
*|||||||||:||:|*||
Sbjct: 908 TTACGCAAAAATAGATATTA 889
>miR8773 Score: 0.0 R03G_16542
Query: 1 TTGGATGCAATCGGTGGTTTAT 22
|||||
Sbjct: 494 AACCTACGTTAGCCACCAAATA 473
>miR2108a Score: 2.2 R03G_14827
Query: 1 TTAATTGTTCTTTTTGTCTGGG 21
:|||||:|||||||*::
Sbjct: 235 GATTAACGAGAAAAACAAGTT 215
>miR2108a Score: 2.5 R03G_13482
Query: 1 TTAATTGTTCTTTTTGTCTGGG 21
*||||*||||:||||:|:
Sbjct: 1559 TATTA AAAAGAAGAACAGTCT 1539
>miR2108a Score: 2.5 R03G_12768
Query: 1 TTAATTGTTCTTTTTGTCTGGG 21
*|||||*|||||||*|*

```

Sbjct: 1843 CATTAACCAGAAAAACAGGCG 1823  
>miR2108a Score: 2.5 R03G\_12445  
Query: 1 TTAATTGTTCTTTTTGTTCGGG 21  
|||\*|||\*|||||||\*  
Sbjct: 851 AATAAACTAGAAAAACAGCCA 831  
>miR2108a Score: 2.5 R03G\_09876  
Query: 1 TTAATTGTTCTTTTTGTTCGGG 21  
|:|||||:|||||||\*|\*\*  
Sbjct: 211 AGTTAACGAGAAAAACAACAA 191  
>miR2108a Score: 2.2 R03G\_08514  
Query: 1 TTAATTGTTCTTTTTGTTCGGG 21  
|||||||:|:|\*:\*  
Sbjct: 550 AATTAACAAGAAAGACGGGTA 530  
>miR2108a Score: 0.0 R03G\_07310  
Query: 1 TTAATTGTTCTTTTTGTTCGGG 21  
|||||||  
Sbjct: 169 AATTAACAAGAAAAACAGCCC 149  
>miR2108a Score: 0.0 R03G\_04805  
Query: 1 TTAATTGTTCTTTTTGTTCGGG 21  
|||||||  
Sbjct: 610 AATTAACAAGAAAAACAGCCC 590  
>miR2108a Score: 0.0 R03G\_05274  
Query: 1 TTAATTGTTCTTTTTGTTCGGG 21  
|||||||  
Sbjct: 610 AATTAACAAGAAAAACAGCCC 590  
>miR2108a Score: 0.0 R03G\_02841  
Query: 1 TTAATTGTTCTTTTTGTTCGGG 21  
|||||||  
Sbjct: 610 AATTAACAAGAAAAACAGCCC 590  
>miR2108a Score: 2.0 R03G\_02901  
Query: 1 TTAATTGTTCTTTTTGTTCG-GG 21  
:|||||\*|||||||\*::|  
Sbjct: 29 GATTAAAAAGAAAAACAGCATC 8  
>miR2108a Score: 0.0 R03G\_03790  
Query: 1 TTAATTGTTCTTTTTGTTCGGG 21  
|||||||  
Sbjct: 610 AATTAACAAGAAAAACAGCCC 590  
>miR2108a Score: 2.2 R03G\_00788  
Query: 1 TTAATTGTTCTTTTTGTTCGGG 21  
|||\*|||||||\*:::  
Sbjct: 1377 AATTCACAAGAAAAACATTTT 1357  
>miR2108a Score: 0.0 R03G\_17439  
Query: 1 TTAATTGTTCTTTTTGTTCGGG 21  
|||||||  
Sbjct: 610 AATTAACAAGAAAAACAGCCC 590

>miR5015 Score: 0.0 R03G\_16818  
Query: 1 TTGGTGATGTAGTAGTCTAC 20  
|||||  
Sbjct: 1403 AACCACTACATCATCAGATG 1384

>miR5015 Score: 0.0 R03G\_16797  
Query: 1 TTGGTGATGTAGTAGTCTAC 20  
|||||  
Sbjct: 662 AACCACTACATCATCAGATG 643

>miR5015 Score: 0.0 R03G\_16800  
Query: 1 TTGGTGATGTAGTAGTCTAC 20  
|||||  
Sbjct: 1661 AACCACTACATCATCAGATG 1642

>miR5015 Score: 2.0 R03G\_16183  
Query: 1 TTGGTGATGTAGTAGTCTAC 20  
|\*|||||\*|\*  
Sbjct: 19 ACCCACTACATCATCAG-TA 1

>miR5015 Score: 2.5 R03G\_16310  
Query: 1 TTGGTGATGTAGTAGTCT-AC 20  
|||:||||\*|||||\*||  
Sbjct: 514 AACTACTACTTCATCAGTCTG 494

>miR5015 Score: 2.0 R03G\_15674  
Query: 1 TTGGTGATGTAGTAGTCTAC 20  
|||||||:\*|||||\*||  
Sbjct: 713 AACCACTATTTTCATCAGCTG 694

>miR5015 Score: 0.0 R03G\_15265  
Query: 1 TTGGTGATGTAGTAGTCTAC 20  
|||||  
Sbjct: 1661 AACCACTACATCATCAGATG 1642

>miR5015 Score: 0.0 R03G\_15266  
Query: 1 TTGGTGATGTAGTAGTCTAC 20  
|||||  
Sbjct: 1661 AACCACTACATCATCAGATG 1642

>miR5015 Score: 0.0 R03G\_15268  
Query: 1 TTGGTGATGTAGTAGTCTAC 20  
|||||  
Sbjct: 1661 AACCACTACATCATCAGATG 1642

>miR5015 Score: 0.0 R03G\_14352  
Query: 1 TTGGTGATGTAGTAGTCTAC 20  
|||||  
Sbjct: 1661 AACCACTACATCATCAGATG 1642

>miR5015 Score: 2.0 R03G\_14624  
Query: 1 TTGGTGATGTAGTAGTCTAC 20  
|||||||:\*|||||\*||  
Sbjct: 1550 AACCACTATTTTCATCAGCTG 1531

>miR5015 Score: 2.0 R03G\_13865

Query: 1 TTGGTGATGTAGTAGTCTAC 20  
|||||||:|||||||\*||  
Sbjct: 1634 AACCACTATTTTCATCAGCTG 1615  
>miR5015 Score: 0.0 R03G\_13217  
Query: 1 TTGGTGATGTAGTAGTCTAC 20  
|||||||  
Sbjct: 1661 AACCACTACATCATCAGATG 1642  
>miR5015 Score: 0.0 R03G\_13219  
Query: 1 TTGGTGATGTAGTAGTCTAC 20  
|||||||  
Sbjct: 1661 AACCACTACATCATCAGATG 1642  
>miR5015 Score: 0.0 R03G\_13222  
Query: 1 TTGGTGATGTAGTAGTCTAC 20  
|||||||  
Sbjct: 1655 AACCACTACATCATCAGATG 1636  
>miR5015 Score: 0.0 R03G\_13225  
Query: 1 TTGGTGATGTAGTAGTCTAC 20  
|||||||  
Sbjct: 1673 AACCACTACATCATCAGATG 1654  
>miR5015 Score: 0.0 R03G\_11967  
Query: 1 TTGGTGATGTAGTAGTCTAC 20  
|||||||  
Sbjct: 1673 AACCACTACATCATCAGATG 1654  
>miR5015 Score: 2.0 R03G\_11278  
Query: 1 TTGGTGATGTAGTAGTCTAC 20  
|||||||:|||||||\*||  
Sbjct: 1565 AACCACTATTTTCATCAGCTG 1546  
>miR5015 Score: 2.0 R03G\_10777  
Query: 1 TTGGTGATGTAGTAGTCTAC 20  
|||||||:|||||||\*||  
Sbjct: 1538 AACCACTATTTTCATCAGCTG 1519  
>miR5015 Score: 2.2 R03G\_10870  
Query: 1 TTGGTGATGTAGTAGTCTAC 20  
|||||||:|||:||||:|  
Sbjct: 392 AACCACTATATCGACAGGTG 373  
>miR5015 Score: 2.0 R03G\_08609  
Query: 1 TTGGTGATGTAGTAGTCTAC 20  
|||||||:|||||||\*||  
Sbjct: 347 AACCACTATTTTCATCAGCTG 328  
>miR5015 Score: 2.0 R03G\_07869  
Query: 1 TTGGTGATGTAGTAGTCTAC 20  
|||||||:|||||||\*||  
Sbjct: 1607 AACCACTATTTTCATCAGCTG 1588  
>miR5015 Score: 0.0 R03G\_05640  
Query: 1 TTGGTGATGTAGTAGTCTAC 20



|||||  
Sbjct: 1409 AACCACTACATCATCAGATG 1390  
>miR5015 Score: 0.0 R03G\_05952  
Query: 1 TTGGTGATGTAGTAGTCTAC 20  
|||||  
Sbjct: 1541 AACCACTACATCATCAGATG 1522  
>miR5015 Score: 0.0 R03G\_03992  
Query: 1 TTGGTGATGTAGTAGTCTAC 20  
|||||  
Sbjct: 392 AACCACTACATCATCAGATG 373  
>miR5015 Score: 0.0 R03G\_04121  
Query: 1 TTGGTGATGTAGTAGTCTAC 20  
|||||  
Sbjct: 1661 AACCACTACATCATCAGATG 1642  
>miR5015 Score: 2.0 R03G\_01720  
Query: 1 TTGGTGATGTAGTAGTCTAC 20  
|||||: \* ||||| \* ||  
Sbjct: 347 AACCACTATTTTCATCAGCTG 328  
>miR4227 Score: 2.2 R03G\_17182  
Query: 1 TCTGGTACCAATCTTTCA 18  
: ||||| ||||| : || \*\*  
Sbjct: 610 GGACCATGGTTAGGAACA 593  
>miR4227 Score: 1.8 R03G\_16810  
Query: 1 TCTGGTACCAATCTTTCA 18  
: \* ||||| ||||| \*  
Sbjct: 322 GAACCATGGTTAGAAAGC 305  
>miR4227 Score: 2.0 R03G\_15739  
Query: 1 TCTGGTACCAATCTTTCA 18  
||||: || \* ||||| ||||| \*  
Sbjct: 309 AGACTATAGTTAGAAAGC 292  
>miR4227 Score: 0.0 R03G\_15157  
Query: 1 TCTGGTACCAATCTTTCA 18  
|||||  
Sbjct: 679 AGACCATGGTTAGAAAGT 662  
>miR4227 Score: 0.0 R03G\_14636  
Query: 1 TCTGGTACCAATCTTTCA 18  
|||||  
Sbjct: 55 AGACCATGGTTAGAAAGT 38  
>miR4227 Score: 2.5 R03G\_14648  
Query: 1 TCTGGTACCAATCTTTCA 18  
|||: : | \* ||||| ||||| \*  
Sbjct: 1262 AGATTAAGGTTAGAAAGA 1245  
>miR4227 Score: 2.5 R03G\_13870  
Query: 1 TCTGGTACCAATCTTTCA 18  
||||| \* ||| \* ||||| \*

Sbjct: 237 AGACCACGGTAAGAAAGG 220  
>miR4227 Score: 0.0 R03G\_13717  
Query: 1 TCTGGTACCAATCTTTCA 18  
|||||

Sbjct: 55 AGACCATGGTTAGAAAGT 38  
>miR4227 Score: 1.2 R03G\_12687  
Query: 1 TCTGGTACCAATCTTTCA 18  
:\*|||||

Sbjct: 55 GAACCATGGTTAGAAAGT 38  
>miR4227 Score: 2.2 R03G\_12960  
Query: 1 TCTGGTACCAATCTTTCA 18  
:\*|||||\*|

Sbjct: 340 GAACCATGGTTAGAAAAT 323  
>miR4227 Score: 2.2 R03G\_12974  
Query: 1 TCTGGTACCAATCTTTCA 18  
:\*|||||\*|

Sbjct: 340 GAACCATGGTTAGAAAAT 323  
>miR4227 Score: 0.0 R03G\_12005  
Query: 1 TCTGGTACCAATCTTTCA 18  
|||||

Sbjct: 679 AGACCATGGTTAGAAAGT 662  
>miR4227 Score: 0.0 R03G\_12080  
Query: 1 TCTGGTACCAATCTTTCA 18  
|||||

Sbjct: 262 AGACCATGGTTAGAAAGT 245  
>miR4227 Score: 2.2 R03G\_11343  
Query: 1 TCTGGTACCAATCTTTCA 18  
:||||\*|||\*|||||

Sbjct: 1051 GGACCACGGTAAGAAAGT 1034  
>miR4227 Score: 0.0 R03G\_11407  
Query: 1 TCTGGTACCAATCTTTCA 18  
|||||

Sbjct: 262 AGACCATGGTTAGAAAGT 245  
>miR4227 Score: 2.2 R03G\_11953  
Query: 1 TCTGGTACCAATCTTTCA 18  
:\*|||||\*|

Sbjct: 556 GAACCATGGTTAGAAAAT 539  
>miR4227 Score: 2.2 R03G\_10525  
Query: 1 TCTGGTACCAATCTTTCA 18  
:\*|||||\*|

Sbjct: 679 GAACCATGGTTAGAAAAT 662  
>miR4227 Score: 2.2 R03G\_10531  
Query: 1 TCTGGTACCAATCTTTCA 18  
:\*|||||\*|

Sbjct: 679 GAACCATGGTTAGAAAAT 662

>miR4227 Score: 2.5 R03G\_08073  
Query: 1 TCTGGTACCAATCTTTCA 18  
\*||:||||||\*||||\*  
Sbjct: 1253 CGATCATGGTTCGAAAGA 1236

>miR4227 Score: 2.0 R03G\_06830  
Query: 1 TCTGGTACCAATCTTTCA 18  
||||||\*||||||\*|  
Sbjct: 637 AGACCATGTTTAGAAATT 620

>miR4227 Score: 2.2 R03G\_07110  
Query: 1 TCTGGTACCAATCTTTCA 18  
:\*||||||\*|  
Sbjct: 679 GAACCATGGTTAGAAAAT 662

>miR4227 Score: 2.2 R03G\_07676  
Query: 1 TCTGGTACCAATCTTTCA 18  
:\*||||||\*|  
Sbjct: 679 GAACCATGGTTAGAAAAT 662

>miR4227 Score: 2.2 R03G\_07678  
Query: 1 TCTGGTACCAATCTTTCA 18  
:\*||||||\*|  
Sbjct: 679 GAACCATGGTTAGAAAAT 662

>miR4227 Score: 2.2 R03G\_07866  
Query: 1 TCTGGTACCAATCTTTCA 18  
:\*||||||\*|  
Sbjct: 55 GAACCATGGTTAGAAAAT 38

>miR4227 Score: 2.2 R03G\_05523  
Query: 1 TCTGGTACCAATCTTTCA 18  
:\*||||||\*|  
Sbjct: 679 GAACCATGGTTAGAAAAT 662

>miR4227 Score: 2.5 R03G\_05788  
Query: 1 TCTGGTACCAATCTTTCA 18  
|||\*\*:|||||  
Sbjct: 1301 AGAAGGTGGTTAGAAAGT 1284

>miR4227 Score: 0.0 R03G\_05928  
Query: 1 TCTGGTACCAATCTTTCA 18  
|||||||  
Sbjct: 451 AGACCATGGTTAGAAAGT 434

>miR4227 Score: 1.0 R03G\_04676  
Query: 1 TCTGGTACCAATCTTTCA 18  
|||||||\*|||  
Sbjct: 679 AGACCATGGTTAGTAAGT 662

>miR4227 Score: 2.5 R03G\_05187  
Query: 1 TCTGGTACCAATCTTTCA 18  
||||\*||||\*|:|  
Sbjct: 272 AGACCAAGGTAAAGAGT 255

>miR4227 Score: 2.5 R03G\_03478

Query: 1 TCTGGTACCAATCTTTCA 18  
|||||:|\*|||||:|||\*  
Sbjct: 711 AGACCGTAGTTAGGAAGC 694  
>miR4227 Score: 2.2 R03G\_03767  
Query: 1 TCTGGTACCAATCTTTCA 18  
:\*|||||\*|  
Sbjct: 679 GAACCATGGTTAGAAAAT 662  
>miR4227 Score: 2.5 R03G\_00192  
Query: 1 TCTGGTACCAATCTTTCA 18  
|||||\*|||:|\*|  
Sbjct: 973 AGACCATGGTAAGAGA-T 957  
>miR4227 Score: 2.0 R03G\_01667  
Query: 1 TCTGGTACCAATCTTTCA 18  
|\*|||||\*|  
Sbjct: 853 AAACCATGTTTAGAAAGT 836  
>miR4227 Score: 2.2 R03G\_01949  
Query: 1 TCTGGTACCAATCTTTCA 18  
:\*|||||\*|  
Sbjct: 679 GAACCATGGTTAGAAAAT 662  
>miR4227 Score: 2.2 R03G\_01968  
Query: 1 TCTGGTACCAATCTTTCA 18  
:\*|||||\*|  
Sbjct: 679 GAACCATGGTTAGAAAAT 662  
>miR4227 Score: 2.2 R03G\_17380  
Query: 1 TCTGGTACCAATCTTTCA 18  
:\*|||||\*|  
Sbjct: 679 GAACCATGGTTAGAAAAT 662  
>miR4227 Score: 2.0 R03G\_16937  
Query: 1 TCTGGTACCAATCTTTCA 18  
|||:|||||\*|  
Sbjct: 296 AGATTATGGTTAAAAAGT 279  
>miR400-3p Score: 2.2 R03G\_08936  
Query: 1 GACTTATAATGATCTCATGA 20  
||||:||||\*|  
Sbjct: 145 CTGAGTATTTT TAGAGTGCT 126  
>miR400-3p Score: 2.5 R03G\_03445  
Query: 1 GACTTATAATGATCTCATGA 20  
\*||\*|||||:||||\*|  
Sbjct: 220 ATGTATATTACTGGAGTA-T 202  
>miR400-3p Score: 2.5 R03G\_01774  
Query: 1 GACTTATAATGATCTCATGA 20  
\*||||\*|||:|||||  
Sbjct: 232 GTGAAAATTGTTAGAGTACT 213  
>miR165a-5p Score: 2.5 R03G\_12439  
Query: 1 GGAATGTTGTCTGGATCGAG 20



Sbjct: 3332 TGCTGTAGCAGAAACGAGAAA 3312  
>miR6169 Score: 2.2 R03G\_02393  
Query: 1 TCGATATCGTCTTTTCTCTCT 21  
:||||\*|||||||:|\*|||

Sbjct: 3202 GGCTCTAGCAGAAAGGA-AGA 3183  
>miR869.1 Score: 0.0 R03G\_16822  
Query: 1 TGGGTTCAAGTCTGGTGATTG 21  
|||||||

Sbjct: 270 ACCCAAGTTCAGACCACTAAC 250  
>miR869.1 Score: 0.5 R03G\_16824  
Query: 1 TGGGTTCAAGTCTGGTGATTG 21  
|||||||:|||||||

Sbjct: 270 ACCCAAGTTCAGGCCACTAAC 250  
>miR869.1 Score: 0.5 R03G\_16807  
Query: 1 TGGGTTCAAGTCTGGTGATTG 21  
|||||||:|||||||

Sbjct: 831 ACCCAAGTTCAGGCCACTAAC 811  
>miR869.1 Score: 2.5 R03G\_16699  
Query: 1 TGGGTTCAAGTCTGGTGATTG 21  
|||||||\*||\*||:|||||

Sbjct: 825 ACCCAAGTCCAGTCCGCTAAC 805  
>miR869.1 Score: 0.0 R03G\_16551  
Query: 1 TGGGTTCAAGTCTGGTGATTG 21  
|||||||

Sbjct: 831 ACCCAAGTTCAGACCACTAAC 811  
>miR869.1 Score: 0.0 R03G\_16555  
Query: 1 TGGGTTCAAGTCTGGTGATTG 21  
|||||||

Sbjct: 831 ACCCAAGTTCAGACCACTAAC 811  
>miR869.1 Score: 0.0 R03G\_15675  
Query: 1 TGGGTTCAAGTCTGGTGATTG 21  
|||||||

Sbjct: 831 ACCCAAGTTCAGACCACTAAC 811  
>miR869.1 Score: 0.0 R03G\_15287  
Query: 1 TGGGTTCAAGTCTGGTGATTG 21  
|||:|||||||\*|||||:||

Sbjct: 465 ACCTAAGTTCAGTCCACTGAC 445  
>miR869.1 Score: 0.5 R03G\_14359  
Query: 1 TGGGTTCAAGTCTGGTGATTG 21  
|||||||:|||||||

Sbjct: 831 ACCCAAGTTCAGGCCACTAAC 811  
>miR869.1 Score: 0.5 R03G\_13456  
Query: 1 TGGGTTCAAGTCTGGTGATTG 21  
|||||||:|||||||

Sbjct: 228 ACCCAAGTTCAGGCCACTAAC 208

>miR869.1 Score: 0.0 R03G\_13727  
Query: 1 TGGGTTCAAGTCTGGTGATTG 21  
|||||  
Sbjct: 270 ACCCAAGTTCAGACCACTAAC 250

>miR869.1 Score: 0.0 R03G\_13737  
Query: 1 TGGGTTCAAGTCTGGTGATTG 21  
|||||  
Sbjct: 270 ACCCAAGTTCAGACCACTAAC 250

>miR869.1 Score: 0.0 R03G\_13848  
Query: 1 TGGGTTCAAGTCTGGTGATTG 21  
|||||  
Sbjct: 831 ACCCAAGTTCAGACCACTAAC 811

>miR869.1 Score: 2.2 R03G\_12664  
Query: 1 TGGGTTCAAGTCTGGTGATTG 21  
|||:|||||:|\*||:|  
Sbjct: 558 ACCTAAGTTCAGGCCCTGAC 538

>miR869.1 Score: 0.5 R03G\_13151  
Query: 1 TGGGTTCAAGTCTGGTGATTG 21  
|||||:|||||  
Sbjct: 831 ACCCAAGTTCAGGCCACTAAC 811

>miR869.1 Score: 2.5 R03G\_12177  
Query: 1 TGGGTTCAAGTCTGGTGATTG 21  
||||||\*||\*||:||||  
Sbjct: 825 ACCCAAGTCCAGTCCGCTAAC 805

>miR869.1 Score: 2.5 R03G\_11267  
Query: 1 TGGGTTCAAGTCTGGTGATTG 21  
||||||\*||\*||:||||  
Sbjct: 825 ACCCAAGTCCAGTCCGCTAAC 805

>miR869.1 Score: 2.5 R03G\_11280  
Query: 1 TGGGTTCAAGTCTGGTGATTG 21  
||||||\*||\*||:||||  
Sbjct: 633 ACCCAAGTCCAGTCCGCTAAC 613

>miR869.1 Score: 0.0 R03G\_11401  
Query: 1 TGGGTTCAAGTCTGGTGATTG 21  
|||||  
Sbjct: 831 ACCCAAGTTCAGACCACTAAC 811

>miR869.1 Score: 0.0 R03G\_11773  
Query: 1 TGGGTTCAAGTCTGGTGATTG 21  
|||||  
Sbjct: 831 ACCCAAGTTCAGACCACTAAC 811

>miR869.1 Score: 0.5 R03G\_10235  
Query: 1 TGGGTTCAAGTCTGGTGATTG 21  
|||||:|||||  
Sbjct: 831 ACCCAAGTTCAGGCCACTAAC 811

>miR869.1 Score: 2.5 R03G\_10549

Query: 1 TGGGTTCAAGTCTGGTGATTG 21  
|||||||\*||\*||:|||||  
Sbjct: 825 ACCCAAGTCCAGTCCGCTAAC 805  
>miR869.1 Score: 0.5 R03G\_10732  
Query: 1 TGGGTTCAAGTCTGGTGATTG 21  
|||||||:|||||||  
Sbjct: 831 ACCCAAGTTCAGGCCACTAAC 811  
>miR869.1 Score: 0.5 R03G\_09483  
Query: 1 TGGGTTCAAGTCTGGTGATTG 21  
|||||||:|||||||  
Sbjct: 831 ACCCAAGTTCAGGCCACTAAC 811  
>miR869.1 Score: 0.5 R03G\_09499  
Query: 1 TGGGTTCAAGTCTGGTGATTG 21  
|||||||:|||||||  
Sbjct: 831 ACCCAAGTTCAGGCCACTAAC 811  
>miR869.1 Score: 1.0 R03G\_09544  
Query: 1 TGGGTTCAAGTCTGGTGATTG 21  
|||||||:|||:||||  
Sbjct: 831 ACCCAAGTTCAGGCCATTAAC 811  
>miR869.1 Score: 0.0 R03G\_09607  
Query: 1 TGGGTTCAAGTCTGGTGATTG 21  
|||||||:|||||||  
Sbjct: 831 ACCCAAGTTCAGACCACTAAC 811  
>miR869.1 Score: 2.5 R03G\_07995  
Query: 1 TGGGTTCAAGTCTGGTGATTG 21  
|||||||\*||\*||:|||||  
Sbjct: 732 ACCCAAGTCCAGTCCGCTAAC 712  
>miR869.1 Score: 0.0 R03G\_08661  
Query: 1 TGGGTTCAAGTCTGGTGATTG 21  
|||||||:|||||||  
Sbjct: 831 ACCCAAGTTCAGACCACTAAC 811  
>miR869.1 Score: 0.0 R03G\_08846  
Query: 1 TGGGTTCAAGTCTGGTGATTG 21  
|||||||:|||||||  
Sbjct: 831 ACCCAAGTTCAGACCACTAAC 811  
>miR869.1 Score: 0.5 R03G\_07303  
Query: 1 TGGGTTCAAGTCTGGTGATTG 21  
|||||||:|||||||  
Sbjct: 831 ACCCAAGTTCAGGCCACTAAC 811  
>miR869.1 Score: 2.2 R03G\_07688  
Query: 1 TGGGTTCAAGTCTGGTGATTG 21  
|||:||||||\*|:||||:|  
Sbjct: 831 ACCTAAGTTCTGGCCACTGAC 811  
>miR869.1 Score: 0.0 R03G\_07706  
Query: 1 TGGGTTCAAGTCTGGTGATTG 21



|||||  
Sbjct: 168 ACCCAAGTTCAGACCACTAAC 148  
>miR869.1 Score: 0.5 R03G\_07875  
Query: 1 TGGGTTCAAGTCTGGTGATTG 21  
|||||:|||||  
Sbjct: 831 ACCCAAGTTCAGGCCACTAAC 811  
>miR869.1 Score: 0.5 R03G\_05622  
Query: 1 TGGGTTCAAGTCTGGTGATTG 21  
|||||:|||||  
Sbjct: 831 ACCCAAGTTCAGGCCACTAAC 811  
>miR869.1 Score: 0.0 R03G\_05635  
Query: 1 TGGGTTCAAGTCTGGTGATTG 21  
|||||:|||||  
Sbjct: 831 ACCCAAGTTCAGACCACTAAC 811  
>miR869.1 Score: 2.5 R03G\_05904  
Query: 1 TGGGTTCAAGTCTGGTGATTG 21  
|||||\*||\*||:|||||  
Sbjct: 825 ACCCAAGTCCAGTCCGCTAAC 805  
>miR869.1 Score: 0.5 R03G\_05915  
Query: 1 TGGGTTCAAGTCTGGTGATTG 21  
|||||:|||||  
Sbjct: 831 ACCCAAGTTCAGGCCACTAAC 811  
>miR869.1 Score: 0.5 R03G\_06423  
Query: 1 TGGGTTCAAGTCTGGTGATTG 21  
|||||:|||||  
Sbjct: 885 ACCCAAGTTCAGGCCACTAAC 865  
>miR869.1 Score: 0.0 R03G\_06441  
Query: 1 TGGGTTCAAGTCTGGTGATTG 21  
|||||:|||||  
Sbjct: 831 ACCCAAGTTCAGACCACTAAC 811  
>miR869.1 Score: 0.5 R03G\_05336  
Query: 1 TGGGTTCAAGTCTGGTGATTG 21  
|||||:|||||  
Sbjct: 831 ACCCAAGTTCAGGCCACTAAC 811  
>miR869.1 Score: 0.0 R03G\_02689  
Query: 1 TGGGTTCAAGTCTGGTGATTG 21  
|||||:|||||  
Sbjct: 831 ACCCAAGTTCAGACCACTAAC 811  
>miR869.1 Score: 1.8 R03G\_02844  
Query: 1 TGGGTTCAAGTCTGGTGATTG 21  
|||:|||||\*||||:||  
Sbjct: 609 ACCTAAGTTCAGTCCACTGAC 589  
>miR869.1 Score: 0.0 R03G\_03571  
Query: 1 TGGGTTCAAGTCTGGTGATTG 21  
|||||

Sbjct: 831 ACCCAAGTTCAGACCACTAAC 811  
>miR869.1 Score: 1.0 R03G\_03616  
Query: 1 TGGGTTCAAGTCTGGTGATTG 21  
|\*|||||||||||||||||  
Sbjct: 270 AGCCAAGTTCAGACCACTAAC 250  
>miR869.1 Score: 1.8 R03G\_03766  
Query: 1 TGGGTTCAAGTCTGGTGATTG 21  
|||:|||||||\*|||||:|  
Sbjct: 609 ACCTAAGTTCAGTCCACTGAC 589  
>miR869.1 Score: 0.5 R03G\_00681  
Query: 1 TGGGTTCAAGTCTGGTGATTG 21  
|||||||||||:|||||||  
Sbjct: 831 ACCCAAGTTCAGGCCACTAAC 811  
>miR869.1 Score: 2.5 R03G\_01305  
Query: 1 TGGGTTCAAGTCTGGTGATTG 21  
|||||||\*||\*||:|||||  
Sbjct: 825 ACCCAAGTCCAGTCCGCTAAC 805  
>miR869.1 Score: 1.0 R03G\_01322  
Query: 1 TGGGTTCAAGTCTGGTGATTG 21  
|||||||||||:|||||||  
Sbjct: 717 ACCCAAGTTCAGGTCACTAAC 697  
>miR869.1 Score: 0.5 R03G\_01652  
Query: 1 TGGGTTCAAGTCTGGTGATTG 21  
|||||||||||:|||||||  
Sbjct: 831 ACCCAAGTTCAGGCCACTAAC 811  
>miR869.1 Score: 0.5 R03G\_01730  
Query: 1 TGGGTTCAAGTCTGGTGATTG 21  
|||||||||||:|||||||  
Sbjct: 831 ACCCAAGTTCAGGCCACTAAC 811  
>miR869.1 Score: 0.0 R03G\_01956  
Query: 1 TGGGTTCAAGTCTGGTGATTG 21  
|||||||||||:|||||||  
Sbjct: 831 ACCCAAGTTCAGACCACTAAC 811  
>miR869.1 Score: 0.5 R03G\_17400  
Query: 1 TGGGTTCAAGTCTGGTGATTG 21  
|||||||||||:|||||||  
Sbjct: 705 ACCCAAGTTCAGGCCACTAAC 685  
>miR869.1 Score: 0.5 R03G\_17382  
Query: 1 TGGGTTCAAGTCTGGTGATTG 21  
|||||||||||:|||||||  
Sbjct: 831 ACCCAAGTTCAGGCCACTAAC 811  
>miR869.1 Score: 0.0 R03G\_17285  
Query: 1 TGGGTTCAAGTCTGGTGATTG 21  
|||||||||||:|||||||  
Sbjct: 831 ACCCAAGTTCAGACCACTAAC 811

>miR447a-3p Score: 0.0 R03G\_15872  
Query: 1 TTGCGGACGAGAATTTTGTG 20  
|||||  
Sbjct: 130 AACGCCTGCTCTTAAAACAC 111

>miR447a-3p Score: 2.5 R03G\_11868  
Query: 1 TTGCGGACGAGAATTTTGTG 20  
|||\*|||||\*|||||\*|  
Sbjct: 843 AACTCCTGCTATTA AAAAC-C 825

>miR477 Score: 2.5 R03G\_10629  
Query: 1 TTGGAGTATCTTTGGAGGAGC 21  
|||||\*|||\*|||\*|||  
Sbjct: 325 AACCTCATAAAAAGCTC-TCG 306

>miR4412-5p Score: 0.5 R03G\_16716  
Query: 1 TGTTGCGGATATTCTTTGCACT 22  
|||||:|||||  
Sbjct: 355 ACAACGCCTATAGGAAACGTGA 334

>miR4412-5p Score: 0.5 R03G\_16373  
Query: 1 TGTTGCGGATATTCTTTGCACT 22  
|||||\*|||  
Sbjct: 229 ACAACGCCTATAAGAAACATGA 208

>miR4412-5p Score: 0.5 R03G\_16554  
Query: 1 TGTTGCGGATATTCTTTGCACT 22  
|||||\*|||  
Sbjct: 376 ACAACGCCTATAAGAAACGCGA 355

>miR4412-5p Score: 0.0 R03G\_16146  
Query: 1 TGTTGCGGATATTCTTTGCACT 22  
|||||  
Sbjct: 406 ACAACGCCTATAAGAAACGTGA 385

>miR4412-5p Score: 2.0 R03G\_14895  
Query: 1 TGTTGCGGATATTCTTTGCACT 22  
||:|||:||||:|||||\*|||  
Sbjct: 139 ACGACGTCTATGAGAAACCTGA 118

>miR4412-5p Score: 0.5 R03G\_15146  
Query: 1 TGTTGCGGATATTCTTTGCACT 22  
|||||\*|||  
Sbjct: 256 ACAACGCCTATAAGAAACGCGA 235

>miR4412-5p Score: 0.5 R03G\_15251  
Query: 1 TGTTGCGGATATTCTTTGCACT 22  
|||||\*|||  
Sbjct: 337 ACAACGCCTATAAGAAACATGA 316

>miR4412-5p Score: 0.0 R03G\_12466  
Query: 1 TGTTGCGGATATTCTTTGCACT 22  
|||||  
Sbjct: 229 ACAACGCCTATAAGAAACGTGA 208

>miR4412-5p Score: 2.5 R03G\_11240

Query: 1 TGTTGCGGATATTCTTTGCACT 22  
|\*|||:||||\*|||||  
Sbjct: 199 AGAACGTCTATAAAAAACGTGA 178  
>miR4412-5p Score: 2.5 R03G\_11266

Query: 1 TGTTGCGGATATTCTTTGCACT 22  
|\*|||:||||\*|||||  
Sbjct: 199 AGAACGTCTATAAAAAACGTGA 178  
>miR4412-5p Score: 0.0 R03G\_10239

Query: 1 TGTTGCGGATATTCTTTGCACT 22  
|||||  
Sbjct: 370 ACAACGCCTATAAGAAACGTGA 349  
>miR4412-5p Score: 0.5 R03G\_09616

Query: 1 TGTTGCGGATATTCTTTGCACT 22  
|||:|||||  
Sbjct: 370 ACAGCGCCTATAAGAAACGTGA 349  
>miR4412-5p Score: 0.5 R03G\_07031

Query: 1 TGTTGCGGATATTCTTTGCACT 22  
|||||\*||  
Sbjct: 376 ACAACGCCTATAAGAAACGCGA 355  
>miR4412-5p Score: 0.0 R03G\_07032

Query: 1 TGTTGCGGATATTCTTTGCACT 22  
|||||  
Sbjct: 304 ACAACGCCTATAAGAAACGTGA 283  
>miR4412-5p Score: 0.0 R03G\_07037

Query: 1 TGTTGCGGATATTCTTTGCACT 22  
|||||  
Sbjct: 316 ACAACGCCTATAAGAAACGTGA 295  
>miR4412-5p Score: 0.0 R03G\_07713

Query: 1 TGTTGCGGATATTCTTTGCACT 22  
|||||  
Sbjct: 205 ACAACGCCTATAAGAAACGTGA 184  
>miR4412-5p Score: 0.0 R03G\_04677

Query: 1 TGTTGCGGATATTCTTTGCACT 22  
|||||  
Sbjct: 376 ACAACGCCTATAAGAAACGTGA 355  
>miR4412-5p Score: 1.8 R03G\_05212

Query: 1 TGTTGCGGATATTCTTTGCACT 22  
|||||:|\*|\*|  
Sbjct: 446 ACAACGCCTATAAGAAGTTTAA 425  
>miR4412-5p Score: 0.0 R03G\_02950

Query: 1 TGTTGCGGATATTCTTTGCACT 22  
|||||  
Sbjct: 229 ACAACGCCTATAAGAAACGTGA 208  
>miR4412-5p Score: 0.5 R03G\_03768

Query: 1 TGTTGCGGATATTCTTTGCACT 22

|||||\*|||  
Sbjct: 190 ACAACGCCTATAAGAAACATGA 169  
>miR4412-5p Score: 0.5 R03G\_00243  
Query: 1 TGTTGCGGATATTCTTTGCACT 22  
|||||  
Sbjct: 355 ACAATGCCTATAAGAAACGTGA 334  
>miR4412-5p Score: 0.0 R03G\_01190  
Query: 1 TGTTGCGGATATTCTTTGCACT 22  
|||||  
Sbjct: 229 ACAACGCCTATAAGAAACGTGA 208  
>miR4412-5p Score: 0.0 R03G\_01209  
Query: 1 TGTTGCGGATATTCTTTGCACT 22  
|||||  
Sbjct: 370 ACAACGCCTATAAGAAACGTGA 349  
>miR4412-5p Score: 0.0 R03G\_01732  
Query: 1 TGTTGCGGATATTCTTTGCACT 22  
|||||  
Sbjct: 229 ACAACGCCTATAAGAAACGTGA 208  
>miR4412-5p Score: 0.5 R03G\_01932  
Query: 1 TGTTGCGGATATTCTTTGCACT 22  
|||||\*|||  
Sbjct: 580 ACAACGCCTATAAGAAACATGA 559  
>miR4412-5p Score: 0.0 R03G\_17448  
Query: 1 TGTTGCGGATATTCTTTGCACT 22  
|||||  
Sbjct: 370 ACAACGCCTATAAGAAACGTGA 349  
>miR5163b-3p Score: 1.5 R03G\_15290  
Query: 1 TAGATACTTTGGTTGTGGGA 20  
|||||\*|||  
Sbjct: 154 ATCTATAGAACCAACACCCT 135  
>miR5163b-3p Score: 0.5 R03G\_15497  
Query: 1 TAGATACTTTGGTTGTGGGA 20  
|||||\*|||  
Sbjct: 154 ATCTATGGAACCAACACCCT 135  
>miR5163b-3p Score: 1.5 R03G\_13307  
Query: 1 TAGATACTTTGGTTGTGGGA 20  
|||\*|||  
Sbjct: 187 ATCTTTGGAACCAACACCCT 168  
>miR5163b-3p Score: 1.5 R03G\_12685  
Query: 1 TAGATACTTTGGTTGTGGGA 20  
|\*|||||  
Sbjct: 208 ACCTATGGAACCAACACCCT 189  
>miR5163b-3p Score: 1.0 R03G\_13022  
Query: 1 TAGATACTTTGGTTGTGGGA 20  
|||||\*|||

Sbjct: 226 ATCTATGGAACCAACATCCT 207  
>miR5163b-3p Score: 0.0 R03G\_12243  
Query: 1 TAGATACTTTGGTTGTGGGA 20  
|||||

Sbjct: 226 ATCTATGAAACCAACACCCT 207  
>miR5163b-3p Score: 0.5 R03G\_12446  
Query: 1 TAGATACTTTGGTTGTGGGA 20  
|||||:|||||

Sbjct: 226 ATCTATGGAACCAACACCCT 207  
>miR5163b-3p Score: 0.0 R03G\_10657  
Query: 1 TAGATACTTTGGTTGTGGGA 20  
|||||

Sbjct: 226 ATCTATGAAACCAACACCCT 207  
>miR5163b-3p Score: 2.5 R03G\_08353  
Query: 1 TAGATACTTTGGTTGTGGGA 20  
\*||\*:|||||\*||

Sbjct: 440 TTCAGTGAAACCAACAC-CT 422  
>miR5163b-3p Score: 1.0 R03G\_08447  
Query: 1 TAGATACTTTGGTTGTGGGA 20  
|||||:|||||:|||

Sbjct: 226 ATCTATGGAACCAACATCCT 207  
>miR5163b-3p Score: 0.5 R03G\_09087  
Query: 1 TAGATACTTTGGTTGTGGGA 20  
|||||:|||||

Sbjct: 226 ATCTATGGAACCAACACCCT 207  
>miR5163b-3p Score: 2.5 R03G\_05552  
Query: 1 TAGATACTTTGGTTGTGGGA 20  
:|||\*|||||:|||||:|

Sbjct: 208 GTCTCTGAAATTAACACCTT 189  
>miR5163b-3p Score: 0.5 R03G\_05724  
Query: 1 TAGATACTTTGGTTGTGGGA 20  
|||||:|||||

Sbjct: 187 ATCTATGGAACCAACACCCT 168  
>miR5163b-3p Score: 0.5 R03G\_04502  
Query: 1 TAGATACTTTGGTTGTGGGA 20  
|||||:|||||

Sbjct: 226 ATCTATGGAACCAACACCCT 207  
>miR5163b-3p Score: 2.5 R03G\_05035  
Query: 1 TAGATACTTTGGTTGTGGGA 20  
:|||||:|||||\*\*:

Sbjct: 970 GTCTATGAAATCAACA-ATT 952  
>miR5163b-3p Score: 0.0 R03G\_02942  
Query: 1 TAGATACTTTGGTTGTGGGA 20  
|||||

Sbjct: 226 ATCTATGAAACCAACACCCT 207

>miR5163b-3p Score: 0.5 R03G\_03523  
Query: 1 TAGATACTTTGGTTGTGGGA 20  
|||||||:|||||||  
Sbjct: 226 ATCTATGGAACCAACACCCT 207

>miR5163b-3p Score: 1.5 R03G\_03564  
Query: 1 TAGATACTTTGGTTGTGGGA 20  
|||||||:||:|||||||\*|  
Sbjct: 639 ATCTATGGAATCAACACCAT 620

>miR5163b-3p Score: 2.5 R03G\_03712  
Query: 1 TAGATACTTTGGTTGTGGGA 20  
\*|||||\*:|||||||:|||||  
Sbjct: 79 TTCTATTGAACCAACGCCCT 60

>miR5163b-3p Score: 2.0 R03G\_03971  
Query: 1 TAGATACTTTGGTTGTGGGA 20  
|||||\*|:|||||||:|||  
Sbjct: 226 ATCTAAGGAACCAACATCCT 207

>miR5163b-3p Score: 0.5 R03G\_04017  
Query: 1 TAGATACTTTGGTTGTGGGA 20  
|||||||:|||||||  
Sbjct: 226 ATCTATGGAACCAACACCCT 207

>miR5163b-3p Score: 0.5 R03G\_01530  
Query: 1 TAGATACTTTGGTTGTGGGA 20  
|||||||:|||||||  
Sbjct: 226 ATCTATGGAACCAACACCCT 207

>miR5632-5p Score: 2.5 R03G\_16460  
Query: 1 TGTCATTCTTTATCCAACCTG 20  
||\*\*|||||||\*||  
Sbjct: 2405 ACTATAAGAAATAGGTTAAC 2386

>miR5632-5p Score: 2.5 R03G\_10250  
Query: 1 TGTCATTCTTTATCCAACCTG 20  
\*:\*|||||||  
Sbjct: 1541 TTGTTAAGAAATAGGTTGAC 1522

>miR5632-5p Score: 2.2 R03G\_10750  
Query: 1 TGTCATTCTTTATCCAACCTG 20  
||\*|||:|||||||\*|:  
Sbjct: 254 ACTGTAGGAAATAGGTTTAT 235

>miR5632-5p Score: 0.0 R03G\_08617  
Query: 1 TGTCATTCTTTATCCAACCTG 20  
|||||||  
Sbjct: 1708 ACAGTAAGAAATAGGTTGAC 1689

>miR5632-5p Score: 0.0 R03G\_05328  
Query: 1 TGTCATTCTTTATCCAACCTG 20  
|||||||  
Sbjct: 781 ACAGTAAGAAATAGGTTGAC 762

>miR5632-5p Score: 2.2 R03G\_17115

Query: 1 TGTCATTCTTTATCCAACG 20  
|:||||\*|||||||\*:  
Sbjct: 961 ATAGAAAGAAATAGGTTGTT 942  
>miR7122-5p Score: 0.0 R03G\_17211  
Query: 1 TTATCAGAGAATACTACGCGTCG 23  
|  
Sbjct: 446 AATAGTCTCTTATGATGCGCAGC 424  
>miR7122-5p Score: 2.5 R03G\_16548  
Query: 1 TTATCAGAGAATACTACGCGTCG 23  
|:|||||:|:|\*|||||||  
Sbjct: 278 AGTAGTCTTTTGTAAATGCGCAGC 256  
>miR7122-5p Score: 0.5 R03G\_15873  
Query: 1 TTATCAGAGAATACTACGCGTCG 23  
|:|||||||  
Sbjct: 446 AGTAGTCTCTTATGATGCGCAGC 424  
>miR7122-5p Score: 0.0 R03G\_15154  
Query: 1 TTATCAGAGAATACTACGCGTCG 23  
|  
Sbjct: 446 AATAGTCTCTTATGATGCGCAGC 424  
>miR7122-5p Score: 1.5 R03G\_13447  
Query: 1 TTATCAGAGAATACTACGCGTCG 23  
|:|||||||\*|||||||  
Sbjct: 446 AGTAGTCTCTCATGATGCGCAGC 424  
>miR7122-5p Score: 0.0 R03G\_13706  
Query: 1 TTATCAGAGAATACTACGCGTCG 23  
|  
Sbjct: 404 AATAGTCTCTTATGATGCGCAGC 382  
>miR7122-5p Score: 0.0 R03G\_12172  
Query: 1 TTATCAGAGAATACTACGCGTCG 23  
|  
Sbjct: 446 AATAGTCTCTTATGATGCGCAGC 424  
>miR7122-5p Score: 0.0 R03G\_12526  
Query: 1 TTATCAGAGAATACTACGCGTCG 23  
|  
Sbjct: 446 AATAGTCTCTTATGATGCGCAGC 424  
>miR7122-5p Score: 0.5 R03G\_11244  
Query: 1 TTATCAGAGAATACTACGCGTCG 23  
|:|||||||  
Sbjct: 446 AGTAGTCTCTTATGATGCGCAGC 424  
>miR7122-5p Score: 0.5 R03G\_11526  
Query: 1 TTATCAGAGAATACTACGCGTCG 23  
|:|||||||  
Sbjct: 278 AGTAGTCTCTTATGATGCGCAGC 256  
>miR7122-5p Score: 1.5 R03G\_11534  
Query: 1 TTATCAGAGAATACTACGCGTCG 23



|:|||||||\*|||||||  
Sbjct: 446 AGTAGTCTCTCATGATGCGCAGC 424  
>miR7122-5p Score: 0.5 R03G\_11948  
Query: 1 TTATCAGAGAATACTACGCGTCG 23  
|:|||||||  
Sbjct: 446 AGTAGTCTCTTATGATGCGCAGC 424  
>miR7122-5p Score: 0.5 R03G\_10537  
Query: 1 TTATCAGAGAATACTACGCGTCG 23  
|:|||||||  
Sbjct: 446 AGTAGTCTCTTATGATGCGCAGC 424  
>miR7122-5p Score: 0.5 R03G\_10720  
Query: 1 TTATCAGAGAATACTACGCGTCG 23  
|:|||||||  
Sbjct: 446 AGTAGTCTCTTATGATGCGCAGC 424  
>miR7122-5p Score: 0.5 R03G\_09199  
Query: 1 TTATCAGAGAATACTACGCGTCG 23  
|:|||||||  
Sbjct: 446 AGTAGTCTCTTATGATGCGCAGC 424  
>miR7122-5p Score: 0.5 R03G\_09924  
Query: 1 TTATCAGAGAATACTACGCGTCG 23  
|:|||||||  
Sbjct: 446 AGTAGTCTCTTATGATGCGCAGC 424  
>miR7122-5p Score: 1.5 R03G\_10044  
Query: 1 TTATCAGAGAATACTACGCGTCG 23  
|:|||||||\*|||||||  
Sbjct: 446 AGTAGTCTCTCATGATGCGCAGC 424  
>miR7122-5p Score: 0.5 R03G\_07994  
Query: 1 TTATCAGAGAATACTACGCGTCG 23  
|:|||||||  
Sbjct: 446 AGTAGTCTCTTATGATGCGCAGC 424  
>miR7122-5p Score: 0.5 R03G\_08838  
Query: 1 TTATCAGAGAATACTACGCGTCG 23  
|:|||||||  
Sbjct: 446 AGTAGTCTCTTATGATGCGCAGC 424  
>miR7122-5p Score: 0.5 R03G\_07295  
Query: 1 TTATCAGAGAATACTACGCGTCG 23  
|:|||||||  
Sbjct: 278 AGTAGTCTCTTATGATGCGCAGC 256  
>miR7122-5p Score: 1.5 R03G\_07683  
Query: 1 TTATCAGAGAATACTACGCGTCG 23  
|:|||||||\*|||||||  
Sbjct: 446 AGTAGTCTCTCATGATGCGCAGC 424  
>miR7122-5p Score: 0.5 R03G\_05916  
Query: 1 TTATCAGAGAATACTACGCGTCG 23  
|:|||||||

Sbjct: 446 AGTAGTCTCTTATGATGCGCAGC 424  
>miR7122-5p Score: 1.5 R03G\_03558  
Query: 1 TTATCAGAGAATACTACGCGTCG 23  
|:|||||||\*|||||||

Sbjct: 446 AGTAGTCTCTCATGATGCGCAGC 424  
>miR7122-5p Score: 0.5 R03G\_03617  
Query: 1 TTATCAGAGAATACTACGCGTCG 23  
|:|||||||

Sbjct: 446 AGTAGTCTCTTATGATGCGCAGC 424  
>miR7122-5p Score: 0.5 R03G\_03987  
Query: 1 TTATCAGAGAATACTACGCGTCG 23  
|:|||||||

Sbjct: 446 AGTAGTCTCTTATGATGCGCAGC 424  
>miR7122-5p Score: 1.0 R03G\_01194  
Query: 1 TTATCAGAGAATACTACGCGTCG 23  
|:|||||||

Sbjct: 446 AGTAGTCTCTTATGATGCGCATC 424  
>miR7122-5p Score: 0.5 R03G\_01313  
Query: 1 TTATCAGAGAATACTACGCGTCG 23  
|:|||||||\*|

Sbjct: 446 AGTAGTCTCTTATGATGCGCAGC 424  
>miR7122-5p Score: 1.5 R03G\_01735  
Query: 1 TTATCAGAGAATACTACGCGTCG 23  
|:|||||||\*|||||||

Sbjct: 446 AGTAGTCTCTCATGATGCGCAGC 424  
>miR7122-5p Score: 0.5 R03G\_01950  
Query: 1 TTATCAGAGAATACTACGCGTCG 23  
|:|||||||

Sbjct: 446 AGTAGTCTCTTATGATGCGCAGC 424  
>miR7122-5p Score: 1.5 R03G\_01951  
Query: 1 TTATCAGAGAATACTACGCGTCG 23  
|:|||||||\*|||||||

Sbjct: 446 AGTAGTCTCTCATGATGCGCAGC 424  
>miR7122-5p Score: 0.0 R03G\_17409  
Query: 1 TTATCAGAGAATACTACGCGTCG 23  
|:|||||||

Sbjct: 446 AATAGTCTCTTATGATGCGCAGC 424  
>miR6266a Score: 2.2 R03G\_13524  
Query: 1 TATATGCAGGCGCAAAT-AT 20  
:|\*|||||||:||||\*||

Sbjct: 2686 GTAGACGTCCGCTGTTTAATA 2666  
>miR5050 Score: 0.5 R03G\_13220  
Query: 1 TGAGGTCGATTCACCAGCAT 20  
|:|||||||

Sbjct: 1323 ACTCCAGCTAAGTGGTTGTA 1304

```

>miR5050 Score: 0.5 R03G_13223
Query: 1 TGAGGTCGATTCACCAGCAT 20
|||||:|
Sbjct: 1323 ACTCCAGCTAAGTGGTTGTA 1304
>miR5050 Score: 2.5 R03G_10401
Query: 1 TGAGGTCGATTCACCAGCAT 20
|||||*|*|*
Sbjct: 5684 ACTCCAGCTAAGTGTTAGTC 5665
>miR5050 Score: 0.0 R03G_04119
Query: 1 TGAGGTCGATTCACCAGCAT 20
|||||
Sbjct: 1323 ACTCCAGCTAAGTGGTCGTA 1304
>miR5050 Score: 0.5 R03G_04122
Query: 1 TGAGGTCGATTCACCAGCAT 20
|||||:|
Sbjct: 1323 ACTCCAGCTAAGTGGTTGTA 1304
>miR390a-5p Score: 2.0 R03G_15231
Query: 1 AAGCTCAGGAGGGATAGCGC 20
|||||:|:|*|*
Sbjct: 96 TTCGAGTCCTTCTTATC-CT 78
>miR390a-5p Score: 1.8 R03G_12249
Query: 1 AAGCTCAGGAGGGATAGCG-C 20
*|:|||||*|
Sbjct: 329 CTTGAGTCCTCCCTATCGTAG 309
>miR390a-5p Score: 2.5 R03G_07397
Query: 1 AAGCTCAGGAGGGATAGCGC 20
|||||:|*|*|*
Sbjct: 561 TTCGAGTCCTTCCAATC-CT 543
>miR390a-5p Score: 2.5 R03G_01438
Query: 1 AAGCTCAGGAGGGATAGCGC 20
|||||*|||:|||||
Sbjct: 114 TTCGAGTAATCCTTATCGCG 95
>miR6148a Score: 2.0 R03G_02078
Query: 1 TGCGGTCGATCGCTTGTCTT 21
||*|||||*|||
Sbjct: 205 ACCCCAGCTAGCGAACTAGAA 185
>miR847-3p Score: 2.2 R03G_12785
Query: 1 TGA CTCCTCTTCTTCTGG-TCG 21
:|*|||||*||:
Sbjct: 303 GCTTAGGAGAAGAAGACTAAGT 282
>miR847-3p Score: 2.0 R03G_02368
Query: 1 TGA CTCCTCTTCTTCTGGTCG 21
||||*|||:|||||*|
Sbjct: 243 ACTGAAGAGAGGAAGACCACC 223
>miR847-3p Score: 2.0 R03G_03499

```

Query: 1 TGACTCCTCTTCTTCTGGTCG 21  
||\*||||||||||||||\*||\*|  
Sbjct: 2118 ACAGAGGAGAAGAAGAC-AAC 2099  
>miR172c-3p Score: 0.0 R03G\_17169  
Query: 1 AGATATCTTTGACAATGCTGC 21  
||||||||||||||||||  
Sbjct: 244 TCTATAGAAACTGTTACGACG 224  
>miR172c-3p Score: 0.0 R03G\_16821  
Query: 1 AGATATCTTTGACAATGCTGC 21  
||||||||||||||||||  
Sbjct: 244 TCTATAGAAACTGTTACGACG 224  
>miR172c-3p Score: 0.0 R03G\_16898  
Query: 1 AGATATCTTTGACAATGCTGC 21  
||||||||||||||||||  
Sbjct: 244 TCTATAGAAACTGTTACGACG 224  
>miR172c-3p Score: 0.0 R03G\_16687  
Query: 1 AGATATCTTTGACAATGCTGC 21  
||||||||||||||||||  
Sbjct: 244 TCTATAGAAACTGTTACGACG 224  
>miR172c-3p Score: 0.0 R03G\_14983  
Query: 1 AGATATCTTTGACAATGCTGC 21  
||||||||||||||||||  
Sbjct: 49 TCTATAGAAACTGTTACGACG 29  
>miR172c-3p Score: 0.0 R03G\_14357  
Query: 1 AGATATCTTTGACAATGCTGC 21  
||||||||||||||||||  
Sbjct: 244 TCTATAGAAACTGTTACGACG 224  
>miR172c-3p Score: 0.0 R03G\_14623  
Query: 1 AGATATCTTTGACAATGCTGC 21  
||||||||||||||||||  
Sbjct: 244 TCTATAGAAACTGTTACGACG 224  
>miR172c-3p Score: 0.0 R03G\_13914  
Query: 1 AGATATCTTTGACAATGCTGC 21  
||||||||||||||||||  
Sbjct: 244 TCTATAGAAACTGTTACGACG 224  
>miR172c-3p Score: 0.0 R03G\_13719  
Query: 1 AGATATCTTTGACAATGCTGC 21  
||||||||||||||||||  
Sbjct: 244 TCTATAGAAACTGTTACGACG 224  
>miR172c-3p Score: 0.0 R03G\_13721  
Query: 1 AGATATCTTTGACAATGCTGC 21  
||||||||||||||||||  
Sbjct: 244 TCTATAGAAACTGTTACGACG 224  
>miR172c-3p Score: 0.0 R03G\_13864  
Query: 1 AGATATCTTTGACAATGCTGC 21

|||||  
Sbjct: 244 TCTATAGAAACTGTTACGACG 224  
>miR172c-3p Score: 0.0 R03G\_12058  
Query: 1 AGATATCTTTGACAATGCTGC 21  
|||||  
Sbjct: 244 TCTATAGAAACTGTTACGACG 224  
>miR172c-3p Score: 2.0 R03G\_11149  
Query: 1 AGATATCTTTGACAATGCTGC 21  
\*:|||||\*|\*|  
Sbjct: 268 ATTATAGAAACTGTTAC-AAG 249  
>miR172c-3p Score: 0.0 R03G\_10801  
Query: 1 AGATATCTTTGACAATGCTGC 21  
|||||  
Sbjct: 49 TCTATAGAAACTGTTACGACG 29  
>miR172c-3p Score: 0.0 R03G\_09195  
Query: 1 AGATATCTTTGACAATGCTGC 21  
|||||  
Sbjct: 244 TCTATAGAAACTGTTACGACG 224  
>miR172c-3p Score: 0.0 R03G\_09921  
Query: 1 AGATATCTTTGACAATGCTGC 21  
|||||  
Sbjct: 244 TCTATAGAAACTGTTACGACG 224  
>miR172c-3p Score: 0.0 R03G\_10046  
Query: 1 AGATATCTTTGACAATGCTGC 21  
|||||  
Sbjct: 244 TCTATAGAAACTGTTACGACG 224  
>miR172c-3p Score: 0.0 R03G\_07674  
Query: 1 AGATATCTTTGACAATGCTGC 21  
|||||  
Sbjct: 244 TCTATAGAAACTGTTACGACG 224  
>miR172c-3p Score: 0.0 R03G\_05618  
Query: 1 AGATATCTTTGACAATGCTGC 21  
|||||  
Sbjct: 238 TCTATAGAAACTGTTACGACG 218  
>miR172c-3p Score: 0.0 R03G\_04699  
Query: 1 AGATATCTTTGACAATGCTGC 21  
|||||  
Sbjct: 244 TCTATAGAAACTGTTACGACG 224  
>miR172c-3p Score: 0.0 R03G\_02234  
Query: 1 AGATATCTTTGACAATGCTGC 21  
|||||  
Sbjct: 49 TCTATAGAAACTGTTACGACG 29  
>miR172c-3p Score: 0.0 R03G\_02837  
Query: 1 AGATATCTTTGACAATGCTGC 21  
|||||

Sbjct: 244 TCTATAGAAACTGTTACGACG 224  
>miR172c-3p Score: 1.0 R03G\_03583  
Query: 1 AGATATCTTTGACAATGCTGC 21  
|||||||\*|||||||  
Sbjct: 49 TCTATAGAACTATTACGACG 29  
>miR172c-3p Score: 0.0 R03G\_03751  
Query: 1 AGATATCTTTGACAATGCTGC 21  
|||||||  
Sbjct: 238 TCTATAGAAACTGTTACGACG 218  
>miR172c-3p Score: 0.0 R03G\_03793  
Query: 1 AGATATCTTTGACAATGCTGC 21  
|||||||  
Sbjct: 244 TCTATAGAAACTGTTACGACG 224  
>miR172c-3p Score: 0.0 R03G\_04125  
Query: 1 AGATATCTTTGACAATGCTGC 21  
|||||||  
Sbjct: 244 TCTATAGAAACTGTTACGACG 224  
>miR172c-3p Score: 0.0 R03G\_04204  
Query: 1 AGATATCTTTGACAATGCTGC 21  
|||||||  
Sbjct: 244 TCTATAGAAACTGTTACGACG 224  
>miR172c-3p Score: 2.5 R03G\_00951  
Query: 1 AGATATCTTTGACAATGCTGC 21  
||||\*|||||||:\*\*|  
Sbjct: 705 TCTATTGAACTGTTAT-TCG 686  
>miR172c-3p Score: 0.0 R03G\_01311  
Query: 1 AGATATCTTTGACAATGCTGC 21  
|||||||  
Sbjct: 244 TCTATAGAAACTGTTACGACG 224  
>miR172c-3p Score: 0.0 R03G\_01930  
Query: 1 AGATATCTTTGACAATGCTGC 21  
|||||||  
Sbjct: 244 TCTATAGAAACTGTTACGACG 224  
>miR172c-3p Score: 0.0 R03G\_17462  
Query: 1 AGATATCTTTGACAATGCTGC 21  
|||||||  
Sbjct: 376 TCTATAGAAACTGTTACGACG 356  
>miR172c-3p Score: 0.0 R03G\_17452  
Query: 1 AGATATCTTTGACAATGCTGC 21  
|||||||  
Sbjct: 244 TCTATAGAAACTGTTACGACG 224  
>miR172c-3p Score: 0.0 R03G\_17426  
Query: 1 AGATATCTTTGACAATGCTGC 21  
|||||||  
Sbjct: 49 TCTATAGAACTGTTACGACG 29

>miR172c-3p Score: 0.0 R03G\_17275  
Query: 1 AGATATCTTTGACAATGCTGC 21  
|||||  
Sbjct: 49 TCTATAGAAACTGTTACGACG 29

>miR7761-3p Score: 2.0 R03G\_14788  
Query: 1 TCTCGAATCAAGGACGCTCTGG 22  
|||||\*||\*|||||  
Sbjct: 259 AGAGCTTAGATCCCGCGAGACC 238

>miR7761-3p Score: 2.0 R03G\_14801  
Query: 1 TCTCGAATCAAGGACGCTCTGG 22  
|||||\*||\*|||||  
Sbjct: 259 AGAGCTTAGATCCCGCGAGACC 238

>miR472-3p Score: 2.0 R03G\_14583  
Query: 1 TTTTGCCTACTCCTCCCATAC 21  
|||||\*||\*||\*|  
Sbjct: 235 AAAACGGATGCGGAGGGAAAG 215

>miR3695 Score: 2.0 R03G\_05881  
Query: 1 TCGTCGTCTTGGTCGTTTGGG 21  
|||||:|\*|\*|  
Sbjct: 1096 AGCAGCAGAACCAGTGA-CGC 1077

>miR3695 Score: 2.5 R03G\_00213  
Query: 1 TCGTCGTCTTGGTCGTTTGGG 21  
|||||\*||:|||||  
Sbjct: 386 AGCAGCAGAAGAAGTAAACCC 366

>miR3510 Score: 2.5 R03G\_09902  
Query: 1 TTAACCATCTTTCGGGACTGAA 22  
\*|||||:|:|\*||\*|  
Sbjct: 1153 CATTGGTAGAAGGTCCT-ACTA 1133

>miR3510 Score: 1.8 R03G\_06495  
Query: 1 TTAACCATCTTTCGGGACTGAA 22  
|||||:|\*||:|  
Sbjct: 1084 AATTGGTAGAAAGTCCAGATTT 1063

>miR842 Score: 2.0 R03G\_12444  
Query: 1 TATGGTCCCAGATCCGTCA-ACC 22  
\*||||:||||:||||\*|||  
Sbjct: 830 TTACCGGGGTTTAGGCAGTATGG 808

>miR7807a-3p Score: 0.0 R03G\_16691  
Query: 1 TGAGGATTTGCATACATAC 19  
|||||  
Sbjct: 284 ACTCCTAAACGTATGTATG 266

>miR7807a-3p Score: 0.0 R03G\_15671  
Query: 1 TGAGGATTTGCATACATAC 19  
|||||  
Sbjct: 284 ACTCCTAAACGTATGTATG 266

>miR7807a-3p Score: 0.0 R03G\_15169

Query: 1 TGAGGATTTGCATACATAC 19  
|||||  
Sbjct: 284 ACTCCTAAACGTATGTATG 266  
>miR7807a-3p Score: 0.0 R03G\_11965  
Query: 1 TGAGGATTTGCATACATAC 19  
|||||  
Sbjct: 284 ACTCCTAAACGTATGTATG 266  
>miR7807a-3p Score: 2.5 R03G\_12385  
Query: 1 TGAGGATTTGCATACATA-C 19  
|||\*||:|||||\*|  
Sbjct: 1403 ACTACTGGACGTATGTATTG 1384  
>miR7807a-3p Score: 2.5 R03G\_11608  
Query: 1 TGAGGATTTGCATACATAC 19  
|||||:||:\*|||||\*|  
Sbjct: 1971 ACTCCTGAATCTATGTA-G 1954  
>miR7807a-3p Score: 2.5 R03G\_10760  
Query: 1 TGAGGATTTGCATACATAC 19  
||||\*||:|||||\*||  
Sbjct: 665 ACTCGTAGACGTATGT-TG 648  
>miR7807a-3p Score: 0.0 R03G\_10873  
Query: 1 TGAGGATTTGCATACATAC 19  
|||||  
Sbjct: 284 ACTCCTAAACGTATGTATG 266  
>miR7807a-3p Score: 0.0 R03G\_10052  
Query: 1 TGAGGATTTGCATACATAC 19  
|||||  
Sbjct: 284 ACTCCTAAACGTATGTATG 266  
>miR7807a-3p Score: 0.0 R03G\_07740  
Query: 1 TGAGGATTTGCATACATAC 19  
|||||  
Sbjct: 284 ACTCCTAAACGTATGTATG 266  
>miR7807a-3p Score: 2.5 R03G\_03206  
Query: 1 TGAGGATTTGCATACATAC 19  
|:|:||||\*|||||\*|  
Sbjct: 528 ATTCTTAAAGGTATGTA-G 511  
>miR7807a-3p Score: 2.5 R03G\_03919  
Query: 1 TGAGGATTTGCATACATAC 19  
||||\*|||||\*||\*|  
Sbjct: 389 ACTCGTAAACGTATCTAAG 371  
>miR7807a-3p Score: 2.5 R03G\_03940  
Query: 1 TGAGGATTTGCATACATA-C 19  
|:||||\*|:|||||\*|  
Sbjct: 449 ATTCCTACGCGTATGTATCG 430  
>miR7807a-3p Score: 0.0 R03G\_01616  
Query: 1 TGAGGATTTGCATACATAC 19



```
|||||
Sbjct: 284 ACTCCTAAACGTATGTATG 266
>miR7807a-3p Score: 2.0 R03G_01786
Query: 1 TGAGGATTTGCATACATAC 19
|||:|||||*||:|
Sbjct: 323 ACTTCTAAACGTAGGTGTG 305
>miR6214 Score: 1.0 R03G_17251
Query: 1 TGACGACGAGAGCCACGATCA 21
|||||*|||||
Sbjct: 407 ACTGCTGCTCTCGCTGCTAGT 387
>miR6214 Score: 2.5 R03G_17255
Query: 1 TGACGACGAGAGCCACGATCA 21
||||*||||*||||*
Sbjct: 2654 ACTGCCGCTCTCGCTGCTAGC 2634
>miR6214 Score: 2.0 R03G_16919
Query: 1 TGACGACGAGAGCCACGATCA 21
||||*||||*|||||
Sbjct: 278 ACTGCCGCTCTCGCTGCTAGT 258
>miR6214 Score: 2.0 R03G_16366
Query: 1 TGACGACGAGAGCCACGATCA 21
||||*||||*|||||
Sbjct: 2699 ACTGCCGCTCTCGCTGCTAGT 2679
>miR6214 Score: 2.5 R03G_15931
Query: 1 TGACGACGAGAGCCACGATCA 21
|||||*|||||*||**
Sbjct: 1313 ACTGCTGCTCTCGGTTTTACC 1293
>miR6214 Score: 2.0 R03G_14563
Query: 1 TGACGACGAGAGCCACGATCA 21
||||*||||*|||||
Sbjct: 266 ACTGCCGCTCTCGCTGCTAGT 246
>miR6214 Score: 2.5 R03G_14273
Query: 1 TGACGACGAGAGCCACGA-TCA 21
|||||*|||||***|*|
Sbjct: 215 ACTGCTGCTCTCGGTGGCCACT 194
>miR6214 Score: 2.5 R03G_13458
Query: 1 TGACGACGAGAGCCACGATCA 21
||*|||||*||||*
Sbjct: 407 ACCGCTGCTCTCGCTGCTAGC 387
>miR6214 Score: 2.2 R03G_11579
Query: 1 TGACGACGAGAGCCACGATCA 21
:|||||*||||*||*
Sbjct: 3530 GCTGCTGCTCTGTGCAAGA 3510
>miR6214 Score: 2.0 R03G_10543
Query: 1 TGACGACGAGAGCCACGATCA 21
||||*||||*|||||
```

Sbjct: 2156 ACTGCCGCTCTCGCTGCTAGT 2136  
>miR6214 Score: 2.0 R03G\_07735  
Query: 1 TGACGACGAGAGCCACGATCA 21  
||||\*|||||\*|||||  
Sbjct: 2603 ACTGCCGCTCTCGCTGCTAGT 2583  
>miR6214 Score: 1.8 R03G\_03008  
Query: 1 TGACGACGAGAGCCACGATCA 21  
|||||||\*|||||\*||  
Sbjct: 1064 ACTGCTGCTCCCGGTGCAGGT 1044  
>miR6214 Score: 1.0 R03G\_01294  
Query: 1 TGACGACGAGAGCCACGATCA 21  
|||||||\*|||||  
Sbjct: 1772 ACTGCTGCTCTCGCTGCTAGT 1752  
>miR5788 Score: 0.0 R03G\_15585  
Query: 1 TGGATAGTTATCAGACTCTAGTA 23  
|||||||  
Sbjct: 2529 ACCTATCAATAGTCTGAGATCAT 2507  
>miR5788 Score: 0.0 R03G\_15250  
Query: 1 TGGATAGTTATCAGACTCTAGTA 23  
|||||||  
Sbjct: 2529 ACCTATCAATAGTCTGAGATCAT 2507  
>miR5788 Score: 0.2 R03G\_14355  
Query: 1 TGGATAGTTATCAGACTCTAGTA 23  
|||||||:||||  
Sbjct: 780 ACCTATCAATAGTCTGAGGTCAT 758  
>miR5788 Score: 0.5 R03G\_13867  
Query: 1 TGGATAGTTATCAGACTCTAGTA 23  
|||||||\*||  
Sbjct: 2490 ACCTATCAATAGTCTGAGATAAT 2468  
>miR5788 Score: 1.5 R03G\_13920  
Query: 1 TGGATAGTTATCAGACTCTAGTA 23  
|||||||\*||:|:|  
Sbjct: 2574 ACCTATCAATAGTCTAAGGTTAT 2552  
>miR5788 Score: 0.0 R03G\_13749  
Query: 1 TGGATAGTTATCAGACTCTAGTA 23  
|||||||  
Sbjct: 1137 ACCTATCAATAGTCTGAGATCAT 1115  
>miR5788 Score: 0.2 R03G\_10558  
Query: 1 TGGATAGTTATCAGACTCTAGTA 23  
|||||||:||||  
Sbjct: 327 ACCTATCAATAGTCTGAGGTCAT 305  
>miR5788 Score: 1.5 R03G\_09965  
Query: 1 TGGATAGTTATCAGACTCTAGTA 23  
|||||||\*||:|:|  
Sbjct: 2574 ACCTATCAATAGTCTAAGGTTAT 2552

>miR5788 Score: 1.5 R03G\_05619  
Query: 1 TGGATAGTTATCAGACTCTAGTA 23  
|||||\*||:|:|  
Sbjct: 717 ACCTATCAATAGTCTAAGGTTAT 695

>miR5788 Score: 1.5 R03G\_06427  
Query: 1 TGGATAGTTATCAGACTCTAGTA 23  
|||||\*||:|:|  
Sbjct: 2166 ACCTATCAATAGTCTAAGGTTAT 2144

>miR5788 Score: 1.5 R03G\_06428  
Query: 1 TGGATAGTTATCAGACTCTAGTA 23  
|||||\*||:|:|  
Sbjct: 1668 ACCTATCAATAGTCTAAGGTTAT 1646

>miR5788 Score: 1.5 R03G\_06442  
Query: 1 TGGATAGTTATCAGACTCTAGTA 23  
|||||\*||:|:|  
Sbjct: 3231 ACCTATCAATAGTCTAAGGTTAT 3209

>miR5788 Score: 0.2 R03G\_05272  
Query: 1 TGGATAGTTATCAGACTCTAGTA 23  
|||||:||||  
Sbjct: 2574 ACCTATCAATAGTCTGAGGTCAT 2552

>miR5788 Score: 1.5 R03G\_02691  
Query: 1 TGGATAGTTATCAGACTCTAGTA 23  
|||||\*||:|:|  
Sbjct: 6063 ACCTATCAATAGTCTAAGGTTAT 6041

>miR5788 Score: 1.5 R03G\_02959  
Query: 1 TGGATAGTTATCAGACTCTAGTA 23  
|||||\*||:|:|  
Sbjct: 2574 ACCTATCAATAGTCTAAGGTTAT 2552

>miR5788 Score: 1.5 R03G\_03547  
Query: 1 TGGATAGTTATCAGACTCTAGTA 23  
|||||\*||:|:|  
Sbjct: 2574 ACCTATCAATAGTCTAAGGTTAT 2552

>miR5788 Score: 0.2 R03G\_04114  
Query: 1 TGGATAGTTATCAGACTCTAGTA 23  
|||||:||||  
Sbjct: 2574 ACCTATCAATAGTCTGAGGTCAT 2552

>miR5788 Score: 0.0 R03G\_00306  
Query: 1 TGGATAGTTATCAGACTCTAGTA 23  
|||||  
Sbjct: 1023 ACCTATCAATAGTCTGAGATCAT 1001

>miR5788 Score: 0.0 R03G\_01613  
Query: 1 TGGATAGTTATCAGACTCTAGTA 23  
|||||  
Sbjct: 825 ACCTATCAATAGTCTGAGATCAT 803

>miR5788 Score: 1.5 R03G\_02221

Query: 1 TGGATAGTTATCAGACTCTAGTA 23  
|||||||\*||:|:|  
Sbjct: 2496 ACCTATCAATAGTCTAAGGTTAT 2474  
>miR5788 Score: 0.2 R03G\_17371

Query: 1 TGGATAGTTATCAGACTCTAGTA 23  
|||||||:||||  
Sbjct: 2529 ACCTATCAATAGTCTGAGGTCAT 2507  
>miR5788 Score: 1.5 R03G\_17326

Query: 1 TGGATAGTTATCAGACTCTAGTA 23  
|||||||\*||:|:|  
Sbjct: 2406 ACCTATCAATAGTCTAAGGTTAT 2384  
>miR5208d Score: 1.5 R03G\_15573

Query: 1 TTTAGTCATAGTTTGTAGGCAA 22  
|\*:|||||  
Sbjct: 1489 ATGTCAGTATCAAACATCCGTT 1468  
>miR5208d Score: 1.5 R03G\_13849

Query: 1 TTTAGTCATAGTTTGTAGGCAA 22  
|\*:|||||  
Sbjct: 1489 ATGTCAGTATCAAACATCCGTT 1468  
>miR5208d Score: 2.5 R03G\_12344

Query: 1 TTTAGTCATAGTTTGTAGGCAA 22  
||:|\*|||:|\*||  
Sbjct: 2523 AAGTGAGTATCAAACATTTCTT 2502  
>miR5208d Score: 1.5 R03G\_10420

Query: 1 TTTAGTCATAGTTTGTAGGCAA 22  
|\*:|||||  
Sbjct: 1489 ATGTCAGTATCAAACATCCGTT 1468  
>miR5208d Score: 1.5 R03G\_10991

Query: 1 TTTAGTCATAGTTTGTAGGCAA 22  
|\*:|||||  
Sbjct: 1489 ATGTCAGTATCAAACATCCGTT 1468  
>miR5208d Score: 1.0 R03G\_05865

Query: 1 TTTAGTCATAGTTTGTAGGCAA 22  
|\*:|||||  
Sbjct: 1489 ATATCAGTATCAAACATCCGTT 1468  
>miR5208d Score: 1.0 R03G\_06502

Query: 1 TTTAGTCATAGTTTGTAGGCAA 22  
|\*:|||||  
Sbjct: 1489 ATATCAGTATCAAACATCCGTT 1468  
>miR5208d Score: 1.0 R03G\_04662

Query: 1 TTTAGTCATAGTTTGTAGGCAA 22  
|\*:|||||  
Sbjct: 1231 ATATCAGTATCAAACATCCGTT 1210  
>miR5208d Score: 1.5 R03G\_02708

Query: 1 TTTAGTCATAGTTTGTAGGCAA 22

|\*:|||||||||||||||||  
Sbjct: 1222 ATGTCAGTATCAAACATCCGTT 1201  
>miR5208d Score: 1.5 R03G\_02966  
Query: 1 TTTAGTCATAGTTTGTAGGCAA 22  
|\*:|||||||||||||||||  
Sbjct: 760 ATGTCAGTATCAAACATCCGTT 739  
>miR5208d Score: 1.5 R03G\_03749  
Query: 1 TTTAGTCATAGTTTGTAGGCAA 22  
|\*:|||||||||||||||||  
Sbjct: 1489 ATGTCAGTATCAAACATCCGTT 1468  
>miR5208d Score: 2.0 R03G\_01056  
Query: 1 TTTAGTCATAGTTTGTAGGCAA 22  
\*\*||||||||||||||||\*\*  
Sbjct: 1384 TCATCAGTATCAAACATCCGTC 1363  
>miR5208d Score: 1.0 R03G\_01733  
Query: 1 TTTAGTCATAGTTTGTAGGCAA 22  
|\*|||||||||||||||||  
Sbjct: 1413 ATATCAGTATCAAACATCCGTT 1392  
>miR5208d Score: 1.5 R03G\_01944  
Query: 1 TTTAGTCATAGTTTGTAGGCAA 22  
|\*:|||||||||||||||||  
Sbjct: 1489 ATGTCAGTATCAAACATCCGTT 1468  
>miR5208d Score: 1.5 R03G\_17446  
Query: 1 TTTAGTCATAGTTTGTAGGCAA 22  
|\*:|||||||||||||||||  
Sbjct: 1489 ATGTCAGTATCAAACATCCGTT 1468  
>miR5208d Score: 1.5 R03G\_17287  
Query: 1 TTTAGTCATAGTTTGTAGGCAA 22  
|\*:|||||||||||||||||  
Sbjct: 1489 ATGTCAGTATCAAACATCCGTT 1468  
>miR6209 Score: 1.0 R03G\_16430  
Query: 1 TGAGCATCAGAAGCTGTGCG 20  
||||||||||||\*|||||||  
Sbjct: 212 ACTCGTAGTCTTAGACACGC 193  
>miR6209 Score: 0.0 R03G\_16144  
Query: 1 TGAGCATCAGAAGCTGTGCG 20  
|||||||||||||||||  
Sbjct: 248 ACTCGTAGTCTTCGACACGC 229  
>miR6209 Score: 0.0 R03G\_14972  
Query: 1 TGAGCATCAGAAGCTGTGCG 20  
|||||||||||||||||  
Sbjct: 179 ACTCGTAGTCTTCGACACGC 160  
>miR6209 Score: 0.5 R03G\_15151  
Query: 1 TGAGCATCAGAAGCTGTGCG 20  
|||||||||||||:|||||||

Sbjct: 269 ACTCGTAGTCTTTGACACGC 250  
>miR6209 Score: 0.0 R03G\_13295  
Query: 1 TGAGCATCAGAAGCTGTGCG 20  
|||||  
Sbjct: 179 ACTCGTAGTCTTCGACACGC 160  
>miR6209 Score: 0.0 R03G\_13702  
Query: 1 TGAGCATCAGAAGCTGTGCG 20  
|||||  
Sbjct: 179 ACTCGTAGTCTTCGACACGC 160  
>miR6209 Score: 1.0 R03G\_13754  
Query: 1 TGAGCATCAGAAGCTGTGCG 20  
|||||\*|||||  
Sbjct: 248 ACTCGTAGTCTTAGACACGC 229  
>miR6209 Score: 0.0 R03G\_13860  
Query: 1 TGAGCATCAGAAGCTGTGCG 20  
|||||  
Sbjct: 248 ACTCGTAGTCTTCGACACGC 229  
>miR6209 Score: 0.0 R03G\_12665  
Query: 1 TGAGCATCAGAAGCTGTGCG 20  
|||||  
Sbjct: 227 ACTCGTAGTCTTCGACACGC 208  
>miR6209 Score: 1.0 R03G\_12672  
Query: 1 TGAGCATCAGAAGCTGTGCG 20  
|||||\*|||||  
Sbjct: 248 ACTCGTAGTCTTAGACACGC 229  
>miR6209 Score: 0.0 R03G\_13000  
Query: 1 TGAGCATCAGAAGCTGTGCG 20  
|||||  
Sbjct: 179 ACTCGTAGTCTTCGACACGC 160  
>miR6209 Score: 1.0 R03G\_13138  
Query: 1 TGAGCATCAGAAGCTGTGCG 20  
|||||\*|||||  
Sbjct: 179 ACTCGTAGTCTTAGACACGC 160  
>miR6209 Score: 1.0 R03G\_12004  
Query: 1 TGAGCATCAGAAGCTGTGCG 20  
|||||\*|||||  
Sbjct: 248 ACTCGTAGTCTTAGACACGC 229  
>miR6209 Score: 1.0 R03G\_12173  
Query: 1 TGAGCATCAGAAGCTGTGCG 20  
|||||\*|||||  
Sbjct: 248 ACTCGTAGTCTTAGACACGC 229  
>miR6209 Score: 2.5 R03G\_12181  
Query: 1 TGAGCATCAGAAGCTGTGCG 20  
\*:|||||\*|||\*|  
Sbjct: 722 TTTCGTAGTCTTCAACAC-C 704

>miR6209 Score: 2.0 R03G\_11253  
Query: 1 TGAGCATCAGAAGCTGTGCG 20  
|||||||\*:|||||\*|  
Sbjct: 794 ACTCGTAGGTTTCGACAC-C 776

>miR6209 Score: 2.5 R03G\_10340  
Query: 1 TGAGCATCAGAAGCTGTGCG 20  
|:||||\*|||||||\*\*  
Sbjct: 467 ATTCGTTGTCTTCGACACAA 448

>miR6209 Score: 0.0 R03G\_09598  
Query: 1 TGAGCATCAGAAGCTGTGCG 20  
|||||||  
Sbjct: 179 ACTCGTAGTCTTCGACACGC 160

>miR6209 Score: 0.5 R03G\_09618  
Query: 1 TGAGCATCAGAAGCTGTGCG 20  
|||||||\*|||\*|  
Sbjct: 233 ACTCGTAGTCTTCGACACAC 214

>miR6209 Score: 1.0 R03G\_09950  
Query: 1 TGAGCATCAGAAGCTGTGCG 20  
|||||||\*|||  
Sbjct: 248 ACTCGTAGTCTTAGACACGC 229

>miR6209 Score: 0.5 R03G\_10034  
Query: 1 TGAGCATCAGAAGCTGTGCG 20  
|||||||:|||||  
Sbjct: 233 ACTCGTAGTCTTTGACACGC 214

>miR6209 Score: 0.5 R03G\_10051  
Query: 1 TGAGCATCAGAAGCTGTGCG 20  
|||||||:|||||  
Sbjct: 233 ACTCGTAGTCTTTGACACGC 214

>miR6209 Score: 1.0 R03G\_10231  
Query: 1 TGAGCATCAGAAGCTGTGCG 20  
|||||||\*|||  
Sbjct: 248 ACTCGTAGTCTTAGACACGC 229

>miR6209 Score: 0.0 R03G\_06740  
Query: 1 TGAGCATCAGAAGCTGTGCG 20  
|||||||  
Sbjct: 179 ACTCGTAGTCTTCGACACGC 160

>miR6209 Score: 2.0 R03G\_07076  
Query: 1 TGAGCATCAGAAGCTGTGCG 20  
|||||||\*:|||||\*|  
Sbjct: 485 ACTCGTAGGTTTCGACAC-C 467

>miR6209 Score: 0.0 R03G\_07111  
Query: 1 TGAGCATCAGAAGCTGTGCG 20  
|||||||  
Sbjct: 248 ACTCGTAGTCTTCGACACGC 229

>miR6209 Score: 1.0 R03G\_07673

Query: 1 TGAGCATCAGAAGCTGTGCG 20  
||||\*|||||||  
Sbjct: 248 ACTCGCAGTCTTCGACACGC 229  
>miR6209 Score: 0.0 R03G\_07716  
Query: 1 TGAGCATCAGAAGCTGTGCG 20  
|||||||  
Sbjct: 233 ACTCGTAGTCTTCGACACGC 214  
>miR6209 Score: 0.5 R03G\_07719  
Query: 1 TGAGCATCAGAAGCTGTGCG 20  
|||||||\*|  
Sbjct: 176 ACTCGTAGTCTTCGACACAC 157  
>miR6209 Score: 1.0 R03G\_07859  
Query: 1 TGAGCATCAGAAGCTGTGCG 20  
|||||||\*|||||  
Sbjct: 143 ACTCGTAGTCTTAGACACGC 124  
>miR6209 Score: 1.0 R03G\_05932  
Query: 1 TGAGCATCAGAAGCTGTGCG 20  
|||||||\*|||||  
Sbjct: 179 ACTCGTAGTCTTAGACACGC 160  
>miR6209 Score: 0.0 R03G\_05934  
Query: 1 TGAGCATCAGAAGCTGTGCG 20  
|||||||  
Sbjct: 179 ACTCGTAGTCTTCGACACGC 160  
>miR6209 Score: 1.0 R03G\_06435  
Query: 1 TGAGCATCAGAAGCTGTGCG 20  
|||||||\*|||||  
Sbjct: 248 ACTCGTAGTCTTAGACACGC 229  
>miR6209 Score: 0.0 R03G\_06719  
Query: 1 TGAGCATCAGAAGCTGTGCG 20  
|||||||  
Sbjct: 179 ACTCGTAGTCTTCGACACGC 160  
>miR6209 Score: 0.0 R03G\_04671  
Query: 1 TGAGCATCAGAAGCTGTGCG 20  
|||||||  
Sbjct: 248 ACTCGTAGTCTTCGACACGC 229  
>miR6209 Score: 2.5 R03G\_05007  
Query: 1 TGAGCATCAGAAGCTGTGCG 20  
:|||\*|||||||\*:||  
Sbjct: 173 GCTCTTAGTCTTCGAC-TGC 155  
>miR6209 Score: 1.0 R03G\_05351  
Query: 1 TGAGCATCAGAAGCTGTGCG 20  
|||||||\*|||||  
Sbjct: 233 ACTCGTAGTCTTAGACACGC 214  
>miR6209 Score: 0.0 R03G\_02701  
Query: 1 TGAGCATCAGAAGCTGTGCG 20



|||||  
Sbjct: 212 ACTCGTAGTCTTCGACACGC 193  
>miR6209 Score: 2.5 R03G\_02730  
Query: 1 TGAGCATCAGAAGCTGTGCG 20  
|||||\*|||||\*|\*|  
Sbjct: 1163 ACTCGTAATCTTCGAC-CAC 1145  
>miR6209 Score: 1.8 R03G\_02745  
Query: 1 TGAGCATCAGAAGCTGTGCG 20  
|\*|||:|||||:|  
Sbjct: 614 AATCGTGGTCTTCGACATGC 595  
>miR6209 Score: 0.5 R03G\_03561  
Query: 1 TGAGCATCAGAAGCTGTGCG 20  
|||||:|||||  
Sbjct: 269 ACTCGTAGTCTTTGACACGC 250  
>miR6209 Score: 0.0 R03G\_03989  
Query: 1 TGAGCATCAGAAGCTGTGCG 20  
|||||  
Sbjct: 179 ACTCGTAGTCTTCGACACGC 160  
>miR6209 Score: 2.0 R03G\_04128  
Query: 1 TGAGCATCAGAAGCTGTGCG 20  
|||||\*||\*|||||  
Sbjct: 248 ACTCGTAGTCCCTCAACACGC 229  
>miR6209 Score: 0.0 R03G\_00252  
Query: 1 TGAGCATCAGAAGCTGTGCG 20  
|||||  
Sbjct: 302 ACTCGTAGTCTTCGACACGC 283  
>miR6209 Score: 2.5 R03G\_00502  
Query: 1 TGAGCATCAGAAGCTGTGCG 20  
|||||\*||\*|||||\*||  
Sbjct: 529 ACTCGTCGTGTTTCGACA-GC 511  
>miR6209 Score: 0.0 R03G\_01310  
Query: 1 TGAGCATCAGAAGCTGTGCG 20  
|||||  
Sbjct: 179 ACTCGTAGTCTTCGACACGC 160  
>miR6209 Score: 0.0 R03G\_01738  
Query: 1 TGAGCATCAGAAGCTGTGCG 20  
|||||  
Sbjct: 179 ACTCGTAGTCTTCGACACGC 160  
>miR6209 Score: 1.0 R03G\_01938  
Query: 1 TGAGCATCAGAAGCTGTGCG 20  
|||||\*|||||  
Sbjct: 248 ACTCGTAGTCTTAGACACGC 229  
>miR6209 Score: 0.0 R03G\_17468  
Query: 1 TGAGCATCAGAAGCTGTGCG 20  
|||||

Sbjct: 179 ACTCGTAGTCTTCGACACGC 160  
>miR6209 Score: 0.5 R03G\_17359  
Query: 1 TGAGCATCAGAAGCTGTGCG 20  
|||||||:|||||||  
Sbjct: 269 ACTCGTAGTCTTTGACACGC 250  
>miR6209 Score: 1.0 R03G\_17333  
Query: 1 TGAGCATCAGAAGCTGTGCG 20  
|||||||\*|||||||  
Sbjct: 248 ACTCGTAGTCTTAGACACGC 229  
>miR6209 Score: 0.0 R03G\_17152  
Query: 1 TGAGCATCAGAAGCTGTGCG 20  
|||||||  
Sbjct: 227 ACTCGTAGTCTTCGACACGC 208  
>miR167a-3p Score: 2.2 R03G\_08157  
Query: 1 GATCATGTTTCGAGTTTCAC 20  
:|\*|||||||:||||\*|  
Sbjct: 822 TTTGTACAAGCGTTAAAG-G 804  
>miR6028 Score: 2.5 R03G\_04077  
Query: 1 TGGAGAGTAAATGACATTCAG 21  
||||\*||||||\*||||\*||  
Sbjct: 402 ACCTATCATTTAATGTAA-TC 383  
>miR6028 Score: 2.0 R03G\_00075  
Query: 1 TGGAGAGTAAATGACATTCAG 21  
||:|||||||:|\*||  
Sbjct: 192 ACTTCTCATTTGTTGTAA-TC 173  
>miR1120c-5p Score: 2.5 R03G\_02870  
Query: 1 TAATATAAAATGCTTTGTTGAC 22  
\*||||\*|||||||\*||  
Sbjct: 688 CTTATACTTTACGAAACAAACG 667  
>miR9726 Score: 0.0 R03G\_16729  
Query: 1 TACAGCGTTATTTTTTCTTC 20  
|||||||  
Sbjct: 105 ATGTCGCAATAAAAAAGAAG 86  
>miR9726 Score: 0.0 R03G\_15141  
Query: 1 TACAGCGTTATTTTTTCTTC 20  
|||||||  
Sbjct: 237 ATGTCGCAATAAAAAAGAAG 218  
>miR9726 Score: 1.5 R03G\_14548  
Query: 1 TACAGCGTTATTTTTTCTTC 20  
||||\*||||||:|||||||  
Sbjct: 272 ATGTCTCAATAAAGAAGAAG 253  
>miR9726 Score: 0.5 R03G\_14560  
Query: 1 TACAGCGTTATTTTTTCTTC 20  
|||||:|||||||  
Sbjct: 105 ATGTCGTAATAAAAAAGAAG 86

>miR9726 Score: 0.5 R03G\_12954  
Query: 1 TACAGCGTTATTTTTTCTTC 20  
|||||:|||||  
Sbjct: 237 ATGTCGTAATAAAAAAGAAG 218

>miR9726 Score: 0.5 R03G\_10762  
Query: 1 TACAGCGTTATTTTTTCTTC 20  
|||||:|||||  
Sbjct: 237 ATGTCGTAATAAAAAAGAAG 218

>miR9726 Score: 0.5 R03G\_10770  
Query: 1 TACAGCGTTATTTTTTCTTC 20  
|||||:|||||  
Sbjct: 237 ATGTCGTAATAAAAAAGAAG 218

>miR9726 Score: 2.5 R03G\_09569  
Query: 1 TACAGCGTTATTTTTTCTTC 20  
\*\*|||||:|||||  
Sbjct: 1011 CGGTCGCAATAGGAAAGAAG 992

>miR9726 Score: 0.0 R03G\_09168  
Query: 1 TACAGCGTTATTTTTTCTTC 20  
|||||:|||||  
Sbjct: 237 ATGTCGCAATAAAAAAGAAG 218

>miR9726 Score: 0.5 R03G\_07129  
Query: 1 TACAGCGTTATTTTTTCTTC 20  
|||||:|||||  
Sbjct: 105 ATGTCGTAATAAAAAAGAAG 86

>miR9726 Score: 2.5 R03G\_04399  
Query: 1 TACAGCGTTATTTTTTCTTC 20  
\*|\*||\*|||||  
Sbjct: 317 TTATCGGAATAAAAAAGAAG 298

>miR9726 Score: 0.0 R03G\_04690  
Query: 1 TACAGCGTTATTTTTTCTTC 20  
|||||:|||||  
Sbjct: 237 ATGTCGCAATAAAAAAGAAG 218

>miR9726 Score: 0.0 R03G\_04787  
Query: 1 TACAGCGTTATTTTTTCTTC 20  
|||||:|||||  
Sbjct: 237 ATGTCGCAATAAAAAAGAAG 218

>miR9726 Score: 0.5 R03G\_05350  
Query: 1 TACAGCGTTATTTTTTCTTC 20  
|||||:|||||  
Sbjct: 105 ATGTCGTAATAAAAAAGAAG 86

>miR9726 Score: 1.0 R03G\_05431  
Query: 1 TACAGCGTTATTTTTTCTTC 20  
|||||:|||||\*|||  
Sbjct: 237 ATGTCGCAATAAAAAAGAAG 218

>miR9726 Score: 0.0 R03G\_02822

Query: 1 TACAGCGTTATTTTTTCTTC 20  
|||||  
Sbjct: 237 ATGTCGCAATAAAAAAGAAG 218  
>miR9726 Score: 2.5 R03G\_03168  
Query: 1 TACAGCGTTATTTTTTCTTC 20  
\*|||||:|||||\*||\*  
Sbjct: 498 TTGTCGTAATAAAAAA-AAT 480  
>miR9726 Score: 2.2 R03G\_00184  
Query: 1 TACAGCGTTATTTTTTCTTC 20  
||||\*||:|||||\*:\*|  
Sbjct: 612 ATGTCTCAGTAAAAAAG-GG 594  
>miR9726 Score: 0.5 R03G\_00304  
Query: 1 TACAGCGTTATTTTTTCTTC 20  
|||||:|||||  
Sbjct: 237 ATGTCGTAATAAAAAAGAAG 218  
>miR9726 Score: 0.5 R03G\_01188  
Query: 1 TACAGCGTTATTTTTTCTTC 20  
|||||:|||||  
Sbjct: 105 ATGTCGTAATAAAAAAGAAG 86  
>miR6182 Score: 1.2 R03G\_07088  
Query: 1 TGGTCTGTGATGGATGCGTT 20  
||\*|||||:|  
Sbjct: 269 ACGAGACACTACCTACGCAG 250  
>miR6182 Score: 2.2 R03G\_06253  
Query: 1 TGGTCTGTGATGGATGCG- TT 20  
|:|||||:|||||:\*\*|  
Sbjct: 1282 ATCAGACGCTACCTACGTTCA 1262  
>miR6182 Score: 2.5 R03G\_04358  
Query: 1 TGGTCTGTGATGGATGCGTT 20  
|||\*|||||\*  
Sbjct: 154 ACCCAACACTACCTACGCAC 135  
>miR6182 Score: 2.5 R03G\_00234  
Query: 1 TGGTCTGTGATGGATGCGTT 20  
|||||\*|||||:\*\*|  
Sbjct: 998 ACCAGAACTACCTATGATA 979  
>miR8179 Score: 0.0 R03G\_17263  
Query: 1 TGATCTGCATTCACTTGATCGT 22  
|||||  
Sbjct: 1106 ACTAGACGTAAGTGAAGTAGCA 1085  
>miR8179 Score: 0.0 R03G\_15868  
Query: 1 TGATCTGCATTCACTTGATCGT 22  
|||||  
Sbjct: 935 ACTAGACGTAAGTGAAGTAGCA 914  
>miR8179 Score: 2.5 R03G\_14486  
Query: 1 TGATCTGCATTCACTTGATCGT 22



Sbjct: 536 ACTAGACGTAAGTGAAGTGA 515  
>miR847-5p Score: 2.5 R03G\_16366  
Query: 1 TATTGATGAGGAGGATGGA 19  
|\*|||:||||:||||\*|  
Sbjct: 1908 ACAACTGCTCCTTCTAC-T 1891  
>miR847-5p Score: 2.5 R03G\_16534  
Query: 1 TATTGATGAGGAGGATGGA 19  
|||\*|||||||:|\*|  
Sbjct: 376 ATACCTACTCCTCCTGT-T 359  
>miR847-5p Score: 2.5 R03G\_15958  
Query: 1 TATTGATGAGGAGGATGGA 19  
\*|:|||||||:|\*|  
Sbjct: 248 TTGACTACTCCTTTTAC-T 231  
>miR847-5p Score: 2.2 R03G\_15183  
Query: 1 TATTGATGAGGAGGATGGA 19  
:\*|||||||\*|||  
Sbjct: 115 GCAACTACTCCTCGTACCT 97  
>miR847-5p Score: 2.2 R03G\_13952  
Query: 1 TATTGATGAGGAGGATGGA 19  
\*\*|||||||:|:|  
Sbjct: 1388 TGAACTACTCCTCTTACTT 1370  
>miR847-5p Score: 2.2 R03G\_14140  
Query: 1 TATTGATGAGGAGGATGGA 19  
|||||\*||\*|||||:|  
Sbjct: 182 ATAACTCCTGCTCCTACTT 164  
>miR847-5p Score: 2.2 R03G\_13674  
Query: 1 TATTGATGAGGAGGATGGA 19  
:|\*|||||||\*|\*  
Sbjct: 223 GTACCTACTCCTCCTACCG 205  
>miR847-5p Score: 1.8 R03G\_13827  
Query: 1 TATTGATGAGGAGGATGGA 19  
\*||\*|||||||:|  
Sbjct: 1926 TTACCTACTCCTCCTACTT 1908  
>miR847-5p Score: 2.5 R03G\_12961  
Query: 1 TATTGATGAGGAGGATGGA 19  
\*\*\*|||||||  
Sbjct: 96 TCTACTACTCCTCCTACCT 78  
>miR847-5p Score: 2.0 R03G\_11915  
Query: 1 TATTGATGAGGAGGATGGA 19  
\*||||:|||||:|\*|  
Sbjct: 416 TTAAGTCTCCTCCTGC-T 399  
>miR847-5p Score: 2.5 R03G\_11952  
Query: 1 TATTGATGAGGAGGATGGA 19  
\*\*\*|||||||  
Sbjct: 141 TCTACTACTCCTCCTACCT 123

>miR847-5p Score: 2.5 R03G\_10744  
Query: 1 TATTGATGAGGAGGATGGA 19  
|\*|||:||||:||||\*|  
Sbjct: 1911 ACAACTGCTCCTTCTAC-T 1894

>miR847-5p Score: 2.5 R03G\_10745  
Query: 1 TATTGATGAGGAGGATGGA 19  
|\*|||:||||:||||\*|  
Sbjct: 879 ACAACTGCTCCTTCTAC-T 862

>miR847-5p Score: 2.5 R03G\_10839  
Query: 1 TATTGATGAGGAGGATGGA 19  
:\*|||||:||||||:|  
Sbjct: 615 GGGACTACTTCTCCTACTT 597

>miR847-5p Score: 2.2 R03G\_11040  
Query: 1 TATTGATGAGGAGGATGGA 19  
|\*|||||:|:||||:|  
Sbjct: 99 ACAACTACTTCTTCTACTT 81

>miR847-5p Score: 2.5 R03G\_09242  
Query: 1 TATTGATGAGGAGGATGGA 19  
|||\*|||||||:|\*|  
Sbjct: 526 ATACCTACTCCTCCTGT-T 509

>miR847-5p Score: 1.8 R03G\_08083  
Query: 1 TATTGATGAGGAGGATGGA 19  
\*||||:||||||:|:|  
Sbjct: 398 TTAAGTCTCCTCCTGCTT 380

>miR847-5p Score: 2.5 R03G\_08484  
Query: 1 TATTGATGAGGAGGATGGA 19  
||||\*||||||\*|\*|  
Sbjct: 152 ATAAGTCTCCTCCTCC-T 135

>miR847-5p Score: 2.5 R03G\_08785  
Query: 1 TATTGATGAGGAGGATGGA 19  
||||\*||||||\*|\*|  
Sbjct: 284 ATAAGTCTCCTCCTCC-T 267

>miR847-5p Score: 2.5 R03G\_07862  
Query: 1 TATTGATGAGGAGGATGGA 19  
|\*|||:||||:||||\*|  
Sbjct: 2022 ACAACTGCTCCTTCTAC-T 2005

>miR847-5p Score: 2.5 R03G\_06497  
Query: 1 TATTGATGAGGAGGATGGA 19  
\*||||:||||:|:|\*|  
Sbjct: 23 TTAAGTCTCCTTCTGCGT 5

>miR847-5p Score: 2.5 R03G\_04817  
Query: 1 TATTGATGAGGAGGATGGA 19  
\*\*|||||:||||||\*|  
Sbjct: 1335 TCAACTACTTCTCCTACCA 1317

>miR847-5p Score: 2.5 R03G\_05205

Query: 1 TATTGATGAGGAGGATGGA 19  
|||\*|||||||::\*|  
Sbjct: 382 ATACCTACTCCTCCTGT-T 365  
>miR847-5p Score: 2.5 R03G\_02989  
Query: 1 TATTGATGAGGAGGATGGA 19  
||||\*|||||||\*|\*|  
Sbjct: 470 ATAACAACCTCCTCCTCC-T 453  
>miR847-5p Score: 0.0 R03G\_03516  
Query: 1 TATTGATGAGGAGGATGGA 19  
|||||||  
Sbjct: 663 ATAACTACTCCTCCTACCT 645  
>miR847-5p Score: 2.5 R03G\_00683  
Query: 1 TATTGATGAGGAGGATGGA 19  
\*\*\*|||||||  
Sbjct: 96 TCTACTACTCCTCCTACCT 78  
>miR847-5p Score: 2.5 R03G\_01278  
Query: 1 TATTGATGAGGAGGATGG-A 19  
||:|||||\*::|||||\*|  
Sbjct: 211 ATGACTACTGTTCCCTACCGT 192  
>miR847-5p Score: 2.5 R03G\_01830  
Query: 1 TATTGATGAGGAGGATGGA 19  
|||:|\*|:|||||||\*|  
Sbjct: 136 ATAGCAATTCCTCCTACCC 118  
>miR847-5p Score: 2.5 R03G\_01875  
Query: 1 TATTGATGAGGAGGATGGA 19  
\*|||||||:||||\*||\*|  
Sbjct: 1136 TTAACTACTTCTCCAAC-T 1119  
>miR847-5p Score: 2.0 R03G\_02104  
Query: 1 TATTGATGAGGAGGATGG-A 19  
|||||||:|:|||||||:|\*|  
Sbjct: 737 ATAACTATTTCTCCTATCGT 718  
>miR5387a Score: 2.0 R03G\_17253  
Query: 1 TAACACGCCGGTCTACAGTATC 22  
|||||||\*||\*|||||  
Sbjct: 1435 ATTGTGCGGCCAGCTGCCATAG 1414  
>miR5387a Score: 2.0 R03G\_17255  
Query: 1 TAACACGCCGGTCTACAGTATC 22  
|||||||\*||\*|||||  
Sbjct: 1435 ATTGTGCGGCCAGCTGCCATAG 1414  
>miR5387a Score: 1.0 R03G\_17217  
Query: 1 TAACACGCCGGTCTACAGTATC 22  
|||||||\*|||||  
Sbjct: 163 ATTGTGCGGCCAGATGCCATAG 142  
>miR5387a Score: 2.0 R03G\_16366  
Query: 1 TAACACGCCGGTCTACAGTATC 22



|||||\*||\*|||||  
Sbjct: 1465 ATTGTGCGGCCAGCTGCCATAG 1444  
>miR5387a Score: 2.0 R03G\_13448  
Query: 1 TAACACGCCGGTCTACAGTATC 22  
|||||\*||\*|||||  
Sbjct: 1450 ATTGTGCGGCCAGCTGCCATAG 1429  
>miR5387a Score: 2.0 R03G\_11979  
Query: 1 TAACACGCCGGTCTACAGTATC 22  
|||||\*||\*|||||  
Sbjct: 1438 ATTGTGCGGCCAGCTGCCATAG 1417  
>miR5387a Score: 2.0 R03G\_10532  
Query: 1 TAACACGCCGGTCTACAGTATC 22  
|||||\*||\*|||||  
Sbjct: 1450 ATTGTGCGGCCAGCTGCCATAG 1429  
>miR5387a Score: 2.0 R03G\_10543  
Query: 1 TAACACGCCGGTCTACAGTATC 22  
|||||\*||\*|||||  
Sbjct: 937 ATTGTGCGGCCAGCTGCCATAG 916  
>miR5387a Score: 2.0 R03G\_10744  
Query: 1 TAACACGCCGGTCTACAGTATC 22  
|||||\*||\*|||||  
Sbjct: 1465 ATTGTGCGGCCAGCTGCCATAG 1444  
>miR5387a Score: 2.0 R03G\_10745  
Query: 1 TAACACGCCGGTCTACAGTATC 22  
|||||\*||\*|||||  
Sbjct: 433 ATTGTGCGGCCAGCTGCCATAG 412  
>miR5387a Score: 2.0 R03G\_10747  
Query: 1 TAACACGCCGGTCTACAGTATC 22  
|||||\*||\*|||||  
Sbjct: 1579 ATTGTGCGGCCAGCTGCCATAG 1558  
>miR5387a Score: 2.0 R03G\_07735  
Query: 1 TAACACGCCGGTCTACAGTATC 22  
|||||\*||\*|||||  
Sbjct: 1384 ATTGTGCGGCCAGCTGCCATAG 1363  
>miR5387a Score: 2.0 R03G\_07862  
Query: 1 TAACACGCCGGTCTACAGTATC 22  
|||||\*||\*|||||  
Sbjct: 1579 ATTGTGCGGCCAGCTGCCATAG 1558  
>miR775 Score: 1.0 R03G\_16429  
Query: 1 TTGCGATGTCTTGCACTCAA 20  
||||\*|||||  
Sbjct: 137 AACGCCACAGAACGTCAGTT 118  
>miR775 Score: 2.5 R03G\_15745  
Query: 1 TTGCGATGTCTTGCACTCAA 20  
||:\*||\*|||||

Sbjct: 122 AATACCACAGAACGTCAGTT 103  
>miR775 Score: 0.5 R03G\_15496  
Query: 1 TTGCGATGTCTTGCAGTCAA 20  
||||:|||||||

Sbjct: 68 AACGTTACAGAACGTCAGTT 49  
>miR775 Score: 1.5 R03G\_14806  
Query: 1 TTGCGATGTCTTGCAGTCAA 20  
||||\*:|||||||

Sbjct: 332 AACGCCGAGAACGTCAGTT 313  
>miR775 Score: 2.0 R03G\_14365  
Query: 1 TTGCGATGTCTTGCAGTCAA 20  
||||\*|||||||\*|||||

Sbjct: 317 AACGCCACAGAACGCCAGTT 298  
>miR775 Score: 1.5 R03G\_14467  
Query: 1 TTGCGATGTCTTGCAGTCAA 20  
||||\*||:|||||||

Sbjct: 122 AACGCCACGGAACGTCAGTT 103  
>miR775 Score: 1.0 R03G\_14722  
Query: 1 TTGCGATGTCTTGCAGTCAA 20  
||||\*|||||||

Sbjct: 425 AACGCCACAGAACGTCAGTT 406  
>miR775 Score: 1.0 R03G\_13903  
Query: 1 TTGCGATGTCTTGCAGTCAA 20  
||||\*|||||||

Sbjct: 425 AACGCCACAGAACGTCAGTT 406  
>miR775 Score: 2.0 R03G\_13574  
Query: 1 TTGCGATGTCTTGCAGTCAA 20  
||||\*||||\*|||||||

Sbjct: 203 AACGCCACATAACGTCAGTT 184  
>miR775 Score: 1.0 R03G\_13664  
Query: 1 TTGCGATGTCTTGCAGTCAA 20  
||||\*|||||||

Sbjct: 425 AACGCCACAGAACGTCAGTT 406  
>miR775 Score: 1.0 R03G\_13672  
Query: 1 TTGCGATGTCTTGCAGTCAA 20  
||||\*|||||||

Sbjct: 425 AACGCCACAGAACGTCAGTT 406  
>miR775 Score: 0.0 R03G\_11486  
Query: 1 TTGCGATGTCTTGCAGTCAA 20  
|||||||

Sbjct: 197 AACGCTACAGAACGTCAGTT 178  
>miR775 Score: 1.0 R03G\_11567  
Query: 1 TTGCGATGTCTTGCAGTCAA 20  
||||\*|||||||

Sbjct: 1277 AACGCCACAGAACGTCAGTT 1258

>miR775 Score: 1.5 R03G\_09279  
Query: 1 TTGCGATGTCTTGCAGTCAA 20  
||||\*|||||||\*  
Sbjct: 191 AACGCCACAGAACGTCAGTC 172

>miR775 Score: 0.0 R03G\_09419  
Query: 1 TTGCGATGTCTTGCAGTCAA 20  
|||||||  
Sbjct: 245 AACGCTACAGAACGTCAGTT 226

>miR775 Score: 2.5 R03G\_09608  
Query: 1 TTGCGATGTCTTGCAGTCAA 20  
|::|||||||\*|\*||  
Sbjct: 758 AGTGCTACAGAACGTAATTT 739

>miR775 Score: 1.0 R03G\_09656  
Query: 1 TTGCGATGTCTTGCAGTCAA 20  
|||||||:|||||||:|||  
Sbjct: 122 AACGCTACGGAACGTCGGTT 103

>miR775 Score: 2.5 R03G\_09821  
Query: 1 TTGCGATGTCTTGCAGTCAA 20  
||||:\*|||||\*|||||||  
Sbjct: 122 AACGTCACAGAAAGTCAGTT 103

>miR775 Score: 0.5 R03G\_09838  
Query: 1 TTGCGATGTCTTGCAGTCAA 20  
||:|||||||  
Sbjct: 197 AATGCTACAGAACGTCAGTT 178

>miR775 Score: 2.5 R03G\_10000  
Query: 1 TTGCGATGTCTTGCAGTCAA 20  
||||\*||||||\*||\*||  
Sbjct: 122 AACGCCACAGAACATCATTT 103

>miR775 Score: 1.0 R03G\_08301  
Query: 1 TTGCGATGTCTTGCAGTCAA 20  
||||\*|||||||  
Sbjct: 350 AACGCCACAGAACGTCAGTT 331

>miR775 Score: 2.5 R03G\_08649  
Query: 1 TTGCGATGTCTTGCAGTCAA 20  
||||\*||:||||\*|||||  
Sbjct: 152 AACGCCACGGAACATCAGTT 133

>miR775 Score: 1.0 R03G\_08906  
Query: 1 TTGCGATGTCTTGCAGTCAA 20  
||||\*|||||||  
Sbjct: 425 AACGCCACAGAACGTCAGTT 406

>miR775 Score: 2.5 R03G\_09032  
Query: 1 TTGCGATGTCTTGCAGTCAA 20  
||||\*|||||:|||||\*  
Sbjct: 117 AACGCCACAGAGTGTCAGTA 98

>miR775 Score: 2.0 R03G\_06838

Query: 1 TTGCGATGTCTTGCAAGTCAA 20  
||||\*||:|||||||\*  
Sbjct: 68 AACGCCACGGAACGTCAGTG 49  
>miR775 Score: 0.5 R03G\_07273  
Query: 1 TTGCGATGTCTTGCAAGTCAA 20  
|||||||\*||  
Sbjct: 122 AACGCTACAGAACGTCATT 103  
>miR775 Score: 1.5 R03G\_07438  
Query: 1 TTGCGATGTCTTGCAAGTCAA 20  
||||\*||:|||||||  
Sbjct: 122 AACGCCACGGAACGTCAGTT 103  
>miR775 Score: 1.0 R03G\_07580  
Query: 1 TTGCGATGTCTTGCAAGTCAA 20  
||||\*|||||||  
Sbjct: 149 AACGCCACAGAACGTCAGTT 130  
>miR775 Score: 1.0 R03G\_07788  
Query: 1 TTGCGATGTCTTGCAAGTCAA 20  
||||\*|||||||  
Sbjct: 374 AACGCCACAGAACGTCAGTT 355  
>miR775 Score: 1.0 R03G\_05133  
Query: 1 TTGCGATGTCTTGCAAGTCAA 20  
||||\*|||||||  
Sbjct: 374 AACGCCACAGAACGTCAGTT 355  
>miR775 Score: 1.0 R03G\_05181  
Query: 1 TTGCGATGTCTTGCAAGTCAA 20  
||||\*|||||||  
Sbjct: 425 AACGCCACAGAACGTCAGTT 406  
>miR775 Score: 1.0 R03G\_05194  
Query: 1 TTGCGATGTCTTGCAAGTCAA 20  
||||\*|||||||  
Sbjct: 425 AACGCCACAGAACGTCAGTT 406  
>miR775 Score: 1.0 R03G\_05303  
Query: 1 TTGCGATGTCTTGCAAGTCAA 20  
||||\*|||||||  
Sbjct: 425 AACGCCACAGAACGTCAGTT 406  
>miR775 Score: 1.0 R03G\_02348  
Query: 1 TTGCGATGTCTTGCAAGTCAA 20  
||||\*|||||||  
Sbjct: 137 AACGCCACAGAACGTCAGTT 118  
>miR775 Score: 1.0 R03G\_02354  
Query: 1 TTGCGATGTCTTGCAAGTCAA 20  
||||\*|||||||  
Sbjct: 425 AACGCCACAGAACGTCAGTT 406  
>miR775 Score: 2.0 R03G\_02936  
Query: 1 TTGCGATGTCTTGCAAGTCAA 20

||||:\*|||||||:|  
Sbjct: 425 AACGTCACAGAACGTCGGTT 406  
>miR775 Score: 1.0 R03G\_04104  
Query: 1 TTGCGATGTCTTGCAGTCAA 20  
||:|||||:|||||||  
Sbjct: 122 AATGCTACGGAACGTCAGTT 103  
>miR775 Score: 1.0 R03G\_04110  
Query: 1 TTGCGATGTCTTGCAGTCAA 20  
||:|||||:|||||||  
Sbjct: 122 AATGCTACGGAACGTCAGTT 103  
>miR775 Score: 2.5 R03G\_00450  
Query: 1 TTGCGATGTCTTGCAGTCAA 20  
|||\*\*|||||||:|  
Sbjct: 1859 AACCAATACAGAACGTCGGTT 1840  
>miR775 Score: 2.5 R03G\_01013  
Query: 1 TTGCGATGTCTTGCAGTCAA 20  
||||\*|||\*|||||:|  
Sbjct: 122 AACGCCACAAAACGTTAGTT 103  
>miR775 Score: 0.0 R03G\_01528  
Query: 1 TTGCGATGTCTTGCAGTCAA 20  
|||||||  
Sbjct: 152 AACGCTACAGAACGTCAGTT 133  
>miR775 Score: 1.0 R03G\_01545  
Query: 1 TTGCGATGTCTTGCAGTCAA 20  
||||\*|||||||  
Sbjct: 389 AACGCCACAGAACGTCAGTT 370  
>miR775 Score: 1.0 R03G\_01636  
Query: 1 TTGCGATGTCTTGCAGTCAA 20  
||||\*|||||||  
Sbjct: 374 AACGCCACAGAACGTCAGTT 355  
>miR775 Score: 2.0 R03G\_01923  
Query: 1 TTGCGATGTCTTGCAGTCAA 20  
||||\*||||||\*|||||  
Sbjct: 374 AACGCCACAGAACATCAGTT 355  
>miR5498 Score: 0.0 R03G\_15718  
Query: 1 TGAGCGCAACCTTGAAGAA 19  
|||||||  
Sbjct: 1286 ACTCGCGTTGGAACCTTCTT 1268  
>miR5498 Score: 0.0 R03G\_15247  
Query: 1 TGAGCGCAACCTTGAAGAA 19  
|||||||  
Sbjct: 731 ACTCGCGTTGGAACCTTCTT 713  
>miR5498 Score: 0.0 R03G\_12931  
Query: 1 TGAGCGCAACCTTGAAGAA 19  
|||||||



>miR5678 Score: 2.0 R03G\_13919  
Query: 1 TTCCATGCATAAGACTTTCC 20  
|||||||:\*\*\*||  
Sbjct: 686 AAGGTACGTATTTCTGAATGG 667

>miR5678 Score: 0.2 R03G\_13720  
Query: 1 TTCCATGCATAAGACTTTCC 20  
|||||||:||  
Sbjct: 371 AAGGTACGTATTCTGAAGGG 352

>miR5678 Score: 0.5 R03G\_13742  
Query: 1 TTCCATGCATAAGACTTTCC 20  
|||||:|||||||  
Sbjct: 494 AAGGTATGTATTCTGAAAGG 475

>miR5678 Score: 0.0 R03G\_13848  
Query: 1 TTCCATGCATAAGACTTTCC 20  
|||||||  
Sbjct: 494 AAGGTACGTATTCTGAAAGG 475

>miR5678 Score: 2.0 R03G\_13858  
Query: 1 TTCCATGCATAAGACTTTCC 20  
|||||||\*\*|||  
Sbjct: 125 AAGGTACGTATCCGGAAAGG 106

>miR5678 Score: 2.0 R03G\_12666  
Query: 1 TTCCATGCATAAGACTTTCC 20  
|||||||\*\*|||  
Sbjct: 125 AAGGTACGTATCCGGAAAGG 106

>miR5678 Score: 2.0 R03G\_12678  
Query: 1 TTCCATGCATAAGACTTTCC 20  
|||||||:\*\*\*||  
Sbjct: 686 AAGGTACGTATTTGGAATGG 667

>miR5678 Score: 2.0 R03G\_12954  
Query: 1 TTCCATGCATAAGACTTTCC 20  
|||||||\*\*|||  
Sbjct: 494 AAGGTACGTATCCGGAAAGG 475

>miR5678 Score: 0.5 R03G\_13151  
Query: 1 TTCCATGCATAAGACTTTCC 20  
|||||||:\*\*\*||  
Sbjct: 494 AAGGTACGTATTCTGAA-GG 476

>miR5678 Score: 2.0 R03G\_13286  
Query: 1 TTCCATGCATAAGACTTTCC 20  
|||||||:\*\*\*||  
Sbjct: 686 AAGGTACGTATTTGGAATGG 667

>miR5678 Score: 1.0 R03G\_12071  
Query: 1 TTCCATGCATAAGACTTTCC 20  
|||||||\*\*|||  
Sbjct: 125 AAGGTACGTATTCGGAAAGG 106

>miR5678 Score: 2.0 R03G\_12659

Query: 1 TTCCATGCATAAGACTTTCC 20  
|||||||:|\*||\*||  
Sbjct: 83 AAGGTACGTATTTCTGAATGG 64  
>miR5678 Score: 2.5 R03G\_11281  
Query: 1 TTCCATGCATAAGACTTTCC 20  
|||||||:|\*||\*||  
Sbjct: 449 AAGGTACGTATTTGGAATAG 430  
>miR5678 Score: 0.2 R03G\_11401  
Query: 1 TTCCATGCATAAGACTTTCC 20  
|||||||:|  
Sbjct: 494 AAGGTACGTATTCTGAAGGG 475  
>miR5678 Score: 1.0 R03G\_11773  
Query: 1 TTCCATGCATAAGACTTTCC 20  
|||||||\*|||  
Sbjct: 494 AAGGTACGTATTCTAAAAGG 475  
>miR5678 Score: 0.2 R03G\_10235  
Query: 1 TTCCATGCATAAGACTTTCC 20  
|||||||:|  
Sbjct: 494 AAGGTACGTATTCTGAAGGG 475  
>miR5678 Score: 2.0 R03G\_10529  
Query: 1 TTCCATGCATAAGACTTTCC 20  
|||||||\*||\*|||  
Sbjct: 125 AAGGTACGTATCCGAAAGG 106  
>miR5678 Score: 0.2 R03G\_10732  
Query: 1 TTCCATGCATAAGACTTTCC 20  
|||||||:|  
Sbjct: 494 AAGGTACGTATTCTGAAGGG 475  
>miR5678 Score: 1.0 R03G\_10762  
Query: 1 TTCCATGCATAAGACTTTCC 20  
|||||||\*|||  
Sbjct: 494 AAGGTACGTATTCGAAAGG 475  
>miR5678 Score: 2.0 R03G\_10763  
Query: 1 TTCCATGCATAAGACTTTCC 20  
|||||||:|\*||\*||  
Sbjct: 494 AAGGTACGTATTTCTGAATGG 475  
>miR5678 Score: 1.0 R03G\_10770  
Query: 1 TTCCATGCATAAGACTTTCC 20  
|||||||\*|||  
Sbjct: 494 AAGGTACGTATTCGAAAGG 475  
>miR5678 Score: 2.0 R03G\_10787  
Query: 1 TTCCATGCATAAGACTTTCC 20  
|||||||:|\*||\*||  
Sbjct: 494 AAGGTACGTATTTCTGAATGG 475  
>miR5678 Score: 0.2 R03G\_09483  
Query: 1 TTCCATGCATAAGACTTTCC 20



|||||:|  
Sbjct: 494 AAGGTACGTATTCTGAAGGG 475  
>miR5678 Score: 0.2 R03G\_09499  
Query: 1 TTCCATGCATAAGACTTTCC 20  
|||||:|  
Sbjct: 494 AAGGTACGTATTCTGAAGGG 475  
>miR5678 Score: 0.2 R03G\_09544  
Query: 1 TTCCATGCATAAGACTTTCC 20  
|||||:|  
Sbjct: 494 AAGGTACGTATTCTGAAGGG 475  
>miR5678 Score: 0.0 R03G\_09607  
Query: 1 TTCCATGCATAAGACTTTCC 20  
|||||  
Sbjct: 494 AAGGTACGTATTCTGAAAGG 475  
>miR5678 Score: 1.5 R03G\_08661  
Query: 1 TTCCATGCATAAGACTTTCC 20  
|||||\*|||\*|  
Sbjct: 494 AAGGTACGTATTCCGAAAAG 475  
>miR5678 Score: 0.0 R03G\_08846  
Query: 1 TTCCATGCATAAGACTTTCC 20  
|||||  
Sbjct: 494 AAGGTACGTATTCTGAAAGG 475  
>miR5678 Score: 2.0 R03G\_08847  
Query: 1 TTCCATGCATAAGACTTTCC 20  
|||||\*|||\*||  
Sbjct: 494 AAGGTACGTATTTCTGAATGG 475  
>miR5678 Score: 1.0 R03G\_09168  
Query: 1 TTCCATGCATAAGACTTTCC 20  
|||||\*|||  
Sbjct: 494 AAGGTACGTATTCGGAAAGG 475  
>miR5678 Score: 1.0 R03G\_07129  
Query: 1 TTCCATGCATAAGACTTTCC 20  
|||||\*|||  
Sbjct: 362 AAGGTACGTATTCGGAAAGG 343  
>miR5678 Score: 0.2 R03G\_07303  
Query: 1 TTCCATGCATAAGACTTTCC 20  
|||||:|  
Sbjct: 494 AAGGTACGTATTCTGAAGGG 475  
>miR5678 Score: 2.5 R03G\_07704  
Query: 3 CCATGCATAAGACTTTCC 20  
|\*|||  
Sbjct: 492 GATACGTATTCTGAAAGG 475  
>miR5678 Score: 0.2 R03G\_07875  
Query: 1 TTCCATGCATAAGACTTTCC 20  
|||||:|

Sbjct: 494 AAGGTACGTATTCTGAAGGG 475  
>miR5678 Score: 0.0 R03G\_05622  
Query: 1 TTCCATGCATAAGACTTTCC 20  
|||||

Sbjct: 494 AAGGTACGTATTCTGAAAGG 475  
>miR5678 Score: 0.0 R03G\_05635  
Query: 1 TTCCATGCATAAGACTTTCC 20  
|||||

Sbjct: 494 AAGGTACGTATTCTGAAAGG 475  
>miR5678 Score: 0.2 R03G\_05915  
Query: 1 TTCCATGCATAAGACTTTCC 20  
|||||

Sbjct: 494 AAGGTACGTATTCTGAAGGG 475  
>miR5678 Score: 0.2 R03G\_06423  
Query: 1 TTCCATGCATAAGACTTTCC 20  
|||||

Sbjct: 548 AAGGTACGTATTCTGAAGGG 529  
>miR5678 Score: 0.2 R03G\_06441  
Query: 1 TTCCATGCATAAGACTTTCC 20  
|||||

Sbjct: 494 AAGGTACGTATTCTGAAGGG 475  
>miR5678 Score: 2.0 R03G\_04690  
Query: 1 TTCCATGCATAAGACTTTCC 20  
|||||\*|\*|

Sbjct: 494 AAGGTACGTATCCGAAAGG 475  
>miR5678 Score: 1.0 R03G\_04787  
Query: 1 TTCCATGCATAAGACTTTCC 20  
|||||\*|

Sbjct: 494 AAGGTACGTATCCGAAAGG 475  
>miR5678 Score: 0.2 R03G\_05336  
Query: 1 TTCCATGCATAAGACTTTCC 20  
|||||

Sbjct: 494 AAGGTACGTATTCTGAAGGG 475  
>miR5678 Score: 2.0 R03G\_05350  
Query: 1 TTCCATGCATAAGACTTTCC 20  
|||||\*|\*|

Sbjct: 362 AAGGTACGTATCCGAAAGG 343  
>miR5678 Score: 2.0 R03G\_05431  
Query: 1 TTCCATGCATAAGACTTTCC 20  
|||||\*|\*|

Sbjct: 494 AAGGTACGTATCCGAAAGG 475  
>miR5678 Score: 0.2 R03G\_02689  
Query: 1 TTCCATGCATAAGACTTTCC 20  
|||||

Sbjct: 494 AAGGTACGTATTCTGAAGGG 475

>miR5678 Score: 1.5 R03G\_02713  
Query: 1 TTCCATGCATAAGACTTTCC 20  
|||||\*||||\*  
Sbjct: 224 AAGGTACGTATTCGGAAAGA 205

>miR5678 Score: 1.0 R03G\_02822  
Query: 1 TTCCATGCATAAGACTTTCC 20  
|||||\*||||  
Sbjct: 494 AAGGTACGTATTCGGAAAGG 475

>miR5678 Score: 0.0 R03G\_03571  
Query: 1 TTCCATGCATAAGACTTTCC 20  
|||||  
Sbjct: 494 AAGGTACGTATTCTGAAAGG 475

>miR5678 Score: 2.0 R03G\_03602  
Query: 1 TTCCATGCATAAGACTTTCC 20  
|||||:|\*||\*||  
Sbjct: 635 AAGGTACGTATTTGGAATGG 616

>miR5678 Score: 1.2 R03G\_03615  
Query: 1 TTCCATGCATAAGACTTTCC 20  
|||||\*||:|  
Sbjct: 494 AAGGTACGTATTCAGAAGGG 475

>miR5678 Score: 2.0 R03G\_03624  
Query: 1 TTCCATGCATAAGACTTTCC 20  
|||||:|\*||\*||  
Sbjct: 494 AAGGTACGTATTTCGAATGG 475

>miR5678 Score: 2.0 R03G\_03764  
Query: 1 TTCCATGCATAAGACTTTCC 20  
|||||\*|\*||||  
Sbjct: 125 AAGGTACGTATCCGGAAAGG 106

>miR5678 Score: 2.0 R03G\_00284  
Query: 1 TTCCATGCATAAGACTTTCC 20  
|||||:|\*||\*||  
Sbjct: 503 AAGGTACGTATTTCGAATGG 484

>miR5678 Score: 1.5 R03G\_00304  
Query: 1 TTCCATGCATAAGACTTTCC 20  
|||||\*||||\*  
Sbjct: 494 AAGGTACGTATTCGGAAAGA 475

>miR5678 Score: 2.0 R03G\_00679  
Query: 1 TTCCATGCATAAGACTTTCC 20  
|||||:|\*||\*||  
Sbjct: 686 AAGGTACGTATTTGGAATGG 667

>miR5678 Score: 0.2 R03G\_00681  
Query: 1 TTCCATGCATAAGACTTTCC 20  
|||||:|  
Sbjct: 494 AAGGTACGTATTCTGAAGGG 475

>miR5678 Score: 2.0 R03G\_00688

Query: 1 TTCCATGCATAAGACTTTCC 20  
|||||||:|\*||\*||  
Sbjct: 494 AAGGTACGTATTTGGAATGG 475  
>miR5678 Score: 1.0 R03G\_01188  
Query: 1 TTCCATGCATAAGACTTTCC 20  
|||||||\*|||||  
Sbjct: 362 AAGGTACGTATTCGAAAGG 343  
>miR5678 Score: 0.2 R03G\_01322  
Query: 1 TTCCATGCATAAGACTTTCC 20  
|||||||:|  
Sbjct: 380 AAGGTACGTATTCTGAAGGG 361  
>miR5678 Score: 0.0 R03G\_01652  
Query: 1 TTCCATGCATAAGACTTTCC 20  
|||||||  
Sbjct: 494 AAGGTACGTATTCTGAAAGG 475  
>miR5678 Score: 0.2 R03G\_01730  
Query: 1 TTCCATGCATAAGACTTTCC 20  
|||||||:|  
Sbjct: 494 AAGGTACGTATTCTGAAGGG 475  
>miR5678 Score: 1.2 R03G\_01956  
Query: 1 TTCCATGCATAAGACTTTCC 20  
|||||||\*|||:|  
Sbjct: 494 AAGGTACGTATTCCGAAGGG 475  
>miR5678 Score: 2.0 R03G\_17408  
Query: 1 TTCCATGCATAAGACTTTCC 20  
|||||||:|\*||\*||  
Sbjct: 494 AAGGTACGTATTTGGAATGG 475  
>miR5678 Score: 0.2 R03G\_17400  
Query: 1 TTCCATGCATAAGACTTTCC 20  
|||||||:|  
Sbjct: 368 AAGGTACGTATTCTGAAGGG 349  
>miR5678 Score: 0.2 R03G\_17382  
Query: 1 TTCCATGCATAAGACTTTCC 20  
|||||||:|  
Sbjct: 494 AAGGTACGTATTCTGAAGGG 475  
>miR5678 Score: 1.2 R03G\_17285  
Query: 1 TTCCATGCATAAGACTTTCC 20  
|||||||\*|||:|  
Sbjct: 494 AAGGTACGTATTCCGAAGGG 475  
>miR5261 Score: 2.5 R03G\_07791  
Query: 1 TCATGTCAGATGCTTTGGTCT 21  
|||||||:|\*|||:|\*|  
Sbjct: 517 AGTACAGTTTAGGAAGCCA-A 498  
>miR8658 Score: 2.0 R03G\_08552  
Query: 1 TTGACAAAGTACAGAGACCAT 21

\*|||||||:||||||\*|||  
Sbjct: 1183 CACTGTTTTGTGTCTCTCGTA 1163  
>miR8658 Score: 1.5 R03G\_08999  
Query: 1 TTGACAAAGTACAGAGACCAT 21  
|||||||:|\*|||||||  
Sbjct: 435 AACTGTTTCGTATCTCTGGTA 415  
>miR8658 Score: 2.0 R03G\_03092  
Query: 1 TTGACAAAGTACAGAGACCAT 21  
\*|||||||:||||||\*|||  
Sbjct: 1183 CACTGTTTTGTGTCTCTCGTA 1163  
>miR2111 Score: 0.0 R03G\_15290  
Query: 1 TAAACTGTGTTTGGGTTTGG 20  
|||||||  
Sbjct: 186 ATTTGACACAAACCCAAACC 167  
>miR2111 Score: 0.0 R03G\_15497  
Query: 1 TAAACTGTGTTTGGGTTTGG 20  
|||||||  
Sbjct: 186 ATTTGACACAAACCCAAACC 167  
>miR2111 Score: 0.5 R03G\_13307  
Query: 1 TAAACTGTGTTTGGGTTTGG 20  
|||||||\*||  
Sbjct: 219 ATTTGACACAAACCCAAACCC 200  
>miR2111 Score: 0.5 R03G\_12685  
Query: 1 TAAACTGTGTTTGGGTTTGG 20  
|||||:|||||||  
Sbjct: 240 ATTTGATACAAACCCAAACC 221  
>miR2111 Score: 0.8 R03G\_13022  
Query: 1 TAAACTGTGTTTGGGTTTGG 20  
|||||||:|||||||  
Sbjct: 258 ATTTGACACGAACCCAAACT 239  
>miR2111 Score: 0.5 R03G\_12243  
Query: 1 TAAACTGTGTTTGGGTTTGG 20  
|||||:|||||||  
Sbjct: 258 ATTTGATACAAACCCAAACC 239  
>miR2111 Score: 0.0 R03G\_12446  
Query: 1 TAAACTGTGTTTGGGTTTGG 20  
|||||||  
Sbjct: 258 ATTTGACACAAACCCAAACC 239  
>miR2111 Score: 2.0 R03G\_11292  
Query: 1 TAAACTGTGTTTGGGTTTGG 20  
|||||||\*:|||\*  
Sbjct: 3314 ATTTGACACAAACATAAACA 3295  
>miR2111 Score: 2.5 R03G\_10271  
Query: 1 TAAACTGTGTTTGGGTTTGG 20  
|||||||:|\*:\*:

Sbjct: 929 ATTTGACACAAACCTA-TTT 911  
>miR2111 Score: 2.0 R03G\_10368  
Query: 1 TAAACTGTGTTTGGGTTTGG 20  
\*|||||\*|||||\*  
Sbjct: 8723 TTTTGACACAAACGCAAACG 8704  
>miR2111 Score: 0.5 R03G\_10657  
Query: 1 TAAACTGTGTTTGGGTTTGG 20  
|||||:||||  
Sbjct: 258 ATTTGACACAAACCCGAACC 239  
>miR2111 Score: 2.5 R03G\_10979  
Query: 1 TAAACTGTGTTTGGGTTT-GG 20  
||||\*||:|||||\*||  
Sbjct: 24 ATTTGCTACGAACCCAAAGCC 4  
>miR2111 Score: 1.0 R03G\_08447  
Query: 1 TAAACTGTGTTTGGGTTTGG 20  
|||||\*|||||  
Sbjct: 258 ATTTGACACAAACCCAAAACC 239  
>miR2111 Score: 0.2 R03G\_09087  
Query: 1 TAAACTGTGTTTGGGTTTGG 20  
|||||:|||||  
Sbjct: 258 ATTTGACACAAACCCAAACT 239  
>miR2111 Score: 0.0 R03G\_05724  
Query: 1 TAAACTGTGTTTGGGTTTGG 20  
|||||:|||||  
Sbjct: 219 ATTTGACACAAACCCAAACC 200  
>miR2111 Score: 2.5 R03G\_06640  
Query: 1 TAAACTGTGTTTGGGTTTGG 20  
||||\*||\*|||||\*|  
Sbjct: 884 ATTTGTCACCTAACCCAAAAC 865  
>miR2111 Score: 0.0 R03G\_04502  
Query: 1 TAAACTGTGTTTGGGTTTGG 20  
|||||:|||||  
Sbjct: 258 ATTTGACACAAACCCAAACC 239  
>miR2111 Score: 0.0 R03G\_02942  
Query: 1 TAAACTGTGTTTGGGTTTGG 20  
|||||:|||||  
Sbjct: 258 ATTTGACACAAACCCAAACC 239  
>miR2111 Score: 0.0 R03G\_03523  
Query: 1 TAAACTGTGTTTGGGTTTGG 20  
|||||:|||||  
Sbjct: 258 ATTTGACACAAACCCAAACC 239  
>miR2111 Score: 0.8 R03G\_03971  
Query: 1 TAAACTGTGTTTGGGTTTGG 20  
|||||:|||||:|||||  
Sbjct: 258 ATTTGACACGAACCCAAACT 239

>miR2111 Score: 0.0 R03G\_04017  
Query: 1 TAAACTGTGTTGGGTTTGG 20  
|||||  
Sbjct: 258 ATTTGACACAAACCCAAACC 239

>miR2111 Score: 2.0 R03G\_00850  
Query: 1 TAAACTGTGTTGGGTTTGG 20  
||||||\*|||:||\*||  
Sbjct: 184 ATTTGACACCAACTCAA-CC 166

>miR2111 Score: 0.0 R03G\_01530  
Query: 1 TAAACTGTGTTGGGTTTGG 20  
|||||  
Sbjct: 258 ATTTGACACAAACCCAAACC 239

>miR7817a Score: 0.0 R03G\_17165  
Query: 1 TTTGGTTGAACTTGTCTCGAGAA 23  
|||||  
Sbjct: 739 AAACCAACTTGAACAGAGCTCTT 717

>miR7817a Score: 0.5 R03G\_17021  
Query: 1 TTTGGTTGAACTTGTCTCGAGAA 23  
|||||\*  
Sbjct: 4198 AAACCAACTTGAACAGAGCTCTC 4176

>miR7817a Score: 0.5 R03G\_16693  
Query: 1 TTTGGTTGAACTTGTCTCGAGAA 23  
|||||\*  
Sbjct: 4363 AAACCAACTTGAACAGAGCTCTG 4341

>miR7817a Score: 0.0 R03G\_16361  
Query: 1 TTTGGTTGAACTTGTCTCGAGAA 23  
|||||  
Sbjct: 4198 AAACCAACTTGAACAGAGCTCTT 4176

>miR7817a Score: 0.5 R03G\_16539  
Query: 1 TTTGGTTGAACTTGTCTCGAGAA 23  
|||||\*  
Sbjct: 4255 AAACCAACTTGAACAGAGCTCTG 4233

>miR7817a Score: 0.0 R03G\_13918  
Query: 1 TTTGGTTGAACTTGTCTCGAGAA 23  
|||||  
Sbjct: 4363 AAACCAACTTGAACAGAGCTCTT 4341

>miR7817a Score: 0.0 R03G\_14347  
Query: 1 TTTGGTTGAACTTGTCTCGAGAA 23  
|||||  
Sbjct: 4294 AAACCAACTTGAACAGAGCTCTT 4272

>miR7817a Score: 0.5 R03G\_12673  
Query: 1 TTTGGTTGAACTTGTCTCGAGAA 23  
|||||\*  
Sbjct: 3499 AAACCAACTTGAACAGAGCTCTC 3477

>miR7817a Score: 0.5 R03G\_12677

Query: 1 TTTGGTTGAACTTGTCTCGAGAA 23  
|||||||\*  
Sbjct: 4198 AAACCAACTTGAACAGAGCTCTC 4176  
>miR7817a Score: 0.0 R03G\_12527

Query: 1 TTTGGTTGAACTTGTCTCGAGAA 23  
|||||||  
Sbjct: 4363 AAACCAACTTGAACAGAGCTCTT 4341  
>miR7817a Score: 0.0 R03G\_12530

Query: 1 TTTGGTTGAACTTGTCTCGAGAA 23  
|||||||  
Sbjct: 181 AAACCAACTTGAACAGAGCTCTT 159  
>miR7817a Score: 0.5 R03G\_12538

Query: 1 TTTGGTTGAACTTGTCTCGAGAA 23  
|||||||\*  
Sbjct: 4255 AAACCAACTTGAACAGAGCTCTC 4233  
>miR7817a Score: 2.2 R03G\_11232

Query: 1 TTTGGTTGAACTTGTCTCGAGAA 23  
|||\*||:|||||||\*|:|  
Sbjct: 28 AAACGAATTTGAACAGAGATTTT 6  
>miR7817a Score: 0.5 R03G\_11473

Query: 1 TTTGGTTGAACTTGTCTCGAGAA 23  
|||||||\*  
Sbjct: 181 AAACCAACTTGAACAGAGCTCTG 159  
>miR7817a Score: 0.5 R03G\_10804

Query: 1 TTTGGTTGAACTTGTCTCGAGAA 23  
|||||||\*  
Sbjct: 4204 AAACCAACTTGAACAGAGCTCTC 4182  
>miR7817a Score: 0.0 R03G\_09493

Query: 1 TTTGGTTGAACTTGTCTCGAGAA 23  
|||||||  
Sbjct: 2911 AAACCAACTTGAACAGAGCTCTT 2889  
>miR7817a Score: 0.5 R03G\_09547

Query: 1 TTTGGTTGAACTTGTCTCGAGAA 23  
|||||||\*  
Sbjct: 4198 AAACCAACTTGAACAGAGCTCTC 4176  
>miR7817a Score: 0.5 R03G\_08107

Query: 1 TTTGGTTGAACTTGTCTCGAGAA 23  
|||||||\*  
Sbjct: 721 AAACCAACTTGAACAGAGCTCTG 699  
>miR7817a Score: 0.0 R03G\_08831

Query: 1 TTTGGTTGAACTTGTCTCGAGAA 23  
|||||||  
Sbjct: 109 AAACCAACTTGAACAGAGCTCTT 87  
>miR7817a Score: 0.5 R03G\_07311

Query: 1 TTTGGTTGAACTTGTCTCGAGAA 23



|||||\*  
Sbjct: 4204 AAACCAACTTGAACAGAGCTCTC 4182  
>miR7817a Score: 0.5 R03G\_06425  
Query: 1 TTTGGTTGAACTTGTCTCGAGAA 23  
|||||\*  
Sbjct: 4198 AAACCAACTTGAACAGAGCTCTC 4176  
>miR7817a Score: 0.5 R03G\_04933  
Query: 1 TTTGGTTGAACTTGTCTCGAGAA 23  
|||||\*  
Sbjct: 4198 AAACCAACTTGAACAGAGCTCTC 4176  
>miR7817a Score: 0.5 R03G\_05330  
Query: 1 TTTGGTTGAACTTGTCTCGAGAA 23  
|||||\*  
Sbjct: 4198 AAACCAACTTGAACAGAGCTCTC 4176  
>miR7817a Score: 0.5 R03G\_05344  
Query: 1 TTTGGTTGAACTTGTCTCGAGAA 23  
|||||\*  
Sbjct: 4024 AAACCAACTTGAACAGAGCTCTC 4002  
>miR7817a Score: 0.5 R03G\_05514  
Query: 1 TTTGGTTGAACTTGTCTCGAGAA 23  
|||||\*  
Sbjct: 712 AAACCAACTTGAACAGAGCTCTC 690  
>miR7817a Score: 0.5 R03G\_02704  
Query: 1 TTTGGTTGAACTTGTCTCGAGAA 23  
|||||\*  
Sbjct: 4198 AAACCAACTTGAACAGAGCTCTC 4176  
>miR7817a Score: 0.5 R03G\_02820  
Query: 1 TTTGGTTGAACTTGTCTCGAGAA 23  
|||||\*  
Sbjct: 181 AAACCAACTTGAACAGAGCTCTG 159  
>miR7817a Score: 0.0 R03G\_03618  
Query: 1 TTTGGTTGAACTTGTCTCGAGAA 23  
|||||  
Sbjct: 181 AAACCAACTTGAACAGAGCTCTT 159  
>miR7817a Score: 0.5 R03G\_03765  
Query: 1 TTTGGTTGAACTTGTCTCGAGAA 23  
||||:|||||  
Sbjct: 181 AACTAACTTGAACAGAGCTCTT 159  
>miR7817a Score: 0.5 R03G\_03778  
Query: 1 TTTGGTTGAACTTGTCTCGAGAA 23  
|||||\*  
Sbjct: 4156 AAACCAACTTGAACAGAGCTCTC 4134  
>miR7817a Score: 0.0 R03G\_04126  
Query: 1 TTTGGTTGAACTTGTCTCGAGAA 23  
|||||

Sbjct: 4357 AAACCAACTTGAACAGAGCTCTT 4335  
>miR7817a Score: 0.5 R03G\_00239  
Query: 1 TTTGGTTGAACTTGTCTCGAGAA 23  
|||||\*  
Sbjct: 718 AAACCAACTTGAACAGAGCTCTG 696  
>miR7817a Score: 0.0 R03G\_00298  
Query: 1 TTTGGTTGAACTTGTCTCGAGAA 23  
|||||  
Sbjct: 718 AAACCAACTTGAACAGAGCTCTT 696  
>miR7817a Score: 0.5 R03G\_00701  
Query: 1 TTTGGTTGAACTTGTCTCGAGAA 23  
|||||\*  
Sbjct: 109 AAACCAACTTGAACAGAGCTCTG 87  
>miR7817a Score: 2.5 R03G\_00973  
Query: 1 TTTGGTTGAACTTGTCTCGAGAA 23  
|||||\*||\*||\*  
Sbjct: 219 AAACCAACATGAACAGAAC-CTA 198  
>miR7817a Score: 0.0 R03G\_01614  
Query: 1 TTTGGTTGAACTTGTCTCGAGAA 23  
|||||  
Sbjct: 4204 AAACCAACTTGAACAGAGCTCTT 4182  
>miR7817a Score: 0.5 R03G\_01937  
Query: 1 TTTGGTTGAACTTGTCTCGAGAA 23  
|||||\*  
Sbjct: 181 AAACCAACTTGAACAGAGCTCTG 159  
>miR7817a Score: 0.5 R03G\_01966  
Query: 1 TTTGGTTGAACTTGTCTCGAGAA 23  
|||||\*  
Sbjct: 1246 AAACCAACTTGAACAGAGCTCTG 1224  
>miR7817a Score: 0.5 R03G\_17422  
Query: 1 TTTGGTTGAACTTGTCTCGAGAA 23  
|||||\*  
Sbjct: 3499 AAACCAACTTGAACAGAGCTCTC 3477  
>miR8581 Score: 2.5 R03G\_00004  
Query: 1 TAGAGAATTTTGTAGACAACTG 22  
:|||||:|\*||\*|:  
Sbjct: 142 GTCTCTTAAACATTTATT-AT 122  
>miR170-5p Score: 2.5 R03G\_04511  
Query: 1 TATTGGCCTGGTTCCTCAG 20  
\*\*|||:|||||\*||  
Sbjct: 752 CGAACTGGACCAAGTGAATC 733  
>miR9761 Score: 1.2 R03G\_17266  
Query: 1 TGAAGGATCAGGATATGCTTGT 22  
|||||:|||:|||||:  
Sbjct: 136 ACTTCCTGGTCTTATACGAACG 115

>miR9761 Score: 0.8 R03G\_17237  
Query: 1 TGAAGGATCAGGATATGCTTGT 22  
|||||||:|||||||:  
Sbjct: 136 ACTTCCTGGTCCTATACGAACG 115

>miR9761 Score: 0.8 R03G\_17208  
Query: 1 TGAAGGATCAGGATATGCTTGT 22  
|||||||:|||||||:  
Sbjct: 286 ACTTCCTGGTCCTATACGAACG 265

>miR9761 Score: 1.8 R03G\_16894  
Query: 1 TGAAGGATCAGGATATGCTTGT 22  
||||\*||:|||||||:  
Sbjct: 133 ACTTACTGGTCCTATACGAACG 112

>miR9761 Score: 0.8 R03G\_16695  
Query: 1 TGAAGGATCAGGATATGCTTGT 22  
|||||||:|||||||:  
Sbjct: 64 ACTTCCTGGTCCTATACGAACG 43

>miR9761 Score: 0.8 R03G\_16701  
Query: 1 TGAAGGATCAGGATATGCTTGT 22  
|||||||:|||||||:  
Sbjct: 328 ACTTCCTGGTCCTATACGAACG 307

>miR9761 Score: 0.8 R03G\_14973  
Query: 1 TGAAGGATCAGGATATGCTTGT 22  
|||||||:|||||||:  
Sbjct: 136 ACTTCCTGGTCCTATACGAACG 115

>miR9761 Score: 0.8 R03G\_14985  
Query: 1 TGAAGGATCAGGATATGCTTGT 22  
|||||||:|||||||:  
Sbjct: 136 ACTTCCTGGTCCTATACGAACG 115

>miR9761 Score: 1.8 R03G\_14993  
Query: 1 TGAAGGATCAGGATATGCTTGT 22  
||||\*||:|||||||:  
Sbjct: 136 ACTTACTGGTCCTATACGAACG 115

>miR9761 Score: 0.8 R03G\_14999  
Query: 1 TGAAGGATCAGGATATGCTTGT 22  
|||||||:|||||||:  
Sbjct: 136 ACTTCCTGGTCCTATACGAACG 115

>miR9761 Score: 0.8 R03G\_15156  
Query: 1 TGAAGGATCAGGATATGCTTGT 22  
|||||||:|||||||:  
Sbjct: 136 ACTTCCTGGTCCTATACGAACG 115

>miR9761 Score: 0.8 R03G\_14360  
Query: 1 TGAAGGATCAGGATATGCTTGT 22  
|||||||:|||||||:  
Sbjct: 136 ACTTCCTGGTCCTATACGAACG 115

>miR9761 Score: 0.8 R03G\_13715

Query: 1 TGAAGGATCAGGATATGCTTGT 22  
|||||||:|||||||:  
Sbjct: 64 ACTTCCTGGTCCTATACGAACG 43  
>miR9761 Score: 0.8 R03G\_13731  
Query: 1 TGAAGGATCAGGATATGCTTGT 22  
|||||||:|||||||:  
Sbjct: 349 ACTTCCTGGTCCTATACGAACG 328  
>miR9761 Score: 1.0 R03G\_13759  
Query: 1 TGAAGGATCAGGATATGCTTGT 22  
|||||||:|||||||\*|||  
Sbjct: 136 ACTTCCTGGTCCTATACTAACA 115  
>miR9761 Score: 2.5 R03G\_12616  
Query: 1 TGAAGGATCAGGATATGCTTGT 22  
\*|||||||:|:|\*|||\*  
Sbjct: 375 TCTTCCTAGTCCTGTAT-AACT 355  
>miR9761 Score: 1.2 R03G\_11277  
Query: 1 TGAAGGATCAGGATATGCTTGT 22  
|||||||:|||:|||||||:  
Sbjct: 136 ACTTCCTGGTCCTATACGAACG 115  
>miR9761 Score: 0.5 R03G\_10527  
Query: 1 TGAAGGATCAGGATATGCTTGT 22  
|||||||:|||||||:  
Sbjct: 229 ACTTCCTGGTCCTATACGAACA 208  
>miR9761 Score: 0.8 R03G\_10553  
Query: 1 TGAAGGATCAGGATATGCTTGT 22  
|||||||:|||||||:  
Sbjct: 235 ACTTCCTGGTCCTATACGAACG 214  
>miR9761 Score: 0.8 R03G\_10559  
Query: 1 TGAAGGATCAGGATATGCTTGT 22  
|||||||:|||||||:  
Sbjct: 235 ACTTCCTGGTCCTATACGAACG 214  
>miR9761 Score: 0.8 R03G\_09543  
Query: 1 TGAAGGATCAGGATATGCTTGT 22  
|||||||:|||||||:  
Sbjct: 193 ACTTCCTGGTCCTATACGAACG 172  
>miR9761 Score: 0.8 R03G\_09611  
Query: 1 TGAAGGATCAGGATATGCTTGT 22  
|||||||:|||||||:  
Sbjct: 85 ACTTCCTGGTCCTATACGAACG 64  
>miR9761 Score: 1.5 R03G\_09962  
Query: 1 TGAAGGATCAGGATATGCTTGT 22  
||||\*|:|||||||:  
Sbjct: 55 ACTTCGTGGTCCTATACGAACA 34  
>miR9761 Score: 1.5 R03G\_09968  
Query: 1 TGAAGGATCAGGATATGCTTGT 22

||||\*|:|||||||  
Sbjct: 55 ACTTCGTGGTCCTATACGAACA 34  
>miR9761 Score: 1.8 R03G\_10037  
Query: 1 TGAAGGATCAGGATATGCTTGT 22  
||||\*|:|||||||  
Sbjct: 277 ACTTCGTGGTCCTATACGAACG 256  
>miR9761 Score: 0.8 R03G\_08840  
Query: 1 TGAAGGATCAGGATATGCTTGT 22  
|||||:|||||||  
Sbjct: 292 ACTTCCTGGTCCTATACGAACG 271  
>miR9761 Score: 0.8 R03G\_06738  
Query: 1 TGAAGGATCAGGATATGCTTGT 22  
|||||:|||||||  
Sbjct: 136 ACTTCCTGGTCCTATACGAACG 115  
>miR9761 Score: 0.8 R03G\_07025  
Query: 1 TGAAGGATCAGGATATGCTTGT 22  
|||||:|||||||  
Sbjct: 85 ACTTCCTGGTCCTATACGAACG 64  
>miR9761 Score: 0.8 R03G\_07680  
Query: 1 TGAAGGATCAGGATATGCTTGT 22  
|||||:|||||||  
Sbjct: 136 ACTTCCTGGTCCTATACGAACG 115  
>miR9761 Score: 0.8 R03G\_07703  
Query: 1 TGAAGGATCAGGATATGCTTGT 22  
|||||:|||||||  
Sbjct: 292 ACTTCCTGGTCCTATACGAACG 271  
>miR9761 Score: 0.8 R03G\_07857  
Query: 1 TGAAGGATCAGGATATGCTTGT 22  
|||||:|||||||  
Sbjct: 292 ACTTCCTGGTCCTATACGAACG 271  
>miR9761 Score: 0.8 R03G\_05633  
Query: 1 TGAAGGATCAGGATATGCTTGT 22  
|||||:|||||||  
Sbjct: 85 ACTTCCTGGTCCTATACGAACG 64  
>miR9761 Score: 0.8 R03G\_06443  
Query: 1 TGAAGGATCAGGATATGCTTGT 22  
|||||:|||||||  
Sbjct: 136 ACTTCCTGGTCCTATACGAACG 115  
>miR9761 Score: 0.8 R03G\_04687  
Query: 1 TGAAGGATCAGGATATGCTTGT 22  
|||||:|||||||  
Sbjct: 136 ACTTCCTGGTCCTATACGAACG 115  
>miR9761 Score: 1.8 R03G\_05518  
Query: 1 TGAAGGATCAGGATATGCTTGT 22  
|||||:|||||\*|:|||||

Sbjct: 55 ACTTCCTGGTCCTATTCGAACG 34  
>miR9761 Score: 0.8 R03G\_03581  
Query: 1 TGAAGGATCAGGATATGCTTGT 22  
|||||||:|||||||:  
Sbjct: 136 ACTTCCTGGTCCTATAACGAACG 115  
>miR9761 Score: 0.8 R03G\_03789  
Query: 1 TGAAGGATCAGGATATGCTTGT 22  
|||||||:|||||||:  
Sbjct: 136 ACTTCCTGGTCCTATAACGAACG 115  
>miR9761 Score: 0.8 R03G\_03807  
Query: 1 TGAAGGATCAGGATATGCTTGT 22  
|||||||:|||||||:  
Sbjct: 64 ACTTCCTGGTCCTATAACGAACG 43  
>miR9761 Score: 0.8 R03G\_03809  
Query: 1 TGAAGGATCAGGATATGCTTGT 22  
|||||||:|||||||:  
Sbjct: 64 ACTTCCTGGTCCTATAACGAACG 43  
>miR9761 Score: 0.8 R03G\_00253  
Query: 1 TGAAGGATCAGGATATGCTTGT 22  
|||||||:|||||||:  
Sbjct: 136 ACTTCCTGGTCCTATAACGAACG 115  
>miR9761 Score: 0.8 R03G\_00297  
Query: 1 TGAAGGATCAGGATATGCTTGT 22  
|||||||:|||||||:  
Sbjct: 136 ACTTCCTGGTCCTATAACGAACG 115  
>miR9761 Score: 0.8 R03G\_01202  
Query: 1 TGAAGGATCAGGATATGCTTGT 22  
|||||||:|||||||:  
Sbjct: 136 ACTTCCTGGTCCTATAACGAACG 115  
>miR9761 Score: 0.8 R03G\_17364  
Query: 1 TGAAGGATCAGGATATGCTTGT 22  
|||||||:|||||||:  
Sbjct: 292 ACTTCCTGGTCCTATAACGAACG 271  
>miR9761 Score: 1.2 R03G\_17349  
Query: 1 TGAAGGATCAGGATATGCTTGT 22  
|||||||:|||:|||||||:  
Sbjct: 133 ACTTCCTGGTCCTATAACGAACG 112  
>miR9761 Score: 1.2 R03G\_17304  
Query: 1 TGAAGGATCAGGATATGCTTGT 22  
|||||||:|||:|||||||:  
Sbjct: 136 ACTTCCTGGTCCTATAACGAACG 115  
>miR9761 Score: 0.8 R03G\_17153  
Query: 1 TGAAGGATCAGGATATGCTTGT 22  
|||||||:|||||||:  
Sbjct: 136 ACTTCCTGGTCCTATAACGAACG 115

>miR399f Score: 2.0 R03G\_16425  
Query: 1 TGCCAACGCGATTTGTCCTG 20  
\*|||||:||\*|||||||  
Sbjct: 36 TCGGTTGTGCCAAACAGGAC 17

>miR399f Score: 2.0 R03G\_16556  
Query: 1 TGCCAACGCGATTTGTCCTG 20  
\*|||||||\*|||\*|  
Sbjct: 36 CCGGTTGCGCTATACAGGCC 17

>miR399f Score: 0.0 R03G\_16135  
Query: 1 TGCCAACGCGATTTGTCCTG 20  
|||||||  
Sbjct: 36 ACGGTTGCGCTAAACAGGAC 17

>miR399f Score: 0.0 R03G\_15285  
Query: 1 TGCCAACGCGATTTGTCCTG 20  
|||||||  
Sbjct: 36 ACGGTTGCGCTAAACAGGAC 17

>miR399f Score: 1.5 R03G\_15161  
Query: 1 TGCCAACGCGATTTGTCCTG 20  
|||||:||||||\*|||  
Sbjct: 36 ACGGTTGTGCTAAACAAGAC 17

>miR399f Score: 2.0 R03G\_15255  
Query: 1 TGCCAACGCGATTTGTCCTG 20  
\*|||||:||\*|||||||  
Sbjct: 36 TCGGTTGTGCCAAACAGGAC 17

>miR399f Score: 2.0 R03G\_14494  
Query: 1 TGCCAACGCGATTTGTCCTG 20  
\*|||||||\*|||\*|  
Sbjct: 36 CCGGTTGCGCTATACAGGCC 17

>miR399f Score: 2.0 R03G\_14628  
Query: 1 TGCCAACGCGATTTGTCCTG 20  
\*|||||||\*|||\*|  
Sbjct: 36 CCGGTTGCGCTATACAGGCC 17

>miR399f Score: 2.0 R03G\_12170  
Query: 1 TGCCAACGCGATTTGTCCTG 20  
\*|||||:||\*|||||||  
Sbjct: 36 TCGGTTGTGCCAAACAGGAC 17

>miR399f Score: 0.0 R03G\_11770  
Query: 1 TGCCAACGCGATTTGTCCTG 20  
|||||||  
Sbjct: 36 ACGGTTGCGCTAAACAGGAC 17

>miR399f Score: 0.0 R03G\_10523  
Query: 1 TGCCAACGCGATTTGTCCTG 20  
|||||||  
Sbjct: 36 ACGGTTGCGCTAAACAGGAC 17

>miR399f Score: 0.0 R03G\_09599

Query: 1 TGCCAACGCGATTTGTCCTG 20  
|||||||  
Sbjct: 36 ACGGTTGCGCTAAACAGGAC 17  
>miR399f Score: 0.0 R03G\_09932  
Query: 1 TGCCAACGCGATTTGTCCTG 20  
|||||||  
Sbjct: 36 ACGGTTGCGCTAAACAGGAC 17  
>miR399f Score: 2.0 R03G\_09935  
Query: 1 TGCCAACGCGATTTGTCCTG 20  
\*|||||||\*|||||\*|  
Sbjct: 36 CCGGTTGCGCTATACAGGCC 17  
>miR399f Score: 1.0 R03G\_09956  
Query: 1 TGCCAACGCGATTTGTCCTG 20  
|||\*|||||||  
Sbjct: 36 ACGATTGCGCTAAACAGGAC 17  
>miR399f Score: 1.5 R03G\_07726  
Query: 1 TGCCAACGCGATTTGTCCTG 20  
|||||||:|||||||\*|||  
Sbjct: 36 ACGGTTGTGCTAAACAAGAC 17  
>miR399f Score: 2.0 R03G\_07843  
Query: 1 TGCCAACGCGATTTGTCCTG 20  
\*|||||||\*|||||\*|  
Sbjct: 36 CCGGTTGCGCTATACAGGCC 17  
>miR399f Score: 1.5 R03G\_05912  
Query: 1 TGCCAACGCGATTTGTCCTG 20  
|||||||:||\*|||||||  
Sbjct: 30 ACGGTTGTGCAAAACAGGAC 11  
>miR399f Score: 2.0 R03G\_06412  
Query: 1 TGCCAACGCGATTTGTCCTG 20  
\*|||||||\*|||||\*|  
Sbjct: 36 CCGGTTGCGCTATACAGGCC 17  
>miR399f Score: 2.5 R03G\_04734  
Query: 1 TGCCAACGCGATTTGTCCTG 20  
\*|\*|||||||:||||||\*  
Sbjct: 516 CCAGTTGCGCTAGACAGGAA 497  
>miR399f Score: 0.0 R03G\_03105  
Query: 1 TGCCAACGCGATTTGTCCTG 20  
|||||||  
Sbjct: 36 ACGGTTGCGCTAAACAGGAC 17  
>miR399f Score: 2.0 R03G\_04214  
Query: 1 TGCCAACGCGATTTGTCCTG 20  
\*|||||||\*|||||\*|  
Sbjct: 36 CCGGTTGCGCTATACAGGCC 17  
>miR399f Score: 0.0 R03G\_04217  
Query: 1 TGCCAACGCGATTTGTCCTG 20



```
|||||
Sbjct: 36 ACGGTTGCGCTAAACAGGAC 17
>miR399f Score: 2.0 R03G_01715
Query: 1 TGCCAACGCGATTTGTCCTG 20
*|||||:|*|||||
Sbjct: 36 TCGGTTGTGCCAAACAGGAC 17
>miR399f Score: 2.0 R03G_01882
Query: 1 TGCCAACGCGATTTGTCCTG 20
*|||||*|||*|
Sbjct: 36 CCGGTTGCGCTATACAGGCC 17
>miR399f Score: 2.0 R03G_01885
Query: 1 TGCCAACGCGATTTGTCCTG 20
*|||||*|||*|
Sbjct: 36 CCGGTTGCGCTATACAGGCC 17
>miR399f Score: 0.0 R03G_01941
Query: 1 TGCCAACGCGATTTGTCCTG 20
|||||
Sbjct: 36 ACGGTTGCGCTAAACAGGAC 17
>miR399f Score: 2.0 R03G_17339
Query: 1 TGCCAACGCGATTTGTCCTG 20
*|||||*|||*|
Sbjct: 36 CCGGTTGCGCTATACAGGCC 17
>miR399f Score: 2.0 R03G_17290
Query: 1 TGCCAACGCGATTTGTCCTG 20
*|||||*|||*|
Sbjct: 36 TCGGTTGCGCTATACAGGCC 17
>miR824-5p Score: 2.5 R03G_05999
Query: 1 TAGACCATTTGTGAGAAG-GG 20
|||||:|:|:|*|
Sbjct: 48 ATCTGGTAAACGTTTTTTGTC 28
>miR824-5p Score: 2.5 R03G_06174
Query: 1 TAGACCATTTGTGAGAAGGG 20
:|:|*|||:|||||:|
Sbjct: 178 GTTTTGTAAGCACTCTTTCC 159
>miR824-5p Score: 2.5 R03G_01069
Query: 1 TAGACCATTTGTGAGAAGGG 20
*|:|||||:|*|
Sbjct: 2009 CTTTGGTAAACACTTTTAGC 1990
>miR824-5p Score: 2.2 R03G_01701
Query: 1 TAGACCATTTGTGAGAAGG-G 20
|||||:|*|||||:|*|
Sbjct: 136 ATCTGGTAAGAACTCTTCTGC 116
>miR5632-3p Score: 2.0 R03G_17202
Query: 1 TTGGATTTAAGTCTGGATACT 21
|*|||||*|*|
```

Sbjct: 814 ATCCTAAATTCAGACCTCTCA 794  
>miR5632-3p Score: 2.0 R03G\_16829  
Query: 1 TTGGATTTAAGTCTGGATACT 21  
|\*||||||||||||||\*|\*|

Sbjct: 814 ATCCTAAATTCAGACCTCTCA 794  
>miR5632-3p Score: 2.0 R03G\_16904  
Query: 1 TTGGATTTAAGTCTGGATACT 21  
|\*||||||||||||||\*|\*|

Sbjct: 814 ATCCTAAATTCAGACCTCTCA 794  
>miR5632-3p Score: 1.0 R03G\_16719  
Query: 1 TTGGATTTAAGTCTGGATACT 21  
||||||||||||||||\*||

Sbjct: 832 AACCTAAATTCAGACCTCCGA 812  
>miR5632-3p Score: 1.0 R03G\_16727  
Query: 1 TTGGATTTAAGTCTGGATACT 21  
||||||||||||||||\*||

Sbjct: 832 AACCTAAATTCAGACCTCCGA 812  
>miR5632-3p Score: 1.2 R03G\_16737  
Query: 1 TTGGATTTAAGTCTGGATACT 21  
||||||||||||||:|||\*||

Sbjct: 460 AACCTAAATTCAGGCCTGAGA 440  
>miR5632-3p Score: 1.5 R03G\_16751  
Query: 1 TTGGATTTAAGTCTGGATACT 21  
||||||||||||||||\*|||

Sbjct: 421 AACCTAAATTCAGACCCTTGA 401  
>miR5632-3p Score: 2.0 R03G\_16428  
Query: 1 TTGGATTTAAGTCTGGATACT 21  
|\*||||||||||||||\*|\*|

Sbjct: 451 ATCCTAAATTCAGACCTCTCA 431  
>miR5632-3p Score: 1.2 R03G\_16541  
Query: 1 TTGGATTTAAGTCTGGATACT 21  
||||||||||||||:|||\*||

Sbjct: 460 AACCTAAATTCAGGCCTGAGA 440  
>miR5632-3p Score: 0.5 R03G\_16140  
Query: 1 TTGGATTTAAGTCTGGATACT 21  
||||||||||||||||\*|||

Sbjct: 271 AACCTAAATTCAGACCTTTGA 251  
>miR5632-3p Score: 1.2 R03G\_16141  
Query: 1 TTGGATTTAAGTCTGGATACT 21  
||||||||||||||:|||\*||

Sbjct: 460 AACCTAAATTCAGGCCTGAGA 440  
>miR5632-3p Score: 2.2 R03G\_16121  
Query: 1 TTGGATTTAAGTCTGGATACT 21  
|\*||||||||||||||:|||\*||

Sbjct: 415 ACCCTAAATTCAGGCCTGAGA 395

>miR5632-3p Score: 1.2 R03G\_16124  
Query: 1 TTGGATTTAAGTCTGGATACT 21  
|||||||:|\*||  
Sbjct: 460 AACCTAAATTCAGGCCTGAGA 440

>miR5632-3p Score: 1.2 R03G\_15286  
Query: 1 TTGGATTTAAGTCTGGATACT 21  
|||||||:|\*||  
Sbjct: 460 AACCTAAATTCAGGCCTGAGA 440

>miR5632-3p Score: 0.5 R03G\_15582  
Query: 1 TTGGATTTAAGTCTGGATACT 21  
|||||||\*|||  
Sbjct: 211 AACCTAAATTCAGACCTCTGA 191

>miR5632-3p Score: 1.2 R03G\_14981  
Query: 1 TTGGATTTAAGTCTGGATACT 21  
|||||||:|\*||  
Sbjct: 460 AACCTAAATTCAGGCCTGAGA 440

>miR5632-3p Score: 1.2 R03G\_15145  
Query: 1 TTGGATTTAAGTCTGGATACT 21  
|||||||:|\*||  
Sbjct: 460 AACCTAAATTCAGGCCTGAGA 440

>miR5632-3p Score: 1.2 R03G\_15170  
Query: 1 TTGGATTTAAGTCTGGATACT 21  
|||||||:|\*||  
Sbjct: 460 AACCTAAATTCAGGCCTGAGA 440

>miR5632-3p Score: 1.2 R03G\_14784  
Query: 1 TTGGATTTAAGTCTGGATACT 21  
|||||||:|\*||  
Sbjct: 460 AACCTAAATTCAGGCCTGAGA 440

>miR5632-3p Score: 0.0 R03G\_13919  
Query: 1 TTGGATTTAAGTCTGGATACT 21  
|||||||  
Sbjct: 1024 AACCTAAATTCAGACCTATGA 1004

>miR5632-3p Score: 0.5 R03G\_13453  
Query: 1 TTGGATTTAAGTCTGGATACT 21  
|||||||\*|||  
Sbjct: 211 AACCTAAATTCAGACCTCTGA 191

>miR5632-3p Score: 2.0 R03G\_13734  
Query: 1 TTGGATTTAAGTCTGGATACT 21  
|\*|||||||\*|\*|  
Sbjct: 814 ATCCTAAATTCAGACCTCTCA 794

>miR5632-3p Score: 1.2 R03G\_13752  
Query: 1 TTGGATTTAAGTCTGGATACT 21  
|||||||:|\*||  
Sbjct: 460 AACCTAAATTCAGGCCTGAGA 440

>miR5632-3p Score: 2.5 R03G\_13855

Query: 1 TTGGATTTAAGTCTGGATACT 21  
||\*\*||||||||||||||||\*|  
Sbjct: 2962 AAAATAAATTCAGACCTATTA 2942  
>miR5632-3p Score: 1.2 R03G\_12950  
Query: 1 TTGGATTTAAGTCTGGATACT 21  
||||||||||||||:||||\*||  
Sbjct: 460 AACCTAAATTCAGGCCTGAGA 440  
>miR5632-3p Score: 1.0 R03G\_13286  
Query: 1 TTGGATTTAAGTCTGGATACT 21  
||||||||||||||||\*\*||  
Sbjct: 1024 AACCTAAATTCAGACCTCCGA 1004  
>miR5632-3p Score: 2.5 R03G\_12067  
Query: 1 TTGGATTTAAGTCTGGATACT 21  
||\*\*||||||||||||||||\*|  
Sbjct: 2962 AAAATAAATTCAGACCTATTA 2942  
>miR5632-3p Score: 0.5 R03G\_12166  
Query: 1 TTGGATTTAAGTCTGGATACT 21  
||||||||||||||||\*|||  
Sbjct: 832 AACCTAAATTCAGACCTTTGA 812  
>miR5632-3p Score: 0.5 R03G\_12659  
Query: 1 TTGGATTTAAGTCTGGATACT 21  
||||||||||||||||\*|||  
Sbjct: 421 AACCTAAATTCAGACCTCTGA 401  
>miR5632-3p Score: 0.5 R03G\_11281  
Query: 1 TTGGATTTAAGTCTGGATACT 21  
||||||||||||||||\*|||  
Sbjct: 787 AACCTAAATTCAGACCTCTGA 767  
>miR5632-3p Score: 2.0 R03G\_11411  
Query: 1 TTGGATTTAAGTCTGGATACT 21  
|\*||||||||||||||||\*|\*|  
Sbjct: 451 ATCCTAAATTCAGACCTCTCA 431  
>miR5632-3p Score: 1.2 R03G\_11533  
Query: 1 TTGGATTTAAGTCTGGATACT 21  
||||||||||||||:||||\*||  
Sbjct: 460 AACCTAAATTCAGGCCTGAGA 440  
>miR5632-3p Score: 1.2 R03G\_11536  
Query: 1 TTGGATTTAAGTCTGGATACT 21  
||||||||||||||:||||\*||  
Sbjct: 460 AACCTAAATTCAGGCCTGAGA 440  
>miR5632-3p Score: 2.2 R03G\_10237  
Query: 1 TTGGATTTAAGTCTGGATACT 21  
|\*||||||||||||||:||||\*||  
Sbjct: 400 ACCCTAAATTCAGGCCTGAGA 380  
>miR5632-3p Score: 0.5 R03G\_10550  
Query: 1 TTGGATTTAAGTCTGGATACT 21

|||||\*|||  
Sbjct: 832 AACCTAAATTCAGACCTTTGA 812  
>miR5632-3p Score: 1.5 R03G\_10768  
Query: 1 TTGGATTTAAGTCTGGATACT 21  
|||\*|||||\*|||  
Sbjct: 37 AACGTAAATTCAGACCTCTGA 17  
>miR5632-3p Score: 2.0 R03G\_10772  
Query: 1 TTGGATTTAAGTCTGGATACT 21  
|||||:||||\*|||\*|||  
Sbjct: 721 AACCTAAGTTCAGTCCTCTGA 701  
>miR5632-3p Score: 0.5 R03G\_10787  
Query: 1 TTGGATTTAAGTCTGGATACT 21  
|||||\*|||  
Sbjct: 832 AACCTAAATTCAGACCTCTGA 812  
>miR5632-3p Score: 1.2 R03G\_10797  
Query: 1 TTGGATTTAAGTCTGGATACT 21  
|||||:|||\*||  
Sbjct: 460 AACCTAAATTCAGGCCTGAGA 440  
>miR5632-3p Score: 1.2 R03G\_09926  
Query: 1 TTGGATTTAAGTCTGGATACT 21  
|||||:|||\*||  
Sbjct: 460 AACCTAAATTCAGGCCTGAGA 440  
>miR5632-3p Score: 1.2 R03G\_10050  
Query: 1 TTGGATTTAAGTCTGGATACT 21  
|||||:|||\*||  
Sbjct: 460 AACCTAAATTCAGGCCTGAGA 440  
>miR5632-3p Score: 0.5 R03G\_10220  
Query: 1 TTGGATTTAAGTCTGGATACT 21  
|||||\*|||  
Sbjct: 271 AACCTAAATTCAGACCTCTGA 251  
>miR5632-3p Score: 2.0 R03G\_08657  
Query: 1 TTGGATTTAAGTCTGGATACT 21  
|||||:||||\*|||\*|||  
Sbjct: 724 AACCTAAGTTCAGTCCTCTGA 704  
>miR5632-3p Score: 0.5 R03G\_08847  
Query: 1 TTGGATTTAAGTCTGGATACT 21  
|||||\*|||  
Sbjct: 832 AACCTAAATTCAGACCTTTGA 812  
>miR5632-3p Score: 1.2 R03G\_07136  
Query: 1 TTGGATTTAAGTCTGGATACT 21  
|||||:|||\*||  
Sbjct: 151 AACCTAAATTCAGGCCTGAGA 131  
>miR5632-3p Score: 2.2 R03G\_07298  
Query: 1 TTGGATTTAAGTCTGGATACT 21  
|\*|||||:|||\*|||

Sbjct: 460 ACCCTAAATTCAGGCCTGAGA 440  
>miR5632-3p Score: 0.0 R03G\_07690  
Query: 1 TTGGATTTAAGTCTGGATACT 21  
|||||

Sbjct: 832 AACCTAAATTCAGACCTATGA 812  
>miR5632-3p Score: 0.0 R03G\_07707  
Query: 1 TTGGATTTAAGTCTGGATACT 21  
|||||

Sbjct: 1024 AACCTAAATTCAGACCTATGA 1004  
>miR5632-3p Score: 1.2 R03G\_07723  
Query: 1 TTGGATTTAAGTCTGGATACT 21  
|||||

Sbjct: 460 AACCTAAATTCAGGCCTGAGA 440  
>miR5632-3p Score: 1.2 R03G\_05522  
Query: 1 TTGGATTTAAGTCTGGATACT 21  
|||||:|\*|

Sbjct: 826 AACCTAAATTCAGGCCTGAGA 806  
>miR5632-3p Score: 2.0 R03G\_05945  
Query: 1 TTGGATTTAAGTCTGGATACT 21  
|\*|||\*|

Sbjct: 451 ATCCTAAATTCAGACCTCTCA 431  
>miR5632-3p Score: 2.5 R03G\_06322  
Query: 1 TTGGATTTAAGTCTGGATACT 21  
|||||\*|||\*|||\*||

Sbjct: 331 AACCTAACTTCAAACCTACGA 311  
>miR5632-3p Score: 2.2 R03G\_04668  
Query: 1 TTGGATTTAAGTCTGGATACT 21  
|\*|||:|\*|

Sbjct: 637 ACCCTAAATTCAGGCCTGAGA 617  
>miR5632-3p Score: 1.2 R03G\_05516  
Query: 1 TTGGATTTAAGTCTGGATACT 21  
|||||:|\*|

Sbjct: 460 AACCTAAATTCAGGCCTGAGA 440  
>miR5632-3p Score: 0.5 R03G\_02846  
Query: 1 TTGGATTTAAGTCTGGATACT 21  
|||||\*|||

Sbjct: 37 AACCTAAATTCAGACCTCTGA 17  
>miR5632-3p Score: 1.2 R03G\_03112  
Query: 1 TTGGATTTAAGTCTGGATACT 21  
|||||:|\*|

Sbjct: 826 AACCTAAATTCAGGCCTGAGA 806  
>miR5632-3p Score: 2.0 R03G\_03554  
Query: 1 TTGGATTTAAGTCTGGATACT 21  
|||||:||||\*||\*|||

Sbjct: 724 AACCTAAGTTCAGTCCTCTGA 704

>miR5632-3p Score: 1.2 R03G\_03560  
Query: 1 TTGGATTTAAGTCTGGATACT 21  
|||||||:|\*||  
Sbjct: 460 AACCTAAATTCAGGCCTGAGA 440

>miR5632-3p Score: 2.5 R03G\_03575  
Query: 1 TTGGATTTAAGTCTGGATACT 21  
||\*\*|||||||\*|  
Sbjct: 2962 AAAATAAATTCAGACCTATTA 2942

>miR5632-3p Score: 1.0 R03G\_03603  
Query: 1 TTGGATTTAAGTCTGGATACT 21  
|||||||:|\*|||  
Sbjct: 271 AACCTAAATTCAGACTTTTGA 251

>miR5632-3p Score: 1.0 R03G\_03624  
Query: 1 TTGGATTTAAGTCTGGATACT 21  
|||||||:|\*|||  
Sbjct: 832 AACCTAAATTCAGACTTCTGA 812

>miR5632-3p Score: 1.2 R03G\_03791  
Query: 1 TTGGATTTAAGTCTGGATACT 21  
|||||||:|\*||  
Sbjct: 460 AACCTAAATTCAGGCCTGAGA 440

>miR5632-3p Score: 2.5 R03G\_03796  
Query: 1 TTGGATTTAAGTCTGGATACT 21  
||\*\*|||||||\*|  
Sbjct: 2155 AAAATAAATTCAGACCTATTA 2135

>miR5632-3p Score: 1.2 R03G\_00240  
Query: 1 TTGGATTTAAGTCTGGATACT 21  
|||||||:|\*||  
Sbjct: 769 AACCTAAATTCAGGCCTGAGA 749

>miR5632-3p Score: 1.0 R03G\_00284  
Query: 1 TTGGATTTAAGTCTGGATACT 21  
|||||||:|\*|||  
Sbjct: 841 AACCTAAATTCAGACCTCCGA 821

>miR5632-3p Score: 2.2 R03G\_00675  
Query: 1 TTGGATTTAAGTCTGGATACT 21  
|\*|||||||:|\*||  
Sbjct: 460 ACCCTAAATTCAGGCCTGAGA 440

>miR5632-3p Score: 0.5 R03G\_00679  
Query: 1 TTGGATTTAAGTCTGGATACT 21  
|||||||:|\*|||  
Sbjct: 1024 AACCTAAATTCAGACCTCTGA 1004

>miR5632-3p Score: 0.5 R03G\_00700  
Query: 1 TTGGATTTAAGTCTGGATACT 21  
|||||||:|\*|||  
Sbjct: 271 AACCTAAATTCAGACCTCTGA 251

>miR5632-3p Score: 1.2 R03G\_01725

Query: 1 TTGGATTTAAGTCTGGATACT 21  
|||||||:|\*||  
Sbjct: 460 AACCTAAATTCAGGCCTGAGA 440  
>miR5632-3p Score: 1.0 R03G\_01959  
Query: 1 TTGGATTTAAGTCTGGATACT 21  
|||||||\*||  
Sbjct: 271 AACCTAAATTCAGACCTCCGA 251  
>miR5632-3p Score: 2.5 R03G\_02224  
Query: 1 TTGGATTTAAGTCTGGATACT 21  
|\*||||||:||||\*|\*|  
Sbjct: 451 ATCCTAAATTCGGACCTCTCA 431  
>miR5632-3p Score: 1.2 R03G\_02227  
Query: 1 TTGGATTTAAGTCTGGATACT 21  
|||||||:|\*||  
Sbjct: 826 AACCTAAATTCAGGCCTGAGA 806  
>miR5632-3p Score: 1.2 R03G\_17423  
Query: 1 TTGGATTTAAGTCTGGATACT 21  
|||||||:|\*||  
Sbjct: 460 AACCTAAATTCAGGCCTGAGA 440  
>miR5632-3p Score: 0.5 R03G\_17408  
Query: 1 TTGGATTTAAGTCTGGATACT 21  
|||||||\*|||  
Sbjct: 832 AACCTAAATTCAGACCTCTGA 812  
>miR5632-3p Score: 1.2 R03G\_17328  
Query: 1 TTGGATTTAAGTCTGGATACT 21  
|||||||:|\*||  
Sbjct: 460 AACCTAAATTCAGGCCTGAGA 440  
>miR5632-3p Score: 1.2 R03G\_17092  
Query: 1 TTGGATTTAAGTCTGGATACT 21  
|||||||:|\*||  
Sbjct: 460 AACCTAAATTCAGGCCTGAGA 440  
>miR5632-3p Score: 2.0 R03G\_17154  
Query: 1 TTGGATTTAAGTCTGGATACT 21  
|\*||||||:||||\*|\*|  
Sbjct: 451 ATCCTAAATTCAGACCTCTCA 431  
>miR8044-5p Score: 0.0 R03G\_17226  
Query: 1 TTGTCAAATGGTTGGAGATTT 22  
|||||||  
Sbjct: 1864 AACAGTTTACCAACCTCTAAA 1843  
>miR8044-5p Score: 0.0 R03G\_16815  
Query: 1 TTGTCAAATGGTTGGAGATTT 22  
|||||||  
Sbjct: 1864 AACAGTTTACCAACCTCTAAA 1843  
>miR8044-5p Score: 0.0 R03G\_14795  
Query: 1 TTGTCAAATGGTTGGAGATTT 22



|||||  
Sbjct: 1864 AACAGTTTTACCAACCTCTAAA 1843  
>miR8044-5p Score: 2.5 R03G\_11557  
Query: 1 TTGTCAAATGGTTGGAGATTT 22  
\*|:|||||:||||\*|  
Sbjct: 383 TATAGTTTTACTAACC-CTAAA 363  
>miR8044-5p Score: 2.2 R03G\_07485  
Query: 1 TTGTCAAATGGTTGGAGATTT 22  
:|||||\*||:|||||\*|  
Sbjct: 977 GACAGTTCTATCAACCTGTAAA 956  
>miR8044-5p Score: 2.2 R03G\_01429  
Query: 1 TTGTCAAATGGTTGGAGATTT 22  
:|||||\*||:|||||\*|  
Sbjct: 1565 GACAGTTCTATCAACCTGTAAA 1544  
>miR475a-3p Score: 0.0 R03G\_16086  
Query: 1 TTAATGCCCATTTGACTTCAG 20  
|||||  
Sbjct: 1844 AATTACGGGTAAGTGAAGTC 1825  
>miR475a-3p Score: 0.0 R03G\_15802  
Query: 1 TTAATGCCCATTTGACTTCAG 20  
|||||  
Sbjct: 3428 AATTACGGGTAAGTGAAGTC 3409  
>miR475a-3p Score: 0.0 R03G\_14949  
Query: 1 TTAATGCCCATTTGACTTCAG 20  
|||||  
Sbjct: 3050 AATTACGGGTAAGTGAAGTC 3031  
>miR475a-3p Score: 0.0 R03G\_12567  
Query: 1 TTAATGCCCATTTGACTTCAG 20  
|||||  
Sbjct: 3428 AATTACGGGTAAGTGAAGTC 3409  
>miR475a-3p Score: 0.0 R03G\_06775  
Query: 1 TTAATGCCCATTTGACTTCAG 20  
|||||  
Sbjct: 3428 AATTACGGGTAAGTGAAGTC 3409  
>miR475a-3p Score: 0.0 R03G\_07854  
Query: 1 TTAATGCCCATTTGACTTCAG 20  
|||||  
Sbjct: 3428 AATTACGGGTAAGTGAAGTC 3409  
>miR475a-3p Score: 0.0 R03G\_04252  
Query: 1 TTAATGCCCATTTGACTTCAG 20  
|||||  
Sbjct: 3428 AATTACGGGTAAGTGAAGTC 3409  
>miR475a-3p Score: 0.0 R03G\_04496  
Query: 1 TTAATGCCCATTTGACTTCAG 20  
|||||

Sbjct: 3050 AATTACGGGTAAGTGAAGTC 3031  
>miR475a-3p Score: 0.0 R03G\_02364  
Query: 1 TTAATGCCCATTTGACTTCAG 20  
|||||

Sbjct: 3428 AATTACGGGTAAGTGAAGTC 3409  
>miR475a-3p Score: 1.5 R03G\_01156  
Query: 1 TTAATGCCCATTTGACTTCAG 20  
|||||:|\*|

Sbjct: 797 AATTATGGTTAACTGAAGTC 778  
>miR475a-3p Score: 2.0 R03G\_16981  
Query: 1 TTAATGCCCATTTGACTTCAG 20  
|||||\*|

Sbjct: 323 AATTACGGTTAACTTAAGTC 304  
>miR475a-3p Score: 2.0 R03G\_16987  
Query: 1 TTAATGCCCATTTGACTTCAG 20  
|||||\*|

Sbjct: 305 AATTACGGTTAACTTAAGTC 286  
>miR6284 Score: 2.5 R03G\_17161  
Query: 1 TATGACCAGGATGAAGCTT 19  
|\*|

Sbjct: 411 AACTGGTTCTATTTTGAA 393  
>miR6284 Score: 2.2 R03G\_12046  
Query: 1 TATGACCAGGATGAAGCTT 19  
\*|

Sbjct: 201 CACTGGCTCTACTTCGGA 183  
>miR6284 Score: 2.5 R03G\_11359  
Query: 1 TATGACCAGGATGAAGCTT 19  
||||\*|

Sbjct: 210 AACTAGTCCTATTACGAA 192  
>miR6284 Score: 2.2 R03G\_10277  
Query: 1 TATGACCAGGATGAAGCTT 19  
:|\*|

Sbjct: 187 GTGCTAGTCCTGCTTCGAA 169  
>miR6284 Score: 2.5 R03G\_09488  
Query: 1 TATGACCAGGATGAAGCTT 19  
|\*|

Sbjct: 2256 AACTGGTTCTATTTTGAA 2238  
>miR6284 Score: 2.2 R03G\_06931  
Query: 1 TATGACCAGGATGAAGCTT 19  
:|\*|

Sbjct: 322 GTATTGGTCCTACTTAGTA 304  
>miR6284 Score: 2.0 R03G\_06036  
Query: 1 TATGACCAGGATGAAGCTT 19  
\*|

Sbjct: 4834 TACTGGTCCTACTTC-AT 4817

>miR6284 Score: 2.5 R03G\_03800  
Query: 1 TATGACCAGGATGAAGCTT 19  
|\*|||||:|:|:|  
Sbjct: 2064 AACTGGTTCTATTTTGAA 2046

>miR6284 Score: 2.5 R03G\_00458  
Query: 1 TATGACCAGGATGAAGCTT 19  
|||||||:|:\*|||\*  
Sbjct: 454 AACTGGTTCTGGTTCGAC 436

>miR1061-3p Score: 1.8 R03G\_13503  
Query: 1 TGTTAGCATGGAATAATG 18  
|:|:|||||:|||||:  
Sbjct: 1257 ATAGTCGACTTTATTAT 1240

>miR1061-3p Score: 2.5 R03G\_11420  
Query: 1 TGTTAGCATGGAATAATG 18  
|||:||\*||\*|||||  
Sbjct: 684 ACAGTCGCACCCTATTAC 667

>miR1061-3p Score: 2.5 R03G\_09891  
Query: 1 TGTTAGCATGGAATAATG 18  
\*|:|:|:|||||:||||  
Sbjct: 345 TCGGTTGTACCTTGTTAC 328

>miR1061-3p Score: 2.2 R03G\_05753  
Query: 1 TGTTAGCATGGAATAATG 18  
|||||:|\*|||||:|:  
Sbjct: 127 ACAATTGTTCCCTTATTGT 110

>miR1061-3p Score: 2.0 R03G\_00027  
Query: 1 TGTTAGCATGGAATAATG 18  
\*|||||||:|:|||||\*  
Sbjct: 190 TCAATCGTGTCTTATTAA 173

>miR1061-3p Score: 2.5 R03G\_00751  
Query: 1 TGTTAGCATGGAATAATG 18  
|:|||||||:|\*|||||  
Sbjct: 1123 ATAATCGTATTATATTAC 1106

>miR1061-3p Score: 2.2 R03G\_01853  
Query: 1 TGTTAGCATGGAATAATG 18  
|||:||\*|||:|||||:  
Sbjct: 364 ACAGTCCTACTTTATTAT 347

>miR5719 Score: 2.5 R03G\_04731  
Query: 1 TTGTGATGATAATCCGACTT 20  
|||||||:|:||||\*||\*||  
Sbjct: 889 AACACTATTGTTAGCCT-AA 871

>miR5719 Score: 2.5 R03G\_05142  
Query: 1 TTGTGATGATAATCCGACTT 20  
||\*|||||||\*|||\*  
Sbjct: 4619 AAAACTACTATTAGTCTGAC 4600

>miR5821 Score: 2.5 R03G\_10279

Query: 1 TGGACGGAGACGATGGTAGAG 21  
|||||:|||||||\*||\*\*|  
Sbjct: 242 ACCTGTCTCTGCTACGATGGC 222  
>miR5821 Score: 2.5 R03G\_10929  
Query: 1 TGGACGGAGACGATGGTAGAG 21  
\*|:|||||||:||\*|||  
Sbjct: 801 TCTTGCCTCTGCTGCC-TCTC 782  
>miR5821 Score: 2.5 R03G\_11069  
Query: 1 TGGACGGAGACGATGGTAGAG 21  
\*|:|||||||:||\*|||  
Sbjct: 801 CCTTGCCTCTGCTGCC-TCTC 782  
>miR5821 Score: 2.5 R03G\_05170  
Query: 1 TGGACGGAGACGATGGTAGAG 21  
\*|:|||||||:||\*|||  
Sbjct: 801 TCTTGCCTCTGCTGCC-TCTC 782  
>miR5821 Score: 2.5 R03G\_01864  
Query: 1 TGGACGGAGACGATGGTAGAG 21  
\*|:|||||||:||\*|||  
Sbjct: 801 CCTTGCCTCTGCTGCC-TCTC 782  
>miR5821 Score: 0.0 R03G\_17015  
Query: 1 TGGACGGAGACGATGGTAGAG 21  
|||||||  
Sbjct: 1042 ACCTGCCTCTGCTACCATCTC 1022  
>miR9409 Score: 2.2 R03G\_16817  
Query: 1 TTTTGCATAGTTCATTTTC 20  
:|||:|\*|||||||\*  
Sbjct: 46 GAAATATTATCAAGTAAAAA 27  
>miR9409 Score: 2.5 R03G\_16521  
Query: 1 TTTTGCATAGTTCATTTTC 20  
\*|||||\*|||||\*||||  
Sbjct: 659 TAAACAGAATCAAGAAAAAG 640  
>miR9409 Score: 2.5 R03G\_16107  
Query: 1 TTTTGCATAGTTCATTTTC 20  
|||||\*|:||||\*|||||  
Sbjct: 1991 AAAACATTGTCAACTAAAAG 1972  
>miR9409 Score: 0.0 R03G\_15711  
Query: 1 TTTTGCATAGTTCATTTTC 20  
|||||||  
Sbjct: 1642 AAAACAGTATCAAGTAAAAG 1623  
>miR9409 Score: 2.0 R03G\_14532  
Query: 1 TTTTGCATAGTTCATTTTC 20  
|:|:|||||:|||||||\*  
Sbjct: 1633 AGAATAGTATTAAGTAAAAC 1614  
>miR9409 Score: 2.5 R03G\_14210  
Query: 1 TTTTGCATAGTTCATTTTC 20

|:|::||||:||||||\*  
Sbjct: 1027 AGAGTAGTATTAAGTAAAAC 1008  
>miR9409 Score: 2.5 R03G\_13589  
Query: 1 TTTTGCATAGTTCATTTTC 20  
|:|||||\*|:||||||\*  
Sbjct: 556 AGAACAGTTTTAAGTAAAAC 537  
>miR9409 Score: 2.5 R03G\_13624  
Query: 1 TTTTGCATAGTTCATTTTC 20  
|:|||||\*|:||||||\*  
Sbjct: 343 AGAACAGTTTTAAGTAAAAC 324  
>miR9409 Score: 2.2 R03G\_13728  
Query: 1 TTTTGCATAGTTCATTTTC 20  
:||||:|||||||:\*\*|  
Sbjct: 836 GAAACGGTATCAAGTAGTTG 817  
>miR9409 Score: 0.0 R03G\_13796  
Query: 1 TTTTGCATAGTTCATTTTC 20  
|||||||  
Sbjct: 1642 AAAACAGTATCAAGTAAAAG 1623  
>miR9409 Score: 2.0 R03G\_13807  
Query: 1 TTTTGCATAGTTCATTTTC 20  
|:|:||||:||||||\*  
Sbjct: 895 AGAATAGTATTAAGTAAAAC 876  
>miR9409 Score: 0.0 R03G\_11521  
Query: 1 TTTTGCATAGTTCATTTTC 20  
|||||||  
Sbjct: 604 AAAACAGTATCAAGTAAAAG 585  
>miR9409 Score: 0.0 R03G\_09539  
Query: 1 TTTTGCATAGTTCATTTTC 20  
|||||||  
Sbjct: 1642 AAAACAGTATCAAGTAAAAG 1623  
>miR9409 Score: 2.2 R03G\_07873  
Query: 1 TTTTGCATAGTTCATTTTC 20  
:||||:|||||||:\*\*|  
Sbjct: 848 GAAACGGTATCAAGTAGTTG 829  
>miR9409 Score: 2.2 R03G\_05922  
Query: 1 TTTTGCATAGTTCATTTTC 20  
:||||:|||||||:\*\*|  
Sbjct: 347 GAAACGGTATCAAGTAGTTG 328  
>miR9409 Score: 2.5 R03G\_06371  
Query: 1 TTTTGCATAGTTCATTTTC 20  
|||||||\*|\*|  
Sbjct: 589 AAAACAGTATCAAGCGA-TG 571  
>miR9409 Score: 2.2 R03G\_04478  
Query: 1 TTTTGCATAGTTCATTTTC 20  
|:||||||\*||||:|\*



>miR5059 Score: 2.5 R03G\_00398  
Query: 1 CGATCCTGGGCAGCACCACC 20  
|\*|||\*|||||||\*|  
Sbjct: 1583 GATAGTACCCGTCGTGGTTCG 1564

>miR1093 Score: 2.5 R03G\_11957  
Query: 1 TGGATGTTCTTGCCAACGA 19  
|||||||\*|||\*  
Sbjct: 46 ACCTACAAGAACGTCTGCA 28

>miR1093 Score: 2.5 R03G\_12393  
Query: 1 TGGATGTTCTTGCCAACGA 19  
|\*|:|||||||\*|  
Sbjct: 269 AGTTGCAAGAACGGTTG-T 252

>miR1093 Score: 1.5 R03G\_11878  
Query: 1 TGGATGTTCTTGCCAACGA 19  
:||||\*|||||||:|  
Sbjct: 158 GCCTAGAAGAACGGTTGTT 140

>miR1093 Score: 2.5 R03G\_10877  
Query: 1 TGGATGTTCTTGCCAACGA 19  
|||||||\*|||\*  
Sbjct: 46 ACCTACAAGAACGTCTGCA 28

>miR1093 Score: 1.5 R03G\_08578  
Query: 1 TGGATGTTCTTGCCAACGA 19  
:||||\*|||||||:|  
Sbjct: 158 GCCTAGAAGAACGGTTGTT 140

>miR1093 Score: 2.5 R03G\_06872  
Query: 1 TGGATGTTCTTGCCAACGA 19  
\*|||||||\*|\*|||  
Sbjct: 675 TCCTACAAGAACAGGTGCT 657

>miR1093 Score: 2.5 R03G\_00353  
Query: 1 TGGATGTTCTTGCCAACGA 19  
||:||||\*|\*|||\*|  
Sbjct: 1577 ACTTACAACGACGGTTG-T 1560

>miR415 Score: 0.0 R03G\_17256  
Query: 1 AAAGGAACAGAAGCAGAAGCAG 22  
|||||||  
Sbjct: 182 TTCCTTGTCTTCGTCTTCGTC 161

>miR415 Score: 1.0 R03G\_17244  
Query: 1 AAAGGAACAGAAGCAGAAGCAG 22  
|\*|||||||  
Sbjct: 212 TGCCTTGTCTTCGTCTTCGTC 191

>miR415 Score: 2.5 R03G\_17245  
Query: 1 AAAGGAACAGAAGCAGAAGCAG 22  
\*||\*|||||||\*|\*||  
Sbjct: 35 CTTACTTGTCTTCGTCTAC-TC 15

>miR415 Score: 0.0 R03G\_17248

Query: 1 AAAGGAACAGAAGCAGAAGCAG 22  
|||||  
Sbjct: 188 TTTCCTTGTCTTCGTCTTCGTC 167  
>miR415 Score: 1.0 R03G\_17210

Query: 1 AAAGGAACAGAAGCAGAAGCAG 22  
|\*|||||  
Sbjct: 239 TGCCTTGTCTTCGTCTTCGTC 218  
>miR415 Score: 1.0 R03G\_16901

Query: 1 AAAGGAACAGAAGCAGAAGCAG 22  
|\*|||||  
Sbjct: 209 TGCCTTGTCTTCGTCTTCGTC 188  
>miR415 Score: 2.5 R03G\_16910

Query: 1 AAAGGAACAGAAGCAGAAGCAG 22  
\*||\*|||||\*||  
Sbjct: 35 CTTACTTGTCTTCGTCTAC-TC 15  
>miR415 Score: 1.0 R03G\_16917

Query: 1 AAAGGAACAGAAGCAGAAGCAG 22  
|\*|||||  
Sbjct: 215 TGCCTTGTCTTCGTCTTCGTC 194  
>miR415 Score: 1.0 R03G\_16743

Query: 1 AAAGGAACAGAAGCAGAAGCAG 22  
|\*|||||  
Sbjct: 161 TGCCTTGTCTTCGTCTTCGTC 140  
>miR415 Score: 0.0 R03G\_16748

Query: 1 AAAGGAACAGAAGCAGAAGCAG 22  
|||||  
Sbjct: 158 TTTCCTTGTCTTCGTCTTCGTC 137  
>miR415 Score: 1.0 R03G\_16369

Query: 1 AAAGGAACAGAAGCAGAAGCAG 22  
|\*|||||  
Sbjct: 194 TGCCTTGTCTTCGTCTTCGTC 173  
>miR415 Score: 0.0 R03G\_16137

Query: 1 AAAGGAACAGAAGCAGAAGCAG 22  
|||||  
Sbjct: 182 TTTCCTTGTCTTCGTCTTCGTC 161  
>miR415 Score: 1.0 R03G\_15879

Query: 1 AAAGGAACAGAAGCAGAAGCAG 22  
|\*|||||  
Sbjct: 215 TGCCTTGTCTTCGTCTTCGTC 194  
>miR415 Score: 1.0 R03G\_15887

Query: 1 AAAGGAACAGAAGCAGAAGCAG 22  
|\*|||||  
Sbjct: 239 TGCCTTGTCTTCGTCTTCGTC 218  
>miR415 Score: 0.0 R03G\_15890

Query: 1 AAAGGAACAGAAGCAGAAGCAG 22



|||||  
Sbjct: 182 TTTCCTTGTCTTCGTCTTCGTC 161  
>miR415 Score: 0.0 R03G\_15897  
Query: 1 AAAGGAACAGAAGCAGAAGCAG 22  
|||||  
Sbjct: 158 TTTCCTTGTCTTCGTCTTCGTC 137  
>miR415 Score: 2.5 R03G\_15509  
Query: 1 AAAGGAACAGAAGCAGAAGCAG 22  
|||\*||\*|:|||||  
Sbjct: 26 TTTCATTATTTTCGTCTTCGTC 5  
>miR415 Score: 0.0 R03G\_15147  
Query: 1 AAAGGAACAGAAGCAGAAGCAG 22  
|||||  
Sbjct: 134 TTTCCTTGTCTTCGTCTTCGTC 113  
>miR415 Score: 0.0 R03G\_14551  
Query: 1 AAAGGAACAGAAGCAGAAGCAG 22  
|||||  
Sbjct: 158 TTTCCTTGTCTTCGTCTTCGTC 137  
>miR415 Score: 1.0 R03G\_14553  
Query: 1 AAAGGAACAGAAGCAGAAGCAG 22  
|\*|||||  
Sbjct: 215 TGCCTTGTCTTCGTCTTCGTC 194  
>miR415 Score: 2.5 R03G\_14707  
Query: 1 AAAGGAACAGAAGCAGAAGCAG 22  
\*||\*|||||\*||  
Sbjct: 35 CTTACTTGTCTTCGTCTAC-TC 15  
>miR415 Score: 1.0 R03G\_13452  
Query: 1 AAAGGAACAGAAGCAGAAGCAG 22  
|\*|||||  
Sbjct: 191 TGCCTTGTCTTCGTCTTCGTC 170  
>miR415 Score: 2.5 R03G\_13710  
Query: 1 AAAGGAACAGAAGCAGAAGCAG 22  
\*||\*|||||\*||  
Sbjct: 35 CTTACTTGTCTTCGTCTAC-TC 15  
>miR415 Score: 2.5 R03G\_13738  
Query: 1 AAAGGAACAGAAGCAGAAGCAG 22  
\*||\*|||||\*||  
Sbjct: 35 CTTACTTGTCTTCGTCTAC-TC 15  
>miR415 Score: 1.0 R03G\_12976  
Query: 1 AAAGGAACAGAAGCAGAAGCAG 22  
|\*|||||  
Sbjct: 218 TGCCTTGTCTTCGTCTTCGTC 197  
>miR415 Score: 0.0 R03G\_13146  
Query: 1 AAAGGAACAGAAGCAGAAGCAG 22  
|||||

Sbjct: 182 TTTCCTTGTCTTCGTCTTCGTC 161  
>miR415 Score: 0.0 R03G\_13272  
Query: 1 AAAGGAACAGAAGCAGAAGCAG 22  
|||||  
Sbjct: 241 TTTCCTTGTCTTCGTCTTCGTC 220  
>miR415 Score: 2.5 R03G\_12006  
Query: 1 AAAGGAACAGAAGCAGAAGCAG 22  
\*||\*|||||\*||  
Sbjct: 35 CTTACTTGTCTTCGTCTAC-TC 15  
>miR415 Score: 1.0 R03G\_12011  
Query: 1 AAAGGAACAGAAGCAGAAGCAG 22  
|\*|||||  
Sbjct: 215 TGCCTTGTCTTCGTCTTCGTC 194  
>miR415 Score: 0.0 R03G\_11236  
Query: 1 AAAGGAACAGAAGCAGAAGCAG 22  
|||||  
Sbjct: 200 TTTCCTTGTCTTCGTCTTCGTC 179  
>miR415 Score: 0.0 R03G\_11537  
Query: 1 AAAGGAACAGAAGCAGAAGCAG 22  
|||||  
Sbjct: 200 TTTCCTTGTCTTCGTCTTCGTC 179  
>miR415 Score: 1.0 R03G\_11543  
Query: 1 AAAGGAACAGAAGCAGAAGCAG 22  
|\*|||||  
Sbjct: 215 TGCCTTGTCTTCGTCTTCGTC 194  
>miR415 Score: 0.0 R03G\_10775  
Query: 1 AAAGGAACAGAAGCAGAAGCAG 22  
|||||  
Sbjct: 188 TTTCCTTGTCTTCGTCTTCGTC 167  
>miR415 Score: 0.0 R03G\_09602  
Query: 1 AAAGGAACAGAAGCAGAAGCAG 22  
|||||  
Sbjct: 158 TTTCCTTGTCTTCGTCTTCGTC 137  
>miR415 Score: 0.0 R03G\_09603  
Query: 1 AAAGGAACAGAAGCAGAAGCAG 22  
|||||  
Sbjct: 200 TTTCCTTGTCTTCGTCTTCGTC 179  
>miR415 Score: 0.0 R03G\_09929  
Query: 1 AAAGGAACAGAAGCAGAAGCAG 22  
|||||  
Sbjct: 158 TTTCCTTGTCTTCGTCTTCGTC 137  
>miR415 Score: 0.0 R03G\_10041  
Query: 1 AAAGGAACAGAAGCAGAAGCAG 22  
|||||  
Sbjct: 188 TTTCCTTGTCTTCGTCTTCGTC 167

>miR415 Score: 1.0 R03G\_10043  
Query: 1 AAAGGAACAGAAGCAGAAGCAG 22  
|\*||||||||||||||||||  
Sbjct: 209 TGCCTTGTCTTCGTCTTCGTC 188

>miR415 Score: 2.5 R03G\_10043  
Query: 1 AAAGGAACAGAAGCAGAAGCAG 22  
|\*||||\*||||||||||||||\*|  
Sbjct: 161 TGCCTCGTCTTCGTCTTCGCC 140

>miR415 Score: 2.5 R03G\_10076  
Query: 1 AAAGGAACAGAAGCAGAAGCAG 22  
\*|\*|:||||||||||||||\*||  
Sbjct: 512 CTGCTTTGTCTTCGTCTTCTTC 491

>miR415 Score: 0.0 R03G\_10218  
Query: 1 AAAGGAACAGAAGCAGAAGCAG 22  
||||||||||||||||||  
Sbjct: 188 TTCCTTGTCTTCGTCTTCGTC 167

>miR415 Score: 0.0 R03G\_07981  
Query: 1 AAAGGAACAGAAGCAGAAGCAG 22  
||||||||||||||||||  
Sbjct: 158 TTCCTTGTCTTCGTCTTCGTC 137

>miR415 Score: 0.0 R03G\_09182  
Query: 1 AAAGGAACAGAAGCAGAAGCAG 22  
||||||||||||||||||  
Sbjct: 182 TTCCTTGTCTTCGTCTTCGTC 161

>miR415 Score: 0.0 R03G\_06730  
Query: 1 AAAGGAACAGAAGCAGAAGCAG 22  
||||||||||||||||||  
Sbjct: 158 TTCCTTGTCTTCGTCTTCGTC 137

>miR415 Score: 0.0 R03G\_07306  
Query: 1 AAAGGAACAGAAGCAGAAGCAG 22  
||||||||||||||||||  
Sbjct: 158 TTCCTTGTCTTCGTCTTCGTC 137

>miR415 Score: 1.0 R03G\_07692  
Query: 1 AAAGGAACAGAAGCAGAAGCAG 22  
|\*||||||||||||||||||  
Sbjct: 149 TGCCTTGTCTTCGTCTTCGTC 128

>miR415 Score: 0.0 R03G\_07696  
Query: 1 AAAGGAACAGAAGCAGAAGCAG 22  
||||||||||||||||||  
Sbjct: 158 TTCCTTGTCTTCGTCTTCGTC 137

>miR415 Score: 0.0 R03G\_07720  
Query: 1 AAAGGAACAGAAGCAGAAGCAG 22  
||||||||||||||||||  
Sbjct: 158 TTCCTTGTCTTCGTCTTCGTC 137

>miR415 Score: 0.0 R03G\_07738

Query: 1 AAAGGAACAGAAGCAGAAGCAG 22  
|||||  
Sbjct: 200 TTTCCTTGTCTTCGTCTTCGTC 179  
>miR415 Score: 1.0 R03G\_04659  
Query: 1 AAAGGAACAGAAGCAGAAGCAG 22  
|\*|||||  
Sbjct: 149 TGCCTTGTCTTCGTCTTCGTC 128  
>miR415 Score: 2.5 R03G\_04776  
Query: 1 AAAGGAACAGAAGCAGAAGCAG 22  
|||||\*\*|||||\*||  
Sbjct: 1427 TTTCCTTCTTCGTCTTCCTC 1406  
>miR415 Score: 1.0 R03G\_05347  
Query: 1 AAAGGAACAGAAGCAGAAGCAG 22  
|\*|||||  
Sbjct: 215 TGCCTTGTCTTCGTCTTCGTC 194  
>miR415 Score: 0.0 R03G\_05425  
Query: 1 AAAGGAACAGAAGCAGAAGCAG 22  
|||||  
Sbjct: 188 TTTCCTTGTCTTCGTCTTCGTC 167  
>miR415 Score: 0.0 R03G\_02228  
Query: 1 AAAGGAACAGAAGCAGAAGCAG 22  
|||||  
Sbjct: 158 TTTCCTTGTCTTCGTCTTCGTC 137  
>miR415 Score: 1.0 R03G\_02817  
Query: 1 AAAGGAACAGAAGCAGAAGCAG 22  
|\*|||||  
Sbjct: 218 TGCCTTGTCTTCGTCTTCGTC 197  
>miR415 Score: 0.0 R03G\_03584  
Query: 1 AAAGGAACAGAAGCAGAAGCAG 22  
|||||  
Sbjct: 116 TTTCCTTGTCTTCGTCTTCGTC 95  
>miR415 Score: 0.0 R03G\_04211  
Query: 1 AAAGGAACAGAAGCAGAAGCAG 22  
|||||  
Sbjct: 158 TTTCCTTGTCTTCGTCTTCGTC 137  
>miR415 Score: 1.0 R03G\_00288  
Query: 1 AAAGGAACAGAAGCAGAAGCAG 22  
|\*|||||  
Sbjct: 182 TGCCTTGTCTTCGTCTTCGTC 161  
>miR415 Score: 2.2 R03G\_00874  
Query: 1 AAAGGAACAGAAGCAGAAGCAG 22  
|||||\*|||||\*:\*||  
Sbjct: 1889 TTTCCTAGTCTTCGTCTAT-TC 1869  
>miR415 Score: 1.0 R03G\_01192  
Query: 1 AAAGGAACAGAAGCAGAAGCAG 22



Sbjct: 250 AGCAAGCCCGGTATCTATGT 231  
>miR5650 Score: 1.0 R03G\_04428  
Query: 1 TCGTTTTGGCCTTAGATACA 20  
|||||:|||||||\*||  
Sbjct: 196 AGCAAGACCGGAATCTACGT 177  
>miR5650 Score: 2.5 R03G\_01148  
Query: 1 TCGTTTTGGCCTTAGATACA 20  
|\*|||:||||\*|||||||  
Sbjct: 196 AACAAGACCGTAATCTATGT 177  
>miR5650 Score: 2.5 R03G\_01162  
Query: 1 TCGTTTTGGCCTTAGATACA 20  
|\*|||:||||\*|||||||  
Sbjct: 196 AACAAGACCGTAATCTATGT 177  
>miR5185l-3p Score: 1.5 R03G\_17211  
Query: 1 TTGGACGGTTGACTTAGAAC 20  
|||||||:||||||\*|||  
Sbjct: 759 AACCTGCCGACTGAACCTTG 740  
>miR5185l-3p Score: 1.5 R03G\_17213  
Query: 1 TTGGACGGTTGACTTAGAAC 20  
|||||||:||||||\*|||  
Sbjct: 84 AACCTGCCGACTGAACCTTG 65  
>miR5185l-3p Score: 2.5 R03G\_16377  
Query: 1 TTGGACGGTTGACTTAGAAC 20  
|||:|\*|||||||\*|||  
Sbjct: 84 AACTTGACAACCTGAACCTTG 65  
>miR5185l-3p Score: 1.0 R03G\_16118  
Query: 1 TTGGACGGTTGACTTAGAAC 20  
|||||||:||||||\*|||  
Sbjct: 27 AACCTGCCAACTGAACCTTG 8  
>miR5185l-3p Score: 1.0 R03G\_15873  
Query: 1 TTGGACGGTTGACTTAGAAC 20  
|||||||:||||||\*|||  
Sbjct: 759 AACCTGCCAACTGAACCTTG 740  
>miR5185l-3p Score: 1.5 R03G\_15154  
Query: 1 TTGGACGGTTGACTTAGAAC 20  
|||||||:||||||\*|||  
Sbjct: 759 AACCTGCCGACTGAACCTTG 740  
>miR5185l-3p Score: 1.5 R03G\_13447  
Query: 1 TTGGACGGTTGACTTAGAAC 20  
||||||:|||||||\*|||  
Sbjct: 759 AACCTGTCAACTGAACCTTG 740  
>miR5185l-3p Score: 1.5 R03G\_13706  
Query: 1 TTGGACGGTTGACTTAGAAC 20  
|||||||:||||||\*|||  
Sbjct: 717 AACCTGCCGACTGAACCTTG 698

>miR5185l-3p Score: 1.0 R03G\_12013  
Query: 1 TTGGACGGTTGACTTAGAAC 20  
|||||\*||||  
Sbjct: 84 AACCTGCCAACTGAACCTTG 65

>miR5185l-3p Score: 1.5 R03G\_12174  
Query: 1 TTGGACGGTTGACTTAGAAC 20  
|||||:|||||\*||||  
Sbjct: 84 AACCTGCCGACTGAACCTTG 65

>miR5185l-3p Score: 1.5 R03G\_12526  
Query: 1 TTGGACGGTTGACTTAGAAC 20  
|||||:|||||\*||||  
Sbjct: 759 AACCTGCCGACTGAACCTTG 740

>miR5185l-3p Score: 1.0 R03G\_11244  
Query: 1 TTGGACGGTTGACTTAGAAC 20  
|||||\*||||  
Sbjct: 759 AACCTGCCAACTGAACCTTG 740

>miR5185l-3p Score: 1.5 R03G\_11263  
Query: 1 TTGGACGGTTGACTTAGAAC 20  
|||||:|||||\*||||  
Sbjct: 84 AACCTGCCGACTGAACCTTG 65

>miR5185l-3p Score: 1.0 R03G\_11528  
Query: 1 TTGGACGGTTGACTTAGAAC 20  
|||||\*||||  
Sbjct: 84 AACCTGCCAACTGAACCTTG 65

>miR5185l-3p Score: 1.0 R03G\_11534  
Query: 1 TTGGACGGTTGACTTAGAAC 20  
|||||\*||||  
Sbjct: 759 AACCTGCCAACTGAACCTTG 740

>miR5185l-3p Score: 0.0 R03G\_11948  
Query: 1 TTGGACGGTTGACTTAGAAC 20  
|||||  
Sbjct: 759 AACCTGCCAACTGAATCTTG 740

>miR5185l-3p Score: 1.0 R03G\_10528  
Query: 1 TTGGACGGTTGACTTAGAAC 20  
|||||\*||||  
Sbjct: 84 AACCTGCCAACTGAACCTTG 65

>miR5185l-3p Score: 1.0 R03G\_10537  
Query: 1 TTGGACGGTTGACTTAGAAC 20  
|||||\*||||  
Sbjct: 582 AACCTGCCAACTGAACCTTG 563

>miR5185l-3p Score: 1.0 R03G\_10720  
Query: 1 TTGGACGGTTGACTTAGAAC 20  
|||||\*||||  
Sbjct: 759 AACCTGCCAACTGAACCTTG 740

>miR5185l-3p Score: 1.0 R03G\_10742

Query: 1 TTGGACGGTTGACTTAGAAC 20  
|||||||\*||||  
Sbjct: 84 AACCTGCCAACTGAACCTTG 65  
>miR5185l-3p Score: 0.0 R03G\_09199  
Query: 1 TTGGACGGTTGACTTAGAAC 20  
|||||||\*||||  
Sbjct: 759 AACCTGCCAACTGAATCTTG 740  
>miR5185l-3p Score: 0.0 R03G\_09924  
Query: 1 TTGGACGGTTGACTTAGAAC 20  
|||||||\*||||  
Sbjct: 759 AACCTGCCAACTGAATCTTG 740  
>miR5185l-3p Score: 1.0 R03G\_10044  
Query: 1 TTGGACGGTTGACTTAGAAC 20  
|||||||\*||||  
Sbjct: 759 AACCTGCCAACTGAACCTTG 740  
>miR5185l-3p Score: 1.0 R03G\_07994  
Query: 1 TTGGACGGTTGACTTAGAAC 20  
|||||||\*||||  
Sbjct: 759 AACCTGCCAACTGAACCTTG 740  
>miR5185l-3p Score: 2.0 R03G\_08835  
Query: 1 TTGGACGGTTGACTTAGAAC 20  
||||\*||||||\*||||  
Sbjct: 69 AACCTACCAACTGAACCTTG 50  
>miR5185l-3p Score: 1.0 R03G\_08848  
Query: 1 TTGGACGGTTGACTTAGAAC 20  
|||||||\*||||  
Sbjct: 69 AACCTGCCAACTGAACCTTG 50  
>miR5185l-3p Score: 1.0 R03G\_07119  
Query: 1 TTGGACGGTTGACTTAGAAC 20  
|||||||\*||||  
Sbjct: 84 AACCTGCCAACTGAACCTTG 65  
>miR5185l-3p Score: 0.0 R03G\_07295  
Query: 1 TTGGACGGTTGACTTAGAAC 20  
|||||||\*||||  
Sbjct: 591 AACCTGCCAACTGAATCTTG 572  
>miR5185l-3p Score: 2.5 R03G\_07465  
Query: 1 TTGGACGGTTGACTTAGAA-C 20  
||||\*||||||\*||||\*|  
Sbjct: 1474 AACCTACCAACTGTATCTTAG 1454  
>miR5185l-3p Score: 1.0 R03G\_07683  
Query: 1 TTGGACGGTTGACTTAGAAC 20  
|||||||\*||||  
Sbjct: 759 AACCTGCCAACTGAACCTTG 740  
>miR5185l-3p Score: 1.0 R03G\_05916  
Query: 1 TTGGACGGTTGACTTAGAAC 20



|||||\*||||  
Sbjct: 759 AACCTGCCAACTGAACCTTG 740  
>miR5185l-3p Score: 1.5 R03G\_03558  
Query: 1 TTGGACGGTTGACTTAGAAC 20  
|||||:|||||\*||||  
Sbjct: 759 AACCTGTCAACTGAACCTTG 740  
>miR5185l-3p Score: 1.5 R03G\_03617  
Query: 1 TTGGACGGTTGACTTAGAAC 20  
|||||:|||||\*||||  
Sbjct: 759 AACCTGTCAACTGAACCTTG 740  
>miR5185l-3p Score: 1.0 R03G\_03987  
Query: 1 TTGGACGGTTGACTTAGAAC 20  
|||||\*||||  
Sbjct: 759 AACCTGCCAACTGAACCTTG 740  
>miR5185l-3p Score: 1.0 R03G\_01194  
Query: 1 TTGGACGGTTGACTTAGAAC 20  
|||||\*||||  
Sbjct: 759 AACCTGCCAACTGAACCTTG 740  
>miR5185l-3p Score: 1.0 R03G\_01313  
Query: 1 TTGGACGGTTGACTTAGAAC 20  
|||||\*||||  
Sbjct: 759 AACCTGCCAACTGAACCTTG 740  
>miR5185l-3p Score: 1.0 R03G\_01735  
Query: 1 TTGGACGGTTGACTTAGAAC 20  
|||||\*||||  
Sbjct: 759 AACCTGCCAACTGAACCTTG 740  
>miR5185l-3p Score: 0.0 R03G\_01950  
Query: 1 TTGGACGGTTGACTTAGAAC 20  
|||||\*||||  
Sbjct: 759 AACCTGCCAACTGAATCTTG 740  
>miR5185l-3p Score: 1.0 R03G\_01951  
Query: 1 TTGGACGGTTGACTTAGAAC 20  
|||||\*||||  
Sbjct: 759 AACCTGCCAACTGAACCTTG 740  
>miR5185l-3p Score: 1.5 R03G\_17409  
Query: 1 TTGGACGGTTGACTTAGAAC 20  
|||||:|||||\*||||  
Sbjct: 759 AACCTGCCGACTGAACCTTG 740  
>miR1147.2 Score: 2.5 R03G\_13308  
Query: 1 GCTCGGCAAGTCTGGAAAGA 20  
||||:|||||:|\*|\*|  
Sbjct: 1120 CGAGTCGTTTCAGACTTCT-T 1102  
>miR1147.2 Score: 2.5 R03G\_10416  
Query: 1 GCTCGGCAAGTCTGGAAAGA 20  
||||:|||||:|\*|\*|

Sbjct: 262 CGAGTCGTTTCAGACTTCT-T 244  
>miR1147.2 Score: 2.5 R03G\_09223  
Query: 1 GCTCGGCAAGTCTGGAAAGA 20  
||||:|||||||:|\*|\*|

Sbjct: 262 CGAGTCGTTTCAGACTTCT-T 244  
>miR1147.2 Score: 2.5 R03G\_08103  
Query: 1 GCTCGGCAAGTCTGGAAAGA 20  
||||:|||||||:|\*|\*|

Sbjct: 936 CGAGTCGTTTCAGACTTCT-T 918  
>miR1147.2 Score: 2.5 R03G\_08369  
Query: 1 GCTCGGCAAGTCTGGAAAGA 20  
||||:|||||||:|\*|\*|

Sbjct: 1288 CGAGTCGTTTCAGACTTCT-T 1270  
>miR1147.2 Score: 2.5 R03G\_06788  
Query: 1 GCTCGGCAAGTCTGGAAAGA 20  
||||:|||||||:|\*|\*|

Sbjct: 262 CGAGTCGTTTCAGACTTCT-T 244  
>miR1147.2 Score: 2.5 R03G\_07829  
Query: 1 GCTCGGCAAGTCTGGAAAGA 20  
||||:|||||||:|\*|\*|

Sbjct: 262 CGAGTCGTTTCAGACTTCT-T 244  
>miR1147.2 Score: 2.2 R03G\_04700  
Query: 1 GCTCGGCAAGTCTGGAAAGA 20  
||||:|||||||:|\*|:|

Sbjct: 49 CGAGTCGTTTCAGACTTCTTT 30  
>miR1147.2 Score: 2.0 R03G\_00224  
Query: 1 GCTCGGCAAGTCTGGAAAGA 20  
\*|||:|||||||\*|||

Sbjct: 76 GGAGTCGTTTCAGACCTATCT 57  
>miR6274b-3p Score: 0.0 R03G\_15390  
Query: 1 TTGTGGTAGACCGAAAATAG 20  
|||||||

Sbjct: 543 AACACCATCTGGCTTTTATC 524  
>miR6274b-3p Score: 0.0 R03G\_13001  
Query: 1 TTGTGGTAGACCGAAAATAG 20  
|||||||

Sbjct: 2253 AACACCATCTGGCTTTTATC 2234  
>miR6274b-3p Score: 1.0 R03G\_10503  
Query: 1 TTGTGGTAGACCGAAAATAG 20  
|||||||\*|||

Sbjct: 189 AACACCATCTGGCCTTTATC 170  
>miR6274b-3p Score: 0.0 R03G\_06596  
Query: 1 TTGTGGTAGACCGAAAATAG 20  
|||||||

Sbjct: 2253 AACACCATCTGGCTTTTATC 2234

>miR6274b-3p Score: 0.0 R03G\_03002  
Query: 1 TTGTGGTAGACCGAAAATAG 20  
|||||  
Sbjct: 2253 AACACCATCTGGCTTTTATC 2234

>miR6274b-3p Score: 2.5 R03G\_02145  
Query: 1 TTGTGGTAGACCGAAAATAG 20  
|||||\*||\*||||\*  
Sbjct: 135 AACACCATCTAGCCTTTATG 116

>miR8126-3p Score: 2.5 R03G\_16842  
Query: 1 TTCAGTATATTTGTCATCAGAG 22  
||||\*||||:||||:|  
Sbjct: 258 AAGTCTTATAAGTAGTAGTTTT 237

>miR8126-3p Score: 2.0 R03G\_10563  
Query: 1 TTCAGTATATTTGTCATCAGAG 22  
|||||\*|:|||||\*  
Sbjct: 24 AAGTCATATTAGCAGTAGTCTG 3

>miR8126-3p Score: 2.5 R03G\_10119  
Query: 1 TTCAGTATATTTGTCATCAGAG 22  
||||:|\*|:|:|||||  
Sbjct: 84 AAGTCGTACAGATAGTAGTCTC 63

>miR8126-3p Score: 2.5 R03G\_06496  
Query: 1 TTCAGTATATTTGTCATCAGAG 22  
|||||:|\*||\*||\*|  
Sbjct: 1602 AAGTCATATGAAAAGTAGT-AC 1582

>miR2111-3p Score: 2.5 R03G\_06346  
Query: 1 GAAGTCAGGTGGGATTACC 19  
||\*|||:||\*|||  
Sbjct: 276 CTTGAGTCTACCCAAATGG 258

>miR1428b Score: 0.2 R03G\_13882  
Query: 1 TATAAGAAATGCCATGAATTCT 22  
|||||:|||  
Sbjct: 654 ATATTCTTTACGGTACTTGAGA 633

>miR1428b Score: 0.2 R03G\_13730  
Query: 1 TATAAGAAATGCCATGAATTCT 22  
|||||:|||  
Sbjct: 417 ATATTCTTTACGGTACTTGAGA 396

>miR1428b Score: 2.2 R03G\_08084  
Query: 1 TATAAGAAATGCCATGAATTCT 22  
||||\*||\*|||:|  
Sbjct: 180 ATATTCCTTACTGTACTTAAGG 159

>miR1428b Score: 0.2 R03G\_05325  
Query: 1 TATAAGAAATGCCATGAATTCT 22  
|||||:|||  
Sbjct: 654 ATATTCTTTACGGTACTTGAGA 633

>miR1428b Score: 0.0 R03G\_03721

Query: 1 TATAAGAAATGCCATGAATTCT 22  
|||||||  
Sbjct: 654 ATATTCTTTACGGTACTTAAGA 633  
>miR1428b Score: 0.5 R03G\_00141

Query: 1 TATAAGAAATGCCATGAATTCT 22  
|||||||:|||||||  
Sbjct: 654 ATATTCTTTATGGTACTTAAGA 633  
>miR1428b Score: 0.2 R03G\_00809

Query: 1 TATAAGAAATGCCATGAATTCT 22  
|||||||:||||  
Sbjct: 654 ATATTCTTTACGGTACTTGAGA 633  
>miR825-3p Score: 1.5 R03G\_17249

Query: 1 TGGTCTCGATAAGGTGCATTAAC 23  
|||||||\*|||||||\*|  
Sbjct: 515 ACCAGAGCTTTTCCACGTAATAG 493  
>miR825-3p Score: 0.5 R03G\_14979

Query: 1 TGGTCTCGATAAGGTGCATTAAC 23  
|||||||:|||||||\*|  
Sbjct: 515 ACCAGAGCTATTCCACGTAATAG 493  
>miR825-3p Score: 0.0 R03G\_14363

Query: 1 TGGTCTCGATAAGGTGCATTAAC 23  
|||||||:|||||||  
Sbjct: 473 ACCAGAGCTATTCCACGTAATTG 451  
>miR825-3p Score: 0.5 R03G\_13741

Query: 1 TGGTCTCGATAAGGTGCATTAAC 23  
|||||||:|||||||\*|  
Sbjct: 515 ACCAGAGCTATTCCACGTAATAG 493  
>miR825-3p Score: 1.5 R03G\_13755

Query: 1 TGGTCTCGATAAGGTGCATTAAC 23  
|||||||:|||||||\*|  
Sbjct: 515 ACCAGAGCTATTCCAAGTAATAG 493  
>miR825-3p Score: 0.5 R03G\_13863

Query: 1 TGGTCTCGATAAGGTGCATTAAC 23  
|||||||:|||||||\*|  
Sbjct: 215 ACCAGAGCTATTCCACGTAATAG 193  
>miR825-3p Score: 0.5 R03G\_13270

Query: 1 TGGTCTCGATAAGGTGCATTAAC 23  
|||||||:|||||||\*|  
Sbjct: 515 ACCAGAGCTATTCCACGTAATAG 493  
>miR825-3p Score: 0.5 R03G\_10774

Query: 1 TGGTCTCGATAAGGTGCATTAAC 23  
|||||||:|||||||\*|  
Sbjct: 482 ACCAGAGCTATTCCACGTAATAG 460  
>miR825-3p Score: 0.5 R03G\_08849

Query: 1 TGGTCTCGATAAGGTGCATTAAC 23

|||||\*|  
Sbjct: 515 ACCAGAGCTATTCCACGTAATAG 493  
>miR825-3p Score: 0.5 R03G\_05936  
Query: 1 TGGTCTCGATAAGGTGCATTAAC 23  
|||||\*|  
Sbjct: 515 ACCAGAGCTATTCCACGTAATAG 493  
>miR825-3p Score: 1.0 R03G\_05420  
Query: 1 TGGTCTCGATAAGGTGCATTAAC 23  
|||||\*\*|  
Sbjct: 376 ACCAGAGCTATTCCACGTAAAGG 354  
>miR825-3p Score: 0.8 R03G\_17276  
Query: 1 TGGTCTCGATAAGGTGCATTAAC 23  
:|||||\*|  
Sbjct: 605 GCCAGAGCTATTCCACGTAATAG 583  
>miR529a Score: 2.5 R03G\_16449  
Query: 1 TTGTCGCTGCTCTCTTCTTC 20  
|::||:||||\*|||||  
Sbjct: 362 AGTAGTGACGAAAGAAGAAG 343  
>miR529a Score: 2.5 R03G\_16256  
Query: 1 TTGTCGCTGCTCTCTTCTTC 20  
|:\*|||||\*|\*  
Sbjct: 1265 AGAAGCGACGAGAGAAGTAA 1246  
>miR529a Score: 2.5 R03G\_13394  
Query: 1 TTGTCGCTGCTCTCTTCTTC 20  
\*||||:||:|||||\*|||  
Sbjct: 169 CACAGTGATGAGAGAAAAAG 150  
>miR529a Score: 2.5 R03G\_12731  
Query: 1 TTGTCGCTGCTCTCTTCTTC 20  
||||:||:\*:|||||  
Sbjct: 683 AACAGTGATAGGAGAAGAAG 664  
>miR529a Score: 2.5 R03G\_05533  
Query: 1 TTGTCGCTGCTCTCTTCTTC 20  
|:||||\*|:|||||  
Sbjct: 617 AGCAGTAATGAGAGAAGAAG 598  
>miR529a Score: 2.0 R03G\_04591  
Query: 1 TTGTCGCTGCTCTCTTCTTC 20  
||||\*|||||\*|||  
Sbjct: 666 AACAACGACGAGAGAAAAAG 647  
>miR529a Score: 2.5 R03G\_02598  
Query: 1 TTGTCGCTGCTCTCTTCTTC 20  
\*|\*||\*|||||  
Sbjct: 685 TAGAGAGACGAGAGAAGAAG 666  
>miR529a Score: 2.5 R03G\_00635  
Query: 1 TTGTCGCTGCTCTCTTCTTC 20  
|:||||:||:|\*|||||

Sbjct: 1898 AGCAGTGATGAAAGAAGAAG 1879  
>miR7542 Score: 2.5 R03G\_16171  
Query: 1 TGTTGCGTTCATAGATGGTA 20  
|||||||\*||\*||\*||  
Sbjct: 4270 ACAACGCAAGTTTCCAC-AT 4252  
>miR7542 Score: 2.5 R03G\_16285  
Query: 1 TGTTGCGTTCATAGATGGTA 20  
||:||||:|||||||\*||\*||  
Sbjct: 72 ACGACGTAAGTATCTAGCTT 53  
>miR7542 Score: 2.5 R03G\_16050  
Query: 1 TGTTGCGTTCATAGATGGTA 20  
||\*||\*|||||||\*||  
Sbjct: 1669 ACTACCAAGTATCTACCTT 1650  
>miR7542 Score: 2.5 R03G\_13406  
Query: 1 TGTTGCGTTCATAGATGGTA 20  
:||||\*|||||||::|:|  
Sbjct: 613 GCAACTCAAGTATCTGTCGT 594  
>miR7542 Score: 2.5 R03G\_13422  
Query: 1 TGTTGCGTTCATAGATGGTA 20  
:||||\*|||||||::|:|  
Sbjct: 637 GCAACTCAAGTATCTGTCGT 618  
>miR7542 Score: 2.5 R03G\_12721  
Query: 1 TGTTGCGTTCATAGATGGTA 20  
||:||||:|||||||\*||\*||  
Sbjct: 57 ACGACGTAAGTATCTATAAA 38  
>miR7542 Score: 2.5 R03G\_12788  
Query: 1 TGTTGCGTTCATAGATGGTA 20  
|:|||||||\*||\*||  
Sbjct: 366 ATAACGCAAGTATCAGC-AT 348  
>miR7542 Score: 2.5 R03G\_12316  
Query: 1 TGTTGCGTTCATAGATGGTA 20  
:||||\*|||||||::|:|  
Sbjct: 613 GCAACTCAAGTATCTGTCGT 594  
>miR7542 Score: 2.5 R03G\_05240  
Query: 1 TGTTGCGTTCATAGATGGTA 20  
:||||\*|||||||:|:|  
Sbjct: 613 GCAATTCAAGTATCTGCCGT 594  
>miR9484 Score: 2.5 R03G\_07090  
Query: 1 TAGGCAAGGGAAGTCGGC 18  
||:|\*|||:|||||:|  
Sbjct: 2328 ATTCCTTCCTTTCAGCTG 2311  
>miR9484 Score: 2.5 R03G\_07600  
Query: 1 TAGGCAAGGGAAGTCGGC 18  
|||||||\*|||:|  
Sbjct: 951 ATCCGTTCCAACAGCTG 934

>miR9484 Score: 2.5 R03G\_05548  
Query: 1 TAGGCAAGGGAAGTCGGC 18  
\*|||||:|||||:\*\|  
Sbjct: 941 TTCCGTTTCCTTCAGTAG 924  
>miR9484 Score: 2.0 R03G\_04998  
Query: 1 TAGGCAAGGGAAGTCGGC 18  
\*|||||||\*|  
Sbjct: 223 CTCCGTTCCCTTCAGGTG 206  
>miR9484 Score: 2.5 R03G\_01220  
Query: 1 TAGGCAAGGGAAGTCGGC 18  
\*|:|||||:|||||\*|  
Sbjct: 2743 CTTCGTTCTTTCAGC-G 2727  
>miR9484 Score: 2.5 R03G\_01983  
Query: 1 TAGGCAAGGGAAGTCGGC 18  
|||||:||\*|:|:|  
Sbjct: 310 ATCCGTTTCCTACGGCTG 293  
>miR9557-5p Score: 2.5 R03G\_10700  
Query: 1 TTTTGCGTTTCAACTCGGTC 20  
:|||||:||||||\*|\*|  
Sbjct: 715 GAAACGTAAAGTTGAACT-G 697  
>miR9557-5p Score: 2.5 R03G\_05103  
Query: 1 TTTTGCGTTTCAACTCGGTC 20  
\*|||:||||||\*|||\*  
Sbjct: 1063 TAAATGCAAAGTTGTGCCAT 1044  
>miR9557-5p Score: 2.0 R03G\_02762  
Query: 1 TTTTGCGTTTCAACTCGGTC 20  
||\*|||:||||||\*||  
Sbjct: 571 AAACCGCAGAGTTGAGCGAG 552  
>miR9557-5p Score: 2.5 R03G\_03142  
Query: 1 TTTTGCGTTTCAACTCGGTC 20  
::|||||\*||||||:|  
Sbjct: 2374 GGAACGCATAGTTGAGTTAG 2355  
>miR9557-5p Score: 2.5 R03G\_03818  
Query: 1 TTTTGCGTTTCAACTCGGTC 20  
|||||\*|||||\*||\*||  
Sbjct: 3602 AAAACGAAAAGTTCAGCAAG 3583  
>miR166h-3p Score: 2.5 R03G\_12495  
Query: 1 TCGGACCAGGCTTCATTC-CC 20  
||||\*|\*|||||||\*||  
Sbjct: 644 AGCCGTTCCGAAGTAAGTGG 624  
>miR159a Score: 2.5 R03G\_16775  
Query: 1 TTTGGATTGAAGGGAGCTCT 20  
|||||||:|\*|||:|\*|  
Sbjct: 844 AAACCTAATGTCCCTTGA-A 826  
>miR159a Score: 2.5 R03G\_14108

Query: 1 TTTGGATTGAAGGGAGCTCT 20  
|||::||:||||:||\*||  
Sbjct: 185 AAATTTAGCTTCCTTCG-GA 167  
>miR159a Score: 2.5 R03G\_13093  
Query: 1 TTTGGATTGAAGGGAGCTCT 20  
\*\*|||||:|||||||\*|  
Sbjct: 311 TTACCTAATTTCCCTCGA-A 293  
>miR159a Score: 2.5 R03G\_10905  
Query: 1 TTTGGATTGAAGGGAGCTCT 20  
||||\*||||:||||\*\*  
Sbjct: 569 AAACCAAACCTTCCTCGATT 550  
>miR159a Score: 2.5 R03G\_08331  
Query: 1 TTTGGATTGAAGGGAGCTCT 20  
\*|||:\*||||:|||||  
Sbjct: 123 TAACTAACTTCTCTCGAGA 104  
>miR159a Score: 2.5 R03G\_02808  
Query: 1 TTTGGATTGAAGGGAGCTCT 20  
||||||:|:||||\*\*|  
Sbjct: 41 AAACCTAGTTTTCCCTCGTCA 22  
>miR4244 Score: 1.0 R03G\_13029  
Query: 1 TAGTTGTTCTGGAGATGTG 20  
|||||||\*|||  
Sbjct: 174 ATCAACAAGGACCTCAACAC 155  
>miR4244 Score: 2.2 R03G\_12482  
Query: 1 TAGTTGTTCTGGAGATG-TG 20  
|\*|||||||:|:|\*||  
Sbjct: 637 ACCAACAAGGACCTTTATTAC 617  
>miR4244 Score: 1.5 R03G\_12568  
Query: 1 TAGTTGTTCTGGAGATGTG 20  
|||||||:|\*|||  
Sbjct: 483 ATCAACAAGGACTTCCACAC 464  
>miR4244 Score: 1.2 R03G\_11695  
Query: 1 TAGTTGTTCTGGAGATGTG 20  
|||||||\*|:|  
Sbjct: 240 ATCAACAAGGACCTCCATAC 221  
>miR4244 Score: 2.5 R03G\_05564  
Query: 1 TAGTTGTTCTGGAGATGTG 20  
||\*|:||||\*|||||  
Sbjct: 721 ATCCATAAGGACATCTACAC 702  
>miR4244 Score: 2.2 R03G\_04377  
Query: 1 TAGTTGTTCTGGAGATGTG 20  
:||||\*||||:||||\*  
Sbjct: 570 GTCAAGAAGGACTTCTACAA 551  
>miR4244 Score: 0.5 R03G\_04497  
Query: 1 TAGTTGTTCTGGAGATGTG 20



```
||:|||||
Sbjct: 240 ATTAACAAGGACCTCTACAC 221
>miR4244 Score: 2.5 R03G_05311
Query: 1 TAGTTGTTCTGGAGATGTG 20
||*|:|||||:||||*||
Sbjct: 306 ATAAGCAAGGACTTCTA-AC 288
>miR4244 Score: 1.0 R03G_02365
Query: 1 TAGTTGTTCTGGAGATGTG 20
|||||*||||
Sbjct: 240 ATCAACAAGGACCTCCACAC 221
>miR4244 Score: 2.5 R03G_03106
Query: 1 TAGTTGTTCTGGAGATGTG 20
:|||||*||*|:
Sbjct: 204 GTCAACAAGGACTGCTA-AT 186
>miR4244 Score: 1.0 R03G_16979
Query: 1 TAGTTGTTCTGGAGATGTG 20
|||||*||||
Sbjct: 90 ATCAACAAGGACCTCCACAC 71
>miR912 Score: 2.5 R03G_08893
Query: 1 TGGATTGATCACCATCCCTGG-C 22
:|:|:|||||*||*|
Sbjct: 55 GCTTAGCTAGTGGTAGGTGCCAG 33
>miR2595 Score: 2.5 R03G_16060
Query: 1 TACATTTCTACTTCTCTGTCT 21
*|||||*||*|
Sbjct: 38 TTGTAAAGATGAAGAAAAACA 18
>miR2595 Score: 0.0 R03G_15743
Query: 1 TACATTTCTACTTCTCTGTCT 21
|||||*||||
Sbjct: 966 ATGTAAAGATGAAGAGACAGA 946
>miR166d-5p Score: 2.5 R03G_10240
Query: 1 GGAATGTTGTCTGGCTCGAG 20
:*|||||:||||:*
Sbjct: 1574 TCGTACAACAGATCGAGTTG 1555
>miR166d-5p Score: 2.5 R03G_10180
Query: 1 GGAATGTTGTCTGGCTCGAG 20
|*|||||:||||*|
Sbjct: 151 CATTACAACAGGTCGAGC-C 133
>miR6270 Score: 2.0 R03G_16714
Query: 1 TTCGCTATTGGAATCTTCATCT 22
||||*||:|||||*||
Sbjct: 276 AAGCTATGACCTTAGAAGCAGA 255
>miR6270 Score: 0.0 R03G_16803
Query: 1 TTCGCTATTGGAATCTTCATCT 22
|||||
```

Sbjct: 159 AAGCGATAACCTTAGAAGTAGA 138  
>miR6270 Score: 1.5 R03G\_14983  
Query: 1 TTCGCTATTGGAATCTTCATCT 22  
|||||||:|||||\*|||||

Sbjct: 723 AAGCGATAGCCTTAGCAGTAGA 702  
>miR6270 Score: 1.5 R03G\_13914  
Query: 1 TTCGCTATTGGAATCTTCATCT 22  
|||||||:|||||\*|||||

Sbjct: 918 AAGCGATAGCCTTAGCAGTAGA 897  
>miR6270 Score: 1.5 R03G\_12667  
Query: 1 TTCGCTATTGGAATCTTCATCT 22  
|||||||:|||||\*|||||

Sbjct: 288 AAGCGATAGCCTTAGCAGTAGA 267  
>miR6270 Score: 1.5 R03G\_12058  
Query: 1 TTCGCTATTGGAATCTTCATCT 22  
|||||||:|||||\*|||||

Sbjct: 918 AAGCGATAGCCTTAGCAGTAGA 897  
>miR6270 Score: 1.5 R03G\_10801  
Query: 1 TTCGCTATTGGAATCTTCATCT 22  
|||||||:|||||\*|||||

Sbjct: 723 AAGCGATAGCCTTAGCAGTAGA 702  
>miR6270 Score: 1.5 R03G\_09614  
Query: 1 TTCGCTATTGGAATCTTCATCT 22  
|||||||:|||||\*|||||

Sbjct: 249 AAGCGATAGCCTTAGCAGTAGA 228  
>miR6270 Score: 1.0 R03G\_05930  
Query: 1 TTCGCTATTGGAATCTTCATCT 22  
|||||||\*|||||||

Sbjct: 582 AAGCGATAACCCTAGAAGTAGA 561  
>miR6270 Score: 1.5 R03G\_04831  
Query: 1 TTCGCTATTGGAATCTTCATCT 22  
\*|||||||:||||:|||||

Sbjct: 1580 CAGCGATAACTTTAGGAGTAGA 1559  
>miR6270 Score: 1.5 R03G\_02233  
Query: 1 TTCGCTATTGGAATCTTCATCT 22  
|||||||:|||||\*|||||

Sbjct: 447 AAGCGATAGCCTTAGCAGTAGA 426  
>miR6270 Score: 0.0 R03G\_03556  
Query: 1 TTCGCTATTGGAATCTTCATCT 22  
|||||||

Sbjct: 723 AAGCGATAACCTTAGAAGTAGA 702  
>miR6270 Score: 1.0 R03G\_03583  
Query: 1 TTCGCTATTGGAATCTTCATCT 22  
|||||||\*|||||

Sbjct: 723 AAGCGATAACCTTAAAAGTAGA 702

>miR6270 Score: 0.0 R03G\_03780  
Query: 1 TTCGCTATTGGAATCTTCATCT 22  
|||||  
Sbjct: 159 AAGCGATAACCTTAGAAGTAGA 138

>miR6270 Score: 0.0 R03G\_03794  
Query: 1 TTCGCTATTGGAATCTTCATCT 22  
|||||  
Sbjct: 159 AAGCGATAACCTTAGAAGTAGA 138

>miR6270 Score: 1.5 R03G\_04116  
Query: 1 TTCGCTATTGGAATCTTCATCT 22  
||||\*|||||\*|||  
Sbjct: 282 AAGCTATAACCTTAGAAGAAGA 261

>miR6270 Score: 1.5 R03G\_17462  
Query: 1 TTCGCTATTGGAATCTTCATCT 22  
|||||||:|||||\*|||||  
Sbjct: 1050 AAGCGATAGCCTTAGCAGTAGA 1029

>miR6270 Score: 1.5 R03G\_17451  
Query: 1 TTCGCTATTGGAATCTTCATCT 22  
|||||||:|||||\*|||||  
Sbjct: 159 AAGCGATAGCCTTAGCAGTAGA 138

>miR6270 Score: 0.0 R03G\_17374  
Query: 1 TTCGCTATTGGAATCTTCATCT 22  
|||||  
Sbjct: 159 AAGCGATAACCTTAGAAGTAGA 138

>miR6270 Score: 0.0 R03G\_17281  
Query: 1 TTCGCTATTGGAATCTTCATCT 22  
|||||  
Sbjct: 159 AAGCGATAACCTTAGAAGTAGA 138

>miR5144-5p Score: 2.5 R03G\_17223  
Query: 1 TTCTTGTGCTGTGCAGTGA 19  
|||||||\*|\*|||\*|  
Sbjct: 95 AAGAACACGAAAAGTCAGT 77

>miR5144-5p Score: 2.5 R03G\_17017  
Query: 1 TTCTTGTGCTGTGCAGTGA 19  
|||||||\*|\*|||\*|  
Sbjct: 371 AAGAACACGAAAAGTCAGT 353

>miR5144-5p Score: 0.0 R03G\_17069  
Query: 1 TTCTTGTGCTGTGCAGTGA 19  
|||||  
Sbjct: 236 AAGAACACGACACGTCACT 218

>miR5144-5p Score: 1.8 R03G\_17083  
Query: 1 TTCTTGTGCTGTGCAGTGA 19  
|||||||\*|||::|  
Sbjct: 1721 AAGAACACGACAAGTCGTT 1703

>miR5144-5p Score: 2.5 R03G\_16725

Query: 1 TTCTTGTGCTGTGCAGTGA 19  
|||||||\*|\*|||\*|  
Sbjct: 113 AAGAACACGAAAAGTCAGT 95  
>miR5144-5p Score: 2.5 R03G\_16742  
Query: 1 TTCTTGTGCTGTGCAGTGA 19  
|||||||\*|\*|||\*|  
Sbjct: 371 AAGAACACGAAAAGTCAGT 353  
>miR5144-5p Score: 0.0 R03G\_16796  
Query: 1 TTCTTGTGCTGTGCAGTGA 19  
|||||||  
Sbjct: 371 AAGAACACGACACGTCAGT 353  
>miR5144-5p Score: 0.0 R03G\_16798  
Query: 1 TTCTTGTGCTGTGCAGTGA 19  
|||||||  
Sbjct: 371 AAGAACACGACACGTCAGT 353  
>miR5144-5p Score: 1.5 R03G\_16689  
Query: 1 TTCTTGTGCTGTGCAGTGA 19  
||\*|||||||:|  
Sbjct: 371 AAAAACACGACACGTCGCT 353  
>miR5144-5p Score: 2.5 R03G\_16698  
Query: 1 TTCTTGTGCTGTGCAGTGA 19  
|||||||\*|\*|||\*|  
Sbjct: 368 AAGAACACGAAAAGTCAGT 350  
>miR5144-5p Score: 2.5 R03G\_16706  
Query: 1 TTCTTGTGCTGTGCAGTGA 19  
|||||||\*|\*|||\*|  
Sbjct: 95 AAGAACACGAAAAGTCAGT 77  
>miR5144-5p Score: 2.5 R03G\_16372  
Query: 1 TTCTTGTGCTGTGCAGTGA 19  
|||||||\*|\*|||\*|  
Sbjct: 371 AAGAACACGAAAAGTCAGT 353  
>miR5144-5p Score: 2.5 R03G\_16383  
Query: 1 TTCTTGTGCTGTGCAGTGA 19  
|||||||\*|\*|||\*|  
Sbjct: 371 AAGAACACGAAAAGTCAGT 353  
>miR5144-5p Score: 2.5 R03G\_16420  
Query: 1 TTCTTGTGCTGTGCAGTGA 19  
|||||||\*|\*|||\*|  
Sbjct: 122 AAGAACACGAAAAGTCAGT 104  
>miR5144-5p Score: 0.5 R03G\_16431  
Query: 1 TTCTTGTGCTGTGCAGTGA 19  
|||||||:|||||  
Sbjct: 239 AAGAACACGACATGTCAGT 221  
>miR5144-5p Score: 0.0 R03G\_16142  
Query: 1 TTCTTGTGCTGTGCAGTGA 19



Sbjct: 206 AAGAACACGAAAAGTCAGT 188  
>miR5144-5p Score: 1.0 R03G\_11966  
Query: 1 TTCTTGTGCTGTGCAGTGA 19  
||\*|||||||||||||||  
Sbjct: 371 AAAAACACGACACGTCCT 353  
>miR5144-5p Score: 0.0 R03G\_12070  
Query: 1 TTCTTGTGCTGTGCAGTGA 19  
|||||||||||||||||  
Sbjct: 371 AAGAACACGACACGTCCT 353  
>miR5144-5p Score: 2.5 R03G\_12537  
Query: 1 TTCTTGTGCTGTGCAGTGA 19  
||||||||||\*|\*|\*|\*|  
Sbjct: 122 AAGAACACGAAAAGTCAGT 104  
>miR5144-5p Score: 2.5 R03G\_12653  
Query: 1 TTCTTGTGCTGTGCAGTGA 19  
||||||||||\*|\*|\*|\*|  
Sbjct: 644 AAGAACACGAAAAGTCAGT 626  
>miR5144-5p Score: 1.5 R03G\_11238  
Query: 1 TTCTTGTGCTGTGCAGTGA 19  
||\*|||||||||||||:|  
Sbjct: 239 AAAAACACGACACGTCGCT 221  
>miR5144-5p Score: 0.0 R03G\_11264  
Query: 1 TTCTTGTGCTGTGCAGTGA 19  
|||||||||||||||||  
Sbjct: 371 AAGAACACGACACGTCCT 353  
>miR5144-5p Score: 2.5 R03G\_11781  
Query: 1 TTCTTGTGCTGTGCAGTGA 19  
||||||||||\*|\*|\*|\*|  
Sbjct: 371 AAGAACACGAAAAGTCAGT 353  
>miR5144-5p Score: 0.0 R03G\_10516  
Query: 1 TTCTTGTGCTGTGCAGTGA 19  
|||||||||||||||||  
Sbjct: 371 AAGAACACGACACGTCCT 353  
>miR5144-5p Score: 0.0 R03G\_10729  
Query: 1 TTCTTGTGCTGTGCAGTGA 19  
|||||||||||||||||  
Sbjct: 371 AAGAACACGACACGTCCT 353  
>miR5144-5p Score: 0.0 R03G\_10743  
Query: 1 TTCTTGTGCTGTGCAGTGA 19  
|||||||||||||||||  
Sbjct: 371 AAGAACACGACACGTCCT 353  
>miR5144-5p Score: 0.0 R03G\_10773  
Query: 1 TTCTTGTGCTGTGCAGTGA 19  
|||||||||||||||||  
Sbjct: 371 AAGAACACGACACGTCCT 353

>miR5144-5p Score: 0.0 R03G\_10780  
Query: 1 TTCTTGTGCTGTGCAGTGA 19  
|||||  
Sbjct: 371 AAGAACACGACACGTCACT 353

>miR5144-5p Score: 1.5 R03G\_10798  
Query: 1 TTCTTGTGCTGTGCAGTGA 19  
||\*|||||:|  
Sbjct: 371 AAAAACACGACACGTCGCT 353

>miR5144-5p Score: 2.5 R03G\_09193  
Query: 1 TTCTTGTGCTGTGCAGTGA 19  
|||||\*|\*|||\*|  
Sbjct: 95 AAGAACACGAAAAGTCAGT 77

>miR5144-5p Score: 0.0 R03G\_09194  
Query: 1 TTCTTGTGCTGTGCAGTGA 19  
|||||  
Sbjct: 371 AAGAACACGACACGTCACT 353

>miR5144-5p Score: 0.0 R03G\_09542  
Query: 1 TTCTTGTGCTGTGCAGTGA 19  
|||||  
Sbjct: 371 AAGAACACGACACGTCACT 353

>miR5144-5p Score: 0.0 R03G\_09945  
Query: 1 TTCTTGTGCTGTGCAGTGA 19  
|||||  
Sbjct: 95 AAGAACACGACACGTCACT 77

>miR5144-5p Score: 0.0 R03G\_09967  
Query: 1 TTCTTGTGCTGTGCAGTGA 19  
|||||  
Sbjct: 371 AAGAACACGACACGTCACT 353

>miR5144-5p Score: 2.5 R03G\_07984  
Query: 1 TTCTTGTGCTGTGCAGTGA 19  
|||||\*|\*|||\*|  
Sbjct: 371 AAGAACACGAAAAGTCAGT 353

>miR5144-5p Score: 2.0 R03G\_08312  
Query: 1 TTCTTGTGCTGTGCAGTGA 19  
|||||\*||\*|||  
Sbjct: 234 AAGAACACGACAGGTGACT 216

>miR5144-5p Score: 0.0 R03G\_08660  
Query: 1 TTCTTGTGCTGTGCAGTGA 19  
|||||  
Sbjct: 371 AAGAACACGACACGTCACT 353

>miR5144-5p Score: 0.0 R03G\_07030  
Query: 1 TTCTTGTGCTGTGCAGTGA 19  
|||||  
Sbjct: 371 AAGAACACGACACGTCACT 353

>miR5144-5p Score: 0.0 R03G\_07038

Query: 1 TTCTTGTGCTGTGCAGTGA 19  
|||||  
Sbjct: 371 AAGAACACGACACGTCCT 353  
>miR5144-5p Score: 0.0 R03G\_07040

Query: 1 TTCTTGTGCTGTGCAGTGA 19  
|||||  
Sbjct: 371 AAGAACACGACACGTCCT 353  
>miR5144-5p Score: 1.5 R03G\_07103

Query: 1 TTCTTGTGCTGTGCAGTGA 19  
||\*|||||:|  
Sbjct: 95 AAAAACACGACACGTCGCT 77  
>miR5144-5p Score: 0.0 R03G\_07124

Query: 1 TTCTTGTGCTGTGCAGTGA 19  
|||||  
Sbjct: 371 AAGAACACGACACGTCCT 353  
>miR5144-5p Score: 2.5 R03G\_07137

Query: 1 TTCTTGTGCTGTGCAGTGA 19  
|||||\*|\*|\*|\*|  
Sbjct: 371 AAGAACACGAAAAGTCAGT 353  
>miR5144-5p Score: 2.5 R03G\_07702

Query: 1 TTCTTGTGCTGTGCAGTGA 19  
|||||\*|\*|\*|\*|  
Sbjct: 122 AAGAACACGAAAAGTCAGT 104  
>miR5144-5p Score: 2.5 R03G\_07705

Query: 1 TTCTTGTGCTGTGCAGTGA 19  
|||||\*|\*|\*|\*|  
Sbjct: 371 AAGAACACGAAAAGTCAGT 353  
>miR5144-5p Score: 1.0 R03G\_07860

Query: 1 TTCTTGTGCTGTGCAGTGA 19  
|||||\*|\*|\*|\*|  
Sbjct: 371 AAGAACACGAGACGTCCT 353  
>miR5144-5p Score: 2.5 R03G\_07867

Query: 1 TTCTTGTGCTGTGCAGTGA 19  
|||||\*|\*|\*|\*|  
Sbjct: 122 AAGAACACGAAAAGTCAGT 104  
>miR5144-5p Score: 1.5 R03G\_05628

Query: 1 TTCTTGTGCTGTGCAGTGA 19  
||\*|||||:|  
Sbjct: 371 AAAAACACGACACGTCGCT 353  
>miR5144-5p Score: 0.0 R03G\_05921

Query: 1 TTCTTGTGCTGTGCAGTGA 19  
|||||  
Sbjct: 371 AAGAACACGACACGTCCT 353  
>miR5144-5p Score: 0.0 R03G\_05939



|||||  
Sbjct: 371 AAGAACACGACACGTCCT 353  
>miR5144-5p Score: 1.0 R03G\_05953  
Query: 1 TTCTTGTGCTGTGCAGTGA 19  
||\*|||||  
Sbjct: 371 AAAAACACGACACGTCCT 353  
>miR5144-5p Score: 1.5 R03G\_05959  
Query: 1 TTCTTGTGCTGTGCAGTGA 19  
||\*|||||:|  
Sbjct: 371 AAAAACACGACACGTCGCT 353  
>miR5144-5p Score: 2.5 R03G\_06008  
Query: 1 TTCTTGTGCTGTGCAGTGA 19  
||:||\*|||||:|\*|  
Sbjct: 136 AAGGACAAGACACGTCG-T 119  
>miR5144-5p Score: 2.0 R03G\_06678  
Query: 1 TTCTTGTGCTGTGCAGTGA 19  
|||||\*||\*||  
Sbjct: 860 AAGAACACGACTCGTC-CT 843  
>miR5144-5p Score: 2.5 R03G\_06717  
Query: 1 TTCTTGTGCTGTGCAGTGA 19  
|||||\*||\*||\*|  
Sbjct: 371 AAGAACACGAAAAGTCAGT 353  
>miR5144-5p Score: 2.5 R03G\_04674  
Query: 1 TTCTTGTGCTGTGCAGTGA 19  
|||||\*||\*||\*|  
Sbjct: 122 AAGAACACGAAAAGTCAGT 104  
>miR5144-5p Score: 2.5 R03G\_04682  
Query: 1 TTCTTGTGCTGTGCAGTGA 19  
|||||\*||\*||\*|  
Sbjct: 371 AAGAACACGAAAAGTCAGT 353  
>miR5144-5p Score: 2.5 R03G\_04695  
Query: 1 TTCTTGTGCTGTGCAGTGA 19  
|||||\*||\*||\*|  
Sbjct: 161 AAGAACACGAAAAGTCAGT 143  
>miR5144-5p Score: 2.5 R03G\_04759  
Query: 1 TTCTTGTGCTGTGCAGTGA 19  
\*|||||\*||\*|||||  
Sbjct: 285 TAGAACACCACAGGTCCT 267  
>miR5144-5p Score: 0.0 R03G\_04803  
Query: 1 TTCTTGTGCTGTGCAGTGA 19  
|||||  
Sbjct: 371 AAGAACACGACACGTCCT 353  
>miR5144-5p Score: 0.0 R03G\_05264  
Query: 1 TTCTTGTGCTGTGCAGTGA 19  
|||||

Sbjct: 371 AAGAACACGACACGTCCT 353  
>miR5144-5p Score: 0.0 R03G\_05267  
Query: 1 TTCTTGTGCTGTGCAGTGA 19  
|||||

Sbjct: 371 AAGAACACGACACGTCCT 353  
>miR5144-5p Score: 2.5 R03G\_05268  
Query: 1 TTCTTGTGCTGTGCAGTGA 19  
|||||\*|\*|\*|\*|

Sbjct: 371 AAGAACACGAAAAGTCAGT 353  
>miR5144-5p Score: 0.0 R03G\_05435  
Query: 1 TTCTTGTGCTGTGCAGTGA 19  
|||||

Sbjct: 371 AAGAACACGACACGTCCT 353  
>miR5144-5p Score: 2.5 R03G\_02824  
Query: 1 TTCTTGTGCTGTGCAGTGA 19  
|||||\*|\*|\*|\*|

Sbjct: 371 AAGAACACGAAAAGTCAGT 353  
>miR5144-5p Score: 0.0 R03G\_02956  
Query: 1 TTCTTGTGCTGTGCAGTGA 19  
|||||

Sbjct: 371 AAGAACACGACACGTCCT 353  
>miR5144-5p Score: 0.5 R03G\_03557  
Query: 1 TTCTTGTGCTGTGCAGTGA 19  
|||||:|||||

Sbjct: 197 AAGAACACGACGCGTCCT 179  
>miR5144-5p Score: 0.0 R03G\_04207  
Query: 1 TTCTTGTGCTGTGCAGTGA 19  
|||||

Sbjct: 371 AAGAACACGACACGTCCT 353  
>miR5144-5p Score: 0.0 R03G\_04210  
Query: 1 TTCTTGTGCTGTGCAGTGA 19  
|||||

Sbjct: 371 AAGAACACGACACGTCCT 353  
>miR5144-5p Score: 2.5 R03G\_00238  
Query: 1 TTCTTGTGCTGTGCAGTGA 19  
|||||\*|\*|\*|\*|

Sbjct: 371 AAGAACACGAAAAGTCAGT 353  
>miR5144-5p Score: 0.0 R03G\_00256  
Query: 1 TTCTTGTGCTGTGCAGTGA 19  
|||||

Sbjct: 371 AAGAACACGACACGTCCT 353  
>miR5144-5p Score: 2.5 R03G\_00446  
Query: 1 TTCTTGTGCTGTGCAGTGA 19  
|||||\*|\*|\*|\*|

Sbjct: 804 AAGAACAAGACAGGTCAGT 786

>miR5144-5p Score: 2.5 R03G\_01205  
Query: 1 TTCTTGTGCTGTGCAGTGA 19  
|||||||\*|\*|||\*|  
Sbjct: 371 AAGAACACGAAAAGTCAGT 353

>miR5144-5p Score: 2.5 R03G\_01328  
Query: 1 TTCTTGTGCTGTGCAGTGA 19  
|||||||\*|\*|||\*|  
Sbjct: 371 AAGAACACGAAAAGTCAGT 353

>miR5144-5p Score: 0.0 R03G\_01942  
Query: 1 TTCTTGTGCTGTGCAGTGA 19  
|||||||  
Sbjct: 371 AAGAACACGACACGTCACT 353

>miR5144-5p Score: 2.5 R03G\_01962  
Query: 1 TTCTTGTGCTGTGCAGTGA 19  
|||||||\*|\*|||\*|  
Sbjct: 122 AAGAACACGAAAAGTCAGT 104

>miR5144-5p Score: 0.0 R03G\_17449  
Query: 1 TTCTTGTGCTGTGCAGTGA 19  
|||||||  
Sbjct: 371 AAGAACACGACACGTCACT 353

>miR5144-5p Score: 2.5 R03G\_17416  
Query: 1 TTCTTGTGCTGTGCAGTGA 19  
|||||||\*|\*|||\*|  
Sbjct: 371 AAGAACACGAAAAGTCAGT 353

>miR5144-5p Score: 2.5 R03G\_17399  
Query: 1 TTCTTGTGCTGTGCAGTGA 19  
|||||||\*|\*|||\*|  
Sbjct: 371 AAGAACACGAAAAGTCAGT 353

>miR5144-5p Score: 2.5 R03G\_17387  
Query: 1 TTCTTGTGCTGTGCAGTGA 19  
|||||||\*|\*|||\*|  
Sbjct: 371 AAGAACACGAAAAGTCAGT 353

>miR5144-5p Score: 2.5 R03G\_17355  
Query: 1 TTCTTGTGCTGTGCAGTGA 19  
|||||||\*|\*|||\*|  
Sbjct: 206 AAGAACACGAAAAGTCAGT 188

>miR5144-5p Score: 1.0 R03G\_17325  
Query: 1 TTCTTGTGCTGTGCAGTGA 19  
||\*|||||||  
Sbjct: 371 AAAAACACGACACGTCACT 353

>miR5144-5p Score: 1.5 R03G\_17308  
Query: 1 TTCTTGTGCTGTGCAGTGA 19  
||\*|||||||:|  
Sbjct: 371 AAAAACACGACACGTCGCT 353

>miR5144-5p Score: 2.5 R03G\_17291

Query: 1 TTCTTGTGCTGTGCAGTGA 19  
|||||||\*|\*|||\*|  
Sbjct: 371 AAGAACACGAAAAGTCAGT 353  
>miR6202 Score: 0.0 R03G\_16319  
Query: 1 TGAGGATTTAAGCTTTGAAG 20  
|||||||  
Sbjct: 4073 ACTCCTAAATTCGAAACTTC 4054  
>miR6202 Score: 2.0 R03G\_15536  
Query: 1 TGAGGATTTAAGCTTTGAAG 20  
|||||||:||||||\*\*||  
Sbjct: 3647 ACTCCTAAGTTCGAAA-ATC 3629  
>miR6202 Score: 0.0 R03G\_14345  
Query: 1 TGAGGATTTAAGCTTTGAAG 20  
|||||||  
Sbjct: 35 ACTCCTAAATTCGAAACTTC 16  
>miR6202 Score: 0.0 R03G\_12753  
Query: 1 TGAGGATTTAAGCTTTGAAG 20  
|||||||  
Sbjct: 35 ACTCCTAAATTCGAAACTTC 16  
>miR6202 Score: 0.0 R03G\_12207  
Query: 1 TGAGGATTTAAGCTTTGAAG 20  
|||||||  
Sbjct: 4073 ACTCCTAAATTCGAAACTTC 4054  
>miR6202 Score: 2.0 R03G\_10954  
Query: 1 TGAGGATTTAAGCTTTGAAG 20  
|\*||||:||||:|||||||  
Sbjct: 35 AGTCCTGAATTTGAAACTTC 16  
>miR6202 Score: 1.0 R03G\_09206  
Query: 1 TGAGGATTTAAGCTTTGAAG 20  
|||||||\*|\*|||  
Sbjct: 35 ACTCCTAAATTCCAA ACTTC 16  
>miR6202 Score: 2.5 R03G\_09360  
Query: 1 TGAGGATTTAAGCTTTGAAG 20  
||\*\*|||||||:|||  
Sbjct: 309 ACAACTAAATTCGAAATTTTC 290  
>miR6202 Score: 2.5 R03G\_09423  
Query: 1 TGAGGATTTAAGCTTTGAAG 20  
\*||\*|||:|||:|||||||  
Sbjct: 351 TCTGCTAGATTTGAAACTTC 332  
>miR6202 Score: 0.0 R03G\_08062  
Query: 1 TGAGGATTTAAGCTTTGAAG 20  
|||||||  
Sbjct: 854 ACTCCTAAATTCGAAACTTC 835  
>miR6202 Score: 0.0 R03G\_08114  
Query: 1 TGAGGATTTAAGCTTTGAAG 20

|||||  
Sbjct: 35 ACTCCTAAATTCGAAACTTC 16  
>miR6202 Score: 0.0 R03G\_06977  
Query: 1 TGAGGATTTAAGCTTTGAAG 20  
|||||  
Sbjct: 638 ACTCCTAAATTCGAAACTTC 619  
>miR6202 Score: 2.5 R03G\_05992  
Query: 1 TGAGGATTTAAGCTTTGAAG 20  
|||||\*\*||\*|  
Sbjct: 825 ACTCCTAAATTCGACTCTAC 806  
>miR6202 Score: 0.0 R03G\_04256  
Query: 1 TGAGGATTTAAGCTTTGAAG 20  
|||||  
Sbjct: 35 ACTCCTAAATTCGAAACTTC 16  
>miR6202 Score: 0.0 R03G\_02944  
Query: 1 TGAGGATTTAAGCTTTGAAG 20  
|||||  
Sbjct: 3392 ACTCCTAAATTCGAAACTTC 3373  
>miR6202 Score: 1.2 R03G\_00493  
Query: 1 TGAGGATTTAAGCTTTGAAG 20  
:\*|||||  
Sbjct: 377 GATCCTAAATTCGAAACTTC 358  
>miR6202 Score: 0.0 R03G\_00653  
Query: 1 TGAGGATTTAAGCTTTGAAG 20  
|||||  
Sbjct: 3983 ACTCCTAAATTCGAAACTTC 3964  
>miR6202 Score: 0.0 R03G\_01026  
Query: 1 TGAGGATTTAAGCTTTGAAG 20  
|||||  
Sbjct: 35 ACTCCTAAATTCGAAACTTC 16  
>miR6202 Score: 0.0 R03G\_01242  
Query: 1 TGAGGATTTAAGCTTTGAAG 20  
|||||  
Sbjct: 35 ACTCCTAAATTCGAAACTTC 16  
>miR6202 Score: 0.0 R03G\_01243  
Query: 1 TGAGGATTTAAGCTTTGAAG 20  
|||||  
Sbjct: 35 ACTCCTAAATTCGAAACTTC 16  
>miR6202 Score: 2.5 R03G\_01379  
Query: 1 TGAGGATTTAAGCTTTGAAG 20  
|||\*:||\*|||||  
Sbjct: 324 ACTATTA ACTTCGAAACTTC 305  
>miR6202 Score: 2.2 R03G\_17137  
Query: 1 TGAGGATTTAAGCTTTGAAG 20  
|\*|||\*|||||:

Sbjct: 1523 AGTCCCAAATTCGAACTTT 1504  
>miR9657a-3p Score: 1.5 R03G\_15836  
Query: 1 TGGTGCTTCCTGTCGTACAGGT 22  
|||\*|||||||:|||||||  
Sbjct: 112 ACCTCGAAGGACAGTATGTCCA 91  
>miR9657a-3p Score: 0.5 R03G\_06070  
Query: 1 TGGTGCTTCCTGTCGTACAGGT 22  
|||||||:|||||||  
Sbjct: 112 ACCACGAAGGACAGTATGTCCA 91  
>miR6462e Score: 2.5 R03G\_16134  
Query: 1 TTTTTCCTTTTGTCTACT 20  
|||:|||||||\*|\*|  
Sbjct: 646 AAAGACGAAAAACAAA-AA 628  
>miR6462e Score: 2.5 R03G\_16191  
Query: 1 TTTTTCCTTTTGTCTA-CT 20  
\*||||\*|||||||:|\*||  
Sbjct: 3674 CAAACTGAAAAACAGGTAGA 3654  
>miR6462e Score: 2.5 R03G\_16217  
Query: 1 TTTTTCCTTTTGTCTACT 20  
|||||||:||:||\*|\*||  
Sbjct: 339 AAAACGGGAAGACAAA-GA 321  
>miR6462e Score: 1.8 R03G\_16043  
Query: 1 TTTTTCCTTTTGTCTACT 20  
::|||||||:||||\*|  
Sbjct: 991 GGAAACGAAAAGCAGAT-A 973  
>miR6462e Score: 2.5 R03G\_15793  
Query: 1 TTTTTCCTTTTGTCTACT 20  
|||||:|||:||||:||\*|  
Sbjct: 865 AAAATGGAGAACGGA-AA 847  
>miR6462e Score: 2.5 R03G\_15284  
Query: 1 TTTTTCCTTTTGTCTACT 20  
|||:|||||||\*|\*|  
Sbjct: 646 AAAGACGAAAAACAAA-AA 628  
>miR6462e Score: 2.0 R03G\_15307  
Query: 1 TTTTTCCTTTTGTCTACT 20  
\*:|||||||:||\*||  
Sbjct: 1128 TGAAACGAAAAATAGA-GA 1110  
>miR6462e Score: 2.0 R03G\_15381  
Query: 1 TTTTTCCTTTTGTCTACT 20  
\*:|||||||:||||||\*|  
Sbjct: 842 TGAAACGGAAGAACAGATCA 823  
>miR6462e Score: 2.5 R03G\_15382  
Query: 1 TTTTTCCTTTTGTCTACT 20  
|:|||||||:||\*||\*||  
Sbjct: 2455 AGAAACGGAAGAAAAGA-GA 2437

>miR6462e Score: 0.0 R03G\_15250  
Query: 1 TTTTTCCTTTTTGTCTACT 20  
|||||  
Sbjct: 4129 AAAAACGGAAAAACAGATGA 4110

>miR6462e Score: 0.0 R03G\_14355  
Query: 1 TTTTTCCTTTTTGTCTACT 20  
|||||  
Sbjct: 2380 AAAAACGGAAAAACAGATGA 2361

>miR6462e Score: 2.5 R03G\_14686  
Query: 1 TTTTTCCTTTTTGTCTACT 20  
|||:|:|||||:|\*|  
Sbjct: 577 AAAAGTGGAAAAATAGA-AA 559

>miR6462e Score: 0.0 R03G\_13867  
Query: 1 TTTTTCCTTTTTGTCTACT 20  
|||||  
Sbjct: 4090 AAAAACGGAAAAACAGATGA 4071

>miR6462e Score: 0.0 R03G\_13920  
Query: 1 TTTTTCCTTTTTGTCTACT 20  
|||||  
Sbjct: 4174 AAAAACGGAAAAACAGATGA 4155

>miR6462e Score: 2.0 R03G\_14112  
Query: 1 TTTTTCCTTTTTGTCTACT 20  
|:|||||\*|\*|\*|  
Sbjct: 265 AGAAACGGAAAAAGAGATTA 246

>miR6462e Score: 2.2 R03G\_13564  
Query: 1 TTTTTCCTTTTTGTCTACT 20  
:|||||:|:||||\*|||  
Sbjct: 177 GAAAACGGAGAGACAGTTGA 158

>miR6462e Score: 0.0 R03G\_13749  
Query: 1 TTTTTCCTTTTTGTCTACT 20  
|||||  
Sbjct: 2683 AAAAACGGAAAAACAGATGA 2664

>miR6462e Score: 2.5 R03G\_12946  
Query: 1 TTTTTCCTTTTTGTCTACT 20  
|:|||||:|\*|\*|  
Sbjct: 232 AGAAACGGAAAAATAAA-GA 214

>miR6462e Score: 2.5 R03G\_12236  
Query: 1 TTTTTCCTTTTTGTCTAC-T 20  
|||||\*|\*|\*|:|\*|\*|  
Sbjct: 727 AAAAACGAAAAATAGACGTA 707

>miR6462e Score: 2.2 R03G\_12274  
Query: 1 TTTTTCCTTTTTGTCTACT 20  
:|\*|:|||||:|||||  
Sbjct: 394 GATGACGGAAAAATAGATGA 375

>miR6462e Score: 2.0 R03G\_12330

Query: 1 TTTTTCCTTTTTGTCTACT 20  
||:|:|||||:|||||\*||  
Sbjct: 592 AAGAGCGGAAGAACAGACGA 573  
>miR6462e Score: 1.5 R03G\_12588  
Query: 1 TTTTTCCTTTTTGTCTACT 20  
\*:|||||\*||  
Sbjct: 880 CGAAACGGAAAAACAGACGA 861  
>miR6462e Score: 2.0 R03G\_11598  
Query: 1 TTTTTCCTTTTTGTCTACT 20  
||||\*|||||:||||\*||  
Sbjct: 673 AAAAAAGGAAAAGCAGAAGA 654  
>miR6462e Score: 0.0 R03G\_11776  
Query: 1 TTTTTCCTTTTTGTCTACT 20  
|||||\*|||||\*||  
Sbjct: 1264 AAAAACGGAAAAACAGATGA 1245  
>miR6462e Score: 2.5 R03G\_10466  
Query: 1 TTTTTCCTTTTTGTCTA-CT 20  
|:||||\*|||||\*||  
Sbjct: 1360 AGAAAAGGAAAACAGAAAGA 1340  
>miR6462e Score: 0.0 R03G\_10558  
Query: 1 TTTTTCCTTTTTGTCTACT 20  
|||||\*|||||\*||  
Sbjct: 1927 AAAAACGGAAAAACAGATGA 1908  
>miR6462e Score: 2.5 R03G\_11011  
Query: 1 TTTTTCCTTTTTGTCTAC-T 20  
|||||\*|:|||||\*|\*|  
Sbjct: 525 AAAACGAAGAAACAGAAGCA 505  
>miR6462e Score: 2.5 R03G\_09886  
Query: 1 TTTTTCCTTTTTGTCTACT 20  
|||||\*|||||\*|\*|  
Sbjct: 295 AAAAAGTAAAAACAGTTAA 276  
>miR6462e Score: 2.5 R03G\_09933  
Query: 1 TTTTTCCTTTTTGTCTACT 20  
|||:|||||\*|\*|  
Sbjct: 646 AAAGACGGAAAAACAAA-AA 628  
>miR6462e Score: 2.5 R03G\_09957  
Query: 1 TTTTTCCTTTTTGTCTACT 20  
|||:|||||\*|\*|  
Sbjct: 646 AAAGACGGAAAAACAAA-AA 628  
>miR6462e Score: 0.0 R03G\_09965  
Query: 1 TTTTTCCTTTTTGTCTACT 20  
|||||\*|||||\*||  
Sbjct: 4174 AAAAACGGAAAAACAGATGA 4155  
>miR6462e Score: 2.5 R03G\_10229  
Query: 1 TTTTTCCTTTTTGTCTACT 20



|||:|||||||\*|\*|  
Sbjct: 58 AAAGACGGAAAAACAAA-AA 40  
>miR6462e Score: 2.2 R03G\_08307  
Query: 1 TTTTGCCTTTTGTCTACT 20  
:||||||\*|:||||\*|  
Sbjct: 2137 GAAAACGGACAAGCAGAT-A 2119  
>miR6462e Score: 2.0 R03G\_07491  
Query: 1 TTTTGCCTTTTGTCTACT 20  
||||\*|||||||:||\*|  
Sbjct: 46 AAAAAGGGAAAAACGGAT-A 28  
>miR6462e Score: 2.5 R03G\_07675  
Query: 1 TTTTGCCTTTTGTCTACT 20  
|||:|||||||\*|\*|  
Sbjct: 58 AAAGACGGAAAAACAAA-AA 40  
>miR6462e Score: 0.0 R03G\_05619  
Query: 1 TTTTGCCTTTTGTCTACT 20  
|||||||  
Sbjct: 2317 AAAAACGGAAAAACAGATGA 2298  
>miR6462e Score: 0.0 R03G\_06427  
Query: 1 TTTTGCCTTTTGTCTACT 20  
|||||||  
Sbjct: 3766 AAAAACGGAAAAACAGATGA 3747  
>miR6462e Score: 0.0 R03G\_06428  
Query: 1 TTTTGCCTTTTGTCTACT 20  
|||||||  
Sbjct: 3268 AAAAACGGAAAAACAGATGA 3249  
>miR6462e Score: 0.0 R03G\_06442  
Query: 1 TTTTGCCTTTTGTCTACT 20  
|||||||  
Sbjct: 4831 AAAAACGGAAAAACAGATGA 4812  
>miR6462e Score: 2.2 R03G\_06452  
Query: 1 TTTTGCCTTTTGTCTACT 20  
:||||\*|||||||\*|  
Sbjct: 565 GAAAAAGGAAAAACAGAACA 546  
>miR6462e Score: 2.2 R03G\_04477  
Query: 1 TTTTGCCTTTTGTCTACT 20  
:||\*|||||||:||\*|  
Sbjct: 2971 GAAACCGGAAAAATAGATAA 2952  
>miR6462e Score: 2.5 R03G\_04479  
Query: 1 TTTTGCCTTTTGTCTACT 20  
||:|||||:||\*||\*|  
Sbjct: 229 AAGAACGGAGAAAAAGATAA 210  
>miR6462e Score: 2.5 R03G\_02685  
Query: 1 TTTTGCCTTTTGTCTACT 20  
|:|||||:||||:||\*|

Sbjct: 741 AGAAACGGAGAAACGGAACA 722  
>miR6462e Score: 0.0 R03G\_02691  
Query: 1 TTTTTCCTTTTTGTCTACT 20  
|||||

Sbjct: 7663 AAAACGGAAAAACAGATGA 7644  
>miR6462e Score: 2.5 R03G\_02760  
Query: 1 TTTTTCCTTTTTGTCTACT 20  
|||:|\*|||:|||||\*||

Sbjct: 412 AAAGAAGGAGAAACAGAAGA 393  
>miR6462e Score: 2.5 R03G\_02836  
Query: 1 TTTTTCCTTTTTGTCTACT 20  
|||:|||||\*||

Sbjct: 646 AAAGACGGAAAAACAAA-AA 628  
>miR6462e Score: 0.0 R03G\_02959  
Query: 1 TTTTTCCTTTTTGTCTACT 20  
|||||

Sbjct: 4174 AAAACGGAAAAACAGATGA 4155  
>miR6462e Score: 2.5 R03G\_03104  
Query: 1 TTTTTCCTTTTTGTCTACT 20  
|||:|||||\*||

Sbjct: 646 AAAGACGGAAAAACAAA-AA 628  
>miR6462e Score: 0.0 R03G\_03547  
Query: 1 TTTTTCCTTTTTGTCTACT 20  
|||||

Sbjct: 4174 AAAACGGAAAAACAGATGA 4155  
>miR6462e Score: 0.0 R03G\_04115  
Query: 1 TTTTTCCTTTTTGTCTACT 20  
|||||

Sbjct: 1117 AAAACGGAAAAACAGATGA 1098  
>miR6462e Score: 2.5 R03G\_04218  
Query: 1 TTTTTCCTTTTTGTCTACT 20  
|||:|||||\*||

Sbjct: 646 AAAGACGGAAAAACAAA-AA 628  
>miR6462e Score: 2.5 R03G\_00105  
Query: 1 TTTTTCCTTTTTGTCTACT 20  
|||||\*||:||||\*||

Sbjct: 2170 AAAACGGTGAAGCAGAAGA 2151  
>miR6462e Score: 2.5 R03G\_00458  
Query: 1 TTTTTCCTTTTTGTCTA-CT 20  
|:|||\*|||||\*||

Sbjct: 1447 AGAAAAGGAAAAACAGAAAGA 1427  
>miR6462e Score: 2.5 R03G\_00717  
Query: 1 TTTTTCCTTTTTGTCTACT 20  
||||\*|||||\*|||\*||

Sbjct: 217 AAAACCGGAAAAAAGAAGA 198

>miR6462e Score: 2.0 R03G\_01140  
Query: 1 TTTTTCCTTTTTGTCTACT 20  
|||:|||||||\*||\*||  
Sbjct: 247 AAAAGCGGAAAAAAGAAGA 228

>miR6462e Score: 0.0 R03G\_01330  
Query: 1 TTTTTCCTTTTTGTCTACT 20  
|||||||  
Sbjct: 1408 AAAACGGAAAAACAGATGA 1389

>miR6462e Score: 2.5 R03G\_01423  
Query: 1 TTTTTCCTTTTTGTCTACT 20  
\*:|||||||:|\*|||||  
Sbjct: 25 TGAAACGGAAGAAAAGATGA 6

>miR6462e Score: 2.5 R03G\_01430  
Query: 1 TTTTTCCTTTTTGTCTACT 20  
\*:|||||||:|\*|||||  
Sbjct: 25 TGAAACGGAAGAAAAGATGA 6

>miR6462e Score: 0.0 R03G\_01613  
Query: 1 TTTTTCCTTTTTGTCTACT 20  
|||||||  
Sbjct: 2371 AAAACGGAAAAACAGATGA 2352

>miR6462e Score: 2.5 R03G\_01940  
Query: 1 TTTTTCCTTTTTGTCTACT 20  
|||:|||||||\*|\*|  
Sbjct: 646 AAAGACGGAAAAACAAA-AA 628

>miR6462e Score: 2.5 R03G\_02035  
Query: 1 TTTTTCCTTTTTGTCTACT 20  
\*|||||||\*|||||\*|  
Sbjct: 2454 TAAAACGGAACAACAGA-AA 2436

>miR6462e Score: 2.5 R03G\_02179  
Query: 1 TTTTTCCTTTTTGTCTACT 20  
\*||||||\*||:||||\*||  
Sbjct: 2214 CAAAACGGTAAGACAGACGA 2195

>miR6462e Score: 2.2 R03G\_02193  
Query: 1 TTTTTCCTTTTTGTCTACT 20  
:|||||\*|||||:|\*||  
Sbjct: 271 GAAAACGAAAAACGGAAGA 252

>miR6462e Score: 0.0 R03G\_02222  
Query: 1 TTTTTCCTTTTTGTCTACT 20  
|||||||  
Sbjct: 1228 AAAACGGAAAAACAGATGA 1209

>miR6462e Score: 0.0 R03G\_17404  
Query: 1 TTTTTCCTTTTTGTCTACT 20  
|||||||  
Sbjct: 802 AAAACGGAAAAACAGATGA 783

>miR6462e Score: 0.0 R03G\_17371

Query: 1 TTTTGCCTTTTGTCTACT 20  
|||||||  
Sbjct: 4129 AAAACGGAAAAACAGATGA 4110  
>miR6462e Score: 1.0 R03G\_17326  
Query: 1 TTTTGCCTTTTGTCTACT 20  
|||||||\*|||  
Sbjct: 4006 AAAACGGAAAAACACATGA 3987  
>miR5711 Score: 1.8 R03G\_12115  
Query: 1 TGTTCTGTGGGTTTTACCG 20  
:||||\*||||||\*||  
Sbjct: 4444 GCAAGAGACCCAAAAAT-GC 4426  
>miR5711 Score: 2.5 R03G\_12358  
Query: 1 TGTTCTGTGGGTTTTACCG 20  
||:||||\*|||:||||\*|  
Sbjct: 510 ACGAGACAACCAGAAATGTC 491  
>miR5711 Score: 2.5 R03G\_02261  
Query: 1 TGTTCTGTGGGTTTTACCG 20  
\*|\*|||||||:|\*||  
Sbjct: 1246 TCCAGACACCCAAAAGT-GC 1228  
>miR5711 Score: 2.2 R03G\_01981  
Query: 1 TGTTCTGTGGGTTTTACCG 20  
:||||||\*|||:||||\*|  
Sbjct: 510 GCAAGACAACCAGAAATGTC 491  
>miR7803b-3p Score: 0.5 R03G\_17223  
Query: 1 TGACACGTCGTCAATCATGTACT 23  
|||||||:|||||||  
Sbjct: 157 ACTGTGCAGCGGTTAGTACATGA 135  
>miR7803b-3p Score: 0.5 R03G\_17017  
Query: 1 TGACACGTCGTCAATCATGTACT 23  
|||||||:|||||||  
Sbjct: 433 ACTGTGCAGCGGTTAGTACATGA 411  
>miR7803b-3p Score: 0.5 R03G\_16725  
Query: 1 TGACACGTCGTCAATCATGTACT 23  
|||||||:|||||||  
Sbjct: 175 ACTGTGCAGCGGTTAGTACATGA 153  
>miR7803b-3p Score: 1.0 R03G\_16742  
Query: 1 TGACACGTCGTCAATCATGTACT 23  
|:|||||||:|||||||  
Sbjct: 433 ATTGTGCAGCGGTTAGTACATGA 411  
>miR7803b-3p Score: 0.8 R03G\_16698  
Query: 1 TGACACGTCGTCAATCATGTACT 23  
:|||||||:|||||||  
Sbjct: 430 GCTGTGCAGCGGTTAGTACATGA 408  
>miR7803b-3p Score: 1.0 R03G\_16706  
Query: 1 TGACACGTCGTCAATCATGTACT 23

|:|||||||:|||||||  
Sbjct: 157 ATTGTGCAGCGGTTAGTACATGA 135  
>miR7803b-3p Score: 1.0 R03G\_16372  
Query: 1 TGACACGTCGTCAATCATGTACT 23  
|:|||||||:|||||||  
Sbjct: 433 ATTGTGCAGCGGTTAGTACATGA 411  
>miR7803b-3p Score: 0.5 R03G\_16383  
Query: 1 TGACACGTCGTCAATCATGTACT 23  
|||||||:|||||||  
Sbjct: 433 ACTGTGCAGCGGTTAGTACATGA 411  
>miR7803b-3p Score: 0.5 R03G\_16420  
Query: 1 TGACACGTCGTCAATCATGTACT 23  
|||||||:|||||||  
Sbjct: 184 ACTGTGCAGCGGTTAGTACATGA 162  
>miR7803b-3p Score: 0.5 R03G\_16123  
Query: 1 TGACACGTCGTCAATCATGTACT 23  
|||||||:|||||||  
Sbjct: 433 ACTGTGCAGCGGTTAGTACATGA 411  
>miR7803b-3p Score: 0.5 R03G\_15271  
Query: 1 TGACACGTCGTCAATCATGTACT 23  
|||||||:|||||||  
Sbjct: 433 ACTGTGCAGCGGTTAGTACATGA 411  
>miR7803b-3p Score: 0.5 R03G\_15282  
Query: 1 TGACACGTCGTCAATCATGTACT 23  
|||||||:|||||||  
Sbjct: 157 ACTGTGCAGCGGTTAGTACATGA 135  
>miR7803b-3p Score: 0.5 R03G\_15261  
Query: 1 TGACACGTCGTCAATCATGTACT 23  
|||||||:|||||||  
Sbjct: 433 ACTGTGCAGCGGTTAGTACATGA 411  
>miR7803b-3p Score: 1.8 R03G\_14770  
Query: 1 TGACACGTCGTCAATCATGTACT 23  
:\*|||||||:|||||||  
Sbjct: 433 GCCGTGCAGCGGTTAGTACATGA 411  
>miR7803b-3p Score: 1.0 R03G\_13714  
Query: 1 TGACACGTCGTCAATCATGTACT 23  
|:|||||||:|||||||  
Sbjct: 433 ATTGTGCAGCGGTTAGTACATGA 411  
>miR7803b-3p Score: 0.5 R03G\_13852  
Query: 1 TGACACGTCGTCAATCATGTACT 23  
|||||||:|||||||  
Sbjct: 184 ACTGTGCAGCGGTTAGTACATGA 162  
>miR7803b-3p Score: 1.0 R03G\_12663  
Query: 1 TGACACGTCGTCAATCATGTACT 23  
|:|||||||:|||||||

Sbjct: 268 ATTGTGCAGCGGTTAGTACATGA 246  
>miR7803b-3p Score: 0.5 R03G\_11962  
Query: 1 TGACACGTCGTCAATCATGTACT 23  
|||||||:|||||||  
Sbjct: 157 ACTGTGCAGCGGTTAGTACATGA 135  
>miR7803b-3p Score: 0.8 R03G\_12537  
Query: 1 TGACACGTCGTCAATCATGTACT 23  
:|||||||:|||||||  
Sbjct: 184 GCTGTGCAGCGGTTAGTACATGA 162  
>miR7803b-3p Score: 1.5 R03G\_10771  
Query: 1 TGACACGTCGTCAATCATGTACT 23  
|||||||:||||\*|||||  
Sbjct: 184 ACTGTGCAGCGGTTAATACATGA 162  
>miR7803b-3p Score: 0.5 R03G\_10795  
Query: 1 TGACACGTCGTCAATCATGTACT 23  
|||||||:|||||||  
Sbjct: 433 ACTGTGCAGCGGTTAGTACATGA 411  
>miR7803b-3p Score: 1.0 R03G\_09193  
Query: 1 TGACACGTCGTCAATCATGTACT 23  
|:|||||||:|||||||  
Sbjct: 157 ATTGTGCAGCGGTTAGTACATGA 135  
>miR7803b-3p Score: 1.8 R03G\_07984  
Query: 1 TGACACGTCGTCAATCATGTACT 23  
:\*|||||||:|||||||  
Sbjct: 433 GCCGTGCAGCGGTTAGTACATGA 411  
>miR7803b-3p Score: 0.5 R03G\_06735  
Query: 1 TGACACGTCGTCAATCATGTACT 23  
|||||||:|||||||  
Sbjct: 157 ACTGTGCAGCGGTTAGTACATGA 135  
>miR7803b-3p Score: 0.5 R03G\_07137  
Query: 1 TGACACGTCGTCAATCATGTACT 23  
|||||||:|||||||  
Sbjct: 433 ACTGTGCAGCGGTTAGTACATGA 411  
>miR7803b-3p Score: 0.5 R03G\_07702  
Query: 1 TGACACGTCGTCAATCATGTACT 23  
|||||||:|||||||  
Sbjct: 184 ACTGTGCAGCGGTTAGTACATGA 162  
>miR7803b-3p Score: 0.5 R03G\_07705  
Query: 1 TGACACGTCGTCAATCATGTACT 23  
|||||||:|||||||  
Sbjct: 433 ACTGTGCAGCGGTTAGTACATGA 411  
>miR7803b-3p Score: 1.5 R03G\_07739  
Query: 1 TGACACGTCGTCAATCATGTACT 23  
||||||\*||:|||||||  
Sbjct: 184 ACTGTGCTGCGGTTAGTACATGA 162

>miR7803b-3p Score: 0.5 R03G\_07867  
Query: 1 TGACACGTCGTCAATCATGTACT 23  
|||||||:|||||||  
Sbjct: 184 ACTGTGCAGCGGTTAGTACATGA 162

>miR7803b-3p Score: 0.5 R03G\_05521  
Query: 1 TGACACGTCGTCAATCATGTACT 23  
|||||||\*  
Sbjct: 312 ACTGTGCAGCAGTTAGTACATGC 290

>miR7803b-3p Score: 0.5 R03G\_06433  
Query: 1 TGACACGTCGTCAATCATGTACT 23  
|||||||:|||||||  
Sbjct: 157 ACTGTGCAGCGGTTAGTACATGA 135

>miR7803b-3p Score: 0.5 R03G\_06717  
Query: 1 TGACACGTCGTCAATCATGTACT 23  
|||||||:|||||||  
Sbjct: 433 ACTGTGCAGCGGTTAGTACATGA 411

>miR7803b-3p Score: 0.5 R03G\_04674  
Query: 1 TGACACGTCGTCAATCATGTACT 23  
|||||||:|||||||  
Sbjct: 184 ACTGTGCAGCGGTTAGTACATGA 162

>miR7803b-3p Score: 1.0 R03G\_04682  
Query: 1 TGACACGTCGTCAATCATGTACT 23  
|:|||||||:|||||||  
Sbjct: 433 ATTGTGCAGCGGTTAGTACATGA 411

>miR7803b-3p Score: 0.5 R03G\_04695  
Query: 1 TGACACGTCGTCAATCATGTACT 23  
|||||||:|||||||  
Sbjct: 223 ACTGTGCAGCGGTTAGTACATGA 201

>miR7803b-3p Score: 0.5 R03G\_05268  
Query: 1 TGACACGTCGTCAATCATGTACT 23  
|||||||:|||||||  
Sbjct: 433 ACTGTGCAGCGGTTAGTACATGA 411

>miR7803b-3p Score: 1.0 R03G\_02824  
Query: 1 TGACACGTCGTCAATCATGTACT 23  
|:|||||||:|||||||  
Sbjct: 433 ATTGTGCAGCGGTTAGTACATGA 411

>miR7803b-3p Score: 0.8 R03G\_00238  
Query: 1 TGACACGTCGTCAATCATGTACT 23  
:|||||||:|||||||  
Sbjct: 433 GCTGTGCAGCGGTTAGTACATGA 411

>miR7803b-3p Score: 0.8 R03G\_01205  
Query: 1 TGACACGTCGTCAATCATGTACT 23  
:|||||||:|||||||  
Sbjct: 433 GCTGTGCAGCGGTTAGTACATGA 411

>miR7803b-3p Score: 0.5 R03G\_01328





|\*|||:||||:|||||||\*|||  
Sbjct: 713 AGAACGAGGGAGAAGAAGAAGAA 691  
>miR2082 Score: 2.5 R03G\_15097  
Query: 1 TGTTGTTCTTCTTCTTCTTCTT 22  
||:\*|||||||\*|||\*  
Sbjct: 1256 ACGAGAAGGAAGAAGAAAAGAC 1235  
>miR2082 Score: 2.5 R03G\_14402  
Query: 1 TGTTGTTCTTCTTCTTCTTCTT 22  
||||||\*||||||\*||\*|||  
Sbjct: 1227 ACAACAAAGAAGAAGTAGCGAA 1206  
>miR2082 Score: 2.5 R03G\_13891  
Query: 1 TGTTGTTCTTCTTCTTCTTCTT 22  
||\*|||\*|||||||\*|||  
Sbjct: 1140 ACCACACGGAAGAAGAAGAAGAA 1118  
>miR2082 Score: 2.5 R03G\_13935  
Query: 1 TGTTGTTCTTCTTCTTCTTCTT 22  
||:|||||||\*||||||\*\*||  
Sbjct: 1005 ACGACAAGGAAGTAGAAGATTAA 983  
>miR2082 Score: 2.5 R03G\_12789  
Query: 1 TGTTGTTCTTCTTCTTCTTCTT 22  
|||||||\*||||\*||\*|||  
Sbjct: 80 ACAACAAGGTAGAAAAA-AGAA 60  
>miR2082 Score: 2.0 R03G\_13069  
Query: 1 TGTTGTTCTTCTTCTTCTTCTT 22  
||||||\*||||||:|\*|||  
Sbjct: 962 ACAACAAAGAAGAAGGAAAGAA 941  
>miR2082 Score: 2.2 R03G\_13123  
Query: 1 TGTTGTTCTTCTTCTTCTTCTT 22  
|:||||:||:|||||||\*||:  
Sbjct: 834 ATAACAGGGGAGAAGAAGTGAG 813  
>miR2082 Score: 2.5 R03G\_12266  
Query: 1 TGTTGTTCTTCTTCTTCTTCTT 22  
|\*||||\*|||||||\*||  
Sbjct: 599 AAAACAAAGAAGAAGAAGAAAA 578  
>miR2082 Score: 2.5 R03G\_11023  
Query: 1 TGTTGTTCTTCTTCTTCTTCTT 22  
|||:|\*|||||||\*|||  
Sbjct: 1515 ACAGTAAAGAAGAAGAAGAAGAA 1493  
>miR2082 Score: 2.5 R03G\_09811  
Query: 1 TGTTGTTCTTCTTCTTCTTCTT 22  
||:|:|\*|||||||\*||  
Sbjct: 135 ACGATAAAGAAGAAGAAGAAAA 114  
>miR2082 Score: 2.5 R03G\_08027  
Query: 1 TGTTGTTCTTCTTCTTCTTCTT 22  
|\*|||||||\*|||\*||







```
|||||
Sbjct: 652 ACCCTTAGAACCGGAAAAGGT 632
>miR9674b-3p Score: 1.0 R03G_17251
Query: 1 TGAATATGCCAGAGCATCAG 20
||*|||||
Sbjct: 572 ACATATACGGTCTCGTAGTC 553
>miR9674b-3p Score: 1.2 R03G_17156
Query: 1 TGAATATGCCAGAGCATCAG 20
||*|||||:
Sbjct: 1121 ACCTATACGGTCTCGTAGTT 1102
>miR9674b-3p Score: 1.0 R03G_16366
Query: 1 TGAATATGCCAGAGCATCAG 20
||*|||||
Sbjct: 2864 ACATATACGGTCTCGTAGTC 2845
>miR9674b-3p Score: 0.5 R03G_13459
Query: 1 TGAATATGCCAGAGCATCAG 20
|||||*|
Sbjct: 269 ACTTATACGGTCTCGTAGCC 250
>miR9674b-3p Score: 2.2 R03G_00640
Query: 1 TGAATATGCCAGAGCATCAG 20
|:||||*:|||||:
Sbjct: 3146 ATTTATCTGGTCTCGTAGTT 3127
>miR9674b-3p Score: 0.0 R03G_01294
Query: 1 TGAATATGCCAGAGCATCAG 20
|||||
Sbjct: 1937 ACTTATACGGTCTCGTAGTC 1918
>miR528-5p Score: 2.5 R03G_13887
Query: 1 TGGAATGGGGATGAGAGG-AGG 21
*|||||:~*|||||*|||
Sbjct: 481 CCCTTACTACTACTCTCCATCC 460
>miR528-5p Score: 0.0 R03G_09951
Query: 1 TGGAATGGGGATGAGAGGAGG 21
|||||
Sbjct: 49 ACCTTACCCCTACTCTCCTCC 29
>miR528-5p Score: 2.2 R03G_06616
Query: 1 TGGAATGGGGATGAGAGGAGG 21
||:|||:|||||:|:|:|
Sbjct: 298 ACTTTATCCCTACTTTTCTTC 278
>miR528-5p Score: 2.5 R03G_05148
Query: 1 TGGAATGGGGATGAGAGGAGG 21
*|||||:|||||*||*||
Sbjct: 420 TCCTTATCCCTACTGTCCACC 400
>miR838-3p Score: 2.0 R03G_10839
Query: 1 TTTATACATCTTTTCTTGC-ACA 22
|||||:~*||*||
```

Sbjct: 177 AAATATGTAGAAAAGAGGGCCGT 155  
>miR838-3p Score: 2.5 R03G\_05998  
Query: 1 TTTATACATCTTTTCTTGCACA 22  
||:|||||||\*||\*||\*|  
Sbjct: 1176 AAGTATGTAGAAAAAA-GTCT 1156  
>miR838-3p Score: 2.0 R03G\_06049  
Query: 1 TTTATACATCTTTTCTTGCACA 22  
||||\*|||||||\*||\*|  
Sbjct: 237 AAATTTGTAGAAAAGAAGGT-T 217  
>miR838-3p Score: 2.5 R03G\_02327  
Query: 1 TTTATACATCTTTTCTTGCACA 22  
||||\*||:|||||||\*||\*||  
Sbjct: 1572 AAATAGGTGGAAAAGAAGGAGT 1551  
>miR838-3p Score: 1.5 R03G\_02329  
Query: 1 TTTATACATCTTTTCTTGCACA 22  
||||\*|||||||\*|||||  
Sbjct: 378 AAATCTGTAGAAAAGAA-GTGT 358  
>miR838-3p Score: 2.0 R03G\_00024  
Query: 1 TTTATACATCTTTTCTTGCACA 22  
||||\*|||||||\*||\*|  
Sbjct: 219 AAATTTGTAGAAAAGAAGGT-T 199  
>miR482e Score: 2.5 R03G\_00068  
Query: 1 TTGCCTATTCCTCTGCCAAG 20  
|||||||\*|||\*\*  
Sbjct: 296 AACGGATAAGGAGGAGGTGG 277  
>miR7716-5p Score: 0.5 R03G\_15587  
Query: 1 TAGTTGATAAGTAAGAACGAGAC 23  
|||:|||||||  
Sbjct: 234 ATCGACTATTCATTCTTGCTCTG 212  
>miR7716-5p Score: 2.2 R03G\_13422  
Query: 1 TAGTTGATAAGTAAGAACGAGAC 23  
|\*|||||||\*|:|\*|  
Sbjct: 263 AGCAACTATTCATTCTTG-TTAG 242  
>miR7716-5p Score: 1.5 R03G\_08791  
Query: 1 TAGTTGATAAGTAAGAACGAGAC 23  
|||||||\*|\*|||||||  
Sbjct: 150 ATCAACTATTCGGTCTTGCTCTG 128  
>miR3707 Score: 0.0 R03G\_13812  
Query: 1 TTGATCTGCCATTGATTCTTGAA 23  
|||||||  
Sbjct: 1007 AACTAGACGGTAACTAAGAACTT 985  
>miR5766 Score: 2.0 R03G\_16408  
Query: 1 TTAGGCAGAGGAATAGGCAAG 21  
||\*||\*|||||||  
Sbjct: 1091 AACCTTCTCCTTATCCGTTC 1071

>miR5766 Score: 0.5 R03G\_15259  
Query: 1 TTAGGCAGAGGAATAGGCAAG 21  
|||||\*|||  
Sbjct: 1091 AATCCGTCTCCTTATCCATTC 1071

>miR5766 Score: 0.0 R03G\_12958  
Query: 1 TTAGGCAGAGGAATAGGCAAG 21  
|||||  
Sbjct: 911 AATCCGTCTCCTTATCCGTTC 891

>miR5766 Score: 0.0 R03G\_12973  
Query: 1 TTAGGCAGAGGAATAGGCAAG 21  
|||||  
Sbjct: 1091 AATCCGTCTCCTTATCCGTTC 1071

>miR5766 Score: 0.0 R03G\_12650  
Query: 1 TTAGGCAGAGGAATAGGCAAG 21  
|||||  
Sbjct: 1091 AATCCGTCTCCTTATCCGTTC 1071

>miR5766 Score: 0.5 R03G\_11778  
Query: 1 TTAGGCAGAGGAATAGGCAAG 21  
|||||\*|||  
Sbjct: 1091 AATCCGTCTCCTTATCCATTC 1071

>miR5766 Score: 0.0 R03G\_07982  
Query: 1 TTAGGCAGAGGAATAGGCAAG 21  
|||||  
Sbjct: 1091 AATCCGTCTCCTTATCCGTTC 1071

>miR5766 Score: 0.0 R03G\_08650  
Query: 1 TTAGGCAGAGGAATAGGCAAG 21  
|||||  
Sbjct: 1091 AATCCGTCTCCTTATCCGTTC 1071

>miR5766 Score: 0.0 R03G\_08655  
Query: 1 TTAGGCAGAGGAATAGGCAAG 21  
|||||  
Sbjct: 1091 AATCCGTCTCCTTATCCGTTC 1071

>miR5766 Score: 0.0 R03G\_07035  
Query: 1 TTAGGCAGAGGAATAGGCAAG 21  
|||||  
Sbjct: 1091 AATCCGTCTCCTTATCCGTTC 1071

>miR5766 Score: 0.0 R03G\_05217  
Query: 1 TTAGGCAGAGGAATAGGCAAG 21  
|||||  
Sbjct: 1091 AATCCGTCTCCTTATCCGTTC 1071

>miR5766 Score: 0.0 R03G\_02849  
Query: 1 TTAGGCAGAGGAATAGGCAAG 21  
|||||  
Sbjct: 1091 AATCCGTCTCCTTATCCGTTC 1071

>miR5766 Score: 0.0 R03G\_02851

Query: 1 TTAGGCAGAGGAATAGGCAAG 21  
|||||||  
Sbjct: 1091 AATCCGTCTCCTTATCCGTTC 1071  
>miR5766 Score: 2.5 R03G\_03289  
Query: 1 TTAGGCAGAGGAATAGGCAAG 21  
\*:|||:|:|:|  
Sbjct: 998 CGTCCGTTTTCTTGTCGTTC 978  
>miR5766 Score: 0.0 R03G\_00697  
Query: 1 TTAGGCAGAGGAATAGGCAAG 21  
|||||||  
Sbjct: 1091 AATCCGTCTCCTTATCCGTTC 1071  
>miR5766 Score: 0.0 R03G\_01965  
Query: 1 TTAGGCAGAGGAATAGGCAAG 21  
|||||||  
Sbjct: 1091 AATCCGTCTCCTTATCCGTTC 1071  
>miR5766 Score: 0.0 R03G\_17425  
Query: 1 TTAGGCAGAGGAATAGGCAAG 21  
|||||||  
Sbjct: 1091 AATCCGTCTCCTTATCCGTTC 1071  
>miR7763-5p Score: 2.0 R03G\_05488  
Query: 1 AACTTCATCGTGTGGGATAG 22  
|||||||:|\*|||\*|||  
Sbjct: 1829 TTGAAGTAGTACTACCCAATC 1808  
>miR7763-5p Score: 2.0 R03G\_00708  
Query: 1 AACTTCATCGTGTGGGATAG 22  
|||||||:|\*|||\*|||  
Sbjct: 1760 TTGAAGTAGTACTACCCAATC 1739  
>miR5227 Score: 2.5 R03G\_17229  
Query: 1 TGAAGAAGAAGAAGTTGAGGAT 22  
\*:|||||||\*|||\*|  
Sbjct: 504 CTTTCTTCTTCTTCCACTCC-A 484  
>miR5227 Score: 2.5 R03G\_12224  
Query: 1 TGAAGAAGAAGAAGTTGA-GGAT 22  
|||||\*|||||||\*\*\*|||  
Sbjct: 1289 ACTTCTGCTTCTTCAACAACTA 1267  
>miR5227 Score: 2.0 R03G\_10883  
Query: 1 TGAAGAAGAAGAAGTTGAGGAT 22  
|:|\*|||||||\*|  
Sbjct: 759 ATTCCTTCTTCTTCAACTCC-A 739  
>miR5227 Score: 1.0 R03G\_10898  
Query: 1 TGAAGAAGAAGAAGTTGAGG-AT 22  
|||||||:|||||\*||  
Sbjct: 129 ACTTCTTCTTCTTAACTCCTTA 107  
>miR5227 Score: 2.0 R03G\_11015  
Query: 1 TGAAGAAGAAGAAGTTGA-GGAT 22



|:|||||||||||:|\*|||:  
Sbjct: 42 ATTTCTTCTTCTTCAGCTATCTG 20  
>miR5227 Score: 2.5 R03G\_11040  
Query: 1 TGAAGAAGAAGAAGTTGAGGAT 22  
|||||||\*||\*||\*|||  
Sbjct: 93 ACTTCTTCTACTTGAAC-CCTA 73  
>miR5227 Score: 2.2 R03G\_09917  
Query: 1 TGAAGAAGAAGAAGTTGAGGAT 22  
\*|||:|||||||\*||:|||  
Sbjct: 705 TCTTTTCTTCTTCACCTTCTA 684  
>miR5227 Score: 2.0 R03G\_10043  
Query: 1 TGAAGAAGAAGAAGTTGAGGAT 22  
\*|||||||||||:||\*||:  
Sbjct: 957 CCTTCTTCTTCTTCGACT-TTG 937  
>miR5227 Score: 2.5 R03G\_07000  
Query: 1 TGAAGAAGAAGAAGTTGAGGAT 22  
\*|||||||||||\*\*|||||  
Sbjct: 192 TCTTCTTCTTCTTCTTCTCCTA 171  
>miR5227 Score: 2.5 R03G\_07001  
Query: 1 TGAAGAAGAAGAAGTTGAGGAT 22  
\*|||||||||||\*\*|||||  
Sbjct: 192 TCTTCTTCTTCTTCTTCTCCTA 171  
>miR5227 Score: 2.5 R03G\_07279  
Query: 1 TGAAGAAGAAGAAGTTGAGGAT 22  
||\*|||||||||:|||||  
Sbjct: 3594 ACTCCTTCTTCTTCGCCTCCTA 3573  
>miR5227 Score: 2.0 R03G\_05565  
Query: 1 TGAAGAAGAAGAAGTTGAGGAT 22  
|||||||||||\*||\*||\*  
Sbjct: 684 ACTTCTTCTTCTTCCACACCTC 663  
>miR5227 Score: 2.2 R03G\_06171  
Query: 1 TGAAGAAGAAGAAGTTGA-GGAT 22  
\*||\*|||||||||||\*|||  
Sbjct: 216 TCTTGTTCTTCTTCAACTTTCTA 194  
>miR5227 Score: 1.5 R03G\_06538  
Query: 1 TGAAGAAGAAGAAGTTGA-GGAT 22  
\*|||||||||||\*||\*  
Sbjct: 1151 CCTTCTTCTTCTTCAACTCCCTC 1129  
>miR5227 Score: 2.2 R03G\_03357  
Query: 1 TGAAGAAGAAGAAGTTGAGGAT 22  
\*|||||||||||\*|||:||\*  
Sbjct: 69 TCTTCTTCTTCTTGAACCTTCTT 48  
>miR5227 Score: 2.5 R03G\_03738  
Query: 1 TGAAGAAGAAGAAGTTGAGGAT 22  
|||||||||||:\*\*\*|||

Sbjct: 1782 ACTTCTTCTTCTTCGTCGACTA 1761  
>miR5227 Score: 2.5 R03G\_00057  
Query: 1 TGAAGAAGAAGAAGTTGAGGAT 22  
||||:|||||||:|\*\*|||

Sbjct: 1677 ACTTTTCTTCTTCGAGACCTA 1656  
>miR5227 Score: 2.5 R03G\_01232  
Query: 1 TGAAGAAGAAGAAGTTGA-GGAT 22  
\*|||||||:|\*\*|\*|

Sbjct: 189 CCTTCTTCTTCAGCTAGCCA 167  
>miR5227 Score: 2.5 R03G\_01236  
Query: 1 TGAAGAAGAAGAAGTTGA-GGAT 22  
\*|||||||:|\*\*|\*|

Sbjct: 189 CCTTCTTCTTCAGCTAGCCA 167  
>miR5227 Score: 2.2 R03G\_01458  
Query: 1 TGAAGAAGAAGAAGTTGAGGAT 22  
\*|||||||\*||:|\*|

Sbjct: 879 TCTTCTTCTTCATCTTCTC 858  
>miR2644 Score: 2.2 R03G\_13025  
Query: 1 TCTCTTCAGTTGATGGTT-GT 20  
||||:|||||||\*:\*||

Sbjct: 2033 AGAGAGGTCAACTACCTGACA 2013  
>miR2644 Score: 2.2 R03G\_12411  
Query: 1 TCTCTTCAGTTGATGGTTGT 20  
:\*|||||:|||||||\*|

Sbjct: 979 GAAGAAGTTAACTACCAA-A 961  
>miR2644 Score: 2.5 R03G\_11845  
Query: 1 TCTCTTCAGTTGATGGTTGT 20  
||\*||||\*||||||\*||

Sbjct: 472 AGTGAAGTGA ACTACCA-CA 454  
>miR2644 Score: 2.5 R03G\_09501  
Query: 1 TCTCTTCAGTTGATGGTTGT 20  
\*||||||:|:|||||\*|

Sbjct: 175 TGAGAAGTTGATTACCAA-A 157  
>miR2644 Score: 2.5 R03G\_07648  
Query: 1 TCTCTTCAGTTGATGGTT-GT 20  
\*||\*|||||:||||||\*||

Sbjct: 661 CGTGAAGTCGACTACCAAACA 641  
>miR2644 Score: 1.5 R03G\_06059  
Query: 1 TCTCTTCAGTTGATGGTTGT 20  
|\*|||||||:||||

Sbjct: 1018 AAAGAAGTCAACTACTAACA 999  
>miR2644 Score: 2.5 R03G\_04985  
Query: 1 TCTCTTCAGTTGATGGTTGT 20  
\*|||||||\*:\*||||:|||

Sbjct: 322 TGAGAAGTCATTTACCGACA 303

>miR2644 Score: 2.5 R03G\_00074  
Query: 1 TCTCTTCAGTTGATGGTTGT 20  
||||\*||||:|\*||||  
Sbjct: 475 AGAGATGTCAATTAACAACA 456

>miR2644 Score: 1.5 R03G\_00272  
Query: 1 TCTCTTCAGTTGATGGTTGT 20  
\*|:|||||||\*||  
Sbjct: 5305 CGGGAAGTCAACTACCA-CA 5287

>miR2644 Score: 2.5 R03G\_01873  
Query: 1 TCTCTTCAGTTGATGGTTGT 20  
||||:|:||||:|:|:|\*  
Sbjct: 872 AGAGAGGTTAACTGCCAGTC 853

>miR1028a-3p Score: 2.5 R03G\_15867  
Query: 1 TGACATTGTAGATGTAGTT 19  
||||\*||||:||||\*|||  
Sbjct: 1050 ACTGGAACATTTACAACAA 1032

>miR1028a-3p Score: 2.5 R03G\_12933  
Query: 1 TGACATTGTAGATGTAGTT 19  
|\*|||||||\*||\*  
Sbjct: 1231 AATGTAACATCTACACCAT 1213

>miR1028a-3p Score: 2.5 R03G\_11205  
Query: 1 TGACATTGTAGATGTAGTT 19  
|||||\*|:|||||||\*||  
Sbjct: 1762 ACTGTATTATCTACATAAA 1744

>miR1028a-3p Score: 2.5 R03G\_11696  
Query: 1 TGACATTGTAGATGTAGTT 19  
||\*|||||||\*||\*  
Sbjct: 484 ACAGTAACATCTACATATA 466

>miR1028a-3p Score: 1.2 R03G\_09309  
Query: 1 TGACATTGTAGATGTAGTT 19  
|||||||\*|\*|||||:|  
Sbjct: 88 ACTGTAACAACACTACATCGA 70

>miR1028a-3p Score: 2.5 R03G\_09692  
Query: 1 TGACATTGTAGATGTAGTT 19  
|:|||||||\*|\*||\*||  
Sbjct: 1657 ATTGTAACAGCTACAT-AA 1640

>miR1028a-3p Score: 2.5 R03G\_08194  
Query: 1 TGACATTGTAGATGTAGTT 19  
|||||||\*|\*||\*||\*|  
Sbjct: 777 ACTGTAACATCCACAACCA 759

>miR1028a-3p Score: 2.5 R03G\_07870  
Query: 1 TGACATTGTAGATGTAGTT 19  
||||\*||||:||||\*|||  
Sbjct: 1050 ACTGGAACATTTACAACAA 1032

>miR1028a-3p Score: 2.5 R03G\_07958

Query: 1 TGACATTGTAGATGTAGTT 19  
|||\*\*|||||||\*|  
Sbjct: 2736 ACTAAAACATCTACATCCA 2718  
>miR1028a-3p Score: 1.8 R03G\_06288  
Query: 1 TGACATTGTAGATGTAGTT 19  
|||||||:|:|:|  
Sbjct: 43 ACTGTAACATCTGTGTCAG 25  
>miR1028a-3p Score: 2.5 R03G\_05417  
Query: 1 TGACATTGTAGATGTAGTT 19  
|||\*|||||:||||\*|||  
Sbjct: 402 ACTGGAACATTTACAACAA 384  
>miR1028a-3p Score: 2.0 R03G\_16994  
Query: 1 TGACATTGTAGATGTAGTT 19  
||\*||\*|||||||  
Sbjct: 489 ACAGTCACATCTACATCAA 471  
>miR863-5p Score: 1.8 R03G\_14810  
Query: 1 TTATGGCTTGTTGTATATCAT 21  
|||||:|||||||\*|||  
Sbjct: 508 AATACTGAACAACATAAGGTA 488  
>miR863-5p Score: 2.5 R03G\_14232  
Query: 1 TTATGGCTTGTTGTATATCAT 21  
\*|||||||\*||\*||\*  
Sbjct: 187 CATACCGAACAACACATCGTT 167  
>miR863-5p Score: 2.2 R03G\_08164  
Query: 1 TTATGGCTTGTTGTATATCAT 21  
:|||||||\*||||||\*||\*  
Sbjct: 772 GATACCGAAGAACATATCGTC 752  
>miR863-5p Score: 2.5 R03G\_00542  
Query: 1 TTATGGCTTGTTGTATATC-AT 21  
|:|||:|||||\*|||||\*||  
Sbjct: 730 AGTACTGAACAAAATATAGTTA 709  
>miR863-5p Score: 2.5 R03G\_17110  
Query: 1 TTATGGCTTGTTGTATATCAT 21  
\*|||:\*|||||||\*|||  
Sbjct: 265 TATATGGAACAACATATTGTA 245  
>miR1122 Score: 2.5 R03G\_16654  
Query: 1 TGATATCATCGGCATTTGGA 20  
\*|||||||\*:|||||\*|  
Sbjct: 2476 CCTATAGTAGGTGTAAACGT 2457  
>miR1122 Score: 1.8 R03G\_14134  
Query: 1 TGATATCATCGGCATTTGGA 20  
|||||:|||||\*||||:|  
Sbjct: 169 ACTATGGTAGCCATAAATCT 150  
>miR1122 Score: 2.5 R03G\_10350  
Query: 1 TGATATCATCGGCATTTG-GA 20

```
|||:|||||||*||||**|
Sbjct: 880 ACTGTAGTAGCCCTAAACAGT 860
>miR1122 Score: 2.5 R03G_10357
Query: 1 TGATATCATCGGCATTTGGA 20
*|||||||*|*|
Sbjct: 136 TCTATAGTAGCCGTATGCGT 117
>miR1122 Score: 0.0 R03G_10867
Query: 1 TGATATCATCGGCATTTGGA 20
|||||||
Sbjct: 280 ACTATAGTAGCCGTAAACCT 261
>miR1122 Score: 1.8 R03G_09240
Query: 1 TGATATCATCGGCATTTGGA 20
::|||||||:|||||::|
Sbjct: 466 GTTATAGTAGTCGTAAATTT 447
>miR1122 Score: 2.5 R03G_09310
Query: 1 TGATATCATCGGCATTTGGA 20
*|||||||:||||*|||
Sbjct: 364 TCTATAGTAGTCGTAG-CCT 346
>miR1122 Score: 0.0 R03G_05937
Query: 1 TGATATCATCGGCATTTGGA 20
|||||||
Sbjct: 538 ACTATAGTAGCCGTAAACCT 519
>miR1122 Score: 2.5 R03G_05252
Query: 1 TGATATCATCGGCATTTGG-A 20
|||||||*||||*||*|
Sbjct: 1177 ACTATAGTAGACGTACACCAT 1157
>miR1122 Score: 2.5 R03G_05317
Query: 1 TGATATCATCGGCATTTGGA 20
|||||||:|*|:||||*
Sbjct: 448 ACTATAGTAGTCCTGAACCA 429
>miR1122 Score: 2.5 R03G_02783
Query: 1 TGATATCATCGGCATTTGGA 20
|||||||*||||*::|
Sbjct: 1900 ACTATAGTAGACGTAATTTT 1881
>miR2916 Score: 2.0 R03G_02179
Query: 1 TAGGGGATCGAAGATGATCAGAT 23
|||||||*||||:|||||*
Sbjct: 2338 ATCCCCTAGGTTCTGCTAGTCTT 2316
>miR6422 Score: 2.5 R03G_16741
Query: 1 TGTAGATAATGAATGGATAAAGGT 23
*||*|*|||||||
Sbjct: 744 CCAACCATTACTTACCTATTCCA 722
>miR6422 Score: 2.5 R03G_16368
Query: 1 TGTAGATAATGAATGGATAAAGGT 23
*||*|*|||||||
```



>miR6422 Score: 2.5 R03G\_01324  
Query: 1 TGTAGATAATGAATGGATAAGGT 23  
\*||\*|||  
Sbjct: 426 CCAACCATTACTTACCTATTCCA 404

>miR6422 Score: 2.5 R03G\_01716  
Query: 1 TGTAGATAATGAATGGATAAGGT 23  
\*||\*|||  
Sbjct: 1575 CCAACCATTACTTACCTATTCCA 1553

>miR1857-5p Score: 2.2 R03G\_14280  
Query: 1 TGGATTCTTTTGGAGATGCGG 21  
|||:|\*|||  
Sbjct: 49 ACCTAAGAAAACCTTTAACGTC 29

>miR1857-5p Score: 2.2 R03G\_12733  
Query: 1 TGGATTCTTTTGGAGATGCGG 21  
:|\*|||  
Sbjct: 426 GTCTAAGAAAACCTTTA-GTT 407

>miR1857-5p Score: 2.5 R03G\_10745  
Query: 1 TGGATTCTTTTGGAGATGCGG 21  
:|\*|||\*|  
Sbjct: 1398 GCCTAAGAAAAGTTCTAC-CT 1379

>miR1857-5p Score: 2.5 R03G\_07862  
Query: 1 TGGATTCTTTTGGAGATGCGG 21  
:|\*|||\*|  
Sbjct: 2541 GCCTAAGAAAAGTTCTAC-CT 2522

>miR1857-5p Score: 2.5 R03G\_05880  
Query: 1 TGGATTCTTTTGGAGATGCGG 21  
|||\*|||:|\*  
Sbjct: 217 ACCTAAGTAAATCTCTATGTG 197

>miR1857-5p Score: 2.2 R03G\_03713  
Query: 1 TGGATTCTTTTGGAGATGCGG 21  
|||:|\*|||\*  
Sbjct: 469 ACCTAAGGAACTTCTAAATC 449

>miR1857-5p Score: 2.5 R03G\_04137  
Query: 1 TGGATTCTTTTGGAGATGCGG 21  
|||:|\*|||:|\*  
Sbjct: 1104 ACCTAGGAAAACCTTCTGT-TC 1085

>miR5293 Score: 0.0 R03G\_17021  
Query: 1 TGATGAAGAAGTGGCGCAGAAGA 23  
|||  
Sbjct: 2846 ACTACTTCTTCACCGCGTCTTCT 2824

>miR5293 Score: 0.0 R03G\_16693  
Query: 1 TGATGAAGAAGTGGCGCAGAAGA 23  
|||  
Sbjct: 3011 ACTACTTCTTCACCGCGTCTTCT 2989

>miR5293 Score: 0.0 R03G\_16361

Query: 1 TGATGAAGAAGTGGCGCAGAAGA 23  
|||||  
Sbjct: 2846 ACTACTTCTTCACCGCGTCTTCT 2824  
>miR5293 Score: 0.0 R03G\_16539

Query: 1 TGATGAAGAAGTGGCGCAGAAGA 23  
|||||  
Sbjct: 2903 ACTACTTCTTCACCGCGTCTTCT 2881  
>miR5293 Score: 0.0 R03G\_13918

Query: 1 TGATGAAGAAGTGGCGCAGAAGA 23  
|||||  
Sbjct: 3011 ACTACTTCTTCACCGCGTCTTCT 2989  
>miR5293 Score: 0.0 R03G\_14347

Query: 1 TGATGAAGAAGTGGCGCAGAAGA 23  
|||||  
Sbjct: 2942 ACTACTTCTTCACCGCGTCTTCT 2920  
>miR5293 Score: 0.0 R03G\_12673

Query: 1 TGATGAAGAAGTGGCGCAGAAGA 23  
|||||  
Sbjct: 2147 ACTACTTCTTCACCGCGTCTTCT 2125  
>miR5293 Score: 0.0 R03G\_12677

Query: 1 TGATGAAGAAGTGGCGCAGAAGA 23  
|||||  
Sbjct: 2846 ACTACTTCTTCACCGCGTCTTCT 2824  
>miR5293 Score: 0.0 R03G\_12527

Query: 1 TGATGAAGAAGTGGCGCAGAAGA 23  
|||||  
Sbjct: 3011 ACTACTTCTTCACCGCGTCTTCT 2989  
>miR5293 Score: 0.0 R03G\_12532

Query: 1 TGATGAAGAAGTGGCGCAGAAGA 23  
|||||  
Sbjct: 2852 ACTACTTCTTCACCGCGTCTTCT 2830  
>miR5293 Score: 0.0 R03G\_12538

Query: 1 TGATGAAGAAGTGGCGCAGAAGA 23  
|||||  
Sbjct: 2903 ACTACTTCTTCACCGCGTCTTCT 2881  
>miR5293 Score: 0.0 R03G\_10804

Query: 1 TGATGAAGAAGTGGCGCAGAAGA 23  
|||||  
Sbjct: 2852 ACTACTTCTTCACCGCGTCTTCT 2830  
>miR5293 Score: 0.0 R03G\_09493

Query: 1 TGATGAAGAAGTGGCGCAGAAGA 23  
|||||  
Sbjct: 1670 ACTACTTCTTCACCGCGTCTTCT 1648  
>miR5293 Score: 0.0 R03G\_09547

Query: 1 TGATGAAGAAGTGGCGCAGAAGA 23



|||||  
Sbjct: 2846 ACTACTTCTTCACCGCGTCTTCT 2824  
>miR5293 Score: 1.5 R03G\_08830  
Query: 1 TGATGAAGAAGTGGCGCAGAAGA 23  
|||||:  
Sbjct: 125 ACTACTTCTTCACTACGTCTTCT 103  
>miR5293 Score: 0.0 R03G\_07311  
Query: 1 TGATGAAGAAGTGGCGCAGAAGA 23  
|||||  
Sbjct: 2852 ACTACTTCTTCACCGCGTCTTCT 2830  
>miR5293 Score: 0.0 R03G\_06425  
Query: 1 TGATGAAGAAGTGGCGCAGAAGA 23  
|||||  
Sbjct: 2846 ACTACTTCTTCACCGCGTCTTCT 2824  
>miR5293 Score: 0.0 R03G\_04933  
Query: 1 TGATGAAGAAGTGGCGCAGAAGA 23  
|||||  
Sbjct: 2846 ACTACTTCTTCACCGCGTCTTCT 2824  
>miR5293 Score: 0.0 R03G\_05330  
Query: 1 TGATGAAGAAGTGGCGCAGAAGA 23  
|||||  
Sbjct: 2846 ACTACTTCTTCACCGCGTCTTCT 2824  
>miR5293 Score: 0.0 R03G\_05344  
Query: 1 TGATGAAGAAGTGGCGCAGAAGA 23  
|||||  
Sbjct: 2672 ACTACTTCTTCACCGCGTCTTCT 2650  
>miR5293 Score: 0.0 R03G\_05515  
Query: 1 TGATGAAGAAGTGGCGCAGAAGA 23  
|||||  
Sbjct: 1841 ACTACTTCTTCACCGCGTCTTCT 1819  
>miR5293 Score: 0.0 R03G\_02704  
Query: 1 TGATGAAGAAGTGGCGCAGAAGA 23  
|||||  
Sbjct: 2846 ACTACTTCTTCACCGCGTCTTCT 2824  
>miR5293 Score: 0.0 R03G\_02821  
Query: 1 TGATGAAGAAGTGGCGCAGAAGA 23  
|||||  
Sbjct: 3011 ACTACTTCTTCACCGCGTCTTCT 2989  
>miR5293 Score: 0.0 R03G\_03619  
Query: 1 TGATGAAGAAGTGGCGCAGAAGA 23  
|||||  
Sbjct: 2738 ACTACTTCTTCACCGCGTCTTCT 2716  
>miR5293 Score: 0.0 R03G\_03769  
Query: 1 TGATGAAGAAGTGGCGCAGAAGA 23  
|||||

Sbjct: 776 ACTACTTCTTCACCGCGTCTTCT 754  
>miR5293 Score: 0.0 R03G\_03778  
Query: 1 TGATGAAGAAGTGGCGCAGAAGA 23  
|||||  
Sbjct: 2804 ACTACTTCTTCACCGCGTCTTCT 2782  
>miR5293 Score: 0.0 R03G\_04126  
Query: 1 TGATGAAGAAGTGGCGCAGAAGA 23  
|||||  
Sbjct: 3005 ACTACTTCTTCACCGCGTCTTCT 2983  
>miR5293 Score: 0.0 R03G\_00241  
Query: 1 TGATGAAGAAGTGGCGCAGAAGA 23  
|||||  
Sbjct: 1136 ACTACTTCTTCACCGCGTCTTCT 1114  
>miR5293 Score: 0.0 R03G\_00296  
Query: 1 TGATGAAGAAGTGGCGCAGAAGA 23  
|||||  
Sbjct: 1136 ACTACTTCTTCACCGCGTCTTCT 1114  
>miR5293 Score: 0.0 R03G\_01614  
Query: 1 TGATGAAGAAGTGGCGCAGAAGA 23  
|||||  
Sbjct: 2852 ACTACTTCTTCACCGCGTCTTCT 2830  
>miR5293 Score: 0.0 R03G\_01936  
Query: 1 TGATGAAGAAGTGGCGCAGAAGA 23  
|||||  
Sbjct: 2852 ACTACTTCTTCACCGCGTCTTCT 2830  
>miR5293 Score: 0.0 R03G\_01964  
Query: 1 TGATGAAGAAGTGGCGCAGAAGA 23  
|||||  
Sbjct: 1322 ACTACTTCTTCACCGCGTCTTCT 1300  
>miR5293 Score: 0.0 R03G\_17422  
Query: 1 TGATGAAGAAGTGGCGCAGAAGA 23  
|||||  
Sbjct: 2147 ACTACTTCTTCACCGCGTCTTCT 2125  
>miR917 Score: 2.2 R03G\_03747  
Query: 1 TCGTTCAGTCTATGTTCTGAAG 22  
|||:|||||||:|\*|||:  
Sbjct: 743 AGCGAGTGACGATGTAATCTTT 722  
>miR1167 Score: 2.5 R03G\_15066  
Query: 1 TGGGCTGTGGATGACTTGAAAC 22  
||:||||||\*||||||\*||  
Sbjct: 565 ACTTGACACCTCCTGAACTATG 544  
>miR1513a-5p Score: 1.2 R03G\_17260  
Query: 1 TGAACAAAGCCATGGACTTGC 21  
::|||||||:|||||||  
Sbjct: 1555 GTTTGTTCGGTATCTGAACG 1535

>miR1513a-5p Score: 1.8 R03G\_17268  
Query: 1 TGAACAAAGCCATGGACTTGC 21  
::|||||\*|||||  
Sbjct: 271 GTTTGTTCGGTAGCTGAACG 251

>miR1513a-5p Score: 1.2 R03G\_17226  
Query: 1 TGAACAAAGCCATGGACTTGC 21  
:|||||\*|||||  
Sbjct: 1690 GCTTGTTCGGTAACTGAACG 1670

>miR1513a-5p Score: 0.0 R03G\_16812  
Query: 1 TGAACAAAGCCATGGACTTGC 21  
|||||  
Sbjct: 1687 ACTTGTTCGGTACCTGAACG 1667

>miR1513a-5p Score: 1.2 R03G\_16815  
Query: 1 TGAACAAAGCCATGGACTTGC 21  
:|||||\*|||||  
Sbjct: 1690 GCTTGTTCGGTAACTGAACG 1670

>miR1513a-5p Score: 0.0 R03G\_16392  
Query: 1 TGAACAAAGCCATGGACTTGC 21  
|||||  
Sbjct: 670 ACTTGTTCGGTACCTGAACG 650

>miR1513a-5p Score: 0.0 R03G\_15270  
Query: 1 TGAACAAAGCCATGGACTTGC 21  
|||||  
Sbjct: 736 ACTTGTTCGGTACCTGAACG 716

>miR1513a-5p Score: 0.0 R03G\_14791  
Query: 1 TGAACAAAGCCATGGACTTGC 21  
|||||  
Sbjct: 1687 ACTTGTTCGGTACCTGAACG 1667

>miR1513a-5p Score: 1.8 R03G\_14793  
Query: 1 TGAACAAAGCCATGGACTTGC 21  
::|||||\*|||||  
Sbjct: 1690 GTTTGTTCGGTAGCTGAACG 1670

>miR1513a-5p Score: 1.2 R03G\_14795  
Query: 1 TGAACAAAGCCATGGACTTGC 21  
:|||||\*|||||  
Sbjct: 1690 GCTTGTTCGGTAACTGAACG 1670

>miR1513a-5p Score: 0.0 R03G\_14798  
Query: 1 TGAACAAAGCCATGGACTTGC 21  
|||||  
Sbjct: 1687 ACTTGTTCGGTACCTGAACG 1667

>miR1513a-5p Score: 1.8 R03G\_14800  
Query: 1 TGAACAAAGCCATGGACTTGC 21  
::|||||\*|||||  
Sbjct: 1690 GTTTGTTCGGTAGCTGAACG 1670

>miR1513a-5p Score: 1.2 R03G\_13288



||\*|||||||:|\*|||||||  
Sbjct: 632 AGCCCTGAAACTCGACCGGT 613  
>miR2867-3p Score: 2.0 R03G\_16715  
Query: 1 TCAGGACTTTGGGATGGCCA 20  
||\*|||||||\*|||||||  
Sbjct: 275 AGCCCTGAAACCCGACCGGT 256  
>miR2867-3p Score: 2.0 R03G\_16725  
Query: 1 TCAGGACTTTGGGATGGCCA 20  
||\*|||||||\*|||||||  
Sbjct: 557 AGACCTGAAACACTACCGGT 538  
>miR2867-3p Score: 2.0 R03G\_16742  
Query: 1 TCAGGACTTTGGGATGGCCA 20  
||\*|||||||\*|||||||  
Sbjct: 815 AGACCTGAAACACTACCGGT 796  
>miR2867-3p Score: 2.0 R03G\_16706  
Query: 1 TCAGGACTTTGGGATGGCCA 20  
||\*|||||||\*|||||||  
Sbjct: 539 AGACCTGAAACACTACCGGT 520  
>miR2867-3p Score: 2.0 R03G\_16372  
Query: 1 TCAGGACTTTGGGATGGCCA 20  
||\*|||||||\*|||||||  
Sbjct: 815 AGACCTGAAACACTACCGGT 796  
>miR2867-3p Score: 2.0 R03G\_16377  
Query: 1 TCAGGACTTTGGGATGGCCA 20  
|||:|||||:|\*|||||||  
Sbjct: 140 AGTCTTGAAACTCGACCGGT 121  
>miR2867-3p Score: 2.0 R03G\_16420  
Query: 1 TCAGGACTTTGGGATGGCCA 20  
||\*|||||||\*|||||||  
Sbjct: 566 AGACCTGAAACGCTACCGGT 547  
>miR2867-3p Score: 2.2 R03G\_16533  
Query: 1 TCAGGACTTTGGGATGGCCA 20  
:|:|:|:|:|:|:|\*|  
Sbjct: 1411 GGTCTGGAACCCTACCACT 1392  
>miR2867-3p Score: 2.0 R03G\_16548  
Query: 1 TCAGGACTTTGGGATGGCCA 20  
|||||||:|\*|||\*|  
Sbjct: 470 AGTCCTGAAACTCGACCGTT 451  
>miR2867-3p Score: 1.5 R03G\_16118  
Query: 1 TCAGGACTTTGGGATGGCCA 20  
|||||||:|\*|||||||  
Sbjct: 83 AGTCCTGAAACTCGACCGGT 64  
>miR2867-3p Score: 2.0 R03G\_16123  
Query: 1 TCAGGACTTTGGGATGGCCA 20  
||\*|||||||\*|||||||

Sbjct: 815 AGACCTGAAACTACCGGT 796  
>miR2867-3p Score: 2.5 R03G\_15672  
Query: 1 TCAGGACTTTGGGATGGCCA 20  
|||||||:\*\*|

Sbjct: 632 AGTCCTGAAACTCGTCCGGT 613  
>miR2867-3p Score: 1.5 R03G\_15873  
Query: 1 TCAGGACTTTGGGATGGCCA 20  
|||||||:|\*

Sbjct: 815 AGTCCTGAAACTCGACCGGT 796  
>miR2867-3p Score: 2.0 R03G\_15271  
Query: 1 TCAGGACTTTGGGATGGCCA 20  
||\*|||||\*|||||

Sbjct: 815 AGACCTGAAACTACCGGT 796  
>miR2867-3p Score: 2.0 R03G\_15282  
Query: 1 TCAGGACTTTGGGATGGCCA 20  
||\*|||||\*|||||

Sbjct: 539 AGACCTGAAACGCTACCGGT 520  
>miR2867-3p Score: 2.5 R03G\_14987  
Query: 1 TCAGGACTTTGGGATGGCCA 20  
|||||||:\*\*|

Sbjct: 479 AGTCCTGAAACTCGTCCGGT 460  
>miR2867-3p Score: 1.5 R03G\_15154  
Query: 1 TCAGGACTTTGGGATGGCCA 20  
|||||||:|\*

Sbjct: 815 AGTCCTGAAACTCGACCGGT 796  
>miR2867-3p Score: 0.0 R03G\_14361  
Query: 1 TCAGGACTTTGGGATGGCCA 20  
|||||||

Sbjct: 815 AGTCCTGAAACCCTACCGGT 796  
>miR2867-3p Score: 0.0 R03G\_14568  
Query: 1 TCAGGACTTTGGGATGGCCA 20  
|||||||

Sbjct: 815 AGTCCTGAAACCCTACCGGT 796  
>miR2867-3p Score: 2.5 R03G\_14620  
Query: 1 TCAGGACTTTGGGATGGCCA 20  
|||||||:\*\*|

Sbjct: 260 AGTCCTGAAACTCGTCCGGT 241  
>miR2867-3p Score: 2.5 R03G\_14772  
Query: 1 TCAGGACTTTGGGATGGCCA 20  
|||||||:\*\*|

Sbjct: 710 AGTCCTGAAACTCGTCCGGT 691  
>miR2867-3p Score: 2.5 R03G\_14050  
Query: 1 TCAGGACTTTGGGATGGC-CA 20  
|||||:|||||\*\*\*|

Sbjct: 1504 AGTCCTGGAACCCTACAACGT 1484

>miR2867-3p Score: 1.5 R03G\_13447  
Query: 1 TCAGGACTTTGGGATGGCCA 20  
|||||||:|\*|||  
Sbjct: 815 AGTCCTGAAACTCGACCGGT 796

>miR2867-3p Score: 1.5 R03G\_13706  
Query: 1 TCAGGACTTTGGGATGGCCA 20  
|||||||:|\*|||  
Sbjct: 773 AGTCCTGAAACTCGACCGGT 754

>miR2867-3p Score: 2.0 R03G\_13714  
Query: 1 TCAGGACTTTGGGATGGCCA 20  
||\*|||||\*|||  
Sbjct: 815 AGACCTGAAACTACCGGT 796

>miR2867-3p Score: 2.5 R03G\_13852  
Query: 1 TCAGGACTTTGGGATGGCCA 20  
||\*|||||\*|||:|||  
Sbjct: 566 AGACCTGAAACTACTGGT 547

>miR2867-3p Score: 2.0 R03G\_12663  
Query: 1 TCAGGACTTTGGGATGGCCA 20  
||\*|||||\*|||  
Sbjct: 650 AGACCTGAAACTACCGGT 631

>miR2867-3p Score: 2.5 R03G\_12670  
Query: 1 TCAGGACTTTGGGATGGCCA 20  
|||||||:|\*\*|||  
Sbjct: 632 AGTCCTGAAACTCGTCCGGT 613

>miR2867-3p Score: 1.5 R03G\_13276  
Query: 1 TCAGGACTTTGGGATGGCCA 20  
|||||||:|\*|||  
Sbjct: 197 AGTCCTGAAACTCGACCGGT 178

>miR2867-3p Score: 0.0 R03G\_11966  
Query: 1 TCAGGACTTTGGGATGGCCA 20  
|||||||  
Sbjct: 815 AGTCCTGAAACCCTACCGGT 796

>miR2867-3p Score: 1.5 R03G\_12013  
Query: 1 TCAGGACTTTGGGATGGCCA 20  
|||||||:|\*|||  
Sbjct: 140 AGTCCTGAAACTCGACCGGT 121

>miR2867-3p Score: 2.5 R03G\_12082  
Query: 1 TCAGGACTTTGGGATGGCCA 20  
|||||||:|\*\*|||  
Sbjct: 710 AGTCCTGAAACTCGTCCGGT 691

>miR2867-3p Score: 1.5 R03G\_12174  
Query: 1 TCAGGACTTTGGGATGGCCA 20  
|||||||:|\*|||  
Sbjct: 140 AGTCCTGAAACTCGACCGGT 121

>miR2867-3p Score: 2.5 R03G\_12186

Query: 1 TCAGGACTTTGGGATGGCCA 20  
||\*|||||||:|\*|||||||  
Sbjct: 824 AGACCTGAAACTCGACCGGT 805  
>miR2867-3p Score: 2.5 R03G\_12196  
Query: 1 TCAGGACTTTGGGATGGCCA 20  
||\*|||||||:|\*|||||||  
Sbjct: 746 AGACCTGAAACTCGACCGGT 727  
>miR2867-3p Score: 2.5 R03G\_12525  
Query: 1 TCAGGACTTTGGGATGGCCA 20  
||\*|||||||:|\*|||||||  
Sbjct: 746 AGCCCTGAAACTCGACCGGT 727  
>miR2867-3p Score: 1.5 R03G\_12526  
Query: 1 TCAGGACTTTGGGATGGCCA 20  
|||||||:|\*|||||||  
Sbjct: 815 AGTCCTGAAACTCGACCGGT 796  
>miR2867-3p Score: 1.5 R03G\_11244  
Query: 1 TCAGGACTTTGGGATGGCCA 20  
|||||||:|\*|||||||  
Sbjct: 815 AGTCCTGAAACTCGACCGGT 796  
>miR2867-3p Score: 1.5 R03G\_11263  
Query: 1 TCAGGACTTTGGGATGGCCA 20  
|||||||:|\*|||||||  
Sbjct: 140 AGTCCTGAAACTCGACCGGT 121  
>miR2867-3p Score: 2.5 R03G\_11273  
Query: 1 TCAGGACTTTGGGATGGCCA 20  
||\*|||||||:|\*|||||||  
Sbjct: 155 AGCCCTGAAACTCGACCGGT 136  
>miR2867-3p Score: 2.5 R03G\_11405  
Query: 1 TCAGGACTTTGGGATGGCCA 20  
|||||||:|\*\*|||||||  
Sbjct: 632 AGTCCTGAAACTCGTCCGGT 613  
>miR2867-3p Score: 1.5 R03G\_11528  
Query: 1 TCAGGACTTTGGGATGGCCA 20  
|||||||:|\*|||||||  
Sbjct: 140 AGTCCTGAAACTCGACCGGT 121  
>miR2867-3p Score: 2.5 R03G\_11534  
Query: 1 TCAGGACTTTGGGATGGCCA 20  
||||\*|||||:|\*|||||||  
Sbjct: 815 AGTCCCGAAACTCGACCGGT 796  
>miR2867-3p Score: 2.0 R03G\_11781  
Query: 1 TCAGGACTTTGGGATGGCCA 20  
||\*|||||||\*|||||||  
Sbjct: 710 AGACCTGAAACACTACCGGT 691  
>miR2867-3p Score: 1.5 R03G\_11948  
Query: 1 TCAGGACTTTGGGATGGCCA 20



|||||\*|||||  
Sbjct: 815 AGTCCTGAAACTCGACCGGT 796  
>miR2867-3p Score: 1.5 R03G\_10528  
Query: 1 TCAGGACTTTGGGATGGCCA 20  
|||||\*|||||  
Sbjct: 140 AGTCCTGAAACTCGACCGGT 121  
>miR2867-3p Score: 1.5 R03G\_10537  
Query: 1 TCAGGACTTTGGGATGGCCA 20  
|||||\*|||||  
Sbjct: 638 AGTCCTGAAACTCGACCGGT 619  
>miR2867-3p Score: 1.5 R03G\_10720  
Query: 1 TCAGGACTTTGGGATGGCCA 20  
|||||\*|||||  
Sbjct: 815 AGTCCTGAAACTCGACCGGT 796  
>miR2867-3p Score: 0.5 R03G\_10729  
Query: 1 TCAGGACTTTGGGATGGCCA 20  
|||||\*|||||  
Sbjct: 815 AGTCCTGAAACCCTATCGGT 796  
>miR2867-3p Score: 1.5 R03G\_10742  
Query: 1 TCAGGACTTTGGGATGGCCA 20  
|||||\*|||||  
Sbjct: 140 AGTCCTGAAACTCGACCGGT 121  
>miR2867-3p Score: 1.0 R03G\_10773  
Query: 1 TCAGGACTTTGGGATGGCCA 20  
|||||\*|||||  
Sbjct: 815 AGTCCCGAAACCCTACCGGT 796  
>miR2867-3p Score: 1.0 R03G\_10780  
Query: 1 TCAGGACTTTGGGATGGCCA 20  
|||||\*|||||  
Sbjct: 815 AGTCCCGAAACCCTACCGGT 796  
>miR2867-3p Score: 2.0 R03G\_09193  
Query: 1 TCAGGACTTTGGGATGGCCA 20  
||\*|||||\*|||||  
Sbjct: 539 AGACCTGAAACACTACCGGT 520  
>miR2867-3p Score: 1.0 R03G\_09194  
Query: 1 TCAGGACTTTGGGATGGCCA 20  
|||||\*|||||  
Sbjct: 815 AGTCCTGAAACCCTACAGGT 796  
>miR2867-3p Score: 1.5 R03G\_09199  
Query: 1 TCAGGACTTTGGGATGGCCA 20  
|||||\*|||||  
Sbjct: 815 AGTCCTGAAACTCGACCGGT 796  
>miR2867-3p Score: 1.2 R03G\_09542  
Query: 1 TCAGGACTTTGGGATGGCCA 20  
:||||\*|||||

Sbjct: 815 GGTCCCGAAACCCTACCGGT 796  
>miR2867-3p Score: 1.5 R03G\_09924  
Query: 1 TCAGGACTTTGGGATGGCCA 20  
|||||||:|\*|||||

Sbjct: 815 AGTCCTGAAACTCGACCGGT 796  
>miR2867-3p Score: 2.5 R03G\_09944  
Query: 1 TCAGGACTTTGGGATGGCCA 20  
|||||||:\*\*||||||

Sbjct: 632 AGTCCTGAAACTCGTCCGGT 613  
>miR2867-3p Score: 1.0 R03G\_09945  
Query: 1 TCAGGACTTTGGGATGGCCA 20  
|||||||\*|||

Sbjct: 539 AGTCCTGAAACCCTACAGGT 520  
>miR2867-3p Score: 2.5 R03G\_09955  
Query: 1 TCAGGACTTTGGGATGGCCA 20  
||\*||||||:|\*|||||

Sbjct: 509 AGCCCTGAAACTCGACCGGT 490  
>miR2867-3p Score: 0.0 R03G\_09967  
Query: 1 TCAGGACTTTGGGATGGCCA 20  
|||||||

Sbjct: 815 AGTCCTGAAACCCTACCGGT 796  
>miR2867-3p Score: 1.5 R03G\_10044  
Query: 1 TCAGGACTTTGGGATGGCCA 20  
|||||||:|\*|||||

Sbjct: 815 AGTCCTGAAACTCGACCGGT 796  
>miR2867-3p Score: 2.5 R03G\_10224  
Query: 1 TCAGGACTTTGGGATGGCCA 20  
|||||||:\*\*||||||

Sbjct: 632 AGTCCTGAAACTCGTCCGGT 613  
>miR2867-3p Score: 2.5 R03G\_10226  
Query: 1 TCAGGACTTTGGGATGGCCA 20  
|||||||:\*\*||||||

Sbjct: 632 AGTCCTGAAACTCGTCCGGT 613  
>miR2867-3p Score: 1.5 R03G\_07994  
Query: 1 TCAGGACTTTGGGATGGCCA 20  
|||||||:|\*|||||

Sbjct: 815 AGTCCTGAAACTCGACCGGT 796  
>miR2867-3p Score: 2.5 R03G\_08649  
Query: 1 TCAGGACTTTGGGATGGCCA 20  
|||||||:\*\*||||||

Sbjct: 577 AGTCCTGAAACTCGTCCGGT 558  
>miR2867-3p Score: 1.5 R03G\_08835  
Query: 1 TCAGGACTTTGGGATGGCCA 20  
|||||||:|\*|||||

Sbjct: 125 AGTCCTGAAACTCGACCGGT 106

>miR2867-3p Score: 2.5 R03G\_08848  
Query: 1 TCAGGACTTTGGGATGGCCA 20  
||||\*|||||:|\*|||||  
Sbjct: 125 AGTCCCGAAACTCGACCGGT 106

>miR2867-3p Score: 2.5 R03G\_07024  
Query: 1 TCAGGACTTTGGGATGGCCA 20  
||\*|||||||:|\*|||||  
Sbjct: 824 AGCCCTGAAACTCGACCGGT 805

>miR2867-3p Score: 1.5 R03G\_07119  
Query: 1 TCAGGACTTTGGGATGGCCA 20  
|||||||:|\*|||||  
Sbjct: 140 AGTCCTGAAACTCGACCGGT 121

>miR2867-3p Score: 2.5 R03G\_07121  
Query: 1 TCAGGACTTTGGGATGGCCA 20  
||\*|||||||:|\*|||||  
Sbjct: 824 AGCCCTGAAACTCGACCGGT 805

>miR2867-3p Score: 2.0 R03G\_07137  
Query: 1 TCAGGACTTTGGGATGGCCA 20  
||\*|||||||\*|||||||  
Sbjct: 815 AGACCTGAAACTACCGGT 796

>miR2867-3p Score: 1.5 R03G\_07295  
Query: 1 TCAGGACTTTGGGATGGCCA 20  
|||||||:|\*|||||  
Sbjct: 647 AGTCCTGAAACTCGACCGGT 628

>miR2867-3p Score: 2.5 R03G\_07302  
Query: 1 TCAGGACTTTGGGATGGCCA 20  
|||||||:|\*\*|||||  
Sbjct: 632 AGTCCTGAAACTCGTCCGGT 613

>miR2867-3p Score: 2.5 R03G\_07673  
Query: 1 TCAGGACTTTGGGATGGCCA 20  
||\*|||||||\*||:|||||  
Sbjct: 815 AGCCCTGAAACTGCCGGT 796

>miR2867-3p Score: 1.5 R03G\_07683  
Query: 1 TCAGGACTTTGGGATGGCCA 20  
|||||||:|\*|||||  
Sbjct: 815 AGTCCTGAAACTCGACCGGT 796

>miR2867-3p Score: 2.5 R03G\_07689  
Query: 1 TCAGGACTTTGGGATGGCCA 20  
|||||||:|\*\*|||||  
Sbjct: 632 AGTCCTGAAACTCGTCCGGT 613

>miR2867-3p Score: 2.0 R03G\_07702  
Query: 1 TCAGGACTTTGGGATGGCCA 20  
||\*|||||||\*|||||||  
Sbjct: 566 AGACCTGAAACGCTACCGGT 547

>miR2867-3p Score: 2.0 R03G\_07705

Query: 1 TCAGGACTTTGGGATGGCCA 20  
||\*|||||||\*|||||||  
Sbjct: 815 AGACCTGAAACGCTACCGGT 796  
>miR2867-3p Score: 2.5 R03G\_07739  
Query: 1 TCAGGACTTTGGGATGGCCA 20  
||\*|||||||\*||||:|  
Sbjct: 566 AGACCTGAAACACTACTGGT 547  
>miR2867-3p Score: 0.0 R03G\_07860  
Query: 1 TCAGGACTTTGGGATGGCCA 20  
|||||||  
Sbjct: 815 AGTCCTGAAACCCTACCGGT 796  
>miR2867-3p Score: 2.0 R03G\_07867  
Query: 1 TCAGGACTTTGGGATGGCCA 20  
||\*|||||||\*|||||||  
Sbjct: 566 AGACCTGAAACACTACCGGT 547  
>miR2867-3p Score: 2.0 R03G\_05640  
Query: 1 TCAGGACTTTGGGATGGCCA 20  
||\*|||||||\*|||||||  
Sbjct: 710 AGACCTGAAACACTACCGGT 691  
>miR2867-3p Score: 1.5 R03G\_05916  
Query: 1 TCAGGACTTTGGGATGGCCA 20  
|||||||:|\*|||||  
Sbjct: 815 AGTCCTGAAACTCGACCGGT 796  
>miR2867-3p Score: 0.0 R03G\_05921  
Query: 1 TCAGGACTTTGGGATGGCCA 20  
|||||||  
Sbjct: 815 AGTCCTGAAACCCTACCGGT 796  
>miR2867-3p Score: 2.0 R03G\_05950  
Query: 1 TCAGGACTTTGGGATGGCCA 20  
||\*|||||||\*|||||  
Sbjct: 293 AGCCCTGAAACCCGACCGGT 274  
>miR2867-3p Score: 0.0 R03G\_05953  
Query: 1 TCAGGACTTTGGGATGGCCA 20  
|||||||  
Sbjct: 815 AGTCCTGAAACCCTACCGGT 796  
>miR2867-3p Score: 0.0 R03G\_05959  
Query: 1 TCAGGACTTTGGGATGGCCA 20  
|||||||  
Sbjct: 815 AGTCCTGAAACCCTACCGGT 796  
>miR2867-3p Score: 2.0 R03G\_06717  
Query: 1 TCAGGACTTTGGGATGGCCA 20  
||\*|||||||\*|||||||  
Sbjct: 815 AGACCTGAAACACTACCGGT 796  
>miR2867-3p Score: 2.5 R03G\_06721  
Query: 1 TCAGGACTTTGGGATGGCCA 20

|||||||:\*\*|  
Sbjct: 629 AGTCCTGAAACTCGTCCGGT 610  
>miR2867-3p Score: 2.5 R03G\_04654  
Query: 1 TCAGGACTTTGGGATGGCCA 20  
|||||||:\*\*|  
Sbjct: 632 AGTCCTGAAACTCGTCCGGT 613  
>miR2867-3p Score: 2.0 R03G\_04674  
Query: 1 TCAGGACTTTGGGATGGCCA 20  
||\*||||||\*|||||||  
Sbjct: 566 AGACCTGAAACACTACCGGT 547  
>miR2867-3p Score: 2.5 R03G\_04695  
Query: 1 TCAGGACTTTGGGATGGCCA 20  
||\*|:|||||\*|||||||  
Sbjct: 605 AGACTTGAAACACTACCGGT 586  
>miR2867-3p Score: 2.5 R03G\_04786  
Query: 1 TCAGGACTTTGGGATGGCCA 20  
||\*|||||||:|\*|||||||  
Sbjct: 392 AGCCCTGAAACTCGACCGGT 373  
>miR2867-3p Score: 0.0 R03G\_05267  
Query: 1 TCAGGACTTTGGGATGGCCA 20  
|||||||  
Sbjct: 815 AGTCCTGAAACCCTACCGGT 796  
>miR2867-3p Score: 2.0 R03G\_05268  
Query: 1 TCAGGACTTTGGGATGGCCA 20  
||\*|||||||\*|||||||  
Sbjct: 815 AGACCTGAAACACTACCGGT 796  
>miR2867-3p Score: 2.5 R03G\_02700  
Query: 1 TCAGGACTTTGGGATGGCCA 20  
||\*|||||||:|\*|||||||  
Sbjct: 509 AGCCCTGAAACTCGACCGGT 490  
>miR2867-3p Score: 2.0 R03G\_02824  
Query: 1 TCAGGACTTTGGGATGGCCA 20  
||\*|||||||\*|||||||  
Sbjct: 815 AGACCTGAAACACTACCGGT 796  
>miR2867-3p Score: 1.5 R03G\_03558  
Query: 1 TCAGGACTTTGGGATGGCCA 20  
|||||||:|\*|||||||  
Sbjct: 815 AGTCCTGAAACTCGACCGGT 796  
>miR2867-3p Score: 2.5 R03G\_03570  
Query: 1 TCAGGACTTTGGGATGGCCA 20  
||\*|||||||:|\*|||||||  
Sbjct: 509 AGCCCTGAAACTCGACCGGT 490  
>miR2867-3p Score: 2.0 R03G\_03605  
Query: 1 TCAGGACTTTGGGATGGCCA 20  
||\*|||||||\*|||||||

Sbjct: 1277 AGCCCTGAAACCCGACCGGT 1258  
>miR2867-3p Score: 1.5 R03G\_03617  
Query: 1 TCAGGACTTTGGGATGGCCA 20  
|||||||:|\*|

Sbjct: 815 AGTCCTGAAACTCGACCGGT 796  
>miR2867-3p Score: 2.5 R03G\_03785  
Query: 1 TCAGGACTTTGGGATGGCCA 20  
|||||||:|\*\*|

Sbjct: 437 AGTCCTGAAACTCGTCCGGT 418  
>miR2867-3p Score: 2.5 R03G\_03797  
Query: 1 TCAGGACTTTGGGATGGCCA 20  
|||||||:|\*\*|

Sbjct: 320 AGTCCTGAAACTCGTCCGGT 301  
>miR2867-3p Score: 1.5 R03G\_03987  
Query: 1 TCAGGACTTTGGGATGGCCA 20  
|||||||:|\*|

Sbjct: 815 AGTCCTGAAACTCGACCGGT 796  
>miR2867-3p Score: 2.5 R03G\_04200  
Query: 1 TCAGGACTTTGGGATGGCCA 20  
|||||||:|\*\*|

Sbjct: 632 AGTCCTGAAACTCGTCCGGT 613  
>miR2867-3p Score: 0.5 R03G\_04207  
Query: 1 TCAGGACTTTGGGATGGCCA 20  
||||:||||

Sbjct: 815 AGTCTTGAAACCCTACCGGT 796  
>miR2867-3p Score: 1.0 R03G\_04210  
Query: 1 TCAGGACTTTGGGATGGCCA 20  
||||\*||||

Sbjct: 815 AGTCCCGAAACCCTACCGGT 796  
>miR2867-3p Score: 2.5 R03G\_00247  
Query: 1 TCAGGACTTTGGGATGGCCA 20  
|||||||:|\*\*|

Sbjct: 632 AGTCCTGAAACTCGTCCGGT 613  
>miR2867-3p Score: 0.0 R03G\_00256  
Query: 1 TCAGGACTTTGGGATGGCCA 20  
|||||||

Sbjct: 815 AGTCCTGAAACCCTACCGGT 796  
>miR2867-3p Score: 2.0 R03G\_00677  
Query: 1 TCAGGACTTTGGGATGGCCA 20  
||\*|||||\*|

Sbjct: 377 AGCCCTGAAACCCGACCGGT 358  
>miR2867-3p Score: 2.5 R03G\_00690  
Query: 1 TCAGGACTTTGGGATGGCCA 20  
||\*|||||:|\*|

Sbjct: 764 AGCCCTGAAACTCGACCGGT 745

>miR2867-3p Score: 2.0 R03G\_00745  
Query: 1 TCAGGACTTTGGGATGGCCA 20  
||\*|||||||\*|||||||  
Sbjct: 536 AGACCTGAAACTACCGGT 517

>miR2867-3p Score: 1.5 R03G\_01194  
Query: 1 TCAGGACTTTGGGATGGCCA 20  
|||||||:|\*|||||  
Sbjct: 815 AGTCCTGAAACTCGACCGGT 796

>miR2867-3p Score: 1.5 R03G\_01313  
Query: 1 TCAGGACTTTGGGATGGCCA 20  
|||||||:|\*|||||  
Sbjct: 815 AGTCCTGAAACTCGACCGGT 796

>miR2867-3p Score: 2.0 R03G\_01328  
Query: 1 TCAGGACTTTGGGATGGCCA 20  
||\*|||||||\*|||||||  
Sbjct: 815 AGACCTGAAACTACCGGT 796

>miR2867-3p Score: 2.5 R03G\_01468  
Query: 1 TCAGGACTTTGGGATGGCCA 20  
\*||:|||||||:|:|\*||  
Sbjct: 469 CGTTCTGAAACCTTGCCCGT 450

>miR2867-3p Score: 2.0 R03G\_01588  
Query: 1 TCAGGACTTTGGGATGGCCA 20  
||\*|||||||\*|||||||  
Sbjct: 155 AGCCCTGAAACCCGACCGGT 136

>miR2867-3p Score: 1.5 R03G\_01735  
Query: 1 TCAGGACTTTGGGATGGCCA 20  
|||||||:|\*|||||  
Sbjct: 815 AGTCCTGAAACTCGACCGGT 796

>miR2867-3p Score: 2.5 R03G\_01925  
Query: 1 TCAGGACTTTGGGATGGCCA 20  
||\*|||||||:|\*|||||  
Sbjct: 824 AGCCCTGAAACTCGACCGGT 805

>miR2867-3p Score: 1.0 R03G\_01942  
Query: 1 TCAGGACTTTGGGATGGCCA 20  
|||||||\*|||  
Sbjct: 812 AGTCCTGAAACCCTACAGGT 793

>miR2867-3p Score: 1.5 R03G\_01950  
Query: 1 TCAGGACTTTGGGATGGCCA 20  
|||||||:|\*|||||  
Sbjct: 815 AGTCCTGAAACTCGACCGGT 796

>miR2867-3p Score: 1.5 R03G\_01951  
Query: 1 TCAGGACTTTGGGATGGCCA 20  
|||||||:|\*|||||  
Sbjct: 815 AGTCCTGAAACTCGACCGGT 796

>miR2867-3p Score: 2.0 R03G\_01962

Query: 1 TCAGGACTTTGGGATGGCCA 20  
||\*|||||||\*|||||||  
Sbjct: 566 AGACCTGAAACACTACCGGT 547  
>miR2867-3p Score: 0.0 R03G\_17449  
Query: 1 TCAGGACTTTGGGATGGCCA 20  
|||||||  
Sbjct: 815 AGTCCTGAAACCCTACCGGT 796  
>miR2867-3p Score: 2.5 R03G\_17436  
Query: 1 TCAGGACTTTGGGATGGCCA 20  
|||||||:|\*\*|||  
Sbjct: 632 AGTCCTGAAACTCGTCCGGT 613  
>miR2867-3p Score: 2.0 R03G\_17416  
Query: 1 TCAGGACTTTGGGATGGCCA 20  
||\*|||||||\*|||||||  
Sbjct: 815 AGACCTGAAACACTACCGGT 796  
>miR2867-3p Score: 1.5 R03G\_17409  
Query: 1 TCAGGACTTTGGGATGGCCA 20  
|||||||:|\*|||  
Sbjct: 815 AGTCCTGAAACTCGACCGGT 796  
>miR2867-3p Score: 2.0 R03G\_17406  
Query: 1 TCAGGACTTTGGGATGGCCA 20  
||\*|||||||\*|||||||  
Sbjct: 176 AGCCCTGAAACCCGACCGGT 157  
>miR2867-3p Score: 2.0 R03G\_17399  
Query: 1 TCAGGACTTTGGGATGGCCA 20  
||\*|||||||\*|||||||  
Sbjct: 815 AGACCTGAAACACTACCGGT 796  
>miR2867-3p Score: 2.0 R03G\_17387  
Query: 1 TCAGGACTTTGGGATGGCCA 20  
||\*|||||||\*|||||||  
Sbjct: 815 AGACCTGAAACACTACCGGT 796  
>miR2867-3p Score: 2.0 R03G\_17355  
Query: 1 TCAGGACTTTGGGATGGCCA 20  
||\*|||||||\*|||||||  
Sbjct: 650 AGACCTGAAACACTACCGGT 631  
>miR2867-3p Score: 2.0 R03G\_17291  
Query: 1 TCAGGACTTTGGGATGGCCA 20  
||\*|||||||\*|||||||  
Sbjct: 815 AGACCTGAAACACTACCGGT 796  
>miR2867-3p Score: 2.5 R03G\_17293  
Query: 1 TCAGGACTTTGGGATGGCCA 20  
|||||||:|\*\*|||  
Sbjct: 632 AGTCCTGAAACTCGTCCGGT 613  
>miR5554a-5p Score: 1.0 R03G\_17220  
Query: 1 TGTTGCAGATCTTGAACAATGTT 23



```
|||||*|||||
Sbjct: 131 ACAACGTCTAGAACTCGTTACAA 109
>miR5554a-5p Score: 0.0 R03G_16903
Query: 1 TGTTGCAGATCTTGAACAATGTT 23
|||||
Sbjct: 68 ACAACGTCTAGAACTTGTACAA 46
>miR5554a-5p Score: 0.0 R03G_14562
Query: 1 TGTTGCAGATCTTGAACAATGTT 23
|||||
Sbjct: 68 ACAACGTCTAGAACTTGTACAA 46
>miR5554a-5p Score: 2.5 R03G_12583
Query: 1 TGTTGCAGATCTTGAACAATGTT 23
|*|||||*|||||*||
Sbjct: 443 AAAACGTCTAAAACCTTGTTA-AA 422
>miR5554a-5p Score: 2.5 R03G_08022
Query: 1 TGTTGCAGATCTTGAACAATGTT 23
|||||*||||*||*||
Sbjct: 252 ACAACGTCTAGCACTT-TTAGAA 231
>miR5554a-5p Score: 0.0 R03G_07863
Query: 1 TGTTGCAGATCTTGAACAATGTT 23
|||||
Sbjct: 131 ACAACGTCTAGAACTTGTACAA 109
>miR7539 Score: 0.0 R03G_01611
Query: 1 TGAGAGAGAAGAGCTATGAGG 21
|||||
Sbjct: 323 ACTCTCTCTTCTCGATACTCC 303
>miR3703 Score: 1.0 R03G_16749
Query: 1 TAGATTCATCAGCCATTGCC 20
|*|||||
Sbjct: 1342 AACTAAGTAGTCGGTAACGG 1323
>miR3703 Score: 2.5 R03G_16457
Query: 1 TAGATTCATCAGCCATTGCC 20
||*|||||*|*|
Sbjct: 1162 ATCGAAGTAGTCGGTA-CTG 1144
>miR3703 Score: 1.0 R03G_15898
Query: 1 TAGATTCATCAGCCATTGCC 20
|*|||||
Sbjct: 1342 AACTAAGTAGTCGGTAACGG 1323
>miR3703 Score: 1.0 R03G_14550
Query: 1 TAGATTCATCAGCCATTGCC 20
|*|||||
Sbjct: 1342 AACTAAGTAGTCGGTAACGG 1323
>miR3703 Score: 1.0 R03G_13145
Query: 1 TAGATTCATCAGCCATTGCC 20
|*|||||
```

Sbjct: 1342 AACTAAGTAGTCGGTAACGG 1323  
>miR3703 Score: 1.0 R03G\_13273  
Query: 1 TAGATTCATCAGCCATTGCC 20  
|\*|||||||||||||||||  
Sbjct: 1342 AACTAAGTAGTCGGTAACGG 1323  
>miR3703 Score: 1.0 R03G\_11969  
Query: 1 TAGATTCATCAGCCATTGCC 20  
|\*|||||||||||||||||  
Sbjct: 1342 AACTAAGTAGTCGGTAACGG 1323  
>miR3703 Score: 2.2 R03G\_12602  
Query: 1 TAGATTCATCAGCCATTGCC 20  
:|||||||:|||||||\*\*\*  
Sbjct: 871 GTCTAAGTGGTCGGTAAAAT 852  
>miR3703 Score: 1.0 R03G\_11237  
Query: 1 TAGATTCATCAGCCATTGCC 20  
|\*|||||||||||||||||  
Sbjct: 1342 AACTAAGTAGTCGGTAACGG 1323  
>miR3703 Score: 1.0 R03G\_11409  
Query: 1 TAGATTCATCAGCCATTGCC 20  
|\*|||||||||||||||||  
Sbjct: 1342 AACTAAGTAGTCGGTAACGG 1323  
>miR3703 Score: 1.0 R03G\_11538  
Query: 1 TAGATTCATCAGCCATTGCC 20  
|\*|||||||||||||||||  
Sbjct: 1342 AACTAAGTAGTCGGTAACGG 1323  
>miR3703 Score: 2.5 R03G\_11638  
Query: 1 TAGATTCATCAGCCATTGCC 20  
||\*||\*||||||||||\*||  
Sbjct: 583 ATATATGTAGTCGGTAA-GG 565  
>miR3703 Score: 2.5 R03G\_11706  
Query: 1 TAGATTCATCAGCCATTGCC 20  
|\*||||||||||||||\*|\*  
Sbjct: 610 ACTTAAGTAGTCGGTAAAGA 591  
>miR3703 Score: 1.0 R03G\_09601  
Query: 1 TAGATTCATCAGCCATTGCC 20  
|\*|||||||||||||||||  
Sbjct: 1342 AACTAAGTAGTCGGTAACGG 1323  
>miR3703 Score: 1.0 R03G\_09930  
Query: 1 TAGATTCATCAGCCATTGCC 20  
|\*|||||||||||||||||  
Sbjct: 1342 AACTAAGTAGTCGGTAACGG 1323  
>miR3703 Score: 1.0 R03G\_10217  
Query: 1 TAGATTCATCAGCCATTGCC 20  
|\*|||||||||||||||||  
Sbjct: 1342 AACTAAGTAGTCGGTAACGG 1323

>miR3703 Score: 1.0 R03G\_07980  
Query: 1 TAGATTCATCAGCCATTGCC 20  
|\*||||||||||||||||||  
Sbjct: 730 AACTAAGTAGTCGGTAACGG 711

>miR3703 Score: 2.2 R03G\_08415  
Query: 1 TAGATTCATCAGCCATTGCC 20  
:|:|:|\*||||||||||||||  
Sbjct: 397 GTTTGAGAAGTCGGTAACGG 378

>miR3703 Score: 1.0 R03G\_06731  
Query: 1 TAGATTCATCAGCCATTGCC 20  
|\*||||||||||||||||||  
Sbjct: 1342 AACTAAGTAGTCGGTAACGG 1323

>miR3703 Score: 1.0 R03G\_07307  
Query: 1 TAGATTCATCAGCCATTGCC 20  
|\*||||||||||||||||||  
Sbjct: 1342 AACTAAGTAGTCGGTAACGG 1323

>miR3703 Score: 1.0 R03G\_07698  
Query: 1 TAGATTCATCAGCCATTGCC 20  
|\*||||||||||||||||||  
Sbjct: 1342 AACTAAGTAGTCGGTAACGG 1323

>miR3703 Score: 1.0 R03G\_07721  
Query: 1 TAGATTCATCAGCCATTGCC 20  
|\*||||||||||||||||||  
Sbjct: 1273 AACTAAGTAGTCGGTAACGG 1254

>miR3703 Score: 1.0 R03G\_07737  
Query: 1 TAGATTCATCAGCCATTGCC 20  
|\*||||||||||||||||||  
Sbjct: 703 AACTAAGTAGTCGGTAACGG 684

>miR3703 Score: 2.2 R03G\_07895  
Query: 1 TAGATTCATCAGCCATTGCC 20  
:|||||||:|||||||\*\*\*  
Sbjct: 892 GTCTAAGTGGTCGGTAAAAT 873

>miR3703 Score: 1.5 R03G\_05557  
Query: 1 TAGATTCATCAGCCATTGCC 20  
|||||||||||||||||:~\*~\*  
Sbjct: 988 ATCTAAGTAGTCGGTAG-GT 970

>miR3703 Score: 0.0 R03G\_04592  
Query: 1 TAGATTCATCAGCCATTGCC 20  
||||||||||||||||||  
Sbjct: 514 ATCTAAGTAGTCGGTAACGG 495

>miR3703 Score: 1.0 R03G\_04683  
Query: 1 TAGATTCATCAGCCATTGCC 20  
|\*||||||||||||||||||  
Sbjct: 1342 AACTAAGTAGTCGGTAACGG 1323

>miR3703 Score: 1.0 R03G\_04212



|||||  
Sbjct: 1955 ACGAATACTGAAACTAAACCCT 1934  
>miR5080 Score: 0.0 R03G\_17260  
Query: 1 AAAAGGATCATGACGGTACATG 22  
|||||  
Sbjct: 998 TTTTCCTAGTACTGCCATGTAC 977  
>miR5080 Score: 2.5 R03G\_17226  
Query: 1 AAAAGGATCATGACGGTACATG 22  
|||||\*|||||:||||\*|\*  
Sbjct: 1122 TTTTCCTAGCACTGCTATGAAA 1101  
>miR5080 Score: 0.0 R03G\_16733  
Query: 1 AAAAGGATCATGACGGTACATG 22  
|||||  
Sbjct: 1119 TTTTCCTAGTACTGCCATGTAC 1098  
>miR5080 Score: 0.0 R03G\_16812  
Query: 1 AAAAGGATCATGACGGTACATG 22  
|||||  
Sbjct: 1119 TTTTCCTAGTACTGCCATGTAC 1098  
>miR5080 Score: 2.5 R03G\_16815  
Query: 1 AAAAGGATCATGACGGTACATG 22  
|||||\*|||||:||||\*|\*  
Sbjct: 1122 TTTTCCTAGCACTGCTATGAAA 1101  
>miR5080 Score: 2.5 R03G\_16392  
Query: 1 AAAAGGATCATGACGGTACATG 22  
|||||\*|||||:||||\*|\*  
Sbjct: 102 TTTTCCTAGCACTGCTATGAAA 81  
>miR5080 Score: 0.0 R03G\_15270  
Query: 1 AAAAGGATCATGACGGTACATG 22  
|||||  
Sbjct: 168 TTTTCCTAGTACTGCCATGTAC 147  
>miR5080 Score: 0.0 R03G\_14791  
Query: 1 AAAAGGATCATGACGGTACATG 22  
|||||  
Sbjct: 1119 TTTTCCTAGTACTGCCATGTAC 1098  
>miR5080 Score: 2.5 R03G\_14795  
Query: 1 AAAAGGATCATGACGGTACATG 22  
|||||\*|||||:||||\*|\*  
Sbjct: 1122 TTTTCCTAGCACTGCTATGAAA 1101  
>miR5080 Score: 0.0 R03G\_14798  
Query: 1 AAAAGGATCATGACGGTACATG 22  
|||||  
Sbjct: 1119 TTTTCCTAGTACTGCCATGTAC 1098  
>miR5080 Score: 2.0 R03G\_08770  
Query: 1 AAAAGGATCATGACGGTA-CATG 22  
|||||\*|||||\*||\*|

Sbjct: 311 TTTTCCTAGTTCTGCCATGGTCC 289  
>miR5080 Score: 0.0 R03G\_09180  
Query: 1 AAAAGGATCATGACGGTACATG 22  
|||||  
Sbjct: 1119 TTTTCCTAGTACTGCCATGTAC 1098  
>miR5080 Score: 0.0 R03G\_09189  
Query: 1 AAAAGGATCATGACGGTACATG 22  
|||||  
Sbjct: 1119 TTTTCCTAGTACTGCCATGTAC 1098  
>miR5080 Score: 0.0 R03G\_06734  
Query: 1 AAAAGGATCATGACGGTACATG 22  
|||||  
Sbjct: 423 TTTTCCTAGTACTGCCATGTAC 402  
>miR4221 Score: 0.5 R03G\_12138  
Query: 1 TAAGAGGTTCAAAGGTAGGAAA 23  
|||||:|||||  
Sbjct: 867 ATTCTCCAAGTTTTCTATCCTTT 845  
>miR4221 Score: 0.5 R03G\_09361  
Query: 1 TAAGAGGTTCAAAGGTAGGAAA 23  
|||||:|||||  
Sbjct: 912 ATTCTCCAAGTTTTCTATCCTTT 890  
>miR4221 Score: 0.0 R03G\_05627  
Query: 1 TAAGAGGTTCAAAGGTAGGAAA 23  
|||||  
Sbjct: 126 ATTCTCCAAGTTTTCCATCCTTT 104  
>miR4221 Score: 0.0 R03G\_04030  
Query: 1 TAAGAGGTTCAAAGGTAGGAAA 23  
|||||  
Sbjct: 1233 ATTCTCCAAGTTTTCCATCCTTT 1211  
>miR396a-3p Score: 2.2 R03G\_11676  
Query: 1 GTTCAATAAAGCTGTGGGAA 20  
:|||||:||||:\*\*|  
Sbjct: 1432 TAAGTTATTTTGACACTAAT 1413  
>miR396a-3p Score: 2.5 R03G\_08313  
Query: 1 GTTCAATAAAGCTGTGGGAA 20  
||:|||||\*||\*|\*  
Sbjct: 1089 CAGGTTATTTTCGAAACC-TA 1071  
>miR396a-3p Score: 2.0 R03G\_02514  
Query: 1 GTTCAATAAAGCTGTGGGAA 20  
:|||||\*||||:|  
Sbjct: 471 TAAGTTATTTGGACACTTTT 452  
>miR5785 Score: 0.0 R03G\_10717  
Query: 1 TAGTGTTGTCCGTGCGAATCAGA 23  
|||||  
Sbjct: 289 ATCACAACAGGCACGCTTAGTCT 267

>miR4374b Score: 1.8 R03G\_16714  
Query: 1 TCTTCAAAGACGGTTGTGAG 20  
||||\*|||||||\*|:  
Sbjct: 209 AGAAGATTCTGCCAACAGTT 190

>miR4374b Score: 2.5 R03G\_16803  
Query: 1 TCTTCAAAGACGGTTGTGAG 20  
||||\*|\*|||||||\*||  
Sbjct: 92 AGAAGATCCTGCCAACAGTC 73

>miR4374b Score: 0.0 R03G\_14983  
Query: 1 TCTTCAAAGACGGTTGTGAG 20  
|||||||  
Sbjct: 656 AGAAGTTTCTGCCAACACTC 637

>miR4374b Score: 0.0 R03G\_13914  
Query: 1 TCTTCAAAGACGGTTGTGAG 20  
|||||||  
Sbjct: 851 AGAAGTTTCTGCCAACACTC 832

>miR4374b Score: 1.0 R03G\_12667  
Query: 1 TCTTCAAAGACGGTTGTGAG 20  
||||\*|||||||  
Sbjct: 221 AGAAGGTTCTGCCAACACTC 202

>miR4374b Score: 0.0 R03G\_12058  
Query: 1 TCTTCAAAGACGGTTGTGAG 20  
|||||||  
Sbjct: 851 AGAAGTTTCTGCCAACACTC 832

>miR4374b Score: 1.5 R03G\_11295  
Query: 1 TCTTCAAAGACGGTTGTGAG 20  
|||||||:|:|\*|  
Sbjct: 44 AGAAGTTTCTGTCAATAC-C 26

>miR4374b Score: 0.0 R03G\_10801  
Query: 1 TCTTCAAAGACGGTTGTGAG 20  
|||||||  
Sbjct: 656 AGAAGTTTCTGCCAACACTC 637

>miR4374b Score: 2.5 R03G\_09552  
Query: 1 TCTTCAAAGACGGTTGTGAG 20  
|:|:|:|:|:|:|\*|  
Sbjct: 490 AGGGGTTTCTGCTAACAACC 471

>miR4374b Score: 0.0 R03G\_09614  
Query: 1 TCTTCAAAGACGGTTGTGAG 20  
|||||||  
Sbjct: 182 AGAAGTTTCTGCCAACACTC 163

>miR4374b Score: 2.5 R03G\_05930  
Query: 1 TCTTCAAAGACGGTTGTGAG 20  
||||\*|\*|||||||\*||  
Sbjct: 515 AGAAGATCCTGCCAACAGTC 496

>miR4374b Score: 0.0 R03G\_02233

Query: 1 TCTTCAAAGACGGTTGTGAG 20  
|||||  
Sbjct: 380 AGAAGTTTCTGCCAACACTC 361  
>miR4374b Score: 2.5 R03G\_03556  
Query: 1 TCTTCAAAGACGGTTGTGAG 20  
||||\*|\*|  
Sbjct: 656 AGAAGATCCTGCCAACAGTC 637  
>miR4374b Score: 1.0 R03G\_03583  
Query: 1 TCTTCAAAGACGGTTGTGAG 20  
|||||\*|  
Sbjct: 656 AGAAGTTTCTGACAACACTC 637  
>miR4374b Score: 2.5 R03G\_03794  
Query: 1 TCTTCAAAGACGGTTGTGAG 20  
||||\*|\*|  
Sbjct: 92 AGAAGATCCTGCCAACAGTC 73  
>miR4374b Score: 0.0 R03G\_17462  
Query: 1 TCTTCAAAGACGGTTGTGAG 20  
|||||  
Sbjct: 983 AGAAGTTTCTGCCAACACTC 964  
>miR4374b Score: 0.0 R03G\_17451  
Query: 1 TCTTCAAAGACGGTTGTGAG 20  
|||||  
Sbjct: 92 AGAAGTTTCTGCCAACACTC 73  
>miR4374b Score: 2.5 R03G\_17374  
Query: 1 TCTTCAAAGACGGTTGTGAG 20  
||||\*|\*|  
Sbjct: 92 AGAAGATCCTGCCAACAGTC 73  
>miR4374b Score: 2.5 R03G\_17281  
Query: 1 TCTTCAAAGACGGTTGTGAG 20  
||||\*|\*|  
Sbjct: 92 AGAAGATCCTGCCAACAGTC 73  
>miR5544 Score: 0.0 R03G\_16896  
Query: 1 AAAACACGCATAGGAAGTTGGT 22  
|||||  
Sbjct: 565 TTTTGTGCGTATCCTTCAACCA 544  
>miR5544 Score: 0.0 R03G\_13296  
Query: 1 AAAACACGCATAGGAAGTTGGT 22  
|||||  
Sbjct: 565 TTTTGTGCGTATCCTTCAACCA 544  
>miR5544 Score: 0.0 R03G\_12002  
Query: 1 AAAACACGCATAGGAAGTTGGT 22  
|||||  
Sbjct: 565 TTTTGTGCGTATCCTTCAACCA 544  
>miR5544 Score: 0.0 R03G\_03748  
Query: 1 AAAACACGCATAGGAAGTTGGT 22



|||||  
Sbjct: 241 TTTTGTGCGTATCCTTCAACCA 220  
>miR5544 Score: 0.0 R03G\_01537  
Query: 1 AAAACACGCATAGGAAGTTGGT 22  
|||||  
Sbjct: 421 TTTTGTGCGTATCCTTCAACCA 400  
>miR5544 Score: 2.5 R03G\_01673  
Query: 1 AAAACACGCATAGGAAGT-TGGT 22  
\*|||||:|\*|\*|||  
Sbjct: 432 ATTTGTGCGTATCTTTGAAACCA 410  
>miR826b Score: 2.5 R03G\_16423  
Query: 1 TGGTCTTGACATCGATGAAAAT 22  
|:|\*|||||\*|\*|  
Sbjct: 53 ATCTGAACTGTAGCTACTGTAA 32  
>miR826b Score: 2.5 R03G\_15253  
Query: 1 TGGTCTTGACATCGATGAAAAT 22  
|:|\*|||||\*|\*|  
Sbjct: 53 ATCTGAACTGTAGCTACTGTAA 32  
>miR826b Score: 2.5 R03G\_12175  
Query: 1 TGGTCTTGACATCGATGAAAAT 22  
|:|\*|||||\*|\*|  
Sbjct: 53 ATCTGAACTGTAGCTACTGTAA 32  
>miR826b Score: 2.5 R03G\_01713  
Query: 1 TGGTCTTGACATCGATGAAAAT 22  
|:|\*|||||\*|\*|  
Sbjct: 53 ATCTGAACTGTAGCTACTGTAA 32  
>miR7800 Score: 2.5 R03G\_16617  
Query: 1 TATTTTTGTCTCGTCTGGTC 20  
\*|:|::|\*||  
Sbjct: 115 CTGAAAGTAGAGCAGAC-AG 97  
>miR7800 Score: 1.0 R03G\_16359  
Query: 1 TATTTTTGTCTCGTCTGGTC 20  
|||||:|||||:  
Sbjct: 456 ATAAAAGCAGAGCAGACTGG 437  
>miR7800 Score: 1.5 R03G\_16363  
Query: 1 TATTTTTGTCTCGTCTGGTC 20  
\*|||||:|:  
Sbjct: 456 CTAAAACAGAGCAGGCTGG 437  
>miR7800 Score: 1.0 R03G\_16545  
Query: 1 TATTTTTGTCTCGTCTGGTC 20  
|||||:|||||:  
Sbjct: 456 ATAAAAGCAGAGCAGACTGG 437  
>miR7800 Score: 1.0 R03G\_16554  
Query: 1 TATTTTTGTCTCGTCTGGTC 20  
\*|||||:|

Sbjct: 456 CTAAAAACAGAGCAGACTGG 437  
>miR7800 Score: 2.2 R03G\_16206  
Query: 1 TATTTTTGTCTCGTCTGGTC 20  
|||:|:||||\*|||||:|  
Sbjct: 2221 ATAGAAGCAGAACAGACCGG 2202  
>miR7800 Score: 2.0 R03G\_15651  
Query: 1 TATTTTTGTCTCGTCTGGTC 20  
\*|||||||\*||||||\*||  
Sbjct: 250 CTAAAAACATAGCAGAC-AG 232  
>miR7800 Score: 2.0 R03G\_15575  
Query: 1 TATTTTTGTCTCGTCTGGTC 20  
|||||:||||||\*||:|  
Sbjct: 279 ATAAAAGCAGAGCAAAGTGG 260  
>miR7800 Score: 2.5 R03G\_15579  
Query: 1 TATTTTTGTCTCGTCTGGTC 20  
\*||:|||||||:|:|:|  
Sbjct: 456 CTAGAAACAGAGTAGGCTGG 437  
>miR7800 Score: 1.0 R03G\_15001  
Query: 1 TATTTTTGTCTCGTCTGGTC 20  
|||||:|||||||:|  
Sbjct: 279 ATAAAAGCAGAGCAGACTGG 260  
>miR7800 Score: 1.0 R03G\_15146  
Query: 1 TATTTTTGTCTCGTCTGGTC 20  
\*|||||||:|:|:|  
Sbjct: 336 CTAAAAACAGAGCAGACTGG 317  
>miR7800 Score: 2.5 R03G\_14567  
Query: 1 TATTTTTGTCTCGTCTGGTC 20  
\*||:|||||||:|:|:|  
Sbjct: 234 CTAGAAACAGAGTAGGCTGG 215  
>miR7800 Score: 2.5 R03G\_14150  
Query: 1 TATTTTTGTCTCGTCTGGTC 20  
|||:||||:|:|\*|||  
Sbjct: 137 ATAGAAACGGAGTAGAGCAG 118  
>miR7800 Score: 2.5 R03G\_14349  
Query: 1 TATTTTTGTCTCGTCTGGTC 20  
\*|:|||||||:|:|:|  
Sbjct: 456 CTGAAAACAGAGTAGGCTGG 437  
>miR7800 Score: 2.5 R03G\_13502  
Query: 1 TATTTTTGTCTCGTCTGGTC 20  
||||:|\*||||\*|||||  
Sbjct: 287 ATAAGAAAAGAGCTGACCAG 268  
>miR7800 Score: 2.0 R03G\_13718  
Query: 1 TATTTTTGTCTCGTCTGGTC 20  
\*|||||||:|:|:|  
Sbjct: 234 CTAAAAACAGAGTAGGCTGG 215

>miR7800 Score: 2.0 R03G\_13733  
Query: 1 TATTTTGTCTCGTCTGGTC 20  
\*|||||||:|:|:|  
Sbjct: 234 CTAAAAACAGAGTAGGCTGG 215

>miR7800 Score: 2.0 R03G\_13137  
Query: 1 TATTTTGTCTCGTCTGGTC 20  
\*|||||||:|:|:|  
Sbjct: 456 CTAAAAACAGAGTAGGCTGG 437

>miR7800 Score: 2.0 R03G\_13147  
Query: 1 TATTTTGTCTCGTCTGGTC 20  
\*|||||||:|:|:|  
Sbjct: 234 CTAAAAACAGAGTAGGCTGG 215

>miR7800 Score: 1.0 R03G\_13266  
Query: 1 TATTTTGTCTCGTCTGGTC 20  
|||||:|||||||:|  
Sbjct: 234 ATAAAAGCAGAGCAGACTGG 215

>miR7800 Score: 1.0 R03G\_13271  
Query: 1 TATTTTGTCTCGTCTGGTC 20  
|||||:|||||||:|  
Sbjct: 456 ATAAAAGCAGAGCAGACTGG 437

>miR7800 Score: 1.0 R03G\_13277  
Query: 1 TATTTTGTCTCGTCTGGTC 20  
|||||:|||||||:|  
Sbjct: 456 ATAAAAGCAGAGCAGACTGG 437

>miR7800 Score: 1.0 R03G\_11240  
Query: 1 TATTTTGTCTCGTCTGGTC 20  
|||||:|||||||:|  
Sbjct: 279 ATAAAAGCAGAGCAGACTGG 260

>miR7800 Score: 2.5 R03G\_11254  
Query: 1 TATTTTGTCTCGTCTGGTC 20  
|\*|||||||\*||||\*||  
Sbjct: 21 AAAAAACAGAACAGAC-AG 3

>miR7800 Score: 1.0 R03G\_11266  
Query: 1 TATTTTGTCTCGTCTGGTC 20  
|||||:|||||||:|  
Sbjct: 279 ATAAAAGCAGAGCAGACTGG 260

>miR7800 Score: 2.5 R03G\_10837  
Query: 1 TATTTTGTCTCGTCTGGTC 20  
|||:||||||:|:|\*  
Sbjct: 1170 ATAGGAACAGAGTAGGCCAC 1151

>miR7800 Score: 2.5 R03G\_10846  
Query: 1 TATTTTGTCTCGTCTGGTC 20  
|||:||||||:|:|\*  
Sbjct: 1170 ATAGGAACAGAGTAGGCCAC 1151

>miR7800 Score: 1.0 R03G\_10866

Query: 1 TATTTTTGTCTCGTCTGGTC 20  
|||||:|||||:|  
Sbjct: 456 ATAAAAGCAGAGCAGACTGG 437  
>miR7800 Score: 1.0 R03G\_09612  
Query: 1 TATTTTTGTCTCGTCTGGTC 20  
|||||:|||||:|  
Sbjct: 456 ATAAAAGCAGAGCAGACTGG 437  
>miR7800 Score: 1.0 R03G\_08663  
Query: 1 TATTTTTGTCTCGTCTGGTC 20  
|||||:|||||:|  
Sbjct: 456 ATAAAAGCAGAGCAGACTGG 437  
>miR7800 Score: 1.5 R03G\_08842  
Query: 1 TATTTTTGTCTCGTCTGGTC 20  
\*|||||:|:|  
Sbjct: 456 CTAAAACAGAGCAGGCTGG 437  
>miR7800 Score: 2.2 R03G\_08964  
Query: 1 TATTTTTGTCTCGTCTGGTC 20  
|||\*|:|||||:|||||:|  
Sbjct: 921 ATATAGACAGAGTAGACCGG 902  
>miR7800 Score: 1.0 R03G\_07031  
Query: 1 TATTTTTGTCTCGTCTGGTC 20  
\*|||||:|:|  
Sbjct: 456 CTAAAACAGAGCAGACTGG 437  
>miR7800 Score: 1.0 R03G\_07112  
Query: 1 TATTTTTGTCTCGTCTGGTC 20  
|||||:|||||:|:|  
Sbjct: 279 ATAAAAGCAGAGCAGACTGG 260  
>miR7800 Score: 1.0 R03G\_07120  
Query: 1 TATTTTTGTCTCGTCTGGTC 20  
|||||:|||||:|:|  
Sbjct: 279 ATAAAAGCAGAGCAGACTGG 260  
>miR7800 Score: 1.5 R03G\_07688  
Query: 1 TATTTTTGTCTCGTCTGGTC 20  
|||||:|||||:|:|  
Sbjct: 456 ATAAAAGCAGAGTAGACTGG 437  
>miR7800 Score: 2.0 R03G\_07877  
Query: 1 TATTTTTGTCTCGTCTGGTC 20  
\*|||||:|:|:|:|  
Sbjct: 234 CTAAAACAGAGTAGGCTGG 215  
>miR7800 Score: 1.0 R03G\_06722  
Query: 1 TATTTTTGTCTCGTCTGGTC 20  
|||||:|||||:|:|  
Sbjct: 456 ATAAAAGCAGAGCAGACTGG 437  
>miR7800 Score: 2.0 R03G\_02844  
Query: 1 TATTTTTGTCTCGTCTGGTC 20

\*|||||||:|:|:|  
Sbjct: 234 CTAAAAACAGAGTAGGCTGG 215  
>miR7800 Score: 2.0 R03G\_03017  
Query: 1 TATTTTGTCTCGTCTGGTC 20  
\*|||||||:|||||||\*|\*  
Sbjct: 163 TTAAAAACGGAGCAGAC-AC 145  
>miR7800 Score: 2.0 R03G\_03113  
Query: 1 TATTTTGTCTCGTCTGGTC 20  
\*|||||||:|:|:|  
Sbjct: 198 CTAAAAACAGAGTAGGCTGG 179  
>miR7800 Score: 2.0 R03G\_03766  
Query: 1 TATTTTGTCTCGTCTGGTC 20  
\*|||||||:|:|:|  
Sbjct: 234 CTAAAAACAGAGTAGGCTGG 215  
>miR7800 Score: 2.0 R03G\_03772  
Query: 1 TATTTTGTCTCGTCTGGTC 20  
\*|||||||:|:|:|  
Sbjct: 456 CTAAAAACAGAGTAGGCTGG 437  
>miR7800 Score: 2.0 R03G\_03803  
Query: 1 TATTTTGTCTCGTCTGGTC 20  
|||||:||||\*||||:|  
Sbjct: 279 ATAAAAGCAGAGAAGACTGG 260  
>miR7800 Score: 2.5 R03G\_03862  
Query: 1 TATTTTGTCTCGTCTGGTC 20  
\*|||||||:||||\*||  
Sbjct: 752 TTAAAAACAGGACAGACGAG 733  
>miR7800 Score: 2.5 R03G\_04205  
Query: 1 TATTTTGTCTCGTCTGGTC 20  
\*||:||||||:|:|:|  
Sbjct: 234 CTAGAAACAGAGTAGGCTGG 215  
>miR7800 Score: 1.0 R03G\_00255  
Query: 1 TATTTTGTCTCGTCTGGTC 20  
|||||:|||||||:|  
Sbjct: 456 ATAAAAGCAGAGCAGACTGG 437  
>miR7800 Score: 2.0 R03G\_01618  
Query: 1 TATTTTGTCTCGTCTGGTC 20  
\*|||||||:|:|:|  
Sbjct: 456 CTAAAAACAGAGTAGGCTGG 437  
>miR7800 Score: 2.0 R03G\_17363  
Query: 1 TATTTTGTCTCGTCTGGTC 20  
\*|||||||:|:|:|  
Sbjct: 198 CTAAAAACAGAGTAGGCTGG 179  
>miR9759 Score: 2.2 R03G\_02813  
Query: 1 TAGTAAGCAAGTACGAGTTT-AT 22  
|||||||:||||\*:||\*||

Sbjct: 852 ATCATTCGTTTATGCTAGAAGTA 830  
>miR857 Score: 2.0 R03G\_16060  
Query: 1 TTTTGTATGTTGAAGGTGTG 20  
\*:|||:|||||||:||||  
Sbjct: 949 TGAACGTACAACCTTCTACAC 930  
>miR857 Score: 2.5 R03G\_14364  
Query: 1 TTTTGTATGTTGAAGGTGTG 20  
\*|||||\*||||||\*||||  
Sbjct: 165 TAAACATCCAACCTTCGACAC 146  
>miR857 Score: 2.2 R03G\_13922  
Query: 1 TTTTGTATGTTGAAGGTGTG 20  
:|||||||:|\*|\*||  
Sbjct: 1540 GAAACATACAACCTTAA-AC 1522  
>miR857 Score: 2.5 R03G\_12689  
Query: 1 TTTTGTATGTTGAAGGTGTG 20  
\*|:|||||:||||||\*||||  
Sbjct: 102 CAGACATATAACTTCAACAC 83  
>miR857 Score: 0.8 R03G\_12721  
Query: 1 TTTTGTATGTTGAAGGTGTG 20  
|||||||:|||||:|  
Sbjct: 100 AAAACATACAATTTCCACGC 81  
>miR857 Score: 2.2 R03G\_12281  
Query: 1 TTTTGTATGTTGAAGGTGTG 20  
||:|||\*|||||||:|\*  
Sbjct: 765 AAGACACACAACCTCCACGG 746  
>miR857 Score: 2.5 R03G\_10291  
Query: 1 TTTTGTATGTTGAAGGTGTG 20  
|||||\*|||||\*|||||\*|  
Sbjct: 4699 AAAACAAACAACATCCAC-C 4681  
>miR857 Score: 2.2 R03G\_10294  
Query: 1 TTTTGTATGTTGAAGGTGTG 20  
:||:|||||||\*||||||\*  
Sbjct: 346 GAAGCATACAACCTCCACAA 327  
>miR857 Score: 2.5 R03G\_07876  
Query: 1 TTTTGTATGTTGAAGGTGTG 20  
|||:|||||:|:|||:|\*||  
Sbjct: 25 AAAGCATACGATTTCTAAAC 6  
>miR857 Score: 2.5 R03G\_05896  
Query: 1 TTTTGTATGTTGAAGGTGTG 20  
\*::|||||||:|\*||  
Sbjct: 102 TGGACATACAACCTCCGGAC 83  
>miR857 Score: 2.5 R03G\_06365  
Query: 1 TTTTGTATGTTGAAGGTGTG 20  
|||||:|\*|:||||||\*||  
Sbjct: 1203 AAAACGTAAGACTTCCAGAC 1184

>miR857 Score: 1.5 R03G\_06407  
Query: 1 TTTTGTATGTTGAAGGTGT-G 20  
|:|||||||:||||||\*|  
Sbjct: 325 AGAACATACAATTTCCACAGC 305

>miR857 Score: 2.5 R03G\_04379  
Query: 1 TTTTGTATGTTGAAGGTGTG 20  
||||\*||\*||||||\*||  
Sbjct: 188 AAAACCTACTACTTCCA-AC 170

>miR857 Score: 2.5 R03G\_02261  
Query: 1 TTTTGTATGTTGAAGGTGTG 20  
|||||||:||||\*||\*::  
Sbjct: 102 AAAACATATAACTACCA-GT 84

>miR857 Score: 2.5 R03G\_02274  
Query: 1 TTTTGTATGTTGAAGGTGTG 20  
|||||||:|\*|::  
Sbjct: 2499 AAAACATACAACCTTTTCCGT 2480

>miR857 Score: 2.2 R03G\_02414  
Query: 1 TTTTGTATGTTGAAGGTGTG 20  
||:||\*|||||||:|\*  
Sbjct: 765 AAGACACACAACCTTCCACGG 746

>miR857 Score: 2.5 R03G\_02897  
Query: 1 TTTTGTATGTTGAAGGTGTG 20  
|||||||\*||||||\*|\*|  
Sbjct: 2737 AAAACATAAAACTTCCTC-C 2719

>miR857 Score: 2.2 R03G\_03544  
Query: 1 TTTTGTATGTTGAAGGTGTG 20  
:|||\*|||||||:|:  
Sbjct: 51 GAAATTTACAACCTTCCATAT 32

>miR857 Score: 2.5 R03G\_00772  
Query: 1 TTTTGTATGTTGAAGGTG-TG 20  
||\*|||||||\*||\*||  
Sbjct: 465 AAACCATACAACCTGCCACCAC 445

>miR857 Score: 2.5 R03G\_00834  
Query: 1 TTTTGTATGTTGAAGGTGTG 20  
|||||||:||\*|:|:||||  
Sbjct: 165 AAAACATATAACATTTACAC 146

>miR857 Score: 2.2 R03G\_01274  
Query: 1 TTTTGTATGTTGAAGGTGTG 20  
|||||||:||||\*\*|:  
Sbjct: 397 AAAACATACAATTTCCCGAT 378

>miR857 Score: 2.5 R03G\_17402  
Query: 1 TTTTGTATGTTGAAGGTGTG 20  
:||||\*||||:||||\*|:  
Sbjct: 208 GAAACACACAATTTCCAAAT 189

>miR6185 Score: 0.0 R03G\_13220

Query: 1 TCTGGCAGCACGGGTAACAGTA 22  
|||||  
Sbjct: 1227 AGACCGTCGTGCCATTGTCAT 1206  
>miR6185 Score: 0.0 R03G\_13223  
Query: 1 TCTGGCAGCACGGGTAACAGTA 22  
|||||  
Sbjct: 1227 AGACCGTCGTGCCATTGTCAT 1206  
>miR6185 Score: 0.0 R03G\_04119  
Query: 1 TCTGGCAGCACGGGTAACAGTA 22  
|||||  
Sbjct: 1227 AGACCGTCGTGCCATTGTCAT 1206  
>miR6185 Score: 0.0 R03G\_04122  
Query: 1 TCTGGCAGCACGGGTAACAGTA 22  
|||||  
Sbjct: 1227 AGACCGTCGTGCCATTGTCAT 1206  
>miR172b-5p Score: 2.5 R03G\_05884  
Query: 1 GCAGCACCATTAAGATTAC 20  
|||||\*|||:\*\*|  
Sbjct: 1598 CGTCGTGGTACTTCTAGTCG 1579  
>miR1535a Score: 0.0 R03G\_17160  
Query: 1 TTCTGTTTGTGCGTGATGTCTT 22  
|||||  
Sbjct: 80 AAGACAAACACGCACTACAGAA 59  
>miR1535a Score: 0.0 R03G\_15884  
Query: 1 TTCTGTTTGTGCGTGATGTCTT 22  
|||||  
Sbjct: 80 AAGACAAACACGCACTACAGAA 59  
>miR1535a Score: 2.0 R03G\_09380  
Query: 1 TTCTGTTTGTGCGTGATGTCTT 22  
||\*|||||\*:||:  
Sbjct: 274 AACACAAACACGCACTA-GGAG 254  
>miR1535a Score: 0.0 R03G\_09486  
Query: 1 TTCTGTTTGTGCGTGATGTCTT 22  
|||||  
Sbjct: 80 AAGACAAACACGCACTACAGAA 59  
>miR1535a Score: 2.5 R03G\_09571  
Query: 1 TTCTGTTTGTGCGTGATGTCTT 22  
||||\*|||||:||||\*:||:  
Sbjct: 960 AAGAGAAACACGTACTA-GGAG 940  
>miR1535a Score: 0.2 R03G\_02698  
Query: 1 TTCTGTTTGTGCGTGATGTCTT 22  
:|||||  
Sbjct: 80 GAGACAAACACGCACTACAGAA 59  
>miR530 Score: 2.5 R03G\_05852  
Query: 1 TGATTATGCACCTGGCTCTC 20



||||:|:|||||||\*|\*||  
Sbjct: 536 ACTAGTGC GTGGACCAAAAAG 517  
>miR6118-5p Score: 1.0 R03G\_14109  
Query: 1 TGGAATGGGTGCTTGGGAAA 20  
|:|||||||\*|  
Sbjct: 84 ATCTTACCCACGAACCCTCT 65  
>miR6118-5p Score: 1.0 R03G\_11276  
Query: 1 TGGAATGGGTGCTTGGGAAA 20  
|||||:|||||||\*|  
Sbjct: 270 ACCTTATCCACGAACCCTCT 251  
>miR6118-5p Score: 2.5 R03G\_09531  
Query: 1 TGGAATGGGTGCTTGGGA-AA 20  
\*||\*|||||||:|\*||  
Sbjct: 618 TCCGTACCCACGAACCTTATT 598  
>miR6118-5p Score: 0.5 R03G\_04428  
Query: 1 TGGAATGGGTGCTTGGGAAA 20  
|||||||\*|  
Sbjct: 1551 ACCTTACCCACGAACCCTCT 1532  
>miR6118-5p Score: 0.0 R03G\_01147  
Query: 1 TGGAATGGGTGCTTGGGAAA 20  
|||||||  
Sbjct: 231 ACCTTACCCACGAACCCTTT 212  
>miR6118-5p Score: 0.0 R03G\_01161  
Query: 1 TGGAATGGGTGCTTGGGAAA 20  
|||||||  
Sbjct: 231 ACCTTACCCACGAACCCTTT 212  
>miR1140 Score: 2.5 R03G\_05846  
Query: 1 ACAGCCTAAACCAATCGGAG 20  
||||\*||||||\*||\*|  
Sbjct: 407 TGTCGTATTTGGTTACCCAC 388

Supplemental Table 5: FGSC-9543 novel miRNA target (TF)

#miRNA mRNA Score Match\_pos Strand Pairing target and miRNA

query=novel\_mir\_128, target=R03G\_17255, score=0, range=1822-1843, strand=1

target 5' CCUCUGAAGUGUGCGGUGCUCA 3'

::::::::::::::::::::::::::

query 3' GGAGACUUCACACGCCACGAGU 5'

query=novel\_mir\_128, target=R03G\_11979, score=0, range=1825-1846, strand=1

target 5' CCUCUGAAGUGUGCGGUGCUCA 3'

::::::::::::::::::::::::::

query 3' GGAGACUUCACACGCCACGAGU 5'

query=novel\_mir\_128, target=R03G\_13448, score=0, range=1837-1858, strand=1

target 5' CCUCUGAAGUGUGCGGUGCUCA 3'

::::::::::::::::::::::::::

query 3' GGAGACUUCACACGCCACGAGU 5'

query=novel\_mir\_128, target=R03G\_01294, score=0, range=940-961, strand=1

target 5' CCUCUGAAGUGUGCGGUGCUCA 3'

::::::::::::::::::::::::::

query 3' GGAGACUUCACACGCCACGAGU 5'

query=novel\_mir\_128, target=R03G\_17156, score=0, range=124-145, strand=1

target 5' CCUCUGAAGUGUGCGGUGCUCA 3'

::::::::::::::::::::::::::

query 3' GGAGACUUCACACGCCACGAGU 5'

query=novel\_mir\_128, target=R03G\_07735, score=1, range=1771-1792, strand=1

target 5' CCUCUAAAGUGUGCGGUGCUCA 3'

::::: ::::::::::::::::::::

query 3' GGAGACUUCACACGCCACGAGU 5'

query=novel\_mir\_128, target=R03G\_10543, score=1, range=1324-1345, strand=1

target 5' CCUCUAAAGUGUGCGGUGCUCA 3'

::::: ::::::::::::::::::::

query 3' GGAGACUUCACACGCCACGAGU 5'

query=novel\_mir\_39, target=R03G\_19037, score=0, range=1-22, stran

target 5' CUCACCACUAUACUACCGAAGA 3'

::::::::::::::::::::::::::

query 3' GAGUGGUGAUAUGAUGGCUUCU 5'

query=novel\_mir\_39, target=R03G\_19036, score=0, range=1-22, stran

target 5' CUCACCACUAUACUACCGAAGA 3'

::::::::::::::::::::::::::

query 3' GAGUGGUGAUUAUGAUGGCUUCU 5'  
query=novel\_mir\_39, target=R03G\_19016, score=0, range=1-22, stran  
target 5' CUCACCACUAUACUACCGAAGA 3'  
.....  
query 3' GAGUGGUGAUUAUGAUGGCUUCU 5'  
query=novel\_mir\_39, target=R03G\_19102, score=0, range=1-22, stran  
target 5' CUCACCACUAUACUACCGAAGA 3'  
.....  
query 3' GAGUGGUGAUUAUGAUGGCUUCU 5'  
query=novel\_mir\_39, target=R03G\_19063, score=0, range=1-22, stran  
target 5' CUCACCACUAUACUACCGAAGA 3'  
.....  
query 3' GAGUGGUGAUUAUGAUGGCUUCU 5'  
query=novel\_mir\_39, target=R03G\_19060, score=0, range=1-22, stran  
target 5' CUCACCACUAUACUACCGAAGA 3'  
.....  
query 3' GAGUGGUGAUUAUGAUGGCUUCU 5'  
query=novel\_mir\_39, target=R03G\_19160, score=0, range=1-22, stran  
target 5' CUCACCACUAUACUACCGAAGA 3'  
.....  
query 3' GAGUGGUGAUUAUGAUGGCUUCU 5'  
query=novel\_mir\_39, target=R03G\_19242, score=0, range=1-22, stran  
target 5' CUCACCACUAUACUACCGAAGA 3'  
.....  
query 3' GAGUGGUGAUUAUGAUGGCUUCU 5'  
query=novel\_mir\_39, target=R03G\_19071, score=0, range=1-22, stran  
target 5' CUCACCACUAUACUACCGAAGA 3'  
.....  
query 3' GAGUGGUGAUUAUGAUGGCUUCU 5'  
query=novel\_mir\_39, target=R03G\_19061, score=0, range=1-22, stran  
target 5' CUCACCACUAUACUACCGAAGA 3'  
.....  
query 3' GAGUGGUGAUUAUGAUGGCUUCU 5'  
query=novel\_mir\_39, target=R03G\_19117, score=0.5, range=1-22,  
strand=-1  
target 5' CUUACCACUAUACUACCGAAGA 3'  
.....  
query 3' GAGUGGUGAUUAUGAUGGCUUCU 5'  
query=novel\_mir\_39, target=R03G\_19213, score=0.5, range=1-22,  
strand=-1  
target 5' CUUACCACUAUACUACCGAAGA 3'  
.....  
query 3' GAGUGGUGAUUAUGAUGGCUUCU 5'  
query=novel\_mir\_39, target=R03G\_17289, score=4, range=1692-1712,  
strand=1





```
target 5' CUCACC-CUAUGGUACCGAAGA 3'
.....
query 3' GAGUGGUGAUAUGAUGGCUUCU 5'
query=novel_mir_39, target=R03G_15861, score=4, range=132-152,
strand=1
target 5' CUCACC-CUAUGGUACCGAAGA 3'
.....
query 3' GAGUGGUGAUAUGAUGGCUUCU 5'
query=novel_mir_33, target=R03G_19200, score=0, range=1-20, stran
target 5' ACCAACUCGGCCAUCCCUCC 3'
.....
query 3' UGGUUGAGCCGGUAGGGAGG 5'
query=novel_mir_33, target=R03G_19178, score=0, range=1-20, stran
target 5' ACCAACUCGGCCAUCCCUCC 3'
.....
query 3' UGGUUGAGCCGGUAGGGAGG 5'
query=novel_mir_33, target=R03G_19030, score=0, range=1-20, stran
target 5' ACCAACUCGGCCAUCCCUCC 3'
.....
query 3' UGGUUGAGCCGGUAGGGAGG 5'
query=novel_mir_33, target=R03G_19149, score=0, range=1-20, stran
target 5' ACCAACUCGGCCAUCCCUCC 3'
.....
query 3' UGGUUGAGCCGGUAGGGAGG 5'
query=novel_mir_33, target=R03G_19093, score=0, range=1-20, stran
target 5' ACCAACUCGGCCAUCCCUCC 3'
.....
query 3' UGGUUGAGCCGGUAGGGAGG 5'
query=novel_mir_33, target=R03G_19168, score=0, range=1-20, stran
target 5' ACCAACUCGGCCAUCCCUCC 3'
.....
query 3' UGGUUGAGCCGGUAGGGAGG 5'
query=novel_mir_33, target=R03G_19029, score=0, range=1-20, stran
target 5' ACCAACUCGGCCAUCCCUCC 3'
.....
query 3' UGGUUGAGCCGGUAGGGAGG 5'
query=novel_mir_33, target=R03G_11197, score=3.5, range=401-420,
strand=1
target 5' UCCGCCUCGGCCAUCUCUCC 3'
.. .....
query 3' UGGUUGAGCCGGUAGGGAGG 5'
query=novel_mir_33, target=R03G_15062, score=4, range=392-411,
strand=1
target 5' AUCAGCCUGGCCAUCCUCC 3'
.....
```

query 3' UGGUUGAGCCGGUAGGGAGG 5'  
query=novel\_mir\_33, target=R03G\_05888, score=4, range=970-989,  
strand=1  
target 5' ACCUCUUGGCCAUCCUCC 3'  
::: :::::::::::::::  
query 3' UGGUUGAGCCGGUAGGGAGG 5'  
query=novel\_mir\_79, target=R03G\_09718, score=0, range=336-357,  
strand=1  
target 5' AGCCAGUUCUCCCAUAUUGUCA 3'  
:::::::::::::::::::::  
query 3' UCGGUCAAGAGGGUAUAACAGU 5'  
query=novel\_mir\_79, target=R03G\_12007, score=0, range=336-357,  
strand=1  
target 5' AGCCAGUUCUCCCAUAUUGUCA 3'  
:::::::::::::::::::::  
query 3' UCGGUCAAGAGGGUAUAACAGU 5'  
query=novel\_mir\_79, target=R03G\_13293, score=0, range=336-357,  
strand=1  
target 5' AGCCAGUUCUCCCAUAUUGUCA 3'  
:::::::::::::::::::::  
query 3' UCGGUCAAGAGGGUAUAACAGU 5'  
query=novel\_mir\_79, target=R03G\_10177, score=0, range=336-357,  
strand=1  
target 5' AGCCAGUUCUCCCAUAUUGUCA 3'  
:::::::::::::::::::::  
query 3' UCGGUCAAGAGGGUAUAACAGU 5'  
query=novel\_mir\_79, target=R03G\_03867, score=0, range=336-357,  
strand=1  
target 5' AGCCAGUUCUCCCAUAUUGUCA 3'  
:::::::::::::::::::::  
query 3' UCGGUCAAGAGGGUAUAACAGU 5'  
query=novel\_mir\_79, target=R03G\_01475, score=0, range=336-357,  
strand=1  
target 5' AGCCAGUUCUCCCAUAUUGUCA 3'  
:::::::::::::::::::::  
query 3' UCGGUCAAGAGGGUAUAACAGU 5'  
query=novel\_mir\_79, target=R03G\_15131, score=0, range=336-357,  
strand=1  
target 5' AGCCAGUUCUCCCAUAUUGUCA 3'  
:::::::::::::::::::::  
query 3' UCGGUCAAGAGGGUAUAACAGU 5'  
query=novel\_mir\_79, target=R03G\_01004, score=0, range=336-357,  
strand=1  
target 5' AGCCAGUUCUCCCAUAUUGUCA 3'  
:::::::::::::::::::::

```

query 3' UCGGUCAAGAGGGUUAACAGU 5'
query=novel_mir_79, target=R03G_13439, score=0, range=336-357,
strand=1
target 5' AGCCAGUUCUCCCAUAUUGUCA 3'
::::::::::::::::::::::::::::
query 3' UCGGUCAAGAGGGUUAACAGU 5'
query=novel_mir_79, target=R03G_16804, score=0, range=336-357,
strand=1
target 5' AGCCAGUUCUCCCAUAUUGUCA 3'
::::::::::::::::::::::::::::
query 3' UCGGUCAAGAGGGUUAACAGU 5'
query=novel_mir_79, target=R03G_10715, score=0, range=336-357,
strand=1
target 5' AGCCAGUUCUCCCAUAUUGUCA 3'
::::::::::::::::::::::::::::
query 3' UCGGUCAAGAGGGUUAACAGU 5'
query=novel_mir_79, target=R03G_09044, score=0, range=198-219,
strand=1
target 5' AGCCAGUUCUCCCAUAUUGUCA 3'
::::::::::::::::::::::::::::
query 3' UCGGUCAAGAGGGUUAACAGU 5'
query=novel_mir_79, target=R03G_04309, score=2, range=336-357,
strand=1
target 5' AUCCAGUUCUCCCGUAUUGUCA 3'
: :::::::::::::::::::::::
query 3' UCGGUCAAGAGGGUUAACAGU 5'
query=novel_mir_79, target=R03G_15002, score=3, range=336-357,
strand=1
target 5' AUCCAGUUCUCCCAUAUUGCCA 3'
: ::::::::::::::::::::::: ::
query 3' UCGGUCAAGAGGGUUAACAGU 5'
query=novel_mir_79, target=R03G_12536, score=3, range=336-357,
strand=1
target 5' AUCCAGUUCUCCCAUAUUGCCA 3'
: ::::::::::::::::::::::: ::
query 3' UCGGUCAAGAGGGUUAACAGU 5'
query=novel_mir_79, target=R03G_08601, score=3.5, range=47-69,
strand=1
target 5' AGUCAGUGACUCCUAUAUUGUCA 3'
: . . . . . : . . . . . : . . . . .
query 3' UCGGUCA-AGAGGGUUAACAGU 5'
query=novel_mir_101, target=R03G_13001, score=0, range=1134-1156,
strand=1
target 5' CUUAUGGUCUCGACAUUGUGGUA 3'
::::::::::::::::::::::::::::

```







query=novel\_mir\_31, target=R03G\_12163, score=2, range=473-494,  
strand=1  
target 5' CUCUUUGCAUGAACCCAGAACA 3'  
:: : :::::::::::::::::::::  
query 3' GAAAUACGUACUUGGGUCUUGU 5'  
query=novel\_mir\_31, target=R03G\_07972, score=3, range=584-605,  
strand=1  
target 5' CAUUGUGUAUGAAUCCAGAACA 3'  
: :::::::::::::::::::::  
query 3' GAAAUACGUACUUGGGUCUUGU 5'  
query=novel\_mir\_31, target=R03G\_04799, score=3.5, range=806-827,  
strand=1  
target 5' UUUUAUACAUGAACCAAGAACA 3'  
.:::::: :::::::::: ::::::::  
query 3' GAAAUACGUACUUGGGUCUUGU 5'  
query=novel\_mir\_119, target=R03G\_19205, score=0, range=1-23, stra  
target 5' UUUAACCAUUACACCACAAGACC 3'  
: :::::::::::::::::::::  
query 3' AAUUGGUAUGUGGUGUUCUGG 5'  
query=novel\_mir\_119, target=R03G\_19204, score=1, range=1-23, stra  
target 5' UUUAACCAUUACACCACAGGACC 3'  
: :::::::::::::::::::::  
query 3' AAUUGGUAUGUGGUGUUCUGG 5'  
query=novel\_mir\_119, target=R03G\_08537, score=3.5, range=384-406,  
strand=1  
target 5' UGUAACUAUUUAUAUCACAAGACC 3'  
: :::::::::::::::::::::  
query 3' AAUUGGUAUGUGGUGUUCUGG 5'  
query=novel\_mir\_119, target=R03G\_16088, score=3.5, range=749-770,  
strand=-1  
target 5' AAUAA-UUUUACACCACAAGACC 3'  
::: .:::::::::::::::::::  
query 3' AAUUGGUAUGUGGUGUUCUGG 5'  
query=novel\_mir\_119, target=R03G\_19051, score=4, range=1-24, stra  
target 5' GCUAACCAUUACAUCACAAGACC 3'  
: :::::::::::::::::::::  
query 3' AAUUGG-UAAUGUGGUGUUCUGG 5'  
query=novel\_mir\_37, target=R03G\_01150, score=0, range=691-712,  
strand=1  
target 5' CCUACCAAAGCCCGAGUCCCA 3'  
: :::::::::::::::::::::  
query 3' GGAUGGUUUCGGGCUCAAGGGU 5'  
query=novel\_mir\_37, target=R03G\_08905, score=0, range=691-712,  
strand=1  
target 5' CCUACCAAAGCCCGAGUCCCA 3'

```
.....
query 3' GGAUGGUUUCGGGCUCAAGGGU 5'
query=novel_mir_37, target=R03G_01159, score=0, range=691-712,
strand=1
target 5' CCUACCAAAGCCCGAGUCCCCA 3'
.....
query 3' GGAUGGUUUCGGGCUCAAGGGU 5'
query=novel_mir_37, target=R03G_03720, score=0, range=691-712,
strand=1
target 5' CCUACCAAAGCCCGAGUCCCCA 3'
.....
query 3' GGAUGGUUUCGGGCUCAAGGGU 5'
query=novel_mir_37, target=R03G_00795, score=0, range=691-712,
strand=1
target 5' CCUACCAAAGCCCGAGUCCCCA 3'
.....
query 3' GGAUGGUUUCGGGCUCAAGGGU 5'
query=novel_mir_37, target=R03G_08300, score=0, range=691-712,
strand=1
target 5' CCUACCAAAGCCCGAGUCCCCA 3'
.....
query 3' GGAUGGUUUCGGGCUCAAGGGU 5'
query=novel_mir_37, target=R03G_05951, score=0, range=691-712,
strand=1
target 5' CCUACCAAAGCCCGAGUCCCCA 3'
.....
query 3' GGAUGGUUUCGGGCUCAAGGGU 5'
query=novel_mir_37, target=R03G_11834, score=2, range=472-493,
strand=1
target 5' CCUACCAAAGCCCGAGUCCAA 3'
..... :
query 3' GGAUGGUUUCGGGCUCAAGGGU 5'
query=novel_mir_37, target=R03G_04029, score=3.5, range=670-691,
strand=1
target 5' UCUACUAAAGCCCGUGUCCCCG 3'
..... :
query 3' GGAUGGUUUCGGGCUCAAGGGU 5'
query=novel_mir_37, target=R03G_13485, score=3.5, range=505-526,
strand=1
target 5' UCUACUAAAGCCCGUGUCCCCG 3'
..... :
query 3' GGAUGGUUUCGGGCUCAAGGGU 5'
query=novel_mir_37, target=R03G_05620, score=4, range=670-691,
strand=1
target 5' UUUACUAAAGCCCGUGUCCCCG 3'
```

```
.....
query 3' GGAUGGUUUCGGGCUCAAGGGU 5'
query=novel_mir_71, target=R03G_09204, score=2.5, range=448-469,
strand=-1
target 5' CACCUUCUCUUGUCCUCUUGUA 3'
.....
query 3' GUGGGAGAGAACAGGAGAAAAU 5'
query=novel_mir_71, target=R03G_13411, score=4, range=164-184,
strand=1
target 5' AACCCU-UCUUAUCCUCUUUUA 3'
.....
query 3' GUGGGAGAGAACAGGAGAAAAU 5'
query=novel_mir_71, target=R03G_02113, score=4, range=2732-2752,
strand=-1
target 5' CAACCUCUCUUGU-UUCUUUUA 3'
:: .....
query 3' GUGGGAGAGAACAGGAGAAAAU 5'
query=novel_mir_71, target=R03G_12827, score=4, range=136-156,
strand=-1
target 5' CAUUCUCU-UUGUUCUCUUUUU 3'
.....
query 3' GUGGGAGAGAACAGGAGAAAAU 5'
query=novel_mir_70, target=R03G_16319, score=0, range=1912-1933,
strand=1
target 5' CCAAAGCCUUUUAACCCACCA 3'
.....
query 3' GGUUUCGGAAAAGUUGGGUGGU 5'
query=novel_mir_70, target=R03G_12207, score=0, range=1912-1933,
strand=1
target 5' CCAAAGCCUUUUAACCCACCA 3'
.....
query 3' GGUUUCGGAAAAGUUGGGUGGU 5'
query=novel_mir_70, target=R03G_00653, score=0, range=1912-1933,
strand=1
target 5' CCAAAGCCUUUUAACCCACCA 3'
.....
query 3' GGUUUCGGAAAAGUUGGGUGGU 5'
query=novel_mir_70, target=R03G_02944, score=0, range=1231-1252,
strand=1
target 5' CCAAAGCCUUUUAACCCACCA 3'
.....
query 3' GGUUUCGGAAAAGUUGGGUGGU 5'
query=novel_mir_70, target=R03G_07700, score=0, range=1231-1252,
strand=1
target 5' CCAAAGCCUUUUAACCCACCA 3'
```

```
.....
query 3' GGUUUCGGAAAAGUUGGGUGGU 5'
query=novel_mir_70, target=R03G_16888, score=0, range=1231-1252,
strand=1
target 5' CCAAAGCCUUUUAACCCACCA 3'
.....
query 3' GGUUUCGGAAAAGUUGGGUGGU 5'
query=novel_mir_70, target=R03G_01241, score=0, range=487-508,
strand=1
target 5' CCAAAGCCUUUUAACCCACCA 3'
.....
query 3' GGUUUCGGAAAAGUUGGGUGGU 5'
query=novel_mir_70, target=R03G_01244, score=0, range=94-115, str
target 5' CCAAAGCCUUUUAACCCACCA 3'
.....
query 3' GGUUUCGGAAAAGUUGGGUGGU 5'
query=novel_mir_70, target=R03G_08064, score=0, range=823-844,
strand=1
target 5' CCAAAGCCUUUUAACCCACCA 3'
.....
query 3' GGUUUCGGAAAAGUUGGGUGGU 5'
query=novel_mir_70, target=R03G_17284, score=0, range=91-112, str
target 5' CCAAAGCCUUUUAACCCACCA 3'
.....
query 3' GGUUUCGGAAAAGUUGGGUGGU 5'
query=novel_mir_70, target=R03G_11205, score=4, range=1008-1030,
strand=-1
target 5' CUAAAUUCUUUUAACACCACCA 3'
.....
query 3' GGUUUCGGAAAAGUUG-GGUGGU 5'
query=novel_mir_41, target=R03G_08791, score=2, range=57-78, stra
target 5' AGUACCAGUCAAUUAUCAAGUA 3'
...: .....
query 3' UUGUAGUCAGUAAUAGUUCAU 5'
query=novel_mir_41, target=R03G_00481, score=3.5, range=632-653,
strand=1
target 5' AGCGUCGAUCAAUUAUCAAGUC 3'
.....
query 3' UUGUAGUCAGUAAUAGUUCAU 5'
query=novel_mir_41, target=R03G_07585, score=4, range=1201-1221,
strand=-1
target 5' AACACCCGUCAAUU-UCAAGUA 3'
.....
query 3' UUGUAGUCAGUAAUAGUUCAU 5'
query=novel_mir_108, target=R03G_09361, score=2, range=1176-1195,
```



query 3' GUUUCG UUUUCU UUCGAUGU 5'  
query=novel\_mir\_80, target=R03G\_13308, score=1, range=141-162,  
strand=1  
target 5' CAAAGGCAAAGGAAAGGCUACA 3'

query 3' GUUUCG UUUUCU UUCGAUGU 5'  
query=novel\_mir\_80, target=R03G\_03080, score=1, range=72-93, stra  
target 5' CAAAGGCAAAGGAAAAGCUAUA 3'

query 3' GUUUCG UUUUCU UUCGAUGU 5'  
query=novel\_mir\_80, target=R03G\_10665, score=1, range=183-204,  
strand=1  
target 5' CAAAGACAAAGGAAAAGCUACA 3'

query 3' GUUUCG UUUUCU UUCGAUGU 5'  
query=novel\_mir\_80, target=R03G\_03876, score=2, range=159-180,  
strand=1  
target 5' CAAAGACAAAGGAAAAGCUAUA 3'

query 3' GUUUCG UUUUCU UUCGAUGU 5'  
query=novel\_mir\_80, target=R03G\_06787, score=2.5, range=159-180,  
strand=1  
target 5' CAAAGAUAAAGGAAAAGGCUACA 3'

query 3' GUUUCG UUUUCU UUCGAUGU 5'  
query=novel\_mir\_80, target=R03G\_10242, score=3, range=159-180,  
strand=1  
target 5' CAAAGGCAAAGUAAAAGCUAUA 3'

query 3' GUUUCG UUUUCU UUCGAUGU 5'  
query=novel\_mir\_80, target=R03G\_10415, score=3, range=141-162,  
strand=1  
target 5' CAAAGGCAAAGUAAAAGCUAUA 3'

query 3' GUUUCG UUUUCU UUCGAUGU 5'  
query=novel\_mir\_80, target=R03G\_00384, score=4, range=42-63, stra  
target 5' CAAAGGCAAAGAAAAGCUAGA 3'

query 3' GUUUCG UUUUCU UUCGAUGU 5'  
query=novel\_mir\_80, target=R03G\_13466, score=4, range=237-258,  
strand=1  
target 5' CAUAGCAAAGGAAAGGCUACU 3'

query 3' GUUUCG UUUUCU UUCGAUGU 5'





```
query=novel_mir_78, target=R03G_02646, score=3.5, range=612-631,
strand=-1
target 5' CCAUACGAUCUUUUACGCUG 3'
: : :::::::::::::::
query 3' AGAAAGCUAGAAAAUGCGAU 5'
query=novel_mir_78, target=R03G_12562, score=4, range=796-815,
strand=-1
target 5' UCUUCCGUCUUUUACGUUC 3'
:::::: .::::::::::::
query 3' AGAAAGCUAGAAAAUGCGAU 5'
query=novel_mir_78, target=R03G_15401, score=4, range=583-602,
strand=-1
target 5' UUAUUUGAUCUUUUACGUUU 3'
:. :::::::::::::::
query 3' AGAAAGCUAGAAAAUGCGAU 5'
query=novel_mir_78, target=R03G_00113, score=4, range=303-321,
strand=-1
target 5' UCCAUC-AUCUUUUUAUGCUA 3'
:: :: ::::::::::::::
query 3' AGAAAGCUAGAAAAUGCGAU 5'
query=novel_mir_78, target=R03G_13795, score=4, range=262-280,
strand=-1
target 5' GCUUGC-AUCUUUUACGCUU 3'
::: : ::::::::::::::
query 3' AGAAAGCUAGAAAAUGCGAU 5'
query=novel_mir_103, target=R03G_13622, score=0, range=176-195,
strand=1
target 5' CCGACCUCCUCUUCGAUACA 3'
:::::::::::::::::::::
query 3' GGCUGGAGGAGAAGCUAUGU 5'
query=novel_mir_103, target=R03G_01932, score=0, range=86-105,
strand=1
target 5' CCGACCUCCUCUUCGAUACA 3'
:::::::::::::::::::::
query 3' GGCUGGAGGAGAAGCUAUGU 5'
query=novel_mir_103, target=R03G_15964, score=3, range=41-61, str
target 5' CGGACCCUCCUCUUCGAUACC 3'
: :: :::::::::::::::
query 3' GGCU-GGAGGAGAAGCUAUGU 5'
query=novel_mir_103, target=R03G_14868, score=4, range=18-37,
strand=-1
target 5' UGGACUCCUCUUCGGUAUA 3'
. :::::::::::::::
query 3' GGCUGGAGGAGAAGCUAUGU 5'
query=novel_mir_103, target=R03G_14880, score=4, range=18-37,
```

```
strand=-1
target 5' UGGACUCCUCUUCGGUAUA 3'
. :::::::::::::::::::::
query 3' GGCUGGAGGAGAAGCUAUGU 5'
query=novel_mir_64, target=R03G_15271, score=2, range=980-1002,
strand=-1
target 5' CUUUUCUGCUAACACUGCUUGUA 3'
:::::::::::::::::::
query 3' GAAAAGACGAUUCUGACGAACAU 5'
query=novel_mir_64, target=R03G_12663, score=2, range=815-837,
strand=-1
target 5' CUUUUCUGCUAAGACAGCUUGUA 3'
:::::::::::::::::::
query 3' GAAAAGACGAUUCUGACGAACAU 5'
query=novel_mir_64, target=R03G_17355, score=2, range=815-837,
strand=-1
target 5' CUUUUCUGCUAAGACAGCUUGUA 3'
:::::::::::::::::::
query 3' GAAAAGACGAUUCUGACGAACAU 5'
query=novel_mir_64, target=R03G_17223, score=2, range=704-726,
strand=-1
target 5' CUUUUCUGCUAAGACAGCUUGUA 3'
:::::::::::::::::::
query 3' GAAAAGACGAUUCUGACGAACAU 5'
query=novel_mir_64, target=R03G_16706, score=2, range=704-726,
strand=-1
target 5' CUUUUCUGCUAAGACAGCUUGUA 3'
:::::::::::::::::::
query 3' GAAAAGACGAUUCUGACGAACAU 5'
query=novel_mir_64, target=R03G_09193, score=2, range=704-726,
strand=-1
target 5' CUUUUCUGCUAAGACAGCUUGUA 3'
:::::::::::::::::::
query 3' GAAAAGACGAUUCUGACGAACAU 5'
query=novel_mir_64, target=R03G_04674, score=3.5, range=731-753,
strand=-1
target 5' CUUCUUUGCUAAGACUGCUUGCA 3'
::: :::::::::::::::::::::
query 3' GAAAAGACGAUUCUGACGAACAU 5'
query=novel_mir_113, target=R03G_05904, score=0, range=277-298,
strand=1
target 5' UUGACUUAUAACACCACCCUAA 3'
:::::::::::::::::::
query 3' AACUGAAUAUUGUGGUGGGAUU 5'
query=novel_mir_113, target=R03G_12177, score=0, range=277-298,
```

strand=1  
target 5' UUGACUUAUAACACCACCCUAA 3'  
::::::::::::::::::::::::::  
query 3' AACUGAAUAUUGUGGUGGGAAU 5'  
query=novel\_mir\_113, target=R03G\_11267, score=0, range=277-298,  
strand=1  
target 5' UUGACUUAUAACACCACCCUAA 3'  
::::::::::::::::::::::::::  
query 3' AACUGAAUAUUGUGGUGGGAAU 5'  
query=novel\_mir\_113, target=R03G\_08653, score=0, range=277-298,  
strand=1  
target 5' UUGACUUAUAACACCACCCUAA 3'  
::::::::::::::::::::::::::  
query 3' AACUGAAUAUUGUGGUGGGAAU 5'  
query=novel\_mir\_113, target=R03G\_16699, score=0, range=277-298,  
strand=1  
target 5' UUGACUUAUAACACCACCCUAA 3'  
::::::::::::::::::::::::::  
query 3' AACUGAAUAUUGUGGUGGGAAU 5'  
query=novel\_mir\_113, target=R03G\_10549, score=0, range=277-298,  
strand=1  
target 5' UUGACUUAUAACACCACCCUAA 3'  
::::::::::::::::::::::::::  
query 3' AACUGAAUAUUGUGGUGGGAAU 5'  
query=novel\_mir\_113, target=R03G\_01305, score=0, range=277-298,  
strand=1  
target 5' UUGACUUAUAACACCACCCUAA 3'  
::::::::::::::::::::::::::  
query 3' AACUGAAUAUUGUGGUGGGAAU 5'  
query=novel\_mir\_113, target=R03G\_07995, score=0, range=277-298,  
strand=1  
target 5' UUGACUUAUAACACCACCCUAA 3'  
::::::::::::::::::::::::::  
query 3' AACUGAAUAUUGUGGUGGGAAU 5'  
query=novel\_mir\_113, target=R03G\_05638, score=0, range=277-298,  
strand=1  
target 5' UUGACUUAUAACACCACCCUAA 3'  
::::::::::::::::::::::::::  
query 3' AACUGAAUAUUGUGGUGGGAAU 5'  
query=novel\_mir\_113, target=R03G\_13770, score=0, range=277-298,  
strand=1  
target 5' UUGACUUAUAACACCACCCUAA 3'  
::::::::::::::::::::::::::  
query 3' AACUGAAUAUUGUGGUGGGAAU 5'  
query=novel\_mir\_113, target=R03G\_01700, score=0, range=331-352,

strand=1  
target 5' UUGACUUAUAACACCACCCUAA 3'  
::::::::::::::::::::::::::  
query 3' AACUGAAUAUUGUGGUGGGAAU 5'  
query=novel\_mir\_113, target=R03G\_09959, score=0, range=277-298,  
strand=1  
target 5' UUGACUUAUAACACCACCCUAA 3'  
::::::::::::::::::::::::::  
query 3' AACUGAAUAUUGUGGUGGGAAU 5'  
query=novel\_mir\_113, target=R03G\_14564, score=0, range=277-298,  
strand=1  
target 5' UUGACUUAUAACACCACCCUAA 3'  
::::::::::::::::::::::::::  
query 3' AACUGAAUAUUGUGGUGGGAAU 5'  
query=novel\_mir\_113, target=R03G\_06413, score=0, range=70-91, str  
target 5' UUGACUUAUAACACCACCCUAA 3'  
::::::::::::::::::::::::::  
query 3' AACUGAAUAUUGUGGUGGGAAU 5'  
query=novel\_mir\_113, target=R03G\_11280, score=0.5, range=277-298,  
strand=1  
target 5' UUGACUUAUAACACCACCCUAG 3'  
::::::::::::::::::::::::::.  
query 3' AACUGAAUAUUGUGGUGGGAAU 5'  
query=novel\_mir\_113, target=R03G\_16426, score=2, range=277-298,  
strand=1  
target 5' UUGACUUACAACACUACCCUAA 3'  
:::::::::: ::::::::::::::::::::  
query 3' AACUGAAUAUUGUGGUGGGAAU 5'  
query=novel\_mir\_113, target=R03G\_03936, score=2, range=277-298,  
strand=1  
target 5' UUGACUUACAACACUACCCUAA 3'  
:::::::::: ::::::::::::::::::::  
query 3' AACUGAAUAUUGUGGUGGGAAU 5'  
query=novel\_mir\_127, target=R03G\_14100, score=4, range=424-445,  
strand=1  
target 5' GGUGUUUGCUACUUAUCACGCA 3'  
:::: :.:::::::::: ::::  
query 3' CCACCAGUGAUGAAUAGUUCGU 5'  
query=novel\_mir\_102, target=R03G\_12521, score=0, range=577-598,  
strand=1  
target 5' CCUGCUAAGAUACAACGUAAUUA 3'  
::::::::::::::::::::::::::  
query 3' GGACGAUUCUAUGUUGCAUAAU 5'  
query=novel\_mir\_102, target=R03G\_00798, score=0, range=577-598,  
strand=1

```

target 5' CCUGCUAAGAUACAACGUUUUA 3'
: : : : : : : : : : : : : : : : : :
query 3' GGACGAUUCUAUGUUGCAUAAU 5'
query=novel_mir_102, target=R03G_12142, score=0, range=577-598,
strand=1
target 5' CCUGCUAAGAUACAACGUUUUA 3'
: : : : : : : : : : : : : : : : : :
query 3' GGACGAUUCUAUGUUGCAUAAU 5'
query=novel_mir_102, target=R03G_01651, score=0, range=358-379,
strand=1
target 5' CCUGCUAAGAUACAACGUUUUA 3'
: : : : : : : : : : : : : : : : : :
query 3' GGACGAUUCUAUGUUGCAUAAU 5'
query=novel_mir_102, target=R03G_04244, score=0, range=295-316,
strand=1
target 5' CCUGCUAAGAUACAACGUUUUA 3'
: : : : : : : : : : : : : : : : : :
query 3' GGACGAUUCUAUGUUGCAUAAU 5'
query=novel_mir_102, target=R03G_09105, score=1, range=295-316,
strand=1
target 5' CAUGCUAAGAUACAACGUUUUA 3'
: : : : : : : : : : : : : : : : : :
query 3' GGACGAUUCUAUGUUGCAUAAU 5'
query=novel_mir_102, target=R03G_06904, score=2, range=295-316,
strand=1
target 5' CCUGCUAAGGUACAAUGUAAUUA 3'
: : : : : : : : : : : : : : : : : :
query 3' GGACGAUUCUAUGUUGCAUAAU 5'
query=novel_mir_102, target=R03G_12136, score=2, range=577-598,
strand=1
target 5' CCUGCUAAGAUACAACAUAUUUA 3'
: : : : : : : : : : : : : : : : : :
query 3' GGACGAUUCUAUGUUGCAUAAU 5'
query=novel_mir_102, target=R03G_05791, score=2, range=292-313,
strand=1
target 5' CCUGCUAAGAUACAACAUAUUUA 3'
: : : : : : : : : : : : : : : : : :
query 3' GGACGAUUCUAUGUUGCAUAAU 5'
query=novel_mir_102, target=R03G_00560, score=4, range=99-119,
strand=-1
target 5' CCUACUAAUAUACAACG-AUUA 3'
: : : : : : : : : : : : : : : : : :
query 3' GGACGAUUCUAUGUUGCAUAAU 5'
query=novel_mir_117, target=R03G_00202, score=0, range=681-701,
strand=1

```

```
target 5' CUUCUAUCAUCCCUGCCAUUA 3'
::::::::::::::::::
query 3' GAAGAUAGUAGGGACGGUAAU 5'
query=novel_mir_117, target=R03G_01267, score=4, range=170-190,
strand=1
target 5' GUUCUGUUAUCUCUGUCAUUA 3'
::::::::::::::::::
query 3' GAAGAUAGUAGGGACGGUAAU 5'
query=novel_mir_117, target=R03G_01175, score=4, range=455-475,
strand=1
target 5' CUUCUGUCAUCCUGCCUUUG 3'
:::::::::::::::::: ..
query 3' GAAGAUAGUAGGGACGGUAAU 5'
query=novel_mir_117, target=R03G_16685, score=4, range=95-115,
strand=1
target 5' CUUCUAUGAUUCCUGCUGUUA 3'
:::::: ::::::::::::::
query 3' GAAGAUAGUAGGGACGGUAAU 5'
query=novel_mir_117, target=R03G_04995, score=4, range=611-631,
strand=1
target 5' AUUAUAUCCUCCUGCCAUUA 3'
:: :::: ::::::::::::::
query 3' GAAGAUAGUAGGGACGGUAAU 5'
query=novel_mir_117, target=R03G_13503, score=4, range=1077-1097,
strand=-1
target 5' GUUGUAUCAUUUCUGCCAUUA 3'
:: ::::::::::::::
query 3' GAAGAUAGUAGGGACGGUAAU 5'
query=novel_mir_117, target=R03G_13355, score=4, range=1077-1098,
strand=-1
target 5' CUUCUUUACAUCUUGUCAUUA 3'
::::: : ::::::::::::::
query 3' GAAGAUAGUAGGGACGGUAAU 5'
query=novel_mir_43, target=R03G_13867, score=0, range=1302-1323,
strand=1
target 5' AAAGCAAUAGAAACGAAAAGA 3'
::::::::::::::::::
query 3' UUUCGUUUUAUCUUUGCUUUUCU 5'
query=novel_mir_43, target=R03G_17326, score=0, range=1219-1240,
strand=1
target 5' AAAGCAAUAGAAACGAAAAGA 3'
::::::::::::::::::
query 3' UUUCGUUUUAUCUUUGCUUUUCU 5'
query=novel_mir_43, target=R03G_15585, score=0, range=1386-1407,
strand=1
```

```

target 5' AAAGCAAUAGAAACGAAAAGA 3'
::::::::::::::::::::::::::
query 3' UUUCGUUUUAUCUUUGCUUUUCU 5'
query=novel_mir_43, target=R03G_01329, score=0, range=234-255,
strand=1
target 5' AAAGCAAUAGAAACGAAAAGA 3'
::::::::::::::::::::::::::
query 3' UUUCGUUUUAUCUUUGCUUUUCU 5'
query=novel_mir_43, target=R03G_06442, score=0.5, range=2043-2064
strand=1
target 5' AAGGCAAUAGAAACGAAAAGA 3'
::::::::::::::::::::::::::
query 3' UUUCGUUUUAUCUUUGCUUUUCU 5'
query=novel_mir_43, target=R03G_02691, score=0.5, range=4875-4896
strand=1
target 5' AAGGCAAUAGAAACGAAAAGA 3'
::::::::::::::::::::::::::
query 3' UUUCGUUUUAUCUUUGCUUUUCU 5'
query=novel_mir_43, target=R03G_09965, score=0.5, range=1386-1407
strand=1
target 5' AAGGCAAUAGAAACGAAAAGA 3'
::::::::::::::::::::::::::
query 3' UUUCGUUUUAUCUUUGCUUUUCU 5'
query=novel_mir_43, target=R03G_13920, score=0.5, range=1386-1407
strand=1
target 5' AAGGCAAUAGAAACGAAAAGA 3'
::::::::::::::::::::::::::
query 3' UUUCGUUUUAUCUUUGCUUUUCU 5'
query=novel_mir_43, target=R03G_03547, score=0.5, range=1386-1407
strand=1
target 5' AAGGCAAUAGAAACGAAAAGA 3'
::::::::::::::::::::::::::
query 3' UUUCGUUUUAUCUUUGCUUUUCU 5'
query=novel_mir_43, target=R03G_02959, score=0.5, range=1386-1407
strand=1
target 5' AAGGCAAUAGAAACGAAAAGA 3'
::::::::::::::::::::::::::
query 3' UUUCGUUUUAUCUUUGCUUUUCU 5'
query=novel_mir_43, target=R03G_06427, score=0.5, range=978-999,
strand=1
target 5' AAGGCAAUAGAAACGAAAAGA 3'
::::::::::::::::::::::::::
query 3' UUUCGUUUUAUCUUUGCUUUUCU 5'
query=novel_mir_43, target=R03G_06428, score=0.5, range=480-501,
strand=1

```



target 5' AAGGCAAAUAGAAACGAAAAGA 3'  
:::~::~  
query 3' UUUCGUUUUAUCUUUGCUUUUCU 5'  
query=novel\_mir\_43, target=R03G\_04114, score=0.5, range=1386-1407  
strand=1  
target 5' AAGGCAAAUAGAAACGAAAAGA 3'  
:::~::~  
query 3' UUUCGUUUUAUCUUUGCUUUUCU 5'  
query=novel\_mir\_43, target=R03G\_02221, score=0.5, range=1308-1329  
strand=1  
target 5' AAGGCAAAUAGAAACGAAAAGA 3'  
:::~::~  
query 3' UUUCGUUUUAUCUUUGCUUUUCU 5'  
query=novel\_mir\_43, target=R03G\_05272, score=0.5, range=1386-1407  
strand=1  
target 5' AAGGCAAAUAGAAACGAAAAGA 3'  
:::~::~  
query 3' UUUCGUUUUAUCUUUGCUUUUCU 5'  
query=novel\_mir\_43, target=R03G\_08608, score=0.5, range=1902-1923  
strand=1  
target 5' AAGGCAAAUAGAAACGAAAAGA 3'  
:::~::~  
query 3' UUUCGUUUUAUCUUUGCUUUUCU 5'  
query=novel\_mir\_43, target=R03G\_05617, score=0.5, range=1386-1407  
strand=1  
target 5' AAGGCAAAUAGAAACGAAAAGA 3'  
:::~::~  
query 3' UUUCGUUUUAUCUUUGCUUUUCU 5'  
query=novel\_mir\_43, target=R03G\_11234, score=0.5, range=1386-1407  
strand=1  
target 5' AAGGCAAAUAGAAACGAAAAGA 3'  
:::~::~  
query 3' UUUCGUUUUAUCUUUGCUUUUCU 5'  
query=novel\_mir\_43, target=R03G\_07036, score=0.5, range=588-609,  
strand=1  
target 5' AAGGCAAAUAGAAACGAAAAGA 3'  
:::~::~  
query 3' UUUCGUUUUAUCUUUGCUUUUCU 5'  
query=novel\_mir\_43, target=R03G\_01615, score=2, range=939-960,  
strand=1  
target 5' AAAGCAAAUAGAAACGAAUAGA 3'  
:~::~  
query 3' UUUCGUUUUAUCUUUGCUUUUCU 5'  
query=novel\_mir\_43, target=R03G\_17371, score=2.5, range=1386-1407  
strand=1

```

target 5' AAGGCAAAUAGAAUCGAAAAGA 3'
:::.....:
query 3' UUUCGUUUUAUCUUUGCUUUUCU 5'
query=novel_mir_43, target=R03G_15250, score=2.5, range=1386-1407
strand=1
target 5' AAGGCAAAUAGAAUCGAAAAGA 3'
:::.....:
query 3' UUUCGUUUUAUCUUUGCUUUUCU 5'
query=novel_mir_43, target=R03G_17083, score=3, range=1821-1843,
strand=1
target 5' AAAGCAAAAAGAAACAGAAAAGA 3'
:.....:
query 3' UUUCGUUUUAUCUUUG-CUUUUCU 5'
query=novel_mir_43, target=R03G_14388, score=3.5, range=229-250,
strand=1
target 5' GCAGCAAAAAGAAAUGAAAAGA 3'
. :.....:
query 3' UUUCGUUUUAUCUUUGCUUUUCU 5'
query=novel_mir_43, target=R03G_14100, score=4, range=181-202,
strand=1
target 5' AAAGAAGAUAGAAAUGAAGAGG 3'
:::: :.....:
query 3' UUUCGUUUUAUCUUUGCUUUUCU 5'
query=novel_mir_43, target=R03G_12746, score=4, range=19-40, stra
target 5' AAAGUGAAAGGAAACGAAAAGU 3'
:.....: :.....:
query 3' UUUCGUUUUAUCUUUGCUUUUCU 5'
query=novel_mir_43, target=R03G_14917, score=4, range=2187-2207,
strand=1
target 5' AGAGUAAAUAGAAA-GAAAAGA 3'
:::: :.....:
query 3' UUUCGUUUUAUCUUUGCUUUUCU 5'
query=novel_mir_43, target=R03G_10253, score=4, range=724-744,
strand=1
target 5' AAGACAAAUAGAAA-GAAAAGG 3'
:: :.....:
query 3' UUUCGUUUUAUCUUUGCUUUUCU 5'
query=novel_mir_43, target=R03G_11015, score=4, range=780-801,
strand=1
target 5' AAAACAAAGAGAAAAGAAAAGA 3'
::: ::: :.....:
query 3' UUUCGUUUUAUCUUUGCUUUUCU 5'
query=novel_mir_43, target=R03G_07831, score=4, range=351-371,
strand=1
target 5' AAAGGAAA-AGAGACGAAAGGA 3'

```

```
:::: :: : ::::::::::::::
query 3' UUUCGUUUUAUCUUUGCUUUUCU 5'
query=novel_mir_43, target=R03G_05455, score=4, range=42-62, stra
target 5' AAAACAAUUA-AAACGAAAAGA 3'
::: :: : : ::::::::::::::
query 3' UUUCGUUUUAUCUUUGCUUUUCU 5'
query=novel_mir_43, target=R03G_12579, score=4, range=34-56, stra
target 5' AAGGCAGUAAGAGACGAGAAGA 3'
:::::::::: : ::::::::::::::
query 3' UUUCGUUUA-UCUUUGCUUUUCU 5'
query=novel_mir_97, target=R03G_07871, score=1, range=828-849,
strand=1
target 5' CCAAUGCAGCAAACUUUGGCA 3'
: ::::::::::::::::::::
query 3' GCGUUACGUCGUUUGAAACCGU 5'
query=novel_mir_121, target=R03G_05038, score=4, range=668-688,
strand=-1
target 5' AUACAGUAAUUUCUCC-UUCCA 3'
::::: :::::::::::::: : ::::
query 3' UAUGUAAUUAAGAGGCGAGGU 5'
query=novel_mir_121, target=R03G_11852, score=4, range=960-980,
strand=-1
target 5' GUA-AUUGCUUUCUCCGCUCUA 3'
.: : : : : :::::::::::::::
query 3' UAUGUAAUUAAGAGGCGAGGU 5'
query=novel_mir_42, target=R03G_08820, score=1, range=539-558,
strand=1
target 5' GACUUACAAAGGGCAACCAA 3'
::::::::::: ::::::::::::::
query 3' CUGAAUGUUUCUCGUUGGUU 5'
query=novel_mir_42, target=R03G_12738, score=2.5, range=90-109,
strand=1
target 5' GGUUGAUAAAGAGCAACCAA 3'
:..: : ::::::::::::::::::::
query 3' CUGAAUGUUUCUCGUUGGUU 5'
query=novel_mir_42, target=R03G_11190, score=3, range=129-149,
strand=1
target 5' GACCUUACAGAGAGCAGCCAA 3'
:: : ::::::::::::::::::::
query 3' CU-GAAUGUUUCUCGUUGGUU 5'
query=novel_mir_42, target=R03G_07376, score=3, range=1573-1591,
strand=1
target 5' GAAUUA-GAAGAGCAACCAA 3'
:: : : : : ::::::::::::::
query 3' CUGAAUGUUUCUCGUUGGUU 5'
```

query=novel\_mir\_42, target=R03G\_11625, score=3.5, range=703-722,  
strand=1  
target 5' UAUUUACAAGGAGCGACCAA 3'  
:.....:.....  
query 3' CUGAAUGUUUCUCGUUGGUU 5'  
query=novel\_mir\_42, target=R03G\_04754, score=3.5, range=2401-2420  
strand=1  
target 5' GACUUGAAAGGAGCAGCCAA 3'  
:..... :.....  
query 3' CUGAAUGUUUCUCGUUGGUU 5'  
query=novel\_mir\_42, target=R03G\_03372, score=3.5, range=160-178,  
strand=1  
target 5' UAC-UAUAAAGAGCAAUCAA 3'  
:: :.....:.....  
query 3' CUGAAUGUUUCUCGUUGGUU 5'  
query=novel\_mir\_42, target=R03G\_10833, score=3.5, range=495-514,  
strand=-1  
target 5' GACUUGCCGAGAGCAACCAA 3'  
:.....: :.....:.....  
query 3' CUGAAUGUUUCUCGUUGGUU 5'  
query=novel\_mir\_42, target=R03G\_15043, score=3.5, range=62-80,  
strand=-1  
target 5' GA-UGGCAAAGGGCAACCAA 3'  
:: : :.....:.....:.....  
query 3' CUGAAUGUUUCUCGUUGGUU 5'  
query=novel\_mir\_42, target=R03G\_16847, score=4, range=753-772,  
strand=1  
target 5' CAUUUAUGAAGAGCAACCAU 3'  
:.....:.....:.....  
query 3' CUGAAUGUUUCUCGUUGGUU 5'  
query=novel\_mir\_42, target=R03G\_08937, score=4, range=182-201,  
strand=1  
target 5' AAUGUAUGAAGAGCAACCAA 3'  
:. :.....:.....:.....  
query 3' CUGAAUGUUUCUCGUUGGUU 5'  
query=novel\_mir\_42, target=R03G\_07635, score=4, range=23-43, stra  
target 5' CAUUUGAUAAAGAGCAAUCAA 3'  
:..: :.....:.....:.....  
query 3' CUGAA-UGUUUCUCGUUGGUU 5'  
query=novel\_mir\_42, target=R03G\_06920, score=4, range=385-404,  
strand=1  
target 5' GGGAUGAAAAGAGCAACCAA 3'  
:. :. :.....:.....:.....  
query 3' CUGAAUGUUUCUCGUUGGUU 5'  
query=novel\_mir\_42, target=R03G\_08884, score=4, range=1142-1161,



query=novel\_mir\_18, target=R03G\_17067, score=4, range=1073-1093,  
strand=1  
target 5' CUCAUGUCUCGGUUGGCUCCG 3'  
::: .....  
query 3' UAGU-UAGAGUCAACCGAGGU 5'

query=novel\_mir\_18, target=R03G\_03157, score=4, range=3129-3147,  
strand=1  
target 5' AUCAA-CUUAUUUGGCUCCA 3'  
:::: :.: :  
query 3' UAGUUAGAGUCAACCGAGGU 5'

query=novel\_mir\_95, target=R03G\_05640, score=1, range=656-677,  
strand=-1  
target 5' AUCAUGCCACUAUCCUUCAUCC 3'  
:::::::::::  
query 3' UAGUACGGUGAUAGGAAGUAGU 5'

query=novel\_mir\_95, target=R03G\_16742, score=1, range=761-782,  
strand=-1  
target 5' AUCAUGCCACUAUCCUUCAUCC 3'  
:::::::::::  
query 3' UAGUACGGUGAUAGGAAGUAGU 5'

query=novel\_mir\_95, target=R03G\_02824, score=1, range=761-782,  
strand=-1  
target 5' AUCAUGCCACUAUCCUUCAUCC 3'  
:::::::::::  
query 3' UAGUACGGUGAUAGGAAGUAGU 5'

query=novel\_mir\_95, target=R03G\_17416, score=1, range=761-782,  
strand=-1  
target 5' AUCAUGCCACUAUCCUUCAUCC 3'  
:::::::::::  
query 3' UAGUACGGUGAUAGGAAGUAGU 5'

query=novel\_mir\_95, target=R03G\_17291, score=1, range=761-782,  
strand=-1  
target 5' AUCAUGCCACUAUCCUUCAUCC 3'  
:::::::::::  
query 3' UAGUACGGUGAUAGGAAGUAGU 5'

query=novel\_mir\_95, target=R03G\_13714, score=1, range=761-782,  
strand=-1  
target 5' AUCAUGCCACUAUCCUUCAUCC 3'  
:::::::::::  
query 3' UAGUACGGUGAUAGGAAGUAGU 5'

query=novel\_mir\_95, target=R03G\_16372, score=1, range=761-782,  
strand=-1  
target 5' AUCAUGCCACUAUCCUUCAUCC 3'  
:::::::::::  
query 3' UAGUACGGUGAUAGGAAGUAGU 5'









query=novel\_mir\_95, target=R03G\_15271, score=3.5, range=761-782,  
strand=-1  
target 5' AUCAUGC UAAUAUCCUUCAUCC 3'  
.....: .....

query 3' UAGUACGGUGAUAGGAAGUAGU 5'  
query=novel\_mir\_95, target=R03G\_16725, score=3.5, range=503-524,  
strand=-1  
target 5' AUCAUGC UAAUAUCCUUCAUCC 3'  
.....: .....

query 3' UAGUACGGUGAUAGGAAGUAGU 5'  
query=novel\_mir\_95, target=R03G\_10402, score=4, range=406-426,  
strand=1  
target 5' GAUAU-UUACUAUCCUUCAUCA 3'  
. .:: .....

query 3' UAGUACGGUGAUAGGAAGUAGU 5'  
query=novel\_mir\_95, target=R03G\_03979, score=4, range=612-632,  
strand=1  
target 5' AGCA-GCCACUAUACUUCAUCA 3'  
: :: .....

query 3' UAGUACGGUGAUAGGAAGUAGU 5'  
query=novel\_mir\_95, target=R03G\_15434, score=4, range=3690-3710,  
strand=-1  
target 5' UUCGUGUCACUAUCC-UCAUCA 3'  
.....: .....

query 3' UAGUACGGUGAUAGGAAGUAGU 5'  
query=novel\_mir\_95, target=R03G\_00202, score=4, range=114-134,  
strand=-1  
target 5' AUCAUUCUGCUAUCC-UCAUCA 3'  
.....: .....

query 3' UAGUACGGUGAUAGGAAGUAGU 5'  
query=novel\_mir\_13, target=R03G\_09594, score=0, range=47-66, stra  
target 5' UCCUCUCUUACCGAACGUA 3'  
.....: .....

query 3' AGGAGAGAAUGGACUUGCAU 5'  
query=novel\_mir\_13, target=R03G\_11961, score=2, range=552-571,  
strand=1  
target 5' UCCUCUCUUACCGAACGUA 3'  
.....: .....

query 3' AGGAGAGAAUGGACUUGCAU 5'  
query=novel\_mir\_13, target=R03G\_06107, score=4, range=1171-1190,  
strand=1  
target 5' UCUUCUCUCACCGGACGUG 3'  
.....: .....

query 3' AGGAGAGAAUGGACUUGCAU 5'  
query=novel\_mir\_13, target=R03G\_06102, score=4, range=177-196,

strand=1  
target 5' UCAGCUCUUGUCUGAACGUA 3'  
:: :::::::::::::::::::::  
query 3' AGGAGAGAAUGGACUUGCAU 5'  
query=novel\_mir\_13, target=R03G\_13655, score=4, range=433-452,  
strand=-1  
target 5' UUAUCUAUUUUCUGAACGUG 3'  
:. ::: :::::::::::::::::::::  
query 3' AGGAGAGAAUGGACUUGCAU 5'  
query=novel\_mir\_13, target=R03G\_06359, score=4, range=772-790,  
strand=-1  
target 5' UUUUCUC-UACUUGAACGUA 3'  
..... :::::::::::::::::::::  
query 3' AGGAGAGAAUGGACUUGCAU 5'  
query=novel\_mir\_19, target=R03G\_06718, score=0, range=107-128,  
strand=1  
target 5' UAGUACUCGAUCCUACAGACCA 3'  
:::::::::::::::::::  
query 3' AUCAUGAGCUAGGAUGUCUGGU 5'  
query=novel\_mir\_124, target=R03G\_01198, score=0, range=319-338,  
strand=1  
target 5' CAACAACAGCAACAAGAGCA 3'  
:::::::::::::::::::  
query 3' GUUGUUGUCGUUGUUCUCGU 5'  
query=novel\_mir\_124, target=R03G\_13711, score=0, range=319-338,  
strand=1  
target 5' CAACAACAGCAACAAGAGCA 3'  
:::::::::::::::::::  
query 3' GUUGUUGUCGUUGUUCUCGU 5'  
query=novel\_mir\_124, target=R03G\_16959, score=0, range=406-425,  
strand=1  
target 5' CAACAACAGCAACAAGAGCA 3'  
:::::::::::::::::::  
query 3' GUUGUUGUCGUUGUUCUCGU 5'  
query=novel\_mir\_124, target=R03G\_05910, score=0, range=319-338,  
strand=1  
target 5' CAACAACAGCAACAAGAGCA 3'  
:::::::::::::::::::  
query 3' GUUGUUGUCGUUGUUCUCGU 5'  
query=novel\_mir\_124, target=R03G\_05955, score=0, range=319-338,  
strand=1  
target 5' CAACAACAGCAACAAGAGCA 3'  
:::::::::::::::::::  
query 3' GUUGUUGUCGUUGUUCUCGU 5'  
query=novel\_mir\_124, target=R03G\_12192, score=0, range=319-338,

strand=1  
target 5' CAACAACAGCAACAAGAGCA 3'  
::::::::::::::::::::::::::  
query 3' GUUGUUGUCGUUGUUCUCGU 5'  
query=novel\_mir\_124, target=R03G\_17242, score=0, range=319-338,  
strand=1  
target 5' CAACAACAGCAACAAGAGCA 3'  
::::::::::::::::::::::::::  
query 3' GUUGUUGUCGUUGUUCUCGU 5'  
query=novel\_mir\_124, target=R03G\_09184, score=0, range=31-50, str  
target 5' CAACAACAGCAACAAGAGCA 3'  
::::::::::::::::::::::::::  
query 3' GUUGUUGUCGUUGUUCUCGU 5'  
query=novel\_mir\_124, target=R03G\_07115, score=0, range=280-299,  
strand=1  
target 5' CAACAACAGCAACAAGAGCA 3'  
::::::::::::::::::::::::::  
query 3' GUUGUUGUCGUUGUUCUCGU 5'  
query=novel\_mir\_124, target=R03G\_10737, score=0, range=319-338,  
strand=1  
target 5' CAACAACAGCAACAAGAGCA 3'  
::::::::::::::::::::::::::  
query 3' GUUGUUGUCGUUGUUCUCGU 5'  
query=novel\_mir\_124, target=R03G\_00259, score=0, range=319-338,  
strand=1  
target 5' CAACAACAGCAACAAGAGCA 3'  
::::::::::::::::::::::::::  
query 3' GUUGUUGUCGUUGUUCUCGU 5'  
query=novel\_mir\_124, target=R03G\_15256, score=0, range=319-338,  
strand=1  
target 5' CAACAACAGCAACAAGAGCA 3'  
::::::::::::::::::::::::::  
query 3' GUUGUUGUCGUUGUUCUCGU 5'  
query=novel\_mir\_124, target=R03G\_02231, score=0, range=319-338,  
strand=1  
target 5' CAACAACAGCAACAAGAGCA 3'  
::::::::::::::::::::::::::  
query 3' GUUGUUGUCGUUGUUCUCGU 5'  
query=novel\_mir\_124, target=R03G\_02827, score=0, range=319-338,  
strand=1  
target 5' CAACAACAGCAACAAGAGCA 3'  
::::::::::::::::::::::::::  
query 3' GUUGUUGUCGUUGUUCUCGU 5'  
query=novel\_mir\_124, target=R03G\_16127, score=0, range=319-338,  
strand=1

```

target 5' CAACAACAGCAACAAGAGCA 3'
::::::::::::::::::::::::::
query 3' GUUGUUGUCGUUGUUCUCGU 5'
query=novel_mir_124, target=R03G_10048, score=0, range=319-338,
strand=1
target 5' CAACAACAGCAACAAGAGCA 3'
::::::::::::::::::::::::::
query 3' GUUGUUGUCGUUGUUCUCGU 5'
query=novel_mir_124, target=R03G_13072, score=0.5, range=277-296,
strand=1
target 5' CAGCAACAGCAACAAGAGCA 3'
::::::::::::::::::::::::::
query 3' GUUGUUGUCGUUGUUCUCGU 5'
query=novel_mir_124, target=R03G_02782, score=1, range=475-494,
strand=1
target 5' CAACAACAGCAGCAAGAGCA 3'
::::::::::::::::::::::::::
query 3' GUUGUUGUCGUUGUUCUCGU 5'
query=novel_mir_124, target=R03G_16965, score=1, range=1171-1190,
strand=1
target 5' CAACAAGAGCAACAAGAGCA 3'
:::::: ::::::::::::::::::::
query 3' GUUGUUGUCGUUGUUCUCGU 5'
query=novel_mir_124, target=R03G_10399, score=2, range=421-440,
strand=1
target 5' CAGCAGCAGCAACAAGAGCC 3'
::::::::::::::::::::::::::
query 3' GUUGUUGUCGUUGUUCUCGU 5'
query=novel_mir_124, target=R03G_09793, score=2, range=436-455,
strand=1
target 5' CAACAACAGCAACAACAGCA 3'
:::::::::::::::::::: ::::
query 3' GUUGUUGUCGUUGUUCUCGU 5'
query=novel_mir_124, target=R03G_11219, score=2, range=1765-1784,
strand=1
target 5' CAACAACAGCAACAACAGCA 3'
:::::::::::::::::::: ::::
query 3' GUUGUUGUCGUUGUUCUCGU 5'
query=novel_mir_124, target=R03G_09085, score=2, range=757-776,
strand=1
target 5' CAACAACAGCAACAACAGCA 3'
:::::::::::::::::::: ::::
query 3' GUUGUUGUCGUUGUUCUCGU 5'
query=novel_mir_124, target=R03G_05642, score=2, range=1270-1289,
strand=1

```



target 5' CAACAACAGCAACAACAGCA 3'  
 :::::::::::::::::::::: ::::  
 query 3' GUUGUUGUCGUUGUUCUCGU 5'  
 query=novel\_mir\_124, target=R03G\_02436, score=2, range=694-713,  
 strand=1  
 target 5' CAACAACAGCAACAACAGCA 3'  
 :::::::::::::::::::::: ::::  
 query 3' GUUGUUGUCGUUGUUCUCGU 5'  
 query=novel\_mir\_124, target=R03G\_09037, score=2, range=745-764,  
 strand=1  
 target 5' CAACAACAGCAACAACAGCA 3'  
 :::::::::::::::::::::: ::::  
 query 3' GUUGUUGUCGUUGUUCUCGU 5'  
 query=novel\_mir\_124, target=R03G\_05386, score=2, range=979-998,  
 strand=1  
 target 5' CAACAACAGCAACAACAGCA 3'  
 :::::::::::::::::::::: ::::  
 query 3' GUUGUUGUCGUUGUUCUCGU 5'  
 query=novel\_mir\_124, target=R03G\_04916, score=2, range=465-484,  
 strand=1  
 target 5' CAACAACAGCAACAACAGCA 3'  
 :::::::::::::::::::::: ::::  
 query 3' GUUGUUGUCGUUGUUCUCGU 5'  
 query=novel\_mir\_124, target=R03G\_13165, score=2, range=585-604,  
 strand=-1  
 target 5' CAACAACAGUAGCAAGAGCA 3'  
 :::::::::::::::::::::: ::::  
 query 3' GUUGUUGUCGUUGUUCUCGU 5'  
 query=novel\_mir\_124, target=R03G\_09070, score=2, range=9-28, str  
 target 5' CAACAACAGCAACAACAGCA 3'  
 :::::::::::::::::::::: ::::  
 query 3' GUUGUUGUCGUUGUUCUCGU 5'  
 query=novel\_mir\_124, target=R03G\_01909, score=2.5, range=502-521,  
 strand=1  
 target 5' CAGCAACGGCAGCAAGAGCA 3'  
 :::::::::::::::::::::: ::::  
 query 3' GUUGUUGUCGUUGUUCUCGU 5'  
 query=novel\_mir\_124, target=R03G\_07615, score=2.5, range=592-611,  
 strand=1  
 target 5' CAACAGCAGCAACAACAGCA 3'  
 :::::::::::::::::::::: ::::  
 query 3' GUUGUUGUCGUUGUUCUCGU 5'  
 query=novel\_mir\_124, target=R03G\_02100, score=2.5, range=76-95,  
 strand=1  
 target 5' CAGCAACAGCAACAACAGCA 3'

..... :  
query 3' GUUGUUGUCGUUGUUCUCGU 5'  
query=novel\_mir\_124, target=R03G\_07939, score=2.5, range=1396-141  
strand=1  
target 5' CAGCAACAGCAACAACAGCA 3'  
..... :  
query 3' GUUGUUGUCGUUGUUCUCGU 5'  
query=novel\_mir\_124, target=R03G\_02027, score=2.5, range=616-635,  
strand=1  
target 5' CAGCAACAGCAACAACAGCA 3'  
..... :  
query 3' GUUGUUGUCGUUGUUCUCGU 5'  
query=novel\_mir\_124, target=R03G\_03857, score=2.5, range=409-428,  
strand=1  
target 5' CAGCAACAGCAACAACAGCA 3'  
..... :  
query 3' GUUGUUGUCGUUGUUCUCGU 5'  
query=novel\_mir\_124, target=R03G\_14401, score=2.5, range=634-653,  
strand=1  
target 5' CAGCAACAGCAACAACAGCA 3'  
..... :  
query 3' GUUGUUGUCGUUGUUCUCGU 5'  
query=novel\_mir\_124, target=R03G\_07798, score=2.5, range=775-794,  
strand=1  
target 5' CAGCAACAGCAACAACAGCA 3'  
..... :  
query 3' GUUGUUGUCGUUGUUCUCGU 5'  
query=novel\_mir\_124, target=R03G\_15592, score=2.5, range=539-558,  
strand=1  
target 5' CAACAGCAGCAACAACAGCA 3'  
..... :  
query 3' GUUGUUGUCGUUGUUCUCGU 5'  
query=novel\_mir\_124, target=R03G\_08675, score=2.5, range=214-233,  
strand=1  
target 5' CAGCAACAGCAACAACAGCA 3'  
..... :  
query 3' GUUGUUGUCGUUGUUCUCGU 5'  
query=novel\_mir\_124, target=R03G\_07091, score=2.5, range=589-608,  
strand=1  
target 5' CAACAGCAGCAACAACAGCA 3'  
..... :  
query 3' GUUGUUGUCGUUGUUCUCGU 5'  
query=novel\_mir\_124, target=R03G\_00007, score=2.5, range=634-653,  
strand=1  
target 5' CAGCAACAGCAACAACAGCA 3'



```
..... :
query 3' GUUGUUGUCGUUGUUCUCGU 5'
query=novel_mir_124, target=R03G_05906, score=2.5, range=286-305,
strand=1
target 5' CAGCAACAGCAACAACAGCA 3'
..... :
query 3' GUUGUUGUCGUUGUUCUCGU 5'
query=novel_mir_124, target=R03G_01671, score=2.5, range=349-368,
strand=1
target 5' CAGCAACAGCAACAACAGCA 3'
..... :
query 3' GUUGUUGUCGUUGUUCUCGU 5'
query=novel_mir_124, target=R03G_00271, score=2.5, range=494-513,
strand=1
target 5' CAACGACAGCAACAACAGCA 3'
..... :
query 3' GUUGUUGUCGUUGUUCUCGU 5'
query=novel_mir_124, target=R03G_01453, score=2.5, range=461-480,
strand=1
target 5' UACCAUCAGCAACAAGAGCA 3'
.: : :
query 3' GUUGUUGUCGUUGUUCUCGU 5'
query=novel_mir_124, target=R03G_09085, score=2.5, range=781-800,
strand=1
target 5' CAACAGCAGCAACAACAGCA 3'
..... :
query 3' GUUGUUGUCGUUGUUCUCGU 5'
query=novel_mir_124, target=R03G_16959, score=2.5, range=547-566,
strand=1
target 5' CAGCAACAGCAACAACAGCA 3'
..... :
query 3' GUUGUUGUCGUUGUUCUCGU 5'
query=novel_mir_124, target=R03G_02252, score=2.5, range=349-369,
strand=1
target 5' CAACAGCAGCAACAAGAAGCA 3'
..... :
query 3' GUUGUUGUCGUUGUUC-UCGU 5'
query=novel_mir_124, target=R03G_06473, score=2.5, range=2605-262
strand=1
target 5' CAGCAACAGCAACAA-AGCA 3'
..... :
query 3' GUUGUUGUCGUUGUUCUCGU 5'
query=novel_mir_124, target=R03G_12353, score=2.5, range=1035-105
strand=-1
target 5' CAAU AACAGCACCAAGAGCA 3'
```

:::::::::: :::::  
query 3' GUUGUUGUCGUUGUUCUCGU 5'  
query=novel\_mir\_124, target=R03G\_02065, score=2.5, range=855-874,  
strand=-1  
target 5' CAGUGUCAGCAACAAGAGCA 3'  
::... :::::  
query 3' GUUGUUGUCGUUGUUCUCGU 5'  
query=novel\_mir\_124, target=R03G\_02337, score=2.5, range=1209-122  
strand=-1  
target 5' UGAUAUCAGCAACAAGAGCA 3'  
...: :::::  
query 3' GUUGUUGUCGUUGUUCUCGU 5'  
query=novel\_mir\_124, target=R03G\_09884, score=3, range=256-275,  
strand=1  
target 5' GAGCAGCAGCAGCAAGAGCA 3'  
:..... :::::  
query 3' GUUGUUGUCGUUGUUCUCGU 5'  
query=novel\_mir\_124, target=R03G\_12891, score=3, range=2584-2603,  
strand=1  
target 5' CAACAACAGCAACAGCAGCA 3'  
:..... :::::  
query 3' GUUGUUGUCGUUGUUCUCGU 5'  
query=novel\_mir\_124, target=R03G\_16618, score=3, range=2254-2273,  
strand=1  
target 5' CAACAACAGCAACAGCAGCA 3'  
:..... :::::  
query 3' GUUGUUGUCGUUGUUCUCGU 5'  
query=novel\_mir\_124, target=R03G\_00766, score=3, range=1378-1397,  
strand=1  
target 5' CAACAACAGCAGCAACAGCA 3'  
:..... :::::  
query 3' GUUGUUGUCGUUGUUCUCGU 5'  
query=novel\_mir\_124, target=R03G\_00949, score=3, range=1141-1160,  
strand=1  
target 5' CAACAACAGCAACAGCAGCA 3'  
:..... :::::  
query 3' GUUGUUGUCGUUGUUCUCGU 5'  
query=novel\_mir\_124, target=R03G\_10815, score=3, range=1978-1997,  
strand=1  
target 5' CAACAACAGCAGCAACAGCA 3'  
:..... :::::  
query 3' GUUGUUGUCGUUGUUCUCGU 5'  
query=novel\_mir\_124, target=R03G\_05396, score=3, range=1342-1361,  
strand=1  
target 5' CAACAACAGCAACAGCAGCA 3'

::::: :  
query 3' GUUGUUGUCGUUGUUCUCGU 5'  
query=novel\_mir\_124, target=R03G\_04228, score=3, range=415-434,  
strand=1  
target 5' CAACAACAGCAACAGCAGCA 3'  
::::: :  
query 3' GUUGUUGUCGUUGUUCUCGU 5'  
query=novel\_mir\_124, target=R03G\_03075, score=3, range=1756-1775,  
strand=1  
target 5' CAACAACAGCAACAGCAGCA 3'  
::::: :  
query 3' GUUGUUGUCGUUGUUCUCGU 5'  
query=novel\_mir\_124, target=R03G\_11135, score=3, range=535-554,  
strand=1  
target 5' CAACAACAGCAGCAAGAACA 3'  
::::: :  
query 3' GUUGUUGUCGUUGUUCUCGU 5'  
query=novel\_mir\_124, target=R03G\_10995, score=3, range=1423-1442,  
strand=1  
target 5' CAACAACAACAACGAGAGCA 3'  
::::: :  
query 3' GUUGUUGUCGUUGUUCUCGU 5'  
query=novel\_mir\_124, target=R03G\_08607, score=3, range=1429-1448,  
strand=1  
target 5' CAACAACAGCAACAACGGCA 3'  
::::: :  
query 3' GUUGUUGUCGUUGUUCUCGU 5'  
query=novel\_mir\_124, target=R03G\_10494, score=3, range=691-710,  
strand=1  
target 5' CAACAACAGCAACAGCAGCA 3'  
::::: :  
query 3' GUUGUUGUCGUUGUUCUCGU 5'  
query=novel\_mir\_124, target=R03G\_00162, score=3, range=7-26, str  
target 5' CAACAACAGCAGCAACAGCA 3'  
::::: :  
query 3' GUUGUUGUCGUUGUUCUCGU 5'  
query=novel\_mir\_124, target=R03G\_06665, score=3, range=718-737,  
strand=1  
target 5' CAACAACAGCAACAGCAGCA 3'  
::::: :  
query 3' GUUGUUGUCGUUGUUCUCGU 5'  
query=novel\_mir\_124, target=R03G\_01793, score=3, range=415-434,  
strand=1  
target 5' CAACAACAGCAGCAACAGCA 3'  
::::: :

query 3' GUUGUUGUCGUUGUUCUCGU 5'  
query=novel\_mir\_124, target=R03G\_08547, score=3, range=253-272,  
strand=1  
target 5' CAACAACAGCAGCAACAGCA 3'  
::::: :  
query 3' GUUGUUGUCGUUGUUCUCGU 5'  
query=novel\_mir\_124, target=R03G\_03212, score=3, range=208-227,  
strand=1  
target 5' CAACAACAGCAACAGCAGCA 3'  
::::: :  
query 3' GUUGUUGUCGUUGUUCUCGU 5'  
query=novel\_mir\_124, target=R03G\_16326, score=3, range=646-665,  
strand=1  
target 5' CAACAACAGCAGCAACAGCA 3'  
::::: :  
query 3' GUUGUUGUCGUUGUUCUCGU 5'  
query=novel\_mir\_124, target=R03G\_16962, score=3, range=433-452,  
strand=1  
target 5' CAACAACAGCAACAGCAGCA 3'  
::::: :  
query 3' GUUGUUGUCGUUGUUCUCGU 5'  
query=novel\_mir\_124, target=R03G\_02019, score=3, range=681-700,  
strand=1  
target 5' CAACAACGGCAACAACAGCA 3'  
::::: :  
query 3' GUUGUUGUCGUUGUUCUCGU 5'  
query=novel\_mir\_124, target=R03G\_15299, score=3, range=619-639,  
strand=1  
target 5' CAACAACAGCAACAAGAAGUA 3'  
::::: :  
query 3' GUUGUUGUCGUUGUUC-UCGU 5'  
query=novel\_mir\_124, target=R03G\_00219, score=3, range=1963-1982,  
strand=1  
target 5' CAGCAGCAGCAACAACAGCA 3'  
::::: :  
query 3' GUUGUUGUCGUUGUUCUCGU 5'  
query=novel\_mir\_124, target=R03G\_01100, score=3, range=676-695,  
strand=1  
target 5' CAGCGACAGCAACAAGAUCA 3'  
::::: :  
query 3' GUUGUUGUCGUUGUUCUCGU 5'  
query=novel\_mir\_124, target=R03G\_03713, score=3, range=377-396,  
strand=1  
target 5' CAGCAGCAGCAACAACAGCA 3'  
::::: :

query 3' GUUGUUGUCGUUGUUCUCGU 5'  
query=novel\_mir\_124, target=R03G\_15422, score=3, range=1248-1267,  
strand=1  
target 5' CAGCAGCAGCAACAACAGCA 3'  
..... : : : :  
query 3' GUUGUUGUCGUUGUUCUCGU 5'  
query=novel\_mir\_124, target=R03G\_12391, score=3, range=796-815,  
strand=1  
target 5' CAGCAGCAGCAACAACAGCA 3'  
..... : : : :  
query 3' GUUGUUGUCGUUGUUCUCGU 5'  
query=novel\_mir\_124, target=R03G\_09692, score=3, range=401-420,  
strand=1  
target 5' CAACUACAGCAACAACAGCA 3'  
:::: : : : : : : : :  
query 3' GUUGUUGUCGUUGUUCUCGU 5'  
query=novel\_mir\_124, target=R03G\_03495, score=3, range=21-39, str  
target 5' UAA-AGCAGCAGCAAGAGCA 3'  
. : : : : : : : : : : : : : :  
query 3' GUUGUUGUCGUUGUUCUCGU 5'  
query=novel\_mir\_124, target=R03G\_03203, score=3, range=256-275,  
strand=1  
target 5' CAACAUCAGCAACAACAGCA 3'  
..... : : : : : : : :  
query 3' GUUGUUGUCGUUGUUCUCGU 5'  
query=novel\_mir\_124, target=R03G\_04482, score=3, range=615-635,  
strand=1  
target 5' CAACAAACAGCAACAACAGCA 3'  
:::: : : : : : : : :  
query 3' GUUG-UUGUCGUUGUUCUCGU 5'  
query=novel\_mir\_124, target=R03G\_05396, score=3, range=1282-1301,  
strand=1  
target 5' CAACAACAGCAACAGCAGCA 3'  
..... : : : :  
query 3' GUUGUUGUCGUUGUUCUCGU 5'  
query=novel\_mir\_124, target=R03G\_02027, score=3, range=0-0, stran  
target 5' CAACAACAGCAACAGCAGCA 3'  
..... : : : :  
query 3' GUUGUUGUCGUUGUUCUCGU 5'  
query=novel\_mir\_124, target=R03G\_11504, score=3, range=213-232,  
strand=-1  
target 5' CAGCAGCAGCAGCAGGAGCA 3'  
..... : : : :  
query 3' GUUGUUGUCGUUGUUCUCGU 5'  
query=novel\_mir\_124, target=R03G\_02764, score=3, range=213-232,

strand=-1  
target 5' CAGCAGCAGCAGCAGGAGCA 3'  
.....  
query 3' GUUGUUGUCGUUGUUCUCGU 5'  
query=novel\_mir\_124, target=R03G\_07886, score=3, range=81-100,  
strand=-1  
target 5' CAGCAGCAGCAACAAGAGUU 3'  
.....  
query 3' GUUGUUGUCGUUGUUCUCGU 5'  
query=novel\_mir\_124, target=R03G\_15193, score=3, range=72-91,  
strand=-1  
target 5' CAACAACAGCAACAGCAGCA 3'  
..... :  
query 3' GUUGUUGUCGUUGUUCUCGU 5'  
query=novel\_mir\_124, target=R03G\_08022, score=3, range=195-214,  
strand=-1  
target 5' UAACAAUAGCAACAAUAGCA 3'  
. :  
query 3' GUUGUUGUCGUUGUUCUCGU 5'  
query=novel\_mir\_124, target=R03G\_06800, score=3, range=33-52,  
strand=-1  
target 5' CAGCAGCAGCAACAACAGCA 3'  
..... :  
query 3' GUUGUUGUCGUUGUUCUCGU 5'  
query=novel\_mir\_124, target=R03G\_15454, score=3, range=132-151,  
strand=-1  
target 5' CAGCAGCAGGAACAAGAGCA 3'  
..... :  
query 3' GUUGUUGUCGUUGUUCUCGU 5'  
query=novel\_mir\_124, target=R03G\_03860, score=3, range=321-340,  
strand=-1  
target 5' UUUCAGCAGCAACAAGAGCA 3'  
. :  
query 3' GUUGUUGUCGUUGUUCUCGU 5'  
query=novel\_mir\_124, target=R03G\_10385, score=3, range=33-52,  
strand=-1  
target 5' CAUGAACAGCAGCAAGAGCA 3'  
:: :  
query 3' GUUGUUGUCGUUGUUCUCGU 5'  
query=novel\_mir\_124, target=R03G\_06514, score=3, range=300-319,  
strand=-1  
target 5' CAACUAAAGCAAUAAGAGCA 3'  
:::: : :  
query 3' GUUGUUGUCGUUGUUCUCGU 5'  
query=novel\_mir\_124, target=R03G\_00092, score=3, range=689-707,

strand=-1  
target 5' CACCAACAGCAACAA-AGCA 3'  
:: :::::::::::::: ::::  
query 3' GUUGUUGUCGUUGUUCUCGU 5'  
query=novel\_mir\_124, target=R03G\_02199, score=3.5, range=543-562,  
strand=1  
target 5' AAGCAGUAGCAACAAGAGUA 3'  
:.....:.....:  
query 3' GUUGUUGUCGUUGUUCUCGU 5'  
query=novel\_mir\_124, target=R03G\_08882, score=3.5, range=4165-418  
strand=1  
target 5' CAGCAACAGCAGCAACAGCA 3'  
:.....:.....:  
query 3' GUUGUUGUCGUUGUUCUCGU 5'  
query=novel\_mir\_124, target=R03G\_08982, score=3.5, range=61-80,  
strand=1  
target 5' CAACAGCAGCAACAGCAGCA 3'  
:.....:.....:  
query 3' GUUGUUGUCGUUGUUCUCGU 5'  
query=novel\_mir\_124, target=R03G\_08704, score=3.5, range=2125-214  
strand=1  
target 5' CAGCAACAGCAGCAACAGCA 3'  
:.....:.....:  
query 3' GUUGUUGUCGUUGUUCUCGU 5'  
query=novel\_mir\_124, target=R03G\_15031, score=3.5, range=1327-134  
strand=1  
target 5' CAACAGCAGCAACAGCAGCA 3'  
:.....:.....:  
query 3' GUUGUUGUCGUUGUUCUCGU 5'  
query=novel\_mir\_124, target=R03G\_02642, score=3.5, range=793-812,  
strand=1  
target 5' CAACAGCAGCAGCAACAGCA 3'  
:.....:.....:  
query 3' GUUGUUGUCGUUGUUCUCGU 5'  
query=novel\_mir\_124, target=R03G\_01472, score=3.5, range=1192-121  
strand=1  
target 5' CAACAGCAGCAGCAACAGCA 3'  
:.....:.....:  
query 3' GUUGUUGUCGUUGUUCUCGU 5'  
query=novel\_mir\_124, target=R03G\_00544, score=3.5, range=1366-138  
strand=1  
target 5' CAACAGCAGCAGCAACAGCA 3'  
:.....:.....:  
query 3' GUUGUUGUCGUUGUUCUCGU 5'  
query=novel\_mir\_124, target=R03G\_04562, score=3.5, range=2197-221

strand=1  
target 5' CAGCAACAGCAGCAACAGCA 3'  
:::::::::::::::::: ::::  
query 3' GUUGUUGUCGUUGUUCUCGU 5'  
query=novel\_mir\_124, target=R03G\_11678, score=3.5, range=841-860,  
strand=1  
target 5' CAACAGCAGCAGCAACAGCA 3'  
:::::::::::::::::: ::::  
query 3' GUUGUUGUCGUUGUUCUCGU 5'  
query=novel\_mir\_124, target=R03G\_10935, score=3.5, range=1318-133  
strand=1  
target 5' CAACAGCAGCAGCAACAGCA 3'  
:::::::::::::::::: ::::  
query 3' GUUGUUGUCGUUGUUCUCGU 5'  
query=novel\_mir\_124, target=R03G\_10883, score=3.5, range=1759-177  
strand=1  
target 5' CAGCAACAGCAACAGCAGCA 3'  
::::::::::::::::::. ::::  
query 3' GUUGUUGUCGUUGUUCUCGU 5'  
query=novel\_mir\_124, target=R03G\_12746, score=3.5, range=472-491,  
strand=1  
target 5' CAACAGCAGCAACAGCAGCA 3'  
::::::::::::::::::. ::::  
query 3' GUUGUUGUCGUUGUUCUCGU 5'  
query=novel\_mir\_124, target=R03G\_07933, score=3.5, range=337-356,  
strand=1  
target 5' CAGCAACAGCAACAGCAGCA 3'  
::::::::::::::::::. ::::  
query 3' GUUGUUGUCGUUGUUCUCGU 5'  
query=novel\_mir\_124, target=R03G\_03907, score=3.5, range=185-204,  
strand=1  
target 5' CAGCAACAGCAAUAACAGCA 3'  
:::::::::::::::::: ::::  
query 3' GUUGUUGUCGUUGUUCUCGU 5'  
query=novel\_mir\_124, target=R03G\_00934, score=3.5, range=280-299,  
strand=1  
target 5' CAACAGCAGCAGCAACAGCA 3'  
:::::::::::::::::: ::::  
query 3' GUUGUUGUCGUUGUUCUCGU 5'  
query=novel\_mir\_124, target=R03G\_16901, score=3.5, range=355-374,  
strand=1  
target 5' CAGCAACAGCAACAGCAGCA 3'  
::::::::::::::::::. ::::  
query 3' GUUGUUGUCGUUGUUCUCGU 5'  
query=novel\_mir\_124, target=R03G\_16582, score=3.5, range=115-134,



strand=1  
target 5' CAACAGCAGCAGCAAGAACA 3'  
:~::~  
query 3' GUUGUUGUCGUUGUUCUCGU 5'  
query=novel\_mir\_124, target=R03G\_16917, score=3.5, range=361-380,  
strand=1  
target 5' CAGCAACAGCAACAGCAGCA 3'  
:~::~  
query 3' GUUGUUGUCGUUGUUCUCGU 5'  
query=novel\_mir\_124, target=R03G\_01717, score=3.5, range=352-371,  
strand=1  
target 5' CAGCAACAGCAACAGCAGCA 3'  
:~::~  
query 3' GUUGUUGUCGUUGUUCUCGU 5'  
query=novel\_mir\_124, target=R03G\_12011, score=3.5, range=349-368,  
strand=1  
target 5' CAGCAACAGCAACAGCAGCA 3'  
:~::~  
query 3' GUUGUUGUCGUUGUUCUCGU 5'  
query=novel\_mir\_124, target=R03G\_02817, score=3.5, range=358-377,  
strand=1  
target 5' CAGCAACAGCAACAGCAGCA 3'  
:~::~  
query 3' GUUGUUGUCGUUGUUCUCGU 5'  
query=novel\_mir\_124, target=R03G\_01458, score=3.5, range=165-184,  
strand=1  
target 5' UAACAACAGCAGCAAUAGCA 3'  
:~::~  
query 3' GUUGUUGUCGUUGUUCUCGU 5'  
query=novel\_mir\_124, target=R03G\_17433, score=3.5, range=346-365,  
strand=1  
target 5' CAGCAACAGCAACAGCAGCA 3'  
:~::~  
query 3' GUUGUUGUCGUUGUUCUCGU 5'  
query=novel\_mir\_124, target=R03G\_16743, score=3.5, range=292-311,  
strand=1  
target 5' CAACAGCAGCAGCAACAGCA 3'  
:~::~  
query 3' GUUGUUGUCGUUGUUCUCGU 5'  
query=novel\_mir\_124, target=R03G\_07692, score=3.5, range=283-302,  
strand=1  
target 5' CAGCAACAGCAACAGCAGCA 3'  
:~::~  
query 3' GUUGUUGUCGUUGUUCUCGU 5'  
query=novel\_mir\_124, target=R03G\_15879, score=3.5, range=268-287,

```

strand=1
target 5' CAGCAACAGCAACAGCAGCA 3'
::::::::::::::::::. ::::
query 3' GUUGUUGUCGUUGUUCUCGU 5'
query=novel_mir_124, target=R03G_10043, score=3.5, range=343-362,
strand=1
target 5' CAGCAACAGCAACAGCAGCA 3'
::::::::::::::::::. ::::
query 3' GUUGUUGUCGUUGUUCUCGU 5'
query=novel_mir_124, target=R03G_00600, score=3.5, range=259-278,
strand=1
target 5' CAGCAACAGCAACAGCAGCA 3'
::::::::::::::::::. ::::
query 3' GUUGUUGUCGUUGUUCUCGU 5'
query=novel_mir_124, target=R03G_16369, score=3.5, range=328-347,
strand=1
target 5' CAGCAACAGCAACAGCAGCA 3'
::::::::::::::::::. ::::
query 3' GUUGUUGUCGUUGUUCUCGU 5'
query=novel_mir_124, target=R03G_13452, score=3.5, range=322-341,
strand=1
target 5' CAACAGCAGCAGCAACAGCA 3'
::::::::::::::::::. ::::
query 3' GUUGUUGUCGUUGUUCUCGU 5'
query=novel_mir_124, target=R03G_15194, score=3.5, range=241-260,
strand=1
target 5' CAACAGCAGCAACAGCAGCA 3'
::::::::::::::::::. ::::
query 3' GUUGUUGUCGUUGUUCUCGU 5'
query=novel_mir_124, target=R03G_05730, score=3.5, range=657-676,
strand=1
target 5' CAACAGCAGCAACAGCAGCA 3'
::::::::::::::::::. ::::
query 3' GUUGUUGUCGUUGUUCUCGU 5'
query=novel_mir_124, target=R03G_17265, score=3.5, range=250-269,
strand=1
target 5' CAGCAACAGCAACAGCAGCA 3'
::::::::::::::::::. ::::
query 3' GUUGUUGUCGUUGUUCUCGU 5'
query=novel_mir_124, target=R03G_01192, score=3.5, range=286-305,
strand=1
target 5' CAGCAACAGCAACAGCAGCA 3'
::::::::::::::::::. ::::
query 3' GUUGUUGUCGUUGUUCUCGU 5'
query=novel_mir_124, target=R03G_06268, score=3.5, range=603-622,

```

strand=1  
target 5' CAACAGCAGCAGCAACAGCA 3'  
::::: ::::  
query 3' GUUGUUGUCGUUGUUCUCGU 5'  
query=novel\_mir\_124, target=R03G\_06121, score=3.5, range=721-740,  
strand=1  
target 5' CAGCAACAGCAGCAACAGCA 3'  
::::: ::::  
query 3' GUUGUUGUCGUUGUUCUCGU 5'  
query=novel\_mir\_124, target=R03G\_17244, score=3.5, range=346-365,  
strand=1  
target 5' CAGCAACAGCAACAGCAGCA 3'  
::::: ::::  
query 3' GUUGUUGUCGUUGUUCUCGU 5'  
query=novel\_mir\_124, target=R03G\_11543, score=3.5, range=349-368,  
strand=1  
target 5' CAGCAACAGCAACAGCAGCA 3'  
::::: ::::  
query 3' GUUGUUGUCGUUGUUCUCGU 5'  
query=novel\_mir\_124, target=R03G\_12078, score=3.5, range=49-68,  
strand=1  
target 5' CAGCAACAGCAACAGCAGCA 3'  
::::: ::::  
query 3' GUUGUUGUCGUUGUUCUCGU 5'  
query=novel\_mir\_124, target=R03G\_14553, score=3.5, range=349-368,  
strand=1  
target 5' CAGCAACAGCAACAGCAGCA 3'  
::::: ::::  
query 3' GUUGUUGUCGUUGUUCUCGU 5'  
query=novel\_mir\_124, target=R03G\_17460, score=3.5, range=373-392,  
strand=1  
target 5' CAGCAACAGCAACAGCAGCA 3'  
::::: ::::  
query 3' GUUGUUGUCGUUGUUCUCGU 5'  
query=novel\_mir\_124, target=R03G\_05347, score=3.5, range=349-368,  
strand=1  
target 5' CAGCAACAGCAACAGCAGCA 3'  
::::: ::::  
query 3' GUUGUUGUCGUUGUUCUCGU 5'  
query=novel\_mir\_124, target=R03G\_06612, score=3.5, range=1403-142  
strand=1  
target 5' CGACCACAGCAGCAGGAGCA 3'  
:::: : :::::  
query 3' GUUGUUGUCGUUGUUCUCGU 5'  
query=novel\_mir\_124, target=R03G\_04831, score=3.5, range=1676-169

```

strand=1
target 5' CAGCAGUAGCAACAACAGCA 3'
:.....:
query 3' GUUGUUGUCGUUGUUCUCGU 5'
query=novel_mir_124, target=R03G_07164, score=3.5, range=1960-197
strand=1
target 5' CAGCAACAGCAACAACAGCU 3'
:.....:
query 3' GUUGUUGUCGUUGUUCUCGU 5'
query=novel_mir_124, target=R03G_04640, score=3.5, range=289-308,
strand=1
target 5' GAACAGCAGCAACAACAGCA 3'
:.....:
query 3' GUUGUUGUCGUUGUUCUCGU 5'
query=novel_mir_124, target=R03G_08856, score=3.5, range=4299-431
strand=1
target 5' GAACAGUGAGCAACAAGAGCG 3'
:.....:
query 3' GUUGUUG-UCGUUGUUCUCGU 5'
query=novel_mir_124, target=R03G_00547, score=3.5, range=1838-185
strand=1
target 5' UGA-AACAGCAGCAAGAGCG 3'
...:.....:
query 3' GUUGUUGUCGUUGUUCUCGU 5'
query=novel_mir_124, target=R03G_15594, score=3.5, range=646-665,
strand=1
target 5' CAGCAAGAACAACAAGAGCA 3'
:.....:
query 3' GUUGUUGUCGUUGUUCUCGU 5'
query=novel_mir_124, target=R03G_06483, score=3.5, range=594-613,
strand=1
target 5' CAACGAAAGCAACAAUAGCA 3'
:.....:
query 3' GUUGUUGUCGUUGUUCUCGU 5'
query=novel_mir_124, target=R03G_06266, score=3.5, range=121-140,
strand=1
target 5' CAUCAGCAACAACAAGAGCA 3'
:::.....:
query 3' GUUGUUGUCGUUGUUCUCGU 5'
query=novel_mir_124, target=R03G_09480, score=3.5, range=2770-279
strand=1
target 5' CUACAAGCAGCAGCAAGAGCG 3'
: :.....:
query 3' GUUGUU-GUCGUUGUUCUCGU 5'
query=novel_mir_124, target=R03G_10676, score=3.5, range=1720-174

```

strand=1  
target 5' CUACAAGCAGCAGCAAGAGCG 3'  
: :::: :.....  
query 3' GUUGUU-GUCGUUGUUCUCGU 5'  
query=novel\_mir\_124, target=R03G\_13300, score=3.5, range=2770-279  
strand=1  
target 5' CUACAAGCAGCAGCAAGAGCG 3'  
: :::: :.....  
query 3' GUUGUU-GUCGUUGUUCUCGU 5'  
query=novel\_mir\_124, target=R03G\_00761, score=3.5, range=2056-207  
strand=1  
target 5' CAACAGCAGCAACAA-AGCC 3'  
:.....: : :  
query 3' GUUGUUGUCGUUGUUCUCGU 5'  
query=novel\_mir\_124, target=R03G\_00498, score=3.5, range=1288-130  
strand=1  
target 5' GAAGAGGAGCAACAAGAGCA 3'  
: : . :.....  
query 3' GUUGUUGUCGUUGUUCUCGU 5'  
query=novel\_mir\_124, target=R03G\_07615, score=3.5, range=688-707,  
strand=1  
target 5' CAGCAACAGCAACAGCAGCA 3'  
:.....: : : :  
query 3' GUUGUUGUCGUUGUUCUCGU 5'  
query=novel\_mir\_124, target=R03G\_10815, score=3.5, range=2548-256  
strand=1  
target 5' CAACAGCAGCAGCAACAGCA 3'  
:.....: : : :  
query 3' GUUGUUGUCGUUGUUCUCGU 5'  
query=novel\_mir\_124, target=R03G\_02642, score=3.5, range=478-497,  
strand=1  
target 5' CAACAGCAGCAACAGGAACA 3'  
:.....: : : :  
query 3' GUUGUUGUCGUUGUUCUCGU 5'  
query=novel\_mir\_124, target=R03G\_00544, score=3.5, range=2191-221  
strand=1  
target 5' CAGCAACAGCAACAGCAGCA 3'  
:.....: : : :  
query 3' GUUGUUGUCGUUGUUCUCGU 5'  
query=novel\_mir\_124, target=R03G\_07806, score=3.5, range=373-392,  
strand=1  
target 5' CAGCAACAGCAACAGCAGCA 3'  
:.....: : : :  
query 3' GUUGUUGUCGUUGUUCUCGU 5'  
query=novel\_mir\_124, target=R03G\_10494, score=3.5, range=622-641,

strand=1  
target 5' CAGCAACAGCAACAGCAGCA 3'  
..... :  
query 3' GUUGUUGUCGUUGUUCUCGU 5'  
query=novel\_mir\_124, target=R03G\_01976, score=3.5, range=0-0, str  
target 5' CAGCAACGGCAACAACAGCA 3'  
..... :  
query 3' GUUGUUGUCGUUGUUCUCGU 5'  
query=novel\_mir\_124, target=R03G\_03857, score=3.5, range=451-470,  
strand=1  
target 5' CAACAACAGCAGCAAGUGCG 3'  
..... :.  
query 3' GUUGUUGUCGUUGUUCUCGU 5'  
query=novel\_mir\_124, target=R03G\_06121, score=3.5, range=688-707,  
strand=1  
target 5' UGGCAACAGCAACAAAAGCA 3'  
..... :  
query 3' GUUGUUGUCGUUGUUCUCGU 5'  
query=novel\_mir\_124, target=R03G\_15299, score=3.5, range=1006-102  
strand=1  
target 5' CAGCAACGGCAACAAGA-CA 3'  
..... :  
query 3' GUUGUUGUCGUUGUUCUCGU 5'  
query=novel\_mir\_124, target=R03G\_05396, score=3.5, range=967-986,  
strand=1  
target 5' CAGCAACAGCAACAAGGACA 3'  
..... :  
query 3' GUUGUUGUCGUUGUUCUCGU 5'  
query=novel\_mir\_124, target=R03G\_05396, score=3.5, range=1573-159  
strand=1  
target 5' CAACAGCAGCAGCAACAGCA 3'  
..... :  
query 3' GUUGUUGUCGUUGUUCUCGU 5'  
query=novel\_mir\_124, target=R03G\_15548, score=3.5, range=258-277,  
strand=-1  
target 5' AAACAGCAGCAGCAGGAGCA 3'  
..... :  
query 3' GUUGUUGUCGUUGUUCUCGU 5'  
query=novel\_mir\_124, target=R03G\_08938, score=3.5, range=156-175,  
strand=-1  
target 5' UGACAGCAGCAGCAAGAGCC 3'  
..... :  
query 3' GUUGUUGUCGUUGUUCUCGU 5'  
query=novel\_mir\_124, target=R03G\_04434, score=3.5, range=831-850,  
strand=-1

target 5' CAGCAACAGCAAGAAGAGUA 3'  
:~::~~::~:~:~:~:~:  
query 3' GUUGUUGUCGUUGUUCUCGU 5'  
query=novel\_mir\_124, target=R03G\_14021, score=3.5, range=21-40,  
strand=-1  
target 5' CAGCAACAGCAACAGCAGCA 3'  
:~::~~::~:~:~:~:~:  
query 3' GUUGUUGUCGUUGUUCUCGU 5'  
query=novel\_mir\_124, target=R03G\_10822, score=3.5, range=696-715,  
strand=-1  
target 5' CAAUAGUAGCAACCAGAGCA 3'  
:~::~~::~:~:~:~:~:  
query 3' GUUGUUGUCGUUGUUCUCGU 5'  
query=novel\_mir\_124, target=R03G\_13723, score=3.5, range=642-661,  
strand=-1  
target 5' CAAUAGUAGCAACCAGAGCA 3'  
:~::~~::~:~:~:~:~:  
query 3' GUUGUUGUCGUUGUUCUCGU 5'  
query=novel\_mir\_124, target=R03G\_01682, score=3.5, range=588-607,  
strand=-1  
target 5' CAAUAGUAGCAACCAGAGCA 3'  
:~::~~::~:~:~:~:~:  
query 3' GUUGUUGUCGUUGUUCUCGU 5'  
query=novel\_mir\_124, target=R03G\_01331, score=3.5, range=345-364,  
strand=-1  
target 5' CAAAGACAGCAGCAAGGGCA 3'  
:~::~~::~:~:~:~:~:  
query 3' GUUGUUGUCGUUGUUCUCGU 5'  
query=novel\_mir\_124, target=R03G\_16159, score=3.5, range=696-715,  
strand=-1  
target 5' CAAUAGUAGCAACCAGAGCA 3'  
:~::~~::~:~:~:~:~:  
query 3' GUUGUUGUCGUUGUUCUCGU 5'  
query=novel\_mir\_124, target=R03G\_17119, score=3.5, range=23-43,  
strand=-1  
target 5' GAACAGCAGCAACUAAGAGCA 3'  
:~::~~::~:~:~:~:~:  
query 3' GUUGUUGUCGUUG-UUCUCGU 5'  
query=novel\_mir\_124, target=R03G\_12822, score=3.5, range=1158-117  
strand=-1  
target 5' AAGCAUCAGCAACAGGAGCA 3'  
:~::~~::~:~:~:~:~:  
query 3' GUUGUUGUCGUUGUUCUCGU 5'  
query=novel\_mir\_124, target=R03G\_04311, score=3.5, range=204-223,  
strand=-1

```

target 5' GAACAGGAGCAACAGGAGCA 3'
.....
query 3' GUUGUUGUCGUUGUUCUCGU 5'
query=novel_mir_124, target=R03G_02292, score=3.5, range=238-256,
strand=-1
target 5' CGACAACAGUAACAA-AGCA 3'
.....
query 3' GUUGUUGUCGUUGUUCUCGU 5'
query=novel_mir_124, target=R03G_13808, score=3.5, range=225-244,
strand=-1
target 5' CCAUAACAUCAACAAGAGCA 3'
: :.....
query 3' GUUGUUGUCGUUGUUCUCGU 5'
query=novel_mir_124, target=R03G_09265, score=3.5, range=120-139,
strand=-1
target 5' CAAUACCAGCAACAACAGCA 3'
: :.....
query 3' GUUGUUGUCGUUGUUCUCGU 5'
query=novel_mir_124, target=R03G_09070, score=3.5, range=81-100,
strand=-1
target 5' CAACAGCAGCAGCAACAGCA 3'
: :.....
query 3' GUUGUUGUCGUUGUUCUCGU 5'
query=novel_mir_124, target=R03G_16404, score=4, range=655-674,
strand=1
target 5' CAACAACAGCAGCAGCAGCA 3'
: :.....
query 3' GUUGUUGUCGUUGUUCUCGU 5'
query=novel_mir_124, target=R03G_10396, score=4, range=409-428,
strand=1
target 5' CAACAACAGCAGCAGCAGCA 3'
: :.....
query 3' GUUGUUGUCGUUGUUCUCGU 5'
query=novel_mir_124, target=R03G_07466, score=4, range=1738-1757,
strand=1
target 5' CAACAACAGCAGCAGCAGCA 3'
: :.....
query 3' GUUGUUGUCGUUGUUCUCGU 5'
query=novel_mir_124, target=R03G_15329, score=4, range=2902-2921,
strand=1
target 5' CAACAACAGCAGCAGCAGCA 3'
: :.....
query 3' GUUGUUGUCGUUGUUCUCGU 5'
query=novel_mir_124, target=R03G_16993, score=4, range=1721-1740,
strand=1

```



```

target 5' CAACAACAGCGGCAACAGCA 3'
:::::::::::::::::: :
query 3' GUUGUUGUCGUUGUUCUCGU 5'
query=novel_mir_124, target=R03G_06473, score=4, range=1051-1070,
strand=1
target 5' CAACAACAGCAGCAGCAGCA 3'
:::::::::::::::::: :
query 3' GUUGUUGUCGUUGUUCUCGU 5'
query=novel_mir_124, target=R03G_05308, score=4, range=2440-2459,
strand=1
target 5' CAACAACAGCAGCAGCAGCA 3'
:::::::::::::::::: :
query 3' GUUGUUGUCGUUGUUCUCGU 5'
query=novel_mir_124, target=R03G_08516, score=4, range=70-89, str
target 5' CAACAACAGCAGCAGCAGCA 3'
:::::::::::::::::: :
query 3' GUUGUUGUCGUUGUUCUCGU 5'
query=novel_mir_124, target=R03G_12904, score=4, range=817-836,
strand=1
target 5' CAACAACAGCAGCAGCAGCA 3'
:::::::::::::::::: :
query 3' GUUGUUGUCGUUGUUCUCGU 5'
query=novel_mir_124, target=R03G_11158, score=4, range=52-71, str
target 5' CAACAACAGCAGCAGCAGCA 3'
:::::::::::::::::: :
query 3' GUUGUUGUCGUUGUUCUCGU 5'
query=novel_mir_124, target=R03G_01102, score=4, range=1378-1397,
strand=1
target 5' CAACAACAGCAGCAGCAGCA 3'
:::::::::::::::::: :
query 3' GUUGUUGUCGUUGUUCUCGU 5'
query=novel_mir_124, target=R03G_10851, score=4, range=334-353,
strand=1
target 5' CAACAACAGCAGCAGCAGCA 3'
:::::::::::::::::: :
query 3' GUUGUUGUCGUUGUUCUCGU 5'
query=novel_mir_124, target=R03G_08864, score=4, range=112-131,
strand=1
target 5' CAACAACAGCAGCAGCAGCA 3'
:::::::::::::::::: :
query 3' GUUGUUGUCGUUGUUCUCGU 5'
query=novel_mir_124, target=R03G_05582, score=4, range=772-791,
strand=1
target 5' CAACAACAGCAGCAGCAGCA 3'
:::::::::::::::::: :

```

```

query 3' GUUGUUGUCGUUGUUCUCGU 5'
query=novel_mir_124, target=R03G_15999, score=4, range=925-944,
strand=1
target 5' CAACAACAGCAGCAGCAGCA 3'
::::::::::. ....
query 3' GUUGUUGUCGUUGUUCUCGU 5'
query=novel_mir_124, target=R03G_09721, score=4, range=598-617,
strand=1
target 5' CAACAACAGCAGCAGCAGCA 3'
::::::::::. ....
query 3' GUUGUUGUCGUUGUUCUCGU 5'
query=novel_mir_124, target=R03G_00729, score=4, range=937-956,
strand=1
target 5' CAACAACAGCAGCAGCAGCA 3'
::::::::::. ....
query 3' GUUGUUGUCGUUGUUCUCGU 5'
query=novel_mir_124, target=R03G_02252, score=4, range=328-347,
strand=1
target 5' CAACAACAGCAGCAGCAGCA 3'
::::::::::. ....
query 3' GUUGUUGUCGUUGUUCUCGU 5'
query=novel_mir_124, target=R03G_00028, score=4, range=370-389,
strand=1
target 5' CAACAACAGCAGCAGCAGCA 3'
::::::::::. ....
query 3' GUUGUUGUCGUUGUUCUCGU 5'
query=novel_mir_124, target=R03G_01791, score=4, range=167-186,
strand=1
target 5' CAACAACAGCAGCAGCAGCA 3'
::::::::::. ....
query 3' GUUGUUGUCGUUGUUCUCGU 5'
query=novel_mir_124, target=R03G_08774, score=4, range=223-242,
strand=1
target 5' CAACAACAGCAGCAGCAGCA 3'
::::::::::. ....
query 3' GUUGUUGUCGUUGUUCUCGU 5'
query=novel_mir_124, target=R03G_00501, score=4, range=100-119,
strand=1
target 5' CAACAACAGCAGCAGCAGCA 3'
::::::::::. ....
query 3' GUUGUUGUCGUUGUUCUCGU 5'
query=novel_mir_124, target=R03G_14274, score=4, range=223-242,
strand=1
target 5' CAACAACAGCAGCAGCAGCA 3'
::::::::::. ....

```

query 3' GUUGUUGUCGUUGUUCUCGU 5'  
query=novel\_mir\_124, target=R03G\_16262, score=4, range=156-175,  
strand=1  
target 5' CAACAACAGCAGCAGCAGCA 3'  
..... : : : :  
query 3' GUUGUUGUCGUUGUUCUCGU 5'  
query=novel\_mir\_124, target=R03G\_01552, score=4, range=151-170,  
strand=1  
target 5' CAACAACAGCAACAGCGGCA 3'  
..... : : : :  
query 3' GUUGUUGUCGUUGUUCUCGU 5'  
query=novel\_mir\_124, target=R03G\_04845, score=4, range=329-348,  
strand=1  
target 5' CAACAACAGCAGCAGCAGCA 3'  
..... : : : :  
query 3' GUUGUUGUCGUUGUUCUCGU 5'  
query=novel\_mir\_124, target=R03G\_07958, score=4, range=1277-1296,  
strand=1  
target 5' CGGCAACAGCAGCAACAGCA 3'  
..... : : : :  
query 3' GUUGUUGUCGUUGUUCUCGU 5'  
query=novel\_mir\_124, target=R03G\_08772, score=4, range=2878-2897,  
strand=1  
target 5' CAGCAGCAGCAACAGCAGCA 3'  
..... : : : :  
query 3' GUUGUUGUCGUUGUUCUCGU 5'  
query=novel\_mir\_124, target=R03G\_13607, score=4, range=577-596,  
strand=1  
target 5' CAGCAGCAGCAGCAAGAACA 3'  
..... : :  
query 3' GUUGUUGUCGUUGUUCUCGU 5'  
query=novel\_mir\_124, target=R03G\_11614, score=4, range=88-107,  
strand=1  
target 5' CAGCAGCAGCAACAGCAGCA 3'  
..... : : : :  
query 3' GUUGUUGUCGUUGUUCUCGU 5'  
query=novel\_mir\_124, target=R03G\_09497, score=4, range=55-74, str  
target 5' CAGCAGCAGCAGCAACAGCA 3'  
..... : : : :  
query 3' GUUGUUGUCGUUGUUCUCGU 5'  
query=novel\_mir\_124, target=R03G\_11209, score=4, range=6251-6270,  
strand=1  
target 5' CAGCAGAAGUAACAAGAGUA 3'  
..... : : : : : : : : : :  
query 3' GUUGUUGUCGUUGUUCUCGU 5'

query=novel\_mir\_124, target=R03G\_13941, score=4, range=237-256,  
strand=1  
target 5' AAGCAGCAGCAGCAAGAGCC 3'  
:.....  
query 3' GUUGUUGUCGUUGUUCUCGU 5'  
query=novel\_mir\_124, target=R03G\_07652, score=4, range=1123-1142,  
strand=1  
target 5' GAACAACAGCAACAGCAGCA 3'  
:..... :  
query 3' GUUGUUGUCGUUGUUCUCGU 5'  
query=novel\_mir\_124, target=R03G\_02772, score=4, range=1577-1596,  
strand=1  
target 5' AAACAACAACAACAGGAGCA 3'  
:..... :  
query 3' GUUGUUGUCGUUGUUCUCGU 5'  
query=novel\_mir\_124, target=R03G\_03548, score=4, range=825-844,  
strand=1  
target 5' CAACAACAGCAACAACAGUU 3'  
:..... :.  
query 3' GUUGUUGUCGUUGUUCUCGU 5'  
query=novel\_mir\_124, target=R03G\_05657, score=4, range=70-89, str  
target 5' CAACAACAGCAGCAACAGCU 3'  
:..... :  
query 3' GUUGUUGUCGUUGUUCUCGU 5'  
query=novel\_mir\_124, target=R03G\_11763, score=4, range=70-89, str  
target 5' CAACAACAGCAACAAGAAGA 3'  
:..... :  
query 3' GUUGUUGUCGUUGUUCUCGU 5'  
query=novel\_mir\_124, target=R03G\_02307, score=4, range=337-356,  
strand=1  
target 5' CAGCAGCAGCAACAACAGCC 3'  
:..... :  
query 3' GUUGUUGUCGUUGUUCUCGU 5'  
query=novel\_mir\_124, target=R03G\_04578, score=4, range=221-240,  
strand=1  
target 5' AAACACCAGUAACAAGGGCA 3'  
: :..... :  
query 3' GUUGUUGUCGUUGUUCUCGU 5'  
query=novel\_mir\_124, target=R03G\_00960, score=4, range=14-33, str  
target 5' AGAAGACAGUAACAAGAGCA 3'  
. : :..... :  
query 3' GUUGUUGUCGUUGUUCUCGU 5'  
query=novel\_mir\_124, target=R03G\_09758, score=4, range=1138-1157,  
strand=1  
target 5' CAACAACAACAACAACAGCA 3'

```
:::::::::: ::::: ::::
query 3' GUUGUUGUCGUUGUUCUCGU 5'
query=novel_mir_124, target=R03G_04258, score=4, range=1754-1773,
strand=1
target 5' CAACAACAGCAACAUAAGAA 3'
:::::::::: :::
query 3' GUUGUUGUCGUUGUUCUCGU 5'
query=novel_mir_124, target=R03G_09894, score=4, range=1981-2000,
strand=1
target 5' CAACAACAACAACAAGAACA 3'
:::::::::: :::::
query 3' GUUGUUGUCGUUGUUCUCGU 5'
query=novel_mir_124, target=R03G_08194, score=4, range=2143-2162,
strand=1
target 5' CAACAACAACAACAACAGCA 3'
:::::::::: :::::
query 3' GUUGUUGUCGUUGUUCUCGU 5'
query=novel_mir_124, target=R03G_11868, score=4, range=850-869,
strand=1
target 5' CAACAACAACAACAACAGCA 3'
:::::::::: :::::
query 3' GUUGUUGUCGUUGUUCUCGU 5'
query=novel_mir_124, target=R03G_12847, score=4, range=604-623,
strand=1
target 5' CAACAACAACAACAACAGCA 3'
:::::::::: :::::
query 3' GUUGUUGUCGUUGUUCUCGU 5'
query=novel_mir_124, target=R03G_15224, score=4, range=1136-1155,
strand=1
target 5' CAACAACAACAACAACAGCA 3'
:::::::::: :::::
query 3' GUUGUUGUCGUUGUUCUCGU 5'
query=novel_mir_124, target=R03G_00056, score=4, range=1519-1538,
strand=1
target 5' CAACAACAGCAACAACAACA 3'
:::::::::: : ::
query 3' GUUGUUGUCGUUGUUCUCGU 5'
query=novel_mir_124, target=R03G_08623, score=4, range=1042-1061,
strand=1
target 5' CAACAACAACAACAACAGCA 3'
:::::::::: :::::
query 3' GUUGUUGUCGUUGUUCUCGU 5'
query=novel_mir_124, target=R03G_15127, score=4, range=15-34, str
target 5' CAACAACAGCAACAACAACA 3'
:::::::::: : ::
```

```

query 3' GUUGUUGUCGUUGUUCUCGU 5'
query=novel_mir_124, target=R03G_12697, score=4, range=178-197,
strand=1
target 5' CAACAACAACAACAACAGCA 3'
::::::::: ::::: ::::
query 3' GUUGUUGUCGUUGUUCUCGU 5'
query=novel_mir_124, target=R03G_05403, score=4, range=1405-1424,
strand=1
target 5' CAACAACAACAACAACAGCA 3'
::::::::: ::::: ::::
query 3' GUUGUUGUCGUUGUUCUCGU 5'
query=novel_mir_124, target=R03G_15065, score=4, range=432-451,
strand=1
target 5' CAACAACAGCAACAACAACA 3'
:::::::::::::::::: : ::
query 3' GUUGUUGUCGUUGUUCUCGU 5'
query=novel_mir_124, target=R03G_06776, score=4, range=302-320,
strand=1
target 5' CAGCAGCAGCAGCAA-AGCA 3'
:::::::::::::::::: ::::
query 3' GUUGUUGUCGUUGUUCUCGU 5'
query=novel_mir_124, target=R03G_01092, score=4, range=514-533,
strand=1
target 5' CAACAACAACAACAACAGCA 3'
::::::::: ::::: ::::
query 3' GUUGUUGUCGUUGUUCUCGU 5'
query=novel_mir_124, target=R03G_01350, score=4, range=700-719,
strand=1
target 5' CAACAACAGCAACAACAACA 3'
:::::::::::::::::: : ::
query 3' GUUGUUGUCGUUGUUCUCGU 5'
query=novel_mir_124, target=R03G_02527, score=4, range=904-923,
strand=1
target 5' CAACAACAACAACAAGAUCA 3'
::::::::: ::::::: ::
query 3' GUUGUUGUCGUUGUUCUCGU 5'
query=novel_mir_124, target=R03G_06147, score=4, range=847-866,
strand=1
target 5' CAACAACAACAACAACAGCA 3'
::::::::: ::::: ::::
query 3' GUUGUUGUCGUUGUUCUCGU 5'
query=novel_mir_124, target=R03G_00171, score=4, range=714-733,
strand=1
target 5' CAACAACAGCAACAACAACA 3'
:::::::::::::::::: : ::

```

```
query 3' GUUGUUGUCGUUGUUCUCGU 5'
query=novel_mir_124, target=R03G_01247, score=4, range=835-854,
strand=1
target 5' CAACAACAGCAACAACAUCA 3'
: : : : : : : : : : : :
query 3' GUUGUUGUCGUUGUUCUCGU 5'
query=novel_mir_124, target=R03G_01238, score=4, range=835-854,
strand=1
target 5' CAACAACAGCAACAACAUCA 3'
: : : : : : : : : : : :
query 3' GUUGUUGUCGUUGUUCUCGU 5'
query=novel_mir_124, target=R03G_03525, score=4, range=334-353,
strand=1
target 5' CAACAACAACAACAACAGCA 3'
: : : : : : : : : : : :
query 3' GUUGUUGUCGUUGUUCUCGU 5'
query=novel_mir_124, target=R03G_01351, score=4, range=733-752,
strand=1
target 5' CAACAACAGCAACAACAACA 3'
: : : : : : : : : : : :
query 3' GUUGUUGUCGUUGUUCUCGU 5'
query=novel_mir_124, target=R03G_05178, score=4, range=607-626,
strand=1
target 5' CAACAACAGCAUCAACAGCA 3'
: : : : : : : : : : : :
query 3' GUUGUUGUCGUUGUUCUCGU 5'
query=novel_mir_124, target=R03G_11865, score=4, range=352-371,
strand=1
target 5' CAACAACAACAACAACAGCA 3'
: : : : : : : : : : : :
query 3' GUUGUUGUCGUUGUUCUCGU 5'
query=novel_mir_124, target=R03G_14937, score=4, range=150-169,
strand=1
target 5' CAACAACAGCAACAACAACA 3'
: : : : : : : : : : : :
query 3' GUUGUUGUCGUUGUUCUCGU 5'
query=novel_mir_124, target=R03G_14449, score=4, range=17-36, str
target 5' CAACAACAACAACAACAGCA 3'
: : : : : : : : : : : :
query 3' GUUGUUGUCGUUGUUCUCGU 5'
query=novel_mir_124, target=R03G_08870, score=4, range=328-347,
strand=1
target 5' CAACAACAACAACAACAGCA 3'
: : : : : : : : : : : :
query 3' GUUGUUGUCGUUGUUCUCGU 5'
```

query=novel\_mir\_124, target=R03G\_02434, score=4, range=220-239,  
strand=1  
target 5' CAACAACAACAACAACAGCA 3'  
..... : : : :  
query 3' GUUGUUGUCGUUGUUCUCGU 5'  
query=novel\_mir\_124, target=R03G\_15115, score=4, range=1573-1593,  
strand=1  
target 5' CAACAACAGCAACAACAAGCA 3'  
..... : : : :  
query 3' GUUGUUGUCGUUGUU-CUCGU 5'  
query=novel\_mir\_124, target=R03G\_17036, score=4, range=1723-1742,  
strand=1  
target 5' CAACAUCAGCAGCAAGAACA 3'  
..... : :  
query 3' GUUGUUGUCGUUGUUCUCGU 5'  
query=novel\_mir\_124, target=R03G\_15376, score=4, range=799-818,  
strand=1  
target 5' CAACAAAAGCAGCAAAAGCA 3'  
..... : : : :  
query 3' GUUGUUGUCGUUGUUCUCGU 5'  
query=novel\_mir\_124, target=R03G\_07013, score=4, range=1057-1076,  
strand=1  
target 5' CAACAAAAGCAGCAAGAACA 3'  
..... : :  
query 3' GUUGUUGUCGUUGUUCUCGU 5'  
query=novel\_mir\_124, target=R03G\_06968, score=4, range=89-108,  
strand=1  
target 5' CAAAUACAGCAGCAGGAGCA 3'  
:: : : : : : : : : : : : : :  
query 3' GUUGUUGUCGUUGUUCUCGU 5'  
query=novel\_mir\_124, target=R03G\_06000, score=4, range=244-263,  
strand=1  
target 5' CAGUCUCGGCAACAAGAGCA 3'  
: : : : : : : : : : : : : : : : : : : :  
query 3' GUUGUUGUCGUUGUUCUCGU 5'  
query=novel\_mir\_124, target=R03G\_08501, score=4, range=3007-3025,  
strand=1  
target 5' CAACAACAGCAACAA-AACA 3'  
..... : :  
query 3' GUUGUUGUCGUUGUUCUCGU 5'  
query=novel\_mir\_124, target=R03G\_05416, score=4, range=29-49, str  
target 5' UAGUAUUAAGCAACAAGAGCA 3'  
. . . . : : : : : : : : : : : : : :  
query 3' GUUGUUG-UCGUUGUUCUCGU 5'  
query=novel\_mir\_124, target=R03G\_08485, score=4, range=325-345,



strand=1  
target 5' GAACUACAGCAACAAGAAGCA 3'  
::: :::::::::::::: ::::  
query 3' GUUGUUGUCGUUGUUC-UCGU 5'  
query=novel\_mir\_124, target=R03G\_09315, score=4, range=577-596,  
strand=1  
target 5' CAAGAAAAGCAACAAGAGUU 3'  
::: :: ::::::::::::::.  
query 3' GUUGUUGUCGUUGUUCUCGU 5'  
query=novel\_mir\_124, target=R03G\_14690, score=4, range=58-76, str  
target 5' CGACUACAGCAACAA-AGCG 3'  
:..: :::::::::::::: :..:  
query 3' GUUGUUGUCGUUGUUCUCGU 5'  
query=novel\_mir\_124, target=R03G\_06465, score=4, range=593-611,  
strand=1  
target 5' CAAAACCAGCAA-AAGAGCA 3'  
::: : :::::::::::::: ::::::::::  
query 3' GUUGUUGUCGUUGUUCUCGU 5'  
query=novel\_mir\_124, target=R03G\_02457, score=4, range=50-70, str  
target 5' UAGCAAAAAGCAAUCAAGAGCA 3'  
.:..: :..: :..: :..: :..: :..:  
query 3' GUUGUUGUCGUU-GUUCUCGU 5'  
query=novel\_mir\_124, target=R03G\_08982, score=4, range=190-209,  
strand=1  
target 5' CAACAACAGCAGCAGCAGCA 3'  
:..: :..: :..: :..: :..: :..:  
query 3' GUUGUUGUCGUUGUUCUCGU 5'  
query=novel\_mir\_124, target=R03G\_06473, score=4, range=1015-1034,  
strand=1  
target 5' CAACAACAGCAGCAGCAGCA 3'  
:..: :..: :..: :..: :..: :..:  
query 3' GUUGUUGUCGUUGUUCUCGU 5'  
query=novel\_mir\_124, target=R03G\_10995, score=4, range=1678-1697,  
strand=1  
target 5' CAACAACAGCAGCAGCAGCA 3'  
:..: :..: :..: :..: :..: :..:  
query 3' GUUGUUGUCGUUGUUCUCGU 5'  
query=novel\_mir\_124, target=R03G\_01361, score=4, range=457-476,  
strand=1  
target 5' CAACAACAGCAGCAGCAGCA 3'  
:..: :..: :..: :..: :..: :..:  
query 3' GUUGUUGUCGUUGUUCUCGU 5'  
query=novel\_mir\_124, target=R03G\_02100, score=4, range=454-473,  
strand=1  
target 5' CAGCAGCAGCAACAGCAGCA 3'

..... : : : :  
query 3' GUUGUUGUCGUUGUUCUCGU 5'  
query=novel\_mir\_124, target=R03G\_03212, score=4, range=154-173,  
strand=1  
target 5' CAACAACAGCAGCAGCAGCA 3'  
..... : : : :  
query 3' GUUGUUGUCGUUGUUCUCGU 5'  
query=novel\_mir\_124, target=R03G\_12391, score=4, range=835-854,  
strand=1  
target 5' CAGCAGCAGCAUCAAGAGCC 3'  
..... : : : : : : : : : :  
query 3' GUUGUUGUCGUUGUUCUCGU 5'  
query=novel\_mir\_124, target=R03G\_15329, score=4, range=2926-2945,  
strand=1  
target 5' CAACAACAACAACAACAGCA 3'  
..... : : : : : : : : : :  
query 3' GUUGUUGUCGUUGUUCUCGU 5'  
query=novel\_mir\_124, target=R03G\_00949, score=4, range=1189-1208,  
strand=1  
target 5' CAACAACAACAACAACAGCA 3'  
..... : : : : : : : : : :  
query 3' GUUGUUGUCGUUGUUCUCGU 5'  
query=novel\_mir\_124, target=R03G\_05308, score=4, range=2467-2486,  
strand=1  
target 5' CAACAACAGCAACAACAACA 3'  
..... : : : : : : : : : :  
query 3' GUUGUUGUCGUUGUUCUCGU 5'  
query=novel\_mir\_124, target=R03G\_12904, score=4, range=1008-1027,  
strand=1  
target 5' CAACAACAGCAACAACAACA 3'  
..... : : : : : : : : : :  
query 3' GUUGUUGUCGUUGUUCUCGU 5'  
query=novel\_mir\_124, target=R03G\_04522, score=4, range=1534-1553,  
strand=1  
target 5' CAACAACAACAACAACAGCA 3'  
..... : : : : : : : : : :  
query 3' GUUGUUGUCGUUGUUCUCGU 5'  
query=novel\_mir\_124, target=R03G\_11678, score=4, range=820-839,  
strand=1  
target 5' CAACAACAGCAACAACAACA 3'  
..... : : : : : : : : : :  
query 3' GUUGUUGUCGUUGUUCUCGU 5'  
query=novel\_mir\_124, target=R03G\_12746, score=4, range=505-524,  
strand=1  
target 5' CAACAACAACAACAACAGCA 3'

```
:::::::::: ::::: ::::
query 3' GUUGUUGUCGUUGUUCUCGU 5'
query=novel_mir_124, target=R03G_10399, score=4, range=364-383,
strand=1
target 5' CAACAACAACAACAACAGCA 3'
:::::::::: ::::: ::::
query 3' GUUGUUGUCGUUGUUCUCGU 5'
query=novel_mir_124, target=R03G_03477, score=4, range=277-296,
strand=1
target 5' CAACAACAACAACAACAGCA 3'
:::::::::: ::::: ::::
query 3' GUUGUUGUCGUUGUUCUCGU 5'
query=novel_mir_124, target=R03G_07933, score=4, range=406-425,
strand=1
target 5' CAACAACAACAACAACAGCA 3'
:::::::::: ::::: ::::
query 3' GUUGUUGUCGUUGUUCUCGU 5'
query=novel_mir_124, target=R03G_00934, score=4, range=304-323,
strand=1
target 5' CAACAACAGCAACAACAACA 3'
:::::::::: ::::: ::::
query 3' GUUGUUGUCGUUGUUCUCGU 5'
query=novel_mir_124, target=R03G_16326, score=4, range=679-698,
strand=1
target 5' CAACAACAACAACAACAGCA 3'
:::::::::: ::::: ::::
query 3' GUUGUUGUCGUUGUUCUCGU 5'
query=novel_mir_124, target=R03G_02527, score=4, range=979-998,
strand=1
target 5' CAACAACAGCAACAACAACA 3'
:::::::::: ::::: ::::
query 3' GUUGUUGUCGUUGUUCUCGU 5'
query=novel_mir_124, target=R03G_08547, score=4, range=226-245,
strand=1
target 5' CAACAACAACAACAACAGCA 3'
:::::::::: ::::: ::::
query 3' GUUGUUGUCGUUGUUCUCGU 5'
query=novel_mir_124, target=R03G_15194, score=4, range=481-500,
strand=1
target 5' CAACAACAGCAACAACAACA 3'
:::::::::: ::::: ::::
query 3' GUUGUUGUCGUUGUUCUCGU 5'
query=novel_mir_124, target=R03G_16582, score=4, range=655-675,
strand=1
target 5' CAACAACAGCAACAACAAGCA 3'
```

```
:::::
query 3' GUUGUUGUCGUUGUU-CUCGU 5'
query=novel_mir_124, target=R03G_08675, score=4, range=103-122,
strand=1
target 5' CAACAACAGCAACAACAACA 3'
:::::
query 3' GUUGUUGUCGUUGUUCUCGU 5'
query=novel_mir_124, target=R03G_15256, score=4, range=229-248,
strand=1
target 5' CAGAUGCAGCAGCAAGAGCA 3'
:: .:::::
query 3' GUUGUUGUCGUUGUUCUCGU 5'
query=novel_mir_124, target=R03G_10737, score=4, range=229-248,
strand=1
target 5' CAGAUGCAGCAGCAAGAGCA 3'
:: .:::::
query 3' GUUGUUGUCGUUGUUCUCGU 5'
query=novel_mir_124, target=R03G_02827, score=4, range=229-248,
strand=1
target 5' CAGAUGCAGCAGCAAGAGCA 3'
:: .:::::
query 3' GUUGUUGUCGUUGUUCUCGU 5'
query=novel_mir_124, target=R03G_10048, score=4, range=229-248,
strand=1
target 5' CAGAUGCAGCAGCAAGAGCA 3'
:: .:::::
query 3' GUUGUUGUCGUUGUUCUCGU 5'
query=novel_mir_124, target=R03G_00259, score=4, range=229-248,
strand=1
target 5' CAGAUGCAGCAGCAAGAGCA 3'
:: .:::::
query 3' GUUGUUGUCGUUGUUCUCGU 5'
query=novel_mir_124, target=R03G_16127, score=4, range=229-248,
strand=1
target 5' CAGAUGCAGCAGCAAGAGCA 3'
:: .:::::
query 3' GUUGUUGUCGUUGUUCUCGU 5'
query=novel_mir_124, target=R03G_02231, score=4, range=229-248,
strand=1
target 5' CAGAUGCAGCAGCAAGAGCA 3'
:: .:::::
query 3' GUUGUUGUCGUUGUUCUCGU 5'
query=novel_mir_124, target=R03G_13711, score=4, range=229-248,
strand=1
target 5' CAGAUGCAGCAGCAAGAGCA 3'
```

```
::: .::::::::::::::::::
query 3' GUUGUUGUCGUUGUUCUCGU 5'
query=novel_mir_124, target=R03G_05910, score=4, range=229-248,
strand=1
target 5' CAGAUGCAGCAGCAAGAGCA 3'
::: .::::::::::::::::::
query 3' GUUGUUGUCGUUGUUCUCGU 5'
query=novel_mir_124, target=R03G_01198, score=4, range=229-248,
strand=1
target 5' CAGAUGCAGCAGCAAGAGCA 3'
::: .::::::::::::::::::
query 3' GUUGUUGUCGUUGUUCUCGU 5'
query=novel_mir_124, target=R03G_05955, score=4, range=229-248,
strand=1
target 5' CAGAUGCAGCAGCAAGAGCA 3'
::: .::::::::::::::::::
query 3' GUUGUUGUCGUUGUUCUCGU 5'
query=novel_mir_124, target=R03G_12192, score=4, range=229-248,
strand=1
target 5' CAGAUGCAGCAGCAAGAGCA 3'
::: .::::::::::::::::::
query 3' GUUGUUGUCGUUGUUCUCGU 5'
query=novel_mir_124, target=R03G_17242, score=4, range=229-248,
strand=1
target 5' CAGAUGCAGCAGCAAGAGCA 3'
::: .::::::::::::::::::
query 3' GUUGUUGUCGUUGUUCUCGU 5'
query=novel_mir_124, target=R03G_10815, score=4, range=2578-2597,
strand=1
target 5' CAACAACAGCAGCAGCAGCA 3'
:::::::::::::::::: ::::
query 3' GUUGUUGUCGUUGUUCUCGU 5'
query=novel_mir_124, target=R03G_09085, score=4, range=847-866,
strand=1
target 5' CAACAACAGCAGCAGCAGCA 3'
:::::::::::::::::: ::::
query 3' GUUGUUGUCGUUGUUCUCGU 5'
query=novel_mir_124, target=R03G_10995, score=4, range=1645-1664,
strand=1
target 5' CAACAACAGCAACAACAACA 3'
:::::::::::::::::: : ::
query 3' GUUGUUGUCGUUGUUCUCGU 5'
query=novel_mir_124, target=R03G_10494, score=4, range=28-47, str
target 5' CAACAACAACAACAACAGCA 3'
:::::::::: ::::: ::::
```

query 3' GUUGUUGUCGUUGUUCUCGU 5'  
query=novel\_mir\_124, target=R03G\_07933, score=4, range=0-0, stran  
target 5' CAACAACAGCAGCAGCAGCA 3'  
..... :  
query 3' GUUGUUGUCGUUGUUCUCGU 5'  
query=novel\_mir\_124, target=R03G\_03682, score=4, range=58-77,  
strand=-1  
target 5' CAACAACAGCAGCAGCAGCA 3'  
..... :  
query 3' GUUGUUGUCGUUGUUCUCGU 5'  
query=novel\_mir\_124, target=R03G\_03227, score=4, range=1758-1777,  
strand=-1  
target 5' CAACAACAGCAGCGACAGCA 3'  
..... :  
query 3' GUUGUUGUCGUUGUUCUCGU 5'  
query=novel\_mir\_124, target=R03G\_04860, score=4, range=54-73,  
strand=-1  
target 5' CAACAACAGCAGCAGCAGCA 3'  
..... :  
query 3' GUUGUUGUCGUUGUUCUCGU 5'  
query=novel\_mir\_124, target=R03G\_00351, score=4, range=939-958,  
strand=-1  
target 5' CAACAACAGUAACAAGAGAU 3'  
..... :  
query 3' GUUGUUGUCGUUGUUCUCGU 5'  
query=novel\_mir\_124, target=R03G\_07494, score=4, range=648-667,  
strand=-1  
target 5' UAGCAACAUCAACAGGAGCA 3'  
..... :  
query 3' GUUGUUGUCGUUGUUCUCGU 5'  
query=novel\_mir\_124, target=R03G\_06259, score=4, range=1686-1705,  
strand=-1  
target 5' CAGCAAUAGCAAUAACAGCA 3'  
..... :  
query 3' GUUGUUGUCGUUGUUCUCGU 5'  
query=novel\_mir\_124, target=R03G\_02456, score=4, range=18-37,  
strand=-1  
target 5' UAGCAACAGCAACAAUGGCA 3'  
..... :  
query 3' GUUGUUGUCGUUGUUCUCGU 5'  
query=novel\_mir\_124, target=R03G\_15621, score=4, range=3254-3274,  
strand=-1  
target 5' UGACAACAGCGACAAGUAGCA 3'  
..... :  
query 3' GUUGUUGUCGUUGUUC-UCGU 5'

query=novel\_mir\_124, target=R03G\_02334, score=4, range=327-346,  
strand=-1  
target 5' CAGCGACAGCAGCAAUAGCA 3'  
.....: :  
query 3' GUUGUUGUCGUUGUUCUCGU 5'  
query=novel\_mir\_124, target=R03G\_14650, score=4, range=1700-1720,  
strand=-1  
target 5' CAAUAGCAGCAGGCAAGAGCA 3'  
.....: :  
query 3' GUUGUUGUCGU-UGUUCUCGU 5'  
query=novel\_mir\_124, target=R03G\_16166, score=4, range=2334-2353,  
strand=-1  
target 5' CAGGAGCAGCAGCAGGAGCA 3'  
.. :.....: :  
query 3' GUUGUUGUCGUUGUUCUCGU 5'  
query=novel\_mir\_124, target=R03G\_09746, score=4, range=2424-2443,  
strand=-1  
target 5' AAACAACAUCAGCAAGAGCA 3'  
.....: :.....: :  
query 3' GUUGUUGUCGUUGUUCUCGU 5'  
query=novel\_mir\_124, target=R03G\_11514, score=4, range=1056-1075,  
strand=-1  
target 5' UGACAACAGCAACAAGACCU 3'  
.....: :  
query 3' GUUGUUGUCGUUGUUCUCGU 5'  
query=novel\_mir\_124, target=R03G\_13632, score=4, range=1056-1075,  
strand=-1  
target 5' CAGCAGCAGCACCAAGAGCC 3'  
.....: :.....: :  
query 3' GUUGUUGUCGUUGUUCUCGU 5'  
query=novel\_mir\_124, target=R03G\_07144, score=4, range=393-411,  
strand=-1  
target 5' CAAU-GCAGCAAUAAGGGCA 3'  
... :.....: :  
query 3' GUUGUUGUCGUUGUUCUCGU 5'  
query=novel\_mir\_124, target=R03G\_03647, score=4, range=462-481,  
strand=-1  
target 5' CAUCAACAGUAACAAAAGCA 3'  
:: :.....: : : :  
query 3' GUUGUUGUCGUUGUUCUCGU 5'  
query=novel\_mir\_124, target=R03G\_12627, score=4, range=762-781,  
strand=-1  
target 5' CAACACCAGCAACAAGUGUA 3'  
.....: : : :  
query 3' GUUGUUGUCGUUGUUCUCGU 5'

query=novel\_mir\_124, target=R03G\_06586, score=4, range=27-45,  
strand=-1  
target 5' CAAU-GCAGUAGCAAGAGCA 3'  
::: .::::.::::.:::::  
query 3' GUUGUUGUCGUUGUUCUCGU 5'  
query=novel\_mir\_124, target=R03G\_11663, score=4, range=318-337,  
strand=-1  
target 5' CAACAAGAGCAACAGGAUCA 3'  
:::::: ::::::::::: ::  
query 3' GUUGUUGUCGUUGUUCUCGU 5'  
query=novel\_mir\_124, target=R03G\_15791, score=4, range=375-395,  
strand=-1  
target 5' CAAUCAACAACAACAAGGGCA 3'  
::: ::::: ::::::::::: ::  
query 3' GUU-GUUGUCGUUGUUCUCGU 5'  
query=novel\_mir\_124, target=R03G\_12127, score=4, range=339-359,  
strand=-1  
target 5' CAAUCAACAACAACAAGGGCA 3'  
::: ::::: ::::::::::: ::  
query 3' GUU-GUUGUCGUUGUUCUCGU 5'  
query=novel\_mir\_124, target=R03G\_03148, score=4, range=351-370,  
strand=-1  
target 5' CCUUAGCAGCAACAGGAGCA 3'  
: .::::.::::.:::::  
query 3' GUUGUUGUCGUUGUUCUCGU 5'  
query=novel\_mir\_124, target=R03G\_06226, score=4, range=966-985,  
strand=-1  
target 5' CGAUAAAAGCAACAAGACCA 3'  
:::::: ::::::::::: ::  
query 3' GUUGUUGUCGUUGUUCUCGU 5'  
query=novel\_mir\_124, target=R03G\_02241, score=4, range=219-238,  
strand=-1  
target 5' CAAAGAUAGCAACAAGAACA 3'  
::: .::::.::::.:::::  
query 3' GUUGUUGUCGUUGUUCUCGU 5'  
query=novel\_mir\_124, target=R03G\_15433, score=4, range=1800-1820,  
strand=-1  
target 5' CUACGAGCAGCAAUAAGAGCG 3'  
: :: .::::.::::.:::::  
query 3' GUUG-UUGUCGUUGUUCUCGU 5'  
query=novel\_mir\_124, target=R03G\_02261, score=4, range=1893-1912,  
strand=-1  
target 5' CAAAACAGCAACAAGAUCC 3'  
::: ::::::::::: :  
query 3' GUUGUUGUCGUUGUUCUCGU 5'



query=novel\_mir\_124, target=R03G\_13478, score=4, range=363-381,  
strand=-1  
target 5' CAA-AACAGCAACAAUGGCA 3'  
::: :::::::::::::: ::::  
query 3' GUUGUUGUCGUUGUUCUCGU 5'  
query=novel\_mir\_124, target=R03G\_08587, score=4, range=63-82,  
strand=-1  
target 5' CACCAAAAGCAACAACAGCA 3'  
:: ::: :::::::::::::: ::::  
query 3' GUUGUUGUCGUUGUUCUCGU 5'  
query=novel\_mir\_124, target=R03G\_01622, score=4, range=138-156,  
strand=-1  
target 5' CAACAA-AGCAGCAAUAGCA 3'  
::::: :::::::::::::: ::::  
query 3' GUUGUUGUCGUUGUUCUCGU 5'  
query=novel\_mir\_124, target=R03G\_01621, score=4, range=138-156,  
strand=-1  
target 5' CAACAA-AGCAGCAAUAGCA 3'  
::::: :::::::::::::: ::::  
query 3' GUUGUUGUCGUUGUUCUCGU 5'  
query=novel\_mir\_124, target=R03G\_14115, score=4, range=1238-1258,  
strand=-1  
target 5' UAGCAACAGGCAACAAGAGCU 3'  
..::::: ::::::::::::::  
query 3' GUUGUUGU-CGUUGUUCUCGU 5'  
query=novel\_mir\_124, target=R03G\_15193, score=4, range=225-244,  
strand=-1  
target 5' CAACAACAACAACAACAGCA 3'  
:::::::::: :::::::::: ::::  
query 3' GUUGUUGUCGUUGUUCUCGU 5'  
query=novel\_mir\_124, target=R03G\_04860, score=4, range=78-97,  
strand=-1  
target 5' CAACAACAACAACAACAGCA 3'  
:::::::::: :::::::::: ::::  
query 3' GUUGUUGUCGUUGUUCUCGU 5'  
query=novel\_mir\_124, target=R03G\_09070, score=4, range=30-49,  
strand=-1  
target 5' CAACAACAGCAGCAGCAGCA 3'  
::::::::::: :::::::::: ::::  
query 3' GUUGUUGUCGUUGUUCUCGU 5'  
query=novel\_mir\_93, target=R03G\_14767, score=1, range=271-293,  
strand=-1  
target 5' AGGGUUUUGUGAGGCACUGUAUC 3'  
::::::::::: ::::::::::::::  
query 3' UCCCAAAACACUCCGUGACAUAU 5'









query=novel\_mir\_90, target=R03G\_14875, score=0.5, range=1088-1108  
strand=-1  
target 5' CCUAAAUAGAGCGGCUACUG 3'  
.....  
query 3' GGAAUUUAUCUCGCCGAUGAU 5'

query=novel\_mir\_90, target=R03G\_03144, score=0.5, range=662-682,  
strand=-1  
target 5' UCUAAAUAGAGCGGCUACUA 3'  
.:::::  
query 3' GGAAUUUAUCUCGCCGAUGAU 5'

query=novel\_mir\_90, target=R03G\_02421, score=0.5, range=617-637,  
strand=-1  
target 5' CCUAAAUAGAGCGGCUACUG 3'  
.....  
query 3' GGAAUUUAUCUCGCCGAUGAU 5'

query=novel\_mir\_90, target=R03G\_00616, score=0.5, range=311-331,  
strand=-1  
target 5' CCUAAAUAGAGCGGCUACUG 3'  
.....  
query 3' GGAAUUUAUCUCGCCGAUGAU 5'

query=novel\_mir\_90, target=R03G\_09103, score=1, range=464-484,  
strand=1  
target 5' CCUAAAUAGGGCGGCUACUA 3'  
.....  
query 3' GGAAUUUAUCUCGCCGAUGAU 5'

query=novel\_mir\_90, target=R03G\_13940, score=2.5, range=377-397,  
strand=1  
target 5' CCUAAAUAGAGCGACUACUG 3'  
.....  
query 3' GGAAUUUAUCUCGCCGAUGAU 5'

query=novel\_mir\_90, target=R03G\_15229, score=2.5, range=305-325,  
strand=1  
target 5' CCUAAAUAGAGCGACUACUG 3'  
.....  
query 3' GGAAUUUAUCUCGCCGAUGAU 5'

query=novel\_mir\_90, target=R03G\_04446, score=3.5, range=341-361,  
strand=1  
target 5' CCUAAAUAGAGCGACUAUUG 3'  
.....  
query 3' GGAAUUUAUCUCGCCGAUGAU 5'

query=novel\_mir\_88, target=R03G\_17168, score=1, range=954-976,  
strand=-1  
target 5' UCUUUGUCAUAGAGCGCGUGAUA 3'  
.....  
query 3' UGAAACAGUUACUCGCGCACUAU 5'

query=novel\_mir\_52, target=R03G\_12146, score=1.5, range=1032-1052  
strand=-1  
target 5' UCCUUCUUUUCUCCUUCCTCA 3'  
.....  
query 3' AGGAGGGGAAGAGGAAGGGGU 5'

query=novel\_mir\_52, target=R03G\_13996, score=2.5, range=217-237,  
strand=1  
target 5' UCCUCUCGUUCUCCUUCCTCA 3'  
.....  
query 3' AGGAGGGGAAGAGGAAGGGGU 5'

query=novel\_mir\_52, target=R03G\_11176, score=2.5, range=378-398,  
strand=-1  
target 5' UCCUCCUCUUCUCCUUCCTCA 3'  
.....  
query 3' AGGAGGGGAAGAGGAAGGGGU 5'

query=novel\_mir\_52, target=R03G\_05630, score=3, range=1192-1212,  
strand=1  
target 5' UCCUCUCCUUCUCCUUCUUCG 3'  
.....  
query 3' AGGAGGGGAAGAGGAAGGGGU 5'

query=novel\_mir\_52, target=R03G\_12863, score=3, range=820-840,  
strand=1  
target 5' UCUUCUCCUUCUUCUUCUCCA 3'  
.....  
query 3' AGGAGGGGAAGAGGAAGGGGU 5'

query=novel\_mir\_52, target=R03G\_07279, score=3, range=3574-3594,  
strand=1  
target 5' UCCUCCGCUUCUUCUUCUCCA 3'  
.....  
query 3' AGGAGGGGAAGAGGAAGGGGU 5'

query=novel\_mir\_52, target=R03G\_07351, score=3, range=348-368,  
strand=-1  
target 5' UCCUCUUCUUCUUCUUCUCCA 3'  
.....  
query 3' AGGAGGGGAAGAGGAAGGGGU 5'

query=novel\_mir\_52, target=R03G\_09014, score=3, range=1164-1184,  
strand=-1  
target 5' UCCUCUUCUUCUCCUUCCTCA 3'  
.....  
query 3' AGGAGGGGAAGAGGAAGGGGU 5'

query=novel\_mir\_52, target=R03G\_04734, score=3, range=198-219,  
strand=-1  
target 5' UCCUCCUCCUUCUCCUUCCTCA 3'  
.....  
query 3' AGGAGG-GGAAGAGGAAGGGGU 5'

query=novel\_mir\_52, target=R03G\_01691, score=3.5, range=484-504,  
strand=1  
target 5' CCCUCUCCUUCUCCUCCUCU 3'  
:~::~  
query 3' AGGAGGGGAAGAGGAAGGGGU 5'  
query=novel\_mir\_52, target=R03G\_04771, score=3.5, range=606-626,  
strand=-1  
target 5' UCCUCCUCUUCUUCUUCUUCA 3'  
:~::~  
query 3' AGGAGGGGAAGAGGAAGGGGU 5'  
query=novel\_mir\_52, target=R03G\_03638, score=3.5, range=162-182,  
strand=-1  
target 5' UCCUCCUCUUCUUCUUCUUCA 3'  
:~::~  
query 3' AGGAGGGGAAGAGGAAGGGGU 5'  
query=novel\_mir\_52, target=R03G\_07832, score=3.5, range=630-650,  
strand=-1  
target 5' UCCUCCUCUUCUUCUUCUUCA 3'  
:~::~  
query 3' AGGAGGGGAAGAGGAAGGGGU 5'  
query=novel\_mir\_52, target=R03G\_01773, score=3.5, range=1230-1250  
strand=-1  
target 5' UCCUCCUCUUCUUCUCCUCC 3'  
:~::~  
query 3' AGGAGGGGAAGAGGAAGGGGU 5'  
query=novel\_mir\_52, target=R03G\_00417, score=3.5, range=60-80,  
strand=-1  
target 5' UCCUCCUCUUCUUCUCCUCC 3'  
:~::~  
query 3' AGGAGGGGAAGAGGAAGGGGU 5'  
query=novel\_mir\_52, target=R03G\_01098, score=3.5, range=378-398,  
strand=-1  
target 5' UCCUCCUCUUCUUCUUCUUCA 3'  
:~::~  
query 3' AGGAGGGGAAGAGGAAGGGGU 5'  
query=novel\_mir\_52, target=R03G\_15201, score=3.5, range=543-563,  
strand=-1  
target 5' UCCUCCUCUUCUUCUUCUUCA 3'  
:~::~  
query 3' AGGAGGGGAAGAGGAAGGGGU 5'  
query=novel\_mir\_52, target=R03G\_03013, score=3.5, range=1875-1895  
strand=-1  
target 5' UCCUCCUCUUCUUCUCCUCC 3'  
:~::~  
query 3' AGGAGGGGAAGAGGAAGGGGU 5'



```

query=novel_mir_52, target=R03G_14266, score=3.5, range=102-122,
strand=-1
target 5' UCCUCCUCUUCUUCUUCUCCUCU 3'
.....:
query 3' AGGAGGGGAAGAGGAAGGGGU 5'
query=novel_mir_52, target=R03G_13925, score=3.5, range=1344-1364
strand=-1
target 5' UCCUCCUCUUCUUCUUCUCCUCU 3'
.....:
query 3' AGGAGGGGAAGAGGAAGGGGU 5'
query=novel_mir_52, target=R03G_10079, score=3.5, range=243-263,
strand=-1
target 5' UCCUCCUCUUCUUCUUCUCCUCU 3'
.....:
query 3' AGGAGGGGAAGAGGAAGGGGU 5'
query=novel_mir_52, target=R03G_01341, score=3.5, range=345-365,
strand=-1
target 5' UCUUCCCCUUCUUCUUCACCA 3'
.....:
query 3' AGGAGGGGAAGAGGAAGGGGU 5'
query=novel_mir_52, target=R03G_04166, score=3.5, range=636-656,
strand=-1
target 5' UCAUCCUCUUCUCCUUCUCCU 3'
:: .....:
query 3' AGGAGGGGAAGAGGAAGGGGU 5'
query=novel_mir_52, target=R03G_10079, score=3.5, range=642-662,
strand=-1
target 5' UCCUCCUCUUCUUCUUCUCCUCU 3'
.....:
query 3' AGGAGGGGAAGAGGAAGGGGU 5'
query=novel_mir_52, target=R03G_14448, score=4, range=532-552,
strand=1
target 5' UCUUCUCCUUCUCCUUCUCUU 3'
.....:
query 3' AGGAGGGGAAGAGGAAGGGGU 5'
query=novel_mir_52, target=R03G_11208, score=4, range=163-183,
strand=1
target 5' UCUUCUGCUUCUUCUUCUCCA 3'
.....:
query 3' AGGAGGGGAAGAGGAAGGGGU 5'
query=novel_mir_52, target=R03G_15990, score=4, range=1192-1212,
strand=1
target 5' UGUUCUCCUUCUCCUUCUCCU 3'
: .....:
query 3' AGGAGGGGAAGAGGAAGGGGU 5'

```



query=novel\_mir\_52, target=R03G\_14329, score=4, range=54-74, strand=1  
target 5' UCAUCUUCUUCUUCUUCUCA 3'  
:: .....  
query 3' AGGAGGGGAAGAGGAAGGGGU 5'  
query=novel\_mir\_52, target=R03G\_05754, score=4, range=594-614, strand=-1  
target 5' UCUUCCUCUUCUCCUUCUUCU 3'  
.....  
query 3' AGGAGGGGAAGAGGAAGGGGU 5'  
query=novel\_mir\_52, target=R03G\_04370, score=4, range=426-446, strand=-1  
target 5' UCUUCCUCUUCUUCUUCUUCU 3'  
.....  
query 3' AGGAGGGGAAGAGGAAGGGGU 5'  
query=novel\_mir\_52, target=R03G\_04712, score=4, range=2625-2645, strand=-1  
target 5' UCCUCGUCUUCUUCUUCUCCUCG 3'  
.....  
query 3' AGGAGGGGAAGAGGAAGGGGU 5'  
query=novel\_mir\_52, target=R03G\_04174, score=4, range=480-500, strand=-1  
target 5' UCCUCUUCUUCUUCUUCUCCUCC 3'  
.....  
query 3' AGGAGGGGAAGAGGAAGGGGU 5'  
query=novel\_mir\_52, target=R03G\_11148, score=4, range=72-92, strand=1  
target 5' UCCUUCUCUUCUUCUUCUCCCC 3'  
.....  
query 3' AGGAGGGGAAGAGGAAGGGGU 5'  
query=novel\_mir\_52, target=R03G\_06602, score=4, range=114-134, strand=-1  
target 5' UCUUCCUCUUCUUCUUCUCCUCU 3'  
.....  
query 3' AGGAGGGGAAGAGGAAGGGGU 5'  
query=novel\_mir\_52, target=R03G\_13805, score=4, range=255-275, strand=-1  
target 5' UCCUCUUCUUCUUCUUCUCCUCU 3'  
.....  
query 3' AGGAGGGGAAGAGGAAGGGGU 5'  
query=novel\_mir\_52, target=R03G\_13800, score=4, range=255-275, strand=-1  
target 5' UCCUCUUCUUCUUCUUCUCCUCU 3'  
.....  
query 3' AGGAGGGGAAGAGGAAGGGGU 5'  
query=novel\_mir\_52, target=R03G\_14853, score=4, range=243-263, strand=-1

target 5' UCGUCUUCUUCUUCUUCUCA 3'  
:: .....  
query 3' AGGAGGGGAAGAGGAAGGGGU 5'  
query=novel\_mir\_52, target=R03G\_06986, score=4, range=165-184,  
strand=-1  
target 5' UCC-CUUCUUCUCCUCCUCC 3'  
::: .....  
query 3' AGGAGGGGAAGAGGAAGGGGU 5'  
query=novel\_mir\_52, target=R03G\_08412, score=4, range=597-617,  
strand=-1  
target 5' UCCUCUUCUUCUUCUCCUCU 3'  
:.....  
query 3' AGGAGGGGAAGAGGAAGGGGU 5'  
query=novel\_mir\_15, target=R03G\_12101, score=1.5, range=1003-1024  
strand=1  
target 5' GAAAAGAAGAAGAAGAAGGAGA 3'  
:.....  
query 3' CUUUUCUUUUUCUUUUCCUCU 5'  
query=novel\_mir\_15, target=R03G\_06159, score=2, range=1402-1423,  
strand=1  
target 5' GAAAAGAAAGAGAAGAAGGAGA 3'  
:.....  
query 3' CUUUUCUUUUUCUUUUCCUCU 5'  
query=novel\_mir\_15, target=R03G\_13440, score=2, range=790-811,  
strand=1  
target 5' GAAAGGGAAAGGAAAAAGGAGA 3'  
:.....  
query 3' CUUUUCUUUUUCUUUUCCUCU 5'  
query=novel\_mir\_15, target=R03G\_04457, score=2, range=112-133,  
strand=1  
target 5' GAAAAGAAGGAGAAAAAGGAGG 3'  
:.....  
query 3' CUUUUCUUUUUCUUUUCCUCU 5'  
query=novel\_mir\_15, target=R03G\_03214, score=2, range=316-337,  
strand=1  
target 5' GAAAAGAAAAGAAAAGGAAA 3'  
:..... :  
query 3' CUUUUCUUUUUCUUUUCCUCU 5'  
query=novel\_mir\_15, target=R03G\_07351, score=2, range=814-835,  
strand=1  
target 5' GAAAGAGAAAAGAAAAGGAGA 3'  
:..... :  
query 3' CUUUUCUUUUUCUUUUCCUCU 5'  
query=novel\_mir\_15, target=R03G\_09778, score=2, range=1440-1461,  
strand=1

target 5' GAAAUCAAAAAGAAAAGGAGA 3'  
:::: :  
query 3' CUUUUCUUUUUCUUUUUCCUCU 5'  
query=novel\_mir\_15, target=R03G\_07561, score=2.5, range=175-196,  
strand=1  
target 5' GAGAAGAAAGAGAAGAAGGAGA 3'  
:.  
query 3' CUUUUCUUUUUCUUUUUCCUCU 5'  
query=novel\_mir\_15, target=R03G\_15120, score=2.5, range=445-466,  
strand=1  
target 5' CGAGAGGAAAAGAAAAGGAGA 3'  
..  
query 3' CUUUUCUUUUUCUUUUUCCUCU 5'  
query=novel\_mir\_15, target=R03G\_07217, score=2.5, range=367-388,  
strand=1  
target 5' AAGAAGGAAAAGAAAAGGAGG 3'  
:.  
query 3' CUUUUCUUUUUCUUUUUCCUCU 5'  
query=novel\_mir\_15, target=R03G\_11390, score=2.5, range=274-295,  
strand=1  
target 5' GAAAAGAAGAAGAAAAGAAGA 3'  
:.  
query 3' CUUUUCUUUUUCUUUUUCCUCU 5'  
query=novel\_mir\_15, target=R03G\_15845, score=2.5, range=1531-1552  
strand=1  
target 5' GAAAGGCAAAGGAAAAGGAGA 3'  
:.  
query 3' CUUUUCUUUUUCUUUUUCCUCU 5'  
query=novel\_mir\_15, target=R03G\_11914, score=2.5, range=238-259,  
strand=1  
target 5' GAAAAAGAAGGAAAAGGAGA 3'  
:.  
query 3' CUUUUCUUUUUCUUUUUCCUCU 5'  
query=novel\_mir\_15, target=R03G\_08620, score=3, range=193-214,  
strand=1  
target 5' GAGAAGAAGGAGAAGAAGGAGA 3'  
:.  
query 3' CUUUUCUUUUUCUUUUUCCUCU 5'  
query=novel\_mir\_15, target=R03G\_04550, score=3, range=1217-1238,  
strand=1  
target 5' AAGAAGAAGAAGAAGAAGGAGA 3'  
:.  
query 3' CUUUUCUUUUUCUUUUUCCUCU 5'  
query=novel\_mir\_15, target=R03G\_00983, score=3, range=266-287,  
strand=1

target 5' AAGAAGAAGAAGAAGAAGGAGA 3'  
:.....  
query 3' CUUUUCUUUUUCUUUUUCCUCU 5'  
query=novel\_mir\_15, target=R03G\_11096, score=3, range=2365-2387,  
strand=1  
target 5' GAAAAGAAAAAGCAAGAAGGAGA 3'  
:.....  
query 3' CUUUUCUUUUUC-UUUUUCCUCU 5'  
query=novel\_mir\_15, target=R03G\_11135, score=3, range=217-238,  
strand=1  
target 5' GAAAAGAAGAAUAAAAAGGAGG 3'  
:.....  
query 3' CUUUUCUUUUUCUUUUUCCUCU 5'  
query=novel\_mir\_15, target=R03G\_05857, score=3, range=43-64, stra  
target 5' GAAAAGAAGAAGAAAAAGAAGG 3'  
:.....  
query 3' CUUUUCUUUUUCUUUUUCCUCU 5'  
query=novel\_mir\_15, target=R03G\_14544, score=3, range=1243-1265,  
strand=1  
target 5' GAAGACGAAGAAGAAGAAGGAGA 3'  
:.....  
query 3' CUUUU-CUUUUUCUUUUUCCUCU 5'  
query=novel\_mir\_15, target=R03G\_13511, score=3, range=218-239,  
strand=1  
target 5' GUGAAGAAGAAGAAGAAGGAGA 3'  
:.....  
query 3' CUUUUCUUUUUCUUUUUCCUCU 5'  
query=novel\_mir\_15, target=R03G\_07923, score=3, range=572-593,  
strand=1  
target 5' AAAAAGAAAAACAAAAAGGAGA 3'  
:.....  
query 3' CUUUUCUUUUUCUUUUUCCUCU 5'  
query=novel\_mir\_15, target=R03G\_07173, score=3, range=82-104, str  
target 5' GAAAAGAAAGAAGGAAAAGGAGC 3'  
:.....  
query 3' CUUUUCUUU-UUCUUUUUCCUCU 5'  
query=novel\_mir\_15, target=R03G\_03488, score=3, range=1633-1653,  
strand=1  
target 5' GAGAAGAAGAAGAAAAA-GAGA 3'  
:.....  
query 3' CUUUUCUUUUUCUUUUUCCUCU 5'  
query=novel\_mir\_15, target=R03G\_10586, score=3, range=115-136,  
strand=1  
target 5' GCAGUGGAAAAGAAAAAGGAGA 3'  
: .. :.....

query 3' CUUUUCUUUUUCUUUUUCCUCU 5'  
query=novel\_mir\_15, target=R03G\_04404, score=3, range=943-964,  
strand=1  
target 5' GUAGAAAAGAAGAAAAGGAGA 3'  
: :: ::::::::::::::::::::  
query 3' CUUUUCUUUUUCUUUUUCCUCU 5'  
query=novel\_mir\_15, target=R03G\_00993, score=3, range=571-592,  
strand=1  
target 5' GAUAAGAAAAGAAAAGAAGA 3'  
:: :::::::::::::::::::: :::  
query 3' CUUUUCUUUUUCUUUUUCCUCU 5'  
query=novel\_mir\_15, target=R03G\_11149, score=3, range=34-55, stra  
target 5' GAAAAAAAAAAGAAAAAGAGA 3'  
::::: :::::::::::::::::::: :::::  
query 3' CUUUUCUUUUUCUUUUUCCUCU 5'  
query=novel\_mir\_15, target=R03G\_15565, score=3.5, range=688-709,  
strand=1  
target 5' GAAAAGAAGAAGAAGAGGGAGC 3'  
:::::::::::::::::::::::::::  
query 3' CUUUUCUUUUUCUUUUUCCUCU 5'  
query=novel\_mir\_15, target=R03G\_06674, score=3.5, range=335-356,  
strand=1  
target 5' UAAGAGAAAAGGAAGAAGGAGA 3'  
:::::::::::::::::::::::::::  
query 3' CUUUUCUUUUUCUUUUUCCUCU 5'  
query=novel\_mir\_15, target=R03G\_11418, score=3.5, range=1442-1463  
strand=1  
target 5' GAAAAGAGAAAGAAAGAGAAGA 3'  
:::::::::::::::::::::::::: :::  
query 3' CUUUUCUUUUUCUUUUUCCUCU 5'  
query=novel\_mir\_15, target=R03G\_05103, score=3.5, range=1103-1124  
strand=1  
target 5' GAAAAGAAGAAGAAAAGGGACA 3'  
:::::::::::::::::::::::::: :  
query 3' CUUUUCUUUUUCUUUUUCCUCU 5'  
query=novel\_mir\_15, target=R03G\_04274, score=3.5, range=1024-1045  
strand=1  
target 5' GAAAAGAAAAGAAAGAAGAAGG 3'  
:::::::::::::::::::::::::: ::.  
query 3' CUUUUCUUUUUCUUUUUCCUCU 5'  
query=novel\_mir\_15, target=R03G\_15554, score=3.5, range=497-518,  
strand=1  
target 5' GAGAAGAAAAGAAAGAGAAGA 3'  
:::::::::::::::::::::::::: :::  
query 3' CUUUUCUUUUUCUUUUUCCUCU 5'

query=novel\_mir\_15, target=R03G\_02859, score=3.5, range=700-721,  
strand=1  
target 5' GAAAAGAAAAGAAGAAGGUGG 3'  
:.....: :.  
query 3' CUUUUCUUUUUCUUUUUCCUCU 5'  
query=novel\_mir\_15, target=R03G\_00993, score=3.5, range=814-835,  
strand=1  
target 5' GAAAAGAAGAAGAAGAAGGAUA 3'  
:.....: :  
query 3' CUUUUCUUUUUCUUUUUCCUCU 5'  
query=novel\_mir\_15, target=R03G\_17074, score=3.5, range=34-55,  
strand=1  
target 5' GAGAAGAAAGAGAAAAGGAAA 3'  
:.....: :  
query 3' CUUUUCUUUUUCUUUUUCCUCU 5'  
query=novel\_mir\_15, target=R03G\_06643, score=3.5, range=637-659,  
strand=1  
target 5' GAAGAUGAAGAAGAAAAGGGAGG 3'  
:..: :.....: :.  
query 3' CUUUU-CUUUUUCUUUUUCCUCU 5'  
query=novel\_mir\_15, target=R03G\_04246, score=3.5, range=394-415,  
strand=1  
target 5' GACAAGGAAAAGAAGGAGGAGA 3'  
: :.....: :  
query 3' CUUUUCUUUUUCUUUUUCCUCU 5'  
query=novel\_mir\_15, target=R03G\_13159, score=3.5, range=919-940,  
strand=1  
target 5' GAGGAAGAAGAGAAAAGGAGA 3'  
:..: :.....: :  
query 3' CUUUUCUUUUUCUUUUUCCUCU 5'  
query=novel\_mir\_15, target=R03G\_06204, score=3.5, range=3382-3403  
strand=1  
target 5' AAGAAGAAAAGAAAAGAAGA 3'  
:.....: : :  
query 3' CUUUUCUUUUUCUUUUUCCUCU 5'  
query=novel\_mir\_15, target=R03G\_10854, score=3.5, range=1781-1802  
strand=1  
target 5' CAAAAGAAGAAGAAAAGAAGA 3'  
:.....: : :  
query 3' CUUUUCUUUUUCUUUUUCCUCU 5'  
query=novel\_mir\_15, target=R03G\_05804, score=3.5, range=208-229,  
strand=1  
target 5' GAAGAAGAAGAGAAAAGGAGG 3'  
:..: :.....: :.  
query 3' CUUUUCUUUUUCUUUUUCCUCU 5'



query=novel\_mir\_15, target=R03G\_00529, score=3.5, range=1073-1094  
strand=1  
target 5' GAAGAGAAAAGAAAAGAAGU 3'  
:::.....::  
query 3' CUUUUCUUUUUCUUUUUCCUCU 5'

query=novel\_mir\_15, target=R03G\_15117, score=3.5, range=26-47,  
strand=1  
target 5' CAAAAGAGAAAAGAAAAGGAAA 3'  
:.....:  
query 3' CUUUUCUUUUUCUUUUUCCUCU 5'

query=novel\_mir\_15, target=R03G\_15706, score=3.5, range=514-535,  
strand=1  
target 5' GAUCAGAAAAGAAGAAGGAGG 3'  
:: .....  
query 3' CUUUUCUUUUUCUUUUUCCUCU 5'

query=novel\_mir\_15, target=R03G\_09672, score=3.5, range=22-44,  
strand=1  
target 5' GGAAAGAAAGAAGAAAAGAAGA 3'  
:.....:::  
query 3' CUUUUCUUU-UUCUUUUUCCUCU 5'

query=novel\_mir\_15, target=R03G\_02549, score=3.5, range=214-236,  
strand=1  
target 5' GAAACAGAAGAAGAAAAGAAGA 3'  
:::: .....:::  
query 3' CUUU-UCUUUUUCUUUUUCCUCU 5'

query=novel\_mir\_15, target=R03G\_08748, score=3.5, range=385-406,  
strand=1  
target 5' GAAGAAAAAAGAAAAGAAGA 3'  
:::: .....:::  
query 3' CUUUUCUUUUUCUUUUUCCUCU 5'

query=novel\_mir\_15, target=R03G\_04831, score=3.5, range=1370-1390  
strand=1  
target 5' UAAAAGAAGAAG-AAAAGGAGA 3'  
:.....:::  
query 3' CUUUUCUUUUUCUUUUUCCUCU 5'

query=novel\_mir\_15, target=R03G\_03207, score=3.5, range=169-190,  
strand=1  
target 5' GAAGCGAAAAGAAAAGAAGA 3'  
:.....:::  
query 3' CUUUUCUUUUUCUUUUUCCUCU 5'

query=novel\_mir\_15, target=R03G\_04313, score=3.5, range=184-204,  
strand=1  
target 5' AAAAGAAGAAGAAAAA-GAGA 3'  
:.....::::  
query 3' CUUUUCUUUUUCUUUUUCCUCU 5'

query=novel\_mir\_15, target=R03G\_15702, score=3.5, range=202-222,  
strand=1  
target 5' CAAGAGAAAAGAAAAA-GAGA 3'  
:.....: :  
query 3' CUUUUCUUUUUCUUUUUCCUCU 5'  
query=novel\_mir\_15, target=R03G\_00824, score=3.5, range=510-530,  
strand=1  
target 5' GAAGAG-AAAAGAAAAGGAAA 3'  
:.....: :  
query 3' CUUUUCUUUUUCUUUUUCCUCU 5'  
query=novel\_mir\_15, target=R03G\_17074, score=3.5, range=142-163,  
strand=1  
target 5' GAAAAGAAAGAGAAAAGAAGG 3'  
:.....: :.  
query 3' CUUUUCUUUUUCUUUUUCCUCU 5'  
query=novel\_mir\_15, target=R03G\_07178, score=3.5, range=1273-1294  
strand=-1  
target 5' AAGAAGAAAGAGAAGAAGGAGA 3'  
:.....: :  
query 3' CUUUUCUUUUUCUUUUUCCUCU 5'  
query=novel\_mir\_15, target=R03G\_13980, score=3.5, range=1261-1282  
strand=-1  
target 5' GACAAGAGAAAGAAAAGCAGA 3'  
: :.....: :  
query 3' CUUUUCUUUUUCUUUUUCCUCU 5'  
query=novel\_mir\_15, target=R03G\_15034, score=4, range=1378-1399,  
strand=1  
target 5' GAAAAGAAAGAGAAGAAGGAAA 3'  
:.....: :  
query 3' CUUUUCUUUUUCUUUUUCCUCU 5'  
query=novel\_mir\_15, target=R03G\_09019, score=4, range=17-38, stra  
target 5' GAGGAGAAAAGAAAAGGAAGA 3'  
:.....: :  
query 3' CUUUUCUUUUUCUUUUUCCUCU 5'  
query=novel\_mir\_15, target=R03G\_08165, score=4, range=718-739,  
strand=1  
target 5' GAAAAGAAAGAGAAAGAGGAAA 3'  
:.....: :  
query 3' CUUUUCUUUUUCUUUUUCCUCU 5'  
query=novel\_mir\_15, target=R03G\_09426, score=4, range=1682-1703,  
strand=1  
target 5' GAAGAGGAAAAGAAGAAGUAGA 3'  
:.....: :  
query 3' CUUUUCUUUUUCUUUUUCCUCU 5'  
query=novel\_mir\_15, target=R03G\_10605, score=4, range=88-109, str

target 5' GAAAAGAAAAAGAAGAAGGGAA 3'  
 ..... :  
 query 3' CUUUUCUUUUUCUUUUUCCUCU 5'  
 query=novel\_mir\_15, target=R03G\_16682, score=4, range=199-221,  
 strand=1  
 target 5' GGAAAGAAGAAGGAAAAGGAAGA 3'  
 ..... :  
 query 3' CUUUUCUUUUUCUUUUUCC-UCU 5'  
 query=novel\_mir\_15, target=R03G\_06299, score=4, range=596-617,  
 strand=1  
 target 5' GAGAAGAGAAAGAAAGAAGAGA 3'  
 ..... :  
 query 3' CUUUUCUUUUUCUUUUUCCUCU 5'  
 query=novel\_mir\_15, target=R03G\_15181, score=4, range=2172-2194,  
 strand=1  
 target 5' GGAAAGAAGAAAGAAGGAGGAGG 3'  
 ..... :  
 query 3' CUUUUCUU-UUUCUUUUUCCUCU 5'  
 query=novel\_mir\_15, target=R03G\_09868, score=4, range=374-395,  
 strand=1  
 target 5' GAGAAGAAGAAGAAGAAGAAGA 3'  
 ..... :  
 query 3' CUUUUCUUUUUCUUUUUCCUCU 5'  
 query=novel\_mir\_15, target=R03G\_09371, score=4, range=740-761,  
 strand=1  
 target 5' GAAAAGAUGAAGGAAGGAGGAGG 3'  
 ..... :  
 query 3' CUUUUCUUUUUCUUUUUCCUCU 5'  
 query=novel\_mir\_15, target=R03G\_16926, score=4, range=383-405,  
 strand=1  
 target 5' GAGAAGAAGAAGAAGAAGUGAGA 3'  
 ..... :  
 query 3' CUUUUCUUUUUCUUUUUC-CUCU 5'  
 query=novel\_mir\_15, target=R03G\_12853, score=4, range=115-137,  
 strand=1  
 target 5' GAAGACGAAGAGGAAGAAGGAGA 3'  
 ..... :  
 query 3' CUUUU-CUUUUUCUUUUUCCUCU 5'  
 query=novel\_mir\_15, target=R03G\_15526, score=4, range=583-605,  
 strand=1  
 target 5' GAGGAGAGAAAGAAAAGAGAGG 3'  
 ..... :  
 query 3' CUUUUCUUUUUCUUUUUC-CUCU 5'  
 query=novel\_mir\_15, target=R03G\_16999, score=4, range=695-716,  
 strand=1

target 5' AAGAAGAAGAAGAAAAGAAGA 3'  
:.....: : : :  
query 3' CUUUUCUUUUUCUUUUUCCUCU 5'  
query=novel\_mir\_15, target=R03G\_02771, score=4, range=344-365,  
strand=1  
target 5' CAAAAGAAAAGGAAAAGCAGA 3'  
:.....: : : :  
query 3' CUUUUCUUUUUCUUUUUCCUCU 5'  
query=novel\_mir\_15, target=R03G\_09061, score=4, range=2147-2168,  
strand=1  
target 5' AAGAAGAAGAAGAAAAGAAGA 3'  
:.....: : : :  
query 3' CUUUUCUUUUUCUUUUUCCUCU 5'  
query=novel\_mir\_15, target=R03G\_03964, score=4, range=1051-1073,  
strand=1  
target 5' GAAAAUAAAAGGAAAAGGAAGA 3'  
: : : : :.....: : : :  
query 3' CUUUUCUUUUUCUUUUUCC-UCU 5'  
query=novel\_mir\_15, target=R03G\_04037, score=4, range=505-526,  
strand=1  
target 5' AAAAAGAAAAGAAAGAGGAAA 3'  
:.....: :  
query 3' CUUUUCUUUUUCUUUUUCCUCU 5'  
query=novel\_mir\_15, target=R03G\_02855, score=4, range=536-557,  
strand=1  
target 5' AGGAAGAAAAGAAAAGAAGA 3'  
.....: : : :  
query 3' CUUUUCUUUUUCUUUUUCCUCU 5'  
query=novel\_mir\_15, target=R03G\_06480, score=4, range=392-413,  
strand=1  
target 5' CAAAAGAAAAGAAAGAAGAAGA 3'  
:.....: : : :  
query 3' CUUUUCUUUUUCUUUUUCCUCU 5'  
query=novel\_mir\_15, target=R03G\_02244, score=4, range=143-164,  
strand=1  
target 5' CAGCAGGAAAAGAAAGGAGA 3'  
: : :.....: : : : :  
query 3' CUUUUCUUUUUCUUUUUCCUCU 5'  
query=novel\_mir\_15, target=R03G\_03381, score=4, range=1639-1660,  
strand=1  
target 5' AAGAAGAUGAAGAGAAAGGAGA 3'  
: : : : :.....: : : : :  
query 3' CUUUUCUUUUUCUUUUUCCUCU 5'  
query=novel\_mir\_15, target=R03G\_06032, score=4, range=350-371,  
strand=1

```

target 5' AAAAGGAAGAAGAAAAGAAGA 3'
:::::
query 3' CUUUUCUUUUUCUUUUUCCUCU 5'
query=novel_mir_15, target=R03G_05321, score=4, range=1095-1117,
strand=1
target 5' AAAGAGCGAAAAGGAAAAGGAGA 3'
::::.
query 3' CUUUUC-UUUUUCUUUUUCCUCU 5'
query=novel_mir_15, target=R03G_07072, score=4, range=437-458,
strand=1
target 5' AAAAGGAAGAAGAAAAGAAGA 3'
:::::
query 3' CUUUUCUUUUUCUUUUUCCUCU 5'
query=novel_mir_15, target=R03G_15727, score=4, range=169-190,
strand=1
target 5' GGAAAAAAGAAGAAAAGGAAA 3'
::::.
query 3' CUUUUCUUUUUCUUUUUCCUCU 5'
query=novel_mir_15, target=R03G_13255, score=4, range=197-218,
strand=1
target 5' AAGAAGAAGAAGAACAAGGAGA 3'
:::::
query 3' CUUUUCUUUUUCUUUUUCCUCU 5'
query=novel_mir_15, target=R03G_10412, score=4, range=580-601,
strand=1
target 5' GAAAAGAAAAGAAUAAGGAAA 3'
:::::
query 3' CUUUUCUUUUUCUUUUUCCUCU 5'
query=novel_mir_15, target=R03G_01819, score=4, range=1282-1303,
strand=1
target 5' GAAAGAGAAAAGAAAAGGACA 3'
::::.
query 3' CUUUUCUUUUUCUUUUUCCUCU 5'
query=novel_mir_15, target=R03G_01918, score=4, range=771-792,
strand=1
target 5' GAUAACAAAAGAAGAAGGGGA 3'
:::
query 3' CUUUUCUUUUUCUUUUUCCUCU 5'
query=novel_mir_15, target=R03G_03921, score=4, range=1801-1822,
strand=1
target 5' GAAGUAAAGGAGAAAAGGAGA 3'
:::.
query 3' CUUUUCUUUUUCUUUUUCCUCU 5'
query=novel_mir_15, target=R03G_06459, score=4, range=136-158,
strand=1

```

target 5' GAAAAGAAAAAGAAAAAGAAGA 3'  
: : : : : : : : : : : :  
query 3' CUUUUCUUUUUC-UUUUUCCUCU 5'  
query=novel\_mir\_15, target=R03G\_03670, score=4, range=195-217,  
strand=1  
target 5' GAGCAAGGAAAAGAAAAAGGAUA 3'  
: : : : : : : : : : : :  
query 3' CUU-UUCUUUUUCUUUUCCUCU 5'  
query=novel\_mir\_15, target=R03G\_09435, score=4, range=209-230,  
strand=1  
target 5' GUAAAGGAAAAGAAAAAGAAGG 3'  
: : : : : : : : : : : :  
query 3' CUUUUCUUUUUCUUUUCCUCU 5'  
query=novel\_mir\_15, target=R03G\_05319, score=4, range=826-848,  
strand=1  
target 5' GAAGAAAAGAAGAAAAAAGGAGA 3'  
: : : : : : : : : : : :  
query 3' CUUUUCUUUUUC-UUUUUCCUCU 5'  
query=novel\_mir\_15, target=R03G\_04077, score=4, range=10-31, str  
target 5' GAAAAACAAGAGAAGAAGGAGA 3'  
: : : : : : : : : : : :  
query 3' CUUUUCUUUUUCUUUUCCUCU 5'  
query=novel\_mir\_15, target=R03G\_05746, score=4, range=310-331,  
strand=1  
target 5' GAAAGGACAAUGAAAAAGGAGG 3'  
: : : : : : : : : : : :  
query 3' CUUUUCUUUUUCUUUUCCUCU 5'  
query=novel\_mir\_15, target=R03G\_14076, score=4, range=430-451,  
strand=1  
target 5' GAAGAAAAGAAGAAAAAGAAGA 3'  
: : : : : : : : : : : :  
query 3' CUUUUCUUUUUCUUUUCCUCU 5'  
query=novel\_mir\_15, target=R03G\_13396, score=4, range=109-130,  
strand=1  
target 5' GAAGAAGAAAAGAAAAAGAAGA 3'  
: : : : : : : : : : : :  
query 3' CUUUUCUUUUUCUUUUCCUCU 5'  
query=novel\_mir\_15, target=R03G\_14284, score=4, range=1121-1142,  
strand=1  
target 5' UAAAACAAAAGACAAGGAGA 3'  
: : : : : : : : : : : :  
query 3' CUUUUCUUUUUCUUUUCCUCU 5'  
query=novel\_mir\_15, target=R03G\_08798, score=4, range=365-386,  
strand=1  
target 5' AAUAGAAAAGAAAAGGAAA 3'

```

:: : : : : : : : : : : :
query 3' CUUUUCUUUUUCUUUUUCCUCU 5'
query=novel_mir_15, target=R03G_00518, score=4, range=188-208,
strand=1
target 5' CAAGAGAGAAAGAAAAA-GAGA 3'
: : : : : : : : : : : :
query 3' CUUUUCUUUUUCUUUUUCCUCU 5'
query=novel_mir_15, target=R03G_17095, score=4, range=505-527,
strand=1
target 5' GAUAAUUAUAAAAGAAGAAGGAGA 3'
: : : : : : : : : : : :
query 3' CUUUUCU-UUUUCUUUUUCCUCU 5'
query=novel_mir_15, target=R03G_13440, score=4, range=1081-1102,
strand=1
target 5' GAAAAGAAAAAGAAGAGGAGA 3'
: : : : : : : : : : : :
query 3' CUUUUCUUUUUCUUUUUCCUCU 5'
query=novel_mir_15, target=R03G_04550, score=4, range=443-464,
strand=1
target 5' GAGAAGAAGAAGAAGAAGAAGA 3'
: : : : : : : : : : : :
query 3' CUUUUCUUUUUCUUUUUCCUCU 5'
query=novel_mir_15, target=R03G_07217, score=4, range=472-493,
strand=1
target 5' GAAAAGAAGAAGAAGAAGAAGG 3'
: : : : : : : : : : : :
query 3' CUUUUCUUUUUCUUUUUCCUCU 5'
query=novel_mir_15, target=R03G_00993, score=4, range=709-730,
strand=1
target 5' AAAAAGAAAAAGAAGAAGAAGA 3'
: : : : : : : : : : : :
query 3' CUUUUCUUUUUCUUUUUCCUCU 5'
query=novel_mir_15, target=R03G_15181, score=4, range=780-801,
strand=1
target 5' GGAACAAGAAAGAAGAAGGAGA 3'
: : : : : : : : : : : :
query 3' CUUUUCUUUUUCUUUUUCCUCU 5'
query=novel_mir_15, target=R03G_07217, score=4, range=421-442,
strand=1
target 5' GAAAAGAAGAAGAAGAAGAAGG 3'
: : : : : : : : : : : :
query 3' CUUUUCUUUUUCUUUUUCCUCU 5'
query=novel_mir_15, target=R03G_00993, score=4, range=457-478,
strand=1
target 5' GAAAAAAAAAGAAGAAGAAGA 3'

```

::::: :::::::::::::: :::  
query 3' CUUUUCUUUUUCUUUUUCCUCU 5'  
query=novel\_mir\_15, target=R03G\_16098, score=4, range=1105-1126,  
strand=-1  
target 5' GAGAAGAAGAACAAGAAGGAGA 3'  
::::: :::::::::::::: :::  
query 3' CUUUUCUUUUUCUUUUUCCUCU 5'  
query=novel\_mir\_15, target=R03G\_12967, score=4, range=871-892,  
strand=-1  
target 5' GAGAAGCAAAGAAGAAGGGGG 3'  
::::: :::::::::::::: :::  
query 3' CUUUUCUUUUUCUUUUUCCUCU 5'  
query=novel\_mir\_15, target=R03G\_07736, score=4, range=871-892,  
strand=-1  
target 5' GAGAAGCAAAGAAGAAGGGGG 3'  
::::: :::::::::::::: :::  
query 3' CUUUUCUUUUUCUUUUUCCUCU 5'  
query=novel\_mir\_15, target=R03G\_16358, score=4, range=700-721,  
strand=-1  
target 5' GAGAAGCAAAGAAGAAGGGGG 3'  
::::: :::::::::::::: :::  
query 3' CUUUUCUUUUUCUUUUUCCUCU 5'  
query=novel\_mir\_67, target=R03G\_07834, score=0, range=1150-1171,  
strand=1  
target 5' AAGUCUGAAAGAAGCCGUGUA 3'  
::::: :::::::::::::: :::  
query 3' UUCAGACUUUCUUCGGCGACAU 5'  
query=novel\_mir\_67, target=R03G\_08467, score=1, range=790-811,  
strand=1  
target 5' AAGUCUGAAAGAAGUCGUGUA 3'  
::::: :::::::::::::: :::  
query 3' UUCAGACUUUCUUCGGCGACAU 5'  
query=novel\_mir\_122, target=R03G\_16618, score=0, range=2263-2282,  
strand=1  
target 5' CAACAGCAGCAGCAGAUGCA 3'  
::::: :::::::::::::: :::  
query 3' GUUGUCGUCGUCGUCUACGU 5'  
query=novel\_mir\_122, target=R03G\_00202, score=0, range=581-600,  
strand=1  
target 5' CAACAGCAGCAGCAGAUGCA 3'  
::::: :::::::::::::: :::  
query 3' GUUGUCGUCGUCGUCUACGU 5'  
query=novel\_mir\_122, target=R03G\_01848, score=2, range=75-94,  
strand=-1  
target 5' GAGUAGCAGCAGCAGAUGCA 3'



```
.....:
query 3' GUUGUCGUCGUCGUCUACGU 5'
query=novel_mir_122, target=R03G_01884, score=2, range=75-94,
strand=-1
target 5' GAGUAGCAGCAGCAGAUGCA 3'
.....:
query 3' GUUGUCGUCGUCGUCUACGU 5'
query=novel_mir_122, target=R03G_16322, score=2.5, range=790-809,
strand=1
target 5' CAACAGCAGCAGCAGAAGCG 3'
.....:
query 3' GUUGUCGUCGUCGUCUACGU 5'
query=novel_mir_122, target=R03G_04003, score=2.5, range=1879-189
strand=1
target 5' CAGCAGCAGCAGCAGAUUCA 3'
.....:
query 3' GUUGUCGUCGUCGUCUACGU 5'
query=novel_mir_122, target=R03G_13611, score=2.5, range=746-764,
strand=1
target 5' CAGCAGCAGCAGCAGA-GCA 3'
.....:
query 3' GUUGUCGUCGUCGUCUACGU 5'
query=novel_mir_122, target=R03G_04553, score=2.5, range=894-913,
strand=-1
target 5' CAGCAGCAGCAGCAGGUGUA 3'
.....:
query 3' GUUGUCGUCGUCGUCUACGU 5'
query=novel_mir_122, target=R03G_07798, score=2.5, range=252-271,
strand=-1
target 5' CAGCAGCAGCAGCAGAAGCA 3'
.....:
query 3' GUUGUCGUCGUCGUCUACGU 5'
query=novel_mir_122, target=R03G_05072, score=3, range=412-432,
strand=1
target 5' CAAUGGCAAGCAGUAGAUGCA 3'
.....:
query 3' GUUGUCG-UCGUCGUCUACGU 5'
query=novel_mir_122, target=R03G_01092, score=3, range=463-482,
strand=1
target 5' CAACAACAACAGCAGAUGCA 3'
.....:
query 3' GUUGUCGUCGUCGUCUACGU 5'
query=novel_mir_122, target=R03G_04444, score=3, range=1033-1051,
strand=1
target 5' AAACAGCAGCAGCAGAU-CA 3'
```

```
..... ::
query 3' GUUGUCGUCGUCGUCUACGU 5'
query=novel_mir_122, target=R03G_13435, score=3, range=78-97,
strand=-1
target 5' CAGCAGUAGCAGUAGAUGUA 3'
.....:
query 3' GUUGUCGUCGUCGUCUACGU 5'
query=novel_mir_122, target=R03G_09454, score=3, range=6501-6520,
strand=-1
target 5' UAAGGGCAGCAGCAGAUGUA 3'
.:: .....:
query 3' GUUGUCGUCGUCGUCUACGU 5'
query=novel_mir_122, target=R03G_02187, score=3, range=1159-1177,
strand=-1
target 5' CAACAGCAGCAGCAGA-GCU 3'
.....: ::
query 3' GUUGUCGUCGUCGUCUACGU 5'
query=novel_mir_122, target=R03G_07862, score=3, range=456-474,
strand=-1
target 5' CAA-AGGAGCAGCGGAUGCA 3'
::: :: .....:
query 3' GUUGUCGUCGUCGUCUACGU 5'
query=novel_mir_122, target=R03G_11979, score=3, range=456-474,
strand=-1
target 5' CAA-AGGAGCAGCGGAUGCA 3'
::: :: .....:
query 3' GUUGUCGUCGUCGUCUACGU 5'
query=novel_mir_122, target=R03G_10532, score=3, range=342-360,
strand=-1
target 5' CAA-AGGAGCAGCGGAUGCA 3'
::: :: .....:
query 3' GUUGUCGUCGUCGUCUACGU 5'
query=novel_mir_122, target=R03G_10747, score=3, range=456-474,
strand=-1
target 5' CAA-AGGAGCAGCGGAUGCA 3'
::: :: .....:
query 3' GUUGUCGUCGUCGUCUACGU 5'
query=novel_mir_122, target=R03G_17218, score=3, range=342-360,
strand=-1
target 5' CAA-AGGAGCAGCGGAUGCA 3'
::: :: .....:
query 3' GUUGUCGUCGUCGUCUACGU 5'
query=novel_mir_122, target=R03G_10746, score=3, range=810-828,
strand=-1
target 5' CAA-AGGAGCAGCGGAUGCA 3'
```

::: :: :::::::::::::::  
query 3' GUUGUCGUCGUCGUCUACGU 5'  
query=novel\_mir\_122, target=R03G\_04733, score=3.5, range=1291-131  
strand=1  
target 5' CAGCAGCAGCAGCAGGUGGA 3'  
:::::::::::::::::: :  
query 3' GUUGUCGUCGUCGUCUACGU 5'  
query=novel\_mir\_122, target=R03G\_15840, score=3.5, range=6036-605  
strand=1  
target 5' UAACAGCAGCAGCGGAUCGCA 3'  
.:::::::::::::::::: :::  
query 3' GUUGUCGUCGUCGUCUA-CGU 5'  
query=novel\_mir\_122, target=R03G\_00640, score=3.5, range=1240-126  
strand=1  
target 5' CAGCAGCAGCAGCAGAUGAUA 3'  
:::::::::::::::::: .:  
query 3' GUUGUCGUCGUCGUCUAC-GU 5'  
query=novel\_mir\_122, target=R03G\_12743, score=3.5, range=565-584,  
strand=1  
target 5' GAGCAGCAGCAGCAGAUUCA 3'  
:::::::::::::::::: ::  
query 3' GUUGUCGUCGUCGUCUACGU 5'  
query=novel\_mir\_122, target=R03G\_05425, score=3.5, range=346-365,  
strand=1  
target 5' CUGCAGCAGCAGCAGAAGCA 3'  
: .:::::::::::::::::: :::  
query 3' GUUGUCGUCGUCGUCUACGU 5'  
query=novel\_mir\_122, target=R03G\_11464, score=3.5, range=622-641,  
strand=1  
target 5' CGUGAGCAGCAGCAGAUGCU 3'  
:. ::::::::::::::::::::  
query 3' GUUGUCGUCGUCGUCUACGU 5'  
query=novel\_mir\_122, target=R03G\_07350, score=3.5, range=444-462,  
strand=1  
target 5' UAA-AGAAGCAGCAGAUGCU 3'  
.::: :: ::::::::::::::::::::  
query 3' GUUGUCGUCGUCGUCUACGU 5'  
query=novel\_mir\_122, target=R03G\_13438, score=3.5, range=360-378,  
strand=1  
target 5' UAA-AGAAGCAGCAGAUGCU 3'  
.::: :: ::::::::::::::::::::  
query 3' GUUGUCGUCGUCGUCUACGU 5'  
query=novel\_mir\_122, target=R03G\_13835, score=3.5, range=15879-15  
strand=-1  
target 5' CAAUAGCGGCAGCAGCUGCA 3'

```
..... : : : :
query 3' GUUGUCGUCGUCGUCUACGU 5'
query=novel_mir_122, target=R03G_11504, score=3.5, range=213-232,
strand=-1
target 5' CAGCAGCAGCAGCAGGAGCA 3'
..... : : : :
query 3' GUUGUCGUCGUCGUCUACGU 5'
query=novel_mir_122, target=R03G_02764, score=3.5, range=213-232,
strand=-1
target 5' CAGCAGCAGCAGCAGGAGCA 3'
..... : : : :
query 3' GUUGUCGUCGUCGUCUACGU 5'
query=novel_mir_122, target=R03G_00441, score=3.5, range=399-418,
strand=-1
target 5' UGGCAGCAGCAGCAGAUACA 3'
..... : :
query 3' GUUGUCGUCGUCGUCUACGU 5'
query=novel_mir_122, target=R03G_10654, score=3.5, range=276-295,
strand=-1
target 5' UGGGAGCAGCAGCAGGUGCA 3'
... : : : : : : : :
query 3' GUUGUCGUCGUCGUCUACGU 5'
query=novel_mir_122, target=R03G_05454, score=3.5, range=519-538,
strand=-1
target 5' GAGCAGCAGCAGCAGAUUCA 3'
..... : :
query 3' GUUGUCGUCGUCGUCUACGU 5'
query=novel_mir_122, target=R03G_08883, score=3.5, range=525-544,
strand=-1
target 5' UAACAGGAGGAGCAGAUGCA 3'
..... : : : : : : : :
query 3' GUUGUCGUCGUCGUCUACGU 5'
query=novel_mir_122, target=R03G_05422, score=3.5, range=2-20,
strand=-1
target 5' UGA-AGUAGCAGCAGGUGCA 3'
... : : : : : : : :
query 3' GUUGUCGUCGUCGUCUACGU 5'
query=novel_mir_122, target=R03G_16410, score=3.5, range=513-532,
strand=-1
target 5' CGAAACCAGCAGCAGAUGCC 3'
... : : : : : : : :
query 3' GUUGUCGUCGUCGUCUACGU 5'
query=novel_mir_122, target=R03G_13835, score=3.5, range=8676-869
strand=-1
target 5' CAAUGGUAGCAGCAGAUUCA 3'
```

```
.....: :
query 3' GUUGUCGUCGUCGUCUACGU 5'
query=novel_mir_122, target=R03G_03416, score=4, range=881-900,
strand=1
target 5' GAACAGCAGCACUAGAUGCA 3'
.....: :
query 3' GUUGUCGUCGUCGUCUACGU 5'
query=novel_mir_122, target=R03G_06631, score=4, range=2974-2993,
strand=1
target 5' CAACAGCAGCAGCAGCAGCA 3'
.....: :
query 3' GUUGUCGUCGUCGUCUACGU 5'
query=novel_mir_122, target=R03G_01899, score=4, range=70-89, str
target 5' CAACAGCAGCAGCAGCAGCA 3'
.....: :
query 3' GUUGUCGUCGUCGUCUACGU 5'
query=novel_mir_122, target=R03G_05230, score=4, range=3520-3539,
strand=1
target 5' CAACAGCAGCAGCAGCAGCA 3'
.....: :
query 3' GUUGUCGUCGUCGUCUACGU 5'
query=novel_mir_122, target=R03G_16404, score=4, range=658-677,
strand=1
target 5' CAACAGCAGCAGCAGCAGCA 3'
.....: :
query 3' GUUGUCGUCGUCGUCUACGU 5'
query=novel_mir_122, target=R03G_10396, score=4, range=412-431,
strand=1
target 5' CAACAGCAGCAGCAGCAGCA 3'
.....: :
query 3' GUUGUCGUCGUCGUCUACGU 5'
query=novel_mir_122, target=R03G_07466, score=4, range=1741-1760,
strand=1
target 5' CAACAGCAGCAGCAGCAGCA 3'
.....: :
query 3' GUUGUCGUCGUCGUCUACGU 5'
query=novel_mir_122, target=R03G_09029, score=4, range=2332-2351,
strand=1
target 5' CAACAGCAGCAGCAGCAGCA 3'
.....: :
query 3' GUUGUCGUCGUCGUCUACGU 5'
query=novel_mir_122, target=R03G_10815, score=4, range=2581-2600,
strand=1
target 5' CAACAGCAGCAGCAGCAGCA 3'
.....: :
```

query 3' GUUGUCGUCGUCGUCUACGU 5'  
query=novel\_mir\_122, target=R03G\_05396, score=4, range=1351-1370,  
strand=1  
target 5' CAACAGCAGCAGCAGCAGCA 3'  
:::::::::::::::::: :::  
query 3' GUUGUCGUCGUCGUCUACGU 5'  
query=novel\_mir\_122, target=R03G\_04562, score=4, range=2209-2228,  
strand=1  
target 5' CAACAGCAGCAGCAGCAGCA 3'  
:::::::::::::::::: :::  
query 3' GUUGUCGUCGUCGUCUACGU 5'  
query=novel\_mir\_122, target=R03G\_11868, score=4, range=1645-1664,  
strand=1  
target 5' CAACAGCAGCAGCAGCAGCA 3'  
:::::::::::::::::: :::  
query 3' GUUGUCGUCGUCGUCUACGU 5'  
query=novel\_mir\_122, target=R03G\_12904, score=4, range=820-839,  
strand=1  
target 5' CAACAGCAGCAGCAGCAGCA 3'  
:::::::::::::::::: :::  
query 3' GUUGUCGUCGUCGUCUACGU 5'  
query=novel\_mir\_122, target=R03G\_11158, score=4, range=55-74, str  
target 5' CAACAGCAGCAGCAGCAGCA 3'  
:::::::::::::::::: :::  
query 3' GUUGUCGUCGUCGUCUACGU 5'  
query=novel\_mir\_122, target=R03G\_09085, score=4, range=802-821,  
strand=1  
target 5' CAACAGCAGCAGCAGCAGCA 3'  
:::::::::::::::::: :::  
query 3' GUUGUCGUCGUCGUCUACGU 5'  
query=novel\_mir\_122, target=R03G\_04522, score=4, range=1546-1565,  
strand=1  
target 5' CAACAGCAGCAGCAGACACA 3'  
:::::::::::::::::: ::  
query 3' GUUGUCGUCGUCGUCUACGU 5'  
query=novel\_mir\_122, target=R03G\_10851, score=4, range=337-356,  
strand=1  
target 5' CAACAGCAGCAGCAGCAGCA 3'  
:::::::::::::::::: :::  
query 3' GUUGUCGUCGUCGUCUACGU 5'  
query=novel\_mir\_122, target=R03G\_01361, score=4, range=460-479,  
strand=1  
target 5' CAACAGCAGCAGCAGCAGCA 3'  
:::::::::::::::::: :::  
query 3' GUUGUCGUCGUCGUCUACGU 5'

query=novel\_mir\_122, target=R03G\_02027, score=4, range=634-653,  
strand=1  
target 5' CAACAGCAGCAGCAGCAGCA 3'  
:::::::::::::::::: :::  
query 3' GUUGUCGUCGUCGUCUACGU 5'  
query=novel\_mir\_122, target=R03G\_10831, score=4, range=1090-1109,  
strand=1  
target 5' CAACAGCAGCAGCAGCAGCA 3'  
:::::::::::::::::: :::  
query 3' GUUGUCGUCGUCGUCUACGU 5'  
query=novel\_mir\_122, target=R03G\_07933, score=4, range=418-437,  
strand=1  
target 5' CAACAGCAGCAGCAGCAGCA 3'  
:::::::::::::::::: :::  
query 3' GUUGUCGUCGUCGUCUACGU 5'  
query=novel\_mir\_122, target=R03G\_15357, score=4, range=1055-1074,  
strand=1  
target 5' CAACAGCAGCAGCAGCAGCA 3'  
:::::::::::::::::: :::  
query 3' GUUGUCGUCGUCGUCUACGU 5'  
query=novel\_mir\_122, target=R03G\_06238, score=4, range=730-749,  
strand=1  
target 5' CAACAGCAGCAGCAGCAGCA 3'  
:::::::::::::::::: :::  
query 3' GUUGUCGUCGUCGUCUACGU 5'  
query=novel\_mir\_122, target=R03G\_00357, score=4, range=379-398,  
strand=1  
target 5' CAACAGCAGCAGCAGCAGCA 3'  
:::::::::::::::::: :::  
query 3' GUUGUCGUCGUCGUCUACGU 5'  
query=novel\_mir\_122, target=R03G\_05582, score=4, range=775-794,  
strand=1  
target 5' CAACAGCAGCAGCAGCAGCA 3'  
:::::::::::::::::: :::  
query 3' GUUGUCGUCGUCGUCUACGU 5'  
query=novel\_mir\_122, target=R03G\_02252, score=4, range=331-350,  
strand=1  
target 5' CAACAGCAGCAGCAGCAGCA 3'  
:::::::::::::::::: :::  
query 3' GUUGUCGUCGUCGUCUACGU 5'  
query=novel\_mir\_122, target=R03G\_02518, score=4, range=520-539,  
strand=1  
target 5' CAACAGCAGCAGCAGCAGCA 3'  
:::::::::::::::::: :::  
query 3' GUUGUCGUCGUCGUCUACGU 5'

query=novel\_mir\_122, target=R03G\_09721, score=4, range=601-620,  
strand=1  
target 5' CAACAGCAGCAGCAGCAGCA 3'  
:::::::::::::::::: :::  
query 3' GUUGUCGUCGUCGUCUACGU 5'  
query=novel\_mir\_122, target=R03G\_06665, score=4, range=727-746,  
strand=1  
target 5' CAACAGCAGCAGCAGCAGCA 3'  
:::::::::::::::::: :::  
query 3' GUUGUCGUCGUCGUCUACGU 5'  
query=novel\_mir\_122, target=R03G\_13648, score=4, range=718-737,  
strand=1  
target 5' CAACAGCAGCAGCAGAGUCA 3'  
:::::::::::::::::: ::  
query 3' GUUGUCGUCGUCGUCUACGU 5'  
query=novel\_mir\_122, target=R03G\_04604, score=4, range=132-151,  
strand=1  
target 5' CAACAGCAGCAGCAGCAGCA 3'  
:::::::::::::::::: :::  
query 3' GUUGUCGUCGUCGUCUACGU 5'  
query=novel\_mir\_122, target=R03G\_16262, score=4, range=159-178,  
strand=1  
target 5' CAACAGCAGCAGCAGCAGCA 3'  
:::::::::::::::::: :::  
query 3' GUUGUCGUCGUCGUCUACGU 5'  
query=novel\_mir\_122, target=R03G\_00028, score=4, range=373-392,  
strand=1  
target 5' CAACAGCAGCAGCAGCAGCA 3'  
:::::::::::::::::: :::  
query 3' GUUGUCGUCGUCGUCUACGU 5'  
query=novel\_mir\_122, target=R03G\_03857, score=4, range=421-440,  
strand=1  
target 5' CAACAGCAGCAGCAGCAGCA 3'  
:::::::::::::::::: :::  
query 3' GUUGUCGUCGUCGUCUACGU 5'  
query=novel\_mir\_122, target=R03G\_01791, score=4, range=170-189,  
strand=1  
target 5' CAACAGCAGCAGCAGCAGCA 3'  
:::::::::::::::::: :::  
query 3' GUUGUCGUCGUCGUCUACGU 5'  
query=novel\_mir\_122, target=R03G\_00501, score=4, range=103-122,  
strand=1  
target 5' CAACAGCAGCAGCAGCAGCA 3'  
:::::::::::::::::: :::  
query 3' GUUGUCGUCGUCGUCUACGU 5'





strand=1  
target 5' CAACA-CAGCAGCAGAUGGU 3'  
::::: ::::::::::::::  
query 3' GUUGUCGUCGUCGUCUACGU 5'  
query=novel\_mir\_122, target=R03G\_10401, score=4, range=1795-1814,  
strand=1  
target 5' CUACAACAGCAGCAAUGCA 3'  
: ::: ::::::::::: :::::  
query 3' GUUGUCGUCGUCGUCUACGU 5'  
query=novel\_mir\_122, target=R03G\_09692, score=4, range=539-558,  
strand=1  
target 5' CAACCCCAGCUGCAGAUGCA 3'  
::::: ::::: ::::::::::::::  
query 3' GUUGUCGUCGUCGUCUACGU 5'  
query=novel\_mir\_122, target=R03G\_01472, score=4, range=1204-1222,  
strand=1  
target 5' CAACAGCAGCAGCA-AAGCA 3'  
::::::::::::::::::: : :::  
query 3' GUUGUCGUCGUCGUCUACGU 5'  
query=novel\_mir\_122, target=R03G\_03490, score=4, range=427-446,  
strand=1  
target 5' CAAGAACAACAGCAGAUGCA 3'  
::: : :: ::::::::::::::  
query 3' GUUGUCGUCGUCGUCUACGU 5'  
query=novel\_mir\_122, target=R03G\_00640, score=4, range=1342-1361,  
strand=1  
target 5' CAACAGCAGCAGCAGCAGCA 3'  
::::::::::::::::::: :::  
query 3' GUUGUCGUCGUCGUCUACGU 5'  
query=novel\_mir\_122, target=R03G\_07933, score=4, range=346-365,  
strand=1  
target 5' CAACAGCAGCAGCAGCAGCA 3'  
::::::::::::::::::: :::  
query 3' GUUGUCGUCGUCGUCUACGU 5'  
query=novel\_mir\_122, target=R03G\_00640, score=4, range=1318-1337,  
strand=1  
target 5' CAACAGCAGCAGCAGCAGCA 3'  
::::::::::::::::::: :::  
query 3' GUUGUCGUCGUCGUCUACGU 5'  
query=novel\_mir\_122, target=R03G\_16171, score=4, range=6570-6589,  
strand=-1  
target 5' CAGCAGCAGCAGCAGGAGCG 3'  
::::::::::::::::::. ::.  
query 3' GUUGUCGUCGUCGUCUACGU 5'  
query=novel\_mir\_122, target=R03G\_12622, score=4, range=864-883,

```

strand=-1
target 5' CAAUGGCAACAGCAGGUGCA 3'
::::: : : : : : : : : :
query 3' GUUGUCGUCGUCGUCUACGU 5'
query=novel_mir_122, target=R03G_16997, score=4, range=825-844,
strand=-1
target 5' CAGCGGCAGCAGCAGGAGCA 3'
.: : : : : : : : : . : :
query 3' GUUGUCGUCGUCGUCUACGU 5'
query=novel_mir_122, target=R03G_09023, score=4, range=825-844,
strand=-1
target 5' CAGCGGCAGCAGCAGGAGCA 3'
.: : : : : : : : : . : :
query 3' GUUGUCGUCGUCGUCUACGU 5'
query=novel_mir_122, target=R03G_06866, score=4, range=897-916,
strand=-1
target 5' CGGCAACAGCAGUAGGUGCA 3'
.: : : : : : : : : . : :
query 3' GUUGUCGUCGUCGUCUACGU 5'
query=novel_mir_122, target=R03G_15548, score=4, range=258-277,
strand=-1
target 5' AAACAGCAGCAGCAGGAGCA 3'
.: : : : : : : : : . : :
query 3' GUUGUCGUCGUCGUCUACGU 5'
query=novel_mir_122, target=R03G_00781, score=4, range=1982-2002,
strand=-1
target 5' AAACAGCAGCAGCAGUAUGUA 3'
.: : : : : : : : : . : :
query 3' GUUGUCGUCGUCGUC-UACGU 5'
query=novel_mir_122, target=R03G_03842, score=4, range=504-523,
strand=-1
target 5' CAAUAGUAGCAGCAUAUGCU 3'
.: : : : : : : : : . : :
query 3' GUUGUCGUCGUCGUCUACGU 5'
query=novel_mir_122, target=R03G_01922, score=4, range=1209-1228,
strand=-1
target 5' GGAUACCAGUAGCAGAUGCA 3'
.: : . : : : : : : : : . : :
query 3' GUUGUCGUCGUCGUCUACGU 5'
query=novel_mir_122, target=R03G_03075, score=4, range=900-919,
strand=-1
target 5' CAACAGCAGCAGCAGCAGCA 3'
.: : : : : : : : : . : :
query 3' GUUGUCGUCGUCGUCUACGU 5'
query=novel_mir_122, target=R03G_10960, score=4, range=327-346,

```

strand=-1  
target 5' CAACAGCAGCAGCAGCAGCA 3'  
:::::::::::::::::: :::  
query 3' GUUGUCGUCGUCGUCUACGU 5'  
query=novel\_mir\_122, target=R03G\_07468, score=4, range=90-109,  
strand=-1  
target 5' CAACAGCAGCAGCAGCAGCA 3'  
:::::::::::::::::: :::  
query 3' GUUGUCGUCGUCGUCUACGU 5'  
query=novel\_mir\_122, target=R03G\_13479, score=4, range=468-487,  
strand=-1  
target 5' CAACAGCAGCAGCAGCGGCA 3'  
:::::::::::::::::: :::  
query 3' GUUGUCGUCGUCGUCUACGU 5'  
query=novel\_mir\_122, target=R03G\_08761, score=4, range=2958-2977,  
strand=-1  
target 5' CAACAGAAGCAGAAGGUGCA 3'  
:::::: ::::: :::: :::  
query 3' GUUGUCGUCGUCGUCUACGU 5'  
query=novel\_mir\_122, target=R03G\_09852, score=4, range=1452-1470,  
strand=-1  
target 5' UGA-AGCAGCAGCAGGUGUA 3'  
... :::::::::::::::::::::  
query 3' GUUGUCGUCGUCGUCUACGU 5'  
query=novel\_mir\_122, target=R03G\_11199, score=4, range=405-424,  
strand=-1  
target 5' CAACAACAGUAGCAGAUGGA 3'  
::::: ::::: ::::: :  
query 3' GUUGUCGUCGUCGUCUACGU 5'  
query=novel\_mir\_122, target=R03G\_11445, score=4, range=585-604,  
strand=-1  
target 5' UUACGGCAGCAGCAAUGCA 3'  
. :::::::::::::::::::: :  
query 3' GUUGUCGUCGUCGUCUACGU 5'  
query=novel\_mir\_122, target=R03G\_14941, score=4, range=1137-1156,  
strand=-1  
target 5' CAACUACAGCAGCAGGUGUA 3'  
:::: :::::: ::::: :  
query 3' GUUGUCGUCGUCGUCUACGU 5'  
query=novel\_mir\_122, target=R03G\_02922, score=4, range=57-76,  
strand=-1  
target 5' UAGCAGAAGCAGCAGAAGCA 3'  
..... :::::: ::::  
query 3' GUUGUCGUCGUCGUCUACGU 5'  
query=novel\_mir\_122, target=R03G\_03629, score=4, range=122-142,

strand=-1  
target 5' CGUUAGCAGCAGCAGCAUGCA 3'  
.. ..:.....: ..:..:  
query 3' GUUGUCGUCGUCGUC-UACGU 5'  
query=novel\_mir\_122, target=R03G\_14944, score=4, range=19-37,  
strand=-1  
target 5' GAACAGCAGCAGCA-AUGUA 3'  
.....: ..:..:  
query 3' GUUGUCGUCGUCGUCUACGU 5'  
query=novel\_mir\_122, target=R03G\_11822, score=4, range=1527-1546,  
strand=-1  
target 5' CUACAGCAGCAGCAGCUGCU 3'  
: ..:.....: :..:  
query 3' GUUGUCGUCGUCGUCUACGU 5'  
query=novel\_mir\_122, target=R03G\_11689, score=4, range=175-193,  
strand=-1  
target 5' CAACAACAGUAGCA-AUGCA 3'  
.....: ..:.....: ..:.....:  
query 3' GUUGUCGUCGUCGUCUACGU 5'  
query=novel\_mir\_122, target=R03G\_03761, score=4, range=205-223,  
strand=-1  
target 5' AUACAGCAGCAGCAGA-GCA 3'  
.....: ..:.....: :..:  
query 3' GUUGUCGUCGUCGUCUACGU 5'  
query=novel\_mir\_122, target=R03G\_00684, score=4, range=1497-1515,  
strand=-1  
target 5' UGAC-GAAGCAGCAGGUGCA 3'  
...: : ..:.....:.....:  
query 3' GUUGUCGUCGUCGUCUACGU 5'  
query=novel\_mir\_122, target=R03G\_12784, score=4, range=657-676,  
strand=-1  
target 5' CACCUGCUGCAGCAGAUGCA 3'  
:: : :: ..:.....:.....:  
query 3' GUUGUCGUCGUCGUCUACGU 5'  
query=novel\_mir\_122, target=R03G\_13835, score=4, range=13620-1363  
strand=-1  
target 5' CAGCGACAGCAGCAGCUGCA 3'  
.....: ..:.....: ..:.....:  
query 3' GUUGUCGUCGUCGUCUACGU 5'  
query=novel\_mir\_27, target=R03G\_11932, score=0.5, range=390-411,  
strand=-1  
target 5' CAGUCUCAUCCGAAUUCGGCAA 3'  
.....: ..:.....:.....:  
query 3' GUUAGAGUAGGCUUAAGCCGUU 5'  
query=novel\_mir\_27, target=R03G\_10033, score=0.5, range=390-411,

strand=-1  
target 5' CAGUCUCAUCCGAAUUCGGCAA 3'  
:~::~:  
query 3' GUUAGAGUAGGCUUAAGCCGUU 5'  
query=novel\_mir\_27, target=R03G\_12707, score=1, range=1140-1161,  
strand=-1  
target 5' CAAUCUCAUCCGAAUUCGGCGA 3'  
:~::~:  
query 3' GUUAGAGUAGGCUUAAGCCGUU 5'  
query=novel\_mir\_27, target=R03G\_10176, score=1, range=354-375,  
strand=-1  
target 5' CAAUCUCAUUCGAAUUCGGCAA 3'  
:~::~:  
query 3' GUUAGAGUAGGCUUAAGCCGUU 5'  
query=novel\_mir\_27, target=R03G\_03090, score=1, range=282-303,  
strand=-1  
target 5' CAAUCUCAUCCGAAUUCGGCGA 3'  
:~::~:  
query 3' GUUAGAGUAGGCUUAAGCCGUU 5'  
query=novel\_mir\_27, target=R03G\_15211, score=1, range=276-297,  
strand=-1  
target 5' CAAUCUCAUCUGAAUUCGGCAA 3'  
:~::~:  
query 3' GUUAGAGUAGGCUUAAGCCGUU 5'  
query=novel\_mir\_27, target=R03G\_15205, score=1, range=42-63, stra  
target 5' CAAUCUCAUCUGAAUUCGGCAA 3'  
:~::~:  
query 3' GUUAGAGUAGGCUUAAGCCGUU 5'  
query=novel\_mir\_27, target=R03G\_13940, score=2, range=288-309,  
strand=-1  
target 5' CAAUCUCAUUCGAAUUCGGCGA 3'  
:~::~:  
query 3' GUUAGAGUAGGCUUAAGCCGUU 5'  
query=novel\_mir\_27, target=R03G\_10964, score=2, range=1524-1545,  
strand=-1  
target 5' CAAUCUCAUUCGAAUUCGGCGA 3'  
:~::~:  
query 3' GUUAGAGUAGGCUUAAGCCGUU 5'  
query=novel\_mir\_27, target=R03G\_10581, score=2, range=1044-1065,  
strand=-1  
target 5' CAAUCUCAUCCGAAUUUGGCGA 3'  
:~::~:  
query 3' GUUAGAGUAGGCUUAAGCCGUU 5'  
query=novel\_mir\_27, target=R03G\_13355, score=2, range=351-372,  
strand=-1

target 5' CAAUCUCAUUCGAAUUCGGCGA 3'  
:~::~  
query 3' GUUAGAGUAGGCUUAAGCCGUU 5'  
query=novel\_mir\_27, target=R03G\_15444, score=2, range=354-375,  
strand=-1  
target 5' CAAUCUCAUUCGAAUUCGGCGA 3'  
:~::~  
query 3' GUUAGAGUAGGCUUAAGCCGUU 5'  
query=novel\_mir\_27, target=R03G\_13387, score=2, range=279-300,  
strand=-1  
target 5' CAAUCUCAUUCGAAUUCGGCGA 3'  
:~::~  
query 3' GUUAGAGUAGGCUUAAGCCGUU 5'  
query=novel\_mir\_27, target=R03G\_06072, score=2, range=864-885,  
strand=-1  
target 5' CAAUCUCAUUCGAAUUCGGCGA 3'  
:~::~  
query 3' GUUAGAGUAGGCUUAAGCCGUU 5'  
query=novel\_mir\_27, target=R03G\_02420, score=2, range=759-780,  
strand=-1  
target 5' CAAUCUCAUUCGAAUUCGGCGA 3'  
:~::~  
query 3' GUUAGAGUAGGCUUAAGCCGUU 5'  
query=novel\_mir\_27, target=R03G\_15681, score=2, range=693-714,  
strand=-1  
target 5' CAAUCUCAUUCGAAUUCGGCGA 3'  
:~::~  
query 3' GUUAGAGUAGGCUUAAGCCGUU 5'  
query=novel\_mir\_27, target=R03G\_13488, score=2, range=690-711,  
strand=-1  
target 5' CAAUCUCAUUCGAAUUCGGCGA 3'  
:~::~  
query 3' GUUAGAGUAGGCUUAAGCCGUU 5'  
query=novel\_mir\_27, target=R03G\_05824, score=2, range=690-711,  
strand=-1  
target 5' CAAUCUCAUUCGAAUUCGGCGA 3'  
:~::~  
query 3' GUUAGAGUAGGCUUAAGCCGUU 5'  
query=novel\_mir\_27, target=R03G\_13491, score=2, range=690-711,  
strand=-1  
target 5' CAAUCUCAUUCGAAUUCGGCGA 3'  
:~::~  
query 3' GUUAGAGUAGGCUUAAGCCGUU 5'  
query=novel\_mir\_27, target=R03G\_03517, score=2, range=693-714,  
strand=-1

target 5' CAAUCUCAUUCGAAUUCGGCGA 3'  
:~::~  
query 3' GUUAGAGUAGGCUUAAGCCGUU 5'  
query=novel\_mir\_27, target=R03G\_03518, score=2, range=693-714,  
strand=-1  
target 5' CAAUCUCAUUCGAAUUCGGCGA 3'  
:~::~  
query 3' GUUAGAGUAGGCUUAAGCCGUU 5'  
query=novel\_mir\_27, target=R03G\_10939, score=2, range=474-495,  
strand=-1  
target 5' CAAUCUCAUUCGAAUUCGGCGA 3'  
:~::~  
query 3' GUUAGAGUAGGCUUAAGCCGUU 5'  
query=novel\_mir\_27, target=R03G\_01844, score=2, range=474-495,  
strand=-1  
target 5' CAAUCUCAUUCGAAUUCGGCGA 3'  
:~::~  
query 3' GUUAGAGUAGGCUUAAGCCGUU 5'  
query=novel\_mir\_27, target=R03G\_04917, score=2, range=432-453,  
strand=-1  
target 5' CAAUCUCAUUCGAAUUCGGCGA 3'  
:~::~  
query 3' GUUAGAGUAGGCUUAAGCCGUU 5'  
query=novel\_mir\_27, target=R03G\_15620, score=2, range=354-375,  
strand=-1  
target 5' CAAUCUCAUUCGAAUUCGGCGA 3'  
:~::~  
query 3' GUUAGAGUAGGCUUAAGCCGUU 5'  
query=novel\_mir\_27, target=R03G\_01010, score=2, range=354-375,  
strand=-1  
target 5' CAAUCUCAUUCGAAUUCGGUAA 3'  
:~::~  
query 3' GUUAGAGUAGGCUUAAGCCGUU 5'  
query=novel\_mir\_27, target=R03G\_00618, score=2, range=393-414,  
strand=-1  
target 5' CAAUCUCAUUCGAAUUCGGCGA 3'  
:~::~  
query 3' GUUAGAGUAGGCUUAAGCCGUU 5'  
query=novel\_mir\_27, target=R03G\_11198, score=2, range=351-372,  
strand=-1  
target 5' CAAUCUCAUUCGAAUUCGGCGA 3'  
:~::~  
query 3' GUUAGAGUAGGCUUAAGCCGUU 5'  
query=novel\_mir\_27, target=R03G\_13658, score=2, range=282-303,  
strand=-1



target 5' CAAUCUCAUUCGAAUUCGGCGA 3'  
:~::~  
query 3' GUUAGAGUAGGCUUAAGCCGUU 5'  
query=novel\_mir\_27, target=R03G\_02388, score=2, range=330-351,  
strand=-1  
target 5' CAAUCUCAUUCGAAUUCGGCGA 3'  
:~::~  
query 3' GUUAGAGUAGGCUUAAGCCGUU 5'  
query=novel\_mir\_27, target=R03G\_01166, score=2, range=261-282,  
strand=-1  
target 5' CAAUCUCAUUCGAAUUCGGCGA 3'  
:~::~  
query 3' GUUAGAGUAGGCUUAAGCCGUU 5'  
query=novel\_mir\_27, target=R03G\_12298, score=2, range=276-297,  
strand=-1  
target 5' CAAUCUCAUUCGAAUUCGGCGA 3'  
:~::~  
query 3' GUUAGAGUAGGCUUAAGCCGUU 5'  
query=novel\_mir\_27, target=R03G\_10210, score=2, range=42-63, stra  
target 5' CAAUCUCAUUCGAAUUCGGCGA 3'  
:~::~  
query 3' GUUAGAGUAGGCUUAAGCCGUU 5'  
query=novel\_mir\_27, target=R03G\_01028, score=2, range=42-63, stra  
target 5' CAAUCUCAUUCGAAUUCGGCGA 3'  
:~::~  
query 3' GUUAGAGUAGGCUUAAGCCGUU 5'  
query=novel\_mir\_27, target=R03G\_12001, score=2.5, range=1554-1575  
strand=-1  
target 5' CAAUCUCAUUCGAAUUCGGCGG 3'  
:~::~  
query 3' GUUAGAGUAGGCUUAAGCCGUU 5'  
query=novel\_mir\_27, target=R03G\_09592, score=2.5, range=354-375,  
strand=-1  
target 5' CAAUUUCAUUCGAAUUCGGCGA 3'  
:~::~  
query 3' GUUAGAGUAGGCUUAAGCCGUU 5'  
query=novel\_mir\_27, target=R03G\_11600, score=2.5, range=192-213,  
strand=-1  
target 5' CAGUCUCAUUCGAAUUCGGCGA 3'  
:~::~  
query 3' GUUAGAGUAGGCUUAAGCCGUU 5'  
query=novel\_mir\_27, target=R03G\_09333, score=3, range=42-63, stra  
target 5' CAAUCUCAUUUGAAUUCGGCGA 3'  
:~::~  
query 3' GUUAGAGUAGGCUUAAGCCGUU 5'

query=novel\_mir\_27, target=R03G\_15386, score=3, range=351-372,  
strand=-1  
target 5' CAAUCUCAUUUGAAUUCGGCGA 3'  
.....:~  
query 3' GUUAGAGUAGGCUUAAGCCGUU 5'  
query=novel\_mir\_27, target=R03G\_04564, score=3, range=282-303,  
strand=-1  
target 5' CAAUCUCAUUUGAAUUCGGCGA 3'  
.....:~  
query 3' GUUAGAGUAGGCUUAAGCCGUU 5'  
query=novel\_mir\_27, target=R03G\_09325, score=3, range=204-225,  
strand=-1  
target 5' CAAUCUCAUUUGAAUUCGGCGA 3'  
.....:~  
query 3' GUUAGAGUAGGCUUAAGCCGUU 5'  
query=novel\_mir\_27, target=R03G\_02174, score=3, range=42-63, stra  
target 5' UAAUUUCAUUCGAAUUCGGCGA 3'  
.....:~  
query 3' GUUAGAGUAGGCUUAAGCCGUU 5'  
query=novel\_mir\_27, target=R03G\_09103, score=3, range=354-375,  
strand=-1  
target 5' CAAUGUCAUUCGAAUUCGGCGA 3'  
:::: .....:~  
query 3' GUUAGAGUAGGCUUAAGCCGUU 5'  
query=novel\_mir\_27, target=R03G\_11120, score=3, range=1017-1038,  
strand=-1  
target 5' CAUUCUCAUUCGAAUUCGGCGA 3'  
:: .....:~  
query 3' GUUAGAGUAGGCUUAAGCCGUU 5'  
query=novel\_mir\_27, target=R03G\_02281, score=3, range=567-588,  
strand=-1  
target 5' CAAUCCCAUUCGAAUUCGGCGA 3'  
:::: .....:~  
query 3' GUUAGAGUAGGCUUAAGCCGUU 5'  
query=novel\_mir\_27, target=R03G\_09094, score=3, range=42-63, stra  
target 5' CAAUGUCAUUCGAAUUCGGCGA 3'  
:::: .....:~  
query 3' GUUAGAGUAGGCUUAAGCCGUU 5'  
query=novel\_mir\_27, target=R03G\_02747, score=3, range=336-357,  
strand=-1  
target 5' CAAACUCAUUCGAAUUCGGCGA 3'  
::: .....:~  
query 3' GUUAGAGUAGGCUUAAGCCGUU 5'  
query=novel\_mir\_27, target=R03G\_13416, score=3, range=354-375,  
strand=-1

```

target 5' CAAUCGCAUUCGAAUUCGGCGA 3'
::::: :::::::::::::::::::::
query 3' GUUAGAGUAGGCUUAAGCCGUU 5'
query=novel_mir_27, target=R03G_05862, score=3, range=42-63, stra
target 5' CAAUCUCAUUCGAAUUCGGCCA 3'
::::::::::: :
query 3' GUUAGAGUAGGCUUAAGCCGUU 5'
query=novel_mir_27, target=R03G_10887, score=3, range=42-63, stra
target 5' CAAUCUCAUCCGAAUUCGUCGA 3'
::::::::::: :::
query 3' GUUAGAGUAGGCUUAAGCCGUU 5'
query=novel_mir_27, target=R03G_10263, score=3, range=159-180,
strand=-1
target 5' CAAUCCCAUUCGAAUUCGGCGA 3'
::::: :::::::::::::::::::::
query 3' GUUAGAGUAGGCUUAAGCCGUU 5'
query=novel_mir_27, target=R03G_09114, score=3, range=42-63, stra
target 5' CAAUGUCAUUCGAAUUCGGCGA 3'
::::: :::::::::::::::::::::
query 3' GUUAGAGUAGGCUUAAGCCGUU 5'
query=novel_mir_27, target=R03G_14876, score=3.5, range=282-303,
strand=-1
target 5' CAAUCUCACUCGAAUUCGGCGG 3'
::::::::::: ..::::::::::::...
query 3' GUUAGAGUAGGCUUAAGCCGUU 5'
query=novel_mir_27, target=R03G_14864, score=3.5, range=282-303,
strand=-1
target 5' CAAUCUCACUCGAAUUCGGCGG 3'
::::::::::: ..::::::::::::...
query 3' GUUAGAGUAGGCUUAAGCCGUU 5'
query=novel_mir_27, target=R03G_11996, score=3.5, range=249-270,
strand=-1
target 5' CAAUAUCAUUCGAAUUCGGCGG 3'
::::: :::::::::::::::::::::
query 3' GUUAGAGUAGGCUUAAGCCGUU 5'
query=novel_mir_27, target=R03G_02998, score=4, range=42-63, stra
target 5' CAAUCGCAUUCGAAUUCGGCGA 3'
::::: :::::::::::::::::::::
query 3' GUUAGAGUAGGCUUAAGCCGUU 5'
query=novel_mir_27, target=R03G_10100, score=4, range=159-180,
strand=-1
target 5' CAAUCCCAUUCGAAUUCGGCGA 3'
::::: :::::::::::::::::::::
query 3' GUUAGAGUAGGCUUAAGCCGUU 5'
query=novel_mir_5, target=R03G_09168, score=1, range=99-121, stra

```

```

target 5' AGCGAUACUUCUGAACAGUGGUA 3'
: : : : : : : : : : : : : : : : : : :
query 3' UCGCUACGAAGACUUGUCACCAU 5'
query=novel_mir_5, target=R03G_04787, score=1, range=99-121, str
target 5' AGCGAUACUUCUGAACAGUGGUA 3'
: : : : : : : : : : : : : : : : : : :
query 3' UCGCUACGAAGACUUGUCACCAU 5'
query=novel_mir_5, target=R03G_04690, score=1.5, range=99-121,
strand=-1
target 5' AGCGGUACUUCUGAACAGUGGUA 3'
: : : : : : : : : : : : : : : : : : :
query 3' UCGCUACGAAGACUUGUCACCAU 5'
query=novel_mir_5, target=R03G_02822, score=1.5, range=99-121,
strand=-1
target 5' AGCGGUACUUCUGAACAGUGGUA 3'
: : : : : : : : : : : : : : : : : : :
query 3' UCGCUACGAAGACUUGUCACCAU 5'
query=novel_mir_5, target=R03G_15141, score=1.5, range=99-121,
strand=-1
target 5' AGCGGUACUUCUGAACAGUGGUA 3'
: : : : : : : : : : : : : : : : : : :
query 3' UCGCUACGAAGACUUGUCACCAU 5'
query=novel_mir_5, target=R03G_00304, score=1.5, range=99-121,
strand=-1
target 5' AGCGGUACUUCUGAACAGUGGUA 3'
: : : : ~ : : : : ~ : : : : ~ : : : :
query 3' UCGCUACGAAGACUUGUCACCAU 5'
query=novel_mir_5, target=R03G_12954, score=2.5, range=99-121,
strand=-1
target 5' AGCGGUACUUCUGGACAGUGGUA 3'
: : : : ~ : : : : ~ : : : : ~ : : : :
query 3' UCGCUACGAAGACUUGUCACCAU 5'
query=novel_mir_5, target=R03G_10770, score=2.5, range=99-121,
strand=-1
target 5' AGCGGUACUUCUGGACAGUGGUA 3'
: : : : ~ : : : : ~ : : : : ~ : : : :
query 3' UCGCUACGAAGACUUGUCACCAU 5'
query=novel_mir_5, target=R03G_10762, score=2.5, range=99-121,
strand=-1
target 5' AGCGGUACUUCUGGACAGUGGUA 3'
: : : : ~ : : : : ~ : : : : ~ : : : :
query 3' UCGCUACGAAGACUUGUCACCAU 5'
query=novel_mir_5, target=R03G_05431, score=2.5, range=99-121,
strand=-1
target 5' AGCAGUACUUCUGAACAGUGGUA 3'

```

```

::: .: ::::::::::::::::::::
query 3' UCGCUACGAAGACUUGUCACCAU 5'
query=novel_mir_114, target=R03G_10264, score=1, range=642-663,
strand=-1
target 5' GAGCAAUCCAACUGUUAGACGA 3'
::::::::::::::::::
query 3' CUCGUUAGGUUGACAGUCUGCU 5'
query=novel_mir_114, target=R03G_12001, score=1, range=624-645,
strand=-1
target 5' GAGCAACCCAACUGUCAGACGA 3'
:::::: ::::::::::::::::::::
query 3' CUCGUUAGGUUGACAGUCUGCU 5'
query=novel_mir_114, target=R03G_10556, score=1, range=624-645,
strand=-1
target 5' GAGCAACCCAACUGUCAGACGA 3'
:::::: ::::::::::::::::::::
query 3' CUCGUUAGGUUGACAGUCUGCU 5'
query=novel_mir_114, target=R03G_17369, score=1, range=624-645,
strand=-1
target 5' GAGCAACCCAACUGUCAGACGA 3'
:::::: ::::::::::::::::::::
query 3' CUCGUUAGGUUGACAGUCUGCU 5'
query=novel_mir_114, target=R03G_01302, score=1, range=195-216,
strand=-1
target 5' GAGCAACCCAACUGUCAGACGA 3'
:::::: ::::::::::::::::::::
query 3' CUCGUUAGGUUGACAGUCUGCU 5'
query=novel_mir_114, target=R03G_00617, score=1.5, range=468-489,
strand=-1
target 5' GAGUAACCCAACUGUCAGACGA 3'
::::: ::::::::::::::::::::
query 3' CUCGUUAGGUUGACAGUCUGCU 5'
query=novel_mir_104, target=R03G_12131, score=3.5, range=490-509,
strand=1
target 5' UUACCCUCUUUCCCCUCUCUG 3'
:: ::::::::::::::::::::
query 3' AAGGGGGGAAAGGGGGGGAC 5'
query=novel_mir_104, target=R03G_01691, score=4, range=471-490,
strand=1
target 5' CUCCUCUCUUUCCCCUCUC 3'
::::::::::::::::::
query 3' AAGGGGGGAAAGGGGGGGAC 5'
query=novel_mir_208, target=R03G_15989, score=1, range=1483-1504,
strand=1
target 5' UUGGCGGAUGACCACAUGGAGA 3'

```

query 3' UACCGCCUACUGGUGUACCUCU 5'  
query=novel\_mir\_141, target=R03G\_11952, score=0, range=1412-1433,  
strand=1  
target 5' GCCAACACCUUGCCUCGGUCUA 3'

query 3' CGGUUGUGGAACGGAGCCAGAU 5'  
query=novel\_mir\_141, target=R03G\_12964, score=0, range=1034-1055,  
strand=1  
target 5' GCCAACACCUUGCCUCGGUCUA 3'

query 3' CGGUUGUGGAACGGAGCCAGAU 5'  
query=novel\_mir\_141, target=R03G\_12075, score=0, range=1034-1055,  
strand=1  
target 5' GCCAACACCUUGCCUCGGUCUA 3'

query 3' CGGUUGUGGAACGGAGCCAGAU 5'  
query=novel\_mir\_141, target=R03G\_09927, score=0, range=1034-1055,  
strand=1  
target 5' GCCAACACCUUGCCUCGGUCUA 3'

query 3' CGGUUGUGGAACGGAGCCAGAU 5'  
query=novel\_mir\_141, target=R03G\_05925, score=0, range=1034-1055,  
strand=1  
target 5' GCCAACACCUUGCCUCGGUCUA 3'

query 3' CGGUUGUGGAACGGAGCCAGAU 5'  
query=novel\_mir\_141, target=R03G\_05927, score=0, range=1034-1055,  
strand=1  
target 5' GCCAACACCUUGCCUCGGUCUA 3'

query 3' CGGUUGUGGAACGGAGCCAGAU 5'  
query=novel\_mir\_141, target=R03G\_16708, score=0, range=1034-1055,  
strand=1  
target 5' GCCAACACCUUGCCUCGGUCUA 3'

query 3' CGGUUGUGGAACGGAGCCAGAU 5'  
query=novel\_mir\_141, target=R03G\_09951, score=0, range=1292-1313,  
strand=1  
target 5' GCCAACACCUUGCCUCGGUCUA 3'

query 3' CGGUUGUGGAACGGAGCCAGAU 5'  
query=novel\_mir\_141, target=R03G\_12669, score=0, range=1034-1055,  
strand=1  
target 5' GCCAACACCUUGCCUCGGUCUA 3'

```
::::::::::
query 3' CGGUUGUGGAACGGAGCCAGAU 5'
query=novel_mir_141, target=R03G_12961, score=0, range=1367-1388,
strand=1
target 5' GCCAACACCUUGCCUCGGUCUA 3'
::::::::::
query 3' CGGUUGUGGAACGGAGCCAGAU 5'
query=novel_mir_141, target=R03G_00684, score=0, range=413-434,
strand=1
target 5' GCCAACACCUUGCCUCGGUCUA 3'
::::::::::
query 3' CGGUUGUGGAACGGAGCCAGAU 5'
query=novel_mir_141, target=R03G_05524, score=0, range=1034-1055,
strand=1
target 5' GCCAACACCUUGCCUCGGUCUA 3'
::::::::::
query 3' CGGUUGUGGAACGGAGCCAGAU 5'
query=novel_mir_141, target=R03G_08411, score=3.5, range=202-223,
strand=1
target 5' ACCGACGGCUUGCCUCGGUCUG 3'
::::. ::::::::::
query 3' CGGUUGUGGAACGGAGCCAGAU 5'
query=novel_mir_160, target=R03G_01965, score=0, range=76-94, str
target 5' GAUAGAAUGGAUCUUGAAA 3'
::::::::::
query 3' CUAUCUUACCUAGAACUUU 5'
query=novel_mir_160, target=R03G_12973, score=0, range=76-94, str
target 5' GAUAGAAUGGAUCUUGAAA 3'
::::::::::
query 3' CUAUCUUACCUAGAACUUU 5'
query=novel_mir_160, target=R03G_12650, score=0, range=76-94, str
target 5' GAUAGAAUGGAUCUUGAAA 3'
::::::::::
query 3' CUAUCUUACCUAGAACUUU 5'
query=novel_mir_160, target=R03G_04801, score=0, range=76-94, str
target 5' GAUAGAAUGGAUCUUGAAA 3'
::::::::::
query 3' CUAUCUUACCUAGAACUUU 5'
query=novel_mir_160, target=R03G_02851, score=0, range=76-94, str
target 5' GAUAGAAUGGAUCUUGAAA 3'
::::::::::
query 3' CUAUCUUACCUAGAACUUU 5'
query=novel_mir_160, target=R03G_08650, score=0, range=76-94, str
target 5' GAUAGAAUGGAUCUUGAAA 3'
::::::::::
```

query 3' CUAUCUUACCUAGAACUUU 5'  
query=novel\_mir\_160, target=R03G\_08655, score=0, range=76-94, str  
target 5' GAUAGAAUGGAUCUUGAAA 3'  
.....  
query 3' CUAUCUUACCUAGAACUUU 5'  
query=novel\_mir\_160, target=R03G\_17425, score=0, range=76-94, str  
target 5' GAUAGAAUGGAUCUUGAAA 3'  
.....  
query 3' CUAUCUUACCUAGAACUUU 5'  
query=novel\_mir\_160, target=R03G\_12958, score=0, range=76-94, str  
target 5' GAUAGAAUGGAUCUUGAAA 3'  
.....  
query 3' CUAUCUUACCUAGAACUUU 5'  
query=novel\_mir\_160, target=R03G\_02849, score=0, range=76-94, str  
target 5' GAUAGAAUGGAUCUUGAAA 3'  
.....  
query 3' CUAUCUUACCUAGAACUUU 5'  
query=novel\_mir\_160, target=R03G\_05217, score=0, range=76-94, str  
target 5' GAUAGAAUGGAUCUUGAAA 3'  
.....  
query 3' CUAUCUUACCUAGAACUUU 5'  
query=novel\_mir\_160, target=R03G\_15259, score=0, range=76-94, str  
target 5' GAUAGAAUGGAUCUUGAAA 3'  
.....  
query 3' CUAUCUUACCUAGAACUUU 5'  
query=novel\_mir\_160, target=R03G\_07035, score=0, range=76-94, str  
target 5' GAUAGAAUGGAUCUUGAAA 3'  
.....  
query 3' CUAUCUUACCUAGAACUUU 5'  
query=novel\_mir\_160, target=R03G\_07982, score=0, range=76-94, str  
target 5' GAUAGAAUGGAUCUUGAAA 3'  
.....  
query 3' CUAUCUUACCUAGAACUUU 5'  
query=novel\_mir\_160, target=R03G\_11778, score=0, range=76-94, str  
target 5' GAUAGAAUGGAUCUUGAAA 3'  
.....  
query 3' CUAUCUUACCUAGAACUUU 5'  
query=novel\_mir\_160, target=R03G\_00697, score=0, range=76-94, str  
target 5' GAUAGAAUGGAUCUUGAAA 3'  
.....  
query 3' CUAUCUUACCUAGAACUUU 5'  
query=novel\_mir\_160, target=R03G\_16408, score=2, range=76-94, str  
target 5' GAUAGAAUGGAUCCUGAAA 3'  
..... : : : : :  
query 3' CUAUCUUACCUAGAACUUU 5'



query=novel\_mir\_160, target=R03G\_07636, score=2.5, range=1132-114  
strand=-1  
target 5' GAU-GGAUGGAUCUUGAAC 3'  
:: :::::::::::::::  
query 3' CUAUCUUACCUAGAACUUU 5'  
query=novel\_mir\_160, target=R03G\_03182, score=3, range=659-676,  
strand=1  
target 5' GA-AGAAUGGAUUAUGAAA 3'  
:: :::::::::::::::  
query 3' CUAUCUUACCUAGAACUUU 5'  
query=novel\_mir\_160, target=R03G\_05761, score=3, range=131-149,  
strand=-1  
target 5' GAUGGAAGGGAUCUUGAAG 3'  
::: :::::::::::::::  
query 3' CUAUCUUACCUAGAACUUU 5'  
query=novel\_mir\_160, target=R03G\_03922, score=3, range=646-664,  
strand=-1  
target 5' GAGAGGAUGGGUCUUGAAG 3'  
:: :::::::::::::::  
query 3' CUAUCUUACCUAGAACUUU 5'  
query=novel\_mir\_160, target=R03G\_09356, score=3, range=2569-2588,  
strand=-1  
target 5' GGUGGAGGUGGAUCUUGAAA 3'  
::: :::::::::::::::  
query 3' CUAUCU-UACCUAGAACUUU 5'  
query=novel\_mir\_160, target=R03G\_07923, score=3.5, range=43-61,  
strand=1  
target 5' AAUAUGAUGGAUUUUGAAA 3'  
::: :::::::::::::::  
query 3' CUAUCUUACCUAGAACUUU 5'  
query=novel\_mir\_160, target=R03G\_00784, score=3.5, range=391-409,  
strand=1  
target 5' GACAGGAUGGAUCUUGACA 3'  
:: :::::::::::::::  
query 3' CUAUCUUACCUAGAACUUU 5'  
query=novel\_mir\_160, target=R03G\_15359, score=3.5, range=4063-408  
strand=1  
target 5' GAUA-AAUUGAUCUUGAAG 3'  
::: ::: :::::::::::::::  
query 3' CUAUCUUACCUAGAACUUU 5'  
query=novel\_mir\_160, target=R03G\_15580, score=3.5, range=908-926,  
strand=-1  
target 5' UAUCGGAUGGAUCUUGGAA 3'  
:: :::::::::::::::  
query 3' CUAUCUUACCUAGAACUUU 5'

query=novel\_mir\_160, target=R03G\_13866, score=3.5, range=776-794,  
strand=-1  
target 5' UAUCGGAUGGAUCUUGGAA 3'  
:: :.....::  
query 3' CUAUCUUACCUAGAACUUU 5'

query=novel\_mir\_160, target=R03G\_11771, score=3.5, range=944-962,  
strand=-1  
target 5' UAUCGGAUGGAUCUUGGAA 3'  
:: :.....::  
query 3' CUAUCUUACCUAGAACUUU 5'

query=novel\_mir\_160, target=R03G\_12169, score=3.5, range=944-962,  
strand=-1  
target 5' UAUCGGAUGGAUCUUGGAA 3'  
:: :.....::  
query 3' CUAUCUUACCUAGAACUUU 5'

query=novel\_mir\_160, target=R03G\_01207, score=3.5, range=878-896,  
strand=-1  
target 5' UAUCGGAUGGAUCUUGGAA 3'  
:: :.....::  
query 3' CUAUCUUACCUAGAACUUU 5'

query=novel\_mir\_160, target=R03G\_14626, score=3.5, range=944-962,  
strand=-1  
target 5' UAUCGGAUGGAUCUUGGAA 3'  
:: :.....::  
query 3' CUAUCUUACCUAGAACUUU 5'

query=novel\_mir\_160, target=R03G\_07377, score=3.5, range=1247-126  
strand=-1  
target 5' AGUAAAAUGGAUUUUGAAA 3'  
.:: :.....::  
query 3' CUAUCUUACCUAGAACUUU 5'

query=novel\_mir\_160, target=R03G\_04785, score=3.5, range=908-926,  
strand=-1  
target 5' UAUCGGAUGGAUCUUGGAA 3'  
:: :.....::  
query 3' CUAUCUUACCUAGAACUUU 5'

query=novel\_mir\_160, target=R03G\_01740, score=3.5, range=908-926,  
strand=-1  
target 5' UAUCGGAUGGAUCUUGGAA 3'  
:: :.....::  
query 3' CUAUCUUACCUAGAACUUU 5'

query=novel\_mir\_160, target=R03G\_06430, score=3.5, range=908-926,  
strand=-1  
target 5' UAUCGGAUGGAUCUUGGAA 3'  
:: :.....::  
query 3' CUAUCUUACCUAGAACUUU 5'

query=novel\_mir\_160, target=R03G\_13148, score=3.5, range=677-695,  
strand=-1  
target 5' UAUCGGAUGGAUCUUGGAA 3'  
:: :.....:  
query 3' CUAUCUUACCUAGAACUUU 5'  
query=novel\_mir\_160, target=R03G\_05958, score=3.5, range=908-926,  
strand=-1  
target 5' UAUCGGAUGGAUCUUGGAA 3'  
:: :.....:  
query 3' CUAUCUUACCUAGAACUUU 5'  
query=novel\_mir\_160, target=R03G\_03555, score=3.5, range=944-962,  
strand=-1  
target 5' UAUCGGAUGGAUCUUGGAA 3'  
:: :.....:  
query 3' CUAUCUUACCUAGAACUUU 5'  
query=novel\_mir\_160, target=R03G\_01309, score=3.5, range=893-911,  
strand=-1  
target 5' UAUCGGAUGGAUCUUGGAA 3'  
:: :.....:  
query 3' CUAUCUUACCUAGAACUUU 5'  
query=novel\_mir\_160, target=R03G\_10522, score=3.5, range=908-926,  
strand=-1  
target 5' UAUCGGAUGGAUCUUGGAA 3'  
:: :.....:  
query 3' CUAUCUUACCUAGAACUUU 5'  
query=novel\_mir\_160, target=R03G\_02100, score=4, range=3136-3154,  
strand=1  
target 5' ACUAGAAUUGAUCUUGAAA 3'  
:.....:  
query 3' CUAUCUUACCUAGAACUUU 5'  
query=novel\_mir\_160, target=R03G\_13643, score=4, range=1220-1238,  
strand=1  
target 5' GGUGGUAUGGAUCUGGAAA 3'  
:..: :.....: :...:  
query 3' CUAUCUUACCUAGAACUUU 5'  
query=novel\_mir\_160, target=R03G\_12884, score=4, range=1162-1180,  
strand=1  
target 5' GAUGAAAUGGAUCUUGAUG 3'  
:..: :.....: :.  
query 3' CUAUCUUACCUAGAACUUU 5'  
query=novel\_mir\_160, target=R03G\_11626, score=4, range=505-523,  
strand=1  
target 5' AAAAAAUGGAUUUUGAAA 3'  
: : :.....:  
query 3' CUAUCUUACCUAGAACUUU 5'



query=novel\_mir\_171, target=R03G\_04023, score=0, range=910-929,  
strand=1  
target 5' CGCCUCUUUUUCCCAAUGA 3'  
: : : : : : : : : :  
query 3' GCGGAGAAAAAGGUUUACU 5'  
query=novel\_mir\_171, target=R03G\_10788, score=2, range=49-68, str  
target 5' CGCCUCUUUUUCCCAAUGA 3'  
: : : : : : : : : :  
query 3' GCGGAGAAAAAGGUUUACU 5'  
query=novel\_mir\_171, target=R03G\_01741, score=2, range=1402-1421,  
strand=1  
target 5' CGCCUCUUUUUCCCAAUGA 3'  
: : : : : : : : : :  
query 3' GCGGAGAAAAAGGUUUACU 5'  
query=novel\_mir\_171, target=R03G\_14401, score=3.5, range=935-954,  
strand=1  
target 5' GGUCUCUUUUUCCAAGUGC 3'  
: : : : : : : : : :  
query 3' GCGGAGAAAAAGGUUUACU 5'  
query=novel\_mir\_171, target=R03G\_10693, score=3.5, range=2642-266  
strand=1  
target 5' CGCUAUCUUCUUCCCAAUGA 3'  
: : : : : : : : : :  
query 3' GCGG-AGAAAAAGGUUUACU 5'  
query=novel\_mir\_171, target=R03G\_08087, score=3.5, range=52-71,  
strand=-1  
target 5' CCCUUCUUUUUACCAAUGA 3'  
: : : : : : : : : :  
query 3' GCGGAGAAAAAGGUUUACU 5'  
query=novel\_mir\_171, target=R03G\_16763, score=4, range=265-284,  
strand=1  
target 5' GGCAUCUUUUUCCCAAUCA 3'  
: : : : : : : : : :  
query 3' GCGGAGAAAAAGGUUUACU 5'  
query=novel\_mir\_171, target=R03G\_14502, score=4, range=2138-2158,  
strand=1  
target 5' UGCUGAUCUUUUCCCAAUGA 3'  
: : : : : : : : : :  
query 3' GCGGAGA-AAAAAGGUUUACU 5'  
query=novel\_mir\_171, target=R03G\_03068, score=4, range=197-216,  
strand=-1  
target 5' UCCUUUUUGUUCCCAAUGA 3'  
: : : : : : : : : :  
query 3' GCGGAGAAAAAGGUUUACU 5'  
query=novel\_mir\_171, target=R03G\_16875, score=4, range=658-678,

strand=-1  
target 5' UGCCUUCUUUUUACCAAUGG 3'  
. . . . : : : : : : : : : : .  
query 3' GCGG-AGAAAAAGGUUUACU 5'  
query=novel\_mir\_171, target=R03G\_04174, score=4, range=161-180,  
strand=-1  
target 5' UGUCAAUUUUUCCAAGUGA 3'  
. . . . : : : : : : : : : : .  
query 3' GCGGAGAAAAAGGUUUACU 5'  
query=novel\_mir\_171, target=R03G\_09393, score=4, range=528-547,  
strand=-1  
target 5' UACUUGUUUUUCCAAGUGU 3'  
. . . . : : : : : : : : : : .  
query 3' GCGGAGAAAAAGGUUUACU 5'  
query=novel\_mir\_171, target=R03G\_15824, score=4, range=838-856,  
strand=-1  
target 5' CGGCACUUUUUCC-AAUGA 3'  
: : : : : : : : : : : : : : .  
query 3' GCGGAGAAAAAGGUUUACU 5'  
query=novel\_mir\_199, target=R03G\_04428, score=1, range=1072-1093,  
strand=1  
target 5' CAUCGAAACAUGCGUACCAAUA 3'  
: : : : : : : : : : : : : : .  
query 3' GUAGCUUUGUACGCGUGGUUUAU 5'  
query=novel\_mir\_152, target=R03G\_16382, score=0, range=916-935,  
strand=1  
target 5' UGCAGCCUUAGACUCCUCA 3'  
: : : : : : : : : : : : : : .  
query 3' ACGUCGGAUUCUGAAGGAGU 5'  
query=novel\_mir\_152, target=R03G\_02484, score=0, range=532-551,  
strand=1  
target 5' UGCAGCCUUAGACUCCUCA 3'  
: : : : : : : : : : : : : : .  
query 3' ACGUCGGAUUCUGAAGGAGU 5'  
query=novel\_mir\_152, target=R03G\_01430, score=0, range=682-701,  
strand=1  
target 5' UGCAGCCUUAGACUCCUCA 3'  
: : : : : : : : : : : : : : .  
query 3' ACGUCGGAUUCUGAAGGAGU 5'  
query=novel\_mir\_152, target=R03G\_12457, score=0.5, range=784-803,  
strand=1  
target 5' UGUAGCCUUAGACUCCUCA 3'  
: : : : : : : : : : : : : : .  
query 3' ACGUCGGAUUCUGAAGGAGU 5'  
query=novel\_mir\_152, target=R03G\_09250, score=1, range=847-866,

strand=1  
target 5' UACAGCCUUAGACUCCUCA 3'  
: ::::::::::::::::::::  
query 3' ACGUCGGAUUCUGAAGGAGU 5'  
query=novel\_mir\_152, target=R03G\_03724, score=1, range=565-584,  
strand=1  
target 5' UGCUGCCUUAGACUCCUCA 3'  
::: ::::::::::::::::::::  
query 3' ACGUCGGAUUCUGAAGGAGU 5'  
query=novel\_mir\_152, target=R03G\_07205, score=2, range=643-662,  
strand=1  
target 5' UGCAGCCUAAGACUCCUCA 3'  
: ::::::::::::::::::::  
query 3' ACGUCGGAUUCUGAAGGAGU 5'  
query=novel\_mir\_152, target=R03G\_15472, score=3, range=809-827,  
strand=-1  
target 5' AGCA-CCUUAGACUUCUUCA 3'  
::: ::::::::::::::::::::  
query 3' ACGUCGGAUUCUGAAGGAGU 5'  
query=novel\_mir\_152, target=R03G\_13123, score=3.5, range=2168-218  
strand=1  
target 5' UGCCUUCUUGGACUCCUCA 3'  
::: .: ::::::::::::::::::::  
query 3' ACGUCGGAUUCUGAAGGAGU 5'  
query=novel\_mir\_152, target=R03G\_09732, score=4, range=824-842,  
strand=-1  
target 5' UUCAG-CUUAGACUUGCUCU 3'  
: ::: ::::::::::::::::::::  
query 3' ACGUCGGAUUCUGAAGGAGU 5'  
query=novel\_mir\_166, target=R03G\_11766, score=0, range=977-999,  
strand=1  
target 5' CUGAUCAAGAAGAAACUUUGGAA 3'  
: ::::::::::::::::::::  
query 3' GACUAGUUCUUCUUUGAAACCUU 5'  
query=novel\_mir\_166, target=R03G\_02843, score=0, range=683-705,  
strand=1  
target 5' CUGAUCAAGAAGAAACUUUGGAA 3'  
: ::::::::::::::::::::  
query 3' GACUAGUUCUUCUUUGAAACCUU 5'  
query=novel\_mir\_166, target=R03G\_01494, score=3.5, range=434-457,  
strand=1  
target 5' CUA AUGUAGGAAGAAACUUUGGAG 3'  
: : .: ::::::::::::::::::::  
query 3' GACUA-GUUCUUCUUUGAAACCUU 5'  
query=novel\_mir\_166, target=R03G\_14199, score=4, range=1471-1494,

```
strand=1
target 5' UUGACCAGUGAAGAAACUUUGGAU 3'
.:.: :.: :.: :.: :.: :.: :.: :.: :.: :.: :.: :.: :.: :.: :.: :.: :.: :.: :.: :.: :.: :.:
query 3' GACUAGUU-CUUCUUUGAAACCUU 5'
query=novel_mir_140, target=R03G_07857, score=0, range=258-279,
strand=1
target 5' CAUCGUGAAUUUAGCAAGCAUA 3'
.:.: :.: :.: :.: :.: :.: :.: :.: :.: :.: :.: :.: :.: :.: :.: :.: :.: :.: :.: :.: :.: :.:
query 3' GUAGCACUUAAAUCGUUCGUAU 5'
query=novel_mir_140, target=R03G_14993, score=0, range=102-123,
strand=1
target 5' CAUCGUGAAUUUAGCAAGCAUA 3'
.:.: :.: :.: :.: :.: :.: :.: :.: :.: :.: :.: :.: :.: :.: :.: :.: :.: :.: :.: :.: :.: :.:
query 3' GUAGCACUUAAAUCGUUCGUAU 5'
query=novel_mir_140, target=R03G_00253, score=0, range=102-123,
strand=1
target 5' CAUCGUGAAUUUAGCAAGCAUA 3'
.:.: :.: :.: :.: :.: :.: :.: :.: :.: :.: :.: :.: :.: :.: :.: :.: :.: :.: :.: :.: :.: :.:
query 3' GUAGCACUUAAAUCGUUCGUAU 5'
query=novel_mir_140, target=R03G_03581, score=0, range=102-123,
strand=1
target 5' CAUCGUGAAUUUAGCAAGCAUA 3'
.:.: :.: :.: :.: :.: :.: :.: :.: :.: :.: :.: :.: :.: :.: :.: :.: :.: :.: :.: :.: :.: :.:
query 3' GUAGCACUUAAAUCGUUCGUAU 5'
query=novel_mir_140, target=R03G_06443, score=0, range=102-123,
strand=1
target 5' CAUCGUGAAUUUAGCAAGCAUA 3'
.:.: :.: :.: :.: :.: :.: :.: :.: :.: :.: :.: :.: :.: :.: :.: :.: :.: :.: :.: :.: :.: :.:
query 3' GUAGCACUUAAAUCGUUCGUAU 5'
query=novel_mir_140, target=R03G_03789, score=0, range=102-123,
strand=1
target 5' CAUCGUGAAUUUAGCAAGCAUA 3'
.:.: :.: :.: :.: :.: :.: :.: :.: :.: :.: :.: :.: :.: :.: :.: :.: :.: :.: :.: :.: :.: :.:
query 3' GUAGCACUUAAAUCGUUCGUAU 5'
query=novel_mir_140, target=R03G_16894, score=0, range=99-120,
strand=1
target 5' CAUCGUGAAUUUAGCAAGCAUA 3'
.:.: :.: :.: :.: :.: :.: :.: :.: :.: :.: :.: :.: :.: :.: :.: :.: :.: :.: :.: :.: :.: :.:
query 3' GUAGCACUUAAAUCGUUCGUAU 5'
query=novel_mir_140, target=R03G_17304, score=0, range=102-123,
strand=1
target 5' CAUCGUGAAUUUAGCAAGCAUA 3'
.:.: :.: :.: :.: :.: :.: :.: :.: :.: :.: :.: :.: :.: :.: :.: :.: :.: :.: :.: :.: :.: :.:
query 3' GUAGCACUUAAAUCGUUCGUAU 5'
query=novel_mir_140, target=R03G_08840, score=1, range=258-279,
```







query=novel\_mir\_140, target=R03G\_17349, score=3, range=99-120,  
strand=1  
target 5' CAUCGUAAAUUCAGCAAGCAUA 3'  
::::: :::: ::::::::::::::  
query 3' GUAGCACUAAAUCGUUCGUAU 5'

query=novel\_mir\_140, target=R03G\_06738, score=3, range=102-123,  
strand=1  
target 5' CAUCGUAAAUCUAGCAAGCAUA 3'  
::::: ::: ::::::::::::::  
query 3' GUAGCACUAAAUCGUUCGUAU 5'

query=novel\_mir\_140, target=R03G\_16701, score=3, range=294-315,  
strand=1  
target 5' CAUCGUAAACUAGCAAGCAUA 3'  
::::: :: ::::::::::::::  
query 3' GUAGCACUAAAUCGUUCGUAU 5'

query=novel\_mir\_140, target=R03G\_07703, score=3, range=258-279,  
strand=1  
target 5' CAUCGUAAACUAGCAAGCAUA 3'  
::::: :: ::::::::::::::  
query 3' GUAGCACUAAAUCGUUCGUAU 5'

query=novel\_mir\_140, target=R03G\_10037, score=3, range=243-264,  
strand=1  
target 5' CAUCGUAAAUCUAGCAAGCAUA 3'  
::::: ::: ::::::::::::::  
query 3' GUAGCACUAAAUCGUUCGUAU 5'

query=novel\_mir\_140, target=R03G\_07680, score=3, range=102-123,  
strand=1  
target 5' CAUCGUAAAUCUAGCAAGCAUA 3'  
::::: ::: ::::::::::::::  
query 3' GUAGCACUAAAUCGUUCGUAU 5'

query=novel\_mir\_140, target=R03G\_14999, score=3, range=102-123,  
strand=1  
target 5' CAUCGUAAAUCUAGCAAGCAUA 3'  
::::: ::: ::::::::::::::  
query 3' GUAGCACUAAAUCGUUCGUAU 5'

query=novel\_mir\_140, target=R03G\_14360, score=3, range=102-123,  
strand=1  
target 5' CAUCGUAAAUCUAGCAAGCAUA 3'  
::::: ::: ::::::::::::::  
query 3' GUAGCACUAAAUCGUUCGUAU 5'

query=novel\_mir\_140, target=R03G\_15156, score=3, range=102-123,  
strand=1  
target 5' CAUCGUAAAUCUAGCAAGCAUA 3'  
::::: ::: ::::::::::::::  
query 3' GUAGCACUAAAUCGUUCGUAU 5'

query=novel\_mir\_140, target=R03G\_14973, score=3, range=102-123,  
strand=1  
target 5' CAUCGUAAAUCUAGCAAGCAUA 3'  
::::: ::: ::::::::::::::  
query 3' GUAGCACUAAAUCGUUCGUAU 5'  
query=novel\_mir\_140, target=R03G\_17237, score=3, range=102-123,  
strand=1  
target 5' CAUCGUAAAUCUAGCAAGCAUA 3'  
::::: ::: ::::::::::::::  
query 3' GUAGCACUAAAUCGUUCGUAU 5'  
query=novel\_mir\_140, target=R03G\_04687, score=3, range=102-123,  
strand=1  
target 5' CAUCGUAAAUCUAGCAAGCAUA 3'  
::::: ::: ::::::::::::::  
query 3' GUAGCACUAAAUCGUUCGUAU 5'  
query=novel\_mir\_140, target=R03G\_14985, score=3, range=102-123,  
strand=1  
target 5' CAUCGUAAAUCUAGCAAGCAUA 3'  
::::: ::: ::::::::::::::  
query 3' GUAGCACUAAAUCGUUCGUAU 5'  
query=novel\_mir\_140, target=R03G\_01202, score=3, range=102-123,  
strand=1  
target 5' CAUCGUAAAUCUAGCAAGCAUA 3'  
::::: ::: ::::::::::::::  
query 3' GUAGCACUAAAUCGUUCGUAU 5'  
query=novel\_mir\_140, target=R03G\_17153, score=3, range=102-123,  
strand=1  
target 5' CAUCGUAAAUUCAGCAAGCAUA 3'  
::::: :::: ::::::::::::::  
query 3' GUAGCACUAAAUCGUUCGUAU 5'  
query=novel\_mir\_140, target=R03G\_05518, score=3, range=21-42, str  
target 5' CAUCGUAAAUUUAGCAAGCUUA 3'  
::::: :::::::::::::: ::  
query 3' GUAGCACUAAAUCGUUCGUAU 5'  
query=novel\_mir\_140, target=R03G\_17266, score=3, range=102-123,  
strand=1  
target 5' CAUCGUAAAUUCAGCAAGCAUA 3'  
::::: :::: ::::::::::::::  
query 3' GUAGCACUAAAUCGUUCGUAU 5'  
query=novel\_mir\_140, target=R03G\_03809, score=3, range=30-51, str  
target 5' CAUCGUAAAUUCAGCAAGCAUA 3'  
::::: :::: ::::::::::::::  
query 3' GUAGCACUAAAUCGUUCGUAU 5'  
query=novel\_mir\_140, target=R03G\_03807, score=3, range=30-51, str  
target 5' CAUCGUAAAUUCAGCAAGCAUA 3'

```
::::: :::: ::::::::::::
query 3' GUAGCACUAAAUCGUUCGUAU 5'
query=novel_mir_140, target=R03G_07298, score=3, range=232-253,
strand=-1
target 5' CAUCGUAAUUUUGGCAAGCAUA 3'
::::: : ::::::::::::
query 3' GUAGCACUAAAUCGUUCGUAU 5'
query=novel_mir_140, target=R03G_17364, score=4, range=258-279,
strand=1
target 5' CAUCGCAAUGUAGCAAGCAUA 3'
::::: ::: ::::::::::::
query 3' GUAGCACUAAAUCGUUCGUAU 5'
query=novel_mir_140, target=R03G_05522, score=4, range=598-619,
strand=-1
target 5' CAUCGUAAAUUUGACAAGCAUA 3'
::::: ::::::. ::::::::::::
query 3' GUAGCACUAAAUCGUUCGUAU 5'
query=novel_mir_140, target=R03G_03112, score=4, range=598-619,
strand=-1
target 5' CAUCGUAAAUUUGACAAGCAUA 3'
::::: ::::::. ::::::::::::
query 3' GUAGCACUAAAUCGUUCGUAU 5'
query=novel_mir_140, target=R03G_00240, score=4, range=541-562,
strand=-1
target 5' CAUCGUAAAUUUGACAAGCAUA 3'
::::: ::::::. ::::::::::::
query 3' GUAGCACUAAAUCGUUCGUAU 5'
query=novel_mir_140, target=R03G_02227, score=4, range=598-619,
strand=-1
target 5' CAUCGUAAAUUUGACAAGCAUA 3'
::::: ::::::. ::::::::::::
query 3' GUAGCACUAAAUCGUUCGUAU 5'
query=novel_mir_140, target=R03G_16737, score=4, range=232-253,
strand=-1
target 5' CAUCGUAAAUUUGACAAGCAUA 3'
::::: ::::::. ::::::::::::
query 3' GUAGCACUAAAUCGUUCGUAU 5'
query=novel_mir_140, target=R03G_10797, score=4, range=232-253,
strand=-1
target 5' CAUCGUAAAUUUGACAAGCAUA 3'
::::: ::::::. ::::::::::::
query 3' GUAGCACUAAAUCGUUCGUAU 5'
query=novel_mir_140, target=R03G_17423, score=4, range=232-253,
strand=-1
target 5' CAUCGUAAAUUUGACAAGCAUA 3'
```

::::: ::::: :::::  
query 3' GUAGCACUAAAUCGUUCGUAU 5'  
query=novel\_mir\_140, target=R03G\_14784, score=4, range=232-253,  
strand=-1  
target 5' CAUCGUAAAUUUGACAAGCAUA 3'  
::::: ::::: :::::  
query 3' GUAGCACUAAAUCGUUCGUAU 5'  
query=novel\_mir\_140, target=R03G\_17092, score=4, range=232-253,  
strand=-1  
target 5' CAUCGUAAAUUUGACAAGCAUA 3'  
::::: ::::: :::::  
query 3' GUAGCACUAAAUCGUUCGUAU 5'  
query=novel\_mir\_140, target=R03G\_16141, score=4, range=232-253,  
strand=-1  
target 5' CAUCGUAAAUUUGACAAGCAUA 3'  
::::: ::::: :::::  
query 3' GUAGCACUAAAUCGUUCGUAU 5'  
query=novel\_mir\_140, target=R03G\_14981, score=4, range=232-253,  
strand=-1  
target 5' CAUCGUAAAUUUGACAAGCAUA 3'  
::::: ::::: :::::  
query 3' GUAGCACUAAAUCGUUCGUAU 5'  
query=novel\_mir\_140, target=R03G\_15286, score=4, range=232-253,  
strand=-1  
target 5' CAUCGUAAAUUUGACAAGCAUA 3'  
::::: ::::: :::::  
query 3' GUAGCACUAAAUCGUUCGUAU 5'  
query=novel\_mir\_140, target=R03G\_13752, score=4, range=232-253,  
strand=-1  
target 5' CAUCGUAAAUUUGACAAGCAUA 3'  
::::: ::::: :::::  
query 3' GUAGCACUAAAUCGUUCGUAU 5'  
query=novel\_mir\_140, target=R03G\_15170, score=4, range=232-253,  
strand=-1  
target 5' CAUCGUAAAUUUGACAAGCAUA 3'  
::::: ::::: :::::  
query 3' GUAGCACUAAAUCGUUCGUAU 5'  
query=novel\_mir\_140, target=R03G\_11536, score=4, range=232-253,  
strand=-1  
target 5' CAUCGUAAAUUUGACAAGCAUA 3'  
::::: ::::: :::::  
query 3' GUAGCACUAAAUCGUUCGUAU 5'  
query=novel\_mir\_140, target=R03G\_12950, score=4, range=232-253,  
strand=-1  
target 5' CAUCGUAAAUUUGACAAGCAUA 3'

::::: ::::: :::::  
query 3' GUAGCACUAAAUCGUUCGUAU 5'  
query=novel\_mir\_140, target=R03G\_01725, score=4, range=232-253,  
strand=-1  
target 5' CAUCGUAAAUUUGACAAGCAUA 3'  
::::: ::::: :::::  
query 3' GUAGCACUAAAUCGUUCGUAU 5'  
query=novel\_mir\_140, target=R03G\_10050, score=4, range=232-253,  
strand=-1  
target 5' CAUCGUAAAUUUGACAAGCAUA 3'  
::::: ::::: :::::  
query 3' GUAGCACUAAAUCGUUCGUAU 5'  
query=novel\_mir\_140, target=R03G\_05516, score=4, range=232-253,  
strand=-1  
target 5' CAUCGUAAAUUUGACAAGCAUA 3'  
::::: ::::: :::::  
query 3' GUAGCACUAAAUCGUUCGUAU 5'  
query=novel\_mir\_140, target=R03G\_15145, score=4, range=232-253,  
strand=-1  
target 5' CAUCGUAAAUUUGACAAGCAUA 3'  
::::: ::::: :::::  
query 3' GUAGCACUAAAUCGUUCGUAU 5'  
query=novel\_mir\_140, target=R03G\_03791, score=4, range=232-253,  
strand=-1  
target 5' CAUCGUAAAUUUGACAAGCAUA 3'  
::::: ::::: :::::  
query 3' GUAGCACUAAAUCGUUCGUAU 5'  
query=novel\_mir\_140, target=R03G\_16541, score=4, range=232-253,  
strand=-1  
target 5' CAUCGUAAAUUUGACAAGCAUA 3'  
::::: ::::: :::::  
query 3' GUAGCACUAAAUCGUUCGUAU 5'  
query=novel\_mir\_140, target=R03G\_09926, score=4, range=232-253,  
strand=-1  
target 5' CAUCGUAAAUUUGACAAGCAUA 3'  
::::: ::::: :::::  
query 3' GUAGCACUAAAUCGUUCGUAU 5'  
query=novel\_mir\_140, target=R03G\_17328, score=4, range=232-253,  
strand=-1  
target 5' CAUCGUAAAUUUGACAAGCAUA 3'  
::::: ::::: :::::  
query 3' GUAGCACUAAAUCGUUCGUAU 5'  
query=novel\_mir\_140, target=R03G\_16124, score=4, range=232-253,  
strand=-1  
target 5' CAUCGUAAAUUUGACAAGCAUA 3'

```
::::: ::::: :::::
query 3' GUAGCACUAAAUCGUUCGUAU 5'
query=novel_mir_140, target=R03G_03560, score=4, range=232-253,
strand=-1
target 5' CAUCGUAAAUUUGACAAGCAUA 3'
::::: ::::: :::::
query 3' GUAGCACUAAAUCGUUCGUAU 5'
query=novel_mir_140, target=R03G_07723, score=4, range=232-253,
strand=-1
target 5' CAUCGUAAAUUUGACAAGCAUA 3'
::::: ::::: :::::
query 3' GUAGCACUAAAUCGUUCGUAU 5'
query=novel_mir_140, target=R03G_11533, score=4, range=232-253,
strand=-1
target 5' CAUCGUAAAUUUGACAAGCAUA 3'
::::: ::::: :::::
query 3' GUAGCACUAAAUCGUUCGUAU 5'
query=novel_mir_140, target=R03G_00250, score=4, range=232-253,
strand=-1
target 5' CAUCGUAAAUUUGACAAGCAUA 3'
::::: ::::: :::::
query 3' GUAGCACUAAAUCGUUCGUAU 5'
query=novel_mir_140, target=R03G_10785, score=4, range=232-253,
strand=-1
target 5' CAUCGUAAAUUUGACAAGCAUA 3'
::::: ::::: :::::
query 3' GUAGCACUAAAUCGUUCGUAU 5'
query=novel_mir_140, target=R03G_13267, score=4, range=232-253,
strand=-1
target 5' CAUCGUAAAUUUGACAAGCAUA 3'
::::: ::::: :::::
query 3' GUAGCACUAAAUCGUUCGUAU 5'
query=novel_mir_140, target=R03G_12084, score=4, range=232-253,
strand=-1
target 5' CAUCGUAAAUUUGACAAGCAUA 3'
::::: ::::: :::::
query 3' GUAGCACUAAAUCGUUCGUAU 5'
query=novel_mir_140, target=R03G_13850, score=4, range=40-61,
strand=-1
target 5' CAUCGCAAUGUAGCAAGCAUA 3'
::::: ::::: :::::
query 3' GUAGCACUAAAUCGUUCGUAU 5'
query=novel_mir_168, target=R03G_08570, score=0, range=13-32, str
target 5' CCGCACAUGAAAGGUCACUA 3'
::::: ::::: :::::
```



query 3' GGCGUGUACUUUCCAGUGAU 5'  
query=novel\_mir\_168, target=R03G\_12457, score=0, range=922-941,  
strand=1  
target 5' CCGCACAUGAAAGGUCACUA 3'  
::::: :::::  
query 3' GGCGUGUACUUUCCAGUGAU 5'  
query=novel\_mir\_168, target=R03G\_16443, score=1, range=22-41, str  
target 5' CCGCACAUGAAAGGUCAUUA 3'  
::::: :::::  
query 3' GGCGUGUACUUUCCAGUGAU 5'  
query=novel\_mir\_168, target=R03G\_01430, score=1, range=820-839,  
strand=1  
target 5' CCGCACAUGAAAGGUCACUU 3'  
::::: :::::  
query 3' GGCGUGUACUUUCCAGUGAU 5'  
query=novel\_mir\_168, target=R03G\_03724, score=1, range=703-722,  
strand=1  
target 5' CCACACAUGAAAGGUCACUA 3'  
:: :::::  
query 3' GGCGUGUACUUUCCAGUGAU 5'  
query=novel\_mir\_168, target=R03G\_17048, score=1.5, range=28-47,  
strand=1  
target 5' CCGCAUAUGAAAGGUUACUA 3'  
::::: :::::  
query 3' GGCGUGUACUUUCCAGUGAU 5'  
query=novel\_mir\_168, target=R03G\_15794, score=1.5, range=241-260,  
strand=1  
target 5' CCACAUAUGAAAGGUCACUA 3'  
:: :::::  
query 3' GGCGUGUACUUUCCAGUGAU 5'  
query=novel\_mir\_168, target=R03G\_16382, score=2, range=1054-1073,  
strand=1  
target 5' CCGAACAUUGAAAGGUCAUUA 3'  
::: :::::  
query 3' GGCGUGUACUUUCCAGUGAU 5'  
query=novel\_mir\_168, target=R03G\_15207, score=2, range=241-260,  
strand=1  
target 5' CUACAUAUGAAAGGUCACUA 3'  
:. :::::  
query 3' GGCGUGUACUUUCCAGUGAU 5'  
query=novel\_mir\_168, target=R03G\_08647, score=3, range=463-482,  
strand=1  
target 5' UCUCAUAUGAAAGGUCAUUA 3'  
.: :::::  
query 3' GGCGUGUACUUUCCAGUGAU 5'

query=novel\_mir\_168, target=R03G\_03146, score=3.5, range=601-620,  
strand=1  
target 5' CUGCACAUGAAAGGACAUUA 3'  
:.....: :  
query 3' GGCGUGUACUUUCCAGUGAU 5'  
query=novel\_mir\_168, target=R03G\_09250, score=3.5, range=985-1004  
strand=1  
target 5' CUGCACAUGAAAGGCCAUUA 3'  
:.....: :  
query 3' GGCGUGUACUUUCCAGUGAU 5'  
query=novel\_mir\_168, target=R03G\_01842, score=3.5, range=676-695,  
strand=1  
target 5' CCACAUUAUGAAAGGCCACUA 3'  
: :.....: :  
query 3' GGCGUGUACUUUCCAGUGAU 5'  
query=novel\_mir\_168, target=R03G\_11364, score=3.5, range=898-917,  
strand=1  
target 5' CCACAUUAUGAAAGGCCACUA 3'  
: :.....: :  
query 3' GGCGUGUACUUUCCAGUGAU 5'  
query=novel\_mir\_168, target=R03G\_01465, score=3.5, range=241-260,  
strand=1  
target 5' CCACAUUAUGAAAGGCCACUA 3'  
: :.....: :  
query 3' GGCGUGUACUUUCCAGUGAU 5'  
query=novel\_mir\_168, target=R03G\_02484, score=4, range=670-689,  
strand=1  
target 5' CCACACAUGAAAGAUCAUUA 3'  
: :.....: :  
query 3' GGCGUGUACUUUCCAGUGAU 5'  
query=novel\_mir\_168, target=R03G\_12619, score=4, range=440-460,  
strand=-1  
target 5' AAUCAUCAUGAAAGGUCACUA 3'  
: :.....: :  
query 3' GGCGU-GUACUUUCCAGUGAU 5'  
query=novel\_mir\_183, target=R03G\_16701, score=3.5, range=220-242,  
strand=-1  
target 5' AUAAAUGGCCUAGUUAUGUAGUA 3'  
: :.....: :  
query 3' UG-UUACCGGAUCAAGACAUCAU 5'  
query=novel\_mir\_183, target=R03G\_17208, score=3.5, range=178-200,  
strand=-1  
target 5' AUAAAUGGCCUAGUUAUGUAGUA 3'  
: :.....: :  
query 3' UG-UUACCGGAUCAAGACAUCAU 5'

query=novel\_mir\_151, target=R03G\_01318, score=1, range=14-36,  
 strand=-1  
 target 5' CAUGCACCAGUUUUGACGGCGU 3'  
 :::::::::::::::::::::  
 query 3' GUACGUGGUCAAACUGCCGUA 5'  
 query=novel\_mir\_151, target=R03G\_00684, score=3, range=1581-1603,  
 strand=-1  
 target 5' CAUGCACCAGUUUUGACGGCCA 3'  
 :::::::::::::::::::::  
 query 3' GUACGUGGUCAAACUGCCGUA 5'  
 query=novel\_mir\_151, target=R03G\_15882, score=3, range=806-828,  
 strand=-1  
 target 5' CAUGCACCAGUUUUGACGGCCA 3'  
 :::::::::::::::::::::  
 query 3' GUACGUGGUCAAACUGCCGUA 5'  
 query=novel\_mir\_151, target=R03G\_01315, score=3, range=801-823,  
 strand=-1  
 target 5' CAUGCACCAGUUUUGACGGCCA 3'  
 :::::::::::::::::::::  
 query 3' GUACGUGGUCAAACUGCCGUA 5'  
 query=novel\_mir\_151, target=R03G\_03787, score=3, range=410-432,  
 strand=-1  
 target 5' CAUGCACCAGUUUUGACGGCCA 3'  
 :::::::::::::::::::::  
 query 3' GUACGUGGUCAAACUGCCGUA 5'  
 query=novel\_mir\_144, target=R03G\_12520, score=0, range=1145-1166,  
 strand=1  
 target 5' CUUAUGACACUGUUGACCGUAA 3'  
 :::::::::::::::::::::  
 query 3' GAAUACUGUGACAACUGGCAUU 5'  
 query=novel\_mir\_144, target=R03G\_00797, score=0, range=1145-1166,  
 strand=1  
 target 5' CUUAUGACACUGUUGACCGUAA 3'  
 :::::::::::::::::::::  
 query 3' GAAUACUGUGACAACUGGCAUU 5'  
 query=novel\_mir\_144, target=R03G\_16838, score=4, range=1117-1137,  
 strand=-1  
 target 5' UUUUAU-CCACUGUUGAUCGUAG 3'  
 .::::: :::::::::::::::::::::  
 query 3' GAAUACUGUGACAACUGGCAUU 5'  
 query=novel\_mir\_175, target=R03G\_17362, score=3.5, range=943-962,  
 strand=-1  
 target 5' UCUCUACAGUCUUCUGCUG 3'  
 ::::::::::::::::::::: . .  
 query 3' AGAGGAUGUCAGAAGAUAUU 5'

query=novel\_mir\_175, target=R03G\_04804, score=3.5, range=944-963,  
strand=-1

target 5' UCUCCUACAGUCUUCUGCUG 3'

..... :.

query 3' AGAGGAUGUCAGAAGAUAAU 5'

query=novel\_mir\_175, target=R03G\_00293, score=3.5, range=944-963,  
strand=-1

target 5' UCUCCUACAGUCUUCUGCUG 3'

..... :.

query 3' AGAGGAUGUCAGAAGAUAAU 5'

query=novel\_mir\_175, target=R03G\_13705, score=3.5, range=944-963,  
strand=-1

target 5' UCUCCUACAGUCUUCUGCUG 3'

..... :.

query 3' AGAGGAUGUCAGAAGAUAAU 5'

query=novel\_mir\_175, target=R03G\_11265, score=3.5, range=944-963,  
strand=-1

target 5' UCUCCUACAGUCUUCUGCUG 3'

..... :.

query 3' AGAGGAUGUCAGAAGAUAAU 5'

query=novel\_mir\_175, target=R03G\_07023, score=3.5, range=944-963,  
strand=-1

target 5' UCUCCUACAGUCUUCUGCUG 3'

..... :.

query 3' AGAGGAUGUCAGAAGAUAAU 5'

query=novel\_mir\_175, target=R03G\_04806, score=3.5, range=944-963,  
strand=-1

target 5' UCUCCUACAGUCUUCUGCUG 3'

..... :.

query 3' AGAGGAUGUCAGAAGAUAAU 5'

query=novel\_mir\_175, target=R03G\_11474, score=3.5, range=944-963,  
strand=-1

target 5' UCUCCUACAGUCUUCUGCUG 3'

..... :.

query 3' AGAGGAUGUCAGAAGAUAAU 5'

query=novel\_mir\_175, target=R03G\_15272, score=3.5, range=944-963,  
strand=-1

target 5' UCUCCUACAGUCUUCUGCUG 3'

..... :.

query 3' AGAGGAUGUCAGAAGAUAAU 5'

query=novel\_mir\_175, target=R03G\_14992, score=3.5, range=944-963,  
strand=-1

target 5' UCUCCUACAGUCUUCUGCUG 3'

..... :.

query 3' AGAGGAUGUCAGAAGAUAAU 5'

query=novel\_mir\_175, target=R03G\_01583, score=3.5, range=944-963,  
strand=-1  
target 5' UCUCCUACAGUCUUCUGCUG 3'  
:.:  
query 3' AGAGGAUGUCAGAAGAUAUU 5'  
query=novel\_mir\_175, target=R03G\_17445, score=3.5, range=944-963,  
strand=-1  
target 5' UCUCCUACAGUCUUCUGCUG 3'  
:.:  
query 3' AGAGGAUGUCAGAAGAUAUU 5'  
query=novel\_mir\_175, target=R03G\_12543, score=3.5, range=944-963,  
strand=-1  
target 5' UCUCCUACAGUCUUCUGCUG 3'  
:.:  
query 3' AGAGGAUGUCAGAAGAUAUU 5'  
query=novel\_mir\_175, target=R03G\_03122, score=3.5, range=944-963,  
strand=-1  
target 5' UCUCCUACAGUCUUCUGCUG 3'  
:.:  
query 3' AGAGGAUGUCAGAAGAUAUU 5'  
query=novel\_mir\_175, target=R03G\_17317, score=3.5, range=944-963,  
strand=-1  
target 5' UCUCCUACAGUCUUCUGCUG 3'  
:.:  
query 3' AGAGGAUGUCAGAAGAUAUU 5'  
query=novel\_mir\_175, target=R03G\_13299, score=3.5, range=944-963,  
strand=-1  
target 5' UCUCCUACAGUCUUCUGCUG 3'  
:.:  
query 3' AGAGGAUGUCAGAAGAUAUU 5'  
query=novel\_mir\_175, target=R03G\_07979, score=3.5, range=380-399,  
strand=-1  
target 5' UCUCCUACAGUCUUCUGCUG 3'  
:.:  
query 3' AGAGGAUGUCAGAAGAUAUU 5'  
query=novel\_mir\_175, target=R03G\_13268, score=3.5, range=866-885,  
strand=-1  
target 5' UCUCCUACAGUCUUCUGCUG 3'  
:.:  
query 3' AGAGGAUGUCAGAAGAUAUU 5'  
query=novel\_mir\_175, target=R03G\_10778, score=3.5, range=629-648,  
strand=-1  
target 5' UCUCCUACAGUCUUCUGCUG 3'  
:.:  
query 3' AGAGGAUGUCAGAAGAUAUU 5'

query=novel\_mir\_175, target=R03G\_02588, score=3.5, range=8-26,  
strand=-1  
target 5' UCUUCAAC-GUCUUCUAUUA 3'  
::::: :: ::::::::::::::  
query 3' AGAGGAUGUCAGAAGAUAAU 5'  
query=novel\_mir\_175, target=R03G\_10700, score=4, range=158-178,  
strand=1  
target 5' UUUCUUCACAGUCUUCUCUUA 3'  
::::: :::::::::::::: :::  
query 3' AGAGGA-UGUCAGAAGAUAAU 5'  
query=novel\_mir\_175, target=R03G\_06036, score=4, range=2157-2175,  
strand=1  
target 5' UC-CCUUCAGUCCUCUAUUA 3'  
:: :::: ::::::: ::::::::::  
query 3' AGAGGAUGUCAGAAGAUAAU 5'  
query=novel\_mir\_175, target=R03G\_03014, score=4, range=126-144,  
strand=-1  
target 5' UCUUUUAUAGUCUUC-AUUA 3'  
::::: :::::::::::::: :::::  
query 3' AGAGGAUGUCAGAAGAUAAU 5'  
query=novel\_mir\_175, target=R03G\_06545, score=4, range=359-378,  
strand=-1  
target 5' UCUCUUCAGUCUUCGAUUG 3'  
::::: :::::::::::::: ::::.  
query 3' AGAGGAUGUCAGAAGAUAAU 5'  
query=novel\_mir\_200, target=R03G\_07873, score=1, range=808-829,  
strand=-1  
target 5' CAUUGGCAGCACGGUUGUCAUA 3'  
: ::::::::::::::: ::::::::::  
query 3' GCAACCGUCGUGCCAACAGUAU 5'  
query=novel\_mir\_200, target=R03G\_05922, score=1, range=307-328,  
strand=-1  
target 5' CAUUGGCAGCACGGUUGUCAUA 3'  
: ::::::::::::::: ::::::::::  
query 3' GCAACCGUCGUGCCAACAGUAU 5'  
query=novel\_mir\_200, target=R03G\_13728, score=2, range=796-817,  
strand=-1  
target 5' CAUUGGCAACACGGUUGUCAUA 3'  
: ::::::: ::::::::::::::: ::::::::::  
query 3' GCAACCGUCGUGCCAACAGUAU 5'  
query=novel\_mir\_200, target=R03G\_05273, score=2.5, range=292-313,  
strand=-1  
target 5' CAUUGACAGCACGGUUGUCAUG 3'  
: ::::: ::::::::::::::: ::::::::::.  
query 3' GCAACCGUCGUGCCAACAGUAU 5'



query=novel\_mir\_159, target=R03G\_06436, score=1, range=70-91,  
strand=-1  
target 5' GUCUCUGCCACAAAUCGUUUAA 3'  
:~::~:  
query 3' CAGAGACGGUGUUUGGCAAAUU 5'  
query=novel\_mir\_159, target=R03G\_17432, score=1, range=70-91,  
strand=-1  
target 5' GUCUCUGCCACAAAUCGUUUAA 3'  
:~::~:  
query 3' CAGAGACGGUGUUUGGCAAAUU 5'  
query=novel\_mir\_159, target=R03G\_03577, score=1, range=70-91,  
strand=-1  
target 5' GUCUCUGCCACAAAUCGUUUAA 3'  
:~::~:  
query 3' CAGAGACGGUGUUUGGCAAAUU 5'  
query=novel\_mir\_159, target=R03G\_10530, score=1, range=70-91,  
strand=-1  
target 5' GUCUCUGCCACAAAUCGUUUAA 3'  
:~::~:  
query 3' CAGAGACGGUGUUUGGCAAAUU 5'  
query=novel\_mir\_159, target=R03G\_12546, score=1, range=70-91,  
strand=-1  
target 5' GUCUCUGCCACAAAUCGUUUAA 3'  
:~::~:  
query 3' CAGAGACGGUGUUUGGCAAAUU 5'  
query=novel\_mir\_193, target=R03G\_07580, score=0, range=90-109,  
strand=1  
target 5' ACUUGACUUCAAAUCAUACA 3'  
:~::~:  
query 3' UGAACUGAAGUUUAGUAUGU 5'  
query=novel\_mir\_193, target=R03G\_01923, score=0, range=315-334,  
strand=1  
target 5' ACUUGACUUCAAAUCAUACA 3'  
:~::~:  
query 3' UGAACUGAAGUUUAGUAUGU 5'  
query=novel\_mir\_193, target=R03G\_02936, score=0, range=366-385,  
strand=1  
target 5' ACUUGACUUCAAAUCAUACA 3'  
:~::~:  
query 3' UGAACUGAAGUUUAGUAUGU 5'  
query=novel\_mir\_193, target=R03G\_05133, score=0.5, range=315-334,  
strand=1  
target 5' ACUUGAUUUCAAAUCAUACA 3'  
:~::~:  
query 3' UGAACUGAAGUUUAGUAUGU 5'



query=novel\_mir\_193, target=R03G\_11486, score=1, range=138-157,  
strand=1  
target 5' ACUUGACUUCAAAUCGUACA 3'  
:::::::::::::::::::::  
query 3' UGAACUGAAGUUUAGUAUGU 5'  
query=novel\_mir\_193, target=R03G\_08301, score=1, range=291-310,  
strand=1  
target 5' ACUUGACUUCAAAUCGUACA 3'  
:::::::::::::::::::::  
query 3' UGAACUGAAGUUUAGUAUGU 5'  
query=novel\_mir\_193, target=R03G\_13799, score=1, range=63-82, str  
target 5' ACUUGACUUCAAAUCGUACA 3'  
:::::::::::::::::::::  
query 3' UGAACUGAAGUUUAGUAUGU 5'  
query=novel\_mir\_193, target=R03G\_09419, score=1, range=186-205,  
strand=1  
target 5' ACUUGACUUCAAAUCGUACA 3'  
:::::::::::::::::::::  
query 3' UGAACUGAAGUUUAGUAUGU 5'  
query=novel\_mir\_193, target=R03G\_16429, score=1, range=78-97, str  
target 5' ACUUGACUUCAAAUCGUACA 3'  
:::::::::::::::::::::  
query 3' UGAACUGAAGUUUAGUAUGU 5'  
query=novel\_mir\_193, target=R03G\_02348, score=1, range=78-97, str  
target 5' ACUUGACUUCAAGUCAUACA 3'  
:::::::::::::::::::::  
query 3' UGAACUGAAGUUUAGUAUGU 5'  
query=novel\_mir\_193, target=R03G\_14806, score=1, range=273-292,  
strand=1  
target 5' ACUUGACUUCAAAUCGUACA 3'  
:::::::::::::::::::::  
query 3' UGAACUGAAGUUUAGUAUGU 5'  
query=novel\_mir\_193, target=R03G\_07788, score=1, range=315-334,  
strand=1  
target 5' ACUUGACUUCAAAUCGUACA 3'  
:::::::::::::::::::::  
query 3' UGAACUGAAGUUUAGUAUGU 5'  
query=novel\_mir\_193, target=R03G\_01636, score=1, range=315-334,  
strand=1  
target 5' ACUUGACUUCAAAUCGUACA 3'  
:::::::::::::::::::::  
query 3' UGAACUGAAGUUUAGUAUGU 5'  
query=novel\_mir\_193, target=R03G\_15496, score=1, range=9-28, stra  
target 5' ACUUGACUUCAAAUCGUACA 3'  
:::::::::::::::::::::

query 3' UGAACUGAAGUUUAGUAUGU 5'  
query=novel\_mir\_193, target=R03G\_04110, score=1, range=63-82, str  
target 5' ACUUGACUUCAAAUCGUACA 3'  
::::::::::::::::::::  
query 3' UGAACUGAAGUUUAGUAUGU 5'  
query=novel\_mir\_193, target=R03G\_04104, score=1, range=63-82, str  
target 5' ACUUGACUUCAAAUCGUACA 3'  
::::::::::::::::::::  
query 3' UGAACUGAAGUUUAGUAUGU 5'  
query=novel\_mir\_193, target=R03G\_09838, score=1, range=138-157,  
strand=1  
target 5' ACUUGACUUCAAAUCGUACA 3'  
::::::::::::::::::::  
query 3' UGAACUGAAGUUUAGUAUGU 5'  
query=novel\_mir\_193, target=R03G\_13664, score=1, range=366-385,  
strand=1  
target 5' ACUUGACUUCAAAUCGUACA 3'  
::::::::::::::::::::  
query 3' UGAACUGAAGUUUAGUAUGU 5'  
query=novel\_mir\_193, target=R03G\_14722, score=1, range=366-385,  
strand=1  
target 5' ACUUGACUUCAAAUCGUACA 3'  
::::::::::::::::::::  
query 3' UGAACUGAAGUUUAGUAUGU 5'  
query=novel\_mir\_193, target=R03G\_13903, score=1, range=366-385,  
strand=1  
target 5' ACUUGACUUCAAAUCGUACA 3'  
::::::::::::::::::::  
query 3' UGAACUGAAGUUUAGUAUGU 5'  
query=novel\_mir\_193, target=R03G\_02354, score=1, range=366-385,  
strand=1  
target 5' ACUUGACUUCAAAUCGUACA 3'  
::::::::::::::::::::  
query 3' UGAACUGAAGUUUAGUAUGU 5'  
query=novel\_mir\_193, target=R03G\_05181, score=1, range=366-385,  
strand=1  
target 5' ACUUGACUUCAAAUCGUACA 3'  
::::::::::::::::::::  
query 3' UGAACUGAAGUUUAGUAUGU 5'  
query=novel\_mir\_193, target=R03G\_13672, score=1, range=366-385,  
strand=1  
target 5' ACUUGACUUCAAAUCGUACA 3'  
::::::::::::::::::::  
query 3' UGAACUGAAGUUUAGUAUGU 5'  
query=novel\_mir\_193, target=R03G\_05303, score=1, range=366-385,

```
strand=1
target 5' ACUUGACUUCAAAUCGUACA 3'
::::::::::::::::::::::::::
query 3' UGAACUGAAGUUUAGUAUGU 5'
query=novel_mir_193, target=R03G_05194, score=1, range=366-385,
strand=1
target 5' ACUUGACUUCAAAUCGUACA 3'
::::::::::::::::::::::::::
query 3' UGAACUGAAGUUUAGUAUGU 5'
query=novel_mir_193, target=R03G_08906, score=1, range=366-385,
strand=1
target 5' ACUUGACUUCAAAUCGUACA 3'
::::::::::::::::::::::::::
query 3' UGAACUGAAGUUUAGUAUGU 5'
query=novel_mir_193, target=R03G_01528, score=1, range=93-112,
strand=1
target 5' ACUUGACUUCAAAUCGUACA 3'
::::::::::::::::::::::::::
query 3' UGAACUGAAGUUUAGUAUGU 5'
query=novel_mir_193, target=R03G_14467, score=1, range=63-82, str
target 5' ACUUGACUUCAAAUCGUACA 3'
::::::::::::::::::::::::::
query 3' UGAACUGAAGUUUAGUAUGU 5'
query=novel_mir_193, target=R03G_02016, score=1.5, range=63-82,
strand=1
target 5' AUUUGACUUCAAAUCGUACA 3'
::::::::::::::::::::::::::
query 3' UGAACUGAAGUUUAGUAUGU 5'
query=novel_mir_193, target=R03G_10000, score=2, range=63-82, str
target 5' ACUUGACUUCGAAUCGUACA 3'
::::::::::::::::::::::::::
query 3' UGAACUGAAGUUUAGUAUGU 5'
query=novel_mir_193, target=R03G_11567, score=2, range=1218-1237,
strand=1
target 5' ACUUGACUUCAAAUCGUAUA 3'
::::::::::::::::::::::::::
query 3' UGAACUGAAGUUUAGUAUGU 5'
query=novel_mir_193, target=R03G_02168, score=2, range=315-334,
strand=1
target 5' ACUUGACUUUAAAUCGUACA 3'
::::::::::::::::::::::::::
query 3' UGAACUGAAGUUUAGUAUGU 5'
query=novel_mir_193, target=R03G_09656, score=2, range=63-82, str
target 5' ACUUGCCUUCAAAUCGUACA 3'
::::: ::::::::::::::::::::
```

query 3' UGAACUGAAGUUUAGUAUGU 5'  
query=novel\_mir\_193, target=R03G\_14123, score=2, range=56-75, str  
target 5' ACUUGCCUUCAAAUCGUACA 3'  
::::: :::::::::::::::  
query 3' UGAACUGAAGUUUAGUAUGU 5'  
query=novel\_mir\_193, target=R03G\_07273, score=2, range=63-82, str  
target 5' ACUUGCCUUCAAAUCGUACA 3'  
::::: :::::::::::::::  
query 3' UGAACUGAAGUUUAGUAUGU 5'  
query=novel\_mir\_193, target=R03G\_07438, score=2, range=63-82, str  
target 5' ACUUGCCUUCAAAUCGUACA 3'  
::::: :::::::::::::::  
query 3' UGAACUGAAGUUUAGUAUGU 5'  
query=novel\_mir\_193, target=R03G\_08649, score=2, range=93-112,  
strand=1  
target 5' ACUCGACUUCAAAUCGUACA 3'  
::: :::::::::::::::  
query 3' UGAACUGAAGUUUAGUAUGU 5'  
query=novel\_mir\_193, target=R03G\_01545, score=2, range=330-349,  
strand=1  
target 5' ACUUGCCUUCAAAUCGUACA 3'  
::::: :::::::::::::::  
query 3' UGAACUGAAGUUUAGUAUGU 5'  
query=novel\_mir\_193, target=R03G\_15745, score=2, range=63-82, str  
target 5' ACUCGACUUCGAAUCAUACA 3'  
::: :::::::::::::::  
query 3' UGAACUGAAGUUUAGUAUGU 5'  
query=novel\_mir\_193, target=R03G\_07375, score=2.5, range=491-510,  
strand=-1  
target 5' ACUUGAUCUCAAUCAUACA 3'  
::::: . :::::::::::::::  
query 3' UGAACUGAAGUUUAGUAUGU 5'  
query=novel\_mir\_193, target=R03G\_09821, score=3, range=63-82, str  
target 5' ACUUGACUUCAAACCGUACA 3'  
::::: :::::::::::::::  
query 3' UGAACUGAAGUUUAGUAUGU 5'  
query=novel\_mir\_193, target=R03G\_13574, score=3, range=144-163,  
strand=1  
target 5' ACUUGACCUCAAGUCAUACA 3'  
::::: :::::::::::::::  
query 3' UGAACUGAAGUUUAGUAUGU 5'  
query=novel\_mir\_193, target=R03G\_13582, score=3, range=170-189,  
strand=1  
target 5' ACUUGACCUCAAGUCAUACA 3'  
::::: :::::::::::::::

query 3' UGAACUGAAGUUUAGUAUGU 5'  
query=novel\_mir\_193, target=R03G\_09279, score=3, range=132-151,  
strand=1  
target 5' ACGUGCCUUCAAAUCGUACA 3'  
:: :: :::::::::::::::  
query 3' UGAACUGAAGUUUAGUAUGU 5'  
query=novel\_mir\_193, target=R03G\_02901, score=3, range=254-273,  
strand=-1  
target 5' CUUUGAUUUCGAAUCAUACA 3'  
.::::.::::.::::.:::::  
query 3' UGAACUGAAGUUUAGUAUGU 5'  
query=novel\_mir\_193, target=R03G\_14365, score=3.5, range=258-277,  
strand=1  
target 5' AUUUGACUCCAAAUCGUACA 3'  
:.....: :.....: :.....:  
query 3' UGAACUGAAGUUUAGUAUGU 5'  
query=novel\_mir\_193, target=R03G\_01013, score=3.5, range=63-82,  
strand=1  
target 5' ACUCGGAUUCAAAAUCGUACA 3'  
::: :. :.....: :.....:  
query 3' UGAACUGAAGUUUAGUAUGU 5'  
query=novel\_mir\_193, target=R03G\_00277, score=3.5, range=1887-190  
strand=1  
target 5' AC-UGAUUUCAAAUAUACA 3'  
:: :.....: :.....:  
query 3' UGAACUGAAGUUUAGUAUGU 5'  
query=novel\_mir\_193, target=R03G\_02753, score=3.5, range=705-723,  
strand=1  
target 5' AUCUG-CUUCAAAUCAUUA 3'  
:. :: :.....: :.....:  
query 3' UGAACUGAAGUUUAGUAUGU 5'  
query=novel\_mir\_193, target=R03G\_03632, score=3.5, range=418-436,  
strand=-1  
target 5' ACUUG-UUACAAAUCAUACA 3'  
:.....: .: :.....: :.....:  
query 3' UGAACUGAAGUUUAGUAUGU 5'  
query=novel\_mir\_193, target=R03G\_12639, score=4, range=293-312,  
strand=1  
target 5' AAUUGCCUUCAAAGCAUACA 3'  
: ::: :.....: :.....:  
query 3' UGAACUGAAGUUUAGUAUGU 5'  
query=novel\_mir\_193, target=R03G\_06933, score=4, range=598-617,  
strand=1  
target 5' UCUACACUUCAAAUCAUACC 3'  
:: :.....: :.....:

query 3' UGAACUGAAGUUUAGUAUGU 5'  
query=novel\_mir\_193, target=R03G\_04817, score=4, range=69-87, str  
target 5' ACUCG-CUUCAAAUAUACA 3'  
::: : ::::::::::: :::::  
query 3' UGAACUGAAGUUUAGUAUGU 5'  
query=novel\_mir\_193, target=R03G\_03188, score=4, range=366-384,  
strand=1  
target 5' UCUUUA-UUCAAAUCAUACC 3'  
::: : ::::::::::: :::::  
query 3' UGAACUGAAGUUUAGUAUGU 5'  
query=novel\_mir\_193, target=R03G\_06219, score=4, range=23-41,  
strand=-1  
target 5' AAUUG-CUUCAAAUCAUAGA 3'  
: ::: ::::::::::: :  
query 3' UGAACUGAAGUUUAGUAUGU 5'  
query=novel\_mir\_150, target=R03G\_07130, score=1.5, range=1406-142  
strand=1  
target 5' UUA AAAUACAGUGGCCGUCAA 3'  
.::: ::::::::::: :::::  
query 3' GAUUAUAUGUCACCGGCAGUUU 5'  
query=novel\_mir\_150, target=R03G\_03787, score=1.5, range=399-420,  
strand=1  
target 5' CAGUAUACAGUGGCCGUCAA 3'  
: .::: ::::::::::: :::::  
query 3' GAUUAUAUGUCACCGGCAGUUU 5'  
query=novel\_mir\_150, target=R03G\_00684, score=2.5, range=1570-159  
strand=1  
target 5' UUAUCUACAGUGGCCGUCAA 3'  
. : ::: ::::::::::: :::::  
query 3' GAUUAUAUGUCACCGGCAGUUU 5'  
query=novel\_mir\_150, target=R03G\_15882, score=2.5, range=795-816,  
strand=1  
target 5' UCAACAUACAGUGGCCGUCAA 3'  
. : ::: ::::::::::: :::::  
query 3' GAUUAUAUGUCACCGGCAGUUU 5'  
query=novel\_mir\_150, target=R03G\_16819, score=3, range=283-304,  
strand=1  
target 5' UCAAGGUACAGUGGCCGUCAA 3'  
. : ::: .::: ::::::::::: :::::  
query 3' GAUUAUAUGUCACCGGCAGUUU 5'  
query=novel\_mir\_150, target=R03G\_15883, score=3.5, range=12-33,  
strand=-1  
target 5' GACGUAUACAGUGGCCGUCAA 3'  
.::: ::::::::::: :::::  
query 3' GAUUAUAUGUCACCGGCAGUUU 5'









query=novel\_mir\_154, target=R03G\_04133, score=1, range=25-46, str  
target 5' ACCUCUACAACAGAUGAACCUA 3'  
: :::::::::::::::::::::  
query 3' UAGAGAUGUUGUCUACUUGGAU 5'  
query=novel\_mir\_154, target=R03G\_13308, score=2, range=196-217,  
strand=1  
target 5' AUUUCUAUAACAGAUGAACUUA 3'  
:::.....  
query 3' UAGAGAUGUUGUCUACUUGGAU 5'  
query=novel\_mir\_154, target=R03G\_09415, score=2, range=208-229,  
strand=1  
target 5' AUCUCUACAACAGAUAAACCUA 3'  
: :::::::::::::::::::::  
query 3' UAGAGAUGUUGUCUACUUGGAU 5'  
query=novel\_mir\_154, target=R03G\_02996, score=3.5, range=821-841,  
strand=1  
target 5' AGUUCU-UGACAGAUGAACCUA 3'  
: .::: ..:::::::::::::::::::  
query 3' UAGAGAUGUUGUCUACUUGGAU 5'  
query=novel\_mir\_154, target=R03G\_09689, score=4, range=1231-1252,  
strand=1  
target 5' AUCUGUACGAUGGAUGAACCUG 3'  
: ::: :::::::::::::::::::::  
query 3' UAGAGAUGUUGUCUACUUGGAU 5'  
query=novel\_mir\_154, target=R03G\_16460, score=4, range=4453-4474,  
strand=1  
target 5' AUGACUGUGACAGAUGAACCUG 3'  
: ::: :::::::::::::::::::::  
query 3' UAGAGAUGUUGUCUACUUGGAU 5'  
query=novel\_mir\_154, target=R03G\_02928, score=4, range=47-68,  
strand=-1  
target 5' UCCUCAUAACAGAUGAACCUG 3'  
: ::: :::::::::::::::::::::  
query 3' UAGAGAUGUUGUCUACUUGGAU 5'  
query=novel\_mir\_164, target=R03G\_12001, score=1.5, range=617-639,  
strand=1  
target 5' GUAAAACUCGUCUGACAGUUGGG 3'  
: ::: :::::::::::::::::::::  
query 3' CAUUUCGAGCAGACUGUCAACCU 5'  
query=novel\_mir\_164, target=R03G\_10556, score=1.5, range=617-639,  
strand=1  
target 5' GUAAAACUCGUCUGACAGUUGGG 3'  
: ::: :::::::::::::::::::::  
query 3' CAUUUCGAGCAGACUGUCAACCU 5'  
query=novel\_mir\_164, target=R03G\_17369, score=1.5, range=617-639,

strand=1  
target 5' GUAAAACUCGUCUGACAGUUGGG 3'  
::::: ::::::::::::::::::::.  
query 3' CAUUUCGAGCAGACUGUCAACCU 5'  
query=novel\_mir\_164, target=R03G\_00617, score=1.5, range=461-483,  
strand=1  
target 5' GUAAAACUCGUCUGACAGUUGGG 3'  
::::: ::::::::::::::::::::.  
query 3' CAUUUCGAGCAGACUGUCAACCU 5'  
query=novel\_mir\_164, target=R03G\_01302, score=1.5, range=188-210,  
strand=1  
target 5' GUAAAACUCGUCUGACAGUUGGG 3'  
::::: ::::::::::::::::::::.  
query 3' CAUUUCGAGCAGACUGUCAACCU 5'  
query=novel\_mir\_164, target=R03G\_10264, score=3, range=635-657,  
strand=1  
target 5' GUAAAACUCGUCUAACAGUUGGA 3'  
::::: ::::::::::: :::::::::::::::  
query 3' CAUUUCGAGCAGACUGUCAACCU 5'  
query=novel\_mir\_178, target=R03G\_13380, score=3, range=78-99,  
strand=-1  
target 5' CUUGCUCUUCUUCAUAUCGUUA 3'  
::::: ::::::::::: :::::::::::::::  
query 3' GAACGAGAAGAAAUAUAGUAAU 5'  
query=novel\_mir\_178, target=R03G\_17107, score=3, range=123-143,  
strand=-1  
target 5' CUUGAU-UUCUUUAUAUCAUUU 3'  
::::: : :::::::::::::::::::::  
query 3' GAACGAGAAGAAAUAUAGUAAU 5'  
query=novel\_mir\_178, target=R03G\_15327, score=4, range=1579-1600,  
strand=1  
target 5' CUUGCCUUAUUUUUAUAUCAUUG 3'  
::::: .: ::::::::::::::::::::.  
query 3' GAACGAGAAGAAAUAUAGUAAU 5'  
query=novel\_mir\_178, target=R03G\_11898, score=4, range=1075-1096,  
strand=1  
target 5' GUUGGUCUUCUCUAUAUCAUUA 3'  
::: ::::::::::: :::::::::::::::  
query 3' GAACGAGAAGAAAUAUAGUAAU 5'  
query=novel\_mir\_178, target=R03G\_06765, score=4, range=226-248,  
strand=1  
target 5' CUUGGUACUUGUUUAUAUCAUUA 3'  
::::: : ::: :::::::::::::::::::::  
query 3' GAACGA-GAAGAAAUAUAGUAAU 5'  
query=novel\_mir\_178, target=R03G\_03286, score=4, range=27-48, str

target 5' CUUCAUAAAAAAAAUAUCAUUA 3'  
::: : ::::::::::::::::::::  
query 3' GAACGAGAAGAAAUAUAGUAAU 5'  
query=novel\_mir\_178, target=R03G\_06767, score=4, range=2598-2618,  
strand=-1  
target 5' CUUGCUCUUCUUUG-AUCAUUC 3'  
::::::::::::. :::::  
query 3' GAACGAGAAGAAAUAUAGUAAU 5'  
query=novel\_mir\_178, target=R03G\_04354, score=4, range=99-119,  
strand=-1  
target 5' CUGGCU-UUCCUUAUAUCAUUA 3'  
:: ::: ::: :::::::::::::  
query 3' GAACGAGAAGAAAUAUAGUAAU 5'  
query=novel\_mir\_188, target=R03G\_05047, score=3.5, range=93-112,  
strand=1  
target 5' UUGUUAUAGGAAAUGGCGCA 3'  
.::::: :  
query 3' GAUGAUAUCCUUUACCGCAU 5'  
query=novel\_mir\_188, target=R03G\_04506, score=3.5, range=414-433,  
strand=1  
target 5' UUGUUAUAGGAAAUGGCGCA 3'  
.::::: :  
query 3' GAUGAUAUCCUUUACCGCAU 5'  
query=novel\_mir\_188, target=R03G\_02274, score=4, range=2508-2526,  
strand=1  
target 5' UUAUU-UAGGAAAUGGCGCA 3'  
.:::: : : : : : : : : : :  
query 3' GAUGAUAUCCUUUACCGCAU 5'  
query=novel\_mir\_205, target=R03G\_01945, score=1, range=179-200,  
strand=-1  
target 5' AUCCAUUGAAGUUGUAGCUCAA 3'  
::::::::::::: :  
query 3' UAGGUAACUUCAACGUCGAGUU 5'  
query=novel\_mir\_205, target=R03G\_13280, score=1, range=179-200,  
strand=-1  
target 5' AUCCAUUGAAGUUGUAGCUCAA 3'  
::::::::::::: :  
query 3' UAGGUAACUUCAACGUCGAGUU 5'  
query=novel\_mir\_205, target=R03G\_07703, score=1, range=179-200,  
strand=-1  
target 5' AUCAAUUGAAGUUGCAGCUCAA 3'  
::: : : : : : : : : : :  
query 3' UAGGUAACUUCAACGUCGAGUU 5'  
query=novel\_mir\_205, target=R03G\_17364, score=2, range=179-200,  
strand=-1



target 5' AUCAAUUGAAGUUGAAGCUCAG 3'  
::: ::::::::::: ::::::::::.  
query 3' UAGGUAACUUCAACGUCGAGUU 5'  
query=novel\_mir\_205, target=R03G\_00240, score=3.5, range=785-806,  
strand=1  
target 5' AUCAAUUGAAGUUGAAGCUCAG 3'  
::: ::::::::::: ::::::::::.  
query 3' UAGGUAACUUCAACGUCGAGUU 5'  
query=novel\_mir\_205, target=R03G\_02227, score=3.5, range=842-863,  
strand=1  
target 5' AUCAAUUGAAGUUGAAGCUCAG 3'  
::: ::::::::::: ::::::::::.  
query 3' UAGGUAACUUCAACGUCGAGUU 5'  
query=novel\_mir\_205, target=R03G\_14784, score=3.5, range=476-497,  
strand=1  
target 5' AUCAAUUGAAGUUGAAGCUCAG 3'  
::: ::::::::::: ::::::::::.  
query 3' UAGGUAACUUCAACGUCGAGUU 5'  
query=novel\_mir\_205, target=R03G\_16737, score=3.5, range=476-497,  
strand=1  
target 5' AUCAAUUGAAGUUGAAGCUCAG 3'  
::: ::::::::::: ::::::::::.  
query 3' UAGGUAACUUCAACGUCGAGUU 5'  
query=novel\_mir\_205, target=R03G\_17423, score=3.5, range=476-497,  
strand=1  
target 5' AUCAAUUGAAGUUGAAGCUCAG 3'  
::: ::::::::::: ::::::::::.  
query 3' UAGGUAACUUCAACGUCGAGUU 5'  
query=novel\_mir\_205, target=R03G\_03560, score=3.5, range=476-497,  
strand=1  
target 5' AUCAAUUGAAGUUGAAGCUCAG 3'  
::: ::::::::::: ::::::::::.  
query 3' UAGGUAACUUCAACGUCGAGUU 5'  
query=novel\_mir\_205, target=R03G\_16141, score=3.5, range=476-497,  
strand=1  
target 5' AUCAAUUGAAGUUGAAGCUCAG 3'  
::: ::::::::::: ::::::::::.  
query 3' UAGGUAACUUCAACGUCGAGUU 5'  
query=novel\_mir\_205, target=R03G\_07723, score=3.5, range=476-497,  
strand=1  
target 5' AUCAAUUGAAGUUGAAGCUCAG 3'  
::: ::::::::::: ::::::::::.  
query 3' UAGGUAACUUCAACGUCGAGUU 5'  
query=novel\_mir\_205, target=R03G\_16541, score=3.5, range=476-497,  
strand=1

target 5' AUCAAUUGAAGUUGAAGCUCAG 3'  
::: ::::::::::: ::::::::::.  
query 3' UAGGUAACUUCAACGUCGAGUU 5'  
query=novel\_mir\_205, target=R03G\_01725, score=3.5, range=476-497,  
strand=1  
target 5' AUCAAUUGAAGUUGAAGCUCAG 3'  
::: ::::::::::: ::::::::::.  
query 3' UAGGUAACUUCAACGUCGAGUU 5'  
query=novel\_mir\_205, target=R03G\_12950, score=3.5, range=476-497,  
strand=1  
target 5' AUCAAUUGAAGUUGAAGCUCAG 3'  
::: ::::::::::: ::::::::::.  
query 3' UAGGUAACUUCAACGUCGAGUU 5'  
query=novel\_mir\_205, target=R03G\_13752, score=3.5, range=476-497,  
strand=1  
target 5' AUCAAUUGAAGUUGAAGCUCAG 3'  
::: ::::::::::: ::::::::::.  
query 3' UAGGUAACUUCAACGUCGAGUU 5'  
query=novel\_mir\_205, target=R03G\_03791, score=3.5, range=476-497,  
strand=1  
target 5' AUCAAUUGAAGUUGAAGCUCAG 3'  
::: ::::::::::: ::::::::::.  
query 3' UAGGUAACUUCAACGUCGAGUU 5'  
query=novel\_mir\_205, target=R03G\_14981, score=3.5, range=476-497,  
strand=1  
target 5' AUCAAUUGAAGUUGAAGCUCAG 3'  
::: ::::::::::: ::::::::::.  
query 3' UAGGUAACUUCAACGUCGAGUU 5'  
query=novel\_mir\_205, target=R03G\_15286, score=3.5, range=476-497,  
strand=1  
target 5' AUCAAUUGAAGUUGAAGCUCAG 3'  
::: ::::::::::: ::::::::::.  
query 3' UAGGUAACUUCAACGUCGAGUU 5'  
query=novel\_mir\_205, target=R03G\_17328, score=3.5, range=476-497,  
strand=1  
target 5' AUCAAUUGAAGUUGAAGCUCAG 3'  
::: ::::::::::: ::::::::::.  
query 3' UAGGUAACUUCAACGUCGAGUU 5'  
query=novel\_mir\_205, target=R03G\_15170, score=3.5, range=476-497,  
strand=1  
target 5' AUCAAUUGAAGUUGAAGCUCAG 3'  
::: ::::::::::: ::::::::::.  
query 3' UAGGUAACUUCAACGUCGAGUU 5'  
query=novel\_mir\_205, target=R03G\_11536, score=3.5, range=476-497,  
strand=1

target 5' AUCAAUUGAAGUUGAAGCUCAG 3'  
::: ::::::::::: ::::::.  
query 3' UAGGUAACUUCAACGUCGAGUU 5'  
query=novel\_mir\_205, target=R03G\_17092, score=3.5, range=476-497,  
strand=1  
target 5' AUCAAUUGAAGUUGAAGCUCAG 3'  
::: ::::::::::: ::::::.  
query 3' UAGGUAACUUCAACGUCGAGUU 5'  
query=novel\_mir\_205, target=R03G\_09926, score=3.5, range=476-497,  
strand=1  
target 5' AUCAAUUGAAGUUGAAGCUCAG 3'  
::: ::::::::::: ::::::.  
query 3' UAGGUAACUUCAACGUCGAGUU 5'  
query=novel\_mir\_205, target=R03G\_10050, score=3.5, range=476-497,  
strand=1  
target 5' AUCAAUUGAAGUUGAAGCUCAG 3'  
::: ::::::::::: ::::::.  
query 3' UAGGUAACUUCAACGUCGAGUU 5'  
query=novel\_mir\_205, target=R03G\_05516, score=3.5, range=476-497,  
strand=1  
target 5' AUCAAUUGAAGUUGAAGCUCAG 3'  
::: ::::::::::: ::::::.  
query 3' UAGGUAACUUCAACGUCGAGUU 5'  
query=novel\_mir\_205, target=R03G\_10087, score=3.5, range=183-204,  
strand=1  
target 5' AUUGAUUCAGGUUGCAGCUCAA 3'  
::: ::::::::::: ::::::.  
query 3' UAGGUAACUUCAACGUCGAGUU 5'  
query=novel\_mir\_205, target=R03G\_10785, score=3.5, range=429-450,  
strand=1  
target 5' AUCAAUUGAAGUUGAAGCUCAG 3'  
::: ::::::::::: ::::::.  
query 3' UAGGUAACUUCAACGUCGAGUU 5'  
query=novel\_mir\_205, target=R03G\_00250, score=3.5, range=429-450,  
strand=1  
target 5' AUCAAUUGAAGUUGAAGCUCAG 3'  
::: ::::::::::: ::::::.  
query 3' UAGGUAACUUCAACGUCGAGUU 5'  
query=novel\_mir\_205, target=R03G\_12084, score=3.5, range=429-450,  
strand=1  
target 5' AUCAAUUGAAGUUGAAGCUCAG 3'  
::: ::::::::::: ::::::.  
query 3' UAGGUAACUUCAACGUCGAGUU 5'  
query=novel\_mir\_205, target=R03G\_09918, score=4, range=72-93, str  
target 5' CACCAAUAAAGUUGCAGCUCAA 3'



```

::: : :::::::::::::::
query 3' UAGGUAACUUCAACGUCGAGUU 5'
query=novel_mir_205, target=R03G_06044, score=4, range=133-153,
strand=1
target 5' AUCC-UUCAAGUAGCAGCUCAA 3'
:::: :: :::: :::::::::::
query 3' UAGGUAACUUCAACGUCGAGUU 5'
query=novel_mir_202, target=R03G_07788, score=2, range=378-399,
strand=-1
target 5' UCCUUCGCCCAGCGAAGCCUA 3'
::::::::::: :::::::::::
query 3' AAGGAAGCGGGCCGCUUCGGAU 5'
query=novel_mir_202, target=R03G_11567, score=2, range=1281-1302,
strand=-1
target 5' UCCUUCGCCCAGCGAAGCCUA 3'
::::::::::: :::::::::::
query 3' AAGGAAGCGGGCCGCUUCGGAU 5'
query=novel_mir_202, target=R03G_14722, score=2, range=429-450,
strand=-1
target 5' UCCUUCGCCCAGCGAAGCCUA 3'
::::::::::: :::::::::::
query 3' AAGGAAGCGGGCCGCUUCGGAU 5'
query=novel_mir_202, target=R03G_05181, score=2, range=429-450,
strand=-1
target 5' UCCUUCGCCCAGCGAAGCCUA 3'
::::::::::: :::::::::::
query 3' AAGGAAGCGGGCCGCUUCGGAU 5'
query=novel_mir_202, target=R03G_13664, score=2, range=429-450,
strand=-1
target 5' UCCUUCGCCCAGCGAAGCCUA 3'
::::::::::: :::::::::::
query 3' AAGGAAGCGGGCCGCUUCGGAU 5'
query=novel_mir_202, target=R03G_02354, score=2, range=429-450,
strand=-1
target 5' UCCUUCGCCCAGCGAAGCCUA 3'
::::::::::: :::::::::::
query 3' AAGGAAGCGGGCCGCUUCGGAU 5'
query=novel_mir_202, target=R03G_13903, score=2, range=429-450,
strand=-1
target 5' UCCUUCGCCCAGCGAAGCCUA 3'
::::::::::: :::::::::::
query 3' AAGGAAGCGGGCCGCUUCGGAU 5'
query=novel_mir_202, target=R03G_05303, score=2, range=429-450,
strand=-1
target 5' UCCUUCGCCCAGCGAAGCCUA 3'

```

query 3' AAGGAAGCGGGCCGCUUCGGAU 5'  
query=novel\_mir\_202, target=R03G\_08906, score=2, range=429-450,  
strand=-1  
target 5' UCCUUCGCCCAGCGAAGCCUA 3'

query 3' AAGGAAGCGGGCCGCUUCGGAU 5'  
query=novel\_mir\_202, target=R03G\_05194, score=2, range=429-450,  
strand=-1  
target 5' UCCUUCGCCCAGCGAAGCCUA 3'

query 3' AAGGAAGCGGGCCGCUUCGGAU 5'  
query=novel\_mir\_202, target=R03G\_13672, score=2, range=429-450,  
strand=-1  
target 5' UCCUUCGCCCAGCGAAGCCUA 3'

query 3' AAGGAAGCGGGCCGCUUCGGAU 5'  
query=novel\_mir\_202, target=R03G\_09419, score=2, range=249-270,  
strand=-1  
target 5' UCCUUCGCCCAGCGAAGCCUA 3'

query 3' AAGGAAGCGGGCCGCUUCGGAU 5'  
query=novel\_mir\_202, target=R03G\_11486, score=2, range=201-222,  
strand=-1  
target 5' UCCUUCGCCCAGCGAAGCCUA 3'

query 3' AAGGAAGCGGGCCGCUUCGGAU 5'  
query=novel\_mir\_202, target=R03G\_08301, score=2, range=354-375,  
strand=-1  
target 5' UCCUUCGCCCAGCGAAGCCUA 3'

query 3' AAGGAAGCGGGCCGCUUCGGAU 5'  
query=novel\_mir\_202, target=R03G\_01528, score=2, range=156-177,  
strand=-1  
target 5' UCCUUCGCCCAGCGAAGCCUA 3'

query 3' AAGGAAGCGGGCCGCUUCGGAU 5'  
query=novel\_mir\_202, target=R03G\_09838, score=2, range=201-222,  
strand=-1  
target 5' UCCUUCGCCCAGCGAAGCCUA 3'

query 3' AAGGAAGCGGGCCGCUUCGGAU 5'  
query=novel\_mir\_202, target=R03G\_15496, score=2, range=72-93,  
strand=-1  
target 5' UCCUUCGCCCAGCGAAGCCUA 3'

query 3' AAGGAAGCGGGCCGCUUCGGAU 5'  
query=novel\_mir\_202, target=R03G\_16429, score=2, range=141-162,  
strand=-1  
target 5' UCCUUCGCCCAGCGAAGCCUA 3'  
query 3' AAGGAAGCGGGCCGCUUCGGAU 5'  
query=novel\_mir\_202, target=R03G\_04110, score=2.5, range=126-147,  
strand=-1  
target 5' UCCUUCGCCCAGCGAAGCCUG 3'  
query 3' AAGGAAGCGGGCCGCUUCGGAU 5'  
query=novel\_mir\_202, target=R03G\_04104, score=2.5, range=126-147,  
strand=-1  
target 5' UCCUUCGCCCAGCGAAGCCUG 3'  
query 3' AAGGAAGCGGGCCGCUUCGGAU 5'  
query=novel\_mir\_202, target=R03G\_14365, score=2.5, range=321-342,  
strand=-1  
target 5' UCCUUCGUCCAGCGAAGCCUA 3'  
query 3' AAGGAAGCGGGCCGCUUCGGAU 5'  
query=novel\_mir\_202, target=R03G\_07438, score=3.5, range=126-147,  
strand=-1  
target 5' UCCUUUGCCCAGUGAAGCCUA 3'  
query 3' AAGGAAGCGGGCCGCUUCGGAU 5'  
query=novel\_mir\_202, target=R03G\_07273, score=3.5, range=126-147,  
strand=-1  
target 5' UCCUUUGCCCAGUGAAGCCUA 3'  
query 3' AAGGAAGCGGGCCGCUUCGGAU 5'  
query=novel\_mir\_202, target=R03G\_09656, score=3.5, range=126-147,  
strand=-1  
target 5' CUUCUUCGCCCAGCGAAGCCUA 3'  
query 3' AAGGAAGCGGGCCGCUUCGGAU 5'  
query=novel\_mir\_202, target=R03G\_08649, score=3.5, range=156-177,  
strand=-1  
target 5' UCCUUCGUCCGUCGAAGCCUA 3'  
query 3' AAGGAAGCGGGCCGCUUCGGAU 5'  
query=novel\_mir\_202, target=R03G\_09821, score=3.5, range=126-147,  
strand=-1  
target 5' UCCUUCAUCCAGCGAAGCCUA 3'

```
:::::::::: .:: ::::::::::::::
query 3' AAGGAAGCGGGCCGCUUCGGAU 5'
query=novel_mir_202, target=R03G_01923, score=4, range=378-399,
strand=-1
target 5' UCCUUCGCCCAUCGAAGCCUA 3'
:::::::::: ::::::::::::::
query 3' AAGGAAGCGGGCCGCUUCGGAU 5'
query=novel_mir_202, target=R03G_02936, score=4, range=429-450,
strand=-1
target 5' UCCUUCGCCCAUCGAAGCCUA 3'
:::::::::: ::::::::::::::
query 3' AAGGAAGCGGGCCGCUUCGGAU 5'
query=novel_mir_202, target=R03G_05133, score=4, range=378-399,
strand=-1
target 5' UCCUUCGCCCAUCGAAGCCUA 3'
:::::::::: ::::::::::::::
query 3' AAGGAAGCGGGCCGCUUCGGAU 5'
query=novel_mir_202, target=R03G_02348, score=4, range=141-162,
strand=-1
target 5' UCCUUCACCCAGCGAGGCCUA 3'
:::::::::: :::: ::::::::::::::
query 3' AAGGAAGCGGGCCGCUUCGGAU 5'
query=novel_mir_195, target=R03G_11888, score=3, range=647-667,
strand=-1
target 5' CUCUUUGA-UGAAUGAUGUCUA 3'
: :::::: .::::::::::::::::::
query 3' GUGAAACUCGCUUACUACAGAU 5'
query=novel_mir_195, target=R03G_09004, score=4, range=644-664,
strand=-1
target 5' CA-UUGGAUUGAAUGAUGUCUA 3'
:: :: :: .::::::::::::::::::
query 3' GUGAAACUCGCUUACUACAGAU 5'
query=novel_mir_207, target=R03G_02835, score=3, range=679-700,
strand=-1
target 5' UUACACCAACUGCGUCACAGAU 3'
:::::::::: ::::::::::::::
query 3' AAUGUGGUUGACGCAGUGUCAU 5'
query=novel_mir_207, target=R03G_07109, score=3, range=679-700,
strand=-1
target 5' UUACACCAACUGCGUCACAGAU 3'
:::::::::: ::::::::::::::
query 3' AAUGUGGUUGACGCAGUGUCAU 5'
query=novel_mir_207, target=R03G_07672, score=3, range=679-700,
strand=-1
target 5' UUACACCAACUGCGUCACAGAU 3'
```

```
:::::::::::
query 3' AAUGUGGUUGACGCAGUGUCAU 5'
query=novel_mir_207, target=R03G_09934, score=3, range=679-700,
strand=-1
target 5' UUACACCAACUGCGUCACAGAU 3'
:::::::::::
query 3' AAUGUGGUUGACGCAGUGUCAU 5'
query=novel_mir_207, target=R03G_09197, score=3, range=679-700,
strand=-1
target 5' UUACACCAACUGCGUCACAGAU 3'
:::::::::::
query 3' AAUGUGGUUGACGCAGUGUCAU 5'
query=novel_mir_207, target=R03G_15283, score=3, range=679-700,
strand=-1
target 5' UUACACCAACUGCGUCACAGAU 3'
:::::::::::
query 3' AAUGUGGUUGACGCAGUGUCAU 5'
query=novel_mir_207, target=R03G_16387, score=4, range=121-142,
strand=1
target 5' UUACACCAACUGCGUCACAACA 3'
:::::::::::
query 3' AAUGUGGUUGACGCAGUGUCAU 5'
query=novel_mir_206, target=R03G_05919, score=0, range=1754-1775,
strand=1
target 5' UUGAUCUAGAGUAUAACAACGA 3'
:::::::::::
query 3' AACUAGAUCUCAUAUUGUUGCU 5'
query=novel_mir_177, target=R03G_00300, score=1, range=754-776,
strand=1
target 5' CAUGUCGUUUUUCCUUAUUAAA 3'
:::::::::::
query 3' AUACAGCAUAAAAGGAAUAAUUU 5'
query=novel_mir_177, target=R03G_10220, score=1, range=336-359,
strand=1
target 5' UAUUGUCGUUUUUCCUUAUUAAA 3'
:: :::::::::::::
query 3' AU-ACAGCAUAAAAGGAAUAAUUU 5'
query=novel_mir_177, target=R03G_00682, score=1.5, range=651-674,
strand=1
target 5' UGUUGUCGUUUUUCCUUAUUAAA 3'
:. :::::::::::::
query 3' AU-ACAGCAUAAAAGGAAUAAUUU 5'
query=novel_mir_148, target=R03G_13587, score=3, range=206-225,
strand=1
target 5' CACGCAAACACAAGAAAAAG 3'
```

::::: ::::::::::::::  
query 3' GUGUGUGUGUGUUUUUUUUU 5'  
query=novel\_mir\_148, target=R03G\_06366, score=3.5, range=247-266,  
strand=1  
target 5' CGCACACACACAGGAGAAAA 3'  
::::::::::::::::::  
query 3' GUGUGUGUGUGUUUUUUUUU 5'  
query=novel\_mir\_148, target=R03G\_05011, score=3.5, range=594-613,  
strand=1  
target 5' UACAUACACACAAAACAAAG 3'  
.:.:.:.:.:.:.:.:.:  
query 3' GUGUGUGUGUGUUUUUUUUU 5'  
query=novel\_mir\_148, target=R03G\_00615, score=3.5, range=174-193,  
strand=1  
target 5' CAUCGACACACAAAAGAAAA 3'  
:. :.:.:.:.:.:.:.:  
query 3' GUGUGUGUGUGUUUUUUUUU 5'  
query=novel\_mir\_148, target=R03G\_10257, score=4, range=328-347,  
strand=1  
target 5' CAUAUACAAACAAAAAAGA 3'  
::::: ::::::::::::::  
query 3' GUGUGUGUGUGUUUUUUUUU 5'  
query=novel\_mir\_148, target=R03G\_15565, score=4, range=61-80, str  
target 5' CAUAAAUACACGAAAAAGAA 3'  
.:.: :.:.:.:.:.:.:.:  
query 3' GUGUGUGUGUGUUUUUUUUU 5'  
query=novel\_mir\_148, target=R03G\_08316, score=4, range=408-427,  
strand=1  
target 5' CAAUACACACGAAAAAAGG 3'  
:. :.:.:.:.:.:.:.:  
query 3' GUGUGUGUGUGUUUUUUUUU 5'  
query=novel\_mir\_148, target=R03G\_07476, score=4, range=797-815,  
strand=1  
target 5' CAUAUA-GCACAAAAGAAAA 3'  
.:.:.: :.:.:.:.:.:.:.:  
query 3' GUGUGUGUGUGUUUUUUUUU 5'  
query=novel\_mir\_148, target=R03G\_15971, score=4, range=166-184,  
strand=1  
target 5' CAUGC-CACACAGAAAGAAA 3'  
.:.:.: :.:.:.:.:.:.:.:  
query 3' GUGUGUGUGUGUUUUUUUUU 5'  
query=novel\_mir\_148, target=R03G\_00403, score=4, range=155-175,  
strand=1  
target 5' GACGCUAUACACAAAAAAAAC 3'  
.:.: :.:.:.:.:.:.:.::

query 3' GUGUG-UGUGUGUUUUUUUUU 5'  
query=novel\_mir\_148, target=R03G\_04455, score=4, range=206-225,  
strand=1  
target 5' GUCUCACGCACAAAAA 3'  
: :::::::::::::::  
query 3' GUGUGUGUGUGUUUUUUUUU 5'  
query=novel\_mir\_148, target=R03G\_11808, score=4, range=483-502,  
strand=1  
target 5' CAUUUGGACACAAAAAAG 3'  
::: .. :::::::::::::::  
query 3' GUGUGUGUGUGUUUUUUUUU 5'  
query=novel\_mir\_148, target=R03G\_05448, score=4, range=117-135,  
strand=1  
target 5' CACA-ACACAUAAAAAGAAC 3'  
:::: :::::::::::::::  
query 3' GUGUGUGUGUGUUUUUUUUU 5'  
query=novel\_mir\_148, target=R03G\_06993, score=4, range=659-679,  
strand=1  
target 5' CACAAGAAACACAAAAAAGAA 3'  
::: : : :::::::::::::::  
query 3' GUG-UGUGUGUGUUUUUUUUU 5'  
query=novel\_mir\_148, target=R03G\_14409, score=4, range=208-226,  
strand=1  
target 5' CA-ACAAACACAAAAGAAAC 3'  
:: :: :::::::::::::::  
query 3' GUGUGUGUGUGUUUUUUUUU 5'  
query=novel\_mir\_148, target=R03G\_04724, score=4, range=43-61, str  
target 5' CA-AAAGACACAAGAAAAA 3'  
:: : : :::::::::::::::  
query 3' GUGUGUGUGUGUUUUUUUUU 5'  
query=novel\_mir\_148, target=R03G\_09783, score=4, range=100-118,  
strand=1  
target 5' UACACA-ACACAAAAAUG 3'  
.::::: ::::::::::::::: .  
query 3' GUGUGUGUGUGUUUUUUUUU 5'  
query=novel\_mir\_148, target=R03G\_14016, score=4, range=759-778,  
strand=-1  
target 5' UAGACACACACAAAAGAGAG 3'  
. : ::::::::::::::: .  
query 3' GUGUGUGUGUGUUUUUUUUU 5'  
query=novel\_mir\_148, target=R03G\_06951, score=4, range=162-181,  
strand=-1  
target 5' CACACACACACAAUAAGAAU 3'  
::::::::::: :::::  
query 3' GUGUGUGUGUGUUUUUUUUU 5'

```

query=novel_mir_148, target=R03G_15456, score=4, range=735-754,
strand=-1
target 5' AACGAGCACACAAAAAAGA 3'
:: .:::::::::::
query 3' GUGUGUGUGUGUUUUUUUUU 5'
query=novel_mir_148, target=R03G_08765, score=4, range=180-199,
strand=-1
target 5' UCCAUACACACAAAAUAAAA 3'
. ::::::::::::: :::
query 3' GUGUGUGUGUGUUUUUUUUU 5'
query=novel_mir_148, target=R03G_14732, score=4, range=10-30,
strand=-1
target 5' UACCCAUAACUACAAAAA AAAA 3'
.: ::::: ::::::::::::
query 3' GUGUGUGUG-UGUUUUUUUUU 5'
query=novel_mir_157, target=R03G_01339, score=3, range=150-170,
strand=-1
target 5' ACACCUUUCGUUAGCACAUCA 3'
::::::::::: :
query 3' UGUGGAAAGUAAUCGUGUAUU 5'
query=novel_mir_157, target=R03G_02213, score=3.5, range=802-821,
strand=1
target 5' ACA-UUAUUAAUAGCACAUAA 3'
::: .: :::::::::::::
query 3' UGUGGAAAGUAAUCGUGUAUU 5'
query=novel_mir_157, target=R03G_00796, score=3.5, range=150-170,
strand=-1
target 5' ACACUUUUCGUUAGCACAUCA 3'
::::::::::: :
query 3' UGUGGAAAGUAAUCGUGUAUU 5'
query=novel_mir_157, target=R03G_14727, score=4, range=48-67, str
target 5' ACGUCGUUCAUU-GCACAUAA 3'
::::: ::::::: :::::::
query 3' UGUGGAAAGUAAUCGUGUAUU 5'
query=novel_mir_157, target=R03G_11148, score=4, range=448-468,
strand=-1
target 5' ACGUCUUUUAAUAGCAAUAA 3'
::::::::::: ::::::
query 3' UGUGGAAAGUAAUCGUGUAUU 5'
query=novel_mir_157, target=R03G_05866, score=4, range=407-426,
strand=-1
target 5' AGACAUUUCAUUAGCA-AUAA 3'
: :: ::::::::::::: ::::::
query 3' UGUGGAAAGUAAUCGUGUAUU 5'
query=novel_mir_131, target=R03G_13025, score=0, range=319-341,

```



strand=1  
target 5' AUGAACAAAGGCCAACGUUAUGA 3'  
:::::::::::::::::::::::::::  
query 3' UACUUGUUUCCGGUUGCAAUACU 5'  
query=novel\_mir\_131, target=R03G\_16607, score=0, range=319-341,  
strand=1  
target 5' AUGAACAAAGGCCAACGUUAUGA 3'  
:::::::::::::::::::::::::::  
query 3' UACUUGUUUCCGGUUGCAAUACU 5'  
query=novel\_mir\_131, target=R03G\_03548, score=0, range=319-341,  
strand=1  
target 5' AUGAACAAAGGCCAACGUUAUGA 3'  
:::::::::::::::::::::::::::  
query 3' UACUUGUUUCCGGUUGCAAUACU 5'  
query=novel\_mir\_131, target=R03G\_01046, score=0, range=316-338,  
strand=1  
target 5' AUGAACAAAGGCCAACGUUAUGA 3'  
:::::::::::::::::::::::::::  
query 3' UACUUGUUUCCGGUUGCAAUACU 5'  
query=novel\_mir\_131, target=R03G\_16503, score=1, range=55-77, str  
target 5' AUGAACAAAGGUCAACGUUAUGA 3'  
:::::::::::::::::::::::::::  
query 3' UACUUGUUUCCGGUUGCAAUACU 5'  
query=novel\_mir\_131, target=R03G\_03021, score=3.5, range=1912-193  
strand=1  
target 5' AUGAA-GGAUGCCAACGUUAUGG 3'  
::::: ..: :::::::::::::::  
query 3' UACUUGUUUCCGGUUGCAAUACU 5'  
query=novel\_mir\_131, target=R03G\_07972, score=4, range=1152-1175,  
strand=1  
target 5' AUGGAACAAAGGCCAUCGUUGUGA 3'  
:: ::::::::::::::: :::::::::::  
query 3' UA-CUUGUUUCCGGUUGCAAUACU 5'  
query=novel\_mir\_131, target=R03G\_07992, score=4, range=522-545,  
strand=1  
target 5' AUGGAACAAAGGCCAUCGUUGUGA 3'  
:: ::::::::::::::: :::::::::::  
query 3' UA-CUUGUUUCCGGUUGCAAUACU 5'  
query=novel\_mir\_131, target=R03G\_15026, score=4, range=458-479,  
strand=1  
target 5' AUCAAGAAAGG-CAACGUUAUGA 3'  
:: :: ::::::: :::::::::::::::  
query 3' UACUUGUUUCCGGUUGCAAUACU 5'  
query=novel\_mir\_209, target=R03G\_05351, score=4, range=206-225,  
strand=1







target 5' AGAUAUCCUGAUACUGGAAA 3'  
:::.....  
query 3' UCUGUAGGACUAUGACCUUU 5'  
query=novel\_mir\_172, target=R03G\_16259, score=0.5, range=742-761,  
strand=1  
target 5' AGGCAUCCUGAUACUGGAAA 3'  
:::.....  
query 3' UCUGUAGGACUAUGACCUUU 5'  
query=novel\_mir\_172, target=R03G\_01162, score=0.5, range=754-773,  
strand=1  
target 5' AGGCAUCCUGAUACUGGAAA 3'  
:::.....  
query 3' UCUGUAGGACUAUGACCUUU 5'  
query=novel\_mir\_172, target=R03G\_01148, score=0.5, range=754-773,  
strand=1  
target 5' AGGCAUCCUGAUACUGGAAA 3'  
:::.....  
query 3' UCUGUAGGACUAUGACCUUU 5'  
query=novel\_mir\_172, target=R03G\_09521, score=1, range=262-281,  
strand=1  
target 5' GGGCAUCCUGAUACUGGAAA 3'  
.:.....  
query 3' UCUGUAGGACUAUGACCUUU 5'  
query=novel\_mir\_172, target=R03G\_01395, score=1, range=277-296,  
strand=1  
target 5' AGGCAUUCUGAUACUGGAAA 3'  
:::.....  
query 3' UCUGUAGGACUAUGACCUUU 5'  
query=novel\_mir\_172, target=R03G\_12841, score=1.5, range=85-104,  
strand=1  
target 5' AGGUAUUCUGAUACUGGAAA 3'  
:::.....  
query 3' UCUGUAGGACUAUGACCUUU 5'  
query=novel\_mir\_172, target=R03G\_10183, score=4, range=1048-1067,  
strand=1  
target 5' GGAUAUAUUGAUUUGGAAA 3'  
.:::: .:.....  
query 3' UCUGUAGGACUAUGACCUUU 5'  
query=novel\_mir\_172, target=R03G\_14575, score=4, range=52-71, str  
target 5' AGAAGUCCGAUACUGGAAA 3'  
::: .: .: :.....  
query 3' UCUGUAGGACUAUGACCUUU 5'  
query=novel\_mir\_172, target=R03G\_14442, score=4, range=1849-1868,  
strand=1  
target 5' UUAAAUGCUGAUACUGGAAA 3'

```
: :: :::::::::::::::
query 3' UCUGUAGGACUAUGACCUUU 5'
query=novel_mir_172, target=R03G_11848, score=4, range=1141-1159,
strand=1
target 5' AGAGAUGCUGAUA-UGGAAA 3'
::: :: :::::::::: :::::::
query 3' UCUGUAGGACUAUGACCUUU 5'
query=novel_mir_172, target=R03G_17302, score=4, range=662-681,
strand=-1
target 5' AUACAUCUGGAUACUGGAAA 3'
: ::::: :::::::::::::::
query 3' UCUGUAGGACUAUGACCUUU 5'
query=novel_mir_172, target=R03G_13578, score=4, range=1132-1152,
strand=-1
target 5' AAGUAUCCUGAUUCUGGAAA 3'
: ..::::::::::::: :::::::
query 3' UCUGUAGGACUAU-GACCUUU 5'
query=novel_mir_165, target=R03G_01189, score=0.5, range=33-54,
strand=-1
target 5' UGUACCACGUACAUCUACACCG 3'
::::::::::::::::::::::::::.
query 3' ACAUGGUGCAUGUAGAUGUGGU 5'
query=novel_mir_165, target=R03G_10238, score=0.5, range=33-54,
strand=-1
target 5' UGUACCACGUACAUCUACACCG 3'
::::::::::::::::::::::::::.
query 3' ACAUGGUGCAUGUAGAUGUGGU 5'
query=novel_mir_165, target=R03G_10859, score=0.5, range=33-54,
strand=-1
target 5' UGUACCACGUACAUCUACACCG 3'
::::::::::::::::::::::::::.
query 3' ACAUGGUGCAUGUAGAUGUGGU 5'
query=novel_mir_165, target=R03G_14998, score=1, range=33-54,
strand=-1
target 5' AGUACCACGUACAUCUACACCA 3'
:::::::::::::::::::::::::::
query 3' ACAUGGUGCAUGUAGAUGUGGU 5'
query=novel_mir_165, target=R03G_09615, score=1, range=33-54,
strand=-1
target 5' AGUACCACGUACAUCUACACCA 3'
:::::::::::::::::::::::::::
query 3' ACAUGGUGCAUGUAGAUGUGGU 5'
query=novel_mir_165, target=R03G_01933, score=1, range=33-54,
strand=-1
target 5' UGUACCACAUACAUCUACACCA 3'
```

```
:::::::::: ::::::::::::::
query 3' ACAUGGUGCAUGUAGAUGUGGU 5'
query=novel_mir_165, target=R03G_01204, score=2, range=33-54,
strand=-1
target 5' UGUACCACGUACAUGUACACCA 3'
:::::::::: ::::::::::::::
query 3' ACAUGGUGCAUGUAGAUGUGGU 5'
query=novel_mir_165, target=R03G_09616, score=2, range=33-54,
strand=-1
target 5' CUUACCACGUACAUCUACACCA 3'
:::::::::: ::::::::::::::
query 3' ACAUGGUGCAUGUAGAUGUGGU 5'
query=novel_mir_165, target=R03G_17448, score=2.5, range=33-54,
strand=-1
target 5' CUUACCACGUACAUCUACACCG 3'
:::::::::: ::::::::::::::.
query 3' ACAUGGUGCAUGUAGAUGUGGU 5'
query=novel_mir_165, target=R03G_10239, score=2.5, range=33-54,
strand=-1
target 5' CUUACCACGUACAUCUACACCG 3'
:::::::::: ::::::::::::::.
query 3' ACAUGGUGCAUGUAGAUGUGGU 5'
query=novel_mir_165, target=R03G_09481, score=2.5, range=33-54,
strand=-1
target 5' CUUACCACGUACAUCUACACCG 3'
:::::::::: ::::::::::::::.
query 3' ACAUGGUGCAUGUAGAUGUGGU 5'
query=novel_mir_165, target=R03G_07034, score=4, range=33-54,
strand=-1
target 5' AGUACCACAAACAUCUACACCA 3'
:::::::::: ::::::::::::::
query 3' ACAUGGUGCAUGUAGAUGUGGU 5'
query=novel_mir_190, target=R03G_10761, score=3.5, range=267-286,
strand=-1
target 5' CUUCUU-UACAUGUCAAAUUA 3'
:::::::::: ::::::::::::::.
query 3' AAGGAAUAUGUACAGUUUAGU 5'
query=novel_mir_190, target=R03G_15611, score=4, range=24-43,
strand=-1
target 5' UUUCUUGUACAU-UUAAAUCA 3'
:::::::::: ::::::::::::::
query 3' AAGGAAUAUGUACAGUUUAGU 5'
query=novel_mir_184, target=R03G_12935, score=2.5, range=40-59,
strand=1
target 5' UACUAUGAAGAAAAGUCAAA 3'
```

```
.... :.....:
query 3' GUGGGAUUUCUUUUCAGUUU 5'
query=novel_mir_184, target=R03G_04685, score=3.5, range=1210-122
strand=1
target 5' AACCUAAAAGAGAAGUCAAU 3'
.....:
query 3' GUGGGAUUUCUUUUCAGUUU 5'
query=novel_mir_184, target=R03G_15916, score=3.5, range=1848-186
strand=1
target 5' UACUUUACAAGAAAAGUUAAA 3'
.....: :.....:
query 3' GUGGGAU-UUCUUUUCAGUUU 5'
query=novel_mir_184, target=R03G_08795, score=3.5, range=43-62,
strand=1
target 5' CACUCAAAAAGAAAAGUUAU 3'
.....: :.....:
query 3' GUGGGAUUUCUUUUCAGUUU 5'
query=novel_mir_184, target=R03G_10269, score=3.5, range=2512-253
strand=1
target 5' CGUCCUAAAAGAAAAG-CAAG 3'
.....: :.....:
query 3' GUGGGAUUUCUUUUCAGUUU 5'
query=novel_mir_184, target=R03G_03033, score=3.5, range=534-553,
strand=-1
target 5' CACCCAAAAGAGGAGUCAAG 3'
.....: :.....:
query 3' GUGGGAUUUCUUUUCAGUUU 5'
query=novel_mir_184, target=R03G_10619, score=3.5, range=534-553,
strand=-1
target 5' CACCCAAAAGAGGAGUCAAG 3'
.....: :.....:
query 3' GUGGGAUUUCUUUUCAGUUU 5'
query=novel_mir_184, target=R03G_04999, score=4, range=2001-2021,
strand=1
target 5' AAUGUCUAAAGAAGAGUCAAA 3'
.. :.....:
query 3' GUG-GGAUUUCUUUUCAGUUU 5'
query=novel_mir_184, target=R03G_07498, score=4, range=565-584,
strand=1
target 5' CGUGC UAAAGAAAAGGCAAA 3'
... :.....: :.....:
query 3' GUGGGAUUUCUUUUCAGUUU 5'
query=novel_mir_184, target=R03G_16176, score=4, range=741-760,
strand=1
target 5' UACUCCAAAAGAAACGUCAAA 3'
```



```
.:::: : : : : :
query 3' GUGGGAUUUCUUUUCAGUUU 5'
query=novel_mir_184, target=R03G_10923, score=4, range=1397-1417,
strand=1
target 5' CGUCCUUAAGAAACAGUCAA 3'
:..::: : : : : :
query 3' GUGGGAUUUCUUU-UCAGUUU 5'
query=novel_mir_184, target=R03G_13946, score=4, range=633-653,
strand=1
target 5' CACAUUGAAGAAAAGUAAAA 3'
::: . : : : : :
query 3' GUG-GGAUUUCUUUUCAGUUU 5'
query=novel_mir_184, target=R03G_08850, score=4, range=244-264,
strand=1
target 5' AACCGUCAAGAAAGGUCAA 3'
::: : : : : :
query 3' GUGGGA-UUUCUUUUCAGUUU 5'
query=novel_mir_184, target=R03G_12516, score=4, range=2729-2747,
strand=1
target 5' CGCCC-AAAGAAUUGUCAAG 3'
:::: : : : : :
query 3' GUGGGAUUUCUUUUCAGUUU 5'
query=novel_mir_184, target=R03G_07853, score=4, range=1754-1772,
strand=1
target 5' CGCCC-AAAGAAUUGUCAAG 3'
:::: : : : : :
query 3' GUGGGAUUUCUUUUCAGUUU 5'
query=novel_mir_184, target=R03G_07814, score=4, range=196-214,
strand=1
target 5' GAACCUAAAG-AAAGUCAA 3'
: : : : : :
query 3' GUGGGAUUUCUUUUCAGUUU 5'
query=novel_mir_184, target=R03G_00438, score=4, range=437-455,
strand=1
target 5' CAACC-AAAGAAACUCAAA 3'
:: : : : : :
query 3' GUGGGAUUUCUUUUCAGUUU 5'
query=novel_mir_184, target=R03G_09067, score=4, range=1438-1458,
strand=1
target 5' AACCUUAGAGACAAAGUCAA 3'
::::: : : : : :
query 3' GUGGGAUUUCU-UUUCAGUUU 5'
query=novel_mir_149, target=R03G_03696, score=0, range=13-32, str
target 5' AGCAACCAGCAAAGCAUCGA 3'
::::: : : : : :
```

query 3' UCGUUGGUCGUUUCGUAGCU 5'  
query=novel\_mir\_149, target=R03G\_11598, score=3, range=683-702,  
strand=-1  
target 5' AUCAAGCAGCAAAGCAUCGC 3'  
: ::: :::::::::::::::  
query 3' UCGUUGGUCGUUUCGUAGCU 5'  
query=novel\_mir\_149, target=R03G\_00772, score=3.5, range=1710-172  
strand=1  
target 5' CGCUGCCAGUAAAGCAUCGA 3'  
:: .::::: :::::::::::::::  
query 3' UCGUUGGUCGUUUCGUAGCU 5'  
query=novel\_mir\_149, target=R03G\_01424, score=3.5, range=378-398,  
strand=1  
target 5' GCUGACCAAGCAAAGCAUCGA 3'  
. .::::: :::::::::::::::  
query 3' UCGUUGG-UCGUUUCGUAGCU 5'  
query=novel\_mir\_149, target=R03G\_12405, score=3.5, range=1223-124  
strand=-1  
target 5' AACAAUCUAGCAAACAUCGA 3'  
: ::::::::::: ::::::::::  
query 3' UCGUUGGUCGUUUCGUAGCU 5'  
query=novel\_mir\_149, target=R03G\_04203, score=4, range=134-153,  
strand=1  
target 5' UGCAACCAGCAAACUAUCGA 3'  
: ::::::::::: ::::::::::  
query 3' UCGUUGGUCGUUUCGUAGCU 5'  
query=novel\_mir\_149, target=R03G\_13221, score=4, range=1190-1209,  
strand=1  
target 5' UGCAACCAGCAAACUAUCGA 3'  
: ::::::::::: ::::::::::  
query 3' UCGUUGGUCGUUUCGUAGCU 5'  
query=novel\_mir\_149, target=R03G\_13224, score=4, range=1190-1209,  
strand=1  
target 5' UGCAACCAGCAAACUAUCGA 3'  
: ::::::::::: ::::::::::  
query 3' UCGUUGGUCGUUUCGUAGCU 5'  
query=novel\_mir\_149, target=R03G\_04123, score=4, range=1190-1209,  
strand=1  
target 5' UGCAACCAGCAAACUAUCGA 3'  
: ::::::::::: ::::::::::  
query 3' UCGUUGGUCGUUUCGUAGCU 5'  
query=novel\_mir\_149, target=R03G\_04120, score=4, range=1190-1209,  
strand=1  
target 5' UGCAACCAGCAAACUAUCGA 3'  
: ::::::::::: ::::::::::

```

query 3' UCGUUGGUCGUUUCGUAGCU 5'
query=novel_mir_149, target=R03G_07373, score=4, range=1140-1158,
strand=1
target 5' AG-AAUUAGCAAAGCAUUGC 3'
:: .....:
query 3' UCGUUGGUCGUUUCGUAGCU 5'
query=novel_mir_149, target=R03G_04495, score=4, range=29-47, str
target 5' AGCAACCAGCAAUC-UCGA 3'
:::::::::: : :::
query 3' UCGUUGGUCGUUUCGUAGCU 5'
query=novel_mir_149, target=R03G_12162, score=4, range=391-410,
strand=1
target 5' AGAAAAAGCAAAGCAUUGA 3'
:: :: :.....:
query 3' UCGUUGGUCGUUUCGUAGCU 5'
query=novel_mir_149, target=R03G_11979, score=4, range=2298-2317,
strand=-1
target 5' AGGAACCAGGAAGGCAUCGA 3'
:: ::::: :.....:
query 3' UCGUUGGUCGUUUCGUAGCU 5'
query=novel_mir_149, target=R03G_12434, score=4, range=617-635,
strand=-1
target 5' GGC-AUCUGCAAAGCAUCGA 3'
.: :.: :.....:
query 3' UCGUUGGUCGUUUCGUAGCU 5'
query=novel_mir_149, target=R03G_16001, score=4, range=362-381,
strand=-1
target 5' UUCAUCAAGCAAAGCAUCGA 3'
:: : :.....:
query 3' UCGUUGGUCGUUUCGUAGCU 5'
query=novel_mir_149, target=R03G_00361, score=4, range=943-961,
strand=-1
target 5' AGCCACCA-CGAAGCAUCGA 3'
::: :::: :.....:
query 3' UCGUUGGUCGUUUCGUAGCU 5'
query=novel_mir_133, target=R03G_13853, score=1, range=3746-3767,
strand=1
target 5' CCAGUAUAGCUCUGUCAGUUUA 3'
:::::::::::
query 3' GGUCAUAUCGAGAUAGUCAAAU 5'
query=novel_mir_133, target=R03G_07868, score=1, range=519-540,
strand=1
target 5' CCAGUAUAGCUCUGUCAGUUUA 3'
:::::::::::
query 3' GGUCAUAUCGAGAUAGUCAAAU 5'

```

```

query=novel_mir_133, target=R03G_05266, score=1, range=12-33,
strand=-1
target 5' CCAGUAUAGCUCUGUCAGUUUA 3'
: : : : : : : : : : : : : : : : : : : : : : : : : : : : : : : : : : : : : : : : : : : : : : :
query 3' GGUCAUAUCGAGAUAGUCAAAU 5'
query=novel_mir_133, target=R03G_00237, score=1, range=12-33,
strand=-1
target 5' CCAGUAUAGCUCUGUCAGUUUA 3'
: : : : : : : : : : : : : : : : : : : : : : : : : : : : : : : : : : : : : : : : :
query 3' GGUCAUAUCGAGAUAGUCAAAU 5'
query=novel_mir_133, target=R03G_03114, score=1.5, range=531-552,
strand=1
target 5' UCAGUAUAGCUCUGUCAGUUUA 3'
. : : : : : : : : : : : : : : : : : : : : : : : : : : : : : : : : : : : : : : : :
query 3' GGUCAUAUCGAGAUAGUCAAAU 5'
query=novel_mir_133, target=R03G_12653, score=2, range=303-324,
strand=1
target 5' CAAGUAUAGCUCUGUCAGUUUA 3'
: : : : : : : : : : : : : : : : : : : : : : : : : : : : : : : : : : : : : : : : :
query 3' GGUCAUAUCGAGAUAGUCAAAU 5'
query=novel_mir_133, target=R03G_06415, score=2, range=429-450,
strand=1
target 5' CAAGUAUAGCUCUGUCAGUUUA 3'
: : : : : : : : : : : : : : : : : : : : : : : : : : : : : : : : : : : : : : : : :
query 3' GGUCAUAUCGAGAUAGUCAAAU 5'
query=novel_mir_133, target=R03G_17276, score=2, range=12-33,
strand=-1
target 5' CAAGUAUAGCUCUGUCAGUUUA 3'
: : : : : : : : : : : : : : : : : : : : : : : : : : : : : : : : : : : : : : : : :
query 3' GGUCAUAUCGAGAUAGUCAAAU 5'
query=novel_mir_133, target=R03G_16475, score=2, range=183-204,
strand=-1
target 5' CCAGUUCAGCUCUAUCAGUUUA 3'
: : : : : : : : : : : : : : : : : : : : : : : : : : : : : : : : : : : : : : : : :
query 3' GGUCAUAUCGAGAUAGUCAAAU 5'
query=novel_mir_133, target=R03G_17019, score=3, range=66-87, str
target 5' CCAGUAUAGCUCGUCAGUUUA 3'
: : : : : : : : : : : : : : : : : : : : : : : : : : : : : : : : : : : : : : : : :
query 3' GGUCAUAUCGAGAUAGUCAAAU 5'
query=novel_mir_133, target=R03G_12911, score=4, range=153-174,
strand=-1
target 5' CCAGUAUAGUCCUGUCAGUUUA 3'
: : : : : : : : : : : : : : : : : : : : : : : : : : : : : : : : : : : : : : : : :
query 3' GGUCAUAUCGAGAUAGUCAAAU 5'
query=novel_mir_163, target=R03G_07525, score=0, range=1133-1154,

```

```

strand=1
target 5' CCAUGCUGUCUCCCGUUUCAA 3'
::::::::::::::::::::::::::
query 3' GGUACGACAGAGGGCAAAGUU 5'
query=novel_mir_163, target=R03G_06488, score=3.5, range=1133-115
strand=1
target 5' CCAUGUUAUCCCCCGUUUCAA 3'
::::: : : ::::::::::::::
query 3' GGUACGACAGAGGGCAAAGUU 5'
query=novel_mir_180, target=R03G_00051, score=3.5, range=1272-129
strand=1
target 5' AGGAUUUAACCAGCCUU-UAG 3'
: .:::::::::::::::::: : : :
query 3' UAUUAAAUUGGUCGGAACAUC 5'
query=novel_mir_180, target=R03G_13827, score=4, range=276-296,
strand=-1
target 5' AUAUAUAACCCGUCUUGUAG 3'
::::: : : : : : : : : : : :
query 3' UAUUAAAUUGGUCGGAACAUC 5'
query=novel_mir_180, target=R03G_07346, score=4, range=51-71,
strand=-1
target 5' AUUACUUCAUCAGCCUUGUAG 3'
:: : : : : : : : : : : :
query 3' UAUUAAAUUGGUCGGAACAUC 5'
query=novel_mir_198, target=R03G_14663, score=3.5, range=768-787,
strand=1
target 5' UCCCUUACUCCCUCUCCCG 3'
.::::: : : : : : : : : .
query 3' GGGGGAGGAGGGGAGAGGGU 5'
query=novel_mir_198, target=R03G_08433, score=4, range=675-694,
strand=1
target 5' UCCCAUCCUCCCUUCUCCUG 3'
.:::: : : : : : : : : .
query 3' GGGGGAGGAGGGGAGAGGGU 5'
query=novel_mir_198, target=R03G_03107, score=4, range=1536-1556,
strand=1
target 5' CCCUCUCUCUCUCCUCUCCUG 3'
::::: : : : : : : : .
query 3' GGGGGAG-GAGGGGAGAGGGU 5'
query=novel_mir_198, target=R03G_12925, score=4, range=535-555,
strand=1
target 5' CCCCUCUCCUCCUCCCCCA 3'
:::::::::::: : : : : :
query 3' GGGGGAGGAGG-GGAGAGGGU 5'
query=novel_mir_198, target=R03G_10142, score=4, range=1536-1554,

```

strand=1  
target 5' CCCUCU-CUCUCCUCUCCUG 3'  
::::: ::::::::::::::  
query 3' GGGGGAGGAGGGGAGAGGGU 5'  
query=novel\_mir\_198, target=R03G\_01595, score=4, range=714-733,  
strand=-1  
target 5' UCCCCUUCUCCCCUUCUCU 3'  
.:.:.:.:.:.:.:.:.:.:  
query 3' GGGGGAGGAGGGGAGAGGGU 5'  
query=novel\_mir\_130, target=R03G\_05020, score=4, range=478-499,  
strand=-1  
target 5' AUGAUGUAGGCCAGUCAAAUAA 3'  
:: ..: :::::::::::::::  
query 3' AACAGUAACCGGUCAGUUUAUU 5'  
query=novel\_mir\_196, target=R03G\_08911, score=4, range=140-161,  
strand=-1  
target 5' UCUU-UUGCCAAGGGUAUAUCAA 3'  
::::: ::::: ::::: : :::::  
query 3' AGAACAACGAUUCCCAGAUAGUU 5'  
query=novel\_mir\_194, target=R03G\_05855, score=4, range=1860-1883,  
strand=1  
target 5' GUCAAACUAUGCAGUGCCUCACAA 3'  
.::: ::: :::::::::::::::  
query 3' UAG-AUGUUAUGUCACGGAGUGUU 5'  
query=novel\_mir\_139, target=R03G\_15168, score=1, range=568-590,  
strand=-1  
target 5' UUAGGUGGCCAAUCGUUAAUGUA 3'  
.:.:.:.:.:.:.:.:.:.:  
query 3' AAUCCACCGGUUAGCAAUUUAU 5'  
query=novel\_mir\_139, target=R03G\_03573, score=3, range=784-806,  
strand=-1  
target 5' UUAGGUGGCCAAUCGUUAAUGUA 3'  
.:.:.:.:.:.:.:.:.:.:  
query 3' AAUCCACCGGUUAGCAAUUUAU 5'  
query=novel\_mir\_139, target=R03G\_17239, score=3, range=784-806,  
strand=-1  
target 5' UUAGGUGGCCAAUCGUUAAUGUA 3'  
.:.:.:.:.:.:.:.:.:.:  
query 3' AAUCCACCGGUUAGCAAUUUAU 5'  
query=novel\_mir\_139, target=R03G\_10749, score=3, range=31-53,  
strand=-1  
target 5' UUAGGUGGCCAAUCGUUAAUGUA 3'  
.:.:.:.:.:.:.:.:.:.:  
query 3' AAUCCACCGGUUAGCAAUUUAU 5'  
query=novel\_mir\_139, target=R03G\_10799, score=3.5, range=784-806,



strand=-1  
target 5' UGAGCUGGCCAAUCGCUAAUUAUA 3'  
: :: :::::::::::::: :::::::  
query 3' AAUCCACCGGUUAGCAAUUUAUAU 5'  
query=novel\_mir\_139, target=R03G\_16141, score=4, range=418-440,  
strand=-1  
target 5' UGAGCUGGCCAAUCGCUAAUUAUA 3'  
: :: :::::::::::::: :::::::  
query 3' AAUCCACCGGUUAGCAAUUUAUAU 5'  
query=novel\_mir\_139, target=R03G\_13752, score=4, range=418-440,  
strand=-1  
target 5' UGAGCUGGCCAAUCGCUAAUUAUA 3'  
: :: :::::::::::::: :::::::  
query 3' AAUCCACCGGUUAGCAAUUUAUAU 5'  
query=novel\_mir\_139, target=R03G\_03791, score=4, range=418-440,  
strand=-1  
target 5' UGAGCUGGCCAAUCGCUAAUUAUA 3'  
: :: :::::::::::::: :::::::  
query 3' AAUCCACCGGUUAGCAAUUUAUAU 5'  
query=novel\_mir\_139, target=R03G\_11536, score=4, range=418-440,  
strand=-1  
target 5' UGAGCUGGCCAAUCGCUAAUUAUA 3'  
: :: :::::::::::::: :::::::  
query 3' AAUCCACCGGUUAGCAAUUUAUAU 5'  
query=novel\_mir\_139, target=R03G\_17092, score=4, range=418-440,  
strand=-1  
target 5' UGAGCUGGCCAAUCGCUAAUUAUA 3'  
: :: :::::::::::::: :::::::  
query 3' AAUCCACCGGUUAGCAAUUUAUAU 5'  
query=novel\_mir\_139, target=R03G\_15145, score=4, range=418-440,  
strand=-1  
target 5' UGAGCUGGCCAAUCGCUAAUUAUA 3'  
: :: :::::::::::::: :::::::  
query 3' AAUCCACCGGUUAGCAAUUUAUAU 5'  
query=novel\_mir\_139, target=R03G\_10050, score=4, range=418-440,  
strand=-1  
target 5' UGAGCUGGCCAAUCGCUAAUUAUA 3'  
: :: :::::::::::::: :::::::  
query 3' AAUCCACCGGUUAGCAAUUUAUAU 5'  
query=novel\_mir\_139, target=R03G\_05516, score=4, range=418-440,  
strand=-1  
target 5' UGAGCUGGCCAAUCGCUAAUUAUA 3'  
: :: :::::::::::::: :::::::  
query 3' AAUCCACCGGUUAGCAAUUUAUAU 5'  
query=novel\_mir\_139, target=R03G\_15286, score=4, range=418-440,





strand=1  
target 5' ACCUUGCUCUCCCAAGCACCCA 3'  
:::::::::::::::::::::::::::  
query 3' UGGAACGAGAGGGUUCGUGGGU 5'  
query=novel\_mir\_191, target=R03G\_01161, score=0.5, range=205-226,  
strand=1  
target 5' ACCUUGCUIUCCCAAGCACCCA 3'  
:::::::::::::::::::::::::::  
query 3' UGGAACGAGAGGGUUCGUGGGU 5'  
query=novel\_mir\_191, target=R03G\_01147, score=0.5, range=205-226,  
strand=1  
target 5' ACCUUGCUIUCCCAAGCACCCA 3'  
:::::::::::::::::::::::::::  
query 3' UGGAACGAGAGGGUUCGUGGGU 5'  
query=novel\_mir\_191, target=R03G\_14109, score=1, range=58-79, str  
target 5' ACCUUCUCUCCCAAGCACCCA 3'  
::::: :::::::::::::::::::::  
query 3' UGGAACGAGAGGGUUCGUGGGU 5'  
query=novel\_mir\_191, target=R03G\_11276, score=1.5, range=244-265,  
strand=1  
target 5' AUCUUGCUCUCCCAAGCACCUA 3'  
:..:::::::::::::::::::  
query 3' UGGAACGAGAGGGUUCGUGGGU 5'  
query=novel\_mir\_191, target=R03G\_14594, score=3, range=10-31, str  
target 5' ACCUUCUUCUCAAGCACCCG 3'  
::::: :..:::::::::::::::::::  
query 3' UGGAACGAGAGGGUUCGUGGGU 5'  
query=novel\_mir\_191, target=R03G\_16763, score=4, range=10-31, str  
target 5' ACAUUCUUCUCAAGCACCCG 3'  
:: : :..:::::::::::::::::::  
query 3' UGGAACGAGAGGGUUCGUGGGU 5'  
query=novel\_mir\_146, target=R03G\_02321, score=0, range=2668-2689,  
strand=1  
target 5' UUGAUCGAGGCCUAUUGUGUCA 3'  
:::::::::::::::::::::::::::  
query 3' AACUAGCUCCGGAUAACACAGU 5'  
query=novel\_mir\_136, target=R03G\_01741, score=1, range=1376-1397,  
strand=-1  
target 5' UGACCAACAUAGCACAUUCAC 3'  
:::::::::::::::::::::::::::  
query 3' ACUGGUUGUAUCGUGUAUAGUU 5'  
query=novel\_mir\_136, target=R03G\_04023, score=1, range=884-905,  
strand=-1  
target 5' UGACCAACAUAGCACAUUCAC 3'  
:::::::::::::::::::::::::::

```
query 3' ACUGGUUGUAUCGUGUAUAGUU 5'
query=novel_mir_136, target=R03G_13822, score=3.5, range=1092-111
strand=1
target 5' UUAUCAACCGGCACAUAUCAA 3'
: :.: :.: :.: :.: :.: :.: :.: :.:
query 3' ACUGGUUGUAUCGUGUAUAGUU 5'
query=novel_mir_169, target=R03G_02227, score=1, range=2-23, str
target 5' UCCUCUGACAGCCGUUUAGGCA 3'
: :.: :.: :.: :.: :.: :.: :.:
query 3' AGGAGACUGUCGGCAAUUCGU 5'
query=novel_mir_169, target=R03G_06406, score=1, range=2-23, str
target 5' UCCUCUGACAGCCGUUUAGGCA 3'
: :.: :.: :.: :.: :.: :.: :.:
query 3' AGGAGACUGUCGGCAAUUCGU 5'
query=novel_mir_169, target=R03G_17352, score=1, range=2-23, str
target 5' UCCUCUGACAGCCGUUUAGGCA 3'
: :.: :.: :.: :.: :.: :.: :.:
query 3' AGGAGACUGUCGGCAAUUCGU 5'
query=novel_mir_169, target=R03G_16908, score=3, range=2-23, str
target 5' UCUUCUGGCAGUCGUUUAGGCA 3'
: :.: :.: :.: :.: :.: :.: :.:
query 3' AGGAGACUGUCGGCAAUUCGU 5'
query=novel_mir_169, target=R03G_07135, score=3, range=2-23, str
target 5' UCUUCUGGCAGUCGUUUAGGCA 3'
: :.: :.: :.: :.: :.: :.: :.:
query 3' AGGAGACUGUCGGCAAUUCGU 5'
query=novel_mir_169, target=R03G_05905, score=3, range=2-23, str
target 5' UCUUCUGGCAGUCGUUUAGGCA 3'
: :.: :.: :.: :.: :.: :.: :.:
query 3' AGGAGACUGUCGGCAAUUCGU 5'
query=novel_mir_169, target=R03G_06738, score=4, range=529-550,
strand=1
target 5' CCUUCUGGCAGUCGUUUAGGCA 3'
: :.: :.: :.: :.: :.: :.: :.:
query 3' AGGAGACUGUCGGCAAUUCGU 5'
query=novel_mir_169, target=R03G_05522, score=4, range=2-23, str
target 5' CCUUCUGGCAGUCGUUUAGGCA 3'
: :.: :.: :.: :.: :.: :.: :.:
query 3' AGGAGACUGUCGGCAAUUCGU 5'
query=novel_mir_169, target=R03G_03112, score=4, range=2-23, str
target 5' CCUUCUGGCAGUCGUUUAGGCA 3'
: :.: :.: :.: :.: :.: :.: :.:
query 3' AGGAGACUGUCGGCAAUUCGU 5'
query=novel_mir_169, target=R03G_00240, score=4, range=2-23, str
target 5' CCUUCUGGCAGUCGUUUAGGCA 3'
```





query=novel\_mir\_174, target=R03G\_03646, score=2.5, range=349-371,  
 strand=-1  
 target 5' UUUUCAAGAUCAAGUCCACUUUG 3'  
 :::::::::::::::::::::  
 query 3' AAAAGUUGUAGUUCAGGUGAAGU 5'  
 query=novel\_mir\_174, target=R03G\_05120, score=4, range=245-266,  
 strand=-1  
 target 5' UUAUAAACAUCAAGUCCA-UUCA 3'  
 :: : :::::::::::::::::::: :  
 query 3' AAAAGUUGUAGUUCAGGUGAAGU 5'  
 query=novel\_mir\_204, target=R03G\_07438, score=0.5, range=126-147,  
 strand=-1  
 target 5' UUCCUUUGCCCAGUGAAGCCUA 3'  
 :::::::::::::::::::::  
 query 3' AAGGAAGCGGGUCACUUCGGAU 5'  
 query=novel\_mir\_204, target=R03G\_07273, score=0.5, range=126-147,  
 strand=-1  
 target 5' UUCCUUUGCCCAGUGAAGCCUA 3'  
 :::::::::::::::::::::  
 query 3' AAGGAAGCGGGUCACUUCGGAU 5'  
 query=novel\_mir\_204, target=R03G\_09279, score=1.5, range=195-216,  
 strand=-1  
 target 5' UUCCUUUGCCCAGUGAGGCCUA 3'  
 :::::::::::::::::::::  
 query 3' AAGGAAGCGGGUCACUUCGGAU 5'  
 query=novel\_mir\_204, target=R03G\_07788, score=2, range=378-399,  
 strand=-1  
 target 5' UUCCUUCGCCCAGCGAAGCCUA 3'  
 :::::::::::::::::::: :  
 query 3' AAGGAAGCGGGUCACUUCGGAU 5'  
 query=novel\_mir\_204, target=R03G\_11567, score=2, range=1281-1302,  
 strand=-1  
 target 5' UUCCUUCGCCCAGCGAAGCCUA 3'  
 :::::::::::::::::::: :  
 query 3' AAGGAAGCGGGUCACUUCGGAU 5'  
 query=novel\_mir\_204, target=R03G\_14722, score=2, range=429-450,  
 strand=-1  
 target 5' UUCCUUCGCCCAGCGAAGCCUA 3'  
 :::::::::::::::::::: :  
 query 3' AAGGAAGCGGGUCACUUCGGAU 5'  
 query=novel\_mir\_204, target=R03G\_02354, score=2, range=429-450,  
 strand=-1  
 target 5' UUCCUUCGCCCAGCGAAGCCUA 3'  
 :::::::::::::::::::: :  
 query 3' AAGGAAGCGGGUCACUUCGGAU 5'



query=novel\_mir\_204, target=R03G\_08301, score=2, range=354-375,  
 strand=-1  
 target 5' UUCCUUCGCCCAGCGAAGCCUA 3'  
 :::::::::::::: ::::::::::  
 query 3' AAGGAAGCGGGUCACUUCGGAU 5'  
 query=novel\_mir\_204, target=R03G\_01528, score=2, range=156-177,  
 strand=-1  
 target 5' UUCCUUCGCCCAGCGAAGCCUA 3'  
 :::::::::::::: ::::::::::  
 query 3' AAGGAAGCGGGUCACUUCGGAU 5'  
 query=novel\_mir\_204, target=R03G\_09838, score=2, range=201-222,  
 strand=-1  
 target 5' UUCCUUCGCCCAGCGAAGCCUA 3'  
 :::::::::::::: ::::::::::  
 query 3' AAGGAAGCGGGUCACUUCGGAU 5'  
 query=novel\_mir\_204, target=R03G\_15496, score=2, range=72-93,  
 strand=-1  
 target 5' UUCCUUCGCCCAGCGAAGCCUA 3'  
 :::::::::::::: ::::::::::  
 query 3' AAGGAAGCGGGUCACUUCGGAU 5'  
 query=novel\_mir\_204, target=R03G\_16429, score=2, range=141-162,  
 strand=-1  
 target 5' UUCCUUCGCCCAGCGAAGCCUA 3'  
 :::::::::::::: ::::::::::  
 query 3' AAGGAAGCGGGUCACUUCGGAU 5'  
 query=novel\_mir\_204, target=R03G\_04104, score=2.5, range=126-147,  
 strand=-1  
 target 5' UUCCUUCGCCCAGCGAAGCCUG 3'  
 :::::::::::::: ::::::::::.  
 query 3' AAGGAAGCGGGUCACUUCGGAU 5'  
 query=novel\_mir\_204, target=R03G\_04110, score=2.5, range=126-147,  
 strand=-1  
 target 5' UUCCUUCGCCCAGCGAAGCCUG 3'  
 :::::::::::::: ::::::::::.  
 query 3' AAGGAAGCGGGUCACUUCGGAU 5'  
 query=novel\_mir\_204, target=R03G\_14365, score=2.5, range=321-342,  
 strand=-1  
 target 5' UUCCUUCGUCCAGCGAAGCCUA 3'  
 :::::::::::::: ::::::::::  
 query 3' AAGGAAGCGGGUCACUUCGGAU 5'  
 query=novel\_mir\_204, target=R03G\_02016, score=3.5, range=126-147,  
 strand=-1  
 target 5' CUCCUUCGCCCAGUGAAGCAUG 3'  
 :::::::::::::: ::.  
 query 3' AAGGAAGCGGGUCACUUCGGAU 5'







query=novel\_mir\_181, target=R03G\_04258, score=3, range=2328-2348,  
strand=1  
target 5' AAAUGCAAAGAAAUGCGCCA 3'  
:: :::::::::::::: :::::  
query 3' UUAACGUUUUCUUUUCGCGGU 5'  
query=novel\_mir\_181, target=R03G\_04176, score=3, range=291-310,  
strand=1  
target 5' AAUGGC-AAAGAAAGGCGCCA 3'  
::: :: :::::::::::::: :::::  
query 3' UUAACGUUUUCUUUUCGCGGU 5'  
query=novel\_mir\_181, target=R03G\_00164, score=3.5, range=1425-144  
strand=1  
target 5' UAUUGCAGAAGAAAUCGCCA 3'  
::::: :::::::::::::: :::::  
query 3' UUAACGUUUUCUUUUCGCGGU 5'  
query=novel\_mir\_181, target=R03G\_06134, score=3.5, range=744-764,  
strand=1  
target 5' AAUCGCAGAAGCAAAGCGCCA 3'  
::: ::::: :::::::::::::: :::::  
query 3' UUAACGUUUUCUUUUCGCGGU 5'  
query=novel\_mir\_181, target=R03G\_11121, score=3.5, range=408-428,  
strand=1  
target 5' AAUCGUAAAAGAAAAGCACCA 3'  
::: :::::::::::::: :::  
query 3' UUAACGUUUUCUUUUCGCGGU 5'  
query=novel\_mir\_181, target=R03G\_11760, score=3.5, range=1137-1115  
strand=1  
target 5' ACUUGC-AAAGAAAAGCGCUG 3'  
: :::: ::::::::::::::..  
query 3' UUAACGUUUUCUUUUCGCGGU 5'  
query=novel\_mir\_181, target=R03G\_16054, score=3.5, range=5730-575  
strand=-1  
target 5' AUUUGUAAAAGAAGGGCGCCA 3'  
: :::::::::::::::  
query 3' UUAACGUUUUCUUUUCGCGGU 5'  
query=novel\_mir\_181, target=R03G\_12248, score=4, range=1911-1931,  
strand=1  
target 5' GAACGCAGAAGAAAAGCGUCA 3'  
. : :::::::::::::::  
query 3' UUAACGUUUUCUUUUCGCGGU 5'  
query=novel\_mir\_181, target=R03G\_06918, score=4, range=15-35, str  
target 5' ACUUUCAAAGAAAAGGGCCA 3'  
: :: :::::::::::::: :::::  
query 3' UUAACGUUUUCUUUUCGCGGU 5'  
query=novel\_mir\_147, target=R03G\_00859, score=4, range=1156-1178,

```

strand=1
target 5' GUGCUUGCCUUGGAUCAAGCUCA 3'
:: :.:.:.:.:.:.:.:.:.:.: :.:.:.:.:.:.:.:.:.:.:
query 3' CA-GGAUGGAACCUAGAUCGAGU 5'
query=novel_mir_147, target=R03G_00794, score=4, range=1157-1178,
strand=1
target 5' GUCCUCCAUUAGAUCUAGCUCA 3'
.:.:.:.:.:.:.:.:.:.: :.:.:.:.:.:.:.:.:.:.:
query 3' CAGGAUGGAACCUAGAUCGAGU 5'
query=novel_mir_147, target=R03G_03719, score=4, range=1157-1178,
strand=1
target 5' GUCCUCCAUUAGAUCUAGCUCA 3'
.:.:.:.:.:.:.:.:.:.: :.:.:.:.:.:.:.:.:.:.:
query 3' CAGGAUGGAACCUAGAUCGAGU 5'
query=novel_mir_147, target=R03G_04202, score=4, range=291-311,
strand=1
target 5' CACCUA-CUUGGAUCUGGCUCA 3'
.:.:.: :.:.:.:.:.:.:.:.:.:.:
query 3' CAGGAUGGAACCUAGAUCGAGU 5'
query=novel_mir_162, target=R03G_06254, score=4, range=272-292,
strand=-1
target 5' GUGUUUUUCCAACUG-GUUUA 3'
.:.:.:.:.:.:.:.:.:.: :.:.:.:.:.:.:.:.:.:.:
query 3' CACAAAAGGGGUUGAUACAAAU 5'
query=novel_mir_187, target=R03G_08532, score=4, range=1688-1708,
strand=1
target 5' CCAC-GCCUCAAACUGCGUCA 3'
:: : :.:.:.:.:.:.:.:.:.:.:
query 3' GGAGUCGGAGGUUUGAUGCAGU 5'
query=novel_mir_187, target=R03G_03397, score=4, range=1333-1353,
strand=-1
target 5' CUUCAGUC-CCAAACUAUGUCC 3'
.:.:.:.:.: :.:.:.:.:.:.:.:.:.:.:
query 3' GGAGUCGGAGGUUUGAUGCAGU 5'
query=novel_mir_134, target=R03G_16836, score=4, range=235-255,
strand=1
target 5' GACAAU-UACCAAGUGCUUUA 3'
: :.:.:.: :.:.:.:.:.:.:.:.:.:.:
query 3' CAGUUAAUUUGGUUCACGAGAU 5'
query=novel_mir_134, target=R03G_11460, score=4, range=825-846,
strand=-1
target 5' AUGAAUAAAUCAAGUGCUUUA 3'
: :.:.:.:.:.:.:.:.:.:.:
query 3' CAGUUAAUUUGGUUCACGAGAU 5'
FGSC-9543 known miRNA target (PR)

```

#miRNA Score mRNA Pairing target and miRNA

>novel\_mir\_128 Score: 0.0 R03G\_17255

Query: 1 TGAGCACCGCACACTTCAGAGG 22

|||||

Sbjct: 1843 ACTCGTGGCGTGTGAAGTCTCC 1822

>novel\_mir\_128 Score: 0.0 R03G\_17156

Query: 1 TGAGCACCGCACACTTCAGAGG 22

|||||

Sbjct: 145 ACTCGTGGCGTGTGAAGTCTCC 124

>novel\_mir\_128 Score: 0.0 R03G\_13448

Query: 1 TGAGCACCGCACACTTCAGAGG 22

|||||

Sbjct: 1858 ACTCGTGGCGTGTGAAGTCTCC 1837

>novel\_mir\_128 Score: 0.0 R03G\_11979

Query: 1 TGAGCACCGCACACTTCAGAGG 22

|||||

Sbjct: 1846 ACTCGTGGCGTGTGAAGTCTCC 1825

>novel\_mir\_128 Score: 1.0 R03G\_10543

Query: 1 TGAGCACCGCACACTTCAGAGG 22

|||||\*|||||

Sbjct: 1345 ACTCGTGGCGTGTGAAATCTCC 1324

>novel\_mir\_128 Score: 1.0 R03G\_07735

Query: 1 TGAGCACCGCACACTTCAGAGG 22

|||||\*|||||

Sbjct: 1792 ACTCGTGGCGTGTGAAATCTCC 1771

>novel\_mir\_128 Score: 0.0 R03G\_01294

Query: 1 TGAGCACCGCACACTTCAGAGG 22

|||||

Sbjct: 961 ACTCGTGGCGTGTGAAGTCTCC 940

>novel\_mir\_33 Score: 2.5 R03G\_11197

Query: 1 GGAGGGATGGCCGAGTTGG-T 20

||||:|||||\*:\*|

Sbjct: 420 CCTCTTACCGGCTCCGCCTA 400

>novel\_mir\_79 Score: 0.0 R03G\_16804

Query: 1 TGACAATATGGGAGAACTGGCT 22

|||||

Sbjct: 357 ACTGTTATACCCTCTTGACCGA 336

>novel\_mir\_79 Score: 1.5 R03G\_15002

Query: 1 TGACAATATGGGAGAACTGGCT 22

||\*|||||\*|

Sbjct: 357 ACCGTTATACCCTCTTGACCTA 336

>novel\_mir\_79 Score: 0.0 R03G\_15131

Query: 1 TGACAATATGGGAGAACTGGCT 22

|||||

Sbjct: 357 ACTGTTATACCCTCTTGACCGA 336

>novel\_mir\_79 Score: 0.0 R03G\_13439  
Query: 1 TGACAATATGGGAGAACTGGCT 22  
|||||  
Sbjct: 357 ACTGTTATACCCTCTTGACCGA 336

>novel\_mir\_79 Score: 0.0 R03G\_13293  
Query: 1 TGACAATATGGGAGAACTGGCT 22  
|||||  
Sbjct: 357 ACTGTTATACCCTCTTGACCGA 336

>novel\_mir\_79 Score: 0.0 R03G\_12007  
Query: 1 TGACAATATGGGAGAACTGGCT 22  
|||||  
Sbjct: 357 ACTGTTATACCCTCTTGACCGA 336

>novel\_mir\_79 Score: 1.5 R03G\_12536  
Query: 1 TGACAATATGGGAGAACTGGCT 22  
||\*|||||\*|  
Sbjct: 357 ACCGTTATACCCTCTTGACCTA 336

>novel\_mir\_79 Score: 0.0 R03G\_10715  
Query: 1 TGACAATATGGGAGAACTGGCT 22  
|||||  
Sbjct: 357 ACTGTTATACCCTCTTGACCGA 336

>novel\_mir\_79 Score: 0.0 R03G\_09718  
Query: 1 TGACAATATGGGAGAACTGGCT 22  
|||||  
Sbjct: 357 ACTGTTATACCCTCTTGACCGA 336

>novel\_mir\_79 Score: 0.0 R03G\_10177  
Query: 1 TGACAATATGGGAGAACTGGCT 22  
|||||  
Sbjct: 357 ACTGTTATACCCTCTTGACCGA 336

>novel\_mir\_79 Score: 0.0 R03G\_09044  
Query: 1 TGACAATATGGGAGAACTGGCT 22  
|||||  
Sbjct: 219 ACTGTTATACCCTCTTGACCGA 198

>novel\_mir\_79 Score: 1.0 R03G\_04309  
Query: 1 TGACAATATGGGAGAACTGGCT 22  
|||||:|||||\*|  
Sbjct: 357 ACTGTTATGCCCTCTTGACCTA 336

>novel\_mir\_79 Score: 0.0 R03G\_03867  
Query: 1 TGACAATATGGGAGAACTGGCT 22  
|||||  
Sbjct: 357 ACTGTTATACCCTCTTGACCGA 336

>novel\_mir\_79 Score: 0.0 R03G\_01004  
Query: 1 TGACAATATGGGAGAACTGGCT 22  
|||||  
Sbjct: 357 ACTGTTATACCCTCTTGACCGA 336

>novel\_mir\_79 Score: 0.0 R03G\_01475

Query: 1 TGACAATATGGGAGAACTGGCT 22  
|||||  
Sbjct: 357 ACTGTTATACCCTCTTGACCGA 336  
>novel\_mir\_101 Score: 2.5 R03G\_13432  
Query: 1 TACCACAATGTCGAGACCATAAG 23  
\*|||||\*  
Sbjct: 268 TTGGTGTTACCCCTCTGGTATTC 246  
>novel\_mir\_101 Score: 0.0 R03G\_13001  
Query: 1 TACCACAATGTCGAGACCATAAG 23  
|||||  
Sbjct: 1156 ATGGTGTTACAGCTCTGGTATTC 1134  
>novel\_mir\_101 Score: 1.5 R03G\_09843  
Query: 1 TACCACAATGTCGAGACCA-TAAG 23  
:|||||\*:  
Sbjct: 391 GTGGTGTTACAGCTCTGGTCGTTA 368  
>novel\_mir\_101 Score: 0.0 R03G\_06596  
Query: 1 TACCACAATGTCGAGACCATAAG 23  
|||||  
Sbjct: 1156 ATGGTGTTACAGCTCTGGTATTC 1134  
>novel\_mir\_101 Score: 0.0 R03G\_03002  
Query: 1 TACCACAATGTCGAGACCATAAG 23  
|||||  
Sbjct: 1156 ATGGTGTTACAGCTCTGGTATTC 1134  
>novel\_mir\_22 Score: 0.0 R03G\_02842  
Query: 1 TAGCGCCTATTTTCTTTCTCA 22  
|||||  
Sbjct: 23 ATCGCGGATAAAAGAAAGGAGT 2  
>novel\_mir\_22 Score: 0.0 R03G\_04116  
Query: 1 TAGCGCCTATTTTCTTTCTCA 22  
|||||  
Sbjct: 173 ATCGCGGATAAAAGAAAGGAGT 152  
>novel\_mir\_53 Score: 0.5 R03G\_13496  
Query: 1 TGCATCGGCTACGTTCTTTTCG 22  
|||||\*  
Sbjct: 187 ACGTAGCCGATGCAAGAAAAC 166  
>novel\_mir\_53 Score: 1.8 R03G\_12846  
Query: 1 TGCATCGGCTACGTTCTTTTCG 22  
|||||\*  
Sbjct: 495 ACGTAGCCGATGTTAGAAAAGT 474  
>novel\_mir\_53 Score: 1.5 R03G\_08099  
Query: 1 TGCATCGGCTACGTTCTTTTCG 22  
||||:|||||\*  
Sbjct: 1038 ACGTGGCCGATGCAAGAACAAC 1017  
>novel\_mir\_53 Score: 0.5 R03G\_01535  
Query: 1 TGCATCGGCTACGTTCTTTTCG 22

\*|||||  
Sbjct: 240 CCGTAGCCGATGCAAGAAAAGC 219  
>novel\_mir\_53 Score: 0.5 R03G\_01538  
Query: 1 TGCATCGGCTACGTTCTTTTCG 22  
\*|||||  
Sbjct: 240 CCGTAGCCGATGCAAGAAAAGC 219  
>novel\_mir\_31 Score: 0.0 R03G\_15584  
Query: 1 TGTTCTGGGTTTCATGCATAAAG 22  
|||||  
Sbjct: 599 ACAAGACCCAAGTACGTATTTTC 578  
>novel\_mir\_31 Score: 1.0 R03G\_12163  
Query: 1 TGTTCTGGGTTTCATGCATAAAG 22  
|||||\*|\*|  
Sbjct: 494 ACAAGACCCAAGTACGTTTTCTC 473  
>novel\_mir\_31 Score: 0.0 R03G\_11241  
Query: 1 TGTTCTGGGTTTCATGCATAAAG 22  
|||||  
Sbjct: 599 ACAAGACCCAAGTACGTATTTTC 578  
>novel\_mir\_31 Score: 0.0 R03G\_10863  
Query: 1 TGTTCTGGGTTTCATGCATAAAG 22  
|||||  
Sbjct: 599 ACAAGACCCAAGTACGTATTTTC 578  
>novel\_mir\_31 Score: 0.0 R03G\_09201  
Query: 1 TGTTCTGGGTTTCATGCATAAAG 22  
|||||  
Sbjct: 599 ACAAGACCCAAGTACGTATTTTC 578  
>novel\_mir\_31 Score: 1.8 R03G\_07972  
Query: 1 TGTTCTGGGTTTCATGCATAAAG 22  
|||||:||||:|:|\*|  
Sbjct: 605 ACAAGACCTAAGTATGTGTTAC 584  
>novel\_mir\_31 Score: 2.2 R03G\_04799  
Query: 1 TGTTCTGGGTTTCATGCATAAAG 22  
|||||\*|||||\*||||:  
Sbjct: 827 ACAAGAACCAAGTACATATTTT 806  
>novel\_mir\_31 Score: 0.0 R03G\_05269  
Query: 1 TGTTCTGGGTTTCATGCATAAAG 22  
|||||  
Sbjct: 599 ACAAGACCCAAGTACGTATTTTC 578  
>novel\_mir\_31 Score: 0.0 R03G\_17455  
Query: 1 TGTTCTGGGTTTCATGCATAAAG 22  
|||||  
Sbjct: 599 ACAAGACCCAAGTACGTATTTTC 578  
>novel\_mir\_119 Score: 2.0 R03G\_08537  
Query: 1 GGTCTTGTGGTGTAAATGGTTAAA 23  
|||||:|:||||:||||\*|



Sbjct: 406 CCAGAACACTATATTATCAATGT 384  
>novel\_mir\_37 Score: 2.0 R03G\_13485  
Query: 1 TGGGAACTCGGGCTTTGGTAGG 22  
:|||||\*|||||||:||||:  
Sbjct: 526 GCCCTTGTGCCCGAAATCATCT 505  
>novel\_mir\_37 Score: 1.0 R03G\_11834  
Query: 1 TGGGAACTCGGGCTTTGGTAGG 22  
|\*|||||||  
Sbjct: 493 AACCTTGAGCCCGAAACCATCC 472  
>novel\_mir\_37 Score: 0.0 R03G\_08300  
Query: 1 TGGGAACTCGGGCTTTGGTAGG 22  
|||||||  
Sbjct: 712 ACCCTTGAGCCCGAAACCATCC 691  
>novel\_mir\_37 Score: 0.0 R03G\_08905  
Query: 1 TGGGAACTCGGGCTTTGGTAGG 22  
|||||||  
Sbjct: 712 ACCCTTGAGCCCGAAACCATCC 691  
>novel\_mir\_37 Score: 2.2 R03G\_05620  
Query: 1 TGGGAACTCGGGCTTTGGTAGG 22  
:|||||\*|||||||:||||:  
Sbjct: 691 GCCCTTGTGCCCGAAATCATTT 670  
>novel\_mir\_37 Score: 0.0 R03G\_05951  
Query: 1 TGGGAACTCGGGCTTTGGTAGG 22  
|||||||  
Sbjct: 712 ACCCTTGAGCCCGAAACCATCC 691  
>novel\_mir\_37 Score: 0.0 R03G\_03720  
Query: 1 TGGGAACTCGGGCTTTGGTAGG 22  
|||||||  
Sbjct: 712 ACCCTTGAGCCCGAAACCATCC 691  
>novel\_mir\_37 Score: 2.0 R03G\_04029  
Query: 1 TGGGAACTCGGGCTTTGGTAGG 22  
:|||||\*|||||||:||||:  
Sbjct: 691 GCCCTTGTGCCCGAAATCATCT 670  
>novel\_mir\_37 Score: 0.0 R03G\_00795  
Query: 1 TGGGAACTCGGGCTTTGGTAGG 22  
|||||||  
Sbjct: 712 ACCCTTGAGCCCGAAACCATCC 691  
>novel\_mir\_37 Score: 0.0 R03G\_01150  
Query: 1 TGGGAACTCGGGCTTTGGTAGG 22  
|||||||  
Sbjct: 712 ACCCTTGAGCCCGAAACCATCC 691  
>novel\_mir\_37 Score: 0.0 R03G\_01159  
Query: 1 TGGGAACTCGGGCTTTGGTAGG 22  
|||||||  
Sbjct: 712 ACCCTTGAGCCCGAAACCATCC 691

>novel\_mir\_70 Score: 0.0 R03G\_16888  
Query: 1 TGGTGGGTTGAAAAGGCTTTGG 22  
|||||  
Sbjct: 1252 ACCACCCAACCTTTCCGAAACC 1231

>novel\_mir\_70 Score: 0.0 R03G\_16319  
Query: 1 TGGTGGGTTGAAAAGGCTTTGG 22  
|||||  
Sbjct: 1933 ACCACCCAACCTTTCCGAAACC 1912

>novel\_mir\_70 Score: 0.0 R03G\_12207  
Query: 1 TGGTGGGTTGAAAAGGCTTTGG 22  
|||||  
Sbjct: 1933 ACCACCCAACCTTTCCGAAACC 1912

>novel\_mir\_70 Score: 0.0 R03G\_08064  
Query: 1 TGGTGGGTTGAAAAGGCTTTGG 22  
|||||  
Sbjct: 844 ACCACCCAACCTTTCCGAAACC 823

>novel\_mir\_70 Score: 0.0 R03G\_07700  
Query: 1 TGGTGGGTTGAAAAGGCTTTGG 22  
|||||  
Sbjct: 1252 ACCACCCAACCTTTCCGAAACC 1231

>novel\_mir\_70 Score: 0.0 R03G\_02944  
Query: 1 TGGTGGGTTGAAAAGGCTTTGG 22  
|||||  
Sbjct: 1252 ACCACCCAACCTTTCCGAAACC 1231

>novel\_mir\_70 Score: 0.0 R03G\_00653  
Query: 1 TGGTGGGTTGAAAAGGCTTTGG 22  
|||||  
Sbjct: 1933 ACCACCCAACCTTTCCGAAACC 1912

>novel\_mir\_70 Score: 0.0 R03G\_01241  
Query: 1 TGGTGGGTTGAAAAGGCTTTGG 22  
|||||  
Sbjct: 508 ACCACCCAACCTTTCCGAAACC 487

>novel\_mir\_70 Score: 0.0 R03G\_01244  
Query: 1 TGGTGGGTTGAAAAGGCTTTGG 22  
|||||  
Sbjct: 115 ACCACCCAACCTTTCCGAAACC 94

>novel\_mir\_70 Score: 0.0 R03G\_17284  
Query: 1 TGGTGGGTTGAAAAGGCTTTGG 22  
|||||  
Sbjct: 112 ACCACCCAACCTTTCCGAAACC 91

>novel\_mir\_41 Score: 2.5 R03G\_15235  
Query: 1 TACTTGATAATTGACTGATG-TT 22  
|||||\*|||||\*||\*\*|  
Sbjct: 123 ATGAACTACTAACTGACGACTCA 101

>novel\_mir\_41 Score: 1.0 R03G\_08791

Query: 1 TACTTGATAATTGACTGATGTT 22  
| | | | | | | | | | | | | | | | | | | | \* | : : |  
Sbjct: 78 ATGAACTATTA ACTGACCATGA 57  
>novel\_mir\_41 Score: 2.5 R03G\_00481  
Query: 1 TACTTGATAATTGACTGATGTT 22  
\* | | | | | | | | | | | | | | | | \* : | | : | : |  
Sbjct: 653 CTGAACTATTA ACTAGCTGCGA 632  
>novel\_mir\_41 Score: 2.5 R03G\_01607  
Query: 1 TACTTGATAATTGACTGATGTT 22  
| | | | | | | : | | | : | | | | \* : : : :  
Sbjct: 525 ATGAACTGTTAGCTGAC-GTGG 505  
>novel\_mir\_116 Score: 2.5 R03G\_01815  
Query: 1 TTGTCCGACGGTCTCAGGTAATT 23  
: | | | | | | | | | : | \* | | | | | : \* | | | |  
Sbjct: 372 GACAGGCTGCTAAAGTCCG-TAA 351  
>novel\_mir\_108 Score: 1.0 R03G\_09361  
Query: 1 TATTGCCCGGGTCAGATC-AA 20  
| | | | | | | | | | | | | | | | | | | \* \* |  
Sbjct: 1195 ATAACGGGCCAGTCTAGCGT 1175  
>novel\_mir\_58 Score: 2.0 R03G\_10038  
Query: 1 TCTACTTTACAAGGTCTGGTGG 22  
| | : | | | | \* | | | | | : | | | | | | | | | |  
Sbjct: 78 AGGTGAATTGTTCTAGACCACC 57  
>novel\_mir\_58 Score: 1.5 R03G\_09176  
Query: 1 TCTACTTTACAAGGTCTGGTGG 22  
| | | | | | | | | | \* | | | | : | | | | | | | | | |  
Sbjct: 59 AGATGAAATATTCTAGACCACC 38  
>novel\_mir\_58 Score: 0.0 R03G\_07315  
Query: 1 TCTACTTTACAAGGTCTGGTGG 22  
| | | | | | | | | | | | | | | | | | | | | | | | | | | |  
Sbjct: 59 AGATGAAATGTTCCAGACCACC 38  
>novel\_mir\_58 Score: 2.5 R03G\_17467  
Query: 1 TCTACTTTACAAGGTCTGGTGG 22  
| | \* | | | | | | \* | | | | : | | | | | | | | | | | |  
Sbjct: 59 AGTTGAAATATTCTAGACCACC 38  
>novel\_mir\_80 Score: 0.0 R03G\_16160  
Query: 1 TG TAGCTTTTCCTTTGCCTTTG 22  
| | | | | | | | | | | | | | | | | | | | | | | | | | | |  
Sbjct: 180 ACATCGAAAAGGAAACGGAAAC 159  
>novel\_mir\_80 Score: 0.0 R03G\_14219  
Query: 1 TG TAGCTTTTCCTTTGCCTTTG 22  
| | | | | | | | | | | | | | | | | | | | | | | | | | | |  
Sbjct: 180 ACATCGAAAAGGAAACGGAAAC 159  
>novel\_mir\_80 Score: 0.5 R03G\_13308  
Query: 1 TG TAGCTTTTCCTTTGCCTTTG 22

|||||:|||||  
Sbjct: 162 ACATCGGAAAGGAAACGGAAAC 141  
>novel\_mir\_80 Score: 2.0 R03G\_13466  
Query: 1 TGTAGCTTTTCCTTTGCCTTTG 22  
\*|||||:|||||\*|||  
Sbjct: 258 TCATCGGAAAGGAAACGATAAC 237  
>novel\_mir\_80 Score: 1.5 R03G\_10242  
Query: 1 TGTAGCTTTTCCTTTGCCTTTG 22  
|:|||||\*|||||  
Sbjct: 180 ATATCGAAAATGAAACGGAAAC 159  
>novel\_mir\_80 Score: 0.0 R03G\_10303  
Query: 1 TGTAGCTTTTCCTTTGCCTTTG 22  
|||||  
Sbjct: 120 ACATCGAAAAGGAAACGGAAAC 99  
>novel\_mir\_80 Score: 1.5 R03G\_10415  
Query: 1 TGTAGCTTTTCCTTTGCCTTTG 22  
|:|||||\*|||||  
Sbjct: 162 ATATCGAAAATGAAACGGAAAC 141  
>novel\_mir\_80 Score: 1.0 R03G\_10665  
Query: 1 TGTAGCTTTTCCTTTGCCTTTG 22  
|||||\*|||||  
Sbjct: 204 ACATCGAAAAGGAAACAGAAAC 183  
>novel\_mir\_80 Score: 2.5 R03G\_09224  
Query: 1 TGTAGCTTTTCCTTTGCCTTTG 22  
|||||:|||||\*|||\*  
Sbjct: 135 ACATCGGAAAGGAAACAAAAAA 114  
>novel\_mir\_80 Score: 2.5 R03G\_10093  
Query: 1 TGTAGCTTTTCCTTTGCCTTTG 22  
\*|||||:|||||:|\*|||  
Sbjct: 3777 CCATCGAAAAGGAAGTGG-CAC 3757  
>novel\_mir\_80 Score: 0.0 R03G\_08369  
Query: 1 TGTAGCTTTTCCTTTGCCTTTG 22  
|||||  
Sbjct: 180 ACATCGAAAAGGAAACGGAAAC 159  
>novel\_mir\_80 Score: 2.0 R03G\_06787  
Query: 1 TGTAGCTTTTCCTTTGCCTTTG 22  
|||||:|||||\*|||||  
Sbjct: 180 ACATCGGAAAGGAAATAGAAAC 159  
>novel\_mir\_80 Score: 2.5 R03G\_07496  
Query: 1 TGTAGCTTTTCCTTTGCCTTTG 22  
\*|||||:|||||:|\*|||  
Sbjct: 258 TCATCGGAAAGGAAATGACAAC 237  
>novel\_mir\_80 Score: 0.5 R03G\_03080  
Query: 1 TGTAGCTTTTCCTTTGCCTTTG 22  
|:|||||

Sbjct: 93 ATATCGAAAAGGAAACGGAAAC 72  
>novel\_mir\_80 Score: 1.5 R03G\_03876  
Query: 1 TGTAGCTTTTCCTTTGCCTTTG 22  
|:|||||\*|||||  
Sbjct: 180 ATATCGAAAAGGAAACAGAAAC 159  
>novel\_mir\_80 Score: 2.0 R03G\_00384  
Query: 1 TGTAGCTTTTCCTTTGCCTTTG 22  
|\*|||||\*|||||  
Sbjct: 63 AGATCGAAAAGAAAACGGAAAC 42  
>novel\_mir\_78 Score: 0.0 R03G\_12520  
Query: 1 TAGCGTAAAAGATCGAAAGA 20  
|||||  
Sbjct: 2001 ATCGCATTTTCTAGCTTTCT 1982  
>novel\_mir\_78 Score: 1.0 R03G\_11933  
Query: 1 TAGCGTAAAAGATCGAAAGA 20  
|||||\*|||||  
Sbjct: 441 ATCGCATTTTATAGCTTTCT 422  
>novel\_mir\_78 Score: 0.0 R03G\_00797  
Query: 1 TAGCGTAAAAGATCGAAAGA 20  
|||||  
Sbjct: 2001 ATCGCATTTTCTAGCTTTCT 1982  
>novel\_mir\_103 Score: 0.0 R03G\_13622  
Query: 1 TGTATCGAAGAGGAGGTCGG 20  
|||||  
Sbjct: 195 ACATAGCTTCTCCTCCAGCC 176  
>novel\_mir\_103 Score: 2.2 R03G\_10577  
Query: 1 TGTATCGAAGAGGAGGTCGG 20  
|:|||||\*|||||\*|:  
Sbjct: 73 ATATAGCTTGCCTCCA-CT 55  
>novel\_mir\_103 Score: 2.5 R03G\_00604  
Query: 1 TGTATCGAAGAGGAGGTCGG 20  
\*|||||\*|||||\*::  
Sbjct: 52 TCATAGCTTATCCTCCA-TT 34  
>novel\_mir\_103 Score: 0.0 R03G\_01932  
Query: 1 TGTATCGAAGAGGAGGTCGG 20  
|||||  
Sbjct: 105 ACATAGCTTCTCCTCCAGCC 86  
>novel\_mir\_113 Score: 0.0 R03G\_16699  
Query: 1 TTAGGGTGGTGTATAAGTCAA 22  
|||||  
Sbjct: 298 AATCCCACCACAATATTCAGTT 277  
>novel\_mir\_113 Score: 1.5 R03G\_16426  
Query: 1 TTAGGGTGGTGTATAAGTCAA 22  
|||||:|||||\*|||||  
Sbjct: 298 AATCCCATCACAAACATTCAGTT 277

>novel\_mir\_113 Score: 0.0 R03G\_14564  
Query: 1 TTAGGGTGGTGTATAAGTCAA 22  
|||||  
Sbjct: 298 AATCCCACCACAATATTCAGTT 277

>novel\_mir\_113 Score: 0.0 R03G\_13770  
Query: 1 TTAGGGTGGTGTATAAGTCAA 22  
|||||  
Sbjct: 298 AATCCCACCACAATATTCAGTT 277

>novel\_mir\_113 Score: 0.0 R03G\_12177  
Query: 1 TTAGGGTGGTGTATAAGTCAA 22  
|||||  
Sbjct: 298 AATCCCACCACAATATTCAGTT 277

>novel\_mir\_113 Score: 0.0 R03G\_11267  
Query: 1 TTAGGGTGGTGTATAAGTCAA 22  
|||||  
Sbjct: 298 AATCCCACCACAATATTCAGTT 277

>novel\_mir\_113 Score: 0.2 R03G\_11280  
Query: 1 TTAGGGTGGTGTATAAGTCAA 22  
:|||||  
Sbjct: 298 GATCCCACCACAATATTCAGTT 277

>novel\_mir\_113 Score: 0.0 R03G\_10549  
Query: 1 TTAGGGTGGTGTATAAGTCAA 22  
|||||  
Sbjct: 298 AATCCCACCACAATATTCAGTT 277

>novel\_mir\_113 Score: 0.0 R03G\_09959  
Query: 1 TTAGGGTGGTGTATAAGTCAA 22  
|||||  
Sbjct: 298 AATCCCACCACAATATTCAGTT 277

>novel\_mir\_113 Score: 0.0 R03G\_07995  
Query: 1 TTAGGGTGGTGTATAAGTCAA 22  
|||||  
Sbjct: 298 AATCCCACCACAATATTCAGTT 277

>novel\_mir\_113 Score: 0.0 R03G\_08653  
Query: 1 TTAGGGTGGTGTATAAGTCAA 22  
|||||  
Sbjct: 298 AATCCCACCACAATATTCAGTT 277

>novel\_mir\_113 Score: 0.0 R03G\_05638  
Query: 1 TTAGGGTGGTGTATAAGTCAA 22  
|||||  
Sbjct: 298 AATCCCACCACAATATTCAGTT 277

>novel\_mir\_113 Score: 0.0 R03G\_05904  
Query: 1 TTAGGGTGGTGTATAAGTCAA 22  
|||||  
Sbjct: 298 AATCCCACCACAATATTCAGTT 277

>novel\_mir\_113 Score: 0.0 R03G\_06413

Query: 1 TTAGGGTGGTGTATAAGTCAA 22  
|||||  
Sbjct: 91 AATCCCACCACAATATTCAGTT 70  
>novel\_mir\_113 Score: 1.5 R03G\_03936  
Query: 1 TTAGGGTGGTGTATAAGTCAA 22  
|||||:||||\*|||||  
Sbjct: 298 AATCCCATCACAAACATTCAGTT 277  
>novel\_mir\_113 Score: 0.0 R03G\_01305  
Query: 1 TTAGGGTGGTGTATAAGTCAA 22  
|||||  
Sbjct: 298 AATCCCACCACAATATTCAGTT 277  
>novel\_mir\_113 Score: 0.0 R03G\_01700  
Query: 1 TTAGGGTGGTGTATAAGTCAA 22  
|||||  
Sbjct: 352 AATCCCACCACAATATTCAGTT 331  
>novel\_mir\_127 Score: 2.5 R03G\_15195  
Query: 1 TGCTTGATAAGTAGTGACCACC 22  
|\*||||\*||||\*|||  
Sbjct: 2022 AAGAACTACTCATCACT-GTGG 2002  
>novel\_mir\_127 Score: 2.5 R03G\_14100  
Query: 1 TGCTTGATAAGTAGTGACCACC 22  
||\*|||||:|\*|||  
Sbjct: 445 ACGCACTATTCATCGTTTGTGG 424  
>novel\_mir\_127 Score: 2.5 R03G\_09388  
Query: 1 TGCTTGATAAGTAGTGACCACC 22  
||:|:|||||:||\*|  
Sbjct: 1038 ACGGTTATTCATCATTGGTTG 1017  
>novel\_mir\_102 Score: 1.0 R03G\_12136  
Query: 1 TAATACGTTGTATCTTAGCAGG 22  
||||\*|||||  
Sbjct: 598 ATTATACAACATAGAATCGTCC 577  
>novel\_mir\_102 Score: 0.0 R03G\_12142  
Query: 1 TAATACGTTGTATCTTAGCAGG 22  
|||||  
Sbjct: 598 ATTATGCAACATAGAATCGTCC 577  
>novel\_mir\_102 Score: 0.0 R03G\_12521  
Query: 1 TAATACGTTGTATCTTAGCAGG 22  
|||||  
Sbjct: 598 ATTATGCAACATAGAATCGTCC 577  
>novel\_mir\_102 Score: 0.5 R03G\_09105  
Query: 1 TAATACGTTGTATCTTAGCAGG 22  
|||||\*|  
Sbjct: 316 ATTATGCAACATAGAATCGTAC 295  
>novel\_mir\_102 Score: 1.0 R03G\_06904  
Query: 1 TAATACGTTGTATCTTAGCAGG 22

|||||:||||:|||||||  
Sbjct: 316 ATTATGTAACATGGAATCGTCC 295  
>novel\_mir\_102 Score: 1.0 R03G\_05791  
Query: 1 TAATACGTTGTATCTTAGCAGG 22  
||||\*|||||||  
Sbjct: 313 ATTATACAACATAGAATCGTCC 292  
>novel\_mir\_102 Score: 0.0 R03G\_04244  
Query: 1 TAATACGTTGTATCTTAGCAGG 22  
|||||||  
Sbjct: 316 ATTATGCAACATAGAATCGTCC 295  
>novel\_mir\_102 Score: 0.0 R03G\_00798  
Query: 1 TAATACGTTGTATCTTAGCAGG 22  
|||||||  
Sbjct: 598 ATTATGCAACATAGAATCGTCC 577  
>novel\_mir\_102 Score: 0.0 R03G\_01651  
Query: 1 TAATACGTTGTATCTTAGCAGG 22  
|||||||  
Sbjct: 379 ATTATGCAACATAGAATCGTCC 358  
>novel\_mir\_117 Score: 2.5 R03G\_16685  
Query: 1 TAATGGCAGGGATGATAGAAG 21  
|||::||||:|\*|||||  
Sbjct: 115 ATTGTCGTCCTTAGTATCTTC 95  
>novel\_mir\_117 Score: 2.5 R03G\_11105  
Query: 1 TAATGGCAGGGATGATAGAAG 21  
||||||\*|:|:||||\*||  
Sbjct: 34 ATTACCGACTCTGCTATCGTC 14  
>novel\_mir\_117 Score: 2.5 R03G\_11036  
Query: 1 TAATGGCAGGGATGATAGAAG 21  
||||:||||\*:||||||\*||  
Sbjct: 1039 ATTATCGTCATTACTATCGTC 1019  
>novel\_mir\_117 Score: 2.0 R03G\_04995  
Query: 1 TAATGGCAGGGATGATAGAAG 21  
|||||||\*|||\*||\*  
Sbjct: 631 ATTACCGTCCCTCCTATATTA 611  
>novel\_mir\_117 Score: 2.5 R03G\_03964  
Query: 1 TAATGGCAGGGATGATAGAAG 21  
\*|||||\*|||||||\*\*  
Sbjct: 6604 TTTACCGACCCTACTATCTAA 6584  
>novel\_mir\_117 Score: 0.0 R03G\_00202  
Query: 1 TAATGGCAGGGATGATAGAAG 21  
|||||||  
Sbjct: 701 ATTACCGTCCCTACTATCTTC 681  
>novel\_mir\_117 Score: 2.2 R03G\_01175  
Query: 1 TAATGGCAGGGATGATAGAAG 21  
:|\*|||||:||||:|||||



Sbjct: 475 GTTTCCGTCCTTACTGTCTTC 455  
>novel\_mir\_117 Score: 2.5 R03G\_01267  
Query: 1 TAATGGCAGGGATGATAGAAG 21  
||||:|:|:|:|\*  
Sbjct: 190 ATTACTGTCTCTATTGTCTTG 170  
>novel\_mir\_43 Score: 2.5 R03G\_16061  
Query: 1 TCTTTTCGTTTCTATTTGCTTT 22  
||||||\*:||||||\*|||  
Sbjct: 244 AGAAAAGAGAAGATAAA-AAAA 224  
>novel\_mir\_43 Score: 0.0 R03G\_15585  
Query: 1 TCTTTTCGTTTCTATTTGCTTT 22  
|||||||  
Sbjct: 1407 AGAAAAGCAAAGATAAACGAAA 1386  
>novel\_mir\_43 Score: 2.0 R03G\_15236  
Query: 1 TCTTTTCGTTTCTATTTGCTTT 22  
|\*||||:||||||\*|||  
Sbjct: 243 AAAAAAGTAAAGATAAAC-AAA 223  
>novel\_mir\_43 Score: 1.2 R03G\_15250  
Query: 1 TCTTTTCGTTTCTATTTGCTTT 22  
||||||\*|||||||:|  
Sbjct: 1407 AGAAAAGCTAAGATAAACGGAA 1386  
>novel\_mir\_43 Score: 2.2 R03G\_14388  
Query: 1 TCTTTTCGTTTCTATTTGCT-TT 22  
||||||:||||\*||||\*|  
Sbjct: 250 AGAAAAGTAAAGAAAAACGACGA 228  
>novel\_mir\_43 Score: 0.0 R03G\_13867  
Query: 1 TCTTTTCGTTTCTATTTGCTTT 22  
|||||||  
Sbjct: 1323 AGAAAAGCAAAGATAAACGAAA 1302  
>novel\_mir\_43 Score: 0.2 R03G\_13920  
Query: 1 TCTTTTCGTTTCTATTTGCTTT 22  
|||||||:|  
Sbjct: 1407 AGAAAAGCAAAGATAAACGGAA 1386  
>novel\_mir\_43 Score: 2.2 R03G\_14100  
Query: 1 TCTTTTCGTTTCTATTTGCTTT 22  
:|:|:|:|:|:|:|\*|||  
Sbjct: 202 GGAGAAGTAAAGATAGAAGAAA 181  
>novel\_mir\_43 Score: 0.2 R03G\_11234  
Query: 1 TCTTTTCGTTTCTATTTGCTTT 22  
|||||||:|  
Sbjct: 1407 AGAAAAGCAAAGATAAACGGAA 1386  
>novel\_mir\_43 Score: 2.5 R03G\_10287  
Query: 1 TCTTTTCGTTTCTATTTGCTTT 22  
:|:|:|:|:|:|:|\*|||:  
Sbjct: 94 GGGAAAGCGGAGATAAAGGAAG 73

>novel\_mir\_43 Score: 2.5 R03G\_11015  
Query: 1 TCTTTTCGTTTCTATTTGCTTT 22  
|||||\*||||\*|||\*|||  
Sbjct: 801 AGAAAAGAAAAGAGAAACAAA 780

>novel\_mir\_43 Score: 0.2 R03G\_09965  
Query: 1 TCTTTTCGTTTCTATTTGCTTT 22  
|||||:|  
Sbjct: 1407 AGAAAAGCAAAGATAAACGGAA 1386

>novel\_mir\_43 Score: 0.2 R03G\_08608  
Query: 1 TCTTTTCGTTTCTATTTGCTTT 22  
|||||:|  
Sbjct: 1923 AGAAAAGCAAAGATAAACGGAA 1902

>novel\_mir\_43 Score: 0.2 R03G\_07036  
Query: 1 TCTTTTCGTTTCTATTTGCTTT 22  
|||||:|  
Sbjct: 609 AGAAAAGCAAAGATAAACGGAA 588

>novel\_mir\_43 Score: 2.5 R03G\_07659  
Query: 1 TCTTTTCGTTTCTATTTGCTTT 22  
|||||\*||\*||:|||||  
Sbjct: 169 AGAAAAGAAAAAATGAACGAAA 148

>novel\_mir\_43 Score: 2.5 R03G\_07958  
Query: 1 TCTTTTCGTTTCTATTTGCTTT 22  
|||||:||\*||:|\*|||  
Sbjct: 1888 AGAAAAGTAAAAATAGAAGAAA 1867

>novel\_mir\_43 Score: 0.2 R03G\_05617  
Query: 1 TCTTTTCGTTTCTATTTGCTTT 22  
|||||:|  
Sbjct: 1407 AGAAAAGCAAAGATAAACGGAA 1386

>novel\_mir\_43 Score: 0.2 R03G\_06427  
Query: 1 TCTTTTCGTTTCTATTTGCTTT 22  
|||||:|  
Sbjct: 999 AGAAAAGCAAAGATAAACGGAA 978

>novel\_mir\_43 Score: 0.2 R03G\_06428  
Query: 1 TCTTTTCGTTTCTATTTGCTTT 22  
|||||:|  
Sbjct: 501 AGAAAAGCAAAGATAAACGGAA 480

>novel\_mir\_43 Score: 0.2 R03G\_06442  
Query: 1 TCTTTTCGTTTCTATTTGCTTT 22  
|||||:|  
Sbjct: 2064 AGAAAAGCAAAGATAAACGGAA 2043

>novel\_mir\_43 Score: 0.2 R03G\_05272  
Query: 1 TCTTTTCGTTTCTATTTGCTTT 22  
|||||:|  
Sbjct: 1407 AGAAAAGCAAAGATAAACGGAA 1386

>novel\_mir\_43 Score: 0.2 R03G\_02691

Query: 1 TCTTTTCGTTTCTATTTGCTTT 22  
|||||||:|  
Sbjct: 4896 AGAAAAGCAAAGATAAACGGAA 4875  
>novel\_mir\_43 Score: 0.2 R03G\_02959  
Query: 1 TCTTTTCGTTTCTATTTGCTTT 22  
|||||||:|  
Sbjct: 1407 AGAAAAGCAAAGATAAACGGAA 1386  
>novel\_mir\_43 Score: 0.2 R03G\_03547  
Query: 1 TCTTTTCGTTTCTATTTGCTTT 22  
|||||||:|  
Sbjct: 1407 AGAAAAGCAAAGATAAACGGAA 1386  
>novel\_mir\_43 Score: 0.2 R03G\_04114  
Query: 1 TCTTTTCGTTTCTATTTGCTTT 22  
|||||||:|  
Sbjct: 1407 AGAAAAGCAAAGATAAACGGAA 1386  
>novel\_mir\_43 Score: 2.2 R03G\_00416  
Query: 1 TCTTTTCGTTTCTATTTG-CTTT 22  
\*|||||:|\*|||  
Sbjct: 78 TGAAAAGTGAAGATAAACAGAGA 56  
>novel\_mir\_43 Score: 0.0 R03G\_01329  
Query: 1 TCTTTTCGTTTCTATTTGCTTT 22  
|||||||  
Sbjct: 255 AGAAAAGCAAAGATAAACGAAA 234  
>novel\_mir\_43 Score: 1.0 R03G\_01615  
Query: 1 TCTTTTCGTTTCTATTTGCTTT 22  
|||\*|||||||  
Sbjct: 960 AGATAAGCAAAGATAAACGAAA 939  
>novel\_mir\_43 Score: 0.2 R03G\_02221  
Query: 1 TCTTTTCGTTTCTATTTGCTTT 22  
|||||||:|  
Sbjct: 1329 AGAAAAGCAAAGATAAACGGAA 1308  
>novel\_mir\_43 Score: 1.2 R03G\_17371  
Query: 1 TCTTTTCGTTTCTATTTGCTTT 22  
|||||||\*|||||||:|  
Sbjct: 1407 AGAAAAGCTAAGATAAACGGAA 1386  
>novel\_mir\_43 Score: 0.0 R03G\_17326  
Query: 1 TCTTTTCGTTTCTATTTGCTTT 22  
|||||||  
Sbjct: 1240 AGAAAAGCAAAGATAAACGAAA 1219  
>novel\_mir\_97 Score: 0.5 R03G\_07871  
Query: 1 TGCCAAAGTTTGCTGCATTGCG 22  
|||||||\*|  
Sbjct: 849 ACGGTTTCAAACGACGTAACAC 828  
>novel\_mir\_42 Score: 2.2 R03G\_16847  
Query: 1 TTGGTTGCTCTTTGTAAGTC 20

\*|||||||::|||:|\*  
Sbjct: 772 TACCAACGAGAAGTATTTAC 753  
>novel\_mir\_42 Score: 2.5 R03G\_15433  
Query: 1 TTGGTTGCTCTTTGTAAGTC 20  
||||:|\*|||:||||  
Sbjct: 2183 AACCAAGTAAAAACGTTTCAG 2164  
>novel\_mir\_42 Score: 2.2 R03G\_15200  
Query: 1 TTGGTTGCTCTTTGTAAG-TC 20  
|||:||||:|||||||:|\*|\*  
Sbjct: 570 AACTAACGGGAAACATTTTCAT 550  
>novel\_mir\_42 Score: 2.5 R03G\_13519  
Query: 1 TTGGTTGCTCTTTGTAAGTC 20  
|:|:|||||||::|\*||  
Sbjct: 1252 AGCTAACGAGAAATGTT-AG 1234  
>novel\_mir\_42 Score: 2.5 R03G\_12689  
Query: 1 TTGGTTGCTCTTTGTAAGTC 20  
||||\*||||\*|||||||\*  
Sbjct: 817 AACCTACGAAAAACATTCAC 798  
>novel\_mir\_42 Score: 2.0 R03G\_12738  
Query: 1 TTGGTTGCTCTTTGTAAGTC 20  
|||||||:|\*|:|  
Sbjct: 109 AACCAACGAGAAATAGTTGG 90  
>novel\_mir\_42 Score: 2.2 R03G\_13173  
Query: 1 TTGGTTGCTCTTTGTAAGTC 20  
|||||||\*|\*|\*|\*|  
Sbjct: 1097 AACCAACGAGAACTATT-GG 1079  
>novel\_mir\_42 Score: 2.2 R03G\_12001  
Query: 1 TTGGTTGCTCTTTGTAAGTC 20  
:|\*|||:|||||||\*|  
Sbjct: 679 GACCCACGGGAAACATTCTG 660  
>novel\_mir\_42 Score: 1.5 R03G\_11190  
Query: 1 TTGGTTGCTCTTTGTAAG-TC 20  
||||:|||||:|||||\*||  
Sbjct: 149 AACCGACGAGAGACATTCCAG 129  
>novel\_mir\_42 Score: 1.8 R03G\_11625  
Query: 1 TTGGTTGCTCTTTGTAAGTC 20  
||||:||||:|||||:|\*  
Sbjct: 722 AACCAAGCGAGGAACATTTAT 703  
>novel\_mir\_42 Score: 2.2 R03G\_10556  
Query: 1 TTGGTTGCTCTTTGTAAGTC 20  
:|\*|||:|||||||\*|  
Sbjct: 679 GACCCACGGGAAACATTCTG 660  
>novel\_mir\_42 Score: 2.5 R03G\_09599  
Query: 1 TTGGTTGCTCTTTGTAAGTC 20  
||||:||||:|:||||\*|\*

Sbjct: 209 AACCGACGAGGAGCATTGAC 190  
 >novel\_mir\_42 Score: 0.5 R03G\_08820  
 Query: 1 TTGGTTGCTCTTTGTAAGTC 20  
 |||:|||||

Sbjct: 558 AACCAACGGGAAACATTTCAG 539  
 >novel\_mir\_42 Score: 2.0 R03G\_08984  
 Query: 1 TTGGTTGCTCTTTGTAAGTC 20  
 ||||\*|||||||\*|\*

Sbjct: 431 AACCCACGAGAAACATT-AT 413  
 >novel\_mir\_42 Score: 2.5 R03G\_05586  
 Query: 1 TTGGTTGCTCTTTGTAAGTC 20  
 \*|||||\*|||||||\*|\*

Sbjct: 689 CACCAACAAGAAACATTGAC 670  
 >novel\_mir\_42 Score: 2.0 R03G\_05817  
 Query: 1 TTGGTTGCTCTTTGTAAGTC 20  
 |||||\*||\*|||

Sbjct: 26 AACCAACGACGAACATT-AG 8  
 >novel\_mir\_42 Score: 2.5 R03G\_04454  
 Query: 1 TTGGTTGCTCTTTGTAAGT-C 20  
 \*\*||:|||||||\*|

Sbjct: 291 TCCCGACGAGAAACATTCACG 271  
 >novel\_mir\_42 Score: 2.5 R03G\_04754  
 Query: 1 TTGGTTGCTCTTTGTAAGTC 20  
 ||||:|||||:|\*:|||||

Sbjct: 2420 AACCGACGAGGAAAGTTCAG 2401  
 >novel\_mir\_42 Score: 2.2 R03G\_03530  
 Query: 1 TTGGTTGCTCTTTGTAAGTC 20  
 |||||\*|||||\*:||\*|

Sbjct: 1100 AACCAACGAGAACTATT-GG 1082  
 >novel\_mir\_42 Score: 2.2 R03G\_00617  
 Query: 1 TTGGTTGCTCTTTGTAAGTC 20  
 :|||\*|||:|||||||\*|

Sbjct: 523 GACCCACGGGAAACATTCTG 504  
 >novel\_mir\_42 Score: 2.2 R03G\_01302  
 Query: 1 TTGGTTGCTCTTTGTAAGTC 20  
 :|||\*|||:|||||||\*|

Sbjct: 250 GACCCACGGGAAACATTCTG 231  
 >novel\_mir\_42 Score: 2.2 R03G\_17369  
 Query: 1 TTGGTTGCTCTTTGTAAGTC 20  
 :|||\*|||:|||||||\*|

Sbjct: 679 GACCCACGGGAAACATTCTG 660  
 >novel\_mir\_18 Score: 2.0 R03G\_06944  
 Query: 1 TGGAGCCAACCTGAGATTGAT 20  
 ||\*|||||||::|||||||

Sbjct: 157 ACATCGGTTGGTTCTAACTA 138

>novel\_mir\_95 Score: 2.0 R03G\_14951  
Query: 1 TGATGAAGGATAGTGGCATGAT 22  
|||||||\*|||\*  
Sbjct: 1088 ACTACTTCCTATCGCTGGACTC 1067

>novel\_mir\_95 Score: 2.0 R03G\_04525  
Query: 1 TGATGAAGGATAGTGGCATGAT 22  
|||||||\*|||\*  
Sbjct: 1079 ACTACTTCCTATCGCTGAACTC 1058

>novel\_mir\_95 Score: 2.0 R03G\_04544  
Query: 1 TGATGAAGGATAGTGGCATGAT 22  
|||||||\*|||\*  
Sbjct: 1022 ACTACTTCCTATCGCTGAACTC 1001

>novel\_mir\_95 Score: 2.0 R03G\_03979  
Query: 1 TGATGAAGGATAGTGGCATGAT 22  
|||||||\*|||\*|||\*  
Sbjct: 632 ACTACTTCATATCACCG-ACGA 612

>novel\_mir\_13 Score: 2.5 R03G\_15104  
Query: 1 TACGTTTCAGGTAAGAGAGGA 20  
:\*|::|:|  
Sbjct: 884 GTACGGGTCCATTCTCTTCT 865

>novel\_mir\_13 Score: 1.0 R03G\_11961  
Query: 1 TACGTTTCAGGTAAGAGAGGA 20  
||||||\*|||  
Sbjct: 571 ATGCAAGCCCATTCTCTCCT 552

>novel\_mir\_13 Score: 2.0 R03G\_10247  
Query: 1 TACGTTTCAGGTAAGAGAGGA 20  
\*|||:|:|\*||  
Sbjct: 469 TTGCAGGTCTATTCTCT-CT 451

>novel\_mir\_13 Score: 0.0 R03G\_09594  
Query: 1 TACGTTTCAGGTAAGAGAGGA 20  
|||||||  
Sbjct: 66 ATGCAAGTCCATTCTCTCCT 47

>novel\_mir\_13 Score: 2.5 R03G\_06102  
Query: 1 TACGTTTCAGGTAAGAGAGGA 20  
|||||||:|\*||  
Sbjct: 196 ATGCAAGTCTGTTCTCGACT 177

>novel\_mir\_13 Score: 2.0 R03G\_06107  
Query: 1 TACGTTTCAGGTAAGAGAGGA 20  
:|:|\*|||:|  
Sbjct: 1190 GTGCAGGTCCACTCTCTTCT 1171

>novel\_mir\_19 Score: 0.0 R03G\_06718  
Query: 1 TGGTCTGTAGGATCGAGTACTA 22  
|||||||  
Sbjct: 128 ACCAGACATCCTAGCTCATGAT 107

>novel\_mir\_124 Score: 1.8 R03G\_17265

Query: 1 TGCTCTTGTTGCTGTTGTTG 20  
||||\*:|||||||:|  
Sbjct: 269 ACGACGACAACGACAACGAC 250  
>novel\_mir\_124 Score: 0.0 R03G\_17242  
Query: 1 TGCTCTTGTTGCTGTTGTTG 20  
|||||||  
Sbjct: 338 ACGAGAACAACGACAACAAC 319  
>novel\_mir\_124 Score: 1.8 R03G\_17244  
Query: 1 TGCTCTTGTTGCTGTTGTTG 20  
||||\*:|||||||:|  
Sbjct: 365 ACGACGACAACGACAACGAC 346  
>novel\_mir\_124 Score: 2.5 R03G\_17175  
Query: 1 TGCTCTTGTTGCTGTTGTTG 20  
||||\*|:|\*|||||||  
Sbjct: 134 ACGAGTATTACGACAACAAC 115  
>novel\_mir\_124 Score: 2.5 R03G\_17036  
Query: 1 TGCTCTTGTTGCTGTTGTTG 20  
||\*|||||:|||||\*|||||  
Sbjct: 1742 ACAAGAACGACGACTACAAC 1723  
>novel\_mir\_124 Score: 2.5 R03G\_17050  
Query: 1 TGCTCTTGTTGCTGTTGTTG 20  
\*:|||||:|||||:|\*||  
Sbjct: 211 CTGAGAACGACGACGAC-AC 193  
>novel\_mir\_124 Score: 2.5 R03G\_17055  
Query: 1 TGCTCTTGTTGCTGTTGTTG 20  
\*|||\*|||||\*|||||||  
Sbjct: 2243 TCGAAAACAACAACAACAAC 2224  
>novel\_mir\_124 Score: 1.8 R03G\_16901  
Query: 1 TGCTCTTGTTGCTGTTGTTG 20  
||||\*:|||||||:|  
Sbjct: 374 ACGACGACAACGACAACGAC 355  
>novel\_mir\_124 Score: 1.8 R03G\_16917  
Query: 1 TGCTCTTGTTGCTGTTGTTG 20  
||||\*:|||||||:|  
Sbjct: 380 ACGACGACAACGACAACGAC 361  
>novel\_mir\_124 Score: 1.8 R03G\_16743  
Query: 1 TGCTCTTGTTGCTGTTGTTG 20  
||||\*:|||||||:|  
Sbjct: 326 ACGACGACAACGACAACGAC 307  
>novel\_mir\_124 Score: 2.0 R03G\_16582  
Query: 1 TGCTCTTGTTGCTGTTGTTG 20  
||\*|||||:|||||:|||||  
Sbjct: 134 ACAAGAACGACGACGACAAC 115  
>novel\_mir\_124 Score: 2.5 R03G\_16607  
Query: 1 TGCTCTTGTTGCTGTTGTTG 20

```

||*||*|||||||*||
Sbjct: 918 ACCACAACAACGACAACCAC 899
>novel_mir_124 Score: 2.2 R03G_16607
Query: 1 TGCTCTTGTTGCTGTTGTTG 20
*||*||*|||||||*||
Sbjct: 805 TTGACAACAACGACAACGAC 786
>novel_mir_124 Score: 1.5 R03G_16618
Query: 1 TGCTCTTGTTGCTGTTGTTG 20
||||*||*|||||||*||
Sbjct: 2273 ACGACGACAACGACAACAAC 2254
>novel_mir_124 Score: 1.8 R03G_16369
Query: 1 TGCTCTTGTTGCTGTTGTTG 20
||||*||*|||||||*||
Sbjct: 347 ACGACGACAACGACAACGAC 328
>novel_mir_124 Score: 2.0 R03G_16404
Query: 1 TGCTCTTGTTGCTGTTGTTG 20
||||*||*|||||||*||
Sbjct: 665 ACGACAACAACAACAACAAC 646
>novel_mir_124 Score: 2.5 R03G_16404
Query: 1 TGCTCTTGTTGCTGTTGTTG 20
||*||*|||||||*||
Sbjct: 641 ACAACAACAACGACAACAAG 622
>novel_mir_124 Score: 2.5 R03G_16460
Query: 1 TGCTCTTGTTGCTGTTGTTG 20
||*||*|||:|||||||*||
Sbjct: 608 ACAACAACGACGACAACAAC 589
>novel_mir_124 Score: 2.2 R03G_16481
Query: 1 TGCTCTTGTTGCTGTTGTTG 20
|*||*||*|||||||*||
Sbjct: 297 AGGATAACAACGACAACAAT 278
>novel_mir_124 Score: 2.5 R03G_16187
Query: 1 TGCTCTTGTTGCTGTTGTTG 20
*||*||*|||||||*||
Sbjct: 470 TCGACAACAACAACAACAAC 451
>novel_mir_124 Score: 2.0 R03G_16262
Query: 1 TGCTCTTGTTGCTGTTGTTG 20
||||*||*|||||||*||
Sbjct: 166 ACGACAACAACAACAACAAC 147
>novel_mir_124 Score: 1.5 R03G_16322
Query: 1 TGCTCTTGTTGCTGTTGTTG 20
||||*||*|||||||*||
Sbjct: 797 ACGACAACAACGACAACACC 778
>novel_mir_124 Score: 2.0 R03G_16326
Query: 1 TGCTCTTGTTGCTGTTGTTG 20
||||*||*|||||||*||

```



Sbjct: 698 ACGACAACAACAACAAC 679  
>novel\_mir\_124 Score: 1.5 R03G\_16326  
Query: 1 TGCTCTTGTTGCTGTTGTTG 20  
||||\*|||:|||||||

Sbjct: 665 ACGACAACGACGACAACAAC 646  
>novel\_mir\_124 Score: 1.8 R03G\_15879  
Query: 1 TGCTCTTGTTGCTGTTGTTG 20  
||||\*:|||||||:|

Sbjct: 287 ACGACGACAACGACAACGAC 268  
>novel\_mir\_124 Score: 2.2 R03G\_15887  
Query: 1 TGCTCTTGTTGCTGTTGTTG 20  
||\*|\*|||||||:|

Sbjct: 386 ACAACAACAACGACAACGAC 367  
>novel\_mir\_124 Score: 1.0 R03G\_15960  
Query: 1 TGCTCTTGTTGCTGTTGTTG 20  
||||\*|||||||

Sbjct: 1610 ACGACAACAACGACAACAAC 1591  
>novel\_mir\_124 Score: 2.0 R03G\_15999  
Query: 1 TGCTCTTGTTGCTGTTGTTG 20  
||||\*||||\*|||||

Sbjct: 935 ACGACAACAACAACAAC 916  
>novel\_mir\_124 Score: 2.2 R03G\_16075  
Query: 1 TGCTCTTGTTGCTGTTGTTG 20  
||||\*|||:||||||\*|:

Sbjct: 59 ACGACAACGACGACAACACTAT 40  
>novel\_mir\_124 Score: 2.2 R03G\_16114  
Query: 1 TGCTCTTGTTGCTGTTGTTG 20  
||\*|\*|||||||:|

Sbjct: 215 ACTACAACAACGACAACGAC 196  
>novel\_mir\_124 Score: 0.0 R03G\_16127  
Query: 1 TGCTCTTGTTGCTGTTGTTG 20  
|||||||

Sbjct: 338 ACGAGAACAACGACAACAAC 319  
>novel\_mir\_124 Score: 1.5 R03G\_15592  
Query: 1 TGCTCTTGTTGCTGTTGTTG 20  
||||\*|||||||:||||

Sbjct: 558 ACGACAACAACGACGACAAC 539  
>novel\_mir\_124 Score: 2.2 R03G\_15594  
Query: 1 TGCTCTTGTTGCTGTTGTTG 20  
|||||||\*|\*|||:|

Sbjct: 665 ACGAGAACAACAAGAACGAC 646  
>novel\_mir\_124 Score: 2.5 R03G\_15633  
Query: 1 TGCTCTTGTTGCTGTTGTTG 20  
||\*|\*|||||||

Sbjct: 677 ACAACGACAACGACAACAAC 658

>novel\_mir\_124 Score: 2.5 R03G\_15299  
Query: 1 TGCTCTTGTTGCTGTTGTTG 20  
||||\*:|||||\*|||||||  
Sbjct: 998 ACGACGACAACAACAACAAC 979  
>novel\_mir\_124 Score: 2.5 R03G\_15299  
Query: 1 TGCTCTTGTTGCTGTTGTTG 20  
\*\*\*|||||||  
Sbjct: 638 TGAAGAACAACGACAACAAC 619  
>novel\_mir\_124 Score: 2.0 R03G\_15329  
Query: 1 TGCTCTTGTTGCTGTTGTTG 20  
||||\*|||||\*|||||||  
Sbjct: 2945 ACGACAACAACAACAACAAC 2926  
>novel\_mir\_124 Score: 2.0 R03G\_15329  
Query: 1 TGCTCTTGTTGCTGTTGTTG 20  
||||\*:||:|||||||  
Sbjct: 2921 ACGACGACGACGACAACAAC 2902  
>novel\_mir\_124 Score: 2.5 R03G\_15357  
Query: 1 TGCTCTTGTTGCTGTTGTTG 20  
||||\*:||:|||||||\*|  
Sbjct: 1071 ACGACGACGACGACAACATC 1052  
>novel\_mir\_124 Score: 2.2 R03G\_15357  
Query: 1 TGCTCTTGTTGCTGTTGTTG 20  
||\*|||||:|||||||:\*  
Sbjct: 324 ACAAGAACGACGACAACAGA 305  
>novel\_mir\_124 Score: 2.5 R03G\_15376  
Query: 1 TGCTCTTGTTGCTGTTGTTG 20  
||||\*|||:||||\*|||||  
Sbjct: 818 ACGAAAACGACGAAAACAAC 799  
>novel\_mir\_124 Score: 1.8 R03G\_15422  
Query: 1 TGCTCTTGTTGCTGTTGTTG 20  
||||\*|||||||:||:||  
Sbjct: 1267 ACGACAACAACGACGACGAC 1248  
>novel\_mir\_124 Score: 2.5 R03G\_15529  
Query: 1 TGCTCTTGTTGCTGTTGTTG 20  
|\*||||\*|||||||\*  
Sbjct: 1166 AGGAGAAGAACGACAACAAA 1147  
>novel\_mir\_124 Score: 2.0 R03G\_14937  
Query: 1 TGCTCTTGTTGCTGTTGTTG 20  
||\*||\*|||||||  
Sbjct: 169 ACAACAACAACGACAACAAC 150  
>novel\_mir\_124 Score: 2.5 R03G\_15018  
Query: 1 TGCTCTTGTTGCTGTTGTTG 20  
||||\*|||:||\*|||||||  
Sbjct: 1383 ACGACAACGACAACAACAAC 1364  
>novel\_mir\_124 Score: 2.5 R03G\_15018

Query: 1 TGCTCTTGTTGCTGTTGTTG 20  
\*:|:\*| ||||| ||||| ||||| |||||  
Sbjct: 1103 CTGGCAACAACGACAACAAC 1084  
>novel\_mir\_124 Score: 2.0 R03G\_15031  
Query: 1 TGCTCTTGTTGCTGTTGTTG 20  
|||\*|: ||||| ||||| ||||| |||||  
Sbjct: 1346 ACGACGACAACGACGACAAC 1327  
>novel\_mir\_124 Score: 2.0 R03G\_15065  
Query: 1 TGCTCTTGTTGCTGTTGTTG 20  
||\*|\*| ||||| ||||| ||||| |||||  
Sbjct: 451 ACAACAACAACGACAACAAC 432  
>novel\_mir\_124 Score: 2.5 R03G\_15079  
Query: 1 TGCTCTTGTTGCTGTTGTTG 20  
\*|||\*| ||||| ||||| ||||| |||||\*\*|  
Sbjct: 689 CCGACAACAACGACAAC-TC 671  
>novel\_mir\_124 Score: 2.0 R03G\_15127  
Query: 1 TGCTCTTGTTGCTGTTGTTG 20  
||\*|\*| ||||| ||||| ||||| |||||  
Sbjct: 34 ACAACAACAACGACAACAAC 15  
>novel\_mir\_124 Score: 2.2 R03G\_15147  
Query: 1 TGCTCTTGTTGCTGTTGTTG 20  
|||\*\*| ||||| ||||| ||||| |||||: ||  
Sbjct: 320 ACGTCAACAACGACAACGAC 301  
>novel\_mir\_124 Score: 2.0 R03G\_15194  
Query: 1 TGCTCTTGTTGCTGTTGTTG 20  
||\*|\*| ||||| ||||| ||||| |||||  
Sbjct: 500 ACAACAACAACGACAACAAC 481  
>novel\_mir\_124 Score: 2.0 R03G\_15194  
Query: 1 TGCTCTTGTTGCTGTTGTTG 20  
|||\*| |||: ||||| ||||| |||||\*  
Sbjct: 257 ACGACAACGACGACAACAAA 238  
>novel\_mir\_124 Score: 2.2 R03G\_15218  
Query: 1 TGCTCTTGTTGCTGTTGTTG 20  
|\*| |||||: ||||| ||||| |||||\*:  
Sbjct: 245 AGGAGAACGACGACAACATT 226  
>novel\_mir\_124 Score: 2.0 R03G\_15224  
Query: 1 TGCTCTTGTTGCTGTTGTTG 20  
|||\*| |||||\*| ||||| |||||  
Sbjct: 1155 ACGACAACAACAACAACAAC 1136  
>novel\_mir\_124 Score: 0.0 R03G\_15256  
Query: 1 TGCTCTTGTTGCTGTTGTTG 20  
||| ||||| ||||| ||||| ||||| |||||  
Sbjct: 338 ACGAGAACAACGACAACAAC 319  
>novel\_mir\_124 Score: 1.2 R03G\_14401  
Query: 1 TGCTCTTGTTGCTGTTGTTG 20

||||\*|||||||:|  
Sbjct: 653 ACGACAACAACGACAACGAC 634  
>novel\_mir\_124 Score: 2.0 R03G\_14449  
Query: 1 TGCTCTTGTTGCTGTTGTTG 20  
||||\*|||||\*|||||||  
Sbjct: 36 ACGACAACAACAACAAC 17  
>novel\_mir\_124 Score: 2.2 R03G\_14456  
Query: 1 TGCTCTTGTTGCTGTTGTTG 20  
||\*|\*|||||||:|  
Sbjct: 623 ACTACAACAACGACAACGAC 604  
>novel\_mir\_124 Score: 1.8 R03G\_14553  
Query: 1 TGCTCTTGTTGCTGTTGTTG 20  
||||\*:|||||||:|  
Sbjct: 368 ACGACGACAACGACAACGAC 349  
>novel\_mir\_124 Score: 2.5 R03G\_14672  
Query: 1 TGCTCTTGTTGCTGTTGTTG 20  
||||\*:||:|||||||:|  
Sbjct: 643 ACGACGACGACGACAATAAC 624  
>novel\_mir\_124 Score: 2.2 R03G\_13941  
Query: 1 TGCTCTTGTTGCTGTTGTTG 20  
\*|||||||:|||||:||:|\*  
Sbjct: 256 CCGAGAACGACGACGACGAA 237  
>novel\_mir\_124 Score: 2.5 R03G\_14005  
Query: 1 TGCTCTTGTTGCTGTTGTTG 20  
||||\*||||\*|||||||\*|  
Sbjct: 1199 ACGACAACACCGACAACACC 1180  
>novel\_mir\_124 Score: 2.0 R03G\_14025  
Query: 1 TGCTCTTGTTGCTGTTGTTG 20  
||||\*|||:|||||||\*||  
Sbjct: 2000 ACGAAAACGACGACAAC-AC 1982  
>novel\_mir\_124 Score: 2.5 R03G\_14056  
Query: 1 TGCTCTTGTTGCTGTTGTTG 20  
|:|\*||||||\*|||||||  
Sbjct: 1384 ATGATAACAACAACAAC 1365  
>novel\_mir\_124 Score: 2.5 R03G\_14057  
Query: 1 TGCTCTTGTTGCTGTTGTTG 20  
|:|\*||||||\*|||||||  
Sbjct: 1384 ATGATAACAACAACAAC 1365  
>novel\_mir\_124 Score: 2.2 R03G\_14111  
Query: 1 TGCTCTTGTTGCTGTTGTTG 20  
||\*|\*|||||||:|  
Sbjct: 38 ACAACAACAACGACAACGAC 19  
>novel\_mir\_124 Score: 2.5 R03G\_14199  
Query: 1 TGCTCTTGTTGCTGTTGTTG 20  
||||\*:|||||||:||\*||

Sbjct: 3290 ACGACGACAACGACGACCAC 3271  
>novel\_mir\_124 Score: 2.0 R03G\_14274  
Query: 1 TGCTCTTGTTGCTGTTGTTG 20  
||||\*|||||\*|||||

Sbjct: 233 ACGACAACAACAACAAC 214  
>novel\_mir\_124 Score: 2.0 R03G\_14274  
Query: 1 TGCTCTTGTTGCTGTTGTTG 20  
||||\*|||||\*|||||

Sbjct: 203 ACGACAACAACGACAAC-TC 185  
>novel\_mir\_124 Score: 2.2 R03G\_14336  
Query: 1 TGCTCTTGTTGCTGTTGTTG 20  
||||\*|||||\*|||||:|

Sbjct: 1502 ACGACAACAACAACGAC 1483  
>novel\_mir\_124 Score: 1.8 R03G\_13452  
Query: 1 TGCTCTTGTTGCTGTTGTTG 20  
||||\*|||||\*|||||:|

Sbjct: 356 ACGACGACAACGACAACGAC 337  
>novel\_mir\_124 Score: 2.5 R03G\_13495  
Query: 1 TGCTCTTGTTGCTGTTGTTG 20  
\*||||\*|||||\*|||||

Sbjct: 146 CCGACATCAACGACAACAAC 127  
>novel\_mir\_124 Score: 2.2 R03G\_13607  
Query: 1 TGCTCTTGTTGCTGTTGTTG 20  
||\*|||||:|||||:||:|

Sbjct: 596 ACAAGAACGACGACGACGAC 577  
>novel\_mir\_124 Score: 0.0 R03G\_13711  
Query: 1 TGCTCTTGTTGCTGTTGTTG 20  
|||||

Sbjct: 338 ACGAGAACAACGACAACAAC 319  
>novel\_mir\_124 Score: 2.0 R03G\_12697  
Query: 1 TGCTCTTGTTGCTGTTGTTG 20  
||||\*|||||\*|||||

Sbjct: 197 ACGACAACAACAACAAC 178  
>novel\_mir\_124 Score: 2.5 R03G\_12732  
Query: 1 TGCTCTTGTTGCTGTTGTTG 20  
||\*|||||\*|||||

Sbjct: 26 ACAACAACAACGACAACAAA 7  
>novel\_mir\_124 Score: 2.0 R03G\_12746  
Query: 1 TGCTCTTGTTGCTGTTGTTG 20  
||||\*|||||\*|||||

Sbjct: 524 ACGACAACAACAACAAC 505  
>novel\_mir\_124 Score: 2.0 R03G\_12746  
Query: 1 TGCTCTTGTTGCTGTTGTTG 20  
||||\*|||:|||||\*||

Sbjct: 488 ACGACAACGACGACAACCAC 469

>novel\_mir\_124 Score: 2.0 R03G\_12847  
Query: 1 TGCTCTTGTTGCTGTTGTTG 20  
||||\*|||||\*|||||  
Sbjct: 623 ACGACAACAACAACAAC 604

>novel\_mir\_124 Score: 1.5 R03G\_12891  
Query: 1 TGCTCTTGTTGCTGTTGTTG 20  
||||\*:|||||  
Sbjct: 2603 ACGACGACAACGACAACAAC 2584

>novel\_mir\_124 Score: 2.5 R03G\_12895  
Query: 1 TGCTCTTGTTGCTGTTGTTG 20  
||\*||\*|||||\*||  
Sbjct: 971 ACAACAACAACGACAAC-AC 953

>novel\_mir\_124 Score: 2.0 R03G\_12904  
Query: 1 TGCTCTTGTTGCTGTTGTTG 20  
||\*||\*|||||\*||  
Sbjct: 1027 ACAACAACAACGACAACAAC 1008

>novel\_mir\_124 Score: 2.0 R03G\_12904  
Query: 1 TGCTCTTGTTGCTGTTGTTG 20  
||||\*|||||\*|||||  
Sbjct: 827 ACGACAACAACAACAAC 808

>novel\_mir\_124 Score: 2.2 R03G\_12938  
Query: 1 TGCTCTTGTTGCTGTTGTTG 20  
||||\*|||||\*||||:|  
Sbjct: 1310 ACGACAACAACAACAACGAC 1291

>novel\_mir\_124 Score: 2.5 R03G\_13025  
Query: 1 TGCTCTTGTTGCTGTTGTTG 20  
||||\*|||||\*||:||||  
Sbjct: 895 ACGACAACAACAACGACAAC 876

>novel\_mir\_124 Score: 2.2 R03G\_13025  
Query: 1 TGCTCTTGTTGCTGTTGTTG 20  
\*:||\*|||||\*||:|  
Sbjct: 844 TTGACAACAACGACAACGAC 825

>novel\_mir\_124 Score: 2.2 R03G\_13039  
Query: 1 TGCTCTTGTTGCTGTTGTTG 20  
||||\*|||||\*||||:|  
Sbjct: 653 ACGACAACAACAACAACGAC 634

>novel\_mir\_124 Score: 2.5 R03G\_13050  
Query: 1 TGCTCTTGTTGCTGTTGTTG 20  
||||\*||\*|||||:||||  
Sbjct: 2786 ACGACACCAACGACGACAAC 2767

>novel\_mir\_124 Score: 0.2 R03G\_13072  
Query: 1 TGCTCTTGTTGCTGTTGTTG 20  
|||||:|  
Sbjct: 296 ACGAGAACAACGACAACGAC 277

>novel\_mir\_124 Score: 1.8 R03G\_12011

Query: 1 TGCTCTTGTTGCTGTTGTTG 20  
||||\*:|||||||:|  
Sbjct: 368 ACGACGACAACGACAACGAC 349  
>novel\_mir\_124 Score: 1.8 R03G\_12078  
Query: 1 TGCTCTTGTTGCTGTTGTTG 20  
||||\*:|||||||:|  
Sbjct: 68 ACGACGACAACGACAACGAC 49  
>novel\_mir\_124 Score: 0.0 R03G\_12192  
Query: 1 TGCTCTTGTTGCTGTTGTTG 20  
|||||||  
Sbjct: 338 ACGAGAACAACGACAACAAC 319  
>novel\_mir\_124 Score: 2.5 R03G\_12236  
Query: 1 TGCTCTTGTTGCTGTTGTTG 20  
||||\*||||\*||:||||  
Sbjct: 1646 ACGACAACAACAACGACAAC 1627  
>novel\_mir\_124 Score: 2.2 R03G\_12391  
Query: 1 TGCTCTTGTTGCTGTTGTTG 20  
\*||||||\*||||:||:|  
Sbjct: 854 CCGAGAACTACGACGACGAC 835  
>novel\_mir\_124 Score: 1.8 R03G\_12391  
Query: 1 TGCTCTTGTTGCTGTTGTTG 20  
||||\*|||||||:||:|  
Sbjct: 815 ACGACAACAACGACGACGAC 796  
>novel\_mir\_124 Score: 2.2 R03G\_12391  
Query: 1 TGCTCTTGTTGCTGTTGTTG 20  
||\*|||:|||||||  
Sbjct: 791 ACAACAACAACGACAACGAC 772  
>novel\_mir\_124 Score: 1.5 R03G\_11135  
Query: 1 TGCTCTTGTTGCTGTTGTTG 20  
||\*||||:|||||||  
Sbjct: 554 ACAAGAACGACGACAACAAC 535  
>novel\_mir\_124 Score: 2.0 R03G\_11158  
Query: 1 TGCTCTTGTTGCTGTTGTTG 20  
||||\*||||\*|||||  
Sbjct: 62 ACGACAACAACAACAACAAC 43  
>novel\_mir\_124 Score: 1.0 R03G\_11219  
Query: 1 TGCTCTTGTTGCTGTTGTTG 20  
||||\*|||||||  
Sbjct: 1784 ACGACAACAACGACAACAAC 1765  
>novel\_mir\_124 Score: 2.5 R03G\_11398  
Query: 1 TGCTCTTGTTGCTGTTGTTG 20  
\*||\*|||  
Sbjct: 92 CCCATAACAACGACAACAAC 73  
>novel\_mir\_124 Score: 1.8 R03G\_11543  
Query: 1 TGCTCTTGTTGCTGTTGTTG 20

||||\*:|||||||:||  
Sbjct: 368 ACGACGACAACGACAACGAC 349  
>novel\_mir\_124 Score: 2.2 R03G\_11614  
Query: 1 TGCTCTTGTTGCTGTTGTTG 20  
||||\*:|||||||:||:||  
Sbjct: 107 ACGACGACAACGACGACGAC 88  
>novel\_mir\_124 Score: 1.8 R03G\_11678  
Query: 1 TGCTCTTGTTGCTGTTGTTG 20  
||||\*:|||||||:||  
Sbjct: 869 ACGACGACAACGACAACGAC 850  
>novel\_mir\_124 Score: 2.0 R03G\_11678  
Query: 1 TGCTCTTGTTGCTGTTGTTG 20  
||\*|||\*|||||||  
Sbjct: 839 ACAACAACAACGACAACAAC 820  
>novel\_mir\_124 Score: 2.0 R03G\_11763  
Query: 1 TGCTCTTGTTGCTGTTGTTG 20  
|\*|||\*|||||||  
Sbjct: 89 AGAAGAACAACGACAACAAC 70  
>novel\_mir\_124 Score: 2.2 R03G\_11840  
Query: 1 TGCTCTTGTTGCTGTTGTTG 20  
\*||||:||:|||||||:|\*  
Sbjct: 579 TCGAGGACGACGACAACGAA 560  
>novel\_mir\_124 Score: 2.0 R03G\_11865  
Query: 1 TGCTCTTGTTGCTGTTGTTG 20  
||||\*|||||\*|||||||  
Sbjct: 371 ACGACAACAACAACAACAAC 352  
>novel\_mir\_124 Score: 2.2 R03G\_11865  
Query: 1 TGCTCTTGTTGCTGTTGTTG 20  
||\*|||\*|||||||:||  
Sbjct: 350 ACAACAACAACGACAACGAC 331  
>novel\_mir\_124 Score: 2.5 R03G\_11868  
Query: 1 TGCTCTTGTTGCTGTTGTTG 20  
||||\*:||:|||||:|||||  
Sbjct: 1664 ACGACGACGACGACGACAAC 1645  
>novel\_mir\_124 Score: 2.0 R03G\_11868  
Query: 1 TGCTCTTGTTGCTGTTGTTG 20  
||||\*|||||\*|||||||  
Sbjct: 869 ACGACAACAACAACAACAAC 850  
>novel\_mir\_124 Score: 2.5 R03G\_11915  
Query: 1 TGCTCTTGTTGCTGTTGTTG 20  
|:\*|||||||\*|||||||  
Sbjct: 1058 ATAAGAACAACAACAACAAC 1039  
>novel\_mir\_124 Score: 2.2 R03G\_10269  
Query: 1 TGCTCTTGTTGCTGTTGTTG 20  
\*\*|||||:|||||||:||



Sbjct: 974 TAGAGAACGACGACAACGAC 955  
>novel\_mir\_124 Score: 2.5 R03G\_10319  
Query: 1 TGCTCTTGTTGCTGTTGTTG 20  
\*|||\*|||\*|||||||  
Sbjct: 392 CCGACAACACTACGACAACAAC 373  
>novel\_mir\_124 Score: 2.0 R03G\_10396  
Query: 1 TGCTCTTGTTGCTGTTGTTG 20  
||||\*|||||\*|||||||  
Sbjct: 419 ACGACAACAACAACAACAAC 400  
>novel\_mir\_124 Score: 1.2 R03G\_10399  
Query: 1 TGCTCTTGTTGCTGTTGTTG 20  
\*|||||||:|:|  
Sbjct: 440 CCGAGAACAACGACGACGAC 421  
>novel\_mir\_124 Score: 2.2 R03G\_10399  
Query: 1 TGCTCTTGTTGCTGTTGTTG 20  
||||\*|||||\*|||||:|  
Sbjct: 419 ACGACAACAACAACAACGAC 400  
>novel\_mir\_124 Score: 2.0 R03G\_10399  
Query: 1 TGCTCTTGTTGCTGTTGTTG 20  
||||\*|||||\*|||||||  
Sbjct: 383 ACGACAACAACAACAACAAC 364  
>novel\_mir\_124 Score: 2.5 R03G\_10401  
Query: 1 TGCTCTTGTTGCTGTTGTTG 20  
:\*|\*|||||||:|  
Sbjct: 3611 GAGCGAACAACGACAACGAC 3592  
>novel\_mir\_124 Score: 2.5 R03G\_10458  
Query: 1 TGCTCTTGTTGCTGTTGTTG 20  
||||\*|:|||||||\*|\*  
Sbjct: 107 ACGACGACAACGACAACCAA 88  
>novel\_mir\_124 Score: 1.5 R03G\_10494  
Query: 1 TGCTCTTGTTGCTGTTGTTG 20  
||||\*|:|||||||  
Sbjct: 710 ACGACGACAACGACAACAAC 691  
>novel\_mir\_124 Score: 2.2 R03G\_10494  
Query: 1 TGCTCTTGTTGCTGTTGTTG 20  
||\*|\*|||||||:|  
Sbjct: 680 ACAACAACAACGACAACGAC 661  
>novel\_mir\_124 Score: 1.8 R03G\_10494  
Query: 1 TGCTCTTGTTGCTGTTGTTG 20  
||||\*|:|||||||:|  
Sbjct: 641 ACGACGACAACGACAACGAC 622  
>novel\_mir\_124 Score: 2.0 R03G\_10494  
Query: 1 TGCTCTTGTTGCTGTTGTTG 20  
||||\*|||||\*|||||||  
Sbjct: 47 ACGACAACAACAACAACAAC 28

>novel\_mir\_124 Score: 2.5 R03G\_10589  
Query: 1 TGCTCTTGTTGCTGTTGTTG 20  
||||\*||:|:|||||:|:  
Sbjct: 577 ACGAGCACGATGACAACGAT 558  
>novel\_mir\_124 Score: 2.2 R03G\_10636  
Query: 1 TGCTCTTGTTGCTGTTGTTG 20  
||||\*||||\*||||||:|  
Sbjct: 530 ACGACAACACCGACAACGAC 511  
>novel\_mir\_124 Score: 0.0 R03G\_10737  
Query: 1 TGCTCTTGTTGCTGTTGTTG 20  
|||||||  
Sbjct: 338 ACGAGAACAACGACAACAAC 319  
>novel\_mir\_124 Score: 2.5 R03G\_10815  
Query: 1 TGCTCTTGTTGCTGTTGTTG 20  
||||\*:||||\*|||||||  
Sbjct: 2768 ACGACGACAACAACAACAAC 2749  
>novel\_mir\_124 Score: 1.8 R03G\_10815  
Query: 1 TGCTCTTGTTGCTGTTGTTG 20  
||||\*|||||||:|:|  
Sbjct: 2612 ACGACAACAACGACGACGAC 2593  
>novel\_mir\_124 Score: 2.0 R03G\_10815  
Query: 1 TGCTCTTGTTGCTGTTGTTG 20  
||||\*|||||\*|||||||  
Sbjct: 2588 ACGACAACAACAACAACAAC 2569  
>novel\_mir\_124 Score: 2.0 R03G\_10815  
Query: 1 TGCTCTTGTTGCTGTTGTTG 20  
||||\*|||:|||||:|||||  
Sbjct: 2567 ACGACAACGACGACGACAAC 2548  
>novel\_mir\_124 Score: 1.8 R03G\_10815  
Query: 1 TGCTCTTGTTGCTGTTGTTG 20  
||||\*|||||||:|:|  
Sbjct: 2012 ACGACAACAACGACGACGAC 1993  
>novel\_mir\_124 Score: 2.2 R03G\_10831  
Query: 1 TGCTCTTGTTGCTGTTGTTG 20  
||||\*||:|||||||:|  
Sbjct: 1106 ACGACGACGACGACAACGAC 1087  
>novel\_mir\_124 Score: 2.2 R03G\_10831  
Query: 1 TGCTCTTGTTGCTGTTGTTG 20  
||||\*|||||\*|||||:|  
Sbjct: 62 ACGACAACAACAACAACGAC 43  
>novel\_mir\_124 Score: 2.2 R03G\_10848  
Query: 1 TGCTCTTGTTGCTGTTGTTG 20  
||||\*|||||\*|||||:|  
Sbjct: 2045 ACGACAACAACAACAACGAC 2026  
>novel\_mir\_124 Score: 2.0 R03G\_10851

Query: 1 TGCTCTTGTTGCTGTTGTTG 20  
||||\*|||||\*|||||||  
Sbjct: 344 ACGACAACAACAACAAC 325  
>novel\_mir\_124 Score: 1.8 R03G\_10883  
Query: 1 TGCTCTTGTTGCTGTTGTTG 20  
||||\*:|||||||:|  
Sbjct: 1778 ACGACGACAACGACAACGAC 1759  
>novel\_mir\_124 Score: 2.5 R03G\_10931  
Query: 1 TGCTCTTGTTGCTGTTGTTG 20  
||\*|\*:|||||||  
Sbjct: 410 ACAACGACAACGACAACAAC 391  
>novel\_mir\_124 Score: 2.0 R03G\_10935  
Query: 1 TGCTCTTGTTGCTGTTGTTG 20  
||||\*|||:|||||:||||  
Sbjct: 1337 ACGACAACGACGACGACAAC 1318  
>novel\_mir\_124 Score: 2.0 R03G\_10995  
Query: 1 TGCTCTTGTTGCTGTTGTTG 20  
||||\*|||||\*|||||||  
Sbjct: 1688 ACGACAACAACAACAAC 1669  
>novel\_mir\_124 Score: 2.0 R03G\_10995  
Query: 1 TGCTCTTGTTGCTGTTGTTG 20  
||\*|\*|||||||  
Sbjct: 1664 ACAACAACAACGACAACAAC 1645  
>novel\_mir\_124 Score: 1.5 R03G\_10995  
Query: 1 TGCTCTTGTTGCTGTTGTTG 20  
|||||:||||\*|||||||  
Sbjct: 1442 ACGAGAGCAACAACAACAAC 1423  
>novel\_mir\_124 Score: 2.5 R03G\_09290  
Query: 1 TGCTCTTGTTGCTGTTGTTG 20  
||\*|\*||:|||||||  
Sbjct: 189 ACAACAATAACGACAACAAC 170  
>novel\_mir\_124 Score: 2.5 R03G\_09422  
Query: 1 TGCTCTTGTTGCTGTTGTTG 20  
||||\*:||||\*|||||||  
Sbjct: 2687 ACGACGACAACAACAACAAC 2668  
>novel\_mir\_124 Score: 2.2 R03G\_09497  
Query: 1 TGCTCTTGTTGCTGTTGTTG 20  
||||\*|||:|||||:|:|  
Sbjct: 74 ACGACAACGACGACGACGAC 55  
>novel\_mir\_124 Score: 2.2 R03G\_09557  
Query: 1 TGCTCTTGTTGCTGTTGTTG 20  
:||||\*|||||\*|||||||  
Sbjct: 3554 GCGACAACAACAACAACAAC 3535  
>novel\_mir\_124 Score: 2.5 R03G\_09557  
Query: 1 TGCTCTTGTTGCTGTTGTTG 20

\*|||\*|||\*|||  
Sbjct: 1757 CCGACAACACCGACAACAAC 1738  
>novel\_mir\_124 Score: 2.5 R03G\_09692  
Query: 1 TGCTCTTGTTGCTGTTGTTG 20  
\*|||\*|||\*|||  
Sbjct: 3578 CCGAGAAAAACAACAACAAC 3559  
>novel\_mir\_124 Score: 2.0 R03G\_09692  
Query: 1 TGCTCTTGTTGCTGTTGTTG 20  
|||\*|||\*|||  
Sbjct: 420 ACGACAACAACGACATCAAC 401  
>novel\_mir\_124 Score: 2.0 R03G\_09721  
Query: 1 TGCTCTTGTTGCTGTTGTTG 20  
|||\*|||\*|||  
Sbjct: 608 ACGACAACAACAACAACAAC 589  
>novel\_mir\_124 Score: 2.0 R03G\_09758  
Query: 1 TGCTCTTGTTGCTGTTGTTG 20  
|||\*|||\*|||  
Sbjct: 1157 ACGACAACAACAACAACAAC 1138  
>novel\_mir\_124 Score: 2.5 R03G\_09763  
Query: 1 TGCTCTTGTTGCTGTTGT-TG 20  
|\*\*|||\*|||\*|||  
Sbjct: 350 AGAAGAACAACGACAACAGAC 330  
>novel\_mir\_124 Score: 2.5 R03G\_09776  
Query: 1 TGCTCTTGTTGCTGTTGTTG 20  
\*|||\*|||\*|||  
Sbjct: 758 TCGACAACAACAACAACAAC 739  
>novel\_mir\_124 Score: 1.0 R03G\_09793  
Query: 1 TGCTCTTGTTGCTGTTGTTG 20  
|||\*|||\*|||  
Sbjct: 455 ACGACAACAACGACAACAAC 436  
>novel\_mir\_124 Score: 1.8 R03G\_09884  
Query: 1 TGCTCTTGTTGCTGTTGTTG 20  
|||\*|||\*|||\*|||  
Sbjct: 275 ACGAGAACGACGACGACGAG 256  
>novel\_mir\_124 Score: 2.0 R03G\_09894  
Query: 1 TGCTCTTGTTGCTGTTGTTG 20  
||\*|||\*|||\*|||  
Sbjct: 2000 ACAAGAACAACAACAACAAC 1981  
>novel\_mir\_124 Score: 2.5 R03G\_09990  
Query: 1 TGCTCTTGTTGCTGTTGTTG 20  
||\*|||\*|||\*|||\*|||  
Sbjct: 944 ACAACAACAACGACAACGGC 925  
>novel\_mir\_124 Score: 1.8 R03G\_10043  
Query: 1 TGCTCTTGTTGCTGTTGTTG 20  
|||\*|||\*|||\*|||

Sbjct: 362 ACGACGACAACGACAACGAC 343  
>novel\_mir\_124 Score: 0.0 R03G\_10048  
Query: 1 TGCTCTTGTTGCTGTTGTTG 20  
|||||

Sbjct: 338 ACGAGAACAACGACAACAAC 319  
>novel\_mir\_124 Score: 2.5 R03G\_10202  
Query: 1 TGCTCTTGTTGCTGTTGTTG 20  
\*|||||\*\*|||||

Sbjct: 938 TCGAGAAGTACGACAACAAC 919  
>novel\_mir\_124 Score: 2.5 R03G\_10202  
Query: 1 TGCTCTTGTTGCTGTTGTTG 20  
||||\*:\*|||

Sbjct: 785 ACGACGACCACGACAACAAC 766  
>novel\_mir\_124 Score: 2.5 R03G\_08100  
Query: 1 TGCTCTTGTTGCTGTTGTTG 20  
||||\*:\*|||

Sbjct: 29 ACGACGACAACGACGACAAG 10  
>novel\_mir\_124 Score: 1.0 R03G\_08120  
Query: 1 TGCTCTTGTTGCTGTTGTTG 20  
||||\*|||

Sbjct: 1100 ACGACAACAACGACAACAAC 1081  
>novel\_mir\_124 Score: 2.0 R03G\_08194  
Query: 1 TGCTCTTGTTGCTGTTGTTG 20  
||||\*|||

Sbjct: 2162 ACGACAACAACAACAACAAC 2143  
>novel\_mir\_124 Score: 2.5 R03G\_08408  
Query: 1 TGCTCTTGTTGCTGTTGTTG 20  
|\*||\*|:|||||

Sbjct: 767 AGGACAGCAACGACAACAAC 748  
>novel\_mir\_124 Score: 2.0 R03G\_08516  
Query: 1 TGCTCTTGTTGCTGTTGTTG 20  
||||\*:\*|||

Sbjct: 89 ACGACGACGACGACAACAAC 70  
>novel\_mir\_124 Score: 1.5 R03G\_08547  
Query: 1 TGCTCTTGTTGCTGTTGTTG 20  
||||\*|||

Sbjct: 272 ACGACAACGACGACAACAAC 253  
>novel\_mir\_124 Score: 2.0 R03G\_08547  
Query: 1 TGCTCTTGTTGCTGTTGTTG 20  
||||\*|||

Sbjct: 245 ACGACAACAACAACAACAAC 226  
>novel\_mir\_124 Score: 2.5 R03G\_08576  
Query: 1 TGCTCTTGTTGCTGTTGTTG 20  
||||\*|||

Sbjct: 274 ACGATAACAATGATAAC-AC 256



Query: 1 TGCTCTTGTTGCTGTTGTTG 20  
||||\*:||:|||||||  
Sbjct: 131 ACGACGACGACGACAACAAC 112  
>novel\_mir\_124 Score: 2.2 R03G\_08870  
Query: 1 TGCTCTTGTTGCTGTTGTTG 20  
||\*|||:|||||||  
Sbjct: 362 ACAACAACAACGACAACGAC 343  
>novel\_mir\_124 Score: 1.8 R03G\_08882  
Query: 1 TGCTCTTGTTGCTGTTGTTG 20  
||||\*|||:|||||||:||  
Sbjct: 4175 ACGACAACGACGACAACGAC 4156  
>novel\_mir\_124 Score: 2.0 R03G\_08883  
Query: 1 TGCTCTTGTTGCTGTTGTTG 20  
||||\*||||\*|||||||  
Sbjct: 596 ACGACAACAACAACAACAAC 577  
>novel\_mir\_124 Score: 2.0 R03G\_08982  
Query: 1 TGCTCTTGTTGCTGTTGTTG 20  
||||\*:||:|||||||  
Sbjct: 209 ACGACGACGACGACAACAAC 190  
>novel\_mir\_124 Score: 2.5 R03G\_08982  
Query: 1 TGCTCTTGTTGCTGTTGTTG 20  
||||\*:||:|||||||\*|  
Sbjct: 101 ACGACGACGACGACAACACC 82  
>novel\_mir\_124 Score: 2.0 R03G\_08982  
Query: 1 TGCTCTTGTTGCTGTTGTTG 20  
||||\*:|||||||:|||||  
Sbjct: 80 ACGACGACAACGACGACAAC 61  
>novel\_mir\_124 Score: 2.5 R03G\_09029  
Query: 1 TGCTCTTGTTGCTGTTGTTG 20  
||||\*:||:|||||:|||||  
Sbjct: 2351 ACGACGACGACGACGACAAC 2332  
>novel\_mir\_124 Score: 1.0 R03G\_09037  
Query: 1 TGCTCTTGTTGCTGTTGTTG 20  
||||\*|||||||  
Sbjct: 764 ACGACAACAACGACAACAAC 745  
>novel\_mir\_124 Score: 2.0 R03G\_09085  
Query: 1 TGCTCTTGTTGCTGTTGTTG 20  
||||\*||||\*|||||||  
Sbjct: 857 ACGACAACAACAACAACAAC 838  
>novel\_mir\_124 Score: 1.5 R03G\_09085  
Query: 1 TGCTCTTGTTGCTGTTGTTG 20  
||||\*|||||||:|||||  
Sbjct: 800 ACGACAACAACGACGACAAC 781  
>novel\_mir\_124 Score: 1.0 R03G\_09085  
Query: 1 TGCTCTTGTTGCTGTTGTTG 20

||||\*|||||||  
Sbjct: 776 ACGACAACAACGACAACAAC 757  
>novel\_mir\_124 Score: 2.5 R03G\_09111  
Query: 1 TGCTCTTGTTGCTGTTGTTG 20  
||||\*:||||:|||||||:  
Sbjct: 2032 ACGACGACAATGACAACAGT 2013  
>novel\_mir\_124 Score: 0.0 R03G\_09184  
Query: 1 TGCTCTTGTTGCTGTTGTTG 20  
|||||||  
Sbjct: 50 ACGAGAACAACGACAACAAC 31  
>novel\_mir\_124 Score: 2.2 R03G\_06990  
Query: 1 TGCTCTTGTTGCTGTTGTTG 20  
||||\*:|||||||:  
Sbjct: 302 ACGACGACAACGACAACGGT 283  
>novel\_mir\_124 Score: 2.0 R03G\_07012  
Query: 1 TGCTCTTGTTGCTGTTGTTG 20  
||||\*|||||\*|||||  
Sbjct: 599 ACGACAACAACAACAACAAC 580  
>novel\_mir\_124 Score: 2.5 R03G\_07013  
Query: 1 TGCTCTTGTTGCTGTTGTTG 20  
||\*|||||:||||\*|||||  
Sbjct: 1076 ACAAGAACGACGAAAACAAC 1057  
>novel\_mir\_124 Score: 1.5 R03G\_07091  
Query: 1 TGCTCTTGTTGCTGTTGTTG 20  
||||\*|||||||:|||||  
Sbjct: 608 ACGACAACAACGACGACAAC 589  
>novel\_mir\_124 Score: 0.0 R03G\_07115  
Query: 1 TGCTCTTGTTGCTGTTGTTG 20  
|||||||  
Sbjct: 299 ACGAGAACAACGACAACAAC 280  
>novel\_mir\_124 Score: 2.5 R03G\_07164  
Query: 1 TGCTCTTGTTGCTGTTGTTG 20  
:|||\*|||||\*|||||:  
Sbjct: 3017 GCGACAACAACAACAACGAC 2998  
>novel\_mir\_124 Score: 1.8 R03G\_07164  
Query: 1 TGCTCTTGTTGCTGTTGTTG 20  
\*|||\*|||||||:||  
Sbjct: 1979 TCGACAACAACGACAACGAC 1960  
>novel\_mir\_124 Score: 2.0 R03G\_07164  
Query: 1 TGCTCTTGTTGCTGTTGTTG 20  
||||\*:|||||||\*|  
Sbjct: 638 ACGACGACAACGACAACACC 619  
>novel\_mir\_124 Score: 2.5 R03G\_07164  
Query: 1 TGCTCTTGTTGCTGTTGTTG 20  
\*|\*:||||:|||||||



Sbjct: 65 TCTGGAACGACGACAACAAC 46  
>novel\_mir\_124 Score: 2.2 R03G\_07234  
Query: 1 TGCTCTTGTTGCTGTTGTTG 20  
||||\*:||:|||||||:||  
Sbjct: 308 ACGACGACGACGACAACGAC 289  
>novel\_mir\_124 Score: 2.5 R03G\_07281  
Query: 1 TGCTCTTGTTGCTGTTGTTG 20  
||||\*|||||\*||:|||||  
Sbjct: 393 ACGAAAACAACAACGACAAC 374  
>novel\_mir\_124 Score: 2.0 R03G\_07466  
Query: 1 TGCTCTTGTTGCTGTTGTTG 20  
||||\*|||||\*|||||||  
Sbjct: 1748 ACGACAACAACAACAACAAC 1729  
>novel\_mir\_124 Score: 2.2 R03G\_07589  
Query: 1 TGCTCTTGTTGCTGTTGTTG 20  
||||\*:|||||||\*||\*:  
Sbjct: 326 ACGACGACAACGACAACATT 307  
>novel\_mir\_124 Score: 1.8 R03G\_07615  
Query: 1 TGCTCTTGTTGCTGTTGTTG 20  
||||\*:|||||||\*||:||  
Sbjct: 707 ACGACGACAACGACAACGAC 688  
>novel\_mir\_124 Score: 1.5 R03G\_07615  
Query: 1 TGCTCTTGTTGCTGTTGTTG 20  
||||\*|||||||\*||:|||||  
Sbjct: 611 ACGACAACAACGACGACAAC 592  
>novel\_mir\_124 Score: 2.0 R03G\_07652  
Query: 1 TGCTCTTGTTGCTGTTGTTG 20  
||||\*:|||||||\*||\*  
Sbjct: 1142 ACGACGACAACGACAACAAG 1123  
>novel\_mir\_124 Score: 1.8 R03G\_07692  
Query: 1 TGCTCTTGTTGCTGTTGTTG 20  
||||\*:|||||||\*||:||  
Sbjct: 302 ACGACGACAACGACAACGAC 283  
>novel\_mir\_124 Score: 2.5 R03G\_07749  
Query: 1 TGCTCTTGTTGCTGTTGTTG 20  
\*:\*:|||||||\*||\*  
Sbjct: 260 TTCGGAACAACGACAACAAC 241  
>novel\_mir\_124 Score: 2.5 R03G\_07795  
Query: 1 TGCTCTTGTTGCTGTTGTTG 20  
||||\*|||||\*||:|||||||  
Sbjct: 70 ACGACAACAATAACAACAAC 51  
>novel\_mir\_124 Score: 1.2 R03G\_07798  
Query: 1 TGCTCTTGTTGCTGTTGTTG 20  
||||\*|||||||\*||:||  
Sbjct: 794 ACGACAACAACGACAACGAC 775

>novel\_mir\_124 Score: 1.0 R03G\_07806  
Query: 1 TGCTCTTGTTGCTGTTGTTG 20  
||||\*|||||||  
Sbjct: 425 ACGACAACAACGACAACAAC 406

>novel\_mir\_124 Score: 1.8 R03G\_07806  
Query: 1 TGCTCTTGTTGCTGTTGTTG 20  
||||\*:|||||||:|  
Sbjct: 392 ACGACGACAACGACAACGAC 373

>novel\_mir\_124 Score: 2.5 R03G\_07916  
Query: 1 TGCTCTTGTTGCTGTTGTTG 20  
||\*|\*:|||||||  
Sbjct: 776 ACAACGACAACGACAACAAC 757

>novel\_mir\_124 Score: 2.0 R03G\_07933  
Query: 1 TGCTCTTGTTGCTGTTGTTG 20  
||||\*|||||\*|||||||  
Sbjct: 425 ACGACAACAACAACAACAAC 406

>novel\_mir\_124 Score: 2.2 R03G\_07933  
Query: 1 TGCTCTTGTTGCTGTTGTTG 20  
||\*|\*|||||||:|  
Sbjct: 401 ACAACAACAACGACAACGAC 382

>novel\_mir\_124 Score: 1.8 R03G\_07933  
Query: 1 TGCTCTTGTTGCTGTTGTTG 20  
||||\*:|||||||:|  
Sbjct: 356 ACGACGACAACGACAACGAC 337

>novel\_mir\_124 Score: 2.0 R03G\_07933  
Query: 1 TGCTCTTGTTGCTGTTGTTG 20  
||||\*|||||\*|||||||  
Sbjct: 335 ACGACAACAACAACAACAAC 316

>novel\_mir\_124 Score: 1.2 R03G\_07939  
Query: 1 TGCTCTTGTTGCTGTTGTTG 20  
||||\*|||||||:|  
Sbjct: 1415 ACGACAACAACGACAACGAC 1396

>novel\_mir\_124 Score: 2.5 R03G\_07939  
Query: 1 TGCTCTTGTTGCTGTTGTTG 20  
||\*|||||:|||||:||||\*  
Sbjct: 179 ACAAGAACGACGACGACAAG 160

>novel\_mir\_124 Score: 2.0 R03G\_07958  
Query: 1 TGCTCTTGTTGCTGTTGTTG 20  
||||\*|||:|||||||:|  
Sbjct: 1296 ACGACAACGACGACAACGGC 1277

>novel\_mir\_124 Score: 2.2 R03G\_05532  
Query: 1 TGCTCTTGTTGCTGTTGTTG 20  
:|\*\*|||||||  
Sbjct: 98 GCTCGAACAACGACAACAAC 79

>novel\_mir\_124 Score: 2.0 R03G\_05582

Query: 1 TGCTCTTGTTGCTGTTGTTG 20  
||||\*:||:|||||||  
Sbjct: 791 ACGACGACGACGACAACAAC 772  
>novel\_mir\_124 Score: 1.0 R03G\_05642  
Query: 1 TGCTCTTGTTGCTGTTGTTG 20  
||||\*|||||||  
Sbjct: 1271 ACGACAACAACGACAACAAC 1252  
>novel\_mir\_124 Score: 2.0 R03G\_05657  
Query: 1 TGCTCTTGTTGCTGTTGTTG 20  
\*||||\*||:|||||||  
Sbjct: 89 TCGACAACGACGACAACAAC 70  
>novel\_mir\_124 Score: 2.5 R03G\_05657  
Query: 1 TGCTCTTGTTGCTGTTGTTG 20  
||||\*||||\*||:|||||  
Sbjct: 68 ACGACAACAACAACGACAAC 49  
>novel\_mir\_124 Score: 2.0 R03G\_05730  
Query: 1 TGCTCTTGTTGCTGTTGTTG 20  
||||\*||:||||||:|||||  
Sbjct: 676 ACGACAGCAACGACGACAAC 657  
>novel\_mir\_124 Score: 2.2 R03G\_05806  
Query: 1 TGCTCTTGTTGCTGTTGTTG 20  
:|||||:|:|||||:|||:  
Sbjct: 3943 GCGAGAGCGACGACGACAGT 3924  
>novel\_mir\_124 Score: 1.2 R03G\_05906  
Query: 1 TGCTCTTGTTGCTGTTGTTG 20  
||||\*|||||||:||  
Sbjct: 305 ACGACAACAACGACAACGAC 286  
>novel\_mir\_124 Score: 0.0 R03G\_05910  
Query: 1 TGCTCTTGTTGCTGTTGTTG 20  
|||||||  
Sbjct: 338 ACGAGAACAACGACAACAAC 319  
>novel\_mir\_124 Score: 0.0 R03G\_05955  
Query: 1 TGCTCTTGTTGCTGTTGTTG 20  
|||||||  
Sbjct: 338 ACGAGAACAACGACAACAAC 319  
>novel\_mir\_124 Score: 1.8 R03G\_06121  
Query: 1 TGCTCTTGTTGCTGTTGTTG 20  
||||\*||:||||||:||  
Sbjct: 740 ACGACAACGACGACAACGAC 721  
>novel\_mir\_124 Score: 1.8 R03G\_06121  
Query: 1 TGCTCTTGTTGCTGTTGTTG 20  
||||\*|||||||:|:  
Sbjct: 707 ACGAAAACAACGACAACGGT 688  
>novel\_mir\_124 Score: 2.0 R03G\_06147  
Query: 1 TGCTCTTGTTGCTGTTGTTG 20

||||\*|||||\*|||||||  
Sbjct: 866 ACGACAACAACAACAAC 847  
>novel\_mir\_124 Score: 2.5 R03G\_06225  
Query: 1 TGCTCTTGTTGCTGTTGTTG 20  
||\*|||:|||||||  
Sbjct: 4625 ACAACAACGACGACAACAAC 4606  
>novel\_mir\_124 Score: 2.5 R03G\_06238  
Query: 1 TGCTCTTGTTGCTGTTGTTG 20  
||||\*:||:||||:||||  
Sbjct: 749 ACGACGACGACGACGACAAC 730  
>novel\_mir\_124 Score: 2.0 R03G\_06266  
Query: 1 TGCTCTTGTTGCTGTTGTTG 20  
|||||||\*||:||\*||  
Sbjct: 140 ACGAGAACAACAACGACTAC 121  
>novel\_mir\_124 Score: 2.5 R03G\_06268  
Query: 1 TGCTCTTGTTGCTGTTGTTG 20  
||||\*|||:\*|||||||  
Sbjct: 736 ACGACAACGCCGACAACAAC 717  
>novel\_mir\_124 Score: 2.5 R03G\_06268  
Query: 1 TGCTCTTGTTGCTGTTGTTG 20  
||||\*|||:\*|||||||  
Sbjct: 709 ACGACAACGCCGACAACAAC 690  
>novel\_mir\_124 Score: 2.5 R03G\_06268  
Query: 1 TGCTCTTGTTGCTGTTGTTG 20  
||||\*|||||\*||:||||  
Sbjct: 667 ACGACAACAACAACGACAAC 648  
>novel\_mir\_124 Score: 2.0 R03G\_06268  
Query: 1 TGCTCTTGTTGCTGTTGTTG 20  
||||\*|||:||||:||||  
Sbjct: 622 ACGACAACGACGACGACAAC 603  
>novel\_mir\_124 Score: 2.5 R03G\_06452  
Query: 1 TGCTCTTGTTGCTGTTGTTG 20  
||\*|||:|||||||  
Sbjct: 1688 ACAACAACGACGACAACAAC 1669  
>novel\_mir\_124 Score: 2.5 R03G\_06473  
Query: 1 TGCTCTTGTTGCTGTTGTTG 20  
||\*\*:|||||||  
Sbjct: 2618 ACAACGACAACGACAACAAC 2599  
>novel\_mir\_124 Score: 2.0 R03G\_06473  
Query: 1 TGCTCTTGTTGCTGTTGTTG 20  
||||\*|||||\*|||||||  
Sbjct: 1061 ACGACAACAACAACAACAAC 1042  
>novel\_mir\_124 Score: 2.0 R03G\_06473  
Query: 1 TGCTCTTGTTGCTGTTGTTG 20  
||||\*|||||\*|||||||

Sbjct: 1025 ACGACAACAACAACAAC 1006  
>novel\_mir\_124 Score: 2.5 R03G\_06483  
Query: 1 TGCTCTTGTTGCTGTTGTTG 20  
||||\*|||||||\*|:||||  
Sbjct: 613 ACGATAACAACGAAAGCAAC 594  
>novel\_mir\_124 Score: 1.0 R03G\_06550  
Query: 1 TGCTCTTGTTGCTGTTGTTG 20  
||||\*|||||||  
Sbjct: 1379 ACGACAACAACGACAACAAC 1360  
>novel\_mir\_124 Score: 2.5 R03G\_06599  
Query: 1 TGCTCTTGTTGCTGTTGTTG 20  
||||\*||:|||||||\*||  
Sbjct: 398 ACGACGACGACGACAACACTAC 379  
>novel\_mir\_124 Score: 2.2 R03G\_06612  
Query: 1 TGCTCTTGTTGCTGTTGTTG 20  
|||||:||:||||||\*||:|  
Sbjct: 1422 ACGAGGACGACGACACCAGC 1403  
>novel\_mir\_124 Score: 2.0 R03G\_06631  
Query: 1 TGCTCTTGTTGCTGTTGTTG 20  
||\*|\*|||||||  
Sbjct: 3017 ACAACAACAACGACAACAAC 2998  
>novel\_mir\_124 Score: 2.2 R03G\_06631  
Query: 1 TGCTCTTGTTGCTGTTGTTG 20  
||||\*||:|||||||:||  
Sbjct: 2975 ACGACGACGACGACAACGAC 2956  
>novel\_mir\_124 Score: 1.5 R03G\_06665  
Query: 1 TGCTCTTGTTGCTGTTGTTG 20  
||||\*|||||||  
Sbjct: 737 ACGACGACAACGACAACAAC 718  
>novel\_mir\_124 Score: 1.5 R03G\_04228  
Query: 1 TGCTCTTGTTGCTGTTGTTG 20  
||||\*|||||||  
Sbjct: 434 ACGACGACAACGACAACAAC 415  
>novel\_mir\_124 Score: 2.2 R03G\_04228  
Query: 1 TGCTCTTGTTGCTGTTGTTG 20  
||\*|\*|||||||:||  
Sbjct: 215 ACAACAACAACGACAACGAC 196  
>novel\_mir\_124 Score: 2.0 R03G\_04258  
Query: 1 TGCTCTTGTTGCTGTTGTTG 20  
|\*|\*|||||||  
Sbjct: 1773 AAGATAACAACGACAACAAC 1754  
>novel\_mir\_124 Score: 2.5 R03G\_04261  
Query: 1 TGCTCTTGTTGCTGTTGTTG 20  
\*|\*||\*|\*|||||||  
Sbjct: 587 CCAAGACCAACGACAACAAC 568

>novel\_mir\_124 Score: 2.2 R03G\_04305  
Query: 1 TGCTCTTGTTGCTGTTGTTG 20  
|||\*|||\*|||:|  
Sbjct: 827 ACGACAACAACAACGAC 808  
>novel\_mir\_124 Score: 2.2 R03G\_04335  
Query: 1 TGCTCTTGTTGCTGTTGTTG 20  
||\*|||\*|||:|  
Sbjct: 712 ACAAGAAGAACGACAACAAT 693  
>novel\_mir\_124 Score: 2.2 R03G\_04444  
Query: 1 TGCTCTTGTTGCTGTTGTTG 20  
|||\*|||\*|||:|  
Sbjct: 1139 ACGACGACAACGACAACACTAT 1120  
>novel\_mir\_124 Score: 1.0 R03G\_04522  
Query: 1 TGCTCTTGTTGCTGTTGTTG 20  
|||\*|||\*|||:|  
Sbjct: 1586 ACGACAACAACGACAACAAC 1567  
>novel\_mir\_124 Score: 2.0 R03G\_04522  
Query: 1 TGCTCTTGTTGCTGTTGTTG 20  
|||\*|||\*|||:|  
Sbjct: 1553 ACGACAACAACAACAACAAC 1534  
>novel\_mir\_124 Score: 1.8 R03G\_04562  
Query: 1 TGCTCTTGTTGCTGTTGTTG 20  
|||\*|||:|||\*|||\*  
Sbjct: 2216 ACGACAACGACGACAACGAC 2197  
>novel\_mir\_124 Score: 2.5 R03G\_04578  
Query: 1 TGCTCTTGTTGCTGTTGTTG 20  
|||:|||\*|||\*  
Sbjct: 240 ACGGAACAATGACCACAAA 221  
>novel\_mir\_124 Score: 2.5 R03G\_04604  
Query: 1 TGCTCTTGTTGCTGTTGTTG 20  
|||\*|||:|||\*  
Sbjct: 151 ACGACGACGACGACGACAAC 132  
>novel\_mir\_124 Score: 2.0 R03G\_04640  
Query: 1 TGCTCTTGTTGCTGTTGTTG 20  
|||\*|||\*|||:|||\*  
Sbjct: 308 ACGACAACAACGACGACAAG 289  
>novel\_mir\_124 Score: 2.2 R03G\_04831  
Query: 1 TGCTCTTGTTGCTGTTGTTG 20  
|||\*|||\*|||:|||\*  
Sbjct: 1695 ACGACAACAACGATGACGAC 1676  
>novel\_mir\_124 Score: 2.0 R03G\_04845  
Query: 1 TGCTCTTGTTGCTGTTGTTG 20  
|||\*|||\*|||:|||\*  
Sbjct: 339 ACGACAACAACAACAACAAC 320  
>novel\_mir\_124 Score: 1.0 R03G\_04916

Query: 1 TGCTCTTGTTGCTGTTGTTG 20  
||||\*|||||||  
Sbjct: 484 ACGACAACAACGACAACAAC 465  
>novel\_mir\_124 Score: 2.5 R03G\_04947  
Query: 1 TGCTCTTGTTGCTGTTGTTG 20  
||\*||||\*:|||||  
Sbjct: 1082 ACAAGAAGGACGACAACAAC 1063  
>novel\_mir\_124 Score: 2.5 R03G\_05103  
Query: 1 TGCTCTTGTTGCTGTTGTTG 20  
||||\*||||||\*|:||||  
Sbjct: 1031 ACGAAAACAACGTCGACAAC 1012  
>novel\_mir\_124 Score: 2.5 R03G\_05142  
Query: 1 TGCTCTTGTTGCTGTTGT-TG 20  
|||||||:||||\*||||\*\*||  
Sbjct: 5087 ACGAGAACGACGTCAACCTAC 5067  
>novel\_mir\_124 Score: 2.5 R03G\_05142  
Query: 1 TGCTCTTGTTGCTGTTGTTG 20  
||\*|\*|||||||\*  
Sbjct: 4643 ACAACAACAACGACAACAAG 4624  
>novel\_mir\_124 Score: 2.0 R03G\_05178  
Query: 1 TGCTCTTGTTGCTGTTGTTG 20  
||||\*|||\*|||||||  
Sbjct: 626 ACGACAACACTACGACAACAAC 607  
>novel\_mir\_124 Score: 2.0 R03G\_05230  
Query: 1 TGCTCTTGTTGCTGTTGTTG 20  
||||\*||||||\*|||||||  
Sbjct: 3557 ACGACAACAACAACAACAAC 3538  
>novel\_mir\_124 Score: 2.0 R03G\_05308  
Query: 1 TGCTCTTGTTGCTGTTGTTG 20  
||||\*||||||\*|||||||  
Sbjct: 2477 ACGACAACAACAACAACAAC 2458  
>novel\_mir\_124 Score: 2.0 R03G\_05308  
Query: 1 TGCTCTTGTTGCTGTTGTTG 20  
||||\*||||||\*|||||||  
Sbjct: 2450 ACGACAACAACAACAACAAC 2431  
>novel\_mir\_124 Score: 1.8 R03G\_05347  
Query: 1 TGCTCTTGTTGCTGTTGTTG 20  
||||\*:|||||||:||  
Sbjct: 368 ACGACGACAACGACAACGAC 349  
>novel\_mir\_124 Score: 1.0 R03G\_05386  
Query: 1 TGCTCTTGTTGCTGTTGTTG 20  
||||\*|||||||  
Sbjct: 998 ACGACAACAACGACAACAAC 979  
>novel\_mir\_124 Score: 2.0 R03G\_05396  
Query: 1 TGCTCTTGTTGCTGTTGTTG 20

||||\*|||:||||:||||  
Sbjct: 1592 ACGACAACGACGACGACAAC 1573  
>novel\_mir\_124 Score: 1.5 R03G\_05396  
Query: 1 TGCTCTTGTTGCTGTTGTTG 20  
||||\*:|||||||  
Sbjct: 1361 ACGACGACAACGACAACAAC 1342  
>novel\_mir\_124 Score: 2.2 R03G\_05396  
Query: 1 TGCTCTTGTTGCTGTTGTTG 20  
||||\*|||||\*||||:|  
Sbjct: 1334 ACGACAACAACAACAACGAC 1315  
>novel\_mir\_124 Score: 1.5 R03G\_05396  
Query: 1 TGCTCTTGTTGCTGTTGTTG 20  
||||\*:|||||||  
Sbjct: 1301 ACGACGACAACGACAACAAC 1282  
>novel\_mir\_124 Score: 1.8 R03G\_05396  
Query: 1 TGCTCTTGTTGCTGTTGTTG 20  
||\*:|||||||:|  
Sbjct: 986 ACAGGAACAACGACAACGAC 967  
>novel\_mir\_124 Score: 2.5 R03G\_05396  
Query: 1 TGCTCTTGTTGCTGTTGTTG 20  
||\*|\*:|||||||  
Sbjct: 950 ACAACGACAACGACAACAAC 931  
>novel\_mir\_124 Score: 2.0 R03G\_05403  
Query: 1 TGCTCTTGTTGCTGTTGTTG 20  
||||\*|||||\*|||||  
Sbjct: 1424 ACGACAACAACAACAACAAC 1405  
>novel\_mir\_124 Score: 0.0 R03G\_02231  
Query: 1 TGCTCTTGTTGCTGTTGTTG 20  
|||||||  
Sbjct: 338 ACGAGAACAACGACAACAAC 319  
>novel\_mir\_124 Score: 2.0 R03G\_02252  
Query: 1 TGCTCTTGTTGCTGTTGTTG 20  
||||\*|||||\*|||||  
Sbjct: 338 ACGACAACAACAACAACAAC 319  
>novel\_mir\_124 Score: 2.2 R03G\_02307  
Query: 1 TGCTCTTGTTGCTGTTGTTG 20  
\*|||\*|||||||:|:|  
Sbjct: 356 CCGACAACAACGACGACGAC 337  
>novel\_mir\_124 Score: 2.0 R03G\_02434  
Query: 1 TGCTCTTGTTGCTGTTGTTG 20  
||||\*|||||\*|||||  
Sbjct: 239 ACGACAACAACAACAACAAC 220  
>novel\_mir\_124 Score: 1.0 R03G\_02436  
Query: 1 TGCTCTTGTTGCTGTTGTTG 20  
||||\*|||||||



Sbjct: 713 ACGACAACAACGACAACAAC 694  
>novel\_mir\_124 Score: 2.2 R03G\_02518  
Query: 1 TGCTCTTGTTGCTGTTGTTG 20  
||||\*:||:|||||||:||  
Sbjct: 536 ACGACGACGACGACAACGAC 517  
>novel\_mir\_124 Score: 2.0 R03G\_02527  
Query: 1 TGCTCTTGTTGCTGTTGTTG 20  
||\*|||\*|||||  
Sbjct: 998 ACAACAACAACGACAACAAC 979  
>novel\_mir\_124 Score: 2.0 R03G\_02527  
Query: 1 TGCTCTTGTTGCTGTTGTTG 20  
||\*|||||\*|||||  
Sbjct: 923 ACTAGAACAACAACAACAAC 904  
>novel\_mir\_124 Score: 2.5 R03G\_02623  
Query: 1 TGCTCTTGTTGCTGTTGTTG 20  
||\*|||\*|||||\*|||  
Sbjct: 101 ACAACAACAACGACAACACC 82  
>novel\_mir\_124 Score: 2.5 R03G\_02632  
Query: 1 TGCTCTTGTTGCTGTTGTT-G 20  
|\*|||||\*|||||\*|  
Sbjct: 29 AAGAGAACAACAACAACAAGC 9  
>novel\_mir\_124 Score: 2.5 R03G\_02642  
Query: 1 TGCTCTTGTTGCTGTTGTTG 20  
\*|||\*|||\*|||||  
Sbjct: 1031 TCGACAACCACGACAACAAC 1012  
>novel\_mir\_124 Score: 2.0 R03G\_02642  
Query: 1 TGCTCTTGTTGCTGTTGTTG 20  
||||\*|||:|||||:|||||  
Sbjct: 812 ACGACAACGACGACGACAAC 793  
>novel\_mir\_124 Score: 1.8 R03G\_02642  
Query: 1 TGCTCTTGTTGCTGTTGTTG 20  
||||\*|||:|||||||:||  
Sbjct: 485 ACGACAACGACGACAACGAC 466  
>novel\_mir\_124 Score: 2.0 R03G\_02772  
Query: 1 TGCTCTTGTTGCTGTTGTTG 20  
|||||:|||||\*|||||\*  
Sbjct: 1596 ACGAGACAACAACAACAAA 1577  
>novel\_mir\_124 Score: 0.5 R03G\_02782  
Query: 1 TGCTCTTGTTGCTGTTGTTG 20  
|||||||:|||||||  
Sbjct: 494 ACGAGAACGACGACAACAAC 475  
>novel\_mir\_124 Score: 1.8 R03G\_02817  
Query: 1 TGCTCTTGTTGCTGTTGTTG 20  
||||\*|||:|||||||:||  
Sbjct: 377 ACGACGACAACGACAACGAC 358

>novel\_mir\_124 Score: 0.0 R03G\_02827  
Query: 1 TGCTCTTGTTGCTGTTGTTG 20  
|||||  
Sbjct: 338 ACGAGAACAACGACAACAAC 319  
>novel\_mir\_124 Score: 1.5 R03G\_03075  
Query: 1 TGCTCTTGTTGCTGTTGTTG 20  
||||\*:|||||  
Sbjct: 1775 ACGACGACAACGACAACAAC 1756  
>novel\_mir\_124 Score: 2.5 R03G\_03202  
Query: 1 TGCTCTTGTTGCTGTTGTTG 20  
|\*|||||\*|:|||||  
Sbjct: 895 AAGAGAACAACAATAACAAC 876  
>novel\_mir\_124 Score: 2.0 R03G\_03203  
Query: 1 TGCTCTTGTTGCTGTTGTTG 20  
||||\*|||||\*|||||  
Sbjct: 275 ACGACAACAACGACTACAAC 256  
>novel\_mir\_124 Score: 1.5 R03G\_03212  
Query: 1 TGCTCTTGTTGCTGTTGTTG 20  
||||\*:|||||  
Sbjct: 227 ACGACGACAACGACAACAAC 208  
>novel\_mir\_124 Score: 2.0 R03G\_03212  
Query: 1 TGCTCTTGTTGCTGTTGTTG 20  
||||\*:||:|||||  
Sbjct: 173 ACGACGACGACGACAACAAC 154  
>novel\_mir\_124 Score: 2.5 R03G\_03221  
Query: 1 TGCTCTTGTTGCTGTTGTTG 20  
||\*:|||||\*||\*|  
Sbjct: 2588 ACAGGAACAACGACAAC-TC 2570  
>novel\_mir\_124 Score: 1.0 R03G\_03477  
Query: 1 TGCTCTTGTTGCTGTTGTTG 20  
||||\*|||||  
Sbjct: 1130 ACGACAACAACGACAACAAC 1111  
>novel\_mir\_124 Score: 2.0 R03G\_03477  
Query: 1 TGCTCTTGTTGCTGTTGTTG 20  
||||\*|||||\*|||||  
Sbjct: 296 ACGACAACAACAACAACAAC 277  
>novel\_mir\_124 Score: 2.2 R03G\_03495  
Query: 1 TGCTCTTGTTGCTGTTGTTG 20  
|||||||:|||||:|\*||:  
Sbjct: 39 ACGAGAACGACGACGA-AAT 21  
>novel\_mir\_124 Score: 2.0 R03G\_03525  
Query: 1 TGCTCTTGTTGCTGTTGTTG 20  
||||\*|||||\*|||||  
Sbjct: 353 ACGACAACAACAACAACAAC 334  
>novel\_mir\_124 Score: 2.5 R03G\_03548

Query: 1 TGCTCTTGTTGCTGTTGTTG 20  
||\*||||\*:|||||||  
Sbjct: 901 ACAAGAAGGACGACAACAAC 882  
>novel\_mir\_124 Score: 2.0 R03G\_03548  
Query: 1 TGCTCTTGTTGCTGTTGTTG 20  
\*:||\*|||||||  
Sbjct: 844 TTGACAACAACGACAACAAC 825  
>novel\_mir\_124 Score: 1.8 R03G\_03713  
Query: 1 TGCTCTTGTTGCTGTTGTTG 20  
||||\*|||||||:|:|  
Sbjct: 396 ACGACAACAACGACGACGAC 377  
>novel\_mir\_124 Score: 2.5 R03G\_03818  
Query: 1 TGCTCTTGTTGCTGTTGTTG 20  
||\*||\*|||:|||||||  
Sbjct: 1685 ACAACAACGACGACAACAAC 1666  
>novel\_mir\_124 Score: 1.8 R03G\_03857  
Query: 1 TGCTCTTGTTGCTGTTGTTG 20  
:||\*|||:|||||||  
Sbjct: 470 GCGTGAACGACGACAACAAC 451  
>novel\_mir\_124 Score: 1.2 R03G\_03857  
Query: 1 TGCTCTTGTTGCTGTTGTTG 20  
||||\*|||||||:|  
Sbjct: 428 ACGACAACAACGACAACGAC 409  
>novel\_mir\_124 Score: 1.8 R03G\_03907  
Query: 1 TGCTCTTGTTGCTGTTGTTG 20  
||||\*||:|||||||:|  
Sbjct: 204 ACGACAATAACGACAACGAC 185  
>novel\_mir\_124 Score: 2.2 R03G\_03977  
Query: 1 TGCTCTTGTTGCTGTTGTTG 20  
|||||:||||\*|||||:|\*  
Sbjct: 713 ACGAGGACAACAACAACGAG 694  
>novel\_mir\_124 Score: 2.5 R03G\_04003  
Query: 1 TGCTCTTGTTGCTGTTGTTG 20  
\*|||\*|||:|||||:|||||  
Sbjct: 1103 TCGAAAACGACGACGACAAC 1084  
>novel\_mir\_124 Score: 2.0 R03G\_04003  
Query: 1 TGCTCTTGTTGCTGTTGTTG 20  
||||\*|||\*|||||||  
Sbjct: 1046 ACGACAACCACGACAACAAC 1027  
>novel\_mir\_124 Score: 2.5 R03G\_04037  
Query: 1 TGCTCTTGTTGCTGTTGTTG 20  
||||\*:||||\*|||||||  
Sbjct: 737 ACGACGACAACAACAACAAC 718  
>novel\_mir\_124 Score: 1.2 R03G\_00007  
Query: 1 TGCTCTTGTTGCTGTTGTTG 20

||||\*|||||||:|  
Sbjct: 653 ACGACAACAACGACAACGAC 634  
>novel\_mir\_124 Score: 2.0 R03G\_00028  
Query: 1 TGCTCTTGTTGCTGTTGTTG 20  
||||\*|||||\*|||||||  
Sbjct: 380 ACGACAACAACAACAAC 361  
>novel\_mir\_124 Score: 2.5 R03G\_00053  
Query: 1 TGCTCTTGTTGCTGTTGTTG 20  
||||\*|||||\*||||||\*  
Sbjct: 3800 ACGACAACAACCACAACAAA 3781  
>novel\_mir\_124 Score: 2.0 R03G\_00056  
Query: 1 TGCTCTTGTTGCTGTTGTTG 20  
||\*|\*|||||||  
Sbjct: 1538 ACAACAACAACGACAACAAC 1519  
>novel\_mir\_124 Score: 1.5 R03G\_00162  
Query: 1 TGCTCTTGTTGCTGTTGTTG 20  
||||\*|||:|||||||  
Sbjct: 26 ACGACAACGACGACAACAAC 7  
>novel\_mir\_124 Score: 2.0 R03G\_00171  
Query: 1 TGCTCTTGTTGCTGTTGTTG 20  
||\*|\*|||||||  
Sbjct: 733 ACAACAACAACGACAACAAC 714  
>novel\_mir\_124 Score: 1.8 R03G\_00219  
Query: 1 TGCTCTTGTTGCTGTTGTTG 20  
||||\*|||||||:|:|  
Sbjct: 1982 ACGACAACAACGACGACGAC 1963  
>novel\_mir\_124 Score: 0.0 R03G\_00259  
Query: 1 TGCTCTTGTTGCTGTTGTTG 20  
|||||||  
Sbjct: 338 ACGAGAACAACGACAACAAC 319  
>novel\_mir\_124 Score: 1.5 R03G\_00271  
Query: 1 TGCTCTTGTTGCTGTTGTTG 20  
||||\*|||||||:||||  
Sbjct: 513 ACGACAACAACGACAGCAAC 494  
>novel\_mir\_124 Score: 1.0 R03G\_00357  
Query: 1 TGCTCTTGTTGCTGTTGTTG 20  
||||\*|||||||  
Sbjct: 386 ACGACAACAACGACAACAAC 367  
>novel\_mir\_124 Score: 2.2 R03G\_00357  
Query: 1 TGCTCTTGTTGCTGTTGTTG 20  
||||\*:||:|||||||:|  
Sbjct: 350 ACGACGACGACGACAACGAC 331  
>novel\_mir\_124 Score: 2.0 R03G\_00501  
Query: 1 TGCTCTTGTTGCTGTTGTTG 20  
||||\*:||:|||||||

Sbjct: 119 ACGACGACGACGACAACAAC 100  
>novel\_mir\_124 Score: 2.5 R03G\_00535  
Query: 1 TGCTCTTGTTGCTGTTGTTG 20  
||||\*||:|:|||||||\*  
Sbjct: 52 ACGACAATAGCGACAACAAA 33  
>novel\_mir\_124 Score: 1.8 R03G\_00544  
Query: 1 TGCTCTTGTTGCTGTTGTTG 20  
||||\*|:|||||||:|  
Sbjct: 2210 ACGACGACAACGACAACGAC 2191  
>novel\_mir\_124 Score: 2.0 R03G\_00544  
Query: 1 TGCTCTTGTTGCTGTTGTTG 20  
||||\*|||:|||||:||||  
Sbjct: 1385 ACGACAACGACGACGACAAC 1366  
>novel\_mir\_124 Score: 2.2 R03G\_00547  
Query: 1 TGCTCTTGTTGCTGTTGTTG 20  
:|||||||:||||||\*|::  
Sbjct: 1856 GCGAGAACGACGACAA-AGT 1838  
>novel\_mir\_124 Score: 1.8 R03G\_00600  
Query: 1 TGCTCTTGTTGCTGTTGTTG 20  
||||\*|:|||||||:|  
Sbjct: 278 ACGACGACAACGACAACGAC 259  
>novel\_mir\_124 Score: 2.5 R03G\_00640  
Query: 1 TGCTCTTGTTGCTGTTGTTG 20  
||||\*||\*|\*||||||\*||  
Sbjct: 1931 ACGACAACGACGACAACGAC 1912  
>novel\_mir\_124 Score: 2.2 R03G\_00640  
Query: 1 TGCTCTTGTTGCTGTTGTTG 20  
||||\*|||:|||||:||:|  
Sbjct: 1349 ACGACAACGACGACGACGAC 1330  
>novel\_mir\_124 Score: 2.2 R03G\_00640  
Query: 1 TGCTCTTGTTGCTGTTGT-TG 20  
||||\*|:|||||||:|\*||  
Sbjct: 872 ACGACGACAACGACAACGTAC 852  
>novel\_mir\_124 Score: 2.0 R03G\_00729  
Query: 1 TGCTCTTGTTGCTGTTGTTG 20  
||||\*||||\*|\*|||||||  
Sbjct: 947 ACGACAACAACAACAACAAC 928  
>novel\_mir\_124 Score: 1.5 R03G\_00766  
Query: 1 TGCTCTTGTTGCTGTTGTTG 20  
||||\*|||:|||||||  
Sbjct: 1397 ACGACAACGACGACAACAAC 1378  
>novel\_mir\_124 Score: 2.5 R03G\_00853  
Query: 1 TGCTCTTGTTGCTGTTGTTG 20  
||||\*||||\*|\*||||\*||  
Sbjct: 1121 ACGACAACAACAACAAC 1102

>novel\_mir\_124 Score: 2.5 R03G\_00934  
Query: 1 TGCTCTTGTTGCTGTTGTTG 20  
\*|||\*|||||||\*|||||||  
Sbjct: 422 CCGACAACAACGCCAACAAC 403  
>novel\_mir\_124 Score: 2.0 R03G\_00934  
Query: 1 TGCTCTTGTTGCTGTTGTTG 20  
||\*||\*|||||||  
Sbjct: 323 ACAACAACAACGACAACAAC 304  
>novel\_mir\_124 Score: 2.0 R03G\_00934  
Query: 1 TGCTCTTGTTGCTGTTGTTG 20  
||||\*|||:||||:||||  
Sbjct: 299 ACGACAACGACGACGACAAC 280  
>novel\_mir\_124 Score: 2.0 R03G\_00949  
Query: 1 TGCTCTTGTTGCTGTTGTTG 20  
||||\*||||||\*|||||||  
Sbjct: 1208 ACGACAACAACAACAACAAC 1189  
>novel\_mir\_124 Score: 1.5 R03G\_00949  
Query: 1 TGCTCTTGTTGCTGTTGTTG 20  
||||\*:|||||||  
Sbjct: 1160 ACGACGACAACGACAACAAC 1141  
>novel\_mir\_124 Score: 2.5 R03G\_00949  
Query: 1 TGCTCTTGTTGCTGTTGTTG 20  
||||\*||||||\*||||||\*|  
Sbjct: 92 ACGACAACAACAACAACACC 73  
>novel\_mir\_124 Score: 2.5 R03G\_00960  
Query: 1 TGCTCTTGTTGCTGTTGTTG 20  
|||||||:||||:\*||\*  
Sbjct: 33 ACGAGAACAATGACAG-AAG 15  
>novel\_mir\_124 Score: 2.0 R03G\_01092  
Query: 1 TGCTCTTGTTGCTGTTGTTG 20  
||||\*||||||\*|||||||  
Sbjct: 533 ACGACAACAACAACAACAAC 514  
>novel\_mir\_124 Score: 1.8 R03G\_01100  
Query: 1 TGCTCTTGTTGCTGTTGTTG 20  
||\*|||||||:|:|  
Sbjct: 695 ACTAGAACAACGACAGCGAC 676  
>novel\_mir\_124 Score: 2.0 R03G\_01102  
Query: 1 TGCTCTTGTTGCTGTTGTTG 20  
||||\*||:|||||||  
Sbjct: 1397 ACGACGACGACGACAACAAC 1378  
>novel\_mir\_124 Score: 2.5 R03G\_01107  
Query: 1 TGCTCTTGTTGCTGTTGTTG 20  
\*||\*|||||||\*|||||||  
Sbjct: 266 CCTAGAACAACAACAACAAC 247  
>novel\_mir\_124 Score: 1.8 R03G\_01192

Query: 1 TGCTCTTGTTGCTGTTGTTG 20  
||||\*:|||||||:|  
Sbjct: 305 ACGACGACAACGACAACGAC 286  
>novel\_mir\_124 Score: 0.0 R03G\_01198  
Query: 1 TGCTCTTGTTGCTGTTGTTG 20  
|||||||  
Sbjct: 338 ACGAGAACAACGACAACAAC 319  
>novel\_mir\_124 Score: 2.0 R03G\_01238  
Query: 1 TGCTCTTGTTGCTGTTGTTG 20  
||\*|||  
Sbjct: 854 ACTACAACAACGACAACAAC 835  
>novel\_mir\_124 Score: 2.0 R03G\_01247  
Query: 1 TGCTCTTGTTGCTGTTGTTG 20  
||\*|||  
Sbjct: 854 ACTACAACAACGACAACAAC 835  
>novel\_mir\_124 Score: 2.0 R03G\_01350  
Query: 1 TGCTCTTGTTGCTGTTGTTG 20  
||\*|||  
Sbjct: 719 ACAACAACAACGACAACAAC 700  
>novel\_mir\_124 Score: 2.0 R03G\_01351  
Query: 1 TGCTCTTGTTGCTGTTGTTG 20  
||\*|||  
Sbjct: 752 ACAACAACAACGACAACAAC 733  
>novel\_mir\_124 Score: 2.0 R03G\_01361  
Query: 1 TGCTCTTGTTGCTGTTGTTG 20  
||||\*:||:|||||||  
Sbjct: 476 ACGACGACGACGACAACAAC 457  
>novel\_mir\_124 Score: 1.0 R03G\_01361  
Query: 1 TGCTCTTGTTGCTGTTGTTG 20  
||||\*|||  
Sbjct: 446 ACGACAACAACGACAACAAC 427  
>novel\_mir\_124 Score: 2.0 R03G\_01361  
Query: 1 TGCTCTTGTTGCTGTTGTTG 20  
||\*|||  
Sbjct: 404 ACAACAACAACGACAACAAC 385  
>novel\_mir\_124 Score: 2.5 R03G\_01361  
Query: 1 TGCTCTTGTTGCTGTTGTTG 20  
\*||||\*:||:|||||||  
Sbjct: 380 CCGACGACGACGACAACAAC 361  
>novel\_mir\_124 Score: 2.5 R03G\_01374  
Query: 1 TGCTCTTGTTGCTGTTGTTG 20  
|:||\*|||\*|||  
Sbjct: 398 ATGACAACAACAACAACAAC 379  
>novel\_mir\_124 Score: 2.5 R03G\_01415  
Query: 1 TGCTCTTGTTGCTGTTGTTG 20

\*:||||\*|||||||\*  
Sbjct: 49 TTGAGCACAACGACAACAAA 30  
>novel\_mir\_124 Score: 1.8 R03G\_01453  
Query: 1 TGCTCTTGTTGCTGTTGTTG 20  
|||||||\*||\*|:  
Sbjct: 480 ACGAGAACAACGACTACCAT 461  
>novel\_mir\_124 Score: 2.5 R03G\_01458  
Query: 1 TGCTCTTGTTGCTGTTGTTG 20  
||||\*:||:|||||||\*||  
Sbjct: 470 ACGACGACGACGACAACACTAC 451  
>novel\_mir\_124 Score: 1.8 R03G\_01458  
Query: 1 TGCTCTTGTTGCTGTTGTTG 20  
||||\*|||:|||||||:  
Sbjct: 184 ACGATAACGACGACAACAAT 165  
>novel\_mir\_124 Score: 2.0 R03G\_01472  
Query: 1 TGCTCTTGTTGCTGTTGTTG 20  
||||\*|||:|||||:||||  
Sbjct: 1211 ACGACAACGACGACGACAAC 1192  
>novel\_mir\_124 Score: 2.0 R03G\_01552  
Query: 1 TGCTCTTGTTGCTGTTGTTG 20  
||||\*|||||\*|||||||  
Sbjct: 161 ACGACAACAACAACAACAAC 142  
>novel\_mir\_124 Score: 1.2 R03G\_01671  
Query: 1 TGCTCTTGTTGCTGTTGTTG 20  
||||\*|||||||:||  
Sbjct: 368 ACGACAACAACGACAACGAC 349  
>novel\_mir\_124 Score: 1.8 R03G\_01717  
Query: 1 TGCTCTTGTTGCTGTTGTTG 20  
||||\*|||||||:||  
Sbjct: 371 ACGACGACAACGACAACGAC 352  
>novel\_mir\_124 Score: 2.0 R03G\_01791  
Query: 1 TGCTCTTGTTGCTGTTGTTG 20  
||||\*|||||\*|||||||  
Sbjct: 177 ACGACAACAACAACAACAAC 158  
>novel\_mir\_124 Score: 1.5 R03G\_01793  
Query: 1 TGCTCTTGTTGCTGTTGTTG 20  
||||\*|||:|||||||  
Sbjct: 434 ACGACAACGACGACAACAAC 415  
>novel\_mir\_124 Score: 2.5 R03G\_01793  
Query: 1 TGCTCTTGTTGCTGTTGTTG 20  
||\*|\*|||||||:||||  
Sbjct: 386 ACAACAACAACGACGACAAC 367  
>novel\_mir\_124 Score: 2.5 R03G\_01899  
Query: 1 TGCTCTTGTTGCTGTTGTTG 20  
||\*:\*|||||||



Sbjct: 335 ACAGCAACAACGACAACAAC 316  
>novel\_mir\_124 Score: 1.8 R03G\_01899  
Query: 1 TGCTCTTGTTGCTGTTGTTG 20  
||||\*|||:|||||||:|

Sbjct: 299 ACGACAACGACGACAACGAC 280  
>novel\_mir\_124 Score: 1.5 R03G\_01899  
Query: 1 TGCTCTTGTTGCTGTTGTTG 20  
||||\*:|||||||

Sbjct: 119 ACGACGACAACGACAACAAC 100  
>novel\_mir\_124 Score: 2.5 R03G\_01899  
Query: 1 TGCTCTTGTTGCTGTTGTTG 20  
||||\*:||:|||||:|||||

Sbjct: 89 ACGACGACGACGACGACAAC 70  
>novel\_mir\_124 Score: 1.2 R03G\_01909  
Query: 1 TGCTCTTGTTGCTGTTGTTG 20  
|||||||:|||:||||:|

Sbjct: 521 ACGAGAACGACGGCAACGAC 502  
>novel\_mir\_124 Score: 2.5 R03G\_01975  
Query: 1 TGCTCTTGTTGCTGTTGTTG 20  
\*\*|||||\*|||||||

Sbjct: 50 CGGAGAACCACGACAACAAC 31  
>novel\_mir\_124 Score: 1.8 R03G\_01976  
Query: 1 TGCTCTTGTTGCTGTTGTTG 20  
||||\*|||||||:||||:|

Sbjct: 731 ACGACAACAACGGCAACGAC 712  
>novel\_mir\_124 Score: 1.0 R03G\_01976  
Query: 1 TGCTCTTGTTGCTGTTGTTG 20  
||||\*|||||||

Sbjct: 704 ACGACAACAACGACAACAAC 685  
>novel\_mir\_124 Score: 1.5 R03G\_02019  
Query: 1 TGCTCTTGTTGCTGTTGTTG 20  
||||\*|||||||:|||||

Sbjct: 700 ACGACAACAACGGCAACAAC 681  
>novel\_mir\_124 Score: 1.2 R03G\_02027  
Query: 1 TGCTCTTGTTGCTGTTGTTG 20  
||||\*|||||||

Sbjct: 635 ACGACAACAACGACAACGAC 616  
>novel\_mir\_124 Score: 1.8 R03G\_02027  
Query: 1 TGCTCTTGTTGCTGTTGTTG 20  
||||\*|||||||:|\*

Sbjct: 605 ACGACAACAACGACAACGAA 586  
>novel\_mir\_124 Score: 2.5 R03G\_02028  
Query: 1 TGCTCTTGTTGCTGTTGTTG 20  
||||\*:|||||||\*::

Sbjct: 206 ACGACGACAACGACAAC-GT 188

>novel\_mir\_124 Score: 2.2 R03G\_02048  
Query: 1 TGCTCTTGTTGCTGTTGTTG 20  
:\*|||||||\*  
Sbjct: 752 GTTAGAACAAACGACAACAAA 733  
>novel\_mir\_124 Score: 2.2 R03G\_02100  
Query: 1 TGCTCTTGTTGCTGTTGTTG 20  
||||\*:|||||||:|:|  
Sbjct: 473 ACGACGACAACGACGACGAC 454  
>novel\_mir\_124 Score: 1.2 R03G\_02100  
Query: 1 TGCTCTTGTTGCTGTTGTTG 20  
||||\*|||||||:|  
Sbjct: 95 ACGACAACAACGACAACGAC 76  
>novel\_mir\_124 Score: 2.2 R03G\_02199  
Query: 1 TGCTCTTGTTGCTGTTGTTG 20  
|:|||||||:|:|\*  
Sbjct: 562 ATGAGAACAACGATGACGAA 543  
>novel\_mir\_124 Score: 2.2 R03G\_02209  
Query: 1 TGCTCTTGTTGCTGTTGTTG 20  
:|||\*|||||||\*|\*  
Sbjct: 2640 GCGACAACAACGACAACACTAG 2621  
>novel\_mir\_124 Score: 1.8 R03G\_17460  
Query: 1 TGCTCTTGTTGCTGTTGTTG 20  
||||\*:|||||||:|  
Sbjct: 392 ACGACGACAACGACAACGAC 373  
>novel\_mir\_124 Score: 1.8 R03G\_17433  
Query: 1 TGCTCTTGTTGCTGTTGTTG 20  
||||\*:|||||||:|  
Sbjct: 365 ACGACGACAACGACAACGAC 346  
>novel\_mir\_124 Score: 2.2 R03G\_17108  
Query: 1 TGCTCTTGTTGCTGTTGTTG 20  
||||\*:||:|||||||:|  
Sbjct: 401 ACGACGACGACGACAACGAC 382  
>novel\_mir\_124 Score: 2.5 R03G\_16933  
Query: 1 TGCTCTTGTTGCTGTTGTTG 20  
|||||||:|\*|||\*|\*  
Sbjct: 278 ACGAGAACGACAACAACCAG 259  
>novel\_mir\_124 Score: 1.2 R03G\_16959  
Query: 1 TGCTCTTGTTGCTGTTGTTG 20  
||||\*|||||||:|  
Sbjct: 566 ACGACAACAACGACAACGAC 547  
>novel\_mir\_124 Score: 0.0 R03G\_16959  
Query: 1 TGCTCTTGTTGCTGTTGTTG 20  
|||||||  
Sbjct: 425 ACGAGAACAACGACAACAAC 406  
>novel\_mir\_124 Score: 1.5 R03G\_16962



\*:|:|||||||:|\*|||  
Sbjct: 183 TTCTCTTCCTCTTCCTC-CCT 164  
>novel\_mir\_52 Score: 2.2 R03G\_16686  
Query: 1 TGGGGAAGGAGAAGGGGAGGA 21  
:|:|:|||||||:|:|||||  
Sbjct: 1212 GCTTCTTCCTCTTTCTCTCCT 1192  
>novel\_mir\_52 Score: 2.2 R03G\_15990  
Query: 1 TGGGGAAGGAGAAGGGGAGGA 21  
\*||:|||||||:|:|\*|  
Sbjct: 1212 TCCTCTTCCTCTTCCTCTTGT 1192  
>novel\_mir\_52 Score: 2.2 R03G\_15869  
Query: 1 TGGGGAAGGAGAAGGGGAGGA 21  
:|:|:|||||||:|:|||||  
Sbjct: 1212 GCTTCTTCCTCTTTCTCTCCT 1192  
>novel\_mir\_52 Score: 2.2 R03G\_14448  
Query: 1 TGGGGAAGGAGAAGGGGAGGA 21  
\*:|:|||||||:|:|  
Sbjct: 552 TTCTCTTCCTCTTCCTCTTCT 532  
>novel\_mir\_52 Score: 2.2 R03G\_14704  
Query: 1 TGGGGAAGGAGAAGGGGAGGA 21  
:|:|:|||||||:|:|||||  
Sbjct: 1212 GCTTCTTCCTCTTTCTCTCCT 1192  
>novel\_mir\_52 Score: 2.0 R03G\_13996  
Query: 1 TGGGGAAGGAGAAGGGGAGGA 21  
\*|||||||\*|:|||||  
Sbjct: 237 TCCCCTTCCTCTTGCTCTCCT 217  
>novel\_mir\_52 Score: 2.2 R03G\_13450  
Query: 1 TGGGGAAGGAGAAGGGGAGGA 21  
:|:|:|||||||:|:|||||  
Sbjct: 1092 GCTTCTTCCTCTTTCTCTCCT 1072  
>novel\_mir\_52 Score: 2.2 R03G\_13859  
Query: 1 TGGGGAAGGAGAAGGGGAGGA 21  
:|:|:|||||||:|:|||||  
Sbjct: 837 GCTTCTTCCTCTTTCTCTCCT 817  
>novel\_mir\_52 Score: 1.8 R03G\_12863  
Query: 1 TGGGGAAGGAGAAGGGGAGGA 21  
|||:||||:|||||:|:|  
Sbjct: 840 ACCTCTTCTTCTTCCTCTTCT 820  
>novel\_mir\_52 Score: 2.2 R03G\_12951  
Query: 1 TGGGGAAGGAGAAGGGGAGGA 21  
:|:|:|||||||:|:|||||  
Sbjct: 1212 GCTTCTTCCTCTTTCTCTCCT 1192  
>novel\_mir\_52 Score: 2.2 R03G\_12979  
Query: 1 TGGGGAAGGAGAAGGGGAGGA 21  
:|:|:|||||||:|:|||||











Sbjct: 419 AGAAGAAGAAGAAGAACAAG 397  
>novel\_mir\_15 Score: 1.8 R03G\_15706  
Query: 1 TCTCCTTTTTCTTTTTCTTTTC 22  
:|||||:|||||||\*\*||  
Sbjct: 535 GGAGGAAGAAGAAAAGACTAG 514  
>novel\_mir\_15 Score: 2.5 R03G\_15727  
Query: 1 TCTCCTTTTTCTTTTTCTTTTC 22  
|\*|||||||:|\*|||||  
Sbjct: 190 AAAGGAAAAGAAGAA-AAAAG 170  
>novel\_mir\_15 Score: 1.8 R03G\_15845  
Query: 1 TCTCCTTTTTCTTTTTCTTTTC 22  
|||||||:||||\*|:||||  
Sbjct: 1552 AGAGGAAAAGGAAAACGGAAAG 1531  
>novel\_mir\_15 Score: 2.5 R03G\_15854  
Query: 1 TCTCCTTTTTCTTTTTCTT-TTC 22  
|||\*|||:||||:||||\*|||  
Sbjct: 689 AGAAGAAGAAGAAGAAGAAG 667  
>novel\_mir\_15 Score: 2.5 R03G\_15854  
Query: 1 TCTCCTTTTTCTTTTTCTTTTC 22  
:|||\*:|||||||:||:|||  
Sbjct: 178 GGAGCGAAAAGAAAAGGAGAAG 157  
>novel\_mir\_15 Score: 2.5 R03G\_15869  
Query: 1 TCTCCTTTTTCTTTTTCTTTTC 22  
|\*||\*|||||||\*|  
Sbjct: 3587 AAAGAAAAAGAAAAGAAATG 3566  
>novel\_mir\_15 Score: 2.5 R03G\_15313  
Query: 1 TCTCCTTTTTCTTTTTCTTTTC 22  
|\*|||||||:|:|||||||\*  
Sbjct: 47 AAAGGAAAAGGAAAAGAAAAC 26  
>novel\_mir\_15 Score: 2.5 R03G\_15384  
Query: 1 TCTCCTTTTTCTTTTTCTTTTC 22  
||:|||||||\*||||\*|||  
Sbjct: 245 AGGGGAAAAGTAAAAG-TAAG 225  
>novel\_mir\_15 Score: 2.5 R03G\_15437  
Query: 1 TCTCCTTTTTCTTTTTCT-TTTC 22  
|||||:||||\*|||||\*::||  
Sbjct: 1649 AGAGGGAAAAGTAAAAGAGGGAG 1627  
>novel\_mir\_15 Score: 2.5 R03G\_15529  
Query: 1 TCTCCTTTTTCTTTTTCTT-TTC 22  
|||\*|||||||\*||\*|||  
Sbjct: 1420 AGAAGAAAAGAAAATAATAAG 1398  
>novel\_mir\_15 Score: 2.5 R03G\_15530  
Query: 1 TCTCCTTTTTCTTTTTCTTTTC 22  
:|||||:||:||:||:||:|||  
Sbjct: 535 GGAGGAGAAGGAGAAGGAGAAG 514

>novel\_mir\_15 Score: 1.8 R03G\_15554  
Query: 1 TCTCCTTTTTCTTTTTCTTTTC 22  
|||\*||:|||||||:||  
Sbjct: 518 AGAAGAGAAAGAAAAGAAGAG 497

>novel\_mir\_15 Score: 2.0 R03G\_15565  
Query: 1 TCTCCTTTTTCTTTTTCTTTTC 22  
\*||||:|:||||:|||||||  
Sbjct: 709 CGAGGGAGAAGAAGAAGAAAAG 688

>novel\_mir\_15 Score: 2.5 R03G\_15567  
Query: 1 TCTCCTTTTTCTTTTTCTTTTC 22  
|||\*|||:||||||||||\*\*  
Sbjct: 316 AGAAGAAGAAGAAAAGAAATT 295

>novel\_mir\_15 Score: 2.5 R03G\_15567  
Query: 1 TCTCCTTTTTCTTTTTCTTTTC 22  
|||\*||||||||||\*\*\*||  
Sbjct: 211 AGAAGAAAAGAAAAGTCCAG 190

>novel\_mir\_15 Score: 2.5 R03G\_14811  
Query: 1 TCTCCTTTTTCTTTTTCTT-TTC 22  
|||\*|||:||||:||||\*||  
Sbjct: 707 AGAAGAAGAAGAAGAAGAAG 685

>novel\_mir\_15 Score: 2.5 R03G\_14812  
Query: 1 TCTCCTTTTTCTTTTTCTTTTC 22  
\*||\*|||||||:||||\*|  
Sbjct: 584 TGACGAAAAGAAAGAGAAATG 563

>novel\_mir\_15 Score: 2.0 R03G\_15034  
Query: 1 TCTCCTTTTTCTTTTTCTTTTC 22  
|\*||||:||||:|||||||  
Sbjct: 1399 AAAGGAAGAAGAGAAAGAAAAG 1378

>novel\_mir\_15 Score: 2.0 R03G\_15117  
Query: 1 TCTCCTTTTTCTTTTTCTTTTC 22  
|\*|||||||:|||||\*  
Sbjct: 47 AAAGGAAAAGAAAGAGAAAAC 26

>novel\_mir\_15 Score: 1.2 R03G\_15120  
Query: 1 TCTCCTTTTTCTTTTTCTTTTC 22  
|||||||:|\*|:||  
Sbjct: 466 AGAGGAAAAGAAAAGG-AGAG 446

>novel\_mir\_15 Score: 2.5 R03G\_15181  
Query: 1 TCTCCTTTTTCTTTTTCTTTTC 22  
||||||:|||||:|\*|\*||  
Sbjct: 801 AGAGGAAGAAGAAAGA-ACAAG 781

>novel\_mir\_15 Score: 2.2 R03G\_14402  
Query: 1 TCTCCTTTTTCTTTTTCT-TTTC 22  
|||\*||||||||||\*\*:||  
Sbjct: 1705 AGAAGAAAAGAAAAGTTGAAG 1683

>novel\_mir\_15 Score: 2.5 R03G\_14420

Query: 1 TCTCCTTTTTCTTTTTCTT-TTC 22  
|||\*|||:||||:||||\*|||  
Sbjct: 1796 AGAAGAAGAAGAAGAAGAAG 1774  
>novel\_mir\_15 Score: 2.5 R03G\_14543  
Query: 1 TCTCCTTTTTCTTTTTCTT-TTC 22  
|||\*|||:||||:||||\*|||  
Sbjct: 1559 AGAAGAAGAAGAAGAAGAAG 1537  
>novel\_mir\_15 Score: 2.0 R03G\_14544  
Query: 1 TCTCCTTTTTCTTTTTCTT-TTC 22  
|||||||:||||:|||\*|||  
Sbjct: 1265 AGAGGAAGAAGAAGCAGAAG 1243  
>novel\_mir\_15 Score: 2.5 R03G\_14704  
Query: 1 TCTCCTTTTTCTTTTTCTTTTC 22  
|\*||\*|||||||\*|  
Sbjct: 3428 AAAGAAAAAGAAAAAGAAATG 3407  
>novel\_mir\_15 Score: 2.5 R03G\_14098  
Query: 1 TCTCCTTTTTCTTTTTCTTTTC 22  
|||\*|||:||||:||||\*|  
Sbjct: 334 AGAAGAAAGAGAAAGAGAAATG 313  
>novel\_mir\_15 Score: 2.5 R03G\_14111  
Query: 1 TCTCCTTTTTCTTTTTCTTTTC 22  
\*\*|||||:|||||||\*|  
Sbjct: 1069 CTAGGAAGAAGAAAAAGAAAA 1048  
>novel\_mir\_15 Score: 2.5 R03G\_14284  
Query: 1 TCTCCTTTTTCTTTTTCTTTTC 22  
||||||\*||||||\*|||\*|  
Sbjct: 1142 AGAGGAACAAGAAAAACAAAAT 1121  
>novel\_mir\_15 Score: 2.0 R03G\_13440  
Query: 1 TCTCCTTTTTCTTTTTCTTTTC 22  
||||||:|:\*|||||||  
Sbjct: 1102 AGAGGAGAAGAAAAAGAAAAG 1081  
>novel\_mir\_15 Score: 2.5 R03G\_13440  
Query: 1 TCTCCTTTTTCTTTTTCTTTTC 22  
:|||\*|:|||||||\*|||  
Sbjct: 1057 GGAGAAGAAAGAAAAAGGCAAG 1036  
>novel\_mir\_15 Score: 1.2 R03G\_13440  
Query: 1 TCTCCTTTTTCTTTTTCTTTTC 22  
|||||||:|:|:|  
Sbjct: 811 AGAGGAAAAAGGAAAGGGAAAG 790  
>novel\_mir\_15 Score: 2.5 R03G\_13450  
Query: 1 TCTCCTTTTTCTTTTTCTTTTC 22  
|\*||\*|||||||\*|  
Sbjct: 3245 AAAGAAAAAGAAAAAGAAATG 3224  
>novel\_mir\_15 Score: 1.8 R03G\_13511  
Query: 1 TCTCCTTTTTCTTTTTCTTTTC 22

|||||:||||:||||:\*\|  
Sbjct: 239 AGAGGAAGAAGAAGAAGAAGTG 218  
>novel\_mir\_15 Score: 2.2 R03G\_13742  
Query: 1 TCTCCTTTTCTTTTCTTTTC 22  
:||||:||||\*||||\*||||  
Sbjct: 378 GGAGGAGAAAGATAAAG-AAAG 358  
>novel\_mir\_15 Score: 2.2 R03G\_13848  
Query: 1 TCTCCTTTTCTTTTCTTTTC 22  
:||||:||||\*||||\*||||  
Sbjct: 378 GGAGGAGAAAGATAAAG-AAAG 358  
>novel\_mir\_15 Score: 2.5 R03G\_13859  
Query: 1 TCTCCTTTTCTTTTCTTTTC 22  
|\*|\*|||||\*|  
Sbjct: 3212 AAAGAAAAAAGAAAAAGAAATG 3191  
>novel\_mir\_15 Score: 2.5 R03G\_12779  
Query: 1 TCTCCTTTTCTTTTCTTTTC 22  
||\*|||:||||:||||\*||  
Sbjct: 502 AGAAGAAGAAGAAGAAGAATAG 481  
>novel\_mir\_15 Score: 2.5 R03G\_12845  
Query: 1 TCTCCTTTTCTTTTCTTTTC 22  
||||\*::||:|||||  
Sbjct: 985 AGAGGTGAAGGAGAAAGAAAAG 964  
>novel\_mir\_15 Score: 2.5 R03G\_12853  
Query: 1 TCTCCTTTTCTTTTCTT-TTC 22  
|||||:|||:|\*||\*||  
Sbjct: 137 AGAGGAAGAAGGAGAAGCAGAAG 115  
>novel\_mir\_15 Score: 2.5 R03G\_12882  
Query: 1 TCTCCTTTTCTTTTCT-TTTC 22  
||\*|:|||||\*|||  
Sbjct: 707 AGAAGGAAAAGAAAAGTTAAAG 685  
>novel\_mir\_15 Score: 2.5 R03G\_12979  
Query: 1 TCTCCTTTTCTTTTCTTTTC 22  
|\*|\*|||||\*|  
Sbjct: 3428 AAAGAAAAAAGAAAAAGAAATG 3407  
>novel\_mir\_15 Score: 2.5 R03G\_12990  
Query: 1 TCTCCTTTTCTTTTCTT-TTC 22  
||\*|||:||||:||||\*||  
Sbjct: 557 AGAAGAAGAAGAAGAAGAAGAAG 535  
>novel\_mir\_15 Score: 2.5 R03G\_13152  
Query: 1 TCTCCTTTTCTTTTCTTTTC 22  
|\*|\*|||||\*|  
Sbjct: 3428 AAAGAAAAAAGAAAAAGAAATG 3407  
>novel\_mir\_15 Score: 2.5 R03G\_13159  
Query: 1 TCTCCTTTTCTTTTCTTTTC 22  
|||||:||\*|::||

Sbjct: 940 AGAGGAAAAAGAGAAGAAGGAG 919  
>novel\_mir\_15 Score: 2.0 R03G\_13255  
Query: 1 TCTCCTTTTTCTTTTTCTT-TTC 22  
|||||\*|||||:||||\*|||

Sbjct: 218 AGAGGAACAAGAAGAAGAAG 196  
>novel\_mir\_15 Score: 2.5 R03G\_12087  
Query: 1 TCTCCTTTTTCTTTTTCTTTTC 22  
|\*||\*|||||||\*|

Sbjct: 3428 AAAGAAAAAGAAAAGAAATG 3407  
>novel\_mir\_15 Score: 1.0 R03G\_12101  
Query: 1 TCTCCTTTTTCTTTTTCTTTTC 22  
|||||:|||||:|||||

Sbjct: 1024 AGAGGAAGAAGAAGAAGAAAAG 1003  
>novel\_mir\_15 Score: 2.5 R03G\_12193  
Query: 1 TCTCCTTTTTCTTTTTCTTTTC 22  
|\*||\*|||||||\*|

Sbjct: 434 AAAGAAAAAGAAAAGAAATG 413  
>novel\_mir\_15 Score: 2.5 R03G\_12233  
Query: 1 TCTCCTTTTTCTTTTTCTTTTC 22  
|||\*|||:|||||:|\*|||

Sbjct: 436 AGAAGAAGAAGAAAAGG-AAAG 416  
>novel\_mir\_15 Score: 2.5 R03G\_12385  
Query: 1 TCTCCTTTTTCTTTTTCTTTTC 22  
\*||\*|||:|||||||\*|||

Sbjct: 512 TGACGAAAGAGAAAAG-AAAG 492  
>novel\_mir\_15 Score: 2.5 R03G\_12423  
Query: 1 TCTCCTTTTTCTTTTTCTT-TTC 22  
|||\*|||:|||||:||||\*|||

Sbjct: 320 AGAAGAAGAAGAAGAAGAAG 298  
>novel\_mir\_15 Score: 2.2 R03G\_12554  
Query: 1 TCTCCTTTTTCTTTTTCTT-TTC 22  
|||||||:|\*|||||:|\*|||

Sbjct: 308 AGAGGAAAGAAAAAAGGAGAAG 286  
>novel\_mir\_15 Score: 1.8 R03G\_11135  
Query: 1 TCTCCTTTTTCTTTTTCTTTTC 22  
:|||||||\*||:|||||

Sbjct: 238 GGAGGAAAATAAGAAGAAAAG 217  
>novel\_mir\_15 Score: 2.5 R03G\_11166  
Query: 1 TCTCCTTTTTCTTTTTCTTTTC 22  
|||\*|||||:||:|||||

Sbjct: 1012 AGAAGAAAAGGAGGAAGAAAAG 991  
>novel\_mir\_15 Score: 2.5 R03G\_11210  
Query: 1 TCTCCTTTTTCTTTTTCTTTTC 22  
:||||\*|:|||||||\*|

Sbjct: 1024 GGAGGACGAAGAAAAGAAATGG 1003





|||\*||:|||||||\*|||\*  
Sbjct: 347 AGAAGAGAAAGAAAAAGCAAAA 326  
>novel\_mir\_15 Score: 2.5 R03G\_09298  
Query: 1 TCTCCTTTTCTTTTCTTTTC 22  
\*||\*||||:||:|||||||  
Sbjct: 694 TGAAGAAAAGGAAGAAGAAAAG 673  
>novel\_mir\_15 Score: 2.0 R03G\_09319  
Query: 1 TCTCCTTTTCTTTTCTT-TTC 22  
|||||||:|:||||||\*\*||  
Sbjct: 848 AGAGGAAAAGGGAAAAGAAGACTAG 826  
>novel\_mir\_15 Score: 2.2 R03G\_09426  
Query: 1 TCTCCTTTTCTTTTCTTTTC 22  
|||\*|||:||||||:||:|||  
Sbjct: 1703 AGATGAAGAAGAAAAGGAGAAG 1682  
>novel\_mir\_15 Score: 2.2 R03G\_09435  
Query: 1 TCTCCTTTTCTTTTCTTTTC 22  
:||\*|||||||:||||\*|  
Sbjct: 230 GGAAGAAAAGAAAAGGAAATG 209  
>novel\_mir\_15 Score: 2.2 R03G\_09607  
Query: 1 TCTCCTTTTCTTTTCTTTTC 22  
:||||:||||\*||||\*|||  
Sbjct: 378 GGAGGAGAAAGATAAAG-AAAG 358  
>novel\_mir\_15 Score: 2.5 R03G\_09697  
Query: 1 TCTCCTTTTCTTTTCTT-TTC 22  
|||\*|:||||||:||||\*|||  
Sbjct: 281 AGAAGGAAAAGAAGAAGAAGAAG 259  
>novel\_mir\_15 Score: 2.5 R03G\_09755  
Query: 1 TCTCCTTTTCTTTTCTT-TTC 22  
|||\*|||:||||:||||\*|||  
Sbjct: 2243 AGAAGAAGAAGAAGAAGAAGAAG 2221  
>novel\_mir\_15 Score: 1.5 R03G\_09778  
Query: 1 TCTCCTTTTCTTTTCTTTTC 22  
|||||||\*|||  
Sbjct: 1461 AGAGGAAAAGAAAAGAACTAAAG 1440  
>novel\_mir\_15 Score: 2.2 R03G\_09868  
Query: 1 TCTCCTTTTCTTTTCTTTTC 22  
|||\*|||:||||:||||:||  
Sbjct: 395 AGAAGAAGAAGAAGAAGAAGAG 374  
>novel\_mir\_15 Score: 2.5 R03G\_09894  
Query: 1 TCTCCTTTTCTTTTCTT-TTC 22  
||\*|||||:||||:||\*|||  
Sbjct: 1633 AGCGGAAAAGGAAAAGGAACAAG 1611  
>novel\_mir\_15 Score: 2.5 R03G\_10079  
Query: 1 TCTCCTTTTCTTTTCTT-TTC 22  
|||\*|||:||||:||||\*|||



Sbjct: 740 AGAAGAAGAAGAAGAAGAAG 718  
>novel\_mir\_15 Score: 2.5 R03G\_08080  
Query: 1 TCTCCTTTTTCTTTTTCTTTTC 22  
\*||||\*|||||\*|||||||  
Sbjct: 190 CGAGGTAAAAGACAAAGAAAAG 169  
>novel\_mir\_15 Score: 2.2 R03G\_08165  
Query: 1 TCTCCTTTTTCTTTTTCTTTTC 22  
:||\*|||||:|:|||||||  
Sbjct: 757 GGAAGAAAAGGAGAAAAGAAAAG 736  
>novel\_mir\_15 Score: 2.5 R03G\_08243  
Query: 1 TCTCCTTTTTCTTTTTCTT-TTC 22  
|||\*|||:|||||:||||\*|||  
Sbjct: 74 AGAAGAAGAAGAAGAAGAAG 52  
>novel\_mir\_15 Score: 2.5 R03G\_08358  
Query: 1 TCTCCTTTTTCTTTTTCTT-TTC 22  
|||\*|||:|||||:||||\*|||  
Sbjct: 1106 AGATGAAGAAGAAGAAGAAG 1084  
>novel\_mir\_15 Score: 2.5 R03G\_08412  
Query: 1 TCTCCTTTTTCTTTTTCTT-TTC 22  
|||\*|||:|||||:||||\*|||  
Sbjct: 656 AGAAGAAGAAGAAGAAGAAG 634  
>novel\_mir\_15 Score: 2.5 R03G\_08542  
Query: 1 TCTCCTTTTTCTTTTTCTTTTC 22  
|||||||:|||||:||\*|||\*  
Sbjct: 160 AGAGGAAGAAGAAGAA-AAAAT 140  
>novel\_mir\_15 Score: 2.5 R03G\_08612  
Query: 1 TCTCCTTTTTCTTTTTCTTTTC 22  
|\*||\*|||||||\*|  
Sbjct: 3428 AAAGAAAAAGAAAAGAAATG 3407  
>novel\_mir\_15 Score: 1.8 R03G\_08620  
Query: 1 TCTCCTTTTTCTTTTTCTTTTC 22  
|||||||:|||||:|||||:||  
Sbjct: 214 AGAGGAAGAAGAGGAAGAAGAG 193  
>novel\_mir\_15 Score: 2.5 R03G\_08623  
Query: 1 TCTCCTTTTTCTTTTTCTT-TTC 22  
|||\*|||:|||||:||||\*|||  
Sbjct: 419 AGAAGAAGAAGAAGAAGAAG 397  
>novel\_mir\_15 Score: 2.2 R03G\_08661  
Query: 1 TCTCCTTTTTCTTTTTCTTTTC 22  
:|||||:||||\*|||\*|||  
Sbjct: 378 GGAGGAGAAAGATAAAG-AAAG 358  
>novel\_mir\_15 Score: 2.2 R03G\_08748  
Query: 1 TCTCCTTTTTCTTTTTCTTTTC 22  
|||\*|||||||\*|:|||  
Sbjct: 406 AGAAGAAAAGAAAAAAGAAG 385

>novel\_mir\_15 Score: 2.0 R03G\_08798  
Query: 1 TCTCCTTTTTCTTTTTCT-TTTC 22  
|\*|||||\*|||\*  
Sbjct: 386 AAAGGAAAAAGAAAAAGATAAAC 364

>novel\_mir\_15 Score: 2.2 R03G\_08846  
Query: 1 TCTCCTTTTTCTTTTTCTTTTC 22  
:||||:||||\*||||\*|||  
Sbjct: 378 GGAGGAGAAAGATAAAG-AAAG 358

>novel\_mir\_15 Score: 2.0 R03G\_08999  
Query: 1 TCTCCTTTTTCTTTTTCTTTTC 22  
|||\*|||:|||||\*|  
Sbjct: 583 AGAAGAAAGAGAAAAAGAAACG 562

>novel\_mir\_15 Score: 2.0 R03G\_09019  
Query: 1 TCTCCTTTTTCTTTTTCTTTTC 22  
|||\*|:|||||:|  
Sbjct: 38 AGAAGGAAAAGAAAAAGAGGAG 17

>novel\_mir\_15 Score: 2.0 R03G\_09061  
Query: 1 TCTCCTTTTTCTTTTTCTT-TTC 22  
|||\*|||||:||||\*|||  
Sbjct: 2168 AGAAGAAAAGAAGAAGAAGAAG 2146

>novel\_mir\_15 Score: 2.5 R03G\_06744  
Query: 1 TCTCCTTTTTCTTTTTCTTTTC 22  
|||\*|:|||||:||\*|||  
Sbjct: 464 AGATGGAAAAGAAAGAG-AAAG 444

>novel\_mir\_15 Score: 2.5 R03G\_06877  
Query: 1 TCTCCTTTTTCTTTTTCTT-TTC 22  
|||\*|||||:|:||||\*|||  
Sbjct: 1322 AGAAGAAAAGGAGAAGAAGAAG 1300

>novel\_mir\_15 Score: 2.5 R03G\_06906  
Query: 1 TCTCCTTTTTCTTTTTCTTTTC 22  
|||\*|||:||||:||||\*|||  
Sbjct: 227 AGAAGAAGAAGAGAAAG-AAAG 207

>novel\_mir\_15 Score: 2.2 R03G\_07072  
Query: 1 TCTCCTTTTTCTTTTTCT-TTTC 22  
|||\*|||||:|||\*|||  
Sbjct: 458 AGAAGAAAAGAAGAAGGAAAAG 436

>novel\_mir\_15 Score: 2.2 R03G\_07217  
Query: 1 TCTCCTTTTTCTTTTTCTTTTC 22  
:||\*|||:||||:|||||  
Sbjct: 493 GGAAGAAGAAGAAGAAGAAAAG 472

>novel\_mir\_15 Score: 2.2 R03G\_07217  
Query: 1 TCTCCTTTTTCTTTTTCTTTTC 22  
:||\*|||:||||:|||||  
Sbjct: 442 GGAAGAAGAAGAAGAAGAAAAG 421

>novel\_mir\_15 Score: 1.2 R03G\_07217

Query: 1 TCTCCTTTTTCTTTTTCTT-TTC 22  
:|||||:||||\*|||  
Sbjct: 388 GGAGGAAAAGAAAAGGAAGAAG 366  
>novel\_mir\_15 Score: 2.2 R03G\_07217  
Query: 1 TCTCCTTTTTCTTTTTCTTTTC 22  
:||\*|||:||||:|||||||  
Sbjct: 304 GGAAGAAGAAGAAGAAAAG 283  
>novel\_mir\_15 Score: 2.2 R03G\_07291  
Query: 1 TCTCCTTTTTCTTTTTCTTTTC 22  
\*|||\*|||:|||||||:|||  
Sbjct: 1159 CGAGAAAAGGAAAAGAGAAG 1138  
>novel\_mir\_15 Score: 2.5 R03G\_07305  
Query: 1 TCTCCTTTTTCTTTTTCTTTTC 22  
|\*||\*|||||\*|  
Sbjct: 3428 AAAGAAAAAGAAAAGAAATG 3407  
>novel\_mir\_15 Score: 2.2 R03G\_07322  
Query: 1 TCTCCTTTTTCTTTTTCTTTT-C 22  
|||\*|||||:|||||:||\*|  
Sbjct: 497 AGAGAAAAGGAAAAGAGAACG 475  
>novel\_mir\_15 Score: 1.8 R03G\_07351  
Query: 1 TCTCCTTTTTCTTTTTCTTTTC 22  
|||||:|\*|||:||||\*|||  
Sbjct: 835 AGAGGAAAAGAAAAGAGAAAG 814  
>novel\_mir\_15 Score: 2.5 R03G\_07561  
Query: 1 TCTCCTTTTTCTTTTTCTTTTC 22  
|||||:||\*|||:||||\*|||  
Sbjct: 361 AGAGGAGAACGAAGAAGAACAG 340  
>novel\_mir\_15 Score: 1.2 R03G\_07561  
Query: 1 TCTCCTTTTTCTTTTTCTTTTC 22  
|||||:||||:|||||:||  
Sbjct: 196 AGAGGAAGAAGAGAAAGAAGAG 175  
>novel\_mir\_15 Score: 2.5 R03G\_07619  
Query: 1 TCTCCTTTTTCTTTTTCTT-TTC 22  
|||\*|||:||||:||||\*|||  
Sbjct: 1856 AGAAGAAGAAGAAGAAGAAG 1834  
>novel\_mir\_15 Score: 2.2 R03G\_07704  
Query: 1 TCTCCTTTTTCTTTTTCTTTTC 22  
:||||:||||\*|||\*|||  
Sbjct: 378 GGAGGAGAAAGATAAAG-AAAG 358  
>novel\_mir\_15 Score: 1.5 R03G\_07923  
Query: 1 TCTCCTTTTTCTTTTTCT-TTTC 22  
|||||\*|||||\*|||  
Sbjct: 593 AGAGGAAAACAAAAGAAAAG 571  
>novel\_mir\_15 Score: 2.0 R03G\_07949  
Query: 1 TCTCCTTTTTCTTTTTCTT-TTC 22

|||\*|||||||:||||\*|||  
Sbjct: 272 AGAAGAAAAAGAAGAAGAAG 250  
>novel\_mir\_15 Score: 2.2 R03G\_05622  
Query: 1 TTCCTTTTTCTTTTTCTTTTC 22  
:||||:||||\*||||\*|||  
Sbjct: 378 GGAGGAGAAAGATAAAG-AAAG 358  
>novel\_mir\_15 Score: 2.5 R03G\_05630  
Query: 1 TTCCTTTTTCTTTTTCTTTTC 22  
|\*||\*|||||||\*|  
Sbjct: 3347 AAAGAAAAAGAAAAAGAAATG 3326  
>novel\_mir\_15 Score: 2.2 R03G\_05635  
Query: 1 TTCCTTTTTCTTTTTCTTTTC 22  
:||||:||||\*||||\*|||  
Sbjct: 378 GGAGGAGAAAGATAAAG-AAAG 358  
>novel\_mir\_15 Score: 2.5 R03G\_05746  
Query: 1 TTCCTTTTTCTTTTTCTTTTC 22  
:|||||||\*||\*||:|||  
Sbjct: 331 GGAGAAAAAGTAACAGGAAAG 310  
>novel\_mir\_15 Score: 2.5 R03G\_05754  
Query: 1 TTCCTTTTTCTTTTTCTT-TTC 22  
|||\*|||:||||:||||\*|||  
Sbjct: 632 AGAAGAAGAAGAAGAAGAAG 610  
>novel\_mir\_15 Score: 2.5 R03G\_05804  
Query: 1 TTCCTTTTTCTTTTTCTTTTC 22  
:|||||||:|\*|:|||  
Sbjct: 229 GGAGAAAAAGAGAAGAAGAAG 208  
>novel\_mir\_15 Score: 1.8 R03G\_05857  
Query: 1 TTCCTTTTTCTTTTTCTTTTC 22  
:||\*|||||||:|||||||  
Sbjct: 64 GGAAGAAAAAGAAGAAGAAAAG 43  
>novel\_mir\_15 Score: 2.5 R03G\_05884  
Query: 1 TTCCTTTTTCTTTTTCTT-TTC 22  
|||\*|||:||||:||||\*|||  
Sbjct: 1226 AGAAGAAGAAGAAGAAGAAG 1204  
>novel\_mir\_15 Score: 2.5 R03G\_05998  
Query: 1 TTCCTTTTTCTTTTTCTTTTC 22  
|\*|||||:||||||\*||\*  
Sbjct: 2185 AAAGGAAAAGGAAAAAGTAAAA 2164  
>novel\_mir\_15 Score: 2.2 R03G\_06032  
Query: 1 TTCCTTTTTCTTTTTCT-TTTC 22  
|||\*|||||||:|||\*|||  
Sbjct: 371 AGAAGAAAAAGAAGAAGGAAAAG 349  
>novel\_mir\_15 Score: 2.2 R03G\_06085  
Query: 1 TTCCTTTTTCTTTTTCTTTTC 22  
|||||||:||||:||\*|||

Sbjct: 314 AGAGGAAGGAGAAGAAGTGAAG 293  
>novel\_mir\_15 Score: 2.5 R03G\_06143  
Query: 1 TCTCCTTTTTCTTTTTCTT-TTC 22  
|||\*|||\*|||||||\*|||

Sbjct: 206 AGAAGAACAAGAAAAGAAGAAG 184  
>novel\_mir\_15 Score: 2.5 R03G\_06143  
Query: 1 TCTCCTTTTTCTTTTTCT-TTTC 22  
|||\*|:|||||:||||\*|||

Sbjct: 176 AGAAGGAAAAGAAGAAGAAAAG 154  
>novel\_mir\_15 Score: 1.0 R03G\_06159  
Query: 1 TCTCCTTTTTCTTTTTCTTTTC 22  
|||||:||||:|||||||

Sbjct: 1423 AGAGGAAGAAGAGAAAAGAAAAG 1402  
>novel\_mir\_15 Score: 1.8 R03G\_06204  
Query: 1 TCTCCTTTTTCTTTTTCTTTTC 22  
|||\*|||||||:|\*

Sbjct: 3403 AGAAGAAAAGAAAAGAAGAA 3382  
>novel\_mir\_15 Score: 2.5 R03G\_06283  
Query: 1 TCTCCTTTTTCTTTTTCTTTTC 22  
||||\*||||\*|:|||||||

Sbjct: 1435 AGAGAAAAATAGAAAGAAAAG 1414  
>novel\_mir\_15 Score: 2.2 R03G\_06299  
Query: 1 TCTCCTTTTTCTTTTTCTTTTC 22  
||||\*|:|||||:||||:|

Sbjct: 617 AGAGAAGAAAGAAAGAGAAGAG 596  
>novel\_mir\_15 Score: 2.5 R03G\_06416  
Query: 1 TCTCCTTTTTCTTTTTCTTTTC 22  
|\*||\*|||||||\*|

Sbjct: 3587 AAAGAAAAAGAAAAGAAATG 3566  
>novel\_mir\_15 Score: 2.2 R03G\_06459  
Query: 1 TCTCCTTTTTCTTTTTCTTTTC 22  
:\*||\*|||||||

Sbjct: 157 GAAGAAAAAGAAAAGAAAAG 136  
>novel\_mir\_15 Score: 2.0 R03G\_06480  
Query: 1 TCTCCTTTTTCTTTTTCTTTTC 22  
|||\*|||:|||||||\*|

Sbjct: 413 AGAAGAAGAAGAAAAGAAAAC 392  
>novel\_mir\_15 Score: 2.2 R03G\_06643  
Query: 1 TCTCCTTTTTCTTTTTCTT-TTC 22  
:||||:|||||:|||\*|\*||

Sbjct: 659 GGAGGAAAAGAAGAAGTAGAAG 637  
>novel\_mir\_15 Score: 1.8 R03G\_06674  
Query: 1 TCTCCTTTTTCTTTTTCTTTTC 22  
||||||:|||:|||||:|\*|

Sbjct: 356 AGAGGAAGAAGGAAAAGAGAAT 335

>novel\_mir\_15 Score: 2.0 R03G\_04246  
Query: 1 TCTCCTTTTTCTTTTTCTTTTC 22  
|||||:|||||:||\*||  
Sbjct: 415 AGAGGAGGAAGAAAAGGAACAG 394

>novel\_mir\_15 Score: 1.8 R03G\_04274  
Query: 1 TCTCCTTTTTCTTTTTCTTTTC 22  
:||\*|||:|||||  
Sbjct: 1045 GGAAGAAGAAGAAAAGAAAAG 1024

>novel\_mir\_15 Score: 2.5 R03G\_04287  
Query: 1 TCTCCTTTTTCTTTTTCTT-TTC 22  
||\*|||:|||||:||||\*||  
Sbjct: 2132 AGAAGAAGAAGAAGAAGAAG 2110

>novel\_mir\_15 Score: 2.2 R03G\_04404  
Query: 1 TCTCCTTTTTCTTTTTCTTTTC 22  
|||||:|||||:||\*|:|\*|  
Sbjct: 964 AGAGGAAAAAGAGAAAAGATG 943

>novel\_mir\_15 Score: 1.2 R03G\_04457  
Query: 1 TCTCCTTTTTCTTTTTCTTTTC 22  
:|||||:|||||  
Sbjct: 133 GGAGGAAAAAGAGGAAGAAAAG 112

>novel\_mir\_15 Score: 2.5 R03G\_04513  
Query: 1 TCTCCTTTTTCTTTTTCT-TTTC 22  
||\*|||||:||:||\*|||  
Sbjct: 919 AGAAGAAAAAGAGAAGGAGAAAG 897

>novel\_mir\_15 Score: 1.5 R03G\_04550  
Query: 1 TCTCCTTTTTCTTTTTCTT-TTC 22  
|||||:|||||:||||\*||  
Sbjct: 1238 AGAGGAAGAAGAAGAAGAAG 1216

>novel\_mir\_15 Score: 2.2 R03G\_04550  
Query: 1 TCTCCTTTTTCTTTTTCTTTTC 22  
||\*|||:|||||:||||:||  
Sbjct: 464 AGAAGAAGAAGAAGAAGAAGAG 443

>novel\_mir\_15 Score: 2.5 R03G\_04734  
Query: 1 TCTCCTTTTTCTTTTTCTTTTC 22  
|||||:||:|||:|:||:|  
Sbjct: 233 AGAGGAGAAGGAAGAGGAGGAG 212

>novel\_mir\_15 Score: 2.0 R03G\_04821  
Query: 1 TCTCCTTTTTCTTTTTCT-TTTC 22  
||||\*|||:|||||\*|||  
Sbjct: 153 AGAGAAAAAGGAAAAGAGAAAG 131

>novel\_mir\_15 Score: 2.5 R03G\_04859  
Query: 1 TCTCCTTTTTCTTTTTCTTTTC 22  
:||\*|||:|||||:||:|||  
Sbjct: 187 GGACGAAGAAGAAAAGGAGAAG 166

>novel\_mir\_15 Score: 2.5 R03G\_04929

Query: 1 TCTCCTTTTTCTTTTTCTTT-TC 22  
|||\*|||:|||||\*|\*  
Sbjct: 461 AGAAGAAAAAGAAGAAGAAATAA 439  
>novel\_mir\_15 Score: 2.5 R03G\_04992  
Query: 1 TCTCCTTTTTCTTTTTCTTTTC 22  
||\*|||:|:||||\*|  
Sbjct: 217 AGTGGAAAAAGAGAAGGAAACG 196  
>novel\_mir\_15 Score: 2.2 R03G\_05066  
Query: 1 TCTCCTTTTTCTTTTTCTTTTC 22  
|||\*|||:|||||:|\*  
Sbjct: 215 AGAAGAAGAAGAAAAGAAGAA 194  
>novel\_mir\_15 Score: 2.0 R03G\_05103  
Query: 1 TCTCCTTTTTCTTTTTCTTTTC 22  
|\*|||:|||||:|||||  
Sbjct: 1124 ACAGGGAAAAGAAGAAGAAAAG 1103  
>novel\_mir\_15 Score: 2.5 R03G\_05280  
Query: 1 TCTCCTTTTTCTTTTTCTTTTC 22  
|\*||\*|||:|||||:|||||\*|  
Sbjct: 3428 AAAGAAAAAGAAAAGAAATG 3407  
>novel\_mir\_15 Score: 2.5 R03G\_05302  
Query: 1 TCTCCTTTTTCTTTTTCTTTTC 22  
|||\*|||:|||||:|||\*|||  
Sbjct: 965 AGAAGAAGAAGAAGAAG-AAAG 945  
>novel\_mir\_15 Score: 2.5 R03G\_02235  
Query: 1 TCTCCTTTTTCTTTTTCTTTTC 22  
|\*||\*|||:|||||:|||||\*|  
Sbjct: 2771 AAAGAAAAAGAAAAGAAATG 2750  
>novel\_mir\_15 Score: 2.2 R03G\_02244  
Query: 1 TCTCCTTTTTCTTTTTCTTTTC 22  
|||||:|||||:||\*:\*|\*  
Sbjct: 164 AGAGGAAGAAGAAAAGGACGAC 143  
>novel\_mir\_15 Score: 2.5 R03G\_02253  
Query: 1 TCTCCTTTTTCTTTTTCTT-TTC 22  
|||\*|||:|||||:||||\*|||  
Sbjct: 221 AGAAGAAAAAGAAGGAGAAGAAG 199  
>novel\_mir\_15 Score: 2.5 R03G\_02361  
Query: 1 TCTCCTTTTTCTTTTTCTT-TTC 22  
|||\*|||:|||||:||||\*|||  
Sbjct: 167 AGATGAGAAAGAAGAAGAAGAAG 145  
>novel\_mir\_15 Score: 2.5 R03G\_02384  
Query: 1 TCTCCTTTTTCTTTTTCTTTTC 22  
:\*|||:|||||\*|:|  
Sbjct: 1477 GTAGGAAGAAGAAAAG-AGAG 1457  
>novel\_mir\_15 Score: 2.0 R03G\_02549  
Query: 1 TCTCCTTTTTCTTTTTCT-TTTC 22

|||\*|||||||:||||\*|||  
Sbjct: 236 AGAAGAAAAAGAAGAAGACAAAG 214  
>novel\_mir\_15 Score: 2.0 R03G\_02771  
Query: 1 TCTCCTTTTCTTTTCTTTTC 22  
|||\*|||||||:|||||||\*  
Sbjct: 365 AGACGAAAAAGGAAAAGAAAAC 344  
>novel\_mir\_15 Score: 1.8 R03G\_02855  
Query: 1 TCTCCTTTTCTTTTCTT-TTC 22  
|||\*|||||||\*||  
Sbjct: 557 AGAAGAAAAAGAAAAGAAGGAG 535  
>novel\_mir\_15 Score: 1.8 R03G\_02859  
Query: 1 TCTCCTTTTCTTTTCTTTTC 22  
:|\*|||:|||||||  
Sbjct: 721 GGTGGAAGAAGAAAAGAAAAG 700  
>novel\_mir\_15 Score: 2.5 R03G\_02860  
Query: 1 TCTCCTTTTCTTTTCTTTTC 22  
|||\*|||:|||:|||\*|||  
Sbjct: 1052 AGAAGAAAAGGAAGAAGCAAAG 1031  
>novel\_mir\_15 Score: 2.5 R03G\_02991  
Query: 1 TCTCCTTTTCTTTTCTTTTC 22  
|||\*|||:||||:|||:|:|  
Sbjct: 152 AGAAGAAGAAGAAGAAGGAGAG 131  
>novel\_mir\_15 Score: 2.5 R03G\_03024  
Query: 1 TCTCCTTTTCTTTTCTTTT-C 22  
|||\*|||:||||:||||||\*|  
Sbjct: 512 AGAAGAAGAAGAAGAAGAAAATG 490  
>novel\_mir\_15 Score: 2.5 R03G\_03032  
Query: 1 TCTCCTTTTCTTTTCT-TTTC 22  
|||\*|||||||:|||\*|:|  
Sbjct: 728 AGAAGAAAAAGAAGAAGGTAGAG 706  
>novel\_mir\_15 Score: 2.5 R03G\_03103  
Query: 1 TCTCCTTTTCTTTTCTTTTC 22  
|\*||\*|||||||\*|  
Sbjct: 3428 AAAGAAAAAAGAAAAGAAAATG 3407  
>novel\_mir\_15 Score: 2.5 R03G\_03130  
Query: 1 TCTCCTTTTCTTTTCTTTTC 22  
|||\*|||||\*|:|||||||  
Sbjct: 657 AGAAGAAAAAAGAAAGAAAAG 636  
>novel\_mir\_15 Score: 2.5 R03G\_03196  
Query: 1 TCTCCTTTTCTTTTCTTTTC 22  
|\*||||:|||||||\*|\*  
Sbjct: 2620 AAAGGAAGAAGAAAAGAACAC 2599  
>novel\_mir\_15 Score: 1.8 R03G\_03207  
Query: 1 TCTCCTTTTCTTTTCTTTTC 22  
|||\*|||||||\*|||



Sbjct: 190 AGAAGAAAAGAAAAGCGAAG 169  
>novel\_mir\_15 Score: 1.0 R03G\_03214  
Query: 1 TCTCCTTTTCTTTTCTTTTC 22  
|\*|||||||||||||||||

Sbjct: 337 AAAGGAAAAGAAAAGAAAAG 316  
>novel\_mir\_15 Score: 2.5 R03G\_03381  
Query: 1 TCTCCTTTTCTTTTCTT-TTC 22  
|||||||:||||:\*||||\*|||

Sbjct: 1660 AGAGGAAAGAGAAGTAGAAGAAG 1638  
>novel\_mir\_15 Score: 2.5 R03G\_03481  
Query: 1 TCTCCTTTTCTTTTCTTTTC 22  
:|||||:||:||:||:||:|||

Sbjct: 457 GGAGGAGAAGGAGAAGGAGAAG 436  
>novel\_mir\_15 Score: 2.5 R03G\_03532  
Query: 1 TCTCCTTTTCTTTTCTTTTC 22  
\*\*:||||:|||||||||||||

Sbjct: 1657 TTGGGAAGAAGAAAAGAAAAG 1636  
>novel\_mir\_15 Score: 2.5 R03G\_03544  
Query: 1 TCTCCTTTTCTTTTCTT-TTC 22  
|||\*|||:|||||:||||\*|||

Sbjct: 758 AGAAGAAGAAGAAGAAGAAG 736  
>novel\_mir\_15 Score: 2.2 R03G\_03571  
Query: 1 TCTCCTTTTCTTTTCTTTTC 22  
:|||||:||||\*||||\*|||

Sbjct: 378 GGAGGAGAAAGATAAAG-AAAG 358  
>novel\_mir\_15 Score: 2.2 R03G\_03670  
Query: 1 TCTCCTTTTCTTTTCTT-TTC 22  
|\*|||||||||||||:|||\*:||

Sbjct: 217 ATAGGAAAAGAAAAGGAACGAG 195  
>novel\_mir\_15 Score: 2.2 R03G\_03725  
Query: 1 TCTCCTTTTCTTTTCTTTTC 22  
||||||\*|:|||||||||:|\*

Sbjct: 131 AGAGGAACAGGAAAAGAAGAC 110  
>novel\_mir\_15 Score: 2.5 R03G\_03757  
Query: 1 TCTCCTTTTCTTTTCTTTTC 22  
|||\*|||||||||||||\*\*|\*|

Sbjct: 194 AGAAGAAAAGAAAAGTCATG 173  
>novel\_mir\_15 Score: 2.2 R03G\_03908  
Query: 1 TCTCCTTTTCTTTTCTTTTC 22  
||||\*|::|||||||||:|||

Sbjct: 2011 AGAGAAGGAAGAAAAGAGAAG 1990  
>novel\_mir\_15 Score: 2.5 R03G\_03990  
Query: 1 TCTCCTTTTCTTTTCTTTTC 22  
|\*||\*|||||||||||||\*|

Sbjct: 185 AAAGAAAAGAAAAGAAATG 164

>novel\_mir\_15 Score: 2.5 R03G\_04001  
Query: 1 TCTCCTTTTTCTTTTTCTTT-TC 22  
:||\*|||||||:||||:\*\|  
Sbjct: 2444 GGAAGAAAAAGAAGAAGTAG 2422

>novel\_mir\_15 Score: 2.0 R03G\_04037  
Query: 1 TCTCCTTTTTCTTTTTCTTTTC 22  
|\*|||:|||||||\*  
Sbjct: 526 AAAGGAGAAAGAAAAAGAAAAA 505

>novel\_mir\_15 Score: 2.5 R03G\_04112  
Query: 1 TCTCCTTTTTCTTTTTCTT-TTC 22  
|||\*|||:||||:||||\*|||  
Sbjct: 77 AGAAGAAGAAGAAGAAGAAG 55

>novel\_mir\_15 Score: 2.5 R03G\_00164  
Query: 1 TCTCCTTTTTCTTTTTCTTTTC 22  
|||\*\*|||||||\*|||  
Sbjct: 1763 AGATAAAAAAGAAAAAG-AAAG 1743

>novel\_mir\_15 Score: 2.5 R03G\_00192  
Query: 1 TCTCCTTTTTCTTTTTCTTTTC 22  
\*|\*|||||||:||||:|  
Sbjct: 485 TGTGGAAAAAGAAGAAGGG 464

>novel\_mir\_15 Score: 2.5 R03G\_00458  
Query: 1 TCTCCTTTTTCTTTTTCTTTTC 22  
|||\*||:||||:|||||||  
Sbjct: 1462 AGAGAAAGAAGAGGAAGAAAAG 1441

>novel\_mir\_15 Score: 1.8 R03G\_00529  
Query: 1 TCTCCTTTTTCTTTTTCTTTTC 22  
\*||\*|||||||:|||  
Sbjct: 1094 TGAAGAAAAAGAAAAAGAGAAG 1073

>novel\_mir\_15 Score: 2.5 R03G\_00588  
Query: 1 TCTCCTTTTTCTTTTTCTTTTC 22  
|||\*|||||||\*|\*|  
Sbjct: 430 AGAAGAAAAAGAAAAAG-CATG 410

>novel\_mir\_15 Score: 2.0 R03G\_00887  
Query: 1 TCTCCTTTTTCTTTTTCTT-TTC 22  
\*|||||||:|||:||||\*|||  
Sbjct: 785 TGAGGAAAAGGAAGAACAAG 763

>novel\_mir\_15 Score: 2.5 R03G\_00906  
Query: 1 TCTCCTTTTTCTTTTTCTT-TTC 22  
|||\*|||:||||:||||\*|||  
Sbjct: 386 AGAAGAAGAAGAAGAAGAAG 364

>novel\_mir\_15 Score: 2.5 R03G\_00930  
Query: 1 TCTCCTTTTTCTTTTTCTT-TTC 22  
|||\*|||:||||:||||\*|||  
Sbjct: 998 AGAAGAAGAAGAAGAAGAAG 976

>novel\_mir\_15 Score: 2.5 R03G\_00930

Query: 1 TCTCCTTTTTCTTTTTCTTTTC 22  
|||\*|:|||||||:|||\*|  
Sbjct: 29 AGAAGGAAAAGAAAAGGAAATG 8  
>novel\_mir\_15 Score: 1.5 R03G\_00983  
Query: 1 TCTCCTTTTTCTTTTTCTT-TTC 22  
|||||||:|||||:||||\*|||  
Sbjct: 287 AGAGGAAGAAGAAGAAGAAG 265  
>novel\_mir\_15 Score: 2.0 R03G\_00993  
Query: 1 TCTCCTTTTTCTTTTTCTTTTC 22  
|\*|||||:|||||:|||||||  
Sbjct: 835 ATAGGAAGAAGAAGAAAAG 814  
>novel\_mir\_15 Score: 2.0 R03G\_00993  
Query: 1 TCTCCTTTTTCTTTTTCTTTTC 22  
|||\*|||:|||||||\*|||\*  
Sbjct: 730 AGAAGAAGAAGAAAAGAAAAA 709  
>novel\_mir\_15 Score: 1.5 R03G\_00993  
Query: 1 TCTCCTTTTTCTTTTTCTTTTC 22  
|||\*|||||:|||||||\*|||  
Sbjct: 592 AGAAGAAAAGAAAAGAATAG 571  
>novel\_mir\_15 Score: 2.5 R03G\_00993  
Query: 1 TCTCCTTTTTCTTTTTCTTTTC 22  
|\*|||||:|||||||:|||\*|||  
Sbjct: 517 AAAGGAAGAAGAAAAGGAACAG 496  
>novel\_mir\_15 Score: 2.5 R03G\_00993  
Query: 1 TCTCCTTTTTCTTTTTCTTTTC 22  
|||\*|||:|||||||\*|||  
Sbjct: 478 AGAAGAAGAAGAAAAAAAAG 457  
>novel\_mir\_15 Score: 2.5 R03G\_01203  
Query: 1 TCTCCTTTTTCTTTTTCTTTTC 22  
|\*||\*|||||:|||||||\*|||  
Sbjct: 3587 AAAGAAAAAGAAAAGAAATG 3566  
>novel\_mir\_15 Score: 2.5 R03G\_01474  
Query: 1 TCTCCTTTTTCTTTTTCTTTTC 22  
|||\*|||:|||||:|||\*|||  
Sbjct: 361 AGAAGAAGAAGAAGAAG-AAAG 341  
>novel\_mir\_15 Score: 2.5 R03G\_01516  
Query: 1 TCTCCTTTTTCTTTTTCTTTTC 22  
|\*|||||:|||||||\*|||  
Sbjct: 1663 AAAGGAAAGGGAAAAG-AAAG 1643  
>novel\_mir\_15 Score: 2.5 R03G\_01595  
Query: 1 TCTCCTTTTTCTTTTTCTTTTC 22  
||:|||||:|||||:||||:|\*  
Sbjct: 725 AGGGGAAAGAGAAGAAGAGGAA 704  
>novel\_mir\_15 Score: 2.5 R03G\_01661  
Query: 1 TCTCCTTTTTCTTTTTCTT-TTC 22

|||\*|||:||||:||||\*|||  
Sbjct: 1601 AGAAGAAGAAGAAGAAGAAGAAG 1579  
>novel\_mir\_15 Score: 2.5 R03G\_01718  
Query: 1 TCTCCTTTTCTTTTCTTTTC 22  
|\*||\*|||||||\*|||  
Sbjct: 3587 AAAGAAAAAGAAAAAGAAATG 3566  
>novel\_mir\_15 Score: 2.5 R03G\_01774  
Query: 1 TCTCCTTTTCTTTTCTT-TTC 22  
|||\*|||:||||:||||\*|||  
Sbjct: 344 AGAAGAAGAAGAAGAAGAAGAAG 322  
>novel\_mir\_15 Score: 2.5 R03G\_01798  
Query: 1 TCTCCTTTTCTTTTCTT-TTC 22  
||\*||||:||||:||||\*|||  
Sbjct: 224 AGCGGAAGAAGAAGAAGAAGAAG 202  
>novel\_mir\_15 Score: 2.5 R03G\_01918  
Query: 1 TCTCCTTTTCTTTTCTTTTC 22  
||:||||:||||||\*||\*||  
Sbjct: 792 AGGGGAAGAAGAAAAACAATAG 771  
>novel\_mir\_15 Score: 2.5 R03G\_02017  
Query: 1 TCTCCTTTTCTTTTCT-TTTC 22  
|||||:|:|||:|:||\*|||  
Sbjct: 127 AGAGGAGAGAGAGAGAGAAAAAG 105  
>novel\_mir\_15 Score: 2.5 R03G\_02044  
Query: 1 TCTCCTTTTCTTTTCTTTTC 22  
|||\*|||||||:||\*|||  
Sbjct: 1685 AGACGAAAAAGAAGAA-AAAAG 1665  
>novel\_mir\_15 Score: 2.5 R03G\_02044  
Query: 1 TCTCCTTTTCTTTTCTTTTC 22  
||\*||||:||||:||||||\*  
Sbjct: 1189 AGTGAAGAAGAAGAAGAAAAA 1168  
>novel\_mir\_15 Score: 2.2 R03G\_17108  
Query: 1 TCTCCTTTTCTTTTCTTTTC 22  
|||\*|||:|||:||||:|||  
Sbjct: 2411 AGAAGAAGAAGAGAAAGAGAAG 2390  
>novel\_mir\_15 Score: 2.0 R03G\_16999  
Query: 1 TCTCCTTTTCTTTTCTT-TTC 22  
|||\*|||||||:||||\*|||  
Sbjct: 716 AGAAGAAAAAGAAGAAGAAGAAG 694  
>novel\_mir\_67 Score: 2.2 R03G\_13954  
Query: 1 TACAGCGGCTTCTTTCAGACTT 22  
|\*||:|||||||\*|||:  
Sbjct: 651 AAGTTGCCGAAGAAAGTGTGAG 630  
>novel\_mir\_67 Score: 0.5 R03G\_08467  
Query: 1 TACAGCGGCTTCTTTCAGACTT 22  
||||||:|||||||

Sbjct: 811 ATGTCGCTGAAGAAAGTCTGAA 790  
>novel\_mir\_67 Score: 0.0 R03G\_07834  
Query: 1 TACAGCGGCTTCTTTCAGACTT 22  
|||||

Sbjct: 1171 ATGTCGCCGAAGAAAGTCTGAA 1150  
>novel\_mir\_122 Score: 2.2 R03G\_17256  
Query: 1 TGCATCTGCTGCTGCTGTTG 20  
|||\*\*|||||:|

Sbjct: 362 ACGACGACGACGACGACGAC 343  
>novel\_mir\_122 Score: 2.2 R03G\_17248  
Query: 1 TGCATCTGCTGCTGCTGTTG 20  
|||\*\*|||||:|

Sbjct: 368 ACGACGACGACGACGACGAC 349  
>novel\_mir\_122 Score: 2.5 R03G\_17074  
Query: 1 TGCATCTGCTGCTGCTGTTG 20  
|||\*\*|||||:|

Sbjct: 235 ACGACGACGACGACGACGAT 216  
>novel\_mir\_122 Score: 2.2 R03G\_16748  
Query: 1 TGCATCTGCTGCTGCTGTTG 20  
|||\*\*|||||:|

Sbjct: 338 ACGACGACGACGACGACGAC 319  
>novel\_mir\_122 Score: 0.0 R03G\_16618  
Query: 1 TGCATCTGCTGCTGCTGTTG 20  
|||||

Sbjct: 2282 ACGTAGACGACGACGACAAC 2263  
>novel\_mir\_122 Score: 2.0 R03G\_16404  
Query: 1 TGCATCTGCTGCTGCTGTTG 20  
|||\*\*|||||

Sbjct: 677 ACGACGACGACGACGACAAC 658  
>novel\_mir\_122 Score: 2.2 R03G\_16137  
Query: 1 TGCATCTGCTGCTGCTGTTG 20  
|||\*\*|||||:|

Sbjct: 362 ACGACGACGACGACGACGAC 343  
>novel\_mir\_122 Score: 2.0 R03G\_16262  
Query: 1 TGCATCTGCTGCTGCTGTTG 20  
|||\*\*|||||

Sbjct: 178 ACGACGACGACGACGACAAC 159  
>novel\_mir\_122 Score: 1.2 R03G\_16322  
Query: 1 TGCATCTGCTGCTGCTGTTG 20  
:|\*|||||

Sbjct: 809 GCGAAGACGACGACGACAAC 790  
>novel\_mir\_122 Score: 2.2 R03G\_16337  
Query: 1 TGCATCTGCTGCTGCTGTTG 20  
|||\*\*|||||:|

Sbjct: 902 ACGACGACGACGACGACGAC 883

>novel\_mir\_122 Score: 2.2 R03G\_15890  
Query: 1 TGCATCTGCTGCTGCTGTTG 20  
|||\*\*|||||||||||||:|  
Sbjct: 362 ACGACGACGACGACGACGAC 343  
>novel\_mir\_122 Score: 2.2 R03G\_15897  
Query: 1 TGCATCTGCTGCTGCTGTTG 20  
|||\*\*|||||||||||||:|  
Sbjct: 338 ACGACGACGACGACGACGAC 319  
>novel\_mir\_122 Score: 2.2 R03G\_15919  
Query: 1 TGCATCTGCTGCTGCTGTTG 20  
|||\*\*|||||||||||||:|  
Sbjct: 827 ACGACGACGACGACGACGAC 808  
>novel\_mir\_122 Score: 2.2 R03G\_15986  
Query: 1 TGCATCTGCTGCTGCTGTTG 20  
|||\*\*|||||||||||||:|  
Sbjct: 1631 ACGACGACGACGACGACGAC 1612  
>novel\_mir\_122 Score: 2.0 R03G\_15357  
Query: 1 TGCATCTGCTGCTGCTGTTG 20  
|||\*\*|||||||||||||  
Sbjct: 1074 ACGACGACGACGACGACAAC 1055  
>novel\_mir\_122 Score: 2.2 R03G\_15422  
Query: 1 TGCATCTGCTGCTGCTGTTG 20  
|||\*\*|||||||||||||:|  
Sbjct: 1255 ACGACGACGACGACGACAGC 1236  
>novel\_mir\_122 Score: 2.5 R03G\_14833  
Query: 1 TGCATCTGCTGCTGCTGTTG 20  
\*\*||:|||||||||||||:|  
Sbjct: 870 TGGTGGACGACGACGACGAT 851  
>novel\_mir\_122 Score: 2.5 R03G\_15039  
Query: 1 TGCATCTGCTGCTGCTGTTG 20  
|||\*\*|||||||||||||:|  
Sbjct: 757 ACGATGACGACGACGACGAT 738  
>novel\_mir\_122 Score: 2.2 R03G\_14409  
Query: 1 TGCATCTGCTGCTGCTGTTG 20  
|||\*\*|||||||||||||:|  
Sbjct: 722 ACGACGACGACGACGACGAC 703  
>novel\_mir\_122 Score: 2.2 R03G\_14420  
Query: 1 TGCATCTGCTGCTGCTGTTG 20  
|||\*\*|||||||||||||:|  
Sbjct: 1397 ACGACGACGACGACGACGAC 1378  
>novel\_mir\_122 Score: 2.2 R03G\_14551  
Query: 1 TGCATCTGCTGCTGCTGTTG 20  
|||\*\*|||||||||||||:|  
Sbjct: 338 ACGACGACGACGACGACGAC 319  
>novel\_mir\_122 Score: 2.2 R03G\_14665

Query: 1 TGCATCTGCTGCTGCTGTTG 20  
|||\*\*|||||||:|  
Sbjct: 1034 ACGACGACGACGACGAC 1015  
>novel\_mir\_122 Score: 2.2 R03G\_14665  
Query: 1 TGCATCTGCTGCTGCTGTTG 20  
|||\*\*|||||||:|  
Sbjct: 891 ACGACGACGACGACGAC 872  
>novel\_mir\_122 Score: 2.2 R03G\_14008  
Query: 1 TGCATCTGCTGCTGCTGTTG 20  
|||\*\*|||||||:|  
Sbjct: 688 ACGACGACGACGACGAC 669  
>novel\_mir\_122 Score: 2.5 R03G\_14008  
Query: 1 TGCATCTGCTGCTGCTGTTG 20  
|||\*\*|||||||:|  
Sbjct: 610 ACGATGACGACGACGACGAT 591  
>novel\_mir\_122 Score: 2.2 R03G\_14008  
Query: 1 TGCATCTGCTGCTGCTGTTG 20  
|||\*\*|||||||:|  
Sbjct: 520 ACGATGACGACGACGACGAC 501  
>novel\_mir\_122 Score: 2.2 R03G\_14199  
Query: 1 TGCATCTGCTGCTGCTGTTG 20  
|||\*\*|||||||:|  
Sbjct: 3398 ACGACGACGACGACGAC 3379  
>novel\_mir\_122 Score: 2.2 R03G\_14199  
Query: 1 TGCATCTGCTGCTGCTGTTG 20  
|||\*\*|||||||:|  
Sbjct: 3329 ACGACGACGACGACGAC 3310  
>novel\_mir\_122 Score: 2.0 R03G\_14274  
Query: 1 TGCATCTGCTGCTGCTGTTG 20  
|||\*\*|||||||:|  
Sbjct: 245 ACGACGACGACGACGACAAC 226  
>novel\_mir\_122 Score: 2.2 R03G\_13348  
Query: 1 TGCATCTGCTGCTGCTGTTG 20  
|||\*\*|||||||:|  
Sbjct: 429 ACGACGACGACGACGACGAC 410  
>novel\_mir\_122 Score: 2.5 R03G\_13425  
Query: 1 TGCATCTGCTGCTGCTGTTG 20  
|:|\*||:|||||||:|  
Sbjct: 1807 ATGTTGATGACGACGACGAT 1788  
>novel\_mir\_122 Score: 2.5 R03G\_13611  
Query: 1 TGCATCTGCTGCTGCTGTTG 20  
|||\*\*|||||||:|  
Sbjct: 759 ACGACGACGACGACGACGGC 740  
>novel\_mir\_122 Score: 2.0 R03G\_13648  
Query: 1 TGCATCTGCTGCTGCTGTTG 20

||\*\*|||||||||||||||||  
Sbjct: 737 ACTGAGACGACGACGACAAC 718  
>novel\_mir\_122 Score: 1.8 R03G\_12743  
Query: 1 TGCATCTGCTGCTGCTGTTG 20  
||\*||||||||||||||:|\*  
Sbjct: 584 ACTTAGACGACGACGACGAG 565  
>novel\_mir\_122 Score: 2.5 R03G\_12895  
Query: 1 TGCATCTGCTGCTGCTGTTG 20  
\*|\*\*|||||||||||||||||  
Sbjct: 722 CCACAGACGACGACGACAAC 703  
>novel\_mir\_122 Score: 2.0 R03G\_12904  
Query: 1 TGCATCTGCTGCTGCTGTTG 20  
|||\*\*|||||||||||||||||  
Sbjct: 839 ACGACGACGACGACGACAAC 820  
>novel\_mir\_122 Score: 2.2 R03G\_13062  
Query: 1 TGCATCTGCTGCTGCTGTTG 20  
:|\*||||||||||||||:|\*  
Sbjct: 89 GCGGAGACGACGACGACGTT 70  
>novel\_mir\_122 Score: 2.2 R03G\_13146  
Query: 1 TGCATCTGCTGCTGCTGTTG 20  
|||\*\*||||||||||||||:|  
Sbjct: 362 ACGACGACGACGACGACGAC 343  
>novel\_mir\_122 Score: 2.5 R03G\_13230  
Query: 1 TGCATCTGCTGCTGCTGTTG 20  
||\*|:|:|\*|||||||||\*||  
Sbjct: 70 ACTTGGATGACGACGACTAC 51  
>novel\_mir\_122 Score: 2.2 R03G\_11977  
Query: 1 TGCATCTGCTGCTGCTGTTG 20  
|||\*\*||||||||||||||:|  
Sbjct: 302 ACGACGACGACGACGACGAC 283  
>novel\_mir\_122 Score: 2.2 R03G\_12090  
Query: 1 TGCATCTGCTGCTGCTGTTG 20  
\*|\*||||||||||||||:|  
Sbjct: 1632 TTGAAGACGACGACGACGAC 1613  
>novel\_mir\_122 Score: 2.5 R03G\_12158  
Query: 1 TGCATCTGCTGCTGCTGTTG 20  
|||\*\*||||||||||||||:|  
Sbjct: 219 ACGACGACGACGACGACGAT 200  
>novel\_mir\_122 Score: 2.2 R03G\_12347  
Query: 1 TGCATCTGCTGCTGCTGTTG 20  
|||\*\*||||||||||||||:|  
Sbjct: 311 ACGACGACGACGACGACGAC 292  
>novel\_mir\_122 Score: 2.5 R03G\_12347  
Query: 1 TGCATCTGCTGCTGCTGTTG 20  
\*\*|||||||||||||\*|||||



Sbjct: 221 TAGTAGACGACGACTACAAC 202  
>novel\_mir\_122 Score: 2.5 R03G\_11114  
Query: 1 TGCATCTGCTGCTGCTGTTG 20  
||||\*|:|||||||\*::  
Sbjct: 390 ACGTAAATGACGACGAC-GT 372  
>novel\_mir\_122 Score: 2.0 R03G\_11158  
Query: 1 TGCATCTGCTGCTGCTGTTG 20  
|||\*\*|||||||  
Sbjct: 74 ACGACGACGACGACGACAAC 55  
>novel\_mir\_122 Score: 2.2 R03G\_11166  
Query: 1 TGCATCTGCTGCTGCTGTTG 20  
|||\*\*|||||||:|  
Sbjct: 590 ACGACGACGACGACGACGAC 571  
>novel\_mir\_122 Score: 2.2 R03G\_11166  
Query: 1 TGCATCTGCTGCTGCTGTTG 20  
||||\*\*|||||||:|  
Sbjct: 524 ACGTTAACGACGACGACGAC 505  
>novel\_mir\_122 Score: 2.2 R03G\_11236  
Query: 1 TGCATCTGCTGCTGCTGTTG 20  
|||\*\*|||||||:|  
Sbjct: 380 ACGACGACGACGACGACGAC 361  
>novel\_mir\_122 Score: 2.2 R03G\_11253  
Query: 1 TGCATCTGCTGCTGCTGTTG 20  
||||\*\*|||||||:|  
Sbjct: 465 ACGATGACGACGACGACGAC 446  
>novel\_mir\_122 Score: 2.2 R03G\_11464  
Query: 1 TGCATCTGCTGCTGCTGTTG 20  
\*|||||||\*|  
Sbjct: 641 TCGTAGACGACGACGAGTGC 622  
>novel\_mir\_122 Score: 2.2 R03G\_11507  
Query: 1 TGCATCTGCTGCTGCTGTTG 20  
|||\*\*|||||||:|  
Sbjct: 591 ACGACGACGACGACGACGAC 572  
>novel\_mir\_122 Score: 2.2 R03G\_11537  
Query: 1 TGCATCTGCTGCTGCTGTTG 20  
|||\*\*|||||||:|  
Sbjct: 380 ACGACGACGACGACGACGAC 361  
>novel\_mir\_122 Score: 2.0 R03G\_11868  
Query: 1 TGCATCTGCTGCTGCTGTTG 20  
|||\*\*|||||||  
Sbjct: 1664 ACGACGACGACGACGACAAC 1645  
>novel\_mir\_122 Score: 2.2 R03G\_11907  
Query: 1 TGCATCTGCTGCTGCTGTTG 20  
|||\*\*|||||||:|  
Sbjct: 221 ACGACGACGACGACGACGAC 202

>novel\_mir\_122 Score: 2.2 R03G\_10309  
Query: 1 TGCATCTGCTGCTGCTGTTG 20  
|||\*\*|||||||||||:|  
Sbjct: 602 ACGACGACGACGACGACGAC 583  
>novel\_mir\_122 Score: 2.0 R03G\_10396  
Query: 1 TGCATCTGCTGCTGCTGTTG 20  
|||\*\*|||||||||||  
Sbjct: 431 ACGACGACGACGACGACAAC 412  
>novel\_mir\_122 Score: 2.5 R03G\_10401  
Query: 1 TGCATCTGCTGCTGCTGTTG 20  
||||\*|||||||\*|||\*|  
Sbjct: 1814 ACGTAAACGACGACAACATC 1795  
>novel\_mir\_122 Score: 2.5 R03G\_10568  
Query: 1 TGCATCTGCTGCTGCTGTTG 20  
\*:||\*|||||||||:||||  
Sbjct: 2013 TTGTCGACGACGACGGCAAC 1994  
>novel\_mir\_122 Score: 2.0 R03G\_10815  
Query: 1 TGCATCTGCTGCTGCTGTTG 20  
|||\*\*|||||||||||  
Sbjct: 2600 ACGACGACGACGACGACAAC 2581  
>novel\_mir\_122 Score: 2.5 R03G\_10815  
Query: 1 TGCATCTGCTGCTGCTGTTG 20  
\*|||||\*\*|||||||||  
Sbjct: 2438 CCGTAGAAAACGACGACAAC 2419  
>novel\_mir\_122 Score: 2.0 R03G\_10831  
Query: 1 TGCATCTGCTGCTGCTGTTG 20  
|||\*\*|||||||||||  
Sbjct: 1109 ACGACGACGACGACGACAAC 1090  
>novel\_mir\_122 Score: 2.0 R03G\_10851  
Query: 1 TGCATCTGCTGCTGCTGTTG 20  
|||\*\*|||||||||||  
Sbjct: 356 ACGACGACGACGACGACAAC 337  
>novel\_mir\_122 Score: 2.2 R03G\_10926  
Query: 1 TGCATCTGCTGCTGCTGTTG 20  
||||\*||:|||||||:|\*  
Sbjct: 880 ACGTTGATGACGACGACGAA 861  
>novel\_mir\_122 Score: 2.2 R03G\_09602  
Query: 1 TGCATCTGCTGCTGCTGTTG 20  
|||\*\*|||||||||||:|  
Sbjct: 338 ACGACGACGACGACGACGAC 319  
>novel\_mir\_122 Score: 2.2 R03G\_09603  
Query: 1 TGCATCTGCTGCTGCTGTTG 20  
|||\*\*|||||||||||:|  
Sbjct: 380 ACGACGACGACGACGACGAC 361  
>novel\_mir\_122 Score: 2.0 R03G\_09721

Query: 1 TGCATCTGCTGCTGCTGTTG 20  
|||\*\*|||||||  
Sbjct: 620 ACGACGACGACGACGACAAC 601  
>novel\_mir\_122 Score: 2.2 R03G\_09929  
Query: 1 TGCATCTGCTGCTGCTGTTG 20  
|||\*\*|||||||:|  
Sbjct: 338 ACGACGACGACGACGACGAC 319  
>novel\_mir\_122 Score: 2.2 R03G\_10041  
Query: 1 TGCATCTGCTGCTGCTGTTG 20  
|||\*\*|||||||:|  
Sbjct: 368 ACGACGACGACGACGACGAC 349  
>novel\_mir\_122 Score: 2.2 R03G\_10199  
Query: 1 TGCATCTGCTGCTGCTGTTG 20  
\*|||\*|||||||:|\*|  
Sbjct: 57 TCGTCGACGACGACGACGTC 38  
>novel\_mir\_122 Score: 2.2 R03G\_07981  
Query: 1 TGCATCTGCTGCTGCTGTTG 20  
|||\*\*|||||||:|  
Sbjct: 338 ACGACGACGACGACGACGAC 319  
>novel\_mir\_122 Score: 2.5 R03G\_08102  
Query: 1 TGCATCTGCTGCTGCTGTTG 20  
:\*|||||:|||||:|:|  
Sbjct: 861 GAGTAGACGGCGACGGCGAC 842  
>novel\_mir\_122 Score: 2.2 R03G\_08359  
Query: 1 TGCATCTGCTGCTGCTGTTG 20  
|||\*\*|||||||:|  
Sbjct: 1119 ACGACGACGACGACGACGAC 1100  
>novel\_mir\_122 Score: 2.5 R03G\_08704  
Query: 1 TGCATCTGCTGCTGCTGTTG 20  
||\*|\*|||||||:|  
Sbjct: 1980 ACATCGACGACGACGACGGC 1961  
>novel\_mir\_122 Score: 2.2 R03G\_08727  
Query: 1 TGCATCTGCTGCTGCTGTTG 20  
|||\*\*|||||||:|  
Sbjct: 122 ACGACGACGACGACGACGAC 103  
>novel\_mir\_122 Score: 2.0 R03G\_08774  
Query: 1 TGCATCTGCTGCTGCTGTTG 20  
|||\*\*|||||||  
Sbjct: 245 ACGACGACGACGACGACAAC 226  
>novel\_mir\_122 Score: 2.2 R03G\_08784  
Query: 1 TGCATCTGCTGCTGCTGTTG 20  
|||\*\*|||||||:|  
Sbjct: 666 ACGACGACGACGACGACGAC 647  
>novel\_mir\_122 Score: 2.2 R03G\_08982  
Query: 1 TGCATCTGCTGCTGCTGTTG 20

|||\*\*|||||||:|  
Sbjct: 275 ACGACGACGACGACGACGAC 256  
>novel\_mir\_122 Score: 2.5 R03G\_08982  
Query: 1 TGCATCTGCTGCTGCTGTTG 20  
\*||\*\*|||||||  
Sbjct: 104 CCGACGACGACGACGACAAC 85  
>novel\_mir\_122 Score: 2.0 R03G\_09029  
Query: 1 TGCATCTGCTGCTGCTGTTG 20  
|||\*\*|||||||  
Sbjct: 2351 ACGACGACGACGACGACAAC 2332  
>novel\_mir\_122 Score: 2.0 R03G\_09085  
Query: 1 TGCATCTGCTGCTGCTGTTG 20  
|||\*\*|||||||  
Sbjct: 821 ACGACGACGACGACGACAAC 802  
>novel\_mir\_122 Score: 2.5 R03G\_09129  
Query: 1 TGCATCTGCTGCTGCTGTTG 20  
|\*||||||\*||||||\*|  
Sbjct: 762 AGGTAGACGAGGACGACATC 743  
>novel\_mir\_122 Score: 2.2 R03G\_09182  
Query: 1 TGCATCTGCTGCTGCTGTTG 20  
|||\*\*|||||||:|  
Sbjct: 344 ACGACGACGACGACGACGAC 325  
>novel\_mir\_122 Score: 2.2 R03G\_06730  
Query: 1 TGCATCTGCTGCTGCTGTTG 20  
|||\*\*|||||||:|  
Sbjct: 338 ACGACGACGACGACGACGAC 319  
>novel\_mir\_122 Score: 2.0 R03G\_06990  
Query: 1 TGCATCTGCTGCTGCTGTTG 20  
||||\*|||\*|||||||  
Sbjct: 311 ACGTCGACAACGACGACAAC 292  
>novel\_mir\_122 Score: 2.2 R03G\_07012  
Query: 1 TGCATCTGCTGCTGCTGTTG 20  
|||\*\*|||||||:|  
Sbjct: 569 ACGACGACGACGACGACGAC 550  
>novel\_mir\_122 Score: 2.5 R03G\_07164  
Query: 1 TGCATCTGCTGCTGCTGTTG 20  
||\*|:||||||\*|||||||  
Sbjct: 1178 ACTTGGACGACAACGACAAC 1159  
>novel\_mir\_122 Score: 2.0 R03G\_07234  
Query: 1 TGCATCTGCTGCTGCTGTTG 20  
|||\*\*|||||||  
Sbjct: 311 ACGACGACGACGACGACAAC 292  
>novel\_mir\_122 Score: 2.2 R03G\_07266  
Query: 1 TGCATCTGCTGCTGCTGTTG 20  
|||\*\*|||||||:|

Sbjct: 2472 ACGACGACGACGACGACGAC 2453  
>novel\_mir\_122 Score: 2.5 R03G\_07281  
Query: 1 TGCATCTGCTGCTGCTGTTG 20  
|||\*\*|||||||||||:||||  
Sbjct: 453 ACGACGACGACGACGGCAAC 434  
>novel\_mir\_122 Score: 2.2 R03G\_07306  
Query: 1 TGCATCTGCTGCTGCTGTTG 20  
|||\*\*|||||||||||:||  
Sbjct: 338 ACGACGACGACGACGACGAC 319  
>novel\_mir\_122 Score: 2.0 R03G\_07466  
Query: 1 TGCATCTGCTGCTGCTGTTG 20  
|||\*\*|||||||||||  
Sbjct: 1760 ACGACGACGACGACGACAAC 1741  
>novel\_mir\_122 Score: 2.2 R03G\_07696  
Query: 1 TGCATCTGCTGCTGCTGTTG 20  
|||\*\*|||||||||||:||  
Sbjct: 338 ACGACGACGACGACGACGAC 319  
>novel\_mir\_122 Score: 2.2 R03G\_07720  
Query: 1 TGCATCTGCTGCTGCTGTTG 20  
|||\*\*|||||||||||:||  
Sbjct: 338 ACGACGACGACGACGACGAC 319  
>novel\_mir\_122 Score: 2.2 R03G\_07738  
Query: 1 TGCATCTGCTGCTGCTGTTG 20  
|||\*\*|||||||||||:||  
Sbjct: 380 ACGACGACGACGACGACGAC 361  
>novel\_mir\_122 Score: 2.0 R03G\_07933  
Query: 1 TGCATCTGCTGCTGCTGTTG 20  
|||\*\*|||||||||||  
Sbjct: 437 ACGACGACGACGACGACAAC 418  
>novel\_mir\_122 Score: 2.0 R03G\_07933  
Query: 1 TGCATCTGCTGCTGCTGTTG 20  
|||\*\*|||||||||||  
Sbjct: 365 ACGACGACGACGACGACAAC 346  
>novel\_mir\_122 Score: 2.0 R03G\_05582  
Query: 1 TGCATCTGCTGCTGCTGTTG 20  
|||\*\*|||||||||||  
Sbjct: 794 ACGACGACGACGACGACAAC 775  
>novel\_mir\_122 Score: 2.2 R03G\_05586  
Query: 1 TGCATCTGCTGCTGCTGTTG 20  
|||\*\*|||||||||||:||  
Sbjct: 743 ACGACGACGACGACGACGAC 724  
>novel\_mir\_122 Score: 2.5 R03G\_05593  
Query: 1 TGCATCTGCTGCTGCTGTTG 20  
::||\*|||||||||||::||  
Sbjct: 7464 GTGTTGACGACGACGATGAC 7445

>novel\_mir\_122 Score: 2.5 R03G\_06078  
Query: 1 TGCATCTGCTGCTGCTGTTG 20  
\*\*||||\*|||||||  
Sbjct: 1958 TAGTACACGACGACGACAAC 1939  
>novel\_mir\_122 Score: 2.5 R03G\_06139  
Query: 1 TGCATCTGCTGCTGCTGTTG 20  
:||||\*|||||\*|||||:|  
Sbjct: 566 GCGTAAACGACAACGACGAC 547  
>novel\_mir\_122 Score: 2.5 R03G\_06155  
Query: 1 TGCATCTGCTGCTGCTGTTG 20  
|||\*\*|||||||\*  
Sbjct: 299 ACGACGACGACGACGACAAA 280  
>novel\_mir\_122 Score: 2.5 R03G\_06190  
Query: 1 TGCATCTGCTGCTGCTGTTG 20  
\*||\*\*|||||||  
Sbjct: 864 CCGACGACGACGACGACAAC 845  
>novel\_mir\_122 Score: 2.5 R03G\_06225  
Query: 1 TGCATCTGCTGCTGCTGTTG 20  
||||\*||\*|||||||\*  
Sbjct: 4526 ACGTAAACAACGACGACAAA 4507  
>novel\_mir\_122 Score: 2.0 R03G\_06238  
Query: 1 TGCATCTGCTGCTGCTGTTG 20  
|||\*\*|||||||  
Sbjct: 749 ACGACGACGACGACGACAAC 730  
>novel\_mir\_122 Score: 2.5 R03G\_06536  
Query: 1 TGCATCTGCTGCTGCTGTTG 20  
|||\*\*|||||||\*||  
Sbjct: 440 ACGACGACGACGACGACTAC 421  
>novel\_mir\_122 Score: 2.0 R03G\_06599  
Query: 1 TGCATCTGCTGCTGCTGTTG 20  
|||\*\*|||||||  
Sbjct: 401 ACGACGACGACGACGACAAC 382  
>novel\_mir\_122 Score: 2.2 R03G\_06612  
Query: 1 TGCATCTGCTGCTGCTGTTG 20  
||||\*|||||\*|||||:|  
Sbjct: 1428 ACGTTGACGAGGACGACGAC 1409  
>novel\_mir\_122 Score: 2.2 R03G\_06631  
Query: 1 TGCATCTGCTGCTGCTGTTG 20  
|||\*\*|||||||:|  
Sbjct: 3156 ACGACGACGACGACGACGAC 3137  
>novel\_mir\_122 Score: 2.0 R03G\_06631  
Query: 1 TGCATCTGCTGCTGCTGTTG 20  
|||\*\*|||||||  
Sbjct: 2993 ACGACGACGACGACGACAAC 2974  
>novel\_mir\_122 Score: 2.0 R03G\_06665

Query: 1 TGCATCTGCTGCTGCTGTTG 20  
|||\*\*||||||||||||||  
Sbjct: 746 ACGACGACGACGACGACAAC 727  
>novel\_mir\_122 Score: 2.2 R03G\_04287  
Query: 1 TGCATCTGCTGCTGCTGTTG 20  
|||\*\*||||||||||||||:|  
Sbjct: 1790 ACGACGACGACGACGACGAC 1771  
>novel\_mir\_122 Score: 2.2 R03G\_04325  
Query: 1 TGCATCTGCTGCTGCTGTTG 20  
|||\*\*||||||||||||||:|  
Sbjct: 668 ACGACGACGACGACGACGAC 649  
>novel\_mir\_122 Score: 2.5 R03G\_04345  
Query: 1 TGCATCTGCTGCTGCTGTTG 20  
\*|||||\*|||||||:\*\*\*|  
Sbjct: 3009 TCGTAGAAGACGACGAT-AC 2991  
>novel\_mir\_122 Score: 2.0 R03G\_04522  
Query: 1 TGCATCTGCTGCTGCTGTTG 20  
||\*\*||||||||||||||  
Sbjct: 1565 ACACAGACGACGACGACAAC 1546  
>novel\_mir\_122 Score: 2.0 R03G\_04562  
Query: 1 TGCATCTGCTGCTGCTGTTG 20  
|||\*\*||||||||||||||  
Sbjct: 2228 ACGACGACGACGACGACAAC 2209  
>novel\_mir\_122 Score: 2.5 R03G\_04575  
Query: 1 TGCATCTGCTGCTGCTGTTG 20  
|||\*\*||||||||||||||:|  
Sbjct: 148 ACGACGACGACGACGACGAT 129  
>novel\_mir\_122 Score: 2.0 R03G\_04604  
Query: 1 TGCATCTGCTGCTGCTGTTG 20  
|||\*\*||||||||||||||  
Sbjct: 151 ACGACGACGACGACGACAAC 132  
>novel\_mir\_122 Score: 2.2 R03G\_04679  
Query: 1 TGCATCTGCTGCTGCTGTTG 20  
|||\*\*||||||||||||||:|  
Sbjct: 308 ACGACGACGACGACGACGAC 289  
>novel\_mir\_122 Score: 1.8 R03G\_04733  
Query: 1 TGCATCTGCTGCTGCTGTTG 20  
|\*||:||||||||||||||:|  
Sbjct: 1310 AGGTGGACGACGACGACGAC 1291  
>novel\_mir\_122 Score: 2.0 R03G\_05007  
Query: 1 TGCATCTGCTGCTGCTGTTG 20  
|\*||||:||||||||||||||\*|  
Sbjct: 1416 AAGTAGGCGACGACGACATC 1397  
>novel\_mir\_122 Score: 2.0 R03G\_05230  
Query: 1 TGCATCTGCTGCTGCTGTTG 20

|||\*\*|||||||  
Sbjct: 3539 ACGACGACGACGACGACAAC 3520  
>novel\_mir\_122 Score: 2.2 R03G\_05308  
Query: 1 TGCATCTGCTGCTGCTGTTG 20  
|||\*\*|||||||:  
Sbjct: 1469 ACGACGACGACGACGACGAC 1450  
>novel\_mir\_122 Score: 2.0 R03G\_05396  
Query: 1 TGCATCTGCTGCTGCTGTTG 20  
|||\*\*|||||||  
Sbjct: 1370 ACGACGACGACGACGACAAC 1351  
>novel\_mir\_122 Score: 2.5 R03G\_05396  
Query: 1 TGCATCTGCTGCTGCTGTTG 20  
\*||||\*||\*|||||||  
Sbjct: 719 TCGTAAACAACGACGACAAC 700  
>novel\_mir\_122 Score: 1.8 R03G\_05425  
Query: 1 TGCATCTGCTGCTGCTGTTG 20  
|||\*|||||||:~|  
Sbjct: 365 ACGAAGACGACGACGACGTC 346  
>novel\_mir\_122 Score: 2.2 R03G\_02228  
Query: 1 TGCATCTGCTGCTGCTGTTG 20  
|||\*\*|||||||:  
Sbjct: 338 ACGACGACGACGACGACGAC 319  
>novel\_mir\_122 Score: 2.0 R03G\_02252  
Query: 1 TGCATCTGCTGCTGCTGTTG 20  
|||\*\*|||||||  
Sbjct: 350 ACGACGACGACGACGACAAC 331  
>novel\_mir\_122 Score: 2.5 R03G\_02434  
Query: 1 TGCATCTGCTGCTGCTGTTG 20  
\*~\*||\*|||||||  
Sbjct: 251 CCATAAACGACGACGACAAC 232  
>novel\_mir\_122 Score: 2.0 R03G\_02518  
Query: 1 TGCATCTGCTGCTGCTGTTG 20  
|||\*\*|||||||  
Sbjct: 539 ACGACGACGACGACGACAAC 520  
>novel\_mir\_122 Score: 2.2 R03G\_03130  
Query: 1 TGCATCTGCTGCTGCTGTTG 20  
|||\*\*|||||||:  
Sbjct: 41 ACGACGACGACGACGACGAC 22  
>novel\_mir\_122 Score: 2.2 R03G\_03212  
Query: 1 TGCATCTGCTGCTGCTGTTG 20  
||\*~\*|||||||:  
Sbjct: 179 ACATTGACGACGACGACGAC 160  
>novel\_mir\_122 Score: 2.2 R03G\_03219  
Query: 1 TGCATCTGCTGCTGCTGTTG 20  
|||\*\*|||||||:  
|||\*\*|||||||:



Sbjct: 828 ACGACGACGACGACGACGAC 809  
>novel\_mir\_122 Score: 2.0 R03G\_03416  
Query: 1 TGCATCTGCTGCTGCTGTTG 20  
|||||||:\*|||||||\*  
Sbjct: 900 ACGTAGATCACGACGACAAG 881  
>novel\_mir\_122 Score: 2.2 R03G\_03584  
Query: 1 TGCATCTGCTGCTGCTGTTG 20  
|||\*\*|||||||:|  
Sbjct: 296 ACGACGACGACGACGACGAC 277  
>novel\_mir\_122 Score: 2.0 R03G\_03857  
Query: 1 TGCATCTGCTGCTGCTGTTG 20  
|||\*\*|||||||  
Sbjct: 440 ACGACGACGACGACGACAAC 421  
>novel\_mir\_122 Score: 1.2 R03G\_04003  
Query: 1 TGCATCTGCTGCTGCTGTTG 20  
||\*|||||||:|  
Sbjct: 1898 ACTTAGACGACGACGACGAC 1879  
>novel\_mir\_122 Score: 2.5 R03G\_04003  
Query: 1 TGCATCTGCTGCTGCTGTTG 20  
\*||\*||\*|||||||  
Sbjct: 1103 TCGAAAACGACGACGACAAC 1084  
>novel\_mir\_122 Score: 2.2 R03G\_04211  
Query: 1 TGCATCTGCTGCTGCTGTTG 20  
|||\*\*|||||||:|  
Sbjct: 338 ACGACGACGACGACGACGAC 319  
>novel\_mir\_122 Score: 2.0 R03G\_00028  
Query: 1 TGCATCTGCTGCTGCTGTTG 20  
|||\*\*|||||||  
Sbjct: 392 ACGACGACGACGACGACAAC 373  
>novel\_mir\_122 Score: 0.0 R03G\_00202  
Query: 1 TGCATCTGCTGCTGCTGTTG 20  
|||||||  
Sbjct: 600 ACGTAGACGACGACGACAAC 581  
>novel\_mir\_122 Score: 2.5 R03G\_00219  
Query: 1 TGCATCTGCTGCTGCTGTTG 20  
|||\*\*|||||||\*|  
Sbjct: 1973 ACGACGACGACGACGACATC 1954  
>novel\_mir\_122 Score: 2.2 R03G\_00288  
Query: 1 TGCATCTGCTGCTGCTGTTG 20  
|||\*\*|||||||:|  
Sbjct: 356 ACGACGACGACGACGACGAC 337  
>novel\_mir\_122 Score: 2.0 R03G\_00357  
Query: 1 TGCATCTGCTGCTGCTGTTG 20  
|||\*\*|||||||  
Sbjct: 398 ACGACGACGACGACGACAAC 379

>novel\_mir\_122 Score: 2.0 R03G\_00501  
Query: 1 TGCATCTGCTGCTGCTGTTG 20  
|||\*\*|||||||||||||||  
Sbjct: 122 ACGACGACGACGACGACAAC 103  
>novel\_mir\_122 Score: 2.2 R03G\_00578  
Query: 1 TGCATCTGCTGCTGCTGTTG 20  
|||\*\*|||||||||||||:|  
Sbjct: 1355 ACGACGACGACGACGACGAC 1336  
>novel\_mir\_122 Score: 2.2 R03G\_00600  
Query: 1 TGCATCTGCTGCTGCTGTTG 20  
:||\*\*|||||||||||||||  
Sbjct: 287 GCGACGACGACGACGACAAC 268  
>novel\_mir\_122 Score: 2.0 R03G\_00640  
Query: 1 TGCATCTGCTGCTGCTGTTG 20  
|||\*\*|||||||||||||||  
Sbjct: 1361 ACGACGACGACGACGACAAC 1342  
>novel\_mir\_122 Score: 2.0 R03G\_00640  
Query: 1 TGCATCTGCTGCTGCTGTTG 20  
|||\*\*|||||||||||||||  
Sbjct: 1337 ACGACGACGACGACGACAAC 1318  
>novel\_mir\_122 Score: 1.8 R03G\_00640  
Query: 1 TGCATCTGCTGCTGCTGTTG 20  
\*\*|||||||||||||:|  
Sbjct: 1259 TAGTAGACGACGACGACGAC 1240  
>novel\_mir\_122 Score: 2.0 R03G\_00729  
Query: 1 TGCATCTGCTGCTGCTGTTG 20  
|||\*\*|||||||||||||||  
Sbjct: 959 ACGACGACGACGACGACAAC 940  
>novel\_mir\_122 Score: 2.0 R03G\_01092  
Query: 1 TGCATCTGCTGCTGCTGTTG 20  
|||||||||||\*||\*|||  
Sbjct: 482 ACGTAGACGACAACAACAAC 463  
>novel\_mir\_122 Score: 2.0 R03G\_01361  
Query: 1 TGCATCTGCTGCTGCTGTTG 20  
|||\*\*|||||||||||||||  
Sbjct: 479 ACGACGACGACGACGACAAC 460  
>novel\_mir\_122 Score: 2.5 R03G\_01693  
Query: 1 TGCATCTGCTGCTGCTGTTG 20  
\*|\*||||\*|||||||||||  
Sbjct: 1265 TCATAGACAACGACGACAAC 1246  
>novel\_mir\_122 Score: 2.2 R03G\_01726  
Query: 1 TGCATCTGCTGCTGCTGTTG 20  
|||\*\*|||||||||||||:|  
Sbjct: 380 ACGACGACGACGACGACGAC 361  
>novel\_mir\_122 Score: 2.0 R03G\_01791

Query: 1 TGCATCTGCTGCTGCTGTTG 20  
|||\*\*||||||||||||||  
Sbjct: 189 ACGACGACGACGACGACAAC 170  
>novel\_mir\_122 Score: 2.0 R03G\_01899  
Query: 1 TGCATCTGCTGCTGCTGTTG 20  
|||\*\*||||||||||||||  
Sbjct: 89 ACGACGACGACGACGACAAC 70  
>novel\_mir\_122 Score: 2.0 R03G\_02027  
Query: 1 TGCATCTGCTGCTGCTGTTG 20  
|||\*\*||||||||||||||  
Sbjct: 653 ACGACGACGACGACGACAAC 634  
>novel\_mir\_122 Score: 2.5 R03G\_02180  
Query: 1 TGCATCTGCTGCTGCTGTTG 20  
||\*|:\*||||||||||||||  
Sbjct: 1010 ACATGAACGACGACGACAAC 991  
>novel\_mir\_122 Score: 2.2 R03G\_02192  
Query: 1 TGCATCTGCTGCTGCTGTTG 20  
|||\*\*||||||||||||||:|  
Sbjct: 391 ACGATGACGACGACGACGAC 372  
>novel\_mir\_122 Score: 2.2 R03G\_17350  
Query: 1 TGCATCTGCTGCTGCTGTTG 20  
|||\*\*||||||||||||||:|  
Sbjct: 362 ACGACGACGACGACGACGAC 343  
>novel\_mir\_122 Score: 2.5 R03G\_17108  
Query: 1 TGCATCTGCTGCTGCTGTTG 20  
\*||\*\*||||||||||||||  
Sbjct: 404 TCGACGACGACGACGACAAC 385  
>novel\_mir\_104 Score: 2.0 R03G\_12131  
Query: 1 CAGGGGGGAAAGGGGGGAA 20  
|||:|:|||||||:|||\*||  
Sbjct: 509 GTCTCTCCCTTTCTCCCATT 490  
>novel\_mir\_104 Score: 2.5 R03G\_01691  
Query: 1 CAGGGGGGAAAGGGGGGAA 20  
\*||:|||||||:|:|||\*  
Sbjct: 490 CTCTCCCCCTTTCTCTCCTC 471  
>novel\_mir\_208 Score: 0.5 R03G\_15989  
Query: 1 TCTCCATGTGGTCATCCGCC-AT 22  
||||||||||||||||||\*||  
Sbjct: 1504 AGAGGTACACCAGTAGGCGGTTA 1482  
>novel\_mir\_208 Score: 2.5 R03G\_05552  
Query: 1 TCTCCATGTGGTCATCCGCCAT 22  
\*|||\*|||||:||||||\*|||  
Sbjct: 1171 TGAGTTACACTAGTAGGC-GTA 1151  
>novel\_mir\_141 Score: 0.0 R03G\_16708  
Query: 1 TAGACCGAGGCAAGGTGTTGGC 22

|||||  
Sbjct: 1055 ATCTGGCTCCGTTCCACAACCG 1034  
>novel\_mir\_141 Score: 0.0 R03G\_12669  
Query: 1 TAGACCGAGGCAAGGTGTTGGC 22  
|||||  
Sbjct: 1055 ATCTGGCTCCGTTCCACAACCG 1034  
>novel\_mir\_141 Score: 0.0 R03G\_12961  
Query: 1 TAGACCGAGGCAAGGTGTTGGC 22  
|||||  
Sbjct: 1388 ATCTGGCTCCGTTCCACAACCG 1367  
>novel\_mir\_141 Score: 0.0 R03G\_12964  
Query: 1 TAGACCGAGGCAAGGTGTTGGC 22  
|||||  
Sbjct: 1055 ATCTGGCTCCGTTCCACAACCG 1034  
>novel\_mir\_141 Score: 0.0 R03G\_12075  
Query: 1 TAGACCGAGGCAAGGTGTTGGC 22  
|||||  
Sbjct: 1055 ATCTGGCTCCGTTCCACAACCG 1034  
>novel\_mir\_141 Score: 0.0 R03G\_11952  
Query: 1 TAGACCGAGGCAAGGTGTTGGC 22  
|||||  
Sbjct: 1433 ATCTGGCTCCGTTCCACAACCG 1412  
>novel\_mir\_141 Score: 0.0 R03G\_09927  
Query: 1 TAGACCGAGGCAAGGTGTTGGC 22  
|||||  
Sbjct: 1055 ATCTGGCTCCGTTCCACAACCG 1034  
>novel\_mir\_141 Score: 0.0 R03G\_09951  
Query: 1 TAGACCGAGGCAAGGTGTTGGC 22  
|||||  
Sbjct: 1313 ATCTGGCTCCGTTCCACAACCG 1292  
>novel\_mir\_141 Score: 2.5 R03G\_08411  
Query: 1 TAGACCGAGGCAAGGTGTTGGC 22  
:|||||\*::||\*  
Sbjct: 223 GTCTGGCTCCGTTCCGCAGCCA 202  
>novel\_mir\_141 Score: 0.0 R03G\_05524  
Query: 1 TAGACCGAGGCAAGGTGTTGGC 22  
|||||  
Sbjct: 1055 ATCTGGCTCCGTTCCACAACCG 1034  
>novel\_mir\_141 Score: 0.0 R03G\_05925  
Query: 1 TAGACCGAGGCAAGGTGTTGGC 22  
|||||  
Sbjct: 1055 ATCTGGCTCCGTTCCACAACCG 1034  
>novel\_mir\_141 Score: 0.0 R03G\_05927  
Query: 1 TAGACCGAGGCAAGGTGTTGGC 22  
|||||

Sbjct: 1055 ATCTGGCTCCGTTCCACAACCG 1034  
>novel\_mir\_141 Score: 0.0 R03G\_00684  
Query: 1 TAGACCGAGGCAAGGTGTTGGC 22  
|||||  
Sbjct: 434 ATCTGGCTCCGTTCCACAACCG 413  
>novel\_mir\_160 Score: 1.0 R03G\_16408  
Query: 1 TTTCAAGATCCATTCTATC 19  
||||\*|||||  
Sbjct: 94 AAAGTCCTAGGTAAGATAG 76  
>novel\_mir\_160 Score: 2.5 R03G\_15828  
Query: 1 TTTCAAGATCCATTCTATC 19  
||||||\*||\*||||\*|  
Sbjct: 561 AAAGTTCTATGAAAGAT-G 544  
>novel\_mir\_160 Score: 0.0 R03G\_15259  
Query: 1 TTTCAAGATCCATTCTATC 19  
|||||  
Sbjct: 94 AAAGTTCTAGGTAAGATAG 76  
>novel\_mir\_160 Score: 2.5 R03G\_13849  
Query: 1 TTTCAAGATCCATTCTATC 19  
:||||\*||||\*|  
Sbjct: 478 GAAGTTGTAGGTAAGA-GG 461  
>novel\_mir\_160 Score: 0.0 R03G\_12958  
Query: 1 TTTCAAGATCCATTCTATC 19  
|||||  
Sbjct: 94 AAAGTTCTAGGTAAGATAG 76  
>novel\_mir\_160 Score: 0.0 R03G\_12973  
Query: 1 TTTCAAGATCCATTCTATC 19  
|||||  
Sbjct: 94 AAAGTTCTAGGTAAGATAG 76  
>novel\_mir\_160 Score: 0.0 R03G\_12650  
Query: 1 TTTCAAGATCCATTCTATC 19  
|||||  
Sbjct: 94 AAAGTTCTAGGTAAGATAG 76  
>novel\_mir\_160 Score: 2.5 R03G\_11565  
Query: 1 TTTCAAGATCCATTCTATC 19  
||||||:||||:||\*|\*  
Sbjct: 654 AAAGTTCTGGGTAGGA-AC 637  
>novel\_mir\_160 Score: 0.0 R03G\_11778  
Query: 1 TTTCAAGATCCATTCTATC 19  
|||||  
Sbjct: 94 AAAGTTCTAGGTAAGATAG 76  
>novel\_mir\_160 Score: 2.5 R03G\_10420  
Query: 1 TTTCAAGATCCATTCTATC 19  
:||||\*||||\*|  
Sbjct: 478 GAAGTTGTAGGTAAGA-GG 461

>novel\_mir\_160 Score: 2.5 R03G\_10965  
Query: 1 TTTCAAGATCCATTCTATC 19  
:|||||\*|||||||\*|  
Sbjct: 478 GAAGTTGTAGGTAAGA-GG 461

>novel\_mir\_160 Score: 0.0 R03G\_07982  
Query: 1 TTTCAAGATCCATTCTATC 19  
|||||||  
Sbjct: 94 AAAGTTCTAGGTAAGATAG 76

>novel\_mir\_160 Score: 0.0 R03G\_08650  
Query: 1 TTTCAAGATCCATTCTATC 19  
|||||||  
Sbjct: 94 AAAGTTCTAGGTAAGATAG 76

>novel\_mir\_160 Score: 0.0 R03G\_08655  
Query: 1 TTTCAAGATCCATTCTATC 19  
|||||||  
Sbjct: 94 AAAGTTCTAGGTAAGATAG 76

>novel\_mir\_160 Score: 0.0 R03G\_07035  
Query: 1 TTTCAAGATCCATTCTATC 19  
|||||||  
Sbjct: 94 AAAGTTCTAGGTAAGATAG 76

>novel\_mir\_160 Score: 2.5 R03G\_07923  
Query: 1 TTTCAAGATCCATTCTATC 19  
|||||:|||||:\*|||\*  
Sbjct: 61 AAAGTTTTAGGTAGTATAA 43

>novel\_mir\_160 Score: 2.5 R03G\_05865  
Query: 1 TTTCAAGATCCATTCTATC 19  
:|||||\*|||||||\*|  
Sbjct: 478 GAAGTTGTAGGTAAGA-GG 461

>novel\_mir\_160 Score: 0.0 R03G\_04801  
Query: 1 TTTCAAGATCCATTCTATC 19  
|||||||  
Sbjct: 94 AAAGTTCTAGGTAAGATAG 76

>novel\_mir\_160 Score: 0.0 R03G\_05217  
Query: 1 TTTCAAGATCCATTCTATC 19  
|||||||  
Sbjct: 94 AAAGTTCTAGGTAAGATAG 76

>novel\_mir\_160 Score: 0.0 R03G\_02849  
Query: 1 TTTCAAGATCCATTCTATC 19  
|||||||  
Sbjct: 94 AAAGTTCTAGGTAAGATAG 76

>novel\_mir\_160 Score: 0.0 R03G\_02851  
Query: 1 TTTCAAGATCCATTCTATC 19  
|||||||  
Sbjct: 94 AAAGTTCTAGGTAAGATAG 76

>novel\_mir\_160 Score: 2.0 R03G\_03182

Query: 1 TTTCAAGATCCATTCTATC 19  
|||||\*|||||||\*||  
Sbjct: 676 AAAGTTATAGGTAAGA-AG 659  
>novel\_mir\_160 Score: 0.0 R03G\_00697  
Query: 1 TTTCAAGATCCATTCTATC 19  
|||||||  
Sbjct: 94 AAAGTTCTAGGTAAGATAG 76  
>novel\_mir\_160 Score: 2.5 R03G\_00784  
Query: 1 TTTCAAGATCCATTCTATC 19  
|\*|||||||:|\*||  
Sbjct: 409 ACAGTTCTAGGTAGGACAG 391  
>novel\_mir\_160 Score: 2.5 R03G\_01733  
Query: 1 TTTCAAGATCCATTCTATC 19  
:|||||\*|||||||\*:  
Sbjct: 478 GAAGTTGTAGGTAAGA-GG 461  
>novel\_mir\_160 Score: 2.5 R03G\_01944  
Query: 1 TTTCAAGATCCATTCTATC 19  
:|||||\*|||||||\*:  
Sbjct: 478 GAAGTTGTAGGTAAGA-GG 461  
>novel\_mir\_160 Score: 0.0 R03G\_01965  
Query: 1 TTTCAAGATCCATTCTATC 19  
|||||||  
Sbjct: 94 AAAGTTCTAGGTAAGATAG 76  
>novel\_mir\_160 Score: 2.0 R03G\_02100  
Query: 1 TTTCAAGATCCATTCTATC 19  
|||||||\*|||||\*\*  
Sbjct: 3154 AAAGTTCTAGTTAAGATCA 3136  
>novel\_mir\_160 Score: 2.5 R03G\_17446  
Query: 1 TTTCAAGATCCATTCTATC 19  
:|||||\*|||||||\*:  
Sbjct: 478 GAAGTTGTAGGTAAGA-GG 461  
>novel\_mir\_160 Score: 0.0 R03G\_17425  
Query: 1 TTTCAAGATCCATTCTATC 19  
|||||||  
Sbjct: 94 AAAGTTCTAGGTAAGATAG 76  
>novel\_mir\_160 Score: 2.5 R03G\_17287  
Query: 1 TTTCAAGATCCATTCTATC 19  
:|||||\*|||||||\*:  
Sbjct: 478 GAAGTTGTAGGTAAGA-GG 461  
>novel\_mir\_171 Score: 2.5 R03G\_16763  
Query: 1 TCATTTGGAAAAAAGAGGCG 20  
|\*|||||||\*||\*  
Sbjct: 284 ACTAAACCTTTTTTCTACGG 265  
>novel\_mir\_171 Score: 1.8 R03G\_14401  
Query: 1 TCATTTGGAAAAAAGAGG-CG 20

```

*||:|||||||:~*||
Sbjct: 954 CGTGAACCTTTTTCTCTGGC 934
>novel_mir_171 Score: 2.5 R03G_14401
Query: 1 TCATTTGGAAAAAAGAGGCG 20
||*||:|||||||:~:~|:
Sbjct: 192 AGGAAATCTTTTTCTTTGT 173
>novel_mir_171 Score: 2.2 R03G_13484
Query: 1 TCATTTGGAAAAAAGAGGC-G 20
*|||||||*|||||:~*|
Sbjct: 276 CGTAAACCTTCTCTCTGAC 256
>novel_mir_171 Score: 1.0 R03G_10788
Query: 1 TCATTTGGAAAAAAGAGGCG 20
|||||||*|||||||
Sbjct: 68 AGTAAACCTTTTTCTCCGC 49
>novel_mir_171 Score: 0.0 R03G_04023
Query: 1 TCATTTGGAAAAAAGAGGCG 20
|||||||
Sbjct: 929 AGTAAACCTTTTTCTCCGC 910
>novel_mir_171 Score: 2.2 R03G_04030
Query: 1 TCATTTGGAAAAAAGAGGC-G 20
*|||||||*|||||:~*|
Sbjct: 276 CGTAAACCTTCTCTCTGAC 256
>novel_mir_171 Score: 1.0 R03G_01741
Query: 1 TCATTTGGAAAAAAGAGGCG 20
|||||||*|||||||
Sbjct: 1421 AGTAAACCTTTTTCTCCGC 1402
>novel_mir_199 Score: 2.5 R03G_15536
Query: 1 TATTGGTGCGCATGTTTCGATG 22
|*|||||:||||||*||*|
Sbjct: 3663 AGAACACGTGTACAAA-CTCC 3643
>novel_mir_199 Score: 0.5 R03G_04428
Query: 1 TATTGGTGCGCATGTTTCGATG 22
|||||:|||||||
Sbjct: 1093 ATAACCATGCGTACAAAGCTAC 1072
>novel_mir_155 Score: 2.5 R03G_16896
Query: 1 TCAAGGCCAGACATCTATCGAA 23
|||||||*~*~*~*~*
Sbjct: 1290 AGTTCCCGGTCTGTAAA-ATCTG 1269
>novel_mir_155 Score: 2.5 R03G_12002
Query: 1 TCAAGGCCAGACATCTATCGAA 23
|||||||*~*~*~*~*
Sbjct: 1290 AGTTCCCGGTCTGTAAA-ATCTG 1269
>novel_mir_155 Score: 2.5 R03G_00645
Query: 1 TCAAGGCCAGACATCTATCGAA 23
|||||||*~*~*~*~*

```



Sbjct: 1116 AGTTCCCGGTCTGTAAA-ATCTG 1095  
>novel\_mir\_152 Score: 0.0 R03G\_16382  
Query: 1 TGAGGAAGTCTAAGGCTGCA 20  
|||||

Sbjct: 935 ACTCCTTCAGATTCCGACGT 916  
>novel\_mir\_152 Score: 0.2 R03G\_12457  
Query: 1 TGAGGAAGTCTAAGGCTGCA 20  
|||||:|

Sbjct: 803 ACTCCTTCAGATTCCGATGT 784  
>novel\_mir\_152 Score: 0.5 R03G\_09250  
Query: 1 TGAGGAAGTCTAAGGCTGCA 20  
|||||\*|

Sbjct: 866 ACTCCTTCAGATTCCGACAT 847  
>novel\_mir\_152 Score: 1.0 R03G\_07205  
Query: 1 TGAGGAAGTCTAAGGCTGCA 20  
|||||\*|||||

Sbjct: 662 ACTCCTTCAGAATCCGACGT 643  
>novel\_mir\_152 Score: 0.0 R03G\_02484  
Query: 1 TGAGGAAGTCTAAGGCTGCA 20  
|||||

Sbjct: 551 ACTCCTTCAGATTCCGACGT 532  
>novel\_mir\_152 Score: 1.0 R03G\_03724  
Query: 1 TGAGGAAGTCTAAGGCTGCA 20  
|||||\*|||

Sbjct: 584 ACTCCTTCAGATTCCGTCGT 565  
>novel\_mir\_152 Score: 0.0 R03G\_01430  
Query: 1 TGAGGAAGTCTAAGGCTGCA 20  
|||||

Sbjct: 701 ACTCCTTCAGATTCCGACGT 682  
>novel\_mir\_166 Score: 0.0 R03G\_11766  
Query: 1 TTCCAAAGTTTCTTCTTGATCAG 23  
|||||

Sbjct: 999 AAGGTTTCAAAGAAGAACTAGTC 977  
>novel\_mir\_166 Score: 2.5 R03G\_05697  
Query: 1 TTCCAAAGTTTCTTCTTGATCAG 23  
|||\*|||:|:|||||\*|||

Sbjct: 57 AAGTTTTCGAGGAAGAACTCGTC 35  
>novel\_mir\_166 Score: 0.0 R03G\_02843  
Query: 1 TTCCAAAGTTTCTTCTTGATCAG 23  
|||||

Sbjct: 705 AAGGTTTCAAAGAAGAACTAGTC 683  
>novel\_mir\_166 Score: 2.0 R03G\_01494  
Query: 1 TTCCAAAGTTTCTTCTTG-ATCAG 23  
:|||||:|:|\*||\*||

Sbjct: 457 GAGGTTTCAAAGAAGGATGTAATC 434

>novel\_mir\_140 Score: 2.0 R03G\_17266  
Query: 1 TATGCTTGCTAAATTCACGATG 22  
|||||||\*|||\*|||||  
Sbjct: 123 ATACGAACGACTTAAATGCTAC 102

>novel\_mir\_140 Score: 2.0 R03G\_17237  
Query: 1 TATGCTTGCTAAATTCACGATG 22  
|||||||\*|||\*|||||  
Sbjct: 123 ATACGAACGATCTAAATGCTAC 102

>novel\_mir\_140 Score: 1.0 R03G\_17208  
Query: 1 TATGCTTGCTAAATTCACGATG 22  
|||||||\*|||||  
Sbjct: 273 ATACGAACGATTTAAATGCTAC 252

>novel\_mir\_140 Score: 0.0 R03G\_16894  
Query: 1 TATGCTTGCTAAATTCACGATG 22  
|||||||\*|||||  
Sbjct: 120 ATACGAACGATTTAAGTGCTAC 99

>novel\_mir\_140 Score: 1.0 R03G\_16695  
Query: 1 TATGCTTGCTAAATTCACGATG 22  
|||||||\*|||||  
Sbjct: 51 ATACGAACGATTTAAATGCTAC 30

>novel\_mir\_140 Score: 2.0 R03G\_16701  
Query: 1 TATGCTTGCTAAATTCACGATG 22  
|||||||\*||\*|||||  
Sbjct: 315 ATACGAACGATTCAAATGCTAC 294

>novel\_mir\_140 Score: 2.0 R03G\_14973  
Query: 1 TATGCTTGCTAAATTCACGATG 22  
|||||||\*|||\*|||||  
Sbjct: 123 ATACGAACGATCTAAATGCTAC 102

>novel\_mir\_140 Score: 2.0 R03G\_14985  
Query: 1 TATGCTTGCTAAATTCACGATG 22  
|||||||\*|||\*|||||  
Sbjct: 123 ATACGAACGATCTAAATGCTAC 102

>novel\_mir\_140 Score: 0.0 R03G\_14993  
Query: 1 TATGCTTGCTAAATTCACGATG 22  
|||||||\*|||||  
Sbjct: 123 ATACGAACGATTTAAGTGCTAC 102

>novel\_mir\_140 Score: 2.0 R03G\_14999  
Query: 1 TATGCTTGCTAAATTCACGATG 22  
|||||||\*|||\*|||||  
Sbjct: 123 ATACGAACGATCTAAATGCTAC 102

>novel\_mir\_140 Score: 2.0 R03G\_15156  
Query: 1 TATGCTTGCTAAATTCACGATG 22  
|||||||\*|||\*|||||  
Sbjct: 123 ATACGAACGATCTAAATGCTAC 102

>novel\_mir\_140 Score: 2.0 R03G\_14360

Query: 1 TATGCTTGCTAAATTCACGATG 22  
|||||||\*|||\*|||||  
Sbjct: 123 ATACGAACGATCTAAATGCTAC 102  
>novel\_mir\_140 Score: 1.5 R03G\_13715  
Query: 1 TATGCTTGCTAAATTCACGATG 22  
|||||||\*:|||||  
Sbjct: 51 ATACGAACGATTCGAGTGCTAC 30  
>novel\_mir\_140 Score: 1.5 R03G\_13731  
Query: 1 TATGCTTGCTAAATTCACGATG 22  
|||||||\*:|||||  
Sbjct: 336 ATACGAACGATTCGAGTGCTAC 315  
>novel\_mir\_140 Score: 1.0 R03G\_11277  
Query: 1 TATGCTTGCTAAATTCACGATG 22  
|||||||\*|||  
Sbjct: 123 ATACGAACGATTTAAATGCTAC 102  
>novel\_mir\_140 Score: 1.0 R03G\_09543  
Query: 1 TATGCTTGCTAAATTCACGATG 22  
|||||||\*|||  
Sbjct: 180 ATACGAACGATTTAAATGCTAC 159  
>novel\_mir\_140 Score: 1.0 R03G\_09611  
Query: 1 TATGCTTGCTAAATTCACGATG 22  
|||||||\*|||  
Sbjct: 72 ATACGAACGATTTAAATGCTAC 51  
>novel\_mir\_140 Score: 2.0 R03G\_10037  
Query: 1 TATGCTTGCTAAATTCACGATG 22  
|||||||\*|||\*|||  
Sbjct: 264 ATACGAACGATCTAAATGCTAC 243  
>novel\_mir\_140 Score: 1.0 R03G\_08840  
Query: 1 TATGCTTGCTAAATTCACGATG 22  
|||||||\*|||  
Sbjct: 279 ATACGAACGATTTAAATGCTAC 258  
>novel\_mir\_140 Score: 2.0 R03G\_06738  
Query: 1 TATGCTTGCTAAATTCACGATG 22  
|||||||\*|||\*|||  
Sbjct: 123 ATACGAACGATCTAAATGCTAC 102  
>novel\_mir\_140 Score: 1.0 R03G\_07025  
Query: 1 TATGCTTGCTAAATTCACGATG 22  
|||||||\*|||  
Sbjct: 72 ATACGAACGATTTAAATGCTAC 51  
>novel\_mir\_140 Score: 2.0 R03G\_07680  
Query: 1 TATGCTTGCTAAATTCACGATG 22  
|||||||\*|||\*|||  
Sbjct: 123 ATACGAACGATCTAAATGCTAC 102  
>novel\_mir\_140 Score: 2.0 R03G\_07703  
Query: 1 TATGCTTGCTAAATTCACGATG 22

|||||\*||\*|||||  
Sbjct: 279 ATACGAACGATTCAAATGCTAC 258  
>novel\_mir\_140 Score: 0.0 R03G\_07857  
Query: 1 TATGCTTGCTAAATTCACGATG 22  
|||||\*||\*|||||  
Sbjct: 279 ATACGAACGATTTAAGTGCTAC 258  
>novel\_mir\_140 Score: 1.0 R03G\_05633  
Query: 1 TATGCTTGCTAAATTCACGATG 22  
|||||\*||\*|||||  
Sbjct: 72 ATACGAACGATTTAAATGCTAC 51  
>novel\_mir\_140 Score: 0.0 R03G\_06443  
Query: 1 TATGCTTGCTAAATTCACGATG 22  
|||||\*||\*|||||  
Sbjct: 123 ATACGAACGATTTAAGTGCTAC 102  
>novel\_mir\_140 Score: 2.0 R03G\_04687  
Query: 1 TATGCTTGCTAAATTCACGATG 22  
|||||\*||\*|||||  
Sbjct: 123 ATACGAACGATCTAAATGCTAC 102  
>novel\_mir\_140 Score: 2.0 R03G\_05518  
Query: 1 TATGCTTGCTAAATTCACGATG 22  
||\*|||||\*||\*|||||  
Sbjct: 42 ATTCGAACGATTTAAATGCTAC 21  
>novel\_mir\_140 Score: 2.5 R03G\_02610  
Query: 1 TATGCTTGCTAAATTCACGATG 22  
|||||:|||||\*||\*|  
Sbjct: 994 ATACGAATAATTTAAGT-CTTC 974  
>novel\_mir\_140 Score: 2.5 R03G\_02614  
Query: 1 TATGCTTGCTAAATTCACGATG 22  
|||||:|||||\*||\*|  
Sbjct: 115 ATACGAATAATTTAAGT-CTTC 95  
>novel\_mir\_140 Score: 0.0 R03G\_03581  
Query: 1 TATGCTTGCTAAATTCACGATG 22  
|||||\*||\*|||||  
Sbjct: 123 ATACGAACGATTTAAGTGCTAC 102  
>novel\_mir\_140 Score: 0.0 R03G\_03789  
Query: 1 TATGCTTGCTAAATTCACGATG 22  
|||||\*||\*|||||  
Sbjct: 123 ATACGAACGATTTAAGTGCTAC 102  
>novel\_mir\_140 Score: 2.0 R03G\_03807  
Query: 1 TATGCTTGCTAAATTCACGATG 22  
|||||\*||\*|||||  
Sbjct: 51 ATACGAACGACTTAAATGCTAC 30  
>novel\_mir\_140 Score: 2.0 R03G\_03809  
Query: 1 TATGCTTGCTAAATTCACGATG 22  
|||||\*||\*|||||

Sbjct: 51 ATACGAACGACTTAAATGCTAC 30  
 >novel\_mir\_140 Score: 0.0 R03G\_00253  
 Query: 1 TATGCTTGCTAAATTCACGATG 22  
 |||

Sbjct: 123 ATACGAACGATTTAAGTGCTAC 102  
 >novel\_mir\_140 Score: 1.0 R03G\_00297  
 Query: 1 TATGCTTGCTAAATTCACGATG 22  
 |||

Sbjct: 123 ATACGAACGATTTAAATGCTAC 102  
 >novel\_mir\_140 Score: 2.0 R03G\_01202  
 Query: 1 TATGCTTGCTAAATTCACGATG 22  
 |||\*|||

Sbjct: 123 ATACGAACGATCTAAATGCTAC 102  
 >novel\_mir\_140 Score: 2.0 R03G\_17349  
 Query: 1 TATGCTTGCTAAATTCACGATG 22  
 |||\*|||\*|||

Sbjct: 120 ATACGAACGACTTAAATGCTAC 99  
 >novel\_mir\_140 Score: 0.0 R03G\_17304  
 Query: 1 TATGCTTGCTAAATTCACGATG 22  
 |||

Sbjct: 123 ATACGAACGATTTAAGTGCTAC 102  
 >novel\_mir\_140 Score: 2.0 R03G\_17153  
 Query: 1 TATGCTTGCTAAATTCACGATG 22  
 |||\*|||\*|||

Sbjct: 123 ATACGAACGACTTAAATGCTAC 102  
 >novel\_mir\_192 Score: 2.2 R03G\_05381  
 Query: 1 TAGTGTATTGCTTGAGGTTAT-TC 23  
 :|||:|:|\*||\*||

Sbjct: 1158 GTACCATAGTGAACCTCCTATAGAG 1135  
 >novel\_mir\_168 Score: 1.0 R03G\_17048  
 Query: 1 TAGTGACCTTTCATGTGCGG 20  
 |||:|:|:|:|:|

Sbjct: 47 ATCATTGGAAAGTATACGCC 28  
 >novel\_mir\_168 Score: 1.5 R03G\_16382  
 Query: 1 TAGTGACCTTTCATGTGCGG 20  
 ||:|:|:|:|:|\*|||

Sbjct: 1073 ATTACTGGAAAGTACAAGCC 1054  
 >novel\_mir\_168 Score: 0.5 R03G\_16443  
 Query: 1 TAGTGACCTTTCATGTGCGG 20  
 ||:|:|:|:|:|:|

Sbjct: 41 ATTACTGGAAAGTACACGCC 22  
 >novel\_mir\_168 Score: 1.0 R03G\_15794  
 Query: 1 TAGTGACCTTTCATGTGCGG 20  
 |||:|:|:|:|:|\*||

Sbjct: 260 ATCACTGGAAAGTATACACC 241

>novel\_mir\_168 Score: 1.2 R03G\_15207  
Query: 1 TAGTGACCTTTCATGTGCGG 20  
|||||||:|\*:  
Sbjct: 260 ATCACTGGAAAGTATACATC 241  
>novel\_mir\_168 Score: 0.0 R03G\_12457  
Query: 1 TAGTGACCTTTCATGTGCGG 20  
|||||||  
Sbjct: 941 ATCACTGGAAAGTACACGCC 922  
>novel\_mir\_168 Score: 2.5 R03G\_11199  
Query: 1 TAGTGACCTTTCATGTGCGG 20  
|||:\*|||:|\*||  
Sbjct: 923 ATCATCGGAAAGTATACACC 904  
>novel\_mir\_168 Score: 2.0 R03G\_11364  
Query: 1 TAGTGACCTTTCATGTGCGG 20  
||||\*|||:|\*||  
Sbjct: 917 ATCACCGGAAAGTATACACC 898  
>novel\_mir\_168 Score: 1.8 R03G\_09250  
Query: 1 TAGTGACCTTTCATGTGCGG 20  
||:|\*|||:|  
Sbjct: 1004 ATTACCGGAAAGTACACGTC 985  
>novel\_mir\_168 Score: 0.0 R03G\_08570  
Query: 1 TAGTGACCTTTCATGTGCGG 20  
|||||||  
Sbjct: 32 ATCACTGGAAAGTACACGCC 13  
>novel\_mir\_168 Score: 1.8 R03G\_08647  
Query: 1 TAGTGACCTTTCATGTGCGG 20  
||:|||||:|\*:  
Sbjct: 482 ATTACTGGAAAGTATACTCT 463  
>novel\_mir\_168 Score: 2.5 R03G\_08679  
Query: 1 TAGTGACCTTTCATGTGCGG 20  
||:|||||\*|||:|:  
Sbjct: 750 ATTACTGGAAAGAACATGTT 731  
>novel\_mir\_168 Score: 2.0 R03G\_02484  
Query: 1 TAGTGACCTTTCATGTGCGG 20  
||:||\*|||\*||  
Sbjct: 689 ATTACTAGAAAGTACACACC 670  
>novel\_mir\_168 Score: 1.8 R03G\_03146  
Query: 1 TAGTGACCTTTCATGTGCGG 20  
||:||\*|||:|  
Sbjct: 620 ATTACAGGAAAGTACACGTC 601  
>novel\_mir\_168 Score: 0.5 R03G\_03724  
Query: 1 TAGTGACCTTTCATGTGCGG 20  
|||||||\*||  
Sbjct: 722 ATCACTGGAAAGTACACACC 703  
>novel\_mir\_168 Score: 0.5 R03G\_01430

Query: 1 TAGTGACCTTTCATGTGCGG 20  
\*|||||  
Sbjct: 839 TTCACTGGAAAGTACACGCC 820  
>novel\_mir\_168 Score: 2.0 R03G\_01465  
Query: 1 TAGTGACCTTTCATGTGCGG 20  
||||\*|||:|\*||  
Sbjct: 260 ATCACCGGAAAGTATACACC 241  
>novel\_mir\_168 Score: 2.0 R03G\_01842  
Query: 1 TAGTGACCTTTCATGTGCGG 20  
||||\*|||:|\*||  
Sbjct: 695 ATCACCGGAAAGTATACACC 676  
>novel\_mir\_151 Score: 2.0 R03G\_16728  
Query: 1 ATGCCGTCAAACACTGGTCGCATG 23  
\*\*|||||\*  
Sbjct: 22 ACCGGCAGTTTGTACCAGCGTA- 1  
>novel\_mir\_151 Score: 2.0 R03G\_15883  
Query: 1 ATGCCGTCAAACACTGGTCGCATG 23  
\*\*|||||\*  
Sbjct: 22 ACCGGCAGTTTGTACCAGCGTA- 1  
>novel\_mir\_151 Score: 2.0 R03G\_07988  
Query: 1 ATGCCGTCAAACACTGGTCGCATG 23  
\*\*|||||\*  
Sbjct: 22 ACCGGCAGTTTGTACCAGCGTA- 1  
>novel\_mir\_151 Score: 2.0 R03G\_01304  
Query: 1 ATGCCGTCAAACACTGGTCGCATG 23  
\*\*|||||\*  
Sbjct: 22 ACCGGCAGTTTGTACCAGCGTA- 1  
>novel\_mir\_144 Score: 2.5 R03G\_13221  
Query: 1 TTACGGTCAACAGTGCATAAG 22  
\*:\*:|:|||||  
Sbjct: 1448 CGAGCTAGTTGTACAGTATTC 1427  
>novel\_mir\_144 Score: 2.5 R03G\_13224  
Query: 1 TTACGGTCAACAGTGCATAAG 22  
\*:\*:|:|||||  
Sbjct: 1448 CGAGCTAGTTGTACAGTATTC 1427  
>novel\_mir\_144 Score: 0.0 R03G\_12520  
Query: 1 TTACGGTCAACAGTGCATAAG 22  
|||||  
Sbjct: 1166 AATGCCAGTTGTACAGTATTC 1145  
>novel\_mir\_144 Score: 2.5 R03G\_04583  
Query: 1 TTACGGTCAACAGTGCATAAG 22  
|:|:|||||\*|||||\*|  
Sbjct: 539 AGTGTGACAGTTGACACAGTATAC 518  
>novel\_mir\_144 Score: 2.5 R03G\_04120  
Query: 1 TTACGGTCAACAGTGCATAAG 22

\*:\*||:||||||||||||||  
Sbjct: 1448 CGAGCTAGTTGTCACAGTATTC 1427  
>novel\_mir\_144 Score: 2.5 R03G\_04123  
Query: 1 TTACGGTCAACAGTGCATAAG 22  
\*:\*||:||||||||||||||  
Sbjct: 1448 CGAGCTAGTTGTCACAGTATTC 1427  
>novel\_mir\_144 Score: 2.5 R03G\_04203  
Query: 1 TTACGGTCAACAGTGCATAAG 22  
\*:\*||:||||||||||||||  
Sbjct: 392 CGAGCTAGTTGTCACAGTATTC 371  
>novel\_mir\_144 Score: 0.0 R03G\_00797  
Query: 1 TTACGGTCAACAGTGCATAAG 22  
||||||||||||||||  
Sbjct: 1166 AATGCCAGTTGTCACAGTATTC 1145  
>novel\_mir\_144 Score: 2.5 R03G\_17094  
Query: 1 TTACGGTCAACAGTGCATAAG 22  
\*:\*||:||||||||||||||  
Sbjct: 107 CGAGCTAGTTGTCACAGTATTC 86  
>novel\_mir\_175 Score: 2.5 R03G\_06036  
Query: 1 TAATAGAAGACTGTAGGAGA 20  
||||||\*||||\*||\*||  
Sbjct: 2175 ATTATCTCCTGACTTCC-CT 2157  
>novel\_mir\_153 Score: 2.5 R03G\_16855  
Query: 1 TGTTGCGTTTCACTTTACTTTTG 23  
||||\*||||\*||||||:|:  
Sbjct: 1156 ACAAGGCAAATTGAAATGAGAAT 1134  
>novel\_mir\_153 Score: 2.5 R03G\_16780  
Query: 1 TGTTGCGTTTCACTTTACTTTTG 23  
||||\*||||\*||||||:|:  
Sbjct: 1156 ACAAGGCAAATTGAAATGAGAAT 1134  
>novel\_mir\_153 Score: 2.5 R03G\_16782  
Query: 1 TGTTGCGTTTCACTTTACTTTTG 23  
||||\*||||\*||||||:|:  
Sbjct: 1156 ACAAGGCAAATTGAAATGAGAAT 1134  
>novel\_mir\_153 Score: 2.0 R03G\_16443  
Query: 1 TGTTGCGTTTCACTTTACTTTTG 23  
|:||||:||||||\*||||  
Sbjct: 199 ATAACGCGAAGTGAAACGAAAAC 177  
>novel\_mir\_153 Score: 2.2 R03G\_12985  
Query: 1 TGTTGCGTTTCACTTTACTTTTG 23  
|:||\*||:||||||:|  
Sbjct: 1153 ATAAAGCGAAGTGAAATGAGAAC 1131  
>novel\_mir\_153 Score: 2.2 R03G\_12986  
Query: 1 TGTTGCGTTTCACTTTACTTTTG 23  
|:||\*||:||||||:|



Sbjct: 1153 ATAAAGCGAAGTGAAATGAGAAC 1131  
>novel\_mir\_153 Score: 2.2 R03G\_12228  
Query: 1 TGTTGCGTTTCACTTTACTTTTG 23  
|:|\*||:|||||||:|

Sbjct: 1153 ATAAAGCGAAGTGAAATGAGAAC 1131  
>novel\_mir\_153 Score: 2.2 R03G\_12229  
Query: 1 TGTTGCGTTTCACTTTACTTTTG 23  
|:|\*||:|||||||:|

Sbjct: 1153 ATAAAGCGAAGTGAAATGAGAAC 1131  
>novel\_mir\_153 Score: 0.0 R03G\_12457  
Query: 1 TGTTGCGTTTCACTTTACTTTTG 23  
|||||||

Sbjct: 1099 ACAACGCAAAGTGAAATGAAAAC 1077  
>novel\_mir\_153 Score: 0.5 R03G\_09250  
Query: 1 TGTTGCGTTTCACTTTACTTTTG 23  
|||:|||||||

Sbjct: 1162 ACAATGCAAAGTGAAATGAAAAC 1140  
>novel\_mir\_153 Score: 2.2 R03G\_06313  
Query: 1 TGTTGCGTTTCACTTTACTTTTG 23  
||||\*|||||||\*|||:

Sbjct: 826 ACAACACAAAGTGAAATAATAAT 804  
>novel\_mir\_153 Score: 0.0 R03G\_02484  
Query: 1 TGTTGCGTTTCACTTTACTTTTG 23  
|||||||

Sbjct: 847 ACAACGCAAAGTGAAATGAAAAC 825  
>novel\_mir\_153 Score: 1.0 R03G\_03724  
Query: 1 TGTTGCGTTTCACTTTACTTTTG 23  
|||\*|||||||

Sbjct: 880 ACACCGCAAAGTGAAATGAAAAC 858  
>novel\_mir\_153 Score: 2.0 R03G\_01430  
Query: 1 TGTTGCGTTTCACTTTACTTTTG 23  
|:||||:||||||\*|||

Sbjct: 997 ATAACGCGAAGTGAAACGAAAAC 975  
>novel\_mir\_159 Score: 2.5 R03G\_16919  
Query: 1 TTAAACGGTTTGTGGCAGAGAC 22  
|||\*||:|||||||

Sbjct: 40 AATGTTCTAAACACCGTCTCTG 19  
>novel\_mir\_159 Score: 2.0 R03G\_12000  
Query: 1 TTAAACGGTTTGTGGCAGAGAC 22  
|||||||\*||:||||\*||

Sbjct: 70 AATTTGCCAATCATCGTCT-TG 50  
>novel\_mir\_159 Score: 2.5 R03G\_12546  
Query: 1 TTAAACGGTTTGTGGCAGAGAC 22  
|||\*||:|||||||

Sbjct: 40 AATGTTCTAAACACCGTCTCTG 19

>novel\_mir\_159 Score: 2.5 R03G\_10530  
Query: 1 TTAAACGGTTTGTGGCAGAGAC 22  
|||\*|\*|:||||||||||||||  
Sbjct: 40 AATGTTCTAAACACCGTCTCTG 19  
>novel\_mir\_159 Score: 2.5 R03G\_06436  
Query: 1 TTAAACGGTTTGTGGCAGAGAC 22  
|||\*|\*|:||||||||||||||  
Sbjct: 40 AATGTTCTAAACACCGTCTCTG 19  
>novel\_mir\_159 Score: 2.5 R03G\_03577  
Query: 1 TTAAACGGTTTGTGGCAGAGAC 22  
|||\*|\*|:||||||||||||||  
Sbjct: 40 AATGTTCTAAACACCGTCTCTG 19  
>novel\_mir\_159 Score: 2.5 R03G\_17432  
Query: 1 TTAAACGGTTTGTGGCAGAGAC 22  
|||\*|\*|:||||||||||||||  
Sbjct: 40 AATGTTCTAAACACCGTCTCTG 19  
>novel\_mir\_193 Score: 2.5 R03G\_16404  
Query: 1 TGTATGATTTGAAGTCAAGT 20  
||||:||||||||||\*|\*|  
Sbjct: 2842 ACATGTTAAACTTCAGGT-A 2824  
>novel\_mir\_193 Score: 0.5 R03G\_16429  
Query: 1 TGTATGATTTGAAGTCAAGT 20  
||||:||||||||||||||  
Sbjct: 97 ACATGCTAAACTTCAGTTCA 78  
>novel\_mir\_193 Score: 1.5 R03G\_15745  
Query: 1 TGTATGATTTGAAGTCAAGT 20  
|||||||||:||||||\*|||  
Sbjct: 82 ACATACTAAGCTTCAGCTCA 63  
>novel\_mir\_193 Score: 0.5 R03G\_15496  
Query: 1 TGTATGATTTGAAGTCAAGT 20  
||||:||||||||||||||  
Sbjct: 28 ACATGCTAAACTTCAGTTCA 9  
>novel\_mir\_193 Score: 0.5 R03G\_14806  
Query: 1 TGTATGATTTGAAGTCAAGT 20  
||||:||||||||||||||  
Sbjct: 292 ACATGCTAAACTTCAGTTCA 273  
>novel\_mir\_193 Score: 1.8 R03G\_14365  
Query: 1 TGTATGATTTGAAGTCAAGT 20  
||||:||||||\*||||||:|  
Sbjct: 277 ACATGCTAAACCTCAGTTTA 258  
>novel\_mir\_193 Score: 2.2 R03G\_14433  
Query: 1 TGTATGATTTGAAGTCAAGT 20  
||||||||\*|:|||||||:\*  
Sbjct: 888 ACATACTACATTTTCAGTTTT 869  
>novel\_mir\_193 Score: 0.5 R03G\_14467

Query: 1 TGTATGATTTGAAGTCAAGT 20  
||||:|||||||  
Sbjct: 82 ACATGCTAAACTTCAGTTCA 63  
>novel\_mir\_193 Score: 0.5 R03G\_14722  
Query: 1 TGTATGATTTGAAGTCAAGT 20  
||||:|||||||  
Sbjct: 385 ACATGCTAAACTTCAGTTCA 366  
>novel\_mir\_193 Score: 0.5 R03G\_13903  
Query: 1 TGTATGATTTGAAGTCAAGT 20  
||||:|||||||  
Sbjct: 385 ACATGCTAAACTTCAGTTCA 366  
>novel\_mir\_193 Score: 1.5 R03G\_14123  
Query: 1 TGTATGATTTGAAGTCAAGT 20  
||||:|||||||\*|||||  
Sbjct: 75 ACATGCTAAACTTCCGTTCA 56  
>novel\_mir\_193 Score: 1.5 R03G\_13574  
Query: 1 TGTATGATTTGAAGTCAAGT 20  
|||||||:||||\*|||||||  
Sbjct: 163 ACATACTGAACTCCAGTTCA 144  
>novel\_mir\_193 Score: 1.5 R03G\_13582  
Query: 1 TGTATGATTTGAAGTCAAGT 20  
|||||||:||||\*|||||||  
Sbjct: 189 ACATACTGAACTCCAGTTCA 170  
>novel\_mir\_193 Score: 0.5 R03G\_13664  
Query: 1 TGTATGATTTGAAGTCAAGT 20  
||||:|||||||  
Sbjct: 385 ACATGCTAAACTTCAGTTCA 366  
>novel\_mir\_193 Score: 0.5 R03G\_13672  
Query: 1 TGTATGATTTGAAGTCAAGT 20  
||||:|||||||  
Sbjct: 385 ACATGCTAAACTTCAGTTCA 366  
>novel\_mir\_193 Score: 0.5 R03G\_13799  
Query: 1 TGTATGATTTGAAGTCAAGT 20  
||||:|||||||  
Sbjct: 82 ACATGCTAAACTTCAGTTCA 63  
>novel\_mir\_193 Score: 2.5 R03G\_12639  
Query: 1 TGTATGATTTGAAGTCAAGT 20  
||||||\*||||||\*|||\*|  
Sbjct: 312 ACATACGAAACTTCCGTTAA 293  
>novel\_mir\_193 Score: 0.5 R03G\_11486  
Query: 1 TGTATGATTTGAAGTCAAGT 20  
||||:|||||||  
Sbjct: 157 ACATGCTAAACTTCAGTTCA 138  
>novel\_mir\_193 Score: 1.0 R03G\_11567  
Query: 1 TGTATGATTTGAAGTCAAGT 20

|:|:|||||||||||||  
Sbjct: 1237 ATATGCTAAACTTCAGTTCA 1218  
>novel\_mir\_193 Score: 2.0 R03G\_09279  
Query: 1 TGTATGATTTGAAGTCAAGT 20  
||||:|||||||||\*||\*||  
Sbjct: 151 ACATGCTAAACTTCCGTGCA 132  
>novel\_mir\_193 Score: 0.5 R03G\_09419  
Query: 1 TGTATGATTTGAAGTCAAGT 20  
||||:|||||||||||||  
Sbjct: 205 ACATGCTAAACTTCAGTTCA 186  
>novel\_mir\_193 Score: 1.5 R03G\_09656  
Query: 1 TGTATGATTTGAAGTCAAGT 20  
||||:|||||||||\*|||||  
Sbjct: 82 ACATGCTAAACTTCCGTTCA 63  
>novel\_mir\_193 Score: 1.5 R03G\_09821  
Query: 1 TGTATGATTTGAAGTCAAGT 20  
||||:|\*|||||||||||||  
Sbjct: 82 ACATGCCAAACTTCAGTTCA 63  
>novel\_mir\_193 Score: 0.5 R03G\_09838  
Query: 1 TGTATGATTTGAAGTCAAGT 20  
||||:|||||||||||||  
Sbjct: 157 ACATGCTAAACTTCAGTTCA 138  
>novel\_mir\_193 Score: 1.0 R03G\_10000  
Query: 1 TGTATGATTTGAAGTCAAGT 20  
||||:||||:|||||||||  
Sbjct: 82 ACATGCTAAGCTTCAGTTCA 63  
>novel\_mir\_193 Score: 0.5 R03G\_08301  
Query: 1 TGTATGATTTGAAGTCAAGT 20  
||||:|||||||||||||  
Sbjct: 310 ACATGCTAAACTTCAGTTCA 291  
>novel\_mir\_193 Score: 1.5 R03G\_08649  
Query: 1 TGTATGATTTGAAGTCAAGT 20  
||||:|||||||||\*|||  
Sbjct: 112 ACATGCTAAACTTCAGCTCA 93  
>novel\_mir\_193 Score: 0.5 R03G\_08906  
Query: 1 TGTATGATTTGAAGTCAAGT 20  
||||:|||||||||||||  
Sbjct: 385 ACATGCTAAACTTCAGTTCA 366  
>novel\_mir\_193 Score: 1.5 R03G\_07273  
Query: 1 TGTATGATTTGAAGTCAAGT 20  
||||:|||||||||\*|||||  
Sbjct: 82 ACATGCTAAACTTCCGTTCA 63  
>novel\_mir\_193 Score: 1.5 R03G\_07438  
Query: 1 TGTATGATTTGAAGTCAAGT 20  
||||:|||||||||\*|||||

Sbjct: 82 ACATGCTAAACTTCCGTTCA 63  
>novel\_mir\_193 Score: 0.0 R03G\_07580  
Query: 1 TGTATGATTTGAAGTCAAGT 20  
|||||

Sbjct: 109 ACATACTAAACTTCAGTTCA 90  
>novel\_mir\_193 Score: 0.5 R03G\_07788  
Query: 1 TGTATGATTTGAAGTCAAGT 20  
||||:|||||

Sbjct: 334 ACATGCTAAACTTCAGTTCA 315  
>novel\_mir\_193 Score: 2.5 R03G\_06342  
Query: 1 TGTATGATTTGAAGTCAAGT 20  
::|||:|:|:|||||:|

Sbjct: 237 GTATATTAGATTTTCAGTTTA 218  
>novel\_mir\_193 Score: 0.5 R03G\_05133  
Query: 1 TGTATGATTTGAAGTCAAGT 20  
|||||:|||||

Sbjct: 334 ACATACTAAACTTTAGTTCA 315  
>novel\_mir\_193 Score: 0.5 R03G\_05181  
Query: 1 TGTATGATTTGAAGTCAAGT 20  
||||:|||||

Sbjct: 385 ACATGCTAAACTTCAGTTCA 366  
>novel\_mir\_193 Score: 0.5 R03G\_05194  
Query: 1 TGTATGATTTGAAGTCAAGT 20  
||||:|||||

Sbjct: 385 ACATGCTAAACTTCAGTTCA 366  
>novel\_mir\_193 Score: 0.5 R03G\_05303  
Query: 1 TGTATGATTTGAAGTCAAGT 20  
||||:|||||

Sbjct: 385 ACATGCTAAACTTCAGTTCA 366  
>novel\_mir\_193 Score: 0.5 R03G\_02348  
Query: 1 TGTATGATTTGAAGTCAAGT 20  
|||||:|||||

Sbjct: 97 ACATACTGAACTTCAGTTCA 78  
>novel\_mir\_193 Score: 0.5 R03G\_02354  
Query: 1 TGTATGATTTGAAGTCAAGT 20  
||||:|||||

Sbjct: 385 ACATGCTAAACTTCAGTTCA 366  
>novel\_mir\_193 Score: 0.0 R03G\_02936  
Query: 1 TGTATGATTTGAAGTCAAGT 20  
|||||

Sbjct: 385 ACATACTAAACTTCAGTTCA 366  
>novel\_mir\_193 Score: 0.5 R03G\_04104  
Query: 1 TGTATGATTTGAAGTCAAGT 20  
||||:|||||

Sbjct: 82 ACATGCTAAACTTCAGTTCA 63

>novel\_mir\_193 Score: 0.5 R03G\_04110  
Query: 1 TGTATGATTTGAAGTCAAGT 20  
||||:|||||||  
Sbjct: 82 ACATGCTAAACTTCAGTTCA 63  
>novel\_mir\_193 Score: 2.0 R03G\_00277  
Query: 1 TGTATGATTTGAAGTCAAGT 20  
||||\*|||||:||\*||  
Sbjct: 1905 ACATAATAAACTTTAGT-CA 1887  
>novel\_mir\_193 Score: 0.5 R03G\_01528  
Query: 1 TGTATGATTTGAAGTCAAGT 20  
||||:|||||||  
Sbjct: 112 ACATGCTAAACTTCAGTTCA 93  
>novel\_mir\_193 Score: 1.5 R03G\_01545  
Query: 1 TGTATGATTTGAAGTCAAGT 20  
||||:||||||\*||||  
Sbjct: 349 ACATGCTAAACTTCCGTTCA 330  
>novel\_mir\_193 Score: 0.5 R03G\_01636  
Query: 1 TGTATGATTTGAAGTCAAGT 20  
||||:|||||||  
Sbjct: 334 ACATGCTAAACTTCAGTTCA 315  
>novel\_mir\_193 Score: 0.0 R03G\_01923  
Query: 1 TGTATGATTTGAAGTCAAGT 20  
|||||||  
Sbjct: 334 ACATACTAAACTTCAGTTCA 315  
>novel\_mir\_193 Score: 0.8 R03G\_02016  
Query: 1 TGTATGATTTGAAGTCAAGT 20  
||||:|||||||:|  
Sbjct: 82 ACATGCTAAACTTCAGTTTA 63  
>novel\_mir\_193 Score: 1.0 R03G\_02168  
Query: 1 TGTATGATTTGAAGTCAAGT 20  
||||:||||:|||||||  
Sbjct: 334 ACATGCTAAATTTTCAGTTCA 315  
>novel\_mir\_150 Score: 1.5 R03G\_16819  
Query: 1 TTTGACGGCCACTGTATATTAG 22  
|||||||:|\*||\*|  
Sbjct: 304 AAACTGCCGGTGACATGGAA-C 284  
>novel\_mir\_150 Score: 1.0 R03G\_15882  
Query: 1 TTTGACGGCCACTGTATATTAG 22  
|||||||:|\*||\*|  
Sbjct: 816 AAACTGCCGGTGACATACAA-C 796  
>novel\_mir\_150 Score: 0.8 R03G\_07130  
Query: 1 TTTGACGGCCACTGTATATTAG 22  
|||||||:|\*|||:  
Sbjct: 1427 AAACTGCCGGTGACATAAAATT 1406  
>novel\_mir\_150 Score: 0.8 R03G\_03787

Query: 1 TTTGACGGCCACTGTATATTAG 22  
|||||||:|\*|  
Sbjct: 420 AACTGCCGGTGACATATAGAC 399  
>novel\_mir\_150 Score: 1.8 R03G\_00684  
Query: 1 TTTGACGGCCACTGTATATTAG 22  
|||||||\*||\*|:  
Sbjct: 1591 AACTGCCGGTGACATCTATTT 1570  
>novel\_mir\_167 Score: 2.2 R03G\_17033  
Query: 1 TAATTGTAAGGCCATATTCTAG 22  
|||||:|:||||\*|:|:  
Sbjct: 1054 ATTAACGTTCTGGTATTAGATT 1033  
>novel\_mir\_167 Score: 2.2 R03G\_16793  
Query: 1 TAATTGTAAGGCCATATTCTAG 22  
|||||:|:||||\*|:|:  
Sbjct: 112 ATTAACGTTCTGGTATTAGATT 91  
>novel\_mir\_167 Score: 2.2 R03G\_12138  
Query: 1 TAATTGTAAGGCCATATTCTAG 22  
|||||\*||:||||||:|  
Sbjct: 412 ATTAACGATCTGGTATAAGGTC 391  
>novel\_mir\_167 Score: 2.2 R03G\_12456  
Query: 1 TAATTGTAAGGCCATATTCTAG 22  
|||||:|:||||\*|:|:  
Sbjct: 1036 ATTAACGTTCTGGTATTAGATT 1015  
>novel\_mir\_167 Score: 2.2 R03G\_09361  
Query: 1 TAATTGTAAGGCCATATTCTAG 22  
|||||\*||:||||||:|  
Sbjct: 346 ATTAACGATCTGGTATAAGGTC 325  
>novel\_mir\_167 Score: 2.2 R03G\_09507  
Query: 1 TAATTGTAAGGCCATATTCTAG 22  
|||||:|:||||\*|:|:  
Sbjct: 1108 ATTAACGTTCTGGTATTAGATT 1087  
>novel\_mir\_167 Score: 2.2 R03G\_08181  
Query: 1 TAATTGTAAGGCCATATTCTAG 22  
|||||:|:||||\*|:|:  
Sbjct: 811 ATTAACGTTCTGGTATTAGATT 790  
>novel\_mir\_167 Score: 2.5 R03G\_07834  
Query: 1 TAATTGTAAGGCCATATTCTAG 22  
|||\*|\*|:|||||||  
Sbjct: 703 ATTACCGGTCCGGTATAAGATC 682  
>novel\_mir\_167 Score: 0.0 R03G\_06718  
Query: 1 TAATTGTAAGGCCATATTCTAG 22  
|||||||  
Sbjct: 379 ATTAACATTCCGGTATAAGATC 358  
>novel\_mir\_167 Score: 2.5 R03G\_04583  
Query: 1 TAATTGTAAGGCCATATTCTAG 22

||||\*|:||||:|||||||\*||  
Sbjct: 1198 ATTATCGTTCTGGTATAAGCTC 1177  
>novel\_mir\_167 Score: 0.5 R03G\_02390  
Query: 1 TAATTGTAAGGCCATATTCTAG 22  
|||||:|||||||  
Sbjct: 112 ATTAACGTTCCGGTATAAGATC 91  
>novel\_mir\_167 Score: 2.2 R03G\_03515  
Query: 1 TAATTGTAAGGCCATATTCTAG 22  
|||||:|||:||||\*|||:  
Sbjct: 748 ATTAACGTTCTGGTATTAGATT 727  
>novel\_mir\_167 Score: 2.2 R03G\_04030  
Query: 1 TAATTGTAAGGCCATATTCTAG 22  
|||||:\*||:|||||||:||  
Sbjct: 598 ATTAACGATCTGGTATAAGGTC 577  
>novel\_mir\_167 Score: 2.2 R03G\_00133  
Query: 1 TAATTGTAAGGCCATATTCTAG 22  
|||||:|||:||||\*|||:  
Sbjct: 112 ATTAACGTTCTGGTATTAGATT 91  
>novel\_mir\_167 Score: 2.2 R03G\_00150  
Query: 1 TAATTGTAAGGCCATATTCTAG 22  
|||||:|||:||||\*|||:  
Sbjct: 112 ATTAACGTTCTGGTATTAGATT 91  
>novel\_mir\_154 Score: 2.5 R03G\_17083  
Query: 1 TAGGTTTCATCTGTTGTAGAGAT 22  
|||:|||||||:|\*\*|\*|  
Sbjct: 834 ATCTAAGTAGACAACGTACCAA 813  
>novel\_mir\_154 Score: 0.0 R03G\_16160  
Query: 1 TAGGTTTCATCTGTTGTAGAGAT 22  
|||||||  
Sbjct: 235 ATCCAAGTAGACAACATCTCTA 214  
>novel\_mir\_154 Score: 2.2 R03G\_16015  
Query: 1 TAGGTTTCATCTGTTGTAGAGAT 22  
:||:||||||\*||||\*|||  
Sbjct: 1813 GTCTAAGTAGAGAACAT-TCTA 1793  
>novel\_mir\_154 Score: 0.0 R03G\_14219  
Query: 1 TAGGTTTCATCTGTTGTAGAGAT 22  
|||||||  
Sbjct: 235 ATCCAAGTAGACAACATCTCTA 214  
>novel\_mir\_154 Score: 1.2 R03G\_13308  
Query: 1 TAGGTTTCATCTGTTGTAGAGAT 22  
||:|||||||:||||:||  
Sbjct: 217 ATTCAAGTAGACAATATCTTTA 196  
>novel\_mir\_154 Score: 2.5 R03G\_11289  
Query: 1 TAGGTTTCATCTGTTGTAGAGAT 22  
\*|:|||||||:|||\*|\*||



Sbjct: 1753 TTTCAAGTAGACAGCATAT-TA 1733  
>novel\_mir\_154 Score: 0.0 R03G\_10242  
Query: 1 TAGGTTTCATCTGTTGTAGAGAT 22  
|||||

Sbjct: 235 ATCCAAGTAGACAACATCTCTA 214  
>novel\_mir\_154 Score: 0.5 R03G\_10303  
Query: 1 TAGGTTTCATCTGTTGTAGAGAT 22  
\*|||||

Sbjct: 175 CTCCAAGTAGACAACATCTCTA 154  
>novel\_mir\_154 Score: 0.0 R03G\_10415  
Query: 1 TAGGTTTCATCTGTTGTAGAGAT 22  
|||||

Sbjct: 217 ATCCAAGTAGACAACATCTCTA 196  
>novel\_mir\_154 Score: 0.0 R03G\_10665  
Query: 1 TAGGTTTCATCTGTTGTAGAGAT 22  
|||||

Sbjct: 259 ATCCAAGTAGACAACATCTCTA 238  
>novel\_mir\_154 Score: 0.0 R03G\_09224  
Query: 1 TAGGTTTCATCTGTTGTAGAGAT 22  
|||||

Sbjct: 190 ATCCAAGTAGACAACATCTCTA 169  
>novel\_mir\_154 Score: 1.0 R03G\_09415  
Query: 1 TAGGTTTCATCTGTTGTAGAGAT 22  
|||||\*|||||

Sbjct: 229 ATCCAAATAGACAACATCTCTA 208  
>novel\_mir\_154 Score: 2.2 R03G\_09689  
Query: 1 TAGGTTTCATCTGTTGTAGAGAT 22  
:|||||:|:|\*|||||

Sbjct: 1252 GTCCAAGTAGGTAGCATGTCTA 1231  
>novel\_mir\_154 Score: 0.0 R03G\_08103  
Query: 1 TAGGTTTCATCTGTTGTAGAGAT 22  
|||||

Sbjct: 130 ATCCAAGTAGACAACATCTCTA 109  
>novel\_mir\_154 Score: 0.0 R03G\_08369  
Query: 1 TAGGTTTCATCTGTTGTAGAGAT 22  
|||||

Sbjct: 235 ATCCAAGTAGACAACATCTCTA 214  
>novel\_mir\_154 Score: 0.5 R03G\_06787  
Query: 1 TAGGTTTCATCTGTTGTAGAGAT 22  
|||:|||||

Sbjct: 235 ATCCGAGTAGACAACATCTCTA 214  
>novel\_mir\_154 Score: 2.5 R03G\_05232  
Query: 1 TAGGTTTCATCTGTTGTAGAGAT 22  
\*|||:|||||:||||\*||\*|

Sbjct: 1627 TTCCGAGTAGACGACATATCAA 1606

>novel\_mir\_154 Score: 0.0 R03G\_03080  
Query: 1 TAGGTTTCATCTGTTGTAGAGAT 22  
|||||  
Sbjct: 148 ATCCAAGTAGACAACATCTCTA 127  
>novel\_mir\_154 Score: 0.0 R03G\_03876  
Query: 1 TAGGTTTCATCTGTTGTAGAGAT 22  
|||||  
Sbjct: 235 ATCCAAGTAGACAACATCTCTA 214  
>novel\_mir\_154 Score: 0.5 R03G\_04133  
Query: 1 TAGGTTTCATCTGTTGTAGAGAT 22  
|||||\*|  
Sbjct: 46 ATCCAAGTAGACAACATCTCCA 25  
>novel\_mir\_154 Score: 0.5 R03G\_00384  
Query: 1 TAGGTTTCATCTGTTGTAGAGAT 22  
|||||:|||||  
Sbjct: 118 ATCCAAGTAGACGACATCTCTA 97  
>novel\_mir\_164 Score: 0.8 R03G\_12001  
Query: 1 TCCAAGTGCAGACGAGCTTTAC 23  
:|||||\*|||||  
Sbjct: 639 GGGTTGACAGTCTGCTCAAAATG 617  
>novel\_mir\_164 Score: 1.5 R03G\_10264  
Query: 1 TCCAAGTGCAGACGAGCTTTAC 23  
|||||\*|||||\*|||||  
Sbjct: 657 AGGTTGACAATCTGCTCAAAATG 635  
>novel\_mir\_164 Score: 0.8 R03G\_10556  
Query: 1 TCCAAGTGCAGACGAGCTTTAC 23  
:|||||\*|||||  
Sbjct: 639 GGGTTGACAGTCTGCTCAAAATG 617  
>novel\_mir\_164 Score: 0.8 R03G\_00617  
Query: 1 TCCAAGTGCAGACGAGCTTTAC 23  
:|||||\*|||||  
Sbjct: 483 GGGTTGACAGTCTGCTCAAAATG 461  
>novel\_mir\_164 Score: 0.8 R03G\_01302  
Query: 1 TCCAAGTGCAGACGAGCTTTAC 23  
:|||||\*|||||  
Sbjct: 210 GGGTTGACAGTCTGCTCAAAATG 188  
>novel\_mir\_164 Score: 0.8 R03G\_17369  
Query: 1 TCCAAGTGCAGACGAGCTTTAC 23  
:|||||\*|||||  
Sbjct: 639 GGGTTGACAGTCTGCTCAAAATG 617  
>novel\_mir\_178 Score: 2.2 R03G\_16301  
Query: 1 TAATGATATAAAGAAGAGCAAG 22  
||||:|||\*|||||\*||:  
Sbjct: 1203 ATTATTATTTTCTTCTCATTT 1182  
>novel\_mir\_178 Score: 2.0 R03G\_11898



:|||||\*|||||||\*|||  
Sbjct: 497 GACTCGAAGTTGAAGTTAACTA 476  
>novel\_mir\_205 Score: 1.8 R03G\_13752  
Query: 1 TTGAGCTGCAACTTCAATGGAT 22  
:|||||\*|||||||\*|||  
Sbjct: 497 GACTCGAAGTTGAAGTTAACTA 476  
>novel\_mir\_205 Score: 1.8 R03G\_12950  
Query: 1 TTGAGCTGCAACTTCAATGGAT 22  
:|||||\*|||||||\*|||  
Sbjct: 497 GACTCGAAGTTGAAGTTAACTA 476  
>novel\_mir\_205 Score: 1.8 R03G\_12084  
Query: 1 TTGAGCTGCAACTTCAATGGAT 22  
:|||||\*|||||||\*|||  
Sbjct: 450 GACTCGAAGTTGAAGTTAACTA 429  
>novel\_mir\_205 Score: 1.8 R03G\_11536  
Query: 1 TTGAGCTGCAACTTCAATGGAT 22  
:|||||\*|||||||\*|||  
Sbjct: 497 GACTCGAAGTTGAAGTTAACTA 476  
>novel\_mir\_205 Score: 1.8 R03G\_10785  
Query: 1 TTGAGCTGCAACTTCAATGGAT 22  
:|||||\*|||||||\*|||  
Sbjct: 450 GACTCGAAGTTGAAGTTAACTA 429  
>novel\_mir\_205 Score: 2.5 R03G\_09918  
Query: 1 TTGAGCTGCAACTTCAATGGAT 22  
|||||||\*||\*||\*|  
Sbjct: 93 AACTCGACGTTGAAATAACC-A 73  
>novel\_mir\_205 Score: 1.8 R03G\_09926  
Query: 1 TTGAGCTGCAACTTCAATGGAT 22  
:|||||\*|||||||\*|||  
Sbjct: 497 GACTCGAAGTTGAAGTTAACTA 476  
>novel\_mir\_205 Score: 1.8 R03G\_10050  
Query: 1 TTGAGCTGCAACTTCAATGGAT 22  
:|||||\*|||||||\*|||  
Sbjct: 497 GACTCGAAGTTGAAGTTAACTA 476  
>novel\_mir\_205 Score: 2.2 R03G\_10087  
Query: 1 TTGAGCTGCAACTTCAATGGAT 22  
|||||||\*||\*||\*||  
Sbjct: 204 AACTCGACGTTGGACTTAGTTA 183  
>novel\_mir\_205 Score: 2.5 R03G\_08462  
Query: 1 TTGAGCTGCAACTTCAATG-GAT 22  
\*|||||||\*||\*||\*||  
Sbjct: 906 TACTCGACGTTGTAGTTACAATA 884  
>novel\_mir\_205 Score: 1.8 R03G\_07723  
Query: 1 TTGAGCTGCAACTTCAATGGAT 22  
:|||||\*|||||||\*|||

Sbjct: 497 GACTCGAAGTTGAAGTTAACTA 476  
>novel\_mir\_205 Score: 1.8 R03G\_05522  
Query: 1 TTGAGCTGCAACTTCAATGGAT 22  
:|||||\*|||||||\*|||

Sbjct: 863 GACTCGAAGTTGAAGTTAACTA 842  
>novel\_mir\_205 Score: 2.5 R03G\_06044  
Query: 1 TTGAGCTGCAACTTCAATGGAT 22  
|||||||\*|||\*||\*|||

Sbjct: 153 AACTCGACGATGAACTT-CCTA 133  
>novel\_mir\_205 Score: 1.8 R03G\_05516  
Query: 1 TTGAGCTGCAACTTCAATGGAT 22  
:|||||\*|||||||\*|||

Sbjct: 497 GACTCGAAGTTGAAGTTAACTA 476  
>novel\_mir\_205 Score: 1.8 R03G\_03112  
Query: 1 TTGAGCTGCAACTTCAATGGAT 22  
:|||||\*|||||||\*|||

Sbjct: 863 GACTCGAAGTTGAAGTTAACTA 842  
>novel\_mir\_205 Score: 1.8 R03G\_03560  
Query: 1 TTGAGCTGCAACTTCAATGGAT 22  
:|||||\*|||||||\*|||

Sbjct: 497 GACTCGAAGTTGAAGTTAACTA 476  
>novel\_mir\_205 Score: 1.8 R03G\_03791  
Query: 1 TTGAGCTGCAACTTCAATGGAT 22  
:|||||\*|||||||\*|||

Sbjct: 497 GACTCGAAGTTGAAGTTAACTA 476  
>novel\_mir\_205 Score: 1.8 R03G\_00240  
Query: 1 TTGAGCTGCAACTTCAATGGAT 22  
:|||||\*|||||||\*|||

Sbjct: 806 GACTCGAAGTTGAAGTTAACTA 785  
>novel\_mir\_205 Score: 1.8 R03G\_00250  
Query: 1 TTGAGCTGCAACTTCAATGGAT 22  
:|||||\*|||||||\*|||

Sbjct: 450 GACTCGAAGTTGAAGTTAACTA 429  
>novel\_mir\_205 Score: 1.8 R03G\_01725  
Query: 1 TTGAGCTGCAACTTCAATGGAT 22  
:|||||\*|||||||\*|||

Sbjct: 497 GACTCGAAGTTGAAGTTAACTA 476  
>novel\_mir\_205 Score: 1.8 R03G\_02227  
Query: 1 TTGAGCTGCAACTTCAATGGAT 22  
:|||||\*|||||||\*|||

Sbjct: 863 GACTCGAAGTTGAAGTTAACTA 842  
>novel\_mir\_205 Score: 1.8 R03G\_17423  
Query: 1 TTGAGCTGCAACTTCAATGGAT 22  
:|||||\*|||||||\*|||

Sbjct: 497 GACTCGAAGTTGAAGTTAACTA 476

>novel\_mir\_205 Score: 1.8 R03G\_17328  
Query: 1 TTGAGCTGCAACTTCAATGGAT 22  
:|||||\*|||||||\*|||  
Sbjct: 497 GACTCGAAGTTGAAGTAACTA 476

>novel\_mir\_205 Score: 1.8 R03G\_17092  
Query: 1 TTGAGCTGCAACTTCAATGGAT 22  
:|||||\*|||||||\*|||  
Sbjct: 497 GACTCGAAGTTGAAGTAACTA 476

>novel\_mir\_129 Score: 2.5 R03G\_08889  
Query: 1 TTCGAGCCACGCTTTATTTTCA 22  
\*||||:|||||||:|\*|||  
Sbjct: 485 CAGCTTGGTGCGAAGTACTAGT 464

>novel\_mir\_129 Score: 2.5 R03G\_06935  
Query: 1 TTCGAGCCACGCTTTATTTTCA 22  
|||:|\*|||||||:|\*|||  
Sbjct: 440 AAGTTCTGTGCGAAGTA-AAGT 420

>novel\_mir\_207 Score: 2.0 R03G\_16387  
Query: 1 TACTGTGACGCAGTTGGTGTA 22  
|\*|||\*|||||||\*|||  
Sbjct: 142 ACAACACTGCGTCAACCACATT 121

>novel\_mir\_206 Score: 0.0 R03G\_05919  
Query: 1 TCGTTGTTATACTCTAGATCAA 22  
|||||\*|||||||\*|||  
Sbjct: 1775 AGCAACAATATGAGATCTAGTT 1754

>novel\_mir\_177 Score: 1.5 R03G\_16547  
Query: 2 TTAATAAGGAAAATACGACATA 23  
|||||\*|||||||\*|||  
Sbjct: 420 AATTATTCCTTTTATGCTGTGA 399

>novel\_mir\_177 Score: 0.8 R03G\_15587  
Query: 2 TTAATAAGGAAAATACGACATA 23  
|||||\*|||||||\*|||  
Sbjct: 324 AATTATTCCTTTTATGCTGTAT 303

>novel\_mir\_177 Score: 0.5 R03G\_10220  
Query: 1 TTTAATAAGGAAAATACGAC-ATA 23  
|||||\*|||||||\*|||  
Sbjct: 359 AAATTATTCCTTTTATGCTGTTAT 336

>novel\_mir\_177 Score: 0.5 R03G\_00300  
Query: 1 TTTAATAAGGAAAATACGACAT-A 23  
|||||\*|||||||\*|||  
Sbjct: 776 AAATTATTCCTTTTATGCTGTACT 753

>novel\_mir\_177 Score: 0.5 R03G\_00682  
Query: 1 TTTAATAAGGAAAATACGACATA 23  
|||||\*|||||||\*|||  
Sbjct: 674 AAATTATTCCTTTTATGCTGT-T 653

>novel\_mir\_177 Score: 2.5 R03G\_01050

Query: 1 TTTAATAAGGAAAATACGACATA 23  
||||:|||||||\*|||\*|\*  
Sbjct: 284 AAATTGTTCTTTTACGCTG-AG 263  
>novel\_mir\_148 Score: 2.5 R03G\_15570  
Query: 1 TTTTTTTTTGTGTGTGTGTG 20  
|||:|:||||\*||||\*||  
Sbjct: 656 AAAAGAGAACAAACACA-AC 638  
>novel\_mir\_148 Score: 2.5 R03G\_14409  
Query: 1 TTTTTTTTTGTGTGTGTGTG 20  
\*|||:|||||||\*|||\*||  
Sbjct: 226 CAAAGAAAACACAAACA-AC 208  
>novel\_mir\_148 Score: 2.5 R03G\_14754  
Query: 1 TTTTTTTTTGTGTGTGTGTG 20  
\*|:|\*|\*|||||||\*|||\*||  
Sbjct: 81 CAGAACAAACACACACACAA 62  
>novel\_mir\_148 Score: 2.5 R03G\_14331  
Query: 1 TTTTTTTTTGTGTGTGTGTG 20  
||:|||||||\*|||:|\*||  
Sbjct: 438 AAGAAAAACCCACGCAAAC 419  
>novel\_mir\_148 Score: 2.2 R03G\_13587  
Query: 1 TTTTTTTTTGTGTGTGTGTG 20  
:|||||:||||||\*||:|||  
Sbjct: 225 GAAAAAGAACACAAACGCAC 206  
>novel\_mir\_148 Score: 2.5 R03G\_13701  
Query: 1 TTTTTTTTTGTGTGTGTGTG 20  
:|\*|||:|||||||\*||:|\*|  
Sbjct: 3220 GATAAAAGACACACACATTC 3201  
>novel\_mir\_148 Score: 2.5 R03G\_13855  
Query: 1 TTTTTTTTTGTGTGTGTGTG 20  
:|\*|||:|||||||\*||:|\*|  
Sbjct: 3220 GATAAAAGACACACACATTC 3201  
>novel\_mir\_148 Score: 2.5 R03G\_12014  
Query: 1 TTTTTTTTTGTGTGTGTGTG 20  
:|\*|||:|||||||\*||:|\*|  
Sbjct: 3220 GATAAAAGACACACACATTC 3201  
>novel\_mir\_148 Score: 2.5 R03G\_12067  
Query: 1 TTTTTTTTTGTGTGTGTGTG 20  
:|\*|||:|||||||\*||:|\*|  
Sbjct: 3220 GATAAAAGACACACACATTC 3201  
>novel\_mir\_148 Score: 2.5 R03G\_12473  
Query: 1 TTTTTTTTTGTGTGTGTGTG 20  
|||:||:||||:||||\*::  
Sbjct: 501 AAAGAAGAACATACACA-GT 483  
>novel\_mir\_148 Score: 2.2 R03G\_11862  
Query: 1 TTTTTTTTTGTGTGTGTGTG 20

|:|:|:|:|:|:|:|:|\*|:  
Sbjct: 686 AGAGAAAGACACACACA-AT 668  
>novel\_mir\_148 Score: 2.2 R03G\_10257  
Query: 1 TTTTTTTTTGTGTGTGTGTG 20  
|:|:|:|:|:|\*|:|:|:  
Sbjct: 347 AGAAAAAACAAACATATAC 328  
>novel\_mir\_148 Score: 2.2 R03G\_09382  
Query: 1 TTTTTTTTTGTGTGTGTGTG 20  
:|:|:|:|:|:|:|:|:|:|:  
Sbjct: 1362 GAAAAGAAACATACATACGT 1343  
>novel\_mir\_148 Score: 2.2 R03G\_09727  
Query: 1 TTTTTTTTTGTGTGTGTGTG 20  
|:|:|\*|:|:|:|:|:|:|\*|:  
Sbjct: 428 AAAACAGAACACACACATAA 409  
>novel\_mir\_148 Score: 2.5 R03G\_10222  
Query: 1 TTTTTTTTTGTGTGTGTGTG 20  
:|\*|:|:|:|:|:|:|:|\*|:  
Sbjct: 3220 GATAAAAGACACACACATTC 3201  
>novel\_mir\_148 Score: 2.2 R03G\_08316  
Query: 1 TTTTTTTTTGTGTGTGTGTG 20  
::|:|:|:|:|:|:|:|:|\*|:  
Sbjct: 427 GGAAAAAAGCACACATAAAC 408  
>novel\_mir\_148 Score: 2.2 R03G\_09029  
Query: 1 TTTTTTTTTGTGTGTGTGTG 20  
:|:|:|\*|:|:|:|:|:|\*|:  
Sbjct: 1194 GAAAACGAACACACACAGAC 1175  
>novel\_mir\_148 Score: 2.5 R03G\_07466  
Query: 1 TTTTTTTTTGTGTGTGTGTG 20  
|:|:|:|:|:|:|\*|:|:|\*|:  
Sbjct: 685 AAAAAGAAACACTTACACAG 666  
>novel\_mir\_148 Score: 2.2 R03G\_07480  
Query: 1 TTTTTTTTTGTGTGTGTGTG 20  
|:|:|:|:|:|:|:|:|:|:|:  
Sbjct: 165 AAAGAAAAACGCACGTACAT 146  
>novel\_mir\_148 Score: 2.5 R03G\_07654  
Query: 1 TTTTTTTTTGTGTGTGTGTG 20  
:|:|:|:|:|:|:|:|\*|:|:  
Sbjct: 1191 GAAAAGAAACACGCATA-AT 1173  
>novel\_mir\_148 Score: 2.5 R03G\_06095  
Query: 1 TTTTTTTTTGTGTGTGTGTG 20  
|:|:|:|:|:|\*|:|:|\*|:  
Sbjct: 197 AAGAAAAGACTCACACA-AC 179  
>novel\_mir\_148 Score: 2.5 R03G\_06107  
Query: 1 TTTTTTTTTGTGTGTGTGTG 20  
\*|:|:|:|:|:|:|:|:|:|:



Sbjct: 1260 TAAAAAAGTATACACATAT 1241  
>novel\_mir\_148 Score: 1.8 R03G\_06366  
Query: 1 TTTTTTTTTGTGTGTGTGTG 20  
||||:|::|||||||:|  
Sbjct: 266 AAAAGAGGACACACACACGC 247  
>novel\_mir\_148 Score: 2.5 R03G\_06377  
Query: 1 TTTTTTTTTGTGTGTGTGTG 20  
||:|:|\*|||\*||  
Sbjct: 39 AAGAAGAAAGACACACAGAC 20  
>novel\_mir\_148 Score: 2.2 R03G\_04455  
Query: 1 TTTTTTTTTGTGTGTGTGTG 20  
|||||||:|\*|\*:  
Sbjct: 225 AAAAAAAACACGCACTC-T 207  
>novel\_mir\_148 Score: 2.2 R03G\_04561  
Query: 1 TTTTTTTTTGTGTGTGTGTG 20  
|:|||||||\*|||\*|  
Sbjct: 193 AGAAAAAACAAACACA-GC 175  
>novel\_mir\_148 Score: 2.0 R03G\_05011  
Query: 1 TTTTTTTTTGTGTGTGTGTG 20  
:|\*|||:|||||||:|:  
Sbjct: 613 GAAACAAAACACACATACAT 594  
>novel\_mir\_148 Score: 2.5 R03G\_05317  
Query: 1 TTTTTTTTTGTGTGTGTGTG 20  
|||:|||||||:|\*||\*||  
Sbjct: 214 AAAGAAAACATAAACA-AC 196  
>novel\_mir\_148 Score: 2.5 R03G\_03575  
Query: 1 TTTTTTTTTGTGTGTGTGTG 20  
:|\*|||:|||||||:|\*|  
Sbjct: 3220 GATAAAAGACACACACATTC 3201  
>novel\_mir\_148 Score: 2.5 R03G\_03752  
Query: 1 TTTTTTTTTGTGTGTGTGTG 20  
:|\*|||:|||||||:|\*|  
Sbjct: 3220 GATAAAAGACACACACATTC 3201  
>novel\_mir\_148 Score: 2.5 R03G\_03796  
Query: 1 TTTTTTTTTGTGTGTGTGTG 20  
:|\*|||:|||||||:|\*|  
Sbjct: 2413 GATAAAAGACACACACATTC 2394  
>novel\_mir\_148 Score: 2.2 R03G\_00847  
Query: 1 TTTTTTTTTGTGTGTGTGTG 20  
||||:|::|||||||\*|  
Sbjct: 107 AAAAGAGGACACACACAGGC 88  
>novel\_mir\_157 Score: 2.5 R03G\_04984  
Query: 1 TTATGTGCTAATGAAAGGTG-T 21  
|\*|||||||:||||\*||\*|  
Sbjct: 450 ACTACACGATTATTTTCAACTA 429

>novel\_mir\_157 Score: 2.5 R03G\_02509  
Query: 1 TTATGTGCTAATGAAAGGTGT 21  
\*|||\*|||||||:|||\*  
Sbjct: 2129 TATAGACGATTACTTTTCACT 2109  
>novel\_mir\_157 Score: 2.5 R03G\_01603  
Query: 1 TTATGTGCTAATGAAAGGTGT 21  
\*||\*|:|||||||\*|  
Sbjct: 338 CATCCGCGATTACTTTCCA-A 319  
>novel\_mir\_157 Score: 2.5 R03G\_02213  
Query: 1 TTATGTGCTAATGAAAGGTGT 21  
|||||||:|\*|\*|||  
Sbjct: 821 AATACACGATTATTATT-ACA 802  
>novel\_mir\_131 Score: 0.0 R03G\_16607  
Query: 1 TCATAACGTTGGCCTTTGTTTCAT 23  
|||||||  
Sbjct: 341 AGTATTGCAACCGGAAACAAGTA 319  
>novel\_mir\_131 Score: 0.5 R03G\_16503  
Query: 1 TCATAACGTTGGCCTTTGTTTCAT 23  
|||||||:|||||||  
Sbjct: 77 AGTATTGCAACTGGAAACAAGTA 55  
>novel\_mir\_131 Score: 2.5 R03G\_13811  
Query: 1 TCATAACGTTGGCCTTTGTTTCAT 23  
||||\*||||:|||||||  
Sbjct: 212 AGTATAGCAACTAGAAACAAGTA 190  
>novel\_mir\_131 Score: 0.0 R03G\_13025  
Query: 1 TCATAACGTTGGCCTTTGTTTCAT 23  
|||||||  
Sbjct: 341 AGTATTGCAACCGGAAACAAGTA 319  
>novel\_mir\_131 Score: 2.5 R03G\_09411  
Query: 1 TCATAACGTTGGCCTTTGTTTC-AT 23  
\*||:|||||||:||||\*||  
Sbjct: 920 TGTGTTGCAACCGGAAGAAAGTTA 897  
>novel\_mir\_131 Score: 2.0 R03G\_07992  
Query: 1 TCATAACGTTGGCCTTTGTT-CAT 23  
|||:||||\*|||||||\*|||  
Sbjct: 545 AGTGTTGCTACCGGAAACAAGGTA 522  
>novel\_mir\_131 Score: 2.2 R03G\_07864  
Query: 1 TCATAACGTTGGCCTTTGTTTCAT 23  
:||||\*|:|||||||\*|  
Sbjct: 169 GGTATAGTAACCGGAAACAAGGA 147  
>novel\_mir\_131 Score: 2.0 R03G\_07972  
Query: 1 TCATAACGTTGGCCTTTGTT-CAT 23  
|||:||||\*|||||||\*|||  
Sbjct: 1175 AGTGTTGCTACCGGAAACAAGGTA 1152  
>novel\_mir\_131 Score: 2.2 R03G\_04810

Query: 1 TCATAACGTTGGCCTTTGTTTCAT 23  
:||||\*|:|||||\*|  
Sbjct: 169 GGTATAGTAACCGGAAACAAGGA 147  
>novel\_mir\_131 Score: 0.0 R03G\_03548  
Query: 1 TCATAACGTTGGCCTTTGTTTCAT 23  
|||||\*|:|||||\*|  
Sbjct: 341 AGTATTGCAACCGGAAACAAGTA 319  
>novel\_mir\_131 Score: 0.0 R03G\_01046  
Query: 1 TCATAACGTTGGCCTTTGTTTCAT 23  
|||||\*|:|||||\*|  
Sbjct: 338 AGTATTGCAACCGGAAACAAGTA 316  
>novel\_mir\_131 Score: 2.2 R03G\_16920  
Query: 1 TCATAACGTTGGCCTTTGTTTCAT 23  
:||||\*|:|||||\*|  
Sbjct: 25 GGTATAGTAACCGGAAACAAGGA 3  
>novel\_mir\_209 Score: 2.0 R03G\_05351  
Query: 1 AGAATCTGGGCCTAAAGGTC 20  
|||||\*||\*|||  
Sbjct: 225 TCTTAGACACGCATTTCCAG 206  
>novel\_mir\_173 Score: 2.5 R03G\_05049  
Query: 1 TGATCTTGATCGTCCAAATCAAC 23  
|||||\*||\*||\*|||  
Sbjct: 761 ACTAGAACGAGCAGGTGTA-TTG 740  
>novel\_mir\_135 Score: 2.2 R03G\_04341  
Query: 1 TGGTAGATGAAGAATGTTTTTC 22  
|||||\*||\*||\*||\*|||  
Sbjct: 1027 ACCATCTACTTCTTCTAAAGAA 1006  
>novel\_mir\_137 Score: 2.0 R03G\_14686  
Query: 1 TTGTGAAGGACTGGTCAGGGT 21  
:|||||:||||\*|||:|||  
Sbjct: 1536 GACACTTTCTGAACAGTTCCA 1516  
>novel\_mir\_137 Score: 1.2 R03G\_08467  
Query: 1 TTGTGAAGGACTGGTCAGGGT 21  
|||||\*|||:|  
Sbjct: 886 AACACTTCCTGACCAATCCCG 866  
>novel\_mir\_137 Score: 1.5 R03G\_04742  
Query: 1 TTGTGAAGGACTGGTCAGGGT 21  
|||:|||||\*|||  
Sbjct: 229 AACGCTTCCTGACCAATCCCA 209  
>novel\_mir\_172 Score: 0.2 R03G\_16259  
Query: 1 TTTCCAGTATCAGGATGTCT 20  
|||||\*|||:||  
Sbjct: 761 AAAGGTCATAGTCCTACGGA 742  
>novel\_mir\_172 Score: 0.0 R03G\_15174  
Query: 1 TTTCCAGTATCAGGATGTCT 20



Sbjct: 773 AAAGGTCATAGTCCTACGGA 754  
>novel\_mir\_172 Score: 0.0 R03G\_01250  
Query: 1 TTTCCAGTATCAGGATGTCT 20  
|||||

Sbjct: 461 AAAGGTCATAGTCCTACAGA 442  
>novel\_mir\_172 Score: 0.8 R03G\_01395  
Query: 1 TTTCCAGTATCAGGATGTCT 20  
|||||:|:|

Sbjct: 296 AAAGGTCATAGTCTTACGGA 277  
>novel\_mir\_165 Score: 2.2 R03G\_08227  
Query: 1 TGGTGTAGATGTACGTGGTACA 22  
|||||\*|:|\*|

Sbjct: 624 ACCACACCTACATGCACTA-GA 604  
>novel\_mir\_184 Score: 2.2 R03G\_12935  
Query: 1 TTTGACTTTTCTTTAGGGTG 20  
|||||\*|:|:

Sbjct: 59 AAAGTAAAAGAAAGTATCAT 40  
>novel\_mir\_184 Score: 2.5 R03G\_08795  
Query: 1 TTTGACTTTTCTTTAGGGTG 20  
\*|:|\*|:|

Sbjct: 62 TAATTGAAAAGAAAACCTCAC 43  
>novel\_mir\_184 Score: 2.0 R03G\_08868  
Query: 1 TTTGACTTTTCTTTAGGGTG 20  
|:|\*|:|

Sbjct: 20 AGACTGAAAAGAAATCT-GT 2  
>novel\_mir\_184 Score: 2.5 R03G\_07498  
Query: 1 TTTGACTTTTCTTTAGGGTG 20  
||||\*|\*|:|

Sbjct: 584 AAACGGAAAAGAAATCGTGC 565  
>novel\_mir\_184 Score: 2.5 R03G\_06697  
Query: 1 TTTGACTTTTCTTTAGGG-TG 20  
|||\*|:|\*|

Sbjct: 185 AAATGGAAAAGGAATCCCGAC 165  
>novel\_mir\_184 Score: 2.0 R03G\_04685  
Query: 1 TTTGACTTTTCTTTAGGGTG 20  
\*|:|:|\*|

Sbjct: 1229 TAACTGAAGAGAAATTCCAA 1210  
>novel\_mir\_184 Score: 2.0 R03G\_04999  
Query: 1 TTTGACTTTTCTTTAGGGTG 20  
|||||:|\*|

Sbjct: 2021 AAAGTGAAGAAATCT-GT 2003  
>novel\_mir\_184 Score: 2.5 R03G\_05305  
Query: 1 TTTGACTTTTCTTTAGGG-TG 20  
|||:|:|\*|

Sbjct: 101 AAATTGAAAAGAAATTTTCGAC 81

>novel\_mir\_184 Score: 2.5 R03G\_00730  
Query: 1 TTTGACTTTTCTTTAGGGTG 20  
||||\*||||||\*||||:|:  
Sbjct: 635 AAACGGAAAAGACATCCTAT 616  
>novel\_mir\_149 Score: 2.0 R03G\_13221  
Query: 1 TCGATGCTTTGCTGGTTGCT 20  
||||:|||||||\*  
Sbjct: 1209 AGCTATCAAACGACCAACGT 1190  
>novel\_mir\_149 Score: 2.0 R03G\_13224  
Query: 1 TCGATGCTTTGCTGGTTGCT 20  
||||:|||||||\*  
Sbjct: 1209 AGCTATCAAACGACCAACGT 1190  
>novel\_mir\_149 Score: 2.5 R03G\_10430  
Query: 1 TCGATGCTTTGCTGGTTGCT 20  
|\*::|||||||\*||  
Sbjct: 807 ACTTATGAAACGACCAAAGA 788  
>novel\_mir\_149 Score: 2.5 R03G\_07205  
Query: 1 TCGATGCTTTGCTGGTTGCT 20  
||||\*||:|||||:|\*||  
Sbjct: 871 AGCTTCGGAACGACTAA-GA 853  
>novel\_mir\_149 Score: 2.5 R03G\_07373  
Query: 1 TCGATGCTTTGCTGGTTGCT 20  
\*|:|||||||::|\*||  
Sbjct: 1158 CGTTACGAAACGATTAA-GA 1140  
>novel\_mir\_149 Score: 2.2 R03G\_06084  
Query: 1 TCGATGCTTTGCTGGTTGCT 20  
\*|\*|||||||:|\*|  
Sbjct: 623 TGGTACGAAACGACCAAT-A 605  
>novel\_mir\_149 Score: 2.5 R03G\_04440  
Query: 1 TCGATGCTTTGCTGGTTGCT 20  
||||||\*|::|||||\*||  
Sbjct: 633 AGCTACGCAGTGACCAA-GA 615  
>novel\_mir\_149 Score: 0.0 R03G\_03696  
Query: 1 TCGATGCTTTGCTGGTTGCT 20  
|||||||  
Sbjct: 32 AGCTACGAAACGACCAACGA 13  
>novel\_mir\_149 Score: 2.0 R03G\_04120  
Query: 1 TCGATGCTTTGCTGGTTGCT 20  
||||:|||||||\*  
Sbjct: 1209 AGCTATCAAACGACCAACGT 1190  
>novel\_mir\_149 Score: 2.0 R03G\_04123  
Query: 1 TCGATGCTTTGCTGGTTGCT 20  
||||:|||||||\*  
Sbjct: 1209 AGCTATCAAACGACCAACGT 1190  
>novel\_mir\_149 Score: 2.0 R03G\_04203

Query: 1 TCGATGCTTTGCTGGTTGCT 20  
|||||:\*|||||\*  
Sbjct: 153 AGCTATCAAACGACCAACGT 134  
>novel\_mir\_149 Score: 2.5 R03G\_00772  
Query: 1 TCGATGCTTTGCTGGTTGCT 20  
|||||:||||:\*||\*  
Sbjct: 1729 AGCTACGAAATGACCGTCGC 1710  
>novel\_mir\_133 Score: 1.5 R03G\_17019  
Query: 1 TAAACTGATAGAGCTATACTGG 22  
|||||:|||||\*  
Sbjct: 87 ATTTGACTGCCTCGATATGACC 66  
>novel\_mir\_133 Score: 0.5 R03G\_13853  
Query: 1 TAAACTGATAGAGCTATACTGG 22  
|||||:|||||\*  
Sbjct: 3767 ATTTGACTGTCTCGATATGACC 3746  
>novel\_mir\_133 Score: 1.0 R03G\_12653  
Query: 1 TAAACTGATAGAGCTATACTGG 22  
|||||:|||||\*|  
Sbjct: 324 ATTTGACTGTCTCGATATGAAC 303  
>novel\_mir\_133 Score: 0.5 R03G\_07868  
Query: 1 TAAACTGATAGAGCTATACTGG 22  
|||||:|||||\*|  
Sbjct: 540 ATTTGACTGTCTCGATATGACC 519  
>novel\_mir\_133 Score: 1.0 R03G\_06415  
Query: 1 TAAACTGATAGAGCTATACTGG 22  
|||||:|||||\*|  
Sbjct: 450 ATTTGACTGTCTCGATATGAAC 429  
>novel\_mir\_133 Score: 0.8 R03G\_03114  
Query: 1 TAAACTGATAGAGCTATACTGG 22  
|||||:|||||\*|  
Sbjct: 552 ATTTGACTGTCTCGATATGACT 531  
>novel\_mir\_163 Score: 0.0 R03G\_07525  
Query: 1 TTGAAAACGGGAGACAGCATGG 22  
|||||:|||||\*|\*|:||||  
Sbjct: 1154 AACTTTTGCCCTCTGTCGTACC 1133  
>novel\_mir\_163 Score: 2.5 R03G\_06488  
Query: 1 TTGAAAACGGGAGACAGCATGG 22  
|||||\*||\*|:||||  
Sbjct: 1154 AACTTTTGCCCCCTATTGTACC 1133  
>novel\_mir\_198 Score: 2.5 R03G\_14663  
Query: 1 TGGGAGAGGGGAGGAGGGGG 20  
:|||||:||\*|:|||:  
Sbjct: 787 GCCCTCTCCCTTCATTCCCT 768  
>novel\_mir\_198 Score: 2.2 R03G\_13671  
Query: 1 TGGGAGAGGGGAGGAGGGGG 20

|||:||||:|:||||:|  
Sbjct: 1521 ACCTTCTCTTCTTCTCCTCC 1502  
>novel\_mir\_198 Score: 2.5 R03G\_08433  
Query: 1 TGGGAGAGGGGAGGAGGGGG 20  
::||||:||||||\*|||:  
Sbjct: 694 GTCCTCTTCCCTCCTACCCT 675  
>novel\_mir\_198 Score: 2.5 R03G\_08882  
Query: 1 TGGGAGAGGGGAGGAGGGG-G 20  
||:|:|:|||||||:|\*|  
Sbjct: 2482 ACTTTCTTCCCTCCTCTCCAC 2462  
>novel\_mir\_198 Score: 2.5 R03G\_04192  
Query: 1 TGGGAGAGGGGAGGAGGGGG 20  
\*|||\*|||:||||:|||||  
Sbjct: 3824 TCCCACTCTCCTCTTCCCCC 3805  
>novel\_mir\_198 Score: 2.2 R03G\_01175  
Query: 1 TGGGAGAGGGGAGGAGGGGG 20  
|||:|:|:|||||:|||||:  
Sbjct: 1136 ACCTTTTTCCCTCTTCCCCT 1117  
>novel\_mir\_198 Score: 2.2 R03G\_02107  
Query: 1 TGGGAGAGGGGAGGAGGGGG 20  
||\*|||\*|||||||:|  
Sbjct: 584 AACTCCCCCTCCTCCTCC 565  
>novel\_mir\_130 Score: 2.5 R03G\_01455  
Query: 1 TTATTTGACTGGCCAATGACAA 22  
:|:||||\*|||||:|:|  
Sbjct: 595 GATGAACTGCCCGTTGTTGTT 574  
>novel\_mir\_191 Score: 2.2 R03G\_14594  
Query: 1 TGGGTGCTTGGGAGAGCAAGGT 22  
:|||||||:|:|\*|||  
Sbjct: 31 GCCCACGAACTCTTTCATTCCA 10  
>novel\_mir\_191 Score: 1.0 R03G\_14109  
Query: 1 TGGGTGCTTGGGAGAGCAAGGT 22  
|||||||\*|||  
Sbjct: 79 ACCCACGAACCCTCTCATTCCA 58  
>novel\_mir\_191 Score: 0.8 R03G\_11276  
Query: 1 TGGGTGCTTGGGAGAGCAAGGT 22  
|:|||||||:|  
Sbjct: 265 ATCCACGAACCCTCTCGTTCTA 244  
>novel\_mir\_191 Score: 0.0 R03G\_04428  
Query: 1 TGGGTGCTTGGGAGAGCAAGGT 22  
|||||||\*|||  
Sbjct: 1546 ACCCACGAACCCTCTCGTTCCA 1525  
>novel\_mir\_191 Score: 0.5 R03G\_01147  
Query: 1 TGGGTGCTTGGGAGAGCAAGGT 22  
|||||||:|||||



Sbjct: 226 ACCCACGAACCCTTTCGTTCCA 205  
>novel\_mir\_191 Score: 0.5 R03G\_01161  
Query: 1 TGGGTGCTTGGGAGAGCAAGGT 22  
|||||||||||:|||||||  
Sbjct: 226 ACCCACGAACCCTTTCGTTCCA 205  
>novel\_mir\_146 Score: 0.0 R03G\_02321  
Query: 1 TGACACAATAGGCCTCGATCAA 22  
|||||||||||:|||||||  
Sbjct: 2689 ACTGTGTTATCCGGAGCTAGTT 2668  
>novel\_mir\_136 Score: 2.2 R03G\_13822  
Query: 1 TTGATATGTGCTATGTTGGTCA 22  
|||||||||||:|\*|||:|\*|  
Sbjct: 1113 AACTATACACGGTCCAATTATT 1092  
>novel\_mir\_136 Score: 2.5 R03G\_08677  
Query: 1 TTGATATGTGCTATGTTGGTCA 22  
|||||||:|:|:||||\*|\*||  
Sbjct: 1658 AACTATATATGGTACAAAC-GT 1638  
>novel\_mir\_169 Score: 2.0 R03G\_06738  
Query: 1 TGCTTAAACGGCTGTCAG-AGGA 22  
|||:|||||:|||:||\*|||  
Sbjct: 550 ACGGATTTGCTGACGGTCTTCCT 528  
>novel\_mir\_169 Score: 2.5 R03G\_17349  
Query: 1 TGCTTAAACGGCTGTCAGAGGA 22  
|||\*|||\*|:|||||||||  
Sbjct: 547 ACGTATTTACTGACAGTCTCCT 526  
>novel\_mir\_158 Score: 0.0 R03G\_16694  
Query: 1 TACACAGGATTTAGTGAACCAG 22  
|||||||||||:|||||||  
Sbjct: 122 ATGTGTCCTAAATCACTTGGTC 101  
>novel\_mir\_158 Score: 1.0 R03G\_15671  
Query: 1 TACACAGGATTTAGTGAACCAG 22  
|||||||\*|\*|||\*|||\*|||  
Sbjct: 4286 ATGTGTCCCAAATCACTTGGTC 4265  
>novel\_mir\_158 Score: 1.0 R03G\_15169  
Query: 1 TACACAGGATTTAGTGAACCAG 22  
|||||||\*|\*|||\*|||\*|||  
Sbjct: 4283 ATGTGTCCCAAATCACTTGGTC 4262  
>novel\_mir\_158 Score: 1.0 R03G\_11965  
Query: 1 TACACAGGATTTAGTGAACCAG 22  
|||||||\*|\*|||\*|||\*|||  
Sbjct: 4283 ATGTGTCCCAAATCACTTGGTC 4262  
>novel\_mir\_158 Score: 0.0 R03G\_10873  
Query: 1 TACACAGGATTTAGTGAACCAG 22  
|||||||||||:|||||||  
Sbjct: 4214 ATGTGTCCTAAATCACTTGGTC 4193

>novel\_mir\_158 Score: 1.0 R03G\_07740  
Query: 1 TACACAGGATTTAGTGAACCAG 22  
|||||||\*|||||||  
Sbjct: 4058 ATGTGTCCCAAATCACTTGGTC 4037  
>novel\_mir\_158 Score: 0.0 R03G\_05410  
Query: 1 TACACAGGATTTAGTGAACCAG 22  
|||||||  
Sbjct: 1859 ATGTGTCTAAATCACTTGGTC 1838  
>novel\_mir\_158 Score: 2.2 R03G\_04137  
Query: 1 TACACAGGATTTAGTGAACCAG 22  
|||||||:|:||||\*\*|:  
Sbjct: 612 ATGTGTCTAAGTACTT-TTT 592  
>novel\_mir\_158 Score: 1.0 R03G\_01208  
Query: 1 TACACAGGATTTAGTGAACCAG 22  
|||||||\*|||||||  
Sbjct: 3899 ATGTGTCCCAAATCACTTGGTC 3878  
>novel\_mir\_145 Score: 2.5 R03G\_10900  
Query: 1 TTCGTGCGCTGTCCCAGGAAAT 22  
|||||||\*||||\*|:||||  
Sbjct: 249 AAGCACGCAACAGGATTCTTTA 228  
>novel\_mir\_145 Score: 0.0 R03G\_02282  
Query: 1 TTCGTGCGCTGTCCCAGGAAAT 22  
|||||||  
Sbjct: 156 AAGCACGCGACAGGGTCCTTTA 135  
>novel\_mir\_170 Score: 0.5 R03G\_14569  
Query: 1 TGACAGTACAAGCTAGGAACAG 22  
||||:|||||||  
Sbjct: 112 ACTGTTATGTTTCGATCCTTGTC 91  
>novel\_mir\_170 Score: 0.5 R03G\_12645  
Query: 1 TGACAGTACAAGCTAGGAACAG 22  
||||:|||||||  
Sbjct: 46 ACTGTTATGTTTCGATCCTTGTC 25  
>novel\_mir\_170 Score: 0.5 R03G\_08104  
Query: 1 TGACAGTACAAGCTAGGAACAG 22  
||||:|||||||  
Sbjct: 146 ACTGTTATGTTTCGATCCTTGTC 125  
>novel\_mir\_201 Score: 0.5 R03G\_17236  
Query: 1 TAACCGATAAGCTTAGTGAAGAG 23  
|||||||\*||||  
Sbjct: 491 ATTGGCTATTCTGAATCACCTCTC 469  
>novel\_mir\_201 Score: 0.0 R03G\_16407  
Query: 1 TAACCGATAAGCTTAGTGAAGAG 23  
|||||||  
Sbjct: 359 ATTGGCTATTCTGAATCACTTCTC 337  
>novel\_mir\_201 Score: 1.5 R03G\_13684

Query: 1 TAACCGATAAGCTTAGTGAAGAG 23  
|||||||\*|||\*|||  
Sbjct: 357 ATTGGCTATTCGACTCACCTCTC 335  
>novel\_mir\_201 Score: 0.5 R03G\_08057  
Query: 1 TAACCGATAAGCTTAGTGAAGAG 23  
|||||||\*|||  
Sbjct: 323 ATTGGCTATTCGAATCACCTCTC 301  
>novel\_mir\_201 Score: 0.5 R03G\_07139  
Query: 1 TAACCGATAAGCTTAGTGAAGAG 23  
|||||||\*|||  
Sbjct: 323 ATTGGCTATTCGAATCACCTCTC 301  
>novel\_mir\_138 Score: 0.2 R03G\_09665  
Query: 1 TACCACATTTTCAGCCTTCGC 21  
|||||||:|  
Sbjct: 315 ATGGTGAAAAGTCGGAAGTG 295  
>novel\_mir\_138 Score: 1.0 R03G\_00131  
Query: 1 TACCACATTTTCAGCCTTCGC 21  
||\*|||||||  
Sbjct: 498 ATCGTGAAAAGTCGGAAGCG 478  
>novel\_mir\_138 Score: 2.2 R03G\_00816  
Query: 1 TACCACATTTTCAGCCTTCGC 21  
|||||||\*||:\*\*|  
Sbjct: 633 ATGGTGAAAAGTCTGAGAAG 613  
>novel\_mir\_181 Score: 0.0 R03G\_16700  
Query: 1 TGGCGCTTTTCTTTTGCAATT 21  
|||||||  
Sbjct: 285 ACCGCGAAAAGAAAACGTTAA 265  
>novel\_mir\_181 Score: 2.2 R03G\_14672  
Query: 1 TGGCGCTTTTCTTTTGCAATT 21  
\*|:|:|||||||:|\*  
Sbjct: 1211 CCTGTGAAAAGAAAACGTTGT 1191  
>novel\_mir\_181 Score: 0.5 R03G\_13419  
Query: 1 TGGCGCTTTTCTTTTGCAATT 21  
|||||||\*|||  
Sbjct: 132 ACCGCGAAAAGAAAACGCTAA 112  
>novel\_mir\_181 Score: 2.5 R03G\_13839  
Query: 1 TGGCGCTTTTCTTTTGCAATT 21  
||\*|||:|:|\*|||  
Sbjct: 195 ACCACGAAAGGAAAATGCTAA 175  
>novel\_mir\_181 Score: 2.0 R03G\_12248  
Query: 1 TGGCGCTTTTCTTTTGCAATT 21  
||:|||||||:||\*|||  
Sbjct: 1931 ACTGCGAAAAGAAGACG-CAA 1912  
>novel\_mir\_181 Score: 2.0 R03G\_11121  
Query: 1 TGGCGCTTTTCTTTTGCAATT 21

|||\*|||||||:|\*|||  
Sbjct: 428 ACCACGAAAAGAAAATGCTAA 408  
>novel\_mir\_181 Score: 1.0 R03G\_11349  
Query: 1 TGGCGCTTTTCTTTTGCAATT 21  
\*|||||||\*|||  
Sbjct: 195 TCCGCGAAAAGAAAACGCTAA 175  
>novel\_mir\_181 Score: 2.5 R03G\_09816  
Query: 1 TGGCGCTTTTCTTTTGCAATT 21  
\*||\*|||||||\*|||  
Sbjct: 741 CCCACGAAAAGAAAACGCCAA 721  
>novel\_mir\_181 Score: 2.5 R03G\_06918  
Query: 1 TGGCGCTTTTCTTTTGCAATT 21  
|||\*|||||||\*||\*|  
Sbjct: 35 ACCGGGAAAAGAAAACCTTTCA 15  
>novel\_mir\_181 Score: 2.0 R03G\_06134  
Query: 1 TGGCGCTTTTCTTTTGCAATT 21  
|||||||\*|||:|||\*|||  
Sbjct: 764 ACCGCGAAACGAAGACGCTAA 744  
>novel\_mir\_181 Score: 1.5 R03G\_04258  
Query: 1 TGGCGCTTTTCTTTTGCAATT 21  
|||||\*|||||||\*|||  
Sbjct: 2348 ACCGCGTAAAGAAAACGTAAA 2328  
>novel\_mir\_181 Score: 1.5 R03G\_04568  
Query: 1 TGGCGCTTTTCTTTTGCAATT 21  
|||||||\*|||||||\*|||  
Sbjct: 711 ACCGCGAAAAGAAAACACTAA 691  
>novel\_mir\_181 Score: 2.0 R03G\_00164  
Query: 1 TGGCGCTTTTCTTTTGCAATT 21  
|||||\*|||||||:|||||\*  
Sbjct: 1445 ACCGCTAAAAGAAGACGTTAT 1425  
>novel\_mir\_147 Score: 2.2 R03G\_00859  
Query: 1 TGAGCTAGATCCAAGGTAGG-AC 22  
|||||\*|||||||:|:|\*||  
Sbjct: 1178 ACTCGAACTAGGTTCCGTTTCGTG 1156  
>novel\_mir\_187 Score: 2.0 R03G\_08532  
Query: 1 TGACGTAGTTTGGAGGCTGAGG 22  
|||||:|||||||:||||\*||\*||  
Sbjct: 1708 ACTGCGTCAAACCTCCG-CACC 1688

Supplemental Table 6: CDC-8219 Novel miRNA Targets (TF)

```
#miRNA mRNA Score Match_pos Strand Pairing target and miRNA
query=novel_mir_128, target=R03G_17255, score=0, range=1822-1843, strand=1
target 5' CCUCUGAAGUGUGCGGUGCUCA 3'
::::::::::::::::::::::::::
query 3' GGAGACUUCACACGCCACGAGU 5'
query=novel_mir_128, target=R03G_11979, score=0, range=1825-1846, strand=1
target 5' CCUCUGAAGUGUGCGGUGCUCA 3'
::::::::::::::::::::::::::
query 3' GGAGACUUCACACGCCACGAGU 5'
query=novel_mir_128, target=R03G_13448, score=0, range=1837-1858, strand=1
target 5' CCUCUGAAGUGUGCGGUGCUCA 3'
::::::::::::::::::::::::::
query 3' GGAGACUUCACACGCCACGAGU 5'
query=novel_mir_128, target=R03G_01294, score=0, range=940-961, strand=1
target 5' CCUCUGAAGUGUGCGGUGCUCA 3'
::::::::::::::::::::::::::
query 3' GGAGACUUCACACGCCACGAGU 5'
query=novel_mir_128, target=R03G_17156, score=0, range=124-145, strand=1
target 5' CCUCUGAAGUGUGCGGUGCUCA 3'
::::::::::::::::::::::::::
query 3' GGAGACUUCACACGCCACGAGU 5'
query=novel_mir_128, target=R03G_07735, score=1, range=1771-1792, strand=1
target 5' CCUCUAAAGUGUGCGGUGCUCA 3'
::::: ::::::::::::::::::::
query 3' GGAGACUUCACACGCCACGAGU 5'
query=novel_mir_128, target=R03G_10543, score=1, range=1324-1345, strand=1
target 5' CCUCUAAAGUGUGCGGUGCUCA 3'
::::: ::::::::::::::::::::
query 3' GGAGACUUCACACGCCACGAGU 5'
query=novel_mir_39, target=R03G_19037, score=0, range=1-22, strand=1
target 5' CUCACCACUAUACUACCGAAGA 3'
::::::::::::::::::::::::::
query 3' GAGUGGUGAUAUGAUGGCUUCU 5'
query=novel_mir_39, target=R03G_19036, score=0, range=1-22, strand=1
target 5' CUCACCACUAUACUACCGAAGA 3'
::::::::::::::::::::::::::
```

query 3' GAGUGGUGAUAUGAUGGCUUCU 5'  
query=novel\_mir\_39, target=R03G\_19016, score=0, range=1-22, stran  
target 5' CUCACCACUAUACUACCGAAGA 3'  
.....  
query 3' GAGUGGUGAUAUGAUGGCUUCU 5'  
query=novel\_mir\_39, target=R03G\_19102, score=0, range=1-22, stran  
target 5' CUCACCACUAUACUACCGAAGA 3'  
.....  
query 3' GAGUGGUGAUAUGAUGGCUUCU 5'  
query=novel\_mir\_39, target=R03G\_19063, score=0, range=1-22, stran  
target 5' CUCACCACUAUACUACCGAAGA 3'  
.....  
query 3' GAGUGGUGAUAUGAUGGCUUCU 5'  
query=novel\_mir\_39, target=R03G\_19060, score=0, range=1-22, stran  
target 5' CUCACCACUAUACUACCGAAGA 3'  
.....  
query 3' GAGUGGUGAUAUGAUGGCUUCU 5'  
query=novel\_mir\_39, target=R03G\_19160, score=0, range=1-22, stran  
target 5' CUCACCACUAUACUACCGAAGA 3'  
.....  
query 3' GAGUGGUGAUAUGAUGGCUUCU 5'  
query=novel\_mir\_39, target=R03G\_19242, score=0, range=1-22, stran  
target 5' CUCACCACUAUACUACCGAAGA 3'  
.....  
query 3' GAGUGGUGAUAUGAUGGCUUCU 5'  
query=novel\_mir\_39, target=R03G\_19071, score=0, range=1-22, stran  
target 5' CUCACCACUAUACUACCGAAGA 3'  
.....  
query 3' GAGUGGUGAUAUGAUGGCUUCU 5'  
query=novel\_mir\_39, target=R03G\_19061, score=0, range=1-22, stran  
target 5' CUCACCACUAUACUACCGAAGA 3'  
.....  
query 3' GAGUGGUGAUAUGAUGGCUUCU 5'  
query=novel\_mir\_39, target=R03G\_19117, score=0.5, range=1-22,  
strand=-1  
target 5' CUUACCACUAUACUACCGAAGA 3'  
.....  
query 3' GAGUGGUGAUAUGAUGGCUUCU 5'  
query=novel\_mir\_39, target=R03G\_19213, score=0.5, range=1-22,  
strand=-1  
target 5' CUUACCACUAUACUACCGAAGA 3'  
.....  
query 3' GAGUGGUGAUAUGAUGGCUUCU 5'  
query=novel\_mir\_39, target=R03G\_17289, score=4, range=1692-1712,  
strand=1

```

target 5' CUCACC-CUAUGGUACCGAAGA 3'
:::::: ::::: :::::::::::
query 3' GAGUGGUGAUAUGAUGGCUUCU 5'
query=novel_mir_39, target=R03G_10860, score=4, range=1692-1712,
strand=1
target 5' CUCACC-CUAUGGUACCGAAGA 3'
:::::: ::::: :::::::::::
query 3' GAGUGGUGAUAUGAUGGCUUCU 5'
query=novel_mir_39, target=R03G_13144, score=4, range=1662-1682,
strand=1
target 5' CUCACC-CUAUGGUACCGAAGA 3'
:::::: ::::: :::::::::::
query 3' GAGUGGUGAUAUGAUGGCUUCU 5'
query=novel_mir_39, target=R03G_05353, score=4, range=1662-1682,
strand=1
target 5' CUCACC-CUAUGGUACCGAAGA 3'
:::::: ::::: :::::::::::
query 3' GAGUGGUGAUAUGAUGGCUUCU 5'
query=novel_mir_39, target=R03G_16752, score=4, range=1662-1682,
strand=1
target 5' CUCACC-CUAUGGUACCGAAGA 3'
:::::: ::::: :::::::::::
query 3' GAGUGGUGAUAUGAUGGCUUCU 5'
query=novel_mir_39, target=R03G_16915, score=4, range=1461-1481,
strand=1
target 5' CUCACC-CUAUGGUACCGAAGA 3'
:::::: ::::: :::::::::::
query 3' GAGUGGUGAUAUGAUGGCUUCU 5'
query=novel_mir_39, target=R03G_17018, score=4, range=1461-1481,
strand=1
target 5' CUCACC-CUAUGGUACCGAAGA 3'
:::::: ::::: :::::::::::
query 3' GAGUGGUGAUAUGAUGGCUUCU 5'
query=novel_mir_39, target=R03G_07105, score=4, range=180-200,
strand=1
target 5' CUCACC-CUAUGGUACCGAAGA 3'
:::::: ::::: :::::::::::
query 3' GAGUGGUGAUAUGAUGGCUUCU 5'
query=novel_mir_39, target=R03G_15289, score=4, range=180-200,
strand=1
target 5' CUCACC-CUAUGGUACCGAAGA 3'
:::::: ::::: :::::::::::
query 3' GAGUGGUGAUAUGAUGGCUUCU 5'
query=novel_mir_39, target=R03G_13915, score=4, range=132-152,
strand=1

```







query 3' UGGUUGAGCCGGUAGGGAGG 5'  
query=novel\_mir\_33, target=R03G\_05888, score=4, range=970-989,  
strand=1  
target 5' ACCUCUUGGCCAUCCUCC 3'  
::: :::::::::::::::  
query 3' UGGUUGAGCCGGUAGGGAGG 5'  
query=novel\_mir\_79, target=R03G\_09718, score=0, range=336-357,  
strand=1  
target 5' AGCCAGUUCUCCCAUAUUGUCA 3'  
:::::::::::::::::::::  
query 3' UCGGUCAAGAGGGUAUAACAGU 5'  
query=novel\_mir\_79, target=R03G\_12007, score=0, range=336-357,  
strand=1  
target 5' AGCCAGUUCUCCCAUAUUGUCA 3'  
:::::::::::::::::::::  
query 3' UCGGUCAAGAGGGUAUAACAGU 5'  
query=novel\_mir\_79, target=R03G\_13293, score=0, range=336-357,  
strand=1  
target 5' AGCCAGUUCUCCCAUAUUGUCA 3'  
:::::::::::::::::::::  
query 3' UCGGUCAAGAGGGUAUAACAGU 5'  
query=novel\_mir\_79, target=R03G\_10177, score=0, range=336-357,  
strand=1  
target 5' AGCCAGUUCUCCCAUAUUGUCA 3'  
:::::::::::::::::::::  
query 3' UCGGUCAAGAGGGUAUAACAGU 5'  
query=novel\_mir\_79, target=R03G\_03867, score=0, range=336-357,  
strand=1  
target 5' AGCCAGUUCUCCCAUAUUGUCA 3'  
:::::::::::::::::::::  
query 3' UCGGUCAAGAGGGUAUAACAGU 5'  
query=novel\_mir\_79, target=R03G\_01475, score=0, range=336-357,  
strand=1  
target 5' AGCCAGUUCUCCCAUAUUGUCA 3'  
:::::::::::::::::::::  
query 3' UCGGUCAAGAGGGUAUAACAGU 5'  
query=novel\_mir\_79, target=R03G\_15131, score=0, range=336-357,  
strand=1  
target 5' AGCCAGUUCUCCCAUAUUGUCA 3'  
:::::::::::::::::::::  
query 3' UCGGUCAAGAGGGUAUAACAGU 5'  
query=novel\_mir\_79, target=R03G\_01004, score=0, range=336-357,  
strand=1  
target 5' AGCCAGUUCUCCCAUAUUGUCA 3'  
:::::::::::::::::::::

```

query 3' UCGGUCAAGAGGGUAUAACAGU 5'
query=novel_mir_79, target=R03G_13439, score=0, range=336-357,
strand=1
target 5' AGCCAGUUCUCCCAUAUUGUCA 3'
::::::::::::::::::::::::::
query 3' UCGGUCAAGAGGGUAUAACAGU 5'
query=novel_mir_79, target=R03G_16804, score=0, range=336-357,
strand=1
target 5' AGCCAGUUCUCCCAUAUUGUCA 3'
::::::::::::::::::::::::::
query 3' UCGGUCAAGAGGGUAUAACAGU 5'
query=novel_mir_79, target=R03G_10715, score=0, range=336-357,
strand=1
target 5' AGCCAGUUCUCCCAUAUUGUCA 3'
::::::::::::::::::::::::::
query 3' UCGGUCAAGAGGGUAUAACAGU 5'
query=novel_mir_79, target=R03G_09044, score=0, range=198-219,
strand=1
target 5' AGCCAGUUCUCCCAUAUUGUCA 3'
::::::::::::::::::::::::::
query 3' UCGGUCAAGAGGGUAUAACAGU 5'
query=novel_mir_79, target=R03G_04309, score=2, range=336-357,
strand=1
target 5' AUCCAGUUCUCCCGUAUUGUCA 3'
: ::::::::::::::::::::::::::::
query 3' UCGGUCAAGAGGGUAUAACAGU 5'
query=novel_mir_79, target=R03G_15002, score=3, range=336-357,
strand=1
target 5' AUCCAGUUCUCCCAUAUUGCCA 3'
: ::::::::::::::::::::::::::::
query 3' UCGGUCAAGAGGGUAUAACAGU 5'
query=novel_mir_79, target=R03G_12536, score=3, range=336-357,
strand=1
target 5' AUCCAGUUCUCCCAUAUUGCCA 3'
: ::::::::::::::::::::::::::::
query 3' UCGGUCAAGAGGGUAUAACAGU 5'
query=novel_mir_79, target=R03G_08601, score=3.5, range=47-69,
strand=1
target 5' AGUCAGUGACUCCUAUAUUGUCA 3'
: ::::::::::::::::::::::::::::
query 3' UCGGUCA-AGAGGGUAUAACAGU 5'
query=novel_mir_101, target=R03G_13001, score=0, range=1134-1156,
strand=1
target 5' CUUAUGGUCUCGACAUUGUGGUA 3'
::::::::::::::::::::::::::

```

```
query 3' GAAUACCAGAGCUGUAACACCAU 5'
query=novel_mir_101, target=R03G_06596, score=0, range=1134-1156,
strand=1
target 5' CUUAUGGUCUCGACAUUGUGGUA 3'
::::::::::::::::::::::::::
query 3' GAAUACCAGAGCUGUAACACCAU 5'
query=novel_mir_101, target=R03G_03002, score=0, range=1134-1156,
strand=1
target 5' CUUAUGGUCUCGACAUUGUGGUA 3'
::::::::::::::::::::::::::
query 3' GAAUACCAGAGCUGUAACACCAU 5'
query=novel_mir_101, target=R03G_09843, score=3, range=368-391,
strand=1
target 5' AUUGCUGGUCUCGACAUUGUGGUG 3'
:. ::::::::::::::::::::::.
query 3' GAAU-ACCAGAGCUGUAACACCAU 5'
query=novel_mir_22, target=R03G_04116, score=0, range=152-173,
strand=1
target 5' UGAGGAAAGAAAAUAGGCGCUA 3'
::::::::::::::::::::::::::
query 3' ACUCCUUUCUUUUUUAUCCGCGAU 5'
query=novel_mir_22, target=R03G_02842, score=0, range=2-23, stran
target 5' UGAGGAAAGAAAAUAGGCGCUA 3'
::::::::::::::::::::::::::
query 3' ACUCCUUUCUUUUUUAUCCGCGAU 5'
query=novel_mir_53, target=R03G_01535, score=1, range=219-240,
strand=1
target 5' CGAAAAGAACGUAGCCGAUGCC 3'
::::::::::::::::::::::::::
query 3' GCUUUUCUUGCAUCGGCUACGU 5'
query=novel_mir_53, target=R03G_01538, score=1, range=219-240,
strand=1
target 5' CGAAAAGAACGUAGCCGAUGCC 3'
::::::::::::::::::::::::::
query 3' GCUUUUCUUGCAUCGGCUACGU 5'
query=novel_mir_53, target=R03G_13496, score=1, range=166-187,
strand=1
target 5' CAAAAGAACGUAGCCGAUGCA 3'
: :::::::::::::::::::::::
query 3' GCUUUUCUUGCAUCGGCUACGU 5'
query=novel_mir_53, target=R03G_12846, score=2.5, range=474-495,
strand=1
target 5' UGAAAAGAUUGUAGCCGAUGCA 3'
.:::::::::: .:::::::::::
query 3' GCUUUUCUUGCAUCGGCUACGU 5'
```



query=novel\_mir\_31, target=R03G\_12163, score=2, range=473-494,  
strand=1  
target 5' CUCUUUGCAUGAACCCAGAACA 3'  
:: : :::::::::::::::::::::  
query 3' GAAAUACGUACUUGGGUCUUGU 5'  
query=novel\_mir\_31, target=R03G\_07972, score=3, range=584-605,  
strand=1  
target 5' CAUUGUGUAUGAAUCCAGAACA 3'  
: :::::::::::::::::::::  
query 3' GAAAUACGUACUUGGGUCUUGU 5'  
query=novel\_mir\_31, target=R03G\_04799, score=3.5, range=806-827,  
strand=1  
target 5' UUUUAUACAUGAACCAAGAACA 3'  
.:::::: :::::::::: ::::::::  
query 3' GAAAUACGUACUUGGGUCUUGU 5'  
query=novel\_mir\_119, target=R03G\_19205, score=0, range=1-23, stra  
target 5' UUUAACCAUUACACCACAAGACC 3'  
: :::::::::::::::::::::  
query 3' AAUUGGUAUGUGGUGUUCUGG 5'  
query=novel\_mir\_119, target=R03G\_19204, score=1, range=1-23, stra  
target 5' UUUAACCAUUACACCACAGGACC 3'  
: :::::::::::::::::::::  
query 3' AAUUGGUAUGUGGUGUUCUGG 5'  
query=novel\_mir\_119, target=R03G\_08537, score=3.5, range=384-406,  
strand=1  
target 5' UGUAACUAUUUAUAUCACAAGACC 3'  
: :::::::::::::::::::::  
query 3' AAUUGGUAUGUGGUGUUCUGG 5'  
query=novel\_mir\_119, target=R03G\_16088, score=3.5, range=749-770,  
strand=-1  
target 5' AAUAA-UUUUACACCACAAGACC 3'  
::: .:::::::::::::::::::  
query 3' AAUUGGUAUGUGGUGUUCUGG 5'  
query=novel\_mir\_119, target=R03G\_19051, score=4, range=1-24, stra  
target 5' GCUAACCAUUACAUCACAAGACC 3'  
: :::::::::::::::::::::  
query 3' AAUUGG-UAAUGUGGUGUUCUGG 5'  
query=novel\_mir\_37, target=R03G\_01150, score=0, range=691-712,  
strand=1  
target 5' CCUACCAAAGCCCGAGUCCCA 3'  
: :::::::::::::::::::::  
query 3' GGAUGGUUUCGGGCUCAAGGGU 5'  
query=novel\_mir\_37, target=R03G\_08905, score=0, range=691-712,  
strand=1  
target 5' CCUACCAAAGCCCGAGUCCCA 3'

```
.....
query 3' GGAUGGUUUCGGGCUCAAGGGU 5'
query=novel_mir_37, target=R03G_01159, score=0, range=691-712,
strand=1
target 5' CCUACCAAAGCCCGAGUCCCA 3'
.....
query 3' GGAUGGUUUCGGGCUCAAGGGU 5'
query=novel_mir_37, target=R03G_03720, score=0, range=691-712,
strand=1
target 5' CCUACCAAAGCCCGAGUCCCA 3'
.....
query 3' GGAUGGUUUCGGGCUCAAGGGU 5'
query=novel_mir_37, target=R03G_00795, score=0, range=691-712,
strand=1
target 5' CCUACCAAAGCCCGAGUCCCA 3'
.....
query 3' GGAUGGUUUCGGGCUCAAGGGU 5'
query=novel_mir_37, target=R03G_08300, score=0, range=691-712,
strand=1
target 5' CCUACCAAAGCCCGAGUCCCA 3'
.....
query 3' GGAUGGUUUCGGGCUCAAGGGU 5'
query=novel_mir_37, target=R03G_05951, score=0, range=691-712,
strand=1
target 5' CCUACCAAAGCCCGAGUCCCA 3'
.....
query 3' GGAUGGUUUCGGGCUCAAGGGU 5'
query=novel_mir_37, target=R03G_11834, score=2, range=472-493,
strand=1
target 5' CCUACCAAAGCCCGAGUCCAA 3'
..... :
query 3' GGAUGGUUUCGGGCUCAAGGGU 5'
query=novel_mir_37, target=R03G_04029, score=3.5, range=670-691,
strand=1
target 5' UCUACUAAAGCCCGUGUCCCCG 3'
..... :
query 3' GGAUGGUUUCGGGCUCAAGGGU 5'
query=novel_mir_37, target=R03G_13485, score=3.5, range=505-526,
strand=1
target 5' UCUACUAAAGCCCGUGUCCCCG 3'
..... :
query 3' GGAUGGUUUCGGGCUCAAGGGU 5'
query=novel_mir_37, target=R03G_05620, score=4, range=670-691,
strand=1
target 5' UUUACUAAAGCCCGUGUCCCCG 3'
```

```
.....
query 3' GGAUGGUUUCGGGCUCAAGGGU 5'
query=novel_mir_71, target=R03G_09204, score=2.5, range=448-469,
strand=-1
target 5' CACCUUCUCUUGUCCUCUUGUA 3'
.....
query 3' GUGGGAGAGAACAGGAGAAAAU 5'
query=novel_mir_71, target=R03G_13411, score=4, range=164-184,
strand=1
target 5' AACCCU-UCUUAUCCUCUUUUA 3'
.....
query 3' GUGGGAGAGAACAGGAGAAAAU 5'
query=novel_mir_71, target=R03G_02113, score=4, range=2732-2752,
strand=-1
target 5' CAACCUCUCUUGU-UUCUUUUA 3'
:: .....
query 3' GUGGGAGAGAACAGGAGAAAAU 5'
query=novel_mir_71, target=R03G_12827, score=4, range=136-156,
strand=-1
target 5' CAUUCUCU-UUGUUCUCUUUUU 3'
.....
query 3' GUGGGAGAGAACAGGAGAAAAU 5'
query=novel_mir_70, target=R03G_16319, score=0, range=1912-1933,
strand=1
target 5' CCAAAGCCUUUUAACCCACCA 3'
.....
query 3' GGUUUCGGAAAAGUUGGGUGGU 5'
query=novel_mir_70, target=R03G_12207, score=0, range=1912-1933,
strand=1
target 5' CCAAAGCCUUUUAACCCACCA 3'
.....
query 3' GGUUUCGGAAAAGUUGGGUGGU 5'
query=novel_mir_70, target=R03G_00653, score=0, range=1912-1933,
strand=1
target 5' CCAAAGCCUUUUAACCCACCA 3'
.....
query 3' GGUUUCGGAAAAGUUGGGUGGU 5'
query=novel_mir_70, target=R03G_02944, score=0, range=1231-1252,
strand=1
target 5' CCAAAGCCUUUUAACCCACCA 3'
.....
query 3' GGUUUCGGAAAAGUUGGGUGGU 5'
query=novel_mir_70, target=R03G_07700, score=0, range=1231-1252,
strand=1
target 5' CCAAAGCCUUUUAACCCACCA 3'
```



query 3' GGUUUCGGAAAAGUUGGGUGGU 5'  
query=novel\_mir\_70, target=R03G\_16888, score=0, range=1231-1252,  
strand=1  
target 5' CCAAAGCCUUUUAACCCACCA 3'

query 3' GGUUUCGGAAAAGUUGGGUGGU 5'  
query=novel\_mir\_70, target=R03G\_01241, score=0, range=487-508,  
strand=1  
target 5' CCAAAGCCUUUUAACCCACCA 3'

query 3' GGUUUCGGAAAAGUUGGGUGGU 5'  
query=novel\_mir\_70, target=R03G\_01244, score=0, range=94-115, str  
target 5' CCAAAGCCUUUUAACCCACCA 3'

query 3' GGUUUCGGAAAAGUUGGGUGGU 5'  
query=novel\_mir\_70, target=R03G\_08064, score=0, range=823-844,  
strand=1  
target 5' CCAAAGCCUUUUAACCCACCA 3'

query 3' GGUUUCGGAAAAGUUGGGUGGU 5'  
query=novel\_mir\_70, target=R03G\_17284, score=0, range=91-112, str  
target 5' CCAAAGCCUUUUAACCCACCA 3'

query 3' GGUUUCGGAAAAGUUGGGUGGU 5'  
query=novel\_mir\_70, target=R03G\_11205, score=4, range=1008-1030,  
strand=-1  
target 5' CUAAAUUCUUUUAACACCACCA 3'

query 3' GGUUUCGGAAAAGUUG-GGUGGU 5'  
query=novel\_mir\_41, target=R03G\_08791, score=2, range=57-78, stra  
target 5' AGUACCAGUCAAUUAUCAAGUA 3'

query 3' UUGUAGUCAGUAAUAGUUCAU 5'  
query=novel\_mir\_41, target=R03G\_00481, score=3.5, range=632-653,  
strand=1  
target 5' AGCGUCGAUCAAUUAUCAAGUC 3'

query 3' UUGUAGUCAGUAAUAGUUCAU 5'  
query=novel\_mir\_41, target=R03G\_07585, score=4, range=1201-1221,  
strand=-1  
target 5' AACACCCGUCAAUU-UCAAGUA 3'

query 3' UUGUAGUCAGUAAUAGUUCAU 5'  
query=novel\_mir\_108, target=R03G\_09361, score=2, range=1176-1195,

```

strand=1
target 5' GCGAUCUGACCCGGGCAAUA 3'
::::::::::::::::::
query 3' AACUAGACUGGGCCCGUUAU 5'
query=novel_mir_58, target=R03G_07315, score=0, range=38-59, str
target 5' CCACCAGACCUUGUAAAGUAGA 3'
::::::::::::::::::
query 3' GGUGGUCUGGAACAUUUCAUCU 5'
query=novel_mir_58, target=R03G_09176, score=2.5, range=38-59,
strand=1
target 5' CCACCAGAUCUUAUAAAGUAGA 3'
::::::::::::::::::
query 3' GGUGGUCUGGAACAUUUCAUCU 5'
query=novel_mir_58, target=R03G_10038, score=3.5, range=57-78,
strand=1
target 5' CCACCAGAUCUUGUUAAGUGGA 3'
::::::::::::::::::
query 3' GGUGGUCUGGAACAUUUCAUCU 5'
query=novel_mir_58, target=R03G_17047, score=3.5, range=51-72,
strand=-1
target 5' CCACAAGAUCUUGUUAAGUAGA 3'
:::: ::::::::::::::::::::
query 3' GGUGGUCUGGAACAUUUCAUCU 5'
query=novel_mir_58, target=R03G_11431, score=4, range=924-946,
strand=1
target 5' UCAUCAGACCUUGUCAAGUGGA 3'
.:::::::::: ::::::::::
query 3' GGUGGUCUGGAACA-UUUCAUCU 5'
query=novel_mir_80, target=R03G_08369, score=0, range=159-180,
strand=1
target 5' CAAAGGCAAAGGAAAAGCUACA 3'
::::::::::::::::::
query 3' GUUUCGGUUUCCUUUUCGAUGU 5'
query=novel_mir_80, target=R03G_16160, score=0, range=159-180,
strand=1
target 5' CAAAGGCAAAGGAAAAGCUACA 3'
::::::::::::::::::
query 3' GUUUCGGUUUCCUUUUCGAUGU 5'
query=novel_mir_80, target=R03G_10303, score=0, range=99-120, str
target 5' CAAAGGCAAAGGAAAAGCUACA 3'
::::::::::::::::::
query 3' GUUUCGGUUUCCUUUUCGAUGU 5'
query=novel_mir_80, target=R03G_14219, score=0, range=159-180,
strand=1
target 5' CAAAGGCAAAGGAAAAGCUACA 3'

```

query 3' GUUUCG UUUUCU UUCGAUGU 5'  
query=novel\_mir\_80, target=R03G\_13308, score=1, range=141-162,  
strand=1  
target 5' CAAAGGCAAAGGAAAGGCUACA 3'

query 3' GUUUCG UUUUCU UUCGAUGU 5'  
query=novel\_mir\_80, target=R03G\_03080, score=1, range=72-93, stra  
target 5' CAAAGGCAAAGGAAAAGCUAUA 3'

query 3' GUUUCG UUUUCU UUCGAUGU 5'  
query=novel\_mir\_80, target=R03G\_10665, score=1, range=183-204,  
strand=1  
target 5' CAAAGACAAAGGAAAAGCUACA 3'

query 3' GUUUCG UUUUCU UUCGAUGU 5'  
query=novel\_mir\_80, target=R03G\_03876, score=2, range=159-180,  
strand=1  
target 5' CAAAGACAAAGGAAAAGCUAUA 3'

query 3' GUUUCG UUUUCU UUCGAUGU 5'  
query=novel\_mir\_80, target=R03G\_06787, score=2.5, range=159-180,  
strand=1  
target 5' CAAAGAUAAAGGAAAAGGCUACA 3'

query 3' GUUUCG UUUUCU UUCGAUGU 5'  
query=novel\_mir\_80, target=R03G\_10242, score=3, range=159-180,  
strand=1  
target 5' CAAAGGCAAAGUAAAAGCUAUA 3'

query 3' GUUUCG UUUUCU UUCGAUGU 5'  
query=novel\_mir\_80, target=R03G\_10415, score=3, range=141-162,  
strand=1  
target 5' CAAAGGCAAAGUAAAAGCUAUA 3'

query 3' GUUUCG UUUUCU UUCGAUGU 5'  
query=novel\_mir\_80, target=R03G\_00384, score=4, range=42-63, stra  
target 5' CAAAGGCAAAGAAAAGCUAGA 3'

query 3' GUUUCG UUUUCU UUCGAUGU 5'  
query=novel\_mir\_80, target=R03G\_13466, score=4, range=237-258,  
strand=1  
target 5' CAAUAGCAAAGGAAAGGCUACU 3'

query 3' GUUUCG UUUUCU UUCGAUGU 5'



query=novel\_mir\_78, target=R03G\_02646, score=3.5, range=612-631,  
strand=-1  
target 5' CCAUACGAUCUUUUACGCUG 3'  
: : :::::::::::::::  
query 3' AGAAAGCUAGAAAAUGCGAU 5'  
query=novel\_mir\_78, target=R03G\_12562, score=4, range=796-815,  
strand=-1  
target 5' UCUUCCGUCUUUUACGUUC 3'  
: : : :::::::::::::::  
query 3' AGAAAGCUAGAAAAUGCGAU 5'  
query=novel\_mir\_78, target=R03G\_15401, score=4, range=583-602,  
strand=-1  
target 5' UUAUUUGAUCUUUUACGUUU 3'  
: : : :::::::::::::::  
query 3' AGAAAGCUAGAAAAUGCGAU 5'  
query=novel\_mir\_78, target=R03G\_00113, score=4, range=303-321,  
strand=-1  
target 5' UCCAUC-AUCUUUUUAUGCUA 3'  
: : : :::::::::::::::  
query 3' AGAAAGCUAGAAAAUGCGAU 5'  
query=novel\_mir\_78, target=R03G\_13795, score=4, range=262-280,  
strand=-1  
target 5' GCUUGC-AUCUUUUACGCUU 3'  
: : : :::::::::::::::  
query 3' AGAAAGCUAGAAAAUGCGAU 5'  
query=novel\_mir\_103, target=R03G\_13622, score=0, range=176-195,  
strand=1  
target 5' CCGACCUCCUCUUCGAUACA 3'  
: : : :::::::::::::::  
query 3' GGCUGGAGGAGAAGCUAUGU 5'  
query=novel\_mir\_103, target=R03G\_01932, score=0, range=86-105,  
strand=1  
target 5' CCGACCUCCUCUUCGAUACA 3'  
: : : :::::::::::::::  
query 3' GGCUGGAGGAGAAGCUAUGU 5'  
query=novel\_mir\_103, target=R03G\_15964, score=3, range=41-61, str  
target 5' CGGACCUCCUCUUCGAUACC 3'  
: : : :::::::::::::::  
query 3' GGCU-GGAGGAGAAGCUAUGU 5'  
query=novel\_mir\_103, target=R03G\_14868, score=4, range=18-37,  
strand=-1  
target 5' UGGACUCCUCUUCGGUAUA 3'  
. : : :::::::::::::::  
query 3' GGCUGGAGGAGAAGCUAUGU 5'  
query=novel\_mir\_103, target=R03G\_14880, score=4, range=18-37,

```
strand=-1
target 5' UGGACUCCUCUUCGGUAUA 3'
. :::::::::::::::::::::
query 3' GGCUGGAGGAGAAGCUAUGU 5'
query=novel_mir_64, target=R03G_15271, score=2, range=980-1002,
strand=-1
target 5' CUUUUCUGCUAACACUGCUUGUA 3'
:::::::::::::::::::
query 3' GAAAAGACGAUUCUGACGAACAU 5'
query=novel_mir_64, target=R03G_12663, score=2, range=815-837,
strand=-1
target 5' CUUUUCUGCUAAGACAGCUUGUA 3'
:::::::::::::::::::
query 3' GAAAAGACGAUUCUGACGAACAU 5'
query=novel_mir_64, target=R03G_17355, score=2, range=815-837,
strand=-1
target 5' CUUUUCUGCUAAGACAGCUUGUA 3'
:::::::::::::::::::
query 3' GAAAAGACGAUUCUGACGAACAU 5'
query=novel_mir_64, target=R03G_17223, score=2, range=704-726,
strand=-1
target 5' CUUUUCUGCUAAGACAGCUUGUA 3'
:::::::::::::::::::
query 3' GAAAAGACGAUUCUGACGAACAU 5'
query=novel_mir_64, target=R03G_16706, score=2, range=704-726,
strand=-1
target 5' CUUUUCUGCUAAGACAGCUUGUA 3'
:::::::::::::::::::
query 3' GAAAAGACGAUUCUGACGAACAU 5'
query=novel_mir_64, target=R03G_09193, score=2, range=704-726,
strand=-1
target 5' CUUUUCUGCUAAGACAGCUUGUA 3'
:::::::::::::::::::
query 3' GAAAAGACGAUUCUGACGAACAU 5'
query=novel_mir_64, target=R03G_04674, score=3.5, range=731-753,
strand=-1
target 5' CUUCUUUGCUAAGACUGCUUGCA 3'
::: :::::::::::::::::::::
query 3' GAAAAGACGAUUCUGACGAACAU 5'
query=novel_mir_113, target=R03G_05904, score=0, range=277-298,
strand=1
target 5' UUGACUUAUAACACCACCCUAA 3'
:::::::::::::::::::
query 3' AACUGAAUAUUGUGGUGGGAUU 5'
query=novel_mir_113, target=R03G_12177, score=0, range=277-298,
```

strand=1  
target 5' UUGACUUAUAACACCACCCUAA 3'  
::::::::::::::::::::::::::  
query 3' AACUGAAUAUUGUGGGGAUU 5'  
query=novel\_mir\_113, target=R03G\_11267, score=0, range=277-298,  
strand=1  
target 5' UUGACUUAUAACACCACCCUAA 3'  
::::::::::::::::::::::::::  
query 3' AACUGAAUAUUGUGGGGAUU 5'  
query=novel\_mir\_113, target=R03G\_08653, score=0, range=277-298,  
strand=1  
target 5' UUGACUUAUAACACCACCCUAA 3'  
::::::::::::::::::::::::::  
query 3' AACUGAAUAUUGUGGGGAUU 5'  
query=novel\_mir\_113, target=R03G\_16699, score=0, range=277-298,  
strand=1  
target 5' UUGACUUAUAACACCACCCUAA 3'  
::::::::::::::::::::::::::  
query 3' AACUGAAUAUUGUGGGGAUU 5'  
query=novel\_mir\_113, target=R03G\_10549, score=0, range=277-298,  
strand=1  
target 5' UUGACUUAUAACACCACCCUAA 3'  
::::::::::::::::::::::::::  
query 3' AACUGAAUAUUGUGGGGAUU 5'  
query=novel\_mir\_113, target=R03G\_01305, score=0, range=277-298,  
strand=1  
target 5' UUGACUUAUAACACCACCCUAA 3'  
::::::::::::::::::::::::::  
query 3' AACUGAAUAUUGUGGGGAUU 5'  
query=novel\_mir\_113, target=R03G\_07995, score=0, range=277-298,  
strand=1  
target 5' UUGACUUAUAACACCACCCUAA 3'  
::::::::::::::::::::::::::  
query 3' AACUGAAUAUUGUGGGGAUU 5'  
query=novel\_mir\_113, target=R03G\_05638, score=0, range=277-298,  
strand=1  
target 5' UUGACUUAUAACACCACCCUAA 3'  
::::::::::::::::::::::::::  
query 3' AACUGAAUAUUGUGGGGAUU 5'  
query=novel\_mir\_113, target=R03G\_13770, score=0, range=277-298,  
strand=1  
target 5' UUGACUUAUAACACCACCCUAA 3'  
::::::::::::::::::::::::::  
query 3' AACUGAAUAUUGUGGGGAUU 5'  
query=novel\_mir\_113, target=R03G\_01700, score=0, range=331-352,

strand=1  
target 5' UUGACUUAUAACACCACCCUAA 3'  
::::::::::::::::::::::::::  
query 3' AACUGAAUAUUGUGGUGGGAAU 5'  
query=novel\_mir\_113, target=R03G\_09959, score=0, range=277-298,  
strand=1  
target 5' UUGACUUAUAACACCACCCUAA 3'  
::::::::::::::::::::::::::  
query 3' AACUGAAUAUUGUGGUGGGAAU 5'  
query=novel\_mir\_113, target=R03G\_14564, score=0, range=277-298,  
strand=1  
target 5' UUGACUUAUAACACCACCCUAA 3'  
::::::::::::::::::::::::::  
query 3' AACUGAAUAUUGUGGUGGGAAU 5'  
query=novel\_mir\_113, target=R03G\_06413, score=0, range=70-91, str  
target 5' UUGACUUAUAACACCACCCUAA 3'  
::::::::::::::::::::::::::  
query 3' AACUGAAUAUUGUGGUGGGAAU 5'  
query=novel\_mir\_113, target=R03G\_11280, score=0.5, range=277-298,  
strand=1  
target 5' UUGACUUAUAACACCACCCUAG 3'  
::::::::::::::::::::::::::  
query 3' AACUGAAUAUUGUGGUGGGAAU 5'  
query=novel\_mir\_113, target=R03G\_16426, score=2, range=277-298,  
strand=1  
target 5' UUGACUUACAACACUACCCUAA 3'  
:::::::::: ::::::::::::::::::::  
query 3' AACUGAAUAUUGUGGUGGGAAU 5'  
query=novel\_mir\_113, target=R03G\_03936, score=2, range=277-298,  
strand=1  
target 5' UUGACUUACAACACUACCCUAA 3'  
:::::::::: ::::::::::::::::::::  
query 3' AACUGAAUAUUGUGGUGGGAAU 5'  
query=novel\_mir\_127, target=R03G\_14100, score=4, range=424-445,  
strand=1  
target 5' GGUGUUUGCUACUUAUCACGCA 3'  
:::: :::::::::::::::::::: ::::  
query 3' CCACCAGUGAUGAAUAGUUCGU 5'  
query=novel\_mir\_102, target=R03G\_12521, score=0, range=577-598,  
strand=1  
target 5' CCUGCUAAGAUACAACGUAAUUA 3'  
::::::::::::::::::::::::::  
query 3' GGACGAUUCUAUGUUGCAUAAU 5'  
query=novel\_mir\_102, target=R03G\_00798, score=0, range=577-598,  
strand=1







target 5' AAAGCAAAUAGAAACGAAAAGA 3'  
:::~::~:  
query 3' UUUCGUUUUAUCUUUGCUUUUCU 5'  
query=novel\_mir\_43, target=R03G\_01329, score=0, range=234-255,  
strand=1  
target 5' AAAGCAAAUAGAAACGAAAAGA 3'  
:::~::~:  
query 3' UUUCGUUUUAUCUUUGCUUUUCU 5'  
query=novel\_mir\_43, target=R03G\_06442, score=0.5, range=2043-2064  
strand=1  
target 5' AAGGCAAAUAGAAACGAAAAGA 3'  
:::~::~:  
query 3' UUUCGUUUUAUCUUUGCUUUUCU 5'  
query=novel\_mir\_43, target=R03G\_02691, score=0.5, range=4875-4896  
strand=1  
target 5' AAGGCAAAUAGAAACGAAAAGA 3'  
:::~::~:  
query 3' UUUCGUUUUAUCUUUGCUUUUCU 5'  
query=novel\_mir\_43, target=R03G\_09965, score=0.5, range=1386-1407  
strand=1  
target 5' AAGGCAAAUAGAAACGAAAAGA 3'  
:::~::~:  
query 3' UUUCGUUUUAUCUUUGCUUUUCU 5'  
query=novel\_mir\_43, target=R03G\_13920, score=0.5, range=1386-1407  
strand=1  
target 5' AAGGCAAAUAGAAACGAAAAGA 3'  
:::~::~:  
query 3' UUUCGUUUUAUCUUUGCUUUUCU 5'  
query=novel\_mir\_43, target=R03G\_03547, score=0.5, range=1386-1407  
strand=1  
target 5' AAGGCAAAUAGAAACGAAAAGA 3'  
:::~::~:  
query 3' UUUCGUUUUAUCUUUGCUUUUCU 5'  
query=novel\_mir\_43, target=R03G\_02959, score=0.5, range=1386-1407  
strand=1  
target 5' AAGGCAAAUAGAAACGAAAAGA 3'  
:::~::~:  
query 3' UUUCGUUUUAUCUUUGCUUUUCU 5'  
query=novel\_mir\_43, target=R03G\_06427, score=0.5, range=978-999,  
strand=1  
target 5' AAGGCAAAUAGAAACGAAAAGA 3'  
:::~::~:  
query 3' UUUCGUUUUAUCUUUGCUUUUCU 5'  
query=novel\_mir\_43, target=R03G\_06428, score=0.5, range=480-501,  
strand=1

target 5' AAGGCAAAUAGAAACGAAAAGA 3'  
:::~::~  
query 3' UUUCGUUUUAUCUUUGCUUUUCU 5'  
query=novel\_mir\_43, target=R03G\_04114, score=0.5, range=1386-1407  
strand=1  
target 5' AAGGCAAAUAGAAACGAAAAGA 3'  
:::~::~  
query 3' UUUCGUUUUAUCUUUGCUUUUCU 5'  
query=novel\_mir\_43, target=R03G\_02221, score=0.5, range=1308-1329  
strand=1  
target 5' AAGGCAAAUAGAAACGAAAAGA 3'  
:::~::~  
query 3' UUUCGUUUUAUCUUUGCUUUUCU 5'  
query=novel\_mir\_43, target=R03G\_05272, score=0.5, range=1386-1407  
strand=1  
target 5' AAGGCAAAUAGAAACGAAAAGA 3'  
:::~::~  
query 3' UUUCGUUUUAUCUUUGCUUUUCU 5'  
query=novel\_mir\_43, target=R03G\_08608, score=0.5, range=1902-1923  
strand=1  
target 5' AAGGCAAAUAGAAACGAAAAGA 3'  
:::~::~  
query 3' UUUCGUUUUAUCUUUGCUUUUCU 5'  
query=novel\_mir\_43, target=R03G\_05617, score=0.5, range=1386-1407  
strand=1  
target 5' AAGGCAAAUAGAAACGAAAAGA 3'  
:::~::~  
query 3' UUUCGUUUUAUCUUUGCUUUUCU 5'  
query=novel\_mir\_43, target=R03G\_11234, score=0.5, range=1386-1407  
strand=1  
target 5' AAGGCAAAUAGAAACGAAAAGA 3'  
:::~::~  
query 3' UUUCGUUUUAUCUUUGCUUUUCU 5'  
query=novel\_mir\_43, target=R03G\_07036, score=0.5, range=588-609,  
strand=1  
target 5' AAGGCAAAUAGAAACGAAAAGA 3'  
:::~::~  
query 3' UUUCGUUUUAUCUUUGCUUUUCU 5'  
query=novel\_mir\_43, target=R03G\_01615, score=2, range=939-960,  
strand=1  
target 5' AAAGCAAAUAGAAACGAAUAGA 3'  
:::~::~  
query 3' UUUCGUUUUAUCUUUGCUUUUCU 5'  
query=novel\_mir\_43, target=R03G\_17371, score=2.5, range=1386-1407  
strand=1

target 5' AAGGCAAAUAGAAUCGAAAAGA 3'  
 :::::::::::::: ::::::::::  
 query 3' UUUCGUUUUAUCUUUGCUUUUCU 5'  
 query=novel\_mir\_43, target=R03G\_15250, score=2.5, range=1386-1407  
 strand=1

target 5' AAGGCAAAUAGAAUCGAAAAGA 3'  
 :::::::::::::: ::::::::::  
 query 3' UUUCGUUUUAUCUUUGCUUUUCU 5'  
 query=novel\_mir\_43, target=R03G\_17083, score=3, range=1821-1843,  
 strand=1

target 5' AAAGCAAAAAGAAACAGAAAAGA 3'  
 :::::::::: :::::::::: ::::::::::  
 query 3' UUUCGUUUUAUCUUUG-CUUUUCU 5'  
 query=novel\_mir\_43, target=R03G\_14388, score=3.5, range=229-250,  
 strand=1

target 5' GCAGCAAAAAGAAAUGAAAAGA 3'  
 . :::::::::: ::::::::::::::::::::  
 query 3' UUUCGUUUUAUCUUUGCUUUUCU 5'  
 query=novel\_mir\_43, target=R03G\_14100, score=4, range=181-202,  
 strand=1

target 5' AAAGAAGAUAGAAAUGAAGAGG 3'  
 :::: ::::::::::::::::::::.  
 query 3' UUUCGUUUUAUCUUUGCUUUUCU 5'  
 query=novel\_mir\_43, target=R03G\_12746, score=4, range=19-40, stra  
 target 5' AAAGUGAAAGGAAACGAAAAGU 3'  
 :::::::::: . ::::::::::::::::::::  
 query 3' UUUCGUUUUAUCUUUGCUUUUCU 5'  
 query=novel\_mir\_43, target=R03G\_14917, score=4, range=2187-2207,  
 strand=1

target 5' AGAGUAAAUAGAAA-GAAAAGA 3'  
 :::: :::::::::: ::::::::::  
 query 3' UUUCGUUUUAUCUUUGCUUUUCU 5'  
 query=novel\_mir\_43, target=R03G\_10253, score=4, range=724-744,  
 strand=1

target 5' AAGACAAAUAGAAA-GAAAAGG 3'  
 :: :::::::::::::: ::::::::::.  
 query 3' UUUCGUUUUAUCUUUGCUUUUCU 5'  
 query=novel\_mir\_43, target=R03G\_11015, score=4, range=780-801,  
 strand=1

target 5' AAAACAAAGAGAAAAGAAAAGA 3'  
 ::: :::: :::::: ::::::::::  
 query 3' UUUCGUUUUAUCUUUGCUUUUCU 5'  
 query=novel\_mir\_43, target=R03G\_07831, score=4, range=351-371,  
 strand=1

target 5' AAAGGAAA-AGAGACGAAAGGA 3'

```
:::: :: : ::::::::::::::
query 3' UUUCGUUUUAUCUUUGCUUUUCU 5'
query=novel_mir_43, target=R03G_05455, score=4, range=42-62, stra
target 5' AAAACAAUUA-AAACGAAAAGA 3'
::: :: : : ::::::::::::::
query 3' UUUCGUUUUAUCUUUGCUUUUCU 5'
query=novel_mir_43, target=R03G_12579, score=4, range=34-56, stra
target 5' AAGGCAGUAAGAGACGAGAAGA 3'
:::::::::: : ::::::::::::::
query 3' UUUCGUUUA-UCUUUGCUUUUCU 5'
query=novel_mir_97, target=R03G_07871, score=1, range=828-849,
strand=1
target 5' CCAAUGCAGCAAACUUUGGCA 3'
: ::::::::::::::::::::
query 3' GCGUUACGUCGUUUGAAACCGU 5'
query=novel_mir_121, target=R03G_05038, score=4, range=668-688,
strand=-1
target 5' AUACAGUAAUUUCUCC-UUCCA 3'
::::: :::::::::::::: : ::::
query 3' UAUGUAAUUAAGAGGCGAGGU 5'
query=novel_mir_121, target=R03G_11852, score=4, range=960-980,
strand=-1
target 5' GUA-AUUGCUUUCUCCGCUCUA 3'
.:: :::: : :::::::::::::::
query 3' UAUGUAAUUAAGAGGCGAGGU 5'
query=novel_mir_42, target=R03G_08820, score=1, range=539-558,
strand=1
target 5' GACUUACAAAGGGCAACCAA 3'
::::::::::: ::::::::::::::
query 3' CUGAAUGUUUCUCGUUGGUU 5'
query=novel_mir_42, target=R03G_12738, score=2.5, range=90-109,
strand=1
target 5' GGUUGAUAAAGAGCAACCAA 3'
:..: : ::::::::::::::::::::
query 3' CUGAAUGUUUCUCGUUGGUU 5'
query=novel_mir_42, target=R03G_11190, score=3, range=129-149,
strand=1
target 5' GACCUUACAGAGAGCAGCCAA 3'
:: : ::::::::::::::::::::
query 3' CU-GAAUGUUUCUCGUUGGUU 5'
query=novel_mir_42, target=R03G_07376, score=3, range=1573-1591,
strand=1
target 5' GAAUUA-GAAGAGCAACCAA 3'
:: ::: : ::::::::::::::::::::
query 3' CUGAAUGUUUCUCGUUGGUU 5'
```

query=novel\_mir\_42, target=R03G\_11625, score=3.5, range=703-722,  
strand=1  
target 5' UAUUUACAAGGAGCGACCAA 3'  
:.....:.....  
query 3' CUGAAUGUUUCUCGUUGGUU 5'  
query=novel\_mir\_42, target=R03G\_04754, score=3.5, range=2401-2420  
strand=1  
target 5' GACUUGAAAGGAGCAGCCAA 3'  
:..... :.....  
query 3' CUGAAUGUUUCUCGUUGGUU 5'  
query=novel\_mir\_42, target=R03G\_03372, score=3.5, range=160-178,  
strand=1  
target 5' UAC-UAUAAAGAGCAAUCAA 3'  
: : :.....:.....  
query 3' CUGAAUGUUUCUCGUUGGUU 5'  
query=novel\_mir\_42, target=R03G\_10833, score=3.5, range=495-514,  
strand=-1  
target 5' GACUUGCCGAGAGCAACCAA 3'  
:.....: :.....:.....  
query 3' CUGAAUGUUUCUCGUUGGUU 5'  
query=novel\_mir\_42, target=R03G\_15043, score=3.5, range=62-80,  
strand=-1  
target 5' GA-UGGCAAAGGGCAACCAA 3'  
: : : : :.....:.....  
query 3' CUGAAUGUUUCUCGUUGGUU 5'  
query=novel\_mir\_42, target=R03G\_16847, score=4, range=753-772,  
strand=1  
target 5' CAUUUAUGAAGAGCAACCAU 3'  
:.....:.....:.....  
query 3' CUGAAUGUUUCUCGUUGGUU 5'  
query=novel\_mir\_42, target=R03G\_08937, score=4, range=182-201,  
strand=1  
target 5' AAUGUAUGAAGAGCAACCAA 3'  
: : :.....:.....:.....  
query 3' CUGAAUGUUUCUCGUUGGUU 5'  
query=novel\_mir\_42, target=R03G\_07635, score=4, range=23-43, stra  
target 5' CAUUUGAUAAAGAGCAAUCAA 3'  
: : : : :.....:.....:.....  
query 3' CUGAA-UGUUUCUCGUUGGUU 5'  
query=novel\_mir\_42, target=R03G\_06920, score=4, range=385-404,  
strand=1  
target 5' GGGAUGAAAAGAGCAACCAA 3'  
: : : : :.....:.....:.....  
query 3' CUGAAUGUUUCUCGUUGGUU 5'  
query=novel\_mir\_42, target=R03G\_08884, score=4, range=1142-1161,

strand=1  
target 5' GUAAUAGAAAGAGCAACCAA 3'  
: :: :::::::::::::::  
query 3' CUGAAUGUUUCUCGUUGGUU 5'  
query=novel\_mir\_42, target=R03G\_10824, score=4, range=3-21, stran  
target 5' GAGUGACAAAGAG-AACCAA 3'  
:: : ::::::::::: :::::::  
query 3' CUGAAUGUUUCUCGUUGGUU 5'  
query=novel\_mir\_42, target=R03G\_06893, score=4, range=82-100, str  
target 5' GACUUA-AAAGAUCAACCAC 3'  
::::: :::::: :::::::  
query 3' CUGAAUGUUUCUCGUUGGUU 5'  
query=novel\_mir\_42, target=R03G\_04069, score=4, range=62-80, stra  
target 5' GA-UGACAAAGGGCAGCCAA 3'  
:: : :::::::::::::::  
query 3' CUGAAUGUUUCUCGUUGGUU 5'  
query=novel\_mir\_18, target=R03G\_11601, score=2, range=56-75, stra  
target 5' AUCAAUCUCAGUGGGCUCCA 3'  
::::: :::::: :::::::  
query 3' UAGUUAGAGUCAACCGAGGU 5'  
query=novel\_mir\_18, target=R03G\_06300, score=2.5, range=143-162,  
strand=-1  
target 5' AUCGAUCUCAGUUGGAUCCA 3'  
::::: :::::: :::::::  
query 3' UAGUUAGAGUCAACCGAGGU 5'  
query=novel\_mir\_18, target=R03G\_11919, score=3, range=188-207,  
strand=-1  
target 5' AUCAAUCUCAGUUGGCAUCA 3'  
::::: :::::: :::::::  
query 3' UAGUUAGAGUCAACCGAGGU 5'  
query=novel\_mir\_18, target=R03G\_03159, score=3.5, range=563-582,  
strand=-1  
target 5' AACAAUCUCAGUUGCCUCCG 3'  
: ::::::::::::::: ::::::.  
query 3' UAGUUAGAGUCAACCGAGGU 5'  
query=novel\_mir\_18, target=R03G\_00131, score=3.5, range=425-444,  
strand=-1  
target 5' AACAAUCUCAGUUGCCUCCG 3'  
: ::::::::::::::: ::::::.  
query 3' UAGUUAGAGUCAACCGAGGU 5'  
query=novel\_mir\_18, target=R03G\_06944, score=4, range=138-157,  
strand=1  
target 5' AUCAAUCUUGGUUGGCUACA 3'  
::::: :::::: :::::::  
query 3' UAGUUAGAGUCAACCGAGGU 5'



query=novel\_mir\_18, target=R03G\_17067, score=4, range=1073-1093,  
strand=1  
target 5' CUCAUGUCUCGGUUGGCUCCG 3'  
::: .....  
query 3' UAGU-UAGAGUCAACCGAGGU 5'  
query=novel\_mir\_18, target=R03G\_03157, score=4, range=3129-3147,  
strand=1  
target 5' AUCAA-CUUAUUUGGCUCCA 3'  
:::: :.: :  
query 3' UAGUUAGAGUCAACCGAGGU 5'  
query=novel\_mir\_95, target=R03G\_05640, score=1, range=656-677,  
strand=-1  
target 5' AUCAUGCCACUAUCCUUCAUCC 3'  
:::::::::::  
query 3' UAGUACGGUGAUAGGAAGUAGU 5'  
query=novel\_mir\_95, target=R03G\_16742, score=1, range=761-782,  
strand=-1  
target 5' AUCAUGCCACUAUCCUUCAUCC 3'  
:::::::::::  
query 3' UAGUACGGUGAUAGGAAGUAGU 5'  
query=novel\_mir\_95, target=R03G\_02824, score=1, range=761-782,  
strand=-1  
target 5' AUCAUGCCACUAUCCUUCAUCC 3'  
:::::::::::  
query 3' UAGUACGGUGAUAGGAAGUAGU 5'  
query=novel\_mir\_95, target=R03G\_17416, score=1, range=761-782,  
strand=-1  
target 5' AUCAUGCCACUAUCCUUCAUCC 3'  
:::::::::::  
query 3' UAGUACGGUGAUAGGAAGUAGU 5'  
query=novel\_mir\_95, target=R03G\_17291, score=1, range=761-782,  
strand=-1  
target 5' AUCAUGCCACUAUCCUUCAUCC 3'  
:::::::::::  
query 3' UAGUACGGUGAUAGGAAGUAGU 5'  
query=novel\_mir\_95, target=R03G\_13714, score=1, range=761-782,  
strand=-1  
target 5' AUCAUGCCACUAUCCUUCAUCC 3'  
:::::::::::  
query 3' UAGUACGGUGAUAGGAAGUAGU 5'  
query=novel\_mir\_95, target=R03G\_16372, score=1, range=761-782,  
strand=-1  
target 5' AUCAUGCCACUAUCCUUCAUCC 3'  
:::::::::::  
query 3' UAGUACGGUGAUAGGAAGUAGU 5'







query=novel\_mir\_95, target=R03G\_15271, score=3.5, range=761-782,  
strand=-1  
target 5' AUCAUGC UAAUAUCCUUCAUCC 3'  
.....: .....

query 3' UAGUACGGUGAUAGGAAGUAGU 5'  
query=novel\_mir\_95, target=R03G\_16725, score=3.5, range=503-524,  
strand=-1  
target 5' AUCAUGC UAAUAUCCUUCAUCC 3'  
.....: .....

query 3' UAGUACGGUGAUAGGAAGUAGU 5'  
query=novel\_mir\_95, target=R03G\_10402, score=4, range=406-426,  
strand=1  
target 5' GAUAU-UUACUAUCCUUCAUCA 3'  
. .:: .....

query 3' UAGUACGGUGAUAGGAAGUAGU 5'  
query=novel\_mir\_95, target=R03G\_03979, score=4, range=612-632,  
strand=1  
target 5' AGCA-GCCACUAUACUUCAUCA 3'  
: :: .....

query 3' UAGUACGGUGAUAGGAAGUAGU 5'  
query=novel\_mir\_95, target=R03G\_15434, score=4, range=3690-3710,  
strand=-1  
target 5' UUCGUGUCACUAUCC-UCAUCA 3'  
.....: .....

query 3' UAGUACGGUGAUAGGAAGUAGU 5'  
query=novel\_mir\_95, target=R03G\_00202, score=4, range=114-134,  
strand=-1  
target 5' AUCAUUCUGCUAUCC-UCAUCA 3'  
.....: .....

query 3' UAGUACGGUGAUAGGAAGUAGU 5'  
query=novel\_mir\_13, target=R03G\_09594, score=0, range=47-66, stra  
target 5' UCCUCUCUUACCGAACGUA 3'  
.....: .....

query 3' AGGAGAGAAUGGACUUGCAU 5'  
query=novel\_mir\_13, target=R03G\_11961, score=2, range=552-571,  
strand=1  
target 5' UCCUCUCUUACCGAACGUA 3'  
.....: .....

query 3' AGGAGAGAAUGGACUUGCAU 5'  
query=novel\_mir\_13, target=R03G\_06107, score=4, range=1171-1190,  
strand=1  
target 5' UCUUCUCUCACCGGACGUG 3'  
.....: .....

query 3' AGGAGAGAAUGGACUUGCAU 5'  
query=novel\_mir\_13, target=R03G\_06102, score=4, range=177-196,

strand=1  
target 5' UCAGCUCUUGUCUGAACGUA 3'  
:: :::::::::::::::::::::  
query 3' AGGAGAGAAUGGACUUGCAU 5'  
query=novel\_mir\_13, target=R03G\_13655, score=4, range=433-452,  
strand=-1  
target 5' UUAUCUAUUUAUCUGAACGUG 3'  
:. ::: :::::::::::::::::::::  
query 3' AGGAGAGAAUGGACUUGCAU 5'  
query=novel\_mir\_13, target=R03G\_06359, score=4, range=772-790,  
strand=-1  
target 5' UUUUCUC-UACUUGAACGUA 3'  
..... :::::::::::::::::::::  
query 3' AGGAGAGAAUGGACUUGCAU 5'  
query=novel\_mir\_19, target=R03G\_06718, score=0, range=107-128,  
strand=1  
target 5' UAGUACUCGAUCCUACAGACCA 3'  
:::::::::::::::::::  
query 3' AUCAUGAGCUAGGAUGUCUGGU 5'  
query=novel\_mir\_124, target=R03G\_01198, score=0, range=319-338,  
strand=1  
target 5' CAACAACAGCAACAAGAGCA 3'  
:::::::::::::::::::  
query 3' GUUGUUGUCGUUGUUCUCGU 5'  
query=novel\_mir\_124, target=R03G\_13711, score=0, range=319-338,  
strand=1  
target 5' CAACAACAGCAACAAGAGCA 3'  
:::::::::::::::::::  
query 3' GUUGUUGUCGUUGUUCUCGU 5'  
query=novel\_mir\_124, target=R03G\_16959, score=0, range=406-425,  
strand=1  
target 5' CAACAACAGCAACAAGAGCA 3'  
:::::::::::::::::::  
query 3' GUUGUUGUCGUUGUUCUCGU 5'  
query=novel\_mir\_124, target=R03G\_05910, score=0, range=319-338,  
strand=1  
target 5' CAACAACAGCAACAAGAGCA 3'  
:::::::::::::::::::  
query 3' GUUGUUGUCGUUGUUCUCGU 5'  
query=novel\_mir\_124, target=R03G\_05955, score=0, range=319-338,  
strand=1  
target 5' CAACAACAGCAACAAGAGCA 3'  
:::::::::::::::::::  
query 3' GUUGUUGUCGUUGUUCUCGU 5'  
query=novel\_mir\_124, target=R03G\_12192, score=0, range=319-338,

strand=1  
target 5' CAACAACAGCAACAAGAGCA 3'  
::::::::::::::::::::::::::  
query 3' GUUGUUGUCGUUGUUCUCGU 5'  
query=novel\_mir\_124, target=R03G\_17242, score=0, range=319-338,  
strand=1  
target 5' CAACAACAGCAACAAGAGCA 3'  
::::::::::::::::::::::::::  
query 3' GUUGUUGUCGUUGUUCUCGU 5'  
query=novel\_mir\_124, target=R03G\_09184, score=0, range=31-50, str  
target 5' CAACAACAGCAACAAGAGCA 3'  
::::::::::::::::::::::::::  
query 3' GUUGUUGUCGUUGUUCUCGU 5'  
query=novel\_mir\_124, target=R03G\_07115, score=0, range=280-299,  
strand=1  
target 5' CAACAACAGCAACAAGAGCA 3'  
::::::::::::::::::::::::::  
query 3' GUUGUUGUCGUUGUUCUCGU 5'  
query=novel\_mir\_124, target=R03G\_10737, score=0, range=319-338,  
strand=1  
target 5' CAACAACAGCAACAAGAGCA 3'  
::::::::::::::::::::::::::  
query 3' GUUGUUGUCGUUGUUCUCGU 5'  
query=novel\_mir\_124, target=R03G\_00259, score=0, range=319-338,  
strand=1  
target 5' CAACAACAGCAACAAGAGCA 3'  
::::::::::::::::::::::::::  
query 3' GUUGUUGUCGUUGUUCUCGU 5'  
query=novel\_mir\_124, target=R03G\_15256, score=0, range=319-338,  
strand=1  
target 5' CAACAACAGCAACAAGAGCA 3'  
::::::::::::::::::::::::::  
query 3' GUUGUUGUCGUUGUUCUCGU 5'  
query=novel\_mir\_124, target=R03G\_02231, score=0, range=319-338,  
strand=1  
target 5' CAACAACAGCAACAAGAGCA 3'  
::::::::::::::::::::::::::  
query 3' GUUGUUGUCGUUGUUCUCGU 5'  
query=novel\_mir\_124, target=R03G\_02827, score=0, range=319-338,  
strand=1  
target 5' CAACAACAGCAACAAGAGCA 3'  
::::::::::::::::::::::::::  
query 3' GUUGUUGUCGUUGUUCUCGU 5'  
query=novel\_mir\_124, target=R03G\_16127, score=0, range=319-338,  
strand=1









```
..... : : : :
query 3' GUUGUUGUCGUUGUUCUCGU 5'
query=novel_mir_124, target=R03G_07939, score=2.5, range=1396-141
strand=1
target 5' CAGCAACAGCAACAACAGCA 3'
..... : : : :
query 3' GUUGUUGUCGUUGUUCUCGU 5'
query=novel_mir_124, target=R03G_02027, score=2.5, range=616-635,
strand=1
target 5' CAGCAACAGCAACAACAGCA 3'
..... : : : :
query 3' GUUGUUGUCGUUGUUCUCGU 5'
query=novel_mir_124, target=R03G_03857, score=2.5, range=409-428,
strand=1
target 5' CAGCAACAGCAACAACAGCA 3'
..... : : : :
query 3' GUUGUUGUCGUUGUUCUCGU 5'
query=novel_mir_124, target=R03G_14401, score=2.5, range=634-653,
strand=1
target 5' CAGCAACAGCAACAACAGCA 3'
..... : : : :
query 3' GUUGUUGUCGUUGUUCUCGU 5'
query=novel_mir_124, target=R03G_07798, score=2.5, range=775-794,
strand=1
target 5' CAGCAACAGCAACAACAGCA 3'
..... : : : :
query 3' GUUGUUGUCGUUGUUCUCGU 5'
query=novel_mir_124, target=R03G_15592, score=2.5, range=539-558,
strand=1
target 5' CAACAGCAGCAACAACAGCA 3'
..... : : : :
query 3' GUUGUUGUCGUUGUUCUCGU 5'
query=novel_mir_124, target=R03G_08675, score=2.5, range=214-233,
strand=1
target 5' CAGCAACAGCAACAACAGCA 3'
..... : : : :
query 3' GUUGUUGUCGUUGUUCUCGU 5'
query=novel_mir_124, target=R03G_07091, score=2.5, range=589-608,
strand=1
target 5' CAACAGCAGCAACAACAGCA 3'
..... : : : :
query 3' GUUGUUGUCGUUGUUCUCGU 5'
query=novel_mir_124, target=R03G_00007, score=2.5, range=634-653,
strand=1
target 5' CAGCAACAGCAACAACAGCA 3'
```

```
..... : : : :
query 3' GUUGUUGUCGUUGUUCUCGU 5'
query=novel_mir_124, target=R03G_05906, score=2.5, range=286-305,
strand=1
target 5' CAGCAACAGCAACAACAGCA 3'
..... : : : :
query 3' GUUGUUGUCGUUGUUCUCGU 5'
query=novel_mir_124, target=R03G_01671, score=2.5, range=349-368,
strand=1
target 5' CAGCAACAGCAACAACAGCA 3'
..... : : : :
query 3' GUUGUUGUCGUUGUUCUCGU 5'
query=novel_mir_124, target=R03G_00271, score=2.5, range=494-513,
strand=1
target 5' CAACGACAGCAACAACAGCA 3'
..... : : : :
query 3' GUUGUUGUCGUUGUUCUCGU 5'
query=novel_mir_124, target=R03G_01453, score=2.5, range=461-480,
strand=1
target 5' UACCAUCAGCAACAAGAGCA 3'
.: : : : : : : : : :
query 3' GUUGUUGUCGUUGUUCUCGU 5'
query=novel_mir_124, target=R03G_16959, score=2.5, range=547-566,
strand=1
target 5' CAGCAACAGCAACAACAGCA 3'
..... : : : :
query 3' GUUGUUGUCGUUGUUCUCGU 5'
query=novel_mir_124, target=R03G_09085, score=2.5, range=781-800,
strand=1
target 5' CAACAGCAGCAACAACAGCA 3'
..... : : : :
query 3' GUUGUUGUCGUUGUUCUCGU 5'
query=novel_mir_124, target=R03G_02252, score=2.5, range=349-369,
strand=1
target 5' CAACAGCAGCAACAAGAAGCA 3'
..... : : : :
query 3' GUUGUUGUCGUUGUUC-UCGU 5'
query=novel_mir_124, target=R03G_06473, score=2.5, range=2605-262
strand=1
target 5' CAGCAACAGCAACAA-AGCA 3'
..... : : : :
query 3' GUUGUUGUCGUUGUUCUCGU 5'
query=novel_mir_124, target=R03G_12353, score=2.5, range=1035-105
strand=-1
target 5' CAAU AACAGCACCAAGAGCA 3'
```

```
::::: :
query 3' GUUGUUGUCGUUGUUCUCGU 5'
query=novel_mir_124, target=R03G_02065, score=2.5, range=855-874,
strand=-1
target 5' CAGUGUCAGCAACAAGAGCA 3'
::: :
query 3' GUUGUUGUCGUUGUUCUCGU 5'
query=novel_mir_124, target=R03G_02337, score=2.5, range=1209-122
strand=-1
target 5' UGAUAUCAGCAACAAGAGCA 3'
::: :
query 3' GUUGUUGUCGUUGUUCUCGU 5'
query=novel_mir_124, target=R03G_09884, score=3, range=256-275,
strand=1
target 5' GAGCAGCAGCAGCAAGAGCA 3'
::: :
query 3' GUUGUUGUCGUUGUUCUCGU 5'
query=novel_mir_124, target=R03G_12891, score=3, range=2584-2603,
strand=1
target 5' CAACAACAGCAACAGCAGCA 3'
::::: :
query 3' GUUGUUGUCGUUGUUCUCGU 5'
query=novel_mir_124, target=R03G_16618, score=3, range=2254-2273,
strand=1
target 5' CAACAACAGCAACAGCAGCA 3'
::::: :
query 3' GUUGUUGUCGUUGUUCUCGU 5'
query=novel_mir_124, target=R03G_00766, score=3, range=1378-1397,
strand=1
target 5' CAACAACAGCAGCAACAGCA 3'
::::: :
query 3' GUUGUUGUCGUUGUUCUCGU 5'
query=novel_mir_124, target=R03G_00949, score=3, range=1141-1160,
strand=1
target 5' CAACAACAGCAACAGCAGCA 3'
::::: :
query 3' GUUGUUGUCGUUGUUCUCGU 5'
query=novel_mir_124, target=R03G_10815, score=3, range=1978-1997,
strand=1
target 5' CAACAACAGCAGCAACAGCA 3'
::::: :
query 3' GUUGUUGUCGUUGUUCUCGU 5'
query=novel_mir_124, target=R03G_05396, score=3, range=1342-1361,
strand=1
target 5' CAACAACAGCAACAGCAGCA 3'
```

::::: :  
query 3' GUUGUUGUCGUUGUUCUCGU 5'  
query=novel\_mir\_124, target=R03G\_04228, score=3, range=415-434,  
strand=1  
target 5' CAACAACAGCAACAGCAGCA 3'  
::::: :  
query 3' GUUGUUGUCGUUGUUCUCGU 5'  
query=novel\_mir\_124, target=R03G\_03075, score=3, range=1756-1775,  
strand=1  
target 5' CAACAACAGCAACAGCAGCA 3'  
::::: :  
query 3' GUUGUUGUCGUUGUUCUCGU 5'  
query=novel\_mir\_124, target=R03G\_11135, score=3, range=535-554,  
strand=1  
target 5' CAACAACAGCAGCAAGAACA 3'  
::::: :  
query 3' GUUGUUGUCGUUGUUCUCGU 5'  
query=novel\_mir\_124, target=R03G\_10995, score=3, range=1423-1442,  
strand=1  
target 5' CAACAACAACAACGAGAGCA 3'  
::::: :  
query 3' GUUGUUGUCGUUGUUCUCGU 5'  
query=novel\_mir\_124, target=R03G\_08607, score=3, range=1429-1448,  
strand=1  
target 5' CAACAACAGCAACAACGGCA 3'  
::::: :  
query 3' GUUGUUGUCGUUGUUCUCGU 5'  
query=novel\_mir\_124, target=R03G\_10494, score=3, range=691-710,  
strand=1  
target 5' CAACAACAGCAACAGCAGCA 3'  
::::: :  
query 3' GUUGUUGUCGUUGUUCUCGU 5'  
query=novel\_mir\_124, target=R03G\_00162, score=3, range=7-26, str  
target 5' CAACAACAGCAGCAACAGCA 3'  
::::: :  
query 3' GUUGUUGUCGUUGUUCUCGU 5'  
query=novel\_mir\_124, target=R03G\_06665, score=3, range=718-737,  
strand=1  
target 5' CAACAACAGCAACAGCAGCA 3'  
::::: :  
query 3' GUUGUUGUCGUUGUUCUCGU 5'  
query=novel\_mir\_124, target=R03G\_01793, score=3, range=415-434,  
strand=1  
target 5' CAACAACAGCAGCAACAGCA 3'  
::::: :



query 3' GUUGUUGUCGUUGUUCUCGU 5'  
query=novel\_mir\_124, target=R03G\_15422, score=3, range=1248-1267,  
strand=1  
target 5' CAGCAGCAGCAACAACAGCA 3'  
..... : : : :  
query 3' GUUGUUGUCGUUGUUCUCGU 5'  
query=novel\_mir\_124, target=R03G\_12391, score=3, range=796-815,  
strand=1  
target 5' CAGCAGCAGCAACAACAGCA 3'  
..... : : : :  
query 3' GUUGUUGUCGUUGUUCUCGU 5'  
query=novel\_mir\_124, target=R03G\_09692, score=3, range=401-420,  
strand=1  
target 5' CAACUACAGCAACAACAGCA 3'  
:::: : : : : : : : :  
query 3' GUUGUUGUCGUUGUUCUCGU 5'  
query=novel\_mir\_124, target=R03G\_03495, score=3, range=21-39, str  
target 5' UAA-AGCAGCAGCAAGAGCA 3'  
. : : : : : : : : : : : : : :  
query 3' GUUGUUGUCGUUGUUCUCGU 5'  
query=novel\_mir\_124, target=R03G\_03203, score=3, range=256-275,  
strand=1  
target 5' CAACAUCAGCAACAACAGCA 3'  
..... : : : : : : : :  
query 3' GUUGUUGUCGUUGUUCUCGU 5'  
query=novel\_mir\_124, target=R03G\_04482, score=3, range=615-635,  
strand=1  
target 5' CAACAAACAGCAACAACAGCA 3'  
:::: : : : : : : : :  
query 3' GUUG-UUGUCGUUGUUCUCGU 5'  
query=novel\_mir\_124, target=R03G\_02027, score=3, range=0-0, stran  
target 5' CAACAACAGCAACAGCAGCA 3'  
..... : : : :  
query 3' GUUGUUGUCGUUGUUCUCGU 5'  
query=novel\_mir\_124, target=R03G\_05396, score=3, range=1282-1301,  
strand=1  
target 5' CAACAACAGCAACAGCAGCA 3'  
..... : : : :  
query 3' GUUGUUGUCGUUGUUCUCGU 5'  
query=novel\_mir\_124, target=R03G\_11504, score=3, range=213-232,  
strand=-1  
target 5' CAGCAGCAGCAGCAGGAGCA 3'  
..... : : : :  
query 3' GUUGUUGUCGUUGUUCUCGU 5'  
query=novel\_mir\_124, target=R03G\_02764, score=3, range=213-232,



strand=-1  
target 5' CAGCAGCAGCAGCAGGAGCA 3'  
.....  
query 3' GUUGUUGUCGUUGUUCUCGU 5'  
query=novel\_mir\_124, target=R03G\_07886, score=3, range=81-100,  
strand=-1  
target 5' CAGCAGCAGCAACAAGAGUU 3'  
.....  
query 3' GUUGUUGUCGUUGUUCUCGU 5'  
query=novel\_mir\_124, target=R03G\_15193, score=3, range=72-91,  
strand=-1  
target 5' CAACAACAGCAACAGCAGCA 3'  
.....  
query 3' GUUGUUGUCGUUGUUCUCGU 5'  
query=novel\_mir\_124, target=R03G\_08022, score=3, range=195-214,  
strand=-1  
target 5' UAACAAUAGCAACAAUAGCA 3'  
. ....  
query 3' GUUGUUGUCGUUGUUCUCGU 5'  
query=novel\_mir\_124, target=R03G\_06800, score=3, range=33-52,  
strand=-1  
target 5' CAGCAGCAGCAACAACAGCA 3'  
.....  
query 3' GUUGUUGUCGUUGUUCUCGU 5'  
query=novel\_mir\_124, target=R03G\_15454, score=3, range=132-151,  
strand=-1  
target 5' CAGCAGCAGGAACAAGAGCA 3'  
.....  
query 3' GUUGUUGUCGUUGUUCUCGU 5'  
query=novel\_mir\_124, target=R03G\_03860, score=3, range=321-340,  
strand=-1  
target 5' UUUCAGCAGCAACAAGAGCA 3'  
. ....  
query 3' GUUGUUGUCGUUGUUCUCGU 5'  
query=novel\_mir\_124, target=R03G\_10385, score=3, range=33-52,  
strand=-1  
target 5' CAUGAACAGCAGCAAGAGCA 3'  
:: .....  
query 3' GUUGUUGUCGUUGUUCUCGU 5'  
query=novel\_mir\_124, target=R03G\_06514, score=3, range=300-319,  
strand=-1  
target 5' CAACUAAAGCAAUAAGAGCA 3'  
:::: : .....  
query 3' GUUGUUGUCGUUGUUCUCGU 5'  
query=novel\_mir\_124, target=R03G\_00092, score=3, range=689-707,

strand=-1  
target 5' CACCAACAGCAACAA-AGCA 3'  
:: :::::::::::::: ::::  
query 3' GUUGUUGUCGUUGUUCUCGU 5'  
query=novel\_mir\_124, target=R03G\_02199, score=3.5, range=543-562,  
strand=1  
target 5' AAGCAGUAGCAACAAGAGUA 3'  
:.....:.  
query 3' GUUGUUGUCGUUGUUCUCGU 5'  
query=novel\_mir\_124, target=R03G\_08882, score=3.5, range=4165-418  
strand=1  
target 5' CAGCAACAGCAGCAACAGCA 3'  
:.....:.  
query 3' GUUGUUGUCGUUGUUCUCGU 5'  
query=novel\_mir\_124, target=R03G\_08982, score=3.5, range=61-80,  
strand=1  
target 5' CAACAGCAGCAACAGCAGCA 3'  
:.....:.  
query 3' GUUGUUGUCGUUGUUCUCGU 5'  
query=novel\_mir\_124, target=R03G\_08704, score=3.5, range=2125-214  
strand=1  
target 5' CAGCAACAGCAGCAACAGCA 3'  
:.....:.  
query 3' GUUGUUGUCGUUGUUCUCGU 5'  
query=novel\_mir\_124, target=R03G\_15031, score=3.5, range=1327-134  
strand=1  
target 5' CAACAGCAGCAACAGCAGCA 3'  
:.....:.  
query 3' GUUGUUGUCGUUGUUCUCGU 5'  
query=novel\_mir\_124, target=R03G\_02642, score=3.5, range=793-812,  
strand=1  
target 5' CAACAGCAGCAGCAACAGCA 3'  
:.....:.  
query 3' GUUGUUGUCGUUGUUCUCGU 5'  
query=novel\_mir\_124, target=R03G\_01472, score=3.5, range=1192-121  
strand=1  
target 5' CAACAGCAGCAGCAACAGCA 3'  
:.....:.  
query 3' GUUGUUGUCGUUGUUCUCGU 5'  
query=novel\_mir\_124, target=R03G\_00544, score=3.5, range=1366-138  
strand=1  
target 5' CAACAGCAGCAGCAACAGCA 3'  
:.....:.  
query 3' GUUGUUGUCGUUGUUCUCGU 5'  
query=novel\_mir\_124, target=R03G\_04562, score=3.5, range=2197-221

strand=1  
target 5' CAGCAACAGCAGCAACAGCA 3'  
..... : : : :  
query 3' GUUGUUGUCGUUGUUCUCGU 5'  
query=novel\_mir\_124, target=R03G\_11678, score=3.5, range=841-860,  
strand=1  
target 5' CAACAGCAGCAGCAACAGCA 3'  
..... : : : :  
query 3' GUUGUUGUCGUUGUUCUCGU 5'  
query=novel\_mir\_124, target=R03G\_10935, score=3.5, range=1318-133  
strand=1  
target 5' CAACAGCAGCAGCAACAGCA 3'  
..... : : : :  
query 3' GUUGUUGUCGUUGUUCUCGU 5'  
query=novel\_mir\_124, target=R03G\_10883, score=3.5, range=1759-177  
strand=1  
target 5' CAGCAACAGCAACAGCAGCA 3'  
..... : : : :  
query 3' GUUGUUGUCGUUGUUCUCGU 5'  
query=novel\_mir\_124, target=R03G\_12746, score=3.5, range=472-491,  
strand=1  
target 5' CAACAGCAGCAACAGCAGCA 3'  
..... : : : :  
query 3' GUUGUUGUCGUUGUUCUCGU 5'  
query=novel\_mir\_124, target=R03G\_07933, score=3.5, range=337-356,  
strand=1  
target 5' CAGCAACAGCAACAGCAGCA 3'  
..... : : : :  
query 3' GUUGUUGUCGUUGUUCUCGU 5'  
query=novel\_mir\_124, target=R03G\_03907, score=3.5, range=185-204,  
strand=1  
target 5' CAGCAACAGCAAUAACAGCA 3'  
..... : : : :  
query 3' GUUGUUGUCGUUGUUCUCGU 5'  
query=novel\_mir\_124, target=R03G\_00934, score=3.5, range=280-299,  
strand=1  
target 5' CAACAGCAGCAGCAACAGCA 3'  
..... : : : :  
query 3' GUUGUUGUCGUUGUUCUCGU 5'  
query=novel\_mir\_124, target=R03G\_16901, score=3.5, range=355-374,  
strand=1  
target 5' CAGCAACAGCAACAGCAGCA 3'  
..... : : : :  
query 3' GUUGUUGUCGUUGUUCUCGU 5'  
query=novel\_mir\_124, target=R03G\_16582, score=3.5, range=115-134,

strand=1  
target 5' CAACAGCAGCAGCAAGAACA 3'  
::::: ::  
query 3' GUUGUUGUCGUUGUUCUCGU 5'  
query=novel\_mir\_124, target=R03G\_16917, score=3.5, range=361-380,  
strand=1  
target 5' CAGCAACAGCAACAGCAGCA 3'  
::::: ::  
query 3' GUUGUUGUCGUUGUUCUCGU 5'  
query=novel\_mir\_124, target=R03G\_01717, score=3.5, range=352-371,  
strand=1  
target 5' CAGCAACAGCAACAGCAGCA 3'  
::::: ::  
query 3' GUUGUUGUCGUUGUUCUCGU 5'  
query=novel\_mir\_124, target=R03G\_12011, score=3.5, range=349-368,  
strand=1  
target 5' CAGCAACAGCAACAGCAGCA 3'  
::::: ::  
query 3' GUUGUUGUCGUUGUUCUCGU 5'  
query=novel\_mir\_124, target=R03G\_02817, score=3.5, range=358-377,  
strand=1  
target 5' CAGCAACAGCAACAGCAGCA 3'  
::::: ::  
query 3' GUUGUUGUCGUUGUUCUCGU 5'  
query=novel\_mir\_124, target=R03G\_01458, score=3.5, range=165-184,  
strand=1  
target 5' UAACAACAGCAGCAAUAGCA 3'  
.:::::: ::  
query 3' GUUGUUGUCGUUGUUCUCGU 5'  
query=novel\_mir\_124, target=R03G\_17433, score=3.5, range=346-365,  
strand=1  
target 5' CAGCAACAGCAACAGCAGCA 3'  
::::: ::  
query 3' GUUGUUGUCGUUGUUCUCGU 5'  
query=novel\_mir\_124, target=R03G\_16743, score=3.5, range=292-311,  
strand=1  
target 5' CAACAGCAGCAGCAACAGCA 3'  
::::: ::  
query 3' GUUGUUGUCGUUGUUCUCGU 5'  
query=novel\_mir\_124, target=R03G\_07692, score=3.5, range=283-302,  
strand=1  
target 5' CAGCAACAGCAACAGCAGCA 3'  
::::: ::  
query 3' GUUGUUGUCGUUGUUCUCGU 5'  
query=novel\_mir\_124, target=R03G\_15879, score=3.5, range=268-287,

```
strand=1
target 5' CAGCAACAGCAACAGCAGCA 3'
::::::::::::. ....
query 3' GUUGUUGUCGUUGUUCUCGU 5'
query=novel_mir_124, target=R03G_10043, score=3.5, range=343-362,
strand=1
target 5' CAGCAACAGCAACAGCAGCA 3'
::::::::::::. ....
query 3' GUUGUUGUCGUUGUUCUCGU 5'
query=novel_mir_124, target=R03G_00600, score=3.5, range=259-278,
strand=1
target 5' CAGCAACAGCAACAGCAGCA 3'
::::::::::::. ....
query 3' GUUGUUGUCGUUGUUCUCGU 5'
query=novel_mir_124, target=R03G_16369, score=3.5, range=328-347,
strand=1
target 5' CAGCAACAGCAACAGCAGCA 3'
::::::::::::. ....
query 3' GUUGUUGUCGUUGUUCUCGU 5'
query=novel_mir_124, target=R03G_13452, score=3.5, range=322-341,
strand=1
target 5' CAACAGCAGCAGCAACAGCA 3'
::::::::::. ....
query 3' GUUGUUGUCGUUGUUCUCGU 5'
query=novel_mir_124, target=R03G_15194, score=3.5, range=241-260,
strand=1
target 5' CAACAGCAGCAACAGCAGCA 3'
::::::::::. ....
query 3' GUUGUUGUCGUUGUUCUCGU 5'
query=novel_mir_124, target=R03G_05730, score=3.5, range=657-676,
strand=1
target 5' CAACAGCAGCAACGACAGCA 3'
::::::::::. ....
query 3' GUUGUUGUCGUUGUUCUCGU 5'
query=novel_mir_124, target=R03G_17265, score=3.5, range=250-269,
strand=1
target 5' CAGCAACAGCAACAGCAGCA 3'
::::::::::::. ....
query 3' GUUGUUGUCGUUGUUCUCGU 5'
query=novel_mir_124, target=R03G_01192, score=3.5, range=286-305,
strand=1
target 5' CAGCAACAGCAACAGCAGCA 3'
::::::::::::. ....
query 3' GUUGUUGUCGUUGUUCUCGU 5'
query=novel_mir_124, target=R03G_06268, score=3.5, range=603-622,
```

strand=1  
target 5' CAACAGCAGCAGCAACAGCA 3'  
::::: ::::  
query 3' GUUGUUGUCGUUGUUCUCGU 5'  
query=novel\_mir\_124, target=R03G\_06121, score=3.5, range=721-740,  
strand=1  
target 5' CAGCAACAGCAGCAACAGCA 3'  
::::: ::::  
query 3' GUUGUUGUCGUUGUUCUCGU 5'  
query=novel\_mir\_124, target=R03G\_17244, score=3.5, range=346-365,  
strand=1  
target 5' CAGCAACAGCAACAGCAGCA 3'  
::::: ::::  
query 3' GUUGUUGUCGUUGUUCUCGU 5'  
query=novel\_mir\_124, target=R03G\_11543, score=3.5, range=349-368,  
strand=1  
target 5' CAGCAACAGCAACAGCAGCA 3'  
::::: ::::  
query 3' GUUGUUGUCGUUGUUCUCGU 5'  
query=novel\_mir\_124, target=R03G\_12078, score=3.5, range=49-68,  
strand=1  
target 5' CAGCAACAGCAACAGCAGCA 3'  
::::: ::::  
query 3' GUUGUUGUCGUUGUUCUCGU 5'  
query=novel\_mir\_124, target=R03G\_14553, score=3.5, range=349-368,  
strand=1  
target 5' CAGCAACAGCAACAGCAGCA 3'  
::::: ::::  
query 3' GUUGUUGUCGUUGUUCUCGU 5'  
query=novel\_mir\_124, target=R03G\_17460, score=3.5, range=373-392,  
strand=1  
target 5' CAGCAACAGCAACAGCAGCA 3'  
::::: ::::  
query 3' GUUGUUGUCGUUGUUCUCGU 5'  
query=novel\_mir\_124, target=R03G\_05347, score=3.5, range=349-368,  
strand=1  
target 5' CAGCAACAGCAACAGCAGCA 3'  
::::: ::::  
query 3' GUUGUUGUCGUUGUUCUCGU 5'  
query=novel\_mir\_124, target=R03G\_06612, score=3.5, range=1403-142  
strand=1  
target 5' CGACCACAGCAGCAGGAGCA 3'  
:::: : :::::  
query 3' GUUGUUGUCGUUGUUCUCGU 5'  
query=novel\_mir\_124, target=R03G\_04831, score=3.5, range=1676-169

strand=1  
target 5' CAGCAGUAGCAACAACAGCA 3'  
..... : : : :  
query 3' GUUGUUGUCGUUGUUCUCGU 5'  
query=novel\_mir\_124, target=R03G\_07164, score=3.5, range=1960-197  
strand=1  
target 5' CAGCAACAGCAACAACAGCU 3'  
..... : : : :  
query 3' GUUGUUGUCGUUGUUCUCGU 5'  
query=novel\_mir\_124, target=R03G\_04640, score=3.5, range=289-308,  
strand=1  
target 5' GAACAGCAGCAACAACAGCA 3'  
..... : : : :  
query 3' GUUGUUGUCGUUGUUCUCGU 5'  
query=novel\_mir\_124, target=R03G\_08856, score=3.5, range=4299-431  
strand=1  
target 5' GAACAGUGAGCAACAAGAGCG 3'  
..... : : : : : : : : : :  
query 3' GUUGUUG-UCGUUGUUCUCGU 5'  
query=novel\_mir\_124, target=R03G\_00547, score=3.5, range=1838-185  
strand=1  
target 5' UGA-AACAGCAGCAAGAGCG 3'  
... : : : : : : : : : :  
query 3' GUUGUUGUCGUUGUUCUCGU 5'  
query=novel\_mir\_124, target=R03G\_15594, score=3.5, range=646-665,  
strand=1  
target 5' CAGCAAGAACAACAAGAGCA 3'  
..... : : : : : : : : : :  
query 3' GUUGUUGUCGUUGUUCUCGU 5'  
query=novel\_mir\_124, target=R03G\_06483, score=3.5, range=594-613,  
strand=1  
target 5' CAACGAAAGCAACAAUAGCA 3'  
..... : : : : : : : : : :  
query 3' GUUGUUGUCGUUGUUCUCGU 5'  
query=novel\_mir\_124, target=R03G\_06266, score=3.5, range=121-140,  
strand=1  
target 5' CAUCAGCAACAACAAGAGCA 3'  
:: : : : : : : : : : : : : : : :  
query 3' GUUGUUGUCGUUGUUCUCGU 5'  
query=novel\_mir\_124, target=R03G\_09480, score=3.5, range=2770-279  
strand=1  
target 5' CUACAAGCAGCAGCAAGAGCG 3'  
: : : : : : : : : : : : : : : :  
query 3' GUUGUU-GUCGUUGUUCUCGU 5'  
query=novel\_mir\_124, target=R03G\_10676, score=3.5, range=1720-174





target 5' CAACAGCAGCAACAGGAACA 3'  
:.....: :  
query 3' GUUGUUGUCGUUGUUCUCGU 5'  
query=novel\_mir\_124, target=R03G\_10815, score=3.5, range=2548-256  
strand=1  
target 5' CAACAGCAGCAGCAACAGCA 3'  
:.....: :  
query 3' GUUGUUGUCGUUGUUCUCGU 5'  
query=novel\_mir\_124, target=R03G\_07615, score=3.5, range=688-707,  
strand=1  
target 5' CAGCAACAGCAACAGCAGCA 3'  
:.....: :  
query 3' GUUGUUGUCGUUGUUCUCGU 5'  
query=novel\_mir\_124, target=R03G\_06121, score=3.5, range=688-707,  
strand=1  
target 5' UGGCAACAGCAACAAAAGCA 3'  
.....: :  
query 3' GUUGUUGUCGUUGUUCUCGU 5'  
query=novel\_mir\_124, target=R03G\_15299, score=3.5, range=1006-102  
strand=1  
target 5' CAGCAACGGCAACAAGA-CA 3'  
:.....: :  
query 3' GUUGUUGUCGUUGUUCUCGU 5'  
query=novel\_mir\_124, target=R03G\_05396, score=3.5, range=967-986,  
strand=1  
target 5' CAGCAACAGCAACAAGGACA 3'  
:.....: :  
query 3' GUUGUUGUCGUUGUUCUCGU 5'  
query=novel\_mir\_124, target=R03G\_05396, score=3.5, range=1573-159  
strand=1  
target 5' CAACAGCAGCAGCAACAGCA 3'  
:.....: :  
query 3' GUUGUUGUCGUUGUUCUCGU 5'  
query=novel\_mir\_124, target=R03G\_15548, score=3.5, range=258-277,  
strand=-1  
target 5' AAACAGCAGCAGCAGGAGCA 3'  
:.....: :  
query 3' GUUGUUGUCGUUGUUCUCGU 5'  
query=novel\_mir\_124, target=R03G\_08938, score=3.5, range=156-175,  
strand=-1  
target 5' UGACAGCAGCAGCAAGAGCC 3'  
.....: :  
query 3' GUUGUUGUCGUUGUUCUCGU 5'  
query=novel\_mir\_124, target=R03G\_04434, score=3.5, range=831-850,  
strand=-1

target 5' CAGCAACAGCAAGAAGAGUA 3'  
:.....: :.....:  
query 3' GUUGUUGUCGUUGUUCUCGU 5'  
query=novel\_mir\_124, target=R03G\_14021, score=3.5, range=21-40,  
strand=-1  
target 5' CAGCAACAGCAACAGCAGCA 3'  
:.....: :.....:  
query 3' GUUGUUGUCGUUGUUCUCGU 5'  
query=novel\_mir\_124, target=R03G\_10822, score=3.5, range=696-715,  
strand=-1  
target 5' CAAUAGUAGCAACCAGAGCA 3'  
:.....: :.....:  
query 3' GUUGUUGUCGUUGUUCUCGU 5'  
query=novel\_mir\_124, target=R03G\_13723, score=3.5, range=642-661,  
strand=-1  
target 5' CAAUAGUAGCAACCAGAGCA 3'  
:.....: :.....:  
query 3' GUUGUUGUCGUUGUUCUCGU 5'  
query=novel\_mir\_124, target=R03G\_01682, score=3.5, range=588-607,  
strand=-1  
target 5' CAAUAGUAGCAACCAGAGCA 3'  
:.....: :.....:  
query 3' GUUGUUGUCGUUGUUCUCGU 5'  
query=novel\_mir\_124, target=R03G\_01331, score=3.5, range=345-364,  
strand=-1  
target 5' CAAAGACAGCAGCAAGGGCA 3'  
::: :.....: :.....:  
query 3' GUUGUUGUCGUUGUUCUCGU 5'  
query=novel\_mir\_124, target=R03G\_16159, score=3.5, range=696-715,  
strand=-1  
target 5' CAAUAGUAGCAACCAGAGCA 3'  
:.....: :.....:  
query 3' GUUGUUGUCGUUGUUCUCGU 5'  
query=novel\_mir\_124, target=R03G\_17119, score=3.5, range=23-43,  
strand=-1  
target 5' GAACAGCAGCAACUAAGAGCA 3'  
:.....: :.....:  
query 3' GUUGUUGUCGUUG-UUCUCGU 5'  
query=novel\_mir\_124, target=R03G\_12822, score=3.5, range=1158-117  
strand=-1  
target 5' AAGCAUCAGCAACAGGAGCA 3'  
:..: :.....: :.....:  
query 3' GUUGUUGUCGUUGUUCUCGU 5'  
query=novel\_mir\_124, target=R03G\_04311, score=3.5, range=204-223,  
strand=-1







query 3' GUUGUUGUCGUUGUUCUCGU 5'  
query=novel\_mir\_124, target=R03G\_16262, score=4, range=156-175,  
strand=1  
target 5' CAACAACAGCAGCAGCAGCA 3'  
..... :  
query 3' GUUGUUGUCGUUGUUCUCGU 5'  
query=novel\_mir\_124, target=R03G\_01552, score=4, range=151-170,  
strand=1  
target 5' CAACAACAGCAACAGCGGCA 3'  
..... :  
query 3' GUUGUUGUCGUUGUUCUCGU 5'  
query=novel\_mir\_124, target=R03G\_04845, score=4, range=329-348,  
strand=1  
target 5' CAACAACAGCAGCAGCAGCA 3'  
..... :  
query 3' GUUGUUGUCGUUGUUCUCGU 5'  
query=novel\_mir\_124, target=R03G\_07958, score=4, range=1277-1296,  
strand=1  
target 5' CGGCAACAGCAGCAACAGCA 3'  
..... :  
query 3' GUUGUUGUCGUUGUUCUCGU 5'  
query=novel\_mir\_124, target=R03G\_08772, score=4, range=2878-2897,  
strand=1  
target 5' CAGCAGCAGCAACAGCAGCA 3'  
..... :  
query 3' GUUGUUGUCGUUGUUCUCGU 5'  
query=novel\_mir\_124, target=R03G\_13607, score=4, range=577-596,  
strand=1  
target 5' CAGCAGCAGCAGCAAGAACA 3'  
..... :  
query 3' GUUGUUGUCGUUGUUCUCGU 5'  
query=novel\_mir\_124, target=R03G\_11614, score=4, range=88-107,  
strand=1  
target 5' CAGCAGCAGCAACAGCAGCA 3'  
..... :  
query 3' GUUGUUGUCGUUGUUCUCGU 5'  
query=novel\_mir\_124, target=R03G\_09497, score=4, range=55-74, str  
target 5' CAGCAGCAGCAGCAACAGCA 3'  
..... :  
query 3' GUUGUUGUCGUUGUUCUCGU 5'  
query=novel\_mir\_124, target=R03G\_11209, score=4, range=6251-6270,  
strand=1  
target 5' CAGCAGAAGUAACAAGAGUA 3'  
..... :  
query 3' GUUGUUGUCGUUGUUCUCGU 5'

query=novel\_mir\_124, target=R03G\_13941, score=4, range=237-256,  
strand=1  
target 5' AAGCAGCAGCAGCAAGAGCC 3'  
:.....  
query 3' GUUGUUGUCGUUGUUCUCGU 5'  
query=novel\_mir\_124, target=R03G\_07652, score=4, range=1123-1142,  
strand=1  
target 5' GAACAACAGCAACAGCAGCA 3'  
:..... :  
query 3' GUUGUUGUCGUUGUUCUCGU 5'  
query=novel\_mir\_124, target=R03G\_02772, score=4, range=1577-1596,  
strand=1  
target 5' AAACAACAACAACAGGAGCA 3'  
:..... :  
query 3' GUUGUUGUCGUUGUUCUCGU 5'  
query=novel\_mir\_124, target=R03G\_03548, score=4, range=825-844,  
strand=1  
target 5' CAACAACAGCAACAACAGUU 3'  
:..... :.  
query 3' GUUGUUGUCGUUGUUCUCGU 5'  
query=novel\_mir\_124, target=R03G\_05657, score=4, range=70-89, str  
target 5' CAACAACAGCAGCAACAGCU 3'  
:..... :  
query 3' GUUGUUGUCGUUGUUCUCGU 5'  
query=novel\_mir\_124, target=R03G\_11763, score=4, range=70-89, str  
target 5' CAACAACAGCAACAAGAAGA 3'  
:..... :  
query 3' GUUGUUGUCGUUGUUCUCGU 5'  
query=novel\_mir\_124, target=R03G\_02307, score=4, range=337-356,  
strand=1  
target 5' CAGCAGCAGCAACAACAGCC 3'  
:..... :  
query 3' GUUGUUGUCGUUGUUCUCGU 5'  
query=novel\_mir\_124, target=R03G\_04578, score=4, range=221-240,  
strand=1  
target 5' AAACACCAGUAACAAGGGCA 3'  
: :..... :  
query 3' GUUGUUGUCGUUGUUCUCGU 5'  
query=novel\_mir\_124, target=R03G\_00960, score=4, range=14-33, str  
target 5' AGAAGACAGUAACAAGAGCA 3'  
. : :..... :  
query 3' GUUGUUGUCGUUGUUCUCGU 5'  
query=novel\_mir\_124, target=R03G\_09758, score=4, range=1138-1157,  
strand=1  
target 5' CAACAACAACAACAACAGCA 3'

```
:::::::::: ::::: ::::
query 3' GUUGUUGUCGUUGUUCUCGU 5'
query=novel_mir_124, target=R03G_04258, score=4, range=1754-1773,
strand=1
target 5' CAACAACAGCAACAUAAGAA 3'
:::::::::: :::
query 3' GUUGUUGUCGUUGUUCUCGU 5'
query=novel_mir_124, target=R03G_09894, score=4, range=1981-2000,
strand=1
target 5' CAACAACAACAACAAGAACA 3'
:::::::::: :::::
query 3' GUUGUUGUCGUUGUUCUCGU 5'
query=novel_mir_124, target=R03G_08194, score=4, range=2143-2162,
strand=1
target 5' CAACAACAACAACAACAGCA 3'
:::::::::: :::::
query 3' GUUGUUGUCGUUGUUCUCGU 5'
query=novel_mir_124, target=R03G_11868, score=4, range=850-869,
strand=1
target 5' CAACAACAACAACAACAGCA 3'
:::::::::: :::::
query 3' GUUGUUGUCGUUGUUCUCGU 5'
query=novel_mir_124, target=R03G_12847, score=4, range=604-623,
strand=1
target 5' CAACAACAACAACAACAGCA 3'
:::::::::: :::::
query 3' GUUGUUGUCGUUGUUCUCGU 5'
query=novel_mir_124, target=R03G_15224, score=4, range=1136-1155,
strand=1
target 5' CAACAACAACAACAACAGCA 3'
:::::::::: :::::
query 3' GUUGUUGUCGUUGUUCUCGU 5'
query=novel_mir_124, target=R03G_00056, score=4, range=1519-1538,
strand=1
target 5' CAACAACAGCAACAACAACA 3'
:::::::::: : ::
query 3' GUUGUUGUCGUUGUUCUCGU 5'
query=novel_mir_124, target=R03G_08623, score=4, range=1042-1061,
strand=1
target 5' CAACAACAACAACAACAGCA 3'
:::::::::: :::::
query 3' GUUGUUGUCGUUGUUCUCGU 5'
query=novel_mir_124, target=R03G_15127, score=4, range=15-34, str
target 5' CAACAACAGCAACAACAACA 3'
:::::::::: : ::
```



query 3' GUUGUUGUCGUUGUUCUCGU 5'  
query=novel\_mir\_124, target=R03G\_12697, score=4, range=178-197,  
strand=1  
target 5' CAACAACAACAACAACAGCA 3'  
:::::::::: ::::: ::::  
query 3' GUUGUUGUCGUUGUUCUCGU 5'  
query=novel\_mir\_124, target=R03G\_05403, score=4, range=1405-1424,  
strand=1  
target 5' CAACAACAACAACAACAGCA 3'  
:::::::::: ::::: ::::  
query 3' GUUGUUGUCGUUGUUCUCGU 5'  
query=novel\_mir\_124, target=R03G\_15065, score=4, range=432-451,  
strand=1  
target 5' CAACAACAGCAACAACAACA 3'  
::::::::::: ::::: : ::  
query 3' GUUGUUGUCGUUGUUCUCGU 5'  
query=novel\_mir\_124, target=R03G\_06776, score=4, range=302-320,  
strand=1  
target 5' CAGCAGCAGCAGCAA-AGCA 3'  
::::::::::: ::::: ::::  
query 3' GUUGUUGUCGUUGUUCUCGU 5'  
query=novel\_mir\_124, target=R03G\_01092, score=4, range=514-533,  
strand=1  
target 5' CAACAACAACAACAACAGCA 3'  
:::::::::: ::::: ::::  
query 3' GUUGUUGUCGUUGUUCUCGU 5'  
query=novel\_mir\_124, target=R03G\_01350, score=4, range=700-719,  
strand=1  
target 5' CAACAACAGCAACAACAACA 3'  
::::::::::: ::::: : ::  
query 3' GUUGUUGUCGUUGUUCUCGU 5'  
query=novel\_mir\_124, target=R03G\_02527, score=4, range=904-923,  
strand=1  
target 5' CAACAACAACAACAAGAUCA 3'  
:::::::::: ::::: : ::  
query 3' GUUGUUGUCGUUGUUCUCGU 5'  
query=novel\_mir\_124, target=R03G\_06147, score=4, range=847-866,  
strand=1  
target 5' CAACAACAACAACAACAGCA 3'  
:::::::::: ::::: ::::  
query 3' GUUGUUGUCGUUGUUCUCGU 5'  
query=novel\_mir\_124, target=R03G\_00171, score=4, range=714-733,  
strand=1  
target 5' CAACAACAGCAACAACAACA 3'  
::::::::::: ::::: : ::





strand=1  
target 5' GAACUACAGCAACAAGAAGCA 3'  
::: :::::::::::::: ::::  
query 3' GUUGUUGUCGUUGUUC-UCGU 5'  
query=novel\_mir\_124, target=R03G\_09315, score=4, range=577-596,  
strand=1  
target 5' CAAGAAAAGCAACAAGAGUU 3'  
::: :: ::::::::::::::.  
query 3' GUUGUUGUCGUUGUUCUCGU 5'  
query=novel\_mir\_124, target=R03G\_14690, score=4, range=58-76, str  
target 5' CGACUACAGCAACAA-AGCG 3'  
:..: :::::::::::::: :..:  
query 3' GUUGUUGUCGUUGUUCUCGU 5'  
query=novel\_mir\_124, target=R03G\_06465, score=4, range=593-611,  
strand=1  
target 5' CAAAACCAGCAA-AAGAGCA 3'  
::: : :::::::::::::: ::::::::::  
query 3' GUUGUUGUCGUUGUUCUCGU 5'  
query=novel\_mir\_124, target=R03G\_02457, score=4, range=50-70, str  
target 5' UAGCAAAAAGCAAUCAAGAGCA 3'  
.:..: :..: :..: :..: :..: :..:  
query 3' GUUGUUGUCGUU-GUUCUCGU 5'  
query=novel\_mir\_124, target=R03G\_03212, score=4, range=154-173,  
strand=1  
target 5' CAACAACAGCAGCAGCAGCA 3'  
:..: :..: :..: :..: :..: :..:  
query 3' GUUGUUGUCGUUGUUCUCGU 5'  
query=novel\_mir\_124, target=R03G\_01361, score=4, range=457-476,  
strand=1  
target 5' CAACAACAGCAGCAGCAGCA 3'  
:..: :..: :..: :..: :..: :..:  
query 3' GUUGUUGUCGUUGUUCUCGU 5'  
query=novel\_mir\_124, target=R03G\_10995, score=4, range=1678-1697,  
strand=1  
target 5' CAACAACAGCAGCAGCAGCA 3'  
:..: :..: :..: :..: :..: :..:  
query 3' GUUGUUGUCGUUGUUCUCGU 5'  
query=novel\_mir\_124, target=R03G\_06473, score=4, range=1015-1034,  
strand=1  
target 5' CAACAACAGCAGCAGCAGCA 3'  
:..: :..: :..: :..: :..: :..:  
query 3' GUUGUUGUCGUUGUUCUCGU 5'  
query=novel\_mir\_124, target=R03G\_08982, score=4, range=190-209,  
strand=1  
target 5' CAACAACAGCAGCAGCAGCA 3'

query 3' GUUGUUGUCGUUGUUCUCGU 5'  
query=novel\_mir\_124, target=R03G\_02100, score=4, range=454-473,  
strand=1  
target 5' CAGCAGCAGCAACAGCAGCA 3'  
query 3' GUUGUUGUCGUUGUUCUCGU 5'  
query=novel\_mir\_124, target=R03G\_12391, score=4, range=835-854,  
strand=1  
target 5' CAGCAGCAGCAUCAAGAGCC 3'  
query 3' GUUGUUGUCGUUGUUCUCGU 5'  
query=novel\_mir\_124, target=R03G\_08675, score=4, range=103-122,  
strand=1  
target 5' CAACAACAGCAACAACAACA 3'  
query 3' GUUGUUGUCGUUGUUCUCGU 5'  
query=novel\_mir\_124, target=R03G\_15194, score=4, range=481-500,  
strand=1  
target 5' CAACAACAGCAACAACAACA 3'  
query 3' GUUGUUGUCGUUGUUCUCGU 5'  
query=novel\_mir\_124, target=R03G\_08547, score=4, range=226-245,  
strand=1  
target 5' CAACAACAACAACAACAGCA 3'  
query 3' GUUGUUGUCGUUGUUCUCGU 5'  
query=novel\_mir\_124, target=R03G\_02527, score=4, range=979-998,  
strand=1  
target 5' CAACAACAGCAACAACAACA 3'  
query 3' GUUGUUGUCGUUGUUCUCGU 5'  
query=novel\_mir\_124, target=R03G\_16326, score=4, range=679-698,  
strand=1  
target 5' CAACAACAACAACAACAGCA 3'  
query 3' GUUGUUGUCGUUGUUCUCGU 5'  
query=novel\_mir\_124, target=R03G\_00934, score=4, range=304-323,  
strand=1  
target 5' CAACAACAGCAACAACAACA 3'  
query 3' GUUGUUGUCGUUGUUCUCGU 5'  
query=novel\_mir\_124, target=R03G\_07933, score=4, range=406-425,  
strand=1  
target 5' CAACAACAACAACAACAGCA 3'

::::: : : : :  
query 3' GUUGUUGUCGUUGUUCUCGU 5'  
query=novel\_mir\_124, target=R03G\_03477, score=4, range=277-296,  
strand=1  
target 5' CAACAACAACAACAACAGCA 3'  
::::: : : : :  
query 3' GUUGUUGUCGUUGUUCUCGU 5'  
query=novel\_mir\_124, target=R03G\_10399, score=4, range=364-383,  
strand=1  
target 5' CAACAACAACAACAACAGCA 3'  
::::: : : : :  
query 3' GUUGUUGUCGUUGUUCUCGU 5'  
query=novel\_mir\_124, target=R03G\_12746, score=4, range=505-524,  
strand=1  
target 5' CAACAACAACAACAACAGCA 3'  
::::: : : : :  
query 3' GUUGUUGUCGUUGUUCUCGU 5'  
query=novel\_mir\_124, target=R03G\_11678, score=4, range=820-839,  
strand=1  
target 5' CAACAACAGCAACAACAACA 3'  
::::: : : : :  
query 3' GUUGUUGUCGUUGUUCUCGU 5'  
query=novel\_mir\_124, target=R03G\_04522, score=4, range=1534-1553,  
strand=1  
target 5' CAACAACAACAACAACAGCA 3'  
::::: : : : :  
query 3' GUUGUUGUCGUUGUUCUCGU 5'  
query=novel\_mir\_124, target=R03G\_12904, score=4, range=1008-1027,  
strand=1  
target 5' CAACAACAGCAACAACAACA 3'  
::::: : : : :  
query 3' GUUGUUGUCGUUGUUCUCGU 5'  
query=novel\_mir\_124, target=R03G\_05308, score=4, range=2467-2486,  
strand=1  
target 5' CAACAACAGCAACAACAACA 3'  
::::: : : : :  
query 3' GUUGUUGUCGUUGUUCUCGU 5'  
query=novel\_mir\_124, target=R03G\_16582, score=4, range=655-675,  
strand=1  
target 5' CAACAACAGCAACAACAAGCA 3'  
::::: : : : :  
query 3' GUUGUUGUCGUUGUU-CUCGU 5'  
query=novel\_mir\_124, target=R03G\_00949, score=4, range=1189-1208,  
strand=1  
target 5' CAACAACAACAACAACAGCA 3'

```
:::::::::: ::::: :::::
query 3' GUUGUUGUCGUUGUUCUCGU 5'
query=novel_mir_124, target=R03G_15329, score=4, range=2926-2945,
strand=1
target 5' CAACAACAACAACAACAGCA 3'
:::::::::: ::::: :::::
query 3' GUUGUUGUCGUUGUUCUCGU 5'
query=novel_mir_124, target=R03G_17242, score=4, range=229-248,
strand=1
target 5' CAGAUGCAGCAGCAAGAGCA 3'
::: .:::::::::::
query 3' GUUGUUGUCGUUGUUCUCGU 5'
query=novel_mir_124, target=R03G_12192, score=4, range=229-248,
strand=1
target 5' CAGAUGCAGCAGCAAGAGCA 3'
::: .:::::::::::
query 3' GUUGUUGUCGUUGUUCUCGU 5'
query=novel_mir_124, target=R03G_05955, score=4, range=229-248,
strand=1
target 5' CAGAUGCAGCAGCAAGAGCA 3'
::: .:::::::::::
query 3' GUUGUUGUCGUUGUUCUCGU 5'
query=novel_mir_124, target=R03G_01198, score=4, range=229-248,
strand=1
target 5' CAGAUGCAGCAGCAAGAGCA 3'
::: .:::::::::::
query 3' GUUGUUGUCGUUGUUCUCGU 5'
query=novel_mir_124, target=R03G_05910, score=4, range=229-248,
strand=1
target 5' CAGAUGCAGCAGCAAGAGCA 3'
::: .:::::::::::
query 3' GUUGUUGUCGUUGUUCUCGU 5'
query=novel_mir_124, target=R03G_13711, score=4, range=229-248,
strand=1
target 5' CAGAUGCAGCAGCAAGAGCA 3'
::: .:::::::::::
query 3' GUUGUUGUCGUUGUUCUCGU 5'
query=novel_mir_124, target=R03G_15256, score=4, range=229-248,
strand=1
target 5' CAGAUGCAGCAGCAAGAGCA 3'
::: .:::::::::::
query 3' GUUGUUGUCGUUGUUCUCGU 5'
query=novel_mir_124, target=R03G_16127, score=4, range=229-248,
strand=1
target 5' CAGAUGCAGCAGCAAGAGCA 3'
```





query 3' GUUGUUGUCGUUGUUCUCGU 5'  
query=novel\_mir\_124, target=R03G\_07933, score=4, range=0-0, stran  
target 5' CAACAACAGCAGCAGCAGCA 3'  
..... :  
query 3' GUUGUUGUCGUUGUUCUCGU 5'  
query=novel\_mir\_124, target=R03G\_03682, score=4, range=58-77,  
strand=-1  
target 5' CAACAACAGCAGCAGCAGCA 3'  
..... :  
query 3' GUUGUUGUCGUUGUUCUCGU 5'  
query=novel\_mir\_124, target=R03G\_03227, score=4, range=1758-1777,  
strand=-1  
target 5' CAACAACAGCAGCGACAGCA 3'  
..... :  
query 3' GUUGUUGUCGUUGUUCUCGU 5'  
query=novel\_mir\_124, target=R03G\_04860, score=4, range=54-73,  
strand=-1  
target 5' CAACAACAGCAGCAGCAGCA 3'  
..... :  
query 3' GUUGUUGUCGUUGUUCUCGU 5'  
query=novel\_mir\_124, target=R03G\_00351, score=4, range=939-958,  
strand=-1  
target 5' CAACAACAGUAACAAGAGAU 3'  
..... :  
query 3' GUUGUUGUCGUUGUUCUCGU 5'  
query=novel\_mir\_124, target=R03G\_07494, score=4, range=648-667,  
strand=-1  
target 5' UAGCAACAUAACAGGAGCA 3'  
..... :  
query 3' GUUGUUGUCGUUGUUCUCGU 5'  
query=novel\_mir\_124, target=R03G\_06259, score=4, range=1686-1705,  
strand=-1  
target 5' CAGCAAUAGCAAUAACAGCA 3'  
..... :  
query 3' GUUGUUGUCGUUGUUCUCGU 5'  
query=novel\_mir\_124, target=R03G\_02456, score=4, range=18-37,  
strand=-1  
target 5' UAGCAACAGCAACAAUGGCA 3'  
..... :  
query 3' GUUGUUGUCGUUGUUCUCGU 5'  
query=novel\_mir\_124, target=R03G\_15621, score=4, range=3254-3274,  
strand=-1  
target 5' UGACAACAGCGACAAGUAGCA 3'  
..... :  
query 3' GUUGUUGUCGUUGUUC-UCGU 5'

query=novel\_mir\_124, target=R03G\_02334, score=4, range=327-346,  
strand=-1  
target 5' CAGCGACAGCAGCAAUAGCA 3'  
.....: :  
query 3' GUUGUUGUCGUUGUUCUCGU 5'  
query=novel\_mir\_124, target=R03G\_14650, score=4, range=1700-1720,  
strand=-1  
target 5' CAAUAGCAGCAGGCAAGAGCA 3'  
.....: :  
query 3' GUUGUUGUCGU-UGUUCUCGU 5'  
query=novel\_mir\_124, target=R03G\_16166, score=4, range=2334-2353,  
strand=-1  
target 5' CAGGAGCAGCAGCAGGAGCA 3'  
.. :.....: :  
query 3' GUUGUUGUCGUUGUUCUCGU 5'  
query=novel\_mir\_124, target=R03G\_09746, score=4, range=2424-2443,  
strand=-1  
target 5' AAACAACAUCAGCAAGAGCA 3'  
.....: :.....: :  
query 3' GUUGUUGUCGUUGUUCUCGU 5'  
query=novel\_mir\_124, target=R03G\_11514, score=4, range=1056-1075,  
strand=-1  
target 5' UGACAACAGCAACAAGACCU 3'  
.....: :  
query 3' GUUGUUGUCGUUGUUCUCGU 5'  
query=novel\_mir\_124, target=R03G\_13632, score=4, range=1056-1075,  
strand=-1  
target 5' CAGCAGCAGCACCAAGAGCC 3'  
.....: :.....: :  
query 3' GUUGUUGUCGUUGUUCUCGU 5'  
query=novel\_mir\_124, target=R03G\_07144, score=4, range=393-411,  
strand=-1  
target 5' CAAU-GCAGCAAUAAGGGCA 3'  
... :.....: :  
query 3' GUUGUUGUCGUUGUUCUCGU 5'  
query=novel\_mir\_124, target=R03G\_03647, score=4, range=462-481,  
strand=-1  
target 5' CAUCAACAGUAACAAAAGCA 3'  
:: :.....: : : :  
query 3' GUUGUUGUCGUUGUUCUCGU 5'  
query=novel\_mir\_124, target=R03G\_12627, score=4, range=762-781,  
strand=-1  
target 5' CAACACCAGCAACAAGUGUA 3'  
.....: : : :  
query 3' GUUGUUGUCGUUGUUCUCGU 5'

query=novel\_mir\_124, target=R03G\_06586, score=4, range=27-45,  
strand=-1  
target 5' CAAU-GCAGUAGCAAGAGCA 3'  
::: .::::.::::.::::.::::  
query 3' GUUGUUGUCGUUGUUCUCGU 5'  
query=novel\_mir\_124, target=R03G\_11663, score=4, range=318-337,  
strand=-1  
target 5' CAACAAGAGCAACAGGAUCA 3'  
:::::: ::::::::::: ::  
query 3' GUUGUUGUCGUUGUUCUCGU 5'  
query=novel\_mir\_124, target=R03G\_15791, score=4, range=375-395,  
strand=-1  
target 5' CAAUCAACAACAACAAGGGCA 3'  
::: ::::: ::::::::::: ::  
query 3' GUU-GUUGUCGUUGUUCUCGU 5'  
query=novel\_mir\_124, target=R03G\_12127, score=4, range=339-359,  
strand=-1  
target 5' CAAUCAACAACAACAAGGGCA 3'  
::: ::::: ::::::::::: ::  
query 3' GUU-GUUGUCGUUGUUCUCGU 5'  
query=novel\_mir\_124, target=R03G\_03148, score=4, range=351-370,  
strand=-1  
target 5' CCUUAGCAGCAACAGGAGCA 3'  
: .::::.::::.::::.::::  
query 3' GUUGUUGUCGUUGUUCUCGU 5'  
query=novel\_mir\_124, target=R03G\_06226, score=4, range=966-985,  
strand=-1  
target 5' CGAUAAAAGCAACAAGACCA 3'  
:::::: ::::::::::: ::  
query 3' GUUGUUGUCGUUGUUCUCGU 5'  
query=novel\_mir\_124, target=R03G\_02241, score=4, range=219-238,  
strand=-1  
target 5' CAAAGAUAGCAACAAGAACA 3'  
::: .::::.::::.::::.::::  
query 3' GUUGUUGUCGUUGUUCUCGU 5'  
query=novel\_mir\_124, target=R03G\_15433, score=4, range=1800-1820,  
strand=-1  
target 5' CUACGAGCAGCAAUAAGAGCG 3'  
: :: .::::.::::.::::.::::  
query 3' GUUG-UUGUCGUUGUUCUCGU 5'  
query=novel\_mir\_124, target=R03G\_02261, score=4, range=1893-1912,  
strand=-1  
target 5' CAAAACAGCAACAAGAUCC 3'  
::: ::::::::::: :  
query 3' GUUGUUGUCGUUGUUCUCGU 5'

query=novel\_mir\_124, target=R03G\_13478, score=4, range=363-381,  
strand=-1  
target 5' CAA-AACAGCAACAAUGGCA 3'  
::: :::::::::::::: ::::  
query 3' GUUGUUGUCGUUGUUCUCGU 5'  
query=novel\_mir\_124, target=R03G\_08587, score=4, range=63-82,  
strand=-1  
target 5' CACCAAAAGCAACAACAGCA 3'  
:: ::: :::::::::::::: ::::  
query 3' GUUGUUGUCGUUGUUCUCGU 5'  
query=novel\_mir\_124, target=R03G\_01622, score=4, range=138-156,  
strand=-1  
target 5' CAACAA-AGCAGCAAUAGCA 3'  
::::: :::::::::::::: ::::  
query 3' GUUGUUGUCGUUGUUCUCGU 5'  
query=novel\_mir\_124, target=R03G\_01621, score=4, range=138-156,  
strand=-1  
target 5' CAACAA-AGCAGCAAUAGCA 3'  
::::: :::::::::::::: ::::  
query 3' GUUGUUGUCGUUGUUCUCGU 5'  
query=novel\_mir\_124, target=R03G\_14115, score=4, range=1238-1258,  
strand=-1  
target 5' UAGCAACAGGCAACAAGAGCU 3'  
..::::: ::::::::::::::  
query 3' GUUGUUGU-CGUUGUUCUCGU 5'  
query=novel\_mir\_124, target=R03G\_15193, score=4, range=225-244,  
strand=-1  
target 5' CAACAACAACAACAACAGCA 3'  
:::::::::: :::::::::::::: ::::  
query 3' GUUGUUGUCGUUGUUCUCGU 5'  
query=novel\_mir\_124, target=R03G\_04860, score=4, range=78-97,  
strand=-1  
target 5' CAACAACAACAACAACAGCA 3'  
:::::::::: :::::::::::::: ::::  
query 3' GUUGUUGUCGUUGUUCUCGU 5'  
query=novel\_mir\_124, target=R03G\_09070, score=4, range=30-49,  
strand=-1  
target 5' CAACAACAGCAGCAGCAGCA 3'  
::::::::::: :::::::::::::: ::::  
query 3' GUUGUUGUCGUUGUUCUCGU 5'  
query=novel\_mir\_93, target=R03G\_14767, score=1, range=271-293,  
strand=-1  
target 5' AGGGUUUUGUGAGGCACUGUAUC 3'  
::::::::::: ::::::::::::::  
query 3' UCCCAAAACACUCCGUGACAUAU 5'











query=novel\_mir\_90, target=R03G\_14875, score=0.5, range=1088-1108  
strand=-1  
target 5' CCUAAAUAGAGCGGCUACUG 3'  
.....  
query 3' GGAAUUUAUCUCGCCGAUGAU 5'

query=novel\_mir\_90, target=R03G\_03144, score=0.5, range=662-682,  
strand=-1  
target 5' UCUAAAUAGAGCGGCUACUA 3'  
.:::::  
query 3' GGAAUUUAUCUCGCCGAUGAU 5'

query=novel\_mir\_90, target=R03G\_02421, score=0.5, range=617-637,  
strand=-1  
target 5' CCUAAAUAGAGCGGCUACUG 3'  
.....  
query 3' GGAAUUUAUCUCGCCGAUGAU 5'

query=novel\_mir\_90, target=R03G\_00616, score=0.5, range=311-331,  
strand=-1  
target 5' CCUAAAUAGAGCGGCUACUG 3'  
.....  
query 3' GGAAUUUAUCUCGCCGAUGAU 5'

query=novel\_mir\_90, target=R03G\_09103, score=1, range=464-484,  
strand=1  
target 5' CCUAAAUAGGGCGGCUACUA 3'  
.....  
query 3' GGAAUUUAUCUCGCCGAUGAU 5'

query=novel\_mir\_90, target=R03G\_13940, score=2.5, range=377-397,  
strand=1  
target 5' CCUAAAUAGAGCGACUACUG 3'  
.....  
query 3' GGAAUUUAUCUCGCCGAUGAU 5'

query=novel\_mir\_90, target=R03G\_15229, score=2.5, range=305-325,  
strand=1  
target 5' CCUAAAUAGAGCGACUACUG 3'  
.....  
query 3' GGAAUUUAUCUCGCCGAUGAU 5'

query=novel\_mir\_90, target=R03G\_04446, score=3.5, range=341-361,  
strand=1  
target 5' CCUAAAUAGAGCGACUAUUG 3'  
.....  
query 3' GGAAUUUAUCUCGCCGAUGAU 5'

query=novel\_mir\_88, target=R03G\_17168, score=1, range=954-976,  
strand=-1  
target 5' UCUUUGUCAUAGAGCGCGUGAUA 3'  
.....  
query 3' UGAAACAGUUACUCGCGCACUAU 5'

query=novel\_mir\_52, target=R03G\_12146, score=1.5, range=1032-1052  
strand=-1  
target 5' UCCUUCUUUUUCUCCUCCCCA 3'  
.....  
query 3' AGGAGGGGAAGAGGAAGGGGU 5'

query=novel\_mir\_52, target=R03G\_13996, score=2.5, range=217-237,  
strand=1  
target 5' UCCUCUCGUUCUCCUCCCCU 3'  
.....  
query 3' AGGAGGGGAAGAGGAAGGGGU 5'

query=novel\_mir\_52, target=R03G\_11176, score=2.5, range=378-398,  
strand=-1  
target 5' UCCUCCUCUUCUCCUCCUCC 3'  
.....  
query 3' AGGAGGGGAAGAGGAAGGGGU 5'

query=novel\_mir\_52, target=R03G\_05630, score=3, range=1192-1212,  
strand=1  
target 5' UCCUCUCCUUCUCCUUCUUCG 3'  
.....  
query 3' AGGAGGGGAAGAGGAAGGGGU 5'

query=novel\_mir\_52, target=R03G\_12863, score=3, range=820-840,  
strand=1  
target 5' UCUUCUCCUUCUUCUUCUCCA 3'  
.....  
query 3' AGGAGGGGAAGAGGAAGGGGU 5'

query=novel\_mir\_52, target=R03G\_07279, score=3, range=3574-3594,  
strand=1  
target 5' UCCUCCGCUUCUUCUCCUCA 3'  
.....  
query 3' AGGAGGGGAAGAGGAAGGGGU 5'

query=novel\_mir\_52, target=R03G\_07351, score=3, range=348-368,  
strand=-1  
target 5' UCCUCUUCUUCUUCUCCUCA 3'  
.....  
query 3' AGGAGGGGAAGAGGAAGGGGU 5'

query=novel\_mir\_52, target=R03G\_09014, score=3, range=1164-1184,  
strand=-1  
target 5' UCCUCUUCUUCUCCUCCUCC 3'  
.....  
query 3' AGGAGGGGAAGAGGAAGGGGU 5'

query=novel\_mir\_52, target=R03G\_04734, score=3, range=198-219,  
strand=-1  
target 5' UCCUCCUCCUUCUCCUUCUCCC 3'  
.....  
query 3' AGGAGG-GGAAGAGGAAGGGGU 5'

query=novel\_mir\_52, target=R03G\_01691, score=3.5, range=484-504,  
strand=1  
target 5' CCCUCUCCUUCUCCUCCUCU 3'  
:~::~  
query 3' AGGAGGGGAAGAGGAAGGGGU 5'  
query=novel\_mir\_52, target=R03G\_04771, score=3.5, range=606-626,  
strand=-1  
target 5' UCCUCCUCUUCUUCUUCUUCA 3'  
:~::~  
query 3' AGGAGGGGAAGAGGAAGGGGU 5'  
query=novel\_mir\_52, target=R03G\_03638, score=3.5, range=162-182,  
strand=-1  
target 5' UCCUCCUCUUCUUCUUCUUCA 3'  
:~::~  
query 3' AGGAGGGGAAGAGGAAGGGGU 5'  
query=novel\_mir\_52, target=R03G\_07832, score=3.5, range=630-650,  
strand=-1  
target 5' UCCUCCUCUUCUUCUUCUUCA 3'  
:~::~  
query 3' AGGAGGGGAAGAGGAAGGGGU 5'  
query=novel\_mir\_52, target=R03G\_01773, score=3.5, range=1230-1250  
strand=-1  
target 5' UCCUCCUCUUCUUCUCCUCC 3'  
:~::~  
query 3' AGGAGGGGAAGAGGAAGGGGU 5'  
query=novel\_mir\_52, target=R03G\_00417, score=3.5, range=60-80,  
strand=-1  
target 5' UCCUCCUCUUCUUCUCCUCC 3'  
:~::~  
query 3' AGGAGGGGAAGAGGAAGGGGU 5'  
query=novel\_mir\_52, target=R03G\_01098, score=3.5, range=378-398,  
strand=-1  
target 5' UCCUCCUCUUCUUCUUCUUCA 3'  
:~::~  
query 3' AGGAGGGGAAGAGGAAGGGGU 5'  
query=novel\_mir\_52, target=R03G\_15201, score=3.5, range=543-563,  
strand=-1  
target 5' UCCUCCUCUUCUUCUUCUUCA 3'  
:~::~  
query 3' AGGAGGGGAAGAGGAAGGGGU 5'  
query=novel\_mir\_52, target=R03G\_03013, score=3.5, range=1875-1895  
strand=-1  
target 5' UCCUCCUCUUCUUCUCCUCC 3'  
:~::~  
query 3' AGGAGGGGAAGAGGAAGGGGU 5'

query=novel\_mir\_52, target=R03G\_14266, score=3.5, range=102-122,  
strand=-1  
target 5' UCCUCCUCUUCUUCUUCUCCUCU 3'  
.....  
query 3' AGGAGGGGAAGAGGAAGGGGU 5'  
query=novel\_mir\_52, target=R03G\_13925, score=3.5, range=1344-1364  
strand=-1  
target 5' UCCUCCUCUUCUUCUUCUCCUCU 3'  
.....  
query 3' AGGAGGGGAAGAGGAAGGGGU 5'  
query=novel\_mir\_52, target=R03G\_10079, score=3.5, range=243-263,  
strand=-1  
target 5' UCCUCCUCUUCUUCUUCUCCUCU 3'  
.....  
query 3' AGGAGGGGAAGAGGAAGGGGU 5'  
query=novel\_mir\_52, target=R03G\_01341, score=3.5, range=345-365,  
strand=-1  
target 5' UCUUCCCCUUCUUCUUCACCA 3'  
.....  
query 3' AGGAGGGGAAGAGGAAGGGGU 5'  
query=novel\_mir\_52, target=R03G\_04166, score=3.5, range=636-656,  
strand=-1  
target 5' UCAUCCUCUUCUCCUUCUCCU 3'  
:: .....  
query 3' AGGAGGGGAAGAGGAAGGGGU 5'  
query=novel\_mir\_52, target=R03G\_10079, score=3.5, range=642-662,  
strand=-1  
target 5' UCCUCCUCUUCUUCUUCUCCUCU 3'  
.....  
query 3' AGGAGGGGAAGAGGAAGGGGU 5'  
query=novel\_mir\_52, target=R03G\_14448, score=4, range=532-552,  
strand=1  
target 5' UCUUCUCCUUCUCCUUCUCUU 3'  
.....  
query 3' AGGAGGGGAAGAGGAAGGGGU 5'  
query=novel\_mir\_52, target=R03G\_11208, score=4, range=163-183,  
strand=1  
target 5' UCUUCUGCUUCUUCUUCUCCA 3'  
.....  
query 3' AGGAGGGGAAGAGGAAGGGGU 5'  
query=novel\_mir\_52, target=R03G\_15990, score=4, range=1192-1212,  
strand=1  
target 5' UGUUCUCCUUCUCCUUCUCCU 3'  
: .....  
query 3' AGGAGGGGAAGAGGAAGGGGU 5'

query=novel\_mir\_52, target=R03G\_14668, score=4, range=102-122,  
strand=-1  
target 5' UCUUCCUCUUCUUCUUCCUCU 3'  
:~::~  
query 3' AGGAGGGGAAGAGGAAGGGGU 5'

query=novel\_mir\_52, target=R03G\_09755, score=4, range=2199-2219,  
strand=-1  
target 5' UCUUCCUCUUCUUCUUCCUCU 3'  
:~::~  
query 3' AGGAGGGGAAGAGGAAGGGGU 5'

query=novel\_mir\_52, target=R03G\_17129, score=4, range=2187-2207,  
strand=-1  
target 5' UCUUCCUCUUCUCUUUCCUCU 3'  
:~::~  
query 3' AGGAGGGGAAGAGGAAGGGGU 5'

query=novel\_mir\_52, target=R03G\_09029, score=4, range=2058-2078,  
strand=-1  
target 5' UCUUCCUCUUCUUCUUCUCC 3'  
:~::~  
query 3' AGGAGGGGAAGAGGAAGGGGU 5'

query=novel\_mir\_52, target=R03G\_01975, score=4, range=603-623,  
strand=-1  
target 5' UCUUCUCCUUCUUCUUCUCCUCU 3'  
:~::~  
query 3' AGGAGGGGAAGAGGAAGGGGU 5'

query=novel\_mir\_52, target=R03G\_06877, score=4, range=1269-1289,  
strand=-1  
target 5' UCUUCCUCUUCUUCUUCUCCUCU 3'  
:~::~  
query 3' AGGAGGGGAAGAGGAAGGGGU 5'

query=novel\_mir\_52, target=R03G\_00162, score=4, range=1041-1061,  
strand=-1  
target 5' UCCUCUUCUUCUUCUUCUCCUCU 3'  
:~::~  
query 3' AGGAGGGGAAGAGGAAGGGGU 5'

query=novel\_mir\_52, target=R03G\_01488, score=4, range=615-635,  
strand=-1  
target 5' UCUUCCUCUUCUUCUUCUCCUC 3'  
:~::~  
query 3' AGGAGGGGAAGAGGAAGGGGU 5'

query=novel\_mir\_52, target=R03G\_08412, score=4, range=618-638,  
strand=-1  
target 5' UCUUCCUCUUCUUCUUCUCCUC 3'  
:~::~  
query 3' AGGAGGGGAAGAGGAAGGGGU 5'

query=novel\_mir\_52, target=R03G\_14329, score=4, range=54-74, strand=1  
target 5' UCAUCUUCUUCUUCUUCUCA 3'  
:: :::::::::::::::::::::  
query 3' AGGAGGGGAAGAGGAAGGGGU 5'  
query=novel\_mir\_52, target=R03G\_05754, score=4, range=594-614, strand=-1  
target 5' UCUUCCUCUUCUCCUUCUUCU 3'  
:: :::::::::::::::::::::  
query 3' AGGAGGGGAAGAGGAAGGGGU 5'  
query=novel\_mir\_52, target=R03G\_04370, score=4, range=426-446, strand=-1  
target 5' UCUUCCUCUUCUUCUUCUUCU 3'  
:: :::::::::::::::::::::  
query 3' AGGAGGGGAAGAGGAAGGGGU 5'  
query=novel\_mir\_52, target=R03G\_04712, score=4, range=2625-2645, strand=-1  
target 5' UCCUCGUCUUCUUCUUCUCCUCG 3'  
::::: :::::::::::::::::::::  
query 3' AGGAGGGGAAGAGGAAGGGGU 5'  
query=novel\_mir\_52, target=R03G\_04174, score=4, range=480-500, strand=-1  
target 5' UCCUCUUCUUCUUCUUCUCCUCC 3'  
::::: :::::::::::::::::::::  
query 3' AGGAGGGGAAGAGGAAGGGGU 5'  
query=novel\_mir\_52, target=R03G\_11148, score=4, range=72-92, strand=1  
target 5' UCCUUCUCUUCUUCUUCUCCCC 3'  
::::: :::::::::::::::::::::  
query 3' AGGAGGGGAAGAGGAAGGGGU 5'  
query=novel\_mir\_52, target=R03G\_06602, score=4, range=114-134, strand=-1  
target 5' UCUUCCUCUUCUUCUUCUCCUCU 3'  
:: :::::::::::::::::::::  
query 3' AGGAGGGGAAGAGGAAGGGGU 5'  
query=novel\_mir\_52, target=R03G\_13805, score=4, range=255-275, strand=-1  
target 5' UCCUCUUCUUCUUCUUCUCCUCU 3'  
::::: :::::::::::::::::::::  
query 3' AGGAGGGGAAGAGGAAGGGGU 5'  
query=novel\_mir\_52, target=R03G\_13800, score=4, range=255-275, strand=-1  
target 5' UCCUCUUCUUCUUCUUCUCCUCU 3'  
::::: :::::::::::::::::::::  
query 3' AGGAGGGGAAGAGGAAGGGGU 5'  
query=novel\_mir\_52, target=R03G\_14853, score=4, range=243-263, strand=-1

target 5' UCGUCUUCUUCUUCUUCUCA 3'  
:: .....  
query 3' AGGAGGGGAAGAGGAAGGGGU 5'  
query=novel\_mir\_52, target=R03G\_06986, score=4, range=165-184,  
strand=-1  
target 5' UCC-CUUCUUCUCCUCCUCC 3'  
::: .....  
query 3' AGGAGGGGAAGAGGAAGGGGU 5'  
query=novel\_mir\_52, target=R03G\_08412, score=4, range=597-617,  
strand=-1  
target 5' UCCUCUUCUUCUUCUCCUCU 3'  
:.....  
query 3' AGGAGGGGAAGAGGAAGGGGU 5'  
query=novel\_mir\_15, target=R03G\_12101, score=1.5, range=1003-1024  
strand=1  
target 5' GAAAAGAAGAAGAAGAAGGAGA 3'  
:.....  
query 3' CUUUUCUUUUUCUUUUUCCUCU 5'  
query=novel\_mir\_15, target=R03G\_06159, score=2, range=1402-1423,  
strand=1  
target 5' GAAAAGAAAGAGAAGAAGGAGA 3'  
:.....  
query 3' CUUUUCUUUUUCUUUUUCCUCU 5'  
query=novel\_mir\_15, target=R03G\_13440, score=2, range=790-811,  
strand=1  
target 5' GAAAGGGAAAGGAAAAAGGAGA 3'  
:.....  
query 3' CUUUUCUUUUUCUUUUUCCUCU 5'  
query=novel\_mir\_15, target=R03G\_04457, score=2, range=112-133,  
strand=1  
target 5' GAAAAGAAGGAGAAAAAGGAGG 3'  
:.....  
query 3' CUUUUCUUUUUCUUUUUCCUCU 5'  
query=novel\_mir\_15, target=R03G\_03214, score=2, range=316-337,  
strand=1  
target 5' GAAAAGAAAAGAAAAGGAAA 3'  
:..... :  
query 3' CUUUUCUUUUUCUUUUUCCUCU 5'  
query=novel\_mir\_15, target=R03G\_07351, score=2, range=814-835,  
strand=1  
target 5' GAAAGAGAAAAGAAAAGGAGA 3'  
:..... :  
query 3' CUUUUCUUUUUCUUUUUCCUCU 5'  
query=novel\_mir\_15, target=R03G\_09778, score=2, range=1440-1461,  
strand=1

target 5' GAAAUCAAAAAGAAAAGGAGA 3'  
:::: :  
query 3' CUUUUCUUUUUCUUUUUCCUCU 5'  
query=novel\_mir\_15, target=R03G\_07561, score=2.5, range=175-196,  
strand=1  
target 5' GAGAAGAAAGAGAAGAAGGAGA 3'  
:.  
query 3' CUUUUCUUUUUCUUUUUCCUCU 5'  
query=novel\_mir\_15, target=R03G\_15120, score=2.5, range=445-466,  
strand=1  
target 5' CGAGAGGAAAAGAAAAGGAGA 3'  
..  
query 3' CUUUUCUUUUUCUUUUUCCUCU 5'  
query=novel\_mir\_15, target=R03G\_07217, score=2.5, range=367-388,  
strand=1  
target 5' AAGAAGGAAAAGAAAAGGAGG 3'  
:.  
query 3' CUUUUCUUUUUCUUUUUCCUCU 5'  
query=novel\_mir\_15, target=R03G\_11390, score=2.5, range=274-295,  
strand=1  
target 5' GAAAAGAAGAAGAAAAGAAGA 3'  
:.  
query 3' CUUUUCUUUUUCUUUUUCCUCU 5'  
query=novel\_mir\_15, target=R03G\_15845, score=2.5, range=1531-1552  
strand=1  
target 5' GAAAGGCAAAGGAAAAGGAGA 3'  
:.  
query 3' CUUUUCUUUUUCUUUUUCCUCU 5'  
query=novel\_mir\_15, target=R03G\_11914, score=2.5, range=238-259,  
strand=1  
target 5' GAAAAAGAAGGAAAAGGAGA 3'  
:.  
query 3' CUUUUCUUUUUCUUUUUCCUCU 5'  
query=novel\_mir\_15, target=R03G\_08620, score=3, range=193-214,  
strand=1  
target 5' GAGAAGAAGGAGAAGAAGGAGA 3'  
:.  
query 3' CUUUUCUUUUUCUUUUUCCUCU 5'  
query=novel\_mir\_15, target=R03G\_04550, score=3, range=1217-1238,  
strand=1  
target 5' AAGAAGAAGAAGAAGAAGGAGA 3'  
:.  
query 3' CUUUUCUUUUUCUUUUUCCUCU 5'  
query=novel\_mir\_15, target=R03G\_00983, score=3, range=266-287,  
strand=1



target 5' AAGAAGAAGAAGAAGAAGGAGA 3'  
:.....  
query 3' CUUUUCUUUUUCUUUUUCCUCU 5'  
query=novel\_mir\_15, target=R03G\_11096, score=3, range=2365-2387,  
strand=1  
target 5' GAAAAGAAAAAGCAAGAAGGAGA 3'  
:.....  
query 3' CUUUUCUUUUUC-UUUUUCCUCU 5'  
query=novel\_mir\_15, target=R03G\_11135, score=3, range=217-238,  
strand=1  
target 5' GAAAAGAAGAAUAAAAAGGAGG 3'  
:.....  
query 3' CUUUUCUUUUUCUUUUUCCUCU 5'  
query=novel\_mir\_15, target=R03G\_05857, score=3, range=43-64, stra  
target 5' GAAAAGAAGAAGAAAAAGAAGG 3'  
:.....  
query 3' CUUUUCUUUUUCUUUUUCCUCU 5'  
query=novel\_mir\_15, target=R03G\_14544, score=3, range=1243-1265,  
strand=1  
target 5' GAAGACGAAGAAGAAGAAGGAGA 3'  
:.....  
query 3' CUUUU-CUUUUUCUUUUUCCUCU 5'  
query=novel\_mir\_15, target=R03G\_13511, score=3, range=218-239,  
strand=1  
target 5' GUGAAGAAGAAGAAGAAGGAGA 3'  
:.....  
query 3' CUUUUCUUUUUCUUUUUCCUCU 5'  
query=novel\_mir\_15, target=R03G\_07923, score=3, range=572-593,  
strand=1  
target 5' AAAAAGAAAAACAAAAAGGAGA 3'  
:.....  
query 3' CUUUUCUUUUUCUUUUUCCUCU 5'  
query=novel\_mir\_15, target=R03G\_07173, score=3, range=82-104, str  
target 5' GAAAAGAAAGAAGGAAAAGGAGC 3'  
:.....  
query 3' CUUUUCUUU-UUCUUUUUCCUCU 5'  
query=novel\_mir\_15, target=R03G\_03488, score=3, range=1633-1653,  
strand=1  
target 5' GAGAAGAAGAAGAAAAA-GAGA 3'  
:.....  
query 3' CUUUUCUUUUUCUUUUUCCUCU 5'  
query=novel\_mir\_15, target=R03G\_10586, score=3, range=115-136,  
strand=1  
target 5' GCAGUGGAAAAGAAAAAGGAGA 3'  
: .. :.....

query 3' CUUUUCUUUUUCUUUUUCCUCU 5'  
query=novel\_mir\_15, target=R03G\_04404, score=3, range=943-964,  
strand=1  
target 5' GUAGAAAAGAAGAAAAGGAGA 3'  
: :: ::::::::::::::::::::  
query 3' CUUUUCUUUUUCUUUUUCCUCU 5'  
query=novel\_mir\_15, target=R03G\_00993, score=3, range=571-592,  
strand=1  
target 5' GAUAAGAAAAGAAAAGAAGA 3'  
:: :::::::::::::::::::: :::  
query 3' CUUUUCUUUUUCUUUUUCCUCU 5'  
query=novel\_mir\_15, target=R03G\_11149, score=3, range=34-55, stra  
target 5' GAAAAAAAAAAGAAAAAGAGA 3'  
::::: :::::::::::::::::::: ::::  
query 3' CUUUUCUUUUUCUUUUUCCUCU 5'  
query=novel\_mir\_15, target=R03G\_15565, score=3.5, range=688-709,  
strand=1  
target 5' GAAAAGAAGAAGAAGAGGGAGC 3'  
::::::::::::::::::::::::::  
query 3' CUUUUCUUUUUCUUUUUCCUCU 5'  
query=novel\_mir\_15, target=R03G\_06674, score=3.5, range=335-356,  
strand=1  
target 5' UAAGAGAAAAGGAAGAAGGAGA 3'  
::::::::::::::::::::::::::  
query 3' CUUUUCUUUUUCUUUUUCCUCU 5'  
query=novel\_mir\_15, target=R03G\_11418, score=3.5, range=1442-1463  
strand=1  
target 5' GAAAAGAGAAAGAAAGAGAAGA 3'  
:::::::::::::::::::::::::: :::  
query 3' CUUUUCUUUUUCUUUUUCCUCU 5'  
query=novel\_mir\_15, target=R03G\_05103, score=3.5, range=1103-1124  
strand=1  
target 5' GAAAAGAAGAAGAAAAGGGACA 3'  
:::::::::::::::::::::::::: :  
query 3' CUUUUCUUUUUCUUUUUCCUCU 5'  
query=novel\_mir\_15, target=R03G\_04274, score=3.5, range=1024-1045  
strand=1  
target 5' GAAAAGAAAAGAAAGAAGAAGG 3'  
:::::::::::::::::::::::::: ::.  
query 3' CUUUUCUUUUUCUUUUUCCUCU 5'  
query=novel\_mir\_15, target=R03G\_15554, score=3.5, range=497-518,  
strand=1  
target 5' GAGAAGAAAAGAAAGAGAAGA 3'  
:::::::::::::::::::::::::: :::  
query 3' CUUUUCUUUUUCUUUUUCCUCU 5'



query=novel\_mir\_15, target=R03G\_00529, score=3.5, range=1073-1094  
strand=1  
target 5' GAAGAGAAAAGAAAAGAAGU 3'  
:::.....: :  
query 3' CUUUUCUUUUUCUUUUUCCUCU 5'  
query=novel\_mir\_15, target=R03G\_15117, score=3.5, range=26-47,  
strand=1  
target 5' CAAAAGAGAAAAGAAAAGGAAA 3'  
:.....: :  
query 3' CUUUUCUUUUUCUUUUUCCUCU 5'  
query=novel\_mir\_15, target=R03G\_15706, score=3.5, range=514-535,  
strand=1  
target 5' GAUCAGAAAAGAAGAAGGAGG 3'  
:: :.....:  
query 3' CUUUUCUUUUUCUUUUUCCUCU 5'  
query=novel\_mir\_15, target=R03G\_09672, score=3.5, range=22-44,  
strand=1  
target 5' GGAAAGAAAGAAGAAAAGAAGA 3'  
:.....: : : :  
query 3' CUUUUCUUU-UUCUUUUUCCUCU 5'  
query=novel\_mir\_15, target=R03G\_02549, score=3.5, range=214-236,  
strand=1  
target 5' GAAACAGAAGAAGAAAAGAAGA 3'  
: : : : :.....: : : :  
query 3' CUUU-UCUUUUUCUUUUUCCUCU 5'  
query=novel\_mir\_15, target=R03G\_08748, score=3.5, range=385-406,  
strand=1  
target 5' GAAGAAAAAAGAAAAGAAGA 3'  
: : : : : :.....: : : :  
query 3' CUUUUCUUUUUCUUUUUCCUCU 5'  
query=novel\_mir\_15, target=R03G\_04831, score=3.5, range=1370-1390  
strand=1  
target 5' UAAAAGAAGAAG-AAAAGGAGA 3'  
: : : : : :.....: : : : :  
query 3' CUUUUCUUUUUCUUUUUCCUCU 5'  
query=novel\_mir\_15, target=R03G\_03207, score=3.5, range=169-190,  
strand=1  
target 5' GAAGCGAAAAGAAAAGAAGA 3'  
: : : . :.....: : : :  
query 3' CUUUUCUUUUUCUUUUUCCUCU 5'  
query=novel\_mir\_15, target=R03G\_04313, score=3.5, range=184-204,  
strand=1  
target 5' AAAAGAAGAAGAAAAA-GAGA 3'  
: : : : : :.....: : : : :  
query 3' CUUUUCUUUUUCUUUUUCCUCU 5'

query=novel\_mir\_15, target=R03G\_15702, score=3.5, range=202-222,  
strand=1  
target 5' CAAGAGAAAAGAAAAA-GAGA 3'  
:.....: :  
query 3' CUUUUCUUUUUCUUUUUCCUCU 5'  
query=novel\_mir\_15, target=R03G\_00824, score=3.5, range=510-530,  
strand=1  
target 5' GAAGAG-AAAAGAAAAGGAAA 3'  
:.....: :  
query 3' CUUUUCUUUUUCUUUUUCCUCU 5'  
query=novel\_mir\_15, target=R03G\_17074, score=3.5, range=142-163,  
strand=1  
target 5' GAAAAGAAAGAGAAAAGAAGG 3'  
:.....: :.  
query 3' CUUUUCUUUUUCUUUUUCCUCU 5'  
query=novel\_mir\_15, target=R03G\_07178, score=3.5, range=1273-1294  
strand=-1  
target 5' AAGAAGAAAGAGAAGAAGGAGA 3'  
:.....: :  
query 3' CUUUUCUUUUUCUUUUUCCUCU 5'  
query=novel\_mir\_15, target=R03G\_13980, score=3.5, range=1261-1282  
strand=-1  
target 5' GACAAGAGAAAGAAAAGCAGA 3'  
: :.....: :  
query 3' CUUUUCUUUUUCUUUUUCCUCU 5'  
query=novel\_mir\_15, target=R03G\_15034, score=4, range=1378-1399,  
strand=1  
target 5' GAAAAGAAAGAGAAGAAGGAAA 3'  
:.....: :  
query 3' CUUUUCUUUUUCUUUUUCCUCU 5'  
query=novel\_mir\_15, target=R03G\_09019, score=4, range=17-38, stra  
target 5' GAGGAGAAAAGAAAAGGAAGA 3'  
:.....: :  
query 3' CUUUUCUUUUUCUUUUUCCUCU 5'  
query=novel\_mir\_15, target=R03G\_08165, score=4, range=718-739,  
strand=1  
target 5' GAAAAGAAAGAGAAAGAGGAAA 3'  
:.....: :  
query 3' CUUUUCUUUUUCUUUUUCCUCU 5'  
query=novel\_mir\_15, target=R03G\_09426, score=4, range=1682-1703,  
strand=1  
target 5' GAAGAGGAAAAGAAGAAGUAGA 3'  
:.....: :  
query 3' CUUUUCUUUUUCUUUUUCCUCU 5'  
query=novel\_mir\_15, target=R03G\_10605, score=4, range=88-109, str





target 5' AAAAGGAAGAAGAAAAGAAGA 3'  
:::.....: :::  
query 3' CUUUUCUUUUUCUUUUUCCUCU 5'  
query=novel\_mir\_15, target=R03G\_05321, score=4, range=1095-1117,  
strand=1  
target 5' AAAGAGCGAAAAGGAAAAGGAGA 3'  
:::..: .....: :::  
query 3' CUUUUC-UUUUUCUUUUUCCUCU 5'  
query=novel\_mir\_15, target=R03G\_07072, score=4, range=437-458,  
strand=1  
target 5' AAAAGGAAGAAGAAAAGAAGA 3'  
:::.....: :::  
query 3' CUUUUCUUUUUCUUUUUCCUCU 5'  
query=novel\_mir\_15, target=R03G\_15727, score=4, range=169-190,  
strand=1  
target 5' GGAAAAAAGAAGAAAAGGAAA 3'  
:.....: .....: :  
query 3' CUUUUCUUUUUCUUUUUCCUCU 5'  
query=novel\_mir\_15, target=R03G\_13255, score=4, range=197-218,  
strand=1  
target 5' AAGAAGAAGAAGAACAAGGAGA 3'  
:.....: .....: :  
query 3' CUUUUCUUUUUCUUUUUCCUCU 5'  
query=novel\_mir\_15, target=R03G\_10412, score=4, range=580-601,  
strand=1  
target 5' GAAAAGAAAAGAAUAAGGAAA 3'  
:.....: .....: :  
query 3' CUUUUCUUUUUCUUUUUCCUCU 5'  
query=novel\_mir\_15, target=R03G\_01819, score=4, range=1282-1303,  
strand=1  
target 5' GAAAGAGAAAAGAAAAGGACA 3'  
:.....: .....: :  
query 3' CUUUUCUUUUUCUUUUUCCUCU 5'  
query=novel\_mir\_15, target=R03G\_01918, score=4, range=771-792,  
strand=1  
target 5' GAUAACAAAAGGAAGAAGGGGA 3'  
:: :: :.....: .....: :  
query 3' CUUUUCUUUUUCUUUUUCCUCU 5'  
query=novel\_mir\_15, target=R03G\_03921, score=4, range=1801-1822,  
strand=1  
target 5' GAAGUAAAGGAGAAAAGGAGA 3'  
:.....: .....: :  
query 3' CUUUUCUUUUUCUUUUUCCUCU 5'  
query=novel\_mir\_15, target=R03G\_06459, score=4, range=136-158,  
strand=1







```
::::: :::::::::::::: :::
query 3' CUUUUCUUUUUCUUUUUCCUCU 5'
query=novel_mir_15, target=R03G_16098, score=4, range=1105-1126,
strand=-1
target 5' GAGAAGAAGAACAAGAAGGAGA 3'
::::: ::::::::::::::
query 3' CUUUUCUUUUUCUUUUUCCUCU 5'
query=novel_mir_15, target=R03G_12967, score=4, range=871-892,
strand=-1
target 5' GAGAAGCAAAGAAGAAGGGGG 3'
::::: ::::::::::::::
query 3' CUUUUCUUUUUCUUUUUCCUCU 5'
query=novel_mir_15, target=R03G_07736, score=4, range=871-892,
strand=-1
target 5' GAGAAGCAAAGAAGAAGGGGG 3'
::::: ::::::::::::::
query 3' CUUUUCUUUUUCUUUUUCCUCU 5'
query=novel_mir_15, target=R03G_16358, score=4, range=700-721,
strand=-1
target 5' GAGAAGCAAAGAAGAAGGGGG 3'
::::: ::::::::::::::
query 3' CUUUUCUUUUUCUUUUUCCUCU 5'
query=novel_mir_67, target=R03G_07834, score=0, range=1150-1171,
strand=1
target 5' AAGUCUGAAAGAAGCCGUGUA 3'
::::: ::::::::::::::
query 3' UUCAGACUUUCUUCGGCGACAU 5'
query=novel_mir_67, target=R03G_08467, score=1, range=790-811,
strand=1
target 5' AAGUCUGAAAGAAGUCGUGUA 3'
::::: ::::::::::::::
query 3' UUCAGACUUUCUUCGGCGACAU 5'
query=novel_mir_122, target=R03G_16618, score=0, range=2263-2282,
strand=1
target 5' CAACAGCAGCAGCAGAUGCA 3'
::::: ::::::::::::::
query 3' GUUGUCGUCGUCGUCUACGU 5'
query=novel_mir_122, target=R03G_00202, score=0, range=581-600,
strand=1
target 5' CAACAGCAGCAGCAGAUGCA 3'
::::: ::::::::::::::
query 3' GUUGUCGUCGUCGUCUACGU 5'
query=novel_mir_122, target=R03G_01848, score=2, range=75-94,
strand=-1
target 5' GAGUAGCAGCAGCAGAUGCA 3'
```

```
.....:
query 3' GUUGUCGUCGUCGUCUACGU 5'
query=novel_mir_122, target=R03G_01884, score=2, range=75-94,
strand=-1
target 5' GAGUAGCAGCAGCAGAUGCA 3'
.....:
query 3' GUUGUCGUCGUCGUCUACGU 5'
query=novel_mir_122, target=R03G_16322, score=2.5, range=790-809,
strand=1
target 5' CAACAGCAGCAGCAGAAGCG 3'
.....:
query 3' GUUGUCGUCGUCGUCUACGU 5'
query=novel_mir_122, target=R03G_04003, score=2.5, range=1879-189
strand=1
target 5' CAGCAGCAGCAGCAGAUUCA 3'
.....:
query 3' GUUGUCGUCGUCGUCUACGU 5'
query=novel_mir_122, target=R03G_13611, score=2.5, range=746-764,
strand=1
target 5' CAGCAGCAGCAGCAGA-GCA 3'
.....:
query 3' GUUGUCGUCGUCGUCUACGU 5'
query=novel_mir_122, target=R03G_04553, score=2.5, range=894-913,
strand=-1
target 5' CAGCAGCAGCAGCAGGUGUA 3'
.....:
query 3' GUUGUCGUCGUCGUCUACGU 5'
query=novel_mir_122, target=R03G_07798, score=2.5, range=252-271,
strand=-1
target 5' CAGCAGCAGCAGCAGAAGCA 3'
.....:
query 3' GUUGUCGUCGUCGUCUACGU 5'
query=novel_mir_122, target=R03G_05072, score=3, range=412-432,
strand=1
target 5' CAAUGGCAAGCAGUAGAUGCA 3'
.....:
query 3' GUUGUCG-UCGUCGUCUACGU 5'
query=novel_mir_122, target=R03G_01092, score=3, range=463-482,
strand=1
target 5' CAACAACAACAGCAGAUGCA 3'
.....:
query 3' GUUGUCGUCGUCGUCUACGU 5'
query=novel_mir_122, target=R03G_04444, score=3, range=1033-1051,
strand=1
target 5' AAACAGCAGCAGCAGAU-CA 3'
```

```
..... ::
query 3' GUUGUCGUCGUCGUCUACGU 5'
query=novel_mir_122, target=R03G_13435, score=3, range=78-97,
strand=-1
target 5' CAGCAGUAGCAGUAGAUGUA 3'
.....:
query 3' GUUGUCGUCGUCGUCUACGU 5'
query=novel_mir_122, target=R03G_09454, score=3, range=6501-6520,
strand=-1
target 5' UAAGGGCAGCAGCAGAUGUA 3'
.:: .....:
query 3' GUUGUCGUCGUCGUCUACGU 5'
query=novel_mir_122, target=R03G_02187, score=3, range=1159-1177,
strand=-1
target 5' CAACAGCAGCAGCAGA-GCU 3'
.....: ::
query 3' GUUGUCGUCGUCGUCUACGU 5'
query=novel_mir_122, target=R03G_07862, score=3, range=456-474,
strand=-1
target 5' CAA-AGGAGCAGCGGAUGCA 3'
::: :: .....:
query 3' GUUGUCGUCGUCGUCUACGU 5'
query=novel_mir_122, target=R03G_11979, score=3, range=456-474,
strand=-1
target 5' CAA-AGGAGCAGCGGAUGCA 3'
::: :: .....:
query 3' GUUGUCGUCGUCGUCUACGU 5'
query=novel_mir_122, target=R03G_10532, score=3, range=342-360,
strand=-1
target 5' CAA-AGGAGCAGCGGAUGCA 3'
::: :: .....:
query 3' GUUGUCGUCGUCGUCUACGU 5'
query=novel_mir_122, target=R03G_10747, score=3, range=456-474,
strand=-1
target 5' CAA-AGGAGCAGCGGAUGCA 3'
::: :: .....:
query 3' GUUGUCGUCGUCGUCUACGU 5'
query=novel_mir_122, target=R03G_17218, score=3, range=342-360,
strand=-1
target 5' CAA-AGGAGCAGCGGAUGCA 3'
::: :: .....:
query 3' GUUGUCGUCGUCGUCUACGU 5'
query=novel_mir_122, target=R03G_10746, score=3, range=810-828,
strand=-1
target 5' CAA-AGGAGCAGCGGAUGCA 3'
```

::: :: :::::::::::::::  
query 3' GUUGUCGUCGUCGUCUACGU 5'  
query=novel\_mir\_122, target=R03G\_04733, score=3.5, range=1291-131  
strand=1  
target 5' CAGCAGCAGCAGCAGGUGGA 3'  
:::::::::::::::::: :  
query 3' GUUGUCGUCGUCGUCUACGU 5'  
query=novel\_mir\_122, target=R03G\_15840, score=3.5, range=6036-605  
strand=1  
target 5' UAACAGCAGCAGCGGAUCGCA 3'  
.:::::::::::::::::: :::  
query 3' GUUGUCGUCGUCGUCUA-CGU 5'  
query=novel\_mir\_122, target=R03G\_00640, score=3.5, range=1240-126  
strand=1  
target 5' CAGCAGCAGCAGCAGAUGAUA 3'  
:::::::::::::::::: .:  
query 3' GUUGUCGUCGUCGUCUAC-GU 5'  
query=novel\_mir\_122, target=R03G\_12743, score=3.5, range=565-584,  
strand=1  
target 5' GAGCAGCAGCAGCAGAUUCA 3'  
:::::::::::::::::: ::  
query 3' GUUGUCGUCGUCGUCUACGU 5'  
query=novel\_mir\_122, target=R03G\_05425, score=3.5, range=346-365,  
strand=1  
target 5' CUGCAGCAGCAGCAGAAGCA 3'  
: .:::::::::::::::::: :::  
query 3' GUUGUCGUCGUCGUCUACGU 5'  
query=novel\_mir\_122, target=R03G\_11464, score=3.5, range=622-641,  
strand=1  
target 5' CGUGAGCAGCAGCAGAUGCU 3'  
:. ::::::::::::::::::::  
query 3' GUUGUCGUCGUCGUCUACGU 5'  
query=novel\_mir\_122, target=R03G\_07350, score=3.5, range=444-462,  
strand=1  
target 5' UAA-AGAAGCAGCAGAUGCU 3'  
.:: :: ::::::::::::::::::::  
query 3' GUUGUCGUCGUCGUCUACGU 5'  
query=novel\_mir\_122, target=R03G\_13438, score=3.5, range=360-378,  
strand=1  
target 5' UAA-AGAAGCAGCAGAUGCU 3'  
.:: :: ::::::::::::::::::::  
query 3' GUUGUCGUCGUCGUCUACGU 5'  
query=novel\_mir\_122, target=R03G\_13835, score=3.5, range=15879-15  
strand=-1  
target 5' CAAUAGCGGCAGCAGCUGCA 3'

```

..... :
query 3' GUUGUCGUCGUCGUCUACGU 5'
query=novel_mir_122, target=R03G_11504, score=3.5, range=213-232,
strand=-1
target 5' CAGCAGCAGCAGCAGGAGCA 3'
..... :
query 3' GUUGUCGUCGUCGUCUACGU 5'
query=novel_mir_122, target=R03G_02764, score=3.5, range=213-232,
strand=-1
target 5' CAGCAGCAGCAGCAGGAGCA 3'
..... :
query 3' GUUGUCGUCGUCGUCUACGU 5'
query=novel_mir_122, target=R03G_00441, score=3.5, range=399-418,
strand=-1
target 5' UGGCAGCAGCAGCAGAUACA 3'
..... :
query 3' GUUGUCGUCGUCGUCUACGU 5'
query=novel_mir_122, target=R03G_10654, score=3.5, range=276-295,
strand=-1
target 5' UGGGAGCAGCAGCAGGUGCA 3'
... :
query 3' GUUGUCGUCGUCGUCUACGU 5'
query=novel_mir_122, target=R03G_05454, score=3.5, range=519-538,
strand=-1
target 5' GAGCAGCAGCAGCAGAUUCA 3'
..... :
query 3' GUUGUCGUCGUCGUCUACGU 5'
query=novel_mir_122, target=R03G_08883, score=3.5, range=525-544,
strand=-1
target 5' UAACAGGAGGAGCAGAUGCA 3'
..... :
query 3' GUUGUCGUCGUCGUCUACGU 5'
query=novel_mir_122, target=R03G_05422, score=3.5, range=2-20,
strand=-1
target 5' UGA-AGUAGCAGCAGGUGCA 3'
... :
query 3' GUUGUCGUCGUCGUCUACGU 5'
query=novel_mir_122, target=R03G_16410, score=3.5, range=513-532,
strand=-1
target 5' CGAAACCAGCAGCAGAUGCC 3'
... :
query 3' GUUGUCGUCGUCGUCUACGU 5'
query=novel_mir_122, target=R03G_13835, score=3.5, range=8676-869
strand=-1
target 5' CAAUGGUAGCAGCAGAUUCA 3'

```

```
.....: :
query 3' GUUGUCGUCGUCGUCUACGU 5'
query=novel_mir_122, target=R03G_03416, score=4, range=881-900,
strand=1
target 5' GAACAGCAGCACUAGAUGCA 3'
.....: :
query 3' GUUGUCGUCGUCGUCUACGU 5'
query=novel_mir_122, target=R03G_06631, score=4, range=2974-2993,
strand=1
target 5' CAACAGCAGCAGCAGCAGCA 3'
.....: :
query 3' GUUGUCGUCGUCGUCUACGU 5'
query=novel_mir_122, target=R03G_01899, score=4, range=70-89, str
target 5' CAACAGCAGCAGCAGCAGCA 3'
.....: :
query 3' GUUGUCGUCGUCGUCUACGU 5'
query=novel_mir_122, target=R03G_05230, score=4, range=3520-3539,
strand=1
target 5' CAACAGCAGCAGCAGCAGCA 3'
.....: :
query 3' GUUGUCGUCGUCGUCUACGU 5'
query=novel_mir_122, target=R03G_16404, score=4, range=658-677,
strand=1
target 5' CAACAGCAGCAGCAGCAGCA 3'
.....: :
query 3' GUUGUCGUCGUCGUCUACGU 5'
query=novel_mir_122, target=R03G_10396, score=4, range=412-431,
strand=1
target 5' CAACAGCAGCAGCAGCAGCA 3'
.....: :
query 3' GUUGUCGUCGUCGUCUACGU 5'
query=novel_mir_122, target=R03G_07466, score=4, range=1741-1760,
strand=1
target 5' CAACAGCAGCAGCAGCAGCA 3'
.....: :
query 3' GUUGUCGUCGUCGUCUACGU 5'
query=novel_mir_122, target=R03G_09029, score=4, range=2332-2351,
strand=1
target 5' CAACAGCAGCAGCAGCAGCA 3'
.....: :
query 3' GUUGUCGUCGUCGUCUACGU 5'
query=novel_mir_122, target=R03G_10815, score=4, range=2581-2600,
strand=1
target 5' CAACAGCAGCAGCAGCAGCA 3'
.....: :
```



query 3' GUUGUCGUCGUCGUCUACGU 5'  
query=novel\_mir\_122, target=R03G\_05396, score=4, range=1351-1370,  
strand=1  
target 5' CAACAGCAGCAGCAGCAGCA 3'  
:::::::::::::::::: :::  
query 3' GUUGUCGUCGUCGUCUACGU 5'  
query=novel\_mir\_122, target=R03G\_04562, score=4, range=2209-2228,  
strand=1  
target 5' CAACAGCAGCAGCAGCAGCA 3'  
:::::::::::::::::: :::  
query 3' GUUGUCGUCGUCGUCUACGU 5'  
query=novel\_mir\_122, target=R03G\_11868, score=4, range=1645-1664,  
strand=1  
target 5' CAACAGCAGCAGCAGCAGCA 3'  
:::::::::::::::::: :::  
query 3' GUUGUCGUCGUCGUCUACGU 5'  
query=novel\_mir\_122, target=R03G\_12904, score=4, range=820-839,  
strand=1  
target 5' CAACAGCAGCAGCAGCAGCA 3'  
:::::::::::::::::: :::  
query 3' GUUGUCGUCGUCGUCUACGU 5'  
query=novel\_mir\_122, target=R03G\_11158, score=4, range=55-74, str  
target 5' CAACAGCAGCAGCAGCAGCA 3'  
:::::::::::::::::: :::  
query 3' GUUGUCGUCGUCGUCUACGU 5'  
query=novel\_mir\_122, target=R03G\_09085, score=4, range=802-821,  
strand=1  
target 5' CAACAGCAGCAGCAGCAGCA 3'  
:::::::::::::::::: :::  
query 3' GUUGUCGUCGUCGUCUACGU 5'  
query=novel\_mir\_122, target=R03G\_04522, score=4, range=1546-1565,  
strand=1  
target 5' CAACAGCAGCAGCAGACACA 3'  
:::::::::::::::::: ::  
query 3' GUUGUCGUCGUCGUCUACGU 5'  
query=novel\_mir\_122, target=R03G\_10851, score=4, range=337-356,  
strand=1  
target 5' CAACAGCAGCAGCAGCAGCA 3'  
:::::::::::::::::: :::  
query 3' GUUGUCGUCGUCGUCUACGU 5'  
query=novel\_mir\_122, target=R03G\_01361, score=4, range=460-479,  
strand=1  
target 5' CAACAGCAGCAGCAGCAGCA 3'  
:::::::::::::::::: :::  
query 3' GUUGUCGUCGUCGUCUACGU 5'

query=novel\_mir\_122, target=R03G\_02027, score=4, range=634-653,  
strand=1  
target 5' CAACAGCAGCAGCAGCAGCA 3'  
:::::::::::::::::: :::  
query 3' GUUGUCGUCGUCGUCUACGU 5'  
query=novel\_mir\_122, target=R03G\_10831, score=4, range=1090-1109,  
strand=1  
target 5' CAACAGCAGCAGCAGCAGCA 3'  
:::::::::::::::::: :::  
query 3' GUUGUCGUCGUCGUCUACGU 5'  
query=novel\_mir\_122, target=R03G\_07933, score=4, range=418-437,  
strand=1  
target 5' CAACAGCAGCAGCAGCAGCA 3'  
:::::::::::::::::: :::  
query 3' GUUGUCGUCGUCGUCUACGU 5'  
query=novel\_mir\_122, target=R03G\_15357, score=4, range=1055-1074,  
strand=1  
target 5' CAACAGCAGCAGCAGCAGCA 3'  
:::::::::::::::::: :::  
query 3' GUUGUCGUCGUCGUCUACGU 5'  
query=novel\_mir\_122, target=R03G\_06238, score=4, range=730-749,  
strand=1  
target 5' CAACAGCAGCAGCAGCAGCA 3'  
:::::::::::::::::: :::  
query 3' GUUGUCGUCGUCGUCUACGU 5'  
query=novel\_mir\_122, target=R03G\_00357, score=4, range=379-398,  
strand=1  
target 5' CAACAGCAGCAGCAGCAGCA 3'  
:::::::::::::::::: :::  
query 3' GUUGUCGUCGUCGUCUACGU 5'  
query=novel\_mir\_122, target=R03G\_05582, score=4, range=775-794,  
strand=1  
target 5' CAACAGCAGCAGCAGCAGCA 3'  
:::::::::::::::::: :::  
query 3' GUUGUCGUCGUCGUCUACGU 5'  
query=novel\_mir\_122, target=R03G\_02252, score=4, range=331-350,  
strand=1  
target 5' CAACAGCAGCAGCAGCAGCA 3'  
:::::::::::::::::: :::  
query 3' GUUGUCGUCGUCGUCUACGU 5'  
query=novel\_mir\_122, target=R03G\_02518, score=4, range=520-539,  
strand=1  
target 5' CAACAGCAGCAGCAGCAGCA 3'  
:::::::::::::::::: :::  
query 3' GUUGUCGUCGUCGUCUACGU 5'

query=novel\_mir\_122, target=R03G\_09721, score=4, range=601-620,  
strand=1  
target 5' CAACAGCAGCAGCAGCAGCA 3'  
:::::::::::::::::: :::  
query 3' GUUGUCGUCGUCGUCUACGU 5'  
query=novel\_mir\_122, target=R03G\_06665, score=4, range=727-746,  
strand=1  
target 5' CAACAGCAGCAGCAGCAGCA 3'  
:::::::::::::::::: :::  
query 3' GUUGUCGUCGUCGUCUACGU 5'  
query=novel\_mir\_122, target=R03G\_13648, score=4, range=718-737,  
strand=1  
target 5' CAACAGCAGCAGCAGAGUCA 3'  
:::::::::::::::::: ::  
query 3' GUUGUCGUCGUCGUCUACGU 5'  
query=novel\_mir\_122, target=R03G\_04604, score=4, range=132-151,  
strand=1  
target 5' CAACAGCAGCAGCAGCAGCA 3'  
:::::::::::::::::: :::  
query 3' GUUGUCGUCGUCGUCUACGU 5'  
query=novel\_mir\_122, target=R03G\_16262, score=4, range=159-178,  
strand=1  
target 5' CAACAGCAGCAGCAGCAGCA 3'  
:::::::::::::::::: :::  
query 3' GUUGUCGUCGUCGUCUACGU 5'  
query=novel\_mir\_122, target=R03G\_00028, score=4, range=373-392,  
strand=1  
target 5' CAACAGCAGCAGCAGCAGCA 3'  
:::::::::::::::::: :::  
query 3' GUUGUCGUCGUCGUCUACGU 5'  
query=novel\_mir\_122, target=R03G\_03857, score=4, range=421-440,  
strand=1  
target 5' CAACAGCAGCAGCAGCAGCA 3'  
:::::::::::::::::: :::  
query 3' GUUGUCGUCGUCGUCUACGU 5'  
query=novel\_mir\_122, target=R03G\_01791, score=4, range=170-189,  
strand=1  
target 5' CAACAGCAGCAGCAGCAGCA 3'  
:::::::::::::::::: :::  
query 3' GUUGUCGUCGUCGUCUACGU 5'  
query=novel\_mir\_122, target=R03G\_00501, score=4, range=103-122,  
strand=1  
target 5' CAACAGCAGCAGCAGCAGCA 3'  
:::::::::::::::::: :::  
query 3' GUUGUCGUCGUCGUCUACGU 5'

```

query=novel_mir_122, target=R03G_08774, score=4, range=226-245,
strand=1
target 5' CAACAGCAGCAGCAGCAGCA 3'
:::::::::::::::::::: ::
query 3' GUUGUCGUCGUCGUCUACGU 5'
query=novel_mir_122, target=R03G_06599, score=4, range=382-401,
strand=1
target 5' CAACAGCAGCAGCAGCAGCA 3'
:::::::::::::::::::: ::
query 3' GUUGUCGUCGUCGUCUACGU 5'
query=novel_mir_122, target=R03G_14274, score=4, range=226-245,
strand=1
target 5' CAACAGCAGCAGCAGCAGCA 3'
:::::::::::::::::::: ::
query 3' GUUGUCGUCGUCGUCUACGU 5'
query=novel_mir_122, target=R03G_07234, score=4, range=292-311,
strand=1
target 5' CAACAGCAGCAGCAGCAGCA 3'
:::::::::::::::::::: ::
query 3' GUUGUCGUCGUCGUCUACGU 5'
query=novel_mir_122, target=R03G_06990, score=4, range=292-311,
strand=1
target 5' CAACAGCAGCAACAGCUGCA 3'
:::::::::::: :: ::
query 3' GUUGUCGUCGUCGUCUACGU 5'
query=novel_mir_122, target=R03G_00729, score=4, range=940-959,
strand=1
target 5' CAACAGCAGCAGCAGCAGCA 3'
:::::::::::::::::::: ::
query 3' GUUGUCGUCGUCGUCUACGU 5'
query=novel_mir_122, target=R03G_05007, score=4, range=1397-1416,
strand=1
target 5' CUACAGCAGCAGCGGAUGAA 3'
: :::::::::::::: ::
query 3' GUUGUCGUCGUCGUCUACGU 5'
query=novel_mir_122, target=R03G_11323, score=4, range=1666-1686,
strand=1
target 5' CGACAGUUGCAGCAGAAUGCA 3'
:..... :::::: ::::::
query 3' GUUGUCGUCGUCGUC-UACGU 5'
query=novel_mir_122, target=R03G_14125, score=4, range=23-41, str
target 5' CGGCAGCAGCAGCAGA-GCC 3'
:..... ::
query 3' GUUGUCGUCGUCGUCUACGU 5'
query=novel_mir_122, target=R03G_05683, score=4, range=377-395,

```

strand=1  
target 5' CAACA-CAGCAGCAGAUGGU 3'  
::::: :::::::::::::::  
query 3' GUUGUCGUCGUCGUCUACGU 5'  
query=novel\_mir\_122, target=R03G\_10401, score=4, range=1795-1814,  
strand=1  
target 5' CUACAACAGCAGCAAUGCA 3'  
: ::: ::::::::::: ::::::  
query 3' GUUGUCGUCGUCGUCUACGU 5'  
query=novel\_mir\_122, target=R03G\_09692, score=4, range=539-558,  
strand=1  
target 5' CAACCCCAGCUGCAGAUGCA 3'  
::::: ::::: ::::::::::::::  
query 3' GUUGUCGUCGUCGUCUACGU 5'  
query=novel\_mir\_122, target=R03G\_01472, score=4, range=1204-1222,  
strand=1  
target 5' CAACAGCAGCAGCA-AAGCA 3'  
::::::::::::::::::: : :::  
query 3' GUUGUCGUCGUCGUCUACGU 5'  
query=novel\_mir\_122, target=R03G\_03490, score=4, range=427-446,  
strand=1  
target 5' CAAGAACAACAGCAGAUGCA 3'  
::: : :: :::::::::::::::  
query 3' GUUGUCGUCGUCGUCUACGU 5'  
query=novel\_mir\_122, target=R03G\_00640, score=4, range=1342-1361,  
strand=1  
target 5' CAACAGCAGCAGCAGCAGCA 3'  
::::::::::::::::::: :::  
query 3' GUUGUCGUCGUCGUCUACGU 5'  
query=novel\_mir\_122, target=R03G\_07933, score=4, range=346-365,  
strand=1  
target 5' CAACAGCAGCAGCAGCAGCA 3'  
::::::::::::::::::: :::  
query 3' GUUGUCGUCGUCGUCUACGU 5'  
query=novel\_mir\_122, target=R03G\_00640, score=4, range=1318-1337,  
strand=1  
target 5' CAACAGCAGCAGCAGCAGCA 3'  
::::::::::::::::::: :::  
query 3' GUUGUCGUCGUCGUCUACGU 5'  
query=novel\_mir\_122, target=R03G\_16171, score=4, range=6570-6589,  
strand=-1  
target 5' CAGCAGCAGCAGCAGGAGCG 3'  
::::::::::::::::::: ::.  
query 3' GUUGUCGUCGUCGUCUACGU 5'  
query=novel\_mir\_122, target=R03G\_12622, score=4, range=864-883,



strand=-1  
target 5' CAACAGCAGCAGCAGCAGCA 3'  
:::::::::::::::::: :::  
query 3' GUUGUCGUCGUCGUCUACGU 5'  
query=novel\_mir\_122, target=R03G\_07468, score=4, range=90-109,  
strand=-1  
target 5' CAACAGCAGCAGCAGCAGCA 3'  
:::::::::::::::::: :::  
query 3' GUUGUCGUCGUCGUCUACGU 5'  
query=novel\_mir\_122, target=R03G\_13479, score=4, range=468-487,  
strand=-1  
target 5' CAACAGCAGCAGCAGCGGCA 3'  
:::::::::::::::::: :::  
query 3' GUUGUCGUCGUCGUCUACGU 5'  
query=novel\_mir\_122, target=R03G\_08761, score=4, range=2958-2977,  
strand=-1  
target 5' CAACAGAAGCAGAAGGUGCA 3'  
:::::: ::::: :::: :::  
query 3' GUUGUCGUCGUCGUCUACGU 5'  
query=novel\_mir\_122, target=R03G\_09852, score=4, range=1452-1470,  
strand=-1  
target 5' UGA-AGCAGCAGCAGGUGUA 3'  
... :::::::::::::  
query 3' GUUGUCGUCGUCGUCUACGU 5'  
query=novel\_mir\_122, target=R03G\_11199, score=4, range=405-424,  
strand=-1  
target 5' CAACAACAGUAGCAGAUGGA 3'  
:::: :::: :::::: :  
query 3' GUUGUCGUCGUCGUCUACGU 5'  
query=novel\_mir\_122, target=R03G\_11445, score=4, range=585-604,  
strand=-1  
target 5' UUACGGCAGCAGCAAUGCA 3'  
. :::::::::::: :  
query 3' GUUGUCGUCGUCGUCUACGU 5'  
query=novel\_mir\_122, target=R03G\_14941, score=4, range=1137-1156,  
strand=-1  
target 5' CAACUACAGCAGCAGGUGUA 3'  
:::: ::::::::::::  
query 3' GUUGUCGUCGUCGUCUACGU 5'  
query=novel\_mir\_122, target=R03G\_02922, score=4, range=57-76,  
strand=-1  
target 5' UAGCAGAAGCAGCAGAAGCA 3'  
..... ::::: :  
query 3' GUUGUCGUCGUCGUCUACGU 5'  
query=novel\_mir\_122, target=R03G\_03629, score=4, range=122-142,

```
strand=-1
target 5' CGUUAGCAGCAGCAGCAUGCA 3'
.. :::::::::::::: :::::
query 3' GUUGUCGUCGUCGUC-UACGU 5'
query=novel_mir_122, target=R03G_14944, score=4, range=19-37,
strand=-1
target 5' GAACAGCAGCAGCA-AUGUA 3'
:::::::::::: :::::
query 3' GUUGUCGUCGUCGUCUACGU 5'
query=novel_mir_122, target=R03G_11822, score=4, range=1527-1546,
strand=-1
target 5' CUACAGCAGCAGCAGCUGCU 3'
: :::::::::::::: :::
query 3' GUUGUCGUCGUCGUCUACGU 5'
query=novel_mir_122, target=R03G_11689, score=4, range=175-193,
strand=-1
target 5' CAACAACAGUAGCA-AUGCA 3'
::::: :::::::::::::: :::::
query 3' GUUGUCGUCGUCGUCUACGU 5'
query=novel_mir_122, target=R03G_03761, score=4, range=205-223,
strand=-1
target 5' AUACAGCAGCAGCAGA-GCA 3'
:::::::::::: :::::
query 3' GUUGUCGUCGUCGUCUACGU 5'
query=novel_mir_122, target=R03G_00684, score=4, range=1497-1515,
strand=-1
target 5' UGAC-GAAGCAGCAGGUGCA 3'
.... : ::::::::::::::
query 3' GUUGUCGUCGUCGUCUACGU 5'
query=novel_mir_122, target=R03G_12784, score=4, range=657-676,
strand=-1
target 5' CACCUGCUGCAGCAGAUGCA 3'
:: : :: ::::::::::::::
query 3' GUUGUCGUCGUCGUCUACGU 5'
query=novel_mir_122, target=R03G_13835, score=4, range=13620-1363
strand=-1
target 5' CAGCGACAGCAGCAGCUGCA 3'
..... :::::::::::::: :::::
query 3' GUUGUCGUCGUCGUCUACGU 5'
query=novel_mir_27, target=R03G_11932, score=0.5, range=390-411,
strand=-1
target 5' CAGUCUCAUCCGAAUUCGGCAA 3'
:::::::::::: ::::::::::::::
query 3' GUUAGAGUAGGCUUAAGCCGUU 5'
query=novel_mir_27, target=R03G_10033, score=0.5, range=390-411,
```



strand=-1  
target 5' CAGUCUCAUCCGAAUUCGGCAA 3'  
:~::~:  
query 3' GUUAGAGUAGGCUUAAGCCGUU 5'  
query=novel\_mir\_27, target=R03G\_12707, score=1, range=1140-1161,  
strand=-1  
target 5' CAAUCUCAUCCGAAUUCGGCGA 3'  
:~::~:  
query 3' GUUAGAGUAGGCUUAAGCCGUU 5'  
query=novel\_mir\_27, target=R03G\_10176, score=1, range=354-375,  
strand=-1  
target 5' CAAUCUCAUUCGAAUUCGGCAA 3'  
:~::~:  
query 3' GUUAGAGUAGGCUUAAGCCGUU 5'  
query=novel\_mir\_27, target=R03G\_03090, score=1, range=282-303,  
strand=-1  
target 5' CAAUCUCAUCCGAAUUCGGCGA 3'  
:~::~:  
query 3' GUUAGAGUAGGCUUAAGCCGUU 5'  
query=novel\_mir\_27, target=R03G\_15211, score=1, range=276-297,  
strand=-1  
target 5' CAAUCUCAUCUGAAUUCGGCAA 3'  
:~::~:  
query 3' GUUAGAGUAGGCUUAAGCCGUU 5'  
query=novel\_mir\_27, target=R03G\_15205, score=1, range=42-63, stra  
target 5' CAAUCUCAUCUGAAUUCGGCAA 3'  
:~::~:  
query 3' GUUAGAGUAGGCUUAAGCCGUU 5'  
query=novel\_mir\_27, target=R03G\_13940, score=2, range=288-309,  
strand=-1  
target 5' CAAUCUCAUUCGAAUUCGGCGA 3'  
:~::~:  
query 3' GUUAGAGUAGGCUUAAGCCGUU 5'  
query=novel\_mir\_27, target=R03G\_10964, score=2, range=1524-1545,  
strand=-1  
target 5' CAAUCUCAUUCGAAUUCGGCGA 3'  
:~::~:  
query 3' GUUAGAGUAGGCUUAAGCCGUU 5'  
query=novel\_mir\_27, target=R03G\_10581, score=2, range=1044-1065,  
strand=-1  
target 5' CAAUCUCAUCCGAAUUUGGCGA 3'  
:~::~:  
query 3' GUUAGAGUAGGCUUAAGCCGUU 5'  
query=novel\_mir\_27, target=R03G\_13355, score=2, range=351-372,  
strand=-1



target 5' CAAUCUCAUUCGAAUUCGGCGA 3'  
:~::~  
query 3' GUUAGAGUAGGCUUAAGCCGUU 5'  
query=novel\_mir\_27, target=R03G\_03518, score=2, range=693-714,  
strand=-1  
target 5' CAAUCUCAUUCGAAUUCGGCGA 3'  
:~::~  
query 3' GUUAGAGUAGGCUUAAGCCGUU 5'  
query=novel\_mir\_27, target=R03G\_10939, score=2, range=474-495,  
strand=-1  
target 5' CAAUCUCAUUCGAAUUCGGCGA 3'  
:~::~  
query 3' GUUAGAGUAGGCUUAAGCCGUU 5'  
query=novel\_mir\_27, target=R03G\_01844, score=2, range=474-495,  
strand=-1  
target 5' CAAUCUCAUUCGAAUUCGGCGA 3'  
:~::~  
query 3' GUUAGAGUAGGCUUAAGCCGUU 5'  
query=novel\_mir\_27, target=R03G\_04917, score=2, range=432-453,  
strand=-1  
target 5' CAAUCUCAUUCGAAUUCGGCGA 3'  
:~::~  
query 3' GUUAGAGUAGGCUUAAGCCGUU 5'  
query=novel\_mir\_27, target=R03G\_15620, score=2, range=354-375,  
strand=-1  
target 5' CAAUCUCAUUCGAAUUCGGCGA 3'  
:~::~  
query 3' GUUAGAGUAGGCUUAAGCCGUU 5'  
query=novel\_mir\_27, target=R03G\_01010, score=2, range=354-375,  
strand=-1  
target 5' CAAUCUCAUUCGAAUUCGGUAA 3'  
:~::~  
query 3' GUUAGAGUAGGCUUAAGCCGUU 5'  
query=novel\_mir\_27, target=R03G\_00618, score=2, range=393-414,  
strand=-1  
target 5' CAAUCUCAUUCGAAUUCGGCGA 3'  
:~::~  
query 3' GUUAGAGUAGGCUUAAGCCGUU 5'  
query=novel\_mir\_27, target=R03G\_11198, score=2, range=351-372,  
strand=-1  
target 5' CAAUCUCAUUCGAAUUCGGCGA 3'  
:~::~  
query 3' GUUAGAGUAGGCUUAAGCCGUU 5'  
query=novel\_mir\_27, target=R03G\_13658, score=2, range=282-303,  
strand=-1

target 5' CAAUCUCAUUCGAAUUCGGCGA 3'  
:~::~  
query 3' GUUAGAGUAGGCUUAAGCCGUU 5'  
query=novel\_mir\_27, target=R03G\_02388, score=2, range=330-351,  
strand=-1  
target 5' CAAUCUCAUUCGAAUUCGGCGA 3'  
:~::~  
query 3' GUUAGAGUAGGCUUAAGCCGUU 5'  
query=novel\_mir\_27, target=R03G\_01166, score=2, range=261-282,  
strand=-1  
target 5' CAAUCUCAUUCGAAUUCGGCGA 3'  
:~::~  
query 3' GUUAGAGUAGGCUUAAGCCGUU 5'  
query=novel\_mir\_27, target=R03G\_12298, score=2, range=276-297,  
strand=-1  
target 5' CAAUCUCAUUCGAAUUCGGCGA 3'  
:~::~  
query 3' GUUAGAGUAGGCUUAAGCCGUU 5'  
query=novel\_mir\_27, target=R03G\_10210, score=2, range=42-63, stra  
target 5' CAAUCUCAUUCGAAUUCGGCGA 3'  
:~::~  
query 3' GUUAGAGUAGGCUUAAGCCGUU 5'  
query=novel\_mir\_27, target=R03G\_01028, score=2, range=42-63, stra  
target 5' CAAUCUCAUUCGAAUUCGGCGA 3'  
:~::~  
query 3' GUUAGAGUAGGCUUAAGCCGUU 5'  
query=novel\_mir\_27, target=R03G\_12001, score=2.5, range=1554-1575  
strand=-1  
target 5' CAAUCUCAUUCGAAUUCGGCGG 3'  
:~::~  
query 3' GUUAGAGUAGGCUUAAGCCGUU 5'  
query=novel\_mir\_27, target=R03G\_09592, score=2.5, range=354-375,  
strand=-1  
target 5' CAAUUUCAUUCGAAUUCGGCGA 3'  
:~::~  
query 3' GUUAGAGUAGGCUUAAGCCGUU 5'  
query=novel\_mir\_27, target=R03G\_11600, score=2.5, range=192-213,  
strand=-1  
target 5' CAGUCUCAUUCGAAUUCGGCGA 3'  
:~::~  
query 3' GUUAGAGUAGGCUUAAGCCGUU 5'  
query=novel\_mir\_27, target=R03G\_09333, score=3, range=42-63, stra  
target 5' CAAUCUCAUUUGAAUUCGGCGA 3'  
:~::~  
query 3' GUUAGAGUAGGCUUAAGCCGUU 5'







```

::: .: ::::::::::::::::::::
query 3' UCGCUACGAAGACUUGUCACCAU 5'
query=novel_mir_114, target=R03G_10264, score=1, range=642-663,
strand=-1
target 5' GAGCAAUCCAACUGUUAGACGA 3'
::::::::::::::::::
query 3' CUCGUUAGGUUGACAGUCUGCU 5'
query=novel_mir_114, target=R03G_12001, score=1, range=624-645,
strand=-1
target 5' GAGCAACCCAACUGUCAGACGA 3'
:::::: ::::::::::::::::::::
query 3' CUCGUUAGGUUGACAGUCUGCU 5'
query=novel_mir_114, target=R03G_10556, score=1, range=624-645,
strand=-1
target 5' GAGCAACCCAACUGUCAGACGA 3'
:::::: ::::::::::::::::::::
query 3' CUCGUUAGGUUGACAGUCUGCU 5'
query=novel_mir_114, target=R03G_17369, score=1, range=624-645,
strand=-1
target 5' GAGCAACCCAACUGUCAGACGA 3'
:::::: ::::::::::::::::::::
query 3' CUCGUUAGGUUGACAGUCUGCU 5'
query=novel_mir_114, target=R03G_01302, score=1, range=195-216,
strand=-1
target 5' GAGCAACCCAACUGUCAGACGA 3'
:::::: ::::::::::::::::::::
query 3' CUCGUUAGGUUGACAGUCUGCU 5'
query=novel_mir_114, target=R03G_00617, score=1.5, range=468-489,
strand=-1
target 5' GAGUAACCCAACUGUCAGACGA 3'
::::: ::::::::::::::::::::
query 3' CUCGUUAGGUUGACAGUCUGCU 5'
query=novel_mir_104, target=R03G_12131, score=3.5, range=490-509,
strand=1
target 5' UUACCCUCUUUCCCCUCUCUG 3'
:: ::::::::::::::::::::
query 3' AAGGGGGGAAAGGGGGGGAC 5'
query=novel_mir_104, target=R03G_01691, score=4, range=471-490,
strand=1
target 5' CUCCUCUCUUUCCCCUCUC 3'
::::::::::::::::::
query 3' AAGGGGGGAAAGGGGGGGAC 5'
query=novel_mir_85, target=R03G_10719, score=0, range=24-45, stra
target 5' GCCUCAAAACCACAUCGGAUCCA 3'
::::::::::::::::::

```



query 3' CGGAGUUUGGUGUAGCCUAGGU 5'  
query=novel\_mir\_40, target=R03G\_03100, score=0, range=629-650,  
strand=1  
target 5' AUCAGCGAUACCCGACAAAUGA 3'  
::::::::::::::::::::::::::

query 3' UAGUCGCUAUGGGCUGUUUACU 5'  
query=novel\_mir\_40, target=R03G\_17332, score=0, range=629-650,  
strand=1  
target 5' AUCAGCGAUACCCGACAAAUGA 3'  
::::::::::::::::::::::::::

query 3' UAGUCGCUAUGGGCUGUUUACU 5'  
query=novel\_mir\_40, target=R03G\_17415, score=0, range=629-650,  
strand=1  
target 5' AUCAGCGAUACCCGACAAAUGA 3'  
::::::::::::::::::::::::::

query 3' UAGUCGCUAUGGGCUGUUUACU 5'  
query=novel\_mir\_40, target=R03G\_06437, score=0, range=629-650,  
strand=1  
target 5' AUCAGCGAUACCCGACAAAUGA 3'  
::::::::::::::::::::::::::

query 3' UAGUCGCUAUGGGCUGUUUACU 5'  
query=novel\_mir\_40, target=R03G\_05341, score=0, range=629-650,  
strand=1  
target 5' AUCAGCGAUACCCGACAAAUGA 3'  
::::::::::::::::::::::::::

query 3' UAGUCGCUAUGGGCUGUUUACU 5'  
query=novel\_mir\_40, target=R03G\_10868, score=0, range=365-386,  
strand=1  
target 5' AUCAGCGAUACCCGACAAAUGA 3'  
::::::::::::::::::::::::::

query 3' UAGUCGCUAUGGGCUGUUUACU 5'  
query=novel\_mir\_40, target=R03G\_14353, score=1, range=629-650,  
strand=1  
target 5' AUCAGCGAUAUCCGACAAAUGA 3'  
::::::::::::::::::::::::::

query 3' UAGUCGCUAUGGGCUGUUUACU 5'  
query=novel\_mir\_40, target=R03G\_12657, score=4, range=629-650,  
strand=1  
target 5' AUCAGCGAUACCCAUCAAAAUGA 3'  
:::::::::::::::::: ::::::

query 3' UAGUCGCUAUGGGCUGUUUACU 5'  
query=novel\_mir\_107, target=R03G\_03605, score=2, range=1044-1066,  
strand=-1  
target 5' UCCAACAAGCAUACCCAGGUCCA 3'  
:::::::::::::::::: ::::::





query=novel\_mir\_68, target=R03G\_12091, score=3.5, range=1217-1238  
strand=-1  
target 5' UCCUCAUCGUCAGCUUCUUCUG 3'  
::: :::: :  
query 3' AGGUGUACCAGUCGAGGAAGAU 5'  
query=novel\_mir\_12, target=R03G\_17199, score=3.5, range=95-118,  
strand=-1  
target 5' AGGAGCUAAAAACAAGCGGUGCA 3'  
::: : :  
query 3' CCCUU-AGUUUUUGUUCGCCACGU 5'  
query=novel\_mir\_47, target=R03G\_12002, score=3, range=1270-1290,  
strand=1  
target 5' UCUA-AAAUGUCUGGCCCUUGA 3'  
:: : : :  
query 3' AGCUAUCUACAGACCGGGAACU 5'  
query=novel\_mir\_47, target=R03G\_16896, score=3, range=1270-1290,  
strand=1  
target 5' UCUA-AAAUGUCUGGCCCUUGA 3'  
:: : : :  
query 3' AGCUAUCUACAGACCGGGAACU 5'  
query=novel\_mir\_47, target=R03G\_00645, score=3, range=1096-1116,  
strand=1  
target 5' UCUA-AAAUGUCUGGCCCUUGA 3'  
:: : : :  
query 3' AGCUAUCUACAGACCGGGAACU 5'  
query=novel\_mir\_110, target=R03G\_11980, score=3.5, range=42-63,  
strand=1  
target 5' ACACUAUCCAAGUACCCUGUCU 3'  
::: . :  
query 3' UGUAGUAGGUUCAUGGGAUAGU 5'  
query=novel\_mir\_110, target=R03G\_11188, score=4, range=1166-1187,  
strand=1  
target 5' ACUGGAUGCAAGUACCCUAUCA 3'  
:: :: :  
query 3' UGUAGUAGGUUCAUGGGAUAGU 5'  
query=novel\_mir\_46, target=R03G\_17327, score=0, range=318-339,  
strand=1  
target 5' CUCCAAUCAGCACUCAGCACAA 3'  
: : : : :  
query 3' GAGGUUAGUCGUGAGUCGUGUU 5'  
query=novel\_mir\_46, target=R03G\_16914, score=2, range=2622-2643,  
strand=1  
target 5' CCCCAAUCAGCGCUCAGCACAA 3'  
: : : : :  
query 3' GAGGUUAGUCGUGAGUCGUGUU 5'





query=novel\_mir\_54, target=R03G\_00853, score=4, range=325-345,  
strand=1  
target 5' AAAGUUAGACAUUCAUUCACA 3'  
:::: ::::::::::::::  
query 3' AGCCAAU-UGUAAGUAAGUGU 5'  
query=novel\_mir\_54, target=R03G\_10278, score=4, range=543-561,  
strand=-1  
target 5' UCGGUUAA-AUUCAUUUGCA 3'  
:::::::::: ::::::::::::::  
query 3' AGCCAAUUGUAAGUAAGUGU 5'  
query=novel\_mir\_38, target=R03G\_01150, score=0, range=736-757,  
strand=1  
target 5' CGUAGACUGGACAUCAUAACA 3'  
:::::::::: ::::::::::::::  
query 3' GCAUCUGACCGUAGUUAUUGU 5'  
query=novel\_mir\_38, target=R03G\_08905, score=0, range=736-757,  
strand=1  
target 5' CGUAGACUGGACAUCAUAACA 3'  
:::::::::: ::::::::::::::  
query 3' GCAUCUGACCGUAGUUAUUGU 5'  
query=novel\_mir\_38, target=R03G\_01159, score=0, range=736-757,  
strand=1  
target 5' CGUAGACUGGACAUCAUAACA 3'  
:::::::::: ::::::::::::::  
query 3' GCAUCUGACCGUAGUUAUUGU 5'  
query=novel\_mir\_38, target=R03G\_03720, score=0, range=736-757,  
strand=1  
target 5' CGUAGACUGGACAUCAUAACA 3'  
:::::::::: ::::::::::::::  
query 3' GCAUCUGACCGUAGUUAUUGU 5'  
query=novel\_mir\_38, target=R03G\_00795, score=0, range=736-757,  
strand=1  
target 5' CGUAGACUGGACAUCAUAACA 3'  
:::::::::: ::::::::::::::  
query 3' GCAUCUGACCGUAGUUAUUGU 5'  
query=novel\_mir\_38, target=R03G\_08300, score=0, range=736-757,  
strand=1  
target 5' CGUAGACUGGACAUCAUAACA 3'  
:::::::::: ::::::::::::::  
query 3' GCAUCUGACCGUAGUUAUUGU 5'  
query=novel\_mir\_38, target=R03G\_05951, score=0, range=736-757,  
strand=1  
target 5' CGUAGACUGGACAUCAUAACA 3'  
:::::::::: ::::::::::::::  
query 3' GCAUCUGACCGUAGUUAUUGU 5'

query=novel\_mir\_38, target=R03G\_11834, score=0.5, range=517-538,  
strand=1  
target 5' UGUAGACUGGACAUCAUAACA 3'  
.....  
query 3' GCAUCUGACCUGUAGUUAUUGU 5'  
query=novel\_mir\_38, target=R03G\_06775, score=3.5, range=754-775,  
strand=1  
target 5' CGUAAAUUGGAUAUCAAAUA 3'  
:::: :.....  
query 3' GCAUCUGACCUGUAGUUAUUGU 5'  
query=novel\_mir\_38, target=R03G\_12567, score=3.5, range=754-775,  
strand=1  
target 5' CGUAAAUUGGAUAUCAAAUA 3'  
:::: :.....  
query 3' GCAUCUGACCUGUAGUUAUUGU 5'  
query=novel\_mir\_38, target=R03G\_15802, score=3.5, range=754-775,  
strand=1  
target 5' CGUAAAUUGGAUAUCAAAUA 3'  
:::: :.....  
query 3' GCAUCUGACCUGUAGUUAUUGU 5'  
query=novel\_mir\_38, target=R03G\_04252, score=3.5, range=754-775,  
strand=1  
target 5' CGUAAAUUGGAUAUCAAAUA 3'  
:::: :.....  
query 3' GCAUCUGACCUGUAGUUAUUGU 5'  
query=novel\_mir\_38, target=R03G\_07854, score=3.5, range=754-775,  
strand=1  
target 5' CGUAAAUUGGAUAUCAAAUA 3'  
:::: :.....  
query 3' GCAUCUGACCUGUAGUUAUUGU 5'  
query=novel\_mir\_38, target=R03G\_02364, score=3.5, range=754-775,  
strand=1  
target 5' CGUAAAUUGGAUAUCAAAUA 3'  
:::: :.....  
query 3' GCAUCUGACCUGUAGUUAUUGU 5'  
query=novel\_mir\_38, target=R03G\_16779, score=3.5, range=754-775,  
strand=1  
target 5' CGUAAAUUGGAUAUCAAAUA 3'  
:::: :.....  
query 3' GCAUCUGACCUGUAGUUAUUGU 5'  
query=novel\_mir\_38, target=R03G\_14949, score=3.5, range=376-397,  
strand=1  
target 5' CGUAAAUUGGAUAUCAAAUA 3'  
:::: :.....  
query 3' GCAUCUGACCUGUAGUUAUUGU 5'



query=novel\_mir\_38, target=R03G\_04496, score=3.5, range=376-397,  
strand=1  
target 5' CGUAAAUUGGAUAUCAAAUA 3'  
:::: :.:.:.:.:.:.:.:.:.:.:  
query 3' GCAUCUGACCUGUAGUUAUUGU 5'  
query=novel\_mir\_38, target=R03G\_01157, score=3.5, range=376-397,  
strand=1  
target 5' CGUAAAUUGGAUAUCAAAUA 3'  
:::: :.:.:.:.:.:.:.:.:.:.:  
query 3' GCAUCUGACCUGUAGUUAUUGU 5'  
query=novel\_mir\_38, target=R03G\_16085, score=3.5, range=754-775,  
strand=1  
target 5' CGUAAAUUGGAUAUCAAAUA 3'  
:::: :.:.:.:.:.:.:.:.:.:.:  
query 3' GCAUCUGACCUGUAGUUAUUGU 5'  
query=novel\_mir\_38, target=R03G\_14215, score=3.5, range=754-775,  
strand=1  
target 5' CGUAAAUUGGAUAUCAAAUA 3'  
:::: :.:.:.:.:.:.:.:.:.:.:  
query 3' GCAUCUGACCUGUAGUUAUUGU 5'  
query=novel\_mir\_38, target=R03G\_16776, score=3.5, range=376-397,  
strand=1  
target 5' CGUAAAUUGGAUAUCAAAUA 3'  
:::: :.:.:.:.:.:.:.:.:.:.:  
query 3' GCAUCUGACCUGUAGUUAUUGU 5'  
query=novel\_mir\_38, target=R03G\_17397, score=3.5, range=376-397,  
strand=1  
target 5' CGUAAAUUGGAUAUCAAAUA 3'  
:::: :.:.:.:.:.:.:.:.:.:.:  
query 3' GCAUCUGACCUGUAGUUAUUGU 5'  
query=novel\_mir\_38, target=R03G\_06350, score=3.5, range=376-397,  
strand=1  
target 5' CGUAAAUUGGAUAUCAAAUA 3'  
:::: :.:.:.:.:.:.:.:.:.:.:  
query 3' GCAUCUGACCUGUAGUUAUUGU 5'  
query=novel\_mir\_38, target=R03G\_08634, score=3.5, range=376-397,  
strand=1  
target 5' CGUAAAUUGGAUAUCAAAUA 3'  
:::: :.:.:.:.:.:.:.:.:.:.:  
query 3' GCAUCUGACCUGUAGUUAUUGU 5'  
query=novel\_mir\_38, target=R03G\_04993, score=4, range=376-397,  
strand=1  
target 5' CGAAAACUUGACAUCAAAUA 3'  
:: : : : :.:.:.:.:.:.:.:.:.:.:  
query 3' GCAUCUGACCUGUAGUUAUUGU 5'



query=novel\_mir\_51, target=R03G\_00958, score=3.5, range=1020-1042  
strand=-1  
target 5' UGUCUAAUGUCACAAACUGUUUA 3'  
::::: ::::::::::::::::::::  
query 3' ACAGA-GACGGUGUUUGGCAAU 5'  
query=novel\_mir\_51, target=R03G\_12000, score=4, range=49-69, stra  
target 5' UGU-UCUGCUACUAACCGUUUA 3'  
::: ::::::::::: :::::::::::::::  
query 3' ACAGAGACGGUGUUUGGCAAU 5'  
query=novel\_mir\_73, target=R03G\_12457, score=0, range=920-941,  
strand=1  
target 5' AUCCGCACAUGAAAGGUCACUA 3'  
::::::::::::::::::::::::::  
query 3' UAGGCGUGUACUUUCCAGUGAU 5'  
query=novel\_mir\_73, target=R03G\_08570, score=0, range=11-32, stra  
target 5' AUCCGCACAUGAAAGGUCACUA 3'  
::::::::::::::::::::::::::  
query 3' UAGGCGUGUACUUUCCAGUGAU 5'  
query=novel\_mir\_73, target=R03G\_16443, score=1, range=20-41, stra  
target 5' AUCCGCACAUGAAAGGUCAUUA 3'  
::::::::::::::::::::::::::  
query 3' UAGGCGUGUACUUUCCAGUGAU 5'  
query=novel\_mir\_73, target=R03G\_03724, score=1, range=701-722,  
strand=1  
target 5' AUCCACACAUGAAAGGUCACUA 3'  
::::: ::::::::::::::::::::  
query 3' UAGGCGUGUACUUUCCAGUGAU 5'  
query=novel\_mir\_73, target=R03G\_17048, score=1.5, range=26-47,  
strand=1  
target 5' AUCCGCAUAUGAAAGGUUACUA 3'  
::::::::::::::::::  
query 3' UAGGCGUGUACUUUCCAGUGAU 5'  
query=novel\_mir\_73, target=R03G\_15794, score=1.5, range=239-260,  
strand=1  
target 5' AUCCACAUAUGAAAGGUCACUA 3'  
::::: ::::::::::::::::::::  
query 3' UAGGCGUGUACUUUCCAGUGAU 5'  
query=novel\_mir\_73, target=R03G\_01430, score=2, range=818-839,  
strand=1  
target 5' UUCCGCACAUGAAAGGUCACUU 3'  
::::::::::::::::::  
query 3' UAGGCGUGUACUUUCCAGUGAU 5'  
query=novel\_mir\_73, target=R03G\_16382, score=2, range=1052-1073,  
strand=1  
target 5' AUCCGAACAUGAAAGGUCAUUA 3'

```
::::: ::::::::::::::::::::
query 3' UAGGCGUGUACUUUCCAGUGAU 5'
query=novel_mir_73, target=R03G_08647, score=3, range=461-482,
strand=1
target 5' AUUCUCAUAUGAAAGGUCAUUA 3'
::: ::::::::::::::::::::
query 3' UAGGCGUGUACUUUCCAGUGAU 5'
query=novel_mir_73, target=R03G_15207, score=3, range=239-260,
strand=1
target 5' ACCUACAUAUGAAAGGUCACUA 3'
: . ::::::::::::::::::::
query 3' UAGGCGUGUACUUUCCAGUGAU 5'
query=novel_mir_73, target=R03G_09250, score=3.5, range=983-1004,
strand=1
target 5' AUCUGCACAUGAAAGGCCAUUA 3'
::::: ::::::::::::::::::::
query 3' UAGGCGUGUACUUUCCAGUGAU 5'
query=novel_mir_73, target=R03G_03146, score=3.5, range=599-620,
strand=1
target 5' AUCUGCACAUGAAAGGACAUUA 3'
::::: ::::::::::::::::::::
query 3' UAGGCGUGUACUUUCCAGUGAU 5'
query=novel_mir_73, target=R03G_01842, score=3.5, range=674-695,
strand=1
target 5' AUCCACAUAUGAAAGGCCACUA 3'
::::: ::::::::::::::::::::
query 3' UAGGCGUGUACUUUCCAGUGAU 5'
query=novel_mir_73, target=R03G_01465, score=3.5, range=239-260,
strand=1
target 5' AUCCACAUAUGAAAGGCCACUA 3'
::::: ::::::::::::::::::::
query 3' UAGGCGUGUACUUUCCAGUGAU 5'
query=novel_mir_73, target=R03G_02484, score=4, range=668-689,
strand=1
target 5' AUCCACACAUGAAAGAUCAUUA 3'
::::: ::::::::::::::::::::
query 3' UAGGCGUGUACUUUCCAGUGAU 5'
query=novel_mir_73, target=R03G_12619, score=4, range=440-460,
strand=-1
target 5' AAUCAU-CAUGAAAGGUCACUA 3'
: .: . ::::::::::::::::::::
query 3' UAGGCGUGUACUUUCCAGUGAU 5'
query=novel_mir_105, target=R03G_14596, score=0.5, range=127-148,
strand=-1
target 5' AUUCAUCAUCCAGUCUUGCCCA 3'
```

```
.....
query 3' UGAGUAGUAGGUCAGAACGGGU 5'
query=novel_mir_105, target=R03G_09279, score=1.5, range=514-535,
strand=-1
target 5' GCUCAUGAUCCAGUCUUGCCCA 3'
.....
query 3' UGAGUAGUAGGUCAGAACGGGU 5'
query=novel_mir_105, target=R03G_15523, score=2.5, range=125-146,
strand=1
target 5' GCUCAUCAUCCAGCCUUGCCCA 3'
.....
query 3' UGAGUAGUAGGUCAGAACGGGU 5'
query=novel_mir_105, target=R03G_11567, score=4, range=1636-1657,
strand=-1
target 5' ACUCAUCAUCCAUCUUCUCCCA 3'
.....
query 3' UGAGUAGUAGGUCAGAACGGGU 5'
query=novel_mir_105, target=R03G_01923, score=4, range=928-949,
strand=-1
target 5' ACUCAUCAUCCAUCUUCUCCCA 3'
.....
query 3' UGAGUAGUAGGUCAGAACGGGU 5'
query=novel_mir_105, target=R03G_09419, score=4, range=799-820,
strand=-1
target 5' ACUCAUCAUCCAUCUUCUCCCA 3'
.....
query 3' UGAGUAGUAGGUCAGAACGGGU 5'
query=novel_mir_105, target=R03G_11486, score=4, range=688-709,
strand=-1
target 5' ACUCAUCAUCCAUCUUCUCCCA 3'
.....
query 3' UGAGUAGUAGGUCAGAACGGGU 5'
query=novel_mir_105, target=R03G_04110, score=4, range=676-697,
strand=-1
target 5' ACUCAUCAUCCAUCUUCUCCCA 3'
.....
query 3' UGAGUAGUAGGUCAGAACGGGU 5'
query=novel_mir_105, target=R03G_04104, score=4, range=676-697,
strand=-1
target 5' ACUCAUCAUCCAUCUUCUCCCA 3'
.....
query 3' UGAGUAGUAGGUCAGAACGGGU 5'
query=novel_mir_105, target=R03G_10644, score=4, range=364-385,
strand=-1
target 5' ACUCAUCAUCCAUCUUCUCCCA 3'
```

:::::::::: : : : :  
query 3' UGAGUAGUAGGUCAGAACGGGU 5'  
query=novel\_mir\_105, target=R03G\_05535, score=4, range=364-385,  
strand=-1  
target 5' ACUCAUCAUCCAUCUUUCCCA 3'  
:::::::::: : : : :  
query 3' UGAGUAGUAGGUCAGAACGGGU 5'  
query=novel\_mir\_105, target=R03G\_11757, score=4, range=364-385,  
strand=-1  
target 5' ACUCAUCAUCCAUCUUUCCCA 3'  
:::::::::: : : : :  
query 3' UGAGUAGUAGGUCAGAACGGGU 5'  
query=novel\_mir\_105, target=R03G\_11765, score=4, range=364-385,  
strand=-1  
target 5' ACUCAUCAUCCAUCUUUCCCA 3'  
:::::::::: : : : :  
query 3' UGAGUAGUAGGUCAGAACGGGU 5'  
query=novel\_mir\_105, target=R03G\_12139, score=4, range=352-373,  
strand=-1  
target 5' ACUCAUCAUCCAUCUUUCCCA 3'  
:::::::::: : : : :  
query 3' UGAGUAGUAGGUCAGAACGGGU 5'  
query=novel\_mir\_105, target=R03G\_05616, score=4, range=268-289,  
strand=-1  
target 5' ACUCAUCAUCCAUCUUUCCCA 3'  
:::::::::: : : : :  
query 3' UGAGUAGUAGGUCAGAACGGGU 5'  
query=novel\_mir\_105, target=R03G\_11482, score=4, range=476-496,  
strand=-1  
target 5' UCUCAUCA-CCAGUCUUGACCA 3'  
:::::::::: : : : :  
query 3' UGAGUAGUAGGUCAGAACGGGU 5'  
query=novel\_mir\_56, target=R03G\_14871, score=3, range=1489-1510,  
strand=-1  
target 5' UUGACUCCACUCCGACCUCCAA 3'  
:::::::::: : : : :  
query 3' AACUGAAGUGAGGCCGGAGGUU 5'  
query=novel\_mir\_56, target=R03G\_14881, score=3, range=1489-1510,  
strand=-1  
target 5' UUGACUCCACUCCGACCUCCAA 3'  
:::::::::: : : : :  
query 3' AACUGAAGUGAGGCCGGAGGUU 5'  
query=novel\_mir\_56, target=R03G\_00634, score=3, range=622-643,  
strand=-1  
target 5' UUGACUCCACUCCGACCUCCAA 3'

::::: ::::: :::::  
query 3' AACUGAAGUGAGGCCGGAGGUU 5'  
query=novel\_mir\_56, target=R03G\_03159, score=3.5, range=550-571,  
strand=-1  
target 5' UUGCCUCCGCUCCGGCUUCCAA 3'  
::: :: :.::::: :::::  
query 3' AACUGAAGUGAGGCCGGAGGUU 5'  
query=novel\_mir\_56, target=R03G\_00131, score=3.5, range=412-433,  
strand=-1  
target 5' UUGCCUCCGCUCCGGCUUCCAA 3'  
::: :: :.::::: :::::  
query 3' AACUGAAGUGAGGCCGGAGGUU 5'  
query=novel\_mir\_56, target=R03G\_09665, score=3.5, range=229-250,  
strand=-1  
target 5' UUGCCUCCGCUCCGGCUUCCAA 3'  
::: :: :.::::: :::::  
query 3' AACUGAAGUGAGGCCGGAGGUU 5'  
query=novel\_mir\_56, target=R03G\_02669, score=4, range=631-652,  
strand=-1  
target 5' CUGACUCCACUCCGACCUCCAA 3'  
::::: ::::: :::::  
query 3' AACUGAAGUGAGGCCGGAGGUU 5'  
query=novel\_mir\_17, target=R03G\_12520, score=0, range=1144-1165,  
strand=1  
target 5' GCUUAUGACACUGUUGACCGUA 3'  
::::: ::::: :::::  
query 3' CGAAUACUGUGACAACUGGCAU 5'  
query=novel\_mir\_17, target=R03G\_00797, score=0, range=1144-1165,  
strand=1  
target 5' GCUUAUGACACUGUUGACCGUA 3'  
::::: ::::: :::::  
query 3' CGAAUACUGUGACAACUGGCAU 5'  
query=novel\_mir\_17, target=R03G\_13221, score=3.5, range=1426-1447  
strand=1  
target 5' GCUUAUGACACUGUUGAUCGAG 3'  
::::: ::::: ::::: .  
query 3' CGAAUACUGUGACAACUGGCAU 5'  
query=novel\_mir\_17, target=R03G\_13224, score=3.5, range=1426-1447  
strand=1  
target 5' GCUUAUGACACUGUUGAUCGAG 3'  
::::: ::::: ::::: .  
query 3' CGAAUACUGUGACAACUGGCAU 5'  
query=novel\_mir\_17, target=R03G\_04120, score=3.5, range=1426-1447  
strand=1  
target 5' GCUUAUGACACUGUUGAUCGAG 3'

```
..... .
query 3' CGAAUACUGUGACAACUGGCAU 5'
query=novel_mir_17, target=R03G_04123, score=3.5, range=1426-1447
strand=1
target 5' GCUUAUGACACUGUUGAUCGAG 3'
..... .
query 3' CGAAUACUGUGACAACUGGCAU 5'
query=novel_mir_17, target=R03G_04203, score=3.5, range=370-391,
strand=1
target 5' GCUUAUGACACUGUUGAUCGAG 3'
..... .
query 3' CGAAUACUGUGACAACUGGCAU 5'
query=novel_mir_17, target=R03G_17094, score=3.5, range=85-106,
strand=1
target 5' GCUUAUGACACUGUUGAUCGAG 3'
..... .
query 3' CGAAUACUGUGACAACUGGCAU 5'
query=novel_mir_17, target=R03G_05216, score=4, range=706-727,
strand=1
target 5' GCAUAUGAUACCGUUGACCGUG 3'
:: .....
query 3' CGAAUACUGUGACAACUGGCAU 5'
query=novel_mir_32, target=R03G_08267, score=3.5, range=1160-1180
strand=1
target 5' GUCAUC-AGCAAUUCGUCAUCA 3'
..... :
query 3' UAGUAGUUCGUUUAGCAGCAGU 5'
query=novel_mir_32, target=R03G_03314, score=4, range=63-84, str
target 5' GUUAUCCAUCAGAUCGUCGUCA 3'
..... :
query 3' UAGUAGUUCGUUUAGCAGCAGU 5'
query=novel_mir_32, target=R03G_15181, score=4, range=979-999,
strand=-1
target 5' AUCAGC-AGCAAUUCGUUGUCC 3'
:::: :
query 3' UAGUAGUUCGUUUAGCAGCAGU 5'
query=novel_mir_2, target=R03G_00816, score=0, range=604-625, str
target 5' GUUGGCGAAGAAGAGUCUGAAA 3'
.....
query 3' CAACCGCUUCUUCUCAGACUUU 5'
query=novel_mir_2, target=R03G_04185, score=3.5, range=1816-1837,
strand=1
target 5' GUCGGUGAUGAAGAGUUUGAAA 3'
:: .....
query 3' CAACCGCUUCUUCUCAGACUUU 5'
```



query=novel\_mir\_2, target=R03G\_00477, score=4, range=1563-1584,  
strand=1  
target 5' GUUAUCAAAGAAGAGUCUGAAU 3'  
::: : ::::::::::::::::::::  
query 3' CAACCGCUUCUUCUCAGACUUU 5'

query=novel\_mir\_118, target=R03G\_06035, score=4, range=1176-1197,  
strand=1  
target 5' UCAUGGCCUCAUUUCAUUUCUG 3'  
:::::::::: .::::::::::.  
query 3' AGUGCCGGAGUUGAGUAAAGAU 5'

query=novel\_mir\_9, target=R03G\_02455, score=0, range=180-201, str  
target 5' UGAAGCAAUAGCUGACCCUAUA 3'  
::::::::::::::::::::::::::  
query 3' ACUUCGUUAUCGACUGGGAUAU 5'

query=novel\_mir\_9, target=R03G\_13030, score=1, range=261-282, str  
target 5' UGAAGCAAUAGCUGACCCUAUA 3'  
::::::::::::::::::::::::::  
query 3' ACUUCGUUAUCGACUGGGAUAU 5'

query=novel\_mir\_9, target=R03G\_04131, score=1, range=936-957, str  
target 5' UGAAACAAUAGCUGACCCUAUA 3'  
:::: ::::::::::::::::::::  
query 3' ACUUCGUUAUCGACUGGGAUAU 5'

query=novel\_mir\_9, target=R03G\_10820, score=1, range=936-957, str  
target 5' UGAAACAAUAGCUGACCCUAUA 3'  
:::: ::::::::::::::::::::  
query 3' ACUUCGUUAUCGACUGGGAUAU 5'

query=novel\_mir\_9, target=R03G\_11694, score=1, range=711-732, str  
target 5' UGAAACAAUAGCUGACCCUAUA 3'  
:::: ::::::::::::::::::::  
query 3' ACUUCGUUAUCGACUGGGAUAU 5'

query=novel\_mir\_9, target=R03G\_03269, score=1, range=780-801, str  
target 5' UGAAACAAUAGCUGACCCUAUA 3'  
:::: ::::::::::::::::::::  
query 3' ACUUCGUUAUCGACUGGGAUAU 5'

query=novel\_mir\_9, target=R03G\_02367, score=1, range=612-633, str  
target 5' UGAAACAAUAGCUGACCCUAUA 3'  
:::: ::::::::::::::::::::  
query 3' ACUUCGUUAUCGACUGGGAUAU 5'

query=novel\_mir\_9, target=R03G\_06354, score=1, range=489-510, str  
target 5' UGAAACAAUAGCUGACCCUAUA 3'  
:::: ::::::::::::::::::::  
query 3' ACUUCGUUAUCGACUGGGAUAU 5'

query=novel\_mir\_9, target=R03G\_09771, score=1, range=234-255, str  
target 5' UGAAACAAUAGCUGACCCUAUA 3'  
:::: ::::::::::::::::::::

query 3' ACUUCGUUAUCGACUGGGAUUAU 5'  
query=novel\_mir\_9, target=R03G\_00521, score=2, range=630-651, str  
target 5' UGAAACAAUAGCUGGCCCUAUA 3'  
:::: ::::::::::::::::::::  
query 3' ACUUCGUUAUCGACUGGGAUUAU 5'  
query=novel\_mir\_9, target=R03G\_06306, score=2, range=612-633, str  
target 5' UGAAACAAUAGCUGAUCCUAUA 3'  
:::: ::::::::::::::::::::  
query 3' ACUUCGUUAUCGACUGGGAUUAU 5'  
query=novel\_mir\_9, target=R03G\_10178, score=2, range=612-633, str  
target 5' UAAAGCAAUAGCUGAUCCUAUA 3'  
: ::::::::::::::::::::  
query 3' ACUUCGUUAUCGACUGGGAUUAU 5'  
query=novel\_mir\_9, target=R03G\_10175, score=2, range=612-633, str  
target 5' UAAAGCAAUAGCUGAUCCUAUA 3'  
: ::::::::::::::::::::  
query 3' ACUUCGUUAUCGACUGGGAUUAU 5'  
query=novel\_mir\_125, target=R03G\_17398, score=1, range=663-684,  
strand=-1  
target 5' GCGGACUUGCUUCCAAGAGAGA 3'  
:::: ::::::::::::::::::::  
query 3' CGCCUGAACGAGGGUUCUCUCU 5'  
query=novel\_mir\_125, target=R03G\_01303, score=2, range=663-684,  
strand=-1  
target 5' GCGGACUUGUUUCCAAGAGAGA 3'  
:::: ::::::::::::::::::::  
query 3' CGCCUGAACGAGGGUUCUCUCU 5'  
query=novel\_mir\_125, target=R03G\_02953, score=2, range=663-684,  
strand=-1  
target 5' GCGGACUUGUUUCCAAGAGAGA 3'  
:::: ::::::::::::::::::::  
query 3' CGCCUGAACGAGGGUUCUCUCU 5'  
query=novel\_mir\_125, target=R03G\_14706, score=2, range=549-570,  
strand=-1  
target 5' GCGGACUUGUUUCCAAGAGAGA 3'  
:::: ::::::::::::::::::::  
query 3' CGCCUGAACGAGGGUUCUCUCU 5'  
query=novel\_mir\_125, target=R03G\_12055, score=2, range=663-684,  
strand=-1  
target 5' GCGGACUUGUUUCCAAGAGAGA 3'  
:::: ::::::::::::::::::::  
query 3' CGCCUGAACGAGGGUUCUCUCU 5'  
query=novel\_mir\_125, target=R03G\_15000, score=2, range=522-543,  
strand=-1  
target 5' GCGGACUUGUUUCCAAGAGAGA 3'

query 3' CGCCUGAACGAGGGUUCUCUCU 5'  
query=novel\_mir\_125, target=R03G\_14802, score=3, range=663-684,  
strand=-1  
target 5' ACGGACUUGUUCCAAGAGAGA 3'

query 3' CGCCUGAACGAGGGUUCUCUCU 5'  
query=novel\_mir\_125, target=R03G\_12713, score=4, range=72-92, str  
target 5' GCGCAC-UGCACCCAAGAGAGA 3'

query 3' CGCCUGAACGAGGGUUCUCUCU 5'  
query=novel\_mir\_25, target=R03G\_14766, score=4, range=279-301,  
strand=-1  
target 5' GAAUUGAAAUGAGUAGUAUAUUA 3'

query 3' CUU AACUUUACUCAUUGCAUAAU 5'  
query=novel\_mir\_14, target=R03G\_16227, score=3, range=210-233,  
strand=-1  
target 5' UGUACAGGAUGUUCUUUUUUUAUUA 3'

query 3' UCAUGUGC-ACAAGAAAAAAUAAU 5'  
query=novel\_mir\_14, target=R03G\_09757, score=4, range=212-233,  
strand=-1  
target 5' ACUAUGC-UGUUCUUUUUUUAUUU 3'

query 3' UCAUGUGCACAAGAAAAAAUAAU 5'  
query=novel\_mir\_14, target=R03G\_06306, score=4, range=344-367,  
strand=-1  
target 5' AGUGGACGAGUUUCUUUUUUUAUUG 3'

query 3' UCAUGUGCAC-AAGAAAAAAUAAU 5'  
query=novel\_mir\_14, target=R03G\_10895, score=4, range=482-503,  
strand=-1  
target 5' UGUACACGU-UUCUUUUUUUCUUA 3'

query 3' UCAUGUGCACAAGAAAAAAUAAU 5'  
query=novel\_mir\_123, target=R03G\_01945, score=1, range=180-200,  
strand=-1  
target 5' AUCCAUUGAAGUUGUAGCUCA 3'

query 3' UAGGUAACUUCAACGUCGAGU 5'  
query=novel\_mir\_123, target=R03G\_13280, score=1, range=180-200,  
strand=-1  
target 5' AUCCAUUGAAGUUGUAGCUCA 3'

query 3' UAGGUAACUUCAACGUCGAGU 5'  
query=novel\_mir\_123, target=R03G\_07703, score=1, range=180-200,  
strand=-1  
target 5' AUCAAUUGAAGUUGCAGCUCA 3'  
::: ::::::::::::::::::::

query 3' UAGGUAACUUCAACGUCGAGU 5'  
query=novel\_mir\_123, target=R03G\_17364, score=2, range=180-200,  
strand=-1  
target 5' AUCCAUUGAAGUUGAAGCUCA 3'  
:::::::::::::::::: :::::

query 3' UAGGUAACUUCAACGUCGAGU 5'  
query=novel\_mir\_123, target=R03G\_05522, score=3, range=842-862,  
strand=1  
target 5' AUCAAUUGAAGUUGAAGCUCA 3'  
::: :::::::::::::: :::::

query 3' UAGGUAACUUCAACGUCGAGU 5'  
query=novel\_mir\_123, target=R03G\_03112, score=3, range=842-862,  
strand=1  
target 5' AUCAAUUGAAGUUGAAGCUCA 3'  
::: :::::::::::::: :::::

query 3' UAGGUAACUUCAACGUCGAGU 5'  
query=novel\_mir\_123, target=R03G\_00240, score=3, range=785-805,  
strand=1  
target 5' AUCAAUUGAAGUUGAAGCUCA 3'  
::: :::::::::::::: :::::

query 3' UAGGUAACUUCAACGUCGAGU 5'  
query=novel\_mir\_123, target=R03G\_02227, score=3, range=842-862,  
strand=1  
target 5' AUCAAUUGAAGUUGAAGCUCA 3'  
::: :::::::::::::: :::::

query 3' UAGGUAACUUCAACGUCGAGU 5'  
query=novel\_mir\_123, target=R03G\_14784, score=3, range=476-496,  
strand=1  
target 5' AUCAAUUGAAGUUGAAGCUCA 3'  
::: :::::::::::::: :::::

query 3' UAGGUAACUUCAACGUCGAGU 5'  
query=novel\_mir\_123, target=R03G\_16737, score=3, range=476-496,  
strand=1  
target 5' AUCAAUUGAAGUUGAAGCUCA 3'  
::: :::::::::::::: :::::

query 3' UAGGUAACUUCAACGUCGAGU 5'  
query=novel\_mir\_123, target=R03G\_17423, score=3, range=476-496,  
strand=1  
target 5' AUCAAUUGAAGUUGAAGCUCA 3'  
::: :::::::::::::: :::::

query 3' UAGGUAACUUCAACGUCGAGU 5'  
query=novel\_mir\_123, target=R03G\_03560, score=3, range=476-496,  
strand=1  
target 5' AUCAAUUGAAGUUGAAGCUCA 3'  
::: ::::::::::: :::::

query 3' UAGGUAACUUCAACGUCGAGU 5'  
query=novel\_mir\_123, target=R03G\_16141, score=3, range=476-496,  
strand=1  
target 5' AUCAAUUGAAGUUGAAGCUCA 3'  
::: ::::::::::: :::::

query 3' UAGGUAACUUCAACGUCGAGU 5'  
query=novel\_mir\_123, target=R03G\_07723, score=3, range=476-496,  
strand=1  
target 5' AUCAAUUGAAGUUGAAGCUCA 3'  
::: ::::::::::: :::::

query 3' UAGGUAACUUCAACGUCGAGU 5'  
query=novel\_mir\_123, target=R03G\_16541, score=3, range=476-496,  
strand=1  
target 5' AUCAAUUGAAGUUGAAGCUCA 3'  
::: ::::::::::: :::::

query 3' UAGGUAACUUCAACGUCGAGU 5'  
query=novel\_mir\_123, target=R03G\_01725, score=3, range=476-496,  
strand=1  
target 5' AUCAAUUGAAGUUGAAGCUCA 3'  
::: ::::::::::: :::::

query 3' UAGGUAACUUCAACGUCGAGU 5'  
query=novel\_mir\_123, target=R03G\_12950, score=3, range=476-496,  
strand=1  
target 5' AUCAAUUGAAGUUGAAGCUCA 3'  
::: ::::::::::: :::::

query 3' UAGGUAACUUCAACGUCGAGU 5'  
query=novel\_mir\_123, target=R03G\_13752, score=3, range=476-496,  
strand=1  
target 5' AUCAAUUGAAGUUGAAGCUCA 3'  
::: ::::::::::: :::::

query 3' UAGGUAACUUCAACGUCGAGU 5'  
query=novel\_mir\_123, target=R03G\_03791, score=3, range=476-496,  
strand=1  
target 5' AUCAAUUGAAGUUGAAGCUCA 3'  
::: ::::::::::: :::::

query 3' UAGGUAACUUCAACGUCGAGU 5'  
query=novel\_mir\_123, target=R03G\_14981, score=3, range=476-496,  
strand=1  
target 5' AUCAAUUGAAGUUGAAGCUCA 3'  
::: ::::::::::: :::::

query 3' UAGGUAACUUCAACGUCGAGU 5'  
query=novel\_mir\_123, target=R03G\_15286, score=3, range=476-496,  
strand=1  
target 5' AUCAAUUGAAGUUGAAGCUCA 3'  
::: ::::::::::: :::::

query 3' UAGGUAACUUCAACGUCGAGU 5'  
query=novel\_mir\_123, target=R03G\_17328, score=3, range=476-496,  
strand=1  
target 5' AUCAAUUGAAGUUGAAGCUCA 3'  
::: ::::::::::: :::::

query 3' UAGGUAACUUCAACGUCGAGU 5'  
query=novel\_mir\_123, target=R03G\_15170, score=3, range=476-496,  
strand=1  
target 5' AUCAAUUGAAGUUGAAGCUCA 3'  
::: ::::::::::: :::::

query 3' UAGGUAACUUCAACGUCGAGU 5'  
query=novel\_mir\_123, target=R03G\_11536, score=3, range=476-496,  
strand=1  
target 5' AUCAAUUGAAGUUGAAGCUCA 3'  
::: ::::::::::: :::::

query 3' UAGGUAACUUCAACGUCGAGU 5'  
query=novel\_mir\_123, target=R03G\_17092, score=3, range=476-496,  
strand=1  
target 5' AUCAAUUGAAGUUGAAGCUCA 3'  
::: ::::::::::: :::::

query 3' UAGGUAACUUCAACGUCGAGU 5'  
query=novel\_mir\_123, target=R03G\_09926, score=3, range=476-496,  
strand=1  
target 5' AUCAAUUGAAGUUGAAGCUCA 3'  
::: ::::::::::: :::::

query 3' UAGGUAACUUCAACGUCGAGU 5'  
query=novel\_mir\_123, target=R03G\_10050, score=3, range=476-496,  
strand=1  
target 5' AUCAAUUGAAGUUGAAGCUCA 3'  
::: ::::::::::: :::::

query 3' UAGGUAACUUCAACGUCGAGU 5'  
query=novel\_mir\_123, target=R03G\_05516, score=3, range=476-496,  
strand=1  
target 5' AUCAAUUGAAGUUGAAGCUCA 3'  
::: ::::::::::: :::::

query 3' UAGGUAACUUCAACGUCGAGU 5'  
query=novel\_mir\_123, target=R03G\_10785, score=3, range=429-449,  
strand=1  
target 5' AUCAAUUGAAGUUGAAGCUCA 3'  
::: ::::::::::: :::::

query 3' UAGGUAACUUCAACGUCGAGU 5'  
query=novel\_mir\_123, target=R03G\_00250, score=3, range=429-449,  
strand=1  
target 5' AUCAAUUGAAGUUGAAGCUCA 3'  
::: ::::::::::: :::::  
query 3' UAGGUAACUUCAACGUCGAGU 5'  
query=novel\_mir\_123, target=R03G\_12084, score=3, range=429-449,  
strand=1  
target 5' AUCAAUUGAAGUUGAAGCUCA 3'  
::: ::::::::::: :::::  
query 3' UAGGUAACUUCAACGUCGAGU 5'  
query=novel\_mir\_123, target=R03G\_01317, score=3, range=180-200,  
strand=-1  
target 5' AUCCAUUGAAGCUGUAGCUCA 3'  
::::::::::::: :::::::::::  
query 3' UAGGUAACUUCAACGUCGAGU 5'  
query=novel\_mir\_123, target=R03G\_00261, score=3, range=537-557,  
strand=-1  
target 5' AUCAAUUGAAGUUGAAGCUCA 3'  
::: ::::::::::: :::::  
query 3' UAGGUAACUUCAACGUCGAGU 5'  
query=novel\_mir\_123, target=R03G\_08840, score=3, range=180-200,  
strand=-1  
target 5' AUCAAUUGAAGUUGAAGCUCA 3'  
::: ::::::::::: :::::  
query 3' UAGGUAACUUCAACGUCGAGU 5'  
query=novel\_mir\_123, target=R03G\_07857, score=3, range=180-200,  
strand=-1  
target 5' AUCAAUUGAAGUUGAAGCUCA 3'  
::: ::::::::::: :::::  
query 3' UAGGUAACUUCAACGUCGAGU 5'  
query=novel\_mir\_123, target=R03G\_10037, score=3, range=180-200,  
strand=-1  
target 5' AUCAAUUGAAGUUGAAGCUCA 3'  
::: ::::::::::: :::::  
query 3' UAGGUAACUUCAACGUCGAGU 5'  
query=novel\_mir\_123, target=R03G\_03625, score=3, range=180-200,  
strand=-1  
target 5' AUCAAUUGAAGUUGAAGCUCA 3'  
::: ::::::::::: :::::  
query 3' UAGGUAACUUCAACGUCGAGU 5'  
query=novel\_mir\_123, target=R03G\_00257, score=3, range=180-200,  
strand=-1  
target 5' AUCAAUUGAAGUUGAAGCUCA 3'  
::: ::::::::::: :::::

query 3' UAGGUAACUUCAACGUCGAGU 5'  
query=novel\_mir\_123, target=R03G\_10087, score=3.5, range=183-203,  
strand=1  
target 5' AUUGAUUCAGGUUGCAGCUCA 3'  
::: ::: :.:.:.:.:.:.:.:.:.:.:  
query 3' UAGGUAACUUCAACGUCGAGU 5'  
query=novel\_mir\_123, target=R03G\_15145, score=4, range=476-496,  
strand=1  
target 5' AUCAAUUGAAGUUGAAGCUUA 3'  
::: :.:.:.:.:.:.:.:.:.:.:  
query 3' UAGGUAACUUCAACGUCGAGU 5'  
query=novel\_mir\_123, target=R03G\_10797, score=4, range=476-496,  
strand=1  
target 5' AUCAACUGAAGUUGAAGCUCA 3'  
::: : :.:.:.:.:.:.:.:.:.:.:  
query 3' UAGGUAACUUCAACGUCGAGU 5'  
query=novel\_mir\_123, target=R03G\_16124, score=4, range=476-496,  
strand=1  
target 5' AUCAACUGAAGUUGAAGCUCA 3'  
::: : :.:.:.:.:.:.:.:.:.:.:  
query 3' UAGGUAACUUCAACGUCGAGU 5'  
query=novel\_mir\_123, target=R03G\_07136, score=4, range=167-187,  
strand=1  
target 5' AUCAACUGAAGUUGAAGCUCA 3'  
::: : :.:.:.:.:.:.:.:.:.:.:  
query 3' UAGGUAACUUCAACGUCGAGU 5'  
query=novel\_mir\_123, target=R03G\_13267, score=4, range=429-449,  
strand=1  
target 5' AUCAACUGAAGUUGAAGCUCA 3'  
::: : :.:.:.:.:.:.:.:.:.:.:  
query 3' UAGGUAACUUCAACGUCGAGU 5'  
query=novel\_mir\_123, target=R03G\_09918, score=4, range=72-92, str  
target 5' CACCAAUAAAGUUGCAGCUCA 3'  
::: : :.:.:.:.:.:.:.:.:.:.:  
query 3' UAGGUAACUUCAACGUCGAGU 5'  
query=novel\_mir\_123, target=R03G\_06044, score=4, range=133-152,  
strand=1  
target 5' AUCC-UUCAAGUAGCAGCUCA 3'  
:.:.:.:.:.:.:.:.:.:.: :.:.:.:.:.:.:.:.:.:.:  
query 3' UAGGUAACUUCAACGUCGAGU 5'  
query=novel\_mir\_83, target=R03G\_00684, score=1, range=1619-1641,  
strand=1  
target 5' UAUACGCACUAUCUUCUUCUUCA 3'  
:.:.:.:.:.:.:.:.:.:.: :.:.:.:.:.:.:.:.:.:.:  
query 3' AUAUGCGCGAUAGAAGAAGAAGU 5'







strand=1  
target 5' ACUG-CUGAUGAGUUCACUUAU 3'  
::: : :::::::::::::::  
query 3' GGACAGCCUACUCAAGUGAAUU 5'  
query=novel\_mir\_23, target=R03G\_13450, score=4, range=2510-2532,  
strand=1  
target 5' CUAUUGCUAACAAUGGUUCUCUA 3'  
::: : :::::::::::::::  
query 3' AAUGAUGCUUGUUACCAGGAGAU 5'  
query=novel\_mir\_30, target=R03G\_13746, score=4, range=1031-1052,  
strand=1  
target 5' CAGCUG-CUGAUGAGUUUACUUA 3'  
:: : : : :::::::::::::::  
query 3' GUGGACAGCCUACUCAAGUGAAU 5'  
query=novel\_mir\_98, target=R03G\_08830, score=2, range=15-36, stra  
target 5' CGGUCAUAACUAUCUUUUGUCA 3'  
::::: : :::::::::::::::  
query 3' GCCAGCAUUGAUAGGAAACAGU 5'  
query=novel\_mir\_74, target=R03G\_00677, score=0.5, range=497-518,  
strand=-1  
target 5' UAUCGUCUACACUCGUCCACUG 3'  
::::: : :::::::::::::::  
query 3' AUAGCAGAUGUGAGCAGGUGAU 5'  
query=novel\_mir\_74, target=R03G\_10862, score=0.5, range=467-488,  
strand=-1  
target 5' UAUCGUCUACACUCGUCCACUG 3'  
::::: : :::::::::::::::  
query 3' AUAGCAGAUGUGAGCAGGUGAU 5'  
query=novel\_mir\_74, target=R03G\_16715, score=0.5, range=395-416,  
strand=-1  
target 5' UAUCGUCUACACUCGUCCACUG 3'  
::::: : :::::::::::::::  
query 3' AUAGCAGAUGUGAGCAGGUGAU 5'  
query=novel\_mir\_74, target=R03G\_03782, score=0.5, range=326-347,  
strand=-1  
target 5' UAUCGUCUACACUCGUCCACUG 3'  
::::: : :::::::::::::::  
query 3' AUAGCAGAUGUGAGCAGGUGAU 5'  
query=novel\_mir\_74, target=R03G\_10805, score=2.5, range=944-965,  
strand=-1  
target 5' UAUCGUCUACACUCAUCCACUG 3'  
::::: : :::::::::::::::  
query 3' AUAGCAGAUGUGAGCAGGUGAU 5'  
query=novel\_mir\_74, target=R03G\_17406, score=2.5, range=296-317,  
strand=-1









query 3' GAGGAGGGGUUUUUGUAGGAGU 5'  
query=novel\_mir\_7, target=R03G\_02354, score=2, range=622-643,  
strand=-1  
target 5' CUCCUCCCCAAAAACAUCCCCA 3'  
:::::::::::::::::::: ::  
query 3' GAGGAGGGGUUUUUGUAGGAGU 5'  
query=novel\_mir\_7, target=R03G\_14722, score=2, range=622-643,  
strand=-1  
target 5' CUCCUCCCCAAAAACAUCCCCA 3'  
:::::::::::::::::::: ::  
query 3' GAGGAGGGGUUUUUGUAGGAGU 5'  
query=novel\_mir\_7, target=R03G\_05194, score=2, range=622-643,  
strand=-1  
target 5' CUCCUCCCCAAAAACAUCCCCA 3'  
:::::::::::::::::::: ::  
query 3' GAGGAGGGGUUUUUGUAGGAGU 5'  
query=novel\_mir\_7, target=R03G\_05303, score=2, range=622-643,  
strand=-1  
target 5' CUCCUCCCCAAAAACAUCCCCA 3'  
:::::::::::::::::::: ::  
query 3' GAGGAGGGGUUUUUGUAGGAGU 5'  
query=novel\_mir\_7, target=R03G\_08906, score=2, range=622-643,  
strand=-1  
target 5' CUCCUCCCCAAAAACAUCCCCA 3'  
:::::::::::::::::::: ::  
query 3' GAGGAGGGGUUUUUGUAGGAGU 5'  
query=novel\_mir\_7, target=R03G\_13672, score=2, range=622-643,  
strand=-1  
target 5' CUCCUCCCCAAAAACAUCCCCA 3'  
:::::::::::::::::::: ::  
query 3' GAGGAGGGGUUUUUGUAGGAGU 5'  
query=novel\_mir\_7, target=R03G\_01923, score=2, range=571-592,  
strand=-1  
target 5' CUCCUCCCCAAAAACAUCCCCA 3'  
:::::::::::::::::::: ::  
query 3' GAGGAGGGGUUUUUGUAGGAGU 5'  
query=novel\_mir\_7, target=R03G\_04110, score=2, range=319-340,  
strand=-1  
target 5' CUCCUCCCCAAAAACAUCCCCA 3'  
:::::::::::::::::::: ::  
query 3' GAGGAGGGGUUUUUGUAGGAGU 5'  
query=novel\_mir\_7, target=R03G\_04104, score=2, range=319-340,  
strand=-1  
target 5' CUCCUCCCCAAAAACAUCCCCA 3'  
:::::::::::::::::::: ::



query 3' GAGGAGGGGUUUUUGUAGGAGU 5'  
query=novel\_mir\_7, target=R03G\_08301, score=2, range=547-568,  
strand=-1  
target 5' CUCCUCCCCAAAAACAUCCCCA 3'  
:::::::::::::::::::: ::  
query 3' GAGGAGGGGUUUUUGUAGGAGU 5'  
query=novel\_mir\_7, target=R03G\_09279, score=2, range=295-316,  
strand=-1  
target 5' CUCCUCCCCAAAAACAUCCCCA 3'  
:::::::::::::::::::: ::  
query 3' GAGGAGGGGUUUUUGUAGGAGU 5'  
query=novel\_mir\_7, target=R03G\_08649, score=2, range=349-370,  
strand=-1  
target 5' CUCCUCCCCAAAAACAUCCCCA 3'  
:::::::::::::::::::: ::  
query 3' GAGGAGGGGUUUUUGUAGGAGU 5'  
query=novel\_mir\_7, target=R03G\_15496, score=2, range=265-286,  
strand=-1  
target 5' CUCCUCCCCAAAAACAUCCCCA 3'  
:::::::::::::::::::: ::  
query 3' GAGGAGGGGUUUUUGUAGGAGU 5'  
query=novel\_mir\_7, target=R03G\_05535, score=2, range=7-28, strand  
target 5' CUCCUCCCCAAAAACAUCCCCA 3'  
:::::::::::::::::::: ::  
query 3' GAGGAGGGGUUUUUGUAGGAGU 5'  
query=novel\_mir\_7, target=R03G\_10000, score=2, range=163-184,  
strand=-1  
target 5' CUCCUCCCCAAAAACAUCCCCA 3'  
:::::::::::::::::::: ::  
query 3' GAGGAGGGGUUUUUGUAGGAGU 5'  
query=novel\_mir\_7, target=R03G\_02936, score=2, range=620-640,  
strand=-1  
target 5' CUCCUCCCCAAAAACAUCUCA 3'  
:::::::::::::::::::: ::  
query 3' GAGGAGGGGUUUUUGUAGGAGU 5'  
query=novel\_mir\_7, target=R03G\_01636, score=2.5, range=406-427,  
strand=-1  
target 5' CUUCUCCCCAAAAACAUCCCCA 3'  
:::::::::::::::::::: ::  
query 3' GAGGAGGGGUUUUUGUAGGAGU 5'  
query=novel\_mir\_7, target=R03G\_15336, score=2.5, range=109-130,  
strand=-1  
target 5' CUCCUCCCCAAAAACAUCCCCA 3'  
:::::::::::::::::::: ::  
query 3' GAGGAGGGGUUUUUGUAGGAGU 5'

query=novel\_mir\_7, target=R03G\_10644, score=3, range=7-28, strand  
target 5' CUCCUCCCCAAAAACAUCUCCA 3'  
..... ::  
query 3' GAGGAGGGGUUUUUGUAGGAGU 5'  
query=novel\_mir\_7, target=R03G\_06976, score=3, range=88-109, strand  
target 5' CUCCUCCCCAGAAACAUCUCCA 3'  
..... ::  
query 3' GAGGAGGGGUUUUUGUAGGAGU 5'  
query=novel\_mir\_7, target=R03G\_03835, score=3, range=28-49, strand  
target 5' CUCCUCCCCAAAAUAUCUCCA 3'  
..... ::  
query 3' GAGGAGGGGUUUUUGUAGGAGU 5'  
query=novel\_mir\_7, target=R03G\_04519, score=3, range=74-94, strand  
target 5' UCCUCUCCAAAAACAUC-CA 3'  
. .... ::  
query 3' GAGGAGGGGUUUUUGUAGGAGU 5'  
query=novel\_mir\_7, target=R03G\_14467, score=3.5, range=151-172,  
strand=-1  
target 5' CUUCUCCCCAAAAACAUCUCCA 3'  
..... ::  
query 3' GAGGAGGGGUUUUUGUAGGAGU 5'  
query=novel\_mir\_7, target=R03G\_07438, score=3.5, range=319-340,  
strand=-1  
target 5' CUCCUCUCCAAAAACAUCUCCA 3'  
..... ::  
query 3' GAGGAGGGGUUUUUGUAGGAGU 5'  
query=novel\_mir\_7, target=R03G\_04312, score=3.5, range=144-165,  
strand=-1  
target 5' UUCUUCUGCAAAAACAUCUUCA 3'  
. .... ::  
query 3' GAGGAGGGGUUUUUGUAGGAGU 5'  
query=novel\_mir\_7, target=R03G\_04866, score=3.5, range=7-28, strand  
target 5' CUCCUCUCCAAAAACAUCUCCA 3'  
..... ::  
query 3' GAGGAGGGGUUUUUGUAGGAGU 5'  
query=novel\_mir\_7, target=R03G\_02927, score=4, range=461-482, strand  
target 5' CUCCAACCCAAAAUAUCCUCU 3'  
.... ::  
query 3' GAGGAGGGGUUUUUGUAGGAGU 5'  
query=novel\_mir\_7, target=R03G\_10922, score=4, range=191-212, strand  
target 5' CUCCAACCCAAAAUAUCCUCU 3'  
.... ::  
query 3' GAGGAGGGGUUUUUGUAGGAGU 5'  
query=novel\_mir\_7, target=R03G\_00780, score=4, range=175-196,  
strand=-1









query=novel\_mir\_10, target=R03G\_14273, score=4, range=431-450,  
strand=1  
target 5' UGAAGAGUGAGAAUGUGGUG 3'  
.:::: ::::::.....  
query 3' GCUUCCGACUUUUACACCAU 5'  
query=novel\_mir\_10, target=R03G\_10603, score=4, range=1716-1734,  
strand=1  
target 5' CGAA-GCUGAAAAUGUGGCC 3'  
:::: ::::::.....  
query 3' GCUUCCGACUUUUACACCAU 5'  
query=novel\_mir\_10, target=R03G\_15621, score=4, range=2559-2577,  
strand=1  
target 5' CGAA-GAUGAAAAUGUGGAA 3'  
:::: : ::::::..... :  
query 3' GCUUCCGACUUUUACACCAU 5'  
query=novel\_mir\_10, target=R03G\_13646, score=4, range=113-132,  
strand=-1  
target 5' UGAAGGUUUGAAAUGUGGUA 3'  
.::::: : ::::::.....  
query 3' GCUUCCGACUUUUACACCAU 5'  
query=novel\_mir\_100, target=R03G\_13496, score=0, range=356-376,  
strand=1  
target 5' CAACAAAACUCCUCGUUCA 3'  
::::: ::::::.....  
query 3' GUUGUUUUGAAGGAGCAAGUU 5'  
query=novel\_mir\_100, target=R03G\_13497, score=0, range=158-178,  
strand=1  
target 5' CAACAAAACUCCUCGUUCA 3'  
::::: ::::::.....  
query 3' GUUGUUUUGAAGGAGCAAGUU 5'  
query=novel\_mir\_100, target=R03G\_05190, score=1, range=68-88, str  
target 5' CAACAAAUCUCCUCGUUCA 3'  
::::: ::::::.....  
query 3' GUUGUUUUGAAGGAGCAAGUU 5'  
query=novel\_mir\_100, target=R03G\_06501, score=3, range=56-76,  
strand=-1  
target 5' CAACAAUAUCCUCGUUCA 3'  
::::: ::::::.....  
query 3' GUUGUUUUGAAGGAGCAAGUU 5'  
query=novel\_mir\_100, target=R03G\_00222, score=4, range=500-520,  
strand=-1  
target 5' CAAUAUAGCUCCUCCUUCA 3'  
::::: : ::::::..... :  
query 3' GUUGUUUUGAAGGAGCAAGUU 5'  
query=novel\_mir\_126, target=R03G\_16387, score=4, range=121-143,

strand=1  
target 5' UUACACCAACUGCGUCACAACAA 3'  
:::::::::::::::::::: ::  
query 3' AAUGUGGUUGACGCAGUGUCAUU 5'  
query=novel\_mir\_126, target=R03G\_03013, score=4, range=1830-1851,  
strand=-1  
target 5' UUUUUCUAA-UGCGUCACAGUAA 3'  
:: . :.: : :::::::::::::::  
query 3' AAUGUGGUUGACGCAGUGUCAUU 5'  
query=novel\_mir\_49, target=R03G\_12461, score=0, range=564-585,  
strand=1  
target 5' CCUACACAUGCACCAACGACUA 3'  
:::::::::::::::::::::  
query 3' GGAUGUGUACGUGGUUGCUGAU 5'  
query=novel\_mir\_49, target=R03G\_12244, score=0, range=564-585,  
strand=1  
target 5' CCUACACAUGCACCAACGACUA 3'  
:::::::::::::::::::::  
query 3' GGAUGUGUACGUGGUUGCUGAU 5'  
query=novel\_mir\_49, target=R03G\_02422, score=0, range=30-51, stra  
target 5' CCUACACAUGCACCAACGACUA 3'  
:::::::::::::::::::::  
query 3' GGAUGUGUACGUGGUUGCUGAU 5'  
query=novel\_mir\_49, target=R03G\_15370, score=0.5, range=606-627,  
strand=1  
target 5' CCUACAUUAUGCACCAACGACUA 3'  
:::::::::::::::::::::  
query 3' GGAUGUGUACGUGGUUGCUGAU 5'  
query=novel\_mir\_49, target=R03G\_07488, score=0.5, range=678-699,  
strand=1  
target 5' CCUACAUUAUGCACCAACGACUA 3'  
:::::::::::::::::::::  
query 3' GGAUGUGUACGUGGUUGCUGAU 5'  
query=novel\_mir\_49, target=R03G\_15685, score=1, range=30-51, stra  
target 5' CCUACACAUGCACCAACGACUA 3'  
:::::::::::::::::::::  
query 3' GGAUGUGUACGUGGUUGCUGAU 5'  
query=novel\_mir\_49, target=R03G\_12881, score=1.5, range=378-399,  
strand=1  
target 5' CUUACACAUGCACCAACGGCUA 3'  
:::::::::::::::::::::  
query 3' GGAUGUGUACGUGGUUGCUGAU 5'  
query=novel\_mir\_49, target=R03G\_00789, score=3, range=468-489,  
strand=1  
target 5' CCUACACAAGCACCAACCGACUA 3'



```
:::::::::: : : : : : : : : : :
query 3' GGAUGUGUACGUGGUUGCUGAU 5'
query=novel_mir_49, target=R03G_06395, score=4, range=661-682,
strand=1
target 5' UCUAUACCUCCACCAACGACUA 3'
.::::: : : : : : : : : :
query 3' GGAUGUGUACGUGGUUGCUGAU 5'
query=novel_mir_120, target=R03G_07124, score=2, range=760-782,
strand=-1
target 5' CACAUGCAGUAGUCUCCAUAUA 3'
:: : : : : : : : : :
query 3' GUUUACGACAUCAGAAGGUUAUAU 5'
query=novel_mir_120, target=R03G_09542, score=4, range=760-782,
strand=-1
target 5' CACAUGCUGUGAUCUCCAUAUA 3'
:: : : : : : : : : :
query 3' GUUUACGACAUCAGAAGGUUAUAU 5'
query=novel_mir_106, target=R03G_10991, score=0, range=4697-4719,
strand=1
target 5' AACAUAAUGUUGAACCUAAUUCA 3'
:::::::::: : : : : : : : : : :
query 3' UUGUAUUACAACUUGGAUUAAGU 5'
query=novel_mir_106, target=R03G_01944, score=0, range=4697-4719,
strand=1
target 5' AACAUAAUGUUGAACCUAAUUCA 3'
:::::::::: : : : : : : : : : :
query 3' UUGUAUUACAACUUGGAUUAAGU 5'
query=novel_mir_106, target=R03G_03749, score=0, range=4697-4719,
strand=1
target 5' AACAUAAUGUUGAACCUAAUUCA 3'
:::::::::: : : : : : : : : : :
query 3' UUGUAUUACAACUUGGAUUAAGU 5'
query=novel_mir_106, target=R03G_17287, score=0, range=4697-4719,
strand=1
target 5' AACAUAAUGUUGAACCUAAUUCA 3'
:::::::::: : : : : : : : : : :
query 3' UUGUAUUACAACUUGGAUUAAGU 5'
query=novel_mir_106, target=R03G_15573, score=0, range=4697-4719,
strand=1
target 5' AACAUAAUGUUGAACCUAAUUCA 3'
:::::::::: : : : : : : : : : :
query 3' UUGUAUUACAACUUGGAUUAAGU 5'
query=novel_mir_106, target=R03G_13849, score=0, range=4697-4719,
strand=1
target 5' AACAUAAUGUUGAACCUAAUUCA 3'
```

query 3' UUGUAUUACAACUUGGAUUAAGU 5'  
query=novel\_mir\_106, target=R03G\_06502, score=0, range=4574-4596,  
strand=1  
target 5' AACAUAAUGUUGAACCUAAUUCA 3'

query 3' UUGUAUUACAACUUGGAUUAAGU 5'  
query=novel\_mir\_106, target=R03G\_01733, score=0, range=4499-4521,  
strand=1  
target 5' AACAUAAUGUUGAACCUAAUUCA 3'

query 3' UUGUAUUACAACUUGGAUUAAGU 5'  
query=novel\_mir\_106, target=R03G\_05865, score=0, range=4349-4371,  
strand=1  
target 5' AACAUAAUGUUGAACCUAAUUCA 3'

query 3' UUGUAUUACAACUUGGAUUAAGU 5'  
query=novel\_mir\_106, target=R03G\_02966, score=0, range=3968-3990,  
strand=1  
target 5' AACAUAAUGUUGAACCUAAUUCA 3'

query 3' UUGUAUUACAACUUGGAUUAAGU 5'  
query=novel\_mir\_106, target=R03G\_02707, score=0, range=2246-2268,  
strand=1  
target 5' AACAUAAUGUUGAACCUAAUUCA 3'

query 3' UUGUAUUACAACUUGGAUUAAGU 5'  
query=novel\_mir\_106, target=R03G\_15388, score=0, range=560-582,  
strand=1  
target 5' AACAUAAUGUUGAACCUAAUUCA 3'

query 3' UUGUAUUACAACUUGGAUUAAGU 5'  
query=novel\_mir\_106, target=R03G\_07969, score=1, range=305-327,  
strand=1  
target 5' AACGUGAUGUUGAACCUAAUUCA 3'

query 3' UUGUAUUACAACUUGGAUUAAGU 5'  
query=novel\_mir\_99, target=R03G\_12532, score=1, range=3623-3644,  
strand=-1  
target 5' CCCAUAUCCGAUAAUCGACGAA 3'

query 3' GGGUAUAGGUUAUUAGCUGCUU 5'  
query=novel\_mir\_99, target=R03G\_13747, score=1, range=2408-2429,  
strand=-1  
target 5' CCCAUAUCCGAUAAUCGACGAA 3'

query 3' GGGUUAUAGGUUAUUAGCUGCUU 5'  
query=novel\_mir\_99, target=R03G\_03589, score=1, range=2109-2130,  
strand=-1  
target 5' CCCAUAUCCGAUAAUCGACGAA 3'

query 3' GGGUUAUAGGUUAUUAGCUGCUU 5'  
query=novel\_mir\_99, target=R03G\_16696, score=1, range=1206-1227,  
strand=-1  
target 5' CCCAUAUCCGAUAAUCGACGAA 3'

query 3' GGGUUAUAGGUUAUUAGCUGCUU 5'  
query=novel\_mir\_99, target=R03G\_00699, score=1, range=915-936,  
strand=-1  
target 5' CCCAUAUCCGAUAAUCGACGAA 3'

query 3' GGGUUAUAGGUUAUUAGCUGCUU 5'  
query=novel\_mir\_99, target=R03G\_05517, score=1, range=917-938,  
strand=-1  
target 5' CCCAUAUCCGAUAAUCGACGAA 3'

query 3' GGGUUAUAGGUUAUUAGCUGCUU 5'  
query=novel\_mir\_99, target=R03G\_00702, score=1, range=758-779,  
strand=-1  
target 5' CCCAUAUCCGAUAAUCGACGAA 3'

query 3' GGGUUAUAGGUUAUUAGCUGCUU 5'  
query=novel\_mir\_99, target=R03G\_03117, score=1, range=746-767,  
strand=-1  
target 5' CCCAUAUCCGAUAAUCGACGAA 3'

query 3' GGGUUAUAGGUUAUUAGCUGCUU 5'  
query=novel\_mir\_99, target=R03G\_11402, score=1, range=566-587,  
strand=-1  
target 5' CCCAUAUCCGAUAAUCGACGAA 3'

query 3' GGGUUAUAGGUUAUUAGCUGCUU 5'  
query=novel\_mir\_99, target=R03G\_03792, score=1, range=554-575,  
strand=-1  
target 5' CCCAUAUCCGAUAAUCGACGAA 3'

query 3' GGGUUAUAGGUUAUUAGCUGCUU 5'  
query=novel\_mir\_99, target=R03G\_16823, score=1, range=449-470,  
strand=-1  
target 5' CCCAUAUCCGAUAAUCGACGAA 3'

```
.....
query 3' GGGUUAUAGGUUAUUAGCUGCUU 5'
query=novel_mir_99, target=R03G_04208, score=1, range=372-393,
strand=-1
target 5' CCCAUAUCCGAUAAUCGACGAA 3'
.....
query 3' GGGUUAUAGGUUAUUAGCUGCUU 5'
query=novel_mir_99, target=R03G_05418, score=1, range=356-377,
strand=-1
target 5' CCCAUAUCCGAUAAUCGACGAA 3'
.....
query 3' GGGUUAUAGGUUAUUAGCUGCUU 5'
query=novel_mir_99, target=R03G_05513, score=1, range=197-218,
strand=-1
target 5' CCCAUAUCCGAUAAUCGACGAA 3'
.....
query 3' GGGUUAUAGGUUAUUAGCUGCUU 5'
query=novel_mir_99, target=R03G_17354, score=1, range=119-140,
strand=-1
target 5' CCCAUAUCCGAUAAUCGACGAA 3'
.....
query 3' GGGUUAUAGGUUAUUAGCUGCUU 5'
query=novel_mir_99, target=R03G_04696, score=1, range=89-110,
strand=-1
target 5' CCCAUAUCCGAUAAUCGACGAA 3'
.....
query 3' GGGUUAUAGGUUAUUAGCUGCUU 5'
query=novel_mir_99, target=R03G_11413, score=1, range=44-65, str
target 5' CCCAUAUCCGAUAAUCGACGAA 3'
.....
query 3' GGGUUAUAGGUUAUUAGCUGCUU 5'
query=novel_mir_99, target=R03G_16729, score=1.5, range=947-968,
strand=-1
target 5' UCCAUAUCCGAUAAUCGACGAA 3'
.....
query 3' GGGUUAUAGGUUAUUAGCUGCUU 5'
query=novel_mir_99, target=R03G_13716, score=2, range=246-267,
strand=-1
target 5' CCCAUAUCCGAUAAUCGAUGAA 3'
.....
query 3' GGGUUAUAGGUUAUUAGCUGCUU 5'
query=novel_mir_99, target=R03G_15153, score=4, range=135-156,
strand=-1
target 5' CCCAUAUCCGAAAAUUGACGAA 3'
.....: .....
```

query 3' GGGUAAUAGGUAAUUAGCUGCUU 5'  
query=novel\_mir\_99, target=R03G\_14910, score=4, range=1030-1052,  
strand=-1  
target 5' UUCAAAUCCAAUAAUCGACCGAA 3'  
.....  
query 3' GGGUAAUAGGUAAUUAGCU-GCUU 5'  
query=novel\_mir\_115, target=R03G\_15669, score=0, range=89-110,  
strand=1  
target 5' UGUACAUGUCGCGAGUGUUGUA 3'  
.....  
query 3' ACAUGUACAGCGCUCACAACAU 5'  
query=novel\_mir\_115, target=R03G\_14509, score=4, range=572-592,  
strand=-1  
target 5' UGU-CAUCUUGUGAGUGUUGUA 3'  
... :: :.....  
query 3' ACAUGUACAGCGCUCACAACAU 5'  
query=novel\_mir\_94, target=R03G\_16984, score=0, range=124-143,  
strand=1  
target 5' AAUUUAGCAAGUCCUUCA 3'  
.....  
query 3' UUUAAAUCGUUCAAGGAAGU 5'  
query=novel\_mir\_94, target=R03G\_16970, score=0, range=151-170,  
strand=1  
target 5' AAUUUAGCAAGUCCUUCA 3'  
.....  
query 3' UUUAAAUCGUUCAAGGAAGU 5'  
query=novel\_mir\_94, target=R03G\_12137, score=0, range=151-170,  
strand=1  
target 5' AAUUUAGCAAGUCCUUCA 3'  
.....  
query 3' UUUAAAUCGUUCAAGGAAGU 5'  
query=novel\_mir\_94, target=R03G\_04585, score=0, range=151-170,  
strand=1  
target 5' AAUUUAGCAAGUCCUUCA 3'  
.....  
query 3' UUUAAAUCGUUCAAGGAAGU 5'  
query=novel\_mir\_94, target=R03G\_04581, score=0, range=151-170,  
strand=1  
target 5' AAUUUAGCAAGUCCUUCA 3'  
.....  
query 3' UUUAAAUCGUUCAAGGAAGU 5'  
query=novel\_mir\_94, target=R03G\_09336, score=0, range=151-170,  
strand=1  
target 5' AAUUUAGCAAGUCCUUCA 3'  
.....

query 3' UUUAAAUCGUUCAAGGAAGU 5'  
query=novel\_mir\_94, target=R03G\_12751, score=1.5, range=151-170,  
strand=1  
target 5' AAGUUUAGCAAGUUUCUUCA 3'  
.....  
query 3' UUUAAAUCGUUCAAGGAAGU 5'  
query=novel\_mir\_94, target=R03G\_08674, score=1.5, range=151-170,  
strand=1  
target 5' AAGUUUAGCAAGUUUCUUCA 3'  
.....  
query 3' UUUAAAUCGUUCAAGGAAGU 5'  
query=novel\_mir\_94, target=R03G\_13228, score=1.5, range=1978-1997  
strand=1  
target 5' AAGUUUAGCAAGUUUCUUCA 3'  
.....  
query 3' UUUAAAUCGUUCAAGGAAGU 5'  
query=novel\_mir\_94, target=R03G\_05362, score=1.5, range=151-170,  
strand=1  
target 5' AAGUUUAGCAAGUUUCUUCA 3'  
.....  
query 3' UUUAAAUCGUUCAAGGAAGU 5'  
query=novel\_mir\_94, target=R03G\_14765, score=1.5, range=124-143,  
strand=1  
target 5' AAGUUUAGCAAGUUUCUUCA 3'  
.....  
query 3' UUUAAAUCGUUCAAGGAAGU 5'  
query=novel\_mir\_94, target=R03G\_14186, score=1.5, range=2389-2408  
strand=1  
target 5' AAGUUUAGCAAGUUUCUUCA 3'  
.....  
query 3' UUUAAAUCGUUCAAGGAAGU 5'  
query=novel\_mir\_94, target=R03G\_14190, score=1.5, range=2389-2408  
strand=1  
target 5' AAGUUUAGCAAGUUUCUUCA 3'  
.....  
query 3' UUUAAAUCGUUCAAGGAAGU 5'  
query=novel\_mir\_94, target=R03G\_08806, score=1.5, range=2389-2408  
strand=1  
target 5' AAGUUUAGCAAGUUUCUUCA 3'  
.....  
query 3' UUUAAAUCGUUCAAGGAAGU 5'  
query=novel\_mir\_94, target=R03G\_14870, score=1.5, range=2389-2408  
strand=1  
target 5' AAGUUUAGCAAGUUUCUUCA 3'  
.....

query 3' UUUAAAUCGUUCAAGGAAGU 5'  
query=novel\_mir\_94, target=R03G\_16108, score=1.5, range=1057-1076  
strand=1  
target 5' AAGUUUAGCAAGUUUCUUCA 3'  
::::::::::::::::::::

query 3' UUUAAAUCGUUCAAGGAAGU 5'  
query=novel\_mir\_94, target=R03G\_12469, score=1.5, range=151-170,  
strand=1  
target 5' AAGUUUAGCAAGUUUCUUCA 3'  
::::::::::::::::::::

query 3' UUUAAAUCGUUCAAGGAAGU 5'  
query=novel\_mir\_94, target=R03G\_07551, score=1.5, range=151-170,  
strand=1  
target 5' AAGUUUAGCAAGUUUCUUCA 3'  
::::::::::::::::::::

query 3' UUUAAAUCGUUCAAGGAAGU 5'  
query=novel\_mir\_94, target=R03G\_10254, score=1.5, range=124-143,  
strand=1  
target 5' AAGUUUAGCAAGUUUCUUCA 3'  
::::::::::::::::::::

query 3' UUUAAAUCGUUCAAGGAAGU 5'  
query=novel\_mir\_94, target=R03G\_00367, score=1.5, range=151-170,  
strand=1  
target 5' AAGUUUAGCAAGUUUCUUCA 3'  
::::::::::::::::::::

query 3' UUUAAAUCGUUCAAGGAAGU 5'  
query=novel\_mir\_94, target=R03G\_07245, score=1.5, range=151-170,  
strand=1  
target 5' AAGUUUAGCAAGUUUCUUCA 3'  
::::::::::::::::::::

query 3' UUUAAAUCGUUCAAGGAAGU 5'  
query=novel\_mir\_94, target=R03G\_15930, score=2, range=259-278,  
strand=1  
target 5' AAGUUUAGCAAGUUUCUUCG 3'  
::::::::::::::::::::

query 3' UUUAAAUCGUUCAAGGAAGU 5'  
query=novel\_mir\_94, target=R03G\_05002, score=2.5, range=151-170,  
strand=1  
target 5' AAGUUUAGUAAGUUUCUUCA 3'  
::::::::::::::::::::

query 3' UUUAAAUCGUUCAAGGAAGU 5'  
query=novel\_mir\_94, target=R03G\_05039, score=2.5, range=238-257,  
strand=1  
target 5' AAGUUUAGCAAAUCCUUCA 3'  
:::::::::::: : :::::





query 3' UUUAAAUCGUUCAAGGAAGU 5'  
query=novel\_mir\_94, target=R03G\_03703, score=4, range=1023-1042,  
strand=1  
target 5' AAAAAUAGCAAGUCCUUUU 3'  
::: :::::::::::::::  
query 3' UUUAAAUCGUUCAAGGAAGU 5'  
query=novel\_mir\_94, target=R03G\_14692, score=4, range=1102-1120,  
strand=1  
target 5' ACAUUU-GCAAGUUCAUUCA 3'  
: :::: ::::::::::: ::::  
query 3' UUUAAAUCGUUCAAGGAAGU 5'  
query=novel\_mir\_94, target=R03G\_11427, score=4, range=590-609,  
strand=-1  
target 5' GGAUUUAGCAGCUUCCUUCA 3'  
.....: :::::::::::  
query 3' UUUAAAUCGUUCAAGGAAGU 5'  
query=novel\_mir\_94, target=R03G\_10208, score=4, range=9-29, stran  
target 5' AAAUUUUGCAAAGUUUCUUCA 3'  
:::::: :: :::::::::::::::  
query 3' UUUAAAUCG-UUCAAGGAAGU 5'  
query=novel\_mir\_94, target=R03G\_11701, score=4, range=3734-3753,  
strand=-1  
target 5' ACAUUCAGCAAGUCCUUUU 3'  
: ::: :::::::::::::::  
query 3' UUUAAAUCGUUCAAGGAAGU 5'  
query=novel\_mir\_94, target=R03G\_17090, score=4, range=1008-1027,  
strand=-1  
target 5' AAACAUUGCAAGUUUCUUCA 3'  
::: : :::::::::::::::  
query 3' UUUAAAUCGUUCAAGGAAGU 5'  
query=novel\_mir\_94, target=R03G\_00329, score=4, range=345-363,  
strand=-1  
target 5' AACCUUAGCAAGUU-CUUCA 3'  
:: ::::::::::::::: :::::  
query 3' UUUAAAUCGUUCAAGGAAGU 5'  
query=novel\_mir\_66, target=R03G\_00258, score=2, range=84-105,  
strand=-1  
target 5' UCCACCCCAGAAUAUUCUAAUA 3'  
:::::: :::::::::::::::  
query 3' AGGUGAGGUCUUAUAAGGUUAU 5'  
query=novel\_mir\_66, target=R03G\_16003, score=3.5, range=304-325,  
strand=1  
target 5' UCCAAUCCAGAAUAUGCCAAUG 3'  
::::: ::::::::::::::: ::::::.  
query 3' AGGUGAGGUCUUAUAAGGUUAU 5'





target 5' CUAUCAGAGCUGCUCUUUCUA 3'  
:: :: : ::::::::::::::  
query 3' GA-AGACACGACGAGAGAGAU 5'  
query=novel\_mir\_81, target=R03G\_00461, score=3, range=140-162,  
strand=-1  
target 5' GGCAUAAAUGACCAAAGUGAUA 3'  
: :::::::::::::::  
query 3' ACAUAAUUUACUGGUUUCGCUAU 5'  
query=novel\_mir\_82, target=R03G\_01747, score=1, range=18-39, stra  
target 5' GUUUUGUGACCUACUGUAUGUA 3'  
:::::::::::::  
query 3' CAAAACACUGGAUGACAUAUUAU 5'  
query=novel\_mir\_82, target=R03G\_15894, score=2, range=552-573,  
strand=1  
target 5' GUUUUUUGACCUACUGUAUAUC 3'  
::::: ::::::::::::::  
query 3' CAAAACACUGGAUGACAUAUUAU 5'  
query=novel\_mir\_82, target=R03G\_04206, score=2.5, range=18-39,  
strand=1  
target 5' GUUUUGUGACCUACUGUAUCUG 3'  
::::::::::::: :.  
query 3' CAAAACACUGGAUGACAUAUUAU 5'  
query=novel\_mir\_82, target=R03G\_04208, score=2.5, range=243-264,  
strand=-1  
target 5' GUUUUGUGACCUACUGUAGAUG 3'  
::::::::::::: :.  
query 3' CAAAACACUGGAUGACAUAUUAU 5'  
query=novel\_mir\_82, target=R03G\_12178, score=2.5, range=660-681,  
strand=-1  
target 5' GUUUUUUGACCUACUGUAUGUG 3'  
::::: ::::::::::::::.  
query 3' CAAAACACUGGAUGACAUAUUAU 5'  
query=novel\_mir\_82, target=R03G\_10788, score=3, range=18-39, stra  
target 5' GUUUUUUGACCUACUGUAUGUU 3'  
::::: :::::::::::::::  
query 3' CAAAACACUGGAUGACAUAUUAU 5'  
query=novel\_mir\_82, target=R03G\_15273, score=3, range=183-204,  
strand=1  
target 5' UUUUUUUGACCUACUGUAUAUC 3'  
::::: ::::::::::::::  
query 3' CAAAACACUGGAUGACAUAUUAU 5'  
query=novel\_mir\_82, target=R03G\_12532, score=3, range=3494-3515,  
strand=-1  
target 5' GUUUUGUGACCUACUGUACGUA 3'  
::::::::::::: :.

query 3' CAAAACACUGGAUGACAUAUUAU 5'  
query=novel\_mir\_82, target=R03G\_05626, score=3, range=1262-1283,  
strand=-1  
target 5' GUUUUUUGACCUACUGUAUGUU 3'  
::::: :::::::::::::::  
query 3' CAAAACACUGGAUGACAUAUUAU 5'  
query=novel\_mir\_82, target=R03G\_07742, score=3, range=252-273,  
strand=-1  
target 5' GUUUUGUGACCUACUGUACAUC 3'  
::::: ::::::::::::::: ::  
query 3' CAAAACACUGGAUGACAUAUUAU 5'  
query=novel\_mir\_82, target=R03G\_05625, score=3.5, range=26-47,  
strand=1  
target 5' GUUUUUUGACCUACUGUAAAUG 3'  
::::: ::::::::::::::: ::.  
query 3' CAAAACACUGGAUGACAUAUUAU 5'  
query=novel\_mir\_82, target=R03G\_01415, score=3.5, range=424-445,  
strand=1  
target 5' GUUUUGAGACCUACUGUAGAUG 3'  
::::: ::::::::::::::: ::.  
query 3' CAAAACACUGGAUGACAUAUUAU 5'  
query=novel\_mir\_82, target=R03G\_06720, score=3.5, range=404-425,  
strand=-1  
target 5' GUUUUGUGACCUACUGUAGGUG 3'  
::::: ::::::::::::::: ::.  
query 3' CAAAACACUGGAUGACAUAUUAU 5'  
query=novel\_mir\_82, target=R03G\_16696, score=3.5, range=1077-1098  
strand=-1  
target 5' GUUUUUUGACCUACUGUACAUG 3'  
::::: ::::::::::::::: ::.  
query 3' CAAAACACUGGAUGACAUAUUAU 5'  
query=novel\_mir\_82, target=R03G\_15000, score=3.5, range=1007-1028  
strand=-1  
target 5' GUUUUUUGACCUACUGUACAUG 3'  
::::: ::::::::::::::: ::.  
query 3' CAAAACACUGGAUGACAUAUUAU 5'  
query=novel\_mir\_82, target=R03G\_03117, score=3.5, range=617-638,  
strand=-1  
target 5' GUUUUUUGACCUACUGUAUAAG 3'  
::::: ::::::::::::::: .  
query 3' CAAAACACUGGAUGACAUAUUAU 5'  
query=novel\_mir\_82, target=R03G\_16142, score=4, range=105-126,  
strand=1  
target 5' GUUUUUUGACCUACUGUAUGCA 3'  
::::: ::::::::::::::: . :

query 3' CAAAACACUGGAUGACAUAUUAU 5'  
query=novel\_mir\_82, target=R03G\_17383, score=4, range=26-46, strand=1  
target 5' GUUUUUUGACCUACUGUA-AUU 3'  
::::: ::::::::::::::: ::  
query 3' CAAAACACUGGAUGACAUAUUAU 5'  
query=novel\_mir\_82, target=R03G\_00261, score=4, range=285-306,  
strand=-1  
target 5' GUUUUGUGACCUACUGUAAGUU 3'  
::::::::::::::::::: .:  
query 3' CAAAACACUGGAUGACAUAUUAU 5'  
query=novel\_mir\_82, target=R03G\_05418, score=4, range=227-248,  
strand=-1  
target 5' GUUUUGUGACCUACUGUAAGUU 3'  
::::::::::::::::::: .:  
query 3' CAAAACACUGGAUGACAUAUUAU 5'  
query=novel\_mir\_82, target=R03G\_17384, score=4, range=3452-3473,  
strand=-1  
target 5' GUUUUUUGACCUACUGUAUAGU 3'  
::::: ::::::::::::::: ::  
query 3' CAAAACACUGGAUGACAUAUUAU 5'  
query=novel\_mir\_82, target=R03G\_00241, score=4, range=1778-1799,  
strand=-1  
target 5' GUUUUUUGACCUACUGUACGUA 3'  
::::: ::::::::::::::: .::  
query 3' CAAAACACUGGAUGACAUAUUAU 5'  
query=novel\_mir\_82, target=R03G\_00296, score=4, range=1778-1799,  
strand=-1  
target 5' GUUUUUUGACCUACUGUACGUA 3'  
::::: ::::::::::::::: .::  
query 3' CAAAACACUGGAUGACAUAUUAU 5'  
query=novel\_mir\_82, target=R03G\_03589, score=4, range=1981-2001,  
strand=-1  
target 5' GUUUUGUGACCUACUGUA-GUC 3'  
::::::::::::::::::: .:  
query 3' CAAAACACUGGAUGACAUAUUAU 5'  
query=novel\_mir\_82, target=R03G\_13716, score=4, range=117-138,  
strand=-1  
target 5' GUUUUGUGACCUACUGUACCUA 3'  
::::::::::::::::::: ::  
query 3' CAAAACACUGGAUGACAUAUUAU 5'  
query=novel\_mir\_61, target=R03G\_01842, score=2, range=676-695,  
strand=1  
target 5' CCACAUUAUGAAAGGCCACUA 3'  
:: ::::::::::::::: ::  
query 3' GGCUUAUACUUUCCGGUGAU 5'

query=novel\_mir\_61, target=R03G\_11364, score=2, range=898-917,  
strand=1  
target 5' CCACAU AUGAAAGGCCACUA 3'  
:: ::::::::::::::::::::  
query 3' GGCUUAUACUUUCCGGUGAU 5'  
query=novel\_mir\_61, target=R03G\_01465, score=2, range=241-260,  
strand=1  
target 5' CCACAU AUGAAAGGCCACUA 3'  
:: ::::::::::::::::::::  
query 3' GGCUUAUACUUUCCGGUGAU 5'  
query=novel\_mir\_61, target=R03G\_17048, score=3, range=28-47, stra  
target 5' CCGCAU AUGAAAGGUUACUA 3'  
::: ::::::::::::::::::::  
query 3' GGCUUAUACUUUCCGGUGAU 5'  
query=novel\_mir\_61, target=R03G\_16382, score=3, range=1054-1073,  
strand=1  
target 5' CCGAACAU GAAAGGUCAUUA 3'  
::::: ::::::::::::::::::::  
query 3' GGCUUAUACUUUCCGGUGAU 5'  
query=novel\_mir\_61, target=R03G\_15794, score=3, range=241-260,  
strand=1  
target 5' CCACAU AUGAAAGGUCACUA 3'  
:: ::::::::::::::::::::  
query 3' GGCUUAUACUUUCCGGUGAU 5'  
query=novel\_mir\_61, target=R03G\_12457, score=3, range=922-941,  
strand=1  
target 5' CCGCACAUGAAAGGUCACUA 3'  
::: : ::::::::::::::::::::  
query 3' GGCUUAUACUUUCCGGUGAU 5'  
query=novel\_mir\_61, target=R03G\_11199, score=3, range=904-923,  
strand=1  
target 5' CCACAU AUGAAAGGCUACUA 3'  
:: ::::::::::::::::::::  
query 3' GGCUUAUACUUUCCGGUGAU 5'  
query=novel\_mir\_61, target=R03G\_08570, score=3, range=13-32, stra  
target 5' CCGCACAUGAAAGGUCACUA 3'  
::: : ::::::::::::::::::::  
query 3' GGCUUAUACUUUCCGGUGAU 5'  
query=novel\_mir\_61, target=R03G\_15207, score=3, range=240-260,  
strand=1  
target 5' CCUACAU AUGAAAGGUCACUA 3'  
:: : ::::::::::::::::::::  
query 3' GGCU-UAUACUUUCCGGUGAU 5'  
query=novel\_mir\_61, target=R03G\_15743, score=3, range=195-213,  
strand=-1







strand=-1  
target 5' AACGUAAUUUGUCCAAAGGCGCA 3'  
.....  
query 3' UUGUAUAAAACAGGUUCCGCGU 5'  
query=novel\_mir\_91, target=R03G\_14347, score=0.5, range=2826-2848  
strand=-1  
target 5' AACGUAAUUUGUCCAAAGGCGCA 3'  
.....  
query 3' UUGUAUAAAACAGGUUCCGCGU 5'  
query=novel\_mir\_91, target=R03G\_16539, score=0.5, range=2787-2809  
strand=-1  
target 5' AACGUAAUUUGUCCAAAGGCGCA 3'  
.....  
query 3' UUGUAUAAAACAGGUUCCGCGU 5'  
query=novel\_mir\_91, target=R03G\_12538, score=0.5, range=2787-2809  
strand=-1  
target 5' AACGUAAUUUGUCCAAAGGCGCA 3'  
.....  
query 3' UUGUAUAAAACAGGUUCCGCGU 5'  
query=novel\_mir\_91, target=R03G\_10804, score=0.5, range=2736-2758  
strand=-1  
target 5' AACGUAAUUUGUCCAAAGGCGCA 3'  
.....  
query 3' UUGUAUAAAACAGGUUCCGCGU 5'  
query=novel\_mir\_91, target=R03G\_07311, score=0.5, range=2736-2758  
strand=-1  
target 5' AACGUAAUUUGUCCAAAGGCGCA 3'  
.....  
query 3' UUGUAUAAAACAGGUUCCGCGU 5'  
query=novel\_mir\_91, target=R03G\_01614, score=0.5, range=2736-2758  
strand=-1  
target 5' AACGUAAUUUGUCCAAAGGCGCA 3'  
.....  
query 3' UUGUAUAAAACAGGUUCCGCGU 5'  
query=novel\_mir\_91, target=R03G\_09547, score=0.5, range=2730-2752  
strand=-1  
target 5' AACGUAAUUUGUCCAAAGGCGCA 3'  
.....  
query 3' UUGUAUAAAACAGGUUCCGCGU 5'  
query=novel\_mir\_91, target=R03G\_16361, score=0.5, range=2730-2752  
strand=-1  
target 5' AACGUAAUUUGUCCAAAGGCGCA 3'  
.....  
query 3' UUGUAUAAAACAGGUUCCGCGU 5'  
query=novel\_mir\_91, target=R03G\_06425, score=0.5, range=2730-2752

strand=-1  
target 5' AACGUAAUUUGUCCAAAGGCGCA 3'  
.....  
query 3' UUGUAUAAAACAGGUUCCGCGU 5'  
query=novel\_mir\_91, target=R03G\_05330, score=0.5, range=2730-2752  
strand=-1  
target 5' AACGUAAUUUGUCCAAAGGCGCA 3'  
.....  
query 3' UUGUAUAAAACAGGUUCCGCGU 5'  
query=novel\_mir\_91, target=R03G\_02704, score=0.5, range=2730-2752  
strand=-1  
target 5' AACGUAAUUUGUCCAAAGGCGCA 3'  
.....  
query 3' UUGUAUAAAACAGGUUCCGCGU 5'  
query=novel\_mir\_91, target=R03G\_12677, score=0.5, range=2730-2752  
strand=-1  
target 5' AACGUAAUUUGUCCAAAGGCGCA 3'  
.....  
query 3' UUGUAUAAAACAGGUUCCGCGU 5'  
query=novel\_mir\_91, target=R03G\_17021, score=0.5, range=2730-2752  
strand=-1  
target 5' AACGUAAUUUGUCCAAAGGCGCA 3'  
.....  
query 3' UUGUAUAAAACAGGUUCCGCGU 5'  
query=novel\_mir\_91, target=R03G\_04933, score=0.5, range=2730-2752  
strand=-1  
target 5' AACGUAAUUUGUCCAAAGGCGCA 3'  
.....  
query 3' UUGUAUAAAACAGGUUCCGCGU 5'  
query=novel\_mir\_91, target=R03G\_04126, score=0.5, range=2889-2911  
strand=-1  
target 5' AACGUAAUUUGUCCAAAGGCGCA 3'  
.....  
query 3' UUGUAUAAAACAGGUUCCGCGU 5'  
query=novel\_mir\_91, target=R03G\_05344, score=0.5, range=2556-2578  
strand=-1  
target 5' AACGUAAUUUGUCCAAAGGCGCA 3'  
.....  
query 3' UUGUAUAAAACAGGUUCCGCGU 5'  
query=novel\_mir\_91, target=R03G\_03778, score=0.5, range=2688-2710  
strand=-1  
target 5' AACGUAAUUUGUCCAAAGGCGCA 3'  
.....  
query 3' UUGUAUAAAACAGGUUCCGCGU 5'  
query=novel\_mir\_91, target=R03G\_12673, score=0.5, range=2031-2053

strand=-1  
target 5' AACGUAAUUUGUCCAAAGGCGCA 3'  
.....  
query 3' UUGUAUAAAACAGGUUCCGCGU 5'  
query=novel\_mir\_91, target=R03G\_17422, score=0.5, range=2031-2053  
strand=-1  
target 5' AACGUAAUUUGUCCAAAGGCGCA 3'  
.....  
query 3' UUGUAUAAAACAGGUUCCGCGU 5'  
query=novel\_mir\_91, target=R03G\_12532, score=0.5, range=2736-2758  
strand=-1  
target 5' AACGUAAUUUGUCCAAAGGCGCA 3'  
.....  
query 3' UUGUAUAAAACAGGUUCCGCGU 5'  
query=novel\_mir\_91, target=R03G\_01936, score=0.5, range=2736-2758  
strand=-1  
target 5' AACGUAAUUUGUCCAAAGGCGCA 3'  
.....  
query 3' UUGUAUAAAACAGGUUCCGCGU 5'  
query=novel\_mir\_91, target=R03G\_03619, score=0.5, range=2622-2644  
strand=-1  
target 5' AACGUAAUUUGUCCAAAGGCGCA 3'  
.....  
query 3' UUGUAUAAAACAGGUUCCGCGU 5'  
query=novel\_mir\_91, target=R03G\_09493, score=0.5, range=1554-1576  
strand=-1  
target 5' AACGUAAUUUGUCCAAAGGCGCA 3'  
.....  
query 3' UUGUAUAAAACAGGUUCCGCGU 5'  
query=novel\_mir\_91, target=R03G\_02821, score=0.5, range=2895-2917  
strand=-1  
target 5' AACGUAAUUUGUCCAAAGGCGCA 3'  
.....  
query 3' UUGUAUAAAACAGGUUCCGCGU 5'  
query=novel\_mir\_91, target=R03G\_05515, score=0.5, range=1725-1747  
strand=-1  
target 5' AACGUAAUUUGUCCAAAGGCGCA 3'  
.....  
query 3' UUGUAUAAAACAGGUUCCGCGU 5'  
query=novel\_mir\_91, target=R03G\_00241, score=0.5, range=1020-1042  
strand=-1  
target 5' AACGUAAUUUGUCCAAAGGCGCA 3'  
.....  
query 3' UUGUAUAAAACAGGUUCCGCGU 5'  
query=novel\_mir\_91, target=R03G\_00296, score=0.5, range=1020-1042





target 5' UUUGAUAUCCAAGAAGGCCAGUG 3'  
: : : : : : : : : : : : : : : : : .  
query 3' AAACUAUAGAUUCUUCGGUCCU 5'  
query=novel\_mir\_20, target=R03G\_12456, score=3.5, range=323-345,  
strand=-1  
target 5' UUUGAUAUCCAAGAAGGCCAGUG 3'  
: : : : : : : : : : : : : : : : : .  
query 3' AAACUAUAGAUUCUUCGGUCCU 5'  
query=novel\_mir\_20, target=R03G\_01653, score=3.5, range=377-399,  
strand=-1  
target 5' UUUGAUAUCCAAGAAGGCCAGUG 3'  
: : : : : : : : : : : : : : : : : .  
query 3' AAACUAUAGAUUCUUCGGUCCU 5'  
query=novel\_mir\_20, target=R03G\_08181, score=3.5, range=98-120,  
strand=-1  
target 5' UUUGAUAUCCAAGAAGGCCAGUG 3'  
: : : : : : : : : : : : : : : : : .  
query 3' AAACUAUAGAUUCUUCGGUCCU 5'  
query=novel\_mir\_20, target=R03G\_03515, score=3.5, range=38-60,  
strand=-1  
target 5' UUUGAUAUCCAAGAAGGCCAGUG 3'  
: : : : : : : : : : : : : : : : : .  
query 3' AAACUAUAGAUUCUUCGGUCCU 5'  
query=novel\_mir\_20, target=R03G\_00149, score=3.5, range=341-363,  
strand=-1  
target 5' UUUGAUAUCCAAGAAGGCCAGUG 3'  
: : : : : : : : : : : : : : : : : .  
query 3' AAACUAUAGAUUCUUCGGUCCU 5'  
query=novel\_mir\_20, target=R03G\_00134, score=3.5, range=341-363,  
strand=-1  
target 5' UUUGAUAUCCAAGAAGGCCAGUG 3'  
: : : : : : : : : : : : : : : : : .  
query 3' AAACUAUAGAUUCUUCGGUCCU 5'  
query=novel\_mir\_92, target=R03G\_12063, score=1, range=1268-1289,  
strand=-1  
target 5' UGUCGAUCCAAUUUCCAAGCA 3'  
: : : : : : : : : : : : : : : : : .  
query 3' ACAGCUACGUUAAAAGGUUCGU 5'  
query=novel\_mir\_92, target=R03G\_03622, score=1, range=1499-1520,  
strand=-1  
target 5' UGUCGAUCCAAUUUCCAAGCA 3'  
: : : : : : : : : : : : : : : : : .  
query 3' ACAGCUACGUUAAAAGGUUCGU 5'  
query=novel\_mir\_92, target=R03G\_07712, score=1, range=272-293,  
strand=-1





query 3' UGUUAAAACACCCAGUGACAUAU 5'  
query=novel\_mir\_34, target=R03G\_10719, score=4, range=1886-1908,  
strand=-1  
target 5' ACAGUUUUGGGAGUCACUGUAUG 3'  
query 3' UGUUAAAACACCCAGUGACAUAU 5'  
query=novel\_mir\_34, target=R03G\_16920, score=4, range=640-662,  
strand=-1  
target 5' ACAGUUUUGGGAGUCACUGUAUG 3'  
query 3' UGUUAAAACACCCAGUGACAUAU 5'  
query=novel\_mir\_11, target=R03G\_09894, score=3.5, range=2485-2507  
strand=1  
target 5' UCCAAAUCAUUUAAAGAACGACA 3'  
query 3' GGGUCUAGUCAAUUUCUUGUUGU 5'  
query=novel\_mir\_11, target=R03G\_06217, score=4, range=549-571,  
strand=1  
target 5' CCCAGAGUGGUUAGAGAACAUA 3'  
query 3' GGGUCUAGUCAAUUUCUUGUUGU 5'  
query=novel\_mir\_11, target=R03G\_13925, score=4, range=127-148,  
strand=1  
target 5' CUUA-AUCAGUAAAGAACAAGA 3'  
query 3' GGGUCUAGUCAAUUUCUUGUUGU 5'  
query=novel\_mir\_6, target=R03G\_08103, score=0, range=32-53, stran  
target 5' UGUUUCUCGAUCUUUGUUUCUA 3'  
query 3' ACAAAGAGCUAGAAACAAAGAU 5'  
query=novel\_mir\_6, target=R03G\_14524, score=0.5, range=2-23, stra  
target 5' UGUUUCUUGAUCUUUGUUUCUA 3'  
query 3' ACAAAGAGCUAGAAACAAAGAU 5'  
query=novel\_mir\_6, target=R03G\_00310, score=1.5, range=32-53, str  
target 5' UGUUUCUUGAUCUUUGUUUUUA 3'  
query 3' ACAAAGAGCUAGAAACAAAGAU 5'  
query=novel\_mir\_6, target=R03G\_10558, score=1.5, range=2103-2124,  
strand=-1  
target 5' UGUUUCUUGAUCUUUGUUUUUA 3'  
query 3' ACAAAGAGCUAGAAACAAAGAU 5'  
query=novel\_mir\_6, target=R03G\_02684, score=1.5, range=192-213,

```

strand=-1
target 5' UGUUUCUUGAUCUUUGUUUUUA 3'
::::::::::::::::::::
query 3' ACAAAGAGCUAGAAACAAAGAU 5'
query=novel_mir_6, target=R03G_04129, score=1.5, range=92-113,
strand=-1
target 5' UGUUUCUUGAUCUUUGUUUUUA 3'
::::::::::::::::::::
query 3' ACAAAGAGCUAGAAACAAAGAU 5'
query=novel_mir_6, target=R03G_16620, score=3, range=603-625, str
target 5' UGUGUUAUUGAUCUUUGUUUCUG 3'
::: :: ::::::::::::::.
query 3' ACA-AAGAGCUAGAAACAAAGAU 5'
query=novel_mir_6, target=R03G_03532, score=3.5, range=1041-1061,
strand=-1
target 5' UG-UUCUUCAUCUUUGUUUCUC 3'
:: ::::: ::::::::::::::
query 3' ACAAAGAGCUAGAAACAAAGAU 5'
query=novel_mir_6, target=R03G_04477, score=4, range=2975-2996,
strand=-1
target 5' GGUUUAUCGAACUUUGUUUCUA 3'
:::: ::::: ::::::::::::::
query 3' ACAAAGAGCUAGAAACAAAGAU 5'
query=novel_mir_6, target=R03G_08401, score=4, range=96-117, stra
target 5' ACUUUCCUGAUCUUUGUUUCUG 3'
::::: .::::::::::::.
query 3' ACAAAGAGCUAGAAACAAAGAU 5'
query=novel_mir_60, target=R03G_00634, score=4, range=232-252,
strand=-1
target 5' UUGU-AACGUCUGUACCGGACA 3'
::::: ::::::::::::::
query 3' AGCAGUUGUAGACGUGGUCUGU 5'
query=novel_mir_60, target=R03G_02669, score=4, range=241-261,
strand=-1
target 5' UUGU-AACGUCUGUACCGGACA 3'
::::: ::::::::::::::
query 3' AGCAGUUGUAGACGUGGUCUGU 5'
query=novel_mir_89, target=R03G_11534, score=1, range=563-584,
strand=-1
target 5' UACGUCAUGCACCCCCACAUCA 3'
::::::::::::::::::::
query 3' UUGCAGUACGUGGGGUGUAGU 5'
query=novel_mir_89, target=R03G_01951, score=1, range=563-584,
strand=-1
target 5' UACGUCAUGCACCCCCACAUCA 3'

```

query 3' UUGCAGUACGUGGGGGUGUAGU 5'  
query=novel\_mir\_89, target=R03G\_15154, score=1, range=563-584,  
strand=-1  
target 5' UACGUCAUGCACCCCCACAUCA 3'

query 3' UUGCAGUACGUGGGGGUGUAGU 5'  
query=novel\_mir\_89, target=R03G\_03987, score=1, range=563-584,  
strand=-1  
target 5' UACGUCAUGCACCCCCACAUCA 3'

query 3' UUGCAGUACGUGGGGGUGUAGU 5'  
query=novel\_mir\_89, target=R03G\_17409, score=1, range=563-584,  
strand=-1  
target 5' UACGUCAUGCACCCCCACAUCA 3'

query 3' UUGCAGUACGUGGGGGUGUAGU 5'  
query=novel\_mir\_89, target=R03G\_10044, score=1, range=563-584,  
strand=-1  
target 5' UACGUCAUGCACCCCCACAUCA 3'

query 3' UUGCAGUACGUGGGGGUGUAGU 5'  
query=novel\_mir\_89, target=R03G\_11244, score=1, range=563-584,  
strand=-1  
target 5' UACGUCAUGCACCCCCACAUCA 3'

query 3' UUGCAGUACGUGGGGGUGUAGU 5'  
query=novel\_mir\_89, target=R03G\_01950, score=1, range=563-584,  
strand=-1  
target 5' UACGUCAUGCACCCCCACAUCA 3'

query 3' UUGCAGUACGUGGGGGUGUAGU 5'  
query=novel\_mir\_89, target=R03G\_11948, score=1, range=563-584,  
strand=-1  
target 5' UACGUCAUGCACCCCCACAUCA 3'

query 3' UUGCAGUACGUGGGGGUGUAGU 5'  
query=novel\_mir\_89, target=R03G\_09199, score=1, range=563-584,  
strand=-1  
target 5' UACGUCAUGCACCCCCACAUCA 3'

query 3' UUGCAGUACGUGGGGGUGUAGU 5'  
query=novel\_mir\_89, target=R03G\_10720, score=1, range=563-584,  
strand=-1  
target 5' UACGUCAUGCACCCCCACAUCA 3'

query 3' UUGCAGUACGUGGGGGUGUAGU 5'  
query=novel\_mir\_89, target=R03G\_01194, score=1, range=563-584,  
strand=-1  
target 5' UACGUCAUGCACCCCCACAUCA 3'

query 3' UUGCAGUACGUGGGGGUGUAGU 5'  
query=novel\_mir\_89, target=R03G\_09924, score=1, range=563-584,  
strand=-1  
target 5' UACGUCAUGCACCCCCACAUCA 3'

query 3' UUGCAGUACGUGGGGGUGUAGU 5'  
query=novel\_mir\_89, target=R03G\_13447, score=1, range=563-584,  
strand=-1  
target 5' UACGUCAUGCACCCCCACAUCA 3'

query 3' UUGCAGUACGUGGGGGUGUAGU 5'  
query=novel\_mir\_89, target=R03G\_12526, score=1, range=563-584,  
strand=-1  
target 5' UACGUCAUGCACCCCCACAUCA 3'

query 3' UUGCAGUACGUGGGGGUGUAGU 5'  
query=novel\_mir\_89, target=R03G\_15873, score=1, range=563-584,  
strand=-1  
target 5' UACGUCAUGCACCCCCACAUCA 3'

query 3' UUGCAGUACGUGGGGGUGUAGU 5'  
query=novel\_mir\_89, target=R03G\_07683, score=1, range=563-584,  
strand=-1  
target 5' UACGUCAUGCACCCCCACAUCA 3'

query 3' UUGCAGUACGUGGGGGUGUAGU 5'  
query=novel\_mir\_89, target=R03G\_05916, score=1, range=563-584,  
strand=-1  
target 5' UACGUCAUGCACCCCCACAUCA 3'

query 3' UUGCAGUACGUGGGGGUGUAGU 5'  
query=novel\_mir\_89, target=R03G\_01313, score=1, range=563-584,  
strand=-1  
target 5' UACGUCAUGCACCCCCACAUCA 3'

query 3' UUGCAGUACGUGGGGGUGUAGU 5'  
query=novel\_mir\_89, target=R03G\_03558, score=1, range=563-584,  
strand=-1  
target 5' UACGUCAUGCACCCCCACAUCA 3'

query 3' UUGCAGUACGUGGGGGUGUAGU 5'  
query=novel\_mir\_89, target=R03G\_07994, score=1, range=563-584,  
strand=-1  
target 5' UACGUCAUGCACCCCCACAUCA 3'

query 3' UUGCAGUACGUGGGGGUGUAGU 5'  
query=novel\_mir\_89, target=R03G\_13706, score=1, range=521-542,  
strand=-1  
target 5' UACGUCAUGCACCCCCACAUCA 3'

query 3' UUGCAGUACGUGGGGGUGUAGU 5'  
query=novel\_mir\_89, target=R03G\_01735, score=1, range=563-584,  
strand=-1  
target 5' UACGUCAUGCACCCCCACAUCA 3'

query 3' UUGCAGUACGUGGGGGUGUAGU 5'  
query=novel\_mir\_89, target=R03G\_17211, score=1, range=563-584,  
strand=-1  
target 5' UACGUCAUGCACCCCCACAUCA 3'

query 3' UUGCAGUACGUGGGGGUGUAGU 5'  
query=novel\_mir\_89, target=R03G\_07295, score=1, range=395-416,  
strand=-1  
target 5' UACGUCAUGCACCCCCACAUCA 3'

query 3' UUGCAGUACGUGGGGGUGUAGU 5'  
query=novel\_mir\_89, target=R03G\_12172, score=1, range=563-584,  
strand=-1  
target 5' UACGUCAUGCACCCCCACAUCA 3'

query 3' UUGCAGUACGUGGGGGUGUAGU 5'  
query=novel\_mir\_89, target=R03G\_08838, score=1, range=563-584,  
strand=-1  
target 5' UACGUCAUGCACCCCCACAUCA 3'

query 3' UUGCAGUACGUGGGGGUGUAGU 5'  
query=novel\_mir\_89, target=R03G\_03617, score=2, range=563-584,  
strand=-1  
target 5' UACGUCAUGCAUCCCCACAUCA 3'

query 3' UUGCAGUACGUGGGGGUGUAGU 5'  
query=novel\_mir\_89, target=R03G\_13141, score=3.5, range=566-587,  
strand=-1  
target 5' UAUGUAAUACACCCCCACAUCA 3'

```
:::: :: ::::::::::::::
query 3' UUGCAGUACGUGGGGGUGUAGU 5'
query=novel_mir_89, target=R03G_12056, score=4, range=155-176,
strand=1
target 5' GCUGUCAUGCAACCCCACAUCA 3'
. ::::::::::: :::::::::::
query 3' UUGCAGUACGUGGGGGUGUAGU 5'
query=novel_mir_89, target=R03G_03770, score=4, range=167-188,
strand=1
target 5' GCUGUCAUGCAACCCCACAUCA 3'
. ::::::::::: :::::::::::
query 3' UUGCAGUACGUGGGGGUGUAGU 5'
query=novel_mir_89, target=R03G_13728, score=4, range=491-512,
strand=-1
target 5' GCUGUCAUGCAACCCCACAUCA 3'
. ::::::::::: :::::::::::
query 3' UUGCAGUACGUGGGGGUGUAGU 5'
query=novel_mir_89, target=R03G_16418, score=4, range=563-584,
strand=-1
target 5' GCUGUCAUGCAACCCCACAUCA 3'
. ::::::::::: :::::::::::
query 3' UUGCAGUACGUGGGGGUGUAGU 5'
query=novel_mir_89, target=R03G_07132, score=4, range=563-584,
strand=-1
target 5' GCUGUCAUGCAACCCCACAUCA 3'
. ::::::::::: :::::::::::
query 3' UUGCAGUACGUGGGGGUGUAGU 5'
query=novel_mir_89, target=R03G_12178, score=4, range=563-584,
strand=-1
target 5' GCUGUCAUGCAACCCCACAUCA 3'
. ::::::::::: :::::::::::
query 3' UUGCAGUACGUGGGGGUGUAGU 5'
query=novel_mir_89, target=R03G_10783, score=4, range=563-584,
strand=-1
target 5' GCUGUCAUGCAACCCCACAUCA 3'
. ::::::::::: :::::::::::
query 3' UUGCAGUACGUGGGGGUGUAGU 5'
query=novel_mir_35, target=R03G_01359, score=4, range=384-405,
strand=-1
target 5' UGAUUUAUUCAUJAGUUUUUCU 3'
::::: ::::::::::::::
query 3' UCUGAGUAAGUGAUCAAAAAGU 5'
query=novel_mir_35, target=R03G_03963, score=4, range=435-455,
strand=-1
target 5' UCAC-CAUUCACUGGUUUUUUCA 3'
```

```
:: ::::::::::::::::::::
query 3' UCUGAGUAAGUGAUCAAAAAGU 5'
query=novel_mir_50, target=R03G_10991, score=0, range=424-444,
strand=1
target 5' AAUGAUCUCCUACAUGGCAA 3'
::::::::::::::::::
query 3' UUACUAGAAGGAUGUACCGUU 5'
query=novel_mir_50, target=R03G_01944, score=0, range=424-444,
strand=1
target 5' AAUGAUCUCCUACAUGGCAA 3'
::::::::::::::::::
query 3' UUACUAGAAGGAUGUACCGUU 5'
query=novel_mir_50, target=R03G_03749, score=0, range=424-444,
strand=1
target 5' AAUGAUCUCCUACAUGGCAA 3'
::::::::::::::::::
query 3' UUACUAGAAGGAUGUACCGUU 5'
query=novel_mir_50, target=R03G_17287, score=0, range=424-444,
strand=1
target 5' AAUGAUCUCCUACAUGGCAA 3'
::::::::::::::::::
query 3' UUACUAGAAGGAUGUACCGUU 5'
query=novel_mir_50, target=R03G_15573, score=0, range=424-444,
strand=1
target 5' AAUGAUCUCCUACAUGGCAA 3'
::::::::::::::::::
query 3' UUACUAGAAGGAUGUACCGUU 5'
query=novel_mir_50, target=R03G_13849, score=0, range=424-444,
strand=1
target 5' AAUGAUCUCCUACAUGGCAA 3'
::::::::::::::::::
query 3' UUACUAGAAGGAUGUACCGUU 5'
query=novel_mir_50, target=R03G_06502, score=0, range=424-444,
strand=1
target 5' AAUGAUCUCCUACAUGGCAA 3'
::::::::::::::::::
query 3' UUACUAGAAGGAUGUACCGUU 5'
query=novel_mir_50, target=R03G_10420, score=0, range=424-444,
strand=1
target 5' AAUGAUCUCCUACAUGGCAA 3'
::::::::::::::::::
query 3' UUACUAGAAGGAUGUACCGUU 5'
query=novel_mir_50, target=R03G_01733, score=0, range=424-444,
strand=1
target 5' AAUGAUCUCCUACAUGGCAA 3'
```

query 3' UUACUAGAAGGAUGUACCGUU 5'  
query=novel\_mir\_50, target=R03G\_05865, score=0, range=424-444,  
strand=1  
target 5' AAUGAUCUCCUACAUGGCAA 3'

query 3' UUACUAGAAGGAUGUACCGUU 5'  
query=novel\_mir\_50, target=R03G\_17446, score=0, range=424-444,  
strand=1  
target 5' AAUGAUCUCCUACAUGGCAA 3'

query 3' UUACUAGAAGGAUGUACCGUU 5'  
query=novel\_mir\_50, target=R03G\_02708, score=0, range=157-177,  
strand=1  
target 5' AAUGAUCUCCUACAUGGCAA 3'

query 3' UUACUAGAAGGAUGUACCGUU 5'  
query=novel\_mir\_50, target=R03G\_04662, score=0, range=280-300,  
strand=1  
target 5' AAUGAUCUCCUACAUGGCAA 3'

query 3' UUACUAGAAGGAUGUACCGUU 5'  
query=novel\_mir\_50, target=R03G\_16376, score=0, range=349-369,  
strand=1  
target 5' AAUGAUCUCCUACAUGGCAA 3'

query 3' UUACUAGAAGGAUGUACCGUU 5'  
query=novel\_mir\_50, target=R03G\_10965, score=0, range=424-444,  
strand=1  
target 5' AAUGAUCUCCUACAUGGCAA 3'

query 3' UUACUAGAAGGAUGUACCGUU 5'  
query=novel\_mir\_50, target=R03G\_02147, score=3, range=114-133,  
strand=-1  
target 5' CAUGAUCUCCU-CAUGGCAA 3'

query 3' UUACUAGAAGGAUGUACCGUU 5'  
query=novel\_mir\_50, target=R03G\_01056, score=3.5, range=424-444,  
strand=1  
target 5' AAUGGCCUCCUACUUGGCAA 3'

query 3' UUACUAGAAGGAUGUACCGUU 5'  
query=novel\_mir\_50, target=R03G\_14069, score=4, range=142-161,  
strand=1  
target 5' GAUGG-CUUUUUACAUGGCAA 3'



.::::. :::::::::::::::  
query 3' UUACUAGAAGGAUGUACCGUU 5'  
query=novel\_mir\_50, target=R03G\_03067, score=4, range=832-851,  
strand=1  
target 5' AGUGGUCUCCUG-AUGGCAA 3'  
:.....: :::::::  
query 3' UUACUAGAAGGAUGUACCGUU 5'  
query=novel\_mir\_50, target=R03G\_04415, score=4, range=57-76, stra  
target 5' AAUGUUCUU-CUACAUGCGA 3'  
:::: ::::: ::::::::::::  
query 3' UUACUAGAAGGAUGUACCGUU 5'  
query=novel\_mir\_57, target=R03G\_10513, score=1, range=144-165,  
strand=-1  
target 5' AUAGCUGAUGACAAAUAGAUA 3'  
:.....: :::::::  
query 3' GAUCGACUACUGUUUAUCUAUU 5'  
query=novel\_mir\_57, target=R03G\_08576, score=3.5, range=208-228,  
strand=-1  
target 5' CU-GUUGUUGAUAAAUAUA 3'  
:: :...: :.....: :::::::  
query 3' GAUCGACUACUGUUUAUCUAUU 5'  
query=novel\_mir\_59, target=R03G\_11601, score=0, range=66-85, stra  
target 5' UGAGAUUGAUUUAGGAACGA 3'  
:.....: :::::::  
query 3' ACUCUAACUAAAUCUUGCU 5'  
query=novel\_mir\_59, target=R03G\_11919, score=2, range=198-217,  
strand=1  
target 5' UGAGAUUGAUUUAGGAACGA 3'  
:.....: ::::::  
query 3' ACUCUAACUAAAUCUUGCU 5'  
query=novel\_mir\_59, target=R03G\_06944, score=2, range=128-147,  
strand=-1  
target 5' CAAGAUUGAUUUAGGAACGA 3'  
:.....: :::::::  
query 3' ACUCUAACUAAAUCUUGCU 5'  
query=novel\_mir\_59, target=R03G\_01436, score=3.5, range=268-286,  
strand=1  
target 5' UGGGA-UGAUUUAGGUACGA 3'  
:....: :.....: ::::::  
query 3' ACUCUAACUAAAUCUUGCU 5'  
query=novel\_mir\_59, target=R03G\_06803, score=3.5, range=14-33,  
strand=-1  
target 5' UGAGGUUGAUUUAGAAUGA 3'  
:.....: ::::::  
query 3' ACUCUAACUAAAUCUUGCU 5'

query=novel\_mir\_59, target=R03G\_12332, score=3.5, range=737-756,  
strand=-1  
target 5' UGAGGCUGAUUUAGGAUCGA 3'  
::::. ::::::::::: :::  
query 3' ACUCUAACUAAAUCCUUGCU 5'

query=novel\_mir\_59, target=R03G\_00131, score=4, range=435-454,  
strand=1  
target 5' UGAGAUUGUUCUAGGAACGA 3'  
:::::::::: : :::::::::::  
query 3' ACUCUAACUAAAUCCUUGCU 5'

query=novel\_mir\_59, target=R03G\_12164, score=4, range=255-274,  
strand=1  
target 5' UGAGAUUGUAAUUAGGAACGA 3'  
:::::::::: : :::::::::::  
query 3' ACUCUAACUAAAUCCUUGCU 5'

query=novel\_mir\_59, target=R03G\_03159, score=4, range=573-592,  
strand=1  
target 5' UGAGAUUGUUCUAGGAACGA 3'  
:::::::::: : :::::::::::  
query 3' ACUCUAACUAAAUCCUUGCU 5'

query=novel\_mir\_59, target=R03G\_06300, score=4, range=153-172,  
strand=1  
target 5' UGAGAUCGAUUUAGAAAUGA 3'  
:::::: : :::::::::: : :::::  
query 3' ACUCUAACUAAAUCCUUGCU 5'

query=novel\_mir\_59, target=R03G\_00924, score=4, range=675-694,  
strand=-1  
target 5' UGAGAUUGAUUUUGGGAAAGU 3'  
::::::::::: ::::::::::: :  
query 3' ACUCUAACUAAAUCCUUGCU 5'

query=novel\_mir\_59, target=R03G\_12154, score=4, range=767-786,  
strand=-1  
target 5' GGUGAUAGAUUUAGGAAUGA 3'  
: ::: :::::::::::::::  
query 3' ACUCUAACUAAAUCCUUGCU 5'

query=novel\_mir\_59, target=R03G\_12214, score=4, range=1008-1026,  
strand=-1  
target 5' UGAGAUGGAUUUAGGAG-GA 3'  
:::::: : ::::::::::. ::  
query 3' ACUCUAACUAAAUCCUUGCU 5'

query=novel\_mir\_76, target=R03G\_09241, score=0, range=998-1017,  
strand=1  
target 5' AACUGAAUCCAAUUGAGCAA 3'  
::::::::::: :::::::::::  
query 3' UUGACUUAGGUUAAACUCGUU 5'

query=novel\_mir\_76, target=R03G\_15904, score=0, range=1034-1053,  
strand=1  
target 5' AACUGAAUCCAAUUGAGCAA 3'  
:~::~  
query 3' UUGACUUAGGUU AACUCGUU 5'  
query=novel\_mir\_76, target=R03G\_16780, score=0, range=1100-1119,  
strand=1  
target 5' AACUGAAUCCAAUUGAGCAA 3'  
:~::~  
query 3' UUGACUUAGGUU AACUCGUU 5'  
query=novel\_mir\_76, target=R03G\_16853, score=0, range=1100-1119,  
strand=1  
target 5' AACUGAAUCCAAUUGAGCAA 3'  
:~::~  
query 3' UUGACUUAGGUU AACUCGUU 5'  
query=novel\_mir\_76, target=R03G\_16782, score=0, range=1100-1119,  
strand=1  
target 5' AACUGAAUCCAAUUGAGCAA 3'  
:~::~  
query 3' UUGACUUAGGUU AACUCGUU 5'  
query=novel\_mir\_76, target=R03G\_16855, score=0, range=1100-1119,  
strand=1  
target 5' AACUGAAUCCAAUUGAGCAA 3'  
:~::~  
query 3' UUGACUUAGGUU AACUCGUU 5'  
query=novel\_mir\_76, target=R03G\_12229, score=0.5, range=1097-1116  
strand=1  
target 5' AACUGAAUCCAAUUGAGCAG 3'  
:~::~  
query 3' UUGACUUAGGUU AACUCGUU 5'  
query=novel\_mir\_76, target=R03G\_12986, score=0.5, range=1097-1116  
strand=1  
target 5' AACUGAAUCCAAUUGAGCAG 3'  
:~::~  
query 3' UUGACUUAGGUU AACUCGUU 5'  
query=novel\_mir\_76, target=R03G\_12985, score=0.5, range=1097-1116  
strand=1  
target 5' AACUGAAUCCAAUUGAGCAG 3'  
:~::~  
query 3' UUGACUUAGGUU AACUCGUU 5'  
query=novel\_mir\_76, target=R03G\_12228, score=0.5, range=1097-1116  
strand=1  
target 5' AACUGAAUCCAAUUGAGCAG 3'  
:~::~  
query 3' UUGACUUAGGUU AACUCGUU 5'

query=novel\_mir\_76, target=R03G\_07244, score=1, range=1124-1143,  
strand=1  
target 5' AGCUGAAUCCAAUUGAGCAG 3'  
:.....  
query 3' UUGACUUAGGUU AACUCGUU 5'  
query=novel\_mir\_76, target=R03G\_06815, score=1, range=1031-1050,  
strand=1  
target 5' AGCUGAAUCCAAUUGAGCAG 3'  
:.....  
query 3' UUGACUUAGGUU AACUCGUU 5'  
query=novel\_mir\_76, target=R03G\_06813, score=1, range=134-153,  
strand=1  
target 5' AGCUGAAUCCAAUUGAGCAG 3'  
:.....  
query 3' UUGACUUAGGUU AACUCGUU 5'  
query=novel\_mir\_76, target=R03G\_07241, score=1, range=1031-1050,  
strand=1  
target 5' AGCUGAAUCCAAUUGAGCAG 3'  
:.....  
query 3' UUGACUUAGGUU AACUCGUU 5'  
query=novel\_mir\_76, target=R03G\_08570, score=1, range=134-153,  
strand=1  
target 5' AACUAAUCCAAUUGAGCAA 3'  
:::: :.....  
query 3' UUGACUUAGGUU AACUCGUU 5'  
query=novel\_mir\_76, target=R03G\_14342, score=1, range=755-774,  
strand=1  
target 5' AACUCAUCCAAUUGAGCAA 3'  
:::: :.....  
query 3' UUGACUUAGGUU AACUCGUU 5'  
query=novel\_mir\_76, target=R03G\_16382, score=1.5, range=1175-1194  
strand=1  
target 5' AGCUAAUCCAAUUGAGCAA 3'  
:..: :.....  
query 3' UUGACUUAGGUU AACUCGUU 5'  
query=novel\_mir\_76, target=R03G\_02667, score=1.5, range=365-384,  
strand=1  
target 5' AACUAAAUCCAAUUGAGCAG 3'  
:::: :.....  
query 3' UUGACUUAGGUU AACUCGUU 5'  
query=novel\_mir\_76, target=R03G\_07205, score=1.5, range=767-786,  
strand=1  
target 5' AACUCAUCCAAUUGAGCAG 3'  
:::: :.....  
query 3' UUGACUUAGGUU AACUCGUU 5'

query=novel\_mir\_76, target=R03G\_03724, score=1.5, range=824-843,  
strand=1  
target 5' AGCUCAAUCCAAUUGAGCAA 3'  
:..: :.....:  
query 3' UUGACUUAGGUUAAACUCGUU 5'  
query=novel\_mir\_76, target=R03G\_12457, score=1.5, range=1043-1062  
strand=1  
target 5' AGCUCAAUCCAAUUGAGCAA 3'  
:..: :.....:  
query 3' UUGACUUAGGUUAAACUCGUU 5'  
query=novel\_mir\_76, target=R03G\_09816, score=2, range=842-861,  
strand=1  
target 5' AGCUCAAUCCAAUUGAGCAG 3'  
:..: :.....:  
query 3' UUGACUUAGGUUAAACUCGUU 5'  
query=novel\_mir\_76, target=R03G\_12703, score=2, range=977-996,  
strand=-1  
target 5' AGUUGGAUCCAAUUGAGCAG 3'  
:.....:  
query 3' UUGACUUAGGUUAAACUCGUU 5'  
query=novel\_mir\_76, target=R03G\_03041, score=2.5, range=1342-1362  
strand=1  
target 5' GGCUGUAGUCCAAUUGAGCAA 3'  
:.....:  
query 3' UUGAC-UUAGGUUAAACUCGUU 5'  
query=novel\_mir\_76, target=R03G\_11832, score=2.5, range=230-248,  
strand=-1  
target 5' AGC-GAAUCUAAUUGAGCAA 3'  
:..: :.....:  
query 3' UUGACUUAGGUUAAACUCGUU 5'  
query=novel\_mir\_76, target=R03G\_06971, score=3, range=755-774,  
strand=1  
target 5' AGCUGAAUCUGAUUGAGCAG 3'  
:.....:  
query 3' UUGACUUAGGUUAAACUCGUU 5'  
query=novel\_mir\_76, target=R03G\_00694, score=3, range=1154-1173,  
strand=1  
target 5' AAUUGAAUCCUAAUUGAGCAG 3'  
:.....:  
query 3' UUGACUUAGGUUAAACUCGUU 5'  
query=novel\_mir\_76, target=R03G\_15167, score=3, range=1154-1173,  
strand=1  
target 5' AAUUGAAUCCUAAUUGAGCAG 3'  
:.....:  
query 3' UUGACUUAGGUUAAACUCGUU 5'





strand=-1  
target 5' AACUGCAUCCACUUGAGCAG 3'  
::::: ::::: ::::: :::::  
query 3' UUGACUUAGGUU AACUCGUU 5'  
query=novel\_mir\_76, target=R03G\_01345, score=3.5, range=707-726,  
strand=-1  
target 5' AGCGGCAUUCAAUUGAGCAA 3'  
.: : ::::: ::::: :::::  
query 3' UUGACUUAGGUU AACUCGUU 5'  
query=novel\_mir\_76, target=R03G\_10919, score=3.5, range=218-238,  
strand=-1  
target 5' AGCUAUAUCUAAUUGAGCAA 3'  
.: : ::::: ::::: :::::  
query 3' UUGA-CUUAGGUU AACUCGUU 5'  
query=novel\_mir\_76, target=R03G\_04587, score=4, range=221-240,  
strand=1  
target 5' AACUGAACCCAAUUGAACAA 3'  
::::: ::::: ::::: :::::  
query 3' UUGACUUAGGUU AACUCGUU 5'  
query=novel\_mir\_76, target=R03G\_06714, score=4, range=2930-2949,  
strand=1  
target 5' AUCUGAAAUCAAUUGAGCAA 3'  
: ::::: .: ::::: :::::  
query 3' UUGACUUAGGUU AACUCGUU 5'  
query=novel\_mir\_76, target=R03G\_08009, score=4, range=48-67, stra  
target 5' AUCUGAAUCCAAUUGGGCUA 3'  
: ::::: ::::: ::::: :::::  
query 3' UUGACUUAGGUU AACUCGUU 5'  
query=novel\_mir\_76, target=R03G\_00172, score=4, range=1017-1036,  
strand=1  
target 5' AACAGAAUCGAAUUGGGCAA 3'  
.: : ::::: ::::: :::::  
query 3' UUGACUUAGGUU AACUCGUU 5'  
query=novel\_mir\_76, target=R03G\_00455, score=4, range=160-179,  
strand=1  
target 5' AACUCAACCCAAUUGAGUAA 3'  
::::: ::::: ::::: :::::  
query 3' UUGACUUAGGUU AACUCGUU 5'  
query=novel\_mir\_76, target=R03G\_06729, score=4, range=727-746,  
strand=1  
target 5' AACUUGGUGCAAUUGAGCAA 3'  
::::: .: : ::::: ::::: :::::  
query 3' UUGACUUAGGUU AACUCGUU 5'  
query=novel\_mir\_76, target=R03G\_15892, score=4, range=727-746,  
strand=1



target 5' AACUUGGUGCAAUUGAGCAA 3'  
:::: ... ::::::::::::::  
query 3' UUGACUUAGGUU AACUCGUU 5'  
query=novel\_mir\_76, target=R03G\_16125, score=4, range=727-746,  
strand=1  
target 5' AACUUGGUGCAAUUGAGCAA 3'  
:::: ... ::::::::::::::  
query 3' UUGACUUAGGUU AACUCGUU 5'  
query=novel\_mir\_76, target=R03G\_07695, score=4, range=727-746,  
strand=1  
target 5' AACUUGGUGCAAUUGAGCAA 3'  
:::: ... ::::::::::::::  
query 3' UUGACUUAGGUU AACUCGUU 5'  
query=novel\_mir\_76, target=R03G\_16275, score=4, range=257-276,  
strand=1  
target 5' AGUUAAAUCCUAUUGAGCAA 3'  
...: ::::::: ::::::::::::::  
query 3' UUGACUUAGGUU AACUCGUU 5'  
query=novel\_mir\_76, target=R03G\_04060, score=4, range=368-387,  
strand=1  
target 5' AGCUCAAUCCUAUUGAGCAG 3'  
...: ::::::: ::::::::::::::  
query 3' UUGACUUAGGUU AACUCGUU 5'  
query=novel\_mir\_76, target=R03G\_13060, score=4, range=446-465,  
strand=1  
target 5' AGCUAAAUCCUAUUGAGCAG 3'  
...: ::::::: ::::::::::::::  
query 3' UUGACUUAGGUU AACUCGUU 5'  
query=novel\_mir\_76, target=R03G\_09156, score=4, range=143-162,  
strand=1  
target 5' AGCUAAAUCCUAUUGAGCAG 3'  
...: ::::::: ::::::::::::::  
query 3' UUGACUUAGGUU AACUCGUU 5'  
query=novel\_mir\_76, target=R03G\_09158, score=4, range=143-162,  
strand=1  
target 5' AGCUAAAUCCUAUUGAGCAG 3'  
...: ::::::: ::::::::::::::  
query 3' UUGACUUAGGUU AACUCGUU 5'  
query=novel\_mir\_76, target=R03G\_00146, score=4, range=308-327,  
strand=1  
target 5' AGCUAAAUCCUAUUGAGCAG 3'  
...: ::::::: ::::::::::::::  
query 3' UUGACUUAGGUU AACUCGUU 5'  
query=novel\_mir\_76, target=R03G\_04864, score=4, range=1682-1701,  
strand=1

target 5' AAAAGAAUUCGAUUGAGCAA 3'  
:: .....  
query 3' UUGACUUAGGUU AACUCGUU 5'  
query=novel\_mir\_76, target=R03G\_09762, score=4, range=95-114, str  
target 5' AGCUCAAUCCAAUUGAACAG 3'  
::: ..... ::.  
query 3' UUGACUUAGGUU AACUCGUU 5'  
query=novel\_mir\_76, target=R03G\_11267, score=4, range=815-834,  
strand=1  
target 5' ACCUGAACCCAAUUGAGCAC 3'  
: .....  
query 3' UUGACUUAGGUU AACUCGUU 5'  
query=novel\_mir\_76, target=R03G\_10549, score=4, range=815-834,  
strand=1  
target 5' ACCUGAACCCAAUUGAGCAC 3'  
: .....  
query 3' UUGACUUAGGUU AACUCGUU 5'  
query=novel\_mir\_76, target=R03G\_08653, score=4, range=815-834,  
strand=1  
target 5' AUCUGAACCCAAUUGAGCAC 3'  
: .....  
query 3' UUGACUUAGGUU AACUCGUU 5'  
query=novel\_mir\_76, target=R03G\_05904, score=4, range=815-834,  
strand=1  
target 5' ACCUGAACCCAAUUGAGCAC 3'  
: .....  
query 3' UUGACUUAGGUU AACUCGUU 5'  
query=novel\_mir\_76, target=R03G\_12177, score=4, range=815-834,  
strand=1  
target 5' ACCUGAACCCAAUUGAGCAC 3'  
: .....  
query 3' UUGACUUAGGUU AACUCGUU 5'  
query=novel\_mir\_76, target=R03G\_01305, score=4, range=815-834,  
strand=1  
target 5' ACCUGAACCCAAUUGAGCAC 3'  
: .....  
query 3' UUGACUUAGGUU AACUCGUU 5'  
query=novel\_mir\_76, target=R03G\_07995, score=4, range=722-741,  
strand=1  
target 5' ACCUGAACCCAAUUGAGCAC 3'  
: .....  
query 3' UUGACUUAGGUU AACUCGUU 5'  
query=novel\_mir\_76, target=R03G\_01699, score=4, range=191-210,  
strand=1  
target 5' ACCUGAACCCAAUUGAGCAC 3'



```

:: :: ::::::::::::::
query 3' UUGACUUAGGUU AACUCGUU 5'
query=novel_mir_76, target=R03G_16171, score=4, range=2891-2910,
strand=-1
target 5' GGGAGAAUCCAGUUGAGCAA 3'
.. ::::::::::::::
query 3' UUGACUUAGGUU AACUCGUU 5'
query=novel_mir_76, target=R03G_03935, score=4, range=13-32, stra
target 5' ACCUGAACCCAAUUGAGCAC 3'
: ::::: ::::::::::::::
query 3' UUGACUUAGGUU AACUCGUU 5'
query=novel_mir_76, target=R03G_09829, score=4, range=374-393,
strand=-1
target 5' AUCUUUAUCUAAUUGAGCAA 3'
: :: ::::::::::::::
query 3' UUGACUUAGGUU AACUCGUU 5'
query=novel_mir_76, target=R03G_12494, score=4, range=560-580,
strand=-1
target 5' AUCUAAUAUCCAAUUGAGCAC 3'
: :: : ::::::::::::::
query 3' UUGACU-UAGGUU AACUCGUU 5'
CDC-8219 Novel miRNA Targets (PR)
#miRNA Score mRNA Pairing target and miRNA
>novel_mir_128 Score: 0.0 R03G_17255
Query: 1 TGAGCACCGCACACTTCAGAGG 22
|||||
Sbjct: 1843 ACTCGTGGCGTGTGAAGTCTCC 1822
>novel_mir_128 Score: 0.0 R03G_17156
Query: 1 TGAGCACCGCACACTTCAGAGG 22
|||||
Sbjct: 145 ACTCGTGGCGTGTGAAGTCTCC 124
>novel_mir_128 Score: 0.0 R03G_13448
Query: 1 TGAGCACCGCACACTTCAGAGG 22
|||||
Sbjct: 1858 ACTCGTGGCGTGTGAAGTCTCC 1837
>novel_mir_128 Score: 0.0 R03G_11979
Query: 1 TGAGCACCGCACACTTCAGAGG 22
|||||
Sbjct: 1846 ACTCGTGGCGTGTGAAGTCTCC 1825
>novel_mir_128 Score: 1.0 R03G_10543
Query: 1 TGAGCACCGCACACTTCAGAGG 22
|||||*|||||
Sbjct: 1345 ACTCGTGGCGTGTGAAATCTCC 1324
>novel_mir_128 Score: 1.0 R03G_07735
Query: 1 TGAGCACCGCACACTTCAGAGG 22

```

|||||\*|||||  
Sbjct: 1792 ACTCGTGGCGTGTGAAATCTCC 1771  
>novel\_mir\_128 Score: 0.0 R03G\_01294  
Query: 1 TGAGCACCGCACACTTCAGAGG 22  
|||||  
Sbjct: 961 ACTCGTGGCGTGTGAAGTCTCC 940  
>novel\_mir\_33 Score: 2.5 R03G\_11197  
Query: 1 GGAGGGATGGCCGAGTTGG-T 20  
|||:|||||\*:||\*|  
Sbjct: 420 CCTCTCTACCGGCTCCGCCTA 400  
>novel\_mir\_79 Score: 0.0 R03G\_16804  
Query: 1 TGACAATATGGGAGAACTGGCT 22  
|||||  
Sbjct: 357 ACTGTTATACCCTCTTGACCGA 336  
>novel\_mir\_79 Score: 1.5 R03G\_15002  
Query: 1 TGACAATATGGGAGAACTGGCT 22  
||\*|||||\*|  
Sbjct: 357 ACCGTTATACCCTCTTGACCTA 336  
>novel\_mir\_79 Score: 0.0 R03G\_15131  
Query: 1 TGACAATATGGGAGAACTGGCT 22  
|||||  
Sbjct: 357 ACTGTTATACCCTCTTGACCGA 336  
>novel\_mir\_79 Score: 0.0 R03G\_13439  
Query: 1 TGACAATATGGGAGAACTGGCT 22  
|||||  
Sbjct: 357 ACTGTTATACCCTCTTGACCGA 336  
>novel\_mir\_79 Score: 0.0 R03G\_13293  
Query: 1 TGACAATATGGGAGAACTGGCT 22  
|||||  
Sbjct: 357 ACTGTTATACCCTCTTGACCGA 336  
>novel\_mir\_79 Score: 0.0 R03G\_12007  
Query: 1 TGACAATATGGGAGAACTGGCT 22  
|||||  
Sbjct: 357 ACTGTTATACCCTCTTGACCGA 336  
>novel\_mir\_79 Score: 1.5 R03G\_12536  
Query: 1 TGACAATATGGGAGAACTGGCT 22  
||\*|||||\*|  
Sbjct: 357 ACCGTTATACCCTCTTGACCTA 336  
>novel\_mir\_79 Score: 0.0 R03G\_10715  
Query: 1 TGACAATATGGGAGAACTGGCT 22  
|||||  
Sbjct: 357 ACTGTTATACCCTCTTGACCGA 336  
>novel\_mir\_79 Score: 0.0 R03G\_09718  
Query: 1 TGACAATATGGGAGAACTGGCT 22  
|||||

Sbjct: 357 ACTGTTATACCCTCTTGACCGA 336  
>novel\_mir\_79 Score: 0.0 R03G\_10177  
Query: 1 TGACAATATGGGAGAACTGGCT 22  
|||||

Sbjct: 357 ACTGTTATACCCTCTTGACCGA 336  
>novel\_mir\_79 Score: 0.0 R03G\_09044  
Query: 1 TGACAATATGGGAGAACTGGCT 22  
|||||

Sbjct: 219 ACTGTTATACCCTCTTGACCGA 198  
>novel\_mir\_79 Score: 1.0 R03G\_04309  
Query: 1 TGACAATATGGGAGAACTGGCT 22  
|||||:|||||\*|

Sbjct: 357 ACTGTTATGCCCTCTTGACCTA 336  
>novel\_mir\_79 Score: 0.0 R03G\_03867  
Query: 1 TGACAATATGGGAGAACTGGCT 22  
|||||

Sbjct: 357 ACTGTTATACCCTCTTGACCGA 336  
>novel\_mir\_79 Score: 0.0 R03G\_01004  
Query: 1 TGACAATATGGGAGAACTGGCT 22  
|||||

Sbjct: 357 ACTGTTATACCCTCTTGACCGA 336  
>novel\_mir\_79 Score: 0.0 R03G\_01475  
Query: 1 TGACAATATGGGAGAACTGGCT 22  
|||||

Sbjct: 357 ACTGTTATACCCTCTTGACCGA 336  
>novel\_mir\_101 Score: 2.5 R03G\_13432  
Query: 1 TACCACAATGTCGAGACCATAAG 23  
\*|||||\*|

Sbjct: 268 TTGGTGTTACCCCTCTGGTATTC 246  
>novel\_mir\_101 Score: 0.0 R03G\_13001  
Query: 1 TACCACAATGTCGAGACCATAAG 23  
|||||

Sbjct: 1156 ATGGTGTTACAGCTCTGGTATTC 1134  
>novel\_mir\_101 Score: 1.5 R03G\_09843  
Query: 1 TACCACAATGTCGAGACCA-TAAG 23  
:|||||\*:||\*

Sbjct: 391 GTGGTGTTACAGCTCTGGTCGTTA 368  
>novel\_mir\_101 Score: 0.0 R03G\_06596  
Query: 1 TACCACAATGTCGAGACCATAAG 23  
|||||

Sbjct: 1156 ATGGTGTTACAGCTCTGGTATTC 1134  
>novel\_mir\_101 Score: 0.0 R03G\_03002  
Query: 1 TACCACAATGTCGAGACCATAAG 23  
|||||

Sbjct: 1156 ATGGTGTTACAGCTCTGGTATTC 1134

>novel\_mir\_22 Score: 0.0 R03G\_02842  
Query: 1 TAGCGCCTATTTTCTTTCCTCA 22  
|||||  
Sbjct: 23 ATCGCGGATAAAAAGAAAGGAGT 2

>novel\_mir\_22 Score: 0.0 R03G\_04116  
Query: 1 TAGCGCCTATTTTCTTTCCTCA 22  
|||||  
Sbjct: 173 ATCGCGGATAAAAAGAAAGGAGT 152

>novel\_mir\_53 Score: 0.5 R03G\_13496  
Query: 1 TGCATCGGCTACGTTCTTTTCG 22  
|||||\*|  
Sbjct: 187 ACGTAGCCGATGCAAGAAAAAC 166

>novel\_mir\_53 Score: 1.8 R03G\_12846  
Query: 1 TGCATCGGCTACGTTCTTTTCG 22  
|||||:|\*|  
Sbjct: 495 ACGTAGCCGATGTTAGAAAAGT 474

>novel\_mir\_53 Score: 1.5 R03G\_08099  
Query: 1 TGCATCGGCTACGTTCTTTTCG 22  
|||:|\*|\*|  
Sbjct: 1038 ACGTGGCCGATGCAAGAACAAC 1017

>novel\_mir\_53 Score: 0.5 R03G\_01535  
Query: 1 TGCATCGGCTACGTTCTTTTCG 22  
\*|||  
Sbjct: 240 CCGTAGCCGATGCAAGAAAAGC 219

>novel\_mir\_53 Score: 0.5 R03G\_01538  
Query: 1 TGCATCGGCTACGTTCTTTTCG 22  
\*|||  
Sbjct: 240 CCGTAGCCGATGCAAGAAAAGC 219

>novel\_mir\_31 Score: 0.0 R03G\_15584  
Query: 1 TGTTCTGGGTTTCATGCATAAAG 22  
|||||  
Sbjct: 599 ACAAGACCCAAGTACGTATTTC 578

>novel\_mir\_31 Score: 1.0 R03G\_12163  
Query: 1 TGTTCTGGGTTTCATGCATAAAG 22  
|||||\*|\*|  
Sbjct: 494 ACAAGACCCAAGTACGTTTCTC 473

>novel\_mir\_31 Score: 0.0 R03G\_11241  
Query: 1 TGTTCTGGGTTTCATGCATAAAG 22  
|||||  
Sbjct: 599 ACAAGACCCAAGTACGTATTTC 578

>novel\_mir\_31 Score: 0.0 R03G\_10863  
Query: 1 TGTTCTGGGTTTCATGCATAAAG 22  
|||||  
Sbjct: 599 ACAAGACCCAAGTACGTATTTC 578

>novel\_mir\_31 Score: 0.0 R03G\_09201

Query: 1 TGTTCTGGGTTTCATGCATAAAG 22  
|||||  
Sbjct: 599 ACAAGACCCAAGTACGTATTTTC 578  
>novel\_mir\_31 Score: 1.8 R03G\_07972  
Query: 1 TGTTCTGGGTTTCATGCATAAAG 22  
|||||:||||:|:|\*|  
Sbjct: 605 ACAAGACCTAAGTATGTGTTAC 584  
>novel\_mir\_31 Score: 2.2 R03G\_04799  
Query: 1 TGTTCTGGGTTTCATGCATAAAG 22  
|||||\*|||||\*|||||:  
Sbjct: 827 ACAAGAACCAAGTACATATTTT 806  
>novel\_mir\_31 Score: 0.0 R03G\_05269  
Query: 1 TGTTCTGGGTTTCATGCATAAAG 22  
|||||  
Sbjct: 599 ACAAGACCCAAGTACGTATTTTC 578  
>novel\_mir\_31 Score: 0.0 R03G\_17455  
Query: 1 TGTTCTGGGTTTCATGCATAAAG 22  
|||||  
Sbjct: 599 ACAAGACCCAAGTACGTATTTTC 578  
>novel\_mir\_119 Score: 2.0 R03G\_08537  
Query: 1 GGTCTTGTGGTGTAAATGGTAAA 23  
|||||:|:||||:||||\*|  
Sbjct: 406 CCAGAACACTATATTATCAATGT 384  
>novel\_mir\_37 Score: 2.0 R03G\_13485  
Query: 1 TGGGAACTCGGGCTTTGGTAGG 22  
:|||||\*|||||:||||:  
Sbjct: 526 GCCCTTGTGCCCGAAATCATCT 505  
>novel\_mir\_37 Score: 1.0 R03G\_11834  
Query: 1 TGGGAACTCGGGCTTTGGTAGG 22  
|\*|||||  
Sbjct: 493 AACCTTGAGCCCGAAACCATCC 472  
>novel\_mir\_37 Score: 0.0 R03G\_08300  
Query: 1 TGGGAACTCGGGCTTTGGTAGG 22  
|||||  
Sbjct: 712 ACCCTTGAGCCCGAAACCATCC 691  
>novel\_mir\_37 Score: 0.0 R03G\_08905  
Query: 1 TGGGAACTCGGGCTTTGGTAGG 22  
|||||  
Sbjct: 712 ACCCTTGAGCCCGAAACCATCC 691  
>novel\_mir\_37 Score: 2.2 R03G\_05620  
Query: 1 TGGGAACTCGGGCTTTGGTAGG 22  
:|||||\*|||||:|||:  
Sbjct: 691 GCCCTTGTGCCCGAAATCATTT 670  
>novel\_mir\_37 Score: 0.0 R03G\_05951  
Query: 1 TGGGAACTCGGGCTTTGGTAGG 22



|||||  
Sbjct: 712 ACCCTTGAGCCCGAAACCATCC 691  
>novel\_mir\_37 Score: 0.0 R03G\_03720  
Query: 1 TGGGAACTCGGGCTTTGGTAGG 22  
|||||  
Sbjct: 712 ACCCTTGAGCCCGAAACCATCC 691  
>novel\_mir\_37 Score: 2.0 R03G\_04029  
Query: 1 TGGGAACTCGGGCTTTGGTAGG 22  
:|||||\*|||||:||||:  
Sbjct: 691 GCCCTTGTGCCCGAAATCATCT 670  
>novel\_mir\_37 Score: 0.0 R03G\_00795  
Query: 1 TGGGAACTCGGGCTTTGGTAGG 22  
|||||  
Sbjct: 712 ACCCTTGAGCCCGAAACCATCC 691  
>novel\_mir\_37 Score: 0.0 R03G\_01150  
Query: 1 TGGGAACTCGGGCTTTGGTAGG 22  
|||||  
Sbjct: 712 ACCCTTGAGCCCGAAACCATCC 691  
>novel\_mir\_37 Score: 0.0 R03G\_01159  
Query: 1 TGGGAACTCGGGCTTTGGTAGG 22  
|||||  
Sbjct: 712 ACCCTTGAGCCCGAAACCATCC 691  
>novel\_mir\_70 Score: 0.0 R03G\_16888  
Query: 1 TGGTGGGTTGAAAAGGCTTTGG 22  
|||||  
Sbjct: 1252 ACCACCCAACCTTTCCGAAACC 1231  
>novel\_mir\_70 Score: 0.0 R03G\_16319  
Query: 1 TGGTGGGTTGAAAAGGCTTTGG 22  
|||||  
Sbjct: 1933 ACCACCCAACCTTTCCGAAACC 1912  
>novel\_mir\_70 Score: 0.0 R03G\_12207  
Query: 1 TGGTGGGTTGAAAAGGCTTTGG 22  
|||||  
Sbjct: 1933 ACCACCCAACCTTTCCGAAACC 1912  
>novel\_mir\_70 Score: 0.0 R03G\_08064  
Query: 1 TGGTGGGTTGAAAAGGCTTTGG 22  
|||||  
Sbjct: 844 ACCACCCAACCTTTCCGAAACC 823  
>novel\_mir\_70 Score: 0.0 R03G\_07700  
Query: 1 TGGTGGGTTGAAAAGGCTTTGG 22  
|||||  
Sbjct: 1252 ACCACCCAACCTTTCCGAAACC 1231  
>novel\_mir\_70 Score: 0.0 R03G\_02944  
Query: 1 TGGTGGGTTGAAAAGGCTTTGG 22  
|||||

Sbjct: 1252 ACCACCCAACCTTTCCGAAACC 1231  
>novel\_mir\_70 Score: 0.0 R03G\_00653  
Query: 1 TGGTGGGTTGAAAAGGCTTTGG 22  
|||||

Sbjct: 1933 ACCACCCAACCTTTCCGAAACC 1912  
>novel\_mir\_70 Score: 0.0 R03G\_01241  
Query: 1 TGGTGGGTTGAAAAGGCTTTGG 22  
|||||

Sbjct: 508 ACCACCCAACCTTTCCGAAACC 487  
>novel\_mir\_70 Score: 0.0 R03G\_01244  
Query: 1 TGGTGGGTTGAAAAGGCTTTGG 22  
|||||

Sbjct: 115 ACCACCCAACCTTTCCGAAACC 94  
>novel\_mir\_70 Score: 0.0 R03G\_17284  
Query: 1 TGGTGGGTTGAAAAGGCTTTGG 22  
|||||

Sbjct: 112 ACCACCCAACCTTTCCGAAACC 91  
>novel\_mir\_41 Score: 2.5 R03G\_15235  
Query: 1 TACTTGATAATTGACTGATG-TT 22  
|||||\*|||||\*|\*\*|

Sbjct: 123 ATGAACTACTAACTGACGACTCA 101  
>novel\_mir\_41 Score: 1.0 R03G\_08791  
Query: 1 TACTTGATAATTGACTGATGTT 22  
|||||\*|:|

Sbjct: 78 ATGAACTATTAAGTACCATGA 57  
>novel\_mir\_41 Score: 2.5 R03G\_00481  
Query: 1 TACTTGATAATTGACTGATGTT 22  
\*|||||\*|:|:|

Sbjct: 653 CTGAACTATTAAGTACGCTGCGA 632  
>novel\_mir\_41 Score: 2.5 R03G\_01607  
Query: 1 TACTTGATAATTGACTGATGTT 22  
|||||:|:|\*:::

Sbjct: 525 ATGAACTGTTAGCTGAC-GTGG 505  
>novel\_mir\_116 Score: 2.5 R03G\_01815  
Query: 1 TTGTCCGACGGTCTCAGGTAATT 23  
:|||||\*|\*|

Sbjct: 372 GACAGGCTGCTAAAGTCCG-TAA 351  
>novel\_mir\_108 Score: 1.0 R03G\_09361  
Query: 1 TATTGCCCGGGTCAGATC-AA 20  
|||||\*|

Sbjct: 1195 ATAACGGGCCAGTCTAGCGT 1175  
>novel\_mir\_58 Score: 2.0 R03G\_10038  
Query: 1 TCTACTTTACAAGGTCTGGTGG 22  
||:||||\*|:|

Sbjct: 78 AGGTGAATTGTTCTAGACCACC 57

>novel\_mir\_58 Score: 1.5 R03G\_09176  
Query: 1 TCTACTTTACAAGGTCTGGTGG 22  
|||||||\*|||:|||||||  
Sbjct: 59 AGATGAAATATTCTAGACCACC 38

>novel\_mir\_58 Score: 0.0 R03G\_07315  
Query: 1 TCTACTTTACAAGGTCTGGTGG 22  
|||||||  
Sbjct: 59 AGATGAAATGTTCCAGACCACC 38

>novel\_mir\_58 Score: 2.5 R03G\_17467  
Query: 1 TCTACTTTACAAGGTCTGGTGG 22  
||\*|||||\*|||:|||||||  
Sbjct: 59 AGTTGAAATATTCTAGACCACC 38

>novel\_mir\_80 Score: 0.0 R03G\_16160  
Query: 1 TGTAGCTTTTCCTTTGCCTTTG 22  
|||||||  
Sbjct: 180 ACATCGAAAAGGAAACGGAAAC 159

>novel\_mir\_80 Score: 0.0 R03G\_14219  
Query: 1 TGTAGCTTTTCCTTTGCCTTTG 22  
|||||||  
Sbjct: 180 ACATCGAAAAGGAAACGGAAAC 159

>novel\_mir\_80 Score: 0.5 R03G\_13308  
Query: 1 TGTAGCTTTTCCTTTGCCTTTG 22  
|||||:|||||||  
Sbjct: 162 ACATCGGAAAGGAAACGGAAAC 141

>novel\_mir\_80 Score: 2.0 R03G\_13466  
Query: 1 TGTAGCTTTTCCTTTGCCTTTG 22  
\*|||||:|||||||\*|||  
Sbjct: 258 TCATCGGAAAGGAAACGATAAC 237

>novel\_mir\_80 Score: 1.5 R03G\_10242  
Query: 1 TGTAGCTTTTCCTTTGCCTTTG 22  
|:|||||||\*|||||||  
Sbjct: 180 ATATCGAAAATGAAACGGAAAC 159

>novel\_mir\_80 Score: 0.0 R03G\_10303  
Query: 1 TGTAGCTTTTCCTTTGCCTTTG 22  
|||||||  
Sbjct: 120 ACATCGAAAAGGAAACGGAAAC 99

>novel\_mir\_80 Score: 1.5 R03G\_10415  
Query: 1 TGTAGCTTTTCCTTTGCCTTTG 22  
|:|||||||\*|||||||  
Sbjct: 162 ATATCGAAAATGAAACGGAAAC 141

>novel\_mir\_80 Score: 1.0 R03G\_10665  
Query: 1 TGTAGCTTTTCCTTTGCCTTTG 22  
|||||||\*|||||  
Sbjct: 204 ACATCGAAAAGGAAACAGAAAC 183

>novel\_mir\_80 Score: 2.5 R03G\_09224

Query: 1 TGTAGCTTTTCCTTTGCCTTTG 22  
|||||:|||||||\*\*|||\*  
Sbjct: 135 ACATCGGAAAGGAAACAAAAA 114  
>novel\_mir\_80 Score: 2.5 R03G\_10093  
Query: 1 TGTAGCTTTTCCTTTGCCTTTG 22  
\*|||||||:|:|\*\*||  
Sbjct: 3777 CCATCGAAAAGGAAGTGG-CAC 3757  
>novel\_mir\_80 Score: 0.0 R03G\_08369  
Query: 1 TGTAGCTTTTCCTTTGCCTTTG 22  
|||||||  
Sbjct: 180 ACATCGAAAAGGAAACGGAAAC 159  
>novel\_mir\_80 Score: 2.0 R03G\_06787  
Query: 1 TGTAGCTTTTCCTTTGCCTTTG 22  
|||||:|||||||:|\*|||  
Sbjct: 180 ACATCGGAAAGGAAATAGAAAC 159  
>novel\_mir\_80 Score: 2.5 R03G\_07496  
Query: 1 TGTAGCTTTTCCTTTGCCTTTG 22  
\*|||||:|||||||:|\*|||  
Sbjct: 258 TCATCGGAAAGGAAATGACAAC 237  
>novel\_mir\_80 Score: 0.5 R03G\_03080  
Query: 1 TGTAGCTTTTCCTTTGCCTTTG 22  
|:|||||||  
Sbjct: 93 ATATCGAAAAGGAAACGGAAAC 72  
>novel\_mir\_80 Score: 1.5 R03G\_03876  
Query: 1 TGTAGCTTTTCCTTTGCCTTTG 22  
|:|||||||\*|||  
Sbjct: 180 ATATCGAAAAGGAAACAGAAAC 159  
>novel\_mir\_80 Score: 2.0 R03G\_00384  
Query: 1 TGTAGCTTTTCCTTTGCCTTTG 22  
|\*|||||||\*|||||||  
Sbjct: 63 AGATCGAAAAGAAAACGGAAAC 42  
>novel\_mir\_78 Score: 0.0 R03G\_12520  
Query: 1 TAGCGTAAAAGATCGAAAGA 20  
|||||||  
Sbjct: 2001 ATCGCATTTTCTAGCTTTCT 1982  
>novel\_mir\_78 Score: 1.0 R03G\_11933  
Query: 1 TAGCGTAAAAGATCGAAAGA 20  
|||||||\*|||||||  
Sbjct: 441 ATCGCATTTTATAGCTTTCT 422  
>novel\_mir\_78 Score: 0.0 R03G\_00797  
Query: 1 TAGCGTAAAAGATCGAAAGA 20  
|||||||  
Sbjct: 2001 ATCGCATTTTCTAGCTTTCT 1982  
>novel\_mir\_103 Score: 0.0 R03G\_13622  
Query: 1 TGTATCGAAGAGGAGGTCGG 20

```
|||||
Sbjct: 195 ACATAGCTTCTCCTCCAGCC 176
>novel_mir_103 Score: 2.2 R03G_10577
Query: 1 TGTATCGAAGAGGAGGTCCG 20
|:|||||*|||||*|:
Sbjct: 73 ATATAGCTTGTCTCCA-CT 55
>novel_mir_103 Score: 2.5 R03G_00604
Query: 1 TGTATCGAAGAGGAGGTCCG 20
*|||||*|||||*::
Sbjct: 52 TCATAGCTTATCCTCCA-TT 34
>novel_mir_103 Score: 0.0 R03G_01932
Query: 1 TGTATCGAAGAGGAGGTCCG 20
|||||
Sbjct: 105 ACATAGCTTCTCCTCCAGCC 86
>novel_mir_113 Score: 0.0 R03G_16699
Query: 1 TTAGGGTGGTGTATAAGTCAA 22
|||||
Sbjct: 298 AATCCCACCACAATATTCAGTT 277
>novel_mir_113 Score: 1.5 R03G_16426
Query: 1 TTAGGGTGGTGTATAAGTCAA 22
|||||:||||*|||||
Sbjct: 298 AATCCCATCACAACATTCAGTT 277
>novel_mir_113 Score: 0.0 R03G_14564
Query: 1 TTAGGGTGGTGTATAAGTCAA 22
|||||
Sbjct: 298 AATCCCACCACAATATTCAGTT 277
>novel_mir_113 Score: 0.0 R03G_13770
Query: 1 TTAGGGTGGTGTATAAGTCAA 22
|||||
Sbjct: 298 AATCCCACCACAATATTCAGTT 277
>novel_mir_113 Score: 0.0 R03G_12177
Query: 1 TTAGGGTGGTGTATAAGTCAA 22
|||||
Sbjct: 298 AATCCCACCACAATATTCAGTT 277
>novel_mir_113 Score: 0.0 R03G_11267
Query: 1 TTAGGGTGGTGTATAAGTCAA 22
|||||
Sbjct: 298 AATCCCACCACAATATTCAGTT 277
>novel_mir_113 Score: 0.2 R03G_11280
Query: 1 TTAGGGTGGTGTATAAGTCAA 22
:|||||
Sbjct: 298 GATCCCACCACAATATTCAGTT 277
>novel_mir_113 Score: 0.0 R03G_10549
Query: 1 TTAGGGTGGTGTATAAGTCAA 22
|||||
```

Sbjct: 298 AATCCCACCACAATATTCAGTT 277  
>novel\_mir\_113 Score: 0.0 R03G\_09959  
Query: 1 TTAGGGTGGTGTATAAGTCAA 22  
|||||

Sbjct: 298 AATCCCACCACAATATTCAGTT 277  
>novel\_mir\_113 Score: 0.0 R03G\_07995  
Query: 1 TTAGGGTGGTGTATAAGTCAA 22  
|||||

Sbjct: 298 AATCCCACCACAATATTCAGTT 277  
>novel\_mir\_113 Score: 0.0 R03G\_08653  
Query: 1 TTAGGGTGGTGTATAAGTCAA 22  
|||||

Sbjct: 298 AATCCCACCACAATATTCAGTT 277  
>novel\_mir\_113 Score: 0.0 R03G\_05638  
Query: 1 TTAGGGTGGTGTATAAGTCAA 22  
|||||

Sbjct: 298 AATCCCACCACAATATTCAGTT 277  
>novel\_mir\_113 Score: 0.0 R03G\_05904  
Query: 1 TTAGGGTGGTGTATAAGTCAA 22  
|||||

Sbjct: 298 AATCCCACCACAATATTCAGTT 277  
>novel\_mir\_113 Score: 0.0 R03G\_06413  
Query: 1 TTAGGGTGGTGTATAAGTCAA 22  
|||||

Sbjct: 91 AATCCCACCACAATATTCAGTT 70  
>novel\_mir\_113 Score: 1.5 R03G\_03936  
Query: 1 TTAGGGTGGTGTATAAGTCAA 22  
|||||:|||||\*|||||

Sbjct: 298 AATCCCATCACAAACATTCAGTT 277  
>novel\_mir\_113 Score: 0.0 R03G\_01305  
Query: 1 TTAGGGTGGTGTATAAGTCAA 22  
|||||

Sbjct: 298 AATCCCACCACAATATTCAGTT 277  
>novel\_mir\_113 Score: 0.0 R03G\_01700  
Query: 1 TTAGGGTGGTGTATAAGTCAA 22  
|||||

Sbjct: 352 AATCCCACCACAATATTCAGTT 331  
>novel\_mir\_127 Score: 2.5 R03G\_15195  
Query: 1 TGCTTGATAAGTAGTGACCACC 22  
|\*|||||\*|||||\*|||||

Sbjct: 2022 AAGAACTACTCATCACT-GTGG 2002  
>novel\_mir\_127 Score: 2.5 R03G\_14100  
Query: 1 TGCTTGATAAGTAGTGACCACC 22  
|||\*|||||:|\*|||||

Sbjct: 445 ACGCACTATTCATCGTTTGTGG 424



Query: 1 TAATGGCAGGGATGATAGAAG 21  
||||||\*|:|:||||\*||  
Sbjct: 34 ATTACCGACTCTGCTATCGTC 14  
>novel\_mir\_117 Score: 2.5 R03G\_11036  
Query: 1 TAATGGCAGGGATGATAGAAG 21  
||||:||||\*:||||||\*||  
Sbjct: 1039 ATTATCGTCATTACTATCGTC 1019  
>novel\_mir\_117 Score: 2.0 R03G\_04995  
Query: 1 TAATGGCAGGGATGATAGAAG 21  
|||||||\*||\*||\*  
Sbjct: 631 ATTACCGTCCCTCCTATATTA 611  
>novel\_mir\_117 Score: 2.5 R03G\_03964  
Query: 1 TAATGGCAGGGATGATAGAAG 21  
\*||||||\*|||||||\*\*  
Sbjct: 6604 TTTACCGACCCTACTATCTAA 6584  
>novel\_mir\_117 Score: 0.0 R03G\_00202  
Query: 1 TAATGGCAGGGATGATAGAAG 21  
|||||||\*||\*||\*  
Sbjct: 701 ATTACCGTCCCTACTATCTTC 681  
>novel\_mir\_117 Score: 2.2 R03G\_01175  
Query: 1 TAATGGCAGGGATGATAGAAG 21  
:|\*|||||:||||:||||  
Sbjct: 475 GTTTCCGTCCTTACTGTCTTC 455  
>novel\_mir\_117 Score: 2.5 R03G\_01267  
Query: 1 TAATGGCAGGGATGATAGAAG 21  
||||:||||:|:||||\*  
Sbjct: 190 ATTACTGTCTCTATTGTCTTG 170  
>novel\_mir\_43 Score: 2.5 R03G\_16061  
Query: 1 TCTTTTCGTTTCTATTTGCTTT 22  
||||||\*|:||||||\*|||  
Sbjct: 244 AGAAAAGAGAAGATAAA-AAAA 224  
>novel\_mir\_43 Score: 0.0 R03G\_15585  
Query: 1 TCTTTTCGTTTCTATTTGCTTT 22  
|||||||\*||\*||\*  
Sbjct: 1407 AGAAAAGCAAAGATAAACGAAA 1386  
>novel\_mir\_43 Score: 2.0 R03G\_15236  
Query: 1 TCTTTTCGTTTCTATTTGCTTT 22  
|\*||||:||||||\*|||  
Sbjct: 243 AAAAAAGTAAAGATAAAC-AAA 223  
>novel\_mir\_43 Score: 1.2 R03G\_15250  
Query: 1 TCTTTTCGTTTCTATTTGCTTT 22  
||||||\*|||||||:|  
Sbjct: 1407 AGAAAAGCTAAGATAAACGGAA 1386  
>novel\_mir\_43 Score: 2.2 R03G\_14388  
Query: 1 TCTTTTCGTTTCTATTTGCT-TT 22



|||||||:|||||\*|||||\*|  
Sbjct: 250 AGAAAAGTAAAGAAAAACGACGA 228  
>novel\_mir\_43 Score: 0.0 R03G\_13867  
Query: 1 TCTTTTCGTTTCTATTTGCTTT 22  
|||||||  
Sbjct: 1323 AGAAAAGCAAAGATAAACGAAA 1302  
>novel\_mir\_43 Score: 0.2 R03G\_13920  
Query: 1 TCTTTTCGTTTCTATTTGCTTT 22  
|||||||:|  
Sbjct: 1407 AGAAAAGCAAAGATAAACGGAA 1386  
>novel\_mir\_43 Score: 2.2 R03G\_14100  
Query: 1 TCTTTTCGTTTCTATTTGCTTT 22  
:|:|:|:|:|:|:|\*|  
Sbjct: 202 GGAGAAGTAAAGATAGAAGAAA 181  
>novel\_mir\_43 Score: 0.2 R03G\_11234  
Query: 1 TCTTTTCGTTTCTATTTGCTTT 22  
|||||||:|  
Sbjct: 1407 AGAAAAGCAAAGATAAACGGAA 1386  
>novel\_mir\_43 Score: 2.5 R03G\_10287  
Query: 1 TCTTTTCGTTTCTATTTGCTTT 22  
:|:|:|:|:|:|\*|:|  
Sbjct: 94 GGGAAAGCGGAGATAAAGGAAG 73  
>novel\_mir\_43 Score: 2.5 R03G\_11015  
Query: 1 TCTTTTCGTTTCTATTTGCTTT 22  
||||||\*||||\*|||\*|  
Sbjct: 801 AGAAAAGAAAAGAGAAACAAAA 780  
>novel\_mir\_43 Score: 0.2 R03G\_09965  
Query: 1 TCTTTTCGTTTCTATTTGCTTT 22  
|||||||:|  
Sbjct: 1407 AGAAAAGCAAAGATAAACGGAA 1386  
>novel\_mir\_43 Score: 0.2 R03G\_08608  
Query: 1 TCTTTTCGTTTCTATTTGCTTT 22  
|||||||:|  
Sbjct: 1923 AGAAAAGCAAAGATAAACGGAA 1902  
>novel\_mir\_43 Score: 0.2 R03G\_07036  
Query: 1 TCTTTTCGTTTCTATTTGCTTT 22  
|||||||:|  
Sbjct: 609 AGAAAAGCAAAGATAAACGGAA 588  
>novel\_mir\_43 Score: 2.5 R03G\_07659  
Query: 1 TCTTTTCGTTTCTATTTGCTTT 22  
||||||\*||\*|:|  
Sbjct: 169 AGAAAAGAAAAAATGAACGAAA 148  
>novel\_mir\_43 Score: 2.5 R03G\_07958  
Query: 1 TCTTTTCGTTTCTATTTGCTTT 22  
||||||:||\*||:|\*|

Sbjct: 1888 AGAAAAGTAAAAATAGAAGAAA 1867  
>novel\_mir\_43 Score: 0.2 R03G\_05617  
Query: 1 TCTTTTCGTTTCTATTTGCTTT 22  
|||||||:|

Sbjct: 1407 AGAAAAGCAAAGATAAACGGAA 1386  
>novel\_mir\_43 Score: 0.2 R03G\_06427  
Query: 1 TCTTTTCGTTTCTATTTGCTTT 22  
|||||||:|

Sbjct: 999 AGAAAAGCAAAGATAAACGGAA 978  
>novel\_mir\_43 Score: 0.2 R03G\_06428  
Query: 1 TCTTTTCGTTTCTATTTGCTTT 22  
|||||||:|

Sbjct: 501 AGAAAAGCAAAGATAAACGGAA 480  
>novel\_mir\_43 Score: 0.2 R03G\_06442  
Query: 1 TCTTTTCGTTTCTATTTGCTTT 22  
|||||||:|

Sbjct: 2064 AGAAAAGCAAAGATAAACGGAA 2043  
>novel\_mir\_43 Score: 0.2 R03G\_05272  
Query: 1 TCTTTTCGTTTCTATTTGCTTT 22  
|||||||:|

Sbjct: 1407 AGAAAAGCAAAGATAAACGGAA 1386  
>novel\_mir\_43 Score: 0.2 R03G\_02691  
Query: 1 TCTTTTCGTTTCTATTTGCTTT 22  
|||||||:|

Sbjct: 4896 AGAAAAGCAAAGATAAACGGAA 4875  
>novel\_mir\_43 Score: 0.2 R03G\_02959  
Query: 1 TCTTTTCGTTTCTATTTGCTTT 22  
|||||||:|

Sbjct: 1407 AGAAAAGCAAAGATAAACGGAA 1386  
>novel\_mir\_43 Score: 0.2 R03G\_03547  
Query: 1 TCTTTTCGTTTCTATTTGCTTT 22  
|||||||:|

Sbjct: 1407 AGAAAAGCAAAGATAAACGGAA 1386  
>novel\_mir\_43 Score: 0.2 R03G\_04114  
Query: 1 TCTTTTCGTTTCTATTTGCTTT 22  
|||||||:|

Sbjct: 1407 AGAAAAGCAAAGATAAACGGAA 1386  
>novel\_mir\_43 Score: 2.2 R03G\_00416  
Query: 1 TCTTTTCGTTTCTATTTG-CTTT 22  
\*|||||:|\*|||

Sbjct: 78 TGAAAAGTGAAGATAAACAGAGA 56  
>novel\_mir\_43 Score: 0.0 R03G\_01329  
Query: 1 TCTTTTCGTTTCTATTTGCTTT 22  
|||||||

Sbjct: 255 AGAAAAGCAAAGATAAACGAAA 234



Query: 1 TTGGTTGCTCTTTGTAAGTC 20  
|||||||\*:\*||\*:  
Sbjct: 1097 AACCAACGAGAAGTATT-GG 1079  
>novel\_mir\_42 Score: 2.2 R03G\_12001  
Query: 1 TTGGTTGCTCTTTGTAAGTC 20  
:||\*|||:|||||||\*|  
Sbjct: 679 GACCCACGGGAAACATTCTG 660  
>novel\_mir\_42 Score: 1.5 R03G\_11190  
Query: 1 TTGGTTGCTCTTTGTAAG-TC 20  
|||:|||||:|||||\*||  
Sbjct: 149 AACCGACGAGACATTCCAG 129  
>novel\_mir\_42 Score: 1.8 R03G\_11625  
Query: 1 TTGGTTGCTCTTTGTAAGTC 20  
||||:||||:|||||\*|  
Sbjct: 722 AACCGACGAGGAACATTTAT 703  
>novel\_mir\_42 Score: 2.2 R03G\_10556  
Query: 1 TTGGTTGCTCTTTGTAAGTC 20  
:||\*|||:|||||||\*|  
Sbjct: 679 GACCCACGGGAAACATTCTG 660  
>novel\_mir\_42 Score: 2.5 R03G\_09599  
Query: 1 TTGGTTGCTCTTTGTAAGTC 20  
||||:||||:|:||||\*|\*  
Sbjct: 209 AACCGACGAGGAGCATTGAC 190  
>novel\_mir\_42 Score: 0.5 R03G\_08820  
Query: 1 TTGGTTGCTCTTTGTAAGTC 20  
|||||||:|||||||  
Sbjct: 558 AACCAACGGGAAACATTCAG 539  
>novel\_mir\_42 Score: 2.0 R03G\_08984  
Query: 1 TTGGTTGCTCTTTGTAAGTC 20  
||||\*|||||||\*|\*  
Sbjct: 431 AACCGACGAGAAACATT-AT 413  
>novel\_mir\_42 Score: 2.5 R03G\_05586  
Query: 1 TTGGTTGCTCTTTGTAAGTC 20  
\*|||||\*|||||||\*|\*  
Sbjct: 689 CACCAACAAGAAACATTGAC 670  
>novel\_mir\_42 Score: 2.0 R03G\_05817  
Query: 1 TTGGTTGCTCTTTGTAAGTC 20  
|||||||\*:\*:|||||\*||  
Sbjct: 26 AACCAACGACGAACATT-AG 8  
>novel\_mir\_42 Score: 2.5 R03G\_04454  
Query: 1 TTGGTTGCTCTTTGTAAGT-C 20  
\*\*||:|||||||\*|  
Sbjct: 291 TCCCGACGAGAAACATTCACG 271  
>novel\_mir\_42 Score: 2.5 R03G\_04754  
Query: 1 TTGGTTGCTCTTTGTAAGTC 20

||||:||||:|\*:||||  
Sbjct: 2420 AACCGACGAGGAAAGTTCAG 2401  
>novel\_mir\_42 Score: 2.2 R03G\_03530  
Query: 1 TTGGTTGCTCTTTGTAAGTC 20  
|||||||\*:||\*|  
Sbjct: 1100 AACCAACGAGAACTATT-GG 1082  
>novel\_mir\_42 Score: 2.2 R03G\_00617  
Query: 1 TTGGTTGCTCTTTGTAAGTC 20  
:||\*|||:|||||||\*|  
Sbjct: 523 GACCCACGGGAAACATTCTG 504  
>novel\_mir\_42 Score: 2.2 R03G\_01302  
Query: 1 TTGGTTGCTCTTTGTAAGTC 20  
:||\*|||:|||||||\*|  
Sbjct: 250 GACCCACGGGAAACATTCTG 231  
>novel\_mir\_42 Score: 2.2 R03G\_17369  
Query: 1 TTGGTTGCTCTTTGTAAGTC 20  
:||\*|||:|||||||\*|  
Sbjct: 679 GACCCACGGGAAACATTCTG 660  
>novel\_mir\_18 Score: 2.0 R03G\_06944  
Query: 1 TGGAGCCAACTGAGATTGAT 20  
||\*||||||:|||||||  
Sbjct: 157 ACATCGGTTGGTTCTAACTA 138  
>novel\_mir\_95 Score: 2.0 R03G\_14951  
Query: 1 TGATGAAGGATAGTGGCATGAT 22  
|||||||\*|||:|\*|||\*  
Sbjct: 1088 ACTACTTCCTATCGCTGGAATC 1067  
>novel\_mir\_95 Score: 2.0 R03G\_04525  
Query: 1 TGATGAAGGATAGTGGCATGAT 22  
|||||||\*|||:|\*|||\*  
Sbjct: 1079 ACTACTTCCTATCGCTGGAATC 1058  
>novel\_mir\_95 Score: 2.0 R03G\_04544  
Query: 1 TGATGAAGGATAGTGGCATGAT 22  
|||||||\*|||:|\*|||\*  
Sbjct: 1022 ACTACTTCCTATCGCTGGAATC 1001  
>novel\_mir\_95 Score: 2.0 R03G\_03979  
Query: 1 TGATGAAGGATAGTGGCATGAT 22  
|||||||\*|||||||\*||\*|  
Sbjct: 632 ACTACTTCATATCACCG-ACGA 612  
>novel\_mir\_13 Score: 2.5 R03G\_15104  
Query: 1 TACGTTTCAGGTAAGAGAGGA 20  
:|\*|:|||||||:|  
Sbjct: 884 GTACGGGTCCATTCTCTTCT 865  
>novel\_mir\_13 Score: 1.0 R03G\_11961  
Query: 1 TACGTTTCAGGTAAGAGAGGA 20  
|||||||\*|||||||

Sbjct: 571 ATGCAAGCCCATTCTCTCCT 552  
>novel\_mir\_13 Score: 2.0 R03G\_10247  
Query: 1 TACG TTCAGGTAAGAGAGGA 20  
\*||||:||||:||||||\*||  
Sbjct: 469 TTGCAGGTCTATTCTCT-CT 451  
>novel\_mir\_13 Score: 0.0 R03G\_09594  
Query: 1 TACG TTCAGGTAAGAGAGGA 20  
|||||||  
Sbjct: 66 ATGCAAGTCCATTCTCTCCT 47  
>novel\_mir\_13 Score: 2.5 R03G\_06102  
Query: 1 TACG TTCAGGTAAGAGAGGA 20  
|||||||:|\*|||  
Sbjct: 196 ATGCAAGTCTGTTCTCGACT 177  
>novel\_mir\_13 Score: 2.0 R03G\_06107  
Query: 1 TACG TTCAGGTAAGAGAGGA 20  
:||||:||||\*||||:|  
Sbjct: 1190 GTGCAGGTCCACTCTCTTCT 1171  
>novel\_mir\_19 Score: 0.0 R03G\_06718  
Query: 1 TGGTCTGTAGGATCGAGTACTA 22  
|||||||  
Sbjct: 128 ACCAGACATCCTAGCTCATGAT 107  
>novel\_mir\_124 Score: 1.8 R03G\_17265  
Query: 1 TGCTCTTGTTGCTGTTGTTG 20  
||||\*|:|||||||:|  
Sbjct: 269 ACGACGACAACGACAACGAC 250  
>novel\_mir\_124 Score: 0.0 R03G\_17242  
Query: 1 TGCTCTTGTTGCTGTTGTTG 20  
|||||||  
Sbjct: 338 ACGAGAACAACGACAACAAC 319  
>novel\_mir\_124 Score: 1.8 R03G\_17244  
Query: 1 TGCTCTTGTTGCTGTTGTTG 20  
||||\*|:|||||||:|  
Sbjct: 365 ACGACGACAACGACAACGAC 346  
>novel\_mir\_124 Score: 2.5 R03G\_17175  
Query: 1 TGCTCTTGTTGCTGTTGTTG 20  
||||\*|:\*|\*|||||||  
Sbjct: 134 ACGAGTATTACGACAACAAC 115  
>novel\_mir\_124 Score: 2.5 R03G\_17036  
Query: 1 TGCTCTTGTTGCTGTTGTTG 20  
||\*|||||:||||\*||||  
Sbjct: 1742 ACAAGAACGACGACTACAAC 1723  
>novel\_mir\_124 Score: 2.5 R03G\_17050  
Query: 1 TGCTCTTGTTGCTGTTGTTG 20  
\*|:|||||:|||||:|\*||  
Sbjct: 211 CTGAGAACGACGACGAC-AC 193

>novel\_mir\_124 Score: 2.5 R03G\_17055  
Query: 1 TGCTCTTGTTGCTGTTGTTG 20  
\*|||\*|||||\*|||||||  
Sbjct: 2243 TCGAAAACAACAACAACAAC 2224

>novel\_mir\_124 Score: 1.8 R03G\_16901  
Query: 1 TGCTCTTGTTGCTGTTGTTG 20  
||||\*:|||||||:|  
Sbjct: 374 ACGACGACAACGACAACGAC 355

>novel\_mir\_124 Score: 1.8 R03G\_16917  
Query: 1 TGCTCTTGTTGCTGTTGTTG 20  
||||\*:|||||||:|  
Sbjct: 380 ACGACGACAACGACAACGAC 361

>novel\_mir\_124 Score: 1.8 R03G\_16743  
Query: 1 TGCTCTTGTTGCTGTTGTTG 20  
||||\*:|||||||:|  
Sbjct: 326 ACGACGACAACGACAACGAC 307

>novel\_mir\_124 Score: 2.0 R03G\_16582  
Query: 1 TGCTCTTGTTGCTGTTGTTG 20  
||\*|||||:|||||:|||||  
Sbjct: 134 ACAAGAACGACGACGACAAC 115

>novel\_mir\_124 Score: 2.5 R03G\_16607  
Query: 1 TGCTCTTGTTGCTGTTGTTG 20  
||\*|||\*|||||||\*||  
Sbjct: 918 ACCACAACAACGACAACCAC 899

>novel\_mir\_124 Score: 2.2 R03G\_16607  
Query: 1 TGCTCTTGTTGCTGTTGTTG 20  
\*:||\*|||||||:|  
Sbjct: 805 TTGACAACAACGACAACGAC 786

>novel\_mir\_124 Score: 1.5 R03G\_16618  
Query: 1 TGCTCTTGTTGCTGTTGTTG 20  
||||\*:|||||||:|  
Sbjct: 2273 ACGACGACAACGACAACAAC 2254

>novel\_mir\_124 Score: 1.8 R03G\_16369  
Query: 1 TGCTCTTGTTGCTGTTGTTG 20  
||||\*:|||||||:|  
Sbjct: 347 ACGACGACAACGACAACGAC 328

>novel\_mir\_124 Score: 2.0 R03G\_16404  
Query: 1 TGCTCTTGTTGCTGTTGTTG 20  
||||\*|||||\*|||||||  
Sbjct: 665 ACGACAACAACAACAACAAC 646

>novel\_mir\_124 Score: 2.5 R03G\_16404  
Query: 1 TGCTCTTGTTGCTGTTGTTG 20  
||\*|||\*|||||||\*  
Sbjct: 641 ACAACAACAACGACAACAAG 622

>novel\_mir\_124 Score: 2.5 R03G\_16460

Query: 1 TGCTCTTGTTGCTGTTGTTG 20  
||\*|||:|||||||  
Sbjct: 608 ACAACAACGACGACAACAAC 589  
>novel\_mir\_124 Score: 2.2 R03G\_16481  
Query: 1 TGCTCTTGTTGCTGTTGTTG 20  
|\*||\*|||:|||||||  
Sbjct: 297 AGGATAACAACGACAACAAT 278  
>novel\_mir\_124 Score: 2.5 R03G\_16187  
Query: 1 TGCTCTTGTTGCTGTTGTTG 20  
\*||\*|||\*|||:|||||||  
Sbjct: 470 TCGACAACAACAACAACAAC 451  
>novel\_mir\_124 Score: 2.0 R03G\_16262  
Query: 1 TGCTCTTGTTGCTGTTGTTG 20  
||||\*|||\*|||:|||||||  
Sbjct: 166 ACGACAACAACAACAACAAC 147  
>novel\_mir\_124 Score: 1.5 R03G\_16322  
Query: 1 TGCTCTTGTTGCTGTTGTTG 20  
||||\*|||\*|||\*|||:|||||||  
Sbjct: 797 ACGACAACAACGACAACACC 778  
>novel\_mir\_124 Score: 2.0 R03G\_16326  
Query: 1 TGCTCTTGTTGCTGTTGTTG 20  
||||\*|||\*|||\*|||:|||||||  
Sbjct: 698 ACGACAACAACAACAACAAC 679  
>novel\_mir\_124 Score: 1.5 R03G\_16326  
Query: 1 TGCTCTTGTTGCTGTTGTTG 20  
||||\*|||:|||||||  
Sbjct: 665 ACGACAACGACGACAACAAC 646  
>novel\_mir\_124 Score: 1.8 R03G\_15879  
Query: 1 TGCTCTTGTTGCTGTTGTTG 20  
||||\*|||\*|||\*|||:|||||||  
Sbjct: 287 ACGACGACAACGACAACGAC 268  
>novel\_mir\_124 Score: 2.2 R03G\_15887  
Query: 1 TGCTCTTGTTGCTGTTGTTG 20  
||\*||\*|||\*|||\*|||:|||||||  
Sbjct: 386 ACAACAACAACGACAACGAC 367  
>novel\_mir\_124 Score: 1.0 R03G\_15960  
Query: 1 TGCTCTTGTTGCTGTTGTTG 20  
||||\*|||\*|||\*|||:|||||||  
Sbjct: 1610 ACGACAACAACGACAACAAC 1591  
>novel\_mir\_124 Score: 2.0 R03G\_15999  
Query: 1 TGCTCTTGTTGCTGTTGTTG 20  
||||\*|||\*|||\*|||:|||||||  
Sbjct: 935 ACGACAACAACAACAACAAC 916  
>novel\_mir\_124 Score: 2.2 R03G\_16075  
Query: 1 TGCTCTTGTTGCTGTTGTTG 20



||||\*|||:|||||||\*|:  
Sbjct: 59 ACGACAACGACGACAACACTAT 40  
>novel\_mir\_124 Score: 2.2 R03G\_16114  
Query: 1 TGCTCTTGTTGCTGTTGTTG 20  
||\*|||:|||||||:  
Sbjct: 215 ACTACAACAACGACAACGAC 196  
>novel\_mir\_124 Score: 0.0 R03G\_16127  
Query: 1 TGCTCTTGTTGCTGTTGTTG 20  
|||||||:  
Sbjct: 338 ACGAGAACAACGACAACAAC 319  
>novel\_mir\_124 Score: 1.5 R03G\_15592  
Query: 1 TGCTCTTGTTGCTGTTGTTG 20  
||||\*|||:|||||  
Sbjct: 558 ACGACAACAACGACGACAAC 539  
>novel\_mir\_124 Score: 2.2 R03G\_15594  
Query: 1 TGCTCTTGTTGCTGTTGTTG 20  
|||||||\*|||:  
Sbjct: 665 ACGAGAACAACAAGAACGAC 646  
>novel\_mir\_124 Score: 2.5 R03G\_15633  
Query: 1 TGCTCTTGTTGCTGTTGTTG 20  
||\*|||:|||||||:  
Sbjct: 677 ACAACGACAACGACAACAAC 658  
>novel\_mir\_124 Score: 2.5 R03G\_15299  
Query: 1 TGCTCTTGTTGCTGTTGTTG 20  
||||\*|||\*|||:  
Sbjct: 998 ACGACGACAACAACAACAAC 979  
>novel\_mir\_124 Score: 2.5 R03G\_15299  
Query: 1 TGCTCTTGTTGCTGTTGTTG 20  
\*\*\*|||||||:  
Sbjct: 638 TGAAGAACAACGACAACAAC 619  
>novel\_mir\_124 Score: 2.0 R03G\_15329  
Query: 1 TGCTCTTGTTGCTGTTGTTG 20  
||||\*|||\*|||:  
Sbjct: 2945 ACGACAACAACAACAACAAC 2926  
>novel\_mir\_124 Score: 2.0 R03G\_15329  
Query: 1 TGCTCTTGTTGCTGTTGTTG 20  
||||\*|||:|||||||:  
Sbjct: 2921 ACGACGACGACGACAACAAC 2902  
>novel\_mir\_124 Score: 2.5 R03G\_15357  
Query: 1 TGCTCTTGTTGCTGTTGTTG 20  
||||\*|||:|||||||\*|  
Sbjct: 1071 ACGACGACGACGACAACATC 1052  
>novel\_mir\_124 Score: 2.2 R03G\_15357  
Query: 1 TGCTCTTGTTGCTGTTGTTG 20  
||\*|||:|||||||\*|

Sbjct: 324 ACAAGAACGACGACAACAGA 305  
>novel\_mir\_124 Score: 2.5 R03G\_15376  
Query: 1 TGCTCTTGTTGCTGTTGTTG 20  
||||\*|||:||||\*|||||  
Sbjct: 818 ACGAAAACGACGAAAACAAC 799  
>novel\_mir\_124 Score: 1.8 R03G\_15422  
Query: 1 TGCTCTTGTTGCTGTTGTTG 20  
||||\*|||||||:||:|  
Sbjct: 1267 ACGACAACAACGACGACGAC 1248  
>novel\_mir\_124 Score: 2.5 R03G\_15529  
Query: 1 TGCTCTTGTTGCTGTTGTTG 20  
|\*||||\*|||||||\*  
Sbjct: 1166 AGGAGAAGAACGACAACAAA 1147  
>novel\_mir\_124 Score: 2.0 R03G\_14937  
Query: 1 TGCTCTTGTTGCTGTTGTTG 20  
||\*|||||||  
Sbjct: 169 ACAACAACAACGACAACAAC 150  
>novel\_mir\_124 Score: 2.5 R03G\_15018  
Query: 1 TGCTCTTGTTGCTGTTGTTG 20  
||||\*|||:||\*|||||  
Sbjct: 1383 ACGACAACGACAACAACAAC 1364  
>novel\_mir\_124 Score: 2.5 R03G\_15018  
Query: 1 TGCTCTTGTTGCTGTTGTTG 20  
\*:||\*|||||||  
Sbjct: 1103 CTGGCAACAACGACAACAAC 1084  
>novel\_mir\_124 Score: 2.0 R03G\_15031  
Query: 1 TGCTCTTGTTGCTGTTGTTG 20  
||||\*|||||||:|||||  
Sbjct: 1346 ACGACGACAACGACGACAAC 1327  
>novel\_mir\_124 Score: 2.0 R03G\_15065  
Query: 1 TGCTCTTGTTGCTGTTGTTG 20  
||\*|||||||  
Sbjct: 451 ACAACAACAACGACAACAAC 432  
>novel\_mir\_124 Score: 2.5 R03G\_15079  
Query: 1 TGCTCTTGTTGCTGTTGTTG 20  
\*||||\*|||||||\*|  
Sbjct: 689 CCGACAACAACGACAAC-TC 671  
>novel\_mir\_124 Score: 2.0 R03G\_15127  
Query: 1 TGCTCTTGTTGCTGTTGTTG 20  
||\*|||||||  
Sbjct: 34 ACAACAACAACGACAACAAC 15  
>novel\_mir\_124 Score: 2.2 R03G\_15147  
Query: 1 TGCTCTTGTTGCTGTTGTTG 20  
|||\*\*|||||||:|  
Sbjct: 320 ACGTCAACAACGACAACGAC 301

>novel\_mir\_124 Score: 2.0 R03G\_15194  
Query: 1 TGCTCTTGTTGCTGTTGTTG 20  
||\*|||  
Sbjct: 500 ACAACAACAACGACAACAAC 481  
>novel\_mir\_124 Score: 2.0 R03G\_15194  
Query: 1 TGCTCTTGTTGCTGTTGTTG 20  
|||\*|||:|||||\*  
Sbjct: 257 ACGACAACGACGACAACAAA 238  
>novel\_mir\_124 Score: 2.2 R03G\_15218  
Query: 1 TGCTCTTGTTGCTGTTGTTG 20  
|\*|||:|||||\*:  
Sbjct: 245 AGGAGAACGACGACAACATT 226  
>novel\_mir\_124 Score: 2.0 R03G\_15224  
Query: 1 TGCTCTTGTTGCTGTTGTTG 20  
|||\*|||\*|||  
Sbjct: 1155 ACGACAACAACAACAAC 1136  
>novel\_mir\_124 Score: 0.0 R03G\_15256  
Query: 1 TGCTCTTGTTGCTGTTGTTG 20  
|||||  
Sbjct: 338 ACGAGAACAACGACAACAAC 319  
>novel\_mir\_124 Score: 1.2 R03G\_14401  
Query: 1 TGCTCTTGTTGCTGTTGTTG 20  
|||\*|||:|  
Sbjct: 653 ACGACAACAACGACAACGAC 634  
>novel\_mir\_124 Score: 2.0 R03G\_14449  
Query: 1 TGCTCTTGTTGCTGTTGTTG 20  
|||\*|||\*|||  
Sbjct: 36 ACGACAACAACAACAAC 17  
>novel\_mir\_124 Score: 2.2 R03G\_14456  
Query: 1 TGCTCTTGTTGCTGTTGTTG 20  
||\*|||:|  
Sbjct: 623 ACTACAACAACGACAACGAC 604  
>novel\_mir\_124 Score: 1.8 R03G\_14553  
Query: 1 TGCTCTTGTTGCTGTTGTTG 20  
|||\*:|||:|  
Sbjct: 368 ACGACGACAACGACAACGAC 349  
>novel\_mir\_124 Score: 2.5 R03G\_14672  
Query: 1 TGCTCTTGTTGCTGTTGTTG 20  
|||\*:||:|||||:|  
Sbjct: 643 ACGACGACGACGACAATAAC 624  
>novel\_mir\_124 Score: 2.2 R03G\_13941  
Query: 1 TGCTCTTGTTGCTGTTGTTG 20  
\*|||:|||:|:|\*  
Sbjct: 256 CCGAGAACGACGACGACGAA 237  
>novel\_mir\_124 Score: 2.5 R03G\_14005

Query: 1 TGCTCTTGTTGCTGTTGTTG 20  
||||\*||||\*|||||||\*|  
Sbjct: 1199 ACGACAACACCGACAACACC 1180  
>novel\_mir\_124 Score: 2.0 R03G\_14025  
Query: 1 TGCTCTTGTTGCTGTTGTTG 20  
||||\*|||:|||||||\*||  
Sbjct: 2000 ACGAAAACGACGACAAC-AC 1982  
>novel\_mir\_124 Score: 2.5 R03G\_14056  
Query: 1 TGCTCTTGTTGCTGTTGTTG 20  
|:|\*|||||\*|||||||  
Sbjct: 1384 ATGATAACAACAACAAC 1365  
>novel\_mir\_124 Score: 2.5 R03G\_14057  
Query: 1 TGCTCTTGTTGCTGTTGTTG 20  
|:|\*|||||\*|||||||  
Sbjct: 1384 ATGATAACAACAACAAC 1365  
>novel\_mir\_124 Score: 2.2 R03G\_14111  
Query: 1 TGCTCTTGTTGCTGTTGTTG 20  
||\*|\*|||||||:|  
Sbjct: 38 ACAACAACAACGACAACGAC 19  
>novel\_mir\_124 Score: 2.5 R03G\_14199  
Query: 1 TGCTCTTGTTGCTGTTGTTG 20  
||||\*:|||||||:|\*||  
Sbjct: 3290 ACGACGACAACGACGACCAC 3271  
>novel\_mir\_124 Score: 2.0 R03G\_14274  
Query: 1 TGCTCTTGTTGCTGTTGTTG 20  
||||\*|||||\*|||||||  
Sbjct: 233 ACGACAACAACAACAAC 214  
>novel\_mir\_124 Score: 2.0 R03G\_14274  
Query: 1 TGCTCTTGTTGCTGTTGTTG 20  
||||\*|||||||\*|||\*|  
Sbjct: 203 ACGACAACAACGACAAC-TC 185  
>novel\_mir\_124 Score: 2.2 R03G\_14336  
Query: 1 TGCTCTTGTTGCTGTTGTTG 20  
||||\*|||||\*|||:|  
Sbjct: 1502 ACGACAACAACAACAACGAC 1483  
>novel\_mir\_124 Score: 1.8 R03G\_13452  
Query: 1 TGCTCTTGTTGCTGTTGTTG 20  
||||\*:|||||||:|  
Sbjct: 356 ACGACGACAACGACAACGAC 337  
>novel\_mir\_124 Score: 2.5 R03G\_13495  
Query: 1 TGCTCTTGTTGCTGTTGTTG 20  
\*|||\*|\*|||||||  
Sbjct: 146 CCGACATCAACGACAACAAC 127  
>novel\_mir\_124 Score: 2.2 R03G\_13607  
Query: 1 TGCTCTTGTTGCTGTTGTTG 20

||\*|||||:|||||:||:||  
Sbjct: 596 ACAAGAACGACGACGACGAC 577  
>novel\_mir\_124 Score: 0.0 R03G\_13711  
Query: 1 TGCTCTTGTTGCTGTTGTTG 20  
||||||||||||||||||  
Sbjct: 338 ACGAGAACAACGACAACAAC 319  
>novel\_mir\_124 Score: 2.0 R03G\_12697  
Query: 1 TGCTCTTGTTGCTGTTGTTG 20  
||||\*|||||\*|||||||  
Sbjct: 197 ACGACAACAACAACAACAAC 178  
>novel\_mir\_124 Score: 2.5 R03G\_12732  
Query: 1 TGCTCTTGTTGCTGTTGTTG 20  
||\*||\*||||||||||||||\*  
Sbjct: 26 ACAACAACAACGACAACAAA 7  
>novel\_mir\_124 Score: 2.0 R03G\_12746  
Query: 1 TGCTCTTGTTGCTGTTGTTG 20  
||||\*|||||\*|||||||  
Sbjct: 524 ACGACAACAACAACAACAAC 505  
>novel\_mir\_124 Score: 2.0 R03G\_12746  
Query: 1 TGCTCTTGTTGCTGTTGTTG 20  
||||\*|||:|||||||\*||  
Sbjct: 488 ACGACAACGACGACAACCAC 469  
>novel\_mir\_124 Score: 2.0 R03G\_12847  
Query: 1 TGCTCTTGTTGCTGTTGTTG 20  
||||\*|||||\*|||||||  
Sbjct: 623 ACGACAACAACAACAACAAC 604  
>novel\_mir\_124 Score: 1.5 R03G\_12891  
Query: 1 TGCTCTTGTTGCTGTTGTTG 20  
||||\*:||||||||||||||  
Sbjct: 2603 ACGACGACAACGACAACAAC 2584  
>novel\_mir\_124 Score: 2.5 R03G\_12895  
Query: 1 TGCTCTTGTTGCTGTTGTTG 20  
||\*||\*||||||||||||||\*||  
Sbjct: 971 ACAACAACAACGACAAC-AC 953  
>novel\_mir\_124 Score: 2.0 R03G\_12904  
Query: 1 TGCTCTTGTTGCTGTTGTTG 20  
||\*||\*||||||||||||||  
Sbjct: 1027 ACAACAACAACGACAACAAC 1008  
>novel\_mir\_124 Score: 2.0 R03G\_12904  
Query: 1 TGCTCTTGTTGCTGTTGTTG 20  
||||\*|||||\*|||||||  
Sbjct: 827 ACGACAACAACAACAACAAC 808  
>novel\_mir\_124 Score: 2.2 R03G\_12938  
Query: 1 TGCTCTTGTTGCTGTTGTTG 20  
||||\*|||||\*|||||:||

Sbjct: 1310 ACGACAACAACAACGAC 1291  
>novel\_mir\_124 Score: 2.5 R03G\_13025  
Query: 1 TGCTCTTGTTGCTGTTGTTG 20  
||||\*|||||\*||:|||||

Sbjct: 895 ACGACAACAACAACGACAAC 876  
>novel\_mir\_124 Score: 2.2 R03G\_13025  
Query: 1 TGCTCTTGTTGCTGTTGTTG 20  
\*:||\*|||||||:||

Sbjct: 844 TTGACAACAACGACAACGAC 825  
>novel\_mir\_124 Score: 2.2 R03G\_13039  
Query: 1 TGCTCTTGTTGCTGTTGTTG 20  
||||\*|||||\*|||||:||

Sbjct: 653 ACGACAACAACAACAACGAC 634  
>novel\_mir\_124 Score: 2.5 R03G\_13050  
Query: 1 TGCTCTTGTTGCTGTTGTTG 20  
||||\*||\*|||||||:|||||

Sbjct: 2786 ACGACACCAACGACGACAAC 2767  
>novel\_mir\_124 Score: 0.2 R03G\_13072  
Query: 1 TGCTCTTGTTGCTGTTGTTG 20  
|||||||:||

Sbjct: 296 ACGAGAACAACGACAACGAC 277  
>novel\_mir\_124 Score: 1.8 R03G\_12011  
Query: 1 TGCTCTTGTTGCTGTTGTTG 20  
||||\*||\*|||||||:||

Sbjct: 368 ACGACGACAACGACAACGAC 349  
>novel\_mir\_124 Score: 1.8 R03G\_12078  
Query: 1 TGCTCTTGTTGCTGTTGTTG 20  
||||\*||\*|||||||:||

Sbjct: 68 ACGACGACAACGACAACGAC 49  
>novel\_mir\_124 Score: 0.0 R03G\_12192  
Query: 1 TGCTCTTGTTGCTGTTGTTG 20  
|||||||:||

Sbjct: 338 ACGAGAACAACGACAACAAC 319  
>novel\_mir\_124 Score: 2.5 R03G\_12236  
Query: 1 TGCTCTTGTTGCTGTTGTTG 20  
||||\*|||||\*||:|||||

Sbjct: 1646 ACGACAACAACAACGACAAC 1627  
>novel\_mir\_124 Score: 2.2 R03G\_12391  
Query: 1 TGCTCTTGTTGCTGTTGTTG 20  
\*|||||||\*|||||:||:||

Sbjct: 854 CCGAGAACTACGACGACGAC 835  
>novel\_mir\_124 Score: 1.8 R03G\_12391  
Query: 1 TGCTCTTGTTGCTGTTGTTG 20  
||||\*|||||||:||:||

Sbjct: 815 ACGACAACAACGACGACGAC 796

>novel\_mir\_124 Score: 2.2 R03G\_12391  
Query: 1 TGCTCTTGTTGCTGTTGTTG 20  
||\*|||:|||||  
Sbjct: 791 ACAACAACAACGACAACGAC 772  
>novel\_mir\_124 Score: 1.5 R03G\_11135  
Query: 1 TGCTCTTGTTGCTGTTGTTG 20  
||\*|||:|||||  
Sbjct: 554 ACAAGAACGACGACAACAAC 535  
>novel\_mir\_124 Score: 2.0 R03G\_11158  
Query: 1 TGCTCTTGTTGCTGTTGTTG 20  
||||\*||||\*|||||  
Sbjct: 62 ACGACAACAACAACAACAAC 43  
>novel\_mir\_124 Score: 1.0 R03G\_11219  
Query: 1 TGCTCTTGTTGCTGTTGTTG 20  
||||\*|||||  
Sbjct: 1784 ACGACAACAACGACAACAAC 1765  
>novel\_mir\_124 Score: 2.5 R03G\_11398  
Query: 1 TGCTCTTGTTGCTGTTGTTG 20  
\*||\*|||:|||||  
Sbjct: 92 CCCATAACAACGACAACAAC 73  
>novel\_mir\_124 Score: 1.8 R03G\_11543  
Query: 1 TGCTCTTGTTGCTGTTGTTG 20  
||||\*:|||||:|||  
Sbjct: 368 ACGACGACAACGACAACGAC 349  
>novel\_mir\_124 Score: 2.2 R03G\_11614  
Query: 1 TGCTCTTGTTGCTGTTGTTG 20  
||||\*:|||||:||:||  
Sbjct: 107 ACGACGACAACGACGACGAC 88  
>novel\_mir\_124 Score: 1.8 R03G\_11678  
Query: 1 TGCTCTTGTTGCTGTTGTTG 20  
||||\*:|||||:|||  
Sbjct: 869 ACGACGACAACGACAACGAC 850  
>novel\_mir\_124 Score: 2.0 R03G\_11678  
Query: 1 TGCTCTTGTTGCTGTTGTTG 20  
||\*|||:|||||  
Sbjct: 839 ACAACAACAACGACAACAAC 820  
>novel\_mir\_124 Score: 2.0 R03G\_11763  
Query: 1 TGCTCTTGTTGCTGTTGTTG 20  
||\*|||:|||||  
Sbjct: 89 AGAAGAACAACGACAACAAC 70  
>novel\_mir\_124 Score: 2.2 R03G\_11840  
Query: 1 TGCTCTTGTTGCTGTTGTTG 20  
\*|||:||:|||||:|\*  
Sbjct: 579 TCGAGGACGACGACAACGAA 560  
>novel\_mir\_124 Score: 2.0 R03G\_11865

Query: 1 TGCTCTTGTTGCTGTTGTTG 20  
||||\*|||||\*|||||||  
Sbjct: 371 ACGACAACAACAACAAC 352  
>novel\_mir\_124 Score: 2.2 R03G\_11865  
Query: 1 TGCTCTTGTTGCTGTTGTTG 20  
||\*|||:|  
Sbjct: 350 ACAACAACGACAACGAC 331  
>novel\_mir\_124 Score: 2.5 R03G\_11868  
Query: 1 TGCTCTTGTTGCTGTTGTTG 20  
||||\*:||:||||:||||  
Sbjct: 1664 ACGACGACGACGACAAC 1645  
>novel\_mir\_124 Score: 2.0 R03G\_11868  
Query: 1 TGCTCTTGTTGCTGTTGTTG 20  
||||\*|||||\*|||||||  
Sbjct: 869 ACGACAACAACAACAAC 850  
>novel\_mir\_124 Score: 2.5 R03G\_11915  
Query: 1 TGCTCTTGTTGCTGTTGTTG 20  
|:\*|||||\*|||||||  
Sbjct: 1058 ATAAGAACAACAACAAC 1039  
>novel\_mir\_124 Score: 2.2 R03G\_10269  
Query: 1 TGCTCTTGTTGCTGTTGTTG 20  
\*\*|||||:|||||||:|  
Sbjct: 974 TAGAGAACGACGACAACGAC 955  
>novel\_mir\_124 Score: 2.5 R03G\_10319  
Query: 1 TGCTCTTGTTGCTGTTGTTG 20  
\*|||\*|||\*|||||||  
Sbjct: 392 CCGACAACGACAACAAC 373  
>novel\_mir\_124 Score: 2.0 R03G\_10396  
Query: 1 TGCTCTTGTTGCTGTTGTTG 20  
||||\*|||||\*|||||||  
Sbjct: 419 ACGACAACAACAACAAC 400  
>novel\_mir\_124 Score: 1.2 R03G\_10399  
Query: 1 TGCTCTTGTTGCTGTTGTTG 20  
\*|||||||:||:|  
Sbjct: 440 CCGAGAACAACGACGACGAC 421  
>novel\_mir\_124 Score: 2.2 R03G\_10399  
Query: 1 TGCTCTTGTTGCTGTTGTTG 20  
||||\*|||||\*||||:|  
Sbjct: 419 ACGACAACAACAACAACGAC 400  
>novel\_mir\_124 Score: 2.0 R03G\_10399  
Query: 1 TGCTCTTGTTGCTGTTGTTG 20  
||||\*|||||\*|||||||  
Sbjct: 383 ACGACAACAACAACAAC 364  
>novel\_mir\_124 Score: 2.5 R03G\_10401  
Query: 1 TGCTCTTGTTGCTGTTGTTG 20





Sbjct: 2588 ACGACAACAACAACAAC 2569  
>novel\_mir\_124 Score: 2.0 R03G\_10815  
Query: 1 TGCTCTTGTTGCTGTTGTTG 20  
||||\*|||:|||||:|||||

Sbjct: 2567 ACGACAACGACGACGACAAC 2548  
>novel\_mir\_124 Score: 1.8 R03G\_10815  
Query: 1 TGCTCTTGTTGCTGTTGTTG 20  
||||\*|||||||:||:|

Sbjct: 2012 ACGACAACAACGACGACGAC 1993  
>novel\_mir\_124 Score: 2.2 R03G\_10831  
Query: 1 TGCTCTTGTTGCTGTTGTTG 20  
||||\*||:|||||||:|

Sbjct: 1106 ACGACGACGACGACAACGAC 1087  
>novel\_mir\_124 Score: 2.2 R03G\_10831  
Query: 1 TGCTCTTGTTGCTGTTGTTG 20  
||||\*|||||\*|||||:|

Sbjct: 62 ACGACAACAACAACAACGAC 43  
>novel\_mir\_124 Score: 2.2 R03G\_10848  
Query: 1 TGCTCTTGTTGCTGTTGTTG 20  
||||\*|||||\*|||||:|

Sbjct: 2045 ACGACAACAACAACAACGAC 2026  
>novel\_mir\_124 Score: 2.0 R03G\_10851  
Query: 1 TGCTCTTGTTGCTGTTGTTG 20  
||||\*|||||\*|||||||

Sbjct: 344 ACGACAACAACAACAAC 325  
>novel\_mir\_124 Score: 1.8 R03G\_10883  
Query: 1 TGCTCTTGTTGCTGTTGTTG 20  
||||\*|||||||:|

Sbjct: 1778 ACGACGACAACGACAACGAC 1759  
>novel\_mir\_124 Score: 2.5 R03G\_10931  
Query: 1 TGCTCTTGTTGCTGTTGTTG 20  
||\*|\*:|||||||

Sbjct: 410 ACAACGACAACGACAACAAC 391  
>novel\_mir\_124 Score: 2.0 R03G\_10935  
Query: 1 TGCTCTTGTTGCTGTTGTTG 20  
||||\*|||:|||||:|||||

Sbjct: 1337 ACGACAACGACGACGACAAC 1318  
>novel\_mir\_124 Score: 2.0 R03G\_10995  
Query: 1 TGCTCTTGTTGCTGTTGTTG 20  
||||\*|||||\*|||||||

Sbjct: 1688 ACGACAACAACAACAAC 1669  
>novel\_mir\_124 Score: 2.0 R03G\_10995  
Query: 1 TGCTCTTGTTGCTGTTGTTG 20  
||\*|\*|||||||

Sbjct: 1664 ACAACAACAACGACAACAAC 1645

>novel\_mir\_124 Score: 1.5 R03G\_10995  
Query: 1 TGCTCTTGTTGCTGTTGTTG 20  
|||||:||||\*|||||||  
Sbjct: 1442 ACGAGAGCAACAACAACAAC 1423

>novel\_mir\_124 Score: 2.5 R03G\_09290  
Query: 1 TGCTCTTGTTGCTGTTGTTG 20  
||\*||:|||||||  
Sbjct: 189 ACAACAATAACGACAACAAC 170

>novel\_mir\_124 Score: 2.5 R03G\_09422  
Query: 1 TGCTCTTGTTGCTGTTGTTG 20  
||||\*:||||\*|||||||  
Sbjct: 2687 ACGACGACAACAACAACAAC 2668

>novel\_mir\_124 Score: 2.2 R03G\_09497  
Query: 1 TGCTCTTGTTGCTGTTGTTG 20  
||||\*|||:|||||:||:|  
Sbjct: 74 ACGACAACGACGACGACGAC 55

>novel\_mir\_124 Score: 2.2 R03G\_09557  
Query: 1 TGCTCTTGTTGCTGTTGTTG 20  
:||||\*|||||\*|||||||  
Sbjct: 3554 GCGACAACAACAACAACAAC 3535

>novel\_mir\_124 Score: 2.5 R03G\_09557  
Query: 1 TGCTCTTGTTGCTGTTGTTG 20  
\*||||\*||||\*|||||||  
Sbjct: 1757 CCGACAACACCGACAACAAC 1738

>novel\_mir\_124 Score: 2.5 R03G\_09692  
Query: 1 TGCTCTTGTTGCTGTTGTTG 20  
\*|||||\*|||\*|||||||  
Sbjct: 3578 CCGAGAAAAACAACAACAAC 3559

>novel\_mir\_124 Score: 2.0 R03G\_09692  
Query: 1 TGCTCTTGTTGCTGTTGTTG 20  
||||\*|||||||\*|||  
Sbjct: 420 ACGACAACAACGACATCAAC 401

>novel\_mir\_124 Score: 2.0 R03G\_09721  
Query: 1 TGCTCTTGTTGCTGTTGTTG 20  
||||\*|||||\*|||||||  
Sbjct: 608 ACGACAACAACAACAACAAC 589

>novel\_mir\_124 Score: 2.0 R03G\_09758  
Query: 1 TGCTCTTGTTGCTGTTGTTG 20  
||||\*|||||\*|||||||  
Sbjct: 1157 ACGACAACAACAACAACAAC 1138

>novel\_mir\_124 Score: 2.5 R03G\_09763  
Query: 1 TGCTCTTGTTGCTGTTGT-TG 20  
|\*\*|||||||\*||  
Sbjct: 350 AGAAGAACAACGACAACAGAC 330

>novel\_mir\_124 Score: 2.5 R03G\_09776

Query: 1 TGCTCTTGTTGCTGTTGTTG 20  
\*|||\*|||||\*|||||||  
Sbjct: 758 TCGACAACAACAACAAC 739  
>novel\_mir\_124 Score: 1.0 R03G\_09793  
Query: 1 TGCTCTTGTTGCTGTTGTTG 20  
||||\*|||||||  
Sbjct: 455 ACGACAACAACGACAACAAC 436  
>novel\_mir\_124 Score: 1.8 R03G\_09884  
Query: 1 TGCTCTTGTTGCTGTTGTTG 20  
|||||||:|||||:|:|\*  
Sbjct: 275 ACGAGAACGACGACGACGAG 256  
>novel\_mir\_124 Score: 2.0 R03G\_09894  
Query: 1 TGCTCTTGTTGCTGTTGTTG 20  
||\*|||||||\*|||||||  
Sbjct: 2000 ACAAGAACAACAACAAC 1981  
>novel\_mir\_124 Score: 2.5 R03G\_09990  
Query: 1 TGCTCTTGTTGCTGTTGTTG 20  
||\*|\*|||||||:|  
Sbjct: 944 ACAACAACAACGACAACGGC 925  
>novel\_mir\_124 Score: 1.8 R03G\_10043  
Query: 1 TGCTCTTGTTGCTGTTGTTG 20  
||||\*|:|||||||:|  
Sbjct: 362 ACGACGACAACGACAACGAC 343  
>novel\_mir\_124 Score: 0.0 R03G\_10048  
Query: 1 TGCTCTTGTTGCTGTTGTTG 20  
|||||||  
Sbjct: 338 ACGAGAACAACGACAACAAC 319  
>novel\_mir\_124 Score: 2.5 R03G\_10202  
Query: 1 TGCTCTTGTTGCTGTTGTTG 20  
\*||||||\*\*|||||||  
Sbjct: 938 TCGAGAAGTACGACAACAAC 919  
>novel\_mir\_124 Score: 2.5 R03G\_10202  
Query: 1 TGCTCTTGTTGCTGTTGTTG 20  
||||\*|\*|\*|||||||  
Sbjct: 785 ACGACGACCACGACAACAAC 766  
>novel\_mir\_124 Score: 2.5 R03G\_08100  
Query: 1 TGCTCTTGTTGCTGTTGTTG 20  
||||\*|:|||||\*  
Sbjct: 29 ACGACGACAACGACGACAAG 10  
>novel\_mir\_124 Score: 1.0 R03G\_08120  
Query: 1 TGCTCTTGTTGCTGTTGTTG 20  
||||\*|||||||  
Sbjct: 1100 ACGACAACAACGACAACAAC 1081  
>novel\_mir\_124 Score: 2.0 R03G\_08194  
Query: 1 TGCTCTTGTTGCTGTTGTTG 20

||||\*|||||\*|||||||  
Sbjct: 2162 ACGACAACAACAACAAC 2143  
>novel\_mir\_124 Score: 2.5 R03G\_08408  
Query: 1 TGCTCTTGTTGCTGTTGTTG 20  
|\*|\*|:|||||||  
Sbjct: 767 AGGACAGCAACGACAACAAC 748  
>novel\_mir\_124 Score: 2.0 R03G\_08516  
Query: 1 TGCTCTTGTTGCTGTTGTTG 20  
||||\*:||:|||||||  
Sbjct: 89 ACGACGACGACGACAACAAC 70  
>novel\_mir\_124 Score: 1.5 R03G\_08547  
Query: 1 TGCTCTTGTTGCTGTTGTTG 20  
||||\*|||:|||||||  
Sbjct: 272 ACGACAACGACGACAACAAC 253  
>novel\_mir\_124 Score: 2.0 R03G\_08547  
Query: 1 TGCTCTTGTTGCTGTTGTTG 20  
||||\*|||||\*|||||||  
Sbjct: 245 ACGACAACAACAACAACAAC 226  
>novel\_mir\_124 Score: 2.5 R03G\_08576  
Query: 1 TGCTCTTGTTGCTGTTGTTG 20  
||||\*|||||:||:||\*||  
Sbjct: 274 ACGATAACAATGATAAC-AC 256  
>novel\_mir\_124 Score: 2.5 R03G\_08602  
Query: 1 TGCTCTTGTTGCTGTTGTTG 20  
|:||\*|||||\*|||||||  
Sbjct: 563 ATGACAACAACAACAACAAC 544  
>novel\_mir\_124 Score: 1.5 R03G\_08607  
Query: 1 TGCTCTTGTTGCTGTTGTTG 20  
|||:\*|||||||  
Sbjct: 1448 ACGGCAACAACGACAACAAC 1429  
>novel\_mir\_124 Score: 2.0 R03G\_08623  
Query: 1 TGCTCTTGTTGCTGTTGTTG 20  
||||\*|||||\*|||||||  
Sbjct: 1061 ACGACAACAACAACAACAAC 1042  
>novel\_mir\_124 Score: 1.2 R03G\_08675  
Query: 1 TGCTCTTGTTGCTGTTGTTG 20  
||||\*|||||||:||  
Sbjct: 233 ACGACAACAACGACAACGAC 214  
>novel\_mir\_124 Score: 2.0 R03G\_08675  
Query: 1 TGCTCTTGTTGCTGTTGTTG 20  
||\*|\*|||||||  
Sbjct: 122 ACAACAACAACGACAACAAC 103  
>novel\_mir\_124 Score: 2.2 R03G\_08704  
Query: 1 TGCTCTTGTTGCTGTTGTTG 20  
||\*|\*|||||||:||

Sbjct: 2372 ACAACAACAACGACAACGAC 2353  
>novel\_mir\_124 Score: 1.8 R03G\_08704  
Query: 1 TGCTCTTGTTGCTGTTGTTG 20  
||||\*|||:|||||||:||  
Sbjct: 2144 ACGACAACGACGACAACGAC 2125  
>novel\_mir\_124 Score: 2.2 R03G\_08772  
Query: 1 TGCTCTTGTTGCTGTTGTTG 20  
||||\*:|||||||:||:||  
Sbjct: 2897 ACGACGACAACGACGACGAC 2878  
>novel\_mir\_124 Score: 1.8 R03G\_08774  
Query: 1 TGCTCTTGTTGCTGTTGTTG 20  
||||\*|||||||:||:||  
Sbjct: 233 ACGACAACAACGACGACGAC 214  
>novel\_mir\_124 Score: 2.5 R03G\_08774  
Query: 1 TGCTCTTGTTGCTGTTGTTG 20  
||\*|||:|||||||  
Sbjct: 191 ACAACAACGACGACAACAAC 172  
>novel\_mir\_124 Score: 2.5 R03G\_08824  
Query: 1 TGCTCTTGTTGCTGTTGTTG 20  
|||||||\*||:||||  
Sbjct: 89 ACGAGAACATCAACGACAAC 70  
>novel\_mir\_124 Score: 2.0 R03G\_08864  
Query: 1 TGCTCTTGTTGCTGTTGTTG 20  
||||\*:||:|||||||  
Sbjct: 131 ACGACGACGACGACAACAAC 112  
>novel\_mir\_124 Score: 2.2 R03G\_08870  
Query: 1 TGCTCTTGTTGCTGTTGTTG 20  
||\*|||:|||||||:||  
Sbjct: 362 ACAACAACAACGACAACGAC 343  
>novel\_mir\_124 Score: 1.8 R03G\_08882  
Query: 1 TGCTCTTGTTGCTGTTGTTG 20  
||||\*|||:|||||||:||  
Sbjct: 4175 ACGACAACGACGACAACGAC 4156  
>novel\_mir\_124 Score: 2.0 R03G\_08883  
Query: 1 TGCTCTTGTTGCTGTTGTTG 20  
||||\*||||\*|||||  
Sbjct: 596 ACGACAACAACAACAACAAC 577  
>novel\_mir\_124 Score: 2.0 R03G\_08982  
Query: 1 TGCTCTTGTTGCTGTTGTTG 20  
||||\*:||:|||||||  
Sbjct: 209 ACGACGACGACGACAACAAC 190  
>novel\_mir\_124 Score: 2.5 R03G\_08982  
Query: 1 TGCTCTTGTTGCTGTTGTTG 20  
||||\*:||:|||||||\*|  
Sbjct: 101 ACGACGACGACGACAACACC 82

>novel\_mir\_124 Score: 2.0 R03G\_08982  
Query: 1 TGCTCTTGTTGCTGTTGTTG 20  
||||\*:|||||||:|||||  
Sbjct: 80 ACGACGACAACGACGACAAC 61  
>novel\_mir\_124 Score: 2.5 R03G\_09029  
Query: 1 TGCTCTTGTTGCTGTTGTTG 20  
||||\*:||:|||||:|||||  
Sbjct: 2351 ACGACGACGACGACGACAAC 2332  
>novel\_mir\_124 Score: 1.0 R03G\_09037  
Query: 1 TGCTCTTGTTGCTGTTGTTG 20  
||||\*|||||||  
Sbjct: 764 ACGACAACAACGACAACAAC 745  
>novel\_mir\_124 Score: 2.0 R03G\_09085  
Query: 1 TGCTCTTGTTGCTGTTGTTG 20  
||||\*|||||\*|||||||  
Sbjct: 857 ACGACAACAACAACAACAAC 838  
>novel\_mir\_124 Score: 1.5 R03G\_09085  
Query: 1 TGCTCTTGTTGCTGTTGTTG 20  
||||\*|||||||:|||||  
Sbjct: 800 ACGACAACAACGACGACAAC 781  
>novel\_mir\_124 Score: 1.0 R03G\_09085  
Query: 1 TGCTCTTGTTGCTGTTGTTG 20  
||||\*|||||||  
Sbjct: 776 ACGACAACAACGACAACAAC 757  
>novel\_mir\_124 Score: 2.5 R03G\_09111  
Query: 1 TGCTCTTGTTGCTGTTGTTG 20  
||||\*:||||:|||||||::  
Sbjct: 2032 ACGACGACAATGACAACAGT 2013  
>novel\_mir\_124 Score: 0.0 R03G\_09184  
Query: 1 TGCTCTTGTTGCTGTTGTTG 20  
|||||||  
Sbjct: 50 ACGAGAACAACGACAACAAC 31  
>novel\_mir\_124 Score: 2.2 R03G\_06990  
Query: 1 TGCTCTTGTTGCTGTTGTTG 20  
||||\*:|||||||:::  
Sbjct: 302 ACGACGACAACGACAACGGT 283  
>novel\_mir\_124 Score: 2.0 R03G\_07012  
Query: 1 TGCTCTTGTTGCTGTTGTTG 20  
||||\*|||||\*|||||||  
Sbjct: 599 ACGACAACAACAACAACAAC 580  
>novel\_mir\_124 Score: 2.5 R03G\_07013  
Query: 1 TGCTCTTGTTGCTGTTGTTG 20  
||\*|||||:||||\*|||||  
Sbjct: 1076 ACAAGAACGACGAAAACAAC 1057  
>novel\_mir\_124 Score: 1.5 R03G\_07091

Query: 1 TGCTCTTGTTGCTGTTGTTG 20  
||||\*|||||||:|||||  
Sbjct: 608 ACGACAACAACGACGACAAC 589  
>novel\_mir\_124 Score: 0.0 R03G\_07115  
Query: 1 TGCTCTTGTTGCTGTTGTTG 20  
|||||||  
Sbjct: 299 ACGAGAACAACGACAACAAC 280  
>novel\_mir\_124 Score: 2.5 R03G\_07164  
Query: 1 TGCTCTTGTTGCTGTTGTTG 20  
:||||\*|||||\*|||||:||  
Sbjct: 3017 GCGACAACAACAACGAC 2998  
>novel\_mir\_124 Score: 1.8 R03G\_07164  
Query: 1 TGCTCTTGTTGCTGTTGTTG 20  
\*||||\*|||||||:||  
Sbjct: 1979 TCGACAACAACGACAACGAC 1960  
>novel\_mir\_124 Score: 2.0 R03G\_07164  
Query: 1 TGCTCTTGTTGCTGTTGTTG 20  
||||\*:|||||||\*|  
Sbjct: 638 ACGACGACAACGACAACACC 619  
>novel\_mir\_124 Score: 2.5 R03G\_07164  
Query: 1 TGCTCTTGTTGCTGTTGTTG 20  
\*|\*:||||:|||||||  
Sbjct: 65 TCTGGAACGACGACAACAAC 46  
>novel\_mir\_124 Score: 2.2 R03G\_07234  
Query: 1 TGCTCTTGTTGCTGTTGTTG 20  
||||\*:||:|||||||:||  
Sbjct: 308 ACGACGACGACGACAACGAC 289  
>novel\_mir\_124 Score: 2.5 R03G\_07281  
Query: 1 TGCTCTTGTTGCTGTTGTTG 20  
||||\*|||||\*||:|||||  
Sbjct: 393 ACGAAAACAACAACGACAAC 374  
>novel\_mir\_124 Score: 2.0 R03G\_07466  
Query: 1 TGCTCTTGTTGCTGTTGTTG 20  
||||\*|||||\*|||||||  
Sbjct: 1748 ACGACAACAACAACAACAAC 1729  
>novel\_mir\_124 Score: 2.2 R03G\_07589  
Query: 1 TGCTCTTGTTGCTGTTGTTG 20  
||||\*:|||||||\*||\*:  
Sbjct: 326 ACGACGACAACGACAACATT 307  
>novel\_mir\_124 Score: 1.8 R03G\_07615  
Query: 1 TGCTCTTGTTGCTGTTGTTG 20  
||||\*:|||||||:||  
Sbjct: 707 ACGACGACAACGACAACGAC 688  
>novel\_mir\_124 Score: 1.5 R03G\_07615  
Query: 1 TGCTCTTGTTGCTGTTGTTG 20



||||\*|||||||:|||||  
Sbjct: 611 ACGACAACAACGACGACAAC 592  
>novel\_mir\_124 Score: 2.0 R03G\_07652  
Query: 1 TGCTCTTGTTGCTGTTGTTG 20  
||||\*:|||||||\*  
Sbjct: 1142 ACGACGACAACGACAACAAG 1123  
>novel\_mir\_124 Score: 1.8 R03G\_07692  
Query: 1 TGCTCTTGTTGCTGTTGTTG 20  
||||\*:|||||||:||  
Sbjct: 302 ACGACGACAACGACAACGAC 283  
>novel\_mir\_124 Score: 2.5 R03G\_07749  
Query: 1 TGCTCTTGTTGCTGTTGTTG 20  
\*:\*:|||||||  
Sbjct: 260 TTCGGAACAACGACAACAAC 241  
>novel\_mir\_124 Score: 2.5 R03G\_07795  
Query: 1 TGCTCTTGTTGCTGTTGTTG 20  
||||\*|||||:\*|||||||  
Sbjct: 70 ACGACAACAATAACAACAAC 51  
>novel\_mir\_124 Score: 1.2 R03G\_07798  
Query: 1 TGCTCTTGTTGCTGTTGTTG 20  
||||\*|||||||:||  
Sbjct: 794 ACGACAACAACGACAACGAC 775  
>novel\_mir\_124 Score: 1.0 R03G\_07806  
Query: 1 TGCTCTTGTTGCTGTTGTTG 20  
||||\*|||||||  
Sbjct: 425 ACGACAACAACGACAACAAC 406  
>novel\_mir\_124 Score: 1.8 R03G\_07806  
Query: 1 TGCTCTTGTTGCTGTTGTTG 20  
||||\*:|||||||:||  
Sbjct: 392 ACGACGACAACGACAACGAC 373  
>novel\_mir\_124 Score: 2.5 R03G\_07916  
Query: 1 TGCTCTTGTTGCTGTTGTTG 20  
||\*:\*:|||||||  
Sbjct: 776 ACAACGACAACGACAACAAC 757  
>novel\_mir\_124 Score: 2.0 R03G\_07933  
Query: 1 TGCTCTTGTTGCTGTTGTTG 20  
||||\*|||||\*|||||||  
Sbjct: 425 ACGACAACAACAACAACAAC 406  
>novel\_mir\_124 Score: 2.2 R03G\_07933  
Query: 1 TGCTCTTGTTGCTGTTGTTG 20  
||\*:\*:|||||||:||  
Sbjct: 401 ACAACAACAACGACAACGAC 382  
>novel\_mir\_124 Score: 1.8 R03G\_07933  
Query: 1 TGCTCTTGTTGCTGTTGTTG 20  
||||\*:|||||||:||

Sbjct: 356 ACGACGACAACGACAACGAC 337  
>novel\_mir\_124 Score: 2.0 R03G\_07933  
Query: 1 TGCTCTTGTTGCTGTTGTTG 20  
||||\*|||||\*|||||

Sbjct: 335 ACGACAACAACAACAAC 316  
>novel\_mir\_124 Score: 1.2 R03G\_07939  
Query: 1 TGCTCTTGTTGCTGTTGTTG 20  
||||\*|||||:|

Sbjct: 1415 ACGACAACAACGACAACGAC 1396  
>novel\_mir\_124 Score: 2.5 R03G\_07939  
Query: 1 TGCTCTTGTTGCTGTTGTTG 20  
||\*|||||:|||||:||||\*

Sbjct: 179 ACAAGAACGACGACGACAAG 160  
>novel\_mir\_124 Score: 2.0 R03G\_07958  
Query: 1 TGCTCTTGTTGCTGTTGTTG 20  
||||\*|||:|||||:|

Sbjct: 1296 ACGACAACGACGACAACGGC 1277  
>novel\_mir\_124 Score: 2.2 R03G\_05532  
Query: 1 TGCTCTTGTTGCTGTTGTTG 20  
:|\*\*|||||

Sbjct: 98 GCTCGAACAACGACAACAAC 79  
>novel\_mir\_124 Score: 2.0 R03G\_05582  
Query: 1 TGCTCTTGTTGCTGTTGTTG 20  
||||\*||:|||||

Sbjct: 791 ACGACGACGACGACAACAAC 772  
>novel\_mir\_124 Score: 1.0 R03G\_05642  
Query: 1 TGCTCTTGTTGCTGTTGTTG 20  
||||\*|||||

Sbjct: 1271 ACGACAACAACGACAACAAC 1252  
>novel\_mir\_124 Score: 2.0 R03G\_05657  
Query: 1 TGCTCTTGTTGCTGTTGTTG 20  
\*||||\*||:|||||

Sbjct: 89 TCGACAACGACGACAACAAC 70  
>novel\_mir\_124 Score: 2.5 R03G\_05657  
Query: 1 TGCTCTTGTTGCTGTTGTTG 20  
||||\*|||||\*||:|||||

Sbjct: 68 ACGACAACAACAACGACAAC 49  
>novel\_mir\_124 Score: 2.0 R03G\_05730  
Query: 1 TGCTCTTGTTGCTGTTGTTG 20  
||||\*||:|||||:|||||

Sbjct: 676 ACGACAGCAACGACGACAAC 657  
>novel\_mir\_124 Score: 2.2 R03G\_05806  
Query: 1 TGCTCTTGTTGCTGTTGTTG 20  
:|||||:|:|||||:|||||:

Sbjct: 3943 GCGAGAGCGACGACGACAGT 3924

>novel\_mir\_124 Score: 1.2 R03G\_05906  
Query: 1 TGCTCTTGTTGCTGTTGTTG 20  
||||\*|||||||:|  
Sbjct: 305 ACGACAACAACGACAACGAC 286  
>novel\_mir\_124 Score: 0.0 R03G\_05910  
Query: 1 TGCTCTTGTTGCTGTTGTTG 20  
|||||||  
Sbjct: 338 ACGAGAACAACGACAACAAC 319  
>novel\_mir\_124 Score: 0.0 R03G\_05955  
Query: 1 TGCTCTTGTTGCTGTTGTTG 20  
|||||||  
Sbjct: 338 ACGAGAACAACGACAACAAC 319  
>novel\_mir\_124 Score: 1.8 R03G\_06121  
Query: 1 TGCTCTTGTTGCTGTTGTTG 20  
||||\*|||:|||||||:|  
Sbjct: 740 ACGACAACGACGACAACGAC 721  
>novel\_mir\_124 Score: 1.8 R03G\_06121  
Query: 1 TGCTCTTGTTGCTGTTGTTG 20  
||||\*|||||||:|  
Sbjct: 707 ACGAAAACAACGACAACGGT 688  
>novel\_mir\_124 Score: 2.0 R03G\_06147  
Query: 1 TGCTCTTGTTGCTGTTGTTG 20  
||||\*|||||\*|||||||  
Sbjct: 866 ACGACAACAACAACAACAAC 847  
>novel\_mir\_124 Score: 2.5 R03G\_06225  
Query: 1 TGCTCTTGTTGCTGTTGTTG 20  
||\*|||:|||||||  
Sbjct: 4625 ACAACAACGACGACAACAAC 4606  
>novel\_mir\_124 Score: 2.5 R03G\_06238  
Query: 1 TGCTCTTGTTGCTGTTGTTG 20  
||||\*|||:|||||:|||||  
Sbjct: 749 ACGACGACGACGACGACAAC 730  
>novel\_mir\_124 Score: 2.0 R03G\_06266  
Query: 1 TGCTCTTGTTGCTGTTGTTG 20  
|||||||\*||:||\*||  
Sbjct: 140 ACGAGAACAACAACGACTAC 121  
>novel\_mir\_124 Score: 2.5 R03G\_06268  
Query: 1 TGCTCTTGTTGCTGTTGTTG 20  
||||\*|||:\*|||||||  
Sbjct: 736 ACGACAACGCCGACAACAAC 717  
>novel\_mir\_124 Score: 2.5 R03G\_06268  
Query: 1 TGCTCTTGTTGCTGTTGTTG 20  
||||\*|||:\*|||||||  
Sbjct: 709 ACGACAACGCCGACAACAAC 690  
>novel\_mir\_124 Score: 2.5 R03G\_06268

Query: 1 TGCTCTTGTTGCTGTTGTTG 20  
||||\*|||||\*||:|||||  
Sbjct: 667 ACGACAACAACAACGACAAC 648  
>novel\_mir\_124 Score: 2.0 R03G\_06268  
Query: 1 TGCTCTTGTTGCTGTTGTTG 20  
||||\*|||:|||||:|||||  
Sbjct: 622 ACGACAACGACGACGACAAC 603  
>novel\_mir\_124 Score: 2.5 R03G\_06452  
Query: 1 TGCTCTTGTTGCTGTTGTTG 20  
||\*|\*|||:|||||  
Sbjct: 1688 ACAACAACGACGACAACAAC 1669  
>novel\_mir\_124 Score: 2.5 R03G\_06473  
Query: 1 TGCTCTTGTTGCTGTTGTTG 20  
||\*|\*:|||||  
Sbjct: 2618 ACAACGACAACGACAACAAC 2599  
>novel\_mir\_124 Score: 2.0 R03G\_06473  
Query: 1 TGCTCTTGTTGCTGTTGTTG 20  
||||\*|||||\*|||||  
Sbjct: 1061 ACGACAACAACAACAACAAC 1042  
>novel\_mir\_124 Score: 2.0 R03G\_06473  
Query: 1 TGCTCTTGTTGCTGTTGTTG 20  
||||\*|||||\*|||||  
Sbjct: 1025 ACGACAACAACAACAACAAC 1006  
>novel\_mir\_124 Score: 2.5 R03G\_06483  
Query: 1 TGCTCTTGTTGCTGTTGTTG 20  
||||\*|||||\*|:||||  
Sbjct: 613 ACGATAACAACGAAAGCAAC 594  
>novel\_mir\_124 Score: 1.0 R03G\_06550  
Query: 1 TGCTCTTGTTGCTGTTGTTG 20  
||||\*|||||  
Sbjct: 1379 ACGACAACAACGACAACAAC 1360  
>novel\_mir\_124 Score: 2.5 R03G\_06599  
Query: 1 TGCTCTTGTTGCTGTTGTTG 20  
||||\*:||:|||||\*||  
Sbjct: 398 ACGACGACGACGACAACACTAC 379  
>novel\_mir\_124 Score: 2.2 R03G\_06612  
Query: 1 TGCTCTTGTTGCTGTTGTTG 20  
||||:||:|||||\*||:|  
Sbjct: 1422 ACGAGGACGACGACACCAGC 1403  
>novel\_mir\_124 Score: 2.0 R03G\_06631  
Query: 1 TGCTCTTGTTGCTGTTGTTG 20  
||\*|\*|||||  
Sbjct: 3017 ACAACAACAACGACAACAAC 2998  
>novel\_mir\_124 Score: 2.2 R03G\_06631  
Query: 1 TGCTCTTGTTGCTGTTGTTG 20

||||\*:||:|||||||:||  
Sbjct: 2975 ACGACGACGACGACAACGAC 2956  
>novel\_mir\_124 Score: 1.5 R03G\_06665  
Query: 1 TGCTCTTGTTGCTGTTGTTG 20  
||||\*:|||||||  
Sbjct: 737 ACGACGACAACGACAACAAC 718  
>novel\_mir\_124 Score: 1.5 R03G\_04228  
Query: 1 TGCTCTTGTTGCTGTTGTTG 20  
||||\*:|||||||  
Sbjct: 434 ACGACGACAACGACAACAAC 415  
>novel\_mir\_124 Score: 2.2 R03G\_04228  
Query: 1 TGCTCTTGTTGCTGTTGTTG 20  
||\*||\*|||||||:||  
Sbjct: 215 ACAACAACAACGACAACGAC 196  
>novel\_mir\_124 Score: 2.0 R03G\_04258  
Query: 1 TGCTCTTGTTGCTGTTGTTG 20  
|\*||\*|||||||  
Sbjct: 1773 AAGATAACAACGACAACAAC 1754  
>novel\_mir\_124 Score: 2.5 R03G\_04261  
Query: 1 TGCTCTTGTTGCTGTTGTTG 20  
\*||\*||\*|||||||  
Sbjct: 587 CCAAGACCAACGACAACAAC 568  
>novel\_mir\_124 Score: 2.2 R03G\_04305  
Query: 1 TGCTCTTGTTGCTGTTGTTG 20  
||||\*|||||\*|||||:||  
Sbjct: 827 ACGACAACAACAACAACGAC 808  
>novel\_mir\_124 Score: 2.2 R03G\_04335  
Query: 1 TGCTCTTGTTGCTGTTGTTG 20  
||\*||||\*|||||||:  
Sbjct: 712 ACAAGAAGAACGACAACAAT 693  
>novel\_mir\_124 Score: 2.2 R03G\_04444  
Query: 1 TGCTCTTGTTGCTGTTGTTG 20  
||||\*:|||||||\*|||:  
Sbjct: 1139 ACGACGACAACGACAACACTAT 1120  
>novel\_mir\_124 Score: 1.0 R03G\_04522  
Query: 1 TGCTCTTGTTGCTGTTGTTG 20  
||||\*|||||||  
Sbjct: 1586 ACGACAACAACGACAACAAC 1567  
>novel\_mir\_124 Score: 2.0 R03G\_04522  
Query: 1 TGCTCTTGTTGCTGTTGTTG 20  
||||\*|||||\*|||||  
Sbjct: 1553 ACGACAACAACAACAACAAC 1534  
>novel\_mir\_124 Score: 1.8 R03G\_04562  
Query: 1 TGCTCTTGTTGCTGTTGTTG 20  
||||\*|||:|||||||:||

Sbjct: 2216 ACGACAACGACGACAACGAC 2197  
>novel\_mir\_124 Score: 2.5 R03G\_04578  
Query: 1 TGCTCTTGTTGCTGTTGTTG 20  
|||:|||||:||\*|||\*  
Sbjct: 240 ACGGAACAATGACCACAAA 221  
>novel\_mir\_124 Score: 2.5 R03G\_04604  
Query: 1 TGCTCTTGTTGCTGTTGTTG 20  
||||\*:||:|||||:|||||  
Sbjct: 151 ACGACGACGACGACGACAAC 132  
>novel\_mir\_124 Score: 2.0 R03G\_04640  
Query: 1 TGCTCTTGTTGCTGTTGTTG 20  
||||\*|||||||:||||\*  
Sbjct: 308 ACGACAACAACGACGACAAG 289  
>novel\_mir\_124 Score: 2.2 R03G\_04831  
Query: 1 TGCTCTTGTTGCTGTTGTTG 20  
||||\*|||||||:|:|:|  
Sbjct: 1695 ACGACAACAACGATGACGAC 1676  
>novel\_mir\_124 Score: 2.0 R03G\_04845  
Query: 1 TGCTCTTGTTGCTGTTGTTG 20  
||||\*|||||\*|||||||  
Sbjct: 339 ACGACAACAACAACAACAAC 320  
>novel\_mir\_124 Score: 1.0 R03G\_04916  
Query: 1 TGCTCTTGTTGCTGTTGTTG 20  
||||\*|||||||  
Sbjct: 484 ACGACAACAACGACAACAAC 465  
>novel\_mir\_124 Score: 2.5 R03G\_04947  
Query: 1 TGCTCTTGTTGCTGTTGTTG 20  
||\*||||\*:|||||||  
Sbjct: 1082 ACAAGAAGGACGACAACAAC 1063  
>novel\_mir\_124 Score: 2.5 R03G\_05103  
Query: 1 TGCTCTTGTTGCTGTTGTTG 20  
||||\*|||||\*|:|||||  
Sbjct: 1031 ACGAAAACAACGTCGACAAC 1012  
>novel\_mir\_124 Score: 2.5 R03G\_05142  
Query: 1 TGCTCTTGTTGCTGTTGT-TG 20  
|||||||:||\*|||\*||  
Sbjct: 5087 ACGAGAACGACGTCAACCTAC 5067  
>novel\_mir\_124 Score: 2.5 R03G\_05142  
Query: 1 TGCTCTTGTTGCTGTTGTTG 20  
||\*|\*|||||||  
Sbjct: 4643 ACAACAACAACGACAACAAG 4624  
>novel\_mir\_124 Score: 2.0 R03G\_05178  
Query: 1 TGCTCTTGTTGCTGTTGTTG 20  
||||\*|||\*|||||||  
Sbjct: 626 ACGACAACACTACGACAACAAC 607

>novel\_mir\_124 Score: 2.0 R03G\_05230  
Query: 1 TGCTCTTGTTGCTGTTGTTG 20  
||||\*|||||\*|||||  
Sbjct: 3557 ACGACAACAACAACAAC 3538

>novel\_mir\_124 Score: 2.0 R03G\_05308  
Query: 1 TGCTCTTGTTGCTGTTGTTG 20  
||||\*|||||\*|||||  
Sbjct: 2477 ACGACAACAACAACAAC 2458

>novel\_mir\_124 Score: 2.0 R03G\_05308  
Query: 1 TGCTCTTGTTGCTGTTGTTG 20  
||||\*|||||\*|||||  
Sbjct: 2450 ACGACAACAACAACAAC 2431

>novel\_mir\_124 Score: 1.8 R03G\_05347  
Query: 1 TGCTCTTGTTGCTGTTGTTG 20  
||||\*:|||||:|  
Sbjct: 368 ACGACGACAACGACAACGAC 349

>novel\_mir\_124 Score: 1.0 R03G\_05386  
Query: 1 TGCTCTTGTTGCTGTTGTTG 20  
||||\*|||||  
Sbjct: 998 ACGACAACAACGACAACAAC 979

>novel\_mir\_124 Score: 2.0 R03G\_05396  
Query: 1 TGCTCTTGTTGCTGTTGTTG 20  
||||\*|||:||||:||||  
Sbjct: 1592 ACGACAACGACGACGACAAC 1573

>novel\_mir\_124 Score: 1.5 R03G\_05396  
Query: 1 TGCTCTTGTTGCTGTTGTTG 20  
||||\*|||||  
Sbjct: 1361 ACGACGACAACGACAACAAC 1342

>novel\_mir\_124 Score: 2.2 R03G\_05396  
Query: 1 TGCTCTTGTTGCTGTTGTTG 20  
||||\*|||||\*||||:|  
Sbjct: 1334 ACGACAACAACAACAACGAC 1315

>novel\_mir\_124 Score: 1.5 R03G\_05396  
Query: 1 TGCTCTTGTTGCTGTTGTTG 20  
||||\*|||||  
Sbjct: 1301 ACGACGACAACGACAACAAC 1282

>novel\_mir\_124 Score: 1.8 R03G\_05396  
Query: 1 TGCTCTTGTTGCTGTTGTTG 20  
||\*:|||||:|  
Sbjct: 986 ACAGGAACAACGACAACGAC 967

>novel\_mir\_124 Score: 2.5 R03G\_05396  
Query: 1 TGCTCTTGTTGCTGTTGTTG 20  
||\*|\*:|||||  
Sbjct: 950 ACAACGACAACGACAACAAC 931

>novel\_mir\_124 Score: 2.0 R03G\_05403

Query: 1 TGCTCTTGTTGCTGTTGTTG 20  
||||\*|||||\*|||||||  
Sbjct: 1424 ACGACAACAACAACAAC 1405  
>novel\_mir\_124 Score: 0.0 R03G\_02231  
Query: 1 TGCTCTTGTTGCTGTTGTTG 20  
|||||||  
Sbjct: 338 ACGAGAACAACGACAACAAC 319  
>novel\_mir\_124 Score: 2.0 R03G\_02252  
Query: 1 TGCTCTTGTTGCTGTTGTTG 20  
||||\*|||||\*|||||||  
Sbjct: 338 ACGACAACAACAACAAC 319  
>novel\_mir\_124 Score: 2.2 R03G\_02307  
Query: 1 TGCTCTTGTTGCTGTTGTTG 20  
\*||||\*|||||||:|:|  
Sbjct: 356 CCGACAACAACGACGACGAC 337  
>novel\_mir\_124 Score: 2.0 R03G\_02434  
Query: 1 TGCTCTTGTTGCTGTTGTTG 20  
||||\*|||||\*|||||||  
Sbjct: 239 ACGACAACAACAACAAC 220  
>novel\_mir\_124 Score: 1.0 R03G\_02436  
Query: 1 TGCTCTTGTTGCTGTTGTTG 20  
||||\*|||||||  
Sbjct: 713 ACGACAACAACGACAACAAC 694  
>novel\_mir\_124 Score: 2.2 R03G\_02518  
Query: 1 TGCTCTTGTTGCTGTTGTTG 20  
||||\*:|:|||||||:|  
Sbjct: 536 ACGACGACGACGACAACGAC 517  
>novel\_mir\_124 Score: 2.0 R03G\_02527  
Query: 1 TGCTCTTGTTGCTGTTGTTG 20  
||\*|\*|||||||  
Sbjct: 998 ACAACAACAACGACAACAAC 979  
>novel\_mir\_124 Score: 2.0 R03G\_02527  
Query: 1 TGCTCTTGTTGCTGTTGTTG 20  
||\*|||||||\*|||||||  
Sbjct: 923 ACTAGAACAACAACAAC 904  
>novel\_mir\_124 Score: 2.5 R03G\_02623  
Query: 1 TGCTCTTGTTGCTGTTGTTG 20  
||\*|\*|||||||\*|  
Sbjct: 101 ACAACAACAACGACAACACC 82  
>novel\_mir\_124 Score: 2.5 R03G\_02632  
Query: 1 TGCTCTTGTTGCTGTTGTT-G 20  
|\*|||||||\*||||||\*|  
Sbjct: 29 AAGAGAACAACAACAAGC 9  
>novel\_mir\_124 Score: 2.5 R03G\_02642  
Query: 1 TGCTCTTGTTGCTGTTGTTG 20



\*|||\*|||\*|||||||  
Sbjct: 1031 TCGACAACCACGACAACAAC 1012  
>novel\_mir\_124 Score: 2.0 R03G\_02642  
Query: 1 TGCTCTTGTTGCTGTTGTTG 20  
|||\*|||:||||:||||  
Sbjct: 812 ACGACAACGACGACGACAAC 793  
>novel\_mir\_124 Score: 1.8 R03G\_02642  
Query: 1 TGCTCTTGTTGCTGTTGTTG 20  
|||\*|||:|||||||:|  
Sbjct: 485 ACGACAACGACGACAACGAC 466  
>novel\_mir\_124 Score: 2.0 R03G\_02772  
Query: 1 TGCTCTTGTTGCTGTTGTTG 20  
||||:||||\*||||\*  
Sbjct: 1596 ACGAGGACAACAACAACAAA 1577  
>novel\_mir\_124 Score: 0.5 R03G\_02782  
Query: 1 TGCTCTTGTTGCTGTTGTTG 20  
|||||||:|||||||  
Sbjct: 494 ACGAGAACGACGACAACAAC 475  
>novel\_mir\_124 Score: 1.8 R03G\_02817  
Query: 1 TGCTCTTGTTGCTGTTGTTG 20  
|||\*:|||||||:|  
Sbjct: 377 ACGACGACAACGACAACGAC 358  
>novel\_mir\_124 Score: 0.0 R03G\_02827  
Query: 1 TGCTCTTGTTGCTGTTGTTG 20  
|||||||  
Sbjct: 338 ACGAGAACAACGACAACAAC 319  
>novel\_mir\_124 Score: 1.5 R03G\_03075  
Query: 1 TGCTCTTGTTGCTGTTGTTG 20  
|||\*:|||||||  
Sbjct: 1775 ACGACGACAACGACAACAAC 1756  
>novel\_mir\_124 Score: 2.5 R03G\_03202  
Query: 1 TGCTCTTGTTGCTGTTGTTG 20  
|\*||||||\*|:||||  
Sbjct: 895 AAGAGAACAACAATAACAAC 876  
>novel\_mir\_124 Score: 2.0 R03G\_03203  
Query: 1 TGCTCTTGTTGCTGTTGTTG 20  
|||\*||||||\*|||  
Sbjct: 275 ACGACAACAACGACTACAAC 256  
>novel\_mir\_124 Score: 1.5 R03G\_03212  
Query: 1 TGCTCTTGTTGCTGTTGTTG 20  
|||\*:|||||||  
Sbjct: 227 ACGACGACAACGACAACAAC 208  
>novel\_mir\_124 Score: 2.0 R03G\_03212  
Query: 1 TGCTCTTGTTGCTGTTGTTG 20  
|||\*:||:|||||||

Sbjct: 173 ACGACGACGACGACAACAAC 154  
>novel\_mir\_124 Score: 2.5 R03G\_03221  
Query: 1 TGCTCTTGTTGCTGTTGTTG 20  
||\*:|||||||||||||\*\*|

Sbjct: 2588 ACAGGAACAACGACAAC-TC 2570  
>novel\_mir\_124 Score: 1.0 R03G\_03477  
Query: 1 TGCTCTTGTTGCTGTTGTTG 20  
||||\*|||||||||||||

Sbjct: 1130 ACGACAACAACGACAACAAC 1111  
>novel\_mir\_124 Score: 2.0 R03G\_03477  
Query: 1 TGCTCTTGTTGCTGTTGTTG 20  
||||\*|||||\*|||||

Sbjct: 296 ACGACAACAACAACAACAAC 277  
>novel\_mir\_124 Score: 2.2 R03G\_03495  
Query: 1 TGCTCTTGTTGCTGTTGTTG 20  
|||||||:|||||:|\*||:

Sbjct: 39 ACGAGAACGACGACGA-AAT 21  
>novel\_mir\_124 Score: 2.0 R03G\_03525  
Query: 1 TGCTCTTGTTGCTGTTGTTG 20  
||||\*|||||\*|||||

Sbjct: 353 ACGACAACAACAACAACAAC 334  
>novel\_mir\_124 Score: 2.5 R03G\_03548  
Query: 1 TGCTCTTGTTGCTGTTGTTG 20  
||\*||||\*:|||||

Sbjct: 901 ACAAGAAGGACGACAACAAC 882  
>novel\_mir\_124 Score: 2.0 R03G\_03548  
Query: 1 TGCTCTTGTTGCTGTTGTTG 20  
\*:||\*|||||||||

Sbjct: 844 TTGACAACAACGACAACAAC 825  
>novel\_mir\_124 Score: 1.8 R03G\_03713  
Query: 1 TGCTCTTGTTGCTGTTGTTG 20  
||||\*|||||||:||:|

Sbjct: 396 ACGACAACAACGACGACGAC 377  
>novel\_mir\_124 Score: 2.5 R03G\_03818  
Query: 1 TGCTCTTGTTGCTGTTGTTG 20  
||\*|||:|||||

Sbjct: 1685 ACAACAACGACGACAACAAC 1666  
>novel\_mir\_124 Score: 1.8 R03G\_03857  
Query: 1 TGCTCTTGTTGCTGTTGTTG 20  
:||\*|||:|||||

Sbjct: 470 GCGTGAACGACGACAACAAC 451  
>novel\_mir\_124 Score: 1.2 R03G\_03857  
Query: 1 TGCTCTTGTTGCTGTTGTTG 20  
||||\*|||||||:|

Sbjct: 428 ACGACAACAACGACAACGAC 409

>novel\_mir\_124 Score: 1.8 R03G\_03907  
Query: 1 TGCTCTTGTTGCTGTTGTTG 20  
||||\*||:|||||||:||  
Sbjct: 204 ACGACAATAACGACAACGAC 185  
>novel\_mir\_124 Score: 2.2 R03G\_03977  
Query: 1 TGCTCTTGTTGCTGTTGTTG 20  
|||||:|||||\*|||||:|\*  
Sbjct: 713 ACGAGGACAACAACAACGAG 694  
>novel\_mir\_124 Score: 2.5 R03G\_04003  
Query: 1 TGCTCTTGTTGCTGTTGTTG 20  
\*|||\*|||:|||||:|||||  
Sbjct: 1103 TCGAAAACGACGACGACAAC 1084  
>novel\_mir\_124 Score: 2.0 R03G\_04003  
Query: 1 TGCTCTTGTTGCTGTTGTTG 20  
||||\*|||\*|||||||  
Sbjct: 1046 ACGACAACCACGACAACAAC 1027  
>novel\_mir\_124 Score: 2.5 R03G\_04037  
Query: 1 TGCTCTTGTTGCTGTTGTTG 20  
||||\*:|||||\*|||||||  
Sbjct: 737 ACGACGACAACAACAACAAC 718  
>novel\_mir\_124 Score: 1.2 R03G\_00007  
Query: 1 TGCTCTTGTTGCTGTTGTTG 20  
||||\*|||||||:||  
Sbjct: 653 ACGACAACAACGACAACGAC 634  
>novel\_mir\_124 Score: 2.0 R03G\_00028  
Query: 1 TGCTCTTGTTGCTGTTGTTG 20  
||||\*|||||\*|||||||  
Sbjct: 380 ACGACAACAACAACAACAAC 361  
>novel\_mir\_124 Score: 2.5 R03G\_00053  
Query: 1 TGCTCTTGTTGCTGTTGTTG 20  
||||\*|||||\*|||||||\*  
Sbjct: 3800 ACGACAACAACCACAACAAA 3781  
>novel\_mir\_124 Score: 2.0 R03G\_00056  
Query: 1 TGCTCTTGTTGCTGTTGTTG 20  
||\*|\*|||||||  
Sbjct: 1538 ACAACAACAACGACAACAAC 1519  
>novel\_mir\_124 Score: 1.5 R03G\_00162  
Query: 1 TGCTCTTGTTGCTGTTGTTG 20  
||||\*|||:|||||||  
Sbjct: 26 ACGACAACGACGACAACAAC 7  
>novel\_mir\_124 Score: 2.0 R03G\_00171  
Query: 1 TGCTCTTGTTGCTGTTGTTG 20  
||\*|\*|||||||  
Sbjct: 733 ACAACAACAACGACAACAAC 714  
>novel\_mir\_124 Score: 1.8 R03G\_00219

Query: 1 TGCTCTTGTTGCTGTTGTTG 20  
||||\*|||||||:|:|  
Sbjct: 1982 ACGACAACAACGACGACGAC 1963  
>novel\_mir\_124 Score: 0.0 R03G\_00259  
Query: 1 TGCTCTTGTTGCTGTTGTTG 20  
|||||||  
Sbjct: 338 ACGAGAACAACGACAACAAC 319  
>novel\_mir\_124 Score: 1.5 R03G\_00271  
Query: 1 TGCTCTTGTTGCTGTTGTTG 20  
||||\*|||||||:||||  
Sbjct: 513 ACGACAACAACGACAGCAAC 494  
>novel\_mir\_124 Score: 1.0 R03G\_00357  
Query: 1 TGCTCTTGTTGCTGTTGTTG 20  
||||\*|||||||  
Sbjct: 386 ACGACAACAACGACAACAAC 367  
>novel\_mir\_124 Score: 2.2 R03G\_00357  
Query: 1 TGCTCTTGTTGCTGTTGTTG 20  
||||\*||:|||||||:|  
Sbjct: 350 ACGACGACGACGACAACGAC 331  
>novel\_mir\_124 Score: 2.0 R03G\_00501  
Query: 1 TGCTCTTGTTGCTGTTGTTG 20  
||||\*||:|||||||  
Sbjct: 119 ACGACGACGACGACAACAAC 100  
>novel\_mir\_124 Score: 2.5 R03G\_00535  
Query: 1 TGCTCTTGTTGCTGTTGTTG 20  
||||\*||:|:|||||||\*  
Sbjct: 52 ACGACAATAGCGACAACAAA 33  
>novel\_mir\_124 Score: 1.8 R03G\_00544  
Query: 1 TGCTCTTGTTGCTGTTGTTG 20  
||||\*||:|||||||:|  
Sbjct: 2210 ACGACGACAACGACAACGAC 2191  
>novel\_mir\_124 Score: 2.0 R03G\_00544  
Query: 1 TGCTCTTGTTGCTGTTGTTG 20  
||||\*|||:|||||:||||  
Sbjct: 1385 ACGACAACGACGACGACAAC 1366  
>novel\_mir\_124 Score: 2.2 R03G\_00547  
Query: 1 TGCTCTTGTTGCTGTTGTTG 20  
:|||||||:|||||||\*|::  
Sbjct: 1856 GCGAGAACGACGACAA-AGT 1838  
>novel\_mir\_124 Score: 1.8 R03G\_00600  
Query: 1 TGCTCTTGTTGCTGTTGTTG 20  
||||\*||:|||||||:|  
Sbjct: 278 ACGACGACAACGACAACGAC 259  
>novel\_mir\_124 Score: 2.5 R03G\_00640  
Query: 1 TGCTCTTGTTGCTGTTGTTG 20

||||\*|||\*|||||||\*||  
Sbjct: 1931 ACGACAACACTACGACAACACTAC 1912  
>novel\_mir\_124 Score: 2.2 R03G\_00640  
Query: 1 TGCTCTTGTTGCTGTTGTTG 20  
||||\*|||:|||||:||:||  
Sbjct: 1349 ACGACAACGACGACGACGAC 1330  
>novel\_mir\_124 Score: 2.2 R03G\_00640  
Query: 1 TGCTCTTGTTGCTGTTGT-TG 20  
||||\*:|||||||\*|||  
Sbjct: 872 ACGACGACAACGACAACGTAC 852  
>novel\_mir\_124 Score: 2.0 R03G\_00729  
Query: 1 TGCTCTTGTTGCTGTTGTTG 20  
||||\*|||||\*|||||||  
Sbjct: 947 ACGACAACAACAACAACAAC 928  
>novel\_mir\_124 Score: 1.5 R03G\_00766  
Query: 1 TGCTCTTGTTGCTGTTGTTG 20  
||||\*|||:|||||||  
Sbjct: 1397 ACGACAACGACGACAACAAC 1378  
>novel\_mir\_124 Score: 2.5 R03G\_00853  
Query: 1 TGCTCTTGTTGCTGTTGTTG 20  
||||\*|||||\*|||||\*||  
Sbjct: 1121 ACGACAACAACAACAACACTAC 1102  
>novel\_mir\_124 Score: 2.5 R03G\_00934  
Query: 1 TGCTCTTGTTGCTGTTGTTG 20  
\*|||\*|||||||\*|||||||  
Sbjct: 422 CCGACAACAACGCCAACAAC 403  
>novel\_mir\_124 Score: 2.0 R03G\_00934  
Query: 1 TGCTCTTGTTGCTGTTGTTG 20  
||\*|\*|||||||  
Sbjct: 323 ACAACAACAACGACAACAAC 304  
>novel\_mir\_124 Score: 2.0 R03G\_00934  
Query: 1 TGCTCTTGTTGCTGTTGTTG 20  
||||\*|||:|||||:|||||  
Sbjct: 299 ACGACAACGACGACGACAAC 280  
>novel\_mir\_124 Score: 2.0 R03G\_00949  
Query: 1 TGCTCTTGTTGCTGTTGTTG 20  
||||\*|||||\*|||||||  
Sbjct: 1208 ACGACAACAACAACAACAAC 1189  
>novel\_mir\_124 Score: 1.5 R03G\_00949  
Query: 1 TGCTCTTGTTGCTGTTGTTG 20  
||||\*:|||||||  
Sbjct: 1160 ACGACGACAACGACAACAAC 1141  
>novel\_mir\_124 Score: 2.5 R03G\_00949  
Query: 1 TGCTCTTGTTGCTGTTGTTG 20  
||||\*|||||\*|||||\*|

Sbjct: 92 ACGACAACAACAACACC 73  
>novel\_mir\_124 Score: 2.5 R03G\_00960  
Query: 1 TGCTCTTGTTGCTGTTGTTG 20  
|||||||:||||:\*||\*

Sbjct: 33 ACGAGAACAATGACAG-AAG 15  
>novel\_mir\_124 Score: 2.0 R03G\_01092  
Query: 1 TGCTCTTGTTGCTGTTGTTG 20  
||||\*|||||\*|||||||

Sbjct: 533 ACGACAACAACAACAAC 514  
>novel\_mir\_124 Score: 1.8 R03G\_01100  
Query: 1 TGCTCTTGTTGCTGTTGTTG 20  
||\*|||||||:|:|

Sbjct: 695 ACTAGAACAACGACAGCGAC 676  
>novel\_mir\_124 Score: 2.0 R03G\_01102  
Query: 1 TGCTCTTGTTGCTGTTGTTG 20  
||||\*||:|||||||

Sbjct: 1397 ACGACGACGACGACAACAAC 1378  
>novel\_mir\_124 Score: 2.5 R03G\_01107  
Query: 1 TGCTCTTGTTGCTGTTGTTG 20  
\*|\*|||||||\*|||||||

Sbjct: 266 CCTAGAACAACAACAAC 247  
>novel\_mir\_124 Score: 1.8 R03G\_01192  
Query: 1 TGCTCTTGTTGCTGTTGTTG 20  
||||\*||:|||||||

Sbjct: 305 ACGACGACAACGACAACGAC 286  
>novel\_mir\_124 Score: 0.0 R03G\_01198  
Query: 1 TGCTCTTGTTGCTGTTGTTG 20  
|||||||

Sbjct: 338 ACGAGAACAACGACAACAAC 319  
>novel\_mir\_124 Score: 2.0 R03G\_01238  
Query: 1 TGCTCTTGTTGCTGTTGTTG 20  
||\*|\*|||||||

Sbjct: 854 ACTACAACAACGACAACAAC 835  
>novel\_mir\_124 Score: 2.0 R03G\_01247  
Query: 1 TGCTCTTGTTGCTGTTGTTG 20  
||\*|\*|||||||

Sbjct: 854 ACTACAACAACGACAACAAC 835  
>novel\_mir\_124 Score: 2.0 R03G\_01350  
Query: 1 TGCTCTTGTTGCTGTTGTTG 20  
||\*|\*|||||||

Sbjct: 719 ACAACAACAACGACAACAAC 700  
>novel\_mir\_124 Score: 2.0 R03G\_01351  
Query: 1 TGCTCTTGTTGCTGTTGTTG 20  
||\*|\*|||||||

Sbjct: 752 ACAACAACAACGACAACAAC 733

>novel\_mir\_124 Score: 2.0 R03G\_01361  
Query: 1 TGCTCTTGTTGCTGTTGTTG 20  
||||\*:||:|||||||  
Sbjct: 476 ACGACGACGACGACAACAAC 457  
>novel\_mir\_124 Score: 1.0 R03G\_01361  
Query: 1 TGCTCTTGTTGCTGTTGTTG 20  
||||\*|||||||  
Sbjct: 446 ACGACAACAACGACAACAAC 427  
>novel\_mir\_124 Score: 2.0 R03G\_01361  
Query: 1 TGCTCTTGTTGCTGTTGTTG 20  
||\*|\*|||||||  
Sbjct: 404 ACAACAACAACGACAACAAC 385  
>novel\_mir\_124 Score: 2.5 R03G\_01361  
Query: 1 TGCTCTTGTTGCTGTTGTTG 20  
\*||||\*:||:|||||||  
Sbjct: 380 CCGACGACGACGACAACAAC 361  
>novel\_mir\_124 Score: 2.5 R03G\_01374  
Query: 1 TGCTCTTGTTGCTGTTGTTG 20  
|:||\*|||||\*|||||  
Sbjct: 398 ATGACAACAACAACAACAAC 379  
>novel\_mir\_124 Score: 2.5 R03G\_01415  
Query: 1 TGCTCTTGTTGCTGTTGTTG 20  
\*:||||\*|||||||\*  
Sbjct: 49 TTGAGCACAACGACAACAAA 30  
>novel\_mir\_124 Score: 1.8 R03G\_01453  
Query: 1 TGCTCTTGTTGCTGTTGTTG 20  
|||||||\*||\*|:  
Sbjct: 480 ACGAGAACAACGACTACCAT 461  
>novel\_mir\_124 Score: 2.5 R03G\_01458  
Query: 1 TGCTCTTGTTGCTGTTGTTG 20  
||||\*:||:|||||||\*||  
Sbjct: 470 ACGACGACGACGACAACACTAC 451  
>novel\_mir\_124 Score: 1.8 R03G\_01458  
Query: 1 TGCTCTTGTTGCTGTTGTTG 20  
||||\*|||:|||||||:  
Sbjct: 184 ACGATAACGACGACAACAAT 165  
>novel\_mir\_124 Score: 2.0 R03G\_01472  
Query: 1 TGCTCTTGTTGCTGTTGTTG 20  
||||\*|||:|||||:|||||  
Sbjct: 1211 ACGACAACGACGACGACAAC 1192  
>novel\_mir\_124 Score: 2.0 R03G\_01552  
Query: 1 TGCTCTTGTTGCTGTTGTTG 20  
||||\*|||||\*|||||  
Sbjct: 161 ACGACAACAACAACAACAAC 142  
>novel\_mir\_124 Score: 1.2 R03G\_01671

Query: 1 TGCTCTTGTTGCTGTTGTTG 20  
||||\*|||||||:|  
Sbjct: 368 ACGACAACAACGACAACGAC 349  
>novel\_mir\_124 Score: 1.8 R03G\_01717  
Query: 1 TGCTCTTGTTGCTGTTGTTG 20  
||||\*|||||||:|  
Sbjct: 371 ACGACGACAACGACAACGAC 352  
>novel\_mir\_124 Score: 2.0 R03G\_01791  
Query: 1 TGCTCTTGTTGCTGTTGTTG 20  
||||\*|||||\*|||||||  
Sbjct: 177 ACGACAACAACAACAACAAC 158  
>novel\_mir\_124 Score: 1.5 R03G\_01793  
Query: 1 TGCTCTTGTTGCTGTTGTTG 20  
||||\*|||:|||||||  
Sbjct: 434 ACGACAACGACGACAACAAC 415  
>novel\_mir\_124 Score: 2.5 R03G\_01793  
Query: 1 TGCTCTTGTTGCTGTTGTTG 20  
||\*|\*|||||||:|||||  
Sbjct: 386 ACAACAACAACGACGACAAC 367  
>novel\_mir\_124 Score: 2.5 R03G\_01899  
Query: 1 TGCTCTTGTTGCTGTTGTTG 20  
||\*:\*|||||||:|||||  
Sbjct: 335 ACAGCAACAACGACAACAAC 316  
>novel\_mir\_124 Score: 1.8 R03G\_01899  
Query: 1 TGCTCTTGTTGCTGTTGTTG 20  
||||\*|||:|||||||:|  
Sbjct: 299 ACGACAACGACGACAACGAC 280  
>novel\_mir\_124 Score: 1.5 R03G\_01899  
Query: 1 TGCTCTTGTTGCTGTTGTTG 20  
||||\*|||||||:|||||  
Sbjct: 119 ACGACGACAACGACAACAAC 100  
>novel\_mir\_124 Score: 2.5 R03G\_01899  
Query: 1 TGCTCTTGTTGCTGTTGTTG 20  
||||\*||:|||||:|||||  
Sbjct: 89 ACGACGACGACGACGACAAC 70  
>novel\_mir\_124 Score: 1.2 R03G\_01909  
Query: 1 TGCTCTTGTTGCTGTTGTTG 20  
|||||||:|||:||||:|  
Sbjct: 521 ACGAGAACGACGGCAACGAC 502  
>novel\_mir\_124 Score: 2.5 R03G\_01975  
Query: 1 TGCTCTTGTTGCTGTTGTTG 20  
\*\*|||||\*|||||||  
Sbjct: 50 CGGAGAACCACGACAACAAC 31  
>novel\_mir\_124 Score: 1.8 R03G\_01976  
Query: 1 TGCTCTTGTTGCTGTTGTTG 20



||||\*|||||||:||||:|  
Sbjct: 731 ACGACAACAACGGCAACGAC 712  
>novel\_mir\_124 Score: 1.0 R03G\_01976  
Query: 1 TGCTCTTGTTGCTGTTGTTG 20  
||||\*|||||||  
Sbjct: 704 ACGACAACAACGACAACAAC 685  
>novel\_mir\_124 Score: 1.5 R03G\_02019  
Query: 1 TGCTCTTGTTGCTGTTGTTG 20  
||||\*|||||||:|||||||  
Sbjct: 700 ACGACAACAACGGCAACAAC 681  
>novel\_mir\_124 Score: 1.2 R03G\_02027  
Query: 1 TGCTCTTGTTGCTGTTGTTG 20  
||||\*|||||||:|||||||  
Sbjct: 635 ACGACAACAACGACAACGAC 616  
>novel\_mir\_124 Score: 1.8 R03G\_02027  
Query: 1 TGCTCTTGTTGCTGTTGTTG 20  
||||\*|||||||:|\*  
Sbjct: 605 ACGACAACAACGACAACGAA 586  
>novel\_mir\_124 Score: 2.5 R03G\_02028  
Query: 1 TGCTCTTGTTGCTGTTGTTG 20  
||||\*:|||||||\*::  
Sbjct: 206 ACGACGACAACGACAAC-GT 188  
>novel\_mir\_124 Score: 2.2 R03G\_02048  
Query: 1 TGCTCTTGTTGCTGTTGTTG 20  
::\*|||||||\*  
Sbjct: 752 GTTAGAACAACGACAACAAA 733  
>novel\_mir\_124 Score: 2.2 R03G\_02100  
Query: 1 TGCTCTTGTTGCTGTTGTTG 20  
||||\*:|||||||:||:|  
Sbjct: 473 ACGACGACAACGACGACGAC 454  
>novel\_mir\_124 Score: 1.2 R03G\_02100  
Query: 1 TGCTCTTGTTGCTGTTGTTG 20  
||||\*|||||||:|  
Sbjct: 95 ACGACAACAACGACAACGAC 76  
>novel\_mir\_124 Score: 2.2 R03G\_02199  
Query: 1 TGCTCTTGTTGCTGTTGTTG 20  
|:|||||||:|\*  
Sbjct: 562 ATGAGAACAACGATGACGAA 543  
>novel\_mir\_124 Score: 2.2 R03G\_02209  
Query: 1 TGCTCTTGTTGCTGTTGTTG 20  
:|||\*|||||||\*|\*  
Sbjct: 2640 GCGACAACAACGACAACACTAG 2621  
>novel\_mir\_124 Score: 1.8 R03G\_17460  
Query: 1 TGCTCTTGTTGCTGTTGTTG 20  
||||\*:|||||||:|

Sbjct: 392 ACGACGACAACGACAACGAC 373  
>novel\_mir\_124 Score: 1.8 R03G\_17433  
Query: 1 TGCTCTTGTTGCTGTTGTTG 20  
||||\*:|||||||:|

Sbjct: 365 ACGACGACAACGACAACGAC 346  
>novel\_mir\_124 Score: 2.2 R03G\_17108  
Query: 1 TGCTCTTGTTGCTGTTGTTG 20  
||||\*:||:|||||||:|

Sbjct: 401 ACGACGACGACGACAACGAC 382  
>novel\_mir\_124 Score: 2.5 R03G\_16933  
Query: 1 TGCTCTTGTTGCTGTTGTTG 20  
|||||||:||\*||||\*|\*

Sbjct: 278 ACGAGAACGACAACAACCAG 259  
>novel\_mir\_124 Score: 1.2 R03G\_16959  
Query: 1 TGCTCTTGTTGCTGTTGTTG 20  
||||\*|||||||:|

Sbjct: 566 ACGACAACAACGACAACGAC 547  
>novel\_mir\_124 Score: 0.0 R03G\_16959  
Query: 1 TGCTCTTGTTGCTGTTGTTG 20  
|||||||

Sbjct: 425 ACGAGAACAACGACAACAAC 406  
>novel\_mir\_124 Score: 1.5 R03G\_16962  
Query: 1 TGCTCTTGTTGCTGTTGTTG 20  
||||\*:|||||||

Sbjct: 452 ACGACGACAACGACAACAAC 433  
>novel\_mir\_124 Score: 1.0 R03G\_16965  
Query: 1 TGCTCTTGTTGCTGTTGTTG 20  
|||||||\*|||||

Sbjct: 1190 ACGAGAACAACGAGAACAAC 1171  
>novel\_mir\_124 Score: 2.0 R03G\_16993  
Query: 1 TGCTCTTGTTGCTGTTGTTG 20  
||||\*|||:|

Sbjct: 1740 ACGACAACGGCGACAACAAC 1721  
>novel\_mir\_69 Score: 2.5 R03G\_13356  
Query: 1 TGATCCTAACATCGATGAAAGT 23  
|:||||\*|||||||\*||\*|

Sbjct: 490 ATTAGAATTTGTAGCTA-TTACA 469  
>novel\_mir\_90 Score: 1.2 R03G\_15229  
Query: 1 TAGTAGCCGCTCTATTTAAGG 21  
:||||\*|||||||

Sbjct: 325 GTCATCAGCGAGATAAATTCC 305  
>novel\_mir\_90 Score: 1.2 R03G\_13940  
Query: 1 TAGTAGCCGCTCTATTTAAGG 21  
:||||\*|||||||

Sbjct: 397 GTCATCAGCGAGATAAATTCC 377

>novel\_mir\_90 Score: 0.2 R03G\_10176  
Query: 1 TAGTAGCCGCTCTATTTAAGG 21  
:|||||  
Sbjct: 463 GTCATCGGCGAGATAAATTCC 443  
>novel\_mir\_90 Score: 0.5 R03G\_09103  
Query: 1 TAGTAGCCGCTCTATTTAAGG 21  
|||||:|||||  
Sbjct: 484 ATCATCGGCGGGATAAATTCC 464  
>novel\_mir\_90 Score: 2.5 R03G\_06770  
Query: 1 TAGTAGCCGCTCTATTTAAGG 21  
|||||\*|:|||:|||||:  
Sbjct: 553 ATCATCCGTGAGGTAAATTTT 533  
>novel\_mir\_90 Score: 1.8 R03G\_04446  
Query: 1 TAGTAGCCGCTCTATTTAAGG 21  
:|:|||\*|||||  
Sbjct: 361 GTTATCAGCGAGATAAATTCC 341  
>novel\_mir\_52 Score: 2.2 R03G\_16744  
Query: 1 TGGGGAAGGAGAAGGGGAGGA 21  
:|::|||||:|:|||||  
Sbjct: 1212 GCTTCTTCCTCTTTCTCTCCT 1192  
>novel\_mir\_52 Score: 2.5 R03G\_16683  
Query: 1 TGGGGAAGGAGAAGGGGAGGA 21  
\*|:|||||:|\*|||  
Sbjct: 183 TTCTCTTCCTCTTCCTC-CCT 164  
>novel\_mir\_52 Score: 2.2 R03G\_16686  
Query: 1 TGGGGAAGGAGAAGGGGAGGA 21  
:|::|||||:|:|||||  
Sbjct: 1212 GCTTCTTCCTCTTTCTCTCCT 1192  
>novel\_mir\_52 Score: 2.2 R03G\_15990  
Query: 1 TGGGGAAGGAGAAGGGGAGGA 21  
\*||:|||||:||:\*|  
Sbjct: 1212 TCCTCTTCCTCTTCCTCTTGT 1192  
>novel\_mir\_52 Score: 2.2 R03G\_15869  
Query: 1 TGGGGAAGGAGAAGGGGAGGA 21  
:|::|||||:|:|||||  
Sbjct: 1212 GCTTCTTCCTCTTTCTCTCCT 1192  
>novel\_mir\_52 Score: 2.2 R03G\_14448  
Query: 1 TGGGGAAGGAGAAGGGGAGGA 21  
\*|:|||||:||:|  
Sbjct: 552 TTCTCTTCCTCTTCCTCTTCT 532  
>novel\_mir\_52 Score: 2.2 R03G\_14704  
Query: 1 TGGGGAAGGAGAAGGGGAGGA 21  
:|::|||||:|:|||||  
Sbjct: 1212 GCTTCTTCCTCTTTCTCTCCT 1192  
>novel\_mir\_52 Score: 2.0 R03G\_13996



:|:|:|||||:|:|||||  
Sbjct: 1212 GCTTCTTCCTCTTTCTCTCCT 1192  
>novel\_mir\_52 Score: 2.2 R03G\_10555  
Query: 1 TGGGGAAGGAGAAGGGGAGGA 21  
:|:|:|||||:|:|||||  
Sbjct: 1212 GCTTCTTCCTCTTTCTCTCCT 1192  
>novel\_mir\_52 Score: 2.2 R03G\_10560  
Query: 1 TGGGGAAGGAGAAGGGGAGGA 21  
:|:|:|||||:|:|||||  
Sbjct: 1212 GCTTCTTCCTCTTTCTCTCCT 1192  
>novel\_mir\_52 Score: 2.2 R03G\_09376  
Query: 1 TGGGGAAGGAGAAGGGGAGGA 21  
:|:|:|||||:|:|||||  
Sbjct: 1212 GCTTCTTCCTCTTTCTCTCCT 1192  
>novel\_mir\_52 Score: 2.5 R03G\_10142  
Query: 1 TGGGGAAGGAGAAGGGGAGGA 21  
|||:|||||\*||:||||\*|  
Sbjct: 2851 ACCTCTTCCTGTTTCCCTCAT 2831  
>novel\_mir\_52 Score: 2.5 R03G\_08059  
Query: 1 TGGGGAAGGAGAAGGGGAGGA 21  
|||:|||||\*||:||||\*|  
Sbjct: 400 ACCTCTTCCTGTTTCCCTCAT 380  
>novel\_mir\_52 Score: 2.2 R03G\_08612  
Query: 1 TGGGGAAGGAGAAGGGGAGGA 21  
:|:|:|||||:|:|||||  
Sbjct: 1212 GCTTCTTCCTCTTTCTCTCCT 1192  
>novel\_mir\_52 Score: 2.0 R03G\_07279  
Query: 1 TGGGGAAGGAGAAGGGGAGGA 21  
||:||||:||||\*|||||  
Sbjct: 3594 ACTCCTTCTTCTTCGCCTCCT 3574  
>novel\_mir\_52 Score: 2.2 R03G\_07305  
Query: 1 TGGGGAAGGAGAAGGGGAGGA 21  
:|:|:|||||:|:|||||  
Sbjct: 1212 GCTTCTTCCTCTTTCTCTCCT 1192  
>novel\_mir\_52 Score: 1.8 R03G\_05630  
Query: 1 TGGGGAAGGAGAAGGGGAGGA 21  
:|:|:|||||:|:|||||  
Sbjct: 1212 GCTTCTTCCTCTTCCTCTCCT 1192  
>novel\_mir\_52 Score: 2.2 R03G\_06378  
Query: 1 TGGGGAAGGAGAAGGGGAGGA 21  
||:|:|||:||||:||:|  
Sbjct: 693 ACTCTTTCTTCTTCCTTCT 673  
>novel\_mir\_52 Score: 2.2 R03G\_06416  
Query: 1 TGGGGAAGGAGAAGGGGAGGA 21  
:|:|:|||||:|:|||||

Sbjct: 1212 GCTTCTTCCTCTTTCTCTCCT 1192  
>novel\_mir\_52 Score: 2.5 R03G\_04444  
Query: 1 TGGGGAAGGAGAAGGGGAGGA 21  
||:\*|||||||:||||\*|

Sbjct: 101 ACTACTTCCTCTTTCCCTCGT 81  
>novel\_mir\_52 Score: 2.0 R03G\_04737  
Query: 1 TGGGGAAGGAGAAGGGGA-GGA 21  
|||:|\*|||||||\*|||

Sbjct: 258 ACCTCTCCCTCTTCCCCTTCCT 237  
>novel\_mir\_52 Score: 2.5 R03G\_04878  
Query: 1 TGGGGAAGGAGAAGGGGAGGA 21  
|\*|::||:|||||||

Sbjct: 690 AACTTTTTCTCTTCCCCTCCT 670  
>novel\_mir\_52 Score: 2.5 R03G\_04973  
Query: 1 TGGGGAAGGAGAAGGGGAGGA 21  
|||||||:|:\*|||:||||

Sbjct: 141 ACCCCTTCTTTATCCTCTCCT 121  
>novel\_mir\_52 Score: 2.2 R03G\_05280  
Query: 1 TGGGGAAGGAGAAGGGGAGGA 21  
:|::|||||||:|:||||

Sbjct: 1212 GCTTCTTCCTCTTTCTCTCCT 1192  
>novel\_mir\_52 Score: 2.2 R03G\_02235  
Query: 1 TGGGGAAGGAGAAGGGGAGGA 21  
:|::|||||||:|:||||

Sbjct: 555 GCTTCTTCCTCTTTCTCTCCT 535  
>novel\_mir\_52 Score: 2.2 R03G\_03103  
Query: 1 TGGGGAAGGAGAAGGGGAGGA 21  
:|::|||||||:|:||||

Sbjct: 1212 GCTTCTTCCTCTTTCTCTCCT 1192  
>novel\_mir\_52 Score: 2.5 R03G\_03107  
Query: 1 TGGGGAAGGAGAAGGGGAGGA 21  
|||:|||||\*||:||||\*|

Sbjct: 2707 ACCTCTTCCTGTTTCCCTCAT 2687  
>novel\_mir\_52 Score: 2.2 R03G\_03988  
Query: 1 TGGGGAAGGAGAAGGGGAGGA 21  
:|::|||||||:|:||||

Sbjct: 1212 GCTTCTTCCTCTTTCTCTCCT 1192  
>novel\_mir\_52 Score: 2.2 R03G\_00345  
Query: 1 TGGGGAAGGAGAAGGGGAGGA 21  
||::||||:|||||||:|\*

Sbjct: 24 ACTTCTTCTTCTTCCCCTTCA 4  
>novel\_mir\_52 Score: 2.2 R03G\_01203  
Query: 1 TGGGGAAGGAGAAGGGGAGGA 21  
:|::|||||||:|:||||

Sbjct: 1212 GCTTCTTCCTCTTTCTCTCCT 1192

>novel\_mir\_52 Score: 2.2 R03G\_01691  
Query: 1 TGGGGAAGGAGAAGGGGAGGA 21  
\*||:||||\*||||||:||  
Sbjct: 522 TCCTCTTCCCCTTCCCCTTCT 502

>novel\_mir\_52 Score: 2.2 R03G\_01718  
Query: 1 TGGGGAAGGAGAAGGGGAGGA 21  
:|::||||||:|:||||  
Sbjct: 1212 GCTTCTTCTCTTTCTCTCCT 1192

>novel\_mir\_52 Score: 2.5 R03G\_01909  
Query: 1 TGGGGAAGGAGAAGGGGAGGA 21  
\*||||||\*||||:|:|  
Sbjct: 132 TCCCCTTCCCCTTCTCTTTT 112

>novel\_mir\_15 Score: 1.8 R03G\_17074  
Query: 1 TCTCCTTTTTCTTTTTCTTTTC 22  
:|\*||||||:||||||  
Sbjct: 163 GGAAGAAAAAGAGAAAGAAAAG 142

>novel\_mir\_15 Score: 1.8 R03G\_17074  
Query: 1 TCTCCTTTTTCTTTTTCTTTTC 22  
|\*||||||:||||:|  
Sbjct: 55 AAAGGAAAAAGAGAAAGAAGAG 34

>novel\_mir\_15 Score: 2.5 R03G\_16744  
Query: 1 TCTCCTTTTTCTTTTTCTTTTC 22  
|\*||\*||||||\*|  
Sbjct: 3587 AAAGAAAAAGAAAAAGAAATG 3566

>novel\_mir\_15 Score: 2.5 R03G\_16682  
Query: 1 TCTCCTTTTTCTTTTTCTTTTC 22  
:\*||||||:|:|:||||:|  
Sbjct: 220 GAAGGAAAAGGAAGAAGAAAGG 199

>novel\_mir\_15 Score: 2.5 R03G\_16686  
Query: 1 TCTCCTTTTTCTTTTTCTTTTC 22  
|\*||\*||||||\*|  
Sbjct: 3428 AAAGAAAAAGAAAAAGAAATG 3407

>novel\_mir\_15 Score: 2.5 R03G\_16529  
Query: 1 TCTCCTTTTTCTTTTTCTT-TTC 22  
||:|:|:|:||||:||||\*||  
Sbjct: 674 AGGGGAGAAGAAGAAGAAGAAG 652

>novel\_mir\_15 Score: 2.2 R03G\_16551  
Query: 1 TCTCCTTTTTCTTTTTCTTTTC 22  
:||||:||||\*||||\*|||  
Sbjct: 378 GGAGGAGAAAGATAAAG-AAAG 358

>novel\_mir\_15 Score: 2.2 R03G\_16555  
Query: 1 TCTCCTTTTTCTTTTTCTTTTC 22  
:||||:||||\*||||\*|||  
Sbjct: 378 GGAGGAGAAAGATAAAG-AAAG 358

>novel\_mir\_15 Score: 2.2 R03G\_16149

Query: 1 TCTCCTTTTTCTTTTTCTTT-TC 22  
: ||\*|: |||||\*||  
Sbjct: 617 GGACGGAAAAGAAAAGAAATAG 595  
>novel\_mir\_15 Score: 2.5 R03G\_16152  
Query: 1 TCTCCTTTTTCTTTTTCTT-TTC 22  
|||\*|||: |||||: |||||\*|||  
Sbjct: 80 AGAAGAAGAAGAAGAAGAAG 58  
>novel\_mir\_15 Score: 2.5 R03G\_16161  
Query: 1 TCTCCTTTTTCTTTTTCTTTTC 22  
|||\*|||\*|||: ||\*|||  
Sbjct: 518 AGAGGAAAAGGTAGAG-AAAG 498  
>novel\_mir\_15 Score: 2.2 R03G\_16332  
Query: 1 TCTCCTTTTTCTTTTTCTT-TTC 22  
:\*|||\*|||: |||||\*|||  
Sbjct: 227 GAAGGAAAAGAAGAAGAAGAAG 205  
>novel\_mir\_15 Score: 2.2 R03G\_16006  
Query: 1 TCTCCTTTTTCTTTTTCTTTTC 22  
: ||\*|||: |||||: |||||\*|||  
Sbjct: 1453 GGAAGAAGAAGAGAAAAGAAAAG 1432  
>novel\_mir\_15 Score: 2.5 R03G\_15638  
Query: 1 TCTCCTTTTTCTTTTTCTT-TTC 22  
|||\*|||: |||||: |||||\*|||  
Sbjct: 419 AGAAGAAGAAGAAGAACAAG 397  
>novel\_mir\_15 Score: 1.8 R03G\_15706  
Query: 1 TCTCCTTTTTCTTTTTCTTTTC 22  
: |||||: |||||\*|||\*|||  
Sbjct: 535 GGAGGAAGAAGAAAAGACTAG 514  
>novel\_mir\_15 Score: 2.5 R03G\_15727  
Query: 1 TCTCCTTTTTCTTTTTCTTTTC 22  
|\*|||\*|||: ||\*|||  
Sbjct: 190 AAAGGAAAAGAAGAA-AAAAG 170  
>novel\_mir\_15 Score: 1.8 R03G\_15845  
Query: 1 TCTCCTTTTTCTTTTTCTTTTC 22  
|||\*|||: |||||\*|||: |||||  
Sbjct: 1552 AGAGGAAAAGGAAAACGGAAAG 1531  
>novel\_mir\_15 Score: 2.5 R03G\_15854  
Query: 1 TCTCCTTTTTCTTTTTCTT-TTC 22  
|||\*|||: |||||: |||||\*|||  
Sbjct: 689 AGAAGAAGAAGAAGAAGAAG 667  
>novel\_mir\_15 Score: 2.5 R03G\_15854  
Query: 1 TCTCCTTTTTCTTTTTCTTTTC 22  
: |||\*|||: |||||\*|||: |||  
Sbjct: 178 GGAGCGAAAAGAAAAGGAGAAG 157  
>novel\_mir\_15 Score: 2.5 R03G\_15869  
Query: 1 TCTCCTTTTTCTTTTTCTTTTC 22





Sbjct: 584 TGACGAAAAAGAAAGAGAAATG 563  
>novel\_mir\_15 Score: 2.0 R03G\_15034  
Query: 1 TCTCCTTTTTCTTTTTCTTTTC 22  
|\*|||||:||||:|||||||

Sbjct: 1399 AAAGGAAGAAGAGAAAAGAAAAG 1378  
>novel\_mir\_15 Score: 2.0 R03G\_15117  
Query: 1 TCTCCTTTTTCTTTTTCTTTTC 22  
|\*|||||||:|||||\*

Sbjct: 47 AAAGGAAAAGAAAGAGAAAAC 26  
>novel\_mir\_15 Score: 1.2 R03G\_15120  
Query: 1 TCTCCTTTTTCTTTTTCTTTTC 22  
|||||||:|\*|:|

Sbjct: 466 AGAGGAAAAGAAAAGG-AGAG 446  
>novel\_mir\_15 Score: 2.5 R03G\_15181  
Query: 1 TCTCCTTTTTCTTTTTCTTTTC 22  
||||||:|||||:|\*|\*||

Sbjct: 801 AGAGGAAGAAGAAAGA-ACAAG 781  
>novel\_mir\_15 Score: 2.2 R03G\_14402  
Query: 1 TCTCCTTTTTCTTTTTCT-TTTC 22  
|||\*|||||||\*||

Sbjct: 1705 AGAAGAAAAGAAAAGTTGAAG 1683  
>novel\_mir\_15 Score: 2.5 R03G\_14420  
Query: 1 TCTCCTTTTTCTTTTTCTT-TTC 22  
|||\*|||:|||||:||||\*||

Sbjct: 1796 AGAAGAAGAAGAAGAAGAAG 1774  
>novel\_mir\_15 Score: 2.5 R03G\_14543  
Query: 1 TCTCCTTTTTCTTTTTCTT-TTC 22  
|||\*|||:|||||:||||\*||

Sbjct: 1559 AGAAGAAGAAGAAGAAGAAG 1537  
>novel\_mir\_15 Score: 2.0 R03G\_14544  
Query: 1 TCTCCTTTTTCTTTTTCTT-TTC 22  
||||||:|||||:|||\*|\*||

Sbjct: 1265 AGAGGAAGAAGAAGCAGAAG 1243  
>novel\_mir\_15 Score: 2.5 R03G\_14704  
Query: 1 TCTCCTTTTTCTTTTTCTTTTC 22  
|\*||\*|||||||\*|

Sbjct: 3428 AAAGAAAAAGAAAAGAAATG 3407  
>novel\_mir\_15 Score: 2.5 R03G\_14098  
Query: 1 TCTCCTTTTTCTTTTTCTTTTC 22  
|||\*|||:|||||:||||\*|

Sbjct: 334 AGAAGAAAGAGAAAGAGAAATG 313  
>novel\_mir\_15 Score: 2.5 R03G\_14111  
Query: 1 TCTCCTTTTTCTTTTTCTTTTC 22  
\*\*|||||:|||||||\*|

Sbjct: 1069 CTAGGAAGAAGAAAAGAAAAA 1048

>novel\_mir\_15 Score: 2.5 R03G\_14284  
Query: 1 TCTCCTTTTTCTTTTTCTTTTC 22  
|||||\*|||||\*|||\*  
Sbjct: 1142 AGAGGAACAAGAAAAACAAAAT 1121

>novel\_mir\_15 Score: 2.0 R03G\_13440  
Query: 1 TCTCCTTTTTCTTTTTCTTTTC 22  
|||||:|:|\*|||||  
Sbjct: 1102 AGAGGAGAAGAAAAAGAAAAG 1081

>novel\_mir\_15 Score: 2.5 R03G\_13440  
Query: 1 TCTCCTTTTTCTTTTTCTTTTC 22  
:|||\*|:|||||:|\*|||  
Sbjct: 1057 GGAGAAGAAAGAAAAAGGCAAG 1036

>novel\_mir\_15 Score: 1.2 R03G\_13440  
Query: 1 TCTCCTTTTTCTTTTTCTTTTC 22  
|||||:|:|:|:|  
Sbjct: 811 AGAGGAAAAAGGAAAGGAAAG 790

>novel\_mir\_15 Score: 2.5 R03G\_13450  
Query: 1 TCTCCTTTTTCTTTTTCTTTTC 22  
|\*||\*|||||\*|  
Sbjct: 3245 AAAGAAAAAGAAAAAGAAATG 3224

>novel\_mir\_15 Score: 1.8 R03G\_13511  
Query: 1 TCTCCTTTTTCTTTTTCTTTTC 22  
|||||:|:|:|:|\*|  
Sbjct: 239 AGAGGAAGAAGAAGAAGTG 218

>novel\_mir\_15 Score: 2.2 R03G\_13742  
Query: 1 TCTCCTTTTTCTTTTTCTTTTC 22  
:||||:||||\*||||\*|||  
Sbjct: 378 GGAGGAGAAAGATAAAG-AAAG 358

>novel\_mir\_15 Score: 2.2 R03G\_13848  
Query: 1 TCTCCTTTTTCTTTTTCTTTTC 22  
:||||:||||\*||||\*|||  
Sbjct: 378 GGAGGAGAAAGATAAAG-AAAG 358

>novel\_mir\_15 Score: 2.5 R03G\_13859  
Query: 1 TCTCCTTTTTCTTTTTCTTTTC 22  
|\*||\*|||||\*|  
Sbjct: 3212 AAAGAAAAAGAAAAAGAAATG 3191

>novel\_mir\_15 Score: 2.5 R03G\_12779  
Query: 1 TCTCCTTTTTCTTTTTCTTTTC 22  
|||\*|||:||||:||||\*||  
Sbjct: 502 AGAAGAAGAAGAAGAATAG 481

>novel\_mir\_15 Score: 2.5 R03G\_12845  
Query: 1 TCTCCTTTTTCTTTTTCTTTTC 22  
||||\*|:|:|:|  
Sbjct: 985 AGAGGTGAAGGAGAAAGAAAAG 964

>novel\_mir\_15 Score: 2.5 R03G\_12853

Query: 1 TCTCCTTTTTCTTTTTCTT-TTC 22  
|||||||:||||:||||\*|||  
Sbjct: 137 AGAGGAAGAAGGAGAAGCAGAAG 115  
>novel\_mir\_15 Score: 2.5 R03G\_12882  
Query: 1 TCTCCTTTTTCTTTTTCT-TTTC 22  
|||\*|:|||||||\*|||  
Sbjct: 707 AGAAGGAAAAGAAAAGTTAAAG 685  
>novel\_mir\_15 Score: 2.5 R03G\_12979  
Query: 1 TCTCCTTTTTCTTTTTCTTTTC 22  
|\*||\*|||||||\*|  
Sbjct: 3428 AAAGAAAAAGAAAAGAAATG 3407  
>novel\_mir\_15 Score: 2.5 R03G\_12990  
Query: 1 TCTCCTTTTTCTTTTTCTT-TTC 22  
|||\*|||:|||||:||||\*|||  
Sbjct: 557 AGAAGAAGAAGAAGAAGAAG 535  
>novel\_mir\_15 Score: 2.5 R03G\_13152  
Query: 1 TCTCCTTTTTCTTTTTCTTTTC 22  
|\*||\*|||||||\*|  
Sbjct: 3428 AAAGAAAAAGAAAAGAAATG 3407  
>novel\_mir\_15 Score: 2.5 R03G\_13159  
Query: 1 TCTCCTTTTTCTTTTTCTTTTC 22  
|||||||:|\*|:|:|  
Sbjct: 940 AGAGGAAAAGAGAAGAAGGAG 919  
>novel\_mir\_15 Score: 2.0 R03G\_13255  
Query: 1 TCTCCTTTTTCTTTTTCTT-TTC 22  
||||||\*|||||:||||\*|||  
Sbjct: 218 AGAGGAACAAGAAGAAGAAG 196  
>novel\_mir\_15 Score: 2.5 R03G\_12087  
Query: 1 TCTCCTTTTTCTTTTTCTTTTC 22  
|\*||\*|||||||\*|  
Sbjct: 3428 AAAGAAAAAGAAAAGAAATG 3407  
>novel\_mir\_15 Score: 1.0 R03G\_12101  
Query: 1 TCTCCTTTTTCTTTTTCTTTTC 22  
|||||||:|||||:|||||||  
Sbjct: 1024 AGAGGAAGAAGAAGAAGAAAAG 1003  
>novel\_mir\_15 Score: 2.5 R03G\_12193  
Query: 1 TCTCCTTTTTCTTTTTCTTTTC 22  
|\*||\*|||||||\*|  
Sbjct: 434 AAAGAAAAAGAAAAGAAATG 413  
>novel\_mir\_15 Score: 2.5 R03G\_12233  
Query: 1 TCTCCTTTTTCTTTTTCTTTTC 22  
|||\*|||:|||||||:|\*|||  
Sbjct: 436 AGAAGAAGAAGAAAAGG-AAAG 416  
>novel\_mir\_15 Score: 2.5 R03G\_12385  
Query: 1 TCTCCTTTTTCTTTTTCTTTTC 22

\*||\*|||:||||||\*|||  
Sbjct: 512 TGACGAAAGAGAAAAAG-AAAG 492  
>novel\_mir\_15 Score: 2.5 R03G\_12423  
Query: 1 TCTCCTTTTCTTTTCTT-TTC 22  
||\*|||:||||:||||\*|||  
Sbjct: 320 AGAAGAAGAAGAAGAAGAAGAAG 298  
>novel\_mir\_15 Score: 2.2 R03G\_12554  
Query: 1 TCTCCTTTTCTTTTCTT-TTC 22  
|||||||:|\*|||||:|\*|||  
Sbjct: 308 AGAGGAAAGAAAAAAGGAGAAG 286  
>novel\_mir\_15 Score: 1.8 R03G\_11135  
Query: 1 TCTCCTTTTCTTTTCTTTTC 22  
:|||||||\*||:|||||||  
Sbjct: 238 GGAGGAAAAATAAGAAGAAAAG 217  
>novel\_mir\_15 Score: 2.5 R03G\_11166  
Query: 1 TCTCCTTTTCTTTTCTTTTC 22  
||\*||||:|:|:|||||||  
Sbjct: 1012 AGAAGAAAAGGAGGAAGAAAAG 991  
>novel\_mir\_15 Score: 2.5 R03G\_11210  
Query: 1 TCTCCTTTTCTTTTCTTTTC 22  
:||||\*|:|||||||\*|:  
Sbjct: 1024 GGAGGACGAAGAAAAGAATGG 1003  
>novel\_mir\_15 Score: 2.5 R03G\_11275  
Query: 1 TCTCCTTTTCTTTTCTTTTC 22  
|\*||\*|||||||\*|  
Sbjct: 3587 AAAGAAAAAGAAAAGAAATG 3566  
>novel\_mir\_15 Score: 2.5 R03G\_11291  
Query: 1 TCTCCTTTTCTTTTCTTTTC 22  
||\*|||:|||||||\*|\*|  
Sbjct: 313 AGAAGAAGAAGAAAAGAAATT 292  
>novel\_mir\_15 Score: 2.5 R03G\_11381  
Query: 1 TCTCCTTTTCTTTTCTTTTC 22  
||\*|||:||||:||||\*||  
Sbjct: 454 AGAAGAAGAAGAAGAAGAATAG 433  
>novel\_mir\_15 Score: 1.5 R03G\_11390  
Query: 1 TCTCCTTTTCTTTTCTTTTC 22  
||\*|||||||:|||||||  
Sbjct: 295 AGAAGAAAAGAAGAAGAAAAG 274  
>novel\_mir\_15 Score: 2.5 R03G\_11403  
Query: 1 TCTCCTTTTCTTTTCTTTTC 22  
|\*||\*|||||||\*|  
Sbjct: 3587 AAAGAAAAAGAAAAGAAATG 3566  
>novel\_mir\_15 Score: 2.0 R03G\_11418  
Query: 1 TCTCCTTTTCTTTTCTTTTC 22  
||\*||:||||||:|||||||

Sbjct: 1463 AGAAGAGAAAGAAAGAGAAAAG 1442  
>novel\_mir\_15 Score: 2.5 R03G\_11496  
Query: 1 TCTCCTTTTTCTTTTTCT-TTTC 22  
|||\*||||||||||||||\*\*|||\*  
Sbjct: 113 AGATGAAAAAGAAAAGCTAAAC 91  
>novel\_mir\_15 Score: 2.2 R03G\_11773  
Query: 1 TCTCCTTTTTCTTTTTCTTTTC 22  
:|||||:||||\*|||\*|||  
Sbjct: 378 GGAGGAGAAAGATAAAG-AAAG 358  
>novel\_mir\_15 Score: 2.5 R03G\_11868  
Query: 1 TCTCCTTTTTCTTTTTCTTTTC 22  
:|||||:||:||:||:||:|||  
Sbjct: 1063 GGAGGAGAAGGAGAAGGAGAAG 1042  
>novel\_mir\_15 Score: 2.5 R03G\_11914  
Query: 1 TCTCCTTTTTCTTTTTCT-TTTC 22  
|||||||:||\*||:||||\*|||  
Sbjct: 280 AGAGGAAGAAAAAGAAGAAAAAG 258  
>novel\_mir\_15 Score: 2.5 R03G\_10410  
Query: 1 TCTCCTTTTTCTTTTTCT-TTTC 22  
|||\*|:||||||||||||||\*\*|||  
Sbjct: 707 AGAAGGAAAAGAAAAGTTAAAG 685  
>novel\_mir\_15 Score: 2.0 R03G\_10412  
Query: 1 TCTCCTTTTTCTTTTTCTTTTC 22  
|\*||||\*|||||||||||||  
Sbjct: 601 AAAGGAATAAGAAAAGAAAAG 580  
>novel\_mir\_15 Score: 2.5 R03G\_10458  
Query: 1 TCTCCTTTTTCTTTTTCTTTTC 22  
|||||:|||\*|:||||\*|||  
Sbjct: 300 AGAGGAGAAAAGAAAGACAAG 279  
>novel\_mir\_15 Score: 2.5 R03G\_10467  
Query: 1 TCTCCTTTTTCTTTTTCTT-TTC 22  
|||\*|||:|||||:||||\*|||  
Sbjct: 218 AGAAGAAGAAGAAGAAGAAG 196  
>novel\_mir\_15 Score: 2.5 R03G\_10555  
Query: 1 TCTCCTTTTTCTTTTTCTTTTC 22  
|\*||\*||||||||||||||\*|  
Sbjct: 3428 AAAGAAAAAGAAAAGAAATG 3407  
>novel\_mir\_15 Score: 2.5 R03G\_10560  
Query: 1 TCTCCTTTTTCTTTTTCTTTTC 22  
|\*||\*||||||||||||||\*|  
Sbjct: 3587 AAAGAAAAAGAAAAGAAATG 3566  
>novel\_mir\_15 Score: 1.8 R03G\_10586  
Query: 1 TCTCCTTTTTCTTTTTCTTTTC 22  
|||||||||||||||:|\*:\*|  
Sbjct: 136 AGAGGAAAAGAAAAGGTGACG 115

>novel\_mir\_15 Score: 2.0 R03G\_10605  
Query: 1 TCTCCTTTTTCTTTTTCTTTTC 22  
|\*:||||:|||||||  
Sbjct: 109 AAGGGAAGAAGAAAAGAAAAG 88

>novel\_mir\_15 Score: 2.5 R03G\_10712  
Query: 1 TCTCCTTTTTCTTTTTCTT-TTC 22  
|||\*|||:||||:||||\*|||  
Sbjct: 1166 AGAAGAAGAAGAAGAAGAAG 1144

>novel\_mir\_15 Score: 2.5 R03G\_10713  
Query: 1 TCTCCTTTTTCTTTTTCTTTTC 22  
|||\*||||\*|||||||\*  
Sbjct: 684 AGAAGAAAATGAAAAGAAAAT 663

>novel\_mir\_15 Score: 2.0 R03G\_10854  
Query: 1 TCTCCTTTTTCTTTTTCTTTTC 22  
|||\*|||||||:||||||\*  
Sbjct: 1802 AGAAGAAAAGAAGAAGAAAAC 1781

>novel\_mir\_15 Score: 2.5 R03G\_11058  
Query: 1 TCTCCTTTTTCTTTTTCTT-TTC 22  
|||\*|||:||||:||||\*|||  
Sbjct: 539 AGAAGAAGAAGAAGAACAAG 517

>novel\_mir\_15 Score: 2.5 R03G\_09240  
Query: 1 TCTCCTTTTTCTTTTTCTTTTC 22  
|||\*||:|||||||\*|||\*  
Sbjct: 347 AGAAGAGAAAAGAAAAGCAAAA 326

>novel\_mir\_15 Score: 2.5 R03G\_09298  
Query: 1 TCTCCTTTTTCTTTTTCTTTTC 22  
\*||\*|||||:|||:|||||||  
Sbjct: 694 TGAAGAAAAGGAAGAAGAAAAG 673

>novel\_mir\_15 Score: 2.0 R03G\_09319  
Query: 1 TCTCCTTTTTCTTTTTCTT-TTC 22  
|||||||:|:||||||\*\*||  
Sbjct: 848 AGAGAAAAGGGAAAAGAACTAG 826

>novel\_mir\_15 Score: 2.2 R03G\_09426  
Query: 1 TCTCCTTTTTCTTTTTCTTTTC 22  
|||\*|||:||||||:||:|||  
Sbjct: 1703 AGATGAAGAAGAAAAGGAGAAG 1682

>novel\_mir\_15 Score: 2.2 R03G\_09435  
Query: 1 TCTCCTTTTTCTTTTTCTTTTC 22  
:||\*|||||||:||||\*|  
Sbjct: 230 GGAAGAAAAGAAAAGGAAATG 209

>novel\_mir\_15 Score: 2.2 R03G\_09607  
Query: 1 TCTCCTTTTTCTTTTTCTTTTC 22  
:||||:||||\*||||\*|||  
Sbjct: 378 GGAGGAGAAAGATAAAG-AAAG 358

>novel\_mir\_15 Score: 2.5 R03G\_09697

Query: 1 TCTCCTTTTTCTTTTTCTT-TTC 22  
|||\*|:|||||:||||\*|||  
Sbjct: 281 AGAAGGAAAAGAAGAAGAAG 259  
>novel\_mir\_15 Score: 2.5 R03G\_09755  
Query: 1 TCTCCTTTTTCTTTTTCTT-TTC 22  
|||\*|||:|||||:||||\*|||  
Sbjct: 2243 AGAAGAAGAAGAAGAAGAAG 2221  
>novel\_mir\_15 Score: 1.5 R03G\_09778  
Query: 1 TCTCCTTTTTCTTTTTCTTTTC 22  
|||||||\*|||  
Sbjct: 1461 AGAGGAAAAGAAAAGAACTAAAG 1440  
>novel\_mir\_15 Score: 2.2 R03G\_09868  
Query: 1 TCTCCTTTTTCTTTTTCTTTTC 22  
|||\*|||:|||||:||||:|  
Sbjct: 395 AGAAGAAGAAGAAGAAGAAGAG 374  
>novel\_mir\_15 Score: 2.5 R03G\_09894  
Query: 1 TCTCCTTTTTCTTTTTCTT-TTC 22  
||\*|||:|||||:||\*|||  
Sbjct: 1633 AGCGGAAAAGGAAAAGGAACAAG 1611  
>novel\_mir\_15 Score: 2.5 R03G\_10079  
Query: 1 TCTCCTTTTTCTTTTTCTT-TTC 22  
|||\*|||:|||||:||||\*|||  
Sbjct: 740 AGAAGAAGAAGAAGAAGAAG 718  
>novel\_mir\_15 Score: 2.5 R03G\_08080  
Query: 1 TCTCCTTTTTCTTTTTCTTTTC 22  
\*|||\*|||\*|||\*|||\*|||  
Sbjct: 190 CGAGGTAAAAGACAAAGAAAAG 169  
>novel\_mir\_15 Score: 2.2 R03G\_08165  
Query: 1 TCTCCTTTTTCTTTTTCTTTTC 22  
:||\*|||:||:|||||||  
Sbjct: 757 GGAAGAAAAGGAGAAAGAAAAG 736  
>novel\_mir\_15 Score: 2.5 R03G\_08243  
Query: 1 TCTCCTTTTTCTTTTTCTT-TTC 22  
|||\*|||:|||||:||||\*|||  
Sbjct: 74 AGAAGAAGAAGAAGAAGAAG 52  
>novel\_mir\_15 Score: 2.5 R03G\_08358  
Query: 1 TCTCCTTTTTCTTTTTCTT-TTC 22  
|||\*|||:|||||:||||\*|||  
Sbjct: 1106 AGATGAAGAAGAAGAAGAAG 1084  
>novel\_mir\_15 Score: 2.5 R03G\_08412  
Query: 1 TCTCCTTTTTCTTTTTCTT-TTC 22  
|||\*|||:|||||:||||\*|||  
Sbjct: 656 AGAAGAAGAAGAAGAAGAAG 634  
>novel\_mir\_15 Score: 2.5 R03G\_08542  
Query: 1 TCTCCTTTTTCTTTTTCTTTTC 22



|||||:||||:|\*|||\*  
Sbjct: 160 AGAGGAAGAAGAAGAA-AAAAT 140  
>novel\_mir\_15 Score: 2.5 R03G\_08612  
Query: 1 TTCCTTTTTCTTTTTCTTTTC 22  
|\*||\*|||||\*|  
Sbjct: 3428 AAAGAAAAAGAAAAAGAAATG 3407  
>novel\_mir\_15 Score: 1.8 R03G\_08620  
Query: 1 TTCCTTTTTCTTTTTCTTTTC 22  
|||||:||||:||||:|  
Sbjct: 214 AGAGGAAGAAGAGGAAGAAGAG 193  
>novel\_mir\_15 Score: 2.5 R03G\_08623  
Query: 1 TTCCTTTTTCTTTTTCTT-TTC 22  
||\*|||:||||:||||\*|||  
Sbjct: 419 AGAAGAAGAAGAAGAAGAAG 397  
>novel\_mir\_15 Score: 2.2 R03G\_08661  
Query: 1 TTCCTTTTTCTTTTTCTTTTC 22  
:||||:||||\*|||\*|||  
Sbjct: 378 GGAGGAGAAAGATAAAG-AAAG 358  
>novel\_mir\_15 Score: 2.2 R03G\_08748  
Query: 1 TTCCTTTTTCTTTTTCTTTTC 22  
||\*|||||\*|:|||  
Sbjct: 406 AGAAGAAAAAGAAAAAGAAG 385  
>novel\_mir\_15 Score: 2.0 R03G\_08798  
Query: 1 TTCCTTTTTCTTTTTCT-TTTC 22  
|\*|||||\*|||\*  
Sbjct: 386 AAAGAAAAAGAAAAAGATAAAC 364  
>novel\_mir\_15 Score: 2.2 R03G\_08846  
Query: 1 TTCCTTTTTCTTTTTCTTTTC 22  
:||||:||||\*|||\*|||  
Sbjct: 378 GGAGGAGAAAGATAAAG-AAAG 358  
>novel\_mir\_15 Score: 2.0 R03G\_08999  
Query: 1 TTCCTTTTTCTTTTTCTTTTC 22  
||\*|||:|||||\*|  
Sbjct: 583 AGAAGAAAGAGAAAAAGAAACG 562  
>novel\_mir\_15 Score: 2.0 R03G\_09019  
Query: 1 TTCCTTTTTCTTTTTCTTTTC 22  
||\*|:|||||\*|||:|  
Sbjct: 38 AGAAGAAAAGAAAAAGAGGAG 17  
>novel\_mir\_15 Score: 2.0 R03G\_09061  
Query: 1 TTCCTTTTTCTTTTTCTT-TTC 22  
||\*|||||:||||\*|||  
Sbjct: 2168 AGAAGAAAAGAAGAAGAAGAAG 2146  
>novel\_mir\_15 Score: 2.5 R03G\_06744  
Query: 1 TTCCTTTTTCTTTTTCTTTTC 22  
||\*|:|||||:||\*|||

Sbjct: 464 AGATGGAAAAGAAAGAG-AAAG 444  
>novel\_mir\_15 Score: 2.5 R03G\_06877  
Query: 1 TCTCCTTTTTCTTTTTCTT-TTC 22  
|||\*|||||||:|:|||||\*|||

Sbjct: 1322 AGAAGAAAAGGAGAAGAAGAAG 1300  
>novel\_mir\_15 Score: 2.5 R03G\_06906  
Query: 1 TCTCCTTTTTCTTTTTCTTTTC 22  
|||\*|||:||||:||||\*|||

Sbjct: 227 AGAAGAAGAAGAGAAAG-AAAG 207  
>novel\_mir\_15 Score: 2.2 R03G\_07072  
Query: 1 TCTCCTTTTTCTTTTTCT-TTTC 22  
|||\*|||||||:|||:\*|||

Sbjct: 458 AGAAGAAAAGAAGAAGGAAAAG 436  
>novel\_mir\_15 Score: 2.2 R03G\_07217  
Query: 1 TCTCCTTTTTCTTTTTCTTTTC 22  
:||\*|||:|||||:|||||||

Sbjct: 493 GGAAGAAGAAGAAGAAGAAAAG 472  
>novel\_mir\_15 Score: 2.2 R03G\_07217  
Query: 1 TCTCCTTTTTCTTTTTCTTTTC 22  
:||\*|||:|||||:|||||||

Sbjct: 442 GGAAGAAGAAGAAGAAGAAAAG 421  
>novel\_mir\_15 Score: 1.2 R03G\_07217  
Query: 1 TCTCCTTTTTCTTTTTCTT-TTC 22  
:|||||||:|||||:|||||||

Sbjct: 388 GGAGGAAAAGAAAAGGAAGAAG 366  
>novel\_mir\_15 Score: 2.2 R03G\_07217  
Query: 1 TCTCCTTTTTCTTTTTCTTTTC 22  
:||\*|||:|||||:|||||||

Sbjct: 304 GGAAGAAGAAGAAGAAGAAAAG 283  
>novel\_mir\_15 Score: 2.2 R03G\_07291  
Query: 1 TCTCCTTTTTCTTTTTCTTTTC 22  
\*|||\*|||:|||||||:|||

Sbjct: 1159 CGAGAAAAGGAAAAGAGAAG 1138  
>novel\_mir\_15 Score: 2.5 R03G\_07305  
Query: 1 TCTCCTTTTTCTTTTTCTTTTC 22  
|\*||\*|||||||\*|

Sbjct: 3428 AAAGAAAAAGAAAAGAAATG 3407  
>novel\_mir\_15 Score: 2.2 R03G\_07322  
Query: 1 TCTCCTTTTTCTTTTTCTTTT-C 22  
|||\*|||||||:|||||:||\*|

Sbjct: 497 AGAAGAAAAGGAAAAGAGAACG 475  
>novel\_mir\_15 Score: 1.8 R03G\_07351  
Query: 1 TCTCCTTTTTCTTTTTCTTTTC 22  
|||||||:|\*|

Sbjct: 835 AGAGGAAAAGAAAAGAGAAG 814

>novel\_mir\_15 Score: 2.5 R03G\_07561  
Query: 1 TCTCCTTTTTCTTTTTCTTTTC 22  
|||||:|\*|||:||||\*||  
Sbjct: 361 AGAGGAGAACGAAGAAGAACAG 340

>novel\_mir\_15 Score: 1.2 R03G\_07561  
Query: 1 TCTCCTTTTTCTTTTTCTTTTC 22  
|||||:||||:|||||:||  
Sbjct: 196 AGAGGAAGAAGAGAAAGAAGAG 175

>novel\_mir\_15 Score: 2.5 R03G\_07619  
Query: 1 TCTCCTTTTTCTTTTTCTT-TTC 22  
||\*|||:||||:||||\*|||  
Sbjct: 1856 AGAAGAAGAAGAAGAAGAAG 1834

>novel\_mir\_15 Score: 2.2 R03G\_07704  
Query: 1 TCTCCTTTTTCTTTTTCTTTTC 22  
:||||:||||\*||||\*|||  
Sbjct: 378 GGAGGAGAAAGATAAAG-AAAG 358

>novel\_mir\_15 Score: 1.5 R03G\_07923  
Query: 1 TCTCCTTTTTCTTTTTCT-TTTC 22  
|||||||\*|||||\*|||  
Sbjct: 593 AGAGGAAAAACAAAAGAAAAG 571

>novel\_mir\_15 Score: 2.0 R03G\_07949  
Query: 1 TCTCCTTTTTCTTTTTCTT-TTC 22  
||\*|||||||:||||\*|||  
Sbjct: 272 AGAAGAAAAGAAGAAGAAGAAG 250

>novel\_mir\_15 Score: 2.2 R03G\_05622  
Query: 1 TCTCCTTTTTCTTTTTCTTTTC 22  
:||||:||||\*||||\*|||  
Sbjct: 378 GGAGGAGAAAGATAAAG-AAAG 358

>novel\_mir\_15 Score: 2.5 R03G\_05630  
Query: 1 TCTCCTTTTTCTTTTTCTTTTC 22  
|\*||\*|||||||\*|||  
Sbjct: 3347 AAAGAAAAAGAAAAGAAATG 3326

>novel\_mir\_15 Score: 2.2 R03G\_05635  
Query: 1 TCTCCTTTTTCTTTTTCTTTTC 22  
:||||:||||\*||||\*|||  
Sbjct: 378 GGAGGAGAAAGATAAAG-AAAG 358

>novel\_mir\_15 Score: 2.5 R03G\_05746  
Query: 1 TCTCCTTTTTCTTTTTCTTTTC 22  
:|||||||\*||\*||:|||  
Sbjct: 331 GGAGGAAAAGTAACAGGAAAG 310

>novel\_mir\_15 Score: 2.5 R03G\_05754  
Query: 1 TCTCCTTTTTCTTTTTCTT-TTC 22  
||\*|||:||||:||||\*|||  
Sbjct: 632 AGAAGAAGAAGAAGAAGAAG 610

>novel\_mir\_15 Score: 2.5 R03G\_05804

Query: 1 TCTCCTTTTTCTTTTTCTTTTC 22  
:|||||:|\*|:|  
Sbjct: 229 GGAGGAAAAGAGAAGAAGAAG 208  
>novel\_mir\_15 Score: 1.8 R03G\_05857  
Query: 1 TCTCCTTTTTCTTTTTCTTTTC 22  
:|\*|:|:|  
Sbjct: 64 GGAAGAAAAGAAGAAGAAAAG 43  
>novel\_mir\_15 Score: 2.5 R03G\_05884  
Query: 1 TCTCCTTTTTCTTTTTCTT-TTC 22  
||\*|:|:|\*|  
Sbjct: 1226 AGAAGAAGAAGAAGAAGAAG 1204  
>novel\_mir\_15 Score: 2.5 R03G\_05998  
Query: 1 TCTCCTTTTTCTTTTTCTTTTC 22  
|\*|:|\*|\*  
Sbjct: 2185 AAAGGAAAAGGAAAAGTAAAA 2164  
>novel\_mir\_15 Score: 2.2 R03G\_06032  
Query: 1 TCTCCTTTTTCTTTTTCT-TTTC 22  
||\*|:|:|\*|  
Sbjct: 371 AGAAGAAAAGAAGAAGGAAAAG 349  
>novel\_mir\_15 Score: 2.2 R03G\_06085  
Query: 1 TCTCCTTTTTCTTTTTCTTTTC 22  
||:|:|\*|  
Sbjct: 314 AGAGGAAGGAGAAGAAGTGAAG 293  
>novel\_mir\_15 Score: 2.5 R03G\_06143  
Query: 1 TCTCCTTTTTCTTTTTCTT-TTC 22  
||\*||\*|:|\*|  
Sbjct: 206 AGAAGAACAAGAAAAGAAGAAG 184  
>novel\_mir\_15 Score: 2.5 R03G\_06143  
Query: 1 TCTCCTTTTTCTTTTTCT-TTTC 22  
||\*|:|:|\*|  
Sbjct: 176 AGAAGGAAAAGAAGAAGAAAAG 154  
>novel\_mir\_15 Score: 1.0 R03G\_06159  
Query: 1 TCTCCTTTTTCTTTTTCTTTTC 22  
||:|:|:|  
Sbjct: 1423 AGAGGAAGAAGAGAAAAGAAAAG 1402  
>novel\_mir\_15 Score: 1.8 R03G\_06204  
Query: 1 TCTCCTTTTTCTTTTTCTTTTC 22  
||\*|:|\*|\*  
Sbjct: 3403 AGAAGAAAAGAAAAGAAGAA 3382  
>novel\_mir\_15 Score: 2.5 R03G\_06283  
Query: 1 TCTCCTTTTTCTTTTTCTTTTC 22  
||\*||\*|:|:|  
Sbjct: 1435 AGAGAAAAATAGAAAGAAAAG 1414  
>novel\_mir\_15 Score: 2.2 R03G\_06299  
Query: 1 TCTCCTTTTTCTTTTTCTTTTC 22



Sbjct: 919 AGAAGAAAAAGAGAAGGAGAAAG 897  
>novel\_mir\_15 Score: 1.5 R03G\_04550  
Query: 1 TCTCCTTTTTCTTTTTCTT-TTC 22  
|||||||:|||||:||||\*|||

Sbjct: 1238 AGAGGAAGAAGAAGAAGAAG 1216  
>novel\_mir\_15 Score: 2.2 R03G\_04550  
Query: 1 TCTCCTTTTTCTTTTTCTTTTC 22  
|||\*|||:|||||:|||||:||

Sbjct: 464 AGAAGAAGAAGAAGAAGAG 443  
>novel\_mir\_15 Score: 2.5 R03G\_04734  
Query: 1 TCTCCTTTTTCTTTTTCTTTTC 22  
||||||:||:|||:|:|:|:|

Sbjct: 233 AGAGGAGAAGGAAGAGGAGGAG 212  
>novel\_mir\_15 Score: 2.0 R03G\_04821  
Query: 1 TCTCCTTTTTCTTTTTCT-TTTC 22  
||||\*||||:|||||||\*|||

Sbjct: 153 AGAGAAAAGGAAAAGAGAAAG 131  
>novel\_mir\_15 Score: 2.5 R03G\_04859  
Query: 1 TCTCCTTTTTCTTTTTCTTTTC 22  
:||\*|||:|||||||:||:|||

Sbjct: 187 GGACGAAGAAGAAAAGGAGAAG 166  
>novel\_mir\_15 Score: 2.5 R03G\_04929  
Query: 1 TCTCCTTTTTCTTTTTCTTT-TC 22  
|||\*|||||||:||||||\*|\*|

Sbjct: 461 AGAAGAAAAGAAGAAGAAATAA 439  
>novel\_mir\_15 Score: 2.5 R03G\_04992  
Query: 1 TCTCCTTTTTCTTTTTCTTTTC 22  
||\*|||||||:||:||||\*|

Sbjct: 217 AGTGGAAAAGAGAAGGAAACG 196  
>novel\_mir\_15 Score: 2.2 R03G\_05066  
Query: 1 TCTCCTTTTTCTTTTTCTTTTC 22  
|||\*|||:|||||||:|\*|

Sbjct: 215 AGAAGAAGAAGAAAAGAAGAA 194  
>novel\_mir\_15 Score: 2.0 R03G\_05103  
Query: 1 TCTCCTTTTTCTTTTTCTTTTC 22  
|\*|||:|||||||:|||||||

Sbjct: 1124 ACAGGGAAAAGAAGAAGAAAAG 1103  
>novel\_mir\_15 Score: 2.5 R03G\_05280  
Query: 1 TCTCCTTTTTCTTTTTCTTTTC 22  
|\*||\*|||||||:|\*|

Sbjct: 3428 AAAGAAAAAGAAAAGAAATG 3407  
>novel\_mir\_15 Score: 2.5 R03G\_05302  
Query: 1 TCTCCTTTTTCTTTTTCTTTTC 22  
|||\*|||:|||||:|||\*|||

Sbjct: 965 AGAAGAAGAAGAAG-AAAG 945

>novel\_mir\_15 Score: 2.5 R03G\_02235  
Query: 1 TCTCCTTTTTCTTTTTCTTTTC 22  
|\*||\*|||||||\*|  
Sbjct: 2771 AAAGAAAAAGAAAAAGAAATG 2750

>novel\_mir\_15 Score: 2.2 R03G\_02244  
Query: 1 TCTCCTTTTTCTTTTTCTTTTC 22  
|||||:|||||:|\*:\*|\*  
Sbjct: 164 AGAGGAAGAAGAAAAGGACGAC 143

>novel\_mir\_15 Score: 2.5 R03G\_02253  
Query: 1 TCTCCTTTTTCTTTTTCTT-TTC 22  
||\*|||||||:|\*|||  
Sbjct: 221 AGAAGAAAAAGAAAGGAGAAGAAG 199

>novel\_mir\_15 Score: 2.5 R03G\_02361  
Query: 1 TCTCCTTTTTCTTTTTCTT-TTC 22  
||\*||:|||||:||||\*|||  
Sbjct: 167 AGATGAGAAAGAAGAAGAAGAAG 145

>novel\_mir\_15 Score: 2.5 R03G\_02384  
Query: 1 TCTCCTTTTTCTTTTTCTTTTC 22  
:\*||||:|||||||\*|:|  
Sbjct: 1477 GTAGGAAGAAGAAAAAG-AGAG 1457

>novel\_mir\_15 Score: 2.0 R03G\_02549  
Query: 1 TCTCCTTTTTCTTTTTCT-TTTC 22  
||\*|||||||:||\*|||  
Sbjct: 236 AGAAGAAAAAGAAAGACAAAG 214

>novel\_mir\_15 Score: 2.0 R03G\_02771  
Query: 1 TCTCCTTTTTCTTTTTCTTTTC 22  
||\*|||||||:|||||||\*  
Sbjct: 365 AGACGAAAAAGGAAAAGAAAAC 344

>novel\_mir\_15 Score: 1.8 R03G\_02855  
Query: 1 TCTCCTTTTTCTTTTTCTT-TTC 22  
||\*|||||||\*||  
Sbjct: 557 AGAAGAAAAAGAAAAAGGAG 535

>novel\_mir\_15 Score: 1.8 R03G\_02859  
Query: 1 TCTCCTTTTTCTTTTTCTTTTC 22  
:|\*||||:|||||||  
Sbjct: 721 GGTGGAAGAAGAAAAAGAAAAG 700

>novel\_mir\_15 Score: 2.5 R03G\_02860  
Query: 1 TCTCCTTTTTCTTTTTCTTTTC 22  
||\*||||:||:||\*|||  
Sbjct: 1052 AGAAGAAAAGGAAGAAGCAAAG 1031

>novel\_mir\_15 Score: 2.5 R03G\_02991  
Query: 1 TCTCCTTTTTCTTTTTCTTTTC 22  
||\*|||:||||:||:|:|  
Sbjct: 152 AGAAGAAGAAGAAGAAGGAGAG 131

>novel\_mir\_15 Score: 2.5 R03G\_03024

Query: 1 TCTCCTTTTTCTTTTTCTTTT-C 22  
|||\*|||:||||:|||||\*|  
Sbjct: 512 AGAAGAAGAAGAAGAAGAAAATG 490  
>novel\_mir\_15 Score: 2.5 R03G\_03032  
Query: 1 TCTCCTTTTTCTTTTTCT-TTTC 22  
|||\*|||||||:|||:\*:||  
Sbjct: 728 AGAAGAAAAAGAAGAAGGTAGAG 706  
>novel\_mir\_15 Score: 2.5 R03G\_03103  
Query: 1 TCTCCTTTTTCTTTTTCTTTTC 22  
|\*||\*|||||||\*|  
Sbjct: 3428 AAAGAAAAAGAAAAAGAAATG 3407  
>novel\_mir\_15 Score: 2.5 R03G\_03130  
Query: 1 TCTCCTTTTTCTTTTTCTTTTC 22  
|||\*|||||\*|:|||||||  
Sbjct: 657 AGAAGAAAAAAGAAAGAAAAG 636  
>novel\_mir\_15 Score: 2.5 R03G\_03196  
Query: 1 TCTCCTTTTTCTTTTTCTTTTC 22  
|\*|||||:|||||||\*|\*  
Sbjct: 2620 AAAGGAAGAAGAAAAAGAACAC 2599  
>novel\_mir\_15 Score: 1.8 R03G\_03207  
Query: 1 TCTCCTTTTTCTTTTTCTTTTC 22  
|||\*|||||||\*|:|||  
Sbjct: 190 AGAAGAAAAAGAAAAAGCGAAG 169  
>novel\_mir\_15 Score: 1.0 R03G\_03214  
Query: 1 TCTCCTTTTTCTTTTTCTTTTC 22  
|\*|||||||\*|  
Sbjct: 337 AAAGGAAAAAGAAAAAGAAAAG 316  
>novel\_mir\_15 Score: 2.5 R03G\_03381  
Query: 1 TCTCCTTTTTCTTTTTCTT-TTC 22  
|||||||:||||:|\*|||\*|||  
Sbjct: 1660 AGAGGAAAGAGAAGTAGAAGAAG 1638  
>novel\_mir\_15 Score: 2.5 R03G\_03481  
Query: 1 TCTCCTTTTTCTTTTTCTTTTC 22  
:|||||:||:||:||:||:|||  
Sbjct: 457 GGAGGAGAAGGAGAAGGAGAAG 436  
>novel\_mir\_15 Score: 2.5 R03G\_03532  
Query: 1 TCTCCTTTTTCTTTTTCTTTTC 22  
\*\*:||||:|||||||\*|  
Sbjct: 1657 TTGGGAAGAAGAAAAAGAAAAG 1636  
>novel\_mir\_15 Score: 2.5 R03G\_03544  
Query: 1 TCTCCTTTTTCTTTTTCTT-TTC 22  
|||\*|||:||||:||||\*|||  
Sbjct: 758 AGAAGAAGAAGAAGAAGAAGAAG 736  
>novel\_mir\_15 Score: 2.2 R03G\_03571  
Query: 1 TCTCCTTTTTCTTTTTCTTTTC 22





Sbjct: 1462 AGAGAAAGAAGAGGAAGAAAAG 1441  
>novel\_mir\_15 Score: 1.8 R03G\_00529  
Query: 1 TCTCCTTTTTCTTTTTCTTTTC 22  
\*||\*|||||||:|||

Sbjct: 1094 TGAAGAAAAGAAAAGAGAAG 1073  
>novel\_mir\_15 Score: 2.5 R03G\_00588  
Query: 1 TCTCCTTTTTCTTTTTCTTTTC 22  
|||\*|||||||\*\*|\*|

Sbjct: 430 AGAAGAAAAGAAAAG-CATG 410  
>novel\_mir\_15 Score: 2.0 R03G\_00887  
Query: 1 TCTCCTTTTTCTTTTTCTT-TTC 22  
\*|||||||:|||:||||\*|||

Sbjct: 785 TGAGGAAAAGGAAGAACAAG 763  
>novel\_mir\_15 Score: 2.5 R03G\_00906  
Query: 1 TCTCCTTTTTCTTTTTCTT-TTC 22  
|||\*|||:||||:||||\*|||

Sbjct: 386 AGAAGAAGAAGAAGAAGAAG 364  
>novel\_mir\_15 Score: 2.5 R03G\_00930  
Query: 1 TCTCCTTTTTCTTTTTCTT-TTC 22  
|||\*|||:||||:||||\*|||

Sbjct: 998 AGAAGAAGAAGAAGAAGAAG 976  
>novel\_mir\_15 Score: 2.5 R03G\_00930  
Query: 1 TCTCCTTTTTCTTTTTCTTTTC 22  
|||\*|:|||||||:|||\*|

Sbjct: 29 AGAAGAAAAGAAAAGGAAATG 8  
>novel\_mir\_15 Score: 1.5 R03G\_00983  
Query: 1 TCTCCTTTTTCTTTTTCTT-TTC 22  
||||||:||||:||||\*|||

Sbjct: 287 AGAGGAAGAAGAAGAAGAAG 265  
>novel\_mir\_15 Score: 2.0 R03G\_00993  
Query: 1 TCTCCTTTTTCTTTTTCTTTTC 22  
|\*||||:||||:|||||||

Sbjct: 835 ATAGGAAGAAGAAGAAGAAAAG 814  
>novel\_mir\_15 Score: 2.0 R03G\_00993  
Query: 1 TCTCCTTTTTCTTTTTCTTTTC 22  
|||\*|||:|||||||\*|

Sbjct: 730 AGAAGAAGAAGAAAAGAAAAA 709  
>novel\_mir\_15 Score: 1.5 R03G\_00993  
Query: 1 TCTCCTTTTTCTTTTTCTTTTC 22  
|||\*|||||||\*||

Sbjct: 592 AGAAGAAAAGAAAAGAATAG 571  
>novel\_mir\_15 Score: 2.5 R03G\_00993  
Query: 1 TCTCCTTTTTCTTTTTCTTTTC 22  
|\*||||:||||||:|||\*||

Sbjct: 517 AAAGGAAGAAGAAAAGGAACAG 496

>novel\_mir\_15 Score: 2.5 R03G\_00993  
Query: 1 TCTCCTTTTTCTTTTTCTTTTC 22  
|||\*|||:|||||||\*|||  
Sbjct: 478 AGAAGAAGAAGAAAAAAAAG 457

>novel\_mir\_15 Score: 2.5 R03G\_01203  
Query: 1 TCTCCTTTTTCTTTTTCTTTTC 22  
|\*||\*|||||||\*|  
Sbjct: 3587 AAAGAAAAAGAAAAAGAAATG 3566

>novel\_mir\_15 Score: 2.5 R03G\_01474  
Query: 1 TCTCCTTTTTCTTTTTCTTTTC 22  
|||\*|||:||||:|||\*|||  
Sbjct: 361 AGAAGAAGAAGAAGAAG-AAAG 341

>novel\_mir\_15 Score: 2.5 R03G\_01516  
Query: 1 TCTCCTTTTTCTTTTTCTTTTC 22  
|\*|||||:||||||\*|||  
Sbjct: 1663 AAAGGAAAGGGAAAAAG-AAAG 1643

>novel\_mir\_15 Score: 2.5 R03G\_01595  
Query: 1 TCTCCTTTTTCTTTTTCTTTTC 22  
||:|||||:||||:||||:|\*  
Sbjct: 725 AGGGGAAAGAGAAGAAGAGGAA 704

>novel\_mir\_15 Score: 2.5 R03G\_01661  
Query: 1 TCTCCTTTTTCTTTTTCTT-TTC 22  
|||\*|||:|||||:||||\*|||  
Sbjct: 1601 AGAAGAAGAAGAAGAAGAAGAAG 1579

>novel\_mir\_15 Score: 2.5 R03G\_01718  
Query: 1 TCTCCTTTTTCTTTTTCTTTTC 22  
|\*||\*|||||||\*|  
Sbjct: 3587 AAAGAAAAAGAAAAAGAAATG 3566

>novel\_mir\_15 Score: 2.5 R03G\_01774  
Query: 1 TCTCCTTTTTCTTTTTCTT-TTC 22  
|||\*|||:|||||:||||\*|||  
Sbjct: 344 AGAAGAAGAAGAAGAAGAAGAAG 322

>novel\_mir\_15 Score: 2.5 R03G\_01798  
Query: 1 TCTCCTTTTTCTTTTTCTT-TTC 22  
||\*||||:|||||:||||\*|||  
Sbjct: 224 AGCGGAAGAAGAAGAAGAAGAAG 202

>novel\_mir\_15 Score: 2.5 R03G\_01918  
Query: 1 TCTCCTTTTTCTTTTTCTTTTC 22  
||:||||:|||||||\*||\*||  
Sbjct: 792 AGGGGAAGAAGAAAAACAATAG 771

>novel\_mir\_15 Score: 2.5 R03G\_02017  
Query: 1 TCTCCTTTTTCTTTTTCT-TTTC 22  
|||||:|:|||:|:|||\*|||  
Sbjct: 127 AGAGGAGAGAGAGAGAGAAAAAG 105

>novel\_mir\_15 Score: 2.5 R03G\_02044

Query: 1 TCTCCTTTTTCTTTTTCTTTTC 22  
|||\*|||:|||||\*|||  
Sbjct: 1685 AGACGAAAAAGAAGAA-AAAAG 1665  
>novel\_mir\_15 Score: 2.5 R03G\_02044  
Query: 1 TCTCCTTTTTCTTTTTCTTTTC 22  
||\*|||:|||||\*  
Sbjct: 1189 AGTGAAGAAGAAGAAGAAAAA 1168  
>novel\_mir\_15 Score: 2.2 R03G\_17108  
Query: 1 TCTCCTTTTTCTTTTTCTTTTC 22  
|||\*|||:|||||:|||||:|||  
Sbjct: 2411 AGAAGAAGAAGAGAAAGAGAAG 2390  
>novel\_mir\_15 Score: 2.0 R03G\_16999  
Query: 1 TCTCCTTTTTCTTTTTCTT-TTC 22  
|||\*|||:|||||\*|||  
Sbjct: 716 AGAAGAAAAAGAAGAAGAAGAAG 694  
>novel\_mir\_67 Score: 2.2 R03G\_13954  
Query: 1 TACAGCGGCTTCTTTCAGACTT 22  
|\*||:|||||\*|||:  
Sbjct: 651 AAGTTGCCGAAGAAAGTGTGAG 630  
>novel\_mir\_67 Score: 0.5 R03G\_08467  
Query: 1 TACAGCGGCTTCTTTCAGACTT 22  
|||||:|||||  
Sbjct: 811 ATGTCGCTGAAGAAAGTCTGAA 790  
>novel\_mir\_67 Score: 0.0 R03G\_07834  
Query: 1 TACAGCGGCTTCTTTCAGACTT 22  
|||||:|||||  
Sbjct: 1171 ATGTCGCCGAAGAAAGTCTGAA 1150  
>novel\_mir\_122 Score: 2.2 R03G\_17256  
Query: 1 TGCATCTGCTGCTGCTGTTG 20  
|||\*\*|||:||  
Sbjct: 362 ACGACGACGACGACGACGAC 343  
>novel\_mir\_122 Score: 2.2 R03G\_17248  
Query: 1 TGCATCTGCTGCTGCTGTTG 20  
|||\*\*|||:||  
Sbjct: 368 ACGACGACGACGACGACGAC 349  
>novel\_mir\_122 Score: 2.5 R03G\_17074  
Query: 1 TGCATCTGCTGCTGCTGTTG 20  
|||\*\*|||:|:  
Sbjct: 235 ACGACGACGACGACGACGAT 216  
>novel\_mir\_122 Score: 2.2 R03G\_16748  
Query: 1 TGCATCTGCTGCTGCTGTTG 20  
|||\*\*|||:||  
Sbjct: 338 ACGACGACGACGACGACGAC 319  
>novel\_mir\_122 Score: 0.0 R03G\_16618  
Query: 1 TGCATCTGCTGCTGCTGTTG 20

|||||  
Sbjct: 2282 ACGTAGACGACGACGACAAC 2263  
>novel\_mir\_122 Score: 2.0 R03G\_16404  
Query: 1 TGCATCTGCTGCTGCTGTTG 20  
|||\*\*|||  
Sbjct: 677 ACGACGACGACGACGACAAC 658  
>novel\_mir\_122 Score: 2.2 R03G\_16137  
Query: 1 TGCATCTGCTGCTGCTGTTG 20  
|||\*\*|||:|  
Sbjct: 362 ACGACGACGACGACGACGAC 343  
>novel\_mir\_122 Score: 2.0 R03G\_16262  
Query: 1 TGCATCTGCTGCTGCTGTTG 20  
|||\*\*|||  
Sbjct: 178 ACGACGACGACGACGACAAC 159  
>novel\_mir\_122 Score: 1.2 R03G\_16322  
Query: 1 TGCATCTGCTGCTGCTGTTG 20  
:|\*|||  
Sbjct: 809 GCGAAGACGACGACGACAAC 790  
>novel\_mir\_122 Score: 2.2 R03G\_16337  
Query: 1 TGCATCTGCTGCTGCTGTTG 20  
|||\*\*|||:|  
Sbjct: 902 ACGACGACGACGACGACGAC 883  
>novel\_mir\_122 Score: 2.2 R03G\_15890  
Query: 1 TGCATCTGCTGCTGCTGTTG 20  
|||\*\*|||:|  
Sbjct: 362 ACGACGACGACGACGACGAC 343  
>novel\_mir\_122 Score: 2.2 R03G\_15897  
Query: 1 TGCATCTGCTGCTGCTGTTG 20  
|||\*\*|||:|  
Sbjct: 338 ACGACGACGACGACGACGAC 319  
>novel\_mir\_122 Score: 2.2 R03G\_15919  
Query: 1 TGCATCTGCTGCTGCTGTTG 20  
|||\*\*|||:|  
Sbjct: 827 ACGACGACGACGACGACGAC 808  
>novel\_mir\_122 Score: 2.2 R03G\_15986  
Query: 1 TGCATCTGCTGCTGCTGTTG 20  
|||\*\*|||:|  
Sbjct: 1631 ACGACGACGACGACGACGAC 1612  
>novel\_mir\_122 Score: 2.0 R03G\_15357  
Query: 1 TGCATCTGCTGCTGCTGTTG 20  
|||\*\*|||  
Sbjct: 1074 ACGACGACGACGACGACAAC 1055  
>novel\_mir\_122 Score: 2.2 R03G\_15422  
Query: 1 TGCATCTGCTGCTGCTGTTG 20  
|||\*\*|||:|

Sbjct: 1255 ACGACGACGACGACGACAGC 1236  
>novel\_mir\_122 Score: 2.5 R03G\_14833  
Query: 1 TGCATCTGCTGCTGCTGTTG 20  
\*\*||:|||||||||||:|:  
Sbjct: 870 TGGTGGACGACGACGACGAT 851  
>novel\_mir\_122 Score: 2.5 R03G\_15039  
Query: 1 TGCATCTGCTGCTGCTGTTG 20  
|||\*\*|||||||||||:|:  
Sbjct: 757 ACGATGACGACGACGACGAT 738  
>novel\_mir\_122 Score: 2.2 R03G\_14409  
Query: 1 TGCATCTGCTGCTGCTGTTG 20  
|||\*\*|||||||||||:|  
Sbjct: 722 ACGACGACGACGACGACGAC 703  
>novel\_mir\_122 Score: 2.2 R03G\_14420  
Query: 1 TGCATCTGCTGCTGCTGTTG 20  
|||\*\*|||||||||||:|  
Sbjct: 1397 ACGACGACGACGACGACGAC 1378  
>novel\_mir\_122 Score: 2.2 R03G\_14551  
Query: 1 TGCATCTGCTGCTGCTGTTG 20  
|||\*\*|||||||||||:|  
Sbjct: 338 ACGACGACGACGACGACGAC 319  
>novel\_mir\_122 Score: 2.2 R03G\_14665  
Query: 1 TGCATCTGCTGCTGCTGTTG 20  
|||\*\*|||||||||||:|  
Sbjct: 1034 ACGACGACGACGACGACGAC 1015  
>novel\_mir\_122 Score: 2.2 R03G\_14665  
Query: 1 TGCATCTGCTGCTGCTGTTG 20  
|||\*\*|||||||||||:|  
Sbjct: 891 ACGACGACGACGACGACGAC 872  
>novel\_mir\_122 Score: 2.2 R03G\_14008  
Query: 1 TGCATCTGCTGCTGCTGTTG 20  
|||\*\*|||||||||||:|  
Sbjct: 688 ACGACGACGACGACGACGAC 669  
>novel\_mir\_122 Score: 2.5 R03G\_14008  
Query: 1 TGCATCTGCTGCTGCTGTTG 20  
|||\*\*|||||||||||:|:  
Sbjct: 610 ACGATGACGACGACGACGAT 591  
>novel\_mir\_122 Score: 2.2 R03G\_14008  
Query: 1 TGCATCTGCTGCTGCTGTTG 20  
|||\*\*|||||||||||:|  
Sbjct: 520 ACGATGACGACGACGACGAC 501  
>novel\_mir\_122 Score: 2.2 R03G\_14199  
Query: 1 TGCATCTGCTGCTGCTGTTG 20  
|||\*\*|||||||||||:|  
Sbjct: 3398 ACGACGACGACGACGACGAC 3379

>novel\_mir\_122 Score: 2.2 R03G\_14199  
Query: 1 TGCATCTGCTGCTGCTGTTG 20  
|||\*\*|||||||||||||:|  
Sbjct: 3329 ACGACGACGACGACGACGAC 3310  
>novel\_mir\_122 Score: 2.0 R03G\_14274  
Query: 1 TGCATCTGCTGCTGCTGTTG 20  
|||\*\*|||||||||||||  
Sbjct: 245 ACGACGACGACGACGACAAC 226  
>novel\_mir\_122 Score: 2.2 R03G\_13348  
Query: 1 TGCATCTGCTGCTGCTGTTG 20  
|||\*\*|||||||||||||:|  
Sbjct: 429 ACGACGACGACGACGACGAC 410  
>novel\_mir\_122 Score: 2.5 R03G\_13425  
Query: 1 TGCATCTGCTGCTGCTGTTG 20  
|:|\*||:|||||||||:|:  
Sbjct: 1807 ATGTTGATGACGACGACGAT 1788  
>novel\_mir\_122 Score: 2.5 R03G\_13611  
Query: 1 TGCATCTGCTGCTGCTGTTG 20  
|||\*\*|||||||||||||:|  
Sbjct: 759 ACGACGACGACGACGACGGC 740  
>novel\_mir\_122 Score: 2.0 R03G\_13648  
Query: 1 TGCATCTGCTGCTGCTGTTG 20  
||\*\*|||||||||||||  
Sbjct: 737 ACTGAGACGACGACGACAAC 718  
>novel\_mir\_122 Score: 1.8 R03G\_12743  
Query: 1 TGCATCTGCTGCTGCTGTTG 20  
||\*|||||||||||||:|\*  
Sbjct: 584 ACTTAGACGACGACGACGAG 565  
>novel\_mir\_122 Score: 2.5 R03G\_12895  
Query: 1 TGCATCTGCTGCTGCTGTTG 20  
\*||\*\*|||||||||||||  
Sbjct: 722 CCACAGACGACGACGACAAC 703  
>novel\_mir\_122 Score: 2.0 R03G\_12904  
Query: 1 TGCATCTGCTGCTGCTGTTG 20  
|||\*\*|||||||||||||  
Sbjct: 839 ACGACGACGACGACGACAAC 820  
>novel\_mir\_122 Score: 2.2 R03G\_13062  
Query: 1 TGCATCTGCTGCTGCTGTTG 20  
:|\*|||||||||||||:|\*:  
Sbjct: 89 GCGGAGACGACGACGACGTT 70  
>novel\_mir\_122 Score: 2.2 R03G\_13146  
Query: 1 TGCATCTGCTGCTGCTGTTG 20  
|||\*\*|||||||||||||:|  
Sbjct: 362 ACGACGACGACGACGACGAC 343  
>novel\_mir\_122 Score: 2.5 R03G\_13230

Query: 1 TGCATCTGCTGCTGCTGTTG 20  
||\*|:|:|||||||\*||  
Sbjct: 70 ACTTGATGACGACGACTAC 51  
>novel\_mir\_122 Score: 2.2 R03G\_11977  
Query: 1 TGCATCTGCTGCTGCTGTTG 20  
|||\*\*|||||||:|  
Sbjct: 302 ACGACGACGACGACGAC 283  
>novel\_mir\_122 Score: 2.2 R03G\_12090  
Query: 1 TGCATCTGCTGCTGCTGTTG 20  
\*:\*|:|:|||||||\*||  
Sbjct: 1632 TTGAAGACGACGACGAC 1613  
>novel\_mir\_122 Score: 2.5 R03G\_12158  
Query: 1 TGCATCTGCTGCTGCTGTTG 20  
|||\*\*|||||||:|:  
Sbjct: 219 ACGACGACGACGACGACGAT 200  
>novel\_mir\_122 Score: 2.2 R03G\_12347  
Query: 1 TGCATCTGCTGCTGCTGTTG 20  
|||\*\*|||||||:|  
Sbjct: 311 ACGACGACGACGACGACGAC 292  
>novel\_mir\_122 Score: 2.5 R03G\_12347  
Query: 1 TGCATCTGCTGCTGCTGTTG 20  
\*\*|:|:|||||||\*|||  
Sbjct: 221 TAGTAGACGACGACTACAAC 202  
>novel\_mir\_122 Score: 2.5 R03G\_11114  
Query: 1 TGCATCTGCTGCTGCTGTTG 20  
||||\*|:|:|||||||\*::  
Sbjct: 390 ACGTAAATGACGACGAC-GT 372  
>novel\_mir\_122 Score: 2.0 R03G\_11158  
Query: 1 TGCATCTGCTGCTGCTGTTG 20  
|||\*\*|||||||:|  
Sbjct: 74 ACGACGACGACGACGACAAC 55  
>novel\_mir\_122 Score: 2.2 R03G\_11166  
Query: 1 TGCATCTGCTGCTGCTGTTG 20  
|||\*\*|||||||:|  
Sbjct: 590 ACGACGACGACGACGACGAC 571  
>novel\_mir\_122 Score: 2.2 R03G\_11166  
Query: 1 TGCATCTGCTGCTGCTGTTG 20  
|||\*\*|||||||:|  
Sbjct: 524 ACGTTAACGACGACGACGAC 505  
>novel\_mir\_122 Score: 2.2 R03G\_11236  
Query: 1 TGCATCTGCTGCTGCTGTTG 20  
|||\*\*|||||||:|  
Sbjct: 380 ACGACGACGACGACGACGAC 361  
>novel\_mir\_122 Score: 2.2 R03G\_11253  
Query: 1 TGCATCTGCTGCTGCTGTTG 20



|||\*\*|||||||:|  
Sbjct: 465 ACGATGACGACGACGACGAC 446  
>novel\_mir\_122 Score: 2.2 R03G\_11464  
Query: 1 TGCATCTGCTGCTGCTGTTG 20  
\*|||||||\*\*:  
Sbjct: 641 TCGTAGACGACGACGAGTGC 622  
>novel\_mir\_122 Score: 2.2 R03G\_11507  
Query: 1 TGCATCTGCTGCTGCTGTTG 20  
|||\*\*|||||||:|  
Sbjct: 591 ACGACGACGACGACGACGAC 572  
>novel\_mir\_122 Score: 2.2 R03G\_11537  
Query: 1 TGCATCTGCTGCTGCTGTTG 20  
|||\*\*|||||||:|  
Sbjct: 380 ACGACGACGACGACGACGAC 361  
>novel\_mir\_122 Score: 2.0 R03G\_11868  
Query: 1 TGCATCTGCTGCTGCTGTTG 20  
|||\*\*|||||||:|  
Sbjct: 1664 ACGACGACGACGACGACAAC 1645  
>novel\_mir\_122 Score: 2.2 R03G\_11907  
Query: 1 TGCATCTGCTGCTGCTGTTG 20  
|||\*\*|||||||:|  
Sbjct: 221 ACGACGACGACGACGACGAC 202  
>novel\_mir\_122 Score: 2.2 R03G\_10309  
Query: 1 TGCATCTGCTGCTGCTGTTG 20  
|||\*\*|||||||:|  
Sbjct: 602 ACGACGACGACGACGACGAC 583  
>novel\_mir\_122 Score: 2.0 R03G\_10396  
Query: 1 TGCATCTGCTGCTGCTGTTG 20  
|||\*\*|||||||:|  
Sbjct: 431 ACGACGACGACGACGACAAC 412  
>novel\_mir\_122 Score: 2.5 R03G\_10401  
Query: 1 TGCATCTGCTGCTGCTGTTG 20  
||||\*||||||\*|||\*|  
Sbjct: 1814 ACGTAAACGACGACAACATC 1795  
>novel\_mir\_122 Score: 2.5 R03G\_10568  
Query: 1 TGCATCTGCTGCTGCTGTTG 20  
\*:||\*|||||||:||||  
Sbjct: 2013 TTGTCGACGACGACGGCAAC 1994  
>novel\_mir\_122 Score: 2.0 R03G\_10815  
Query: 1 TGCATCTGCTGCTGCTGTTG 20  
|||\*\*|||||||:|  
Sbjct: 2600 ACGACGACGACGACGACAAC 2581  
>novel\_mir\_122 Score: 2.5 R03G\_10815  
Query: 1 TGCATCTGCTGCTGCTGTTG 20  
\*||||||\*\*|||||||

Sbjct: 2438 CCGTAGAAAACGACGACAAC 2419  
>novel\_mir\_122 Score: 2.0 R03G\_10831  
Query: 1 TGCATCTGCTGCTGCTGTTG 20  
|||\*\*|||||||||||||||

Sbjct: 1109 ACGACGACGACGACGACAAC 1090  
>novel\_mir\_122 Score: 2.0 R03G\_10851  
Query: 1 TGCATCTGCTGCTGCTGTTG 20  
|||\*\*|||||||||||||||

Sbjct: 356 ACGACGACGACGACGACAAC 337  
>novel\_mir\_122 Score: 2.2 R03G\_10926  
Query: 1 TGCATCTGCTGCTGCTGTTG 20  
|||\*\*||:|||||||:|\*

Sbjct: 880 ACGTTGATGACGACGACGAA 861  
>novel\_mir\_122 Score: 2.2 R03G\_09602  
Query: 1 TGCATCTGCTGCTGCTGTTG 20  
|||\*\*||||||||||||||:|

Sbjct: 338 ACGACGACGACGACGACGAC 319  
>novel\_mir\_122 Score: 2.2 R03G\_09603  
Query: 1 TGCATCTGCTGCTGCTGTTG 20  
|||\*\*||||||||||||||:|

Sbjct: 380 ACGACGACGACGACGACGAC 361  
>novel\_mir\_122 Score: 2.0 R03G\_09721  
Query: 1 TGCATCTGCTGCTGCTGTTG 20  
|||\*\*|||||||||||||||

Sbjct: 620 ACGACGACGACGACGACAAC 601  
>novel\_mir\_122 Score: 2.2 R03G\_09929  
Query: 1 TGCATCTGCTGCTGCTGTTG 20  
|||\*\*||||||||||||||:|

Sbjct: 338 ACGACGACGACGACGACGAC 319  
>novel\_mir\_122 Score: 2.2 R03G\_10041  
Query: 1 TGCATCTGCTGCTGCTGTTG 20  
|||\*\*||||||||||||||:|

Sbjct: 368 ACGACGACGACGACGACGAC 349  
>novel\_mir\_122 Score: 2.2 R03G\_10199  
Query: 1 TGCATCTGCTGCTGCTGTTG 20  
\*|||\*||||||||||||||:|\*

Sbjct: 57 TCGTCGACGACGACGACGTC 38  
>novel\_mir\_122 Score: 2.2 R03G\_07981  
Query: 1 TGCATCTGCTGCTGCTGTTG 20  
|||\*\*||||||||||||||:|

Sbjct: 338 ACGACGACGACGACGACGAC 319  
>novel\_mir\_122 Score: 2.5 R03G\_08102  
Query: 1 TGCATCTGCTGCTGCTGTTG 20  
:\*||||||:|||||:|:|

Sbjct: 861 GAGTAGACGGCGACGGCGAC 842

>novel\_mir\_122 Score: 2.2 R03G\_08359  
Query: 1 TGCATCTGCTGCTGCTGTTG 20  
|||\*\*|||||||||||:|  
Sbjct: 1119 ACGACGACGACGACGACGAC 1100  
>novel\_mir\_122 Score: 2.5 R03G\_08704  
Query: 1 TGCATCTGCTGCTGCTGTTG 20  
||\*|||\*|||||||||||:|  
Sbjct: 1980 ACATCGACGACGACGACGGC 1961  
>novel\_mir\_122 Score: 2.2 R03G\_08727  
Query: 1 TGCATCTGCTGCTGCTGTTG 20  
|||\*\*|||||||||||:|  
Sbjct: 122 ACGACGACGACGACGACGAC 103  
>novel\_mir\_122 Score: 2.0 R03G\_08774  
Query: 1 TGCATCTGCTGCTGCTGTTG 20  
|||\*\*|||||||||||  
Sbjct: 245 ACGACGACGACGACGACAAC 226  
>novel\_mir\_122 Score: 2.2 R03G\_08784  
Query: 1 TGCATCTGCTGCTGCTGTTG 20  
|||\*\*|||||||||||:|  
Sbjct: 666 ACGACGACGACGACGACGAC 647  
>novel\_mir\_122 Score: 2.2 R03G\_08982  
Query: 1 TGCATCTGCTGCTGCTGTTG 20  
|||\*\*|||||||||||:|  
Sbjct: 275 ACGACGACGACGACGACGAC 256  
>novel\_mir\_122 Score: 2.5 R03G\_08982  
Query: 1 TGCATCTGCTGCTGCTGTTG 20  
\*||\*\*|||||||||||  
Sbjct: 104 CCGACGACGACGACGACAAC 85  
>novel\_mir\_122 Score: 2.0 R03G\_09029  
Query: 1 TGCATCTGCTGCTGCTGTTG 20  
|||\*\*|||||||||||  
Sbjct: 2351 ACGACGACGACGACGACAAC 2332  
>novel\_mir\_122 Score: 2.0 R03G\_09085  
Query: 1 TGCATCTGCTGCTGCTGTTG 20  
|||\*\*|||||||||||  
Sbjct: 821 ACGACGACGACGACGACAAC 802  
>novel\_mir\_122 Score: 2.5 R03G\_09129  
Query: 1 TGCATCTGCTGCTGCTGTTG 20  
|\*|||||\*|||||\*|  
Sbjct: 762 AGGTAGACGAGGACGACATC 743  
>novel\_mir\_122 Score: 2.2 R03G\_09182  
Query: 1 TGCATCTGCTGCTGCTGTTG 20  
|||\*\*|||||||||||:|  
Sbjct: 344 ACGACGACGACGACGACGAC 325  
>novel\_mir\_122 Score: 2.2 R03G\_06730

Query: 1 TGCATCTGCTGCTGCTGTTG 20  
|||\*\*|||||||:|  
Sbjct: 338 ACGACGACGACGACGACGAC 319  
>novel\_mir\_122 Score: 2.0 R03G\_06990  
Query: 1 TGCATCTGCTGCTGCTGTTG 20  
|||\*|||\*|||||||  
Sbjct: 311 ACGTCGACAACGACGACAAC 292  
>novel\_mir\_122 Score: 2.2 R03G\_07012  
Query: 1 TGCATCTGCTGCTGCTGTTG 20  
|||\*\*|||||||:|  
Sbjct: 569 ACGACGACGACGACGACGAC 550  
>novel\_mir\_122 Score: 2.5 R03G\_07164  
Query: 1 TGCATCTGCTGCTGCTGTTG 20  
||\*|:|||||\*|||||||  
Sbjct: 1178 ACTTGGACGACAACGACAAC 1159  
>novel\_mir\_122 Score: 2.0 R03G\_07234  
Query: 1 TGCATCTGCTGCTGCTGTTG 20  
|||\*\*|||||||:|  
Sbjct: 311 ACGACGACGACGACGACAAC 292  
>novel\_mir\_122 Score: 2.2 R03G\_07266  
Query: 1 TGCATCTGCTGCTGCTGTTG 20  
|||\*\*|||||||:|  
Sbjct: 2472 ACGACGACGACGACGACGAC 2453  
>novel\_mir\_122 Score: 2.5 R03G\_07281  
Query: 1 TGCATCTGCTGCTGCTGTTG 20  
|||\*\*|||||||:|  
Sbjct: 453 ACGACGACGACGACGGCAAC 434  
>novel\_mir\_122 Score: 2.2 R03G\_07306  
Query: 1 TGCATCTGCTGCTGCTGTTG 20  
|||\*\*|||||||:|  
Sbjct: 338 ACGACGACGACGACGACGAC 319  
>novel\_mir\_122 Score: 2.0 R03G\_07466  
Query: 1 TGCATCTGCTGCTGCTGTTG 20  
|||\*\*|||||||:|  
Sbjct: 1760 ACGACGACGACGACGACAAC 1741  
>novel\_mir\_122 Score: 2.2 R03G\_07696  
Query: 1 TGCATCTGCTGCTGCTGTTG 20  
|||\*\*|||||||:|  
Sbjct: 338 ACGACGACGACGACGACGAC 319  
>novel\_mir\_122 Score: 2.2 R03G\_07720  
Query: 1 TGCATCTGCTGCTGCTGTTG 20  
|||\*\*|||||||:|  
Sbjct: 338 ACGACGACGACGACGACGAC 319  
>novel\_mir\_122 Score: 2.2 R03G\_07738  
Query: 1 TGCATCTGCTGCTGCTGTTG 20

|||\*\*|||||||:|  
Sbjct: 380 ACGACGACGACGACGACGAC 361  
>novel\_mir\_122 Score: 2.0 R03G\_07933  
Query: 1 TGCATCTGCTGCTGCTGTTG 20  
|||\*\*|||||||  
Sbjct: 437 ACGACGACGACGACGACAAC 418  
>novel\_mir\_122 Score: 2.0 R03G\_07933  
Query: 1 TGCATCTGCTGCTGCTGTTG 20  
|||\*\*|||||||  
Sbjct: 365 ACGACGACGACGACGACAAC 346  
>novel\_mir\_122 Score: 2.0 R03G\_05582  
Query: 1 TGCATCTGCTGCTGCTGTTG 20  
|||\*\*|||||||  
Sbjct: 794 ACGACGACGACGACGACAAC 775  
>novel\_mir\_122 Score: 2.2 R03G\_05586  
Query: 1 TGCATCTGCTGCTGCTGTTG 20  
|||\*\*|||||||:|  
Sbjct: 743 ACGACGACGACGACGACGAC 724  
>novel\_mir\_122 Score: 2.5 R03G\_05593  
Query: 1 TGCATCTGCTGCTGCTGTTG 20  
:|\*|||||||:|  
Sbjct: 7464 GTGTTGACGACGACGATGAC 7445  
>novel\_mir\_122 Score: 2.5 R03G\_06078  
Query: 1 TGCATCTGCTGCTGCTGTTG 20  
\*\*|||\*|||||||  
Sbjct: 1958 TAGTACACGACGACGACAAC 1939  
>novel\_mir\_122 Score: 2.5 R03G\_06139  
Query: 1 TGCATCTGCTGCTGCTGTTG 20  
:||||\*||||\*||||:|  
Sbjct: 566 GCGTAAACGACAACGACGAC 547  
>novel\_mir\_122 Score: 2.5 R03G\_06155  
Query: 1 TGCATCTGCTGCTGCTGTTG 20  
|||\*\*|||||||\*  
Sbjct: 299 ACGACGACGACGACGACAAA 280  
>novel\_mir\_122 Score: 2.5 R03G\_06190  
Query: 1 TGCATCTGCTGCTGCTGTTG 20  
\*||\*\*|||||||  
Sbjct: 864 CCGACGACGACGACGACAAC 845  
>novel\_mir\_122 Score: 2.5 R03G\_06225  
Query: 1 TGCATCTGCTGCTGCTGTTG 20  
||||\*||\*|||||||\*  
Sbjct: 4526 ACGTAAACAACGACGACAAA 4507  
>novel\_mir\_122 Score: 2.0 R03G\_06238  
Query: 1 TGCATCTGCTGCTGCTGTTG 20  
|||\*\*|||||||

Sbjct: 749 ACGACGACGACGACGACAAC 730  
>novel\_mir\_122 Score: 2.5 R03G\_06536  
Query: 1 TGCATCTGCTGCTGCTGTTG 20  
|||\*\*||||||||||||\*||  
Sbjct: 440 ACGACGACGACGACGACTAC 421  
>novel\_mir\_122 Score: 2.0 R03G\_06599  
Query: 1 TGCATCTGCTGCTGCTGTTG 20  
|||\*\*|||||||||||||||  
Sbjct: 401 ACGACGACGACGACGACAAC 382  
>novel\_mir\_122 Score: 2.2 R03G\_06612  
Query: 1 TGCATCTGCTGCTGCTGTTG 20  
||||\*||||\*|||||:|  
Sbjct: 1428 ACGTTGACGAGGACGACGAC 1409  
>novel\_mir\_122 Score: 2.2 R03G\_06631  
Query: 1 TGCATCTGCTGCTGCTGTTG 20  
|||\*\*|||||||||||||:|  
Sbjct: 3156 ACGACGACGACGACGACGAC 3137  
>novel\_mir\_122 Score: 2.0 R03G\_06631  
Query: 1 TGCATCTGCTGCTGCTGTTG 20  
|||\*\*|||||||||||||||  
Sbjct: 2993 ACGACGACGACGACGACAAC 2974  
>novel\_mir\_122 Score: 2.0 R03G\_06665  
Query: 1 TGCATCTGCTGCTGCTGTTG 20  
|||\*\*|||||||||||||||  
Sbjct: 746 ACGACGACGACGACGACAAC 727  
>novel\_mir\_122 Score: 2.2 R03G\_04287  
Query: 1 TGCATCTGCTGCTGCTGTTG 20  
|||\*\*|||||||||||||:|  
Sbjct: 1790 ACGACGACGACGACGACGAC 1771  
>novel\_mir\_122 Score: 2.2 R03G\_04325  
Query: 1 TGCATCTGCTGCTGCTGTTG 20  
|||\*\*|||||||||||||:|  
Sbjct: 668 ACGACGACGACGACGACGAC 649  
>novel\_mir\_122 Score: 2.5 R03G\_04345  
Query: 1 TGCATCTGCTGCTGCTGTTG 20  
\*|||||\*|||||||:\*\|  
Sbjct: 3009 TCGTAGAAGACGACGAT-AC 2991  
>novel\_mir\_122 Score: 2.0 R03G\_04522  
Query: 1 TGCATCTGCTGCTGCTGTTG 20  
||\*\*|||||||||||||||  
Sbjct: 1565 ACACAGACGACGACGACAAC 1546  
>novel\_mir\_122 Score: 2.0 R03G\_04562  
Query: 1 TGCATCTGCTGCTGCTGTTG 20  
|||\*\*|||||||||||||||  
Sbjct: 2228 ACGACGACGACGACGACAAC 2209

>novel\_mir\_122 Score: 2.5 R03G\_04575  
Query: 1 TGCATCTGCTGCTGCTGTTG 20  
|||\*\*|||||||:|:  
Sbjct: 148 ACGACGACGACGACGACGAT 129  
>novel\_mir\_122 Score: 2.0 R03G\_04604  
Query: 1 TGCATCTGCTGCTGCTGTTG 20  
|||\*\*|||||||  
Sbjct: 151 ACGACGACGACGACGACAAC 132  
>novel\_mir\_122 Score: 2.2 R03G\_04679  
Query: 1 TGCATCTGCTGCTGCTGTTG 20  
|||\*\*|||||||:|  
Sbjct: 308 ACGACGACGACGACGACGAC 289  
>novel\_mir\_122 Score: 1.8 R03G\_04733  
Query: 1 TGCATCTGCTGCTGCTGTTG 20  
|\*||:|||||||:|  
Sbjct: 1310 AGGTGGACGACGACGACGAC 1291  
>novel\_mir\_122 Score: 2.0 R03G\_05007  
Query: 1 TGCATCTGCTGCTGCTGTTG 20  
|\*|||:|||||||\*|  
Sbjct: 1416 AAGTAGGCGACGACGACATC 1397  
>novel\_mir\_122 Score: 2.0 R03G\_05230  
Query: 1 TGCATCTGCTGCTGCTGTTG 20  
|||\*\*|||||||  
Sbjct: 3539 ACGACGACGACGACGACAAC 3520  
>novel\_mir\_122 Score: 2.2 R03G\_05308  
Query: 1 TGCATCTGCTGCTGCTGTTG 20  
|||\*\*|||||||:|  
Sbjct: 1469 ACGACGACGACGACGACGAC 1450  
>novel\_mir\_122 Score: 2.0 R03G\_05396  
Query: 1 TGCATCTGCTGCTGCTGTTG 20  
|||\*\*|||||||  
Sbjct: 1370 ACGACGACGACGACGACAAC 1351  
>novel\_mir\_122 Score: 2.5 R03G\_05396  
Query: 1 TGCATCTGCTGCTGCTGTTG 20  
\*|||\*||\*|||||||  
Sbjct: 719 TCGTAAACAACGACGACAAC 700  
>novel\_mir\_122 Score: 1.8 R03G\_05425  
Query: 1 TGCATCTGCTGCTGCTGTTG 20  
|||\*|||||||:|\*|  
Sbjct: 365 ACGAAGACGACGACGACGTC 346  
>novel\_mir\_122 Score: 2.2 R03G\_02228  
Query: 1 TGCATCTGCTGCTGCTGTTG 20  
|||\*\*|||||||:|  
Sbjct: 338 ACGACGACGACGACGACGAC 319  
>novel\_mir\_122 Score: 2.0 R03G\_02252

Query: 1 TGCATCTGCTGCTGCTGTTG 20  
|||\*\*||||||||||||||  
Sbjct: 350 ACGACGACGACGACGACAAC 331  
>novel\_mir\_122 Score: 2.5 R03G\_02434  
Query: 1 TGCATCTGCTGCTGCTGTTG 20  
\*|\*||\*||||||||||||||  
Sbjct: 251 CCATAAACGACGACGACAAC 232  
>novel\_mir\_122 Score: 2.0 R03G\_02518  
Query: 1 TGCATCTGCTGCTGCTGTTG 20  
|||\*\*||||||||||||||  
Sbjct: 539 ACGACGACGACGACGACAAC 520  
>novel\_mir\_122 Score: 2.2 R03G\_03130  
Query: 1 TGCATCTGCTGCTGCTGTTG 20  
|||\*\*||||||||||||||:|  
Sbjct: 41 ACGACGACGACGACGACGAC 22  
>novel\_mir\_122 Score: 2.2 R03G\_03212  
Query: 1 TGCATCTGCTGCTGCTGTTG 20  
||\*|\*||||||||||||||:|  
Sbjct: 179 ACATTGACGACGACGACGAC 160  
>novel\_mir\_122 Score: 2.2 R03G\_03219  
Query: 1 TGCATCTGCTGCTGCTGTTG 20  
|||\*\*||||||||||||||:|  
Sbjct: 828 ACGACGACGACGACGACGAC 809  
>novel\_mir\_122 Score: 2.0 R03G\_03416  
Query: 1 TGCATCTGCTGCTGCTGTTG 20  
|||:|\*||||||||||\*  
Sbjct: 900 ACGTAGATCACGACGACAAG 881  
>novel\_mir\_122 Score: 2.2 R03G\_03584  
Query: 1 TGCATCTGCTGCTGCTGTTG 20  
|||\*\*||||||||||||||:|  
Sbjct: 296 ACGACGACGACGACGACGAC 277  
>novel\_mir\_122 Score: 2.0 R03G\_03857  
Query: 1 TGCATCTGCTGCTGCTGTTG 20  
|||\*\*||||||||||||||  
Sbjct: 440 ACGACGACGACGACGACAAC 421  
>novel\_mir\_122 Score: 1.2 R03G\_04003  
Query: 1 TGCATCTGCTGCTGCTGTTG 20  
||\*|\*||||||||||||||:|  
Sbjct: 1898 ACTTAGACGACGACGACGAC 1879  
>novel\_mir\_122 Score: 2.5 R03G\_04003  
Query: 1 TGCATCTGCTGCTGCTGTTG 20  
\*|\*|\*|\*||||||||||||||  
Sbjct: 1103 TCGAAAACGACGACGACAAC 1084  
>novel\_mir\_122 Score: 2.2 R03G\_04211  
Query: 1 TGCATCTGCTGCTGCTGTTG 20



|||\*\*|||||||:|  
Sbjct: 338 ACGACGACGACGACGACGAC 319  
>novel\_mir\_122 Score: 2.0 R03G\_00028  
Query: 1 TGCATCTGCTGCTGCTGTTG 20  
|||\*\*|||||||  
Sbjct: 392 ACGACGACGACGACGACAAC 373  
>novel\_mir\_122 Score: 0.0 R03G\_00202  
Query: 1 TGCATCTGCTGCTGCTGTTG 20  
|||||||  
Sbjct: 600 ACGTAGACGACGACGACAAC 581  
>novel\_mir\_122 Score: 2.5 R03G\_00219  
Query: 1 TGCATCTGCTGCTGCTGTTG 20  
|||\*\*|||||||\*|  
Sbjct: 1973 ACGACGACGACGACGACATC 1954  
>novel\_mir\_122 Score: 2.2 R03G\_00288  
Query: 1 TGCATCTGCTGCTGCTGTTG 20  
|||\*\*|||||||:|  
Sbjct: 356 ACGACGACGACGACGACGAC 337  
>novel\_mir\_122 Score: 2.0 R03G\_00357  
Query: 1 TGCATCTGCTGCTGCTGTTG 20  
|||\*\*|||||||  
Sbjct: 398 ACGACGACGACGACGACAAC 379  
>novel\_mir\_122 Score: 2.0 R03G\_00501  
Query: 1 TGCATCTGCTGCTGCTGTTG 20  
|||\*\*|||||||  
Sbjct: 122 ACGACGACGACGACGACAAC 103  
>novel\_mir\_122 Score: 2.2 R03G\_00578  
Query: 1 TGCATCTGCTGCTGCTGTTG 20  
|||\*\*|||||||:|  
Sbjct: 1355 ACGACGACGACGACGACGAC 1336  
>novel\_mir\_122 Score: 2.2 R03G\_00600  
Query: 1 TGCATCTGCTGCTGCTGTTG 20  
:||\*\*|||||||  
Sbjct: 287 GCGACGACGACGACGACAAC 268  
>novel\_mir\_122 Score: 2.0 R03G\_00640  
Query: 1 TGCATCTGCTGCTGCTGTTG 20  
|||\*\*|||||||  
Sbjct: 1361 ACGACGACGACGACGACAAC 1342  
>novel\_mir\_122 Score: 2.0 R03G\_00640  
Query: 1 TGCATCTGCTGCTGCTGTTG 20  
|||\*\*|||||||  
Sbjct: 1337 ACGACGACGACGACGACAAC 1318  
>novel\_mir\_122 Score: 1.8 R03G\_00640  
Query: 1 TGCATCTGCTGCTGCTGTTG 20  
\*\*|||||||:|

Sbjct: 1259 TAGTAGACGACGACGACGAC 1240  
>novel\_mir\_122 Score: 2.0 R03G\_00729  
Query: 1 TGCATCTGCTGCTGCTGTTG 20  
|||\*\*|||||||||||||||

Sbjct: 959 ACGACGACGACGACGACAAC 940  
>novel\_mir\_122 Score: 2.0 R03G\_01092  
Query: 1 TGCATCTGCTGCTGCTGTTG 20  
||||||||||\*||\*|||||

Sbjct: 482 ACGTAGACGACAACAACAAC 463  
>novel\_mir\_122 Score: 2.0 R03G\_01361  
Query: 1 TGCATCTGCTGCTGCTGTTG 20  
|||\*\*|||||||||||||||

Sbjct: 479 ACGACGACGACGACGACAAC 460  
>novel\_mir\_122 Score: 2.5 R03G\_01693  
Query: 1 TGCATCTGCTGCTGCTGTTG 20  
\*||\*||||\*|||||||||||

Sbjct: 1265 TCATAGACAACGACGACAAC 1246  
>novel\_mir\_122 Score: 2.2 R03G\_01726  
Query: 1 TGCATCTGCTGCTGCTGTTG 20  
|||\*\*|||||||||||||:|

Sbjct: 380 ACGACGACGACGACGACGAC 361  
>novel\_mir\_122 Score: 2.0 R03G\_01791  
Query: 1 TGCATCTGCTGCTGCTGTTG 20  
|||\*\*|||||||||||||||

Sbjct: 189 ACGACGACGACGACGACAAC 170  
>novel\_mir\_122 Score: 2.0 R03G\_01899  
Query: 1 TGCATCTGCTGCTGCTGTTG 20  
|||\*\*|||||||||||||||

Sbjct: 89 ACGACGACGACGACGACAAC 70  
>novel\_mir\_122 Score: 2.0 R03G\_02027  
Query: 1 TGCATCTGCTGCTGCTGTTG 20  
|||\*\*|||||||||||||||

Sbjct: 653 ACGACGACGACGACGACAAC 634  
>novel\_mir\_122 Score: 2.5 R03G\_02180  
Query: 1 TGCATCTGCTGCTGCTGTTG 20  
||\*|:\*|||||||||||||||

Sbjct: 1010 ACATGAACGACGACGACAAC 991  
>novel\_mir\_122 Score: 2.2 R03G\_02192  
Query: 1 TGCATCTGCTGCTGCTGTTG 20  
|||\*\*|||||||||||||:|

Sbjct: 391 ACGATGACGACGACGACGAC 372  
>novel\_mir\_122 Score: 2.2 R03G\_17350  
Query: 1 TGCATCTGCTGCTGCTGTTG 20  
|||\*\*|||||||||||||:|

Sbjct: 362 ACGACGACGACGACGACGAC 343

>novel\_mir\_122 Score: 2.5 R03G\_17108  
Query: 1 TGCATCTGCTGCTGCTGTTG 20  
\*||\*\*|||||||  
Sbjct: 404 TCGACGACGACGACGACAAC 385  
>novel\_mir\_104 Score: 2.0 R03G\_12131  
Query: 1 CAGGGGGGGAAAGGGGGGAA 20  
|||:|:|||||||:|||\*||  
Sbjct: 509 GTCTCTCCCTTTCTCCCAT 490  
>novel\_mir\_104 Score: 2.5 R03G\_01691  
Query: 1 CAGGGGGGGAAAGGGGGGAA 20  
\*||:|||||||:|:|||\*  
Sbjct: 490 CTCTCCCCCTTTCTCTCCTC 471  
>novel\_mir\_85 Score: 0.0 R03G\_10719  
Query: 1 TGGATCCGATGTGGTTTGAGGC 22  
|||||||  
Sbjct: 45 ACCTAGGCTACACAAACTCCG 24  
>novel\_mir\_85 Score: 2.5 R03G\_02909  
Query: 1 TGGATCCGATGTGGTTTGAGGC 22  
||\*|||||||:|:|||||\*  
Sbjct: 375 ACATAGGCTACATCGAACTCCT 354  
>novel\_mir\_40 Score: 0.5 R03G\_14353  
Query: 1 TCATTTGTCTGGGTATCGCTGAT 22  
|||||||:|||||||  
Sbjct: 650 AGTAAACAGCCTATAGCGACTA 629  
>novel\_mir\_40 Score: 2.0 R03G\_12657  
Query: 1 TCATTTGTCTGGGTATCGCTGAT 22  
|||||||\*|||||||  
Sbjct: 650 AGTAAACTACCCATAGCGACTA 629  
>novel\_mir\_40 Score: 0.0 R03G\_10868  
Query: 1 TCATTTGTCTGGGTATCGCTGAT 22  
|||||||  
Sbjct: 386 AGTAAACAGCCCATAGCGACTA 365  
>novel\_mir\_40 Score: 0.0 R03G\_06437  
Query: 1 TCATTTGTCTGGGTATCGCTGAT 22  
|||||||  
Sbjct: 650 AGTAAACAGCCCATAGCGACTA 629  
>novel\_mir\_40 Score: 0.0 R03G\_05341  
Query: 1 TCATTTGTCTGGGTATCGCTGAT 22  
|||||||  
Sbjct: 650 AGTAAACAGCCCATAGCGACTA 629  
>novel\_mir\_40 Score: 0.0 R03G\_03100  
Query: 1 TCATTTGTCTGGGTATCGCTGAT 22  
|||||||  
Sbjct: 650 AGTAAACAGCCCATAGCGACTA 629  
>novel\_mir\_40 Score: 0.0 R03G\_17415

Query: 1 TCATTTGTCGGGTATCGCTGAT 22  
|||||||  
Sbjct: 650 AGTAAACAGCCCATAGCGACTA 629  
>novel\_mir\_40 Score: 0.0 R03G\_17332  
Query: 1 TCATTTGTCGGGTATCGCTGAT 22  
|||||||  
Sbjct: 650 AGTAAACAGCCCATAGCGACTA 629  
>novel\_mir\_107 Score: 2.5 R03G\_17266  
Query: 1 TGGACCTGAGTATGCTTGTGGA 23  
\*||||\*||:||||||:||:|  
Sbjct: 133 TCCTGGTCTTATACGAACGACTT 111  
>novel\_mir\_107 Score: 2.5 R03G\_17349  
Query: 1 TGGACCTGAGTATGCTTGTGGA 23  
\*||||\*||:||||||:||:|  
Sbjct: 130 TCCTGGTCTTATACGAACGACTT 108  
>novel\_mir\_62 Score: 0.0 R03G\_14870  
Query: 1 TGATGTAGCCTAATGATTGA 20  
|||||||  
Sbjct: 1747 ACTACATCGGATTACTAACT 1728  
>novel\_mir\_62 Score: 0.0 R03G\_14186  
Query: 1 TGATGTAGCCTAATGATTGA 20  
|||||||  
Sbjct: 1747 ACTACATCGGATTACTAACT 1728  
>novel\_mir\_62 Score: 0.0 R03G\_14190  
Query: 1 TGATGTAGCCTAATGATTGA 20  
|||||||  
Sbjct: 1747 ACTACATCGGATTACTAACT 1728  
>novel\_mir\_62 Score: 2.5 R03G\_12512  
Query: 1 TGATGTAGCCTAATGATTGA 20  
|:||||||:||:|:\*||  
Sbjct: 876 ATTACATCGGGTTATTG-CT 858  
>novel\_mir\_62 Score: 2.5 R03G\_08432  
Query: 1 TGATGTAGCCTAATGATTGA 20  
||||\*||||\*||||:|  
Sbjct: 2129 ACTACAACGGATAACTAGTT 2110  
>novel\_mir\_62 Score: 0.0 R03G\_08806  
Query: 1 TGATGTAGCCTAATGATTGA 20  
|||||||  
Sbjct: 1747 ACTACATCGGATTACTAACT 1728  
>novel\_mir\_62 Score: 0.0 R03G\_07552  
Query: 1 TGATGTAGCCTAATGATTGA 20  
|||||||  
Sbjct: 706 ACTACATCGGATTACTAACT 687  
>novel\_mir\_62 Score: 0.0 R03G\_01029  
Query: 1 TGATGTAGCCTAATGATTGA 20

|||||  
Sbjct: 706 ACTACATCGGACTACTAACT 687  
>novel\_mir\_68 Score: 1.0 R03G\_05190  
Query: 1 TAGAAGGAGCTGACCATGTGGA 22  
|||||\*|||||  
Sbjct: 210 ATCTTCCTCGACCGGTACACCT 189  
>novel\_mir\_68 Score: 2.2 R03G\_17104  
Query: 1 TAGAAGGAGCTGACCATGTGGA 22  
:|\*|||||\*\*  
Sbjct: 97 GTCGTCCTCGACTGGTACACGG 76  
>novel\_mir\_47 Score: 2.0 R03G\_16896  
Query: 1 TCAAGGGCCAGACATCTATCGA 22  
|||||\*|\*|\*|  
Sbjct: 1290 AGTTCCCGGTCTGTAAA-ATCT 1270  
>novel\_mir\_47 Score: 2.0 R03G\_12002  
Query: 1 TCAAGGGCCAGACATCTATCGA 22  
|||||\*|\*|\*|  
Sbjct: 1290 AGTTCCCGGTCTGTAAA-ATCT 1270  
>novel\_mir\_47 Score: 2.0 R03G\_00645  
Query: 1 TCAAGGGCCAGACATCTATCGA 22  
|||||\*|\*|\*|  
Sbjct: 1116 AGTTCCCGGTCTGTAAA-ATCT 1096  
>novel\_mir\_110 Score: 1.8 R03G\_11980  
Query: 1 TGATAGGGTACTTGGATGATGT 22  
\*||:|||||\*|||  
Sbjct: 63 TCTGTCCCATGAACCTATCACA 42  
>novel\_mir\_110 Score: 2.5 R03G\_11188  
Query: 1 TGATAGGGTACTTGGATGATGT 22  
|||||\*||\*\*||  
Sbjct: 1187 ACTATCCCATGAACGTAGGTCA 1166  
>novel\_mir\_110 Score: 2.2 R03G\_08078  
Query: 1 TGATAGGGTACTTGGATGATGT 22  
|||||\*|||||:|::|  
Sbjct: 1939 ACTATCCTTTGAACCTATTGTA 1918  
>novel\_mir\_110 Score: 2.5 R03G\_04547  
Query: 1 TGATAGGGTACTTGGATGATGT 22  
|||||:||||\*|:|||||:  
Sbjct: 569 ACTATCTCATGTATCTACTATG 548  
>novel\_mir\_46 Score: 1.0 R03G\_16914  
Query: 1 TTGTGCTGAGTGCTGATTGGAG 22  
|||||:|||||\*|  
Sbjct: 2643 AACACGACTCGCGACTAACCCC 2622  
>novel\_mir\_46 Score: 1.0 R03G\_14713  
Query: 1 TTGTGCTGAGTGCTGATTGGAG 22  
|||||:|||||\*|



>novel\_mir\_54 Score: 0.0 R03G\_13228  
Query: 1 TGTGAATGAATGTTAACCGA 20  
|||||  
Sbjct: 1436 ACACTTACTTACAATTGGCT 1417

>novel\_mir\_54 Score: 2.5 R03G\_08212  
Query: 1 TGTGAATGAATGTTAACCGA 20  
|||||\*|||||\*\*||  
Sbjct: 331 ACACTTAGTTACAATT-CCT 313

>novel\_mir\_54 Score: 0.0 R03G\_08806  
Query: 1 TGTGAATGAATGTTAACCGA 20  
|||||  
Sbjct: 1847 ACACTTACTTACAATTGGCT 1828

>novel\_mir\_54 Score: 2.5 R03G\_09036  
Query: 1 TGTGAATGAATGTTAACCGA 20  
:\*|:|||||:||||:|  
Sbjct: 611 GAATTTACTTACAGTTGGTT 592

>novel\_mir\_54 Score: 1.5 R03G\_03477  
Query: 1 TGTGAATGAATGTTAACCGA 20  
\*|||||:||||\*||  
Sbjct: 1586 CCACTTACTTACGATTG-CT 1568

>novel\_mir\_54 Score: 1.0 R03G\_01029  
Query: 1 TGTGAATGAATGTTAACCGA 20  
||\*|||||  
Sbjct: 806 ACCCTTACTTACAATTGGCT 787

>novel\_mir\_38 Score: 2.0 R03G\_16776  
Query: 1 TGTTATTGATGTCCAGTCTACG 22  
|:|||||:||||:\*|||  
Sbjct: 397 ATAATAACTATAGGTTAAATGC 376

>novel\_mir\_38 Score: 2.0 R03G\_16779  
Query: 1 TGTTATTGATGTCCAGTCTACG 22  
|:|||||:||||:\*|||  
Sbjct: 775 ATAATAACTATAGGTTAAATGC 754

>novel\_mir\_38 Score: 2.0 R03G\_16085  
Query: 1 TGTTATTGATGTCCAGTCTACG 22  
|:|||||:||||:\*|||  
Sbjct: 775 ATAATAACTATAGGTTAAATGC 754

>novel\_mir\_38 Score: 2.0 R03G\_15802  
Query: 1 TGTTATTGATGTCCAGTCTACG 22  
|:|||||:||||:\*|||  
Sbjct: 775 ATAATAACTATAGGTTAAATGC 754

>novel\_mir\_38 Score: 2.0 R03G\_14949  
Query: 1 TGTTATTGATGTCCAGTCTACG 22  
|:|||||:||||:\*|||  
Sbjct: 397 ATAATAACTATAGGTTAAATGC 376

>novel\_mir\_38 Score: 2.0 R03G\_14215

Query: 1 TGTTATTGATGTCCAGTCTACG 22  
|:|||||||:||||:|\*|||  
Sbjct: 775 ATAATAACTATAGGTTAAATGC 754  
>novel\_mir\_38 Score: 2.0 R03G\_12567  
Query: 1 TGTTATTGATGTCCAGTCTACG 22  
|:|||||||:||||:|\*|||  
Sbjct: 775 ATAATAACTATAGGTTAAATGC 754  
>novel\_mir\_38 Score: 0.2 R03G\_11834  
Query: 1 TGTTATTGATGTCCAGTCTACG 22  
|||||||:|||||||:|||||||:|||||||:|||||||:  
Sbjct: 538 ACAATAACTACAGGTCAGATGT 517  
>novel\_mir\_38 Score: 0.0 R03G\_08300  
Query: 1 TGTTATTGATGTCCAGTCTACG 22  
|||||||:|||||||:|||||||:|||||||:|||||||:  
Sbjct: 757 ACAATAACTACAGGTCAGATGC 736  
>novel\_mir\_38 Score: 2.0 R03G\_08634  
Query: 1 TGTTATTGATGTCCAGTCTACG 22  
|:|||||||:||||:|\*|||  
Sbjct: 397 ATAATAACTATAGGTTAAATGC 376  
>novel\_mir\_38 Score: 0.0 R03G\_08905  
Query: 1 TGTTATTGATGTCCAGTCTACG 22  
|||||||:|||||||:|||||||:|||||||:|||||||:  
Sbjct: 757 ACAATAACTACAGGTCAGATGC 736  
>novel\_mir\_38 Score: 2.0 R03G\_06775  
Query: 1 TGTTATTGATGTCCAGTCTACG 22  
|:|||||||:||||:|\*|||  
Sbjct: 775 ATAATAACTATAGGTTAAATGC 754  
>novel\_mir\_38 Score: 2.0 R03G\_07854  
Query: 1 TGTTATTGATGTCCAGTCTACG 22  
|:|||||||:||||:|\*|||  
Sbjct: 775 ATAATAACTATAGGTTAAATGC 754  
>novel\_mir\_38 Score: 0.0 R03G\_05951  
Query: 1 TGTTATTGATGTCCAGTCTACG 22  
|||||||:|||||||:|||||||:|||||||:|||||||:  
Sbjct: 757 ACAATAACTACAGGTCAGATGC 736  
>novel\_mir\_38 Score: 2.0 R03G\_06350  
Query: 1 TGTTATTGATGTCCAGTCTACG 22  
|:|||||||:||||:|\*|||  
Sbjct: 397 ATAATAACTATAGGTTAAATGC 376  
>novel\_mir\_38 Score: 2.0 R03G\_04252  
Query: 1 TGTTATTGATGTCCAGTCTACG 22  
|:|||||||:||||:|\*|||  
Sbjct: 775 ATAATAACTATAGGTTAAATGC 754  
>novel\_mir\_38 Score: 2.0 R03G\_04496  
Query: 1 TGTTATTGATGTCCAGTCTACG 22



|:|||||||:||||:|\*||||  
Sbjct: 397 ATAATAACTATAGGTTAAATGC 376  
>novel\_mir\_38 Score: 2.5 R03G\_04993  
Query: 1 TGTTATTGATGTCCAGTCTACG 22  
|:|||||||\*||\*||  
Sbjct: 397 ATAATAACTACAGTTCAAAAGC 376  
>novel\_mir\_38 Score: 2.0 R03G\_02364  
Query: 1 TGTTATTGATGTCCAGTCTACG 22  
|:|||||||:||||:|\*||||  
Sbjct: 775 ATAATAACTATAGGTTAAATGC 754  
>novel\_mir\_38 Score: 2.5 R03G\_02365  
Query: 1 TGTTATTGATGTCCAGTCTACG 22  
||||||:|:||||:|\*||  
Sbjct: 547 ACAATAATTATAGGTTAAACGC 526  
>novel\_mir\_38 Score: 0.0 R03G\_03720  
Query: 1 TGTTATTGATGTCCAGTCTACG 22  
|||||||  
Sbjct: 757 ACAATAACTACAGGTCAGATGC 736  
>novel\_mir\_38 Score: 2.2 R03G\_00572  
Query: 1 TGTTATTGATGTCCAGTCTACG 22  
|:||||:|:||||\*|||:  
Sbjct: 748 ATAATAATTATAGGTCAAATGT 727  
>novel\_mir\_38 Score: 0.0 R03G\_00795  
Query: 1 TGTTATTGATGTCCAGTCTACG 22  
|||||||  
Sbjct: 757 ACAATAACTACAGGTCAGATGC 736  
>novel\_mir\_38 Score: 0.0 R03G\_01150  
Query: 1 TGTTATTGATGTCCAGTCTACG 22  
|||||||  
Sbjct: 757 ACAATAACTACAGGTCAGATGC 736  
>novel\_mir\_38 Score: 2.0 R03G\_01157  
Query: 1 TGTTATTGATGTCCAGTCTACG 22  
|:|||||||:||||:|\*||||  
Sbjct: 397 ATAATAACTATAGGTTAAATGC 376  
>novel\_mir\_38 Score: 0.0 R03G\_01159  
Query: 1 TGTTATTGATGTCCAGTCTACG 22  
|||||||  
Sbjct: 757 ACAATAACTACAGGTCAGATGC 736  
>novel\_mir\_38 Score: 2.0 R03G\_17397  
Query: 1 TGTTATTGATGTCCAGTCTACG 22  
|:|||||||:||||:|\*||||  
Sbjct: 397 ATAATAACTATAGGTTAAATGC 376  
>novel\_mir\_51 Score: 2.5 R03G\_16919  
Query: 1 TAAACGGTTTGTGGCAGAGACA 22  
||\*||\*|:|||||||

Sbjct: 39 ATGTTCTAAACACCGTCTCTGT 18  
>novel\_mir\_51 Score: 2.0 R03G\_12000  
Query: 1 TAAACGGTTTGTGGCAGAGACA 22  
|||||||\*||:||||\*|||  
Sbjct: 69 ATTTGCCAATCATCGTCT-TGT 49  
>novel\_mir\_51 Score: 2.5 R03G\_12546  
Query: 1 TAAACGGTTTGTGGCAGAGACA 22  
||\*||\*||:|||||||  
Sbjct: 39 ATGTTCTAAACACCGTCTCTGT 18  
>novel\_mir\_51 Score: 2.5 R03G\_10530  
Query: 1 TAAACGGTTTGTGGCAGAGACA 22  
||\*||\*||:|||||||  
Sbjct: 39 ATGTTCTAAACACCGTCTCTGT 18  
>novel\_mir\_51 Score: 2.5 R03G\_06436  
Query: 1 TAAACGGTTTGTGGCAGAGACA 22  
||\*||\*||:|||||||  
Sbjct: 39 ATGTTCTAAACACCGTCTCTGT 18  
>novel\_mir\_51 Score: 2.5 R03G\_03577  
Query: 1 TAAACGGTTTGTGGCAGAGACA 22  
||\*||\*||:|||||||  
Sbjct: 39 ATGTTCTAAACACCGTCTCTGT 18  
>novel\_mir\_51 Score: 2.5 R03G\_17432  
Query: 1 TAAACGGTTTGTGGCAGAGACA 22  
||\*||\*||:|||||||  
Sbjct: 39 ATGTTCTAAACACCGTCTCTGT 18  
>novel\_mir\_73 Score: 1.0 R03G\_17048  
Query: 1 TAGTGACCTTTCATGTGCGGAT 22  
|||:|||||||:|||||||  
Sbjct: 47 ATCATTGGAAAGTATACGCCTA 26  
>novel\_mir\_73 Score: 1.5 R03G\_16382  
Query: 1 TAGTGACCTTTCATGTGCGGAT 22  
||:|||||||\*|||||  
Sbjct: 1073 ATTACTGGAAAGTACAAGCCTA 1052  
>novel\_mir\_73 Score: 0.5 R03G\_16443  
Query: 1 TAGTGACCTTTCATGTGCGGAT 22  
||:|||||||\*|||||  
Sbjct: 41 ATTACTGGAAAGTACACGCCTA 20  
>novel\_mir\_73 Score: 1.0 R03G\_15794  
Query: 1 TAGTGACCTTTCATGTGCGGAT 22  
|||||||\*|||||  
Sbjct: 260 ATCACTGGAAAGTATACACCTA 239  
>novel\_mir\_73 Score: 1.8 R03G\_15207  
Query: 1 TAGTGACCTTTCATGTGCGGAT 22  
|||||||\*||\*||  
Sbjct: 260 ATCACTGGAAAGTATACATCCA 239

>novel\_mir\_73 Score: 0.0 R03G\_12457  
Query: 1 TAGTGACCTTTCATGTGCGGAT 22  
|||||  
Sbjct: 941 ATCACTGGAAAGTACACGCCTA 920

>novel\_mir\_73 Score: 2.5 R03G\_11364  
Query: 1 TAGTGACCTTTCATGTGCGGAT 22  
||||\*|||||:|\*||\*|  
Sbjct: 917 ATCACCGGAAAGTATACACCCA 896

>novel\_mir\_73 Score: 1.8 R03G\_09250  
Query: 1 TAGTGACCTTTCATGTGCGGAT 22  
||:|\*|||||:|  
Sbjct: 1004 ATTACCGGAAAGTACACGTCTA 983

>novel\_mir\_73 Score: 0.0 R03G\_08570  
Query: 1 TAGTGACCTTTCATGTGCGGAT 22  
|||||  
Sbjct: 32 ATCACTGGAAAGTACACGCCTA 11

>novel\_mir\_73 Score: 1.8 R03G\_08647  
Query: 1 TAGTGACCTTTCATGTGCGGAT 22  
||:|||||:|\*|:|  
Sbjct: 482 ATTACTGGAAAGTATACTCTTA 461

>novel\_mir\_73 Score: 2.0 R03G\_02484  
Query: 1 TAGTGACCTTTCATGTGCGGAT 22  
||:||\*|||||\*|||  
Sbjct: 689 ATTACTAGAAAGTACACACCTA 668

>novel\_mir\_73 Score: 1.8 R03G\_03146  
Query: 1 TAGTGACCTTTCATGTGCGGAT 22  
||:|\*|||||:|  
Sbjct: 620 ATTACAGGAAAGTACACGTCTA 599

>novel\_mir\_73 Score: 0.5 R03G\_03724  
Query: 1 TAGTGACCTTTCATGTGCGGAT 22  
|||||\*|||  
Sbjct: 722 ATCACTGGAAAGTACACACCTA 701

>novel\_mir\_73 Score: 1.0 R03G\_01430  
Query: 1 TAGTGACCTTTCATGTGCGGAT 22  
\*|||||\*  
Sbjct: 839 TTCACTGGAAAGTACACGCCTT 818

>novel\_mir\_73 Score: 2.0 R03G\_01465  
Query: 1 TAGTGACCTTTCATGTGCGGAT 22  
||||\*|||||:|\*|||  
Sbjct: 260 ATCACCGGAAAGTATACACCTA 239

>novel\_mir\_73 Score: 2.0 R03G\_01842  
Query: 1 TAGTGACCTTTCATGTGCGGAT 22  
||||\*|||||:|\*|||  
Sbjct: 695 ATCACCGGAAAGTATACACCTA 674

>novel\_mir\_105 Score: 1.2 R03G\_15523

Query: 1 TGGGCAAGACTGGATGATGAGT 22  
|||||||\*|||||||:|  
Sbjct: 146 ACCCGTTCCGACCTACTACTCG 125  
>novel\_mir\_17 Score: 2.5 R03G\_17033  
Query: 1 TACGGTCAACAGTGTGCATAAGC 22  
\*|||:||||\*||:|||||||  
Sbjct: 388 TTGCTAGTTGGCATAGTATTCG 367  
>novel\_mir\_17 Score: 1.8 R03G\_13221  
Query: 1 TACGGTCAACAGTGTGCATAAGC 22  
:\*||:|||||||:|||||||  
Sbjct: 1447 GAGCTAGTTGTCACAGTATTCG 1426  
>novel\_mir\_17 Score: 1.8 R03G\_13224  
Query: 1 TACGGTCAACAGTGTGCATAAGC 22  
:\*||:|||||||:|||||||  
Sbjct: 1447 GAGCTAGTTGTCACAGTATTCG 1426  
>novel\_mir\_17 Score: 2.5 R03G\_12456  
Query: 1 TACGGTCAACAGTGTGCATAAGC 22  
\*|||:||||\*||:|||||||  
Sbjct: 370 TTGCTAGTTGGCATAGTATTCG 349  
>novel\_mir\_17 Score: 0.0 R03G\_12520  
Query: 1 TACGGTCAACAGTGTGCATAAGC 22  
|||||||:|||||||:|||||||  
Sbjct: 1165 ATGCCAGTTGTCACAGTATTCG 1144  
>novel\_mir\_17 Score: 2.5 R03G\_09507  
Query: 1 TACGGTCAACAGTGTGCATAAGC 22  
\*|||:||||\*||:|||||||  
Sbjct: 442 TTGCTAGTTGGCATAGTATTCG 421  
>novel\_mir\_17 Score: 2.5 R03G\_08181  
Query: 1 TACGGTCAACAGTGTGCATAAGC 22  
\*|||:||||\*||:|||||||  
Sbjct: 145 TTGCTAGTTGGCATAGTATTCG 124  
>novel\_mir\_17 Score: 2.2 R03G\_04583  
Query: 1 TACGGTCAACAGTGTGCATAAGC 22  
:||:||||\*||||\*||  
Sbjct: 538 GTGTCAGTTGACACAGTATACG 517  
>novel\_mir\_17 Score: 2.2 R03G\_05216  
Query: 1 TACGGTCAACAGTGTGCATAAGC 22  
:|||||||\*||:||||\*||  
Sbjct: 727 GTGCCAGTTGCCATAGTATACG 706  
>novel\_mir\_17 Score: 2.5 R03G\_03515  
Query: 1 TACGGTCAACAGTGTGCATAAGC 22  
\*|||:||||\*||:|||||||  
Sbjct: 85 TTGCTAGTTGGCATAGTATTCG 64  
>novel\_mir\_17 Score: 1.8 R03G\_04120  
Query: 1 TACGGTCAACAGTGTGCATAAGC 22

:\*||:|||||||  
Sbjct: 1447 GAGCTAGTTGTCACAGTATTCG 1426  
>novel\_mir\_17 Score: 1.8 R03G\_04123  
Query: 1 TACGGTCAACAGTGTGTCATAAGC 22  
:\*||:|||||||  
Sbjct: 1447 GAGCTAGTTGTCACAGTATTCG 1426  
>novel\_mir\_17 Score: 1.8 R03G\_04203  
Query: 1 TACGGTCAACAGTGTGTCATAAGC 22  
:\*||:|||||||  
Sbjct: 391 GAGCTAGTTGTCACAGTATTCG 370  
>novel\_mir\_17 Score: 2.5 R03G\_00134  
Query: 1 TACGGTCAACAGTGTGTCATAAGC 22  
\*|||:||||\*||:|||||||  
Sbjct: 388 TTGCTAGTTGGCATAGTATTCG 367  
>novel\_mir\_17 Score: 2.5 R03G\_00149  
Query: 1 TACGGTCAACAGTGTGTCATAAGC 22  
\*|||:||||\*||:|||||||  
Sbjct: 388 TTGCTAGTTGGCATAGTATTCG 367  
>novel\_mir\_17 Score: 0.0 R03G\_00797  
Query: 1 TACGGTCAACAGTGTGTCATAAGC 22  
|||||||  
Sbjct: 1165 ATGCCAGTTGTCACAGTATTCG 1144  
>novel\_mir\_17 Score: 2.5 R03G\_01653  
Query: 1 TACGGTCAACAGTGTGTCATAAGC 22  
\*|||:||||\*||:|||||||  
Sbjct: 424 TTGCTAGTTGGCATAGTATTCG 403  
>novel\_mir\_17 Score: 1.8 R03G\_17094  
Query: 1 TACGGTCAACAGTGTGTCATAAGC 22  
:\*||:|||||||  
Sbjct: 106 GAGCTAGTTGTCACAGTATTCG 85  
>novel\_mir\_2 Score: 2.5 R03G\_05759  
Query: 1 TTTCAGACTCTTCTTCGCCAAC 22  
||||\*|||||||:\*|||\*  
Sbjct: 1534 AAAGTATGAGAAGAAGTCGTTA 1513  
>novel\_mir\_2 Score: 2.5 R03G\_04185  
Query: 1 TTTCAGACTCTTCTTCGCCAAC 22  
||||:||||||\*||:||\*||  
Sbjct: 1837 AAAGTTTGAGAAGTAGTGGCTG 1816  
>novel\_mir\_2 Score: 2.5 R03G\_00477  
Query: 1 TTTCAGACTCTTCTTCGCCAAC 22  
\*|||||||\*||\*|||  
Sbjct: 1584 TAAGTCTGAGAAGAACTATTG 1563  
>novel\_mir\_2 Score: 0.0 R03G\_00816  
Query: 1 TTTCAGACTCTTCTTCGCCAAC 22  
|||||||

Sbjct: 625 AAAGTCTGAGAAGAAGCGGTTG 604  
>novel\_mir\_118 Score: 2.0 R03G\_06035  
Query: 1 TAGAAATGAGTTGAGGCCGTGA 22  
:|||||||:\*|||||||:|||

Sbjct: 1197 GTCTTTACTTTACTCCGGTACT 1176  
>novel\_mir\_9 Score: 0.5 R03G\_13030  
Query: 1 TATAGGGTCAGCTATTGCTTCA 22  
||||:|||||||

Sbjct: 282 ATATTCCAGTCGATAACGAAGT 261  
>novel\_mir\_9 Score: 0.5 R03G\_11694  
Query: 1 TATAGGGTCAGCTATTGCTTCA 22  
|||||||

Sbjct: 732 ATATCCCAGTCGATAACAAAGT 711  
>novel\_mir\_9 Score: 0.5 R03G\_10820  
Query: 1 TATAGGGTCAGCTATTGCTTCA 22  
|||||||\*|||

Sbjct: 957 ATATCCCAGTCGATAACAAAGT 936  
>novel\_mir\_9 Score: 0.5 R03G\_09771  
Query: 1 TATAGGGTCAGCTATTGCTTCA 22  
|||||||\*|||

Sbjct: 255 ATATCCCAGTCGATAACAAAGT 234  
>novel\_mir\_9 Score: 1.0 R03G\_10175  
Query: 1 TATAGGGTCAGCTATTGCTTCA 22  
|||||||\*|||

Sbjct: 633 ATATCCTAGTCGATAACGAAAT 612  
>novel\_mir\_9 Score: 1.0 R03G\_10178  
Query: 1 TATAGGGTCAGCTATTGCTTCA 22  
|||||||\*|||

Sbjct: 633 ATATCCTAGTCGATAACGAAAT 612  
>novel\_mir\_9 Score: 2.5 R03G\_09075  
Query: 1 TATAGGGTCAGCTATTGCTTCA 22  
||:|:::|||||||:|||||||

Sbjct: 303 ATGTTTTAGTCGATGACGAAGT 282  
>novel\_mir\_9 Score: 1.0 R03G\_06306  
Query: 1 TATAGGGTCAGCTATTGCTTCA 22  
|||||||\*|||

Sbjct: 633 ATATCCTAGTCGATAACAAAGT 612  
>novel\_mir\_9 Score: 0.5 R03G\_06354  
Query: 1 TATAGGGTCAGCTATTGCTTCA 22  
|||||||\*|||

Sbjct: 510 ATATCCCAGTCGATAACAAAGT 489  
>novel\_mir\_9 Score: 0.5 R03G\_02367  
Query: 1 TATAGGGTCAGCTATTGCTTCA 22  
|||||||\*|||

Sbjct: 633 ATATCCCAGTCGATAACAAAGT 612

>novel\_mir\_9 Score: 0.0 R03G\_02455  
Query: 1 TATAGGGTCAGCTATTGCTTCA 22  
|||||  
Sbjct: 201 ATATCCCAGTCGATAACGAAGT 180

>novel\_mir\_9 Score: 0.5 R03G\_03269  
Query: 1 TATAGGGTCAGCTATTGCTTCA 22  
|||||\*|||  
Sbjct: 801 ATATCCCAGTCGATAACAAAGT 780

>novel\_mir\_9 Score: 0.5 R03G\_04131  
Query: 1 TATAGGGTCAGCTATTGCTTCA 22  
|||||\*|||  
Sbjct: 957 ATATCCCAGTCGATAACAAAGT 936

>novel\_mir\_9 Score: 1.0 R03G\_00521  
Query: 1 TATAGGGTCAGCTATTGCTTCA 22  
|||||:|||||\*|||  
Sbjct: 651 ATATCCCGGTCGATAACAAAGT 630

>novel\_mir\_96 Score: 2.5 R03G\_08704  
Query: 1 TGGTTGTTCTATATTCTTGAAG 22  
\*|:\*|\*|||||\*  
Sbjct: 898 CCTATCAAGATATAAGAACTTA 877

>novel\_mir\_123 Score: 1.5 R03G\_16737  
Query: 1 TGAGCTGCAACTTCAATGGAT 21  
|||||\*|||||\*|||  
Sbjct: 496 ACTCGAAGTTGAAGTTAACTA 476

>novel\_mir\_123 Score: 1.5 R03G\_16541  
Query: 1 TGAGCTGCAACTTCAATGGAT 21  
|||||\*|||||\*|||  
Sbjct: 496 ACTCGAAGTTGAAGTTAACTA 476

>novel\_mir\_123 Score: 1.5 R03G\_16141  
Query: 1 TGAGCTGCAACTTCAATGGAT 21  
|||||\*|||||\*|||  
Sbjct: 496 ACTCGAAGTTGAAGTTAACTA 476

>novel\_mir\_123 Score: 2.5 R03G\_16124  
Query: 1 TGAGCTGCAACTTCAATGGAT 21  
|||||\*|||||\*|||  
Sbjct: 496 ACTCGAAGTTGAAGTTAACTA 476

>novel\_mir\_123 Score: 1.5 R03G\_15286  
Query: 1 TGAGCTGCAACTTCAATGGAT 21  
|||||\*|||||\*|||  
Sbjct: 496 ACTCGAAGTTGAAGTTAACTA 476

>novel\_mir\_123 Score: 1.5 R03G\_14981  
Query: 1 TGAGCTGCAACTTCAATGGAT 21  
|||||\*|||||\*|||  
Sbjct: 496 ACTCGAAGTTGAAGTTAACTA 476

>novel\_mir\_123 Score: 2.0 R03G\_15145

Query: 1 TGAGCTGCAACTTCAATGGAT 21  
|:||||\*|||||||\*|||  
Sbjct: 496 ATTCGAAGTTGAAGTTAACTA 476  
>novel\_mir\_123 Score: 1.5 R03G\_15170  
Query: 1 TGAGCTGCAACTTCAATGGAT 21  
|||||\*|||||||\*|||  
Sbjct: 496 ACTCGAAGTTGAAGTTAACTA 476  
>novel\_mir\_123 Score: 1.5 R03G\_14784  
Query: 1 TGAGCTGCAACTTCAATGGAT 21  
|||||\*|||||||\*|||  
Sbjct: 496 ACTCGAAGTTGAAGTTAACTA 476  
>novel\_mir\_123 Score: 1.5 R03G\_13752  
Query: 1 TGAGCTGCAACTTCAATGGAT 21  
|||||\*|||||||\*|||  
Sbjct: 496 ACTCGAAGTTGAAGTTAACTA 476  
>novel\_mir\_123 Score: 1.5 R03G\_12950  
Query: 1 TGAGCTGCAACTTCAATGGAT 21  
|||||\*|||||||\*|||  
Sbjct: 496 ACTCGAAGTTGAAGTTAACTA 476  
>novel\_mir\_123 Score: 2.5 R03G\_13267  
Query: 1 TGAGCTGCAACTTCAATGGAT 21  
|||||\*|||||||\*|||  
Sbjct: 449 ACTCGAAGTTGAAGTCAACTA 429  
>novel\_mir\_123 Score: 1.5 R03G\_12084  
Query: 1 TGAGCTGCAACTTCAATGGAT 21  
|||||\*|||||||\*|||  
Sbjct: 449 ACTCGAAGTTGAAGTTAACTA 429  
>novel\_mir\_123 Score: 1.5 R03G\_11536  
Query: 1 TGAGCTGCAACTTCAATGGAT 21  
|||||\*|||||||\*|||  
Sbjct: 496 ACTCGAAGTTGAAGTTAACTA 476  
>novel\_mir\_123 Score: 1.5 R03G\_10785  
Query: 1 TGAGCTGCAACTTCAATGGAT 21  
|||||\*|||||||\*|||  
Sbjct: 449 ACTCGAAGTTGAAGTTAACTA 429  
>novel\_mir\_123 Score: 2.5 R03G\_10797  
Query: 1 TGAGCTGCAACTTCAATGGAT 21  
|||||\*|||||||\*|||  
Sbjct: 496 ACTCGAAGTTGAAGTCAACTA 476  
>novel\_mir\_123 Score: 2.5 R03G\_09918  
Query: 1 TGAGCTGCAACTTCAATGGAT 21  
|||||||\*||\*||\*||\*||  
Sbjct: 92 ACTCGACGTTGAAATAACC-A 73  
>novel\_mir\_123 Score: 1.5 R03G\_09926  
Query: 1 TGAGCTGCAACTTCAATGGAT 21



|||||\*|||||\*|||  
Sbjct: 496 ACTCGAAGTTGAAGTTAACTA 476  
>novel\_mir\_123 Score: 1.5 R03G\_10050  
Query: 1 TGAGCTGCAACTTCAATGGAT 21  
|||||\*|||||\*|||  
Sbjct: 496 ACTCGAAGTTGAAGTTAACTA 476  
>novel\_mir\_123 Score: 2.2 R03G\_10087  
Query: 1 TGAGCTGCAACTTCAATGGAT 21  
|||||\*|||\*|||  
Sbjct: 203 ACTCGACGTTGGACTTAGTTA 183  
>novel\_mir\_123 Score: 2.0 R03G\_08462  
Query: 1 TGAGCTGCAACTTCAATG-GAT 21  
|||||\*|||||\*|||  
Sbjct: 905 ACTCGACGTTGTAGTTACAATA 884  
>novel\_mir\_123 Score: 2.5 R03G\_07136  
Query: 1 TGAGCTGCAACTTCAATGGAT 21  
|||||\*|||||\*|||  
Sbjct: 187 ACTCGAAGTTGAAGTCAACTA 167  
>novel\_mir\_123 Score: 1.5 R03G\_07723  
Query: 1 TGAGCTGCAACTTCAATGGAT 21  
|||||\*|||||\*|||  
Sbjct: 496 ACTCGAAGTTGAAGTTAACTA 476  
>novel\_mir\_123 Score: 1.5 R03G\_05522  
Query: 1 TGAGCTGCAACTTCAATGGAT 21  
|||||\*|||||\*|||  
Sbjct: 862 ACTCGAAGTTGAAGTTAACTA 842  
>novel\_mir\_123 Score: 1.5 R03G\_05516  
Query: 1 TGAGCTGCAACTTCAATGGAT 21  
|||||\*|||||\*|||  
Sbjct: 496 ACTCGAAGTTGAAGTTAACTA 476  
>novel\_mir\_123 Score: 1.5 R03G\_03112  
Query: 1 TGAGCTGCAACTTCAATGGAT 21  
|||||\*|||||\*|||  
Sbjct: 862 ACTCGAAGTTGAAGTTAACTA 842  
>novel\_mir\_123 Score: 1.5 R03G\_03560  
Query: 1 TGAGCTGCAACTTCAATGGAT 21  
|||||\*|||||\*|||  
Sbjct: 496 ACTCGAAGTTGAAGTTAACTA 476  
>novel\_mir\_123 Score: 1.5 R03G\_03791  
Query: 1 TGAGCTGCAACTTCAATGGAT 21  
|||||\*|||||\*|||  
Sbjct: 496 ACTCGAAGTTGAAGTTAACTA 476  
>novel\_mir\_123 Score: 1.5 R03G\_00240  
Query: 1 TGAGCTGCAACTTCAATGGAT 21  
|||||\*|||||\*|||

Sbjct: 805 ACTCGAAGTTGAAGTTAACTA 785  
>novel\_mir\_123 Score: 1.5 R03G\_00250  
Query: 1 TGAGCTGCAACTTCAATGGAT 21  
|||||\*|||||||\*|||  
Sbjct: 449 ACTCGAAGTTGAAGTTAACTA 429  
>novel\_mir\_123 Score: 1.5 R03G\_01725  
Query: 1 TGAGCTGCAACTTCAATGGAT 21  
|||||\*|||||||\*|||  
Sbjct: 496 ACTCGAAGTTGAAGTTAACTA 476  
>novel\_mir\_123 Score: 1.5 R03G\_02227  
Query: 1 TGAGCTGCAACTTCAATGGAT 21  
|||||\*|||||||\*|||  
Sbjct: 862 ACTCGAAGTTGAAGTTAACTA 842  
>novel\_mir\_123 Score: 1.5 R03G\_17423  
Query: 1 TGAGCTGCAACTTCAATGGAT 21  
|||||\*|||||||\*|||  
Sbjct: 496 ACTCGAAGTTGAAGTTAACTA 476  
>novel\_mir\_123 Score: 1.5 R03G\_17328  
Query: 1 TGAGCTGCAACTTCAATGGAT 21  
|||||\*|||||||\*|||  
Sbjct: 496 ACTCGAAGTTGAAGTTAACTA 476  
>novel\_mir\_123 Score: 1.5 R03G\_17092  
Query: 1 TGAGCTGCAACTTCAATGGAT 21  
|||||\*|||||||\*|||  
Sbjct: 496 ACTCGAAGTTGAAGTTAACTA 476  
>novel\_mir\_83 Score: 1.0 R03G\_15882  
Query: 1 TGAAGAAGAAGATAGCGCGTATA 23  
|||||||\*|||||||  
Sbjct: 866 ACTTCTTCTTCTATCACGCATAT 844  
>novel\_mir\_83 Score: 1.0 R03G\_03787  
Query: 1 TGAAGAAGAAGATAGCGCGTATA 23  
|||||||\*|||||||  
Sbjct: 470 ACTTCTTCTTCTATCACGCATAT 448  
>novel\_mir\_83 Score: 1.0 R03G\_00684  
Query: 1 TGAAGAAGAAGATAGCGCGTATA 23  
|||||||\*|||||||  
Sbjct: 1641 ACTTCTTCTTCTATCACGCATAT 1619  
>novel\_mir\_83 Score: 1.0 R03G\_01315  
Query: 1 TGAAGAAGAAGATAGCGCGTATA 23  
|||||||\*|||||||  
Sbjct: 861 ACTTCTTCTTCTATCACGCATAT 839  
>novel\_mir\_72 Score: 0.0 R03G\_08467  
Query: 1 TAGCTAGAAGATGATTGTGAAG 22  
|||||||\*|||||||  
Sbjct: 106 ATCGATCTTCTACTAACACTTC 85



Query: 1 TATCCCAGATCAGTTAAAG 19  
\*|||||\*|||  
Sbjct: 286 CTAGGGTCTAGTCACGTTC 268  
>novel\_mir\_7 Score: 2.5 R03G\_10922  
Query: 1 TGAGGATGTTTTGGGGAGGAG 22  
\*|||||\*|||  
Sbjct: 212 TCTCCTATAAAAACCCAACCTC 191  
>novel\_mir\_7 Score: 2.5 R03G\_08171  
Query: 1 TGAGGATGTTTTGGGGAGGAG 22  
|||||\*|||  
Sbjct: 758 ACTCCTGCATGAACTCCTCCTC 737  
>novel\_mir\_7 Score: 2.5 R03G\_05020  
Query: 1 TGAGGATGTTTTGGGGAGGAG 22  
|||\*|||  
Sbjct: 137 ACTTCTCCAAGAACTCCTCCTC 116  
>novel\_mir\_7 Score: 2.5 R03G\_02927  
Query: 1 TGAGGATGTTTTGGGGAGGAG 22  
\*|||||\*|||  
Sbjct: 482 TCTCCTATAAAAACCCAACCTC 461  
>novel\_mir\_86 Score: 0.5 R03G\_15153  
Query: 1 TTTATTGTGGCACAGACAGTCAA 23  
|:|||||  
Sbjct: 123 AGATAACACCGTGTCTGTCAGTT 101  
>novel\_mir\_86 Score: 0.5 R03G\_14776  
Query: 1 TTTATTGTGGCACAGACAGTCAA 23  
|:|||||  
Sbjct: 74 AGATAACACCGTGTCTGTCAGTT 52  
>novel\_mir\_36 Score: 2.5 R03G\_16255  
Query: 1 TGTTTAAAGTATGTTGGAAT 20  
|:||||\*||\*|||  
Sbjct: 2320 ATAAATTACATCCAACCTTA 2301  
>novel\_mir\_36 Score: 2.5 R03G\_16121  
Query: 1 TGTTTAAAGTATGTTGGAAT 20  
||||:|||:||||:|||\*|\*  
Sbjct: 247 ACAAGTTTTATACGACCATT 228  
>novel\_mir\_36 Score: 0.5 R03G\_15279  
Query: 1 TGTTTAAAGTATGTTGGAAT 20  
|||||\*|||  
Sbjct: 581 ACAAATTCATACAACCCTA 562  
>novel\_mir\_36 Score: 2.5 R03G\_13850  
Query: 1 TGTTTAAAGTATGTTGGAAT 20  
||||:|||:||||:|||\*|\*  
Sbjct: 100 ACAAGTTTTATACGACCATT 81  
>novel\_mir\_36 Score: 2.5 R03G\_10237  
Query: 1 TGTTTAAAGTATGTTGGAAT 20



Sbjct: 530 ACAAATTTTCATACAACCCTA 511  
>novel\_mir\_36 Score: 0.5 R03G\_01708  
Query: 1 TGTTTAAAGTATGTTGGAAT 20  
|||||\*||  
Sbjct: 593 ACAAATTTTCATACAACCCTA 574  
>novel\_mir\_36 Score: 2.5 R03G\_01709  
Query: 1 TGTTTAAAGTATGTTGGAAT 20  
||||:||||:||||:||||\*|\*  
Sbjct: 292 ACAAGTTTTATACGACCATT 273  
>novel\_mir\_36 Score: 0.5 R03G\_17369  
Query: 1 TGTTTAAAGTATGTTGGAAT 20  
|||||\*||  
Sbjct: 947 ACAAATTTTCATACAACCCTA 928  
>novel\_mir\_36 Score: 2.5 R03G\_17316  
Query: 1 TGTTTAAAGTATGTTGGAAT 20  
||||:||||:||||:||||\*|\*  
Sbjct: 292 ACAAGTTTTATACGACCATT 273  
>novel\_mir\_10 Score: 0.2 R03G\_09665  
Query: 1 TACCACATTTTCAGCCTTCG 20  
|||||\*||  
Sbjct: 315 ATGGTGTAAGTTCGGAAGT 296  
>novel\_mir\_10 Score: 1.0 R03G\_00131  
Query: 1 TACCACATTTTCAGCCTTCG 20  
||\*|||||\*||  
Sbjct: 498 ATCGTGTAAGTTCGGAAGC 479  
>novel\_mir\_10 Score: 2.0 R03G\_00816  
Query: 1 TACCACATTTTCAGCCTTCG 20  
|||||\*||\*|\*|\*  
Sbjct: 633 ATGGTGTAAGTCTGA-GA 615  
>novel\_mir\_10 Score: 2.5 R03G\_01524  
Query: 1 TACCACATTTTCAGCCTTCG 20  
||\*|||||:||||\*|||||  
Sbjct: 1026 ATAGTGTAAGTCAGAAGC 1007  
>novel\_mir\_100 Score: 2.5 R03G\_17226  
Query: 1 TTGAACGAGGAAGTTTTGTTG 21  
||||\*||\*|||||\*|||  
Sbjct: 1533 AACTAGCACCTTCAAAA-AAC 1514  
>novel\_mir\_100 Score: 2.5 R03G\_16815  
Query: 1 TTGAACGAGGAAGTTTTGTTG 21  
||||\*||\*|||||\*|||  
Sbjct: 1533 AACTAGCACCTTCAAAA-AAC 1514  
>novel\_mir\_100 Score: 2.5 R03G\_14795  
Query: 1 TTGAACGAGGAAGTTTTGTTG 21  
||||\*||\*|||||\*|||  
Sbjct: 1533 AACTAGCACCTTCAAAA-AAC 1514

>novel\_mir\_100 Score: 0.0 R03G\_13496  
Query: 1 TTGAACGAGGAAGTTTTGTTG 21  
|||||  
Sbjct: 376 AACTTGCTCCTTCAAAACAAC 356  
>novel\_mir\_100 Score: 0.0 R03G\_13497  
Query: 1 TTGAACGAGGAAGTTTTGTTG 21  
|||||  
Sbjct: 178 AACTTGCTCCTTCAAAACAAC 158  
>novel\_mir\_100 Score: 1.0 R03G\_05190  
Query: 1 TTGAACGAGGAAGTTTTGTTG 21  
|||||\*|||  
Sbjct: 88 AACTTGCTCCTTCTAAACAAC 68  
>novel\_mir\_126 Score: 2.0 R03G\_16387  
Query: 1 TTAGTGTGACGCAGTTGGTGTA 23  
||\*\*|||||  
Sbjct: 143 AACAACTGCGTCAACCACATT 121  
>novel\_mir\_49 Score: 0.5 R03G\_15685  
Query: 1 TAGTCGTTGGTGCATGTGTAGG 22  
|||||:|||||  
Sbjct: 51 ATCAGCAACTACGTACACATCC 30  
>novel\_mir\_49 Score: 0.5 R03G\_15370  
Query: 1 TAGTCGTTGGTGCATGTGTAGG 22  
|||||:|||||  
Sbjct: 627 ATCAGCAACCACGTATAACATCC 606  
>novel\_mir\_49 Score: 0.8 R03G\_12881  
Query: 1 TAGTCGTTGGTGCATGTGTAGG 22  
|||:|||||:|  
Sbjct: 399 ATCGGCAACCACGTACACATTC 378  
>novel\_mir\_49 Score: 0.0 R03G\_12244  
Query: 1 TAGTCGTTGGTGCATGTGTAGG 22  
|||||  
Sbjct: 585 ATCAGCAACCACGTACACATCC 564  
>novel\_mir\_49 Score: 0.0 R03G\_12461  
Query: 1 TAGTCGTTGGTGCATGTGTAGG 22  
|||||  
Sbjct: 585 ATCAGCAACCACGTACACATCC 564  
>novel\_mir\_49 Score: 0.5 R03G\_07488  
Query: 1 TAGTCGTTGGTGCATGTGTAGG 22  
|||||:|||||  
Sbjct: 699 ATCAGCAACCACGTATAACATCC 678  
>novel\_mir\_49 Score: 2.5 R03G\_06395  
Query: 1 TAGTCGTTGGTGCATGTGTAGG 22  
|||||\*|\*||:|:|  
Sbjct: 682 ATCAGCAACCACCTCCATATCT 661  
>novel\_mir\_49 Score: 0.0 R03G\_02422

Query: 1 TAGTCGTTGGTGCATGTGTAGG 22  
|||||  
Sbjct: 51 ATCAGCAACCACGTACACATCC 30  
>novel\_mir\_49 Score: 2.0 R03G\_00789  
Query: 1 TAGTCGTTGGTGCATGTGTAGG 22  
|||||\*|||||\*|||||  
Sbjct: 489 ATCAGCCACCACGAACACATCC 468  
>novel\_mir\_106 Score: 0.0 R03G\_15388  
Query: 1 TGAATTAGGTTCAACATTATGTT 23  
|||||  
Sbjct: 582 ACTTAATCCAAGTTGTAATACAA 560  
>novel\_mir\_106 Score: 0.0 R03G\_15573  
Query: 1 TGAATTAGGTTCAACATTATGTT 23  
|||||  
Sbjct: 4719 ACTTAATCCAAGTTGTAATACAA 4697  
>novel\_mir\_106 Score: 0.0 R03G\_13849  
Query: 1 TGAATTAGGTTCAACATTATGTT 23  
|||||  
Sbjct: 4719 ACTTAATCCAAGTTGTAATACAA 4697  
>novel\_mir\_106 Score: 0.0 R03G\_10991  
Query: 1 TGAATTAGGTTCAACATTATGTT 23  
|||||  
Sbjct: 4719 ACTTAATCCAAGTTGTAATACAA 4697  
>novel\_mir\_106 Score: 0.5 R03G\_07969  
Query: 1 TGAATTAGGTTCAACATTATGTT 23  
|||||:|:|  
Sbjct: 327 ACTTAATCCAAGTTGTAGTGCAA 305  
>novel\_mir\_106 Score: 0.0 R03G\_05865  
Query: 1 TGAATTAGGTTCAACATTATGTT 23  
|||||  
Sbjct: 4371 ACTTAATCCAAGTTGTAATACAA 4349  
>novel\_mir\_106 Score: 0.0 R03G\_06502  
Query: 1 TGAATTAGGTTCAACATTATGTT 23  
|||||  
Sbjct: 4596 ACTTAATCCAAGTTGTAATACAA 4574  
>novel\_mir\_106 Score: 0.0 R03G\_02707  
Query: 1 TGAATTAGGTTCAACATTATGTT 23  
|||||  
Sbjct: 2268 ACTTAATCCAAGTTGTAATACAA 2246  
>novel\_mir\_106 Score: 0.0 R03G\_02966  
Query: 1 TGAATTAGGTTCAACATTATGTT 23  
|||||  
Sbjct: 3990 ACTTAATCCAAGTTGTAATACAA 3968  
>novel\_mir\_106 Score: 0.0 R03G\_03749  
Query: 1 TGAATTAGGTTCAACATTATGTT 23



|||||  
Sbjct: 4719 ACTTAATCCAAGTTGTAATACAA 4697  
>novel\_mir\_106 Score: 0.0 R03G\_01733  
Query: 1 TGAATTAGGTTCAACATTATGTT 23  
|||||  
Sbjct: 4521 ACTTAATCCAAGTTGTAATACAA 4499  
>novel\_mir\_106 Score: 0.0 R03G\_01944  
Query: 1 TGAATTAGGTTCAACATTATGTT 23  
|||||  
Sbjct: 4719 ACTTAATCCAAGTTGTAATACAA 4697  
>novel\_mir\_106 Score: 0.0 R03G\_17287  
Query: 1 TGAATTAGGTTCAACATTATGTT 23  
|||||  
Sbjct: 4719 ACTTAATCCAAGTTGTAATACAA 4697  
>novel\_mir\_115 Score: 0.0 R03G\_15669  
Query: 1 TACAACACTCGCGACATGTACA 22  
|||||  
Sbjct: 110 ATGTTGTGAGCGCTGTACATGT 89  
>novel\_mir\_94 Score: 1.0 R03G\_15930  
Query: 1 TGAAGGAACTTGCTAAATTT 20  
:||||:|||||:||  
Sbjct: 278 GCTTCTTTGAACGATTTGAA 259  
>novel\_mir\_94 Score: 0.8 R03G\_16108  
Query: 1 TGAAGGAACTTGCTAAATTT 20  
||||:|||||:||  
Sbjct: 1076 ACTTCTTTGAACGATTTGAA 1057  
>novel\_mir\_94 Score: 0.8 R03G\_14870  
Query: 1 TGAAGGAACTTGCTAAATTT 20  
||||:|||||:||  
Sbjct: 2408 ACTTCTTTGAACGATTTGAA 2389  
>novel\_mir\_94 Score: 1.2 R03G\_14528  
Query: 1 TGAAGGAACTTGCTAAATTT 20  
|||||\*||||:||  
Sbjct: 170 ACTTCCTTGAAAGATTTGAA 151  
>novel\_mir\_94 Score: 1.2 R03G\_14534  
Query: 1 TGAAGGAACTTGCTAAATTT 20  
|||||\*||||:||  
Sbjct: 170 ACTTCCTTGAAAGATTTGAA 151  
>novel\_mir\_94 Score: 0.8 R03G\_14765  
Query: 1 TGAAGGAACTTGCTAAATTT 20  
||||:|||||:||  
Sbjct: 143 ACTTCTTTGAACGATTTGAA 124  
>novel\_mir\_94 Score: 0.8 R03G\_14186  
Query: 1 TGAAGGAACTTGCTAAATTT 20  
||||:|||||:||

Sbjct: 2408 ACTTCTTTGAACGATTTGAA 2389  
>novel\_mir\_94 Score: 0.8 R03G\_14190  
Query: 1 TGAAGGAACTTGCTAAATTT 20  
|||||:|||||||:|

Sbjct: 2408 ACTTCTTTGAACGATTTGAA 2389  
>novel\_mir\_94 Score: 0.8 R03G\_12751  
Query: 1 TGAAGGAACTTGCTAAATTT 20  
|||||:|||||||:|

Sbjct: 170 ACTTCTTTGAACGATTTGAA 151  
>novel\_mir\_94 Score: 0.8 R03G\_13228  
Query: 1 TGAAGGAACTTGCTAAATTT 20  
|||||:|||||||:|

Sbjct: 1997 ACTTCTTTGAACGATTTGAA 1978  
>novel\_mir\_94 Score: 0.0 R03G\_12137  
Query: 1 TGAAGGAACTTGCTAAATTT 20  
|||||||

Sbjct: 170 ACTTCCTTGAACGATTTAAA 151  
>novel\_mir\_94 Score: 0.8 R03G\_12469  
Query: 1 TGAAGGAACTTGCTAAATTT 20  
|||||:|||||||:|

Sbjct: 170 ACTTCTTTGAACGATTTGAA 151  
>novel\_mir\_94 Score: 0.8 R03G\_10254  
Query: 1 TGAAGGAACTTGCTAAATTT 20  
|||||:|||||||:|

Sbjct: 143 ACTTCTTTGAACGATTTGAA 124  
>novel\_mir\_94 Score: 0.0 R03G\_09336  
Query: 1 TGAAGGAACTTGCTAAATTT 20  
|||||||

Sbjct: 170 ACTTCCTTGAACGATTTAAA 151  
>novel\_mir\_94 Score: 0.8 R03G\_08674  
Query: 1 TGAAGGAACTTGCTAAATTT 20  
|||||:|||||||:|

Sbjct: 170 ACTTCTTTGAACGATTTGAA 151  
>novel\_mir\_94 Score: 0.8 R03G\_08806  
Query: 1 TGAAGGAACTTGCTAAATTT 20  
|||||:|||||||:|

Sbjct: 2408 ACTTCTTTGAACGATTTGAA 2389  
>novel\_mir\_94 Score: 0.8 R03G\_07245  
Query: 1 TGAAGGAACTTGCTAAATTT 20  
|||||:|||||||:|

Sbjct: 170 ACTTCTTTGAACGATTTGAA 151  
>novel\_mir\_94 Score: 0.8 R03G\_07551  
Query: 1 TGAAGGAACTTGCTAAATTT 20  
|||||:|||||||:|

Sbjct: 170 ACTTCTTTGAACGATTTGAA 151

>novel\_mir\_94 Score: 0.0 R03G\_04581  
Query: 1 TGAAGGAACTTGCTAAATTT 20  
|||||  
Sbjct: 170 ACTTCCTTGAACGATTTAAA 151  
>novel\_mir\_94 Score: 0.0 R03G\_04585  
Query: 1 TGAAGGAACTTGCTAAATTT 20  
|||||  
Sbjct: 170 ACTTCCTTGAACGATTTAAA 151  
>novel\_mir\_94 Score: 1.2 R03G\_05002  
Query: 1 TGAAGGAACTTGCTAAATTT 20  
||||:||||:||||:|  
Sbjct: 170 ACTTCTTTGAATGATTTGAA 151  
>novel\_mir\_94 Score: 1.2 R03G\_05039  
Query: 1 TGAAGGAACTTGCTAAATTT 20  
||||||\*||||||:|  
Sbjct: 257 ACTTCCTTAAACGATTTGAA 238  
>novel\_mir\_94 Score: 0.8 R03G\_05362  
Query: 1 TGAAGGAACTTGCTAAATTT 20  
||||:|||||||:|  
Sbjct: 170 ACTTCTTTGAACGATTTGAA 151  
>novel\_mir\_94 Score: 1.8 R03G\_02997  
Query: 1 TGAAGGAACTTGCTAAATTT 20  
||||:||\*||||||:|  
Sbjct: 170 ACTTCTTTGTACGATTTGAA 151  
>novel\_mir\_94 Score: 0.8 R03G\_00367  
Query: 1 TGAAGGAACTTGCTAAATTT 20  
||||:|||||||:|  
Sbjct: 170 ACTTCTTTGAACGATTTGAA 151  
>novel\_mir\_94 Score: 1.8 R03G\_01029  
Query: 1 TGAAGGAACTTGCTAAATTT 20  
||||:||\*||||||:|  
Sbjct: 1208 ACTTCTTTAAACGATTTGAA 1189  
>novel\_mir\_94 Score: 0.0 R03G\_16970  
Query: 1 TGAAGGAACTTGCTAAATTT 20  
|||||  
Sbjct: 170 ACTTCCTTGAACGATTTAAA 151  
>novel\_mir\_94 Score: 0.0 R03G\_16984  
Query: 1 TGAAGGAACTTGCTAAATTT 20  
|||||  
Sbjct: 143 ACTTCCTTGAACGATTTAAA 124  
>novel\_mir\_66 Score: 1.8 R03G\_16003  
Query: 1 TATTGGAATATTCTGGAGTGGA 22  
:||||\*||||||\*|||  
Sbjct: 325 GTAACCGTATAAGACCTAACCT 304  
>novel\_mir\_55 Score: 0.0 R03G\_16148

Query: 1 TAGAGAGAGCAGCACAGAAG 20  
|||||  
Sbjct: 267 ATCTCTCTCGTCGTGTCTTC 248  
>novel\_mir\_55 Score: 0.0 R03G\_14371  
Query: 1 TAGAGAGAGCAGCACAGAAG 20  
|||||  
Sbjct: 1326 ATCTCTCTCGTCGTGTCTTC 1307  
>novel\_mir\_55 Score: 0.5 R03G\_13908  
Query: 1 TAGAGAGAGCAGCACAGAAG 20  
|||||:|||||  
Sbjct: 1158 ATCTCTCTTGTCTGTCTTC 1139  
>novel\_mir\_55 Score: 0.0 R03G\_11179  
Query: 1 TAGAGAGAGCAGCACAGAAG 20  
|||||  
Sbjct: 162 ATCTCTCTCGTCGTGTCTTC 143  
>novel\_mir\_55 Score: 1.5 R03G\_11093  
Query: 1 TAGAGAGAGCAGCACAGAAG 20  
|||\*:|||||  
Sbjct: 672 ATCCTTCTCGTCGTGTCTTC 653  
>novel\_mir\_55 Score: 1.0 R03G\_02935  
Query: 1 TAGAGAGAGCAGCACAGAAG 20  
|||||\*|||  
Sbjct: 753 ATCTCTCTCGTCGTGTATTC 734  
>novel\_mir\_55 Score: 1.8 R03G\_00105  
Query: 1 TAGAGAGAGCAGCACAGAAG 20  
\*|||||:|||||\*|:  
Sbjct: 6048 CTCTCTCTTGTCTGTCTTC 6029  
>novel\_mir\_55 Score: 1.0 R03G\_00716  
Query: 1 TAGAGAGAGCAGCACAGAAG 20  
|\*|||||  
Sbjct: 1311 AGCTCTCTCGTCGTGTCTTC 1292  
>novel\_mir\_55 Score: 0.0 R03G\_02203  
Query: 1 TAGAGAGAGCAGCACAGAAG 20  
|||||  
Sbjct: 747 ATCTCTCTCGTCGTGTCTTC 728  
>novel\_mir\_82 Score: 2.5 R03G\_16142  
Query: 1 TATATACAGTAGGTCACAAAAC 22  
|\*:|||||\*|||  
Sbjct: 126 ACGTATGTCATCCAGTTTTTTG 105  
>novel\_mir\_82 Score: 1.5 R03G\_15894  
Query: 1 TATATACAGTAGGTCACAAAAC 22  
\*|||||\*|||  
Sbjct: 573 CTATATGTCATCCAGTTTTTTG 552  
>novel\_mir\_82 Score: 2.0 R03G\_15273  
Query: 1 TATATACAGTAGGTCACAAAAC 22



Sbjct: 941 ATCACTGGAAAGTACACGCC 922  
>novel\_mir\_61 Score: 2.0 R03G\_11199  
Query: 1 TAGTGGCCTTTCATATTCGG 20  
||||:|||||||\*||  
Sbjct: 923 ATCATCGAAAGTATACACC 904  
>novel\_mir\_61 Score: 1.5 R03G\_11364  
Query: 1 TAGTGGCCTTTCATATTCGG 20  
|||||||\*||  
Sbjct: 917 ATCACCGAAAGTATACACC 898  
>novel\_mir\_61 Score: 2.5 R03G\_08570  
Query: 1 TAGTGGCCTTTCATATTCGG 20  
||||:||||||\*||  
Sbjct: 32 ATCACTGGAAAGTACACGCC 13  
>novel\_mir\_61 Score: 1.5 R03G\_01465  
Query: 1 TAGTGGCCTTTCATATTCGG 20  
|||||||\*||  
Sbjct: 260 ATCACCGAAAGTATACACC 241  
>novel\_mir\_61 Score: 1.5 R03G\_01842  
Query: 1 TAGTGGCCTTTCATATTCGG 20  
|||||||\*||  
Sbjct: 695 ATCACCGAAAGTATACACC 676  
>novel\_mir\_4 Score: 2.5 R03G\_14269  
Query: 1 TAATAAAAAAGTTAAGAGCAAG 22  
\*|||||||:|:|\*||\*  
Sbjct: 24 CTTATTTTTTCAGTTTTGGTTG 3  
>novel\_mir\_4 Score: 2.5 R03G\_04411  
Query: 1 TAATAAAAAAGTTAAGAGCAA-G 22  
||||\*|||||||:|\*||\*|  
Sbjct: 297 ATTATATTTTCAATTTTCATTAC 275  
>novel\_mir\_4 Score: 2.5 R03G\_00215  
Query: 1 TAATAAAAAAGTTAAGAGCAAG 22  
\*|||||||\*|\*|||\*|  
Sbjct: 66 TTTATTTTTTCTGTTCTCGTAC 45  
>novel\_mir\_109 Score: 0.0 R03G\_04663  
Query: 1 TATAGTCAACACCATACCATGCT 23  
|||||||\*|||  
Sbjct: 106 ATATCAGTTGTGGTATGGTACGA 84  
>novel\_mir\_75 Score: 2.5 R03G\_03211  
Query: 1 TGGCTTATGAATGTATTGGATT 22  
||||\*||||||\*|||:|:  
Sbjct: 433 ACCGATTACTTACACAACCTTAG 412  
>novel\_mir\_92 Score: 2.0 R03G\_05855  
Query: 1 TGCTTGAAAATTGCATCGACA 22  
|||||||\*||||\*||\*||  
Sbjct: 4443 ACGAACCTTTTTACGTATCCGT 4422

>novel\_mir\_34 Score: 0.2 R03G\_15287  
Query: 1 TATACAGTGACCCACAAAATTGT 23  
:|||||  
Sbjct: 661 GTATGTCACTGGGTGTTTAAACA 639  
>novel\_mir\_34 Score: 2.5 R03G\_08841  
Query: 1 TATACAGTGACCCACAAAATTGT 23  
\*\*|||||\*|||||  
Sbjct: 66 TGATGTCACTGGGTATTTAAACA 44  
>novel\_mir\_11 Score: 2.0 R03G\_13925  
Query: 1 TGTTGTTCTTTAACTGATCTGGG 23  
|\*|||||\*|:|  
Sbjct: 148 AGAACAAGAAATTGACTA-ATTC 127  
>novel\_mir\_11 Score: 2.5 R03G\_09271  
Query: 1 TGTTGTTCTTTAACTGATCTGGG 23  
|||||:|||||\*\*|\*|\*  
Sbjct: 293 ACAACAAGAAGTTGACTTCAACA 271  
>novel\_mir\_11 Score: 2.2 R03G\_09894  
Query: 1 TGTTGTTCTTTAACTGATCTGGG 23  
|||:|||||\*|||\*|||:  
Sbjct: 2507 ACAGCAAGAAATTTACTAAACCT 2485  
>novel\_mir\_6 Score: 2.2 R03G\_16620  
Query: 1 TAGAAACAAAGATCGAGAA-ACA 22  
:|||||:|\*||\*|||  
Sbjct: 625 GTCTTTGTTTCTAGTTATTGTGT 603  
>novel\_mir\_6 Score: 0.5 R03G\_14524  
Query: 1 TAGAAACAAAGATCGAGAAACA 22  
|||||:|||||  
Sbjct: 23 ATCTTTGTTTCTAGTTCTTTGT 2  
>novel\_mir\_6 Score: 0.0 R03G\_08103  
Query: 1 TAGAAACAAAGATCGAGAAACA 22  
|||||:|||||  
Sbjct: 53 ATCTTTGTTTCTAGCTCTTTGT 32  
>novel\_mir\_6 Score: 1.0 R03G\_00310  
Query: 1 TAGAAACAAAGATCGAGAAACA 22  
||:|||||:|||||  
Sbjct: 53 ATTTTGTCTAGTTCTTTGT 32  
>novel\_mir\_60 Score: 2.5 R03G\_15250  
Query: 1 TGTCTGGTGCAGATGTTGACGA 22  
\*:|||||:||||:|||\*|  
Sbjct: 4091 TTAGACCACGTTTACAGCTGAT 4070  
>novel\_mir\_60 Score: 2.5 R03G\_14355  
Query: 1 TGTCTGGTGCAGATGTTGACGA 22  
\*:|||||:||||:|||\*|  
Sbjct: 2342 TTAGACCACGTTTACAGCTGAT 2321  
>novel\_mir\_60 Score: 2.5 R03G\_13867

Query: 1 TGTCTGGTGCAGATGTTGACGA 22  
\*:|||||:||||:|||\*|  
Sbjct: 4052 TTAGACCACGTTTACAGCTGAT 4031  
>novel\_mir\_60 Score: 2.5 R03G\_13920  
Query: 1 TGTCTGGTGCAGATGTTGACGA 22  
\*:|||||:||||:|||\*|  
Sbjct: 4136 TTAGACCACGTTTACAGCTGAT 4115  
>novel\_mir\_60 Score: 2.5 R03G\_13749  
Query: 1 TGTCTGGTGCAGATGTTGACGA 22  
\*:|||||:||||:|||\*|  
Sbjct: 2645 TTAGACCACGTTTACAGCTGAT 2624  
>novel\_mir\_60 Score: 2.5 R03G\_11776  
Query: 1 TGTCTGGTGCAGATGTTGACGA 22  
\*:|||||:||||:|||\*|  
Sbjct: 1226 TTAGACCACGTTTACAGCTGAT 1205  
>novel\_mir\_60 Score: 2.5 R03G\_10558  
Query: 1 TGTCTGGTGCAGATGTTGACGA 22  
\*:|||||:||||:|||\*|  
Sbjct: 1889 TTAGACCACGTTTACAGCTGAT 1868  
>novel\_mir\_60 Score: 2.5 R03G\_09965  
Query: 1 TGTCTGGTGCAGATGTTGACGA 22  
\*:|||||:||||:|||\*|  
Sbjct: 4136 TTAGACCACGTTTACAGCTGAT 4115  
>novel\_mir\_60 Score: 2.5 R03G\_05619  
Query: 1 TGTCTGGTGCAGATGTTGACGA 22  
\*:|||||:||||:|||\*|  
Sbjct: 2279 TTAGACCACGTTTACAGCTGAT 2258  
>novel\_mir\_60 Score: 2.5 R03G\_06427  
Query: 1 TGTCTGGTGCAGATGTTGACGA 22  
\*:|||||:||||:|||\*|  
Sbjct: 3728 TTAGACCACGTTTACAGCTGAT 3707  
>novel\_mir\_60 Score: 2.5 R03G\_06428  
Query: 1 TGTCTGGTGCAGATGTTGACGA 22  
\*:|||||:||||:|||\*|  
Sbjct: 3230 TTAGACCACGTTTACAGCTGAT 3209  
>novel\_mir\_60 Score: 2.5 R03G\_06442  
Query: 1 TGTCTGGTGCAGATGTTGACGA 22  
\*:|||||:||||:|||\*|  
Sbjct: 4793 TTAGACCACGTTTACAGCTGAT 4772  
>novel\_mir\_60 Score: 2.5 R03G\_02691  
Query: 1 TGTCTGGTGCAGATGTTGACGA 22  
\*:|||||:||||:|||\*|  
Sbjct: 7625 TTAGACCACGTTTACAGCTGAT 7604  
>novel\_mir\_60 Score: 2.5 R03G\_02959  
Query: 1 TGTCTGGTGCAGATGTTGACGA 22



\*:|||||||:||||:|||\*|  
Sbjct: 4136 TTAGACCACGTTTACAGCTGAT 4115  
>novel\_mir\_60 Score: 2.5 R03G\_03547  
Query: 1 TGTCTGGTGCAGATGTTGACGA 22  
\*:|||||||:||||:|||\*|  
Sbjct: 4136 TTAGACCACGTTTACAGCTGAT 4115  
>novel\_mir\_60 Score: 2.5 R03G\_04115  
Query: 1 TGTCTGGTGCAGATGTTGACGA 22  
\*:|||||||:||||:|||\*|  
Sbjct: 1079 TTAGACCACGTTTACAGCTGAT 1058  
>novel\_mir\_60 Score: 2.5 R03G\_01330  
Query: 1 TGTCTGGTGCAGATGTTGACGA 22  
\*:|||||||:||||:|||\*|  
Sbjct: 1370 TTAGACCACGTTTACAGCTGAT 1349  
>novel\_mir\_60 Score: 2.5 R03G\_01613  
Query: 1 TGTCTGGTGCAGATGTTGACGA 22  
\*:|||||||:||||:|||\*|  
Sbjct: 2333 TTAGACCACGTTTACAGCTGAT 2312  
>novel\_mir\_60 Score: 2.5 R03G\_02222  
Query: 1 TGTCTGGTGCAGATGTTGACGA 22  
\*:|||||||:||||:|||\*|  
Sbjct: 1190 TTAGACCACGTTTACAGCTGAT 1169  
>novel\_mir\_60 Score: 2.5 R03G\_17404  
Query: 1 TGTCTGGTGCAGATGTTGACGA 22  
\*:|||||||:||||:|||\*|  
Sbjct: 764 TTAGACCACGTTTACAGCTGAT 743  
>novel\_mir\_60 Score: 2.5 R03G\_17371  
Query: 1 TGTCTGGTGCAGATGTTGACGA 22  
\*:|||||||:||||:|||\*|  
Sbjct: 4091 TTAGACCACGTTTACAGCTGAT 4070  
>novel\_mir\_60 Score: 2.5 R03G\_17326  
Query: 1 TGTCTGGTGCAGATGTTGACGA 22  
\*:|||||||:||||:|||\*|  
Sbjct: 3968 TTAGACCACGTTTACAGCTGAT 3947  
>novel\_mir\_89 Score: 2.0 R03G\_12056  
Query: 1 TGATGTGGGGTGCATGACGTT 22  
|||||||\*|||||||:~:  
Sbjct: 176 ACTACACCCCAACGTAAGTCTG 155  
>novel\_mir\_89 Score: 2.0 R03G\_03770  
Query: 1 TGATGTGGGGTGCATGACGTT 22  
|||||||\*|||||||:~:  
Sbjct: 188 ACTACACCCCAACGTAAGTCTG 167  
>novel\_mir\_35 Score: 2.5 R03G\_01980  
Query: 1 TGAAAACTAGTGAATGAGT-CT 22  
|:|||||||\*|||||||:~|:

Sbjct: 246 ATTTTTTGATGACTTACTTACGG 224  
>novel\_mir\_50 Score: 0.0 R03G\_16376  
Query: 1 TTGCCATGTAGGAAGATCATT 21  
|||||

Sbjct: 369 AACGGTACATCCTTCTAGTAA 349  
>novel\_mir\_50 Score: 0.0 R03G\_15573  
Query: 1 TTGCCATGTAGGAAGATCATT 21  
|||||

Sbjct: 444 AACGGTACATCCTTCTAGTAA 424  
>novel\_mir\_50 Score: 2.5 R03G\_15000  
Query: 1 TTGCCATGTAGGAAGATCATT 21  
||||\*|||||\*|:|||||

Sbjct: 450 AACGTTACATCCGTTTAGTAA 430  
>novel\_mir\_50 Score: 0.0 R03G\_13849  
Query: 1 TTGCCATGTAGGAAGATCATT 21  
|||||

Sbjct: 444 AACGGTACATCCTTCTAGTAA 424  
>novel\_mir\_50 Score: 0.0 R03G\_10420  
Query: 1 TTGCCATGTAGGAAGATCATT 21  
|||||

Sbjct: 444 AACGGTACATCCTTCTAGTAA 424  
>novel\_mir\_50 Score: 2.5 R03G\_10568  
Query: 1 TTGCCATGTAGGAAGATC-ATT 21  
|||||:|\*|:|||\*|||

Sbjct: 44 AACGGTACATTATTTTAGCTAA 23  
>novel\_mir\_50 Score: 0.0 R03G\_10965  
Query: 1 TTGCCATGTAGGAAGATCATT 21  
|||||

Sbjct: 444 AACGGTACATCCTTCTAGTAA 424  
>novel\_mir\_50 Score: 0.0 R03G\_10991  
Query: 1 TTGCCATGTAGGAAGATCATT 21  
|||||

Sbjct: 444 AACGGTACATCCTTCTAGTAA 424  
>novel\_mir\_50 Score: 2.5 R03G\_07991  
Query: 1 TTGCCATGTAGGAAGATCATT 21  
||||\*||::|\*|||\*||

Sbjct: 453 AACGTTATGTCCTTCTAGCAA 433  
>novel\_mir\_50 Score: 2.5 R03G\_07972  
Query: 1 TTGCCATGTAGGAAGATCATT 21  
||||\*||::|\*|||\*||

Sbjct: 453 AACGTTATGTCCTTCTAGCAA 433  
>novel\_mir\_50 Score: 0.0 R03G\_05865  
Query: 1 TTGCCATGTAGGAAGATCATT 21  
|||||

Sbjct: 444 AACGGTACATCCTTCTAGTAA 424

>novel\_mir\_50 Score: 0.0 R03G\_06502  
Query: 1 TTGCCATGTAGGAAGATCATT 21  
|||||  
Sbjct: 444 AACGGTACATCCTTCTAGTAA 424

>novel\_mir\_50 Score: 0.0 R03G\_04662  
Query: 1 TTGCCATGTAGGAAGATCATT 21  
|||||  
Sbjct: 300 AACGGTACATCCTTCTAGTAA 280

>novel\_mir\_50 Score: 0.0 R03G\_02708  
Query: 1 TTGCCATGTAGGAAGATCATT 21  
|||||  
Sbjct: 177 AACGGTACATCCTTCTAGTAA 157

>novel\_mir\_50 Score: 0.0 R03G\_03749  
Query: 1 TTGCCATGTAGGAAGATCATT 21  
|||||  
Sbjct: 444 AACGGTACATCCTTCTAGTAA 424

>novel\_mir\_50 Score: 2.5 R03G\_01056  
Query: 1 TTGCCATGTAGGAAGATCATT 21  
|||||\*|||||\*:|||  
Sbjct: 444 AACGGTTCATCCTTCCGGTAA 424

>novel\_mir\_50 Score: 0.0 R03G\_01733  
Query: 1 TTGCCATGTAGGAAGATCATT 21  
|||||  
Sbjct: 444 AACGGTACATCCTTCTAGTAA 424

>novel\_mir\_50 Score: 0.0 R03G\_01944  
Query: 1 TTGCCATGTAGGAAGATCATT 21  
|||||  
Sbjct: 444 AACGGTACATCCTTCTAGTAA 424

>novel\_mir\_50 Score: 0.0 R03G\_17446  
Query: 1 TTGCCATGTAGGAAGATCATT 21  
|||||  
Sbjct: 444 AACGGTACATCCTTCTAGTAA 424

>novel\_mir\_50 Score: 0.0 R03G\_17287  
Query: 1 TTGCCATGTAGGAAGATCATT 21  
|||||  
Sbjct: 444 AACGGTACATCCTTCTAGTAA 424

>novel\_mir\_59 Score: 2.5 R03G\_14178  
Query: 1 TCGTTCCTAAATCAATCTCA 20  
\*|:|||||\*||||\*||  
Sbjct: 1267 TGTAAGGATTTTGTAG-GT 1249

>novel\_mir\_59 Score: 2.0 R03G\_12164  
Query: 1 TCGTTCCTAAATCAATCTCA 20  
|||||\*|||||  
Sbjct: 274 AGCAAGGATTATGTTAGAGT 255

>novel\_mir\_59 Score: 0.0 R03G\_11601



|||||\*||:|  
Sbjct: 1194 AACGAGTTAACCTAATTCGA 1175  
>novel\_mir\_76 Score: 2.2 R03G\_16443  
Query: 1 TTGCTCAATTGGATTCAGTT 20  
|||||\*|||||\*||:|  
Sbjct: 162 AACGAGCTAACCTAACTCGA 143  
>novel\_mir\_76 Score: 2.5 R03G\_16275  
Query: 1 TTGCTCAATTGGATTCAGTT 20  
|||||\*|||||\*|::|  
Sbjct: 276 AACGAGTTATCCTAAATTGA 257  
>novel\_mir\_76 Score: 0.0 R03G\_15904  
Query: 1 TTGCTCAATTGGATTCAGTT 20  
|||||\*|||||\*|:|  
Sbjct: 1053 AACGAGTTAACCTAAGTCAA 1034  
>novel\_mir\_76 Score: 1.5 R03G\_15167  
Query: 1 TTGCTCAATTGGATTCAGTT 20  
:|||||\*|||||:|  
Sbjct: 1173 GACGAGTTATCCTAAGTTAA 1154  
>novel\_mir\_76 Score: 2.2 R03G\_14361  
Query: 1 TTGCTCAATTGGATTCAGTT 20  
\*|||||\*|||||\*|:|  
Sbjct: 834 TACGAGCTAACCTAAGTTTA 815  
>novel\_mir\_76 Score: 2.2 R03G\_14568  
Query: 1 TTGCTCAATTGGATTCAGTT 20  
\*|||||\*|||||\*|:|  
Sbjct: 834 TACGAGCTAACCTAAGTTTA 815  
>novel\_mir\_76 Score: 2.2 R03G\_14576  
Query: 1 TTGCTCAATTGGATTCAGTT 20  
|||||\*|||||\*||:|  
Sbjct: 351 AACGAGCTAACCTAACTCAG 332  
>novel\_mir\_76 Score: 1.0 R03G\_14342  
Query: 1 TTGCTCAATTGGATTCAGTT 20  
|||||\*|||||\*|||  
Sbjct: 774 AACGAGTTAACCTAACTCAA 755  
>novel\_mir\_76 Score: 2.2 R03G\_13419  
Query: 1 TTGCTCAATTGGATTCAGTT 20  
|||||\*|||||\*||:|  
Sbjct: 363 AACGAGTTATCCTAATTCGA 344  
>novel\_mir\_76 Score: 2.2 R03G\_13839  
Query: 1 TTGCTCAATTGGATTCAGTT 20  
:|||||\*|||||\*|||  
Sbjct: 426 GACGAGATAACCTAACTCAA 407  
>novel\_mir\_76 Score: 0.2 R03G\_12985  
Query: 1 TTGCTCAATTGGATTCAGTT 20  
:|||||\*|||||\*|||

Sbjct: 1116 GACGAGTTAACCTAAGTCAA 1097  
>novel\_mir\_76 Score: 0.2 R03G\_12986  
Query: 1 TTGCTCAATTGGATTCAGTT 20  
:|||||||||||||||||  
Sbjct: 1116 GACGAGTTAACCTAAGTCAA 1097  
>novel\_mir\_76 Score: 2.2 R03G\_13026  
Query: 1 TTGCTCAATTGGATTCAGTT 20  
|||||||||\*|||||\*||:|  
Sbjct: 741 AACGAGTTATCCTAATTCGA 722  
>novel\_mir\_76 Score: 2.5 R03G\_13060  
Query: 1 TTGCTCAATTGGATTCAGTT 20  
:|||||||||\*|||||\*||:|  
Sbjct: 465 GACGAGTTATCCTAAATCGA 446  
>novel\_mir\_76 Score: 2.2 R03G\_11966  
Query: 1 TTGCTCAATTGGATTCAGTT 20  
\*|||||\*|||||||||:|\*|  
Sbjct: 834 TACGAGCTAACCTAAGTTTA 815  
>novel\_mir\_76 Score: 2.0 R03G\_12177  
Query: 1 TTGCTCAATTGGATTCAGTT 20  
\*|||||||||||||\*|||||\*|  
Sbjct: 834 CACGAGTTAACCCAAGTCCA 815  
>novel\_mir\_76 Score: 0.2 R03G\_12228  
Query: 1 TTGCTCAATTGGATTCAGTT 20  
:|||||||||||||||||  
Sbjct: 1116 GACGAGTTAACCTAAGTCAA 1097  
>novel\_mir\_76 Score: 0.2 R03G\_12229  
Query: 1 TTGCTCAATTGGATTCAGTT 20  
:|||||||||||||||||  
Sbjct: 1116 GACGAGTTAACCTAAGTCAA 1097  
>novel\_mir\_76 Score: 1.2 R03G\_12457  
Query: 1 TTGCTCAATTGGATTCAGTT 20  
|||||||||||||||||\*||:|  
Sbjct: 1062 AACGAGTTAACCTAACTCGA 1043  
>novel\_mir\_76 Score: 2.0 R03G\_11267  
Query: 1 TTGCTCAATTGGATTCAGTT 20  
\*|||||||||||||\*|||||\*|  
Sbjct: 834 CACGAGTTAACCCAAGTCCA 815  
>novel\_mir\_76 Score: 2.0 R03G\_11280  
Query: 1 TTGCTCAATTGGATTCAGTT 20  
\*|||||||||||||\*|||||\*|  
Sbjct: 642 CACGAGTTAACCCAAGTCCA 623  
>novel\_mir\_76 Score: 2.2 R03G\_11713  
Query: 1 TTGCTCAATTGGATTCAGTT 20  
|||||||||\*|||\*||:||  
Sbjct: 207 AACGAGTTAAGCTACGTAA 188

>novel\_mir\_76 Score: 2.2 R03G\_10261  
Query: 1 TTGCTCAATTGGATTCAGTT 20  
|||\*|||||\*||||||:|  
Sbjct: 327 AACAAAGTTACCCTAAGTTAA 308

>novel\_mir\_76 Score: 2.0 R03G\_10549  
Query: 1 TTGCTCAATTGGATTCAGTT 20  
\*|||||||\*|||||\*|  
Sbjct: 834 CACGAGTTAACCCAAGTCCA 815

>novel\_mir\_76 Score: 2.2 R03G\_10579  
Query: 1 TTGCTCAATTGGATTCAGTT 20  
|||||||\*||\*||:|  
Sbjct: 414 AACGAGTTAACCCAATCGA 395

>novel\_mir\_76 Score: 1.5 R03G\_10767  
Query: 1 TTGCTCAATTGGATTCAGTT 20  
:|||||||\*||||||:|  
Sbjct: 804 GACGAGTTATCCTAAGTTAA 785

>novel\_mir\_76 Score: 2.2 R03G\_10773  
Query: 1 TTGCTCAATTGGATTCAGTT 20  
\*||||\*|||||||\*|  
Sbjct: 834 TACGAGCTAACCTAAGTTTA 815

>novel\_mir\_76 Score: 2.2 R03G\_10780  
Query: 1 TTGCTCAATTGGATTCAGTT 20  
\*||||\*|||||||\*|  
Sbjct: 834 TACGAGCTAACCTAAGTTTA 815

>novel\_mir\_76 Score: 2.2 R03G\_09194  
Query: 1 TTGCTCAATTGGATTCAGTT 20  
\*||||\*|||||||\*|  
Sbjct: 834 TACGAGCTAACCTAAGTTTA 815

>novel\_mir\_76 Score: 0.0 R03G\_09241  
Query: 1 TTGCTCAATTGGATTCAGTT 20  
|||||||  
Sbjct: 1017 AACGAGTTAACCTAAGTCAA 998

>novel\_mir\_76 Score: 2.5 R03G\_09542  
Query: 1 TTGCTCAATTGGATTCAGTT 20  
\*||||\*|||||||\*:  
Sbjct: 834 TACGAGCTAACCTAAGTTTG 815

>novel\_mir\_76 Score: 2.5 R03G\_09762  
Query: 1 TTGCTCAATTGGATTCAGTT 20  
:||\*|||||||\*||:|  
Sbjct: 114 GACAAGTTAACCTAACTCGA 95

>novel\_mir\_76 Score: 1.5 R03G\_09816  
Query: 1 TTGCTCAATTGGATTCAGTT 20  
:|||||||\*||:|  
Sbjct: 861 GACGAGTTAACCTAACTCGA 842

>novel\_mir\_76 Score: 2.2 R03G\_09945

Query: 1 TTGCTCAATTGGATTCAGTT 20  
\*|||||\*|||||||:|\*|  
Sbjct: 558 TACGAGCTAACCTAAGTTTA 539  
>novel\_mir\_76 Score: 2.2 R03G\_09967  
Query: 1 TTGCTCAATTGGATTCAGTT 20  
\*|||||\*|||||||:|\*|  
Sbjct: 834 TACGAGCTAACCTAAGTTTA 815  
>novel\_mir\_76 Score: 2.5 R03G\_10056  
Query: 1 TTGCTCAATTGGATTCAGTT 20  
|||||||\*|:|||||\*|:  
Sbjct: 2544 AACGAGTTATTCTAAGTTTCG 2525  
>novel\_mir\_76 Score: 2.0 R03G\_07995  
Query: 1 TTGCTCAATTGGATTCAGTT 20  
\*|||||||\*|||||\*|  
Sbjct: 741 CACGAGTTAACCCAAGTCCA 722  
>novel\_mir\_76 Score: 2.0 R03G\_08009  
Query: 1 TTGCTCAATTGGATTCAGTT 20  
|\*||:|||||||\*|  
Sbjct: 67 ATCGGGTTAACCTAAGTCTA 48  
>novel\_mir\_76 Score: 2.0 R03G\_08069  
Query: 1 TTGCTCAATTGGATTCAGTT 20  
|||||||\*|||||\*|||  
Sbjct: 411 AACGAGTTATCCTAACTCAA 392  
>novel\_mir\_76 Score: 1.0 R03G\_08570  
Query: 1 TTGCTCAATTGGATTCAGTT 20  
|||||||\*|||||\*|||  
Sbjct: 153 AACGAGTTAACCTAATTCAA 134  
>novel\_mir\_76 Score: 2.0 R03G\_08653  
Query: 1 TTGCTCAATTGGATTCAGTT 20  
\*|||||||\*|||||\*|  
Sbjct: 834 CACGAGTTAACCCAAGTCTA 815  
>novel\_mir\_76 Score: 2.5 R03G\_09156  
Query: 1 TTGCTCAATTGGATTCAGTT 20  
:|||||||\*|||||\*||:|  
Sbjct: 162 GACGAGTTATCCTAAATCGA 143  
>novel\_mir\_76 Score: 2.5 R03G\_09158  
Query: 1 TTGCTCAATTGGATTCAGTT 20  
:|||||||\*|||||\*||:|  
Sbjct: 162 GACGAGTTATCCTAAATCGA 143  
>novel\_mir\_76 Score: 0.5 R03G\_06813  
Query: 1 TTGCTCAATTGGATTCAGTT 20  
:|||||||\*|||||\*||:|  
Sbjct: 153 GACGAGTTAACCTAAGTCGA 134  
>novel\_mir\_76 Score: 0.5 R03G\_06815  
Query: 1 TTGCTCAATTGGATTCAGTT 20



:|||||||:|  
Sbjct: 1050 GACGAGTTAACCTAAGTCGA 1031  
>novel\_mir\_76 Score: 1.5 R03G\_06971  
Query: 1 TTGCTCAATTGGATTCAGTT 20  
:|||||||:|  
Sbjct: 774 GACGAGTTAGTCTAAGTCGA 755  
>novel\_mir\_76 Score: 1.2 R03G\_07205  
Query: 1 TTGCTCAATTGGATTCAGTT 20  
:|||||||\*|||  
Sbjct: 786 GACGAGTTAACCTAACTCAA 767  
>novel\_mir\_76 Score: 0.5 R03G\_07241  
Query: 1 TTGCTCAATTGGATTCAGTT 20  
:|||||||:|  
Sbjct: 1050 GACGAGTTAACCTAAGTCGA 1031  
>novel\_mir\_76 Score: 0.5 R03G\_07244  
Query: 1 TTGCTCAATTGGATTCAGTT 20  
:|||||||:|  
Sbjct: 1143 GACGAGTTAACCTAAGTCGA 1124  
>novel\_mir\_76 Score: 2.5 R03G\_07446  
Query: 1 TTGCTCAATTGGATTCAGTT 20  
||\*\*|||||||\*||  
Sbjct: 627 AAATAGTTAACCTAAGT-AA 609  
>novel\_mir\_76 Score: 1.5 R03G\_07856  
Query: 1 TTGCTCAATTGGATTCAGTT 20  
:|||||||\*|||||||:|  
Sbjct: 630 GACGAGTTATCCTAAGTTAA 611  
>novel\_mir\_76 Score: 2.2 R03G\_07860  
Query: 1 TTGCTCAATTGGATTCAGTT 20  
\*|||||\*|||||||:|\*|  
Sbjct: 834 TACGAGCTAACCTAAGTTTA 815  
>novel\_mir\_76 Score: 1.5 R03G\_05526  
Query: 1 TTGCTCAATTGGATTCAGTT 20  
:|||||||\*|||||||:|  
Sbjct: 600 GACGAGTTATCCTAAGTTAA 581  
>novel\_mir\_76 Score: 2.0 R03G\_05904  
Query: 1 TTGCTCAATTGGATTCAGTT 20  
\*|||||||\*|||||\*|  
Sbjct: 834 CACGAGTTAACCCAAGTCCA 815  
>novel\_mir\_76 Score: 1.8 R03G\_05921  
Query: 1 TTGCTCAATTGGATTCAGTT 20  
\*|||||||:|||||:|\*|  
Sbjct: 834 TACGAGTTAATCTAAGTTTA 815  
>novel\_mir\_76 Score: 2.2 R03G\_05953  
Query: 1 TTGCTCAATTGGATTCAGTT 20  
\*|||||\*|||||||:|\*|

Sbjct: 834 TACGAGCTAACCTAAGTTTA 815  
>novel\_mir\_76 Score: 2.2 R03G\_05959  
Query: 1 TTGCTCAATTGGATTCAGTT 20  
\*|||||\*|||||||:|\*|  
Sbjct: 834 TACGAGCTAACCTAAGTTTA 815  
>novel\_mir\_76 Score: 2.5 R03G\_05977  
Query: 1 TTGCTCAATTGGATTCAGTT 20  
|||\*|||||\*||||||\*||  
Sbjct: 417 AACAAAGTTATCCTAAGTAAA 398  
>novel\_mir\_76 Score: 2.0 R03G\_06027  
Query: 1 TTGCTCAATTGGATTCAGTT 20  
:||\*|||||||:|:|  
Sbjct: 1161 GACAAGTTAACCTAGGTAA 1142  
>novel\_mir\_76 Score: 1.5 R03G\_06233  
Query: 1 TTGCTCAATTGGATTCAGTT 20  
:||\*|||||||:|  
Sbjct: 1050 GACAAGTTAACCTAAGTTAA 1031  
>novel\_mir\_76 Score: 1.5 R03G\_06235  
Query: 1 TTGCTCAATTGGATTCAGTT 20  
:||\*|||||||:|  
Sbjct: 1050 GACAAGTTAACCTAAGTTAA 1031  
>novel\_mir\_76 Score: 2.0 R03G\_06714  
Query: 1 TTGCTCAATTGGATTCAGTT 20  
|||||||:|\*|||\*|  
Sbjct: 2949 AACGAGTTAACTAAAGTCTA 2930  
>novel\_mir\_76 Score: 2.0 R03G\_04587  
Query: 1 TTGCTCAATTGGATTCAGTT 20  
|||\*||||||\*|||||  
Sbjct: 240 AACAAAGTTAACCCAAGTCAA 221  
>novel\_mir\_76 Score: 2.5 R03G\_04864  
Query: 1 TTGCTCAATTGGATTCAGTT 20  
|||||||:|:||||\*\*||  
Sbjct: 1701 AACGAGTTAGCTTAAGAAAA 1682  
>novel\_mir\_76 Score: 2.2 R03G\_05267  
Query: 1 TTGCTCAATTGGATTCAGTT 20  
\*|||||\*|||||||:|\*|  
Sbjct: 834 TACGAGCTAACCTAAGTTTA 815  
>novel\_mir\_76 Score: 2.5 R03G\_02484  
Query: 1 TTGCTCAATTGGATTCAGTT 20  
|||||\*||||||\*|\*||  
Sbjct: 810 AACGAGCTAACCTAACTAAA 791  
>novel\_mir\_76 Score: 1.2 R03G\_02667  
Query: 1 TTGCTCAATTGGATTCAGTT 20  
:|||||||\*|||  
Sbjct: 384 GACGAGTTAACCTAAATCAA 365

>novel\_mir\_76 Score: 2.0 R03G\_03464  
Query: 1 TTGCTCAATTGGATTCAGTT 20  
|||\*|||\*|||  
Sbjct: 107 AACGTGTTAACCTAACTCAA 88

>novel\_mir\_76 Score: 1.2 R03G\_03724  
Query: 1 TTGCTCAATTGGATTCAGTT 20  
|||\*|||\*|||  
Sbjct: 843 AACGAGTTAACCTAACTCGA 824

>novel\_mir\_76 Score: 2.2 R03G\_03937  
Query: 1 TTGCTCAATTGGATTCAGTT 20  
||\*|||\*|||\*|||  
Sbjct: 774 AAGGAGTTAACCTAAGTTCC 755

>novel\_mir\_76 Score: 2.5 R03G\_04060  
Query: 1 TTGCTCAATTGGATTCAGTT 20  
:|||\*|||\*|||  
Sbjct: 387 GACGAGTTATCCTAACTCGA 368

>novel\_mir\_76 Score: 2.2 R03G\_04207  
Query: 1 TTGCTCAATTGGATTCAGTT 20  
\*|||\*|||\*|||\*|||  
Sbjct: 834 TACGAGCTAACCTAAGTTTA 815

>novel\_mir\_76 Score: 2.2 R03G\_04210  
Query: 1 TTGCTCAATTGGATTCAGTT 20  
\*|||\*|||\*|||\*|||  
Sbjct: 834 TACGAGCTAACCTAAGTTTA 815

>novel\_mir\_76 Score: 2.5 R03G\_00146  
Query: 1 TTGCTCAATTGGATTCAGTT 20  
:|||\*|||\*|||  
Sbjct: 327 GACGAGTTATCCTAAATCGA 308

>novel\_mir\_76 Score: 2.5 R03G\_00172  
Query: 1 TTGCTCAATTGGATTCAGTT 20  
|||:|||\*|||\*|||  
Sbjct: 1036 AACGGGTTAAGCTAAGACAA 1017

>novel\_mir\_76 Score: 2.2 R03G\_00256  
Query: 1 TTGCTCAATTGGATTCAGTT 20  
\*|||\*|||\*|||\*|||  
Sbjct: 834 TACGAGCTAACCTAAGTTTA 815

>novel\_mir\_76 Score: 2.5 R03G\_00455  
Query: 1 TTGCTCAATTGGATTCAGTT 20  
||:||||\*||\*|||  
Sbjct: 179 AATGAGTTAACCCAACTCAA 160

>novel\_mir\_76 Score: 1.5 R03G\_00694  
Query: 1 TTGCTCAATTGGATTCAGTT 20  
:||||\*|||\*|||  
Sbjct: 1173 GACGAGTTATCCTAAGTTAA 1154

>novel\_mir\_76 Score: 2.5 R03G\_00994

Query: 1 TTGCTCAATTGGATTCAG-TT 20  
||||\*||||\*|||||\*||  
Sbjct: 402 AACGAATTAACCTAAGTCTAA 382  
>novel\_mir\_76 Score: 2.0 R03G\_01305  
Query: 1 TTGCTCAATTGGATTCAGTT 20  
\*|||||\*||||\*|  
Sbjct: 834 CACGAGTTAACCCAAGTCCA 815  
>novel\_mir\_76 Score: 2.2 R03G\_01430  
Query: 1 TTGCTCAATTGGATTCAGTT 20  
||||\*|||||\*||:|  
Sbjct: 960 AACGAGCTAACCTAACTCGA 941  
>novel\_mir\_76 Score: 2.0 R03G\_01699  
Query: 1 TTGCTCAATTGGATTCAGTT 20  
\*|||||\*||||\*|  
Sbjct: 210 CACGAGTTAACCCAAGTCCA 191  
>novel\_mir\_76 Score: 2.2 R03G\_17449  
Query: 1 TTGCTCAATTGGATTCAGTT 20  
\*||||\*|||||\*|:|  
Sbjct: 834 TACGAGCTAACCTAAGTTTA 815

Supplemental Table 7: Primers used in this study

|                 |                                                    |
|-----------------|----------------------------------------------------|
| Q-miR1023e-3p-F | GCGGCGGTGGGAAACGGGTTGGA                            |
| Q-miR1023e-3p-R | GTCGTATCCAGTGCAGGGTCCGAGGTATTCGCACTGGATACGACATGCAC |
| Q-miR1028a-3p-F | GCGGCGGTGACATTGTAGAT                               |
| Q-miR1028a-3p-R | GTCGTATCCAGTGCAGGGTCCGAGGTATTCGCACTGGATACGACAACTAC |
| Q-miR1043-3p-F  | GCGGCGG TTGCGCGTTGAGATTT                           |
| Q-miR1043-3p-R  | GTCGTATCCAGTGCAGGGTCCGAGGTATTCGCACTGGATACGACTCCTTC |
| Q-miR1044-3p-F  | GCGGCGGTGTGGTGACATATT                              |
| Q-miR1044-3p-R  | GTCGTATCCAGTGCAGGGTCCGAGGTATTCGCACTGGATACGACCAAACA |
| Q-miR1047-3p-F  | GCGGCGGTGATCAGCATACTT                              |
| Q-miR1047-3p-R  | GTCGTATCCAGTGCAGGGTCCGAGGTATTCGCACTGGATACGACCAACTG |
| Q-miR1048-3p-F  | GCGGCGGTGTCTACGCTTATGT                             |
| Q-miR1048-3p-R  | GTCGTATCCAGTGCAGGGTCCGAGGTATTCGCACTGGATACGACCTAGGA |
| Q-PyrF-F        | CAGCCGCTCTTGAAGATGTC                               |
| Q-PyrF-R        | GTTCCAGCCGTGATCACATC                               |
